# Supplementary material
Source: PubMed Central journal article supplement (PMC4125614)
Supplement: NIHMS600167-supplement-3.pdf [file NIHMS600167-supplement-3.pdf]

| LIVER GO Terms                                                   |                                            |                                                                                                                            |                                              |                                                                    |          |            |
|------------------------------------------------------------------|--------------------------------------------|----------------------------------------------------------------------------------------------------------------------------|----------------------------------------------|--------------------------------------------------------------------|----------|------------|
| Atg7 <sup>lox/lox</sup> ;Fed/Atg7 <sup>Δ/Δ</sup> ;Fed Comparison | Atg7 <sup>Δ/Δ</sup> ;Fed Upregulated Genes | Atg7 <sup>Δ/Δ</sup> ;Fed Upregulated Genes                                                                                 | Atg7 <sup>Δ/Δ</sup> ;Fed Downregulated Genes | Atg7 <sup>Δ/Δ</sup> ;Fed Downregulated Genes                       | p-value  | Bonferroni |
| GO:0006954<br>inflammatory response                              | 15                                         | CHI3L3, CXCL10, ORM3, TLR2, SAA3, SAA2, CD14, ORM2, CXCL2, CXCL1, CXCL13, SAA1, IL1B, LBP, NFKBIZ                          | 0                                            |                                                                    | 1.47E-11 | 8.94E-09   |
| GO:0006952<br>defense response                                   | 19                                         | CXCL1, NFKBIZ, NGP, CAMP, CXCL2, TLR2, SAA3, RSAD2, CHI3L3, CXCL10, SAA2, CXCL13, SAA1, IL1B, LBP, DEFB1, ORM2, CD14, ORM3 | 0                                            |                                                                    | 2.00E-11 | 1.21E-08   |
| GO:0009611<br>response to wounding                               | 16                                         | CHI3L3, CXCL10, ORM3, TLR2, SAA3, SAA2, CD14, F13A1, ORM2, CXCL2, CXCL1, CXCL13, SAA1, IL1B, LBP, NFKBIZ                   | -1                                           | F3                                                                 | 4.07E-11 | 2.47E-08   |
| GO:0006953<br>acute-phase response                               | 7                                          | SAA2, SAA1, SAA3, IL1B, LBP, ORM2, ORM3                                                                                    | 0                                            |                                                                    | 1.14E-08 | 6.90E-06   |
| GO:0006955<br>immune response                                    | 16                                         | CXCL1, IL1RN, CXCL2, TLR2, RSAD2, CXCL10, CXCL13, OASL2, OASL1, GADD45G, IL1B, TGTP1, LBP, DEFB1, GBP2, CD14               | 0                                            |                                                                    | 2.79E-08 | 1.70E-05   |
| GO:0055114<br>oxidation reduction                                | 9                                          | CBR3, NQO1, STEAP4, CYP8B1, CYP2G1, CYP3A41A, SRXN1, SQLE, CYP2F2                                                          | -8                                           | NOX4, HSD3B5, CYP2B13, CYP4A10, CYP4A12A, HSD17B6, CYP4A14, RETSAT | 4.92E-07 | 2.99E-04   |
| GO:0002526<br>acute inflammatory response                        | 7                                          | SAA2, SAA1, SAA3, IL1B, LBP, ORM2, ORM3                                                                                    | 0                                            |                                                                    | 4.99E-06 | 0.003023   |
| GO:0006935<br>chemotaxis                                         | 7                                          | S100A8, CXCL13, CXCL2, S100A9, IL1B, LBP, CXCL10                                                                           | 0                                            |                                                                    | 2.76E-05 | 0.016616   |
| GO:0042330<br>taxis                                              | 7                                          | S100A8, CXCL13, CXCL2, S100A9, IL1B, LBP, CXCL10                                                                           | 0                                            |                                                                    | 2.76E-05 | 0.016616   |

| Atg7 <sup>lox/lox</sup> ;Fed/Atg7 <sup>lox/lox</sup> ;Fasted Comparison | Atg7 <sup>lox/lox</sup> ;Fasted Upregulated Genes | Atg7 <sup>lox/lox</sup> ;Fasted Upregulated Genes                                 | Atg7 <sup>lox/lox</sup> ;Fasted Downregulated Genes | Atg7 <sup>lox/lox</sup> ;Fasted Downregulated Genes                                                               | p-value  | Bonferroni |
|-------------------------------------------------------------------------|---------------------------------------------------|-----------------------------------------------------------------------------------|-----------------------------------------------------|-------------------------------------------------------------------------------------------------------------------|----------|------------|
| GO:0008202<br>steroid metabolic process                                 | 4                                                 | LEPR, CYP17A1, CYP39A1, SULT1E1                                                   | -15                                                 | SREBF1, CYP51, HSD3B2, HSD3B3, HSD3B5, HMGCS1, PMVK, AKR1C20, FDFT1, SC4MOL, SERPINA6, DHCR7, HSD17B6, MVK, NSDHL | 1.78E-16 | 1.48E-13   |
| GO:0006694<br>steroid biosynthetic process                              | 2                                                 | CYP17A1, CYP39A1                                                                  | -12                                                 | CYP51, HSD3B2, HSD3B3, HSD3B5, HMGCS1, PMVK, AKR1C20, FDFT1, SC4MOL, DHCR7, MVK, NSDHL                            | 5.03E-15 | 3.33E-12   |
| GO:0055114<br>oxidation reduction                                       | 10                                                | CYP8B1, CYP17A1, CYP4A14, CYP4A31, CYP3A41A, CYP4A10, FMO3, CYP39A1, RETSAT, FMO2 | -20                                                 | HSD17B6, NSDHL, PTGR1, CYP2C55, CYP3A16, CYP2B13, CYP1A2, CYB5B, AKR1C20, RDH11, SQLE, HAO2, AOX3                 | 7.97E-15 | 5.32E-12   |
| GO:0016125<br>sterol metabolic process                                  | 2                                                 | LEPR, CYP39A1                                                                     | -9                                                  | SREBF1, CYP51, DHCR7, HMGCS1, MVK, PMVK, SC4MOL, NSDHL, FDFT1                                                     | 2.89E-10 | 1.92E-07   |
| GO:0008610<br>lipid biosynthetic process                                | 3                                                 | CYP17A1, ACACB, CYP39A1                                                           | -14                                                 | CYP51, HSD3B2, HSD3B3, HSD3B5, HMGCS1, PMVK, AKR1C20, FDFT1, SC4MOL, DHCR7, ELOVL3, MVK, FABP5, NSDHL             | 4.02E-10 | 2.68E-07   |
| GO:0016126<br>sterol biosynthetic process                               | 0                                                 |                                                                                   | -8                                                  | CYP51, DHCR7, HMGCS1, MVK, PMVK, SC4MOL, NSDHL, FDFT1                                                             | 2.06E-09 | 1.37E-06   |
| GO:0008203<br>cholesterol metabolic process                             | 2                                                 | LEPR, CYP39A1                                                                     | -8                                                  | SREBF1, CYP51, DHCR7, HMGCS1, MVK, PMVK, NSDHL, FDFT1                                                             | 2.57E-09 | 1.71E-06   |
| GO:0006695<br>cholesterol biosynthetic process                          | 0                                                 |                                                                                   | -7                                                  | CYP51, DHCR7, HMGCS1, MVK, PMVK, NSDHL, FDFT1                                                                     | 1.49E-08 | 9.92E-06   |

| Atg7 <sup>Δ/Δ</sup> ;Fed/Atg7 <sup>Δ/Δ</sup> ;Fasted Comparison | Atg7 <sup>Δ/Δ</sup> ;Fasted Upregulated Genes | Atg7 <sup>Δ/Δ</sup> ;Fasted Upregulated Genes                                                     | Atg7 <sup>Δ/Δ</sup> ;Fasted Downregulated Genes | Atg7 <sup>Δ/Δ</sup> ;Fasted Downregulated Genes                                                                                                                                                                                                                                                                                                            | p-value  | Bonferroni |
|-----------------------------------------------------------------|-----------------------------------------------|---------------------------------------------------------------------------------------------------|-------------------------------------------------|------------------------------------------------------------------------------------------------------------------------------------------------------------------------------------------------------------------------------------------------------------------------------------------------------------------------------------------------------------|----------|------------|
| GO:0006955<br>immune response                                   | 5                                             | CD28, APOA4, GADD45G, IL10, CCL6                                                                  | -29                                             | CXCL1, IFIH1, LST1, TLR1, TLR2, CXCL9, RSAD2, TLR4, IL15, CD74, RAET1A, CXCL10, OASL2, IL1B, LTB, GBP8, IRGM1, GBP6, H2-AB1, PSMB9, SERPINA3G, H2-EB1, H2-AA, CD79B, OAS1A, H2-DMA, GBP3, HSD3B2, HSD3B3, STEAP4, CYP2B9, AKR1C6, CYP7A1, CYP3A41A, NQO1, BDH1, NQO2, CYP3A44, CYP2G1, PTGR1, CYP3A16, CYP2B13, AKR1C20, ALDH1B1, HAO2, DIO1, AKR1D1, BCO2 | 1.29E-12 | 1.94E-09   |
| GO:0055114<br>oxidation reduction                               | 12                                            | CYP4A14, FMO3, CYP4A10, CYP2B10, CYP4A12A, NOX4, PPARGC1A, CYP39A1, RETSAT, FMO2, CYP26A1, CYP2J9 | -21                                             |                                                                                                                                                                                                                                                                                                                                                            | 4.73E-08 | 7.10E-05   |
| GO:0001817<br>regulation of cytokine production                 | 3                                             | INHBB, CD28, IL10                                                                                 | -10                                             | STAT5A, TLR1, TLR2, TLR4, RAET1A, CD83, IRF1, IL1B, LTB, SASH3                                                                                                                                                                                                                                                                                             | 2.89E-06 | 0.004325   |
| GO:0051251<br>positive regulation of lymphocyte activation      | 2                                             | CDKN1A, CD28                                                                                      | -9                                              | CD83, STAT5A, H2-AA, TLR4, IL15, H2-DMA, CD74, SASH3, RAET1A,                                                                                                                                                                                                                                                                                              | 3.02E-06 | 0.004521   |
| GO:0051249<br>regulation of lymphocyte activation               | 3                                             | CDKN1A, CD28, IL10                                                                                | -10                                             | LST1, STAT5A, TLR4, IL15, CD74, RAET1A, CD83, H2-AA, H2-DMA, SASH3                                                                                                                                                                                                                                                                                         | 4.18E-06 | 0.006255   |
| GO:0002696<br>positive regulation of leukocyte activation       | 2                                             | CDKN1A, CD28                                                                                      | -9                                              | CD83, STAT5A, H2-AA, TLR4, IL15, H2-DMA, CD74, SASH3, RAET1A                                                                                                                                                                                                                                                                                               | 4.85E-06 | 0.007246   |
| GO:0050867<br>positive regulation of cell activation            | 2                                             | CDKN1A, CD28                                                                                      | -9                                              | CD83, STAT5A, H2-AA, TLR4, IL15, H2-DMA, CD74, SASH3, RAET1A                                                                                                                                                                                                                                                                                               | 5.81E-06 | 0.008679   |
| GO:0002694<br>regulation of leukocyte activation                | 3                                             | CDKN1A, CD28, IL10                                                                                | -10                                             | LST1, STAT5A, TLR4, IL15, CD74, RAET1A, CD83, H2-AA, H2-DMA, SASH3                                                                                                                                                                                                                                                                                         | 8.37E-06 | 0.01248    |
| GO:0050865<br>regulation of cell activation                     | 3                                             | CDKN1A, CD28, IL10                                                                                | -10                                             | LST1, STAT5A, TLR4, IL15, CD74, RAET1A, CD83, H2-AA, H2-DMA, SASH3                                                                                                                                                                                                                                                                                         | 9.55E-06 | 0.014228   |
