# Supplementary material
Source: PubMed Central journal article supplement (PMC4125614)
Supplement: NIHMS600167-supplement-4.pdf [file NIHMS600167-supplement-4.pdf]

| MUSCLE GO Terms                                                                     |                                              |                                                                                                                                                                                                                                                                                                                                                                                                                                                                                                          |                                                |                                                                                               |          |            |
|-------------------------------------------------------------------------------------|----------------------------------------------|----------------------------------------------------------------------------------------------------------------------------------------------------------------------------------------------------------------------------------------------------------------------------------------------------------------------------------------------------------------------------------------------------------------------------------------------------------------------------------------------------------|------------------------------------------------|-----------------------------------------------------------------------------------------------|----------|------------|
| Atg7 <sup>fllox/fllox</sup> ;Fed/Atg <sup>Δ/Δ</sup> ;Fed Comparison                 | Atg <sup>Δ/Δ</sup> ;Fed Upregulated Genes    | Atg <sup>Δ/Δ</sup> ;Fed Upregulated Genes                                                                                                                                                                                                                                                                                                                                                                                                                                                                | Atg <sup>Δ/Δ</sup> ;Fed Downregulated Genes    | Atg <sup>Δ/Δ</sup> ;Fed Downregulated Genes                                                   | p-value  | Bonferroni |
| GO:0060537<br>muscle tissue development                                             | 3                                            | TIPARP, FOXP1, CSRP3                                                                                                                                                                                                                                                                                                                                                                                                                                                                                     | -9                                             | MEF2C, TNNT2, RXRG, MYOG, PAK1, RARB, CHRNA1, TPM1, TGFB2                                     | 3.03E-06 | 0.00445    |
| GO:0014706<br>striated muscle tissue development                                    | 2                                            | FOXP1, CSRP3                                                                                                                                                                                                                                                                                                                                                                                                                                                                                             | -9                                             | MEF2C, TNNT2, RXRG, MYOG, PAK1, RARB, CHRNA1, TPM1, TGFB2                                     | 1.09E-05 | 0.015959   |
| Atg7 <sup>Δ/Δ</sup> ;Fed/Atg <sup>Δ/Δ</sup> ;Fasted Comparison                      | Atg <sup>Δ/Δ</sup> ;Fasted Upregulated Genes | Atg <sup>Δ/Δ</sup> ;Fasted Upregulated Genes                                                                                                                                                                                                                                                                                                                                                                                                                                                             | Atg <sup>Δ/Δ</sup> ;Fasted Downregulated Genes | Atg <sup>Δ/Δ</sup> ;Fasted Downregulated Genes                                                | p-value  | Bonferroni |
| GO:0009611<br>response to wounding                                                  | 52                                           | CXCL13, MBL2, ORM1, FGB, PLG, CFI, F2, KNG1, FGG, SAA2, FGA, CRP, HC, ARG1, C4BP, SERPINA3N, F9, C8A, AHSG, APOH, ORM2, SERPINA1A, SAA1, SAA4, F13B, SERPINC1, F5, SERPINA1B, C9, CXCL1, SERPINF2, PROC, F12, KLKB1, SLC7A2, MBL1, SERPIND1, ORM3, SAA3, C8B, CD14, F7, MST1, C8G, C2, CXCL10, PPARA, F10, CXCL2, CHI3L3, C3, KLF6                                                                                                                                                                       | -4                                             | CCL21A, CCL8, PF4, EFEMP2                                                                     | 1.70E-20 | 3.73E-17   |
| GO:0002526<br>acute inflammatory response                                           | 26                                           | MBL1, MBL2, C9, C3, CRP, AHSG, SERPINA1B, SAA2, SAA1, SERPINA1A, C2, CFI, HC, SAA3, SAA4, C8G, C8A, ORM1, C8B, SERPINA3N, C4BP, SLC7A2, SERPINF2, F2, ORM2, ORM3                                                                                                                                                                                                                                                                                                                                         | 0                                              |                                                                                               | 5.78E-17 | 2.43E-13   |
| GO:0055114<br>oxidation reduction                                                   | 65                                           | EGLN3, UOX, MOSC1, CYP2E1, HGD, HPD, CYP2D26, CYP2C68, CYP2C70, CYP3A25, PAH, TDO2, RDH7, CYP7B1, CYP2D10, AASS, CYP3A13, CYP2B10, CYP8B1, H6PD, CYP2C29, CYP1A2, CYP2C37, F5, CYP2C50, CYP17A1, CYP2A4, BC089597, CYP3A11, CYP2A12, CYP2F2, CDO1, HSD17B2, DPYD, ALDH8A1, CYP4A10, CYP2C54, KMO, DMGDH, IYD, CYP26A1, CYP2C44, EHHADH, PIPOX, ACOX2, CYP2D22, CP, SC4MOL, POR, HAO1, AKR1C13, FMO2, NOX4, ALDH1L1, ENOX2, SLC25A13, CYP2D9, RDH9, HSD11B1, CYP51, PRODH, PRODH2, SRXN1, CYP4V3, CYP27A1 | -5                                             | SMOX, LOXL1, AOC3, CBR2, GPD2                                                                 | 5.99E-15 | 1.31E-11   |
| GO:0006954<br>inflammatory response                                                 | 34                                           | CXCL13, MBL2, ORM1, CFI, F2, KNG1, SAA2, CRP, HC, C4BP, SERPINA3N, C8A, AHSG, ORM2, SERPINA1A, SAA1, SAA4, SERPINA1B, C9, CXCL1, SERPINF2, KLKB1, SLC7A2, MBL1, ORM3, SAA3, C8B, CD14, C8G, C2, CXCL10, CXCL2, CHI3L3, C3                                                                                                                                                                                                                                                                                | -2                                             | CCL8, CCL21A                                                                                  | 4.05E-13 | 8.87E-10   |
| GO:0007596<br>blood coagulation                                                     | 19                                           | FGB, PLG, F2, KNG1, FGG, FGA, F9, APOH, F13B, SERPINC1, F5, C9, PROC, F12, KLKB1, SERPIND1, F7, MST1, F10                                                                                                                                                                                                                                                                                                                                                                                                | -2                                             | EFEMP2, PF4                                                                                   | 4.33E-13 | 9.47E-10   |
| GO:0050817<br>coagulation                                                           | 19                                           | FGB, PLG, F2, KNG1, FGG, FGA, F9, APOH, F13B, SERPINC1, F5, C9, PROC, F12, KLKB1, SERPIND1, F7, MST1, F10                                                                                                                                                                                                                                                                                                                                                                                                | -2                                             | EFEMP2, PF4                                                                                   | 4.33E-13 | 9.47E-10   |
| GO:0007599<br>hemostasis                                                            | 19                                           | FGB, PLG, F2, KNG1, FGG, FGA, F9, APOH, F13B, SERPINC1, F5, C9, PROC, F12, KLKB1, SERPIND1, F7, MST1, F10                                                                                                                                                                                                                                                                                                                                                                                                | -2                                             | EFEMP2, PF4                                                                                   | 5.82E-13 | 1.27E-09   |
| GO:0006953<br>acute-phase response                                                  | 14                                           | CRP, SAA3, SAA4, AHSG, ORM1, SERPINA3N, SERPINA1B, SAA2, SERPINA1A, SERPINF2, SAA1, F2, ORM2, ORM3                                                                                                                                                                                                                                                                                                                                                                                                       | 0                                              |                                                                                               | 1.35E-11 | 2.94E-08   |
| GO:0050878~<br>regulation of body fluid levels                                      | 19                                           | FGB, PLG, F2, KNG1, FGG, FGA, F9, APOH, F13B, SERPINC1, F5, C9, PROC, F12, KLKB1, SERPIND1, F7, MST1, F10                                                                                                                                                                                                                                                                                                                                                                                                | -2                                             | EFEMP2, PF4                                                                                   | 5.53E-11 | 1.21E-07   |
| GO:0042060<br>wound healing                                                         | 21                                           | FGB, PLG, F2, KNG1, FGG, FGA, F9, APOH, F13B, SERPINC1, F5, C9, PROC, F12, KLKB1, SERPIND1, F7, MST1, PPARA, F10, KLF6                                                                                                                                                                                                                                                                                                                                                                                   | -2                                             | EFEMP2, PF4                                                                                   | 1.00E-10 | 2.19E-07   |
| GO:0009063<br>cellular amino acid catabolic process                                 | 16                                           | AHCY, HAL, FTCD, HGD, AASS, PAH, CDO1, TAT, FAH, AMDHD1, TDO2, PRODH2, DMGDH, UROC1, PRODH, HPD                                                                                                                                                                                                                                                                                                                                                                                                          | 0                                              |                                                                                               | 5.91E-10 | 1.29E-06   |
| GO:0016054<br>organic acid catabolic process                                        | 19                                           | ACOX2, AHCY, EHHADH, HAL, FTCD, HGD, AASS, PAH, CDO1, TAT, FAH, AMDHD1, TDO2, PRODH2, DMGDH, UROC1, SLC27A2, HPD, PRODH                                                                                                                                                                                                                                                                                                                                                                                  | 0                                              |                                                                                               | 6.21E-10 | 1.36E-06   |
| GO:0046395<br>carboxylic acid catabolic process                                     | 19                                           | ACOX2, AHCY, EHHADH, HAL, FTCD, HGD, AASS, PAH, CDO1, TAT, FAH, AMDHD1, TDO2, PRODH2, DMGDH, UROC1, SLC27A2, HPD, PRODH                                                                                                                                                                                                                                                                                                                                                                                  | 0                                              |                                                                                               | 6.21E-10 | 1.36E-06   |
| GO:0009310<br>amine catabolic process                                               | 16                                           | TAT, HGD, HPD, PAH, TDO2, AASS, HAL, CDO1, AHCY, FTCD, UROC1, DMGDH, FAH, AMDHD1, PRODH, PRODH2                                                                                                                                                                                                                                                                                                                                                                                                          | -1                                             | SMOX                                                                                          | 1.12E-09 | 2.46E-06   |
| GO:0006869<br>lipid transport                                                       | 20                                           | APOC3, APOA5, SLC27A5, APOF, APOC1, APOB, APOM, RBP4, APOA1, SLC27A2, NPC1, APOA2, APOC2, APOC4, LIPC, ABCG5, APOA4, LCAT, APOL9A, APOE                                                                                                                                                                                                                                                                                                                                                                  | -1                                             | PITPNC1                                                                                       | 1.22E-08 | 2.68E-05   |
| GO:0008202<br>steroid metabolic process                                             | 23                                           | APOC3, G6PC, SLC27A5, APOF, APOC1, CYP7B1, GC, SAA1, APOA1, NPC1, APOA2, CYP17A1, HMGCS2, HSD17B2, PON1, LIPC, SC4MOL, LCAT, SULT1A1, APOE, RDH9, HSD11B1, CYP51                                                                                                                                                                                                                                                                                                                                         | -1                                             | LEP                                                                                           | 2.44E-08 | 5.34E-05   |
| GO:0010876<br>lipid localization                                                    | 20                                           | APOC3, APOA5, SLC27A5, APOF, APOC1, APOB, APOM, RBP4, APOA1, SLC27A2, NPC1, APOA2, APOC2, APOC4, LIPC, ABCG5, APOA4, LCAT, APOL9A, APOE                                                                                                                                                                                                                                                                                                                                                                  | -1                                             | PITPNC1                                                                                       | 4.38E-08 | 9.58E-05   |
| GO:0006958<br>complement activation, classical pathway                              | 11                                           | MBL1, C8A, MBL2, C8B, C4BP, C9, HC, C3, CFI, C2, C8G                                                                                                                                                                                                                                                                                                                                                                                                                                                     | 0                                              |                                                                                               | 6.56E-08 | 1.44E-04   |
| GO:0009991<br>response to extracellular stimulus                                    | 17                                           | G6PC, APOM, ASL, ASGR1, SERPINC1, HMGCS2, ALDOB, LOC100048662, ALB, ABCG5, EIF2AK4, CP, CBS, PPARA, ANGPTL4, FOXA3, AVPR1A                                                                                                                                                                                                                                                                                                                                                                               | -4                                             | GDAP1, LEP, SFRP2, COL1A1                                                                     | 8.45E-08 | 1.85E-04   |
| GO:0002455<br>humoral immune response mediated by circulating immunoglobulin        | 11                                           | MBL1, C8A, MBL2, C8B, C4BP, C9, HC, C3, CFI, C2, C8G                                                                                                                                                                                                                                                                                                                                                                                                                                                     | 0                                              |                                                                                               | 3.40E-07 | 7.42E-04   |
| GO:0009309<br>amine biosynthetic process                                            | 14                                           | CTH, AGXT, PAH, ASL, ASS1, GLUL, DDC, BHMT2, AGMAT, PNMT, CBS, BHMT, PRODH, PRODH2                                                                                                                                                                                                                                                                                                                                                                                                                       | -1                                             | AMD1                                                                                          | 3.59E-07 | 7.84E-04   |
| GO:0002541<br>activation of plasma proteins involved in acute inflammatory response | 11                                           | MBL1, C8A, MBL2, C8B, C4BP, C9, HC, C3, CFI, C2, C8G                                                                                                                                                                                                                                                                                                                                                                                                                                                     | 0                                              |                                                                                               | 4.55E-07 | 9.94E-04   |
| GO:0006956<br>complement activation                                                 | 11                                           | MBL1, C8A, MBL2, C8B, C4BP, C9, HC, C3, CFI, C2, C8G                                                                                                                                                                                                                                                                                                                                                                                                                                                     | 0                                              |                                                                                               | 4.55E-07 | 9.94E-04   |
| GO:0006952<br>defense response                                                      | 38                                           | CXCL13, MBL2, ORM1, HAMP, CFI, F2, KNG1, SAA2, CRP, HC, C4BP, SERPINA3N, APOM, C8A, AHSG, ORM2, SERPINA1A, SAA1, SAA4, SERPINA1B, C9, CXCL1, SERPINF2, KLKB1, SLC7A2, MBL1, ORM3, SAA3, C8B, CD14, APOA4, C8G, C2, CXCL10, CXCL2, CHI3L3, C3, BNIP3                                                                                                                                                                                                                                                      | -2                                             | CCL8, CCL21A                                                                                  | 5.68E-07 | 0.001241   |
| GO:0016125<br>sterol metabolic process                                              | 14                                           | APOC3, APOF, APOC1, CYP7B1, SAA1, APOA1, APOA2, HMGCS2, PON1, LIPC, SC4MOL, LCAT, APOE, CYP51                                                                                                                                                                                                                                                                                                                                                                                                            | -1                                             | LEP                                                                                           | 7.12E-07 | 0.001555   |
| GO:0009725<br>response to hormone stimulus                                          | 20                                           | SERPINA3K, TAT, FOXO1, AGXT, SERPINA3M, SERPINA3N, ASL, AHSG, SERPINA1A, RBP4, SERPINA1B, IRS2, HMGCS2, ALDOB, LOC100048662, EIF4EBP1, SERPINA1C, HMGB2, GCLC, LCAT                                                                                                                                                                                                                                                                                                                                      | -2                                             | LEP, COL1A1                                                                                   | 7.21E-07 | 0.001575   |
| GO:0031667<br>response to nutrient levels                                           | 15                                           | G6PC, APOM, ASL, SERPINC1, HMGCS2, ALDOB, LOC100048662, ALB, ABCG5, EIF2AK4, CP, CBS, PPARA, ANGPTL4, FOXA3                                                                                                                                                                                                                                                                                                                                                                                              | -3                                             | GDAP1, LEP, COL1A1                                                                            | 1.01E-06 | 0.002209   |
| GO:0008203<br>cholesterol metabolic process                                         | 13                                           | APOC3, APOF, APOC1, CYP7B1, SAA1, APOA1, APOA2, HMGCS2, PON1, LIPC, LCAT, APOE, CYP51                                                                                                                                                                                                                                                                                                                                                                                                                    | -1                                             | LEP                                                                                           | 1.38E-06 | 0.003015   |
| GO:0043434<br>response to peptide hormone stimulus                                  | 14                                           | SERPINA3K, FOXO1, SERPINA3M, SERPINA3N, ASL, AHSG, SERPINA1A, RBP4, SERPINA1B, IRS2, HMGCS2, ALDOB, EIF4EBP1, SERPINA1C                                                                                                                                                                                                                                                                                                                                                                                  | -2                                             | LEP, COL1A1                                                                                   | 1.87E-06 | 0.004084   |
| GO:0006090<br>pyruvate metabolic process                                            | 8                                            | G6PC, AGXT, FBP1, SDS, RBP4, ALDOB, PDK4, ATF3                                                                                                                                                                                                                                                                                                                                                                                                                                                           | -1                                             | GPD2                                                                                          | 2.01E-06 | 0.00438    |
| GO:0008652<br>cellular amino acid biosynthetic process                              | 11                                           | GLUL, CTH, BHMT2, ASS1, BHMT, PRODH2, PAH, ASL, AGXT, CBS, PRODH                                                                                                                                                                                                                                                                                                                                                                                                                                         | 0                                              |                                                                                               | 3.40E-06 | 0.007417   |
| GO:0006959<br>humoral immune response                                               | 12                                           | TRAF3IP2, MBL1, C8A, MBL2, C8B, C4BP, C9, HC, C3, CFI, C2, C8G                                                                                                                                                                                                                                                                                                                                                                                                                                           | 0                                              |                                                                                               | 3.49E-06 | 0.007598   |
| GO:0030198<br>extracellular matrix organization                                     | 4                                            | AGT, LGALS3, VTN, CYR61                                                                                                                                                                                                                                                                                                                                                                                                                                                                                  | -12                                            | RECK, OLFML2B, COL3A1, POSTN, COL5A3, COL5A2, SERPINH1, ABI3BP, COL5A1, KAZALD1, COL11A1, DPT | 4.12E-06 | 0.008962   |
| GO:0009719<br>response to endogenous stimulus                                       | 20                                           | SERPINA3K, TAT, FOXO1, AGXT, SERPINA3M, SERPINA3N, ASL, AHSG, SERPINA1A, RBP4, SERPINA1B, IRS2, HMGCS2, ALDOB, LOC100048662, EIF4EBP1, SERPINA1C, HMGB2, GCLC, LCAT                                                                                                                                                                                                                                                                                                                                      | -2                                             | LEP, COL1A1                                                                                   | 4.28E-06 | 0.009315   |
| GO:0010033<br>response to organic substance                                         | 38                                           | SERPINA3K, TAT, FOXO1, AGXT, SERPINA3M, APCS, PPP1R15A, SERPINA3N, APOM, ASL, AHSG, SERPINA1A, RBP4, SERPINA1B, IRS2, HMGCS2, ALDOB, GLUL, LOC100048662, EIF4EBP1, SERPINA1C, HMGB2, GCLC, ALB, 1100001G20RIK, CD14, EIF2AK4, CYP2D22, MYC, LCAT, HNF4A, EDEM1, ACP5, CREB3L3, APOE, NFKBIA, CYR61, GYS2                                                                                                                                                                                                 | -3                                             | NNAT, LEP, COL1A1                                                                             | 4.35E-06 | 0.009458   |
| GO:0032101<br>regulation of response to external stimulus                           | 13                                           | HRG, PLG, CPB2, AHSG, APOH, NPC1, PROC, F12, KLKB1, SLC7A2, ZFP36, PPARA, C3                                                                                                                                                                                                                                                                                                                                                                                                                             | -3                                             | CCL21A, LEP, BCL6                                                                             | 5.28E-06 | 0.011479   |
| GO:0030193<br>regulation of blood coagulation                                       | 7                                            | F12, KLKB1, APOH, HRG, CPB2, PLG, PROC                                                                                                                                                                                                                                                                                                                                                                                                                                                                   | 0                                              |                                                                                               | 5.69E-06 | 0.012365   |
| GO:0019439<br>aromatic compound catabolic process                                   | 7                                            | TDO2, ALDH1L1, HGD, PAH, TAT, HPD, FAH                                                                                                                                                                                                                                                                                                                                                                                                                                                                   | 0                                              |                                                                                               | 9.19E-06 | 0.019892   |
| GO:0051604<br>protein maturation                                                    | 13                                           | MBL2, CFI, HC, C4BP, AMBP, C8A, C9, MBL1, C8B, MYC, C8G, C2, C3                                                                                                                                                                                                                                                                                                                                                                                                                                          | -2                                             | SERPINH1, PTHLH                                                                               | 1.07E-05 | 0.023062   |
| GO:0030301<br>cholesterol transport                                                 | 8                                            | NPC1, APOB, ABCG5, APOA1, APOE, LCAT, LIPC, APOM                                                                                                                                                                                                                                                                                                                                                                                                                                                         | 0                                              |                                                                                               | 1.30E-05 | 0.028076   |
| GO:0000096<br>sulfur amino acid metabolic process                                   | 8                                            | CTH, BHMT2, AHCY, GCLC, BHMT, GNMT, CDO1, CBS                                                                                                                                                                                                                                                                                                                                                                                                                                                            | 0                                              |                                                                                               | 1.30E-05 | 0.028076   |
| GO:0015918<br>sterol transport                                                      | 8                                            | NPC1, APOB, ABCG5, APOA1, APOE, LCAT, LIPC, APOM                                                                                                                                                                                                                                                                                                                                                                                                                                                         | 0                                              |                                                                                               | 1.30E-05 | 0.028076   |
| GO:0006957<br>complement activation, alternative pathway                            | 6                                            | C8A, C8B, C9, HC, C3, C8G                                                                                                                                                                                                                                                                                                                                                                                                                                                                                | 0                                              |                                                                                               | 1.44E-05 | 0.031079   |
| GO:0009064<br>glutamine family amino acid metabolic process                         | 10                                           | ARG1, AMDHD1, GLUL, GCLC, ASS1, PRODH2, ASL, CPS1, PRODH, FAH                                                                                                                                                                                                                                                                                                                                                                                                                                            | 0                                              |                                                                                               | 2.16E-05 | 0.046095   |
