# Supplementary material
Source: PubMed Central journal article supplement (PMC4125614)
Supplement: NIHMS600167-supplement-5.pdf [file NIHMS600167-supplement-5.pdf]

[illegible]

|                 |             |             |             |            |             |             |             |             |
|-----------------|-------------|-------------|-------------|------------|-------------|-------------|-------------|-------------|
| "1600012F09Rik" | 5.555057133 | 5.808357567 | 5.462684533 | 4.9290915  | 5.742247567 | 5.913960433 | 5.697475667 | 5.7914097   |
| "1600012H06Rik" | 7.66829125  | 8.118965    | 7.75084585  | 8.12749785 | 8.09890635  | 8.319787    | 8.3384444   | 8.2632003   |
| "1600014C10Rik" | 6.4431579   | 6.374938    | 6.43707875  | 6.6165611  | 6.3713435   | 6.15681065  | 6.3311468   | 6.5048884   |
| "160001510Rik"  | 2.4345167   | 2.4183097   | 2.4347029   | 2.3777938  | 2.4396415   | 2.4333706   | 2.414781    | 2.427549    |
| "1600029D21Rik" | 3.1284108   | 3.6156964   | 4.2412653   | 4.730341   | 2.6205726   | 2.5546722   | 2.8224425   | 3.9185638   |
| "1700001C19Rik" | 4.87392175  | 5.839287    | 4.7949811   | 6.3692095  | 5.27842735  | 5.086343    | 5.34218955  | 5.44581315  |
| "1700001F09Rik" | 2.6731305   | 2.6453943   | 2.545249    | 2.594308   | 2.7920976   | 2.7621331   | 2.6482186   | 2.669929    |
| "1700001J03Rik" | 2.95481     | 2.9309087   | 2.8384995   | 2.8417838  | 2.946636    | 2.963032    | 2.901339    | 2.9255772   |
| "1700001K19Rik" | 2.6837718   | 2.6501367   | 2.6080608   | 2.633008   | 2.6760328   | 2.670993    | 2.6535761   | 2.6776414   |
| "1700008F21Rik" | 3.232589    | 3.2620337   | 3.063028    | 3.1374655  | 3.3477206   | 3.3512945   | 3.1811678   | 3.3920765   |
| "1700008P20Rik" | 2.6443918   | 2.627362    | 2.5369668   | 2.6258564  | 2.646926    | 2.6501088   | 2.63341     | 2.6320386   |
| "1700010I14Rik" | 2.7883191   | 2.7710092   | 2.6843408   | 2.69621    | 2.827796433 | 2.804518967 | 2.787642333 | 2.829042733 |
| "1700011A15Rik" | 2.5432239   | 2.7756064   | 2.6433632   | 2.485001   | 2.55888     | 2.5459805   | 2.5628548   | 2.5549371   |
| "1700011H14Rik" | 2.8912616   | 2.8952034   | 2.836927    | 2.849804   | 2.9052675   | 2.9005506   | 2.9102108   | 2.921306    |
| "1700016D06Rik" | 2.5333128   | 2.5035233   | 2.3852475   | 2.452369   | 2.5249467   | 2.5210397   | 2.510638    | 2.5577185   |
| "1700017B05Rik" | 9.024391    | 5.794575    | 5.0253716   | 3.78698    | 5.066062    | 6.574933    | 4.281699    | 4.3675594   |
| "1700018F24Rik" | 2.4200058   | 2.3897455   | 2.3165805   | 2.3437257  | 2.4153085   | 2.4119394   | 2.3952777   | 2.4058697   |
| "1700019G17Rik" | 3.9037659   | 5.21564505  | 5.19507885  | 5.51145935 | 5.4470438   | 5.0506015   | 5.520419    | 6.0113495   |
| "1700019N12Rik" | 2.4129176   | 2.388244    | 2.3161936   | 2.3589394  | 2.4088705   | 2.4026785   | 2.4021118   | 2.3958504   |
| "1700019N19Rik" | 2.623216    | 2.5962412   | 2.5310147   | 2.5577953  | 2.626428    | 2.6247363   | 2.6021974   | 2.6075451   |
| "1700020D05Rik" | 2.3711479   | 2.3484583   | 2.3034492   | 2.3096979  | 2.392607    | 2.3919775   | 2.353256    | 2.3826797   |
| "1700020I14Rik" | 4.9840074   | 4.743907    | 5.511692    | 5.5447564  | 4.84415     | 4.754879    | 5.594655    | 5.105456    |
| "1700021F05Rik" | 7.751794    | 8.21981     | 8.269288    | 8.39358    | 8.315442    | 8.411579    | 8.803138    | 8.630844    |
| "1700023D09Rik" | 2.8864193   | 2.873421    | 2.735178    | 2.8075252  | 2.9757204   | 2.86088     | 2.8626132   | 2.855765    |
| "1700028P14Rik" | 2.899576    | 3.1706505   | 2.8583484   | 3.0035903  | 2.9497886   | 2.9533308   | 2.9336069   | 2.950307    |
| "1700029F12Rik" | 2.6360805   | 2.6116178   | 2.5687194   | 2.5627558  | 2.6399598   | 2.6227818   | 2.6333508   | 2.6557693   |
| "1700029I01Rik" | 4.05441205  | 3.6577542   | 3.7874556   | 3.7103405  | 3.53658125  | 3.59717235  | 3.7305531   | 3.97090135  |
| "1700030K09Rik" | 3.601886    | 3.8740335   | 3.6830442   | 3.5756204  | 3.603403    | 3.752862    | 3.5969625   | 3.6133823   |
| "1700034I23Rik" | 2.6417122   | 2.6175864   | 2.513464    | 2.5576227  | 2.6437213   | 2.6407783   | 2.6194184   | 2.669156    |
| "1700037H04Rik" | 4.445385    | 4.8468537   | 4.7337465   | 4.8383102  | 4.756788    | 4.8594756   | 4.775715    | 5.0149164   |
| "1700040I03Rik" | 6.1784286   | 6.4305305   | 6.453873    | 5.882572   | 5.7427864   | 5.880005    | 5.4984317   | 6.228929    |
| "1700052N19Rik" | 4.64363465  | 4.819157    | 4.3962171   | 4.41273485 | 4.89494385  | 5.38154725  | 4.78040575  | 4.76918305  |
| "1700054O13Rik" | 2.3748667   | 2.344788    | 2.2808008   | 2.3129888  | 2.3665328   | 2.3665104   | 2.353011    | 2.3631115   |
| "1700065I17Rik" | 2.9861948   | 2.986402    | 2.8814538   | 2.8663964  | 3.0532293   | 2.9892962   | 2.9340458   | 2.9754329   |
| "1700071K01Rik" | 8.3252522   | 8.82450375  | 8.64346885  | 8.7644336  | 8.790774    | 8.67065765  | 8.74228865  | 8.87616125  |
| "1700073E17Rik" | 2.64006285  | 2.6130124   | 2.50644615  | 2.55841575 | 2.69882045  | 2.64999995  | 2.60497695  | 2.62513475  |
| "1700074P13Rik" | 2.431459    | 2.40833     | 2.355083    | 2.3560379  | 2.4277723   | 2.4224021   | 2.4204752   | 2.4239998   |
| "1700080E11Rik" | 2.53959     | 2.5351698   | 2.4598353   | 2.5130682  | 2.544342    | 2.59717     | 2.5282202   | 2.5383089   |
| "1700082M22Rik" | 2.660305    | 2.636175    | 2.536034    | 2.596459   | 2.6627302   | 2.6613767   | 2.6556034   | 2.6800022   |
| "1700093K21Rik" | 2.3936737   | 2.3643966   | 2.3013067   | 2.3322248  | 2.3882997   | 2.3821867   | 2.3820765   | 2.3763936   |
| "1700094D03Rik" | 4.7292438   | 4.8854055   | 4.817098    | 4.848131   | 5.0216146   | 4.951932    | 4.7556214   | 4.950543    |
| "1700094J05Rik" | 2.9829035   | 2.9710994   | 2.8725026   | 2.9135215  | 3.0223773   | 2.9829926   | 2.9198296   | 2.977677    |
| "1700097N02Rik" | 2.4871438   | 2.4646962   | 2.4106903   | 2.418449   | 2.4843469   | 2.4811113   | 2.483453    | 2.4690053   |
| "1700102P08Rik" | 2.7388394   | 2.7287967   | 2.6032379   | 2.6586545  | 2.7446234   | 2.7694983   | 2.7126353   | 2.7705944   |
| "1700120B22Rik" | 2.5700092   | 2.5410273   | 2.4513502   | 2.4899716  | 2.5697446   | 2.560299    | 2.5506377   | 2.5655894   |
| "1700123K08Rik" | 3.0155933   | 3.0090392   | 2.8907762   | 2.9329631  | 3.067062    | 3.0318832   | 2.9710886   | 3.1116538   |
| "1700123O20Rik" | 9.311107    | 9.437308    | 9.481032    | 9.124353   | 9.399262    | 9.654992    | 9.051871    | 9.043552    |
| "1700129C05Rik" | 2.488216    | 2.458032    | 2.373581    | 2.421954   | 2.4868681   | 2.4832244   | 2.4676807   | 2.4781559   |
| "1810006K21Rik" | 2.656896    | 3.7050767   | 3.5045533   | 3.7549071  | 5.0348444   | 4.7766857   | 3.61671     | 4.3312993   |
| "1810008A18Rik" | 6.548448    | 6.5245304   | 6.0978947   | 6.5645666  | 6.9539795   | 6.9210715   | 6.2422295   | 6.4836464   |
| "1810009A15Rik" | 7.936832    | 8.109404    | 8.418694    | 8.1788645  | 7.6934376   | 8.006139    | 7.9987555   | 7.849462    |
| "1810009N02Rik" | 3.300667    | 3.26176     | 3.3157685   | 3.2669876  | 3.0998616   | 3.457065    | 2.9883213   | 3.2693112   |
| "1810011O10Rik" | 9.619194    | 8.962403    | 8.283996    | 8.339817   | 10.15581    | 8.514003    | 9.285712    | 8.874402    |
| "1810014F10Rik" | 8.319445    | 7.9455667   | 8.126169    | 7.412406   | 7.4257164   | 8.034899    | 8.030373    | 8.044739    |
| "1810019J16Rik" | 6.1690025   | 7.176412    | 5.9652305   | 6.053153   | 6.2687135   | 5.92557     | 6.9335074   | 6.3657126   |
| "1810020D17Rik" | 7.306607    | 8.416823    | 7.960323    | 8.943543   | 8.896195    | 7.9920597   | 8.20597     | 8.758238    |
| "1810021B22Rik" | 4.716398    | 4.810801    | 4.237984    | 4.1957254  | 5.2872925   | 4.7000384   | 4.7017474   | 4.6974325   |
| "1810026J23Rik" | 6.3518205   | 6.30223685  | 5.9562991   | 6.1855733  | 6.58280525  | 6.176503    | 6.2703895   | 6.4033118   |
| "1810029B16Rik" | 5.3702679   | 5.16730605  | 4.95765945  | 4.7125956  | 4.9637519   | 5.1293492   | 4.86622275  | 4.81643365  |
| "1810030J14Rik" | 2.4129848   | 2.3869483   | 2.3732624   | 2.3427255  | 2.4086318   | 2.403515    | 2.399772    | 2.4188197   |
| "1810030N24Rik" | 7.721676    | 8.550749    | 8.284967    | 8.790399   | 8.287516    | 8.621023    | 8.276835    | 8.297173    |
| "1810030O07Rik" | 4.9464418   | 4.4572365   | 4.5071675   | 4.48132505 | 4.50870265  | 4.4963051   | 4.45333325  | 4.5481125   |
| "1810031K17Rik" | 8.765836    | 8.388135    | 7.9994206   | 8.508686   | 8.14973     | 9.445624    | 8.011052    | 8.503943    |
| "1810032O08Rik" | 3.0221965   | 2.3473177   | 2.294876    | 2.308065   | 2.367865    | 2.364293    | 2.3733995   | 2.3531961   |
| "1810035L17Rik" | 9.1486225   | 9.5941305   | 9.994787    | 9.68166    | 9.3403635   | 9.1525135   | 9.749483    | 9.583924    |
| "1810037I17Rik" | 7.946305    | 7.9855      | 8.453348    | 8.229485   | 7.7163196   | 7.673634    | 8.115347    | 8.048527    |
| "1810043G02Rik" | 3.8950622   | 3.68590555  | 3.6674906   | 3.6616584  | 3.50975595  | 3.69622725  | 3.8813362   | 3.6676373   |
| "1810044D09Rik" | 4.049729    | 5.3248734   | 4.5949225   | 4.952056   | 4.920429    | 5.2523484   | 4.389205    | 4.8778524   |
| "1810046J19Rik" | 8.748167    | 8.634911    | 9.230946    | 9.371504   | 8.977921    | 9.006054    | 9.275236    | 9.125065    |
| "1810048J11Rik" | 2.8389063   | 2.9950473   | 2.9483407   | 3.4177647  | 3.0259151   | 2.9024665   | 3.2810218   | 3.070138    |
| "1810049H13Rik" | 5.8672323   | 6.6388564   | 6.352741    | 7.117801   | 6.578919    | 6.5449195   | 7.093793    | 6.927245    |
| "1810055G02Rik" | 9.7140665   | 8.95095     | 6.2097054   | 5.840317   | 7.9546914   | 7.436216    | 6.5654526   | 6.092075    |
| "1810058I24Rik" | 9.651418    | 9.53374     | 10.479547   | 10.612221  | 10.1477375  | 9.339374    | 10.529564   | 10.354012   |
| "1810063B05Rik" | 6.6649152   | 7.112706    | 6.8513808   | 6.627111   | 6.7697336   | 6.5886587   | 6.7433156   | 6.3437315   |
| "1810063B07Rik" | 7.326863    | 7.36609     | 6.8538613   | 6.5812936  | 6.5087385   | 7.6275268   | 6.964481    | 7.202533    |
| "1810065E05Rik" | 2.9278436   | 2.9088643   | 2.8173804   | 2.8693557  | 2.9158103   | 2.9069784   | 2.9067516   | 2.9642556   |
| "2010001E11Rik" | 8.2019205   | 8.98741     | 8.315789    | 7.9293528  | 9.0230465   | 8.948255    | 8.751836    | 8.875112    |
| "2010001M06Rik" | 3.1181087   | 3.0807858   | 2.9718904   | 3.03244    | 3.1125107   | 3.1451852   | 3.0799005   | 3.0886798   |
| "2010003K11Rik" | 3.7230036   | 5.4910173   | 5.314404    | 5.44351    | 6.007089    | 6.865314    | 6.4719863   | 5.442895    |
| "2010003O02Rik" | 7.802959    | 8.305299    | 7.9907756   | 8.015213   | 8.15603     | 8.012724    | 8.005705    | 7.793658    |
| "2010010I01Rik" | 2.4339314   | 2.420648    | 2.386553    | 2.3716645  | 2.4389582   | 2.432993    | 2.4350824   | 2.4281368   |

|                 |             |             |             |             |             |             |             |             |
|-----------------|-------------|-------------|-------------|-------------|-------------|-------------|-------------|-------------|
| "2010011I20Rik" | 8.315668    | 9.113676667 | 8.372091    | 8.407729333 | 8.574634667 | 8.546996667 | 8.538482433 | 8.246800333 |
| "2010012O05Rik" | 7.717184    | 8.423556    | 7.5864477   | 7.675003    | 7.807803    | 7.563962    | 7.164356    | 7.1888795   |
| "2010106E10Rik" | 2.7504287   | 3.3179638   | 2.6293488   | 2.6570597   | 2.795774    | 2.7543883   | 2.711957    | 2.77288     |
| "2010106G01Rik" | 10.513738   | 10.115821   | 10.44510967 | 10.17885033 | 9.558481    | 10.01731133 | 9.498968667 | 9.977603667 |
| "2010107E04Rik" | 10.33013    | 10.843435   | 10.737447   | 10.77327    | 10.750101   | 10.7278595  | 10.822523   | 10.914288   |
| "2010107G23Rik" | 3.297421    | 3.5047588   | 4.9530735   | 4.1214805   | 3.2525947   | 2.9548047   | 4.4827657   | 3.2372344   |
| "2010109K11Rik" | 6.1601796   | 6.5038266   | 7.384862    | 7.0735183   | 6.71366     | 6.980844    | 7.125353    | 6.630836    |
| "2010111I01Rik" | 7.006639    | 7.2684105   | 6.4929209   | 6.62183     | 6.7672815   | 7.1218842   | 6.094341    | 6.57042475  |
| "2010204K13Rik" | 2.5654216   | 2.5294232   | 2.4771824   | 2.4880478   | 2.5596228   | 2.6149764   | 2.5483098   | 2.8136744   |
| "2010305A19Rik" | 7.759116    | 8.20782     | 8.200941    | 7.709083    | 7.745331    | 7.6484137   | 7.633885    | 7.9432225   |
| "2010321M09Rik" | 5.7369466   | 5.918689    | 6.333942    | 6.2189064   | 6.3042607   | 6.1734667   | 6.346768    | 6.0524325   |
| "2210010C04Rik" | 3.0399362   | 3.11258555  | 2.913846    | 2.97835515  | 3.0529432   | 3.04183365  | 2.89563595  | 3.04055765  |
| "2210012G02Rik" | 4.9317284   | 4.992154    | 4.920361    | 5.076152    | 5.284132    | 5.012696    | 4.969515    | 4.7365046   |
| "2210016F16Rik" | 6.7754155   | 6.9976658   | 7.03494785  | 7.0225935   | 6.855632    | 6.9535953   | 7.12431365  | 6.927725    |
| "2210016L21Rik" | 4.911596    | 5.881929    | 5.1022997   | 5.3311067   | 4.916233    | 5.228401    | 4.965271    | 5.188468    |
| "2210018M11Rik" | 6.747374    | 6.7097282   | 6.623106    | 6.6270323   | 6.8764744   | 6.968503    | 6.743348    | 6.9531064   |
| "2210021J22Rik" | 4.0712514   | 4.0169883   | 3.9888124   | 3.9987438   | 4.0354323   | 4.114382    | 4.0360537   | 4.002715    |
| "2210407C18Rik" | 2.5254323   | 2.5841112   | 2.4623234   | 2.4436839   | 2.517641    | 2.537194    | 2.49554     | 2.4963665   |
| "2210409E12Rik" | 2.8380591   | 2.820384    | 2.7184833   | 2.7599646   | 2.8507023   | 2.86616515  | 2.8129511   | 2.86590465  |
| "2210418O10Rik" | 4.10874     | 3.9206486   | 3.66191     | 4.0298653   | 3.947072    | 3.8525224   | 4.3092732   | 3.8670244   |
| "2310001A20Rik" | 6.33951585  | 6.5520485   | 6.355172    | 6.454627    | 6.548743    | 6.535275    | 6.4577833   | 6.455055    |
| "2310002J15Rik" | 2.3126292   | 2.2990122   | 2.264431    | 2.2763686   | 2.3182602   | 2.37696     | 2.3021667   | 2.308112    |
| "2310003F16Rik" | 6.44353685  | 6.575027    | 6.4919636   | 6.4674315   | 6.3766828   | 6.5552039   | 6.595975    | 6.5756119   |
| "2310003L22Rik" | 4.011245    | 3.88046     | 5.3234158   | 5.2223973   | 3.8710933   | 4.2691174   | 5.7388086   | 5.171179    |
| "2310004I24Rik" | 7.9993353   | 8.148442    | 8.089062    | 8.734844    | 8.3113785   | 8.524044    | 8.26128     | 8.868041    |
| "2310004N24Rik" | 3.6404762   | 3.9268622   | 3.3924131   | 3.4078627   | 3.4074936   | 2.4976804   | 3.103106    | 3.3725991   |
| "2310008H04Rik" | 6.014106    | 3.9007316   | 4.671296    | 5.0970592   | 4.014362    | 5.325212    | 4.8236976   | 4.8095107   |
| "2310008H09Rik" | 5.78409085  | 5.54470015  | 5.8701764   | 5.96036585  | 6.0449595   | 5.955981    | 5.77444935  | 6.0978142   |
| "2310010I17Rik" | 6.0096483   | 6.601108    | 6.4686484   | 6.447691    | 6.492251    | 6.2693515   | 6.622711    | 6.531712    |
| "2310011J03Rik" | 5.5067034   | 5.4817524   | 5.6229215   | 5.5291395   | 5.563101    | 5.496056    | 5.9984574   | 5.59307     |
| "2310014L17Rik" | 6.0648036   | 3.0309718   | 3.3091378   | 3.094134    | 2.887457    | 3.5460997   | 4.6393766   | 3.2620423   |
| "2310016M24Rik" | 9.313598    | 9.596592    | 9.658051    | 9.615604    | 9.210462    | 9.417461    | 9.439827    | 9.3329315   |
| "2310022A10Rik" | 3.3882813   | 3.6599429   | 3.624021    | 3.8435977   | 3.6796837   | 3.9796882   | 3.683132    | 3.6641417   |
| "2310030G06Rik" | 8.015432    | 7.960124    | 8.080212    | 7.8209934   | 7.798404    | 7.4787955   | 7.7967772   | 8.245061    |
| "2310031A07Rik" | 2.565757    | 2.5268385   | 2.5019238   | 2.4976947   | 2.5590274   | 2.5577152   | 2.548151    | 2.5455527   |
| "2310033P09Rik" | 6.475772    | 6.8026514   | 6.7240605   | 6.3822093   | 6.700808    | 6.4664354   | 6.668408    | 6.6444182   |
| "2310034C09Rik" | 2.9582787   | 2.927946    | 2.8075557   | 2.8468409   | 2.9859686   | 2.9848816   | 2.940125    | 2.9833865   |
| "2310035K24Rik" | 5.2568069   | 4.6057288   | 4.67686435  | 4.57199165  | 4.68009185  | 4.89576475  | 4.5203254   | 4.6719321   |
| "2310036O22Rik" | 9.826646    | 9.685918    | 9.591673    | 9.085638    | 9.324459    | 9.79625     | 9.329646    | 9.551134    |
| "2310039H08Rik" | 10.194608   | 10.910449   | 10.446331   | 10.115725   | 10.958752   | 10.996434   | 10.951859   | 10.54704    |
| "2310044G10Rik" | 5.136611633 | 6.221761667 | 5.461379833 | 5.9348168   | 6.217575533 | 6.278699733 | 5.8293761   | 5.958173567 |
| "2310044H10Rik" | 9.25161     | 9.223679    | 9.121298    | 9.172768    | 9.354062    | 9.410654    | 9.143067    | 9.025776    |
| "2310047B19Rik" | 2.4148874   | 2.7224276   | 2.6470087   | 3.2711022   | 2.6821723   | 2.6705792   | 2.6755621   | 2.6505063   |
| "2310061C15Rik" | 5.8077061   | 6.013993667 | 6.104121767 | 6.190892233 | 6.196506367 | 6.434124167 | 6.1723446   | 6.100193767 |
| "2310061I04Rik" | 8.199402    | 8.836999    | 7.9146303   | 8.4374575   | 8.237778    | 8.79007165  | 8.3911115   | 8.634724    |
| "2310061J03Rik" | 4.4335413   | 5.330925    | 4.1342783   | 3.957107    | 4.814617    | 4.6479654   | 4.077278    | 3.8471394   |
| "2310067B10Rik" | 3.1135938   | 3.1402187   | 3.0928442   | 3.0927157   | 3.20644     | 3.1255095   | 3.1048782   | 3.1105922   |
| "2310075K07Rik" | 2.9728642   | 3.1463425   | 3.1503704   | 2.8964634   | 3.1695206   | 3.1466022   | 3.1780171   | 3.164285    |
| "2400001E08Rik" | 8.691318    | 9.0121599   | 9.322330433 | 9.137288    | 9.0630297   | 8.9836919   | 9.183386    | 9.26665     |
| "2400003C14Rik" | 8.7688599   | 8.5179232   | 8.2683422   | 8.467698    | 8.24748935  | 8.2390455   | 8.286027    | 8.19911535  |
| "2410001C21Rik" | 7.52920915  | 8.5079945   | 7.491424    | 7.66180275  | 8.487051    | 8.12750425  | 7.9922765   | 7.95097335  |
| "2410002F23Rik" | 6.346348    | 5.8321705   | 4.788935    | 5.2756796   | 5.169468    | 5.0904293   | 5.420058    | 5.320348    |
| "2410002I01Rik" | 2.3720973   | 2.332972    | 2.2870524   | 2.3268774   | 2.3524573   | 2.6618028   | 2.3505015   | 2.339683    |
| "2410002O22Rik" | 5.8525443   | 6.3028493   | 6.4257956   | 6.4450383   | 6.347792    | 6.6738358   | 6.556475    | 6.468399    |
| "2410004B18Rik" | 8.279207    | 7.4372034   | 7.710541    | 7.302275    | 7.306789    | 7.3265285   | 7.340062    | 6.966133    |
| "2410015M20Rik" | 6.4583278   | 6.7553346   | 6.7074221   | 6.72225815  | 6.6097304   | 6.62844065  | 6.61103535  | 6.72207615  |
| "2410016O06Rik" | 6.993077    | 6.0340514   | 5.921834    | 5.6660075   | 6.5171847   | 6.3663154   | 6.0421324   | 5.6147923   |
| "2410017P09Rik" | 7.6146035   | 7.732768    | 7.6066713   | 7.58882     | 7.5213428   | 7.4695225   | 7.2253013   | 7.477905    |
| "2410018L13Rik" | 2.557953    | 2.5249279   | 2.430686    | 2.497048    | 2.5442803   | 2.5432081   | 2.5393696   | 2.5310526   |
| "2410018M08Rik" | 11.398893   | 11.838152   | 11.37194    | 11.484701   | 11.716875   | 11.798236   | 11.476147   | 11.451345   |
| "2410022L05Rik" | 4.314822433 | 3.882039667 | 4.707439233 | 3.822554133 | 3.3313853   | 4.068073933 | 4.018188567 | 4.156827133 |
| "2410042D21Rik" | 5.128338    | 4.727025    | 5.0577407   | 4.2906303   | 4.632346    | 4.198116    | 4.7423444   | 4.6918335   |
| "2410075B13Rik" | 2.5220082   | 2.5123806   | 2.4836802   | 2.4768443   | 2.5255044   | 2.515933    | 2.5316072   | 2.5144768   |
| "2410091C18Rik" | 5.853645    | 6.238078    | 7.28665     | 6.7214246   | 6.805115    | 6.453126    | 6.9755707   | 6.750338    |
| "2410133F24Rik" | 3.0659018   | 3.0709546   | 2.9724333   | 3.0260973   | 3.146865    | 3.1119738   | 3.0692136   | 3.1222694   |
| "2500003M10Rik" | 8.423964    | 8.14887975  | 8.361474    | 8.01294165  | 8.07409     | 8.0345378   | 8.3991864   | 8.13984085  |
| "2510002D24Rik" | 6.053372    | 6.693553    | 6.6416225   | 6.956124    | 6.315112    | 6.612332    | 7.0413613   | 7.3273435   |
| "2510009E07Rik" | 7.7733173   | 6.706214    | 7.7967453   | 7.367684    | 7.259504    | 6.907414    | 7.598935    | 6.722697    |
| "2510039O18Rik" | 8.05099525  | 7.224275    | 6.85721635  | 7.21074     | 7.16073155  | 7.30999715  | 7.57524     | 7.05152265  |
| "2600001M11Rik" | 4.8788414   | 5.2143598   | 5.536555    | 5.1778493   | 5.9777937   | 5.2484937   | 5.1024737   | 4.989203    |
| "2610001J05Rik" | 5.6058749   | 5.2585969   | 5.622624    | 5.6215553   | 5.4924451   | 5.61339185  | 5.825022    | 5.70078075  |
| "2610002J02Rik" | 6.9290937   | 7.060308767 | 7.482982367 | 7.03966     | 6.799478533 | 7.228088667 | 6.9932703   | 6.8050917   |
| "2610002M06Rik" | 5.3441358   | 5.7549753   | 6.0982027   | 5.4685254   | 5.70049     | 5.4153905   | 5.7044134   | 5.817239    |
| "2610005L07Rik" | 5.592890433 | 5.214189633 | 5.111923967 | 5.1337749   | 5.044624267 | 5.2289865   | 5.2026091   | 5.217245267 |
| "2610018G03Rik" | 4.054356    | 2.77422835  | 3.75377655  | 3.06947995  | 2.8368117   | 2.7739217   | 3.00629575  | 2.544089    |
| "2610019E17Rik" | 3.0374777   | 3.0348234   | 2.945397    | 2.933334    | 3.768544    | 3.091374    | 2.999219    | 3.1399646   |
| "2610019F03Rik" | 6.4718847   | 7.2238855   | 6.5608177   | 6.460479    | 7.1606636   | 6.5115666   | 6.808777    | 7.029531    |
| "2610020H08Rik" | 2.7557607   | 2.73069     | 2.6246605   | 2.692383    | 2.761047    | 3.110575    | 2.7306345   | 2.7989998   |
| "2610027L16Rik" | 6.8093786   | 6.95376     | 6.5903234   | 6.6046605   | 6.783098    | 6.915921    | 6.506963    | 6.6243653   |
| "2610029G23Rik" | 7.4311256   | 6.5590143   | 7.5376363   | 6.4323215   | 6.686865    | 6.4180226   | 6.9456997   | 6.5536075   |
| "2610039C10Rik" | 5.2476165   | 4.7662763   | 5.26515725  | 5.1048428   | 4.6603595   | 4.86549355  | 5.17475625  | 4.85529805  |

|                 |             |             |             |             |             |             |             |             |
|-----------------|-------------|-------------|-------------|-------------|-------------|-------------|-------------|-------------|
| "2610042L04Rik" | 2.7057493   | 2.6692362   | 2.647401    | 2.6584668   | 2.6921911   | 2.684391    | 2.6696205   | 2.7271457   |
| "2610101N10Rik" | 7.48431565  | 7.87799235  | 7.8604135   | 7.708468    | 7.63007645  | 7.7453715   | 7.9972785   | 7.7713312   |
| "2610201A13Rik" | 4.406058    | 5.181291    | 4.2121887   | 4.1194327   | 4.42604925  | 4.3217735   | 4.15993905  | 4.367291    |
| "2610301B20Rik" | 5.750568    | 5.3984113   | 5.146042    | 5.3614936   | 4.5729394   | 5.2113557   | 5.36567     | 4.991717    |
| "2610301G19Rik" | 5.789163    | 5.933901    | 6.5067234   | 6.2702303   | 5.9150734   | 6.086899    | 6.282818    | 5.8030415   |
| "2610507B11Rik" | 7.47672975  | 7.73820475  | 7.765903    | 8.16965475  | 7.746732    | 7.128481    | 7.789833    | 7.6974654   |
| "2610524H06Rik" | 2.2363732   | 2.189501    | 2.3228927   | 2.1797323   | 2.2198231   | 2.2099879   | 2.27099     | 2.204123    |
| "2610528A11Rik" | 2.4058359   | 2.3865952   | 2.3264976   | 2.3444319   | 2.4054756   | 2.3935614   | 2.395039    | 2.3852777   |
| "2610528J11Rik" | 2.999219    | 3.7232203   | 3.7728326   | 3.9945586   | 3.5625541   | 3.7559316   | 4.829779    | 3.819881    |
| "2700007P21Rik" | 5.629785    | 5.5430677   | 5.48150165  | 5.74244     | 5.8454792   | 6.02081875  | 5.53761585  | 5.6356945   |
| "2700029M09Rik" | 5.943061    | 6.609822    | 7.805766    | 7.4268265   | 6.6268206   | 6.614969    | 7.822763    | 7.7429175   |
| "2700050L05Rik" | 6.8578076   | 6.7260013   | 6.0055184   | 6.6316805   | 7.310705    | 7.156916    | 6.858545    | 7.1301084   |
| "2700060E02Rik" | 11.45477867 | 11.63208333 | 11.37818733 | 11.22105033 | 11.22305483 | 11.26644667 | 11.03110767 | 11.115789   |
| "2700062C07Rik" | 5.3285456   | 5.999517    | 4.531862    | 5.053436    | 4.9653893   | 5.275948    | 5.2760077   | 5.062818    |
| "2700078E11Rik" | 4.680389083 | 4.8258622   | 5.058387467 | 4.8622959   | 4.8508043   | 5.055201583 | 4.949420333 | 5.205386    |
| "2700079J08Rik" | 8.771923    | 8.799091    | 9.098264    | 9.27407     | 9.022151    | 9.120942    | 8.984599    | 8.7885475   |
| "2700089E24Rik" | 8.42059925  | 8.60422     | 8.2720365   | 8.6248025   | 8.7600315   | 8.58593     | 9.281927    | 8.813614    |
| "2700094K13Rik" | 7.0866966   | 7.5677195   | 7.9823112   | 8.00463     | 7.716095    | 7.2238927   | 7.7527504   | 7.989456    |
| "2700097O09Rik" | 5.516169    | 5.627143    | 5.718784    | 5.6045876   | 5.6510077   | 5.9700937   | 5.632613    | 5.258695    |
| "2700099C18Rik" | 3.472588    | 3.4896054   | 3.2630706   | 3.358869    | 3.644353    | 3.5765743   | 3.3637214   | 3.6851428   |
| "2810002D19Rik" | 3.3202198   | 3.918593    | 4.4180174   | 5.2025356   | 3.8971202   | 4.660472    | 4.9430428   | 3.9222686   |
| "2810004N23Rik" | 7.7856345   | 8.288407    | 8.810125    | 8.062861    | 7.312439    | 8.167911    | 8.198917    | 8.147744    |
| "2810021B07Rik" | 4.381541    | 4.5099754   | 4.3487105   | 4.324357    | 4.242126    | 4.323406    | 4.42478     | 4.3671756   |
| "2810025M15Rik" | 5.365549    | 5.115647    | 6.0796556   | 5.5882792   | 5.3948245   | 5.611928    | 5.5084915   | 5.4125586   |
| "2810040C05Rik" | 3.9115422   | 3.985668    | 3.6254623   | 3.8680687   | 4.0743575   | 3.987544    | 3.830208    | 3.9958634   |
| "2810043O03Rik" | 4.556375    | 4.9898443   | 4.683793    | 4.7691355   | 4.8811436   | 4.3649416   | 5.0718317   | 4.6526237   |
| "2810046L04Rik" | 3.2849576   | 2.6157947   | 2.2795267   | 2.4879577   | 2.8945687   | 2.6272633   | 2.78921     | 2.6669986   |
| "2810055F11Rik" | 7.1310067   | 7.7401395   | 7.7769403   | 8.323901    | 8.461397    | 8.355453    | 8.371675    | 8.448942    |
| "2810403A07Rik" | 7.1547728   | 8.408587    | 8.04183     | 7.8253064   | 8.725462    | 8.892176    | 8.288696    | 8.032254    |
| "2810405K02Rik" | 7.1121964   | 7.053156    | 7.757615    | 7.6613955   | 7.7825794   | 7.3447323   | 7.6797633   | 7.944228    |
| "2810407C02Rik" | 10.936223   | 10.8046055  | 11.420178   | 11.255569   | 11.083586   | 10.984145   | 11.1612835  | 11.286095   |
| "2810408B13Rik" | 3.303216    | 3.3192945   | 3.2116294   | 3.1918511   | 3.4675977   | 3.3762102   | 3.3221483   | 3.407602    |
| "2810408M09Rik" | 3.51883165  | 3.32643365  | 3.22366365  | 3.09722365  | 3.3719202   | 3.28160105  | 3.28813875  | 3.3062527   |
| "2810417H13Rik" | 2.86923325  | 2.8072773   | 3.27414225  | 2.90996535  | 2.8776368   | 2.91627415  | 2.9294707   | 2.9522563   |
| "2810422J05Rik" | 14.284685   | 14.465893   | 14.424754   | 14.375378   | 14.357848   | 14.372791   | 14.210931   | 14.44199    |
| "2810422O20Rik" | 4.1370687   | 3.5986533   | 4.4723907   | 4.2587914   | 4.485833    | 4.971429    | 4.944447    | 4.2403665   |
| "2810428I15Rik" | 6.7061024   | 7.467579    | 7.8428173   | 7.8730574   | 7.35763     | 7.2498426   | 7.7023067   | 7.6880546   |
| "2810432D09Rik" | 7.6764812   | 7.641944    | 7.6120105   | 7.1737657   | 7.6860156   | 7.877388    | 7.6505303   | 7.239007    |
| "2810449G22Rik" | 2.2755733   | 2.2367575   | 2.2135196   | 2.2236714   | 2.4669008   | 2.250038    | 2.265253    | 2.244661    |
| "2810453J06Rik" | 4.8516003   | 4.46871525  | 4.79282405  | 5.1924614   | 4.71671135  | 4.55010855  | 4.6766783   | 4.30878965  |
| "2810459M11Rik" | 6.726921    | 8.068951    | 7.9913535   | 7.9377356   | 7.413713    | 7.9418087   | 7.9610147   | 8.631073    |
| "2810474O19Rik" | 7.599838133 | 6.5774924   | 6.385949933 | 6.525447467 | 6.575556233 | 6.454739233 | 6.2304946   | 7.288309667 |
| "2900010M23Rik" | 7.002378    | 7.6684055   | 8.0586405   | 7.92365025  | 7.57396485  | 7.5518863   | 7.86653325  | 7.791378    |
| "2900053A13Rik" | 5.2851286   | 5.52664525  | 5.58148265  | 5.9839095   | 5.4710786   | 5.2697734   | 5.607441    | 5.6575129   |
| "2900064A13Rik" | 6.18616925  | 6.385433    | 6.2011001   | 6.2965591   | 6.4370721   | 6.45914615  | 6.22877275  | 6.329625    |
| "2900092E17Rik" | 5.936926533 | 5.7080036   | 5.8773542   | 5.873378633 | 5.830188033 | 6.299671267 | 5.7256581   | 5.904220233 |
| "2900097C17Rik" | 6.97703065  | 7.24235635  | 6.9864665   | 6.9738989   | 7.04635325  | 7.06764     | 6.9621026   | 6.98631565  |
| "3000002C10Rik" | 11.6447     | 12.493912   | 11.96604    | 12.275376   | 12.695667   | 12.508879   | 11.913624   | 12.187591   |
| "3010026O09Rik" | 3.9013824   | 3.727753    | 4.9254475   | 4.2834835   | 3.2594533   | 3.287902    | 4.7767177   | 5.047679    |
| "3110001D03Rik" | 8.7804365   | 9.32594     | 9.174266    | 9.388513    | 8.940864    | 9.048723    | 9.003701    | 9.062809    |
| "3110002H16Rik" | 4.4025594   | 4.5600839   | 4.5012621   | 4.69636285  | 4.6766849   | 4.8309434   | 4.8319317   | 4.9020715   |
| "3110003A17Rik" | 9.095566    | 8.430533    | 9.47482     | 8.747856    | 8.090031    | 8.588431    | 8.91185     | 8.621088    |
| "3110007F17Rik" | 2.653384    | 2.6202888   | 2.5369      | 2.5736673   | 2.6477401   | 2.6431236   | 2.6341376   | 2.6393533   |
| "3110009E18Rik" | 3.2293887   | 3.544514    | 4.0851526   | 3.2129912   | 3.0941787   | 3.396883    | 3.7320073   | 3.3893516   |
| "3110040N11Rik" | 5.3357925   | 5.9815726   | 6.3671646   | 6.7006073   | 5.736912    | 5.7478757   | 6.140657    | 6.0260706   |
| "3110043O21Rik" | 12.024319   | 8.033472    | 7.9493055   | 7.8437395   | 7.304345    | 8.87986     | 7.080853    | 7.6587467   |
| "3110053B16Rik" | 2.4641964   | 2.43151     | 2.361947    | 2.3684678   | 2.4492424   | 2.4460096   | 2.4293582   | 2.447214    |
| "3110056O03Rik" | 4.7042727   | 4.912402    | 5.028158    | 4.892609    | 5.1608825   | 5.2706504   | 4.9395223   | 4.9193387   |
| "3110057O12Rik" | 4.750679    | 4.9352992   | 4.8675788   | 5.30429765  | 4.9781648   | 5.0591985   | 5.3478342   | 4.9810282   |
| "3110070M22Rik" | 3.2432833   | 3.633374    | 3.0632951   | 3.3543746   | 3.2991216   | 3.3034472   | 3.029815    | 3.2852643   |
| "3200002M19Rik" | 6.6008632   | 6.27047025  | 6.9307859   | 6.8550675   | 6.2422943   | 6.37596845  | 6.8297962   | 6.65198755  |
| "3230401D17Rik" | 10.377658   | 9.142255    | 9.00151     | 9.08341     | 9.264243    | 9.683744    | 9.171523    | 9.14951     |
| "3632451O06Rik" | 2.6051733   | 2.6034284   | 2.5112326   | 2.5421576   | 2.6061862   | 2.5967076   | 2.5859444   | 2.6022174   |
| "3830403N18Rik" | 4.1286592   | 3.6945271   | 3.5495007   | 3.571806    | 3.7388904   | 3.8431656   | 3.7016888   | 3.73899     |
| "3830406C13Rik" | 7.0439425   | 7.428142    | 7.8580112   | 7.8839793   | 7.2202363   | 7.5396347   | 7.986235    | 7.741636    |
| "4632415L05Rik" | 3.1895454   | 3.24027315  | 2.92458965  | 3.1693464   | 3.20150495  | 3.2598386   | 3.30126765  | 3.24076735  |
| "4632419J22Rik" | 6.8455653   | 7.500767    | 8.086906    | 8.111332    | 7.6256895   | 7.406529    | 8.177597    | 7.9772034   |
| "4632428N05Rik" | 5.382348    | 4.61964225  | 5.47703055  | 4.7215439   | 4.65237665  | 5.29871465  | 4.6877539   | 4.4305831   |
| "4732418C07Rik" | 7.170298    | 7.0320764   | 7.449476    | 7.340936    | 7.1873646   | 7.15435     | 7.26324     | 7.0234666   |
| "4732471D19Rik" | 4.4986345   | 4.438547    | 3.683927667 | 4.113326433 | 4.284429867 | 4.492386167 | 4.191283267 | 4.732840033 |
| "4833420G11Rik" | 6.38463495  | 7.3791375   | 6.9436285   | 7.1139324   | 7.4005793   | 6.67910315  | 7.41799115  | 7.23359535  |
| "4833420G17Rik" | 8.203725333 | 8.216664567 | 7.296060967 | 7.291935833 | 7.9352427   | 8.388290333 | 7.436004667 | 7.856492    |
| "4833439L19Rik" | 9.741829    | 10.19891    | 9.551725    | 10.12184    | 10.42784    | 9.935599    | 10.030561   | 10.214814   |
| "4833441D16Rik" | 4.6639338   | 3.374569    | 2.8681674   | 2.706577    | 3.1886415   | 2.9935956   | 3.11514     | 3.2010512   |
| "4833442J19Rik" | 9.831964    | 10.728311   | 8.482317    | 8.14604     | 9.736056    | 11.940242   | 7.9692903   | 10.102839   |
| "4921510H08Rik" | 2.4316187   | 2.4221628   | 2.2741518   | 2.3933315   | 2.4350147   | 2.4208345   | 2.4271479   | 2.6160495   |
| "4921524J17Rik" | 8.595821    | 7.510589    | 7.0994987   | 7.4245377   | 7.5032983   | 7.8380995   | 7.256682    | 7.3793616   |
| "4921530L21Rik" | 2.7352011   | 2.720217    | 2.6047132   | 2.6527877   | 2.7547996   | 2.7806041   | 2.7139003   | 2.7500317   |
| "4921536K21Rik" | 2.4643981   | 2.463186    | 2.377071    | 2.432811    | 2.498394    | 2.5086145   | 2.4733222   | 2.474484    |
| "4922502D21Rik" | 2.897064    | 2.868666    | 2.779202    | 2.847957    | 2.8994644   | 2.8963099   | 2.8763776   | 2.9572065   |
| "4930403N07Rik" | 2.876694    | 2.9284427   | 2.7351139   | 2.8055525   | 3.1766524   | 2.9591792   | 2.865365    | 2.9187171   |

|                 |             |             |             |             |             |             |             |             |
|-----------------|-------------|-------------|-------------|-------------|-------------|-------------|-------------|-------------|
| "4930420K17Rik" | 11.168345   | 11.868699   | 10.779379   | 11.624852   | 11.295679   | 11.400006   | 10.974569   | 11.219549   |
| "4930430A15Rik" | 2.4553986   | 2.42986     | 2.3637922   | 2.3882363   | 2.451892    | 2.4504235   | 2.444311    | 2.447636    |
| "4930430F08Rik" | 3.1689312   | 2.8079047   | 2.733285    | 2.7834668   | 2.830162    | 3.1030183   | 3.304799    | 2.8241796   |
| "4930432F04Rik" | 2.2797556   | 2.0142174   | 2.2730398   | 2.2545023   | 2.9741776   | 2.2780476   | 2.3063593   | 2.262505    |
| "4930433N12Rik" | 2.7157063   | 2.6989408   | 2.6152773   | 2.6335833   | 2.7315166   | 2.7328846   | 2.6841028   | 2.7260935   |
| "4930441O14Rik" | 2.7268221   | 2.6925645   | 2.6133835   | 2.6727343   | 2.7402637   | 2.7180183   | 2.7164018   | 2.7126644   |
| "4930444A02Rik" | 3.90572665  | 3.8839201   | 3.9931299   | 3.97551905  | 4.06446025  | 3.8666543   | 4.69118025  | 3.9724712   |
| "4930453N24Rik" | 5.022426975 | 5.2142932   | 5.020026225 | 4.966090875 | 4.874078125 | 4.805916025 | 4.918774875 | 4.876662625 |
| "4930455C21Rik" | 5.7823462   | 6.103805    | 6.674408    | 6.6112895   | 6.216784    | 6.5600486   | 6.832478    | 6.687456    |
| "4930471M23Rik" | 5.29517935  | 5.0834478   | 4.795605    | 4.81445385  | 4.71674395  | 4.80300915  | 4.38455225  | 4.37390975  |
| "4930507D05Rik" | 2.5487132   | 2.5830139   | 2.4461841   | 2.4897195   | 2.54758865  | 2.57048085  | 2.51285875  | 2.4665566   |
| "4930520O04Rik" | 2.3788517   | 2.351193    | 2.3056207   | 2.3288224   | 2.3763905   | 2.3718195   | 2.3690984   | 2.3547728   |
| "4930525F21Rik" | 3.414874    | 3.3939583   | 3.206767    | 3.3157005   | 3.4330828   | 3.4919176   | 3.3769035   | 3.5616636   |
| "4930535I16Rik" | 2.8663056   | 2.8380344   | 2.7858598   | 2.8101082   | 2.9760265   | 2.8631701   | 2.8547487   | 2.8509498   |
| "4930547C10Rik" | 2.7372503   | 2.7138867   | 2.5979853   | 2.6833086   | 2.7378407   | 2.7459126   | 2.6978917   | 2.7531607   |
| "4930549C01Rik" | 2.9397504   | 2.9593914   | 2.8174312   | 2.853848    | 2.9510758   | 2.932687    | 2.872026    | 2.967266    |
| "4930571B16Rik" | 2.7201588   | 2.6924744   | 2.6046805   | 2.6708643   | 2.7765553   | 2.7657843   | 2.7094831   | 2.68794     |
| "4930579C15Rik" | 2.5476439   | 2.52922105  | 2.4561045   | 2.4702078   | 2.56799915  | 2.54610045  | 2.5318924   | 2.5415326   |
| "4931406C07Rik" | 9.6370345   | 9.9675885   | 10.532915   | 11.0778145  | 10.8153795  | 9.53582     | 11.4038095  | 11.1549615  |
| "4931408A02Rik" | 2.8358421   | 2.4813402   | 2.4253821   | 2.4366553   | 2.505424    | 2.5060856   | 2.474281    | 2.489363    |
| "4931432E15Rik" | 2.8970542   | 2.8855424   | 2.7564952   | 2.7984886   | 2.918591    | 2.9392202   | 2.854241    | 2.9448142   |
| "4932416H05Rik" | 2.569464    | 2.544419    | 2.483581    | 2.5249484   | 2.6774533   | 2.5592883   | 2.5400999   | 2.552243    |
| "4932431P20Rik" | 8.658786    | 8.471576    | 8.1521435   | 8.364941    | 8.626742    | 8.554583    | 9.152825    | 8.596617    |
| "4932438A13Rik" | 8.6988535   | 8.463561    | 7.9549303   | 7.9864817   | 8.280724    | 8.439704    | 8.800409    | 8.468573    |
| "4933400A11Rik" | 2.8417892   | 2.853598    | 2.690955    | 2.797676    | 2.859188    | 2.8669786   | 2.8372927   | 2.8998263   |
| "4933407C03Rik" | 8.11350895  | 7.8625892   | 7.3825457   | 7.638026    | 8.00802435  | 7.850016    | 7.575453    | 7.47273365  |
| "4933411K20Rik" | 5.223192    | 5.593828    | 5.4119277   | 5.632032    | 5.934509    | 5.7418485   | 5.841335    | 5.6545863   |
| "4933413G19Rik" | 2.3883874   | 2.3559823   | 2.2861247   | 2.317036    | 2.382306    | 2.4019322   | 2.364365    | 2.3739214   |
| "4933417A18Rik" | 2.5650525   | 2.5398712   | 2.4776073   | 2.5090942   | 2.5649436   | 2.616983    | 2.5515769   | 2.557112    |
| "4933421I07Rik" | 2.42406     | 2.3950276   | 2.3198721   | 2.3570251   | 2.418364    | 2.414753    | 2.4119701   | 2.4075155   |
| "4933424B01Rik" | 6.611812    | 6.527014    | 6.465235    | 6.37516495  | 6.71665965  | 6.60606195  | 6.747914    | 7.00942265  |
| "4933425L06Rik" | 2.627254    | 2.603288    | 2.5371015   | 2.545349    | 2.6277509   | 2.6241322   | 2.619352    | 2.6278358   |
| "4933426M11Rik" | 8.023975    | 7.9505014   | 7.6934714   | 7.7279243   | 7.5581346   | 8.044945    | 6.950641    | 7.064244    |
| "4933428G20Rik" | 2.5499241   | 2.5162396   | 2.4630215   | 2.491246    | 2.538047    | 2.5277555   | 2.5355392   | 2.5284083   |
| "4933429H19Rik" | 2.7051408   | 2.683196    | 2.5796878   | 2.6229424   | 2.7038434   | 2.696428    | 2.7060535   | 2.8238344   |
| "4933434E20Rik" | 7.7417068   | 8.452682    | 8.0178102   | 8.2524452   | 8.01280285  | 8.27374615  | 8.0683753   | 8.0461905   |
| "4933434I20Rik" | 2.63869355  | 2.61623905  | 2.53873575  | 2.59012405  | 2.63920425  | 2.6299884   | 2.62598365  | 2.62102305  |
| "4933436I01Rik" | 2.8108337   | 2.847137    | 2.6850488   | 2.7311924   | 2.8371572   | 2.8405654   | 2.7722466   | 2.8478396   |
| "4933439F18Rik" | 4.615481817 | 4.498209217 | 4.161316817 | 4.404933533 | 4.766776417 | 4.588130133 | 4.7163903   | 4.614339383 |
| "5031439G07Rik" | 4.39715     | 5.222927    | 4.447576    | 4.7543488   | 4.7112646   | 4.7056823   | 5.1453547   | 4.957226    |
| "5033411D12Rik" | 6.597996    | 7.4313674   | 5.9898343   | 5.910571    | 6.3544583   | 6.345318    | 6.4538803   | 6.897891    |
| "5033414D02Rik" | 6.1437073   | 5.6922283   | 7.441081    | 7.0002956   | 6.002598    | 5.6325974   | 6.614611    | 6.093619    |
| "5330417C22Rik" | 2.5200226   | 2.4910488   | 2.477347    | 2.4858952   | 2.518244    | 2.507659    | 2.4989235   | 2.5102284   |
| "5430407P10Rik" | 2.3306162   | 2.2987828   | 2.2135406   | 2.470243    | 2.3109438   | 2.2899542   | 2.315578    | 2.299087    |
| "5430417L22Rik" | 6.4053226   | 6.670147    | 5.9548526   | 5.7102585   | 6.5839725   | 6.494525    | 6.17787     | 6.057405    |
| "5430421N21Rik" | 3.2076838   | 3.2043107   | 3.1163914   | 3.1581821   | 3.2122943   | 3.20261     | 3.2186003   | 3.2898142   |
| "5430435G22Rik" | 3.7771269   | 2.68495155  | 3.6823629   | 3.0260304   | 2.6907418   | 2.8521246   | 2.78103935  | 2.45909965  |
| "5430437P03Rik" | 7.96991     | 8.590829    | 8.41879     | 8.821264    | 8.543486    | 8.329598    | 8.523325    | 8.96233     |
| "5730403B10Rik" | 8.0628638   | 8.4784608   | 7.0509035   | 7.53861715  | 8.25107175  | 8.335009    | 7.29380215  | 7.2502131   |
| "5730408K05Rik" | 3.5184203   | 3.74427785  | 3.5089598   | 3.4339238   | 3.8379585   | 4.27216415  | 3.570248    | 3.5846738   |
| "5730469M10Rik" | 9.985482    | 10.098109   | 10.286682   | 10.241661   | 10.390425   | 10.080703   | 11.02248    | 10.66928    |
| "5730494M16Rik" | 3.4499898   | 3.8004007   | 4.826305    | 5.5480976   | 4.40239     | 4.043429    | 5.8897414   | 5.1416807   |
| "5730494N06Rik" | 9.279501    | 9.833435    | 9.816461    | 9.825273    | 9.710015    | 9.836887    | 9.858896    | 9.64419     |
| "5730528L13Rik" | 2.5786345   | 2.5456548   | 2.5016289   | 2.498712    | 2.593004    | 2.5694332   | 2.5576115   | 2.5955844   |
| "5830411I07Rik" | 2.934787    | 2.9547784   | 2.8016515   | 2.8374987   | 3.004117    | 3.0182977   | 2.8223433   | 3.2131839   |
| "5830417I10Rik" | 3.1377766   | 3.1149418   | 3.0830986   | 3.097146    | 3.129806    | 3.124689    | 3.1387632   | 3.0711122   |
| "5830433M19Rik" | 6.1285563   | 5.8615985   | 5.3930817   | 5.771154    | 5.559087    | 6.2757907   | 6.6475325   | 5.905294    |
| "5930416I19Rik" | 5.70488     | 6.150717    | 6.320607    | 6.169387    | 6.0675354   | 6.666463    | 6.0267234   | 6.2635016   |
| "6030458C11Rik" | 4.3177719   | 4.74426425  | 4.69531095  | 4.61833385  | 4.5237922   | 4.47095395  | 4.49044685  | 4.58762885  |
| "6330406I15Rik" | 2.83951915  | 2.8220501   | 2.78266895  | 2.75444465  | 2.87108275  | 2.8525754   | 2.8070265   | 2.86588265  |
| "6330408A02Rik" | 3.4577732   | 3.4121237   | 3.2978222   | 3.350479    | 3.4696615   | 3.565093    | 3.428695    | 4.0183697   |
| "6330409N04Rik" | 7.667835    | 7.6051865   | 7.5848827   | 7.2885456   | 6.698974    | 7.312944    | 7.3190074   | 7.14304     |
| "6330416G13Rik" | 4.011254833 | 4.242893633 | 4.827444767 | 4.059418167 | 4.0904082   | 3.9186132   | 4.426179333 | 3.8791838   |
| "6330509M05Rik" | 2.8309064   | 2.8147736   | 2.7863894   | 2.767851    | 2.8378038   | 2.8936954   | 2.9226177   | 2.863798    |
| "6330512M04Rik" | 2.5157762   | 2.4619167   | 2.4302454   | 2.4509282   | 2.540637    | 2.4719331   | 2.4938276   | 2.466994    |
| "6330578E17Rik" | 8.6330931   | 9.4279245   | 8.7062213   | 8.77504075  | 8.8154075   | 8.8902408   | 8.53050825  | 8.75963165  |
| "6430548M08Rik" | 3.252405    | 3.2385588   | 3.421855    | 3.4275234   | 3.4447536   | 3.129305    | 2.9834886   | 3.145008    |
| "6430706D22Rik" | 4.440320067 | 4.8939581   | 5.222297333 | 5.4622716   | 5.5022168   | 4.786037267 | 5.980551633 | 5.844594933 |
| "6720456B07Rik" | 10.2781665  | 10.209658   | 10.1561835  | 10.2283775  | 10.1748895  | 10.2026415  | 10.160808   | 10.082286   |
| "6720456H20Rik" | 3.5213428   | 3.5056214   | 3.4740014   | 3.469318    | 3.5259192   | 3.5257533   | 3.530762    | 3.521983    |
| "6720475J19Rik" | 2.784045    | 2.8027344   | 2.932009    | 2.5943935   | 2.6220887   | 2.410116    | 2.5661047   | 2.4992473   |
| "6820431F20Rik" | 5.722335    | 4.996461    | 4.8317018   | 5.1584105   | 4.95949     | 4.80459     | 5.1372843   | 5.425719    |
| "8030411F24Rik" | 2.4782023   | 2.448678    | 2.3948221   | 2.4026432   | 2.4710913   | 2.4636688   | 2.467179    | 2.456376    |
| "8430406I07Rik" | 3.6013072   | 3.5696774   | 3.7468865   | 3.7256749   | 4.5444      | 4.3573956   | 4.9989204   | 4.7416954   |
| "8430410A17Rik" | 5.284776    | 5.099491    | 5.447507    | 4.8958097   | 5.0342474   | 5.507456    | 5.551042    | 5.377645    |
| "8430410K20Rik" | 7.976342    | 8.211949    | 8.1863165   | 8.072047    | 8.162091    | 8.255688    | 8.192812    | 7.865139    |
| "8430419L09Rik" | 4.705103433 | 4.124435567 | 3.971947367 | 4.141720833 | 4.241152067 | 3.670901233 | 3.947217733 | 4.274311533 |
| "9030425E11Rik" | 3.1071255   | 3.0735748   | 4.8057375   | 3.7075355   | 2.7303333   | 3.065071    | 3.0592442   | 2.9582903   |
| "9030617O03Rik" | 5.80442     | 7.1226897   | 7.631881    | 7.651526    | 7.6039014   | 6.9678373   | 7.408657    | 7.376379    |
| "9030624J02Rik" | 5.3398379   | 5.1112164   | 5.72263135  | 5.50750555  | 5.3132121   | 5.6595046   | 5.544482    | 5.5389214   |
| "9130004C02Rik" | 3.7015657   | 3.7171261   | 3.6973462   | 3.6921844   | 3.7450461   | 3.7713459   | 3.7389088   | 3.7929842   |

|                 |             |             |             |             |             |             |             |             |
|-----------------|-------------|-------------|-------------|-------------|-------------|-------------|-------------|-------------|
| "9130011J15Rik" | 6.800254033 | 6.77048     | 6.4855319   | 6.739346567 | 6.591687067 | 6.566154433 | 6.7497219   | 6.6054889   |
| "9130017N09Rik" | 2.4092433   | 2.5163882   | 2.2983186   | 2.3425727   | 2.3784528   | 2.3960004   | 2.3777428   | 2.4575598   |
| "9130019O22Rik" | 5.2917404   | 5.76313     | 5.8856535   | 5.4783316   | 5.76081     | 5.8844833   | 5.2692766   | 5.195702    |
| "9130221H12Rik" | 5.109938    | 5.651969    | 5.820724    | 6.3274074   | 6.243252    | 6.1306806   | 5.881149    | 6.1109066   |
| "9130401M01Rik" | 8.453859    | 8.746552    | 7.7190824   | 7.75152     | 8.237795    | 8.677942    | 8.198278    | 8.00021     |
| "9430015G10Rik" | 3.1876445   | 3.1684024   | 3.0405567   | 3.10644     | 3.2176723   | 3.1953645   | 3.1569593   | 3.2164137   |
| "9430016H08Rik" | 8.91576     | 9.148902    | 8.87855     | 8.875204    | 8.891232    | 8.803039    | 9.0442915   | 9.001362    |
| "9430023L20Rik" | 6.4957666   | 6.633578    | 6.203       | 6.569923    | 7.02427     | 6.9809294   | 7.28626     | 6.9346633   |
| "9530002B09Rik" | 2.4399662   | 2.4153383   | 2.3736956   | 2.3816082   | 2.439981    | 2.4323876   | 2.4302585   | 2.424643    |
| "9530008L14Rik" | 9.4866495   | 10.607476   | 9.369308    | 10.46962    | 10.454584   | 10.596584   | 10.4639225  | 10.845642   |
| "9530068E07Rik" | 6.6732615   | 6.56382035  | 6.5872835   | 6.57212685  | 6.5246586   | 6.5323068   | 6.45179325  | 6.7113373   |
| "9930105H17Rik" | 3.7907934   | 4.764436    | 4.762018    | 4.577461    | 3.8608139   | 3.8072248   | 4.9212704   | 4.0741944   |
| "a"             | 2.572144    | 2.5585      | 2.500856    | 2.4309978   | 2.5547395   | 2.5502367   | 2.5294147   | 2.581482    |
| "A030009H04Rik" | 2.701947    | 2.6684131   | 2.6375016   | 2.63656005  | 2.7554133   | 2.7637933   | 2.69471405  | 2.68374635  |
| "A130006I12Rik" | 2.5487487   | 2.5308213   | 2.613545    | 2.4847944   | 2.5851638   | 2.5565212   | 2.5206823   | 2.5886314   |
| "A130040M12Rik" | 13.341258   | 12.478287   | 11.636052   | 11.285827   | 11.881083   | 12.265942   | 11.418471   | 11.269781   |
| "A230006K03Rik" | 2.6170398   | 2.5913657   | 2.4859892   | 2.5373185   | 2.61711085  | 2.6114943   | 2.5886849   | 2.61383105  |
| "A230046K03Rik" | 6.332171133 | 5.949981133 | 6.526391633 | 6.584741667 | 6.140195533 | 6.664985533 | 6.542790733 | 6.255558667 |
| "A230050P20Rik" | 7.0217285   | 8.063236    | 8.001812    | 8.384031    | 7.738251    | 8.377196    | 7.8533144   | 7.97306     |
| "A2Id1"         | 8.460868    | 9.295131    | 8.278868    | 8.869131    | 8.905476    | 8.581782    | 8.854834    | 9.045124    |
| "A2m"           | 3.122659    | 2.5370457   | 2.3769333   | 2.4325538   | 2.5596807   | 2.558737    | 2.5197325   | 2.5479786   |
| "A330033J07Rik" | 2.5435925   | 2.5201905   | 2.4391925   | 2.4713585   | 2.6145086   | 2.5312512   | 2.543043    | 2.5248172   |
| "A330049M08Rik" | 2.4272542   | 2.9104714   | 2.2673366   | 3.355105    | 2.5869951   | 2.3331172   | 3.195684    | 2.3794816   |
| "A430005L14Rik" | 9.637484    | 9.757075    | 9.018462    | 9.356105    | 9.5416155   | 9.791658    | 9.198586    | 9.285426    |
| "A430104N18Rik" | 4.5481615   | 3.7883244   | 3.8165798   | 3.8474724   | 3.8165314   | 3.961999    | 3.920825    | 3.801288    |
| "A4galt"        | 2.7808008   | 2.7584498   | 2.729858    | 2.7394257   | 2.847082    | 2.7825243   | 2.755703    | 2.7665231   |
| "A530016L24Rik" | 2.393438    | 2.7328467   | 2.3290455   | 2.2944472   | 2.3853297   | 2.3751001   | 2.3851957   | 2.3708138   |
| "A530058N18Rik" | 3.2290683   | 3.2436035   | 3.062353    | 3.1169019   | 3.3462603   | 3.3209403   | 3.158846    | 3.339263    |
| "A630007B06Rik" | 6.898076    | 6.7528095   | 6.55373     | 6.6085615   | 6.8975067   | 6.7190256   | 6.72036     | 6.2471247   |
| "A630038E17Rik" | 2.7258508   | 2.6900976   | 2.578708    | 2.6767766   | 2.722431    | 2.7005415   | 2.7044058   | 2.717269    |
| "A630072M18Rik" | 5.533362    | 5.824561    | 5.272969    | 5.1685457   | 5.5762653   | 5.3013673   | 5.2923303   | 5.2357745   |
| "A730098P11Rik" | 12.0529915  | 11.85165113 | 11.82099675 | 11.92094288 | 11.62612875 | 11.61502375 | 11.8021025  | 11.91261475 |
| "A830007P12Rik" | 3.0800765   | 3.5691686   | 5.2640176   | 4.28924     | 3.8612761   | 4.0723248   | 4.677664    | 3.598455    |
| "A930001N09Rik" | 6.6249317   | 7.21449075  | 6.438842    | 6.9790752   | 6.615288    | 7.44325     | 6.5184603   | 7.2238165   |
| "A930012O16Rik" | 2.3826582   | 3.4483745   | 2.3055706   | 2.3295333   | 2.3748457   | 2.367884    | 2.3691533   | 2.3591344   |
| "AA407107"      | 2.8618512   | 2.8791018   | 2.8333473   | 2.8042455   | 2.6042356   | 2.8663626   | 3.2059443   | 3.5049267   |
| "AA407331"      | 3.9890392   | 3.917446    | 3.766264    | 4.03274595  | 3.9521156   | 4.25833075  | 3.999345    | 4.1303557   |
| "AA408650"      | 5.913858    | 7.0289984   | 5.967521    | 5.9924374   | 6.2630734   | 5.4208593   | 5.673882    | 5.6453586   |
| "AA408954"      | 2.4561706   | 2.4280224   | 2.3485217   | 2.384035    | 2.4532666   | 2.48632     | 2.4437485   | 2.4423056   |
| "AA409749"      | 3.48802735  | 2.82665335  | 2.6504011   | 2.76814545  | 2.87362115  | 2.896755    | 2.8005855   | 2.83358565  |
| "AA414903"      | 2.736968    | 2.7111363   | 2.6059902   | 2.6472085   | 2.742426    | 2.7421498   | 2.7083452   | 2.7434344   |
| "AA414993"      | 2.7840108   | 2.76037985  | 2.6491398   | 2.7050525   | 2.80854365  | 2.8017363   | 2.75859605  | 2.81170485  |
| "AA416453"      | 3.4458447   | 3.5099192   | 3.3963413   | 3.494213    | 3.5298603   | 3.5657413   | 3.3432736   | 3.606462    |
| "AA511261"      | 2.4636946   | 2.4303455   | 2.3249754   | 2.3601418   | 2.4618363   | 2.454362    | 2.4291916   | 2.4368334   |
| "AA516738"      | 2.5457802   | 2.5192227   | 2.4929514   | 2.5074484   | 2.550944    | 2.5497277   | 2.5394      | 2.5451047   |
| "AA517023"      | 2.9585562   | 2.95556405  | 2.806763    | 2.861756    | 3.00932505  | 3.0383676   | 2.93462755  | 3.03022495  |
| "AA517545"      | 3.4232187   | 3.452238    | 3.223517    | 3.317141    | 3.6309016   | 3.5996919   | 3.332573    | 3.6873865   |
| "AA517562"      | 2.905777    | 2.8853712   | 2.7460275   | 2.8073466   | 2.9318159   | 2.9319606   | 2.8654974   | 2.9073985   |
| "AA517650"      | 2.5830529   | 2.5616245   | 2.4693732   | 2.5438213   | 2.8407602   | 2.5824845   | 2.5590827   | 2.5682497   |
| "AA517841"      | 2.41575095  | 2.38109725  | 2.3091435   | 2.35046125  | 2.417528    | 2.3989686   | 2.3974725   | 2.39191165  |
| "AA517858"      | 2.98760615  | 2.99848195  | 2.88855825  | 2.93170785  | 3.03562985  | 3.02708725  | 2.973889    | 3.0318254   |
| "AA517864"      | 2.5413117   | 2.5205784   | 2.42279     | 2.4907053   | 2.5379643   | 2.534645    | 2.4993334   | 2.526744    |
| "AA522020"      | 2.94004575  | 2.91951085  | 2.79777705  | 2.84737315  | 2.9796896   | 3.0042541   | 2.90460945  | 2.9965515   |
| "AA536748"      | 3.0922852   | 3.1321845   | 3.026258    | 3.0242534   | 3.10975     | 3.2309947   | 3.0852108   | 3.1916525   |
| "AA672641"      | 2.7255      | 2.7001565   | 2.6116757   | 2.650178    | 2.7285259   | 2.7274306   | 2.6959362   | 2.727269    |
| "AA675344"      | 2.8729559   | 2.8481195   | 2.73881615  | 2.78903325  | 2.90110375  | 2.88157295  | 2.8442325   | 2.8837534   |
| "AA960436"      | 4.333613    | 4.3054214   | 4.58009     | 4.3992486   | 4.3158994   | 4.221162    | 4.2902355   | 4.3035903   |
| "Aaas"          | 3.7229009   | 3.348468    | 3.6797652   | 3.6027446   | 3.7110116   | 3.7193608   | 3.8038177   | 3.7040458   |
| "Aacs"          | 4.10304225  | 5.8453297   | 7.09606215  | 5.09246735  | 6.6207148   | 4.36755575  | 4.2504355   | 6.6975513   |
| "Aadac"         | 11.280247   | 11.3929615  | 12.067799   | 12.222961   | 12.207672   | 11.901578   | 12.318323   | 12.481331   |
| "Aadat"         | 8.833157    | 11.098947   | 9.467932    | 10.325007   | 10.462226   | 10.673758   | 10.16322    | 10.666629   |
| "Aagab"         | 5.55014255  | 5.3242357   | 5.530108    | 5.5901853   | 5.82469215  | 5.41598915  | 5.892431    | 5.79152105  |
| "Aak1"          | 4.981776733 | 5.1610044   | 4.933976033 | 4.9689082   | 5.326009733 | 5.303902167 | 4.880804567 | 5.0871005   |
| "Aamp"          | 7.8834844   | 8.34779     | 7.752944    | 8.052617    | 8.024814    | 8.195262    | 7.577787    | 8.05687     |
| "Aard"          | 3.0401924   | 3.0264654   | 3.1746316   | 3.3809564   | 3.504602    | 3.165298    | 5.1571245   | 3.288753    |
| "Aars"          | 8.99449275  | 9.1839845   | 9.276847    | 9.28614475  | 9.6161175   | 9.4231955   | 9.2468765   | 9.327725    |
| "Aarsd1"        | 5.9824786   | 7.7412376   | 6.7135587   | 7.2573376   | 7.135369    | 7.142292    | 7.26937     | 7.540691    |
| "Aass"          | 13.581467   | 13.185098   | 12.425186   | 12.409453   | 12.591029   | 13.408231   | 12.732322   | 12.609495   |
| "Aatf"          | 6.8482494   | 7.0456433   | 6.606527    | 6.7998457   | 6.6831346   | 7.2751694   | 6.786372    | 6.887859    |
| "AB041803"      | 8.73046     | 7.0652337   | 7.1194267   | 7.2088833   | 6.5317097   | 7.504262    | 6.3979335   | 7.5833416   |
| "AB099516"      | 7.7580204   | 8.515464    | 8.309452    | 9.208889    | 8.381811    | 8.303943    | 8.182413    | 8.823298    |
| "Abat"          | 9.912613    | 11.479498   | 11.313947   | 11.621577   | 11.238589   | 10.667546   | 11.5674715  | 11.204003   |
| "Abca1"         | 7.197866533 | 6.345422867 | 6.570970467 | 6.296225667 | 6.203031833 | 6.280125867 | 6.352955367 | 6.2598238   |
| "Abca2"         | 2.6982994   | 2.7033906   | 2.836744    | 2.711883    | 2.748324    | 2.739645    | 2.701307    | 2.9072125   |
| "Abca3"         | 5.303986033 | 5.0770684   | 5.993889    | 5.907637567 | 6.0586849   | 5.6784718   | 6.379706933 | 5.914873067 |
| "Abca7"         | 2.9500675   | 2.675204    | 2.763237    | 2.80776     | 2.8079774   | 2.666835    | 2.8059382   | 2.6440072   |
| "Abca8a"        | 9.80687     | 8.9752865   | 9.443183    | 10.587121   | 8.999946    | 7.9407387   | 10.289885   | 11.250992   |
| "Abca8b"        | 6.439601    | 5.0939875   | 6.207479    | 6.538141    | 5.613798    | 6.373389    | 6.7756815   | 6.994125    |
| "Abcb10"        | 5.81043835  | 6.1297818   | 6.141052    | 6.19003365  | 5.7918458   | 5.77882685  | 6.20819835  | 6.8601637   |
| "Abcb11"        | 10.164683   | 9.596365    | 11.060408   | 11.445146   | 11.102964   | 10.85528    | 11.920878   | 11.884667   |
| "Abcb1a"        | 3.7221086   | 3.08941385  | 5.3044088   | 5.24518655  | 5.18849285  | 3.76150015  | 6.57822735  | 6.1142272   |

|           |             |             |             |             |             |             |             |             |
|-----------|-------------|-------------|-------------|-------------|-------------|-------------|-------------|-------------|
| "Abcb1b"  | 3.1066372   | 3.9216666   | 2.9273968   | 3.0918918   | 3.6820016   | 3.3653367   | 2.8975894   | 3.1239321   |
| "Abcb4"   | 10.607869   | 11.272179   | 10.099328   | 10.72736    | 11.921924   | 12.123756   | 11.069925   | 11.298102   |
| "Abcb6"   | 9.704862    | 9.961562    | 9.850286    | 10.036248   | 10.417037   | 10.6562195  | 10.55155    | 10.417855   |
| "Abcb7"   | 5.578870467 | 6.360782667 | 6.115176033 | 6.329278467 | 5.8117302   | 5.990237833 | 6.247269533 | 6.388318667 |
| "Abcb8"   | 3.7121668   | 3.8813184   | 3.71591575  | 3.52673765  | 3.80260345  | 3.69826495  | 3.6707525   | 3.7311389   |
| "Abcb9"   | 2.969774    | 2.97176785  | 2.895136    | 2.8903286   | 2.9706237   | 2.9826943   | 2.83477235  | 2.9381902   |
| "Abcc1"   | 6.5877337   | 4.23012     | 5.690319    | 5.811562    | 5.150322    | 4.6044607   | 5.2352066   | 5.226259    |
| "Abcc2"   | 10.462703   | 10.726863   | 11.466158   | 11.3606615  | 10.842131   | 10.854156   | 10.9771185  | 11.448725   |
| "Abcc3"   | 10.831146   | 11.21998    | 11.676483   | 11.341015   | 11.189243   | 10.359751   | 11.106823   | 10.750782   |
| "Abcc5"   | 3.10918335  | 2.75415515  | 3.128908225 | 2.730174425 | 2.774634025 | 2.7969389   | 2.737963575 | 2.7129816   |
| "Abcc6"   | 7.380963    | 8.007539    | 8.081375    | 8.979067    | 8.279913    | 8.39118     | 9.0278635   | 9.060241    |
| "Abcc8"   | 2.971861    | 2.9997559   | 2.8357291   | 2.9359708   | 2.9949615   | 3.085996    | 2.9524932   | 3.046145    |
| "Abcc9"   | 5.6926503   | 5.254845    | 5.3796735   | 5.0627375   | 5.2786603   | 5.5775065   | 4.7513967   | 4.696958    |
| "Abcd1"   | 5.4764805   | 5.6293797   | 7.1384997   | 6.7499757   | 5.949038    | 5.528633    | 6.288187    | 6.076018    |
| "Abcd2"   | 5.0674086   | 3.8545377   | 7.8215275   | 7.1107054   | 7.1313887   | 5.383073    | 8.638125    | 6.576871    |
| "Abcd3"   | 11.947409   | 13.421384   | 12.722264   | 13.385169   | 13.9695835  | 13.692499   | 13.759673   | 13.786928   |
| "Abcd4"   | 7.7532206   | 7.748437    | 6.07662     | 6.0596213   | 7.127346    | 7.440988    | 6.0204434   | 5.8893886   |
| "Abce1"   | 8.6204145   | 8.752698    | 8.3441601   | 7.97320325  | 8.9570425   | 8.9025735   | 8.586066    | 8.5300535   |
| "Abcf1"   | 5.96820325  | 5.867972417 | 5.516856033 | 5.6342079   | 5.846869667 | 5.840808383 | 5.490321567 | 5.745618283 |
| "Abcf2"   | 4.4401245   | 4.344964    | 4.24507175  | 3.91416405  | 4.28622475  | 4.3267641   | 3.998407    | 4.180305    |
| "Abcf3"   | 4.615136233 | 4.4299686   | 4.824990733 | 4.652960067 | 4.920667067 | 4.911120567 | 4.784291533 | 4.516662633 |
| "Abcg1"   | 7.806536    | 6.763938    | 8.289105    | 7.824987    | 6.917983    | 6.8956094   | 7.8112407   | 7.0959334   |
| "Abcg2"   | 9.674202    | 10.70568    | 10.17691    | 10.426201   | 9.920124    | 10.223686   | 9.855334    | 10.596077   |
| "Abcg3"   | 3.70419655  | 2.9542601   | 5.831057    | 4.5006416   | 3.99003065  | 3.99411565  | 4.3374581   | 3.99584505  |
| "Abcg4"   | 2.29099     | 2.2628913   | 2.1968446   | 2.22753     | 2.2829723   | 2.4444222   | 2.282301    | 2.2659082   |
| "Abcg5"   | 10.582495   | 9.572288    | 11.294316   | 10.539761   | 10.161335   | 9.113647    | 10.169151   | 10.493692   |
| "Abcg8"   | 8.6250725   | 8.197653    | 9.054661    | 8.789411    | 8.371947    | 7.876275    | 8.404776    | 8.988796    |
| "Abhd1"   | 2.5566123   | 5.054276    | 3.3688326   | 3.1912127   | 3.503732    | 3.9119835   | 3.4273992   | 3.0971394   |
| "Abhd10"  | 4.2197411   | 4.83819125  | 4.81603275  | 4.4791963   | 4.4055655   | 4.5874346   | 4.63075115  | 4.95297535  |
| "Abhd12"  | 6.22580715  | 6.04063825  | 6.5193275   | 6.89623935  | 6.55598515  | 6.3451075   | 6.43119365  | 6.3755682   |
| "Abhd14a" | 4.836616    | 4.6813574   | 4.7874846   | 4.7570043   | 4.7981277   | 5.010834    | 4.8001795   | 4.7971635   |
| "Abhd14b" | 9.898923    | 10.268835   | 10.084972   | 10.656358   | 10.667395   | 10.401338   | 10.658767   | 10.780316   |
| "Abhd15"  | 6.8718157   | 8.081511    | 6.2477603   | 7.930512    | 8.846042    | 8.085918    | 7.3177614   | 7.833083    |
| "Abhd16a" | 6.94449015  | 7.1694995   | 7.591766    | 7.6277045   | 7.06945225  | 7.038865    | 7.45298835  | 7.44540615  |
| "Abhd2"   | 2.9727135   | 3.058101    | 2.922432    | 2.9120364   | 2.9602938   | 2.9552062   | 2.96215     | 2.9434803   |
| "Abhd3"   | 10.641441   | 10.609361   | 9.953844    | 10.646664   | 10.886266   | 10.879111   | 11.182003   | 10.629029   |
| "Abhd4"   | 8.730908    | 9.282969    | 10.0764865  | 9.5532835   | 8.63649485  | 8.7979803   | 9.05079285  | 8.9731892   |
| "Abhd5"   | 6.94704885  | 7.5920772   | 7.21511825  | 7.22065285  | 7.02744565  | 7.178117    | 7.22386785  | 7.248552    |
| "Abhd6"   | 6.1115594   | 7.9086445   | 6.916239    | 6.835885    | 8.0912185   | 8.2470194   | 8.3572075   | 7.39604975  |
| "Abi1"    | 7.351072425 | 6.99871605  | 6.807276225 | 6.886918475 | 6.91210725  | 7.06183575  | 6.98308825  | 6.8503328   |
| "Abi3bp"  | 4.5978584   | 3.9910947   | 3.7573757   | 3.90089895  | 4.0865428   | 3.86615185  | 5.16137435  | 4.03484235  |
| "Abl1"    | 5.8266463   | 6.2399187   | 6.6098056   | 6.5739293   | 6.129398    | 6.3270855   | 6.22315     | 6.3339176   |
| "Abli1"   | 6.637565    | 5.737397    | 7.0212545   | 7.007343    | 6.3379073   | 6.6903977   | 7.342979    | 7.163149    |
| "Abpa"    | 2.8483024   | 2.8245294   | 2.7648618   | 2.7922432   | 2.8360264   | 2.8615487   | 2.8365824   | 2.8216903   |
| "Abpb"    | 2.4253356   | 2.3987594   | 2.337105    | 2.3543835   | 2.420279    | 2.417534    | 2.4152226   | 2.4132395   |
| "Abpd"    | 2.406986    | 2.3780098   | 2.370006    | 2.3385282   | 2.450635    | 2.3957257   | 2.388599    | 2.4486077   |
| "Abph"    | 2.395619    | 2.3640466   | 2.3226626   | 2.345659    | 2.3843803   | 2.381071    | 2.380756    | 2.3748841   |
| "Abr"     | 5.2191963   | 4.707355    | 4.902115    | 4.868182    | 4.811471    | 4.8827643   | 4.8166246   | 4.5451207   |
| "Abt1"    | 8.589666    | 7.9278407   | 7.2579026   | 7.3186426   | 7.2939844   | 7.627761    | 7.3550005   | 7.468476    |
| "Abtb1"   | 5.8941965   | 5.9955025   | 5.684202    | 6.1489615   | 5.6945615   | 5.848208    | 5.525506    | 5.912037    |
| "Acaa1a"  | 9.35839915  | 10.21881743 | 9.773167375 | 10.12290185 | 10.45329293 | 10.4498016  | 10.535696   | 10.27088525 |
| "Acaa1b"  | 11.7040205  | 13.940642   | 12.944093   | 13.729673   | 14.652539   | 14.586711   | 14.567721   | 14.406591   |
| "Acaa2"   | 11.16842467 | 12.36939333 | 11.308008   | 11.86021767 | 12.670341   | 12.40147    | 12.30562667 | 12.56172867 |
| "Acaca"   | 2.3830118   | 2.3702574   | 2.3328643   | 2.3455706   | 2.3765287   | 2.3602104   | 2.3741307   | 2.364759    |
| "Acacb"   | 5.7974153   | 7.950502    | 5.8855386   | 6.1652517   | 7.5151896   | 7.326473    | 4.7950444   | 4.6904445   |
| "Acad10"  | 4.598614    | 6.0314555   | 6.0724235   | 5.985986    | 5.7643957   | 5.080099    | 6.2219844   | 6.111177    |
| "Acad11"  | 11.239044   | 12.2524235  | 11.147996   | 11.8125295  | 12.575949   | 12.42994375 | 12.145856   | 12.123708   |
| "Acad8"   | 7.578773    | 7.906849    | 7.33110765  | 7.6162293   | 7.5534815   | 7.429148    | 7.9026525   | 7.5799195   |
| "Acad9"   | 5.31805035  | 5.4777405   | 6.7410775   | 6.7357836   | 6.3348815   | 5.098887    | 6.88730625  | 5.8802147   |
| "Acadl"   | 7.151692    | 7.46733365  | 7.07216495  | 7.1849704   | 7.59693215  | 7.64687115  | 7.48539075  | 7.3809659   |
| "Acadm"   | 12.3133955  | 13.133372   | 12.392881   | 12.710091   | 13.504847   | 13.339381   | 12.959926   | 12.710548   |
| "Acads"   | 8.368148    | 9.103331    | 8.756008    | 9.04748     | 9.347579    | 8.988504    | 8.990412    | 9.115872    |
| "Acadsb"  | 9.21301     | 9.945414    | 9.610793    | 10.077127   | 9.677763    | 9.505988    | 9.905409    | 9.97966     |
| "Acadvl"  | 11.280819   | 12.086003   | 11.16729    | 11.308046   | 12.382156   | 12.344894   | 11.930666   | 11.899164   |
| "Acat1"   | 10.037995   | 11.80365667 | 11.29041167 | 11.2483155  | 12.12546967 | 11.57968417 | 12.24692833 | 11.80010433 |
| "Acat2"   | 9.6032225   | 9.3883865   | 11.3997335  | 10.78457375 | 9.378525    | 8.4177775   | 10.3006155  | 10.62057    |
| "Acdb3"   | 5.840677067 | 5.626065233 | 5.7740523   | 5.633453533 | 5.348543733 | 5.567546433 | 5.3978365   | 5.233624    |
| "Acdb6"   | 6.06644085  | 6.5080736   | 5.9097458   | 6.0076895   | 6.1263872   | 6.5250155   | 5.8347283   | 6.17777285  |
| "Accn5"   | 5.5238066   | 6.5819626   | 4.9984      | 6.534749    | 5.192763    | 7.419928    | 4.796745    | 5.3991556   |
| "Acd"     | 5.245767    | 5.993357    | 5.3830247   | 5.3760796   | 5.4104776   | 5.4053025   | 5.4145985   | 5.3988986   |
| "Ace"     | 2.7330907   | 2.7717645   | 2.668023    | 2.77483295  | 2.73362765  | 2.72817205  | 2.7285168   | 2.7194029   |
| "Ace2"    | 2.861428    | 2.87465465  | 2.76272575  | 2.8035103   | 2.8869259   | 2.8448305   | 2.85176335  | 2.839293    |
| "Acer2"   | 5.9253305   | 5.73747315  | 5.3199748   | 5.17639815  | 5.87465325  | 5.7232049   | 5.6058792   | 5.1955697   |
| "Ache"    | 2.37526     | 2.3464808   | 2.2911558   | 2.3165262   | 2.3675659   | 2.3624544   | 2.3633723   | 2.3476255   |
| "Acin1"   | 7.06564355  | 6.83178685  | 7.22075625  | 6.99339195  | 7.09622475  | 7.108068    | 7.126429    | 7.1806025   |
| "Acly"    | 6.7728336   | 6.69772262  | 7.25627172  | 6.90045402  | 7.51299892  | 5.95657838  | 6.91142646  | 7.06354176  |
| "Acnat2"  | 9.665753    | 8.830853    | 9.918443    | 8.259169    | 9.24293     | 9.807918    | 8.489971    | 6.9288025   |
| "Aco1"    | 10.28812525 | 10.535054   | 10.477931   | 10.851781   | 10.785847   | 10.2460255  | 11.246259   | 10.9840085  |
| "Aco2"    | 9.828009    | 10.542325   | 9.8308855   | 9.994353    | 10.5804255  | 10.2824905  | 10.0319745  | 10.1761885  |
| "Acot1"   | 7.4212065   | 10.616214   | 4.8204646   | 6.341103    | 9.734592    | 11.611765   | 8.748366    | 7.89550335  |
| "Acot10"  | 7.6436167   | 5.697191    | 7.686938    | 6.9058022   | 6.2954497   | 6.670354    | 7.4411736   | 6.5970187   |

|            |             |             |             |             |             |             |             |             |
|------------|-------------|-------------|-------------|-------------|-------------|-------------|-------------|-------------|
| "Acot11"   | 2.1166716   | 2.1938903   | 2.157651    | 2.176416    | 2.4053586   | 2.203751    | 2.8480945   | 2.1897027   |
| "Acot12"   | 9.655296    | 10.535518   | 8.13672915  | 9.2389145   | 10.4663125  | 10.4538865  | 9.749175    | 9.8124685   |
| "Acot13"   | 8.714421    | 8.947618    | 9.768399    | 10.058645   | 9.911632    | 9.642862    | 10.480649   | 10.316931   |
| "Acot2"    | 3.6004076   | 3.573029    | 3.2701683   | 3.3153718   | 4.7236214   | 4.497406    | 3.5925732   | 3.5838368   |
| "Acot3"    | 5.243014    | 7.4513855   | 5.686443    | 8.10649     | 10.368996   | 7.837215    | 9.322754    | 6.936774    |
| "Acot4"    | 4.41756915  | 5.2856422   | 4.11883905  | 4.6233757   | 6.0700302   | 5.5430053   | 5.40046715  | 4.5366994   |
| "Acot5"    | 2.4362109   | 2.4058523   | 2.3291311   | 2.3658624   | 2.4307985   | 2.4263318   | 2.4229078   | 2.4191465   |
| "Acot6"    | 2.4615517   | 2.4397843   | 2.3972883   | 2.4198465   | 2.4585223   | 2.4494598   | 2.4489763   | 2.4618714   |
| "Acot7"    | 5.8267164   | 6.283951    | 5.6051106   | 6.1847477   | 6.1529226   | 6.263432    | 5.8883963   | 6.317704    |
| "Acot8"    | 7.0505996   | 8.309075    | 7.4180794   | 7.8231325   | 8.301019    | 8.306436    | 7.7369957   | 7.7813425   |
| "Acot9"    | 7.1036105   | 6.0922565   | 7.1510096   | 6.634636    | 6.4644995   | 6.538411    | 6.928024    | 6.411516    |
| "Acox1"    | 11.771761   | 12.4484815  | 11.658943   | 12.1402305  | 12.544147   | 12.22452475 | 12.36781125 | 12.2251365  |
| "Acox2"    | 10.290609   | 11.334736   | 11.56246    | 11.100723   | 10.718073   | 11.098227   | 10.627785   | 10.264161   |
| "Acp1"     | 8.57954436  | 8.81799336  | 8.5725833   | 8.65484472  | 8.7528733   | 8.64704726  | 9.02313824  | 8.9728115   |
| "Acp2"     | 6.881078    | 6.528385333 | 7.6182475   | 7.372470433 | 6.7399866   | 6.857363633 | 6.9155884   | 6.438742367 |
| "Acp5"     | 10.710096   | 10.104724   | 10.541773   | 10.853382   | 10.454742   | 10.42183    | 10.248709   | 10.507214   |
| "Acp6"     | 6.435915    | 7.112599    | 6.7217665   | 7.252615    | 7.384374    | 7.6657634   | 7.1688223   | 7.314345    |
| "Acpp"     | 2.5149322   | 2.484404    | 2.4398837   | 2.4378846   | 2.4999526   | 2.4945416   | 2.495268    | 2.4883986   |
| "Acrbp"    | 2.88887095  | 2.8625992   | 2.8139112   | 2.84046555  | 2.9582509   | 2.88320835  | 2.87351455  | 2.9193588   |
| "Acrv1"    | 2.3535752   | 2.326194    | 2.2699013   | 2.2996056   | 2.3509543   | 2.3750377   | 2.3410056   | 2.3376744   |
| "Acsbg1"   | 2.4053984   | 2.37902     | 2.3171816   | 2.3682616   | 2.4024003   | 2.3969705   | 2.3943913   | 2.380061    |
| "Acsf2"    | 4.749525    | 5.528342    | 5.0426536   | 5.949377    | 6.090996    | 4.9811406   | 5.8016467   | 5.899072    |
| "Acsf3"    | 3.885359    | 5.4966936   | 5.2631474   | 5.4036293   | 5.6390533   | 5.47511     | 5.685167    | 5.598586    |
| "Acsi1"    | 9.723934875 | 10.60445418 | 8.629250625 | 9.074892875 | 10.41804775 | 10.3573546  | 9.976641325 | 10.147078   |
| "Acsi4"    | 8.425677533 | 7.115254933 | 7.7894908   | 6.942331333 | 6.450207567 | 6.556716667 | 6.951277533 | 7.598241467 |
| "Acsi5"    | 10.095354   | 10.761641   | 11.2392645  | 11.213113   | 11.171506   | 10.815952   | 11.918081   | 11.465237   |
| "Acsrm1"   | 10.259558   | 10.466401   | 11.492602   | 11.526116   | 10.616707   | 10.082393   | 10.8629265  | 11.347874   |
| "Acsrm2"   | 2.956325225 | 3.330447    | 3.5903696   | 4.99879995  | 2.9586883   | 3.2144878   | 3.267055125 | 3.58931335  |
| "Acsrm3"   | 7.755486    | 9.120942    | 8.117207    | 8.671776    | 9.043601    | 8.636173    | 8.460454    | 9.152196    |
| "Acss1"    | 2.671781733 | 2.648165367 | 2.543619267 | 2.589854467 | 2.687008    | 2.688939333 | 2.647889933 | 2.6959073   |
| "Acss2"    | 9.561035    | 9.891472    | 11.228306   | 10.783305   | 9.239964    | 8.3229175   | 10.063511   | 10.617825   |
| "Acta1"    | 2.8278856   | 2.7913113   | 2.774896    | 2.6859765   | 2.8361046   | 2.8238173   | 2.7876334   | 2.8269668   |
| "Acta2"    | 6.077816    | 6.001192    | 6.512537    | 6.5008793   | 6.721757    | 6.9503536   | 4.757884    | 6.509577    |
| "Actb"     | 12.6347726  | 12.1567982  | 13.0668338  | 12.414782   | 12.2684624  | 12.070138   | 12.5322539  | 12.4976972  |
| "Actg1"    | 13.024758   | 12.091442   | 12.918997   | 11.881396   | 11.824962   | 11.466178   | 12.264284   | 11.562548   |
| "Actg2"    | 2.4590685   | 2.432696    | 2.352391    | 2.3919737   | 2.456954    | 2.4688296   | 2.4466722   | 2.4427903   |
| "Actl6a"   | 7.87103675  | 7.76842635  | 7.3539888   | 7.412004    | 7.7395468   | 7.91204015  | 7.933163    | 7.84411025  |
| "Actn1"    | 5.4206191   | 4.9188355   | 5.9953593   | 5.618975    | 5.5119787   | 5.1639398   | 5.787895    | 5.9095095   |
| "Actn4"    | 9.027065    | 9.339878    | 9.475745    | 9.018051    | 9.435365    | 9.499447    | 9.097992    | 8.916293    |
| "Actr10"   | 7.7228405   | 7.9160505   | 7.5203075   | 7.6243377   | 7.64196725  | 7.711767    | 7.6283486   | 7.56049735  |
| "Actr1a"   | 5.80268215  | 5.532727    | 5.25157335  | 5.5142194   | 5.39704255  | 5.6495974   | 5.5908135   | 5.75304115  |
| "Actr1b"   | 4.7989398   | 4.97009125  | 4.49141405  | 4.83728635  | 4.8417325   | 4.8370916   | 4.8486215   | 4.9233333   |
| "Actr2"    | 11.269602   | 11.287991   | 11.492877   | 11.413591   | 11.237729   | 11.174641   | 11.200723   | 11.310731   |
| "Actr3"    | 10.97487367 | 10.361596   | 11.116622   | 10.54968967 | 10.51405433 | 10.71672033 | 10.85148633 | 10.5430585  |
| "Actr6"    | 8.01066     | 8.158873    | 8.022692    | 7.979534    | 7.8619924   | 8.216934    | 8.542515    | 7.9235463   |
| "Actr8"    | 7.9988356   | 7.907573    | 7.0722938   | 7.6209593   | 7.6641426   | 7.9856167   | 7.7101045   | 8.023733    |
| "Actrt2"   | 2.4455874   | 2.4200897   | 2.394959    | 2.3826456   | 2.4460154   | 2.4336739   | 2.429965    | 2.4248948   |
| "Acvr1"    | 5.04479985  | 5.08409485  | 5.49593315  | 5.2806782   | 5.28897065  | 5.0149746   | 5.34733055  | 5.49136665  |
| "Acvr1b"   | 7.3000607   | 8.543509    | 8.187617    | 8.608841    | 7.613589    | 7.7542167   | 7.6846576   | 8.211768    |
| "Acvr1c"   | 2.4171908   | 2.3890047   | 2.3524923   | 2.3259683   | 2.4024637   | 2.4905229   | 2.412785    | 2.395398    |
| "Acvr2a"   | 6.7227268   | 7.1372635   | 6.30786155  | 6.648166    | 6.87251     | 7.0569113   | 6.5892115   | 6.62496585  |
| "Acvr2b"   | 2.7566192   | 2.9714854   | 2.6926553   | 3.307577    | 2.7457933   | 2.7389202   | 2.7461305   | 2.730359    |
| "Acvr1l"   | 2.548546    | 2.5164258   | 2.6582952   | 2.6390328   | 2.5351465   | 2.392505    | 2.5494106   | 2.5271468   |
| "Acy1"     | 6.0303183   | 6.245072    | 6.8892093   | 7.501968    | 7.24981     | 6.905628    | 7.517077    | 7.305352    |
| "Acy3"     | 5.4242096   | 6.5523276   | 7.756978    | 8.26741     | 7.7771664   | 6.622568    | 8.6485615   | 8.130654    |
| "Acyp1"    | 5.574729233 | 5.217695267 | 5.084877667 | 5.584442733 | 5.113047567 | 5.637295    | 5.591267    | 5.469306333 |
| "Acyp2"    | 6.70497     | 6.475424    | 7.162013    | 6.150266    | 6.073049    | 6.846308    | 7.0787954   | 6.5112624   |
| "Ada"      | 5.5027966   | 4.902171    | 4.38964     | 3.9855332   | 4.750291    | 3.8411777   | 4.53806     | 3.2665246   |
| "Adad1"    | 2.373249    | 2.3502629   | 2.3098435   | 2.3315613   | 2.3693397   | 2.3713984   | 2.352727    | 2.373227    |
| "Adam10"   | 5.754987833 | 5.4701265   | 5.8596345   | 5.659273933 | 5.619413433 | 5.547765167 | 5.704951467 | 5.557254333 |
| "Adam11"   | 2.7225204   | 2.697939    | 2.587277    | 2.6499145   | 2.7447753   | 2.7318668   | 2.6957626   | 2.7276702   |
| "Adam12"   | 2.2235737   | 2.1925747   | 2.3345883   | 2.1698833   | 2.2147167   | 2.4297268   | 2.219322    | 2.2024913   |
| "Adam15"   | 3.1462879   | 3.1548012   | 3.0856607   | 3.0680509   | 3.15516355  | 3.1762185   | 3.0693647   | 3.13317395  |
| "Adam17"   | 6.2458034   | 5.2065132   | 6.654058333 | 6.130541967 | 5.837377767 | 5.811548767 | 6.139391067 | 5.764634967 |
| "Adam18"   | 2.4860957   | 2.4607403   | 2.4137616   | 2.4394064   | 2.470072    | 2.4748254   | 2.4685616   | 2.4689393   |
| "Adam19"   | 3.4695065   | 3.1669273   | 4.323469    | 3.543649    | 3.3895545   | 3.2904794   | 3.4591167   | 3.4797091   |
| "Adam1a"   | 2.4053328   | 2.3951708   | 2.33427755  | 2.35785115  | 2.4067056   | 2.396753    | 2.40154485  | 2.4097339   |
| "Adam1b"   | 2.6247602   | 2.6738896   | 2.5018983   | 2.571511    | 2.6448247   | 2.6213572   | 2.600201    | 2.614423    |
| "Adam23"   | 6.453606    | 5.851286    | 5.4470243   | 5.4183702   | 5.941734    | 5.3826294   | 5.222711    | 4.739932    |
| "Adam24"   | 2.89791     | 2.873035    | 2.7417436   | 2.8131092   | 2.9223986   | 2.9232726   | 2.8659167   | 2.9275992   |
| "Adam25"   | 3.2598727   | 3.301563    | 3.0935342   | 3.1754458   | 3.3175466   | 3.3159895   | 3.215672    | 3.3223777   |
| "Adam26a"  | 2.7246838   | 2.695435    | 2.629016    | 2.6599188   | 2.7294405   | 2.7297366   | 2.6937866   | 2.7106266   |
| "Adam28"   | 2.496957    | 2.4781206   | 2.4023018   | 2.425909    | 2.4937212   | 2.4888892   | 2.4697874   | 2.4816034   |
| "Adam5"    | 2.7413254   | 2.7094874   | 2.630431    | 2.665424    | 2.7606573   | 2.7330132   | 2.7113137   | 2.7240329   |
| "Adam8"    | 2.5842347   | 2.2638211   | 2.2709002   | 2.2663918   | 2.298038    | 2.2898932   | 2.2995973   | 2.2867842   |
| "Adam9"    | 10.908784   | 10.727661   | 10.442296   | 10.637216   | 10.628686   | 10.718949   | 10.823689   | 10.621511   |
| "Adamdec1" | 7.3432508   | 4.446443    | 8.958674    | 8.343436    | 6.1922703   | 5.9423647   | 7.1370845   | 7.198716    |
| "Adamts1"  | 8.942894    | 6.287502    | 6.6987357   | 6.2715807   | 6.5445423   | 7.2651277   | 6.2038956   | 5.8801565   |
| "Adamts15" | 2.3214488   | 2.28447     | 2.8123183   | 2.250736    | 2.2889128   | 2.2961802   | 2.3104594   | 2.291273    |
| "Adamts4"  | 2.488542    | 2.4475176   | 2.4322572   | 2.436585    | 2.4700737   | 2.4673963   | 2.4675055   | 2.4715261   |
| "Adamts5"  | 3.32458115  | 3.2336074   | 3.50158075  | 3.24745225  | 3.36906115  | 3.3590014   | 3.312135    | 2.77788445  |

|             |             |             |             |             |             |             |             |             |
|-------------|-------------|-------------|-------------|-------------|-------------|-------------|-------------|-------------|
| "Adams7"    | 3.351238    | 3.3184018   | 4.523633    | 5.170596    | 3.3384275   | 3.328948    | 3.88409     | 4.2092943   |
| "Adams8"    | 2.682704    | 2.7130888   | 2.6751556   | 2.5934029   | 2.6842258   | 2.6836114   | 2.6494265   | 2.7414293   |
| "Adams14"   | 2.7993028   | 2.7678142   | 2.749333    | 2.759475    | 2.786982    | 2.7834997   | 2.8078134   | 2.7762327   |
| "Adap2"     | 7.99582315  | 8.867377    | 8.45598375  | 8.616333    | 8.8091195   | 8.519206    | 8.4488645   | 8.3937635   |
| "Adar"      | 4.500167    | 4.3273115   | 4.963026    | 4.5660663   | 4.551101    | 4.5294375   | 4.5794044   | 4.691712    |
| "Adarb1"    | 4.251514    | 5.2778435   | 3.6582408   | 4.1178966   | 4.2168317   | 4.6279316   | 4.245459    | 4.826704    |
| "Adat1"     | 2.60230485  | 2.58799795  | 2.6416647   | 2.54301915  | 2.7221047   | 2.6103674   | 2.5967134   | 2.68281865  |
| "Adat2"     | 4.1974306   | 6.085566    | 4.303569    | 3.7673576   | 4.195297    | 4.9654536   | 4.2311535   | 4.330716    |
| "Adck1"     | 5.4710984   | 5.211226    | 5.609637    | 5.4295683   | 5.3106585   | 5.45061     | 5.541237    | 5.379797    |
| "Adck3"     | 9.1869445   | 9.0798035   | 9.488499    | 9.703515    | 9.178945    | 8.8428245   | 10.66598475 | 9.46785075  |
| "Adck4"     | 3.4297307   | 2.9930017   | 4.6858015   | 2.8591683   | 2.6307638   | 2.8848317   | 2.7902753   | 2.8815458   |
| "Adcy3"     | 4.1696314   | 4.2491801   | 4.17069015  | 4.19351785  | 4.32243585  | 4.31031925  | 4.24857045  | 4.22330895  |
| "Adcy4"     | 4.7260213   | 4.4444747   | 4.8139715   | 4.765641    | 4.2773643   | 4.393905    | 4.3199534   | 4.073317    |
| "Adcy6"     | 5.628906    | 6.5682526   | 5.9085298   | 6.145577    | 6.217651    | 6.0280027   | 6.0305233   | 6.71542     |
| "Adcy7"     | 4.6501399   | 4.0851629   | 5.159286033 | 5.024022333 | 4.710953367 | 4.576223267 | 4.968595433 | 4.619919267 |
| "Adcy8"     | 2.589171    | 2.5612476   | 2.50802     | 2.5031953   | 2.5979428   | 2.60702     | 2.5821023   | 2.5765262   |
| "Adcy9"     | 7.103517567 | 8.37019     | 7.530941667 | 8.335322833 | 7.493371767 | 7.254501333 | 8.247872867 | 8.099715767 |
| "Adcyap1r1" | 2.4222337   | 2.4222503   | 2.341289    | 2.4018545   | 2.4441953   | 2.4374971   | 2.4366875   | 2.4413328   |
| "Add1"      | 4.209465133 | 4.295474267 | 4.4215084   | 4.392921667 | 4.448708433 | 4.2770252   | 4.588502733 | 4.4040973   |
| "Add2"      | 2.5904081   | 2.559191    | 2.43463685  | 2.54115405  | 2.6194914   | 2.60453515  | 2.5761263   | 2.5687858   |
| "Add3"      | 5.4815919   | 5.613142967 | 5.740426    | 5.6656793   | 5.8800311   | 5.129575133 | 5.868976767 | 5.808914367 |
| "Adh1"      | 13.763975   | 13.829589   | 14.133977   | 14.130716   | 14.17265    | 13.69602    | 14.409986   | 14.20982    |
| "Adh4"      | 8.361116    | 9.549759    | 9.26406     | 10.372125   | 9.504778    | 9.4440565   | 10.107112   | 11.583619   |
| "Adh5"      | 13.037284   | 13.40712    | 13.22664    | 13.512497   | 13.423413   | 13.143109   | 13.419335   | 13.679014   |
| "Adh7"      | 4.1821533   | 5.18621985  | 3.1895087   | 3.309786    | 3.4166892   | 5.38582885  | 3.43318915  | 3.5232321   |
| "Adhfe1"    | 9.267828    | 9.934405    | 10.0685155  | 10.35293125 | 9.626064    | 9.47864475  | 10.0471555  | 10.09856975 |
| "Adi1"      | 8.959898667 | 9.722888    | 9.269964667 | 9.750823333 | 9.813245333 | 9.533724    | 9.580446667 | 9.908523667 |
| "Adipor1"   | 9.1073589   | 9.061310433 | 8.165198567 | 8.668867333 | 8.698084667 | 8.712746833 | 8.444435    | 8.519033667 |
| "Adipor2"   | 9.626886    | 10.296688   | 9.618648    | 9.523562    | 10.796267   | 9.992928    | 9.891775    | 10.3627205  |
| "Adk"       | 9.099019825 | 9.038353175 | 8.584396325 | 8.746089425 | 9.195227925 | 9.3265479   | 8.97912195  | 8.91341685  |
| "Adm"       | 6.01836     | 4.855264    | 5.3433185   | 4.051562    | 5.353247    | 5.2375827   | 3.929121    | 4.081588    |
| "Adnp"      | 9.3146925   | 9.947524    | 10.057486   | 10.206789   | 10.229657   | 10.288329   | 10.140636   | 10.285357   |
| "Adnp2"     | 5.25699335  | 4.81475295  | 4.93974625  | 4.87008635  | 4.893954    | 4.8131308   | 4.71992635  | 4.9873259   |
| "Adora1"    | 4.0664758   | 3.61975635  | 4.0171919   | 3.666327    | 3.75621715  | 3.3649617   | 3.3772054   | 2.7791506   |
| "Adora2a"   | 2.904679    | 2.9262388   | 3.2839386   | 2.9138389   | 2.942088    | 2.9390256   | 2.8982003   | 2.9372027   |
| "Adora2b"   | 3.1815119   | 3.1814022   | 3.043553    | 3.165394    | 3.211143    | 3.2151678   | 3.1589308   | 3.1858902   |
| "Adpgk"     | 5.56828685  | 4.8582363   | 4.5579553   | 4.61201575  | 4.8058647   | 5.31098315  | 4.415427    | 4.5161332   |
| "Adprh"     | 4.98257885  | 4.35723115  | 5.0011258   | 4.6226506   | 4.40087445  | 4.5720618   | 4.77192325  | 4.42495935  |
| "Adprhl2"   | 4.6046658   | 4.707668    | 4.5727143   | 4.579624    | 3.97319     | 4.4156346   | 4.4972444   | 4.358334    |
| "Adra1b"    | 1.9189999   | 1.9720187   | 3.257502    | 2.8623095   | 1.8519665   | 1.8048136   | 3.2534611   | 2.0131059   |
| "Adrb1"     | 6.9168806   | 5.0870285   | 4.963169    | 5.019236    | 5.421032    | 5.011154    | 5.1032305   | 5.104868    |
| "Adrb2"     | 8.182873    | 4.200928    | 4.3754215   | 4.068991    | 4.8611164   | 4.6851277   | 4.4660406   | 3.7017412   |
| "Adrb3"     | 2.8688133   | 2.7954655   | 3.054892    | 3.5975685   | 2.8518782   | 2.9172902   | 2.8793952   | 2.8650656   |
| "Adrbk1"    | 6.23766115  | 5.9764863   | 6.4413455   | 6.23323915  | 6.064591    | 6.03588395  | 6.046335    | 6.175201    |
| "Adrm1"     | 8.092397    | 8.570517    | 8.0715658   | 8.11611815  | 8.59538     | 8.6637195   | 8.1482      | 8.274872    |
| "Adsl"      | 6.425502    | 7.1042504   | 6.7394423   | 6.1773095   | 6.3291464   | 6.7402153   | 6.7632713   | 6.1963882   |
| "Adss"      | 9.513082    | 9.623403    | 9.008257    | 9.28329     | 9.400449    | 9.433122    | 9.05442     | 9.309865    |
| "Adssl1"    | 10.025608   | 10.560566   | 9.63596     | 8.772958    | 9.167844    | 9.639839    | 9.3163395   | 10.026424   |
| "Aebp1"     | 3.55039645  | 3.7589285   | 3.0578111   | 3.31302     | 3.3560574   | 3.27554465  | 3.44870445  | 3.2676083   |
| "Aebp2"     | 5.8434741   | 5.9516538   | 5.473019    | 5.5069194   | 5.5954183   | 5.80331205  | 5.52163365  | 5.58961505  |
| "Aen"       | 5.1010711   | 4.91936375  | 4.77322525  | 4.76292885  | 5.50474035  | 5.7825568   | 4.6052346   | 4.4541755   |
| "Aes"       | 6.1801753   | 7.2256193   | 7.218353    | 7.6218157   | 7.064861    | 6.522081    | 7.090726    | 7.3052664   |
| "AF067063"  | 2.5946667   | 2.5675814   | 2.4647713   | 2.5044935   | 2.6249      | 2.6278105   | 2.554508    | 2.5804408   |
| "AF251705"  | 7.7932568   | 5.7959266   | 7.813722    | 7.106496    | 6.5059714   | 6.075017    | 6.802861    | 6.0917625   |
| "AF366264"  | 2.7072484   | 2.677763    | 2.6030302   | 2.6383529   | 2.7029898   | 2.706051    | 2.6354852   | 2.6979275   |
| "Aff1"      | 5.5923196   | 5.42651785  | 5.3162505   | 5.3951723   | 5.2865689   | 5.54501435  | 5.62162785  | 5.31835135  |
| "Aff2"      | 2.3807983   | 2.3512523   | 2.292536    | 2.3207054   | 2.3783383   | 2.3710966   | 2.3699937   | 2.3728192   |
| "Aff4"      | 7.1588415   | 7.08429865  | 6.35199475  | 6.6524405   | 6.7214905   | 7.032112    | 6.645605    | 6.82938425  |
| "Afg311"    | 4.9208552   | 5.23529965  | 5.09943245  | 5.23282195  | 5.02487185  | 5.1284206   | 5.02657385  | 5.1634462   |
| "Afg312"    | 7.8170825   | 8.0612555   | 7.934907    | 7.7481347   | 8.1447337   | 7.923752    | 7.8359565   | 7.841936    |
| "Afm"       | 11.8338165  | 11.389598   | 12.16893525 | 12.3185525  | 12.31239025 | 12.1263925  | 12.750672   | 12.423579   |
| "Afmid"     | 5.35329     | 4.6300874   | 4.80722     | 4.984921    | 3.6901708   | 4.8986697   | 5.649888    | 4.666753    |
| "Afp"       | 3.22106652  | 3.20366552  | 3.78558042  | 3.46533846  | 3.29103392  | 3.17719994  | 3.71956606  | 3.79660728  |
| "Aftph"     | 8.20699     | 7.75343985  | 7.912896    | 7.8971335   | 8.017223    | 8.0856975   | 7.98250825  | 7.97949475  |
| "Agap1"     | 2.6658435   | 2.5836291   | 2.4769206   | 2.5786896   | 2.6033578   | 2.5990405   | 2.6072135   | 2.5971751   |
| "Agap2"     | 2.4565897   | 2.4318552   | 2.3578982   | 2.4147      | 2.4511054   | 2.4623966   | 2.442379    | 2.4356341   |
| "Agap3"     | 5.3471994   | 5.090059    | 4.726582    | 5.263426    | 5.329435    | 5.250019    | 5.1853456   | 5.3261566   |
| "Agbl3"     | 3.08871825  | 3.1911848   | 3.1714485   | 3.2175754   | 3.1976198   | 3.32595145  | 3.44742455  | 3.42279625  |
| "Agbl5"     | 4.5232162   | 5.408326    | 5.298626    | 5.2921343   | 5.1127915   | 4.4859824   | 5.5970526   | 5.5389543   |
| "Ager"      | 2.7064905   | 2.777401    | 2.5743163   | 2.7878003   | 2.831929    | 2.8407176   | 2.6498103   | 2.9703994   |
| "Agfg1"     | 6.36508924  | 6.1812691   | 6.50211196  | 6.03360388  | 6.0372929   | 6.16095324  | 6.2666605   | 6.04903504  |
| "Agfg2"     | 5.53812275  | 6.37076415  | 5.6286228   | 5.597597    | 5.86899335  | 6.11207685  | 6.38039115  | 5.63319885  |
| "Aggf1"     | 8.284896    | 8.433346    | 8.040609    | 8.455364    | 8.621788    | 8.356976    | 8.541857    | 8.619689    |
| "Agk"       | 3.2674477   | 3.3367536   | 3.3288236   | 3.265792    | 3.3502269   | 3.3529644   | 3.8011336   | 3.3459253   |
| "Agl"       | 5.66246215  | 6.3287764   | 6.480443    | 6.5764727   | 6.8839395   | 6.27178185  | 7.7517813   | 7.3788667   |
| "Agmat"     | 9.959297    | 10.426302   | 10.63015    | 11.007231   | 11.135914   | 10.328445   | 11.050169   | 11.102556   |
| "Agpat1"    | 2.258809    | 2.2473178   | 2.2080839   | 2.3619952   | 2.3184247   | 2.2577195   | 2.2488956   | 2.238       |
| "Agpat3"    | 9.109607    | 9.933711    | 8.991378    | 9.081497    | 9.662541    | 9.775569    | 8.987562    | 9.164144    |
| "Agpat5"    | 2.8410695   | 2.719414    | 2.8520024   | 2.7894003   | 2.9338229   | 3.060831    | 2.81978     | 2.79339     |
| "Agpat6"    | 4.8875685   | 4.8017535   | 4.0152984   | 4.29327485  | 4.47443355  | 4.58582075  | 3.9741116   | 4.37100435  |
| "Agr2"      | 3.5401766   | 3.6098487   | 3.3613064   | 3.4474778   | 3.699483    | 3.7323577   | 3.4233453   | 3.7643592   |

|            |             |             |             |             |             |             |             |             |
|------------|-------------|-------------|-------------|-------------|-------------|-------------|-------------|-------------|
| "Agrn"     | 6.470238    | 6.4321985   | 7.4455357   | 6.8838124   | 6.554088    | 6.406871    | 6.6811237   | 6.525891    |
| "Agrp"     | 2.384464    | 2.3526583   | 2.291214    | 2.3125143   | 2.3752818   | 2.3613822   | 2.3694363   | 2.3684485   |
| "Agt"      | 12.643354   | 11.765615   | 12.466672   | 12.550104   | 12.368106   | 12.471656   | 12.338369   | 11.873131   |
| "Agtbpb1"  | 7.611714    | 6.688429    | 6.3392115   | 6.627202    | 6.866767    | 7.5756555   | 7.2018895   | 6.5840015   |
| "Agt2"     | 2.8009682   | 2.774118    | 2.6565123   | 2.7190862   | 2.8194323   | 2.8214257   | 2.7695181   | 2.8163047   |
| "Agt2rap"  | 4.6558824   | 4.4601164   | 3.8245072   | 4.1323795   | 4.6305256   | 4.1968536   | 4.3106422   | 4.0314484   |
| "Agxt"     | 12.787836   | 10.626797   | 11.524873   | 11.162026   | 10.38081    | 10.896291   | 11.700847   | 11.412583   |
| "Agxt2l2"  | 5.1804228   | 5.7613785   | 5.4084357   | 5.3373344   | 5.8884078   | 5.4768255   | 5.3671834   | 5.49271645  |
| "Ahctf1"   | 8.0007635   | 7.60842255  | 7.65800785  | 6.8059127   | 7.48910235  | 8.173537    | 8.18785825  | 6.9221423   |
| "Ahcy"     | 14.5084505  | 14.631485   | 13.751805   | 14.098744   | 14.347186   | 14.585232   | 13.674474   | 14.043839   |
| "Ahcyl1"   | 9.135546433 | 9.961279333 | 8.523449    | 8.936902233 | 8.985074333 | 10.100547   | 8.780369333 | 8.536340667 |
| "Ahcyl2"   | 5.085586867 | 4.8652543   | 4.869575767 | 4.806730133 | 4.626822067 | 4.894786833 | 4.8449071   | 5.186318967 |
| "Ahd1"     | 4.221509    | 4.180475    | 3.9521444   | 4.169523    | 4.303362    | 4.319521    | 4.2652116   | 4.070897    |
| "Ahi1"     | 3.3881438   | 2.8149898   | 2.7198737   | 2.092205    | 2.834315    | 2.8497837   | 2.8183725   | 2.815118    |
| "Ahnak"    | 4.0138893   | 3.854117933 | 4.337340167 | 4.200266767 | 3.853604467 | 3.7316449   | 4.2362319   | 4.266547    |
| "Ahr"      | 6.3839962   | 5.8297811   | 6.4757805   | 6.29854635  | 6.1265604   | 6.0080593   | 6.3823405   | 6.2686022   |
| "Ahsa1"    | 9.5342245   | 9.417809    | 9.618074    | 9.529345    | 9.698538    | 9.966709    | 9.700156    | 9.596075    |
| "Ahsa2"    | 8.547893    | 8.107918    | 8.689249    | 8.656224    | 8.130495    | 8.96324     | 8.4479685   | 8.851107    |
| "Ahsa3"    | 14.462848   | 14.127079   | 14.388334   | 14.473623   | 14.680721   | 14.432398   | 14.522799   | 14.574222   |
| "Ahsa4"    | 3.4752495   | 3.4361548   | 3.1153631   | 3.7790656   | 3.5219698   | 4.5350304   | 3.1710048   | 3.23075     |
| "Ai314180" | 7.5144835   | 8.117789    | 7.905844    | 8.131017    | 7.7193327   | 8.542587    | 7.9482355   | 8.202572    |
| "Ai314976" | 7.4014      | 7.8581285   | 7.656948    | 7.785226    | 7.699787    | 7.562538    | 8.2634535   | 8.313119    |
| "Ai316807" | 6.2270107   | 7.612562    | 7.089011    | 7.4297976   | 7.243527    | 6.9513583   | 7.3378096   | 6.5047884   |
| "Ai317395" | 7.497402    | 8.214584    | 7.615305    | 7.1858635   | 8.483726    | 8.044624    | 8.450797    | 8.217776    |
| "Ai413582" | 2.9140549   | 2.8134012   | 3.5683002   | 3.2278302   | 2.57511     | 2.619804    | 2.8310766   | 2.6118593   |
| "Ai428936" | 3.94907535  | 3.740033    | 3.90099355  | 3.7330673   | 3.87337835  | 3.625271    | 3.0343424   | 3.7757925   |
| "Ai462493" | 8.080613    | 8.624782    | 8.675408    | 8.7895155   | 8.617869    | 8.90576     | 8.953093    | 8.478694    |
| "Ai464131" | 5.037824    | 6.7815056   | 6.843311    | 7.1061273   | 7.2030854   | 6.5326934   | 7.4153333   | 7.6656857   |
| "Ai503316" | 6.1626727   | 7.86531015  | 7.67600035  | 8.01461635  | 8.0997812   | 8.449058    | 8.343555    | 8.3049782   |
| "Ai504432" | 2.3459811   | 2.3625154   | 2.3294497   | 2.3460402   | 2.3840117   | 2.37304     | 2.3845766   | 2.3636107   |
| "Ai594671" | 2.8940215   | 2.8804789   | 2.7436314   | 2.8003724   | 2.923319    | 2.9234288   | 2.8562958   | 2.9286513   |
| "Ai597479" | 5.6830983   | 5.9780035   | 6.4549417   | 6.2535057   | 6.1783066   | 6.2478085   | 6.234089    | 6.1431665   |
| "Ai646383" | 1.9512048   | 3.1805398   | 3.1087477   | 3.1280348   | 3.3543665   | 3.1516473   | 2.9953046   | 3.648543    |
| "Ai661453" | 3.641855    | 5.404209    | 5.106305    | 5.423341    | 4.876784    | 5.6509414   | 4.9924726   | 5.3825502   |
| "Ai837181" | 5.1935306   | 5.155185    | 5.116036    | 5.1444016   | 5.17436     | 5.1774015   | 5.115304    | 5.2131014   |
| "Ai848100" | 3.3424103   | 2.3915699   | 2.3235412   | 2.3478749   | 2.4130964   | 2.4003115   | 2.4039931   | 2.3993359   |
| "Aida"     | 5.20804645  | 5.0708925   | 6.194359    | 5.89598875  | 5.116683    | 5.00465015  | 5.489408    | 5.24281465  |
| "Aif1"     | 8.580107    | 6.3145323   | 9.735881    | 8.664101    | 7.398888    | 6.6234303   | 8.576561    | 8.163136    |
| "Aif11"    | 3.52195225  | 3.8119349   | 3.46738485  | 3.56912405  | 3.68983245  | 3.8955276   | 3.48040235  | 3.7501323   |
| "Aifm1"    | 9.872524    | 10.310169   | 10.524046   | 10.642298   | 10.60413    | 10.102758   | 11.001274   | 10.987738   |
| "Aig1"     | 6.572621    | 6.295286    | 7.61795     | 6.963347    | 6.195036    | 6.8397117   | 6.8749166   | 6.3915186   |
| "Aim1"     | 7.512451    | 7.4741087   | 7.059013    | 7.0218334   | 6.625642    | 6.8547993   | 6.6469355   | 6.3262444   |
| "Aim2"     | 3.8096583   | 3.7488022   | 3.9435072   | 3.715399    | 3.8406296   | 3.8999195   | 3.7886553   | 3.9039865   |
| "Aimp1"    | 9.956747    | 10.030756   | 9.311916    | 9.194078    | 9.697987    | 10.2507715  | 9.253759    | 9.410723    |
| "Aimp2"    | 6.2215774   | 6.825132    | 6.585311    | 6.5205391   | 6.8212698   | 7.03090625  | 6.58700065  | 6.74199165  |
| "Aip"      | 5.8114305   | 5.520297    | 5.974591    | 5.871156    | 6.0416274   | 6.0667644   | 5.9022393   | 5.9019704   |
| "Aip11"    | 2.805388    | 2.7836113   | 2.740936    | 2.7740984   | 2.8115265   | 2.8093936   | 2.773749    | 2.8051987   |
| "Airm"     | 2.9772897   | 2.936146    | 2.9135506   | 2.9512062   | 3.4290183   | 2.8601892   | 2.9736152   | 2.9569967   |
| "AK010878" | 7.4870114   | 7.1834373   | 6.4218726   | 6.180806    | 6.6762853   | 6.855566    | 6.16729     | 6.421696    |
| "Ak1"      | 3.0236616   | 3.0107489   | 2.8963375   | 2.9445796   | 3.0799255   | 3.0781705   | 2.9899917   | 3.0421941   |
| "Ak2"      | 8.5938153   | 9.723064    | 9.051162    | 9.7622305   | 9.9259885   | 9.492189    | 9.422797    | 10.374715   |
| "Ak3"      | 8.645398333 | 9.029157667 | 8.817425867 | 9.4022891   | 8.985220567 | 8.538616    | 8.926460467 | 9.219203467 |
| "Ak4"      | 5.502042067 | 6.531640833 | 5.614413967 | 7.077212333 | 7.4387499   | 6.73307     | 6.891152167 | 7.913579467 |
| "Akap1"    | 6.783041    | 7.28082     | 7.0457343   | 7.2248023   | 7.4819833   | 7.40788     | 7.38026315  | 7.40845325  |
| "Akap10"   | 3.1382115   | 3.156233    | 3.0056283   | 3.0733626   | 3.1759117   | 3.1750352   | 3.0954216   | 3.1857016   |
| "Akap12"   | 6.8825965   | 4.948311    | 6.2593794   | 5.805693    | 4.226166    | 3.9591014   | 6.4624195   | 4.586102    |
| "Akap17b"  | 3.7450256   | 4.775572    | 5.271849    | 5.249304    | 5.381121    | 4.5051575   | 4.7812977   | 5.470657    |
| "Akap2"    | 5.7124653   | 5.501417    | 5.0072594   | 4.607765    | 5.3443613   | 4.7453117   | 5.136467    | 4.8099327   |
| "Akap4"    | 2.8346076   | 2.821043    | 2.72444155  | 2.7639077   | 2.8632952   | 2.89315285  | 2.80140255  | 2.84664215  |
| "Akap8"    | 7.75230265  | 7.8216703   | 7.58802605  | 7.8693247   | 8.09422535  | 7.948042    | 7.61239165  | 8.1090015   |
| "Akap8l"   | 6.0920353   | 6.356075    | 6.1412067   | 6.2427363   | 6.1446686   | 6.401574    | 6.428652    | 6.6846      |
| "Akap9"    | 7.41942825  | 7.734858    | 7.2096255   | 7.7850295   | 7.79577545  | 8.0702425   | 7.59767035  | 7.9276167   |
| "Akirin1"  | 9.720229    | 9.632241    | 9.1517905   | 9.0688735   | 9.38866275  | 9.4716395   | 8.9789055   | 9.1736065   |
| "Akirin2"  | 9.118713    | 8.87508     | 8.646624    | 8.801456    | 8.804017    | 9.061277    | 8.95083     | 9.138521    |
| "Akna"     | 4.14847555  | 3.7959396   | 5.020952    | 4.1748116   | 3.9108185   | 3.6850951   | 3.9768318   | 3.8763455   |
| "Akr1a1"   | 12.5228095  | 12.49364875 | 12.962798   | 12.918627   | 12.757644   | 12.4846095  | 12.8772485  | 12.82923025 |
| "Akr1b10"  | 2.93461765  | 2.7835678   | 3.09583975  | 2.73826     | 2.7887052   | 2.7878499   | 3.02874335  | 2.8096149   |
| "Akr1b3"   | 7.533586667 | 6.548699767 | 8.336742167 | 7.364835    | 7.034402967 | 6.193709533 | 7.572206133 | 6.6999613   |
| "Akr1b7"   | 6.805457    | 4.56415     | 7.598533    | 6.0152054   | 5.7419415   | 5.8163376   | 6.0423346   | 4.505633    |
| "Akr1b8"   | 5.954616    | 5.891293    | 6.5827947   | 6.5159492   | 5.1720457   | 5.306085    | 6.404339    | 5.9392934   |
| "Akr1c12"  | 10.38610325 | 10.635531   | 11.0237895  | 11.1702015  | 10.9217765  | 10.5979355  | 11.144378   | 11.4170595  |
| "Akr1c13"  | 10.357319   | 10.318123   | 11.131513   | 11.099533   | 10.796108   | 10.522655   | 11.214686   | 11.361592   |
| "Akr1c14"  | 10.74127    | 11.199555   | 11.489637   | 12.4437685  | 11.718456   | 10.740865   | 12.553984   | 12.667304   |
| "Akr1c18"  | 2.715325    | 2.7944477   | 4.1980114   | 3.097612    | 2.8156414   | 2.7973206   | 2.8171005   | 2.8008661   |
| "Akr1c20"  | 7.0853128   | 6.7721191   | 9.0687705   | 8.5729733   | 8.3888723   | 6.1678828   | 9.36516625  | 8.4549035   |
| "Akr1c6"   | 11.495665   | 11.903191   | 13.80168    | 13.899487   | 13.35378    | 11.562522   | 14.037366   | 13.926192   |
| "Akr1d1"   | 8.6763982   | 8.962884    | 10.6305705  | 10.67007    | 10.23770475 | 8.5103535   | 10.767562   | 10.186522   |
| "Akr1e1"   | 7.3531575   | 7.3632107   | 8.257969    | 8.310542    | 7.950682    | 7.5744076   | 8.475871    | 8.459836    |
| "Akr7a5"   | 9.636171    | 10.440778   | 10.100429   | 10.2676945  | 10.442831   | 10.2635375  | 10.2228795  | 10.4906065  |
| "Akt1"     | 5.31101415  | 4.8105281   | 4.82842585  | 4.971067    | 5.12783945  | 4.7438645   | 4.7777318   | 4.8008594   |
| "Akt2"     | 5.13755855  | 5.09223345  | 5.2354295   | 5.2298178   | 5.1336837   | 5.050369    | 5.2599025   | 5.1537005   |

|             |             |             |             |             |             |             |             |             |
|-------------|-------------|-------------|-------------|-------------|-------------|-------------|-------------|-------------|
| "Akt3"      | 2.5274432   | 2.4941828   | 2.4328935   | 2.47823     | 2.5141568   | 2.5104268   | 2.5108988   | 2.5062544   |
| "Aktip"     | 4.366448567 | 4.440213933 | 4.325516167 | 4.469831533 | 4.564290867 | 4.786303033 | 5.0158754   | 4.834603567 |
| "Alad"      | 8.682236    | 9.997491    | 10.78058    | 10.807483   | 10.779222   | 9.3528385   | 11.423583   | 11.227741   |
| "Alas1"     | 10.5678915  | 12.03559275 | 10.79548675 | 11.114196   | 11.906642   | 11.52477575 | 10.334199   | 12.0358885  |
| "Alas2"     | 6.4378986   | 6.0149107   | 5.554799    | 6.634961    | 5.8875823   | 5.8204494   | 5.752034    | 5.7806416   |
| "Alb"       | 15.642994   | 15.780238   | 15.763469   | 15.762792   | 15.876952   | 15.902616   | 15.667877   | 15.774296   |
| "Alcam"     | 8.0892095   | 7.0416532   | 9.0514755   | 8.29696025  | 7.521305    | 7.5719585   | 8.283177    | 8.403005    |
| "Aldh16a1"  | 7.4614563   | 7.573658    | 7.08455     | 7.485562    | 7.7113686   | 7.4469543   | 7.0975814   | 7.3392916   |
| "Aldh18a1"  | 3.10843828  | 2.54793764  | 3.34805926  | 2.7629406   | 2.57072666  | 2.68193414  | 3.0118949   | 2.7713737   |
| "Aldh1a1"   | 12.4111373  | 13.260712   | 13.586422   | 14.130839   | 13.371241   | 12.881962   | 13.306251   | 13.837052   |
| "Aldh1a3"   | 2.472421467 | 2.444771867 | 2.564991267 | 2.414017533 | 2.4820216   | 2.465793133 | 2.458419167 | 2.456561867 |
| "Aldh1a7"   | 11.662424   | 12.487767   | 13.353436   | 13.051157   | 10.985794   | 11.180774   | 12.11875    | 12.788494   |
| "Aldh1b1"   | 6.358654    | 5.637181    | 9.677121    | 7.5267572   | 7.383562    | 6.341446    | 8.614407    | 7.220175    |
| "Aldh1l1"   | 9.40387925  | 9.7326      | 9.767713    | 9.6439337   | 8.7893594   | 8.4715445   | 8.8472227   | 8.9819335   |
| "Aldh2"     | 9.451143333 | 9.604814767 | 9.1438251   | 9.609028    | 9.919047233 | 9.3968974   | 9.690442067 | 9.555567667 |
| "Aldh3a1"   | 2.7629411   | 2.730051    | 2.6531508   | 2.6895695   | 2.7547255   | 2.7503693   | 2.7552652   | 2.7703905   |
| "Aldh3a2"   | 8.320229    | 9.35626     | 9.162464    | 10.127069   | 10.749811   | 9.617712    | 10.984244   | 10.098715   |
| "Aldh3b1"   | 4.1570544   | 4.102844    | 5.2939024   | 4.1513743   | 4.026013    | 4.046087    | 4.3163114   | 4.200061    |
| "Aldh4a1"   | 5.2769346   | 5.0512505   | 6.032608    | 5.963107    | 5.4089537   | 5.0221405   | 5.747015    | 5.978196    |
| "Aldh6a1"   | 12.451606   | 12.447356   | 12.20943    | 12.492698   | 12.518799   | 12.412445   | 12.950278   | 12.492278   |
| "Aldh7a1"   | 7.2606427   | 7.65840165  | 7.3386165   | 7.7952858   | 7.4984881   | 7.5873016   | 7.51938075  | 7.6725265   |
| "Aldh8a1"   | 10.669518   | 10.967981   | 11.3077425  | 11.1937665  | 11.3955775  | 11.104115   | 11.356306   | 11.396905   |
| "Aldh9a1"   | 11.0816145  | 12.2952615  | 11.557875   | 12.257935   | 12.3136375  | 12.0190955  | 12.4467265  | 12.323526   |
| "Aldoa"     | 9.3847385   | 9.38949425  | 8.929970425 | 8.762841875 | 8.841858125 | 9.39296025  | 8.45527985  | 9.1463065   |
| "Aldoart1"  | 3.1034229   | 3.1024144   | 2.917058    | 3.042214    | 3.2666807   | 3.1590028   | 3.0459583   | 3.2282743   |
| "Aldoart2"  | 2.6980314   | 2.6702464   | 2.6482356   | 2.6170018   | 2.7011278   | 2.6964521   | 2.6771173   | 2.6883245   |
| "Aldob"     | 14.058208   | 14.72713    | 14.096839   | 14.370291   | 15.060282   | 14.730178   | 14.3838625  | 14.465758   |
| "Aldoc"     | 4.7682567   | 5.4396097   | 5.39745535  | 5.5282585   | 4.16544275  | 3.6581435   | 4.490991    | 5.4284022   |
| "Alg1"      | 7.8388853   | 7.617045    | 7.377998    | 7.404643    | 7.545723    | 8.117413    | 7.5510526   | 7.546898    |
| "Alg12"     | 2.7629769   | 3.0566455   | 2.8353409   | 2.94807685  | 3.85651465  | 3.2097006   | 2.9745866   | 2.89942075  |
| "Alg13"     | 5.7005033   | 5.434659    | 5.5558195   | 5.7092023   | 5.3196063   | 5.3235817   | 6.061134    | 5.8348203   |
| "Alg14"     | 4.925734867 | 4.9700086   | 4.9163024   | 5.009874067 | 5.129646967 | 4.989409967 | 5.382385533 | 5.131091833 |
| "Alg2"      | 5.0235205   | 6.0425644   | 5.448409    | 5.753113    | 6.5608025   | 4.7832155   | 5.83235     | 6.296541    |
| "Alg3"      | 3.722809    | 4.451086    | 4.332481    | 4.422984    | 4.357592    | 4.3550935   | 4.3655725   | 4.5571632   |
| "Alg5"      | 7.614627    | 8.465941    | 8.289062    | 8.176819    | 8.239644    | 8.262578    | 8.2363      | 8.548153    |
| "Alg9"      | 5.9980974   | 6.2630215   | 6.8233256   | 6.8266      | 5.9942803   | 6.1378274   | 6.561531    | 6.0674314   |
| "Alkbh4"    | 3.291202067 | 3.128692033 | 3.246988    | 3.166869467 | 3.2378122   | 3.322216767 | 3.192160133 | 3.173494633 |
| "Alkbh5"    | 8.101377    | 7.8891907   | 7.890217    | 7.984631    | 7.815629    | 7.8764863   | 7.70095     | 7.6491766   |
| "Alox12"    | 2.686469    | 2.4082406   | 2.3566463   | 2.4411712   | 2.6646562   | 2.712931    | 2.818292    | 2.6423516   |
| "Alox12e"   | 2.620805    | 2.588657    | 2.5370018   | 2.562529    | 2.6618302   | 2.596638    | 2.6096191   | 2.5933685   |
| "Alox5ap"   | 8.995575    | 7.75039     | 8.495077    | 7.22527     | 7.7484946   | 7.4201255   | 7.0608606   | 6.23141     |
| "Alpl"      | 2.5124664   | 2.7575755   | 2.41684     | 2.448888    | 3.235954    | 2.4964154   | 2.5011754   | 2.486259    |
| "Als2"      | 4.66098375  | 5.58307885  | 5.77956     | 5.75552615  | 6.00544385  | 5.79434835  | 5.9756845   | 6.00446875  |
| "Alx3"      | 2.526008    | 2.4983373   | 2.4128675   | 2.4547286   | 2.5196772   | 2.5379143   | 2.511447    | 2.523453    |
| "Alyref"    | 8.5484705   | 8.6568465   | 8.9379225   | 8.383105    | 8.417489    | 8.1031645   | 8.3571815   | 8.0827765   |
| "Amacr"     | 10.23606    | 10.649295   | 10.880814   | 11.196956   | 11.21301    | 11.040835   | 11.589954   | 11.679294   |
| "Ambn"      | 2.3926475   | 2.362664    | 2.3014922   | 2.3243594   | 2.3872337   | 2.3807485   | 2.3801572   | 2.3756917   |
| "Ambp"      | 14.77317    | 14.6218605  | 15.00277    | 14.709064   | 14.781329   | 14.914189   | 14.675889   | 14.832742   |
| "Ambra1"    | 6.264989    | 6.324415    | 6.457818    | 6.4115434   | 6.247919    | 6.2048993   | 6.5165486   | 6.2324815   |
| "Amd1"      | 7.6041042   | 8.3341108   | 8.666144    | 8.4597642   | 8.56144465  | 7.533319    | 7.7898705   | 8.55075615  |
| "Amdhd1"    | 10.326654   | 10.102759   | 10.70733    | 10.845131   | 10.536061   | 10.640105   | 11.541554   | 11.456694   |
| "Amelx"     | 2.5672295   | 2.5537627   | 2.5082624   | 2.515239    | 2.5710852   | 2.578199    | 2.5756924   | 2.558089    |
| "Amfr"      | 10.952745   | 11.093724   | 10.767374   | 10.857626   | 10.945957   | 10.924959   | 10.567318   | 10.720642   |
| "Ammeocr1"  | 2.6930268   | 2.6713872   | 2.5642421   | 2.627257    | 2.6988754   | 2.7013721   | 2.6715548   | 2.698695    |
| "Ammeocr1l" | 8.934593867 | 8.324867367 | 8.329819333 | 8.589991667 | 8.535977133 | 8.5308665   | 8.4320619   | 8.476597333 |
| "Amot"      | 3.9193193   | 4.326097733 | 4.3922248   | 4.477562333 | 4.268055167 | 4.301518033 | 4.2298217   | 4.506716567 |
| "Amotl2"    | 6.638041    | 7.353944    | 7.404682    | 7.435524    | 7.1084228   | 7.3171854   | 7.5696535   | 7.358203    |
| "Ampd2"     | 6.62457535  | 6.4580155   | 6.7905362   | 6.66646125  | 6.8320485   | 7.18061665  | 7.3081565   | 7.10884125  |
| "Ampd3"     | 4.6411457   | 5.0673337   | 4.8924646   | 4.524587    | 5.2689476   | 4.82684     | 4.781018    | 4.1182866   |
| "Amph"      | 2.9791448   | 2.9683738   | 2.8465748   | 2.8780165   | 3.0169454   | 3.0169716   | 2.9523191   | 3.0238395   |
| "Amy1"      | 11.680722   | 12.035922   | 11.79276    | 12.085943   | 12.537175   | 12.401439   | 12.280232   | 12.069021   |
| "Amy2a1"    | 3.0454488   | 3.0439007   | 2.8778129   | 2.9388494   | 3.0994956   | 3.0946455   | 3.0036707   | 3.1051269   |
| "Amz2"      | 4.0536399   | 4.9200965   | 4.47788485  | 5.275312    | 4.55416965  | 4.8083589   | 4.7223021   | 4.83805385  |
| "Anapc1"    | 5.1163754   | 4.83142185  | 5.1658456   | 5.14724365  | 4.8536804   | 4.91082405  | 5.02852655  | 5.05498515  |
| "Anapc11"   | 5.42436     | 5.598015    | 5.440186    | 5.8622627   | 5.560252    | 5.160485    | 5.801621    | 6.0247936   |
| "Anapc13"   | 10.023782   | 10.389091   | 10.539369   | 10.564471   | 10.362563   | 10.171681   | 10.519426   | 10.443564   |
| "Anapc16"   | 7.16145835  | 6.98726135  | 5.970672    | 6.10347235  | 6.630251675 | 6.915998925 | 6.197044625 | 6.245819875 |
| "Anapc2"    | 7.235262    | 7.5802655   | 7.684448    | 7.846975    | 7.8168936   | 7.1661496   | 7.835714    | 7.571536    |
| "Anapc4"    | 6.992111    | 7.3171952   | 7.57934875  | 7.1862325   | 7.14858325  | 7.2749215   | 7.554368    | 6.72639485  |
| "Anapc5"    | 8.266562133 | 8.49317405  | 8.584258867 | 8.394894567 | 8.161170583 | 8.134782383 | 8.28196195  | 8.278918283 |
| "Anapc7"    | 8.030652    | 7.8927755   | 7.7017946   | 7.7625737   | 8.081638    | 8.083239    | 7.731034    | 7.9781766   |
| "Ang"       | 13.059794   | 11.114608   | 12.658278   | 12.396297   | 11.901445   | 11.107493   | 11.450413   | 12.122021   |
| "Ang2"      | 3.3148644   | 3.2967458   | 3.1370902   | 3.2169423   | 3.424884    | 3.3070025   | 3.2709794   | 3.435419    |
| "Ang3"      | 2.423698    | 2.3888917   | 2.3400226   | 2.3633707   | 2.4084888   | 2.3982286   | 2.3965364   | 2.3959603   |
| "Angel1"    | 2.7573347   | 2.7473326   | 2.7357197   | 2.888633    | 2.755468    | 2.7465487   | 2.9028215   | 2.7449634   |
| "Angel2"    | 4.59234478  | 4.9411614   | 4.94710838  | 4.94150474  | 4.97459712  | 5.04706712  | 4.9435155   | 4.89470774  |
| "Angpt2"    | 3.9421396   | 3.916736    | 3.8651094   | 3.9116843   | 3.935468    | 4.090678    | 3.9124684   | 3.953102    |
| "Angpt4"    | 2.4200938   | 2.3838708   | 2.3268015   | 2.3431177   | 2.408417    | 2.401656    | 2.4005184   | 2.3938394   |
| "Angptl1"   | 2.693151    | 2.5526989   | 2.5706697   | 2.53752     | 2.5723567   | 2.6422834   | 2.5195916   | 2.5632248   |
| "Angptl2"   | 4.56231925  | 4.6562738   | 4.8327542   | 5.041965    | 4.87279135  | 4.54230175  | 5.2963544   | 5.0294756   |
| "Angptl3"   | 12.346685   | 12.348363   | 13.113631   | 13.174894   | 13.141888   | 12.747137   | 13.127015   | 12.9456215  |

|            |             |             |             |             |             |             |             |             |
|------------|-------------|-------------|-------------|-------------|-------------|-------------|-------------|-------------|
| "Angptl4"  | 10.213681   | 7.1607331   | 5.0851624   | 6.3969279   | 7.35040425  | 7.5005936   | 6.56198685  | 6.773759    |
| "Angptl6"  | 5.7218623   | 5.675744    | 6.485732    | 6.657224    | 5.5974727   | 5.5227847   | 7.1852183   | 6.446943    |
| "Angptl7"  | 2.3815203   | 2.3641882   | 2.3354826   | 2.3523989   | 2.3840442   | 2.3949177   | 2.446528    | 2.3787522   |
| "Ank"      | 7.387858    | 8.045164    | 6.9503775   | 8.177573    | 8.724909    | 7.9677396   | 7.9751954   | 8.162783    |
| "Ank1"     | 2.5512395   | 2.521778    | 2.4494858   | 2.4735746   | 2.551853    | 2.5483856   | 2.5333362   | 2.5493042   |
| "Ank3"     | 6.3867034   | 6.2942822   | 7.889314    | 7.740758367 | 5.888224533 | 5.511178067 | 6.319017233 | 6.4046811   |
| "Ankfy1"   | 7.2715473   | 6.8957663   | 7.7728806   | 7.463972    | 6.872034    | 6.831436    | 7.4598217   | 7.0182495   |
| "Ankhd1"   | 7.3786825   | 7.2439852   | 7.4308375   | 7.290612    | 7.45433375  | 7.42546635  | 7.30211325  | 7.305225    |
| "Ankib1"   | 6.1715685   | 6.44508815  | 6.017273    | 6.05723975  | 6.462802    | 6.38128615  | 6.3028285   | 6.4004773   |
| "Ankmy2"   | 3.3601066   | 3.3283138   | 3.59093955  | 3.77301025  | 3.325427    | 3.20533445  | 3.5957222   | 3.47555915  |
| "Ankra2"   | 3.86295     | 4.7083573   | 4.205565    | 4.0734653   | 4.4535804   | 5.3137255   | 4.5754514   | 4.379894    |
| "Ankrd10"  | 7.68904565  | 6.9102067   | 6.89684275  | 6.9221445   | 7.14167     | 7.054859    | 7.13718135  | 6.870322    |
| "Ankrd12"  | 2.8581872   | 2.8241303   | 2.7226465   | 2.762896    | 2.8439558   | 2.8913682   | 2.8068478   | 2.8286932   |
| "Ankrd13a" | 7.981771    | 7.2258196   | 8.000002    | 7.2252865   | 7.4270444   | 7.602943    | 7.6287546   | 7.1250367   |
| "Ankrd13c" | 10.667501   | 9.207642    | 8.9894705   | 9.512822    | 9.081581    | 9.080226    | 9.2795515   | 9.054542    |
| "Ankrd17"  | 6.03293172  | 6.32136778  | 6.04394802  | 6.0554616   | 6.19545978  | 6.12642848  | 6.08276916  | 6.13190206  |
| "Ankrd2"   | 2.3743298   | 2.3407223   | 2.3071404   | 2.3252277   | 2.3598742   | 2.3510857   | 2.358618    | 2.3452606   |
| "Ankrd22"  | 2.72041545  | 2.7467101   | 2.60606695  | 2.63783805  | 2.73483375  | 2.74468985  | 2.6932843   | 2.78433165  |
| "Ankrd24"  | 3.940369333 | 3.9897511   | 3.922907    | 4.043031767 | 3.9493862   | 3.898314533 | 3.981241333 | 3.981499367 |
| "Ankrd26"  | 3.5499775   | 3.5757647   | 3.522099    | 3.557179    | 3.6033099   | 3.6585667   | 3.5988889   | 3.671242    |
| "Ankrd28"  | 7.915144    | 8.636768    | 7.890457    | 8.420465    | 8.63163     | 8.719062    | 8.344894    | 8.734692    |
| "Ankrd32"  | 4.6759715   | 5.006635    | 5.251704    | 5.3200493   | 4.6922107   | 4.6892138   | 5.115067    | 5.162107    |
| "Ankrd33b" | 10.06323    | 9.033638    | 6.6479125   | 8.308399    | 7.179907    | 8.293007    | 7.1074424   | 7.5606327   |
| "Ankrd36"  | 2.783858    | 2.764906    | 2.6549356   | 2.7468553   | 2.8102143   | 2.776143    | 2.7702203   | 2.7886934   |
| "Ankrd40"  | 5.963166    | 6.54730615  | 6.35857985  | 6.07050465  | 5.89958545  | 6.0710385   | 6.25897145  | 6.2964405   |
| "Ankrd44"  | 7.1158457   | 7.1738847   | 7.5970397   | 6.9766965   | 6.804359    | 6.713414    | 7.129885    | 6.109399    |
| "Ankrd46"  | 6.249524    | 7.344527    | 7.2674174   | 7.372866    | 7.616406    | 7.5639877   | 7.5854535   | 7.297991    |
| "Ankrd49"  | 6.232611    | 6.4590607   | 5.562124    | 6.353479    | 6.157065    | 6.216655    | 6.236081    | 5.9544954   |
| "Ankrd5"   | 2.4510794   | 2.4202847   | 2.3747854   | 2.3996453   | 2.4403572   | 2.436079    | 2.4426599   | 2.429709    |
| "Ankrd54"  | 3.87835095  | 3.47028635  | 3.50636385  | 3.4407747   | 3.5434145   | 3.86484935  | 3.54309485  | 3.55902445  |
| "Ankrd6"   | 2.4297047   | 2.4016638   | 2.3698628   | 2.38576     | 2.4227145   | 2.413402    | 2.6866765   | 2.4081383   |
| "Anks1"    | 2.546193    | 1.895886    | 2.1011152   | 1.8805199   | 1.8843021   | 1.8993235   | 1.907899    | 1.9004087   |
| "Anks3"    | 3.8438075   | 3.8117735   | 3.7500243   | 3.7903395   | 4.4482384   | 3.9419744   | 3.8508813   | 4.075138    |
| "Ankzf1"   | 3.713004583 | 3.8978268   | 3.726136983 | 3.941774267 | 3.835297783 | 3.928604733 | 3.784662667 | 3.8924582   |
| "Anln"     | 2.7674522   | 2.7169538   | 2.6442404   | 2.6837697   | 2.738971    | 2.5589774   | 3.649762    | 2.7248387   |
| "Ano1"     | 2.6928055   | 2.6547801   | 2.5583496   | 2.6012852   | 2.677001    | 2.6834545   | 2.6447804   | 2.6883538   |
| "Ano10"    | 5.532045    | 5.5010834   | 5.646365    | 5.6209407   | 5.5156775   | 5.51639     | 5.4759674   | 5.1987305   |
| "Anp32a"   | 7.590201833 | 8.054538667 | 8.30799     | 8.575119    | 8.322910233 | 7.6880724   | 8.6932128   | 8.013044867 |
| "Anp32b"   | 10.698017   | 10.695274   | 10.350324   | 10.087127   | 10.393382   | 10.754767   | 10.255411   | 10.335484   |
| "Anp32e"   | 7.391363    | 7.59735895  | 7.66322995  | 7.0662785   | 7.4170351   | 6.995406    | 7.40217015  | 7.0428502   |
| "Anpep"    | 3.5747867   | 4.2857      | 5.1315084   | 5.2417393   | 4.795661    | 4.337391    | 4.8028946   | 5.330902    |
| "Antxr1"   | 3.8268282   | 3.02289     | 3.8167813   | 3.5059574   | 3.4144998   | 3.414009    | 4.2281146   | 3.436975    |
| "Antxr2"   | 9.190041    | 9.53207     | 9.10895     | 9.866627    | 9.101276    | 8.90523     | 8.953325    | 8.90074     |
| "Anxa1"    | 9.190422    | 7.7002206   | 8.804947    | 7.9355326   | 7.527887    | 7.7255173   | 7.7068815   | 7.447603    |
| "Anxa10"   | 2.421192    | 2.4033847   | 2.32136     | 2.385143    | 2.423106    | 2.4146216   | 2.4103386   | 2.407355    |
| "Anxa11"   | 6.527879    | 6.726516    | 6.855727    | 6.8372507   | 6.867797    | 6.258626    | 6.957624    | 6.774352    |
| "Anxa13"   | 2.6881902   | 2.6617343   | 2.5760193   | 2.6529946   | 2.6746106   | 2.6725771   | 2.6896923   | 2.667515    |
| "Anxa2"    | 4.542789167 | 4.015215233 | 4.671766733 | 4.3740171   | 4.079723033 | 3.808880167 | 4.453812833 | 4.301562433 |
| "Anxa3"    | 7.746052    | 6.2921014   | 8.234464    | 7.28102     | 7.1163797   | 7.0675635   | 7.301573    | 6.659924    |
| "Anxa4"    | 7.01225935  | 7.34824525  | 8.4965482   | 7.914667    | 7.815775    | 7.21929835  | 8.29144835  | 8.302085    |
| "Anxa5"    | 10.704618   | 9.705596    | 11.049994   | 10.954245   | 9.949096    | 10.015516   | 10.655929   | 10.429969   |
| "Anxa6"    | 4.8734079   | 5.152355633 | 5.065148267 | 4.9601645   | 4.8362286   | 4.960320533 | 4.916102333 | 4.683534067 |
| "Anxa7"    | 7.318552567 | 7.990370067 | 8.101535667 | 8.220654567 | 8.013339667 | 7.786574133 | 8.024475167 | 8.394682667 |
| "Anxa8"    | 2.7245588   | 2.536766    | 2.5000768   | 2.5126965   | 2.5836024   | 2.5485148   | 2.5418756   | 2.5416021   |
| "Aoah"     | 4.3432016   | 2.322292    | 3.5658636   | 3.3698866   | 2.4504514   | 2.4887836   | 2.4652436   | 2.4508932   |
| "Aoc3"     | 2.6588652   | 2.6113462   | 2.5533152   | 2.557117    | 2.6529422   | 2.641666    | 2.6488557   | 2.6335793   |
| "Aox1"     | 8.917216    | 9.871888    | 10.455675   | 10.290124   | 9.634       | 8.959215    | 9.737632    | 9.662669    |
| "Aox3"     | 8.131322    | 9.151486    | 9.825265    | 10.42236    | 9.544379    | 7.9785614   | 10.430601   | 11.319223   |
| "Ap1ar"    | 8.613034    | 8.48046     | 8.485409    | 8.502632    | 8.499304    | 8.457896    | 8.532897    | 8.586857    |
| "Ap1b1"    | 6.700162    | 6.575254    | 6.7681475   | 6.4393063   | 6.727528    | 6.5127215   | 6.759821    | 6.473277    |
| "Ap1g1"    | 4.2980454   | 4.5452778   | 4.74756475  | 4.39110275  | 4.3528312   | 4.6006545   | 4.66247535  | 4.23523605  |
| "Ap1g2"    | 5.6682115   | 5.6212993   | 5.6812263   | 5.605168    | 5.65372     | 5.645046    | 5.6042156   | 6.077434    |
| "Ap1m1"    | 4.9413953   | 5.1098337   | 5.256996    | 5.2724075   | 5.4172163   | 5.3503976   | 5.334438    | 5.166664    |
| "Ap1m2"    | 2.3637981   | 2.335217    | 2.3134441   | 2.3267539   | 2.3550775   | 2.3489306   | 2.351056    | 2.3422682   |
| "Ap1s1"    | 6.4193187   | 7.064754    | 7.5528064   | 7.220941    | 7.0695333   | 6.9854226   | 7.2005024   | 7.1860685   |
| "Ap1s2"    | 3.791797867 | 3.338068467 | 3.554063367 | 3.432253033 | 3.195779467 | 3.5984384   | 3.372864267 | 3.1924868   |
| "Ap2a1"    | 3.4940166   | 3.4762506   | 3.1215808   | 3.4646134   | 3.5155487   | 3.6505296   | 3.3156009   | 3.4799027   |
| "Ap2a2"    | 6.64446584  | 6.07965222  | 6.09608834  | 6.10844196  | 6.27053502  | 6.42846228  | 5.94545842  | 5.81822222  |
| "Ap2b1"    | 5.52004495  | 5.743191    | 5.91144085  | 5.95137715  | 5.9243188   | 5.8643055   | 5.84406465  | 5.835271    |
| "Ap2m1"    | 8.444973    | 9.376272    | 9.520284    | 9.272175    | 9.2242985   | 9.269789    | 9.011454    | 9.294975    |
| "Ap2s1"    | 9.119729    | 9.274486    | 9.367288    | 9.370856    | 8.965898    | 8.985296    | 9.286772    | 9.029417    |
| "Ap3b1"    | 8.61019325  | 8.4778455   | 8.59070975  | 8.7796095   | 8.2557105   | 8.636926    | 8.3482875   | 8.7831365   |
| "Ap3b2"    | 2.65020025  | 2.62616255  | 2.52955855  | 2.5836625   | 2.65628435  | 2.68132175  | 2.64491235  | 2.649649    |
| "Ap3d1"    | 9.3002269   | 8.875103    | 9.078133    | 8.983643    | 8.92651     | 9.292857    | 8.561055    | 8.547315    |
| "Ap3m1"    | 5.8986384   | 6.9316036   | 6.710208075 | 7.232923175 | 7.6549504   | 7.297518    | 7.179094875 | 7.413419575 |
| "Ap3m2"    | 2.7011938   | 2.6685252   | 3.381523    | 2.8282754   | 2.6035478   | 2.4796019   | 3.235513    | 2.6708684   |
| "Ap3s1"    | 10.296234   | 10.204839   | 10.197671   | 10.240677   | 10.169533   | 10.388038   | 10.403867   | 10.408107   |
| "Ap3s2"    | 2.91089     | 3.0142492   | 3.01194695  | 2.94371295  | 3.0449098   | 3.0967061   | 3.17579935  | 3.28911625  |
| "Ap4b1"    | 6.8949285   | 7.0300565   | 6.7827086   | 6.407187    | 6.842731    | 6.959957    | 6.7661      | 6.248283    |
| "Ap4m1"    | 2.4317183   | 2.4287221   | 2.4017673   | 2.4085152   | 2.3960688   | 2.3902376   | 2.4006007   | 2.4016123   |
| "Ap4s1"    | 8.212186    | 8.580288    | 8.423334    | 8.537565    | 8.184266    | 8.267493    | 8.298824    | 8.489101    |

|            |             |             |             |             |             |             |             |             |
|------------|-------------|-------------|-------------|-------------|-------------|-------------|-------------|-------------|
| "Apaf1"    | 6.279923    | 5.3126006   | 6.840581    | 6.4676228   | 6.0965476   | 6.0580144   | 5.630662    | 5.591198    |
| "Apba3"    | 6.810622    | 6.8850493   | 6.303334    | 6.222367    | 6.6039534   | 7.017102    | 6.117193    | 6.668273    |
| "Apbb1"    | 2.6460357   | 2.62029     | 2.5565236   | 2.5664315   | 2.642892    | 2.6397617   | 2.6166363   | 2.655287    |
| "Apbb2"    | 6.11049165  | 6.1785982   | 5.90974885  | 6.0220497   | 5.6427109   | 5.9081198   | 6.00593965  | 6.16790725  |
| "Apbb3"    | 3.6352856   | 3.006044    | 2.9751537   | 3.0939841   | 3.0219684   | 3.2991629   | 2.636066    | 2.632993    |
| "Apc"      | 4.716612733 | 4.448132433 | 4.3328881   | 4.441101467 | 4.570496233 | 4.678384833 | 4.579804433 | 4.5834148   |
| "Apccd1"   | 2.722269475 | 2.70618525  | 2.61945465  | 2.639655975 | 2.7398505   | 2.755963    | 2.70069095  | 2.767733725 |
| "Apcs"     | 13.07441    | 12.838793   | 13.526608   | 12.399195   | 12.243388   | 13.173296   | 11.48343    | 12.050952   |
| "Apeh"     | 8.916669    | 8.8406725   | 9.068284    | 9.105418    | 9.279762    | 9.005481    | 9.031524    | 9.310581    |
| "Apex1"    | 7.504241767 | 7.760575    | 7.764795    | 7.287909667 | 7.577762667 | 7.599087833 | 7.2812947   | 7.608611867 |
| "Apex2"    | 2.5980026   | 2.66432225  | 2.5330514   | 2.5457649   | 2.63474965  | 2.61392235  | 2.6263924   | 2.7102337   |
| "Aph1a"    | 6.736292    | 7.725939667 | 7.014070267 | 7.285218133 | 7.848332    | 7.561589833 | 7.295255733 | 7.506579767 |
| "Api5"     | 6.9768061   | 6.878436075 | 6.637325225 | 6.6465063   | 6.903855225 | 6.882352925 | 6.8303835   | 6.7102875   |
| "Apip"     | 7.2209606   | 8.076691    | 8.528325    | 8.359813    | 7.738172    | 7.728759    | 7.674727    | 7.829802    |
| "Aplf"     | 2.7339964   | 2.80748915  | 2.88137325  | 2.7644348   | 2.88705455  | 2.84724285  | 2.81989385  | 2.9908601   |
| "Apln"     | 2.5418754   | 2.5135884   | 2.4507868   | 2.499163    | 2.5356996   | 2.528038    | 2.5316849   | 2.533279    |
| "Aplnr"    | 2.5141203   | 2.4905057   | 2.4404411   | 2.4550948   | 2.4993157   | 2.489801    | 2.4991496   | 2.4847364   |
| "Aplp2"    | 6.6134881   | 6.82153064  | 6.9258501   | 7.06915698  | 6.9193518   | 6.6328898   | 6.597399    | 6.78742526  |
| "Apos1"    | 14.80432675 | 15.402564   | 15.214515   | 14.80664725 | 15.1279635  | 15.2773125  | 14.8773965  | 15.1159995  |
| "Apoa1bp"  | 9.382542    | 10.201772   | 10.358437   | 10.376499   | 9.993931    | 9.675438    | 10.275278   | 10.138183   |
| "Apoa2"    | 15.022438   | 15.311881   | 15.191332   | 15.259861   | 15.412929   | 15.313247   | 15.19628    | 15.286318   |
| "Apoa4"    | 10.44917    | 12.253499   | 9.060469    | 9.3864755   | 11.8348845  | 12.0759545  | 10.54689325 | 9.8280275   |
| "Apoa5"    | 13.959065   | 13.856956   | 11.886409   | 12.656023   | 14.5011015  | 14.29992    | 13.057442   | 13.482198   |
| "Apob"     | 14.231142   | 14.55276    | 14.377258   | 14.710868   | 14.73816    | 14.722086   | 14.614485   | 14.679289   |
| "Apobec1"  | 8.335631    | 7.688463    | 8.348436    | 8.373875    | 7.639742    | 7.9755526   | 7.710862    | 7.978734    |
| "Apobec2"  | 2.412308    | 2.3848217   | 2.3177683   | 2.4194145   | 2.409594    | 2.4033074   | 2.4148985   | 2.4110694   |
| "Apobec3"  | 2.7454748   | 2.7523134   | 3.0698366   | 3.295567    | 2.770717    | 2.7605822   | 2.7470808   | 2.78538     |
| "Apobr"    | 2.8344154   | 2.7860813   | 4.0635004   | 3.1856935   | 2.780662    | 2.792266    | 2.7952127   | 2.4346406   |
| "Apoc1"    | 14.086357   | 14.33359    | 14.210551   | 14.3657465  | 14.525499   | 14.407359   | 14.418255   | 14.444144   |
| "Apoc2"    | 10.9823     | 11.945765   | 11.9901705  | 11.568166   | 12.2184     | 11.529286   | 12.254073   | 12.08668    |
| "Apoc3"    | 14.25329    | 14.776054   | 14.262227   | 14.653434   | 15.116678   | 14.7502575  | 14.700087   | 14.747383   |
| "Apoc4"    | 12.383798   | 12.958735   | 12.895555   | 12.879072   | 13.209178   | 13.139053   | 13.203796   | 12.987499   |
| "Apod"     | 2.5285997   | 2.5017276   | 2.4324892   | 2.4727418   | 2.5172973   | 2.5237758   | 2.5101643   | 2.5177414   |
| "Apoe"     | 14.445826   | 14.643002   | 14.640007   | 14.633207   | 14.905292   | 14.815463   | 14.7275     | 14.798382   |
| "Apof"     | 13.358364   | 13.695265   | 14.042593   | 13.840109   | 13.939892   | 13.853052   | 13.826459   | 13.922756   |
| "ApoH"     | 14.56093    | 14.797134   | 14.652974   | 14.713278   | 14.98624    | 14.951055   | 14.81655    | 14.7965355  |
| "Apol9a"   | 9.455581    | 8.900458    | 10.71516    | 10.723103   | 7.9018345   | 8.0292      | 8.349245    | 9.495688    |
| "Apom"     | 12.5257585  | 12.7514165  | 12.9109825  | 13.131762   | 13.016854   | 13.1679375  | 13.0407925  | 13.072499   |
| "Apon"     | 12.456464   | 12.254527   | 12.569026   | 12.481687   | 12.642157   | 12.325075   | 12.168693   | 12.260096   |
| "Apool"    | 7.162518    | 7.6711926   | 7.801814    | 7.774163    | 7.554083    | 7.5416784   | 8.02528     | 8.026869    |
| "App"      | 10.689295   | 9.5455215   | 10.448588   | 10.039368   | 10.155704   | 9.916121    | 10.0430995  | 9.7216945   |
| "Appbp2"   | 8.152701    | 8.271634    | 8.554001    | 8.057542    | 8.161506    | 8.171462    | 8.06925     | 8.050344    |
| "App1"     | 5.1661158   | 5.7392893   | 5.8329434   | 5.4403234   | 4.969122    | 5.320386    | 5.120396    | 5.189666    |
| "App12"    | 8.0252495   | 8.085872    | 8.4638405   | 8.769859    | 8.420642    | 8.504477    | 8.670482    | 8.5749035   |
| "Aprt"     | 9.0777055   | 9.81485275  | 9.0250245   | 9.0691345   | 9.04627     | 9.2333      | 8.2268701   | 8.41183     |
| "Aptx"     | 5.3906093   | 6.787608    | 6.421418    | 6.0138273   | 5.6258554   | 5.6200976   | 6.271193    | 6.568199    |
| "Aqp1"     | 9.116559    | 8.663637    | 8.774287    | 9.04827     | 9.365699    | 8.512719    | 9.398549    | 9.2323265   |
| "Aqp2"     | 2.4576867   | 2.4261127   | 2.3499644   | 2.412568    | 2.439627    | 2.4413502   | 2.4456851   | 2.4274735   |
| "Aqp3"     | 3.32914425  | 3.34327375  | 3.20023645  | 3.28390835  | 3.6910734   | 3.4265455   | 3.2695204   | 3.40931085  |
| "Aqp4"     | 2.57561565  | 3.51401585  | 3.89724025  | 5.28714465  | 3.3128115   | 3.46216775  | 3.13313775  | 3.2543657   |
| "Aqp5"     | 2.3251052   | 2.2876604   | 2.2464046   | 2.2718089   | 2.3186798   | 2.4343524   | 2.3109403   | 2.2943406   |
| "Aqp7"     | 3.2698762   | 3.2992117   | 3.0764496   | 3.1569145   | 3.3751502   | 3.3723047   | 3.1952083   | 3.3878038   |
| "Aqp8"     | 7.6521144   | 7.2955027   | 11.1331415  | 10.393784   | 9.077402    | 6.3546786   | 10.394905   | 9.360434    |
| "Aqp9"     | 8.93711785  | 9.08493235  | 9.1802473   | 9.2917149   | 9.36663985  | 8.62973335  | 9.4193905   | 9.40864785  |
| "Aqr"      | 4.034063225 | 4.0662564   | 3.944578675 | 3.9883937   | 4.0841959   | 4.12876365  | 4.001330475 | 4.03008645  |
| "Ar"       | 2.9316788   | 3.9356577   | 3.543515    | 3.9181807   | 3.8609483   | 2.8610263   | 3.5419018   | 3.3643324   |
| "Araf"     | 6.1099873   | 6.4532986   | 6.361213    | 6.4501805   | 5.482445    | 6.2108865   | 5.923245    | 6.2860484   |
| "Arap1"    | 3.49824     | 3.6879082   | 4.164069    | 4.1937327   | 3.6991308   | 3.4762812   | 3.8580635   | 4.0386195   |
| "Arap2"    | 7.7462907   | 7.298988    | 8.10796     | 8.135763    | 7.2812734   | 7.617675    | 8.096508    | 7.9526553   |
| "Arap3"    | 4.9335875   | 4.461069    | 4.7350302   | 4.77964035  | 4.76120855  | 4.8868218   | 4.83314965  | 4.55015275  |
| "Arcn1"    | 7.7057475   | 7.9517586   | 7.86098875  | 7.4965155   | 7.9931215   | 7.9352357   | 7.80123275  | 7.922923    |
| "Areg"     | 2.5904577   | 2.5546546   | 2.496015    | 2.5456898   | 2.5828667   | 2.5792937   | 2.5810866   | 2.5755591   |
| "Arf1"     | 10.5462965  | 10.650737   | 10.8373465  | 10.443539   | 10.8946555  | 10.4971045  | 10.4935835  | 10.5982505  |
| "Arf2"     | 4.257456533 | 3.9977103   | 3.938514867 | 3.975121233 | 4.0160628   | 3.877230467 | 4.008640067 | 4.035268667 |
| "Arf3"     | 5.96735155  | 6.03677105  | 6.20098305  | 6.20820855  | 6.0063559   | 5.9614965   | 6.150920475 | 6.255024525 |
| "Arf4"     | 7.29494735  | 7.39258245  | 7.1990025   | 6.9845343   | 7.154610425 | 7.044499375 | 6.957730225 | 6.978267825 |
| "Arf5"     | 6.0595326   | 7.120424    | 7.467261    | 7.459557    | 7.361722    | 6.7675896   | 7.630105    | 7.442731    |
| "Arf6"     | 8.6865599   | 8.014724975 | 8.332202075 | 7.976554325 | 8.24504965  | 8.22637155  | 8.203024    | 8.145424975 |
| "Arfgap1"  | 5.1569977   | 5.205032    | 4.607869    | 4.7611303   | 4.7248993   | 4.6969185   | 4.718591    | 4.7874446   |
| "Arfgap2"  | 9.25352145  | 8.86750555  | 9.321644    | 9.1511932   | 9.1578425   | 9.130151    | 9.2789585   | 9.379647    |
| "Arfgap3"  | 5.208227    | 6.532427    | 5.853043    | 5.576711    | 5.8011813   | 5.346915    | 4.1551976   | 5.311559    |
| "Arifgef1" | 8.731088    | 8.86928     | 8.48545     | 8.819778    | 8.905971    | 9.197955    | 8.763935    | 9.006692    |
| "Arifp2"   | 4.262146    | 4.12556     | 4.1603184   | 4.152633    | 4.3954315   | 4.134863    | 4.5618854   | 4.240781    |
| "Arfrp1"   | 6.360794833 | 6.383265833 | 6.190922767 | 6.3827157   | 6.383813867 | 6.843958133 | 6.256100033 | 6.3355535   |
| "Arg1"     | 14.283725   | 14.370347   | 14.38292    | 14.389665   | 14.302975   | 14.576619   | 14.04619    | 13.884867   |
| "Arg2"     | 6.16329505  | 3.2948411   | 4.3914997   | 3.43571995  | 3.5319525   | 3.176184    | 3.08928925  | 3.13232025  |
| "Arglu1"   | 8.30314165  | 7.97676575  | 7.8784685   | 7.962962    | 8.316851    | 8.44876525  | 8.0643255   | 8.21446515  |
| "Arhgap1"  | 4.45842865  | 4.44330185  | 4.4348007   | 4.5478575   | 4.5664268   | 4.4223148   | 4.3426561   | 4.47544015  |
| "Arhgap10" | 2.4612675   | 2.4517293   | 2.3738327   | 2.411334    | 2.4527476   | 2.4549336   | 2.4496393   | 2.443777    |
| "Arhgap12" | 6.44756975  | 6.241807    | 6.598929    | 6.86950685  | 6.2366038   | 7.00668     | 6.73930915  | 6.70575715  |
| "Arhgap17" | 6.8206377   | 6.9579773   | 7.8065376   | 7.5270805   | 7.3074617   | 7.2109146   | 7.508534    | 7.3785677   |

|            |             |             |             |             |             |             |             |             |
|------------|-------------|-------------|-------------|-------------|-------------|-------------|-------------|-------------|
| "Arhgap18" | 5.5179276   | 3.7224364   | 5.5121083   | 5.146045    | 4.4071674   | 4.584582    | 6.2007356   | 5.671494    |
| "Arhgap21" | 7.860865    | 8.126058    | 7.6653383   | 8.01952675  | 8.0431265   | 7.7785143   | 8.1359745   | 8.2983015   |
| "Arhgap23" | 5.1789227   | 5.1330614   | 5.0522704   | 5.2352777   | 5.309651    | 4.629223    | 5.160986    | 5.325448    |
| "Arhgap24" | 4.847477    | 3.9885855   | 5.4930468   | 4.656424    | 4.215664    | 4.571441    | 5.6557746   | 4.786651    |
| "Arhgap27" | 3.2933853   | 3.2563808   | 3.1438425   | 3.216878    | 3.35447     | 3.6040268   | 3.1876662   | 3.2671435   |
| "Arhgap29" | 3.7500033   | 3.8619125   | 3.6526728   | 3.839546    | 4.0188065   | 3.967299    | 4.3308434   | 4.3262      |
| "Arhgap39" | 3.054167    | 3.0395033   | 2.9373255   | 3.0848367   | 3.0812712   | 3.1197631   | 2.9960787   | 3.149417    |
| "Arhgap4"  | 4.575756    | 3.1694293   | 4.6810393   | 3.5410378   | 3.0539572   | 3.5130243   | 3.7334602   | 3.1379352   |
| "Arhgap5"  | 9.568736    | 9.426593667 | 8.686868333 | 8.846777333 | 9.318410667 | 9.480149    | 9.360552333 | 9.136494667 |
| "Arhgap6"  | 4.0821573   | 3.511969    | 4.4195544   | 4.4634277   | 3.887819767 | 3.867637533 | 4.770004533 | 4.6580167   |
| "Arhgap8"  | 2.3931713   | 2.3680527   | 2.3281043   | 2.4020185   | 2.3889215   | 2.3800347   | 2.3497355   | 2.3760517   |
| "Arhgap9"  | 4.75036025  | 4.19559165  | 4.785848375 | 4.2264302   | 4.0316985   | 4.443823225 | 4.30314275  | 4.124754725 |
| "Arhgdia"  | 7.2437887   | 6.675909    | 7.5067935   | 6.9659586   | 6.563526    | 5.715517    | 6.6863565   | 6.6934233   |
| "Arhgdib"  | 7.000985    | 4.9118915   | 7.2701035   | 6.135058    | 5.3381233   | 5.403682    | 5.6406665   | 5.400082    |
| "Arhgdig"  | 2.3995316   | 2.370124    | 2.3016071   | 2.3797195   | 2.397298    | 2.3879833   | 2.3933043   | 2.3897371   |
| "Arhgef1"  | 4.8053403   | 4.777178    | 4.8677516   | 4.7604733   | 4.8693085   | 4.865604    | 4.6576953   | 4.931707    |
| "Arhgef10" | 3.4627585   | 3.4147599   | 3.404162    | 3.375102    | 3.4345171   | 3.428704    | 3.4364097   | 3.4233549   |
| "Arhgef12" | 7.032837    | 6.7730288   | 6.9190713   | 7.059526667 | 7.0648822   | 7.027424    | 7.112957667 | 7.1331145   |
| "Arhgef16" | 6.192452    | 6.834248    | 7.636731    | 6.8469687   | 5.6983647   | 6.221231    | 5.655662    | 6.164513    |
| "Arhgef18" | 6.116202    | 5.9086127   | 6.4046082   | 6.459203    | 6.5469594   | 6.1036477   | 6.375087    | 6.1700945   |
| "Arhgef2"  | 3.93459975  | 3.6509378   | 4.3111769   | 3.890289    | 3.9150938   | 3.88031965  | 4.0129432   | 3.85050725  |
| "Arhgef25" | 2.64415175  | 2.7108883   | 3.17573205  | 2.86008975  | 2.799637    | 2.91246915  | 2.6673443   | 2.8838016   |
| "Arhgef3"  | 7.1240835   | 6.582237    | 6.913307    | 7.01646     | 6.9610457   | 6.3592644   | 7.7043915   | 6.93233     |
| "Arhgef40" | 2.976649867 | 3.049000533 | 2.874442233 | 3.0004417   | 3.015860067 | 3.008584467 | 2.954360533 | 3.0630221   |
| "Arhgefs"  | 6.2388716   | 7.00744     | 6.6802497   | 6.5393157   | 6.6011205   | 6.6281695   | 6.452578    | 6.59978     |
| "Arhgef7"  | 4.63238795  | 4.5986697   | 4.3911004   | 4.43404385  | 4.41739545  | 3.9488285   | 4.26032115  | 4.26708535  |
| "Arid1a"   | 5.11265615  | 5.35967435  | 5.50766     | 5.39866825  | 5.562363    | 5.31118835  | 5.2848509   | 5.220197    |
| "Arid2"    | 8.747182    | 8.895457    | 8.649144    | 8.565737    | 8.959478    | 8.999618    | 8.634273    | 8.774407    |
| "Arid3a"   | 2.190095    | 2.4943032   | 2.4654336   | 2.478462    | 2.511908    | 2.5582497   | 2.5180774   | 2.492011    |
| "Arid3b"   | 2.3798862   | 2.3585846   | 2.3407426   | 2.3257568   | 2.371685    | 2.3672473   | 2.3848302   | 2.361027    |
| "Arid4b"   | 5.54745798  | 5.12718472  | 5.37415018  | 5.2122129   | 5.4449671   | 5.07773284  | 5.38721628  | 5.26841002  |
| "Arid5a"   | 3.9027452   | 1.5808369   | 1.5695323   | 1.568126    | 1.6002148   | 1.5941103   | 1.6012988   | 1.5878785   |
| "Arid5b"   | 5.93465465  | 6.0905768   | 5.60228935  | 5.7465454   | 6.1233359   | 6.1106372   | 5.63095555  | 6.8936225   |
| "Arih1"    | 6.641428567 | 5.991552867 | 5.599925267 | 5.847020633 | 5.721234433 | 6.270049467 | 5.799357367 | 6.178974    |
| "Arih2"    | 6.899145125 | 7.22406995  | 6.219433325 | 6.42475825  | 6.9735287   | 7.11672355  | 6.476499525 | 6.8726648   |
| "Arl1"     | 10.567948   | 10.698719   | 9.88547     | 10.083161   | 10.40698    | 10.0504875  | 10.223536   | 10.170578   |
| "Arl16"    | 4.6071515   | 4.1265178   | 4.0711827   | 4.09429675  | 4.1470232   | 4.1009221   | 4.1136647   | 4.12673935  |
| "Arl2"     | 3.2111678   | 3.7502422   | 3.4883854   | 3.4338877   | 3.4694405   | 3.9013252   | 3.470481    | 3.342533    |
| "Arl2bp"   | 5.11088655  | 4.26620405  | 4.70039735  | 4.39501595  | 4.3819368   | 3.8028991   | 4.0621433   | 4.16410135  |
| "Arl3"     | 8.803711    | 8.719923    | 8.728962    | 8.831207    | 8.471391    | 8.800547    | 8.810244    | 8.534819    |
| "Arl4a"    | 6.891526    | 5.50333985  | 4.6408375   | 4.6720565   | 5.28467385  | 5.72827325  | 4.865601    | 4.68612365  |
| "Arl4c"    | 2.9635248   | 2.8896618   | 3.6323612   | 3.7004228   | 3.0338578   | 2.7261145   | 3.5883102   | 3.0334628   |
| "Arl4d"    | 6.8121088   | 5.7495564   | 5.1479858   | 5.40276615  | 5.2529354   | 5.174091    | 4.5666133   | 4.82935875  |
| "Arl5a"    | 9.09898865  | 8.58883065  | 8.487297    | 8.60335085  | 8.2782622   | 8.0726305   | 8.50937685  | 8.5962801   |
| "Arl6"     | 5.330484    | 4.580075    | 5.919182    | 4.838785    | 5.057834    | 5.0784345   | 5.8647056   | 5.0562367   |
| "Arl6ip1"  | 9.298111167 | 10.1480665  | 9.728425667 | 10.470667   | 10.11970667 | 10.263382   | 10.065597   | 10.570176   |
| "Arl6ip4"  | 8.579466    | 9.06378     | 8.804388    | 8.697615    | 9.086098    | 9.043921    | 8.561698    | 8.871794    |
| "Arl6ip5"  | 8.920237    | 8.612187    | 9.068813    | 8.737071    | 8.57927     | 8.205379    | 8.867647    | 8.419614    |
| "Arl6ip6"  | 5.14871125  | 4.7501725   | 4.49218985  | 4.76550725  | 4.6969526   | 4.7193736   | 4.8359562   | 4.90857725  |
| "Arl8a"    | 6.0207853   | 5.413935    | 5.917811    | 5.842245    | 5.0019293   | 5.7530174   | 5.7696686   | 5.660537    |
| "Arl8b"    | 8.423019167 | 7.8593318   | 8.0020567   | 7.9414426   | 8.091419467 | 8.232652667 | 8.281803833 | 7.932767333 |
| "Armc1"    | 8.4985805   | 9.054735    | 8.486746    | 8.8809765   | 9.134033    | 8.9808315   | 8.829535    | 9.0654515   |
| "Armc10"   | 6.6014915   | 6.5796175   | 6.563106    | 6.1944833   | 6.3065324   | 6.348443    | 6.045662    | 6.084762    |
| "Armc5"    | 6.0613284   | 5.516475    | 5.2294555   | 5.771941    | 5.78399     | 6.1647964   | 5.1714067   | 5.3775797   |
| "Armc6"    | 3.9775136   | 3.9749238   | 3.9064538   | 3.9602466   | 4.0162826   | 4.099201    | 3.993785    | 3.9842305   |
| "Armc7"    | 3.6616545   | 3.5174263   | 4.25635     | 3.4880502   | 3.5725007   | 3.5451412   | 3.3889625   | 3.6075132   |
| "Armcx1"   | 3.4486468   | 3.8135195   | 4.471776    | 4.241601    | 4.078291    | 4.064166    | 4.7049556   | 4.046391    |
| "Armcx2"   | 4.250196867 | 3.0118405   | 4.923436333 | 4.4385469   | 3.7230616   | 3.808799767 | 4.6355215   | 4.015694633 |
| "Armcx3"   | 6.9378255   | 6.1749977   | 7.438323    | 6.5147435   | 7.21474645  | 7.2081735   | 7.07374405  | 6.8835447   |
| "Armcx4"   | 5.737482    | 3.4037852   | 6.4741526   | 5.1098003   | 5.6199293   | 5.4530954   | 5.1547613   | 5.0616727   |
| "Armcx5"   | 3.0426562   | 2.9874182   | 2.8311102   | 2.9316924   | 3.0557182   | 2.9897006   | 3.1182423   | 3.046113    |
| "Arntl"    | 9.025087    | 5.574314    | 5.9516954   | 3.4989355   | 4.927146    | 6.5923343   | 5.9170856   | 3.5486143   |
| "Arpc1a"   | 8.403006    | 8.4605055   | 8.772709    | 8.768299    | 8.8118      | 8.588101    | 8.721792    | 8.64543     |
| "Arpc1b"   | 6.9758483   | 5.67734735  | 6.68999175  | 6.1868978   | 5.9681346   | 5.798688    | 5.9044271   | 5.95830465  |
| "Arpc2"    | 12.366119   | 12.194185   | 12.635392   | 12.459724   | 12.273457   | 12.227347   | 12.324224   | 12.393621   |
| "Arpc3"    | 11.032346   | 10.512369   | 11.055738   | 10.956543   | 10.643908   | 10.567898   | 10.707788   | 10.648327   |
| "Arpc4"    | 7.07923935  | 6.78311635  | 7.2830904   | 6.97110885  | 6.69653865  | 6.65301865  | 6.8499828   | 6.78311575  |
| "Arpc5"    | 11.19659    | 10.721466   | 11.373763   | 11.044201   | 10.813474   | 10.655428   | 11.003531   | 10.6599655  |
| "Arpc5l"   | 8.696234    | 8.77283565  | 8.81002085  | 9.0595225   | 8.891455    | 8.8189898   | 8.8436475   | 8.917041    |
| "Arpp19"   | 6.4536119   | 6.6064719   | 7.7036314   | 7.6223876   | 6.574659267 | 6.356160667 | 7.1902985   | 6.638026867 |
| "Arpp21"   | 2.7566376   | 2.72878435  | 2.67453065  | 2.70588485  | 2.7476904   | 2.75486625  | 2.7443216   | 2.7394038   |
| "Arr3"     | 2.4672902   | 2.4394488   | 2.359933    | 2.394547    | 2.4642344   | 2.4612017   | 2.4544482   | 2.454179    |
| "Arrb1"    | 4.629334    | 4.032249    | 3.9677944   | 4.371229    | 4.2380676   | 4.0629807   | 5.00148     | 3.52515     |
| "Arrb2"    | 6.75034615  | 5.43135595  | 6.5267379   | 6.16396165  | 5.97568795  | 5.8503843   | 6.1779595   | 5.75141765  |
| "Arrdc1"   | 3.1002905   | 3.06335975  | 3.25189325  | 3.1742655   | 3.07415185  | 3.0695993   | 2.93559025  | 3.06166055  |
| "Arrdc4"   | 9.36266     | 6.7228018   | 6.8548007   | 7.234312    | 6.92329885  | 6.61219045  | 6.45988985  | 6.56621715  |
| "Arssa"    | 7.3439803   | 8.88105     | 8.701789    | 9.400503    | 8.71512     | 9.552779    | 9.162907    | 9.865329    |
| "Arsg"     | 5.8097847   | 7.865309    | 5.9667405   | 6.36434125  | 6.6684656   | 7.3449011   | 5.73491715  | 5.71500265  |
| "Art1"     | 2.222507    | 2.1997774   | 2.4943054   | 2.1930788   | 2.2205906   | 2.33616     | 2.2275329   | 2.2095065   |
| "Art2a-ps" | 2.422022    | 2.402278    | 2.323229    | 2.3518636   | 2.4072862   | 2.3980212   | 2.4021401   | 2.3921773   |
| "Art2b"    | 2.5551682   | 2.5151443   | 2.4821227   | 2.5059931   | 2.5464125   | 2.5432653   | 2.5483687   | 2.5440364   |

|           |             |             |             |             |             |             |             |             |
|-----------|-------------|-------------|-------------|-------------|-------------|-------------|-------------|-------------|
| "Art3"    | 4.541109    | 3.8159783   | 4.189627    | 4.2749915   | 3.8685894   | 4.286883    | 4.894244    | 4.3052783   |
| "Art4"    | 2.5874338   | 2.5516322   | 2.4750798   | 2.5218453   | 2.8222213   | 2.5639148   | 2.543954    | 2.5601106   |
| "Art5"    | 2.5534945   | 2.5221188   | 2.4603205   | 2.4758668   | 2.5586076   | 2.8553052   | 2.5366797   | 2.5527864   |
| "Arvcf"   | 4.0799017   | 4.32700465  | 3.5272572   | 4.152095    | 4.3918594   | 3.8060067   | 4.294838    | 3.98066675  |
| "Arx"     | 2.4097972   | 2.3796382   | 2.303898    | 2.3631551   | 2.3951683   | 2.3952484   | 2.394248    | 2.399915    |
| "Arxes1"  | 2.555583    | 2.546782    | 2.4530764   | 2.4915228   | 2.5463104   | 2.5433393   | 2.535737    | 2.540073    |
| "As3mt"   | 9.850188    | 10.108266   | 9.19278     | 9.414719    | 9.72344     | 10.444433   | 8.98302     | 8.457107    |
| "Asah1"   | 11.057549   | 10.420587   | 11.381559   | 10.982437   | 10.435234   | 10.169782   | 10.528563   | 10.596802   |
| "Asah2"   | 4.73006115  | 4.84181935  | 5.1481036   | 5.04104685  | 5.0919881   | 4.70630365  | 5.1180279   | 5.2548403   |
| "Asap1"   | 3.69149355  | 3.8433117   | 3.69926765  | 3.64947915  | 3.5368296   | 3.44782515  | 4.148757    | 3.47401145  |
| "Asb10"   | 2.4170234   | 2.3840802   | 2.3378215   | 2.3604984   | 2.4080033   | 2.4016652   | 2.4067094   | 2.3920145   |
| "Asb13"   | 5.776718267 | 5.4377265   | 5.857970267 | 5.694272933 | 5.787567533 | 5.770135567 | 6.517841133 | 6.2090586   |
| "Asb14"   | 2.6827543   | 2.6565866   | 2.5521545   | 2.5975244   | 2.688174    | 2.686906    | 2.657676    | 2.6881206   |
| "Asb15"   | 2.472299    | 2.4456766   | 2.3784533   | 2.4184277   | 2.4647353   | 2.4567294   | 2.4603393   | 2.4517918   |
| "Asb18"   | 2.5769153   | 2.5489097   | 2.5103707   | 2.5356479   | 2.5776443   | 2.5634642   | 2.5614362   | 2.5748844   |
| "Asb3"    | 5.7372746   | 6.0458765   | 6.090647    | 6.0073647   | 5.89657     | 6.330519    | 6.362295    | 5.8759365   |
| "Asb4"    | 2.92936005  | 2.8601116   | 2.7918705   | 2.78398125  | 2.7837672   | 2.848778    | 3.0497236   | 2.75646765  |
| "Asb5"    | 2.6183891   | 2.5929816   | 2.5220008   | 2.5528314   | 2.6208153   | 2.617095    | 2.5974665   | 2.615057    |
| "Asb6"    | 5.67483115  | 5.58381535  | 5.5480658   | 5.69214725  | 6.14676715  | 5.68183945  | 5.64244385  | 5.8409285   |
| "Asb8"    | 6.08170035  | 6.08864905  | 5.8775718   | 5.79827485  | 6.02632975  | 5.8666428   | 6.1264115   | 6.20511795  |
| "Ascc1"   | 4.8033595   | 4.9003854   | 4.0737247   | 4.458873    | 4.066831    | 4.271903    | 4.2870655   | 4.18297     |
| "Ascc2"   | 4.91929875  | 4.9334483   | 5.1521522   | 4.97612585  | 4.9262995   | 5.04809615  | 4.9923689   | 5.03348775  |
| "Ascl2"   | 2.946426    | 2.9426527   | 2.8549542   | 2.8983889   | 2.991356    | 2.9795613   | 2.9130137   | 2.9940062   |
| "Ascl3"   | 2.7512882   | 2.7150314   | 2.6664567   | 2.6922345   | 2.7349994   | 2.7638242   | 2.71079     | 2.7613027   |
| "Asfla"   | 5.96354765  | 6.3656815   | 5.7272965   | 5.9010515   | 6.0088545   | 5.91938735  | 5.7399665   | 5.968078    |
| "Asgr1"   | 11.843427   | 12.926266   | 12.3187275  | 12.577749   | 12.956089   | 12.640567   | 12.31502    | 12.725764   |
| "Asgr2"   | 6.8010464   | 7.374019    | 7.2745457   | 7.4274745   | 6.832637    | 6.5434494   | 7.355412    | 7.4053183   |
| "Ash1l"   | 7.845172133 | 7.831768533 | 7.806180333 | 7.958268    | 8.086935    | 8.293681233 | 7.780429367 | 8.000604233 |
| "Ash2l"   | 4.9632342   | 5.2039988   | 4.7904996   | 5.0617343   | 4.96715115  | 5.0749414   | 4.96032135  | 5.0686495   |
| "Asl"     | 13.055109   | 13.145353   | 11.993513   | 12.516069   | 12.999498   | 13.232187   | 11.875164   | 12.143133   |
| "Asna1"   | 5.436205    | 5.6384454   | 5.5597563   | 5.9446163   | 5.954108    | 5.8382897   | 5.698182    | 5.8557005   |
| "Asns"    | 5.33140015  | 7.25099445  | 6.18761275  | 5.68696955  | 2.84835975  | 8.7030795   | 2.7026687   | 3.5370975   |
| "Asnsd1"  | 9.645933    | 10.174358   | 9.461961    | 9.670742    | 10.027098   | 9.897876    | 9.75351     | 9.79444     |
| "Aspa"    | 6.5506563   | 7.1560345   | 7.2601986   | 8.111794    | 7.4344115   | 7.7045827   | 7.809101    | 7.706224    |
| "Aspdh"   | 8.407721    | 9.0671425   | 8.59008     | 8.616352    | 9.179765    | 9.307531    | 8.695942    | 8.974297    |
| "Asph"    | 5.7149908   | 5.74465885  | 6.090187875 | 6.234284975 | 6.050950975 | 5.68579855  | 5.96555485  | 6.21465035  |
| "Aspn"    | 2.95302625  | 2.9800475   | 2.81028715  | 2.86539615  | 3.06776     | 3.06050495  | 2.8876984   | 3.0170727   |
| "Aspscr1" | 5.4808607   | 5.9964542   | 5.9441447   | 6.5228777   | 6.09601     | 6.0195875   | 5.9101396   | 6.009858    |
| "Asrgl1"  | 5.594261667 | 6.0716264   | 5.9755241   | 6.146164233 | 6.113420667 | 5.878813967 | 5.955852633 | 5.3706711   |
| "Ass1"    | 12.74037    | 12.746262   | 12.047443   | 12.612379   | 12.418221   | 12.993743   | 12.844168   | 12.907963   |
| "Aste1"   | 4.6951814   | 4.243875    | 4.1261034   | 4.2141705   | 4.31165     | 4.2999477   | 4.2443295   | 4.310337    |
| "Astrn2"  | 2.658609    | 2.6386783   | 2.5787756   | 2.5666203   | 2.6768072   | 2.6525142   | 2.657578    | 2.648245    |
| "Asxl1"   | 6.3399772   | 6.02555415  | 5.974621    | 5.9396999   | 5.7139115   | 5.87140085  | 5.9571091   | 5.8429575   |
| "Asz1"    | 2.472263    | 2.4430685   | 2.3746707   | 2.426767    | 2.4658034   | 2.4617105   | 2.4618835   | 2.4532537   |
| "Atad1"   | 5.9163149   | 6.1766084   | 6.03882235  | 6.27754735  | 5.954978    | 6.16865965  | 6.15798265  | 6.16212105  |
| "Atad2b"  | 9.100477    | 8.986416    | 8.6487875   | 8.882985    | 9.035542    | 9.492065    | 9.00953     | 9.023345    |
| "Atad3a"  | 9.648223125 | 9.816038    | 9.49305575  | 9.31938725  | 9.696544    | 9.593323    | 9.169415    | 9.2226955   |
| "Atcay"   | 2.5605311   | 2.52761245  | 2.4715809   | 2.5044941   | 2.66248915  | 2.583652    | 2.52814495  | 2.53172695  |
| "Ate1"    | 3.1365789   | 3.1037101   | 2.9801413   | 2.9754757   | 2.89039495  | 3.334894    | 3.0245547   | 3.0370915   |
| "Atfl1"   | 9.45222     | 9.188388    | 9.116474    | 8.958385    | 9.016856    | 9.068314    | 9.249003    | 9.060548    |
| "Atf2"    | 6.898791425 | 6.89548465  | 7.0220508   | 6.9374455   | 6.9529918   | 7.00412765  | 6.997007125 | 7.049855425 |
| "Atf3"    | 7.5392723   | 3.082301    | 3.7697802   | 3.1014767   | 3.149732    | 3.9950879   | 3.2319038   | 3.1775749   |
| "Atf4"    | 7.538693    | 6.744444867 | 6.4915281   | 6.2689316   | 6.4809289   | 6.819343    | 6.447991667 | 6.698809833 |
| "Atf5"    | 9.279318    | 9.959034    | 9.186116    | 8.941582    | 10.202998   | 11.492571   | 9.643229    | 9.247155    |
| "Atf6"    | 9.048917    | 8.780669    | 8.169923    | 8.55099     | 9.199767    | 9.333019    | 8.350086    | 8.9676485   |
| "Atf6b"   | 4.4149375   | 3.725521    | 4.0644245   | 4.0777936   | 4.106192    | 4.0772185   | 4.3240643   | 4.0093555   |
| "Atf7ip"  | 4.4701786   | 5.4933615   | 5.056211    | 5.3140244   | 5.5520782   | 6.0954847   | 5.2381606   | 5.0116987   |
| "Atf7ip2" | 2.5727334   | 2.5380359   | 2.4652355   | 2.511707    | 2.5659711   | 2.5634284   | 2.5630116   | 2.5628567   |
| "Atg10"   | 4.3770533   | 3.6068008   | 3.8737662   | 4.622513    | 4.4040966   | 4.000215    | 5.068754    | 4.780501    |
| "Atg12"   | 5.712884767 | 5.741471133 | 5.169683    | 5.372449333 | 5.532851    | 5.348323233 | 5.287030933 | 5.291419433 |
| "Atg13"   | 6.803586    | 6.9202957   | 6.428178    | 6.6081367   | 7.2990384   | 6.791277    | 6.5597844   | 6.5804133   |
| "Atg14"   | 7.3899536   | 6.469716    | 6.8039823   | 7.1226964   | 6.992055    | 7.160748    | 6.6727543   | 7.8772063   |
| "Atg16l1" | 8.251803    | 8.286892    | 7.456168    | 7.74856     | 8.205212    | 8.2726755   | 7.7944527   | 7.9783688   |
| "Atg2a"   | 6.464734    | 5.9936795   | 5.131791    | 5.2494774   | 5.249084    | 5.2460055   | 5.16241     | 5.0401607   |
| "Atg2b"   | 6.1273394   | 5.999879    | 5.8874063   | 5.823812    | 5.990481    | 6.170107    | 5.8623457   | 6.0771585   |
| "Atg3"    | 7.243348    | 7.2608159   | 7.13194085  | 7.3684476   | 7.2421035   | 7.20873885  | 7.2856204   | 7.3175668   |
| "Atg4b"   | 6.3580322   | 6.257408    | 6.3301962   | 6.49865745  | 6.33859465  | 6.25423375  | 6.36686565  | 6.3535368   |
| "Atg4d"   | 6.4952006   | 6.4901304   | 6.2698426   | 6.4297867   | 6.2095356   | 6.931044    | 6.16608     | 6.704562    |
| "Atg5"    | 8.008855    | 8.43023     | 8.2744128   | 8.595566    | 8.554454067 | 8.077336767 | 8.362534    | 8.071490433 |
| "Atg7"    | 3.6050165   | 3.5702608   | 3.8317354   | 5.0026026   | 6.2827053   | 6.91043     | 7.1994214   | 7.601574    |
| "Atg9b"   | 2.8159134   | 2.7867413   | 2.6928732   | 2.734833    | 2.8191295   | 2.8258739   | 2.7958477   | 2.824169    |
| "Athl1"   | 5.176626    | 5.5060363   | 5.5974145   | 5.8171396   | 5.8724737   | 6.2582383   | 5.9873776   | 5.634924    |
| "Atl2"    | 10.210016   | 10.5360315  | 8.9538185   | 9.0533925   | 9.979       | 10.8303205  | 8.87974625  | 9.0775765   |
| "Atl3"    | 3.749972967 | 3.9155696   | 3.899745333 | 3.8409372   | 3.7075383   | 3.9182079   | 3.740332033 | 4.073246833 |
| "Atm"     | 5.541098    | 6.092973    | 6.335574    | 6.5466394   | 5.7251472   | 6.1617036   | 6.162387    | 6.617602    |
| "Atmin"   | 3.6235762   | 3.5272667   | 4.079816    | 3.7148857   | 3.5925744   | 3.8928483   | 4.0696316   | 3.5936315   |
| "Atoh8"   | 5.957793    | 2.8298445   | 2.2352467   | 2.8979337   | 2.8522103   | 3.5338964   | 3.646942    | 2.8199875   |
| "Atox1"   | 7.3544465   | 7.748210433 | 7.599707467 | 7.622752067 | 7.622678667 | 7.532416667 | 7.504996667 | 7.404588833 |
| "Atp10a"  | 3.5093348   | 3.5763376   | 3.3063936   | 3.4581606   | 3.5992463   | 3.5978458   | 3.494719    | 3.6456056   |
| "Atp11a"  | 5.463581    | 3.78404     | 6.030522    | 5.32819135  | 4.1374005   | 4.5043184   | 4.54561485  | 4.6853125   |
| "Atp11b"  | 9.138435    | 8.591313    | 8.274395    | 8.634271    | 8.210107    | 8.972864    | 8.633838    | 8.673827    |

|            |             |             |             |             |             |             |             |             |
|------------|-------------|-------------|-------------|-------------|-------------|-------------|-------------|-------------|
| "Atp11c"   | 5.7643785   | 6.0810404   | 5.549719    | 6.0625014   | 6.9590006   | 6.380542    | 6.242063    | 7.7337875   |
| "Atp12a"   | 2.5010645   | 2.472645    | 2.3923874   | 2.4265997   | 2.5169656   | 2.5032887   | 2.476156    | 2.4908059   |
| "Atp13a1"  | 7.767426    | 8.020956    | 7.4566855   | 7.5837765   | 8.044389    | 8.357235    | 7.511774    | 7.798257    |
| "Atp13a2"  | 6.84597685  | 5.386956    | 7.0496347   | 6.3181765   | 6.16706775  | 6.255367    | 6.3702335   | 6.077959    |
| "Atp13a3"  | 8.3561792   | 8.936689    | 8.4209358   | 8.4064555   | 8.736774    | 8.8189695   | 8.65622775  | 8.8072992   |
| "Atp1a1"   | 11.2353945  | 11.927144   | 11.740413   | 12.296435   | 12.200501   | 11.90492325 | 11.64041675 | 11.8919935  |
| "Atp1a2"   | 2.5246482   | 2.4879413   | 2.4419763   | 2.474496    | 2.5100713   | 2.5027325   | 2.493674    | 2.4951813   |
| "Atp1b1"   | 9.73078392  | 8.5736958   | 7.92111718  | 7.54097894  | 8.14734492  | 8.62645272  | 7.67510894  | 7.83584486  |
| "Atp1b2"   | 2.4372709   | 2.4076197   | 2.3148644   | 2.3776777   | 2.4251819   | 2.4443944   | 2.4206734   | 2.4186406   |
| "Atp1b3"   | 11.046508   | 9.736226    | 10.433929   | 10.06402    | 9.9437685   | 9.747519    | 9.943429    | 9.512887    |
| "Atp1b4"   | 2.5291605   | 2.502357    | 2.4552965   | 2.4385142   | 2.5302525   | 2.531401    | 2.5249565   | 2.5383058   |
| "Atp2a2"   | 8.831794825 | 8.41420955  | 7.75832135  | 7.37849725  | 8.96223505  | 8.3285441   | 7.5369171   | 7.5748541   |
| "Atp2a3"   | 2.6542318   | 2.542771    | 2.6256382   | 2.3997915   | 2.5642521   | 2.4193563   | 2.558256    | 2.6828177   |
| "Atp2b2"   | 2.630487933 | 2.617813533 | 3.044971233 | 2.5751699   | 3.415485133 | 2.6299008   | 2.800721667 | 2.6243096   |
| "Atp2c1"   | 7.7898528   | 7.49983625  | 7.76008815  | 7.7185767   | 7.7173035   | 7.62023535  | 7.9025527   | 7.80089495  |
| "Atp5a1"   | 10.34492087 | 10.77563667 | 10.5048516  | 10.68663667 | 10.731831   | 10.59726633 | 10.70251133 | 10.90291587 |
| "Atp5b"    | 12.6697235  | 12.99548    | 12.805264   | 12.942862   | 13.076069   | 13.11377    | 13.131721   | 13.243879   |
| "Atp5c1"   | 8.0750547   | 9.20656665  | 8.6578992   | 8.978212    | 9.12467865  | 9.0384465   | 9.04864     | 9.144147    |
| "Atp5d"    | 11.211814   | 11.7762885  | 11.366641   | 11.4630705  | 11.648987   | 11.603067   | 11.458793   | 11.5474065  |
| "Atp5e"    | 11.841101   | 12.177827   | 11.977735   | 12.081111   | 11.935098   | 11.744516   | 12.147551   | 12.15844    |
| "Atp5f1"   | 12.488785   | 12.745918   | 12.5928205  | 12.70860625 | 12.81620325 | 12.7802375  | 13.0310995  | 12.893168   |
| "Atp5g1"   | 11.1528225  | 11.369071   | 11.784766   | 11.531067   | 11.4579735  | 11.28868    | 11.854527   | 11.645925   |
| "Atp5g2"   | 6.9882068   | 7.1508907   | 6.96414385  | 6.9479455   | 6.9636903   | 6.9926717   | 6.87636     | 6.9836477   |
| "Atp5g3"   | 13.406617   | 13.881635   | 13.785404   | 13.87046    | 13.990237   | 13.988612   | 14.03879    | 14.125879   |
| "Atp5h"    | 12.6719     | 12.979034   | 12.7636335  | 12.816311   | 12.826927   | 12.730006   | 13.0667245  | 12.9511335  |
| "Atp5j"    | 12.07593    | 12.253059   | 12.3453045  | 12.457824   | 12.42446    | 12.1405115  | 12.65237    | 12.650988   |
| "Atp5j2"   | 12.27293    | 12.622834   | 12.5840065  | 12.7838955  | 12.646258   | 12.478219   | 12.8441365  | 12.8093785  |
| "Atp5k"    | 10.67881433 | 11.282369   | 11.30813767 | 11.53282633 | 11.3888635  | 11.236702   | 11.63633533 | 11.75288933 |
| "Atp5l"    | 11.866902   | 12.184256   | 12.003745   | 12.018571   | 11.988843   | 11.963619   | 12.14726    | 12.084824   |
| "Atp5o"    | 10.46221825 | 10.727085   | 10.391779   | 10.5470545  | 10.615448   | 10.421181   | 11.0148185  | 10.8862675  |
| "Atp5s"    | 6.1307607   | 6.614703    | 7.016866    | 6.4955597   | 6.209144    | 6.218708    | 6.429518    | 6.239585    |
| "Atp5sl"   | 6.5762525   | 6.5436144   | 6.45253     | 6.58331     | 6.5624876   | 6.332182    | 6.5665092   | 6.9339285   |
| "Atp6ap1"  | 9.853973    | 9.267909    | 9.741177    | 9.537845    | 9.24314     | 9.611332    | 9.552057    | 9.571096    |
| "Atp6ap2"  | 11.105002   | 10.72259    | 10.880525   | 10.612108   | 10.857078   | 11.23095533 | 10.63231883 | 10.53564417 |
| "Atp6v0a1" | 4.430511    | 5.320846    | 5.713336    | 5.3156023   | 4.6006994   | 4.930766    | 4.9603605   | 4.942585    |
| "Atp6v0a2" | 4.686254267 | 4.868548133 | 4.438290867 | 4.6776435   | 4.769026667 | 4.561921667 | 4.484111067 | 4.713871067 |
| "Atp6v0a4" | 2.6617718   | 1.9386352   | 1.8762007   | 1.8963687   | 1.9312644   | 1.9259968   | 1.9357401   | 1.9179285   |
| "Atp6v0b"  | 5.620953633 | 5.500005    | 5.6343641   | 5.6341225   | 5.538440867 | 6.093619833 | 5.506017467 | 5.6853417   |
| "Atp6v0c"  | 10.83889233 | 10.776503   | 10.73013683 | 10.73114233 | 10.869421   | 10.91277767 | 10.697935   | 10.74507667 |
| "Atp6v0d1" | 10.42636    | 10.66607    | 10.42656    | 10.402775   | 10.411568   | 10.423563   | 10.322054   | 10.34383    |
| "Atp6v0e"  | 10.108061   | 10.17091    | 10.044028   | 10.05993    | 9.422008    | 9.768182    | 9.500179    | 9.570097    |
| "Atp6v0e2" | 2.4184704   | 2.3763456   | 2.3446445   | 2.537009    | 2.3994393   | 2.3939586   | 2.4140348   | 2.3840241   |
| "Atp6v1a"  | 8.6860545   | 8.5170655   | 9.2155075   | 9.044784    | 8.72971375  | 8.528692    | 9.041225    | 8.931316    |
| "Atp6v1b2" | 6.8661765   | 6.4059173   | 6.81784335  | 6.69089035  | 6.50715735  | 6.6606374   | 6.87328695  | 6.3331782   |
| "Atp6v1c1" | 8.562777833 | 8.786458667 | 8.354282    | 8.417149167 | 8.536105333 | 8.9062028   | 8.435797533 | 8.675336833 |
| "Atp6v1d"  | 9.784238333 | 9.612648333 | 9.416201    | 9.330787    | 9.5486895   | 9.9462      | 9.46702     | 9.420743667 |
| "Atp6v1e1" | 5.359526967 | 5.174898533 | 5.1756968   | 5.199859733 | 5.321729467 | 5.340972267 | 5.2268661   | 5.214402833 |
| "Atp6v1e2" | 2.9568658   | 2.9516368   | 2.8049402   | 2.9194632   | 2.979229    | 2.9746823   | 2.9160013   | 3.0162244   |
| "Atp6v1f"  | 10.578964   | 10.506996   | 10.544991   | 10.39517    | 10.163393   | 10.408436   | 10.399544   | 10.391951   |
| "Atp6v1g1" | 8.312541033 | 8.276865767 | 8.342615667 | 8.075487333 | 8.088011167 | 8.296279167 | 8.152290433 | 8.2407462   |
| "Atp6v1g2" | 2.4478438   | 2.4091454   | 2.3862925   | 2.392098    | 2.4250455   | 2.423164    | 2.432998    | 2.4189105   |
| "Atp6v1h"  | 9.287031    | 9.411284    | 9.324941    | 9.315865    | 9.338687    | 9.364793    | 9.223372    | 9.408319    |
| "Atp7a"    | 6.0600631   | 5.5867447   | 6.2053482   | 5.98940575  | 5.80321085  | 5.9167522   | 6.1354948   | 5.4255005   |
| "Atp7b"    | 2.4134252   | 2.373233    | 2.3617313   | 2.3433232   | 2.3991582   | 2.3913121   | 2.3846412   | 2.3889356   |
| "Atp8a1"   | 4.65409565  | 3.79317235  | 5.04352975  | 4.67879965  | 3.7474809   | 4.00289115  | 4.601642    | 4.25391775  |
| "Atp8b2"   | 2.4713058   | 2.4302351   | 2.4132614   | 2.413727    | 2.4540358   | 2.4492364   | 2.4469948   | 2.4413185   |
| "Atp8b3"   | 3.2290702   | 3.1986573   | 3.056705    | 3.1725922   | 3.2481074   | 3.415973    | 3.107639    | 3.3400478   |
| "Atp9a"    | 5.59147045  | 7.0417056   | 6.6408265   | 6.2349105   | 6.33891065  | 6.35130365  | 6.34671965  | 6.28636535  |
| "Atp9b"    | 5.412262    | 5.4243827   | 5.4387126   | 5.456898    | 5.1748815   | 5.1877055   | 5.5290203   | 5.4809613   |
| "Atpaf2"   | 5.6466813   | 5.7423105   | 5.838592    | 5.8525815   | 6.0358067   | 5.9643984   | 5.8941336   | 5.8727846   |
| "Atpbd4"   | 4.303971    | 4.3228426   | 4.7156796   | 4.1680804   | 4.544926    | 4.2898293   | 4.9952726   | 4.393852    |
| "Atpif1"   | 6.3456953   | 6.02567515  | 6.4626327   | 6.2131603   | 6.05287415  | 5.8334658   | 6.359775    | 6.2660382   |
| "Atr"      | 5.664802    | 6.9355793   | 5.8303947   | 6.414578    | 7.03383     | 6.552138    | 6.4431195   | 6.700491    |
| "Atrip"    | 5.927596    | 4.9280515   | 6.1063156   | 5.812218    | 4.086821    | 4.403328    | 5.2614903   | 4.6225047   |
| "Atrx"     | 5.2346758   | 4.93621394  | 5.21617192  | 5.21843704  | 5.20911842  | 5.13904484  | 5.22750306  | 5.19775108  |
| "Atxn10"   | 7.505635875 | 8.316215675 | 7.745813625 | 7.940238925 | 7.862509575 | 8.031326    | 7.99559665  | 7.9803922   |
| "Atxn2"    | 7.724758867 | 8.567508667 | 8.165197    | 8.617057833 | 8.596240667 | 9.086100533 | 8.773022667 | 8.733346867 |
| "Atxn7"    | 5.1582108   | 3.6432498   | 4.033849    | 4.047042    | 4.4825935   | 4.194452    | 4.085807    | 3.933073    |
| "Atxn7l1"  | 3.971741    | 2.4578075   | 3.9647646   | 2.5900126   | 2.4953785   | 2.6616306   | 3.493737    | 2.3502347   |
| "Atxn7l3"  | 6.9201927   | 6.674822    | 6.405286    | 6.6774054   | 6.922554    | 7.080422    | 6.296145    | 6.5499406   |
| "Atxn7l3b" | 10.13180125 | 9.890169    | 10.39859638 | 10.03264963 | 10.2422245  | 10.10706925 | 10.15004275 | 10.05954413 |
| "AU020206" | 5.8024616   | 5.269885    | 7.6392484   | 7.031356    | 6.6287537   | 5.944008    | 6.912675    | 6.948951    |
| "AU040096" | 3.1877346   | 3.1836903   | 3.019066    | 3.1187677   | 3.2173076   | 3.2200618   | 3.1430078   | 3.2691364   |
| "AU040320" | 4.37589935  | 4.3883015   | 4.3876498   | 4.4123865   | 4.1106533   | 4.65005425  | 4.6559007   | 4.3866495   |
| "Auh"      | 4.9684896   | 5.0564377   | 4.815864167 | 5.0858237   | 5.1267466   | 4.955066333 | 5.0740115   | 5.050144233 |
| "Aup1"     | 9.005088    | 9.425781    | 8.844056    | 9.178692    | 9.225035    | 9.273832    | 8.945979    | 9.180159    |
| "Aurkaip1" | 9.539649    | 10.205032   | 9.988612    | 10.120965   | 9.897216    | 9.854306    | 10.086705   | 10.053323   |
| "Aurkb"    | 3.1468363   | 3.1137795   | 3.0386581   | 3.0634482   | 3.163239    | 3.164068    | 3.1007288   | 3.1681468   |
| "Aut52"    | 2.48126875  | 2.83550285  | 2.44778395  | 2.386729    | 2.4629896   | 2.46171035  | 2.46404955  | 2.47069375  |
| "AV320801" | 3.0617845   | 3.034041    | 2.9546266   | 2.9980273   | 3.2113967   | 3.084641    | 3.0011292   | 3.0905704   |
| "Avl9"     | 7.326416    | 6.7326064   | 6.3765244   | 6.8442283   | 6.597013    | 6.931822    | 7.2297077   | 7.107413    |

|                 |             |             |             |             |             |             |             |             |
|-----------------|-------------|-------------|-------------|-------------|-------------|-------------|-------------|-------------|
| "Avp"           | 2.4275239   | 2.392824    | 2.3137362   | 2.3814054   | 2.4139266   | 2.4299085   | 2.4112895   | 2.4030645   |
| "Avpi1"         | 8.771936    | 9.430519    | 9.963999    | 8.844011    | 8.629171    | 9.026581    | 8.640213    | 8.990673    |
| "Avpr1a"        | 9.16799475  | 7.4251761   | 7.6911895   | 6.29622875  | 5.9512832   | 7.32138945  | 7.5542472   | 6.5990775   |
| "AW112010"      | 11.940761   | 11.203926   | 12.829987   | 12.835553   | 11.1323805  | 10.21003    | 11.977825   | 11.790089   |
| "AW121686"      | 2.5986886   | 2.5686817   | 2.5260878   | 2.5504634   | 2.5904455   | 2.5886993   | 2.5882778   | 2.580574    |
| "AW209491"      | 8.128707    | 8.532043    | 8.330091    | 7.915805    | 8.892077    | 8.712086    | 8.111574    | 8.439217    |
| "AW549877"      | 8.385728    | 8.497644    | 8.41851     | 8.544793    | 7.774963    | 8.486195    | 8.351825    | 8.388975    |
| "Axin1"         | 4.7993669   | 4.63283455  | 4.51726905  | 4.4746139   | 4.5470907   | 4.60652     | 4.3689345   | 4.601705    |
| "Axin2"         | 3.0723453   | 4.191897    | 3.6470006   | 3.6720622   | 4.4007807   | 3.6616933   | 4.4400167   | 3.9072185   |
| "Axl"           | 4.581445    | 3.21469215  | 4.9763262   | 4.718772    | 4.1069536   | 3.75686345  | 4.4765065   | 4.05118895  |
| "AY036118"      | 8.003354    | 8.080568    | 7.8932495   | 8.001566    | 8.002422    | 7.9574294   | 7.8759346   | 7.8908525   |
| "Aym1"          | 2.5154877   | 2.4945054   | 2.436647    | 2.4778943   | 2.518548    | 2.5045717   | 2.491428    | 2.4989257   |
| "Azgp1"         | 13.777489   | 14.052138   | 13.993592   | 14.137416   | 14.244507   | 14.237979   | 13.937947   | 14.128736   |
| "Azi1"          | 2.9333322   | 2.927375    | 3.1922667   | 3.002021    | 3.0225656   | 3.3631597   | 2.8819723   | 2.9875836   |
| "Azi2"          | 7.467533    | 7.4467361   | 7.493339    | 7.53728635  | 7.5215637   | 7.57403225  | 7.5388992   | 7.5489145   |
| "Azin1"         | 8.6540255   | 8.5745393   | 9.089357    | 9.47542125  | 8.9263865   | 8.583181    | 9.1800285   | 9.155896    |
| "B130024G19Rik" | 3.6234934   | 3.720428    | 3.3019533   | 3.1191077   | 4.328075    | 3.8276215   | 3.4590654   | 4.046691    |
| "B230118H07Rik" | 7.4476805   | 8.034821    | 8.1771      | 8.303003    | 7.9609656   | 7.6485853   | 8.265804    | 8.077246    |
| "B230120H23Rik" | 4.0692456   | 4.15400375  | 4.0908251   | 4.5672535   | 3.9763719   | 4.40274335  | 4.39454925  | 4.3893436   |
| "B230219D22Rik" | 9.27088     | 9.674834    | 9.379498    | 9.651045    | 9.630932    | 10.06972    | 9.673258    | 9.882109    |
| "B230308N11Rik" | 7.90275875  | 7.4938743   | 7.57100865  | 7.75560825  | 7.6607925   | 8.08189815  | 7.9478905   | 7.7902092   |
| "B230312A22Rik" | 6.1169133   | 5.289194    | 4.994006    | 5.2035103   | 5.0328355   | 4.7908034   | 4.440239    | 5.027675    |
| "B230354K17Rik" | 5.8848345   | 6.35518485  | 6.5058063   | 6.57320885  | 6.92074815  | 7.045663    | 6.5924935   | 6.6425375   |
| "B230354O11Rik" | 2.4664335   | 2.4397588   | 2.3865166   | 2.4111056   | 2.4708514   | 2.4771552   | 2.4485402   | 2.4792888   |
| "B2m"           | 14.256796   | 14.2333585  | 14.158701   | 14.392998   | 14.2358055  | 14.2435255  | 14.278254   | 14.3064955  |
| "B3galnt1"      | 5.2413754   | 5.0940924   | 5.856298    | 5.1472344   | 5.448319    | 5.3993173   | 5.013565    | 4.22109     |
| "B3galnt2"      | 6.764337    | 6.52326345  | 6.82510945  | 6.5630735   | 6.514785    | 7.19116485  | 7.35151645  | 6.87157295  |
| "B3galnt1"      | 3.8946773   | 4.2551216   | 3.7935375   | 3.7216363   | 3.4773529   | 3.739938    | 3.5634782   | 3.74228395  |
| "B3galt2"       | 3.34345985  | 3.3944955   | 3.1577758   | 3.2506558   | 3.46244525  | 3.48772515  | 3.2482626   | 3.53231735  |
| "B3galt4"       | 2.3833313   | 2.5100513   | 2.3286142   | 2.325706    | 2.3694882   | 2.3729348   | 2.3825066   | 2.3619425   |
| "B3galt6"       | 2.87331825  | 3.2029635   | 2.76287665  | 2.75969635  | 2.8519787   | 3.20992785  | 2.82056425  | 2.8240037   |
| "B3gat1"        | 2.6143334   | 2.5874183   | 2.5059341   | 2.5569245   | 2.61581005  | 2.6096499   | 2.5932479   | 2.5982821   |
| "B3gat3"        | 4.24578405  | 4.42485385  | 4.3008686   | 4.2824373   | 4.43607495  | 4.65105995  | 4.4410081   | 4.46628     |
| "B3gnt1"        | 6.5124965   | 6.67607     | 6.7930107   | 7.2282095   | 6.675638    | 6.644535    | 6.912284    | 6.630678    |
| "B3gnt2"        | 6.261931    | 6.31818735  | 6.23360285  | 6.51126725  | 6.2653415   | 6.459622    | 6.24413675  | 6.7794882   |
| "B3gnt5"        | 2.814255    | 2.7954328   | 2.670203    | 2.6723022   | 2.8448722   | 2.836263    | 2.7882514   | 2.8654206   |
| "B3gnt9-ps"     | 2.4181983   | 2.3998377   | 2.39496     | 2.372863    | 2.4373295   | 2.4467993   | 2.4251468   | 2.4117038   |
| "B4galnt1"      | 6.5220623   | 6.6572814   | 6.845849    | 6.3410025   | 6.669202    | 6.5313835   | 6.313319    | 6.26166     |
| "B4galt1"       | 7.6896553   | 7.855408    | 8.207244    | 7.5819726   | 7.77717     | 7.3524723   | 7.3545084   | 7.7544746   |
| "B4galt3"       | 6.070393    | 5.1800675   | 5.0578485   | 5.1333685   | 5.1520147   | 5.344768    | 4.576249    | 4.618976    |
| "B4galt4"       | 2.723688    | 2.6767132   | 3.7359333   | 2.665118    | 2.7212284   | 2.7119277   | 3.0195467   | 2.7083619   |
| "B4galt6"       | 5.444283225 | 3.1355756   | 4.53189295  | 3.98792295  | 3.6514408   | 3.233779325 | 3.81780975  | 3.299816325 |
| "B4galt7"       | 5.6034632   | 4.86925995  | 4.8189365   | 4.744774    | 5.15711715  | 5.2539273   | 4.63174615  | 4.9433551   |
| "B930003M22Rik" | 2.8616617   | 2.8389282   | 2.739212    | 2.790626    | 3.0614545   | 3.0826838   | 2.8437922   | 3.0014243   |
| "B930041F14Rik" | 3.8059616   | 3.886063    | 3.7627318   | 3.7778747   | 3.8101366   | 3.8098657   | 3.8154252   | 3.996241    |
| "B9d1"          | 2.2188988   | 2.1882858   | 2.6344068   | 2.1668081   | 2.2075167   | 2.1729345   | 2.2077484   | 2.1930265   |
| "B9d2"          | 3.1337042   | 2.247016    | 3.19068     | 2.28166     | 2.3126988   | 2.3081422   | 2.319195    | 2.3010006   |
| "Baat"          | 8.872682    | 9.4542733   | 9.278977    | 9.5288835   | 9.4097523   | 9.0293188   | 9.5417728   | 9.41641665  |
| "Baat1"         | 3.436967233 | 3.7541422   | 3.535667233 | 4.025823767 | 3.738404867 | 3.843745467 | 3.736170033 | 3.742616767 |
| "Bace1"         | 6.0944988   | 6.824078    | 6.352582    | 6.56512     | 7.26012765  | 7.7236235   | 7.0379575   | 6.9082665   |
| "Bace2"         | 3.4382741   | 3.428796733 | 4.103526533 | 3.667904667 | 3.6141194   | 3.4734776   | 3.808145133 | 3.472437667 |
| "Bach1"         | 8.7816925   | 8.4357875   | 8.337794    | 8.728334    | 8.14718715  | 8.3619803   | 7.7232168   | 8.6792135   |
| "Bach2"         | 6.783543    | 4.8660626   | 5.381432    | 5.658454    | 4.7544394   | 5.8654194   | 6.5227566   | 6.374184    |
| "Bad"           | 6.9212871   | 7.0504045   | 7.03556815  | 7.052431    | 7.2966675   | 6.9781182   | 6.98187575  | 7.0324925   |
| "Bag1"          | 10.523225   | 10.730742   | 10.491889   | 10.53522    | 10.60563    | 10.282853   | 10.47461    | 10.441781   |
| "Bag2"          | 3.3830013   | 2.522775    | 2.5399125   | 2.2330813   | 2.3950946   | 2.452143    | 2.458758    | 2.442236    |
| "Bag3"          | 7.7655435   | 8.042245    | 7.9438977   | 7.492702    | 8.558378    | 8.056599    | 7.660921    | 7.546948    |
| "Bag4"          | 6.77401805  | 6.84339825  | 6.2864912   | 6.4845393   | 6.3696555   | 6.6353842   | 6.30047885  | 6.467041    |
| "Bag5"          | 8.0484      | 7.620122    | 6.8794456   | 6.9438124   | 7.0322714   | 7.0175424   | 6.6767306   | 6.7529244   |
| "Bag6"          | 7.183855    | 6.9485846   | 6.9685087   | 6.7066107   | 7.058979    | 6.7788525   | 6.799447    | 6.6283503   |
| "Bai1"          | 3.02075     | 2.9876626   | 2.9026034   | 2.971109    | 3.0070715   | 3.0087712   | 2.98504     | 2.9918962   |
| "Baiap2"        | 3.68497105  | 3.24608515  | 2.85542055  | 2.83175585  | 3.16661285  | 3.1319304   | 2.967957    | 2.825087125 |
| "Baiap2l1"      | 9.54418     | 10.5791315  | 8.273821    | 8.57141     | 8.9615035   | 10.366575   | 8.713967    | 7.8823035   |
| "Bak1"          | 3.7140186   | 3.5632472   | 4.850444    | 4.0191526   | 4.011452    | 3.331015    | 3.744319    | 3.6327107   |
| "Bambi"         | 7.1508093   | 5.9161577   | 5.952222    | 5.497221    | 6.3389125   | 6.212409    | 5.9520545   | 5.9600496   |
| "Banf1"         | 8.258616333 | 8.17371     | 8.322661667 | 8.279709333 | 8.046505333 | 8.181850333 | 8.318908667 | 8.239639    |
| "Banp"          | 4.899136    | 5.5698237   | 4.976438    | 4.513527    | 5.0001154   | 5.1753473   | 4.8361325   | 4.5262785   |
| "Bap1"          | 6.9212028   | 6.64194485  | 6.1899295   | 6.7090203   | 6.73330185  | 6.7462103   | 6.765815    | 6.85597185  |
| "Barhl1"        | 2.4579686   | 2.4413683   | 2.35986625  | 2.40272085  | 2.4727622   | 2.4675574   | 2.45066015  | 2.58590645  |
| "Basp1"         | 6.6195793   | 3.694838    | 6.887663    | 6.4773083   | 4.724259    | 4.074707    | 5.5833797   | 5.175664    |
| "Batf"          | 2.765819    | 2.738411    | 3.3534384   | 2.8820872   | 2.7594109   | 2.7539983   | 2.6197176   | 2.749456    |
| "Batf2"         | 2.539874    | 2.5507464   | 2.501705    | 2.5031898   | 2.5222213   | 2.533622    | 2.4823704   | 2.5505788   |
| "Batf3"         | 4.532897    | 3.8289814   | 6.476725    | 5.5134254   | 5.1468606   | 4.142155    | 5.90585     | 5.3022256   |
| "Bax"           | 7.4337425   | 7.257549    | 6.800333    | 6.939329    | 6.9748263   | 7.742757    | 6.263709    | 6.987233    |
| "Baz1b"         | 4.558246    | 4.6655784   | 4.792006333 | 4.972493367 | 4.938663033 | 4.923663567 | 4.7867201   | 5.013055467 |
| "Baz2a"         | 5.315163867 | 5.165406967 | 5.657863767 | 5.4668759   | 5.283165933 | 5.369403667 | 5.1465703   | 5.320211167 |
| "Baz2b"         | 7.7266493   | 7.3590875   | 7.048465    | 7.1465063   | 7.055979    | 7.3371367   | 7.3771887   | 7.424857    |
| "BB283400"      | 2.3115387   | 2.271954    | 2.2296903   | 2.229367    | 2.6011329   | 2.2883523   | 2.2867906   | 2.2819698   |
| "BB287469"      | 2.5689712   | 2.612878    | 2.446466    | 2.4898114   | 2.6428418   | 2.5439012   | 2.5332887   | 2.5236392   |
| "Bbc3"          | 6.802981    | 5.382366    | 4.883772    | 4.4773498   | 4.266695    | 4.627515    | 4.5081224   | 4.388825    |
| "Bbip1"         | 9.416183    | 10.431079   | 10.69078    | 10.382332   | 10.080577   | 10.03345    | 10.605655   | 10.363649   |

|            |             |             |             |             |             |             |             |             |
|------------|-------------|-------------|-------------|-------------|-------------|-------------|-------------|-------------|
| "Bbox1"    | 9.808593    | 11.322889   | 10.759943   | 11.1472225  | 11.550027   | 10.94982    | 11.252596   | 11.537565   |
| "Bbs2"     | 3.7267148   | 3.9127784   | 3.2383232   | 3.1633272   | 3.2662406   | 3.2676587   | 3.125298    | 3.2596095   |
| "Bbs9"     | 4.7108045   | 2.9837244   | 3.08802     | 3.2329948   | 3.944429    | 2.9917476   | 2.9273758   | 3.1361837   |
| "Bbx"      | 3.458248133 | 3.486969567 | 3.680347767 | 3.543223867 | 3.563616333 | 3.4816367   | 3.522652033 | 3.523263533 |
| "BC001981" | 2.4541123   | 2.4204125   | 2.3823166   | 2.3517175   | 2.4481132   | 2.4292479   | 2.4125822   | 2.4235868   |
| "BC002059" | 4.812569    | 4.7571487   | 4.7794886   | 4.92575     | 4.8214087   | 4.777355    | 4.853161    | 4.8858194   |
| "BC002163" | 10.828254   | 11.179933   | 11.332642   | 11.340155   | 11.415727   | 10.959087   | 11.579438   | 11.442518   |
| "BC002189" | 2.7529688   | 2.7367792   | 2.6166544   | 2.6661563   | 2.7704601   | 2.8106818   | 2.707273    | 2.7659397   |
| "BC002230" | 6.3398576   | 6.3067055   | 5.99619     | 6.5085797   | 6.18275     | 6.0152555   | 6.1761627   | 5.937691    |
| "BC003266" | 6.6303034   | 7.051475    | 6.586925    | 6.66836     | 6.694501    | 6.7815056   | 6.699629    | 6.489237    |
| "BC003331" | 8.15346715  | 8.15778765  | 8.424955    | 8.313537    | 8.24691675  | 8.22208585  | 8.2050608   | 8.245284    |
| "BC003965" | 6.1951725   | 6.5289201   | 6.5588949   | 6.76394665  | 6.615751    | 6.53294835  | 6.4668766   | 6.479801    |
| "BC004004" | 6.517458775 | 7.5515306   | 7.60303515  | 7.497344825 | 7.387990075 | 7.626846325 | 7.892509375 | 7.63035795  |
| "BC005512" | 5.2631271   | 2.5010872   | 4.5771408   | 5.3387005   | 5.8270542   | 7.08733165  | 5.8511512   | 4.0405742   |
| "BC005357" | 9.28523875  | 9.0733886   | 8.88300785  | 8.915394    | 9.059504    | 8.973513    | 8.91408075  | 8.9350225   |
| "BC005561" | 2.5519676   | 2.6720777   | 2.6584215   | 2.740806    | 2.6022015   | 2.9504452   | 2.5638647   | 2.9351153   |
| "BC005624" | 4.7368587   | 4.45333335  | 4.53676165  | 4.6594999   | 4.3292057   | 4.51968785  | 4.56002875  | 4.577832    |
| "BC005685" | 3.156371    | 3.164956    | 3.0624785   | 3.091284    | 3.1482067   | 3.199691    | 3.0251105   | 3.1417692   |
| "BC006779" | 10.275337   | 9.295451    | 10.049947   | 9.545365    | 9.426234    | 9.609494    | 9.753294    | 9.630975    |
| "BC006965" | 2.4125962   | 2.3907528   | 2.318949    | 2.3681426   | 2.413448    | 2.4036837   | 2.413658    | 2.4376802   |
| "BC013529" | 9.63074925  | 10.077706   | 9.68179775  | 9.985583    | 10.103695   | 9.8149775   | 9.5265225   | 9.5493005   |
| "BC013712" | 6.483697    | 4.6482544   | 7.1255774   | 6.58464     | 5.8833966   | 5.5367503   | 6.7741647   | 6.0311294   |
| "BC016423" | 7.4117494   | 7.5369396   | 7.300911    | 7.322131    | 7.266409    | 7.5472245   | 7.456043    | 7.4520683   |
| "BC016548" | 2.9028387   | 2.8673809   | 2.754415    | 2.8050623   | 2.9111338   | 2.913537    | 2.886207    | 2.909843    |
| "BC016579" | 2.5381355   | 2.4346488   | 2.3683064   | 2.3942766   | 2.4634717   | 2.4605553   | 2.4555235   | 2.4587278   |
| "BC017158" | 5.1260414   | 6.006857    | 5.8133006   | 6.0269732   | 5.8108616   | 5.7455764   | 5.8953514   | 5.8819036   |
| "BC017612" | 4.2104893   | 5.3924456   | 5.548673    | 5.387326    | 4.579633    | 4.6304893   | 5.0907793   | 4.3714366   |
| "BC017643" | 5.5262246   | 5.229369    | 6.62996     | 6.085454    | 6.0591736   | 5.93906     | 5.8381042   | 5.4254317   |
| "BC017647" | 5.1763844   | 5.099967    | 5.1128917   | 5.1288395   | 5.350725    | 5.160555    | 5.16618     | 5.1253986   |
| "BC018242" | 2.544147    | 2.5720234   | 2.4684649   | 2.5107517   | 2.5606823   | 2.5584471   | 2.5609717   | 2.5462186   |
| "BC018473" | 2.4517318   | 2.42396155  | 2.36570655  | 2.37645605  | 2.44373855  | 2.4454733   | 2.43525875  | 2.43861695  |
| "BC018507" | 7.19829815  | 6.9752095   | 6.8683465   | 6.68041     | 7.0701905   | 7.1106397   | 7.03001215  | 6.60921165  |
| "BC020535" | 3.559917    | 3.5323734   | 3.1795237   | 3.5462613   | 3.5521765   | 3.545569    | 3.5502713   | 3.5398793   |
| "BC021614" | 4.5731654   | 5.1243978   | 6.822186    | 6.0479345   | 5.42084     | 4.2066784   | 6.505833    | 6.2173824   |
| "BC022687" | 3.0399742   | 2.8230999   | 2.7339349   | 2.776728    | 2.8508673   | 2.8479524   | 2.8354566   | 2.8436158   |
| "BC022960" | 2.4809172   | 2.4544878   | 2.3684165   | 2.4125886   | 2.4787655   | 2.4835835   | 2.4593222   | 2.467562    |
| "BC023105" | 2.681279    | 1.8678154   | 4.607281    | 3.848805    | 1.8977734   | 1.8944693   | 4.6255633   | 2.6829798   |
| "BC023829" | 8.637928    | 8.300089    | 9.453326    | 9.055439    | 8.737128    | 8.368024    | 9.018198    | 8.932466    |
| "BC024137" | 6.179703    | 7.7277503   | 6.260413    | 7.7963367   | 6.75423     | 7.5446544   | 6.8698688   | 7.5972137   |
| "BC024139" | 4.0145884   | 4.854395    | 4.451345    | 4.837509    | 4.839898    | 4.924089    | 4.908632    | 4.894004    |
| "BC024479" | 4.6697807   | 4.860796    | 5.520666    | 5.1419296   | 5.465069    | 5.362834    | 5.550932    | 5.492777    |
| "BC025446" | 9.217398    | 10.014262   | 9.569724    | 9.654592    | 9.730116    | 9.737518    | 9.320259    | 9.368518    |
| "BC025933" | 2.7541113   | 2.938875    | 2.6995463   | 2.8155215   | 2.861244    | 3.1872137   | 2.7507885   | 2.904605    |
| "BC026585" | 3.7612736   | 4.2865105   | 5.0874486   | 5.891589    | 4.859306    | 3.5703406   | 5.279106    | 5.2984586   |
| "BC027231" | 7.0366054   | 6.5583353   | 4.93612     | 5.1957517   | 5.203244    | 6.6780524   | 5.1630445   | 5.953005    |
| "BC028528" | 6.511983    | 4.8858323   | 6.10345     | 5.931382    | 4.7979083   | 4.799835    | 5.388306    | 4.8206506   |
| "BC028777" | 2.8593385   | 2.844285    | 2.7565413   | 2.8264067   | 2.8586192   | 2.8959506   | 2.8360045   | 2.8851597   |
| "BC029722" | 5.5354676   | 5.9367185   | 6.0375323   | 5.7978363   | 5.866105    | 5.6047597   | 5.5643005   | 5.5012627   |
| "BC031181" | 10.02023    | 10.032573   | 10.512934   | 10.468      | 10.0968895  | 9.791569    | 10.305187   | 10.109535   |
| "BC037034" | 3.6532059   | 3.6160872   | 3.6812801   | 3.7221665   | 3.6327581   | 3.9845343   | 3.6388535   | 3.6884449   |
| "BC046331" | 4.0427823   | 3.3197858   | 3.2201998   | 3.669296    | 3.36418     | 4.272576    | 3.6337204   | 3.6373415   |
| "BC048355" | 4.413795    | 4.4281416   | 4.9053245   | 5.4307218   | 5.2933035   | 5.051154    | 6.010268    | 5.57672     |
| "BC048403" | 4.8684173   | 4.5796447   | 3.5280263   | 3.4912708   | 3.3194575   | 3.692701    | 4.2500544   | 3.4387357   |
| "BC051019" | 3.0554361   | 3.038909    | 2.9076443   | 2.9767363   | 3.156108    | 3.094908    | 3.0275092   | 3.215312    |
| "BC053393" | 2.4073768   | 2.4017057   | 2.310821    | 2.3488078   | 2.4103186   | 2.405654    | 2.397931    | 2.465981    |
| "BC056474" | 4.6692185   | 5.3832765   | 5.5053654   | 5.8250494   | 5.2851987   | 4.8585677   | 5.465718    | 5.628564    |
| "BC089491" | 2.3462682   | 2.3249314   | 2.2555542   | 2.3128414   | 2.3488994   | 2.3399854   | 2.3526495   | 2.532041    |
| "BC089597" | 11.67972    | 11.160158   | 11.978008   | 11.893792   | 12.041403   | 11.117849   | 12.444165   | 11.896019   |
| "BC090627" | 2.2112136   | 2.149024    | 2.0689354   | 2.144165    | 2.289043    | 2.4614258   | 2.1416037   | 2.1529474   |
| "BC094435" | 11.363548   | 10.3917185  | 11.160171   | 10.96214    | 11.05858375 | 11.412293   | 11.0322465  | 10.9538245  |
| "BC096441" | 6.4869585   | 5.4471418   | 6.21301335  | 5.9806715   | 5.5007801   | 5.63151     | 5.36892385  | 5.962567    |
| "BC100451" | 2.553537    | 2.4065132   | 2.3298743   | 2.2569497   | 2.6037407   | 2.427306    | 2.3650498   | 2.3400557   |
| "BC147527" | 3.778738    | 3.8643394   | 3.5506454   | 3.7207642   | 4.042176    | 4.0794454   | 3.634977    | 4.1197267   |
| "Bcap29"   | 7.5554814   | 8.652376    | 8.608191    | 8.361946    | 8.402552    | 8.186182    | 8.387636    | 7.9939485   |
| "Bcap31"   | 10.3232595  | 10.5241735  | 10.6338475  | 10.8828935  | 10.998126   | 10.824238   | 11.041958   | 10.9284865  |
| "Bcar1"    | 6.1891695   | 6.07823445  | 6.726218    | 7.5194734   | 6.8665987   | 6.4051733   | 7.57177685  | 7.9429325   |
| "Bcar3"    | 6.806056    | 8.1581      | 8.221328    | 8.138876    | 7.9408236   | 7.945175    | 8.622884    | 8.161932    |
| "Bcas2"    | 5.247600833 | 5.137241867 | 4.898843367 | 4.8664787   | 4.895988933 | 5.200145433 | 5.4384161   | 5.012876933 |
| "Bcas3"    | 5.0091105   | 5.4743395   | 4.8418427   | 5.5620384   | 5.494857    | 5.2749357   | 4.869013    | 5.169367    |
| "Bcat2"    | 2.5458949   | 2.513105    | 2.476451    | 2.4767246   | 2.533166    | 2.522861    | 2.5378528   | 2.5169063   |
| "Bccip"    | 10.100036   | 10.795876   | 10.476137   | 10.551922   | 10.751446   | 10.669537   | 10.642954   | 10.596443   |
| "Bcdin3d"  | 2.4148831   | 2.38721     | 2.441927    | 2.4280982   | 2.4981413   | 3.3480015   | 2.9441214   | 2.449687    |
| "Bche"     | 4.53532225  | 4.2327809   | 4.5163674   | 4.85093545  | 4.5939596   | 4.0188751   | 4.5458123   | 4.57638585  |
| "Bckdha"   | 8.92929     | 9.612039    | 8.953788    | 9.495845    | 9.569967    | 9.508678    | 9.216769    | 9.471543    |
| "Bckdhh"   | 11.301489   | 11.195195   | 11.308471   | 11.338178   | 11.346086   | 11.022846   | 11.115936   | 11.210249   |
| "Bckdk"    | 3.7355165   | 4.9425254   | 5.0432243   | 4.9972053   | 4.906038    | 4.7946486   | 4.9096456   | 4.890636    |
| "Bcl10"    | 7.978979533 | 6.739812467 | 7.305214433 | 7.406141067 | 6.4936479   | 6.8632762   | 6.756577333 | 6.478385733 |
| "Bcl11a"   | 2.8157114   | 2.791487    | 2.6730625   | 2.75728795  | 2.8189687   | 2.80657975  | 2.79927635  | 2.8200717   |
| "Bcl2a1a"  | 4.597620833 | 3.177864833 | 4.271378133 | 3.340158067 | 3.288276267 | 3.333701033 | 3.634139067 | 3.1556141   |
| "Bcl21i"   | 7.1250005   | 5.7539306   | 5.4534063   | 5.710352    | 5.3224263   | 5.758617    | 5.729824    | 5.6701922   |
| "Bcl2110"  | 2.4073565   | 2.3733      | 2.3118157   | 2.4299376   | 2.4035218   | 2.3955953   | 2.3970034   | 2.3919768   |

|           |             |             |             |             |             |             |             |             |
|-----------|-------------|-------------|-------------|-------------|-------------|-------------|-------------|-------------|
| "Bcl2l11" | 6.70058918  | 4.8583019   | 3.93932232  | 4.03113642  | 4.09467856  | 4.19025872  | 3.76795346  | 3.88903516  |
| "Bcl2l13" | 6.4112506   | 6.487484    | 6.7114267   | 6.281794    | 7.0494847   | 6.5282717   | 6.894658    | 6.8101616   |
| "Bcl2l14" | 2.5878868   | 2.5562887   | 2.50866245  | 2.5422416   | 2.5931319   | 2.5649991   | 2.575063    | 2.57458255  |
| "Bcl2l2"  | 4.1082336   | 4.37555167  | 4.086420933 | 4.1865948   | 4.148933367 | 4.340361    | 4.0591666   | 4.275108267 |
| "Bcl3"    | 8.095934    | 7.226355    | 7.8421655   | 8.590333    | 7.138099    | 7.1306787   | 7.023233    | 7.4526396   |
| "Bcl6"    | 4.55914425  | 4.4941526   | 5.84953455  | 4.5520455   | 4.246969    | 4.31316115  | 6.28128145  | 5.0273742   |
| "Bcl6b"   | 3.1713445   | 3.1464684   | 3.7127426   | 3.106619    | 3.163772    | 3.038289    | 3.425546    | 3.032363    |
| "Bcl7b"   | 6.316837    | 5.935427    | 5.7035503   | 5.717577    | 5.5116754   | 6.201518    | 5.187223    | 5.731389    |
| "Bcl7c"   | 7.0511575   | 7.2697797   | 6.957794    | 6.7518935   | 6.8847136   | 7.1387854   | 7.538478    | 7.0292034   |
| "Bcl9"    | 2.7709131   | 2.7323632   | 2.6988335   | 2.718586    | 2.7541356   | 2.760605    | 2.7581458   | 2.7413192   |
| "Bcl9l"   | 5.800973    | 6.6591735   | 6.6133485   | 6.4766      | 6.8552365   | 6.520368    | 6.393231    | 6.528348    |
| "Bclaf1"  | 7.929981    | 7.9441665   | 7.57782515  | 7.68570065  | 7.9972325   | 7.898446    | 7.92701935  | 7.5132233   |
| "Bcmo1"   | 6.3338275   | 5.952918    | 6.9883466   | 6.582041    | 6.6856055   | 6.034094    | 6.580746    | 6.3351173   |
| "Bco2"    | 5.2519464   | 5.264952    | 7.223944    | 7.3942122   | 6.052106    | 5.9807663   | 7.386873    | 6.8714576   |
| "Bcr"     | 5.0679952   | 4.63396945  | 5.04403125  | 5.14367345  | 4.63327095  | 5.0446126   | 4.88237655  | 5.09317065  |
| "Bcs1l"   | 6.4381714   | 6.4737687   | 7.1710067   | 6.7732167   | 6.7195663   | 6.7356415   | 6.932523    | 6.983323    |
| "Bdh1"    | 5.36724365  | 8.2086385   | 8.186706    | 8.65522085  | 8.8995305   | 8.2057      | 9.4629298   | 8.8741035   |
| "Bdnf"    | 2.2160976   | 2.220455    | 2.1254942   | 2.7933717   | 2.200148    | 2.1908417   | 2.2023542   | 2.2599208   |
| "Becn1"   | 6.496560125 | 6.32597545  | 6.1578517   | 6.3285836   | 6.349277375 | 6.258586725 | 6.336258075 | 6.37553525  |
| "Bet1"    | 7.40123275  | 7.8229645   | 7.7585374   | 7.69906825  | 8.2111903   | 7.7984838   | 7.69411995  | 7.51781345  |
| "Bet1l"   | 7.28834045  | 7.175617625 | 6.636913525 | 6.84214525  | 7.46628995  | 6.92581725  | 6.52805305  | 6.692192875 |
| "Beta-s"  | 13.635817   | 13.463467   | 12.624984   | 13.835225   | 13.90789    | 13.726667   | 13.371349   | 12.488907   |
| "Bex1"    | 2.626183    | 2.592591    | 2.5031066   | 2.575263    | 2.6116915   | 2.6024175   | 2.5798926   | 2.5992196   |
| "Bex2"    | 2.7000585   | 2.704685    | 2.6034527   | 2.6378977   | 2.7223613   | 2.6902375   | 2.6467772   | 2.779482    |
| "Bex4"    | 2.9497986   | 2.91847     | 2.9052184   | 2.9134858   | 2.9874368   | 2.9405181   | 3.826024    | 2.942913    |
| "Bex6"    | 2.7460487   | 2.722516    | 2.6443577   | 2.6563876   | 2.7610168   | 2.7408957   | 2.7284098   | 2.7575817   |
| "Bfar"    | 8.535783533 | 9.248703    | 8.707363833 | 9.156237667 | 9.392151667 | 9.135128    | 8.6862938   | 8.949208433 |
| "Bglaip"  | 2.8104556   | 2.814258    | 2.7557206   | 2.711835    | 2.8030329   | 2.7937186   | 2.7876587   | 2.796848    |
| "Bgn"     | 9.732142333 | 9.025924    | 9.751664667 | 9.280727333 | 9.568118667 | 9.347973667 | 9.574265833 | 9.053943667 |
| "Bhlhe22" | 2.8152692   | 2.8164804   | 2.6887684   | 2.7675312   | 2.8481703   | 2.8518724   | 2.804144    | 2.855738    |
| "Bhlhe40" | 11.0993805  | 9.063408    | 8.835778    | 9.492472    | 9.454792    | 8.911496    | 9.581867    | 10.055628   |
| "Bhmt"    | 13.759644   | 15.483388   | 15.234627   | 15.567998   | 15.4025     | 15.401777   | 15.503355   | 15.437383   |
| "Bhmt2"   | 10.86985125 | 11.7039965  | 12.0931925  | 11.987471   | 11.7969045  | 11.580392   | 12.10503625 | 11.5737725  |
| "Bicc1"   | 5.5043163   | 5.136378    | 5.431643    | 5.2844114   | 5.3055096   | 4.9379745   | 5.2782755   | 5.2916555   |
| "Bicd1"   | 2.6771005   | 2.652712667 | 2.5886325   | 2.608462333 | 2.730070767 | 2.674972433 | 2.656902633 | 2.689419433 |
| "Bicd2"   | 4.5625999   | 4.2661398   | 4.4824348   | 4.5245975   | 4.438944567 | 4.462554633 | 4.820333433 | 4.457949867 |
| "Bid"     | 4.6146754   | 4.4976919   | 4.8463067   | 4.88308465  | 4.21129765  | 4.4875075   | 4.403231    | 4.63400225  |
| "Bik"     | 3.098259367 | 3.1771749   | 2.758020733 | 3.0708894   | 2.901159533 | 3.244701533 | 2.887724433 | 3.631376567 |
| "Bin1"    | 3.717816    | 3.4212918   | 3.833376    | 3.6131763   | 3.670426    | 3.4403863   | 3.6459644   | 3.6283329   |
| "Bin3"    | 8.659847    | 8.441536    | 8.609333    | 8.130575    | 7.84287     | 8.351568    | 7.924658    | 7.688018    |
| "Birc2"   | 8.606264    | 7.9714503   | 8.438166    | 8.4833145   | 8.413881    | 8.142326    | 8.100097    | 8.059319    |
| "Birc3"   | 6.043363    | 5.1886105   | 5.83498285  | 5.83252295  | 5.40054985  | 5.28432685  | 5.34824205  | 5.4216708   |
| "Birc5"   | 2.932449    | 2.954244    | 3.0097754   | 2.9407716   | 2.9730327   | 2.9646685   | 2.9685702   | 2.9589205   |
| "Birc6"   | 5.7314987   | 5.7234981   | 5.571913    | 5.766945167 | 5.908089667 | 5.855012967 | 6.173710667 | 6.108336967 |
| "Blcap"   | 8.080452    | 8.669678    | 8.048757    | 7.8212867   | 7.942305    | 8.226091    | 7.8021407   | 7.566792    |
| "Blm"     | 4.6062307   | 2.9477592   | 2.4263325   | 2.4428015   | 2.2611964   | 2.466826    | 2.4054897   | 2.4635544   |
| "Blmh"    | 7.661891    | 7.8590858   | 7.86381165  | 7.685436    | 7.5036435   | 7.6616797   | 7.4240293   | 7.55452975  |
| "Blnk"    | 2.5819802   | 2.5608966   | 2.8781095   | 2.9987135   | 2.4099903   | 2.5683756   | 2.7430515   | 2.5672362   |
| "Bloc1s1" | 9.771088    | 10.054509   | 10.489113   | 10.391568   | 9.972626    | 9.561373    | 10.108726   | 10.184495   |
| "Bloc1s3" | 3.7556674   | 3.7318208   | 3.7220335   | 3.6706903   | 3.7290113   | 3.6611187   | 3.7501454   | 3.8084319   |
| "Blvra"   | 8.126179    | 7.4324284   | 8.791661    | 8.407657    | 7.757221    | 7.7303863   | 8.06459     | 8.035564    |
| "Blvrb"   | 11.188618   | 11.090016   | 12.265703   | 10.898948   | 10.826396   | 10.079929   | 10.558909   | 10.334595   |
| "Blzf1"   | 4.9382055   | 4.56406205  | 4.40733665  | 4.17088175  | 4.4914015   | 4.708755    | 4.21422075  | 4.12483935  |
| "Bmi1"    | 8.24447725  | 8.658465    | 8.46989625  | 8.3465718   | 8.33965875  | 8.995655    | 8.7313975   | 8.4450765   |
| "Bmp1"    | 5.4846971   | 6.21406175  | 5.78141065  | 5.76345575  | 6.49684715  | 5.99518175  | 5.8243055   | 5.5120668   |
| "Bmp2"    | 8.695607    | 8.110707    | 7.6062207   | 7.490758    | 7.9964724   | 8.024598    | 8.713144    | 7.926867    |
| "Bmp2k"   | 5.09726345  | 4.9225154   | 4.4026391   | 4.310454    | 4.38850475  | 4.26886525  | 4.3794396   | 3.95752545  |
| "Bmp4"    | 5.2106247   | 4.266928    | 5.0443807   | 4.341981    | 3.9260592   | 3.797268    | 3.6655033   | 4.2508044   |
| "Bmp5"    | 3.3049229   | 2.75189685  | 3.4788788   | 2.73734285  | 3.2223862   | 3.25695455  | 3.19813225  | 3.01271975  |
| "Bmp6"    | 3.8191044   | 3.4457798   | 3.5717542   | 3.4063694   | 3.2262115   | 3.6777935   | 3.8622997   | 3.446644    |
| "Bmp7"    | 2.0551827   | 2.356457    | 1.9779882   | 2.0307896   | 2.0661523   | 2.0317285   | 2.5306082   | 2.8812346   |
| "Bmp8a"   | 2.965622    | 3.0365586   | 2.7546122   | 2.842709    | 2.9649692   | 2.9596772   | 2.9531996   | 2.9517746   |
| "Bmp8b"   | 2.4170156   | 2.3889368   | 2.3169265   | 2.3583124   | 2.4127498   | 2.4120042   | 2.4062412   | 2.4112666   |
| "Bmpr1a"  | 5.505702    | 6.243852425 | 6.0043035   | 6.142250425 | 5.9198837   | 6.016188425 | 6.0376403   | 6.06561435  |
| "Bmpr1b"  | 2.816144    | 2.7895837   | 2.680811    | 2.7180042   | 2.876728    | 2.8268995   | 2.9024134   | 2.8276582   |
| "Bmpr2"   | 3.3794456   | 3.3937664   | 3.7892509   | 3.8769233   | 4.2921433   | 4.0336733   | 3.6556695   | 3.4383652   |
| "Bms1"    | 7.1876082   | 7.035592    | 7.1210766   | 6.9135065   | 7.1862903   | 7.2589383   | 6.97592     | 6.978326    |
| "Bmx"     | 2.9477615   | 2.9449174   | 2.8226163   | 2.8572483   | 2.9423494   | 2.9592776   | 2.929506    | 2.9975896   |
| "Bmyc"    | 2.4353404   | 4.8880424   | 2.7244627   | 2.9529204   | 2.9869084   | 3.0600452   | 3.2163827   | 3.024585    |
| "Bnc1"    | 2.798088    | 2.7397525   | 2.7354295   | 2.748164    | 2.8217437   | 2.772499    | 2.7901392   | 2.76899     |
| "Bnip1"   | 6.247067    | 6.2139497   | 7.1961064   | 6.8213353   | 6.357746    | 6.209113    | 6.748414    | 6.5172377   |
| "Bnip2"   | 7.147437675 | 6.73184765  | 7.32268125  | 7.224427425 | 7.0525067   | 6.8858552   | 7.0694215   | 7.046283075 |
| "Bnip3"   | 13.058395   | 13.421637   | 12.148435   | 12.686691   | 13.207815   | 13.316091   | 12.191299   | 12.486005   |
| "Bnip3l"  | 10.40013667 | 10.60132    | 9.548320467 | 9.98041     | 10.18490767 | 10.25170017 | 9.720338    | 9.985477333 |
| "Boc"     | 2.867741    | 2.85651665  | 2.7782917   | 2.8116406   | 2.8992359   | 2.88215115  | 2.82814885  | 2.86119345  |
| "Bod1l"   | 6.3986993   | 6.0973225   | 6.509391    | 6.663038    | 6.048922    | 6.6220064   | 6.606558    | 6.6112056   |
| "Bok"     | 7.1688786   | 6.1164417   | 6.3502383   | 6.0917625   | 5.231016    | 5.9599714   | 5.97813     | 5.990098    |
| "Bola1"   | 4.4910188   | 4.9137008   | 4.5448339   | 4.47928515  | 4.5907151   | 4.81359085  | 4.55943085  | 4.31490825  |
| "Bola2"   | 7.7489565   | 8.137598425 | 7.81730195  | 7.63922175  | 7.78228925  | 7.86360875  | 7.57665285  | 7.7198899   |
| "Bop1"    | 5.105867    | 5.7643933   | 5.474379    | 4.8732886   | 6.245355    | 5.992871    | 5.224906    | 5.4379773   |
| "Bpgm"    | 7.196542333 | 7.306049333 | 6.787053767 | 7.3892059   | 7.647312533 | 7.0009179   | 7.1126677   | 6.5210413   |

|                 |             |             |             |             |             |             |             |             |
|-----------------|-------------|-------------|-------------|-------------|-------------|-------------|-------------|-------------|
| "Bphl"          | 6.3664525   | 6.5479804   | 6.863765    | 6.95057935  | 6.80332725  | 6.415567    | 6.94557275  | 6.8977675   |
| "Bpifa1"        | 2.3653855   | 2.3335202   | 2.2931247   | 2.3086867   | 2.3585742   | 2.3703327   | 2.352242    | 2.3451138   |
| "Bpifb1"        | 2.7578492   | 2.842041    | 2.622004    | 2.6697168   | 2.742271    | 2.7598498   | 2.747634    | 2.7339158   |
| "Bpifb5"        | 2.4078612   | 2.3798409   | 2.3143942   | 2.3622282   | 2.403277    | 2.395984    | 2.3904057   | 2.3896532   |
| "Bpnt1"         | 8.3810045   | 8.59328825  | 8.216027    | 8.47022585  | 8.564408    | 8.25886     | 8.83097315  | 8.5991772   |
| "Bptf"          | 7.22241075  | 6.7566194   | 6.940071225 | 6.852407825 | 6.808111575 | 6.941562575 | 6.982537075 | 6.93013885  |
| "Brap"          | 7.886549    | 7.6692725   | 6.303041    | 7.357536    | 7.07438815  | 7.7291267   | 6.5345845   | 7.16190215  |
| "Brca1"         | 4.6382696   | 3.59348905  | 4.2433885   | 3.62924305  | 3.3118652   | 3.8798348   | 3.57157315  | 3.3355223   |
| "Brca2"         | 2.400318    | 3.4925392   | 2.9916651   | 3.0058484   | 3.1979396   | 3.3606951   | 3.0443125   | 3.4816165   |
| "Brcc3"         | 5.842439367 | 6.1676837   | 5.831224733 | 5.8200496   | 6.0565757   | 6.171269    | 5.8407964   | 5.9854032   |
| "Brd1"          | 6.3321586   | 5.8446774   | 5.4023666   | 5.343649    | 5.904153    | 6.206792    | 5.8327785   | 5.519348    |
| "Brd2"          | 9.1614325   | 8.6223422   | 8.4894485   | 8.66241425  | 8.90959325  | 9.1181985   | 8.553736    | 8.68265565  |
| "Brd3"          | 4.238124433 | 4.934403233 | 5.122659533 | 5.1589914   | 5.1640595   | 5.132157    | 5.376886167 | 5.219168933 |
| "Brd4"          | 7.010060867 | 6.854713567 | 6.7376802   | 6.763220667 | 6.827220767 | 6.8593081   | 6.773475767 | 6.9496989   |
| "Brd7"          | 7.409667    | 7.8574977   | 7.872076    | 7.816531    | 7.471568    | 7.9097176   | 7.75474767  | 7.72999     |
| "Brd8"          | 6.287864867 | 5.806240333 | 5.587115    | 5.828602767 | 5.6019876   | 5.914721333 | 5.836456567 | 5.767099967 |
| "Brdt"          | 3.375413    | 3.3471897   | 3.085918    | 3.553812    | 3.2757459   | 3.3734872   | 3.4315681   | 3.6680071   |
| "Bre"           | 6.98210685  | 7.0109647   | 6.72258685  | 6.76272235  | 6.69552205  | 7.02797055  | 6.9115727   | 6.9042256   |
| "Bri3"          | 8.699359    | 9.833771    | 8.88117     | 9.812619    | 10.376208   | 9.616916    | 9.637237    | 10.087474   |
| "Brix1"         | 6.6881242   | 6.62120975  | 6.4559783   | 6.0531482   | 6.7042153   | 6.93425865  | 6.39177     | 6.3521005   |
| "Brms1"         | 3.60728225  | 3.1930677   | 3.03903655  | 3.0130519   | 3.10955575  | 3.09901625  | 3.05211025  | 3.0567646   |
| "Brox"          | 5.93448515  | 6.00525105  | 5.93039185  | 5.942958    | 6.00744175  | 6.1585177   | 5.83272475  | 5.94753885  |
| "Brp44"         | 13.089317   | 13.052846   | 12.91533    | 13.019307   | 13.244007   | 13.285651   | 13.699743   | 13.189349   |
| "Brp44l"        | 12.377516   | 12.550906   | 12.321643   | 12.498508   | 12.638632   | 12.260247   | 12.904768   | 12.404248   |
| "Brpf1"         | 6.6628966   | 6.192286    | 6.0192027   | 5.731383    | 6.182185    | 6.0079203   | 5.9200087   | 6.1017823   |
| "Brwd1"         | 5.07319945  | 4.9899455   | 4.74771585  | 5.127065    | 5.249600475 | 5.170682625 | 4.989425625 | 5.26358     |
| "Brwd3"         | 2.1955614   | 2.1767786   | 2.3406072   | 2.1610646   | 2.1875467   | 2.1574004   | 2.192613    | 2.7499344   |
| "Bsc12"         | 7.60477715  | 8.32565925  | 8.3612025   | 8.42354785  | 8.74766925  | 8.42113935  | 8.8644863   | 8.3828      |
| "Bsdcl1"        | 8.6485187   | 8.4393145   | 7.7859652   | 7.89646185  | 8.06028185  | 8.45398085  | 7.58354     | 7.594005    |
| "Bsg"           | 9.325917    | 9.767771    | 10.074773   | 10.063696   | 9.974782    | 9.60597     | 9.8439865   | 9.644506    |
| "Bsn"           | 2.396603    | 2.3617876   | 2.3308403   | 2.3843296   | 2.3836555   | 2.377443    | 2.379378    | 2.368639    |
| "Bst1"          | 3.1674623   | 2.5182457   | 2.5515172   | 2.4543464   | 2.5314834   | 2.528478    | 2.517345    | 2.5233512   |
| "Bst2"          | 10.613063   | 9.871438    | 11.32893    | 11.477679   | 10.52443    | 10.737256   | 10.950021   | 11.256999   |
| "Btbd1"         | 6.2763685   | 6.18568215  | 6.1555657   | 6.2458892   | 6.2076211   | 6.32131075  | 6.3418372   | 6.26750185  |
| "Btbd10"        | 5.3898325   | 5.0074005   | 5.267514    | 4.338452    | 4.545727    | 5.3620186   | 5.301427    | 4.9852014   |
| "Btbd17"        | 3.4946816   | 3.4782083   | 3.444753    | 3.462312    | 3.5313296   | 3.488753    | 3.4820836   | 3.4837415   |
| "Btbd2"         | 2.9020624   | 3.5733576   | 3.9672303   | 3.7661238   | 3.0595102   | 3.5877116   | 3.7900143   | 3.582566    |
| "Btc"           | 4.5051371   | 3.25824225  | 3.64493155  | 3.5424962   | 2.8178511   | 2.84094645  | 3.2398527   | 3.3964145   |
| "Btd"           | 9.212301    | 8.908466    | 8.460427    | 8.244444    | 8.723736    | 8.880554    | 8.533968    | 8.184385    |
| "Btf3"          | 9.355174533 | 9.1161375   | 8.675204767 | 8.634469833 | 8.913409933 | 9.054713667 | 8.949315433 | 8.865773667 |
| "Btf3l4"        | 6.894844533 | 7.50062267  | 6.92541533  | 6.797476667 | 7.073857    | 6.9299231   | 7.065945433 | 6.814811    |
| "Btg1"          | 12.0000215  | 10.462432   | 10.9689035  | 10.8456     | 10.3816445  | 10.819804   | 11.4938225  | 10.4711115  |
| "Btg2"          | 10.650811   | 6.26818925  | 7.52192885  | 6.51742325  | 5.1079687   | 6.7273531   | 6.5954602   | 5.1909583   |
| "Btg3"          | 10.059548   | 9.008291    | 7.6635413   | 7.037542    | 7.092719    | 8.086756    | 6.4226327   | 7.429233    |
| "Btk"           | 2.8786864   | 2.4734306   | 3.7689223   | 2.923448    | 2.8587546   | 2.6878672   | 3.3036718   | 2.8472486   |
| "Btln1a1"       | 3.1165192   | 3.1205344   | 2.9336705   | 3.0191112   | 3.1780114   | 3.2178674   | 3.0757666   | 3.2061105   |
| "Btln10"        | 2.469967    | 2.438879    | 2.379064    | 2.4230533   | 2.4653082   | 2.4494169   | 2.4553206   | 2.444564    |
| "Btrc"          | 2.823576    | 2.724995    | 2.6327417   | 2.6891909   | 2.7377336   | 2.7178295   | 2.9810548   | 2.79162     |
| "Bub1"          | 2.6254244   | 2.59312545  | 2.52223725  | 2.5497753   | 2.61460755  | 2.63092275  | 2.5954695   | 2.6072718   |
| "Bub1b"         | 2.598773    | 2.5717976   | 2.5457041   | 2.5567558   | 2.6750906   | 2.5764782   | 2.5819511   | 2.5639005   |
| "Bub3"          | 4.431819    | 4.46055785  | 4.56698355  | 4.40767695  | 4.3122035   | 4.442422375 | 4.453146275 | 4.464439025 |
| "Bud13"         | 4.0311694   | 4.5381136   | 4.4510837   | 4.246632    | 3.8441353   | 4.1329603   | 4.2820506   | 4.625487    |
| "Bud31"         | 7.8030725   | 7.8520769   | 7.796046033 | 7.831699    | 7.8703954   | 7.915236233 | 7.669913167 | 7.776600567 |
| "Bysl"          | 5.201796    | 5.51676655  | 5.01429275  | 4.5372146   | 5.525181    | 5.38734215  | 4.98075985  | 5.04594575  |
| "Bzw1"          | 8.36177162  | 8.43769804  | 8.37816948  | 8.203434    | 8.5182076   | 8.3140818   | 8.1688567   | 8.26249082  |
| "Bzw2"          | 6.2039933   | 6.14683035  | 6.2605112   | 5.55509385  | 6.17073535  | 6.0283246   | 5.2969188   | 5.60463115  |
| "C030006K11Rik" | 4.839726    | 6.3080463   | 5.0988708   | 5.8366575   | 6.1155467   | 5.977309    | 5.754205    | 5.603143    |
| "C030018P15Rik" | 2.347527    | 2.314146    | 2.2500274   | 2.2918978   | 2.3664556   | 2.3300014   | 2.368217    | 2.3251028   |
| "C130026l21Rik" | 2.6328798   | 2.56355635  | 2.52272715  | 2.54549565  | 2.5857978   | 2.58114195  | 2.58322845  | 2.588415    |
| "C130036L24Rik" | 2.4422753   | 2.4104924   | 2.338712    | 2.3930712   | 2.4402869   | 2.425677    | 2.422183    | 2.4214911   |
| "C1d"           | 5.985472233 | 5.917181467 | 6.012439033 | 5.935571267 | 5.848742867 | 5.425300933 | 6.280592767 | 6.0317707   |
| "C1galt1"       | 4.42681275  | 4.74009985  | 5.0051743   | 4.77956465  | 5.04774805  | 4.5836277   | 4.64676895  | 4.80757275  |
| "C1galt1c1"     | 10.026394   | 9.4749565   | 9.749003    | 9.771446    | 9.343827    | 10.364342   | 9.90307     | 9.982329    |
| "C1qa"          | 12.1525955  | 10.258055   | 11.984032   | 11.312782   | 10.752947   | 10.76297    | 11.050762   | 10.528726   |
| "C1qb"          | 12.01047883 | 10.02972833 | 11.69651033 | 10.889199   | 10.5957085  | 10.51058433 | 11.015779   | 10.356606   |
| "C1qbp"         | 10.892904   | 11.5311005  | 11.1066095  | 11.1035815  | 11.3437605  | 11.1582595  | 10.9895885  | 11.155618   |
| "C1qc"          | 10.664463   | 8.93643     | 10.778578   | 10.042162   | 9.327807    | 9.217052    | 9.608239    | 9.208605    |
| "C1ql1"         | 2.669901    | 2.6004233   | 2.5022416   | 2.6225317   | 2.655882    | 2.6505356   | 2.6327057   | 2.667276    |
| "C1ql3"         | 2.5611587   | 2.5273495   | 2.4852123   | 2.5110204   | 2.5455308   | 2.535932    | 2.5468135   | 2.5325804   |
| "C1qtnf1"       | 5.31575895  | 4.83580275  | 4.75398335  | 4.75370865  | 4.9582269   | 4.95542955  | 4.96098915  | 4.825234    |
| "C1qtnf3"       | 2.9970717   | 2.9957035   | 2.8495784   | 2.9077988   | 3.0353262   | 3.0895066   | 2.9584217   | 3.1111822   |
| "C1qtnf5"       | 2.9700434   | 2.9331558   | 2.9190164   | 3.2567368   | 3.0642478   | 2.8944657   | 2.7587028   | 2.8842587   |
| "C1qtnf6"       | 2.5103636   | 2.4711447   | 2.400131    | 2.4402413   | 2.4865718   | 2.478365    | 2.4894662   | 2.4718132   |
| "C1ra"          | 10.77115625 | 10.620878   | 10.8780985  | 10.7738135  | 10.612884   | 10.6881175  | 10.538057   | 10.749324   |
| "C1s"           | 11.308122   | 10.899709   | 11.56855    | 11.699292   | 11.548102   | 11.083654   | 11.299622   | 11.659754   |
| "C2"            | 11.2780325  | 10.8141275  | 11.411406   | 11.4391435  | 10.831758   | 11.1417695  | 10.554313   | 11.2765055  |
| "C23005212Rik"  | 3.6729145   | 3.7615178   | 4.217766    | 4.137559    | 3.8695195   | 3.8631825   | 4.0374846   | 3.9353604   |
| "C230081A13Rik" | 2.4192617   | 2.4241157   | 2.343637    | 2.3362408   | 2.4143987   | 2.3958      | 2.3962703   | 2.4116964   |
| "C230091D08Rik" | 6.30066425  | 6.9756723   | 6.49063065  | 6.6802002   | 6.6335377   | 6.5953555   | 6.7381315   | 6.86223865  |
| "C2cd2"         | 7.982027    | 8.126327    | 8.754184    | 8.586903    | 8.26129     | 7.4709387   | 8.213082    | 7.8802814   |
| "C2cd2l"        | 6.1062183   | 6.478241    | 5.1784315   | 6.185059    | 6.365683    | 7.0382137   | 6.3752375   | 6.7557373   |

|                 |             |             |             |             |             |             |             |             |
|-----------------|-------------|-------------|-------------|-------------|-------------|-------------|-------------|-------------|
| "C2cd3"         | 5.0823517   | 4.47703     | 4.8309145   | 4.862998    | 4.6706605   | 5.143861    | 4.9174776   | 4.907633    |
| "C3"            | 15.430403   | 15.348622   | 15.570737   | 15.429183   | 15.50617    | 15.391248   | 15.2884035  | 15.311826   |
| "C330006A16Rik" | 7.612752    | 8.342265    | 8.035768    | 8.185692    | 8.318155    | 8.206453    | 8.36058     | 8.088341    |
| "C330007P06Rik" | 5.8738062   | 6.20883365  | 5.8907786   | 6.07033525  | 6.0946488   | 5.9776732   | 6.14230985  | 6.1992826   |
| "C330027C09Rik" | 2.76840855  | 2.77114895  | 2.7466874   | 2.7144355   | 2.9048511   | 2.82408675  | 2.7841952   | 2.77864865  |
| "C3ar1"         | 2.2414043   | 2.4469968   | 3.6460571   | 2.98872495  | 2.419242    | 2.64231195  | 2.5101424   | 2.4813032   |
| "C4b"           | 12.67954    | 12.564623   | 13.316308   | 13.015676   | 12.97774    | 12.96694    | 12.454555   | 12.951048   |
| "C4bp-ps1"      | 4.9800005   | 5.706278    | 3.4792626   | 3.4594564   | 3.5725846   | 3.5666869   | 2.9953778   | 3.1663587   |
| "C4bp"          | 12.8650255  | 12.566943   | 13.30525    | 13.093507   | 12.949725   | 12.942384   | 12.755405   | 12.711808   |
| "C530030P08Rik" | 2.6370926   | 2.608499    | 2.5204062   | 2.5915031   | 2.6348972   | 2.638547    | 2.618826    | 2.636845    |
| "C6"            | 8.712971    | 9.591806    | 7.8991866   | 8.948856    | 6.9864545   | 9.765853    | 7.024523    | 9.265137    |
| "C630004H02Rik" | 2.389688    | 2.3600755   | 2.281341    | 2.3413305   | 2.383648    | 2.4534552   | 2.3778894   | 2.3799937   |
| "C76332"        | 3.0235217   | 3.0187933   | 2.8556557   | 2.9443758   | 3.0765994   | 3.0654192   | 3.0023906   | 3.0874672   |
| "C76472"        | 2.8643959   | 2.8774838   | 2.7873175   | 2.8140826   | 2.849278    | 2.8562102   | 2.8545809   | 2.8842154   |
| "C76533"        | 4.384376    | 4.1410017   | 3.0374007   | 3.1581848   | 3.8167648   | 3.09809     | 3.1108556   | 3.202191    |
| "C76554"        | 3.0293932   | 3.0045664   | 2.8861454   | 2.936364    | 3.055303    | 3.0713794   | 2.9658594   | 3.046872    |
| "C76614"        | 2.4668071   | 2.4415886   | 2.3593416   | 2.4234178   | 2.464268    | 2.4579992   | 2.4647212   | 2.4545827   |
| "C76628"        | 2.5291493   | 2.5020106   | 2.4340898   | 2.478529    | 2.5204775   | 2.5159961   | 2.5051236   | 2.5231478   |
| "C77027"        | 5.1562276   | 3.7477062   | 3.7312908   | 3.7074609   | 3.8129578   | 3.7277627   | 3.707241    | 3.756684    |
| "C77068"        | 2.5915885   | 2.5920618   | 2.5150006   | 2.5353312   | 2.587707    | 2.5922837   | 2.579126    | 2.569015    |
| "C77080"        | 5.6686935   | 6.9942017   | 6.957055    | 7.91029     | 7.5140295   | 7.2557664   | 7.3349566   | 8.378567    |
| "C77137"        | 2.470368    | 2.4648156   | 2.38175     | 2.4243267   | 2.5259132   | 2.4705844   | 2.4532986   | 2.5249157   |
| "C77144"        | 2.9023626   | 2.8919086   | 2.7646332   | 2.832921    | 2.9112096   | 2.933238    | 2.8581727   | 3.0217917   |
| "C77405"        | 3.7105694   | 3.6129494   | 3.4537263   | 3.609001    | 3.7038012   | 3.9171178   | 3.6230276   | 3.75202     |
| "C77609"        | 2.5342958   | 2.5114498   | 2.3701348   | 2.4809437   | 2.5339303   | 2.531021    | 2.5183392   | 2.5705967   |
| "C77614"        | 2.7722778   | 2.894757    | 2.5966482   | 2.7271073   | 2.8525395   | 2.8518107   | 2.7230047   | 2.783802    |
| "C77691"        | 2.6397898   | 2.6701453   | 2.4850698   | 2.6062832   | 2.6464262   | 2.626217    | 2.6311624   | 2.6418233   |
| "C77815"        | 3.0508106   | 3.0345726   | 2.830767    | 3.0174003   | 3.08097     | 3.080093    | 2.9639132   | 3.2815735   |
| "C78142"        | 2.4103546   | 2.3838143   | 2.2971745   | 2.346467    | 2.4127018   | 2.4016953   | 2.395361    | 2.409103    |
| "C78282"        | 2.3755705   | 2.3409157   | 2.2726064   | 2.3163006   | 2.3624341   | 2.3562758   | 2.362303    | 2.3475988   |
| "C78339"        | 11.278383   | 11.390577   | 11.1715865  | 11.340279   | 11.355456   | 11.484521   | 11.406745   | 11.4049765  |
| "C78344"        | 3.0497394   | 3.0529957   | 2.913872    | 2.9523447   | 3.1303804   | 3.1153398   | 3.0115356   | 3.134138    |
| "C78532"        | 2.856749    | 2.8241038   | 2.6931565   | 2.742228    | 2.8661706   | 2.9145584   | 2.757249    | 2.9469562   |
| "C78704"        | 2.3621247   | 2.328126    | 2.2650065   | 2.310811    | 2.343038    | 2.33879     | 2.317852    | 2.3875623   |
| "C78878"        | 2.7864518   | 2.787815    | 2.6673589   | 2.7148626   | 2.827055    | 2.8834577   | 2.782253    | 2.9472203   |
| "C78891"        | 2.5584865   | 2.5439386   | 2.468244    | 2.5051022   | 2.5657654   | 2.5782897   | 2.5479426   | 2.6177335   |
| "C79122"        | 2.825648    | 2.7985036   | 2.675887    | 2.769978    | 2.8261034   | 2.809169    | 2.7736611   | 2.823004    |
| "C79130"        | 2.758104    | 2.7284932   | 2.687883    | 2.678348    | 2.7682116   | 2.7706509   | 2.7492926   | 2.7687883   |
| "C79242"        | 4.229908    | 4.7229943   | 4.313896    | 4.7418017   | 4.838638    | 4.680323    | 4.5987606   | 5.335366    |
| "C79246"        | 2.9835966   | 2.9594722   | 2.8436377   | 2.9186819   | 3.042878    | 2.9957654   | 2.954586    | 2.997034    |
| "C79452"        | 2.481348    | 2.4459972   | 2.3629773   | 2.4247465   | 2.4687872   | 2.4648707   | 2.4516428   | 2.4757984   |
| "C79468"        | 4.2455893   | 5.950982    | 5.4668927   | 5.6956058   | 6.3062687   | 6.408034    | 5.9544315   | 6.0074787   |
| "C79562"        | 3.1426458   | 3.125498    | 3.0371158   | 3.104949    | 3.1439202   | 3.1404347   | 3.0809712   | 3.149687    |
| "C80012"        | 3.4468274   | 3.4139993   | 3.1988134   | 3.3980849   | 3.4290547   | 3.4236689   | 3.543292    | 3.5407395   |
| "C80060"        | 2.510179    | 2.4821427   | 2.4162192   | 2.4446697   | 2.5142794   | 2.513072    | 2.4866343   | 2.5143175   |
| "C80068"        | 2.6024294   | 3.6052122   | 2.9959633   | 3.121592    | 2.8757505   | 3.168409    | 3.0693222   | 3.0616882   |
| "C80425"        | 2.8915563   | 2.8781567   | 2.7600093   | 2.8251612   | 2.9317825   | 2.9159608   | 2.9062133   | 3.2945883   |
| "C80719"        | 2.975578    | 2.9487727   | 2.8050427   | 2.891136    | 2.977958    | 2.9962904   | 2.9271672   | 3.0149155   |
| "C80913"        | 7.615198667 | 7.611906333 | 6.930797667 | 7.347246867 | 7.535907433 | 7.589229667 | 7.2972478   | 7.9305882   |
| "C80993"        | 2.6214504   | 2.5741713   | 2.475359    | 2.5474901   | 2.6065443   | 2.601656    | 2.5833383   | 2.5993772   |
| "C81600"        | 2.669678    | 2.6372879   | 2.7854648   | 2.6172411   | 2.6790438   | 2.6426456   | 2.4712222   | 2.667331    |
| "C86187"        | 2.455309    | 2.425941    | 2.377776    | 2.3883517   | 2.4525254   | 2.452529    | 2.445405    | 2.4399805   |
| "C87436"        | 4.185127    | 4.7595515   | 3.7194283   | 5.2720413   | 4.822246    | 5.3800297   | 4.810682    | 5.036861    |
| "C8a"           | 12.244214   | 12.780129   | 12.66153    | 13.145909   | 12.226593   | 13.106517   | 12.311018   | 13.481541   |
| "C8b"           | 10.482036   | 11.821335   | 10.903576   | 11.68482    | 10.372068   | 11.446585   | 10.2369995  | 11.614105   |
| "C8g"           | 12.2323675  | 13.004322   | 12.820343   | 13.592868   | 13.344589   | 13.242109   | 13.572809   | 13.6336     |
| "C9"            | 11.599366   | 12.282946   | 12.203073   | 12.578372   | 11.3744335  | 12.85815    | 11.165736   | 13.150328   |
| "C920021L13Rik" | 2.5333815   | 3.1000857   | 2.466279    | 2.5708313   | 2.7915277   | 3.0571856   | 2.5603914   | 2.5727725   |
| "C920025E04Rik" | 7.6373189   | 7.7081349   | 7.9959324   | 8.3906631   | 7.72552175  | 7.5817102   | 7.87808445  | 7.82832015  |
| "Cab39"         | 8.53671     | 8.4799585   | 7.80254425  | 7.757995    | 8.36600975  | 8.246939    | 7.9844715   | 8.0733485   |
| "Cab39l"        | 6.452767833 | 6.6321695   | 5.939714033 | 6.0787934   | 6.024628967 | 6.163198133 | 6.108158233 | 6.206198    |
| "Cables1"       | 4.225107    | 3.3813872   | 3.4947407   | 3.6057098   | 3.127604    | 4.0296483   | 3.5737913   | 2.747825    |
| "Cables2"       | 5.4460425   | 5.5752225   | 5.483091    | 6.0001326   | 5.4416323   | 5.4747634   | 5.2972226   | 5.970058    |
| "Cabp2"         | 2.451453    | 2.4179204   | 2.3420627   | 2.391202    | 2.440045    | 2.4405487   | 2.4411469   | 2.434337    |
| "Cabp4"         | 2.5390701   | 2.5036006   | 2.4171958   | 2.4749346   | 2.533994    | 2.5151758   | 2.5232937   | 2.5278225   |
| "Cabp5"         | 2.5205543   | 2.4873703   | 2.413514    | 2.4465032   | 2.517623    | 2.515203    | 2.5043795   | 2.517564    |
| "Cabyr"         | 2.4833624   | 2.4333723   | 2.2642992   | 2.2972782   | 2.4108975   | 2.399811    | 2.3432646   | 3.9065301   |
| "Cacfd1"        | 4.215904533 | 4.382189133 | 4.137075333 | 4.108032933 | 4.231626533 | 4.1922118   | 4.091081633 | 4.186984333 |
| "Cachd1"        | 2.7134056   | 2.72744     | 2.792818    | 2.7167175   | 2.7487981   | 2.7411993   | 3.090613    | 2.7668843   |
| "Cacna1a"       | 2.5053203   | 2.69968455  | 2.40595875  | 2.5066331   | 2.52239895  | 2.55341325  | 2.4930165   | 2.5175362   |
| "Cacna1d"       | 3.5835974   | 3.6678097   | 3.996944    | 3.9234343   | 3.640499    | 3.7416804   | 3.6640787   | 3.857866    |
| "Cacna1h"       | 2.6181421   | 2.5936913   | 2.4982648   | 2.5324197   | 2.6077468   | 2.6118622   | 2.6076279   | 2.6043386   |
| "Cacna2d1"      | 2.954072    | 2.9395044   | 2.795764    | 2.853588    | 2.9915106   | 2.9992023   | 2.9111657   | 3.0117285   |
| "Cacna2d2"      | 2.794579833 | 2.7828539   | 2.669707267 | 2.705031633 | 3.057110033 | 2.857071    | 2.7279737   | 2.894328033 |
| "Cacna2d3"      | 2.5562575   | 2.5340126   | 2.487863    | 2.5118597   | 2.56945     | 2.5499647   | 2.5559757   | 2.5459087   |
| "Cacnb1"        | 3.1533642   | 3.2706022   | 2.953925    | 3.032995    | 3.5985928   | 3.1357603   | 3.0775828   | 3.1267147   |
| "Cacnb2"        | 2.4798694   | 2.455389    | 2.3707676   | 2.42739     | 2.4871566   | 2.4739408   | 2.467261    | 2.4671862   |
| "Cacnb4"        | 5.2098595   | 2.6610986   | 2.55797545  | 2.60725265  | 2.69881005  | 2.70630585  | 2.65645765  | 2.6909106   |
| "Cacng3"        | 2.514978    | 2.482008    | 2.411028    | 2.4665532   | 2.5414007   | 2.4926      | 2.481011    | 2.4857213   |
| "Cacng6"        | 2.9459836   | 2.9365046   | 2.798871    | 2.8495135   | 2.983297    | 2.9823728   | 2.9061542   | 2.9858541   |
| "Cacybp"        | 8.996842    | 8.527472    | 9.088161    | 8.602147    | 8.879463    | 9.485109    | 9.278803    | 9.012757    |

|            |             |             |             |             |             |             |             |             |
|------------|-------------|-------------|-------------|-------------|-------------|-------------|-------------|-------------|
| "Cad"      | 3.2927351   | 3.4072318   | 3.4106238   | 3.2046318   | 4.1758521   | 3.4000975   | 3.30635355  | 3.2746183   |
| "Cadm1"    | 6.550707625 | 5.535976275 | 7.05685885  | 6.508150675 | 6.874348675 | 6.09501175  | 6.86999225  | 6.738909    |
| "Cadm3"    | 2.6076994   | 2.58929995  | 2.5630274   | 2.56880045  | 2.62099935  | 2.6039402   | 2.54256525  | 2.609524    |
| "Cadm4"    | 5.309034    | 5.4919043   | 3.960777    | 4.249323    | 4.0554013   | 4.020292    | 3.1724777   | 3.8522222   |
| "Cadps"    | 2.4633648   | 2.4348946   | 2.355801    | 2.3906415   | 2.4731207   | 2.4566307   | 2.4507074   | 2.4477692   |
| "Cadps2"   | 7.5338774   | 7.531279    | 7.6312995   | 7.3750634   | 7.984467    | 7.9579525   | 7.77685     | 8.186458    |
| "Calb1"    | 2.7047148   | 2.6779304   | 2.5905528   | 2.6146655   | 2.7195141   | 2.717158    | 2.6764216   | 2.7153394   |
| "Calcoco2" | 3.1308854   | 3.1179953   | 2.9500253   | 3.0637894   | 3.203891    | 3.2016978   | 3.0503778   | 3.2153356   |
| "Calcr"    | 2.4063208   | 2.3856719   | 2.3193903   | 2.3319654   | 2.4259667   | 2.399947    | 2.3905127   | 2.4230294   |
| "Calcrl"   | 8.108368    | 7.6116295   | 8.517521    | 8.381908    | 8.409197    | 8.222584    | 9.15053     | 8.210028    |
| "Cald1"    | 10.66912083 | 10.370681   | 11.14041533 | 10.9026135  | 10.62526367 | 10.48552833 | 11.240439   | 10.68164067 |
| "Calhm2"   | 4.1680474   | 3.9939735   | 5.1689773   | 4.5799246   | 4.629646    | 4.7132053   | 4.52061     | 4.2656727   |
| "Calm1"    | 8.607614044 | 8.482845233 | 9.224818944 | 8.898231989 | 8.4849172   | 8.232259156 | 9.090298144 | 8.908538911 |
| "Calml3"   | 2.392133    | 2.814149    | 2.2848735   | 2.32689     | 2.3823228   | 2.3736863   | 2.356344    | 2.3672328   |
| "Calml4"   | 5.503011    | 4.9326043   | 4.4151874   | 5.278104    | 4.980024    | 3.8091207   | 5.002865    | 4.8553405   |
| "Caln1"    | 2.3867977   | 2.3537655   | 2.26081     | 2.3159792   | 2.3904595   | 2.3718138   | 2.5182629   | 2.3667727   |
| "Calr"     | 10.30728567 | 10.367379   | 10.8265     | 10.90245233 | 11.83176583 | 11.71251133 | 11.582376   | 11.76190967 |
| "Calu"     | 9.580752    | 9.069971    | 9.748651    | 9.227202    | 9.262904    | 8.973094    | 9.190199    | 9.27802     |
| "Camk1"    | 3.91051305  | 3.82337405  | 4.1925468   | 3.9535721   | 4.0777645   | 4.15330705  | 4.52064095  | 4.2465061   |
| "Camk1d"   | 8.862339    | 8.10773615  | 8.808403    | 8.6561577   | 7.9718258   | 7.3299255   | 8.9733555   | 7.84298275  |
| "Camk2a"   | 2.6419196   | 2.6191094   | 2.560649    | 2.6014483   | 2.6483815   | 2.6449912   | 2.612004    | 2.673895    |
| "Camk2b"   | 4.044317    | 5.3280034   | 4.027534    | 5.0458474   | 4.1318703   | 4.517857    | 4.6444473   | 4.1939673   |
| "Camk2c"   | 4.2674654   | 3.7688756   | 3.88718165  | 3.52803465  | 3.8560512   | 3.84025765  | 3.923712    | 3.60148365  |
| "Camk2g"   | 5.7258754   | 5.7573133   | 5.722828    | 5.702723    | 5.6183705   | 5.7661533   | 5.8087444   | 6.074833    |
| "Camk4"    | 2.3961627   | 2.3710523   | 2.297915    | 2.3265667   | 2.3882062   | 2.3931658   | 2.3839784   | 2.3792734   |
| "Camkk1"   | 2.7064168   | 2.7178454   | 2.7389998   | 2.5990736   | 2.6870136   | 2.6975489   | 2.5877333   | 2.6754599   |
| "Camkk2"   | 6.6891558   | 5.96342685  | 6.5617645   | 5.8164356   | 5.96780865  | 6.16763535  | 6.3580234   | 5.58590415  |
| "Camkv"    | 2.3996723   | 2.3725727   | 2.334184    | 2.3563046   | 2.3974373   | 2.389473    | 2.3896549   | 2.3842295   |
| "Caml"     | 8.434054    | 8.076721    | 7.982498    | 7.909244    | 8.002495    | 8.23061     | 8.216903    | 7.873225    |
| "Camp"     | 6.927483    | 3.6328833   | 6.074024    | 4.475555    | 2.9262881   | 7.0691605   | 3.6560776   | 2.434845    |
| "Camsap1"  | 5.576277    | 5.28880775  | 4.93748825  | 5.17318625  | 5.52053725  | 5.4095842   | 5.205236    | 5.275997    |
| "Camta2"   | 2.896084    | 3.091976    | 2.7995677   | 2.8681667   | 2.997797    | 2.8773212   | 2.881071    | 2.82775     |
| "Cand1"    | 5.55215425  | 5.46116815  | 5.26930825  | 5.27554175  | 5.35505315  | 5.516957    | 5.32958275  | 5.39957615  |
| "Cant1"    | 5.4114418   | 5.7150645   | 5.42454885  | 5.3840289   | 5.3909232   | 5.4095267   | 5.1359039   | 5.3844899   |
| "Canx"     | 9.231234    | 9.286842533 | 9.541618333 | 9.526686    | 9.8373562   | 9.626803233 | 9.880406167 | 9.756446867 |
| "Cap1"     | 5.09463765  | 4.86858565  | 5.86603955  | 5.04208925  | 5.2082393   | 4.84406245  | 5.1423725   | 4.96725015  |
| "Cap2"     | 2.51162     | 2.4825244   | 2.4649305   | 2.4866867   | 2.5101585   | 2.4973702   | 2.5117788   | 2.4915094   |
| "Capg"     | 4.2909794   | 3.5993705   | 4.078338    | 4.2968936   | 4.037993    | 3.858887    | 4.0260606   | 4.0062146   |
| "Capn10"   | 7.952046    | 6.895364    | 7.023448    | 6.1875386   | 7.103958    | 6.6512556   | 6.8527975   | 6.76935     |
| "Capn12"   | 2.702333    | 2.576165    | 2.4926338   | 2.511078    | 2.5928342   | 2.5881186   | 2.5759265   | 2.5818217   |
| "Capn2"    | 8.011282    | 8.478829    | 8.647798    | 8.490757    | 8.697714    | 8.519919    | 9.010831    | 8.842981    |
| "Capn6"    | 2.4865656   | 2.3615096   | 3.652404    | 2.4220104   | 2.4541688   | 2.3713946   | 2.5542533   | 2.324024    |
| "Capn7"    | 7.9538868   | 7.916547533 | 7.476922333 | 7.870841767 | 7.923799167 | 8.063611    | 8.169159833 | 7.9939839   |
| "Capn8"    | 2.1492884   | 2.8703432   | 2.0239995   | 2.1033034   | 2.183692    | 2.138785    | 2.1248984   | 2.124549    |
| "Capns1"   | 7.483551    | 7.8482304   | 8.082224    | 8.18401     | 7.907883    | 7.3074107   | 7.908699    | 8.0053625   |
| "Caprin1"  | 8.190414633 | 8.217929533 | 8.231362    | 7.96296685  | 7.939797167 | 8.326764967 | 8.40442875  | 7.86137725  |
| "Caprin2"  | 3.000414    | 2.9606636   | 3.08976     | 2.966238    | 2.9893525   | 2.9790428   | 4.0534477   | 2.9731388   |
| "Capza1"   | 9.8411505   | 9.161464    | 9.72445325  | 9.464745    | 9.42684075  | 9.30130175  | 9.8192465   | 9.40748     |
| "Capza2"   | 10.727788   | 10.4827205  | 10.6904225  | 10.56963    | 10.5019355  | 10.521196   | 10.537586   | 10.386644   |
| "Capza3"   | 2.4621778   | 2.4313169   | 2.3561792   | 2.3901174   | 2.4596128   | 2.4560883   | 2.4505928   | 2.4528718   |
| "Capzb"    | 7.067969875 | 7.0022528   | 7.2004943   | 6.965504725 | 6.993554425 | 6.772462975 | 6.8391524   | 6.8339332   |
| "Car1"     | 2.9442446   | 3.1172209   | 3.081249    | 3.7092056   | 3.153889    | 2.9435277   | 3.220383    | 3.5185995   |
| "Car10"    | 2.71492     | 2.6914916   | 2.5925598   | 2.6272242   | 2.7396197   | 2.737977    | 2.688524    | 2.7189984   |
| "Car13"    | 2.509186    | 2.4457889   | 2.3958464   | 2.4136772   | 2.471538    | 2.4615924   | 2.4611723   | 2.4886081   |
| "Car14"    | 3.416411    | 8.037131    | 6.721324    | 7.6498356   | 8.139413    | 7.8935056   | 7.938424    | 7.841442    |
| "Car2"     | 6.6258345   | 7.256728    | 8.520249    | 7.663356    | 8.3211      | 6.951492    | 8.394501    | 6.7179575   |
| "Car3"     | 4.3422291   | 7.2460488   | 10.214992   | 12.36362425 | 9.52213475  | 4.88740565  | 12.847066   | 12.784056   |
| "Car4"     | 2.9213946   | 2.898994    | 2.8350236   | 2.8637626   | 2.9107435   | 2.9124315   | 2.9102004   | 2.8959463   |
| "Car5a"    | 6.6243486   | 8.106196    | 9.0246525   | 9.355642    | 8.142422    | 7.271661    | 9.129918    | 8.751539    |
| "Car5b"    | 2.4082015   | 2.3942933   | 2.3567317   | 2.3702955   | 2.4138362   | 2.4051886   | 2.406701    | 2.4046438   |
| "Car7"     | 2.4525578   | 2.4041886   | 2.3237906   | 2.3787513   | 2.4240198   | 2.4142299   | 2.4118125   | 2.409078    |
| "Car8"     | 6.37579105  | 6.2914616   | 7.13266435  | 7.65418225  | 6.9999215   | 5.91433905  | 7.8094478   | 7.880449    |
| "Car9"     | 2.1907656   | 2.1572638   | 2.4134016   | 2.1569576   | 2.1798577   | 2.1720204   | 2.1886392   | 2.1712625   |
| "Card10"   | 5.0877805   | 4.586815    | 5.4701233   | 5.6713424   | 5.349899    | 5.612438    | 5.6944356   | 5.8970594   |
| "Carf"     | 2.8242478   | 2.8178792   | 2.679787    | 2.7410774   | 3.1372132   | 2.838411    | 2.792006    | 2.908212    |
| "Carhsp1"  | 7.03613315  | 7.733597    | 7.61452915  | 8.13600585  | 7.7066646   | 7.5050775   | 7.96739035  | 7.79983915  |
| "Carkd"    | 8.517389    | 9.065383    | 8.939836    | 8.799545    | 8.931991    | 9.063978    | 8.928229    | 8.82783     |
| "Carm1"    | 4.837612    | 4.663814    | 5.1193333   | 4.5529275   | 4.6436734   | 4.6881957   | 4.6739345   | 4.655083    |
| "Carns1"   | 2.4850738   | 2.4502683   | 2.4034305   | 2.4281123   | 2.472835    | 2.4827929   | 2.441761    | 2.4817355   |
| "Cars"     | 5.559757    | 5.5060797   | 5.696648    | 5.326373    | 6.0292473   | 6.0290437   | 6.3275576   | 6.1326013   |
| "Casc3"    | 6.3444104   | 5.980042    | 6.1608095   | 5.7935658   | 5.8284826   | 5.9044313   | 5.623096    | 5.723417    |
| "Casd1"    | 6.08473325  | 6.1658516   | 6.1263643   | 6.2274045   | 6.0686195   | 6.37575975  | 6.2768995   | 6.280259    |
| "Cask"     | 4.960465467 | 5.217157933 | 4.6537289   | 5.1738157   | 5.115300333 | 5.3452996   | 4.880812167 | 5.220622533 |
| "Caskin2"  | 7.082817    | 7.90794     | 8.870847    | 8.100662    | 7.1799455   | 7.8260655   | 8.854594    | 7.5315      |
| "Casp1"    | 6.507233    | 5.6971483   | 7.396543    | 6.8754716   | 6.374372    | 6.042807    | 7.0683007   | 6.42036     |
| "Casp12"   | 3.71186455  | 2.8555151   | 4.669486    | 3.9313698   | 3.51967585  | 3.3224659   | 3.76209735  | 3.7398865   |
| "Casp2"    | 5.098389    | 4.863166    | 5.1358914   | 5.031264    | 4.578066    | 4.783334    | 4.901821    | 4.511727    |
| "Casp3"    | 5.90401815  | 4.8934957   | 6.18701515  | 5.3770057   | 5.09041     | 4.46538665  | 5.63018285  | 5.55169715  |
| "Casp4"    | 4.825219    | 3.9677248   | 4.7439923   | 4.4284782   | 3.8795493   | 4.072073    | 4.1228013   | 4.1177096   |
| "Casp6"    | 8.003623    | 7.794117    | 8.726739    | 8.804964    | 8.121517    | 7.9485154   | 8.940638    | 8.710012    |
| "Casp7"    | 5.94133265  | 6.3274836   | 6.8952727   | 7.1773002   | 6.478254    | 5.4097912   | 6.7522425   | 6.69905625  |

|             |             |             |             |             |             |             |             |             |
|-------------|-------------|-------------|-------------|-------------|-------------|-------------|-------------|-------------|
| "Casp8"     | 7.533629    | 8.482045    | 8.308955    | 8.344116    | 8.671517    | 8.00589     | 8.512016    | 8.374741    |
| "Casp8ap2"  | 6.334088    | 5.886875    | 5.3836017   | 5.901348    | 5.95673     | 6.3374343   | 6.493215    | 5.967797    |
| "Casp9"     | 4.33945085  | 4.45176095  | 4.643364    | 4.64780575  | 4.3563024   | 4.49270785  | 4.5651175   | 4.6105829   |
| "Casq1"     | 2.5321329   | 2.497994    | 2.4696064   | 2.4787679   | 2.5276303   | 2.5086923   | 2.5211205   | 2.4985347   |
| "Casq2"     | 2.4364371   | 2.3990986   | 2.3689427   | 2.3560119   | 2.422617    | 2.431947    | 2.4140613   | 2.4072912   |
| "Casr"      | 2.5578897   | 2.5301428   | 2.4927566   | 2.4830482   | 2.5591812   | 2.555861    | 2.543095    | 2.553618    |
| "Cast"      | 7.44518975  | 7.5380255   | 6.953488    | 7.07440085  | 6.95879865  | 6.9546747   | 7.0522762   | 7.23338775  |
| "Cat"       | 13.546743   | 13.792844   | 13.60677025 | 13.9070445  | 13.801648   | 13.5789015  | 14.4640875  | 14.0130385  |
| "Catsper1"  | 2.6445534   | 2.6156514   | 2.5810492   | 2.5882485   | 2.630465    | 2.6207256   | 2.6329691   | 2.6157517   |
| "Catsper2"  | 4.153378    | 4.63623     | 4.0787597   | 4.5139728   | 4.487795    | 4.7365417   | 4.1315713   | 4.407902    |
| "Catsperg1" | 2.3152835   | 2.288582    | 2.2564301   | 2.4393501   | 2.3186758   | 2.30946     | 2.3220093   | 2.2979276   |
| "Cav1"      | 4.941878    | 5.8549156   | 5.852697    | 5.4290357   | 4.753355    | 4.2422304   | 5.065697    | 4.934061    |
| "Cav2"      | 5.18818405  | 4.8625694   | 4.9140395   | 5.2285952   | 4.9489211   | 4.66746855  | 5.08384225  | 5.097679    |
| "Cbfa2t2"   | 6.8668084   | 6.959159    | 6.6099215   | 7.107534    | 6.9714136   | 7.0502033   | 6.6863413   | 7.141218    |
| "Cbfa2t3"   | 3.12269325  | 3.0046809   | 2.941387225 | 3.024955225 | 3.151635275 | 3.021642825 | 3.031806325 | 3.068762825 |
| "Cbfb"      | 9.02243     | 9.204571    | 9.736853    | 9.346444    | 9.265964    | 9.395569    | 8.909066    | 9.396698    |
| "Cbl"       | 6.528232    | 5.4416957   | 6.6789083   | 6.1801925   | 6.064499    | 6.163547    | 6.1032033   | 5.6963763   |
| "Cblc"      | 4.4803062   | 4.46773275  | 4.038662    | 4.2697879   | 3.51048925  | 4.1145142   | 4.1867081   | 4.51125485  |
| "Cbl1"      | 6.57793045  | 6.1165622   | 6.2151017   | 6.224513    | 6.26212075  | 6.3037947   | 6.45678035  | 6.2774923   |
| "Cbln3"     | 2.4423168   | 2.4143825   | 2.3844547   | 2.393146    | 2.4336014   | 2.4214993   | 2.4361832   | 2.431282    |
| "Cbr1"      | 11.116041   | 11.568385   | 11.993709   | 11.017758   | 10.966819   | 10.941927   | 10.170694   | 9.852611    |
| "Cbr3"      | 6.77395     | 7.4502926   | 8.72015     | 7.2858653   | 4.28032     | 4.4315543   | 3.949214    | 3.487478    |
| "Cbr4"      | 8.048214    | 9.194727    | 9.062861    | 8.944582    | 8.939873    | 8.525525    | 8.697752    | 8.950151    |
| "Cbs"       | 9.388005    | 9.0010297   | 9.8807815   | 10.143371   | 9.5704625   | 9.743527    | 10.6667445  | 10.0270435  |
| "Cbwd1"     | 6.20677     | 5.365485    | 4.6429768   | 5.018682    | 5.139032    | 4.9583173   | 5.300635    | 5.4570594   |
| "Cbx1"      | 4.90298588  | 4.82727186  | 4.99010986  | 5.04833024  | 5.02803522  | 5.02950708  | 5.10372238  | 5.16677004  |
| "Cbx2"      | 4.488969    | 2.8562782   | 2.5784166   | 2.6187592   | 2.434333    | 2.8289242   | 2.9121342   | 2.2303045   |
| "Cbx3"      | 8.14328705  | 8.232281675 | 7.8773565   | 8.044929325 | 7.98545735  | 8.0811699   | 8.1499008   | 8.163703175 |
| "Cbx4"      | 9.80408     | 8.8880415   | 8.455476    | 9.292694    | 8.443611    | 8.736963    | 9.035117    | 8.811755    |
| "Cbx5"      | 3.238370033 | 3.9693508   | 4.1958481   | 3.9218998   | 3.825455133 | 3.563210033 | 3.9038439   | 4.052885167 |
| "Cbx6"      | 3.7953806   | 3.8777034   | 3.805625    | 4.2767053   | 4.0889087   | 4.013513    | 3.9013128   | 3.7880008   |
| "Cbx7"      | 2.4045277   | 2.3716717   | 2.3210626   | 2.345027    | 2.3880339   | 2.381205    | 2.392827    | 2.3785348   |
| "Cbx8"      | 2.61531995  | 2.41196835  | 2.52114735  | 2.53514085  | 2.54039335  | 2.57377025  | 2.58433915  | 2.7442578   |
| "Cby1"      | 3.240992    | 3.3935127   | 3.7764816   | 4.444006    | 4.0451074   | 3.8572874   | 4.357762    | 3.601392    |
| "Cc2d1a"    | 3.4413953   | 3.3113017   | 3.031854    | 2.9438777   | 3.2278357   | 3.7094584   | 3.092763    | 3.0756423   |
| "Ccbl2"     | 12.23018    | 10.978895   | 11.378826   | 10.748899   | 11.710675   | 11.768689   | 11.235268   | 11.708918   |
| "Cccl101"   | 6.264334967 | 6.7385401   | 5.768826367 | 6.019828633 | 6.5322907   | 7.362022233 | 6.618636033 | 7.077921667 |
| "Cccl102a"  | 3.6174152   | 3.731965    | 3.6071877   | 3.5217476   | 3.6528702   | 3.6844187   | 3.9385524   | 3.7101567   |
| "Cccl104"   | 8.513456    | 8.85918     | 8.317318    | 8.179364    | 7.865241    | 7.7777057   | 8.063815    | 7.627414    |
| "Cccl107"   | 8.321714    | 8.930304    | 8.385551    | 9.061285    | 9.081226    | 8.996723    | 9.178913    | 8.902378    |
| "Cccl109b"  | 2.1730099   | 2.4350212   | 2.5418913   | 2.1164834   | 2.1576877   | 2.1471868   | 2.1446152   | 2.1424425   |
| "Cccl115"   | 7.9026475   | 7.304464    | 7.0148497   | 7.113843    | 7.585466    | 7.643598    | 7.2156444   | 7.111773    |
| "Cccl117"   | 4.6570128   | 4.92874905  | 5.09670225  | 5.14695265  | 5.71751665  | 5.15880755  | 4.957524    | 5.8746755   |
| "Cccl12"    | 7.4306415   | 7.395751    | 7.64960165  | 7.4026915   | 7.0411595   | 6.97908985  | 7.4513915   | 7.3637205   |
| "Cccl120"   | 3.7030785   | 2.5487301   | 2.537486    | 2.5081244   | 2.5641944   | 2.5581012   | 2.5466805   | 2.5513682   |
| "Cccl123"   | 3.6471754   | 3.87811935  | 3.8109574   | 3.80515755  | 3.97967035  | 3.87187     | 3.8539715   | 4.1818842   |
| "Cccl129"   | 6.8292317   | 6.4739795   | 6.5643783   | 6.5961614   | 6.404866    | 6.563474    | 6.720513    | 6.731295    |
| "Cccl130"   | 2.7722063   | 2.8983173   | 2.783125    | 2.6003108   | 2.729379    | 2.749443    | 2.5579455   | 2.8116884   |
| "Cccl132"   | 5.8695507   | 6.0467343   | 6.033886    | 6.1023083   | 6.1986475   | 6.4195232   | 6.2125273   | 6.246435    |
| "Cccl134"   | 2.0529957   | 2.080906    | 2.0072951   | 2.0249903   | 2.8711452   | 2.2686198   | 2.1023626   | 2.0919285   |
| "Cccl136"   | 2.6950717   | 2.6714592   | 2.6243553   | 2.649458    | 2.6919198   | 2.677696    | 2.6930277   | 2.6752346   |
| "Cccl137"   | 4.5036774   | 4.4895563   | 4.8955755   | 4.4716444   | 4.845995    | 4.691564    | 4.4809823   | 4.507203    |
| "Cccl142"   | 9.170994    | 9.393578    | 9.357962    | 9.306734    | 9.242227    | 9.664718    | 9.435829    | 9.411072    |
| "Cccl159"   | 2.6519904   | 2.623286    | 2.5783558   | 2.5942495   | 2.6363268   | 2.628487    | 2.640545    | 2.6330886   |
| "Cccl163"   | 3.0907      | 2.8842254   | 2.4279828   | 2.8554199   | 2.9367297   | 2.8946002   | 2.9236417   | 2.8916261   |
| "Cccl21"    | 5.671348    | 5.819428    | 5.647261    | 6.306513    | 5.26743     | 5.179853    | 5.6406503   | 6.2280874   |
| "Cccl22"    | 6.94365635  | 6.35062335  | 6.51586115  | 6.5846607   | 6.73335515  | 7.46261585  | 6.9470899   | 6.95472915  |
| "Cccl23"    | 7.941767    | 8.088719    | 8.937784    | 8.185692    | 8.165074    | 7.6291857   | 8.310571    | 8.006691    |
| "Cccl25"    | 3.1941867   | 5.7914977   | 7.3620834   | 5.064076    | 3.180711    | 3.3138962   | 3.340265    | 5.3375826   |
| "Cccl28a"   | 4.67716205  | 4.6952195   | 4.4895958   | 4.78859605  | 4.5645733   | 4.5975876   | 4.5552108   | 4.53433225  |
| "Cccl34"    | 2.7305434   | 2.6460276   | 2.5393696   | 2.712536    | 2.7009852   | 2.7070968   | 2.738771    | 2.8021588   |
| "Cccl43"    | 6.1310335   | 5.6989892   | 5.74791035  | 5.6760797   | 5.7734138   | 6.0325465   | 5.90764285  | 5.711387    |
| "Cccl45"    | 3.0490415   | 2.9562979   | 2.8818924   | 3.3825307   | 3.0286257   | 3.0186653   | 3.0100613   | 3.438262    |
| "Cccl46"    | 3.12397615  | 3.1551557   | 3.05361275  | 3.111941    | 3.2080228   | 3.2245338   | 3.0168158   | 3.20920255  |
| "Cccl47"    | 9.115911667 | 9.143150667 | 8.950042    | 8.924565433 | 9.297932767 | 9.2521196   | 8.884370833 | 9.005877667 |
| "Cccl48"    | 2.47223     | 2.444669    | 2.374117    | 2.4052217   | 2.4675643   | 2.4624164   | 2.4588814   | 2.4584332   |
| "Cccl50"    | 5.23043455  | 5.665219475 | 5.83976625  | 5.82815945  | 5.580908175 | 5.32677645  | 5.921049225 | 5.874207    |
| "Cccl53"    | 5.6169798   | 5.7817385   | 5.69115235  | 5.90059185  | 5.6492055   | 5.8003285   | 5.7769155   | 5.81364075  |
| "Cccl56"    | 8.4356857   | 8.7454645   | 9.591424    | 9.0816357   | 8.6319805   | 8.7254148   | 8.92597765  | 9.036002    |
| "Cccl58"    | 8.074833    | 8.756198    | 8.529921    | 8.533523    | 8.5452      | 8.822103    | 8.795873    | 9.0833845   |
| "Cccl59"    | 8.227594    | 7.7488422   | 7.4377418   | 7.3397636   | 7.5809417   | 7.314724    | 7.7216525   | 7.414692    |
| "Cccl6"     | 8.114491    | 8.149469    | 7.692922    | 7.908918    | 7.7088575   | 7.981969    | 7.3772454   | 7.796964    |
| "Cccl64"    | 2.5433354   | 2.5211446   | 2.4887834   | 2.471477    | 2.5378828   | 2.5365276   | 2.5434694   | 2.583735    |
| "Cccl65"    | 2.8598833   | 2.8294146   | 2.7035723   | 2.8026192   | 2.8530989   | 2.9979482   | 2.8376775   | 2.8716502   |
| "Cccl70"    | 2.9026172   | 2.8805645   | 2.7459137   | 2.805091    | 2.9399207   | 2.9425564   | 2.8760128   | 2.9071267   |
| "Cccl71"    | 5.8330684   | 5.583828    | 5.806461    | 6.030074    | 5.5204687   | 5.575623    | 5.631424    | 5.423968    |
| "Cccl72"    | 12.009666   | 11.9033165  | 12.577492   | 12.2713585  | 11.962468   | 11.814846   | 12.167564   | 12.0687     |
| "Cccl77"    | 2.98744855  | 3.0976988   | 3.0434435   | 3.3984502   | 3.11475545  | 3.1220558   | 3.2783108   | 3.57837725  |
| "Cccl80"    | 5.3669958   | 5.3171349   | 6.0745635   | 5.49676145  | 5.260337    | 5.1676522   | 5.43356025  | 5.2648013   |
| "Cccl82"    | 2.7359166   | 2.7323132   | 2.6885982   | 2.6830585   | 2.7644253   | 2.7580338   | 2.7047062   | 2.7986615   |
| "Cccl84"    | 6.10701515  | 5.66448285  | 5.13765635  | 4.7365482   | 5.79549905  | 6.398381    | 5.8527714   | 5.7564278   |

|            |             |             |             |             |             |             |             |             |
|------------|-------------|-------------|-------------|-------------|-------------|-------------|-------------|-------------|
| "Ccdc85a"  | 2.6546185   | 2.6455665   | 2.512869    | 2.6711631   | 2.69818045  | 2.7203065   | 2.6273544   | 2.69125605  |
| "Ccdc86"   | 7.65509575  | 7.2074876   | 6.3322055   | 6.2482363   | 7.0521067   | 6.65956165  | 6.0789792   | 6.3830502   |
| "Ccdc88a"  | 3.1253963   | 3.0205936   | 3.683668    | 3.0072331   | 3.055641    | 3.0365274   | 3.0419617   | 3.0293972   |
| "Ccdc88c"  | 2.8832438   | 2.8495433   | 2.8127964   | 2.8347206   | 2.8872063   | 2.8703382   | 2.9428253   | 3.0160615   |
| "Ccdc9"    | 4.4328446   | 4.0457716   | 4.0240855   | 3.5043337   | 4.1006827   | 4.3880305   | 4.0732765   | 4.012597    |
| "Ccdc90b"  | 7.4274554   | 7.5028977   | 7.9041233   | 7.970926    | 6.9722986   | 7.225444    | 8.053963    | 7.3432717   |
| "Ccdc91"   | 5.9932235   | 5.8258495   | 6.09475725  | 6.38119005  | 6.0114735   | 5.91580365  | 6.10635625  | 6.16452115  |
| "Ccdc92"   | 2.616209    | 2.860238    | 2.5548885   | 2.5757527   | 2.6139956   | 2.6033306   | 2.1573138   | 2.6118364   |
| "Ccdc93"   | 4.2862607   | 4.4020985   | 4.66343435  | 4.69341     | 4.60128795  | 4.5856587   | 4.66318825  | 4.61414035  |
| "Ccdc96"   | 2.4963205   | 2.4664385   | 2.3763456   | 2.4459023   | 2.4846156   | 2.4766636   | 2.4869418   | 2.4801483   |
| "Ccdc97"   | 3.52821765  | 3.45188975  | 3.23520885  | 3.4345809   | 3.4797666   | 3.63055225  | 3.57671215  | 3.5333079   |
| "Cck"      | 2.3848038   | 2.349323    | 2.3006845   | 2.3279736   | 2.3693194   | 2.3658957   | 2.3710184   | 2.3587618   |
| "Cckar"    | 2.487633    | 2.4585578   | 2.3767285   | 2.4270837   | 2.4831405   | 2.4785483   | 2.4745445   | 2.4738998   |
| "Cckbr"    | 2.4570591   | 2.4229915   | 2.3920512   | 2.4099536   | 2.440824    | 2.4347713   | 2.4447951   | 2.4297812   |
| "Ccl1"     | 2.430176    | 2.4055285   | 2.2709556   | 2.3793888   | 2.4847302   | 2.4291692   | 2.4130254   | 2.4104252   |
| "Ccl11"    | 2.8016496   | 2.7715185   | 2.643367    | 2.7215466   | 2.8009036   | 2.7977152   | 2.782199    | 2.799937    |
| "Ccl17"    | 2.6580052   | 3.500152    | 2.581195    | 2.6028516   | 2.6420794   | 2.633113    | 2.6439376   | 2.627319    |
| "Ccl19"    | 3.761805    | 3.4961689   | 3.4510205   | 3.5164657   | 3.9788356   | 3.3041763   | 3.5186532   | 3.5226192   |
| "Ccl2"     | 4.784382    | 3.2034159   | 5.358729    | 3.9537463   | 3.223072    | 3.2181704   | 3.2302332   | 3.490141    |
| "Ccl21a"   | 2.7843375   | 2.7590287   | 2.8894584   | 2.6506162   | 3.3523238   | 2.9402425   | 2.7676654   | 2.8139958   |
| "Ccl22"    | 2.3183587   | 2.5985143   | 2.2407496   | 2.27759     | 2.3237975   | 2.319891    | 2.314698    | 2.3090048   |
| "Ccl24"    | 6.1491957   | 3.487215    | 6.3628306   | 4.843932    | 4.780629    | 3.5495052   | 5.0634503   | 4.5476446   |
| "Ccl25"    | 3.3430958   | 3.6480472   | 3.7389235   | 4.0106096   | 3.7517912   | 3.8241758   | 4.381156    | 4.2114744   |
| "Ccl27a"   | 5.0078642   | 5.006111667 | 4.762089    | 5.668073733 | 5.2548335   | 5.451096167 | 5.5774192   | 5.688275667 |
| "Ccl28"    | 2.37746225  | 2.48558415  | 2.2744846   | 2.33924045  | 2.37735725  | 2.3687398   | 2.3564211   | 2.36394085  |
| "Ccl5"     | 6.8431334   | 4.6542864   | 7.6905255   | 6.3747993   | 6.3621845   | 5.72449     | 6.480712    | 6.205556    |
| "Ccl6"     | 11.85934075 | 9.8599415   | 9.5551695   | 8.920704    | 9.866855    | 9.6188735   | 8.4306265   | 8.06415525  |
| "Ccl8"     | 2.8484216   | 2.6303596   | 3.254486    | 2.5142608   | 2.552218    | 2.5433602   | 2.3689914   | 2.3916311   |
| "Ccl9"     | 9.8014735   | 9.200202    | 10.9064825  | 10.039038   | 8.5865165   | 8.62942925  | 9.318182    | 9.4124545   |
| "Ccm2"     | 7.454037167 | 7.332996333 | 7.393117667 | 7.362145367 | 7.337001    | 7.505394    | 7.338775267 | 7.496649767 |
| "Ccna1"    | 2.8426242   | 2.8314512   | 2.69938     | 2.7786174   | 2.8500156   | 2.8278694   | 2.8079038   | 2.8249493   |
| "Ccna2"    | 2.8239114   | 2.786485    | 3.1129095   | 2.7633735   | 2.7926141   | 2.7326071   | 2.8550927   | 2.7524532   |
| "Ccnb1"    | 2.474457    | 2.4433871   | 2.388280167 | 2.4120301   | 2.600438333 | 2.460810833 | 2.461423067 | 2.4498482   |
| "Ccnb1ip1" | 2.3956013   | 2.362608    | 2.331016    | 2.325798    | 2.3838446   | 2.3780956   | 2.3819392   | 2.3717604   |
| "Ccnb2"    | 2.470188    | 2.1310806   | 2.3035383   | 2.2449098   | 2.5757153   | 2.1178987   | 2.7462456   | 2.3465      |
| "Ccnb3"    | 2.3965104   | 2.366943    | 2.2990482   | 2.3357153   | 2.3910553   | 2.383482    | 2.386543    | 2.3768222   |
| "Ccnc"     | 5.117200333 | 5.013834    | 5.1190214   | 5.053452633 | 5.1019359   | 5.1854892   | 5.378700433 | 5.1876064   |
| "Ccnd1"    | 6.881846233 | 6.3427601   | 8.888541    | 8.876894833 | 8.547781667 | 6.203460833 | 9.909852333 | 9.443262667 |
| "Ccnd2"    | 4.937154729 | 4.102862757 | 5.754825914 | 5.079424343 | 4.632329757 | 3.8656747   | 5.5566723   | 4.948031486 |
| "Ccnd3"    | 5.9150577   | 5.8385897   | 5.881319    | 5.8053303   | 5.77196     | 5.911795    | 5.6773205   | 5.8252864   |
| "Ccndbp1"  | 8.22174     | 7.986921    | 7.90252     | 8.169593    | 8.063305    | 8.353587    | 7.881239    | 8.1037779   |
| "Ccne1"    | 3.8310423   | 3.790283    | 3.712098    | 3.7861314   | 3.8127382   | 3.8051724   | 3.7816396   | 4.979558    |
| "Ccne2"    | 3.9724765   | 3.9336371   | 3.6051764   | 3.8464172   | 4.27186     | 4.414359    | 3.9475741   | 4.0113      |
| "Ccnf"     | 4.408216    | 6.2648544   | 2.8754787   | 4.423952    | 4.498276    | 5.88949     | 4.4597416   | 4.1531534   |
| "Ccng1"    | 7.286871433 | 7.665714333 | 7.5210381   | 7.696022833 | 7.713693433 | 8.0121368   | 7.739860333 | 7.205915333 |
| "Ccng2"    | 7.51768315  | 6.2592259   | 6.1939265   | 6.3474775   | 5.7007246   | 6.7055536   | 5.93228935  | 5.676209    |
| "Ccnh"     | 8.374883233 | 8.2097156   | 8.4486971   | 8.652280433 | 8.2656635   | 8.470209933 | 8.816346    | 8.700170833 |
| "Ccni"     | 10.74571867 | 10.85558567 | 10.18967033 | 10.248914   | 10.08543033 | 10.42182233 | 10.336239   | 10.06203    |
| "Ccni1"    | 4.3613577   | 3.9910128   | 4.2964096   | 4.0949893   | 4.2110987   | 4.716566    | 4.277486    | 4.182479    |
| "Ccni2"    | 3.9151042   | 3.8782861   | 3.8382444   | 3.8591814   | 3.9006684   | 3.8912811   | 3.9038944   | 3.886195    |
| "Ccni3"    | 12.25425    | 9.810988    | 10.001785   | 9.926034    | 9.514848    | 10.299483   | 9.380381    | 9.503882    |
| "Ccni4"    | 6.7370211   | 7.183669867 | 7.008255767 | 7.153773167 | 7.533343333 | 7.712195733 | 7.248915167 | 7.746957467 |
| "Ccni5"    | 2.9024885   | 2.8688893   | 2.9686666   | 2.762854    | 3.0102918   | 2.8782468   | 2.8921995   | 2.8822072   |
| "Ccni6"    | 6.73771855  | 6.6287208   | 6.5346308   | 6.50760385  | 6.46146985  | 6.89738295  | 6.24310805  | 6.56933545  |
| "Ccni7"    | 9.707359    | 9.421554    | 8.75831     | 8.942559    | 9.015504    | 9.177627    | 9.06771     | 8.711645    |
| "Ccni8"    | 3.11096585  | 3.0636922   | 3.11656595  | 3.03726825  | 3.08555815  | 3.1060766   | 2.9208425   | 3.07312815  |
| "Ccni9"    | 2.7890014   | 2.756302833 | 3.6824867   | 2.8737893   | 2.8120884   | 2.7652768   | 2.902076067 | 2.656134833 |
| "Ccni10"   | 3.4340586   | 3.2690943   | 4.275388433 | 3.940343867 | 3.714657133 | 3.7339867   | 3.9605724   | 3.7230238   |
| "Ccni11"   | 2.6483972   | 2.671408    | 2.5760317   | 2.6037054   | 2.6573577   | 2.6875312   | 2.6524882   | 2.7054205   |
| "Ccni12"   | 2.5705536   | 2.5561038   | 2.49239195  | 2.51821495  | 2.72909985  | 2.57317365  | 2.5749266   | 2.5704732   |
| "Ccni13"   | 7.0569935   | 3.743895    | 4.194485    | 3.8044379   | 3.8034086   | 3.8380313   | 3.85422     | 3.8085659   |
| "Ccni14"   | 9.629221    | 8.948273    | 7.519199    | 9.167459    | 9.290054    | 9.163975    | 7.853133    | 8.630044    |
| "Ccni15"   | 10.52853    | 11.258259   | 10.503403   | 11.023385   | 11.227831   | 10.86831    | 10.941833   | 11.306042   |
| "Ccni16"   | 11.870021   | 11.91669633 | 11.410819   | 11.21791533 | 11.74087733 | 11.98931533 | 11.32608133 | 11.45736767 |
| "Ccni17"   | 7.001511717 | 7.265061533 | 7.271220117 | 6.919371033 | 7.22399595  | 7.39976185  | 7.18069085  | 7.175165433 |
| "Ccni18"   | 8.65185246  | 8.51630694  | 8.30665914  | 8.32198976  | 8.64008534  | 8.78128534  | 8.6143322   | 8.47075266  |
| "Ccni19"   | 11.290217   | 11.290767   | 11.385105   | 10.938811   | 11.255963   | 11.394741   | 11.094682   | 11.131707   |
| "Ccni20"   | 11.29249    | 11.513281   | 11.136705   | 11.009656   | 11.4846275  | 11.4775135  | 11.2429325  | 11.319883   |
| "Ccni21"   | 2.753006    | 2.7521353   | 2.666562    | 2.7042408   | 2.8006566   | 2.7933996   | 2.7442887   | 2.815526    |
| "Ccni22"   | 9.375021    | 9.51381375  | 9.6180215   | 9.3156895   | 9.539239    | 9.593022    | 9.5004025   | 9.515312    |
| "Ccni23"   | 6.6535788   | 6.5000129   | 6.4914905   | 6.3811543   | 6.5150955   | 6.55584     | 6.5628946   | 6.57683895  |
| "Ccni24"   | 9.387011    | 9.656804    | 9.579943    | 9.661195    | 9.392319    | 9.429312    | 9.400727    | 9.547123    |
| "Ccni25"   | 2.4952292   | 2.457727    | 2.361244    | 2.4422336   | 2.4809442   | 2.4707773   | 2.4661489   | 2.4672966   |
| "Ccni26"   | 12.81567    | 8.070052    | 10.478146   | 8.478994    | 7.449787    | 8.048093    | 7.0520225   | 6.7778845   |
| "Ccni27"   | 6.530730217 | 6.334877    | 6.731720367 | 6.83781375  | 6.6975062   | 6.625904783 | 6.789648283 | 6.702462583 |
| "Ccni28"   | 2.7123604   | 2.6782715   | 2.6376352   | 2.6614256   | 2.7035031   | 2.6931105   | 2.693037    | 2.7163923   |
| "Ccni29"   | 11.703902   | 10.382539   | 10.032947   | 10.355584   | 10.960785   | 10.691487   | 9.727459    | 8.839099    |
| "Ccni30"   | 12.820815   | 12.687064   | 13.093178   | 13.0349     | 13.182154   | 12.876405   | 13.547598   | 13.048876   |
| "Ccni31"   | 2.4906723   | 2.3701415   | 2.3952222   | 2.3307326   | 2.3934531   | 2.387976    | 2.365262    | 2.3815696   |
| "Ccni32"   | 2.3558624   | 2.3265393   | 3.1556263   | 2.3010411   | 2.345832    | 2.3369439   | 2.347914    | 2.3304157   |
| "Ccni33"   | 8.754384667 | 9.027411833 | 9.432157767 | 9.469181267 | 9.438742067 | 9.0273108   | 9.6836345   | 9.387253233 |

|            |             |             |             |             |             |             |             |             |
|------------|-------------|-------------|-------------|-------------|-------------|-------------|-------------|-------------|
| "Cd2"      | 2.5837317   | 2.5572088   | 3.0715609   | 2.4893746   | 2.5823543   | 2.5757775   | 2.584188    | 2.5780535   |
| "Cd200"    | 2.6350322   | 2.2788177   | 2.9052203   | 2.6023746   | 2.6335466   | 2.6278384   | 2.646729    | 2.619807    |
| "Cd200r1"  | 2.316759    | 2.2092445   | 2.872089    | 2.2533112   | 2.3093834   | 2.2730799   | 2.6200323   | 2.2280684   |
| "Cd207"    | 4.7078238   | 4.7150393   | 4.4172697   | 4.583493    | 6.6637416   | 6.193822    | 4.963558    | 4.366859    |
| "Cd209c"   | 2.5884316   | 2.5668764   | 2.5231283   | 2.5445127   | 2.5890176   | 2.58038     | 2.5774317   | 2.5829892   |
| "Cd209a"   | 2.4816923   | 2.4540899   | 2.4067013   | 2.4336107   | 2.4922469   | 2.4609663   | 2.4500768   | 2.4725277   |
| "Cd209f"   | 3.2070436   | 3.2149413   | 3.2171047   | 3.1782343   | 3.2198977   | 3.182588    | 3.1982207   | 3.3018599   |
| "Cd22"     | 3.7709312   | 3.5919223   | 4.7432675   | 3.9690504   | 3.67902     | 3.616592    | 3.760331    | 3.7403278   |
| "Cd244"    | 2.60137655  | 2.55225435  | 2.58379445  | 2.5421625   | 2.62593435  | 2.59704765  | 2.5650483   | 2.60139285  |
| "Cd247"    | 2.6470728   | 2.602336    | 2.5267752   | 2.584799333 | 2.638531333 | 2.623199267 | 2.6142291   | 2.612848367 |
| "Cd248"    | 2.3074093   | 2.5975044   | 2.3973982   | 2.3994908   | 2.4561248   | 2.446811    | 2.445778    | 2.4443045   |
| "Cd24a"    | 6.2073204   | 4.977144233 | 5.740576133 | 6.392260367 | 5.864276767 | 6.184114533 | 6.015063433 | 4.823228633 |
| "Cd27"     | 2.397716    | 2.3792284   | 2.3250751   | 2.343247    | 2.4250615   | 2.4072106   | 2.3796587   | 2.4379768   |
| "Cd274"    | 4.8842053   | 4.768331    | 6.656352    | 6.0287323   | 4.675418    | 4.3193336   | 5.716411    | 4.9725404   |
| "Cd276"    | 2.9286866   | 2.895374    | 2.8644223   | 2.8544044   | 2.9136548   | 2.903223    | 2.9205918   | 3.29038     |
| "Cd28"     | 5.15602925  | 4.6836603   | 2.45899385  | 2.49079755  | 2.49155375  | 3.1988946   | 2.532462    | 2.46927085  |
| "Cd2ap"    | 6.602209167 | 5.943746333 | 6.378604233 | 5.9340365   | 6.022435533 | 5.903059567 | 6.3112159   | 5.9723249   |
| "Cd2bp2"   | 5.418358167 | 5.842061    | 5.2630109   | 5.185763333 | 5.166118367 | 5.886104367 | 5.067210733 | 5.1042741   |
| "Cd300a"   | 8.262043    | 5.9566207   | 7.90259     | 7.1447573   | 6.8692565   | 7.00823     | 7.131613    | 6.7404876   |
| "Cd300ld"  | 8.362862    | 5.9757614   | 8.143861    | 7.54188     | 7.06388     | 6.3749905   | 7.4707675   | 6.819086    |
| "Cd300lf"  | 8.432809    | 6.8277173   | 7.337627    | 6.0241723   | 6.5850754   | 6.7918053   | 5.395009    | 5.5900593   |
| "Cd302"    | 14.049148   | 13.787274   | 14.067789   | 13.868719   | 13.864757   | 13.902487   | 13.547924   | 13.746752   |
| "Cd320"    | 4.675465    | 4.9167852   | 4.997088    | 4.138772    | 3.9913986   | 4.8873615   | 4.2746687   | 4.504893    |
| "Cd34"     | 2.775651    | 2.576275    | 2.3745549   | 2.2838063   | 2.3385994   | 2.2795753   | 2.3393023   | 2.2787454   |
| "Cd36"     | 8.184570333 | 8.0738639   | 8.926839    | 8.541816667 | 8.686502333 | 8.348534533 | 9.125987533 | 7.632800233 |
| "Cd37"     | 2.0285034   | 2.3324966   | 3.108266    | 2.4891067   | 2.365308    | 2.4617805   | 2.3719146   | 2.3728971   |
| "Cd38"     | 7.8674165   | 5.8030057   | 7.0716915   | 6.11076375  | 5.981505    | 6.2220421   | 6.561344    | 5.6941706   |
| "Cd3d"     | 2.2627695   | 2.236573    | 2.9828427   | 2.2232955   | 2.9016454   | 2.2544663   | 2.7084322   | 2.2462053   |
| "Cd3e"     | 2.3625226   | 2.37696     | 2.369127    | 2.3715198   | 2.5766401   | 2.3801987   | 2.2616956   | 2.469024    |
| "Cd3g"     | 2.8121266   | 2.7573867   | 3.2074723   | 2.9265308   | 2.8126547   | 2.8024924   | 2.9915106   | 3.0243754   |
| "Cd4"      | 2.8326051   | 2.8075132   | 2.7885234   | 2.7374027   | 2.8396864   | 2.835157    | 2.8127954   | 3.0932376   |
| "Cd40"     | 3.07914115  | 3.01923345  | 3.003767    | 3.15129     | 3.0837066   | 3.101608    | 3.08812225  | 3.0676069   |
| "Cd40lg"   | 2.3546517   | 2.3325996   | 2.2516448   | 2.6834612   | 2.341061    | 2.3344607   | 2.3452125   | 2.3463273   |
| "Cd44"     | 7.3823968   | 5.2603841   | 6.25714925  | 5.976088    | 5.86412775  | 5.6595133   | 6.11778475  | 5.6284445   |
| "Cd46"     | 2.7460976   | 2.7163224   | 2.6692016   | 2.6774366   | 3.3160236   | 2.7396128   | 2.7329483   | 2.72303     |
| "Cd47"     | 10.53005933 | 9.923384667 | 10.54372067 | 10.346109   | 9.865741667 | 9.815972    | 9.969873    | 10.07570667 |
| "Cd48"     | 6.6972756   | 5.2522073   | 8.093405    | 7.16848     | 5.323181    | 6.6835036   | 6.589888    | 6.231619    |
| "Cd52"     | 9.476678    | 7.010749    | 10.126722   | 9.1224165   | 8.2020235   | 7.6807346   | 9.032872    | 8.557986    |
| "Cd53"     | 10.0035095  | 7.8209057   | 10.025152   | 9.444863    | 8.601188    | 8.48383     | 9.000825    | 8.4684515   |
| "Cd55"     | 7.424098333 | 5.850238967 | 6.587885267 | 6.473372867 | 6.082710233 | 5.876579133 | 6.6497906   | 6.2447776   |
| "Cd59a"    | 8.0428753   | 8.4347085   | 8.8365225   | 9.4788215   | 9.3623635   | 8.714943    | 9.3633805   | 9.400206    |
| "Cd5l"     | 13.154912   | 11.454498   | 13.424827   | 13.002355   | 12.396786   | 11.601731   | 12.819836   | 12.51797    |
| "Cd68"     | 8.514672    | 6.4259253   | 9.14359     | 8.18768     | 7.6398654   | 6.910721    | 7.8904696   | 7.27887     |
| "Cd72"     | 6.500557    | 4.05628     | 6.7696195   | 5.906724    | 5.0303984   | 4.754467    | 5.701164    | 5.542286    |
| "Cd74"     | 7.5649185   | 6.218192    | 9.160144    | 8.011199    | 7.2376523   | 6.4215665   | 8.185813    | 7.9127407   |
| "Cd79b"    | 3.6568954   | 4.3844323   | 5.8884997   | 5.3713293   | 4.9464326   | 3.9554667   | 5.5691977   | 4.713136    |
| "Cd80"     | 3.470325967 | 2.728286067 | 2.857525767 | 2.696890133 | 2.782748367 | 2.748048533 | 2.693174    | 2.741025467 |
| "Cd81"     | 11.920267   | 12.406505   | 12.462467   | 12.586007   | 12.500606   | 12.356747   | 12.390124   | 12.4243     |
| "Cd82"     | 8.565884    | 8.635475    | 8.876859    | 9.227802    | 8.559201    | 8.050481    | 8.752974    | 9.033386    |
| "Cd83"     | 5.6757174   | 4.0852437   | 7.0064306   | 6.4693675   | 5.0506115   | 4.656747    | 5.588685    | 4.9816666   |
| "Cd84"     | 7.6768947   | 6.3083334   | 7.33006     | 7.2941723   | 7.251934    | 6.5056753   | 6.8718014   | 6.192859    |
| "Cd86"     | 7.13705845  | 4.36672535  | 7.24998115  | 6.22627265  | 5.110158    | 5.11954715  | 6.1031312   | 5.08659745  |
| "Cd8a"     | 2.7859018   | 2.7561283   | 2.658682    | 2.6795235   | 2.7879057   | 2.7871652   | 2.7628276   | 2.7962468   |
| "Cd8b1"    | 2.490632    | 2.465326    | 2.4070265   | 2.43212     | 2.4969525   | 2.495976    | 2.47865     | 2.4918442   |
| "Cd9"      | 11.149068   | 10.269448   | 9.160529    | 7.3665495   | 8.719674    | 9.847227    | 7.689663    | 8.360654    |
| "Cd93"     | 4.8280965   | 4.52193845  | 4.6138681   | 4.18978845  | 4.4001192   | 4.42590865  | 4.46686145  | 4.10501955  |
| "Cd97"     | 9.232149    | 8.017035    | 8.968908    | 8.875357    | 8.601719    | 8.601143    | 8.579123    | 8.364298    |
| "Cd99"     | 4.248541567 | 4.236178667 | 4.508881433 | 4.467897233 | 3.9067941   | 3.8339038   | 3.647915867 | 3.9819788   |
| "Cd99l2"   | 6.1231436   | 6.1872659   | 6.543678    | 6.582209375 | 6.276773725 | 6.1544664   | 6.57881015  | 6.3873359   |
| "Cda"      | 8.111185    | 7.8968387   | 6.6173043   | 5.5370584   | 6.6905284   | 7.1036367   | 6.0458574   | 6.094631    |
| "Cdadc1"   | 6.2191208   | 5.84889928  | 5.64967416  | 5.88719034  | 6.03501938  | 5.67361182  | 6.03636748  | 6.08117288  |
| "Cdc123"   | 9.627639    | 9.841787    | 9.712585    | 9.781944    | 9.952058    | 9.728061    | 9.715987    | 9.632172    |
| "Cdc16"    | 8.335792    | 8.50458     | 8.285742    | 8.360769    | 7.9279666   | 8.152391    | 8.127497    | 7.939849    |
| "Cdc20"    | 3.262084833 | 3.0241894   | 3.370634433 | 3.121764933 | 3.237824467 | 3.183485367 | 3.463414    | 3.182432067 |
| "Cdc23"    | 3.676684    | 4.13091475  | 3.9715942   | 4.0787884   | 3.78582155  | 3.951611    | 4.1568125   | 3.8851862   |
| "Cdc25a"   | 5.35333525  | 4.32817245  | 4.823679    | 3.98845715  | 4.54650025  | 5.0956825   | 4.5863977   | 4.6026604   |
| "Cdc25c"   | 2.541352    | 2.5098813   | 2.4700792   | 2.4953527   | 2.534981    | 2.5254028   | 2.5168238   | 2.521999    |
| "Cdc26"    | 8.422862    | 8.254093    | 8.631346    | 8.341947    | 8.6257715   | 8.50548     | 8.441614    | 8.556404    |
| "Cdc27"    | 2.5155067   | 2.4813757   | 2.4431803   | 2.4630778   | 2.5006843   | 2.498756    | 2.504273    | 2.4962764   |
| "Cdc34"    | 7.7737064   | 8.410346    | 8.282566    | 7.98577     | 8.224025    | 8.102174    | 7.821203    | 7.6410522   |
| "Cdc37"    | 5.40056075  | 5.54972475  | 5.4988441   | 5.51547005  | 5.5597415   | 5.5802255   | 5.4188597   | 5.5815501   |
| "Cdc37l1"  | 6.715035333 | 6.952157833 | 6.401922533 | 6.919075467 | 6.926332133 | 7.219257533 | 6.805093833 | 7.007091333 |
| "Cdc42"    | 8.685061125 | 8.2428193   | 8.4941652   | 8.3278287   | 8.315505375 | 8.067346525 | 8.6002514   | 8.2643421   |
| "Cdc42ep1" | 7.354607    | 7.7760997   | 7.428638    | 7.5938573   | 7.4202466   | 7.6600847   | 7.2996283   | 7.3437595   |
| "Cdc42ep3" | 3.1713664   | 3.21897565  | 3.7120902   | 3.67517825  | 3.45478365  | 3.63901295  | 3.416531    | 3.16729485  |
| "Cdc42ep4" | 6.8118844   | 6.86169825  | 6.8895676   | 6.89120415  | 7.05486375  | 6.9695561   | 6.909301    | 6.878744    |
| "Cdc42ep5" | 4.2655114   | 2.8597828   | 2.84405305  | 3.0150573   | 2.8393936   | 2.92093465  | 2.80417845  | 2.87211515  |
| "Cdc42se1" | 5.6508629   | 5.1986685   | 6.1510248   | 5.69214585  | 5.702807    | 5.65193165  | 5.673591    | 5.43007915  |
| "Cdc42se2" | 7.1343646   | 6.883251    | 7.229273    | 7.02268     | 7.0047975   | 6.7669477   | 6.994815    | 6.6989546   |
| "Cdc45"    | 2.5869179   | 2.5534744   | 2.6987917   | 2.537221    | 2.5731728   | 2.562631    | 2.5528984   | 2.5590575   |
| "Cdc5l"    | 7.348519    | 7.45239185  | 7.30556835  | 7.317988    | 7.5144858   | 7.585075    | 7.0891955   | 7.17903075  |

|             |             |             |             |             |             |             |             |             |
|-------------|-------------|-------------|-------------|-------------|-------------|-------------|-------------|-------------|
| "Cdc6"      | 2.5796633   | 2.5474024   | 2.565465    | 2.5179152   | 2.5701766   | 2.5674534   | 2.5674343   | 2.5691411   |
| "Cdc7"      | 2.6274292   | 2.5988004   | 2.5714207   | 2.5838761   | 2.6248205   | 2.6273577   | 2.6251135   | 2.6240108   |
| "Cdc73"     | 4.673696175 | 4.3681279   | 4.3311056   | 4.251149275 | 4.464969925 | 4.50442815  | 4.466289075 | 4.233202575 |
| "Cdca3"     | 2.7473607   | 2.7138827   | 2.7470713   | 2.6983635   | 2.9968235   | 2.7035928   | 3.2246077   | 2.7176905   |
| "Cdca4"     | 5.5650269   | 5.139086033 | 5.381942833 | 5.353927733 | 5.390371933 | 5.380281733 | 5.477729067 | 5.454784333 |
| "Cdca5"     | 2.5350242   | 2.4736438   | 3.2101934   | 2.4601505   | 2.5197916   | 2.4865818   | 2.5306957   | 2.48983     |
| "Cdca7"     | 3.309389    | 3.6153896   | 3.438624    | 4.0038524   | 3.7212138   | 3.7764006   | 3.528032    | 3.851346    |
| "Cdca7l"    | 2.4190714   | 2.4165592   | 2.5235686   | 2.441782    | 2.429986    | 2.4458308   | 2.451759    | 2.4269676   |
| "Cdcp1"     | 2.4504402   | 3.7904453   | 4.382889    | 2.4065044   | 3.2158053   | 2.5529995   | 2.5202055   | 2.4143188   |
| "Cdh1"      | 7.875402    | 7.5324984   | 9.491956    | 7.7836204   | 7.6735916   | 7.814376    | 9.598237    | 9.319469    |
| "Cdh10"     | 2.6069067   | 2.5753367   | 2.4800575   | 2.5601566   | 2.6008484   | 2.594115    | 2.590684    | 2.5903716   |
| "Cdh11"     | 2.7426488   | 2.7293634   | 2.2738554   | 2.541785    | 2.3192573   | 2.3132288   | 2.2974436   | 2.3319516   |
| "Cdh13"     | 2.8446189   | 2.83496595  | 2.70683135  | 2.78980345  | 2.9160571   | 2.8642427   | 2.8046176   | 2.8742964   |
| "Cdh15"     | 2.7546766   | 2.8032234   | 2.777452    | 2.7917638   | 2.833426    | 2.806587    | 2.82572     | 2.812189    |
| "Cdh2"      | 8.34877565  | 9.0982045   | 8.9843895   | 9.42922325  | 9.233734    | 8.8913135   | 9.944544    | 9.6671965   |
| "Cdh22"     | 2.359202    | 2.328754    | 2.2857451   | 2.4312105   | 2.3540592   | 2.3424592   | 2.348024    | 2.3383675   |
| "Cdh3"      | 2.4355392   | 2.299224    | 2.2288043   | 2.2653027   | 2.3226519   | 2.316299    | 2.317901    | 2.3093758   |
| "Cdh4"      | 2.7916537   | 3.0285469   | 2.64777055  | 2.7252001   | 3.18344135  | 2.80385465  | 2.76082635  | 2.8030733   |
| "Cdh5"      | 5.29315805  | 4.30342825  | 5.2043012   | 4.9622594   | 4.6622641   | 4.63537815  | 5.1560772   | 5.1296756   |
| "Cdh8"      | 2.9565248   | 2.9311347   | 2.8109245   | 2.8636308   | 2.990946    | 2.9616327   | 2.93523     | 2.9730253   |
| "Cdh9"      | 2.725572    | 2.7138925   | 2.630632    | 2.6610503   | 2.7691503   | 2.7447104   | 2.6977072   | 2.7428565   |
| "Cdh1"      | 2.5202656   | 2.5035036   | 2.4674668   | 2.485279    | 2.517446    | 2.514821    | 2.513234    | 2.5093386   |
| "Cdh15"     | 4.8106937   | 5.724498    | 5.182187    | 5.2823925   | 5.3276615   | 5.6522436   | 5.215323    | 5.4453382   |
| "Cdipt"     | 9.7481445   | 9.7428065   | 9.60984     | 9.6054725   | 9.7076255   | 9.749934    | 9.565483    | 9.6012125   |
| "Cdk1"      | 4.6615534   | 3.5814898   | 4.350419    | 3.889364    | 3.9902701   | 4.2841105   | 4.1170435   | 3.8947923   |
| "Cdk11b"    | 7.6686316   | 7.6056356   | 7.410559    | 7.70892     | 7.8279047   | 7.725728    | 7.3665743   | 7.6109114   |
| "Cdk12"     | 3.34987645  | 3.2602278   | 3.59652125  | 3.48748075  | 3.30288995  | 3.3399476   | 3.56459605  | 3.40282     |
| "Cdk14"     | 2.7802652   | 2.634653033 | 2.686678667 | 2.671762667 | 2.670966067 | 2.6465748   | 2.642907767 | 2.633052333 |
| "Cdk16"     | 5.435513    | 5.2639449   | 5.3641544   | 5.325892367 | 5.4775817   | 5.435768733 | 5.114563433 | 5.344195767 |
| "Cdk18"     | 3.9804046   | 5.9529104   | 3.5016277   | 4.654135    | 5.370451    | 5.3257732   | 4.2801957   | 5.0010734   |
| "Cdk2"      | 4.735317    | 4.193801    | 4.0437117   | 4.2157965   | 4.5406103   | 4.405449    | 5.136942    | 5.0834284   |
| "Cdk20"     | 4.113267    | 3.6302664   | 3.5062375   | 3.6323464   | 3.6065404   | 4.4324093   | 3.5687687   | 3.4925952   |
| "Cdk2ap1"   | 9.8629985   | 10.276005   | 9.770973    | 9.568881    | 9.745956667 | 9.954117    | 9.6496      | 9.605369667 |
| "Cdk2ap2"   | 8.246674    | 8.547977    | 8.927341    | 8.630722    | 8.863855    | 8.639584    | 8.480843    | 8.608398    |
| "Cdk4"      | 6.4055431   | 6.766203    | 6.8639619   | 6.667062667 | 6.387347433 | 6.699202833 | 6.666592467 | 6.6750412   |
| "Cdk5"      | 4.34426925  | 4.6427466   | 4.6072899   | 4.79005125  | 4.4767634   | 4.64223465  | 4.63143725  | 4.66182665  |
| "Cdk5r1"    | 2.5043941   | 2.46081365  | 2.42828665  | 2.4594869   | 2.48611015  | 2.4805739   | 2.4745884   | 2.47362365  |
| "Cdk5rap1"  | 6.0677905   | 6.349618    | 6.172964    | 5.9232426   | 7.1956944   | 6.6762996   | 6.5093603   | 7.272546    |
| "Cdk5rap2"  | 2.9933193   | 2.9016218   | 2.9160008   | 2.9397368   | 2.9792888   | 2.9691656   | 4.0160956   | 2.964511    |
| "Cdk5rap3"  | 8.611541    | 9.121551    | 9.4202      | 8.915518    | 9.460718    | 8.827324    | 8.977525    | 9.202073    |
| "Cdk7"      | 4.97464585  | 5.04173355  | 5.15953665  | 4.93631575  | 5.0881192   | 4.77954495  | 5.0571347   | 4.91115405  |
| "Cdk8"      | 9.931302    | 9.593644    | 9.55866     | 9.874477    | 9.727707    | 10.162895   | 9.665488    | 10.380662   |
| "Cdk9"      | 9.815353    | 9.0080805   | 8.786145    | 8.612406    | 8.886893    | 9.30796     | 8.764505    | 8.628746    |
| "Cdkal1"    | 5.0415516   | 5.0168114   | 4.97785     | 4.991124    | 5.1221795   | 5.256282    | 5.032623    | 5.0906625   |
| "Cdkl2"     | 4.6607866   | 5.475242    | 5.899251    | 5.4933767   | 4.4384904   | 4.3936167   | 5.207346    | 5.1268797   |
| "Cdkn1a"    | 9.765074    | 8.41138425  | 4.53517875  | 3.45395365  | 6.19335265  | 8.3917438   | 4.577549    | 2.46023925  |
| "Cdkn1b"    | 6.533241    | 6.03378665  | 6.02714085  | 6.4414722   | 6.37332335  | 6.3467675   | 6.2768865   | 6.2974006   |
| "Cdkn1c"    | 4.8413258   | 4.350738    | 6.3249125   | 4.917386    | 4.771179    | 4.368391    | 5.9242616   | 4.308872    |
| "Cdkn2aipn" | 6.237339    | 6.444938    | 6.2661905   | 5.9606175   | 6.174201    | 6.202543    | 5.864788    | 6.375647    |
| "Cdkn2b"    | 3.2333972   | 2.835181    | 2.7504725   | 2.7752464   | 2.866447    | 2.859654    | 2.8358655   | 2.8567      |
| "Cdkn2c"    | 6.8334594   | 6.5518427   | 7.1135945   | 8.232559    | 7.1620536   | 6.857126    | 6.943847    | 7.2547903   |
| "Cdkn2d"    | 4.9435163   | 4.252462    | 4.233062    | 4.509837    | 4.284902    | 4.3033376   | 4.307274    | 3.7283115   |
| "Cdo1"      | 14.030244   | 14.114397   | 13.746092   | 13.781216   | 13.818811   | 14.013301   | 13.846872   | 13.436249   |
| "Cdr2"      | 2.324617    | 2.356249    | 2.8059192   | 2.6354737   | 2.3957043   | 2.3665648   | 2.37879     | 2.2666175   |
| "Cdr2l"     | 4.1085744   | 4.0146275   | 3.9344487   | 4.0281186   | 4.0553584   | 4.029732    | 4.498109    | 4.317765    |
| "Cdr14"     | 2.8488655   | 2.8564618   | 2.736259    | 2.7541587   | 2.8550344   | 2.8379188   | 2.8379917   | 2.8730938   |
| "Cds2"      | 8.245797    | 7.901302425 | 9.00583835  | 8.708272325 | 7.5043933   | 8.227559575 | 8.262975625 | 8.415075425 |
| "Cdt1"      | 4.685889267 | 4.5358951   | 4.177408033 | 4.0900524   | 4.0696473   | 4.308003767 | 4.072001433 | 4.063728933 |
| "Cdv3"      | 9.1431978   | 9.2284347   | 8.70659625  | 8.871029    | 9.0366995   | 9.16769     | 8.778891    | 8.97645185  |
| "Cdx2"      | 2.51528965  | 2.4809911   | 2.41672765  | 2.4555345   | 2.5140845   | 2.4949147   | 2.4964675   | 2.496218    |
| "Cdx4"      | 2.5199714   | 2.4908452   | 2.621912    | 2.4563546   | 2.521428    | 2.5181851   | 3.121568    | 2.5120685   |
| "Cdy1"      | 4.886475333 | 5.042010667 | 4.6244589   | 4.480534267 | 4.7088222   | 4.830549167 | 4.6986279   | 4.708547867 |
| "Ceacam1"   | 8.54525989  | 9.07679853  | 8.80968269  | 9.02751497  | 9.11172381  | 9.20295613  | 9.13264888  | 8.92827818  |
| "Ceacam10"  | 2.6705544   | 2.65873     | 2.6282713   | 2.6371965   | 2.6860256   | 2.7169442   | 2.6393359   | 2.6634274   |
| "Ceacam11"  | 2.53052805  | 2.5108838   | 2.4163069   | 2.47050435  | 2.5359691   | 2.54418575  | 2.5147455   | 2.5519489   |
| "Ceacam14"  | 2.9750395   | 2.964587    | 2.8103263   | 2.908665    | 3.0147605   | 3.0163267   | 2.9423087   | 3.0388231   |
| "Ceacam2"   | 2.6547596   | 2.6542974   | 2.618391    | 2.6289196   | 2.8034136   | 2.7196422   | 2.5903506   | 2.6509728   |
| "Cebpa"     | 8.797115    | 8.834766    | 8.681076    | 9.566926    | 8.958916    | 8.915258    | 8.987475    | 9.58831     |
| "Cebpb"     | 12.8576145  | 11.13532    | 10.685416   | 10.5692485  | 11.230839   | 11.5491455  | 10.8938305  | 10.4777595  |
| "Cebpd"     | 10.2247305  | 9.483505    | 8.692074    | 7.6589117   | 8.611002    | 9.044526    | 6.6447363   | 6.7348404   |
| "Cebpg"     | 6.873280133 | 6.593824667 | 6.4358757   | 6.6533025   | 6.944290733 | 7.826980767 | 6.589943767 | 6.8348623   |
| "Cebpz"     | 7.14136     | 6.47566405  | 6.1745866   | 6.24045215  | 6.6788435   | 6.67631365  | 6.3006973   | 6.2091561   |
| "Cecr5"     | 2.8331459   | 2.3958414   | 2.6913013   | 2.7955754   | 2.9211714   | 2.819163    | 2.825203    | 2.809933    |
| "Cela1"     | 6.1777096   | 7.7506623   | 7.3363605   | 9.974684    | 7.266859    | 6.8721514   | 9.50247     | 9.406169    |
| "Cela2a"    | 3.4451132   | 2.918722    | 2.7100127   | 2.7136004   | 2.705201    | 2.651209    | 2.4801698   | 2.6455646   |
| "Cela3b"    | 2.617039633 | 2.656953333 | 2.571996467 | 2.5869001   | 2.665837767 | 2.648450467 | 2.6288193   | 2.662252433 |
| "Celf1"     | 6.62959478  | 6.85144196  | 6.74793202  | 6.83429806  | 6.9403982   | 6.90392028  | 6.92897998  | 6.98770356  |
| "Celf2"     | 7.342647333 | 7.556537767 | 7.051616933 | 6.4012001   | 6.904329    | 6.9805813   | 6.793979167 | 6.177028667 |
| "Celf4"     | 2.6727576   | 2.5478477   | 2.476969    | 2.5010211   | 2.5671597   | 2.5657108   | 2.564384    | 2.5595298   |
| "Celsr1"    | 5.0440345   | 4.393504    | 4.3366365   | 3.4174755   | 5.938761    | 3.7466755   | 4.870655    | 3.5113776   |
| "Celsr2"    | 2.47009655  | 2.4591928   | 2.44583675  | 2.4281349   | 2.62480955  | 2.47344975  | 2.46895785  | 2.46850185  |

|           |             |             |             |             |             |             |             |             |
|-----------|-------------|-------------|-------------|-------------|-------------|-------------|-------------|-------------|
| "Cend1"   | 2.9913623   | 2.962804425 | 2.862225125 | 2.871855725 | 3.0087691   | 2.962998025 | 2.920116925 | 3.011254375 |
| "Cenpa"   | 5.2899575   | 4.4819403   | 5.2274733   | 5.7994323   | 5.2689633   | 5.228908    | 6.500381    | 5.9189262   |
| "Cenpb"   | 3.5839677   | 3.5749204   | 3.5195017   | 3.760637    | 3.6100583   | 3.558682    | 3.595455    | 3.3921278   |
| "Cenpc1"  | 3.9592102   | 3.9286895   | 4.509932    | 4.2872753   | 4.1697717   | 4.005572    | 4.9374695   | 4.005874    |
| "Cenpe"   | 2.7106433   | 2.6754093   | 2.6346345   | 2.610647    | 2.7021537   | 2.709323    | 2.6963234   | 2.7099524   |
| "Cenpf"   | 2.316584    | 2.118331    | 2.1032476   | 2.1923666   | 2.1398454   | 2.1353412   | 2.8863907   | 2.0226874   |
| "Cenph"   | 2.6642509   | 2.6366634   | 2.5539026   | 2.5765753   | 2.7142596   | 2.6626315   | 2.6444316   | 2.6651206   |
| "Cenpk"   | 3.180376    | 3.4317622   | 4.0092125   | 3.1322777   | 3.7182457   | 3.19122     | 3.1727934   | 2.8087869   |
| "Cenpm"   | 3.0761757   | 3.2063406   | 3.1787212   | 3.649931    | 3.1388252   | 3.0508454   | 3.1438231   | 3.1244297   |
| "Cenpo"   | 2.74795425  | 2.689906    | 2.8057537   | 2.9205528   | 2.74917825  | 2.7147398   | 2.7708037   | 2.752002    |
| "Cenpq"   | 4.107211    | 4.1051445   | 4.269733    | 4.700563    | 4.1561017   | 4.14881     | 4.462569    | 4.3644595   |
| "Cenpt"   | 3.3328938   | 3.4001107   | 2.5085511   | 2.5432258   | 2.4285972   | 2.5624728   | 2.5408893   | 2.5569868   |
| "Cenpv"   | 6.7915654   | 7.8967643   | 7.0921044   | 7.588263    | 7.571211    | 7.990047    | 7.6261883   | 7.980301    |
| "Cep110"  | 3.8479961   | 3.7625293   | 3.5320262   | 3.47042435  | 3.58543025  | 3.8165147   | 3.4843575   | 3.53095935  |
| "Cep152"  | 3.8578203   | 3.30058     | 3.8296375   | 3.6615644   | 3.554144    | 3.8877964   | 3.5557547   | 3.575444    |
| "Cep250"  | 2.9574628   | 2.9274943   | 2.8831286   | 2.8397214   | 2.976086    | 2.975825    | 2.947697    | 2.9347696   |
| "Cep290"  | 4.0096335   | 3.2264385   | 3.0109339   | 3.0887566   | 3.24177     | 3.2858121   | 3.1369138   | 3.2083292   |
| "Cep350"  | 6.72536665  | 6.9756396   | 6.86851645  | 7.07245685  | 7.10282475  | 7.373663    | 6.77447055  | 7.19451045  |
| "Cep55"   | 2.4031873   | 2.3715577   | 2.36151295  | 2.356442    | 2.400207    | 2.3893094   | 2.48266885  | 2.386094    |
| "Cep571"  | 3.8515429   | 3.9275266   | 3.80651955  | 4.48891185  | 3.96043135  | 4.1918328   | 4.23463965  | 4.3201549   |
| "Cep68"   | 3.906215825 | 3.93444495  | 3.973267775 | 4.060939025 | 3.9062339   | 4.034453025 | 4.063531325 | 4.0488339   |
| "Cep70"   | 4.8378079   | 4.21016655  | 4.2477941   | 4.1180507   | 4.0684046   | 3.87821355  | 4.16260915  | 4.1785009   |
| "Cept1"   | 10.266143   | 10.225245   | 10.864502   | 10.67652    | 10.521019   | 10.523138   | 10.685109   | 10.482533   |
| "Cerk"    | 5.0921917   | 3.5725133   | 4.88383     | 4.4094925   | 4.55534     | 4.1813507   | 3.7922208   | 3.463879    |
| "Ces1c"   | 14.040191   | 13.84417    | 14.260109   | 14.240576   | 14.325797   | 13.972682   | 14.265573   | 14.20139    |
| "Ces1d"   | 11.185652   | 10.50271367 | 10.93772767 | 11.14851967 | 11.57392167 | 10.50648733 | 11.910457   | 11.70055367 |
| "Ces1e"   | 8.024888    | 8.310108    | 8.789368    | 9.289255    | 9.310908    | 8.583558    | 9.77935     | 9.855059    |
| "Ces1f"   | 9.524954    | 10.70853    | 11.539096   | 12.669997   | 11.646001   | 10.752439   | 12.875392   | 12.965833   |
| "Ces1g"   | 11.745021   | 11.092611   | 12.609088   | 12.071915   | 10.990219   | 8.995345    | 11.581099   | 10.3701935  |
| "Ces2a"   | 9.923174    | 10.4613285  | 10.078614   | 9.987563    | 10.181465   | 10.383043   | 10.636068   | 11.8105755  |
| "Ces2c"   | 6.472543    | 9.372322    | 9.146423    | 10.263513   | 7.198348    | 5.6867924   | 8.696259    | 9.25213     |
| "Ces2e"   | 8.597626    | 9.053573    | 9.075587    | 9.342889    | 10.023605   | 8.861706    | 10.351409   | 10.024883   |
| "Ces2g"   | 6.250832    | 6.7891774   | 7.704772    | 7.0796123   | 7.0974164   | 5.4009247   | 7.3265476   | 7.514571    |
| "Ces3a"   | 11.996716   | 13.795525   | 10.941675   | 13.720791   | 12.931271   | 13.922749   | 12.499735   | 14.016659   |
| "Ces4a"   | 2.5981648   | 2.700212    | 2.5366304   | 2.3996613   | 2.5972838   | 2.5736527   | 2.459817    | 3.0919023   |
| "Cetn2"   | 8.538838    | 8.1067895   | 9.233288    | 8.8090787   | 7.56317725  | 7.263108    | 8.4955249   | 8.636266    |
| "Cetn3"   | 8.692765    | 8.532688    | 8.980337    | 8.5675      | 8.389327    | 8.284863    | 8.754788    | 8.688638    |
| "Cfc1"    | 2.3445754   | 2.473853    | 2.2681403   | 2.287146    | 2.3354917   | 2.3501084   | 2.3336272   | 2.316301    |
| "Cfdp1"   | 8.991298    | 8.995611    | 9.389479    | 9.22224     | 8.833011    | 9.0650215   | 9.324767    | 9.258343    |
| "Cfh"     | 12.836692   | 12.136089   | 12.195432   | 12.0942335  | 12.2872275  | 12.693974   | 12.546255   | 12.55055    |
| "Cfhr1"   | 11.050803   | 11.261182   | 11.177273   | 11.742606   | 11.549361   | 11.701095   | 11.854363   | 11.976219   |
| "Cfhr2"   | 8.3716      | 8.7123297   | 8.5560412   | 9.01042885  | 8.999526    | 8.9822112   | 8.9608625   | 9.16616885  |
| "Cfi"     | 13.589138   | 13.712806   | 13.8953905  | 13.860382   | 13.99038    | 14.127309   | 13.790235   | 13.937988   |
| "Cfi1"    | 8.3962615   | 8.2609093   | 8.7989685   | 8.68882965  | 8.25111185  | 7.5954863   | 8.4603195   | 8.61694365  |
| "Cfi2"    | 8.9533845   | 9.1655455   | 8.84289265  | 9.206156    | 9.0111055   | 9.2295895   | 9.234489    | 9.140347    |
| "Cfiar"   | 6.820496975 | 7.115856025 | 7.135559275 | 7.231848225 | 7.612178    | 7.13216835  | 7.121500675 | 7.574073875 |
| "Cfp"     | 10.256405   | 7.6715302   | 9.961326    | 8.789972    | 8.634661    | 8.103494    | 8.730207    | 8.097873    |
| "Cftr"    | 2.87782275  | 2.8480278   | 2.7617667   | 2.80114985  | 2.9065262   | 2.92124575  | 2.8326255   | 2.93880785  |
| "Cggbp1"  | 9.798307    | 10.061987   | 10.243139   | 10.310039   | 10.358362   | 10.499052   | 10.205893   | 10.188465   |
| "Cgni1"   | 4.276336067 | 4.535889733 | 4.6301765   | 4.5670539   | 4.468576433 | 4.253360667 | 4.367905367 | 4.526500767 |
| "Cgref1"  | 2.76429615  | 3.3357178   | 2.7075081   | 2.6844442   | 2.8832186   | 2.98742605  | 2.79265665  | 3.042452    |
| "Chac1"   | 8.963329    | 7.002385    | 6.502994    | 5.7824645   | 6.7849355   | 8.11891     | 6.7923      | 6.938821    |
| "Chac2"   | 7.422452    | 8.071201    | 8.803506    | 9.293979    | 8.205192    | 8.872642    | 9.725906    | 9.429677    |
| "Chad"    | 2.4839787   | 2.4526844   | 2.392746    | 2.4146438   | 2.4733639   | 2.4726458   | 2.471219    | 2.4734678   |
| "Chaf1b"  | 4.027376    | 3.4096048   | 3.1995583   | 3.266516    | 3.2317376   | 3.3200796   | 3.2947721   | 3.368785    |
| "Chchd1"  | 9.582384    | 10.1104765  | 9.965974    | 10.187642   | 9.860847    | 10.057284   | 10.218865   | 10.229597   |
| "Chchd10" | 13.2055845  | 13.8343435  | 13.223893   | 13.574016   | 13.8628845  | 14.012137   | 13.700049   | 13.7588285  |
| "Chchd2"  | 14.431212   | 14.540302   | 14.122021   | 14.372935   | 14.42157    | 14.495063   | 14.758226   | 14.47588    |
| "Chchd3"  | 7.73713875  | 8.0731123   | 7.7601463   | 7.85593865  | 7.4879465   | 7.53415     | 7.786681    | 7.8921275   |
| "Chchd4"  | 8.026243    | 8.24438     | 7.536561    | 7.656178    | 7.8740606   | 8.271835    | 7.432843    | 7.738034    |
| "Chchd5"  | 5.8314771   | 6.0540238   | 4.9871502   | 5.56485545  | 5.6020571   | 5.6131518   | 5.495036    | 5.3054499   |
| "Chchd6"  | 4.8916998   | 5.18474795  | 5.426948    | 4.47559805  | 5.41839615  | 4.26349625  | 5.3054383   | 4.90108105  |
| "Chchd7"  | 7.8294997   | 8.603372    | 7.706783    | 7.771818    | 8.291959    | 8.351461    | 7.9002905   | 7.929312    |
| "Chd1"    | 6.2292219   | 5.1035927   | 4.6929799   | 4.664840867 | 4.764982567 | 4.977807667 | 4.578688    | 4.5765038   |
| "Chd1l"   | 6.0566807   | 7.6120696   | 7.0860476   | 7.0073004   | 7.047405    | 6.3383365   | 6.682176    | 6.699133    |
| "Chd4"    | 7.9247259   | 7.822151133 | 7.495542967 | 7.284125667 | 7.7723515   | 7.660553    | 7.477228633 | 7.703647667 |
| "Chd6"    | 5.1077533   | 5.568744    | 5.639485    | 5.626887    | 5.6049867   | 5.289135    | 5.87553     | 5.846675    |
| "Chd7"    | 4.872711    | 5.6894283   | 5.1497855   | 5.197449    | 4.925533    | 5.457359    | 5.2569394   | 5.197458    |
| "Chd8"    | 7.0976763   | 7.0365486   | 7.2599144   | 7.0801597   | 7.3329487   | 7.0426226   | 7.0697966   | 7.1314445   |
| "Chdh"    | 10.367243   | 11.007526   | 11.375678   | 11.514995   | 11.396036   | 10.786403   | 11.216847   | 11.523078   |
| "Chek1"   | 3.294758725 | 2.5524647   | 2.478930225 | 2.508790325 | 2.577159375 | 2.57434285  | 2.55830175  | 2.574787275 |
| "Chek2"   | 3.2512372   | 2.71515     | 3.308751    | 3.952497    | 2.8252993   | 3.229549    | 3.2499022   | 3.803494    |
| "Cherp"   | 6.38670285  | 6.3357418   | 6.2268164   | 6.31068085  | 6.3206733   | 6.35145575  | 6.2496095   | 6.0182068   |
| "Chfr"    | 8.1597988   | 8.0506355   | 7.790648    | 8.14270515  | 7.98970975  | 8.1187715   | 8.2148998   | 8.1403945   |
| "Chi311"  | 6.616273    | 3.8393857   | 6.995216    | 3.4689004   | 3.58162     | 3.5613012   | 3.5885868   | 3.5713418   |
| "Chi313"  | 8.7315215   | 5.84644605  | 8.5668377   | 5.1243403   | 4.1468293   | 7.427148    | 3.60458465  | 3.2243824   |
| "Chi314"  | 3.1254954   | 3.0971122   | 3.0477197   | 3.0705576   | 3.1171117   | 3.1082864   | 3.1134586   | 3.1146662   |
| "Chic1"   | 2.1642103   | 2.124307    | 2.1973581   | 2.1172218   | 2.15345     | 2.0658135   | 3.151894    | 2.131937    |
| "Chic2"   | 10.892118   | 9.678998    | 9.305343    | 9.617281    | 9.1466465   | 10.092197   | 9.397767    | 9.607008    |
| "Chid1"   | 5.7547543   | 5.8803985   | 6.2361273   | 6.301214    | 5.778588    | 5.72011685  | 5.9228927   | 6.34115645  |
| "Chka"    | 7.9740906   | 4.223407    | 6.348713    | 4.3664293   | 4.1086845   | 6.337225    | 5.9411316   | 4.200737    |

|           |             |             |             |             |             |             |             |             |
|-----------|-------------|-------------|-------------|-------------|-------------|-------------|-------------|-------------|
| "Chkb"    | 8.899032    | 9.391806    | 8.66466     | 8.634846    | 9.1250305   | 9.281827    | 9.000228    | 8.80366     |
| "Chl1"    | 2.4210277   | 2.3996673   | 2.327512    | 2.3583632   | 2.418469    | 2.4409065   | 2.409844    | 2.4087944   |
| "Chm"     | 6.5686483   | 6.8525867   | 6.9488916   | 6.7135086   | 6.717535    | 6.632086    | 6.889234    | 6.7620354   |
| "Chmp1a"  | 8.678083    | 9.166073    | 9.010957    | 8.932548    | 8.799589    | 9.081114    | 9.099394    | 8.574042    |
| "Chmp1b"  | 8.9275385   | 8.885072    | 8.5217885   | 8.465725    | 8.6078645   | 8.911215    | 8.7536445   | 8.376925    |
| "Chmp2a"  | 10.32223    | 10.566117   | 10.703957   | 10.672567   | 10.620094   | 10.529364   | 10.849739   | 10.734811   |
| "Chmp3"   | 6.61889145  | 6.4151298   | 6.86260015  | 6.725083    | 6.5521585   | 6.51275185  | 7.0438795   | 6.83514685  |
| "Chmp4b"  | 9.6965845   | 9.609672    | 9.7348515   | 9.5801265   | 9.385996    | 9.13674     | 9.337858    | 9.36441885  |
| "Chmp4c"  | 3.03247825  | 3.02521925  | 2.9196473   | 2.9318756   | 3.06509745  | 3.06537725  | 3.01787325  | 3.0782542   |
| "Chmp5"   | 10.92083    | 10.736612   | 11.120368   | 11.167473   | 10.834028   | 10.800426   | 11.109884   | 11.009802   |
| "Chmp6"   | 6.6112785   | 6.6929665   | 6.821166    | 6.5113463   | 6.452493    | 6.7084627   | 6.7425704   | 6.447457    |
| "Chmp7"   | 7.718449    | 7.9085865   | 7.9034405   | 7.6259747   | 7.576906    | 7.7149806   | 7.522867    | 8.05361     |
| "Chn1"    | 2.390828    | 2.3606148   | 2.2938406   | 2.324924    | 2.3855822   | 2.3800998   | 2.3816018   | 2.436294    |
| "Chn2"    | 6.4547332   | 6.8808422   | 6.79948475  | 7.434056    | 6.85307195  | 6.423821    | 7.686029    | 7.6583308   |
| "Chod1"   | 2.8839052   | 2.8567793   | 2.780105    | 2.7948427   | 2.9102106   | 2.9032466   | 2.8398547   | 2.9145827   |
| "Chordc1" | 8.316736    | 8.291815    | 9.2740135   | 8.889244    | 9.38353     | 10.005549   | 9.305756    | 9.422928    |
| "Chpf2"   | 6.2893276   | 6.4063635   | 5.6074495   | 5.0566955   | 5.319733    | 5.0455575   | 4.9693995   | 4.7351356   |
| "Chpt1"   | 9.16239975  | 10.32569425 | 8.134514875 | 9.1951105   | 9.832728875 | 9.8470275   | 9.36746225  | 9.13151475  |
| "Chrac1"  | 8.354964    | 8.246166    | 7.9495425   | 7.9945345   | 7.786163    | 8.056758    | 7.911247    | 7.869921    |
| "Chrd"    | 2.4781787   | 2.3969088   | 2.4035227   | 2.4652047   | 2.4105344   | 2.4545321   | 2.4679182   | 2.4941385   |
| "Chrd11"  | 2.651381    | 2.618962    | 2.5457902   | 2.5708294   | 2.6552446   | 2.653695    | 2.6282268   | 2.6491022   |
| "Chrd12"  | 2.272968    | 2.5521019   | 2.204072    | 2.1940465   | 2.2640114   | 2.289145    | 2.2044868   | 2.2492971   |
| "Chrm1"   | 2.3906364   | 2.3662212   | 2.3339155   | 2.3512487   | 2.3849978   | 2.3759627   | 2.378979    | 2.3711479   |
| "Chrm3"   | 2.3848553   | 2.3414009   | 2.333293    | 2.323118    | 2.3710237   | 2.3704584   | 2.3608549   | 2.370956    |
| "Chrna3"  | 2.4881248   | 2.4608319   | 2.4141054   | 2.4324806   | 2.5757275   | 2.4645681   | 2.4792397   | 2.4656038   |
| "Chrna6"  | 2.44626805  | 2.4272715   | 2.34719585  | 2.3761625   | 2.46188695  | 2.4258932   | 2.43149975  | 2.42502785  |
| "Chrnb4"  | 2.3886976   | 2.3687034   | 2.304131    | 2.3470619   | 2.3901463   | 2.3954406   | 2.3731976   | 2.452893    |
| "Chst1"   | 2.5276928   | 2.5066442   | 2.36408     | 2.5132117   | 2.5619466   | 2.5152278   | 2.5280743   | 2.5115972   |
| "Chst11"  | 3.1619655   | 3.0837356   | 2.97227255  | 3.014185    | 3.1272097   | 3.11747345  | 3.09384965  | 3.12596325  |
| "Chst12"  | 2.2120094   | 2.1760573   | 2.1348662   | 2.1681693   | 2.3772635   | 2.1884465   | 2.2000134   | 2.1827788   |
| "Chst14"  | 3.2043533   | 2.8517594   | 4.240674    | 4.014026    | 3.0569303   | 2.862461    | 4.1596975   | 2.9485688   |
| "Chst15"  | 6.830039    | 6.53726145  | 6.189421    | 5.9178867   | 6.7535152   | 6.8266282   | 6.56434165  | 5.8244464   |
| "Chst2"   | 3.3011978   | 3.4208467   | 3.5540214   | 3.294416    | 3.2071714   | 3.251824    | 3.5623288   | 3.3003256   |
| "Chst3"   | 2.49794     | 2.4644141   | 2.409712    | 2.4477942   | 2.4966798   | 2.4776587   | 2.4760246   | 2.493753    |
| "Chst4"   | 2.5654936   | 2.5330272   | 2.5193422   | 2.5282416   | 2.6532412   | 2.5535002   | 2.5548966   | 2.5492558   |
| "Chst5"   | 2.5292275   | 2.5014944   | 2.4374168   | 2.4655318   | 2.5226116   | 2.5198083   | 2.5286179   | 2.514502    |
| "Chst7"   | 2.8267643   | 2.7983904   | 2.8141632   | 2.833269    | 2.901702    | 2.8149521   | 3.1142068   | 3.2944698   |
| "Chtf8"   | 7.2061768   | 7.2077417   | 7.1844616   | 7.121657    | 7.235877    | 7.4526176   | 7.3114      | 7.2282925   |
| "Chuk"    | 8.779113    | 9.1228661   | 8.694576    | 9.1017735   | 9.1731485   | 9.3421685   | 9.5299795   | 9.4067615   |
| "Churc1"  | 9.334566    | 9.7561455   | 9.479229    | 9.382902    | 9.3678055   | 9.329448    | 9.508661    | 9.512152    |
| "Ciao1"   | 8.843719    | 9.212905    | 8.686853    | 9.041839    | 8.905557    | 9.069996    | 8.822258    | 9.089759    |
| "Ciapin1" | 6.9870605   | 7.1178082   | 5.9090187   | 6.1515183   | 6.737616    | 5.9721398   | 6.11944085  | 6.5554425   |
| "Cib1"    | 10.023261   | 10.093389   | 10.106977   | 9.753347    | 9.788563    | 10.008973   | 9.7983675   | 9.694506    |
| "Cib2"    | 3.0563996   | 2.8922505   | 2.9120247   | 2.9412034   | 3.6977448   | 2.2051575   | 3.9019358   | 2.9502828   |
| "Cic"     | 5.4195137   | 5.106313    | 5.5145955   | 5.0769544   | 4.6468635   | 5.3735957   | 4.713549    | 5.1229377   |
| "Cideb"   | 9.621048    | 10.218132   | 10.121899   | 10.498145   | 10.342847   | 10.241647   | 10.48046    | 10.490151   |
| "Cidec"   | 2.5826087   | 6.3566127   | 2.4848716   | 2.5721169   | 2.7072427   | 3.131802    | 2.5809913   | 2.635745    |
| "Ciita"   | 2.232205    | 2.2217524   | 2.4138472   | 2.1801271   | 2.2244546   | 2.2162786   | 2.2256925   | 2.2091734   |
| "Cinp"    | 6.8832474   | 6.412918    | 6.3654423   | 6.638594    | 6.392736    | 6.363922    | 7.0393934   | 6.615995    |
| "Cirr1"   | 6.349542    | 6.78896     | 5.8344584   | 6.8259444   | 6.476698    | 6.5807776   | 6.435434    | 6.6885138   |
| "Cirbp"   | 7.944811    | 8.745747    | 6.6041856   | 6.5300593   | 7.3328476   | 6.487558    | 6.4579263   | 6.0789547   |
| "Cirh1a"  | 8.531712    | 7.3939147   | 6.541754    | 6.6102      | 7.5366592   | 7.7710285   | 6.881057    | 7.3264246   |
| "Cisd1"   | 12.106675   | 12.3110405  | 11.66086175 | 12.2301405  | 12.039051   | 12.3129475  | 12.20461975 | 12.20279325 |
| "Cish"    | 7.607642    | 8.368059    | 7.468855    | 7.4227033   | 7.3209286   | 7.596819    | 4.8059216   | 8.263372    |
| "Cit"     | 2.3995563   | 2.3670359   | 2.3156557   | 2.3439541   | 2.4204543   | 2.4147105   | 2.3913008   | 2.38615295  |
| "Cited2"  | 6.0965465   | 5.22185875  | 5.6278207   | 5.9661171   | 5.5145515   | 5.0700707   | 5.8405309   | 5.6480656   |
| "Ciz1"    | 5.334064    | 5.4040775   | 5.5544267   | 5.9536557   | 5.59989     | 5.7227507   | 5.5122      | 5.4854035   |
| "Ckap2"   | 3.2516778   | 3.2136033   | 3.1767888   | 3.0080528   | 3.2999666   | 3.2300699   | 3.6620045   | 3.2272239   |
| "Ckap4"   | 3.585183025 | 2.941744625 | 3.87895935  | 3.42330215  | 3.205231    | 3.023009375 | 3.5184655   | 3.3697647   |
| "Ckap5"   | 3.6202471   | 3.7022839   | 3.8418777   | 3.746486    | 3.7625673   | 4.2132897   | 4.2615957   | 3.2572262   |
| "Ckb"     | 6.338838    | 4.413698    | 7.6270027   | 7.0470243   | 5.984962    | 4.7802467   | 7.116707    | 6.2469077   |
| "Cklf"    | 3.786907543 | 3.191874543 | 4.058419071 | 3.621832486 | 3.555793057 | 3.574170271 | 3.749582671 | 3.545378929 |
| "Ckmt1"   | 2.737346    | 2.7101657   | 2.6298547   | 2.6644552   | 2.7367098   | 2.7700675   | 2.6132302   | 2.774436    |
| "Ckmt2"   | 2.468824    | 2.4406717   | 2.3735445   | 2.40534     | 2.4679585   | 2.4593468   | 2.4610872   | 2.4620507   |
| "Cks1b"   | 6.3941635   | 7.62193725  | 7.90303085  | 7.730913    | 7.6825893   | 6.0693524   | 7.2691795   | 8.34489535  |
| "Cks2"    | 9.0086895   | 8.813887    | 9.6168435   | 9.6486385   | 9.088369    | 8.7457485   | 9.636315    | 9.462832    |
| "Clasp1"  | 5.7893335   | 5.3021871   | 5.2977165   | 5.3119817   | 5.23581685  | 5.2455803   | 5.18389325  | 5.5046329   |
| "Clasp2"  | 4.95941165  | 4.4576682   | 4.71100845  | 4.8151642   | 4.71365395  | 4.6574696   | 4.8838367   | 4.74403485  |
| "Clasrp"  | 5.571774    | 5.686029    | 5.3645563   | 5.621454    | 5.5809975   | 5.487083    | 5.185443    | 5.368054    |
| "Clca1"   | 7.530705667 | 5.961821367 | 6.9544978   | 6.241681167 | 6.429137267 | 7.299525933 | 6.262786467 | 5.6730258   |
| "Clca2"   | 2.876033    | 2.8554552   | 2.7583625   | 2.8061423   | 2.8928256   | 2.8916779   | 2.8488915   | 2.884238    |
| "Clca3"   | 2.5488765   | 2.5319667   | 2.4493058   | 2.474462    | 2.548112    | 2.5623636   | 2.5127842   | 2.5603538   |
| "Clca4"   | 2.5962002   | 2.566865    | 2.4848802   | 2.5209723   | 2.5976868   | 2.5890763   | 2.5873382   | 2.5920484   |
| "Clcc1"   | 6.51291332  | 6.7650846   | 6.46470634  | 6.6853859   | 6.69136344  | 6.76180086  | 6.82652212  | 6.6599533   |
| "Clcf1"   | 5.12130595  | 3.6901452   | 3.4610113   | 3.51631665  | 3.68985835  | 3.7463404   | 3.605003    | 3.64859995  |
| "Clcn1"   | 2.9481485   | 2.9464798   | 2.8125896   | 2.928481    | 2.966248    | 2.956292    | 2.8570173   | 3.0413625   |
| "Clcn2"   | 5.022284    | 5.2260695   | 5.3557796   | 6.566486    | 5.452838    | 5.524925    | 5.9900775   | 6.3093085   |
| "Clcn3"   | 7.5529107   | 7.5544625   | 7.503129125 | 7.405037    | 7.6924136   | 7.7381416   | 7.65764595  | 7.606463675 |
| "Clcn4-2" | 8.80535575  | 8.7360575   | 8.8209065   | 8.7809185   | 8.910171    | 8.8362465   | 8.7692025   | 8.9248485   |
| "Clcn5"   | 3.8752885   | 3.79562075  | 4.3150341   | 3.7790945   | 3.7640978   | 4.0409715   | 3.86670435  | 3.84596225  |
| "Clcn7"   | 2.7712452   | 2.7436008   | 2.727594    | 2.7414322   | 2.757514    | 2.7505157   | 2.7632334   | 2.7452      |

|           |             |             |             |             |             |             |             |             |
|-----------|-------------|-------------|-------------|-------------|-------------|-------------|-------------|-------------|
| "Cldn1"   | 6.1757526   | 5.1097536   | 7.3039213   | 5.68529175  | 4.7559173   | 5.84460065  | 6.83125045  | 5.8729632   |
| "Cldn11"  | 2.5651102   | 2.5432136   | 2.4690137   | 2.4999623   | 2.5654197   | 2.6037507   | 2.5587375   | 2.558716    |
| "Cldn14"  | 7.1754065   | 4.658113    | 5.8301153   | 4.9221582   | 4.466076    | 5.8921556   | 5.6959224   | 5.1903205   |
| "Cldn15"  | 3.0783563   | 3.0621066   | 2.9670086   | 3.0019279   | 3.1879911   | 3.052874    | 3.0509892   | 3.0590234   |
| "Cldn18"  | 2.5628824   | 2.533905    | 2.4441013   | 2.492714    | 2.5613358   | 2.6879592   | 2.561346    | 2.5556753   |
| "Cldn2"   | 5.62336585  | 5.73933635  | 6.63647885  | 6.28028955  | 5.71359775  | 5.36397385  | 6.4556828   | 5.7415819   |
| "Cldn23"  | 2.3879447   | 2.365955    | 2.3001642   | 2.3459654   | 2.3877683   | 2.377647    | 2.3748465   | 2.3726006   |
| "Cldn25"  | 6.058847833 | 5.892192333 | 5.681114267 | 5.8270627   | 5.817631367 | 5.8953041   | 5.8159374   | 5.707127567 |
| "Cldn3"   | 6.90683405  | 7.037028825 | 7.892126575 | 7.416868575 | 6.818080575 | 7.048384375 | 7.40551625  | 7.34194435  |
| "Cldn5"   | 5.960373    | 5.691174    | 5.9977674   | 6.161747    | 5.718937    | 5.721407    | 7.4142957   | 6.414148    |
| "Clec10a" | 2.4283562   | 2.3950896   | 2.443104    | 2.9738781   | 2.4126906   | 2.406187    | 2.473977    | 2.399371    |
| "Clec11a" | 2.668425    | 3.4825265   | 2.8458104   | 2.9331279   | 3.4648294   | 2.9912589   | 3.0024824   | 2.9579203   |
| "Clec14a" | 6.207047    | 5.74483175  | 5.95618065  | 6.4320257   | 6.722399    | 6.83962585  | 6.72454185  | 6.50713445  |
| "Clec16a" | 3.496776    | 3.4385858   | 3.3877869   | 3.4342358   | 3.4811962   | 3.4737604   | 3.488325    | 3.467928    |
| "Clec1b"  | 9.525567    | 9.075337    | 9.982956    | 9.687772    | 9.398573    | 9.461842    | 9.508648    | 9.008409    |
| "Clec2d"  | 6.7078705   | 9.775436    | 10.142262   | 10.321582   | 9.797207    | 9.441436    | 9.444422    | 10.195624   |
| "Clec2g"  | 2.6211686   | 2.607924    | 2.5258322   | 2.5891614   | 2.6363847   | 2.6184368   | 2.6023471   | 2.613843    |
| "Clec2h"  | 2.780979833 | 3.037228833 | 2.6752812   | 2.735768433 | 2.807257567 | 2.789438167 | 2.7189003   | 2.787093833 |
| "Clec2i"  | 2.7093272   | 2.6861954   | 2.647131    | 2.623361    | 2.7251692   | 2.808428    | 2.6873841   | 2.7078605   |
| "Clec3b"  | 2.3823686   | 2.3486266   | 2.3096204   | 2.3160741   | 2.3784437   | 2.378722    | 2.3705993   | 2.367639    |
| "Clec4a2" | 5.376991067 | 4.024286267 | 6.222867067 | 5.204557567 | 4.54468     | 4.833261233 | 4.702058833 | 4.574775167 |
| "Clec4b1" | 3.4079545   | 3.4580495   | 4.1648602   | 3.8132398   | 3.4802613   | 3.7324145   | 3.7321627   | 3.7667031   |
| "Clec4d"  | 5.223901    | 2.6889987   | 3.4992683   | 2.3674467   | 2.4001985   | 2.9207327   | 2.406406    | 2.3949308   |
| "Clec4e"  | 2.817808    | 2.3182954   | 2.5337509   | 2.30387475  | 2.33737485  | 2.3343007   | 2.31936385  | 2.3273885   |
| "Clec4f"  | 11.365528   | 9.264029    | 11.282477   | 10.817734   | 10.191816   | 10.03603    | 10.617023   | 10.228689   |
| "Clec4g"  | 11.530357   | 9.887697    | 10.737738   | 10.936536   | 10.626991   | 10.905932   | 11.294157   | 10.960712   |
| "Clec4n"  | 8.2241385   | 5.03557185  | 8.06350425  | 6.630015    | 6.10226765  | 5.527215    | 6.490617    | 5.9235538   |
| "Clec7a"  | 9.411692    | 6.9409246   | 9.931968    | 9.025981    | 8.695191    | 7.7545547   | 8.623932    | 8.629317    |
| "Clgn"    | 2.79499785  | 2.7699915   | 2.65261715  | 2.7242218   | 2.818933    | 2.848817    | 2.7680849   | 2.82172645  |
| "Clc1"    | 8.025799    | 6.2867107   | 8.274468    | 7.5224977   | 7.087597    | 6.9450397   | 7.447685    | 7.156052    |
| "Clc3"    | 2.4003775   | 2.3717427   | 2.3709536   | 2.3864844   | 2.4102826   | 2.4046671   | 2.8782425   | 2.5120645   |
| "Clc4"    | 9.0036338   | 7.427172233 | 7.778184567 | 7.430357    | 6.79092333  | 7.776347    | 7.722726667 | 7.5715321   |
| "Clint1"  | 10.758649   | 10.701901   | 10.263057   | 10.088848   | 10.668836   | 10.571682   | 10.501703   | 10.310301   |
| "Clip1"   | 7.1244918   | 6.359080467 | 5.920615233 | 5.972717667 | 6.0596745   | 6.441527833 | 5.8372882   | 6.126434333 |
| "Clip2"   | 2.3975728   | 2.3599591   | 2.3136647   | 2.3384893   | 2.3811996   | 2.3763041   | 2.38133     | 2.3694148   |
| "Clip4"   | 2.60615795  | 2.61188735  | 2.450499825 | 2.60221325  | 2.617334175 | 2.660205375 | 2.6081774   | 2.6348346   |
| "Clk1"    | 9.811202    | 10.443275   | 10.42085    | 10.418458   | 10.5248785  | 10.92054    | 10.147948   | 10.316915   |
| "Clk2"    | 6.152605    | 6.700464    | 6.3258557   | 6.5282445   | 6.8195367   | 7.2053747   | 6.8853254   | 6.7337565   |
| "Clk3"    | 7.241506    | 7.008194    | 6.5316515   | 7.1387706   | 7.2655926   | 7.705724    | 7.4443974   | 7.518479    |
| "Clk4"    | 7.5199017   | 7.567343    | 6.71517875  | 7.0055455   | 7.525162    | 7.6678204   | 7.0185595   | 7.5749785   |
| "Clmn"    | 6.8001122   | 7.201395    | 6.1050014   | 7.3939233   | 6.432524    | 7.368257    | 6.848883    | 7.0116997   |
| "Cln3"    | 3.3294885   | 3.4777882   | 4.201996    | 3.5441835   | 3.5728745   | 3.8055964   | 3.7263253   | 3.5599186   |
| "Cln5"    | 9.042107    | 8.759903    | 8.909481    | 8.849543    | 8.6875725   | 9.149986    | 8.687135    | 8.862085    |
| "Cln6"    | 3.7964041   | 3.7587206   | 3.7188783   | 3.8737648   | 3.778756    | 4.3503113   | 3.787101    | 3.7638786   |
| "Cln8"    | 8.5700128   | 6.504804667 | 6.0978315   | 6.004809933 | 6.737173467 | 7.3590365   | 6.1834179   | 6.1583552   |
| "Clns1a"  | 8.6673665   | 8.859730533 | 8.481271667 | 8.751596667 | 8.532931767 | 8.600814233 | 8.5148182   | 8.631287467 |
| "Clock"   | 7.41883     | 7.6089305   | 6.8146775   | 6.8912123   | 7.085587    | 7.88422325  | 7.48019715  | 6.5227825   |
| "Clp1"    | 6.0506687   | 6.9198813   | 6.7852674   | 6.467056    | 6.987767    | 6.8672705   | 6.4110556   | 6.8391476   |
| "Clpb"    | 4.16436995  | 4.4341413   | 4.2635955   | 4.5132228   | 4.58929735  | 4.19219275  | 4.7521852   | 4.52629235  |
| "Clpp"    | 9.403861    | 9.8044465   | 9.21397     | 9.07198     | 9.3056005   | 9.6889005   | 9.19478325  | 9.2195085   |
| "Clps"    | 2.6055849   | 2.5797884   | 2.482931    | 2.5240622   | 2.6224968   | 2.6036322   | 2.5735154   | 2.5957716   |
| "Clptm1"  | 6.880241    | 7.376999    | 7.2649446   | 7.1764193   | 7.116082    | 7.4372096   | 7.055531    | 7.285948    |
| "Clptm11" | 10.603762   | 10.789727   | 11.215565   | 11.084479   | 11.117773   | 10.735556   | 11.006193   | 10.846243   |
| "Clpx"    | 11.653244   | 9.975812    | 10.451617   | 9.432284    | 9.719794    | 10.748517   | 11.132658   | 9.154291    |
| "Clrn3"   | 2.5523376   | 2.5693302   | 2.472753    | 2.5279508   | 2.560636    | 2.550046    | 2.540049    | 2.5827913   |
| "Clstrn1" | 2.9686894   | 3.08231     | 3.1379495   | 3.3255126   | 3.23174     | 3.092678    | 3.8022878   | 3.0895402   |
| "Clta"    | 11.262593   | 11.0087665  | 10.8568455  | 10.8448215  | 10.65468825 | 11.0184775  | 10.6255     | 10.711786   |
| "Cltb"    | 6.255526    | 6.59180285  | 6.2566116   | 6.0513615   | 6.24092     | 6.4824473   | 5.72052955  | 5.809972    |
| "Cltc"    | 11.809219   | 11.849977   | 12.307899   | 11.694357   | 11.96515    | 11.789602   | 12.016124   | 11.875126   |
| "Clu"     | 13.82319625 | 13.844826   | 13.672      | 13.820112   | 13.68697738 | 13.97901525 | 13.489174   | 13.89542075 |
| "Cluap1"  | 7.187013    | 6.9315057   | 6.2500396   | 6.4254227   | 7.08596     | 6.7980194   | 6.28627     | 6.0881033   |
| "Clvs1"   | 2.7557356   | 2.7226136   | 2.6133473   | 2.6822178   | 2.7430952   | 2.7658143   | 2.7414358   | 2.7641246   |
| "Clybl"   | 7.6013947   | 8.245242    | 7.9103074   | 7.998759    | 8.419769    | 7.947771    | 8.203501    | 8.606044    |
| "Cma2"    | 2.860403    | 2.8613915   | 2.762453    | 2.7894614   | 2.9222267   | 2.9210682   | 2.8281734   | 2.9290588   |
| "Cmah"    | 4.87342365  | 4.82378575  | 4.6350547   | 4.923898    | 4.7224002   | 4.72570585  | 4.8293519   | 5.1870835   |
| "Cmas"    | 9.677497    | 10.258695   | 9.981103    | 10.120126   | 9.959737    | 10.127543   | 10.025729   | 9.8663025   |
| "Cmb1"    | 10.306673   | 11.511135   | 11.16888    | 11.664311   | 11.873844   | 11.562764   | 11.792471   | 11.446606   |
| "Cml1"    | 8.409155    | 8.357948    | 8.8572035   | 10.130044   | 8.774491    | 7.9290056   | 10.1314335  | 11.335896   |
| "Cml2"    | 6.953780867 | 7.944290933 | 8.683908567 | 9.549287667 | 8.716022    | 8.782733    | 8.919882767 | 9.2268475   |
| "Cml5"    | 3.757524    | 5.787342    | 3.6332822   | 4.042704    | 3.7486122   | 4.4612937   | 3.7480087   | 5.505783    |
| "Cmpk1"   | 11.221564   | 11.760779   | 11.401141   | 11.499646   | 11.518632   | 11.407083   | 11.573076   | 11.529848   |
| "Cmpk2"   | 3.85903515  | 3.1882917   | 5.00073015  | 4.19822645  | 3.1130166   | 3.12409145  | 3.9927306   | 3.1149926   |
| "Cmntm1"  | 2.6563282   | 2.6386402   | 2.5783947   | 2.6028974   | 2.6944957   | 2.6690373   | 2.6460247   | 2.676573    |
| "Cmntm2a" | 3.2646785   | 3.288343    | 3.1507328   | 3.2300267   | 3.4534976   | 3.369089    | 3.2700984   | 3.340115    |
| "Cmntm3"  | 7.7964764   | 5.8621836   | 8.031908    | 7.4405556   | 6.6626325   | 6.403333    | 7.2179837   | 6.824455    |
| "Cmntm6"  | 8.651795    | 8.2046685   | 8.998933    | 9.0159005   | 8.871683    | 8.6069765   | 9.56708075  | 9.561678    |
| "Cmntm7"  | 4.7251243   | 4.23327545  | 4.99808885  | 4.637793    | 4.4339825   | 4.37409135  | 4.5941665   | 4.26547025  |
| "Cmntm8"  | 8.351059    | 8.831548    | 8.744577    | 9.668664    | 9.087465    | 9.156601    | 9.446466    | 9.654043    |
| "Cnbp"    | 10.5508985  | 10.42205725 | 10.1305     | 10.116977   | 10.385516   | 10.169313   | 10.6981885  | 10.41221475 |
| "Cndp2"   | 8.6747677   | 8.1805895   | 9.0466115   | 8.776906    | 8.269179    | 7.9987307   | 8.4314545   | 8.4880415   |
| "Cnga1"   | 2.3831358   | 2.3597455   | 2.2899618   | 2.3436854   | 2.4067268   | 2.3715389   | 2.3812184   | 2.3641722   |

|            |             |             |             |             |             |             |             |             |
|------------|-------------|-------------|-------------|-------------|-------------|-------------|-------------|-------------|
| "Cngb1"    | 2.802552    | 2.8009725   | 2.7481737   | 2.7646081   | 2.8218284   | 2.8172715   | 2.8229442   | 2.8181586   |
| "Cngb3"    | 3.0224223   | 3.002917    | 2.93354     | 2.9106233   | 3.0608997   | 3.0565093   | 2.965104    | 3.0869727   |
| "Cnih3"    | 9.737838    | 10.2364645  | 10.123471   | 10.212998   | 9.975331    | 9.645459    | 10.098896   | 10.106737   |
| "Cnih4"    | 8.207422    | 7.9096727   | 8.54784     | 8.335026    | 7.6297383   | 8.126413    | 8.256652    | 8.183851    |
| "Cnn2"     | 6.56787     | 5.228983    | 6.998807    | 5.846122    | 5.575541    | 5.400662    | 6.4917855   | 5.866359    |
| "Cnn3"     | 9.88009435  | 9.80383725  | 9.848130917 | 9.93858625  | 9.8527568   | 9.589294    | 10.26573562 | 10.18364177 |
| "Cnnm2"    | 4.4571996   | 4.15329325  | 3.3962483   | 3.6278042   | 3.07583935  | 4.21338915  | 3.34077615  | 3.2161343   |
| "Cnnm3"    | 3.549758633 | 3.115787833 | 3.256258233 | 3.078980067 | 3.1968644   | 3.575444233 | 3.1529305   | 3.129535267 |
| "Cnnm4"    | 2.763039    | 2.7319922   | 2.7412207   | 2.6923847   | 2.7539222   | 2.7452157   | 2.7543874   | 2.7437155   |
| "Cno"      | 6.5477724   | 6.166991    | 5.607454    | 5.713736    | 5.7140527   | 6.117406    | 5.782823    | 5.7598023   |
| "Cnot1"    | 9.031311    | 9.272426    | 9.167844    | 9.29118     | 9.172659    | 9.284013    | 9.307484    | 9.372717    |
| "Cnot2"    | 8.30780925  | 8.3029379   | 8.09931545  | 8.2975885   | 8.259867125 | 8.449097175 | 8.4127395   | 8.47197735  |
| "Cnot3"    | 4.47172     | 4.8903074   | 4.9447026   | 4.865355    | 5.4833612   | 4.8858323   | 5.0302067   | 4.8890247   |
| "Cnot4"    | 5.8788611   | 6.12743704  | 6.04777256  | 6.18321676  | 6.32078204  | 6.37918706  | 6.17185278  | 6.35934536  |
| "Cnot6"    | 7.271801875 | 7.4030179   | 8.1571323   | 7.638679875 | 7.6129896   | 7.243005125 | 8.012711275 | 7.75717465  |
| "Cnot6l"   | 6.739096575 | 6.960254375 | 6.694204925 | 6.96687935  | 6.891555275 | 6.943712875 | 7.032785775 | 7.05892015  |
| "Cnot7"    | 6.790645    | 6.9574406   | 6.4167249   | 6.745062967 | 6.661787167 | 6.8511612   | 6.734337    | 6.448177467 |
| "Cnot8"    | 6.3183063   | 6.47444565  | 7.7175633   | 7.4272342   | 6.91231     | 6.7636753   | 7.6565012   | 7.49455765  |
| "Cnp"      | 4.6303154   | 4.429290133 | 5.201150267 | 5.0325056   | 4.7229802   | 4.196240367 | 4.900761    | 4.942557033 |
| "Cnpy2"    | 8.3691492   | 8.976532133 | 8.6185629   | 8.543800333 | 8.567484933 | 8.629116367 | 8.717579633 | 8.550719733 |
| "Cnpy3"    | 4.6851482   | 4.7717395   | 5.2325277   | 5.03135     | 5.2122455   | 4.367014    | 4.9353395   | 4.9722676   |
| "Cnr2"     | 4.5689483   | 4.0190816   | 4.4895663   | 4.538853    | 4.5836363   | 4.7945275   | 4.8296824   | 4.48498     |
| "Cntd1"    | 7.2458141   | 7.3817806   | 7.3808448   | 7.4439761   | 7.45793595  | 7.45822915  | 7.36540425  | 7.4637162   |
| "Cntf"     | 3.757024    | 4.309324    | 3.1696546   | 3.4610796   | 3.7043374   | 4.194738    | 3.747055    | 4.570618    |
| "Cntfr"    | 2.51534545  | 2.4960374   | 2.413463    | 2.45285605  | 2.5101668   | 2.5155088   | 2.49339645  | 2.4929483   |
| "Cntln"    | 2.762658    | 2.3776598   | 3.346651    | 2.5436711   | 2.5683954   | 2.563021    | 2.815386    | 2.4023871   |
| "Cntn1"    | 2.4280636   | 2.3996613   | 2.3735795   | 2.3584754   | 2.4225893   | 2.4203367   | 2.4170527   | 2.4245987   |
| "Cntn4"    | 2.6777496   | 2.650471    | 2.572805    | 2.6084912   | 2.6796603   | 2.6768212   | 2.6692395   | 2.6761012   |
| "Cntn6"    | 2.5672512   | 2.5352023   | 2.4482713   | 2.5046988   | 2.5653307   | 2.561508    | 2.5476272   | 2.562691    |
| "Cntnap1"  | 2.5660882   | 2.5321355   | 2.477264    | 2.5212805   | 2.5539699   | 2.5467744   | 2.5363255   | 2.557074    |
| "Cntnap2"  | 2.796598    | 2.76975     | 2.7014089   | 2.7425594   | 2.9471426   | 2.799593    | 2.762909    | 2.7986722   |
| "Cntrob"   | 3.3566868   | 3.8664742   | 3.715698    | 3.332501    | 3.3034565   | 3.5482621   | 3.6511831   | 3.3670448   |
| "Coasy"    | 9.002649    | 9.469203    | 9.719118    | 9.909644    | 10.39881    | 10.212979   | 10.248268   | 10.28486    |
| "Cobra1"   | 7.3969183   | 7.2125664   | 7.285408    | 7.437681    | 7.2774353   | 7.2507963   | 7.4600635   | 7.326943    |
| "Cog1"     | 5.52498934  | 5.835335    | 5.64791806  | 5.75517754  | 5.69284734  | 5.75478902  | 5.90905098  | 5.9111364   |
| "Cog2"     | 5.243811    | 4.9632716   | 4.938486    | 5.150006    | 4.776456    | 4.980122    | 5.07405     | 4.9665885   |
| "Cog4"     | 5.8056032   | 6.032685667 | 5.951096633 | 6.4302527   | 6.476278633 | 6.377692433 | 6.431326633 | 6.475145867 |
| "Cog6"     | 6.42089     | 7.391256    | 7.3941455   | 7.538438    | 7.831625    | 7.487496    | 7.831993    | 7.2063584   |
| "Cog8"     | 7.5148563   | 7.61663885  | 7.6346465   | 7.114579    | 7.657467    | 7.57573     | 7.5834272   | 7.57508235  |
| "Coil"     | 5.583833    | 5.4693813   | 5.860372    | 5.4105444   | 5.576179    | 5.3962336   | 5.6195183   | 5.595455    |
| "Col11a1"  | 2.7671938   | 2.7393622   | 2.6264555   | 2.6821568   | 2.7826564   | 2.779423    | 2.7375093   | 2.7792609   |
| "Col12a1"  | 2.6671238   | 2.655846    | 2.6323144   | 2.7699902   | 2.6740377   | 2.6618402   | 2.6274023   | 2.8431153   |
| "Col13a1"  | 7.506955    | 7.45795     | 4.8400455   | 6.2490683   | 7.0095615   | 7.3451443   | 6.4044256   | 6.6392097   |
| "Col14a1"  | 7.4104507   | 6.19719435  | 7.99074175  | 7.79033925  | 7.413898    | 6.8907709   | 8.035643    | 7.4486845   |
| "Col16a1"  | 3.776449    | 4.0275607   | 4.3592668   | 4.1627326   | 4.1572614   | 4.3857737   | 4.073128    | 4.22612     |
| "Col17a1"  | 2.4136932   | 2.3858583   | 2.3430452   | 2.368233    | 2.4098184   | 2.4042938   | 4.2022148   | 2.397889    |
| "Col18a1"  | 9.868007    | 10.356207   | 10.1680265  | 10.4458995  | 10.550007   | 10.3087335  | 10.261464   | 10.3904925  |
| "Col19a1"  | 2.42218925  | 2.3952324   | 2.33882025  | 2.3735035   | 2.41984025  | 2.41582615  | 2.41223835  | 2.41087555  |
| "Col1a1"   | 3.3094028   | 3.48893745  | 3.35717825  | 3.3473556   | 3.33875655  | 3.3329691   | 3.34316865  | 3.3357834   |
| "Col1a2"   | 6.8063767   | 7.1022866   | 7.8617777   | 7.2970785   | 6.62992125  | 6.52422905  | 7.043157    | 6.91426225  |
| "Col20a1"  | 2.7924489   | 2.7575377   | 2.6810955   | 2.95459295  | 2.7926211   | 2.7906691   | 2.77564775  | 2.81444595  |
| "Col22a1"  | 2.4897595   | 2.45740925  | 2.41271725  | 2.4378755   | 2.4829268   | 2.47793425  | 2.4735893   | 2.4739361   |
| "Col25a1"  | 2.1163685   | 2.1355968   | 2.0345972   | 2.0597708   | 2.100876    | 2.5403686   | 2.0895884   | 2.0874307   |
| "Col3a1"   | 6.195416    | 7.05853885  | 7.28018825  | 7.28408075  | 6.3038604   | 5.8529149   | 7.29967925  | 6.8033499   |
| "Col4a1"   | 9.238474    | 8.37069465  | 8.476727    | 8.190392    | 7.1810968   | 7.67407275  | 7.66718375  | 7.0971055   |
| "Col4a2"   | 6.7675915   | 6.6390853   | 7.6941867   | 7.495757    | 6.5299473   | 6.5401583   | 7.2128553   | 6.88877     |
| "Col4a3bp" | 3.934434567 | 4.464694533 | 4.685728833 | 4.742273767 | 4.863761667 | 5.024930933 | 5.1194805   | 4.992563267 |
| "Col4a4"   | 2.816014    | 2.7932987   | 2.7872016   | 2.7455075   | 2.8072796   | 2.8039079   | 2.7590096   | 2.8568246   |
| "Col4a5"   | 2.91936015  | 2.83854915  | 3.7854332   | 2.7522031   | 2.9327269   | 2.86267195  | 3.7168261   | 2.8175144   |
| "Col4a6"   | 3.1916952   | 3.1884148   | 3.1352086   | 3.0788252   | 3.20692     | 3.3747158   | 3.135573    | 3.1947227   |
| "Col5a1"   | 4.61005625  | 4.1756481   | 5.9297992   | 5.0642909   | 4.49293355  | 4.16953565  | 5.31763195  | 4.76100645  |
| "Col5a2"   | 4.75414695  | 4.4635225   | 5.2783987   | 4.75870195  | 4.5155731   | 4.5349271   | 4.36317185  | 4.39369225  |
| "Col5a3"   | 4.5649915   | 4.1693177   | 4.758847    | 5.4811335   | 4.6511517   | 4.6229916   | 4.646818    | 6.3967214   |
| "Col6a1"   | 4.1790237   | 3.8572912   | 4.4142466   | 4.1223536   | 4.8908334   | 3.7883687   | 4.4593935   | 4.1317654   |
| "Col6a2"   | 3.0499859   | 3.0007688   | 3.3038813   | 3.00920225  | 2.84144645  | 3.0141646   | 3.2692398   | 3.0170957   |
| "Col6a3"   | 5.4006824   | 4.745365    | 7.1230736   | 6.672571    | 5.2612276   | 5.464935    | 6.4822516   | 5.749637    |
| "Col9a1"   | 2.622861    | 2.6088524   | 2.515201    | 2.590043    | 2.64924     | 2.639196    | 2.595907    | 2.6500258   |
| "Col9a2"   | 2.599463    | 2.569811    | 2.5271125   | 2.5510335   | 2.5937166   | 2.5895789   | 2.5888424   | 2.5830622   |
| "Col9a3"   | 2.9946269   | 3.01253555  | 2.83248325  | 2.91695015  | 3.07896245  | 3.0788564   | 2.9624773   | 3.0781456   |
| "Colec12"  | 7.799118    | 7.6385136   | 7.2119327   | 7.4475737   | 7.5076265   | 7.0359483   | 7.7655854   | 7.533249    |
| "Colq"     | 2.5764582   | 2.5437508   | 2.5054417   | 2.5224617   | 2.5725436   | 2.5538785   | 2.5629447   | 2.5513608   |
| "Commnd1"  | 8.7017355   | 8.975996    | 9.196929    | 9.2338715   | 8.712773    | 8.633472    | 9.4054415   | 9.185355    |
| "Commnd2"  | 7.572731    | 8.083086    | 8.020185    | 7.732036    | 7.918134    | 7.730678    | 7.711807    | 7.7708044   |
| "Commnd4"  | 6.960943    | 7.4189434   | 7.661735    | 7.777255    | 7.4518514   | 7.4399514   | 7.4490204   | 7.8004484   |
| "Commnd5"  | 5.3818481   | 6.57346345  | 6.34154125  | 6.388581    | 6.2713001   | 6.38126375  | 6.41960455  | 6.4577235   |
| "Commnd6"  | 8.640148    | 8.742081    | 8.628668    | 8.918694    | 8.356022    | 8.635424    | 8.79        | 8.603891    |
| "Commnd7"  | 7.196445    | 6.8239236   | 7.2918816   | 6.973971    | 6.7406235   | 6.879329    | 7.099032    | 6.9624567   |
| "Commnd9"  | 7.133540033 | 7.4378372   | 7.18113     | 7.1447702   | 7.676870533 | 7.1998275   | 7.1066497   | 7.1309463   |
| "Comt"     | 10.8308305  | 10.531178   | 11.0804265  | 11.3462475  | 10.9671235  | 9.857175    | 10.4833555  | 11.83369025 |
| "Comtd1"   | 5.5293493   | 5.0194526   | 6.0461445   | 5.154745    | 5.2060766   | 5.9049873   | 5.5812798   | 5.4000826   |
| "Copa"     | 9.108875    | 9.3879595   | 9.417808    | 9.3170805   | 9.489669    | 9.240224    | 9.421674    | 9.479765    |

|            |             |             |             |             |             |             |             |             |
|------------|-------------|-------------|-------------|-------------|-------------|-------------|-------------|-------------|
| "Copb1"    | 10.128942   | 10.258786   | 9.676568    | 9.698021    | 10.070223   | 10.31959    | 9.860749    | 9.942375    |
| "Copb2"    | 10.214584   | 10.164826   | 10.262958   | 9.8527405   | 10.199143   | 9.9383655   | 9.955867    | 9.7909845   |
| "Cope"     | 9.781723    | 10.518053   | 10.376505   | 10.111729   | 10.199909   | 9.995106    | 10.046408   | 10.286871   |
| "Copp"     | 7.466855    | 7.932654    | 8.07536215  | 7.537504    | 7.93147     | 7.292512    | 7.4208265   | 7.5041217   |
| "Copp2"    | 6.0425205   | 6.716827    | 7.2204013   | 7.481325    | 7.0910144   | 6.906195    | 7.659791    | 7.322813    |
| "Copp2as2" | 3.68662868  | 3.60624138  | 3.52806322  | 3.78688156  | 3.98442402  | 3.77009126  | 4.00998544  | 4.02126736  |
| "Cops2"    | 9.592228    | 9.3650275   | 8.623941    | 8.896864    | 9.0898435   | 9.15510275  | 8.811941    | 9.0078755   |
| "Cops3"    | 10.069435   | 10.448789   | 10.265567   | 10.348785   | 10.552752   | 10.445343   | 10.159449   | 10.324112   |
| "Cops4"    | 8.228472    | 8.498866    | 8.381968    | 8.323237    | 8.368222    | 8.179617    | 8.327054    | 8.329562    |
| "Cops5"    | 6.58160905  | 6.8407594   | 6.6196791   | 6.6628816   | 6.79796465  | 6.85120635  | 6.747096    | 6.8037541   |
| "Cops6"    | 6.28832495  | 6.94446445  | 6.5755506   | 6.99389635  | 6.76918965  | 6.86982985  | 6.7975573   | 6.90824285  |
| "Cops7a"   | 5.376541    | 5.85784695  | 5.901957    | 6.28835295  | 5.55615365  | 5.84050775  | 6.0964655   | 6.04243755  |
| "Cops7b"   | 4.094677    | 4.19095505  | 4.5376011   | 4.4314695   | 4.6006743   | 4.23964035  | 4.28745435  | 5.172101    |
| "Cops8"    | 8.039945    | 7.872732    | 7.5012684   | 7.634702    | 7.4842634   | 7.5904813   | 7.5867023   | 7.4936557   |
| "Copp1"    | 9.253418    | 9.326114    | 10.002124   | 9.718752    | 9.522072    | 9.027388    | 9.627636    | 9.681275    |
| "Copp2"    | 5.9787407   | 7.114321    | 7.085414    | 7.4456997   | 6.821262    | 6.2032332   | 6.8121495   | 6.620057    |
| "Coq10a"   | 6.361433    | 6.703856    | 5.7596884   | 6.6151752   | 6.610924    | 6.8929954   | 6.3851223   | 6.7138386   |
| "Coq3"     | 4.41783875  | 6.706031    | 6.18628005  | 6.5014388   | 6.709932    | 6.63558135  | 6.653862    | 6.33681875  |
| "Coq4"     | 5.4192896   | 5.398015    | 5.896493    | 5.977736    | 5.482093    | 5.03934     | 5.6334667   | 5.230188    |
| "Coq5"     | 6.10242825  | 6.39658095  | 6.53273925  | 6.3806065   | 6.6758098   | 6.43512845  | 6.6079119   | 6.63569185  |
| "Coq6"     | 5.2618484   | 5.6629486   | 5.6271358   | 5.63894     | 5.7400045   | 5.745592    | 6.1098933   | 5.660467    |
| "Coq7"     | 9.181991    | 10.1578455  | 9.996889    | 9.821289    | 8.998646    | 9.123553    | 8.913347    | 9.448033    |
| "Coq9"     | 10.127061   | 10.581518   | 10.389198   | 10.385634   | 10.404949   | 10.494279   | 10.164633   | 10.278637   |
| "Corin"    | 4.1161246   | 4.083987    | 5.9314504   | 3.3068829   | 6.3352356   | 5.547327    | 7.9406404   | 4.117276    |
| "Coro1a"   | 5.4644142   | 4.704991267 | 5.897016667 | 5.1601741   | 5.086567967 | 4.701026767 | 5.1310853   | 4.923644667 |
| "Coro1b"   | 6.8554316   | 6.511419    | 7.4522176   | 7.205705    | 7.1107264   | 7.0122867   | 6.928532    | 6.952167    |
| "Coro1c"   | 6.2569065   | 5.681823    | 5.8478265   | 5.8509846   | 5.9136963   | 5.714736    | 5.981189    | 5.9433966   |
| "Coro2a"   | 3.3423028   | 3.3973641   | 3.2402182   | 3.3029153   | 3.4432602   | 3.3950262   | 3.3617969   | 3.3906045   |
| "Coro2b"   | 2.1773261   | 2.410524    | 2.29928865  | 2.39287505  | 2.4821473   | 2.58159755  | 3.0134928   | 2.41363015  |
| "Coro6"    | 3.1716318   | 3.1821046   | 2.9878867   | 3.0604112   | 3.2606587   | 3.2148578   | 3.105722    | 3.5277314   |
| "Cott1"    | 7.9338802   | 7.06408046  | 8.25873026  | 7.39057936  | 7.3019644   | 7.09802492  | 7.41629994  | 7.24707624  |
| "Cox15"    | 6.801973367 | 7.643667233 | 7.6204068   | 7.4481278   | 7.770258667 | 7.435984    | 8.112722    | 7.570165333 |
| "Cox16"    | 5.53175465  | 5.77268085  | 5.66877065  | 5.7511746   | 5.6000542   | 5.6452551   | 5.7137978   | 5.7182623   |
| "Cox17"    | 6.8333214   | 6.82524365  | 6.9559119   | 6.8445858   | 6.87290345  | 6.89695475  | 6.97745065  | 6.9164885   |
| "Cox18"    | 6.6723022   | 7.57584     | 7.447739    | 7.6483693   | 7.438953    | 7.1064405   | 7.5450845   | 7.40773     |
| "Cox19"    | 7.899641    | 8.593934    | 8.582867    | 8.5229845   | 8.17894     | 7.8380995   | 8.290044    | 8.312669    |
| "Cox41i"   | 12.996427   | 13.134154   | 12.730519   | 12.827291   | 13.079536   | 13.19292    | 13.035781   | 13.14354    |
| "Cox4nb"   | 7.6244245   | 7.9288034   | 7.561592    | 7.6033053   | 7.4513474   | 7.813733    | 7.261671    | 7.4008408   |
| "Cox5a"    | 13.15157567 | 13.181628   | 13.23782467 | 13.30278067 | 13.187527   | 13.248394   | 13.57896267 | 13.502789   |
| "Cox5b"    | 8.987715583 | 9.37829655  | 9.167210667 | 9.34267145  | 9.327657233 | 9.291103983 | 9.340163917 | 9.454965667 |
| "Cox6a1"   | 13.4108995  | 13.7177065  | 13.4117055  | 13.6026315  | 13.6712755  | 13.617219   | 13.665821   | 13.6695085  |
| "Cox6b1"   | 12.27241    | 12.670836   | 12.530291   | 12.633119   | 12.505622   | 12.38761225 | 12.6134395  | 12.6955535  |
| "Cox6c"    | 12.2013835  | 12.3150875  | 11.990877   | 12.3085925  | 12.3517625  | 12.266895   | 12.6236845  | 12.4805135  |
| "Cox7a1"   | 3.1901147   | 3.0174053   | 3.725234    | 2.9103343   | 3.068963    | 3.088565    | 4.4654846   | 4.6442904   |
| "Cox7a2"   | 12.1680845  | 12.458622   | 12.411516   | 12.4423225  | 12.3271325  | 12.3454505  | 12.492609   | 12.62835525 |
| "Cox7a2l"  | 10.98696733 | 10.96319067 | 10.4555405  | 10.37366967 | 10.82333033 | 10.9019335  | 10.04291667 | 10.49627467 |
| "Cox7c"    | 6.981137233 | 6.568568467 | 6.327992633 | 6.516885133 | 6.795651833 | 6.852795467 | 6.660079333 | 7.254054867 |
| "Cox8a"    | 7.742662867 | 8.025392533 | 7.809949    | 7.820807    | 7.820680333 | 7.689845867 | 7.724188667 | 7.780749833 |
| "Cox8b"    | 2.2799723   | 2.2478857   | 2.1693919   | 2.2307746   | 2.388012    | 2.2560887   | 2.270582    | 2.2569888   |
| "Cox8c"    | 2.4043357   | 2.3714104   | 2.3569365   | 2.3552182   | 2.3871205   | 2.3885849   | 2.3611255   | 2.3756378   |
| "Cp"       | 11.3815509  | 10.79477339 | 11.33200586 | 10.93275586 | 10.75019414 | 10.91790181 | 10.64855016 | 10.61579141 |
| "Cpb2"     | 7.90291995  | 7.6976894   | 7.9524628   | 7.75628245  | 7.7395862   | 7.76783065  | 7.74871685  | 7.79044325  |
| "Cpd"      | 5.15965696  | 4.99153344  | 5.11438908  | 5.0438581   | 5.05925118  | 4.74542474  | 5.05716728  | 5.04079332  |
| "Cpe"      | 7.410225    | 5.6361365   | 6.582878    | 5.6804905   | 6.052569    | 3.8240125   | 5.7243214   | 4.584008    |
| "Cpeb1"    | 3.3660204   | 3.410991    | 3.877388    | 5.032348    | 3.4326825   | 3.4222012   | 3.5217726   | 3.4351106   |
| "Cpeb2"    | 10.799966   | 10.261328   | 8.901765    | 9.016032    | 9.278882    | 10.343177   | 10.241792   | 9.159622    |
| "Cpeb3"    | 6.616945533 | 6.2902736   | 6.231752133 | 6.693964433 | 6.118748    | 5.7670891   | 6.128380333 | 6.4654827   |
| "Cpeb4"    | 9.8816025   | 9.331357    | 9.472096    | 9.735756    | 9.30922425  | 9.67481     | 10.277159   | 9.9135      |
| "Cphx"     | 2.91520315  | 2.91666405  | 2.833873825 | 2.8386113   | 2.953588475 | 2.95636335  | 2.880846275 | 3.011219625 |
| "Cplx1"    | 2.9137053   | 2.878910633 | 2.793440567 | 2.757830967 | 2.7377053   | 2.858368567 | 2.756769667 | 2.792101767 |
| "Cplx4"    | 2.4903424   | 2.4758394   | 2.3644197   | 2.439449    | 2.5245292   | 2.5224726   | 2.4600368   | 2.4795616   |
| "Cpn1"     | 10.761029   | 10.603932   | 10.591333   | 10.526469   | 10.510462   | 10.735784   | 10.71531    | 10.715645   |
| "Cpn2"     | 12.260527   | 12.578369   | 12.365091   | 12.677759   | 12.640486   | 12.700405   | 12.284792   | 12.513344   |
| "Cpne1"    | 8.2283535   | 8.371846    | 8.224822    | 8.502389    | 8.369141    | 8.413298    | 8.389298    | 8.495114    |
| "Cpne2"    | 4.6676774   | 4.0785923   | 4.9245467   | 4.183999    | 4.47285     | 4.975537    | 4.7853084   | 4.8737674   |
| "Cpne3"    | 9.724213    | 9.556908    | 10.362675   | 10.351716   | 9.514627    | 9.823427    | 10.1251335  | 10.308515   |
| "Cpox"     | 6.40798565  | 7.6516933   | 6.916572    | 7.3517272   | 8.34018285  | 7.64325875  | 8.35306965  | 7.708071    |
| "Cppe1"    | 8.067896    | 8.328487    | 8.437379    | 8.439395    | 8.435167    | 8.1896105   | 9.133961    | 8.376997    |
| "Cps1"     | 14.295401   | 14.502247   | 13.9765005  | 14.185399   | 14.319988   | 14.563624   | 14.054048   | 14.311373   |
| "Cpsf1"    | 7.734434    | 8.013233    | 7.7825384   | 8.006585    | 8.169256    | 8.113658    | 8.007471    | 8.013062    |
| "Cpsf2"    | 6.04418705  | 6.22944285  | 6.57053425  | 6.10194915  | 6.7152519   | 6.6263465   | 6.6011533   | 6.50228535  |
| "Cpsf3"    | 7.600515733 | 7.594768833 | 7.612571667 | 7.477928867 | 7.5449768   | 7.545455567 | 7.562730667 | 7.577034    |
| "Cpsf3l"   | 5.586481    | 5.689624    | 5.6999297   | 6.0328164   | 5.9769955   | 6.5318503   | 5.9898043   | 6.1057334   |
| "Cpsf4"    | 7.2280116   | 7.5264435   | 7.1687307   | 7.373327    | 7.444841    | 7.3451934   | 7.0184207   | 7.408115    |
| "Cpsf4l"   | 2.88144605  | 4.0092642   | 3.055484    | 3.567584    | 4.18244665  | 3.22337655  | 3.73686705  | 3.59011485  |
| "Cpsf7"    | 8.959008    | 8.830659    | 8.777016    | 8.634186    | 8.929349    | 8.943688    | 8.741416    | 8.890815    |
| "Cpt1a"    | 10.68380367 | 10.689703   | 9.315776333 | 9.917678333 | 10.48894133 | 10.818133   | 10.28020367 | 9.964835    |
| "Cpt2"     | 6.47039025  | 7.2880384   | 6.7212689   | 6.9366808   | 7.5821998   | 7.7401205   | 7.3233685   | 7.09468775  |
| "Cpxm1"    | 2.5478883   | 2.613172    | 2.5087638   | 2.5339708   | 2.556614    | 2.5680723   | 2.5798137   | 2.5962942   |
| "Cpxm2"    | 2.5367007   | 2.5053582   | 2.454392    | 2.4798758   | 2.5274513   | 2.5117087   | 2.5260787   | 2.5076823   |
| "Cr1l"     | 9.036938    | 9.143282    | 9.926486    | 9.634044    | 9.376737    | 9.239534    | 9.68167     | 9.802251    |

|              |             |             |             |             |             |             |             |             |
|--------------|-------------|-------------|-------------|-------------|-------------|-------------|-------------|-------------|
| "Cr2"        | 2.6415763   | 2.6083772   | 2.571239    | 2.5958233   | 2.6336043   | 2.6239984   | 2.759548    | 2.6412408   |
| "Crabp1"     | 2.626007    | 2.6073184   | 2.5378923   | 2.5689433   | 2.631904    | 2.6678028   | 2.6053262   | 2.6211567   |
| "Crabp2"     | 2.4623406   | 2.4334648   | 2.3662055   | 2.424056    | 2.4610002   | 2.458728    | 2.463813    | 2.4474008   |
| "Cradd"      | 4.9957275   | 5.4459815   | 4.8596582   | 4.5348353   | 4.745895    | 5.2924743   | 4.895051    | 4.7584767   |
| "Cramp1l"    | 6.516810333 | 6.055399533 | 5.8699999   | 6.041840133 | 6.249641567 | 6.194155867 | 6.065674733 | 5.986030667 |
| "Crat"       | 4.5319484   | 5.158328    | 4.3000991   | 3.9191841   | 5.17796805  | 5.2525861   | 4.55112755  | 4.078934    |
| "Crb1"       | 2.566765    | 2.5320053   | 2.5612311   | 2.528465    | 2.5821595   | 2.5534358   | 2.5442307   | 2.60771     |
| "Crb3"       | 4.7379146   | 5.02880185  | 5.1889481   | 4.89869115  | 4.69945875  | 4.8599267   | 5.05973415  | 4.97424565  |
| "Crbn"       | 8.1069792   | 8.250290333 | 7.875379667 | 8.249068333 | 8.1319518   | 8.259609667 | 8.069026    | 8.150748    |
| "Crcp"       | 10.09403    | 9.425684    | 7.903532    | 8.666172    | 8.926556    | 9.161288    | 7.9459066   | 8.129805    |
| "Crcr1"      | 2.4459586   | 2.4121299   | 2.3575668   | 2.366977    | 2.4376445   | 2.4263158   | 2.4259398   | 2.4191096   |
| "Creb1"      | 2.9047562   | 2.888440267 | 2.8397417   | 2.8396058   | 2.923029133 | 3.0033504   | 2.879366033 | 3.047208233 |
| "Creb3"      | 8.676950667 | 8.986148333 | 8.319265133 | 8.421153867 | 8.4357008   | 8.686920567 | 8.012643333 | 8.123729667 |
| "Creb3l2"    | 5.4891048   | 5.57701115  | 5.85250615  | 5.8477917   | 5.3267506   | 5.08811985  | 5.3693825   | 5.42050085  |
| "Creb3l3"    | 10.048824   | 10.966722   | 9.144868    | 9.45557     | 10.967824   | 11.177825   | 10.097583   | 10.404119   |
| "Creb3l4"    | 2.6813908   | 2.6875548   | 2.626487    | 2.6276002   | 2.6746225   | 2.8059485   | 2.6669726   | 2.6607006   |
| "Crebbp"     | 7.2286363   | 7.1176844   | 6.4589124   | 6.6058116   | 6.955961    | 7.2914205   | 6.908862    | 6.737999    |
| "Crebzf"     | 4.44913635  | 4.85715965  | 4.77834205  | 4.92293485  | 5.25026845  | 5.3257115   | 5.1964331   | 5.0290099   |
| "Creg1"      | 12.8948805  | 12.9523365  | 13.302701   | 13.0838465  | 13.03822775 | 13.3987005  | 12.8031235  | 12.5731155  |
| "Crelld1"    | 7.07903     | 7.0171967   | 6.465049    | 7.2803993   | 7.0694027   | 7.6606846   | 6.677802    | 6.900295    |
| "Crelld2"    | 8.098867    | 8.27014     | 7.97799     | 7.828058    | 10.644997   | 9.457424    | 7.9869733   | 8.270906    |
| "Crem"       | 7.131499133 | 4.853081    | 5.036959467 | 5.012870233 | 4.954361067 | 5.648741333 | 5.041632967 | 5.266879233 |
| "Crrh1"      | 2.9587243   | 2.9343648   | 2.878314    | 2.8948605   | 2.9437141   | 2.9365556   | 2.939105    | 2.9297135   |
| "Crrh2"      | 3.2808557   | 3.244205    | 3.0140927   | 3.2447882   | 3.2886226   | 3.3704743   | 3.1437366   | 3.3570085   |
| "Crim1"      | 6.239263    | 5.6157308   | 5.69271775  | 5.5829817   | 5.4574907   | 5.542359    | 5.42496265  | 5.623509    |
| "Crip1"      | 8.734805    | 7.5794997   | 9.152055    | 8.408107    | 7.686097    | 7.143177    | 8.14801     | 8.01256     |
| "Crip2"      | 8.989035    | 9.496042    | 9.050315    | 9.031266    | 9.120634    | 8.910181    | 9.140632    | 8.585365    |
| "Crip3"      | 2.6952105   | 2.883161    | 2.5591176   | 2.6325555   | 2.8356156   | 2.6821072   | 2.6639507   | 2.6824577   |
| "Cript"      | 6.9811087   | 7.0682762   | 6.5700516   | 6.77947025  | 6.8444093   | 6.8724746   | 6.83264325  | 6.71180385  |
| "Crisp1"     | 2.5367734   | 2.5095465   | 2.4210203   | 2.4530652   | 2.55074     | 2.5492926   | 2.5012178   | 2.5475879   |
| "Crisp2"     | 2.7189686   | 2.695902    | 2.6410382   | 2.633452    | 2.7552574   | 2.7170284   | 2.7200282   | 2.727294    |
| "Crisp3"     | 2.7059598   | 2.6802804   | 2.5723708   | 2.6188157   | 2.7240064   | 2.7211032   | 2.6805873   | 2.775549    |
| "Crispld1"   | 2.4657006   | 2.432416    | 2.354638    | 2.40794     | 2.463417    | 2.4616108   | 2.457788    | 2.4586997   |
| "Crk"        | 6.702149175 | 6.938236625 | 6.39478585  | 6.4718217   | 6.9456967   | 6.7293356   | 6.77346675  | 6.872578625 |
| "Crkl"       | 8.091219    | 8.0199795   | 8.084967    | 7.9106307   | 8.17436     | 8.327967    | 7.6711817   | 8.005156    |
| "Crif2"      | 10.009011   | 8.990568    | 10.083033   | 9.533365    | 8.904148    | 9.076012    | 8.957968    | 8.960286    |
| "Crif3"      | 8.217266    | 8.412936    | 8.589003    | 8.443366    | 8.345       | 8.683885    | 8.331698    | 8.016366    |
| "Crnk1l"     | 3.8024814   | 4.61316435  | 4.2944667   | 4.33755345  | 3.88268025  | 4.3953199   | 4.624864    | 3.82813355  |
| "Crot"       | 12.337369   | 11.506006   | 12.217412   | 12.366185   | 12.584689   | 12.392325   | 13.415612   | 12.888607   |
| "Crp"        | 12.813144   | 11.757985   | 12.903687   | 12.927873   | 12.186252   | 12.726135   | 12.613737   | 12.764853   |
| "Crtam"      | 2.6624742   | 2.4803886   | 2.3920639   | 2.6099682   | 2.503804    | 2.5066645   | 2.4972372   | 2.4869146   |
| "Crtap"      | 5.997539    | 5.6299934   | 7.1794205   | 6.403051    | 5.3173223   | 6.1160064   | 6.4339175   | 6.214989    |
| "Crtc2"      | 5.940581    | 6.01505     | 5.4121237   | 5.5429993   | 4.7342315   | 5.897546    | 5.6848583   | 5.5720863   |
| "Crtc3"      | 3.6253915   | 3.7706764   | 3.5756733   | 3.599364    | 3.3050108   | 3.3583322   | 3.1993964   | 4.1646833   |
| "Crx"        | 2.6678853   | 2.6375318   | 2.537118    | 2.6108017   | 2.6665726   | 2.6628556   | 2.6408443   | 2.654163    |
| "Crxos1"     | 2.6068041   | 2.577147    | 2.491154    | 2.5298467   | 2.6274967   | 2.6076875   | 2.5867326   | 2.605985    |
| "Cryl1"      | 9.663132    | 7.4401107   | 6.020978    | 6.3496904   | 7.498377    | 7.570549    | 6.5100784   | 6.890392    |
| "Cry2"       | 9.785486    | 7.551902    | 6.4127183   | 7.582976    | 7.1221757   | 7.1719766   | 6.7958355   | 7.330213    |
| "Cryab"      | 4.54583515  | 3.8749403   | 4.5230389   | 4.2441077   | 4.1631995   | 3.9351879   | 4.571368    | 4.27211115  |
| "Crybb2"     | 3.1166294   | 3.1195848   | 3.054506    | 3.046332    | 3.1749969   | 3.1852164   | 3.0526512   | 3.1938963   |
| "Crybb3"     | 2.76706     | 2.6045315   | 3.3025718   | 2.825047    | 2.7488353   | 2.837838    | 2.601695    | 2.7366047   |
| "Crybg3"     | 5.310483    | 6.083022    | 4.6392784   | 4.534083    | 4.988582    | 5.4972086   | 5.151756    | 4.710668    |
| "Crygb"      | 2.5668132   | 2.5399067   | 2.4784753   | 2.7671442   | 2.5548618   | 2.5602589   | 2.5505269   | 2.5530818   |
| "Crygd"      | 3.0697      | 3.0393546   | 2.9619856   | 2.9943838   | 3.0605903   | 3.0554414   | 3.0575747   | 3.0979323   |
| "Crygn"      | 2.6782024   | 2.8268414   | 2.5884356   | 2.9628005   | 2.6703804   | 2.6655028   | 2.6758063   | 3.281443    |
| "Cryl1"      | 5.9122065   | 5.69341775  | 6.21519535  | 6.30795645  | 6.71692935  | 6.2054477   | 6.57274535  | 7.23108865  |
| "Crym"       | 2.9544425   | 2.8092155   | 3.234867    | 3.4107218   | 4.3462267   | 3.2005315   | 3.2411788   | 3.866085    |
| "Cryz"       | 9.8708155   | 10.315967   | 10.2960695  | 10.802495   | 10.494429   | 10.1975605  | 10.8648155  | 10.709787   |
| "Cryzl1"     | 7.4092894   | 7.564121    | 8.056961    | 7.7854824   | 7.405381    | 7.9927683   | 7.515669    | 7.676933    |
| "Cs"         | 9.018297667 | 9.904103167 | 9.596867    | 9.578012333 | 10.04510933 | 9.675669333 | 9.866799    | 9.898956333 |
| "Csad"       | 10.278209   | 9.140376    | 9.765746    | 9.431418    | 10.431242   | 10.515318   | 10.618754   | 9.43306     |
| "Csda"       | 9.302442    | 9.365808    | 8.8353285   | 8.680298    | 9.0255885   | 9.530138    | 8.9223805   | 8.7570995   |
| "Csdcl2"     | 2.6297379   | 2.640188367 | 2.582620133 | 2.618078433 | 2.685520267 | 2.6768749   | 2.624694333 | 2.691834967 |
| "Csde1"      | 11.0704015  | 11.196739   | 10.809986   | 10.967056   | 11.204482   | 11.125648   | 10.892989   | 11.0758645  |
| "Cse1l"      | 7.9073296   | 8.070557    | 8.481295    | 8.279501    | 8.258297    | 8.295845    | 8.466816    | 8.549698    |
| "Csfl1"      | 4.9813661   | 4.9569606   | 5.262371375 | 5.06324355  | 4.997044    | 5.027603075 | 4.576001275 | 4.4283084   |
| "Csfl1r"     | 10.810009   | 8.949587    | 11.05094067 | 10.652069   | 9.939687    | 9.647009    | 10.24668367 | 9.839562667 |
| "Csfl2"      | 2.538613    | 2.5071747   | 2.4450624   | 2.4762335   | 2.5507555   | 2.5227592   | 2.5280797   | 2.548406    |
| "Csfl2ra"    | 4.594699    | 3.0396912   | 4.7024803   | 3.9202857   | 3.2653806   | 3.113996    | 3.2173705   | 3.2539701   |
| "Csfl2rb"    | 7.191905    | 4.272563    | 5.8378763   | 5.08924     | 4.9820557   | 4.9131956   | 5.0956383   | 4.95288     |
| "Csfl2rb2"   | 7.305341    | 4.299796    | 7.1136565   | 5.823778    | 4.896165    | 5.012907    | 5.233572    | 4.6782494   |
| "Csfl3r"     | 5.307291    | 5.1076684   | 5.8783875   | 5.012804    | 5.1269097   | 5.118009    | 5.137277    | 5.332304    |
| "Csgalnact1" | 3.03241945  | 2.8499894   | 2.77214465  | 2.9122851   | 3.0212166   | 2.89311885  | 2.8240001   | 2.806345    |
| "Csgalnact2" | 8.436093    | 8.013409    | 7.8784666   | 7.9072275   | 7.67293     | 8.059534    | 7.9531126   | 7.7478094   |
| "Csk"        | 5.3565464   | 4.889455    | 5.733408    | 5.838185    | 5.401733    | 5.4075584   | 5.4078655   | 5.754427    |
| "Csl"        | 3.2136154   | 3.1807513   | 3.0639277   | 3.1761477   | 3.2014098   | 3.2203047   | 3.0676713   | 3.226035    |
| "Csn1s2a"    | 2.498870233 | 2.476135    | 2.404512933 | 2.4307904   | 2.505951233 | 2.502807867 | 2.479197433 | 2.5283224   |
| "Csn1s2b"    | 2.4844906   | 2.459209    | 2.3856905   | 2.411394    | 2.483147    | 2.5170186   | 2.4682      | 2.473458    |
| "Csnk1a1"    | 8.2102834   | 7.985555667 | 7.8848037   | 7.8823319   | 8.003227533 | 8.081016167 | 8.0048723   | 7.8509639   |
| "Csnk1d"     | 7.36747598  | 7.17601352  | 6.89759638  | 6.76328194  | 6.7812608   | 6.92609866  | 6.67231076  | 6.6701183   |
| "Csnk1e"     | 5.26328205  | 4.5434483   | 4.370904    | 4.52025215  | 4.54857115  | 5.065668    | 4.60633275  | 4.545792    |

|             |             |             |             |             |             |             |             |             |
|-------------|-------------|-------------|-------------|-------------|-------------|-------------|-------------|-------------|
| "Csnk1g1"   | 2.87915     | 2.7801638   | 2.7664065   | 3.0346317   | 2.8916383   | 2.9736588   | 3.1585243   | 2.850143    |
| "Csnk1g2"   | 6.362823    | 6.8728375   | 6.96518     | 6.5200768   | 6.1623154   | 6.1771355   | 6.3903623   | 6.7718797   |
| "Csnk2a1"   | 6.261650717 | 6.680667367 | 6.336786867 | 6.764377283 | 6.537213783 | 6.457603233 | 6.68770215  | 6.562650933 |
| "Csnk2a2"   | 7.5306498   | 7.6990683   | 7.0313028   | 7.592407833 | 7.200073667 | 7.856736333 | 7.261269767 | 7.5830749   |
| "Csnk2b"    | 9.831894    | 10.235501   | 9.777659    | 9.845655    | 9.969136    | 10.044145   | 9.591951    | 9.96011     |
| "Cspg4"     | 2.4445865   | 2.4261212   | 2.3964376   | 2.4117324   | 2.4486132   | 2.4392886   | 2.4501703   | 2.4339023   |
| "Csp1"      | 4.3155758   | 4.285799    | 4.1192109   | 4.2530671   | 4.3468461   | 4.39638325  | 4.30453525  | 4.2972014   |
| "Csprs"     | 3.5254995   | 3.095664033 | 3.528054333 | 3.685164967 | 3.283541133 | 3.235906    | 3.730835533 | 3.429311933 |
| "Csrp1"     | 4.4880569   | 3.88653125  | 4.7720532   | 4.17388685  | 4.0762      | 3.6195142   | 4.12884715  | 4.12785975  |
| "Csrp2"     | 10.710245   | 9.145116    | 8.728172    | 8.855279    | 8.602898    | 9.098245    | 8.365769    | 8.860131    |
| "Csrp3"     | 8.164815    | 9.402343    | 9.429897    | 9.914599    | 9.015341    | 8.562316    | 9.185843    | 9.099069    |
| "Cst11"     | 2.6589372   | 2.6303809   | 2.5514517   | 2.5886836   | 2.718968    | 2.6529446   | 2.6312556   | 2.6452918   |
| "Cst12"     | 2.3695064   | 2.3357759   | 2.316394    | 2.3020382   | 2.35683     | 2.4782913   | 2.3581238   | 2.350796    |
| "Cst3"      | 11.77694    | 11.397736   | 11.7034     | 11.6536255  | 11.556301   | 11.650742   | 11.518375   | 11.507946   |
| "Cst8"      | 2.7753024   | 2.752235    | 2.6396146   | 2.685924    | 2.8244457   | 2.7900434   | 2.7487156   | 2.7841475   |
| "Cstb"      | 11.13623125 | 10.320182   | 11.480583   | 10.747806   | 10.25806825 | 10.3422055  | 10.5021845  | 10.332337   |
| "Cstf1"     | 5.566316    | 6.713763    | 6.084385    | 5.9302816   | 6.700191    | 6.3204627   | 6.3007336   | 5.7140102   |
| "Cstf2"     | 5.4519501   | 5.4873849   | 5.67192355  | 5.5565224   | 5.5846025   | 6.06879515  | 5.8069359   | 5.8109926   |
| "Cstf2t"    | 8.7134695   | 9.58584     | 9.536657    | 9.583334    | 9.600885    | 9.557211    | 9.934295    | 9.57205     |
| "Cstf3"     | 6.36991     | 6.9426966   | 7.3467674   | 7.109544    | 7.256592    | 7.203016    | 7.473773    | 7.573959    |
| "Ctage5"    | 9.98751     | 10.426829   | 9.763257    | 10.245948   | 10.40632    | 10.580516   | 10.224607   | 10.360869   |
| "Ctbp1"     | 9.065553    | 8.832141    | 9.035511    | 9.004378    | 8.977425    | 9.007027    | 9.134834    | 9.076885    |
| "Ctbp2"     | 4.9936715   | 4.2250425   | 5.14472185  | 4.9670753   | 4.7920823   | 4.9283342   | 5.05485465  | 4.589791    |
| "Ctbs"      | 6.4093018   | 5.9152958   | 6.61220455  | 6.57425635  | 6.30336435  | 6.0261785   | 6.2630377   | 6.3235595   |
| "Ctc"       | 8.2250865   | 8.373898    | 8.356398    | 8.2543035   | 8.5701915   | 8.5165695   | 8.45024     | 8.217094    |
| "Ctdnep1"   | 5.6777077   | 6.392715    | 5.8392973   | 6.0189476   | 6.2074146   | 5.2778435   | 5.533496    | 5.8390217   |
| "Ctdp1"     | 7.1728916   | 6.5713553   | 6.228139    | 6.2083406   | 6.4316626   | 6.4218664   | 6.156837    | 6.261034    |
| "Ctdsp1"    | 7.5390735   | 8.074216    | 7.95192     | 8.3492365   | 7.926931    | 7.884208    | 8.10833     | 8.259371    |
| "Ctdsp2"    | 7.279607    | 7.049448667 | 6.663617667 | 6.924213    | 6.541114567 | 6.8709695   | 6.7577764   | 7.303589467 |
| "Ctdspl"    | 6.166566    | 6.407808    | 6.7700515   | 6.5144777   | 6.664822    | 6.392498    | 6.7527413   | 6.74191     |
| "Ctf1"      | 2.3639889   | 2.611943    | 2.5548744   | 2.5580316   | 2.6196377   | 2.620553    | 3.060368    | 2.7956915   |
| "Ctff"      | 8.2708645   | 9.192503    | 9.247355    | 7.8061666   | 9.613116    | 10.74827    | 7.514468    | 7.3265877   |
| "Cth"       | 14.414622   | 12.802673   | 13.160916   | 13.785858   | 12.701465   | 13.227526   | 13.255029   | 12.968226   |
| "Ctla2a"    | 8.813157    | 7.57789165  | 7.721109    | 7.4269962   | 7.4385198   | 8.0092015   | 7.4185491   | 6.8243178   |
| "Ctla2b"    | 10.024927   | 8.447942    | 9.576204    | 8.931305    | 8.527399    | 8.577339    | 9.048186    | 8.403797    |
| "Ctla4"     | 2.501573    | 2.4687204   | 2.3971863   | 2.4454813   | 2.510732    | 2.4891453   | 2.4904957   | 2.5081391   |
| "Ctnna1"    | 8.533590867 | 8.459098    | 8.736435167 | 8.6971155   | 8.529179    | 8.499742067 | 8.734128733 | 8.661114133 |
| "Ctnna2"    | 2.799815    | 2.778602    | 2.6670868   | 2.7092168   | 2.8211174   | 3.204452    | 2.767466    | 2.8086147   |
| "Ctnna1"    | 5.6155443   | 4.666192    | 4.398882    | 3.8167925   | 3.8846116   | 4.359106    | 4.251803    | 4.2891607   |
| "Ctnnb1"    | 7.551513833 | 8.3816691   | 8.877273333 | 8.662210533 | 8.477370867 | 8.638219667 | 8.586220767 | 8.993464    |
| "Ctnnbip1"  | 4.0526882   | 4.25423235  | 4.30107055  | 4.0909485   | 4.3757192   | 4.2962904   | 4.33945075  | 4.72720055  |
| "Ctnnb1"    | 6.726369    | 7.5744076   | 6.590501    | 6.8469872   | 7.1885905   | 7.2792144   | 7.1840277   | 7.181684    |
| "Ctnnd1"    | 3.6861663   | 3.3041987   | 3.286303    | 3.3213782   | 3.2816427   | 3.2863734   | 3.5671048   | 3.3038902   |
| "Ctnnd2"    | 2.684825    | 2.6535118   | 2.6088872   | 2.6357234   | 2.6880283   | 2.6659205   | 2.6751127   | 2.668051    |
| "Ctns"      | 4.898608    | 4.9259443   | 4.7693114   | 4.827917    | 4.925885    | 4.9867544   | 4.937614    | 4.9383144   |
| "Ctps"      | 5.66164     | 6.754007    | 5.6074553   | 4.7734156   | 5.9070115   | 5.8441844   | 4.698633    | 4.791586    |
| "Ctps2"     | 7.2867403   | 7.5145535   | 7.89669     | 7.345464    | 7.208902    | 6.6945624   | 7.136599    | 7.3664036   |
| "Ctr9"      | 4.26000735  | 4.191822475 | 4.220535025 | 4.066936    | 4.247741125 | 4.090309075 | 4.195662375 | 4.339315725 |
| "Ctrb1"     | 2.3385043   | 2.3064313   | 2.2569697   | 2.3140638   | 2.3291585   | 2.3730347   | 2.3271255   | 2.3157144   |
| "Ctrl"      | 2.2149348   | 2.17579     | 2.3510542   | 2.7618804   | 2.2229433   | 2.191248    | 2.1944919   | 2.3230472   |
| "Cts3"      | 2.8737936   | 2.83519     | 2.7188864   | 2.7904413   | 2.906902    | 2.9198534   | 2.8358696   | 2.84746     |
| "Cts6"      | 2.410615    | 2.3866785   | 2.3073034   | 2.340959    | 2.4078155   | 2.4145484   | 2.398204    | 2.3983247   |
| "Cts7"      | 2.4230328   | 2.3899984   | 2.335895    | 2.3623476   | 2.4094577   | 2.4006405   | 2.4064507   | 2.3936696   |
| "Cts8"      | 2.6338096   | 2.615419    | 2.5477138   | 2.560824    | 2.6599252   | 2.660721    | 2.615062    | 2.6443963   |
| "Ctsa"      | 10.225092   | 9.814242    | 10.140305   | 10.140367   | 10.03989    | 10.11692    | 9.709446    | 9.828863    |
| "Ctsb"      | 9.5988834   | 8.4889838   | 9.825546425 | 9.6110835   | 9.46779775  | 8.981836825 | 9.56665605  | 9.016335625 |
| "Ctsc"      | 12.967236   | 11.191347   | 13.386145   | 12.5432625  | 12.244751   | 12.050893   | 12.669326   | 12.375946   |
| "Ctsd"      | 9.868692    | 9.369009    | 9.876982    | 9.60228     | 9.768591    | 9.566919    | 9.218091    | 9.296534    |
| "Ctse"      | 2.9289434   | 2.907231    | 2.9456944   | 2.8920054   | 3.2617111   | 3.0143502   | 2.932105    | 2.8977768   |
| "Ctsf"      | 7.063503    | 6.8879294   | 6.336411    | 6.7809906   | 7.005169    | 7.102429    | 6.617949    | 6.5536757   |
| "Ctsf"      | 2.5883768   | 2.5476098   | 3.1958263   | 2.5187364   | 2.5677264   | 3.9739354   | 2.567487    | 2.591607    |
| "Ctsh"      | 12.696853   | 12.380143   | 12.804087   | 12.567522   | 12.685949   | 12.438177   | 12.619654   | 12.441782   |
| "Ctsk"      | 2.4732955   | 2.5253754   | 2.394631    | 2.5155885   | 2.4913776   | 2.4976065   | 2.435956    | 2.502883    |
| "Ctsl"      | 14.009884   | 13.567588   | 13.061805   | 13.326719   | 13.359735   | 13.869358   | 12.578155   | 12.968229   |
| "Ctsm"      | 2.895929    | 2.874422    | 2.7988715   | 2.8178718   | 2.897896    | 2.8945115   | 2.8561008   | 2.8981528   |
| "Ctsq"      | 2.8547373   | 2.8234067   | 2.757729    | 2.7824254   | 2.8520746   | 2.8560076   | 2.8392782   | 2.8382487   |
| "Ctsr"      | 2.6056812   | 2.582103    | 2.5205026   | 2.5641499   | 2.605607    | 2.6071322   | 2.5878162   | 2.5968182   |
| "Cts"       | 12.593999   | 11.015671   | 12.570168   | 11.954749   | 11.404145   | 11.430627   | 11.595912   | 11.203404   |
| "Ctsz"      | 12.003762   | 11.78747867 | 12.08782833 | 11.88346733 | 11.971476   | 12.439883   | 11.51321617 | 11.62310867 |
| "Cttn"      | 5.8781189   | 5.8421209   | 5.88154204  | 5.80103968  | 5.81764508  | 5.59133874  | 5.74093898  | 5.7413555   |
| "Cttnbp2nl" | 4.670371    | 2.9218705   | 3.2438061   | 3.13979055  | 3.0015494   | 3.0755508   | 3.1041465   | 2.87959525  |
| "Ctu1"      | 6.020846    | 4.934855    | 4.989392    | 4.719949    | 5.2942843   | 5.5474067   | 5.0191875   | 4.956587    |
| "Cuedc1"    | 2.9657758   | 2.935732767 | 2.883283433 | 2.912067833 | 3.006609133 | 2.975746133 | 2.959337433 | 2.9493901   |
| "Cuedc2"    | 6.8024592   | 6.93341     | 7.150185    | 7.2335215   | 7.1739144   | 7.095715    | 7.1047955   | 6.9745226   |
| "Cul1"      | 9.296411    | 9.355075    | 9.199447    | 9.090782    | 9.127417    | 9.496789    | 9.36036     | 9.159023    |
| "Cul2"      | 6.40642165  | 6.5250061   | 6.1444862   | 6.2881283   | 6.485878    | 6.60402935  | 6.3767123   | 6.47703745  |
| "Cul3"      | 6.403481767 | 6.2896545   | 5.469012633 | 6.0437674   | 5.6559922   | 5.772558867 | 5.712629733 | 5.702770367 |
| "Cul4a"     | 8.7125025   | 8.939333    | 8.311861    | 8.66177     | 9.475272    | 9.052612    | 9.3191395   | 9.196804    |
| "Cul4b"     | 7.44409085  | 7.5828288   | 7.2771005   | 7.4145074   | 7.4459765   | 7.6383023   | 7.5653336   | 7.6848525   |
| "Cul7"      | 3.6884766   | 3.6330502   | 4.008414    | 3.6884203   | 3.6693802   | 3.5126886   | 3.860683    | 3.5164332   |
| "Cul9"      | 2.4030328   | 2.3665934   | 2.3356678   | 2.5286775   | 2.389411    | 2.5235863   | 2.3917718   | 2.3727748   |

|            |             |             |             |             |             |             |             |             |
|------------|-------------|-------------|-------------|-------------|-------------|-------------|-------------|-------------|
| "Cuta"     | 6.882853    | 7.5886106   | 7.585355    | 8.161764    | 7.657832    | 7.4077644   | 8.011096    | 8.090528    |
| "Cutc"     | 5.984269    | 6.2979155   | 6.468314    | 6.8723106   | 6.4319487   | 6.548421    | 6.7381144   | 7.062953    |
| "Cux1"     | 3.2545367   | 3.546938075 | 3.266225575 | 3.44824375  | 3.4805917   | 3.396045225 | 3.329057275 | 3.489921975 |
| "Cux2"     | 6.3971734   | 5.29244     | 5.2349467   | 5.6172523   | 5.415076    | 6.285096    | 5.368151    | 3.8409698   |
| "Cuzd1"    | 2.759101    | 2.7327178   | 2.7004113   | 2.6688967   | 2.774261    | 2.752709    | 2.7492774   | 2.745392    |
| "Cwc15"    | 9.112345    | 9.438342    | 9.053888    | 9.106014    | 9.131399    | 9.19403     | 9.061277    | 8.869451    |
| "Cwc22"    | 7.0547113   | 6.7260947   | 6.427794    | 6.678997    | 6.471918    | 6.743934    | 6.6469707   | 6.724119    |
| "Cwc27"    | 4.314329    | 4.482878    | 4.751876    | 4.4807396   | 4.448969    | 4.4192677   | 4.854815    | 4.35057     |
| "Cwf1911"  | 4.4411783   | 5.203712    | 4.89729     | 5.4991693   | 4.586091    | 4.183215    | 5.565981    | 5.044531    |
| "Cx3cl1"   | 2.4447459   | 2.44069115  | 2.4596369   | 2.3775861   | 2.4482882   | 2.4350059   | 2.4349625   | 2.44755055  |
| "Cx3cr1"   | 3.3954167   | 2.806902    | 3.9262426   | 3.336769    | 3.1094701   | 3.1333299   | 3.1243324   | 3.1104484   |
| "Cxadr"    | 5.306916533 | 4.2586634   | 4.442717233 | 4.0923636   | 4.0230454   | 4.258765433 | 4.2033185   | 4.5069707   |
| "Cxc11"    | 12.172369   | 7.560706    | 12.096901   | 12.396469   | 7.229857    | 5.418231    | 10.239771   | 10.413748   |
| "Cxc110"   | 9.862221    | 4.7752843   | 9.224445    | 10.176828   | 4.5487113   | 4.5336576   | 6.6897655   | 5.96872     |
| "Cxc111"   | 3.66622685  | 3.80604005  | 4.63606785  | 5.16519725  | 4.21954285  | 3.64501965  | 4.29765245  | 3.828729    |
| "Cxc112"   | 9.473103    | 9.346226    | 10.0101815  | 10.1312465  | 10.138388   | 9.527873    | 10.13674425 | 10.096068   |
| "Cxc113"   | 13.131632   | 7.7861425   | 9.18659     | 9.1245015   | 8.25234     | 8.5370385   | 7.8650653   | 6.9734242   |
| "Cxc114"   | 3.5538472   | 4.9275393   | 2.8000175   | 2.94295285  | 3.19555835  | 3.4606091   | 2.8202704   | 3.2559373   |
| "Cxc116"   | 7.5075065   | 5.88136465  | 7.710449    | 7.4464426   | 6.17839625  | 6.2382548   | 6.3433927   | 6.61389135  |
| "Cxc12"    | 8.602474    | 2.9864986   | 6.039885    | 4.2694273   | 2.9828157   | 2.9264977   | 2.9294946   | 2.9680884   |
| "Cxc15"    | 2.8282292   | 2.7998285   | 2.966719    | 2.7477014   | 2.9349055   | 2.8538578   | 2.7856426   | 2.826618    |
| "Cxc19"    | 8.9077015   | 7.0967464   | 10.580504   | 9.988732    | 8.02389     | 6.262597    | 9.640273    | 9.11928     |
| "Cxc22"    | 2.7696779   | 2.685539    | 2.8467822   | 2.6344905   | 2.7188962   | 2.699565    | 2.7164865   | 2.7017636   |
| "Cxc23"    | 2.4146898   | 2.406904    | 2.5775409   | 2.5661867   | 2.4513793   | 2.395119    | 2.4810848   | 2.6914046   |
| "Cxc24"    | 3.1925662   | 2.990671    | 4.2821455   | 2.8794262   | 2.962634    | 3.9393768   | 2.8264978   | 2.9084096   |
| "Cxc26"    | 3.0109758   | 3.1928303   | 3.66049985  | 3.65756575  | 3.34589695  | 3.34470965  | 4.02160165  | 3.36338065  |
| "Cxc27"    | 3.7351298   | 3.2575378   | 3.0521555   | 3.2411995   | 3.1919763   | 2.7660608   | 3.4775617   | 3.3344164   |
| "Cxx1a"    | 4.4264708   | 3.7925222   | 4.497421    | 3.8973782   | 3.784722    | 3.6076872   | 3.5375054   | 3.4203663   |
| "Cxx1c"    | 2.5349414   | 2.4560537   | 2.8640438   | 2.3951712   | 2.4657853   | 2.458189    | 2.444418    | 2.4544916   |
| "Cxxc1"    | 5.6700788   | 5.69446     | 5.3083506   | 5.531652    | 5.843296    | 5.722081    | 5.2043324   | 5.432822    |
| "Cxxc5"    | 6.1058891   | 7.0961073   | 6.8942447   | 7.5429785   | 7.39917755  | 7.4492833   | 7.714385    | 7.8984395   |
| "Cyb5"     | 13.502235   | 13.707738   | 13.702642   | 13.819831   | 13.721194   | 13.441174   | 13.952507   | 13.839052   |
| "Cyb561"   | 6.21052     | 4.7377386   | 6.8879576   | 5.990443    | 5.0565166   | 5.9073954   | 5.043811    | 5.84419     |
| "Cyb561d2" | 6.1009626   | 6.60391     | 6.8442144   | 6.459032    | 5.437127    | 6.4734993   | 6.0511594   | 6.340187    |
| "Cyb5b"    | 8.078004    | 8.335609167 | 9.489169667 | 9.472809667 | 8.3269375   | 7.499410567 | 9.457152    | 9.581911    |
| "Cyb5d1"   | 5.6694684   | 5.6135626   | 5.622188    | 5.967437    | 6.055162    | 5.8921585   | 6.2090926   | 6.0319057   |
| "Cyb5r1"   | 5.7368846   | 5.06771     | 6.9112225   | 6.577362    | 6.07337     | 7.197735    | 6.1729765   | 6.701904    |
| "Cyb5r3"   | 6.56324435  | 7.3346294   | 7.49820515  | 8.0240019   | 7.202318175 | 6.63884095  | 7.4751218   | 7.908369375 |
| "Cyb5r4"   | 9.283634    | 9.430902    | 9.592268    | 9.741381    | 9.100824    | 9.177789    | 9.379715    | 9.25795     |
| "Cyb5r1"   | 2.5212305   | 2.5021489   | 2.4011133   | 2.4417405   | 2.6096535   | 2.497479    | 2.5119452   | 2.6501868   |
| "Cyba"     | 9.507877    | 7.65808     | 9.731666    | 8.861067    | 8.166477    | 7.843453    | 8.502957    | 8.195338    |
| "Cybb"     | 6.7839627   | 4.1031914   | 6.9453864   | 5.9050784   | 5.3660026   | 4.2562666   | 5.4395127   | 5.0100403   |
| "Cyc1"     | 11.6007595  | 12.205125   | 11.827564   | 11.992228   | 12.176399   | 12.267008   | 12.293922   | 12.311862   |
| "Cycs"     | 11.61283267 | 11.99993333 | 11.63748067 | 11.4623     | 11.98442767 | 11.98973467 | 12.08851533 | 12.019016   |
| "Cyc2"     | 3.036589    | 3.0153058   | 2.9040463   | 2.9696147   | 3.0588622   | 3.0483127   | 2.9864948   | 3.056271    |
| "Cyfp1"    | 10.601545   | 10.376655   | 11.108214   | 10.928411   | 10.600328   | 10.452704   | 11.032259   | 10.720013   |
| "Cyfp2"    | 2.5254195   | 2.496219    | 3.1252723   | 2.4770727   | 2.5205157   | 2.5077016   | 2.610039    | 2.5077016   |
| "Cygb"     | 3.0483315   | 3.0100155   | 2.999241    | 3.4340475   | 3.0300987   | 2.848559    | 3.0377467   | 3.1550179   |
| "Cyhr1"    | 5.493105275 | 6.026248975 | 5.597919475 | 5.7877984   | 5.76958505  | 5.842283925 | 5.609878975 | 5.8126349   |
| "Cylc1"    | 3.1512876   | 3.1485972   | 2.939846    | 3.0466638   | 3.3290863   | 3.3200042   | 3.066461    | 3.204052    |
| "Cyp11a1"  | 2.4166832   | 2.3976336   | 2.3192792   | 2.3474722   | 2.4102073   | 2.403061    | 2.4055407   | 2.4003487   |
| "Cyp17a1"  | 11.344385   | 11.743056   | 10.977957   | 10.737141   | 11.947093   | 12.795233   | 9.91576     | 9.108585    |
| "Cyp1a1"   | 2.742063    | 2.7047963   | 2.707941    | 2.698946    | 2.7241669   | 2.542025    | 2.731742    | 3.5674553   |
| "Cyp1a2"   | 11.976261   | 11.766438   | 13.008582   | 12.353467   | 11.209204   | 9.448242    | 12.09244    | 12.380348   |
| "Cyp1b1"   | 2.67783225  | 3.14909245  | 2.54331635  | 2.56745555  | 2.64032175  | 2.62717995  | 2.6078112   | 2.61528065  |
| "Cyp24a1"  | 2.45408655  | 2.425449    | 2.3808204   | 2.4003116   | 2.45966615  | 2.4471709   | 2.4476682   | 2.43485095  |
| "Cyp26a1"  | 9.985359    | 8.976977    | 6.7271085   | 8.554353    | 6.1275897   | 8.646721    | 8.9999895   | 8.565519    |
| "Cyp27a1"  | 12.052322   | 12.411846   | 11.660084   | 12.143094   | 12.071548   | 12.208048   | 11.929201   | 12.05716    |
| "Cyp2a12"  | 10.635412   | 12.222174   | 12.306239   | 12.525023   | 12.371341   | 11.816149   | 12.386819   | 12.104497   |
| "Cyp2a4"   | 13.584205   | 12.8146925  | 14.683118   | 14.267498   | 13.346978   | 10.355285   | 13.642562   | 12.642109   |
| "Cyp2b10"  | 12.05047133 | 11.743793   | 8.530507333 | 7.840827    | 10.039153   | 11.27038067 | 9.290068    | 8.875539    |
| "Cyp2b13"  | 2.0038671   | 2.9206696   | 5.640281    | 6.0520215   | 7.9864063   | 2.6269226   | 10.788581   | 4.3663926   |
| "Cyp2b19"  | 2.4589992   | 2.4310148   | 2.352496    | 2.4086785   | 2.4560387   | 2.4551      | 2.4467483   | 2.4452386   |
| "Cyp2b9"   | 7.4391046   | 5.696536    | 9.039368    | 9.979774    | 10.392935   | 4.2203255   | 10.846955   | 8.855484    |
| "Cyp2c29"  | 12.187164   | 11.291743   | 11.957543   | 12.167807   | 12.841258   | 11.04229    | 12.8987665  | 13.189796   |
| "Cyp2c37"  | 11.562519   | 11.071514   | 10.878369   | 11.070841   | 12.127502   | 10.0491705  | 12.133739   | 11.8391285  |
| "Cyp2c38"  | 7.464876    | 6.1473293   | 5.728361    | 7.5125237   | 8.63099     | 7.1719856   | 8.392229    | 7.134198    |
| "Cyp2c39"  | 3.7577806   | 3.680126    | 3.701179    | 3.9343927   | 4.374057    | 3.724011    | 3.7485938   | 3.714135    |
| "Cyp2c44"  | 9.494909    | 10.108877   | 9.458694    | 10.9646     | 9.803186    | 9.350674    | 10.8760605  | 11.285854   |
| "Cyp2c50"  | 12.635897   | 13.330236   | 12.971561   | 13.674232   | 13.436754   | 12.581125   | 13.601732   | 13.938276   |
| "Cyp2c54"  | 10.586817   | 12.149233   | 10.197036   | 12.439856   | 11.259928   | 10.320016   | 10.99518    | 12.513858   |
| "Cyp2c55"  | 1.8131962   | 1.8335884   | 2.0875025   | 2.4744232   | 1.7840655   | 1.8514845   | 2.2037024   | 4.6484747   |
| "Cyp2c65"  | 2.5152605   | 2.4984212   | 2.4350638   | 2.4470816   | 2.5010738   | 2.4981842   | 2.4891067   | 2.498476    |
| "Cyp2c68"  | 13.444137   | 13.537697   | 13.176099   | 13.413402   | 13.856915   | 13.295573   | 13.619941   | 12.580212   |
| "Cyp2c70"  | 13.6780405  | 14.289934   | 14.018367   | 13.657731   | 13.030705   | 13.228869   | 12.832532   | 13.370258   |
| "Cyp2d10"  | 13.854932   | 14.366563   | 13.656985   | 14.102999   | 14.56698    | 14.259928   | 14.335947   | 14.386843   |
| "Cyp2d12"  | 3.45279     | 4.29646     | 3.1321373   | 5.538993    | 3.5596511   | 3.7021728   | 3.4826102   | 3.5382323   |
| "Cyp2d13"  | 4.08146965  | 5.77789355  | 6.17251945  | 7.68611385  | 7.59711215  | 6.71713335  | 7.921096    | 8.5245683   |
| "Cyp2d22"  | 9.0815835   | 10.124311   | 9.417781    | 9.832441    | 9.9338315   | 9.7613605   | 9.525402    | 9.7881775   |
| "Cyp2d26"  | 12.242048   | 12.128926   | 12.727118   | 12.535637   | 13.083809   | 12.294653   | 13.055176   | 12.858172   |
| "Cyp2d9"   | 9.676823    | 13.460873   | 9.215868    | 11.752318   | 10.512593   | 12.866611   | 8.395605    | 12.728246   |

|                 |             |             |             |             |             |             |             |             |
|-----------------|-------------|-------------|-------------|-------------|-------------|-------------|-------------|-------------|
| "Cyp2e1"        | 14.436787   | 14.900367   | 14.035781   | 14.638395   | 14.930345   | 14.783699   | 14.853504   | 14.827435   |
| "Cyp2f2"        | 11.152889   | 13.240077   | 12.867552   | 13.266571   | 10.463283   | 10.86635    | 9.90535     | 12.894589   |
| "Cyp2g1"        | 2.961825    | 3.1855047   | 5.5827923   | 5.8365808   | 3.2064033   | 2.4718168   | 3.600388    | 3.1868453   |
| "Cyp2j13"       | 2.3893652   | 2.3863826   | 2.3371432   | 2.3596578   | 2.3989844   | 2.392191    | 2.3825169   | 2.3846693   |
| "Cyp2j5"        | 9.4323345   | 10.3544355  | 10.7408625  | 11.3680295  | 10.7055425  | 10.831448   | 11.3695415  | 11.272497   |
| "Cyp2j6"        | 6.367504    | 7.2671776   | 7.1592565   | 7.3700147   | 7.239556    | 6.8779936   | 7.672926    | 7.7379413   |
| "Cyp2j9"        | 6.1439204   | 7.695952    | 5.101697    | 5.3729      | 7.064043    | 6.4505634   | 5.8896794   | 6.7488346   |
| "Cyp2s1"        | 2.161579    | 2.1286511   | 2.621328    | 2.1081812   | 2.1479244   | 2.1385703   | 2.1495657   | 2.1330662   |
| "Cyp39a1"       | 10.819117   | 9.934595    | 8.802835    | 7.871309    | 10.203363   | 10.980237   | 8.718039    | 8.8980255   |
| "Cyp3a11"       | 14.237191   | 13.440525   | 14.113291   | 14.251313   | 14.507878   | 14.524971   | 14.569636   | 14.489599   |
| "Cyp3a13"       | 12.35829    | 11.414614   | 10.951651   | 10.950167   | 11.432428   | 11.891244   | 10.54642    | 10.862158   |
| "Cyp3a16"       | 3.4544494   | 3.473617    | 6.9575515   | 3.4633179   | 4.950759    | 3.5567074   | 8.171906    | 3.520027    |
| "Cyp3a25"       | 12.392603   | 13.390422   | 12.929992   | 13.142659   | 13.370582   | 13.049858   | 13.343712   | 13.568859   |
| "Cyp3a41a"      | 11.365711   | 7.78523     | 13.736443   | 14.064572   | 14.143178   | 14.053062   | 14.786445   | 8.848586    |
| "Cyp3a44"       | 7.097575    | 4.7620177   | 7.679458    | 8.726787    | 9.4236145   | 8.539604    | 9.710136    | 7.7171617   |
| "Cyp46a1"       | 2.2319078   | 2.2124496   | 2.1844058   | 2.2793593   | 3.0381033   | 2.214644    | 2.2414262   | 2.2243366   |
| "Cyp4a10"       | 10.382945   | 14.170708   | 6.2831435   | 10.825322   | 14.104678   | 14.413926   | 13.128341   | 11.60216    |
| "Cyp4a12a"      | 2.5619545   | 8.782688    | 2.223655    | 2.5788972   | 2.5739543   | 4.192272    | 2.263336    | 5.9141097   |
| "Cyp4a14"       | 7.80897     | 13.542629   | 2.8975775   | 5.0892053   | 13.662675   | 14.513551   | 12.894161   | 10.046083   |
| "Cyp4a31"       | 2.7949626   | 4.8151693   | 2.6511304   | 2.710643    | 5.3638453   | 5.677424    | 2.9293299   | 2.899713    |
| "Cyp4b1"        | 9.332401    | 8.73771     | 9.488464    | 9.298069    | 9.2318125   | 9.768372    | 9.4599695   | 9.191271    |
| "Cyp4f13"       | 7.1107974   | 7.530042    | 6.738012    | 7.1507173   | 7.421572    | 7.6916537   | 7.2797503   | 7.711865    |
| "Cyp4f14"       | 9.247828    | 9.445621    | 10.150053   | 10.904045   | 9.647833    | 8.857355    | 10.1891165  | 10.346025   |
| "Cyp4f15"       | 7.6063337   | 8.142216    | 7.8266497   | 8.548551    | 8.810473    | 9.122121    | 9.20234     | 9.228542    |
| "Cyp4f16"       | 2.8114101   | 2.684645267 | 4.092590933 | 3.0092992   | 2.759103833 | 2.790506433 | 2.799703867 | 2.7096209   |
| "Cyp4f18"       | 3.6890733   | 3.160738    | 3.505091    | 3.2982476   | 3.197604    | 3.2248867   | 3.1491172   | 3.2205527   |
| "Cyp4v3"        | 11.45035675 | 12.1046265  | 11.5886925  | 12.543348   | 12.360299   | 11.969857   | 12.408162   | 12.3227865  |
| "Cyp51"         | 9.5349638   | 8.854169667 | 9.775189667 | 8.901221533 | 5.948293433 | 4.998459467 | 7.308860167 | 8.793852133 |
| "Cyp7a1"        | 5.59499175  | 9.1400123   | 8.423745    | 9.62503     | 9.123255    | 8.00183985  | 7.5418875   | 7.52385115  |
| "Cyp7b1"        | 12.9485585  | 14.488315   | 10.705878   | 13.613885   | 10.90933    | 14.009623   | 10.389986   | 13.9810005  |
| "Cyp8b1"        | 10.917766   | 11.9005995  | 9.652258    | 11.554356   | 11.199843   | 10.822419   | 8.567285    | 7.5191708   |
| "Cyr61"         | 4.1917005   | 5.039845    | 6.2118094   | 4.9488555   | 4.09450505  | 4.44510535  | 5.87719875  | 4.3109588   |
| "Cys1"          | 2.8360517   | 4.1637735   | 4.80237     | 6.0706244   | 4.9461784   | 4.940934    | 6.1724043   | 6.3595176   |
| "Cysltr1"       | 2.73548245  | 2.5276654   | 3.9356939   | 2.9532607   | 2.61749885  | 2.61409265  | 3.0476476   | 2.6079923   |
| "Cyth1"         | 9.318012    | 8.476699    | 8.318086    | 8.681738    | 8.504866    | 8.201347    | 7.9913206   | 8.448482    |
| "Cyth2"         | 7.3282638   | 7.244896    | 6.1229973   | 6.679755    | 6.542818    | 7.4931054   | 6.349058    | 6.72717     |
| "Cyth3"         | 4.40861095  | 3.7593646   | 4.18564525  | 3.8810705   | 3.9399689   | 3.95581375  | 3.84278895  | 3.8074186   |
| "Cytip"         | 9.3882065   | 6.0166783   | 7.03116125  | 5.7150435   | 6.0029066   | 5.97618415  | 5.66972175  | 4.8021952   |
| "Cyyr1"         | 2.6220722   | 2.588117    | 2.5085502   | 2.7687535   | 2.6074038   | 2.6290004   | 2.6073627   | 2.6368809   |
| "D030029J20Rik" | 7.107918    | 6.9929385   | 6.5520434   | 6.7982616   | 6.9768443   | 7.13654     | 6.9474826   | 6.456168    |
| "D030056L22Rik" | 6.91398985  | 6.8998075   | 6.87872735  | 7.21716715  | 6.98447415  | 7.21637735  | 7.39846965  | 7.34440435  |
| "D0H45114"      | 3.5473084   | 5.4423235   | 5.2422464   | 6.9979546   | 6.5460584   | 3.51775755  | 5.53267515  | 7.9585627   |
| "D0Kist5"       | 2.368938    | 2.3409812   | 2.2801437   | 2.2888882   | 2.3770652   | 2.3999262   | 2.3451676   | 2.395954    |
| "D10Jhu81e"     | 10.318224   | 10.166178   | 10.7929     | 10.833464   | 10.609438   | 10.051996   | 10.8568     | 10.728075   |
| "D10Wsu102e"    | 8.409192    | 6.893139    | 7.052853    | 7.0457544   | 6.609895    | 6.7697215   | 7.022485    | 7.3643      |
| "D10Wsu52e"     | 9.501267    | 9.48649575  | 9.653879    | 9.2820805   | 9.5559855   | 9.419841    | 9.335655    | 9.4428975   |
| "D11ErtD326e"   | 2.9508395   | 2.9552996   | 2.940559    | 2.9450214   | 3.0046577   | 2.9840329   | 2.9238021   | 3.0090315   |
| "D11Wsu99e"     | 6.724242833 | 6.268282467 | 5.917078567 | 6.062797667 | 6.471201067 | 6.4487675   | 6.156589233 | 6.269930633 |
| "D12ErtD123e"   | 5.3088384   | 4.6513677   | 6.427142    | 6.250475    | 5.958793    | 5.604106    | 4.8760986   | 5.832104    |
| "D12ErtD216e"   | 2.5306787   | 2.5038943   | 2.4532685   | 2.4747944   | 2.523847    | 2.5140414   | 2.5182834   | 2.507472    |
| "D13ErtD37e"    | 2.9093425   | 2.8751578   | 2.7362614   | 2.8450034   | 2.9241807   | 2.9230456   | 2.849658    | 2.920295    |
| "D15ErtD30e"    | 2.580522    | 2.5435555   | 2.5099711   | 2.5294793   | 2.5654304   | 2.6157854   | 2.570437    | 2.569373    |
| "D15ErtD50e"    | 3.2871282   | 3.2971873   | 3.192934    | 3.2209337   | 3.2793508   | 3.2758057   | 3.2105072   | 3.2996955   |
| "D15ErtD55e"    | 2.7799153   | 2.7563699   | 2.62603     | 2.7431661   | 2.79874965  | 2.80991875  | 2.739242    | 2.79195655  |
| "D15ErtD621e"   | 9.2390185   | 9.0948275   | 8.5428885   | 8.9398105   | 9.134576    | 8.7409095   | 9.167787    | 9.084103    |
| "D16ErtD472e"   | 9.249509333 | 7.008099067 | 6.394421    | 6.52282967  | 6.522188433 | 6.491460533 | 6.0336224   | 6.1629409   |
| "D16H22S680E"   | 8.639805    | 8.850973    | 8.424654    | 8.162382    | 8.683266    | 8.7722645   | 8.126551    | 7.6451387   |
| "D17892"        | 4.6234794   | 4.414356    | 4.4242907   | 4.4156027   | 4.6536026   | 3.9617922   | 4.430508    | 4.351938    |
| "D17H6S56E-5"   | 5.195181    | 3.8485728   | 6.41799175  | 4.5330924   | 4.4129034   | 4.0916569   | 4.50415275  | 4.01075105  |
| "D17Wsu104e"    | 7.9887006   | 8.524784667 | 8.0557438   | 7.8200345   | 8.748925    | 7.982285733 | 7.854789467 | 7.884888    |
| "D17Wsu92e"     | 8.461957    | 8.409249    | 7.9434037   | 8.337357    | 8.106622    | 8.297823    | 8.124828    | 8.208767    |
| "D18ErtD232e"   | 9.692857    | 5.9424834   | 5.1261945   | 5.724521    | 4.0932646   | 4.000292    | 5.8000236   | 4.465762    |
| "D18ErtD653e"   | 3.0840637   | 3.0203194   | 2.8959759   | 3.021647167 | 3.1422967   | 3.033073467 | 3.011206233 | 3.570783067 |
| "D19Bwg1357e"   | 5.89806635  | 6.122545    | 5.95694075  | 5.90067285  | 6.1491551   | 5.996345    | 5.8064228   | 5.84268495  |
| "D19Wsu162e"    | 8.253653233 | 8.187854833 | 7.03111867  | 7.290247733 | 7.5762651   | 7.869331733 | 7.158912433 | 7.165457333 |
| "D1ErtD622e"    | 8.067815    | 7.3981056   | 7.2950158   | 7.11597525  | 7.35894     | 7.56862925  | 7.07014965  | 7.13164805  |
| "D1ErtD75e"     | 3.9220715   | 4.5044727   | 4.2187843   | 4.5557284   | 5.0143304   | 4.5169983   | 4.1223764   | 4.774866    |
| "D1ErtD83e"     | 2.487824    | 2.4617186   | 2.3777428   | 2.441008    | 2.484777    | 2.4815102   | 2.4739408   | 2.4751692   |
| "D1Pas1"        | 2.7547774   | 2.7296796   | 2.660633    | 2.66474     | 2.758772    | 2.8308487   | 2.704162    | 2.8200638   |
| "D230025D16Rik" | 9.287918    | 9.2097025   | 8.4160145   | 8.6697895   | 9.285604    | 9.087075    | 8.579223    | 9.2833945   |
| "D2ErtD127e"    | 2.3746915   | 2.3394997   | 2.2552028   | 2.3330238   | 2.3782902   | 2.367616    | 2.351117    | 2.37484     |
| "D2ErtD239e"    | 2.4681766   | 2.4296427   | 2.3849583   | 2.4152386   | 2.4479632   | 2.4440465   | 2.440702    | 2.4360042   |
| "D2ErtD63e"     | 3.2520413   | 3.19782225  | 3.1015364   | 3.23513905  | 3.36890105  | 3.26438965  | 3.2212602   | 3.2705295   |
| "D2ErtD750e"    | 2.9020684   | 2.9060628   | 2.7590504   | 2.8339958   | 2.9730659   | 2.9484468   | 2.8794508   | 2.9443371   |
| "D2ErtD93e"     | 3.2274811   | 3.5428855   | 3.0833302   | 3.4920194   | 3.6905203   | 3.6016397   | 3.9835656   | 3.6694145   |
| "D2hgdh"        | 3.5999734   | 3.509448    | 3.6198533   | 3.6089764   | 3.6407933   | 3.2830894   | 3.9886863   | 3.9129426   |
| "D2Wsu81e"      | 4.8384438   | 5.0598507   | 4.89771     | 4.986846    | 4.8473067   | 5.1016083   | 4.8800116   | 4.5587068   |
| "D3Bwg0562e"    | 2.4877796   | 2.4620388   | 2.3777282   | 2.4133945   | 2.4845004   | 2.4814882   | 2.4738784   | 2.4751506   |
| "D3ErtD229e"    | 2.4824324   | 2.4568417   | 2.3755698   | 2.4176505   | 2.482227    | 2.4934661   | 2.4627812   | 2.4722922   |
| "D3ErtD246e"    | 2.8982792   | 2.8664203   | 2.7767577   | 2.8145835   | 2.8925931   | 2.915436    | 2.8871236   | 2.9149973   |
| "D430019H16Rik" | 5.0538387   | 4.911513    | 5.0088315   | 5.0039334   | 5.1116123   | 5.0308747   | 5.536055    | 4.9765882   |

|                 |             |             |             |             |             |             |             |             |
|-----------------|-------------|-------------|-------------|-------------|-------------|-------------|-------------|-------------|
| "D4Ertd117e"    | 2.9410414   | 3.1332344   | 2.98269545  | 3.0890632   | 3.151456    | 3.12564     | 3.117654    | 3.15731155  |
| "D4ErtD335e"    | 2.3888988   | 2.3637743   | 2.2900171   | 2.3510432   | 2.3889608   | 2.3795857   | 2.3920417   | 2.3738918   |
| "D4ErtD58e"     | 2.9782035   | 2.9974778   | 2.842599    | 2.887697    | 2.9953833   | 2.9669933   | 2.9350872   | 2.9722908   |
| "D4Wsu53e"      | 7.540445533 | 8.3357895   | 9.873236333 | 9.422515667 | 8.861503333 | 9.265561567 | 8.741347667 | 9.113641233 |
| "D530037H12Rik" | 5.3357286   | 4.9362693   | 5.417291    | 5.7802267   | 5.290804    | 4.9781203   | 5.8360896   | 5.365425    |
| "D5ErtD102e"    | 2.3950121   | 2.3711934   | 2.314575    | 2.329326    | 2.4055433   | 2.3799546   | 2.387976    | 2.42668     |
| "D630032N06Rik" | 3.115041    | 3.6933856   | 3.6232767   | 3.6266522   | 3.6872497   | 3.7312481   | 3.7258751   | 3.691168    |
| "D6ErtD160e"    | 2.8030891   | 2.7886057   | 2.6857672   | 2.724838    | 2.8320007   | 2.8329468   | 2.7799678   | 2.834145    |
| "D6Wsu116e"     | 7.1518579   | 6.8630949   | 7.0797777   | 7.089987075 | 6.736199575 | 6.89463435  | 7.094268625 | 6.9611147   |
| "D6Wsu163e"     | 5.9638753   | 6.006006    | 7.1064653   | 6.48094     | 6.5336733   | 7.012226    | 6.999405    | 5.9967976   |
| "D730039F16Rik" | 6.202731    | 6.0542912   | 7.5764885   | 7.6333866   | 7.0492992   | 6.8119206   | 6.838869    | 7.573432    |
| "D730048I06Rik" | 2.436854    | 2.4099963   | 2.340173    | 2.380938    | 2.4411259   | 2.4206736   | 2.4268818   | 2.41892     |
| "D7Bwg0826e"    | 2.877454    | 2.4114137   | 2.3338096   | 2.3732514   | 2.446213    | 2.4286091   | 2.4228582   | 2.4241476   |
| "D7ErtD183e"    | 7.258331    | 3.7200282   | 3.9044766   | 3.7019768   | 3.4814906   | 3.9811826   | 3.7135797   | 3.3302562   |
| "D8ErtD107e"    | 2.6817665   | 2.6620374   | 2.6227038   | 2.5992084   | 2.7329154   | 2.7110019   | 2.6481295   | 2.6666284   |
| "D8ErtD28e"     | 2.5572107   | 2.5307095   | 2.4410105   | 2.4797633   | 2.5550938   | 2.5803096   | 2.5401163   | 2.572742    |
| "D8ErtD738e"    | 7.46251715  | 7.55500085  | 7.25647575  | 7.23321785  | 7.3369705   | 7.3999435   | 7.252557    | 7.297902    |
| "D930014E17Rik" | 8.135997    | 8.884182    | 8.132625    | 8.206074    | 8.466777    | 8.369929    | 8.263163    | 8.273445    |
| "D930015E06Rik" | 6.688935    | 7.573066    | 7.5774264   | 8.555847    | 8.51373     | 7.2988815   | 8.26322     | 8.505975    |
| "D930016D06Rik" | 5.11487915  | 5.4141962   | 5.05213025  | 5.1361225   | 5.5359085   | 6.25377755  | 5.901582    | 6.0492815   |
| "D930048N14Rik" | 2.526842    | 2.496372    | 2.4631124   | 2.4496956   | 2.5256908   | 2.5221474   | 2.5097876   | 2.5169897   |
| "D9ErtD26e"     | 2.5087662   | 2.4756167   | 2.4102833   | 2.4415636   | 2.620608    | 2.551394    | 2.4969501   | 2.5109842   |
| "D9ErtD306e"    | 3.484681    | 3.1753092   | 3.2131476   | 3.078276    | 3.1987324   | 3.1939185   | 2.8111386   | 3.2968082   |
| "Dab1"          | 2.567380725 | 2.5342053   | 2.4831866   | 2.50650215  | 2.556495075 | 2.576598425 | 2.5393671   | 2.5507093   |
| "Dab2"          | 5.834703633 | 5.44512267  | 5.618707967 | 5.524145033 | 4.999651233 | 4.989858233 | 5.479455867 | 5.031881133 |
| "Dab2ip"        | 6.0664377   | 5.916423    | 6.1240454   | 6.2212005   | 6.0860734   | 6.490365    | 6.6558035   | 6.3103456   |
| "Dach1"         | 2.53106065  | 2.5022012   | 2.4599631   | 2.46463885  | 2.52865625  | 2.523707    | 2.5165776   | 2.57634745  |
| "Dach2"         | 2.505095    | 2.472215    | 2.4122827   | 2.4498937   | 2.5072038   | 2.4898276   | 2.4935184   | 2.4902825   |
| "Dact1"         | 6.272562    | 6.918398    | 5.3909445   | 5.7743926   | 5.40291     | 5.8735476   | 5.2218575   | 6.324389    |
| "Dad1"          | 10.493132   | 10.973225   | 10.886545   | 10.747027   | 10.72791675 | 10.702356   | 10.7145475  | 10.67760625 |
| "Daf2"          | 3.0575051   | 3.0547948   | 2.883901    | 2.94854     | 3.1768904   | 3.1156976   | 3.0106313   | 3.198408    |
| "Dag1"          | 7.24030515  | 7.49582775  | 7.589812325 | 7.544618075 | 7.5593642   | 7.47882485  | 7.6781834   | 7.631709325 |
| "Dag1b"         | 6.7882514   | 7.5136223   | 7.03566     | 7.6299043   | 7.2513533   | 7.3685937   | 7.3012714   | 7.598844    |
| "Dak"           | 6.228463    | 8.985587    | 7.096247    | 7.6381726   | 10.235661   | 8.35017     | 7.640193    | 7.946953    |
| "Dalrd3"        | 6.6931734   | 6.7395983   | 6.513759    | 6.7890472   | 6.810369    | 6.8745484   | 6.8843827   | 6.7724204   |
| "Dap"           | 11.7525515  | 11.191537   | 11.672764   | 11.7611195  | 11.141696   | 10.7019625  | 10.8990185  | 10.775743   |
| "Dap3"          | 8.167463    | 8.747862    | 8.8337965   | 9.24168     | 8.589098    | 8.592757    | 8.757324    | 9.001232    |
| "Dapk1"         | 5.94829465  | 4.92599155  | 4.855275    | 4.9239135   | 5.05668685  | 5.29666285  | 5.204728    | 4.93877635  |
| "Dapk2"         | 3.7042353   | 4.8292975   | 4.529977    | 5.082338    | 5.4444065   | 5.1828437   | 5.6467338   | 5.531633    |
| "Dapk3"         | 2.3656495   | 2.38344     | 2.307346    | 2.3135228   | 2.350344    | 2.3476205   | 2.3549755   | 2.3748798   |
| "Dapp1"         | 2.8584172   | 2.71365535  | 2.909206    | 2.7154945   | 2.73936245  | 2.75245475  | 2.8540355   | 2.73943365  |
| "Darc"          | 1.7951362   | 1.7571077   | 3.1507483   | 1.784838    | 1.7780296   | 1.7447469   | 2.3144515   | 1.7625444   |
| "Dars"          | 9.678566    | 9.7501955   | 9.543324    | 9.784368    | 9.79606     | 9.822335    | 10.025276   | 9.800305    |
| "Daxx"          | 6.764215    | 6.167538    | 6.864989    | 6.2462296   | 5.987195    | 6.31197     | 5.9544725   | 5.989723    |
| "Dazap1"        | 8.067682    | 8.637465    | 8.343724    | 8.49488     | 8.733622    | 8.318042    | 8.515229    | 8.863158    |
| "Dazap2"        | 12.0255     | 12.106233   | 11.82064    | 11.748289   | 11.830589   | 11.569659   | 11.690419   | 11.737552   |
| "Dbc1"          | 2.9478507   | 2.9762423   | 2.8538117   | 2.919249    | 2.9536867   | 2.9519482   | 2.9074526   | 2.9498236   |
| "Dbf4"          | 4.1890872   | 3.262354    | 3.6002133   | 3.62544585  | 3.4717156   | 4.0243127   | 4.09835785  | 4.34078985  |
| "Dbh"           | 3.0656352   | 3.034818    | 2.9107869   | 3.0069983   | 3.3591957   | 3.0496988   | 3.0489933   | 3.1856596   |
| "Dbi"           | 12.574141   | 12.82686525 | 12.95656475 | 12.7737945  | 12.80454625 | 12.579625   | 13.407465   | 13.32276213 |
| "Dbil5"         | 2.6294061   | 2.5909117   | 2.5419195   | 2.56640755  | 2.6213355   | 2.608183    | 2.60267315  | 2.70671875  |
| "Dbn1"          | 2.4907503   | 2.4664326   | 2.435743    | 2.4222012   | 2.4859185   | 2.560916    | 2.47955     | 2.4705896   |
| "Dbndd2"        | 5.1409993   | 4.947621    | 6.208943    | 5.787533    | 4.9190207   | 5.0599475   | 5.2901073   | 5.137338    |
| "Dbnl"          | 5.411618    | 4.97748     | 6.481097    | 6.0157847   | 4.6899314   | 5.2446804   | 5.9697695   | 5.2826843   |
| "Dbp"           | 4.9823763   | 9.34159425  | 8.33012235  | 10.708797   | 9.56104265  | 8.4180647   | 9.00165835  | 11.1908515  |
| "Dbr1"          | 7.095567    | 6.90289     | 6.8071833   | 7.120519    | 6.9465184   | 7.076686    | 7.3248706   | 7.2840075   |
| "Dbt"           | 10.140085   | 9.683301    | 10.121377   | 9.939815    | 9.4318      | 9.495594    | 9.972813    | 9.8530855   |
| "Dcaf11"        | 11.157346   | 10.882218   | 11.360566   | 11.5415125  | 10.494844   | 10.8991745  | 11.2362215  | 11.1618815  |
| "Dcaf12"        | 5.694087    | 6.212344    | 6.1850204   | 6.513652    | 6.5599546   | 6.640794    | 6.225856    | 6.6728544   |
| "Dcaf13"        | 9.884062    | 9.839635    | 9.16894     | 9.165265    | 9.4539795   | 9.74041     | 8.988915    | 9.439596    |
| "Dcaf15"        | 4.1944385   | 3.727003    | 3.8315933   | 3.6968098   | 3.7401605   | 3.7389593   | 3.8064268   | 3.7562294   |
| "Dcaf4"         | 3.5646875   | 3.682968    | 3.578211    | 3.2956574   | 2.7848516   | 2.8522444   | 3.805902    | 3.32232     |
| "Dcaf8"         | 5.921093    | 6.1200685   | 5.89510525  | 6.21510585  | 6.1076841   | 6.132956    | 6.2965835   | 6.3883772   |
| "Dcblid1"       | 4.84024635  | 4.3114278   | 4.713496    | 4.10948015  | 4.24414035  | 4.66237065  | 4.425773    | 4.1380658   |
| "Dck"           | 5.350330267 | 4.780637567 | 5.9432665   | 5.549991567 | 5.123001433 | 5.042753367 | 5.757786767 | 5.412206867 |
| "Dclk1"         | 2.75695126  | 2.73509576  | 2.63599786  | 2.67778484  | 2.76952014  | 2.7651269   | 2.73300328  | 2.76936056  |
| "Dclre1a"       | 4.40654435  | 4.6233667   | 4.3042308   | 5.16297815  | 4.74131     | 4.50433825  | 4.62903015  | 4.8401166   |
| "Dclre1b"       | 3.0083714   | 3.8896794   | 2.9067328   | 2.518798    | 2.9356225   | 3.6946282   | 2.7300186   | 2.9006252   |
| "Dcn"           | 12.640169   | 12.08747    | 12.527314   | 12.051142   | 12.36887    | 12.428403   | 12.317913   | 11.832943   |
| "Dcp1a"         | 3.805055    | 3.719552    | 3.77986515  | 3.8518905   | 3.87525735  | 3.79085895  | 3.79602735  | 3.79039585  |
| "Dcpp1"         | 2.7322204   | 2.7072681   | 2.64787275  | 2.67214435  | 2.7372911   | 2.7382033   | 2.6748519   | 2.7278692   |
| "Dcpp3"         | 2.71371     | 2.69808     | 2.6614718   | 2.68808     | 2.701405    | 2.7063997   | 2.7031484   | 2.7065253   |
| "Dcps"          | 4.794984    | 5.1090326   | 5.0513465   | 5.181528    | 5.16132385  | 5.30431775  | 5.10974385  | 5.4236401   |
| "Dct"           | 8.711118    | 10.654584   | 8.687443    | 10.895042   | 9.691115    | 7.758364    | 9.795837    | 8.73784     |
| "Dctn1"         | 5.2442785   | 5.9580269   | 5.23896825  | 5.76945385  | 5.740213    | 5.86667135  | 5.26502245  | 5.19994055  |
| "Dctn2"         | 9.365769    | 9.899881    | 9.301745    | 9.652546    | 9.812566    | 9.704538    | 9.631521    | 9.7045965   |
| "Dctn3"         | 9.996097    | 10.282719   | 9.6706      | 10.119459   | 9.920302    | 10.318997   | 9.76495     | 9.828773    |
| "Dctn4"         | 5.03060795  | 4.908135575 | 4.652731925 | 4.864299    | 4.752489575 | 4.928577225 | 4.918959975 | 4.9429769   |
| "Dctn5"         | 6.7689385   | 6.071661    | 7.300959    | 6.7531676   | 6.4704137   | 6.248583    | 6.997448    | 6.495922    |
| "Dctn6"         | 8.7824605   | 8.7711415   | 9.0530055   | 8.77574     | 8.609096    | 8.50982     | 9.001458    | 8.7848175   |
| "Dctpp1"        | 7.7299976   | 8.595802    | 7.4720154   | 8.26322     | 7.9260173   | 8.542357    | 8.026993    | 8.497526    |

|             |             |             |             |             |             |             |             |             |
|-------------|-------------|-------------|-------------|-------------|-------------|-------------|-------------|-------------|
| "Dcun1d1"   | 6.55998028  | 6.4751542   | 6.34043568  | 6.533594    | 6.42786508  | 6.30430928  | 6.52877768  | 6.33401592  |
| "Dcun1d5"   | 6.119755    | 6.0257195   | 5.8681849   | 5.89042525  | 5.9938218   | 6.18288365  | 5.9668323   | 5.991303    |
| "Dcxr"      | 9.90397     | 10.874946   | 10.612108   | 10.646509   | 10.758436   | 10.267873   | 10.407367   | 10.758571   |
| "Dda1"      | 6.520005067 | 5.789443933 | 5.0154509   | 5.191583033 | 5.267573133 | 5.532434667 | 5.1548331   | 5.170827367 |
| "Ddah2"     | 2.869077    | 2.8309734   | 2.8225098   | 2.897187    | 2.869599    | 2.830606    | 3.1811504   | 3.1089108   |
| "Ddb1"      | 8.482208    | 9.303167    | 8.769476    | 8.6501255   | 9.455621    | 9.097764    | 8.595698    | 8.814692    |
| "Ddb2"      | 5.2731963   | 6.0881729   | 5.9325205   | 6.1958398   | 5.84526685  | 6.3431219   | 6.06660425  | 6.0259555   |
| "Ddc"       | 10.077302   | 9.713395    | 9.579207    | 8.969148    | 9.309122    | 9.728226    | 9.977981    | 8.485176    |
| "Ddhd1"     | 3.88846875  | 3.8008236   | 4.2711788   | 3.88195695  | 3.8507855   | 3.8603676   | 3.8393035   | 3.7569531   |
| "Ddhd2"     | 7.141255    | 9.031348    | 7.5684867   | 8.433127    | 9.833938    | 9.292314    | 8.154484    | 8.999173    |
| "Ddi2"      | 7.766416    | 7.6814146   | 7.398829    | 7.478863    | 7.743348    | 7.465281    | 7.567698    | 7.564984    |
| "Ddit3"     | 5.5916495   | 5.262393    | 5.4951735   | 5.7044024   | 6.4239783   | 7.3955526   | 5.7497754   | 5.9781995   |
| "Ddit4"     | 12.552324   | 11.419613   | 9.440683    | 7.0178113   | 9.815105    | 11.586043   | 5.979017    | 5.3322496   |
| "Ddit4l"    | 2.371901    | 2.3488617   | 2.3204777   | 2.3157103   | 2.3706017   | 2.3648443   | 2.3691182   | 2.3562145   |
| "Ddo"       | 4.375459    | 4.4682336   | 4.4290566   | 4.9964623   | 4.8815126   | 4.541277    | 5.139703    | 4.5536375   |
| "Ddost"     | 5.2827958   | 5.579699    | 5.94809875  | 5.73773885  | 5.80826765  | 5.53427775  | 5.7265761   | 5.8883769   |
| "Ddr1"      | 3.949531457 | 3.6408848   | 3.791858014 | 3.637938529 | 3.703651843 | 3.748233629 | 3.607039243 | 3.708951171 |
| "Ddr2"      | 2.9034138   | 2.8882134   | 2.8543196   | 2.871674    | 2.8989513   | 2.9143171   | 2.8880296   | 2.9342487   |
| "Ddrg1"     | 10.636776   | 10.773142   | 10.319004   | 10.58699    | 10.69627    | 10.614996   | 10.786921   | 10.696075   |
| "Ddt"       | 12.186885   | 12.881974   | 12.4159775  | 12.7498665  | 12.669274   | 12.992509   | 13.026519   | 12.898727   |
| "Ddx1"      | 9.533439    | 10.072472   | 9.6842165   | 9.427428    | 10.047441   | 9.928273    | 9.592575    | 9.642343    |
| "Ddx10"     | 6.38027985  | 5.88707325  | 5.8878345   | 5.7776898   | 5.8987      | 6.05831165  | 5.7164388   | 5.95592665  |
| "Ddx17"     | 7.935797233 | 7.6375576   | 7.868921667 | 7.782202667 | 7.877706    | 8.245247767 | 8.1167956   | 8.140706067 |
| "Ddx18"     | 7.527176    | 7.786099    | 7.5200088   | 7.33190575  | 7.42629215  | 7.78029325  | 7.4567427   | 7.30942155  |
| "Ddx19a"    | 6.2370738   | 6.20802385  | 5.9587734   | 5.8470006   | 5.9902925   | 6.01330445  | 5.53813     | 6.08237285  |
| "Ddx19b"    | 4.40940775  | 4.333571    | 4.10914715  | 3.93099165  | 4.49592215  | 4.44580925  | 4.4212123   | 4.66405965  |
| "Ddx20"     | 7.273952    | 6.9668026   | 6.29708     | 6.2090864   | 6.6622977   | 6.9529924   | 6.568904    | 6.707985    |
| "Ddx21"     | 7.6407667   | 7.623642    | 6.4965953   | 5.9969168   | 7.049559    | 7.54308165  | 6.06921175  | 6.35284215  |
| "Ddx24"     | 8.293043    | 8.248835    | 7.9902043   | 7.840739    | 7.8191614   | 7.8488784   | 7.5087633   | 7.761591    |
| "Ddx26b"    | 6.299699    | 5.2346606   | 6.556793    | 5.834268    | 5.756917    | 5.7140846   | 5.877153    | 5.300923    |
| "Ddx27"     | 5.1533926   | 4.97775205  | 4.5712608   | 4.5631787   | 4.97411035  | 5.0306504   | 4.6156335   | 4.8742784   |
| "Ddx39"     | 8.1576441   | 8.09459975  | 8.695573525 | 7.625408875 | 8.10609525  | 8.0203235   | 8.460488625 | 8.183755075 |
| "Ddx39b"    | 6.392843    | 6.469079467 | 6.4999914   | 6.252926833 | 6.367874333 | 6.311360667 | 6.497437333 | 6.424254667 |
| "Ddx3x"     | 12.0534345  | 10.80174733 | 11.062572   | 10.511889   | 11.23461167 | 10.764778   | 10.94618883 | 10.848101   |
| "Ddx3y"     | 3.082402667 | 9.625458    | 3.084869267 | 9.092642333 | 3.1575244   | 9.194878667 | 3.036170733 | 9.455628    |
| "Ddx4"      | 2.818864    | 2.7964447   | 2.6919138   | 2.728176    | 2.8719838   | 2.9229412   | 2.7888188   | 2.8737562   |
| "Ddx41"     | 5.238578    | 5.256887    | 5.189053    | 5.1654215   | 5.64729     | 5.205089    | 5.2263656   | 5.206887    |
| "Ddx42"     | 7.6668453   | 7.5878544   | 7.1522465   | 7.276285    | 7.258157    | 7.450084    | 7.363053    | 7.2109175   |
| "Ddx46"     | 4.8002327   | 5.140684667 | 4.870030867 | 5.000883    | 5.5307829   | 4.8465071   | 4.992381567 | 5.055078533 |
| "Ddx47"     | 4.762579667 | 4.702655333 | 4.5129755   | 4.625911467 | 4.852774733 | 4.8486712   | 4.6278549   | 4.736401767 |
| "Ddx49"     | 6.1929784   | 6.444563    | 6.1486816   | 6.0045347   | 6.614752    | 6.139936    | 6.001135    | 6.184084    |
| "Ddx5"      | 10.28824664 | 9.50581606  | 9.45506716  | 9.4798972   | 9.63129892  | 9.6774792   | 9.94466654  | 9.78816218  |
| "Ddx50"     | 9.749668    | 10.1185875  | 9.544497    | 9.77653     | 10.278519   | 10.212902   | 9.897774    | 9.861801    |
| "Ddx51"     | 4.511801    | 4.718197    | 4.8883257   | 4.315125    | 4.74032     | 5.26702     | 4.510252    | 4.582341    |
| "Ddx52"     | 7.0877109   | 7.0901465   | 6.53963475  | 6.72480375  | 6.68886305  | 7.2655033   | 6.6220008   | 6.8844218   |
| "Ddx54"     | 8.419849    | 8.41880035  | 8.06945735  | 7.914404    | 8.084596    | 8.236898    | 7.8536675   | 8.0652432   |
| "Ddx56"     | 5.951789    | 6.530783    | 6.2930913   | 5.7453585   | 5.918942    | 6.4373565   | 5.9776244   | 5.714426    |
| "Ddx59"     | 4.735393    | 4.7828784   | 5.079812    | 5.6560426   | 5.016865    | 5.031706    | 5.355536    | 5.333571    |
| "Ddx6"      | 9.48797     | 9.594863667 | 9.542093    | 9.869004    | 9.999359667 | 9.908649    | 9.544945667 | 9.8054405   |
| "Ddx60"     | 5.3286057   | 4.358453    | 7.3674917   | 6.76223     | 5.032694    | 3.2024593   | 5.8942127   | 5.4124947   |
| "Deaf1"     | 3.5326605   | 3.700653    | 3.620825    | 4.0641694   | 4.0188      | 3.804124    | 3.8165812   | 3.8675818   |
| "Deb1"      | 9.678133    | 9.863993    | 9.102699    | 9.322941    | 9.860986    | 9.688167    | 8.907023    | 9.406006    |
| "Decr1"     | 8.282141    | 9.9720045   | 8.6779213   | 9.60388965  | 10.21978    | 10.173211   | 10.2320415  | 10.0874755  |
| "Decr2"     | 7.777948    | 8.972025    | 8.109621    | 8.624944    | 8.94657     | 8.064086    | 8.9814005   | 9.063446    |
| "Dedd"      | 5.162782467 | 5.3869759   | 5.227586867 | 5.408992133 | 5.088444767 | 5.225529233 | 5.283208167 | 5.3082897   |
| "Dedd2"     | 6.603473    | 6.7067122   | 6.346597    | 7.4122725   | 6.3733673   | 6.559612    | 6.0098906   | 7.264695    |
| "Def8"      | 3.8453662   | 5.660282    | 4.92572     | 5.21344     | 5.704008    | 5.5448484   | 5.128378    | 4.945483    |
| "Defa-rs1"  | 2.711       | 2.6833858   | 2.6588342   | 2.6731918   | 2.7093163   | 2.7156916   | 2.683497    | 2.7055244   |
| "Defa-rs10" | 2.6709843   | 2.644885    | 2.5751305   | 2.633211    | 2.665861    | 2.7252183   | 2.6542501   | 2.6554222   |
| "Defa-rs12" | 2.762533    | 2.7586749   | 2.7958272   | 2.7476766   | 2.7779832   | 2.769696    | 2.7330947   | 2.7723765   |
| "Defa-rs2"  | 2.4720116   | 2.4503586   | 2.4242446   | 2.436834    | 2.462143    | 2.538626    | 2.3133538   | 2.4510362   |
| "Defa1"     | 3.415394    | 3.4140327   | 3.1882074   | 3.281443    | 3.5267699   | 3.4839358   | 3.3765862   | 3.634045    |
| "Defa3"     | 2.4373832   | 2.4181676   | 2.3340182   | 2.3685532   | 2.4385533   | 2.4367707   | 2.4261355   | 2.4249172   |
| "Defa4"     | 2.7337904   | 2.7342482   | 2.5942755   | 2.6486266   | 2.8163815   | 3.0547345   | 2.6825404   | 2.7818289   |
| "Defa5"     | 2.504609    | 2.4785209   | 2.406567    | 2.4290276   | 2.504924    | 2.5074646   | 2.4892714   | 2.5032504   |
| "Defb1"     | 6.8517117   | 7.2681666   | 8.1249355   | 7.11925575  | 7.1989434   | 6.7675217   | 6.63280315  | 5.36994535  |
| "Defb11"    | 2.621925    | 2.5856943   | 2.562214    | 2.5532892   | 2.6448607   | 2.6125147   | 2.6046598   | 2.6233315   |
| "Defb15"    | 3.1261497   | 3.0918195   | 2.8930943   | 3.0665631   | 3.1116817   | 3.10495     | 3.0150251   | 3.0971909   |
| "Defb2"     | 2.4009907   | 2.3709102   | 2.3169942   | 2.34266     | 2.39384     | 2.3889923   | 2.3859618   | 2.3827302   |
| "Defb3"     | 2.7694645   | 2.7557135   | 2.6890407   | 2.6714406   | 2.7930362   | 2.804462    | 2.748578    | 2.8028693   |
| "Defb4"     | 2.8638978   | 2.8673596   | 2.7131124   | 2.777751    | 2.8890162   | 2.897956    | 2.8403676   | 2.901234    |
| "Defb5"     | 2.7234514   | 2.6988063   | 2.6153464   | 2.6513164   | 2.7229998   | 2.7225235   | 2.7114394   | 2.7183871   |
| "Defb6"     | 2.8731      | 2.843361    | 2.7505727   | 2.7679324   | 2.868493    | 2.8908305   | 2.8703914   | 2.8686094   |
| "Defb7"     | 2.7775502   | 2.7533565   | 2.6357994   | 2.7127666   | 2.7905242   | 2.788527    | 2.7469473   | 2.7894258   |
| "Defb8"     | 2.3622444   | 2.3293698   | 2.2772784   | 2.2908685   | 2.350796    | 2.3456247   | 2.3225708   | 2.388618    |
| "Defb9"     | 2.8621612   | 2.8390212   | 2.7179694   | 2.7558284   | 2.8735974   | 2.9181387   | 2.8108313   | 2.9591985   |
| "Degs1"     | 10.4923535  | 10.70233775 | 11.0543605  | 10.6854325  | 10.1562815  | 10.6312045  | 10.3822085  | 10.201504   |
| "Dek"       | 11.047092   | 10.992718   | 10.730417   | 10.625732   | 10.805101   | 10.916632   | 10.841349   | 10.938422   |
| "Dennd1a"   | 5.951984    | 5.866108    | 5.841078    | 5.8089685   | 5.8896155   | 5.877211    | 5.829251    | 5.8554277   |
| "Dennd2d"   | 3.4206945   | 3.4071133   | 4.19048965  | 3.9262986   | 3.5029135   | 3.37837105  | 3.87548505  | 3.5411285   |
| "Dennd4b"   | 5.0370045   | 4.703871    | 5.536503    | 5.709432    | 5.3723493   | 5.557867    | 5.261971    | 5.0961275   |

|           |             |             |             |             |             |             |             |             |
|-----------|-------------|-------------|-------------|-------------|-------------|-------------|-------------|-------------|
| "Dennd4c" | 8.310459    | 8.31716     | 8.4030695   | 8.615933    | 8.381266    | 8.740433    | 8.815057    | 8.712523    |
| "Dennd5a" | 9.4235115   | 8.591026    | 8.855725    | 8.779694    | 8.624958    | 8.674606    | 8.686716    | 8.623235    |
| "Denr"    | 7.794672    | 8.20963935  | 7.02804215  | 7.044927    | 6.94142     | 7.285671    | 6.94524165  | 6.8784028   |
| "Dep1"    | 2.4194157   | 2.3880625   | 2.3208365   | 2.3340592   | 2.4142365   | 2.425083    | 2.4034524   | 2.4306443   |
| "Depdc1a" | 2.848125    | 2.848701    | 2.706323    | 2.7625566   | 2.8965108   | 2.8965387   | 2.809787    | 2.8833797   |
| "Depdc7"  | 7.488517    | 8.490213    | 9.252438    | 9.596795    | 8.838622    | 8.659381    | 9.153926    | 9.714242    |
| "Deptor"  | 8.3408391   | 8.861482767 | 8.015697567 | 8.731687667 | 8.651460833 | 8.608268567 | 8.468874467 | 9.253213667 |
| "Dera"    | 8.317178    | 9.3845      | 9.524175    | 10.102199   | 9.724467    | 8.916197    | 9.991593    | 10.029673   |
| "Der11"   | 9.3330635   | 9.57415025  | 9.408701    | 9.32427175  | 9.61071325  | 9.258105625 | 9.22826075  | 9.34591275  |
| "Der12"   | 8.5981965   | 9.2264657   | 9.46889     | 9.57433585  | 9.7896455   | 9.16873     | 9.6861692   | 9.91726525  |
| "Der13"   | 2.5331697   | 2.9709003   | 2.3419328   | 2.4550745   | 3.0478222   | 3.808725    | 2.3876529   | 2.5154371   |
| "Des"     | 3.949355    | 3.9364157   | 3.7845497   | 3.9102197   | 3.9744503   | 4.0045247   | 3.9580367   | 3.975195    |
| "Dexi"    | 6.1894073   | 5.7013235   | 7.1234617   | 7.192744    | 6.6235185   | 6.4533415   | 7.4842844   | 7.011499    |
| "Dffa"    | 4.5958085   | 4.4286723   | 4.2853193   | 4.5929713   | 4.63937     | 4.846957    | 4.5555873   | 4.515376    |
| "Dffb"    | 3.82722795  | 3.4881374   | 3.37226975  | 3.4526065   | 3.5732982   | 3.7146478   | 3.46979275  | 3.47126655  |
| "Dfna5"   | 4.7740015   | 5.3864678   | 5.50497815  | 5.1776734   | 5.25202455  | 5.2168579   | 5.22545635  | 5.10853795  |
| "Dgat1"   | 7.589669    | 8.2417      | 7.407334    | 7.609912    | 7.768016    | 8.241977    | 7.5004354   | 7.5244217   |
| "Dgat2"   | 8.69055075  | 9.6041225   | 10.240866   | 9.9477825   | 9.80594425  | 9.8837135   | 9.4973325   | 9.727737    |
| "Dgcr14"  | 2.7557456   | 2.7230186   | 2.6938016   | 2.7039843   | 2.721811    | 2.8869717   | 2.744597    | 2.7266626   |
| "Dgcr2"   | 4.481392    | 4.945163733 | 4.6499982   | 4.6854997   | 4.877086467 | 4.698162367 | 4.5577108   | 4.730741033 |
| "Dgcr6"   | 7.17813025  | 8.2116457   | 7.59226945  | 8.068465    | 7.9516995   | 7.9423115   | 8.14324515  | 8.05990165  |
| "Dgka"    | 3.7664156   | 5.092189    | 4.0907226   | 4.806436    | 4.704021    | 4.5115914   | 4.6716447   | 4.156794    |
| "Dgke"    | 2.628626    | 2.6050823   | 2.6083832   | 2.4698546   | 2.6234255   | 2.6780443   | 2.5432134   | 2.6277356   |
| "Dgkq"    | 4.681068    | 5.146045    | 4.668264    | 4.778309    | 4.9946775   | 5.053032    | 4.8149896   | 4.958919    |
| "Dgkz"    | 7.5818695   | 7.565021    | 8.05960285  | 8.0012115   | 7.98720175  | 7.9485843   | 8.1318305   | 7.90548675  |
| "Dguok"   | 6.0044174   | 6.546688    | 6.983351    | 6.910126    | 6.598516    | 6.5020866   | 6.8529725   | 6.7968774   |
| "Dhcr24"  | 7.956979067 | 8.054964367 | 8.503919633 | 8.4708029   | 8.0831608   | 7.6359361   | 8.192044233 | 8.0684189   |
| "Dhcr7"   | 9.067181    | 9.008049    | 10.576163   | 10.026431   | 7.293748    | 6.530999    | 8.873922    | 9.387491    |
| "Dhdds"   | 3.9191052   | 4.1245413   | 4.220242133 | 4.087333133 | 4.0734378   | 3.986571967 | 4.1307505   | 4.093908    |
| "Dhfr"    | 7.812432    | 7.7523303   | 8.117666    | 8.653683    | 8.7796135   | 7.9245067   | 9.124225    | 8.818697    |
| "Dhh"     | 2.3818052   | 2.3500707   | 2.3483775   | 2.333019    | 2.3688755   | 2.3637745   | 2.3728075   | 2.3630183   |
| "Dhodh"   | 4.06809355  | 3.87965265  | 4.12392635  | 4.1655686   | 4.0774792   | 4.01415935  | 4.3955407   | 4.1421329   |
| "Dhps"    | 5.5994666   | 6.2714485   | 5.38852935  | 5.090462    | 5.48532485  | 5.906915    | 5.57198125  | 5.59974645  |
| "Dhrs1"   | 9.258908    | 9.150971    | 9.448048    | 9.636187    | 9.838627    | 9.133374    | 10.143132   | 9.834422    |
| "Dhrs11"  | 2.9872816   | 2.8691792   | 3.6425178   | 4.0911417   | 3.6829143   | 3.1147022   | 4.0566034   | 4.4391775   |
| "Dhrs3"   | 9.197948    | 8.65395     | 10.39231    | 10.237065   | 9.516656    | 8.757444    | 10.572057   | 10.023799   |
| "Dhrs4"   | 9.3821805   | 10.1440535  | 9.331457    | 9.8047505   | 10.36037075 | 10.57388    | 10.044792   | 10.148968   |
| "Dhrs7"   | 8.038668    | 8.305826    | 9.119126    | 9.480136    | 9.182626    | 7.5173635   | 9.462156    | 9.377408    |
| "Dhrs7b"  | 6.207495    | 6.8337584   | 7.1965513   | 7.5179696   | 6.361007    | 6.6314874   | 7.263507    | 7.06588     |
| "Dhx15"   | 11.279052   | 10.805258   | 10.5239335  | 10.484629   | 10.75029    | 11.220093   | 10.949454   | 10.98213    |
| "Dhx16"   | 8.198209    | 7.9467254   | 7.8899503   | 8.128722    | 8.355913    | 8.62957     | 8.21235     | 8.228042    |
| "Dhx30"   | 6.879073    | 6.873264325 | 6.629592675 | 6.664969175 | 6.733494325 | 6.988793975 | 6.772406325 | 6.493660975 |
| "Dhx32"   | 7.6044784   | 8.504977    | 8.485422    | 8.553707    | 8.314629    | 8.246226    | 9.614159    | 7.910405    |
| "Dhx36"   | 9.039807    | 9.0590855   | 8.2091885   | 7.9429495   | 8.40476     | 9.06751275  | 8.4907525   | 8.280206    |
| "Dhx40"   | 9.333187    | 9.091374    | 8.901528    | 8.843869    | 9.312859    | 9.348435    | 8.890385    | 8.71127     |
| "Dhx57"   | 3.5797627   | 3.2790518   | 3.691698    | 3.8106709   | 3.299598    | 3.5136106   | 4.117843    | 3.5486221   |
| "Dhx58"   | 3.4810499   | 3.06692515  | 4.5860126   | 3.95107915  | 3.05955015  | 3.03603875  | 3.8715056   | 3.5536983   |
| "Dhx8"    | 4.421938    | 4.660433    | 4.3482313   | 4.34677     | 4.4204593   | 4.530682    | 4.361583    | 4.3883853   |
| "Dhx9"    | 9.339678    | 8.95259985  | 8.7596137   | 8.51034725  | 9.0308147   | 9.13258825  | 8.86411215  | 9.099781    |
| "Diablo"  | 5.539909    | 5.6437838   | 5.652292    | 5.63133015  | 5.71468795  | 5.63021335  | 5.55003835  | 5.7496942   |
| "Diap1"   | 5.8971263   | 5.848787    | 5.946633    | 5.7828191   | 5.98998115  | 6.187729    | 5.94296105  | 5.7722722   |
| "Diap2"   | 7.1851916   | 6.9680395   | 7.1124167   | 7.262497    | 6.8391123   | 7.3121047   | 7.0472565   | 7.640022    |
| "Diap3"   | 3.0023685   | 2.9830356   | 2.9030354   | 2.936102    | 3.008404    | 3.0730414   | 2.9921982   | 3.0089307   |
| "Dicer1"  | 6.28155805  | 7.38588335  | 6.6804995   | 6.7297835   | 7.23267295  | 6.8010015   | 7.02055385  | 7.01455305  |
| "Dido1"   | 7.628669    | 7.595527    | 7.86394     | 7.0987387   | 7.691906    | 7.6200323   | 7.1067257   | 7.4818516   |
| "Diexf"   | 4.814677    | 4.7954407   | 4.8383493   | 5.0981407   | 5.0199633   | 5.441574    | 4.9247293   | 5.116701    |
| "Dimt1"   | 5.1166128   | 4.5210992   | 4.0489725   | 4.2935978   | 4.1540785   | 4.6801914   | 4.312327    | 4.187455    |
| "Dio1"    | 8.941373    | 10.63514    | 10.994741   | 11.8922615  | 11.854248   | 11.17865    | 11.714561   | 11.876357   |
| "Dip2b"   | 6.288076    | 6.0517826   | 6.956021    | 6.2472787   | 6.3361144   | 5.74866     | 6.366449    | 6.2436934   |
| "Diras1"  | 2.362717    | 2.3363652   | 2.3281543   | 2.288271    | 2.353366    | 2.350458    | 2.3445199   | 2.3794909   |
| "Dis3"    | 6.472559    | 6.926658    | 5.8917413   | 5.879779    | 6.497333    | 6.246665    | 6.063075    | 6.342226    |
| "Dixdc1"  | 2.422406    | 2.404704    | 2.3707635   | 2.361615    | 2.4238653   | 2.4138584   | 2.41097     | 2.408891    |
| "Dkk2"    | 2.3887825   | 2.3611345   | 2.2874079   | 2.3265395   | 2.391664    | 2.3767734   | 2.3747578   | 2.3689113   |
| "Dkk3"    | 2.4763946   | 2.4556453   | 2.45421995  | 2.4118402   | 2.5223303   | 2.4802532   | 2.4485543   | 2.49633705  |
| "Dkk4"    | 2.2671502   | 2.237178    | 2.1764905   | 2.20467     | 2.2594054   | 2.7435827   | 2.2526739   | 2.244654    |
| "Dkk11"   | 2.5667365   | 2.5605116   | 2.5000465   | 2.5267432   | 2.5643005   | 2.5750892   | 2.5517402   | 2.7383122   |
| "Dlat"    | 6.7497031   | 7.363801633 | 7.395740433 | 7.456436767 | 7.615237567 | 7.3269191   | 7.888784667 | 7.806828333 |
| "Dlcl"    | 2.3993185   | 2.3663185   | 2.3126993   | 2.3399022   | 2.2376723   | 2.379108    | 3.1659286   | 2.3397388   |
| "Dld"     | 10.067756   | 10.230974   | 10.026694   | 10.031017   | 10.401533   | 10.082069   | 10.380088   | 10.307619   |
| "Dleu2"   | 8.842234    | 7.88773175  | 8.25701625  | 9.4900205   | 7.9549135   | 8.3790065   | 8.558265    | 7.99455335  |
| "Dlgl1"   | 7.362335    | 7.438589    | 7.4118372   | 7.64991665  | 7.50462785  | 7.8206383   | 7.5595218   | 7.73547785  |
| "Dlgl2"   | 2.7952992   | 2.7728859   | 2.70214585  | 2.71074555  | 2.80097405  | 2.7929325   | 2.77922455  | 2.7953019   |
| "Dlgl3"   | 6.3813744   | 6.936225    | 7.2818413   | 7.2358465   | 6.397512    | 7.147435    | 7.2563367   | 7.2331      |
| "Dlgl5"   | 3.6550994   | 3.2789521   | 3.8669326   | 2.9906406   | 3.1308334   | 3.476984    | 3.3094254   | 2.9477987   |
| "Dlgap4"  | 6.0255785   | 6.017092    | 6.236555    | 6.2680235   | 6.439316    | 6.177007    | 5.878591    | 6.118517    |
| "Dlk2"    | 2.5230038   | 2.4947612   | 2.451755    | 2.4798083   | 2.5146244   | 2.5100112   | 2.5107229   | 2.4993992   |
| "DlI1"    | 7.025787    | 6.1350203   | 6.0503626   | 6.117635    | 5.9982986   | 5.7849426   | 6.3812733   | 6.1855597   |
| "DlI3"    | 2.4465184   | 2.414675    | 2.3828173   | 2.3921318   | 2.43698     | 2.4376736   | 2.431838    | 2.4239388   |
| "DlI4"    | 2.5737233   | 2.5642807   | 2.720889    | 2.5290184   | 2.5841742   | 2.697669    | 2.7084217   | 2.627715    |
| "Dist"    | 7.7595152   | 8.5420835   | 7.3439855   | 7.599452    | 7.837146    | 7.7858933   | 7.570558    | 7.7111527   |
| "Dlx1"    | 2.604517    | 2.5788956   | 2.5157824   | 2.5231156   | 2.5993848   | 2.611951    | 2.5839114   | 2.6000261   |

|            |             |             |             |             |             |             |             |             |
|------------|-------------|-------------|-------------|-------------|-------------|-------------|-------------|-------------|
| "Dlx1as"   | 2.6045542   | 2.5761511   | 2.5005717   | 2.5470505   | 2.6009624   | 2.5968556   | 2.5850978   | 2.5925183   |
| "Dlx2"     | 2.6373682   | 2.5957332   | 2.5463068   | 2.586173    | 2.6248941   | 2.621471    | 2.626599    | 2.6080995   |
| "Dlx3"     | 2.7356873   | 2.7051325   | 2.5087438   | 2.6852865   | 2.7267373   | 2.7158191   | 2.7282088   | 2.8416336   |
| "Dlx4"     | 2.353673    | 2.3473892   | 2.2725012   | 2.3258793   | 2.3655603   | 2.356423    | 2.3315878   | 2.4029057   |
| "Dmap1"    | 5.188873    | 6.021098    | 5.6545987   | 5.6277833   | 5.3530993   | 5.597633    | 5.7192826   | 5.514666    |
| "Dmc1"     | 2.6887684   | 2.6613023   | 2.5884395   | 2.6019955   | 2.693243    | 2.6796038   | 2.6783025   | 2.6875746   |
| "Dmd"      | 5.523160767 | 6.4534759   | 6.143853133 | 6.4036491   | 6.625277933 | 5.872508767 | 6.403306933 | 6.253949967 |
| "Dmgdh"    | 11.434032   | 12.549069   | 11.648591   | 13.106507   | 12.406395   | 11.812446   | 12.585207   | 12.427656   |
| "Dmkn"     | 5.7897587   | 2.4694161   | 4.393629    | 2.4589152   | 2.483325    | 2.4770293   | 2.3947072   | 2.3599195   |
| "Dmp1"     | 2.8557029   | 2.849225    | 2.7309072   | 2.793512    | 2.873152    | 2.8829541   | 2.8236208   | 2.8719344   |
| "Dmpk"     | 6.051581    | 4.421986    | 6.3263063   | 5.348037    | 4.944953    | 4.8384514   | 5.3548074   | 5.0182467   |
| "Dmrt1"    | 2.6414301   | 2.609208    | 2.5658493   | 2.5735571   | 2.6364164   | 2.6580734   | 2.6336098   | 2.640299    |
| "Dmrtb1"   | 2.2838206   | 2.2345657   | 2.199162    | 2.1876462   | 2.236756    | 2.2624507   | 2.239092    | 2.453509    |
| "Dmtf1"    | 4.781293    | 4.737132967 | 4.788933967 | 4.8307489   | 4.909954    | 4.953236067 | 4.9864024   | 4.9664229   |
| "Dmx1"     | 7.5942006   | 7.3902493   | 7.516013    | 7.329354    | 7.47853     | 7.4970107   | 7.9209294   | 7.7518897   |
| "Dna2"     | 4.4599489   | 4.71173825  | 4.6715708   | 4.82468215  | 5.04986325  | 5.9409623   | 5.23475465  | 5.9573262   |
| "Dnaja1"   | 10.109761   | 10.8552735  | 10.609927   | 10.845328   | 11.30040225 | 11.2018655  | 10.9209475  | 10.8295815  |
| "Dnaja2"   | 8.6435773   | 9.04109675  | 8.3192875   | 8.4733033   | 8.970809    | 8.875918    | 8.3430692   | 8.7473995   |
| "Dnaja3"   | 6.5755888   | 6.989067567 | 6.2170316   | 6.1308221   | 6.628118267 | 6.850440633 | 6.1045148   | 6.3382134   |
| "Dnaja4"   | 3.6078957   | 3.14781045  | 3.2567026   | 3.12713     | 3.3292611   | 3.2635743   | 3.56032135  | 3.2414874   |
| "Dnajib1"  | 7.378629    | 7.162558    | 7.25123235  | 6.883171    | 7.43786185  | 7.76001165  | 7.000718    | 7.3167815   |
| "Dnajib1"  | 8.058805    | 8.653772    | 8.390944    | 8.324902    | 9.524527    | 9.259966    | 8.368208    | 8.795952    |
| "Dnajib12" | 5.3639008   | 5.71718     | 5.225545    | 5.32094695  | 5.27960945  | 5.0723572   | 5.22948475  | 5.18243435  |
| "Dnajib13" | 2.2499843   | 2.240591    | 2.2463698   | 3.0954466   | 2.232688    | 2.2307687   | 2.3342698   | 2.2456126   |
| "Dnajib2"  | 8.111215    | 7.076044    | 7.806909    | 7.8510933   | 7.2649393   | 7.6276755   | 7.7460485   | 7.6259265   |
| "Dnajib4"  | 8.213132    | 8.17537125  | 8.1953152   | 8.169872    | 8.258502    | 8.12281     | 7.9098775   | 8.2551535   |
| "Dnajib5"  | 4.01545915  | 4.18716175  | 3.92667435  | 3.9498453   | 4.0129415   | 4.03607095  | 3.7398752   | 4.0396452   |
| "Dnajib6"  | 6.886991175 | 6.6964611   | 6.261012975 | 6.857042675 | 6.782718475 | 6.405676275 | 6.425196825 | 6.819289575 |
| "Dnajib7"  | 2.7117286   | 2.6898777   | 2.5882287   | 2.6386538   | 2.7607899   | 2.7251043   | 2.6923776   | 2.754889    |
| "Dnajib9"  | 10.378045   | 10.303419   | 10.064977   | 10.059226   | 11.427217   | 10.19278    | 9.937377    | 10.651459   |
| "Dnajc1"   | 7.52118125  | 7.728313    | 7.9905655   | 7.5808305   | 7.2216107   | 7.55009285  | 7.2538975   | 7.42168835  |
| "Dnajc10"  | 6.879104633 | 7.017837933 | 7.433503    | 7.089710333 | 7.187282    | 7.257847867 | 6.870785567 | 6.980096833 |
| "Dnajc11"  | 5.1707875   | 5.5659421   | 5.4557363   | 5.4036105   | 5.6855657   | 5.47510425  | 5.33471165  | 5.8355765   |
| "Dnajc12"  | 9.259279    | 7.164889    | 9.243485    | 7.842326    | 7.335022    | 7.22931     | 7.5084653   | 8.252982    |
| "Dnajc13"  | 8.958387    | 8.711573    | 8.657988    | 8.491407    | 8.598363    | 8.573821    | 8.208839    | 8.528259    |
| "Dnajc14"  | 6.307008333 | 6.294534133 | 6.3969744   | 6.481475467 | 6.2672642   | 6.467320667 | 6.8261969   | 6.380609    |
| "Dnajc15"  | 9.349946    | 9.6974745   | 9.648205    | 9.470248    | 9.504685    | 9.415123    | 9.587489    | 9.489615    |
| "Dnajc17"  | 2.7994251   | 2.762449    | 2.7354717   | 2.7492998   | 2.783173    | 2.7783055   | 2.7893546   | 2.7688174   |
| "Dnajc18"  | 3.03557025  | 3.23336795  | 2.9154725   | 2.90520715  | 2.96257295  | 3.1750852   | 2.93847525  | 2.99767615  |
| "Dnajc19"  | 6.14254685  | 6.9450235   | 6.7749226   | 6.98490665  | 7.00328925  | 7.00832525  | 7.0358145   | 6.93879675  |
| "Dnajc2"   | 5.51825845  | 5.86423775  | 5.201494075 | 5.261523525 | 5.4853067   | 5.734643375 | 5.30164395  | 5.3734348   |
| "Dnajc21"  | 8.914043    | 8.7171135   | 8.107962    | 8.072992    | 8.127808    | 8.9855995   | 8.091125    | 8.254885    |
| "Dnajc24"  | 4.57179415  | 4.7287657   | 4.86521335  | 4.98577825  | 4.85796535  | 4.53095525  | 4.997524    | 5.06819185  |
| "Dnajc27"  | 2.5091561   | 2.34218005  | 2.5320779   | 2.3236397   | 2.3864695   | 2.36272465  | 2.36205425  | 2.4037608   |
| "Dnajc28"  | 3.37810305  | 3.8665507   | 3.73873135  | 4.0049981   | 3.98344135  | 3.90039635  | 3.9515343   | 3.9879372   |
| "Dnajc3"   | 9.8677446   | 9.84936376  | 9.2355824   | 9.3796439   | 10.0255864  | 10.14801906 | 9.64296466  | 9.63579094  |
| "Dnajc30"  | 8.66184     | 9.252918    | 8.58662     | 8.65925     | 8.850578    | 8.718624    | 8.358265    | 8.041506    |
| "Dnajc4"   | 5.466293    | 6.228287    | 6.606413    | 6.5189223   | 6.3522754   | 6.497702    | 6.7590413   | 6.56893     |
| "Dnajc5"   | 6.63324222  | 6.7066996   | 6.50969702  | 6.34663064  | 6.77273738  | 6.39500846  | 6.38498112  | 6.56454022  |
| "Dnajc5b"  | 2.347691    | 2.3200688   | 2.267733    | 2.2687874   | 2.38662     | 2.3353705   | 2.3281074   | 2.332858    |
| "Dnajc7"   | 9.151869    | 8.949687    | 8.653136    | 8.571894    | 8.639831    | 9.120211    | 8.454368    | 8.793252    |
| "Dnajc8"   | 9.501379    | 9.373104    | 9.78883     | 9.423544    | 9.27318     | 9.240546    | 9.046419    | 9.315704    |
| "Dnajc9"   | 6.124885    | 5.5274253   | 5.756237    | 6.145298    | 5.2622747   | 5.462003    | 5.7870603   | 5.5848827   |
| "Dnalc4"   | 3.309614    | 3.3035343   | 3.217222    | 3.226268    | 3.2448776   | 3.2462862   | 3.1052592   | 3.0630674   |
| "Dnase111" | 3.9184165   | 2.3231564   | 3.6384852   | 3.3001251   | 3.3289013   | 3.3726053   | 3.3841054   | 3.3629336   |
| "Dnase112" | 2.4500802   | 2.4317336   | 2.3667455   | 2.3838851   | 2.4414778   | 2.4368443   | 2.4417536   | 2.4232066   |
| "Dnase113" | 5.2405508   | 4.1308744   | 5.4234742   | 5.60111125  | 5.1235425   | 4.24132215  | 6.10832565  | 5.4224795   |
| "Dnase2a"  | 11.211215   | 9.922532    | 10.460476   | 10.068455   | 10.698589   | 10.856521   | 11.653759   | 10.416666   |
| "Dnase2b"  | 7.121335    | 6.859593    | 6.474751    | 7.0162663   | 6.9741006   | 7.260702    | 6.675572    | 7.2138577   |
| "Dnd1"     | 3.029391    | 3.0095353   | 2.9205096   | 2.942713    | 3.0397928   | 3.0499468   | 3.0328057   | 3.0177703   |
| "Dner"     | 2.6845205   | 2.663911    | 2.5531306   | 2.599835    | 2.6896217   | 2.6966517   | 2.6595714   | 2.6877885   |
| "Dnlz"     | 5.2782483   | 5.1163073   | 5.065668    | 5.1994624   | 5.317442    | 5.760858    | 5.434851    | 5.160371    |
| "Dnm1"     | 5.30846395  | 5.3539991   | 5.531085725 | 5.21673645  | 5.33609965  | 5.3881461   | 5.580603675 | 5.432724275 |
| "Dnm2"     | 3.384284867 | 3.505692733 | 3.370107317 | 3.403548617 | 3.490554433 | 3.49584395  | 3.371022667 | 3.658845733 |
| "Dnm3"     | 2.4562569   | 2.436108    | 2.4338217   | 2.3652809   | 2.458123    | 2.4491606   | 2.422305    | 2.4758937   |
| "Dnm3os"   | 2.4616332   | 2.4370147   | 2.37831535  | 2.40381075  | 2.5033134   | 2.54307365  | 2.43846345  | 2.46911445  |
| "Dnmbp"    | 8.769091    | 8.565522    | 7.171388    | 7.701456    | 8.415046    | 8.875446    | 8.043715    | 8.179421    |
| "Dnmt1"    | 6.22129025  | 5.68474465  | 6.97871415  | 6.7602508   | 6.06382605  | 6.039551    | 7.05124915  | 6.6779886   |
| "Dnmt3a"   | 4.48156762  | 4.3519959   | 4.91934958  | 5.27581658  | 4.65156702  | 4.52142308  | 4.98825728  | 5.0142222   |
| "Dnmt3b"   | 3.5032935   | 3.1921659   | 3.44332     | 3.4303339   | 3.5735908   | 3.6368704   | 3.4860141   | 3.2221537   |
| "Dnmt3l"   | 2.5157204   | 2.4820163   | 2.440476    | 2.416711    | 2.5338902   | 2.5107625   | 2.4526083   | 2.5729394   |
| "Dnpep"    | 7.57409288  | 8.0939622   | 7.68706568  | 7.7935462   | 7.9518109   | 7.97461472  | 7.7643623   | 7.72502024  |
| "Dntt"     | 4.318038767 | 4.653578167 | 3.2531757   | 3.205065067 | 3.189956533 | 3.6367431   | 2.772336533 | 2.789412667 |
| "Dnttip1"  | 8.869182    | 8.688562    | 8.397245    | 8.381619    | 8.40758     | 8.704494    | 8.340491    | 8.441529    |
| "Dnttip2"  | 7.882978    | 6.9741435   | 6.6919728   | 6.6371565   | 6.6839302   | 7.43215765  | 6.753479    | 6.8766508   |
| "Doc2a"    | 2.6493459   | 2.6125393   | 2.5265176   | 2.6056445   | 2.6350257   | 2.6321096   | 2.62539     | 2.622079    |
| "Doc2b"    | 2.5124688   | 2.485056    | 2.4348812   | 2.437636    | 2.5107331   | 2.502981    | 2.5027583   | 2.499036    |
| "Doc2g"    | 2.4116995   | 2.3874812   | 2.3102164   | 2.3779063   | 2.4064121   | 2.4024065   | 2.4112582   | 2.3943007   |
| "Dock1"    | 8.111317    | 7.8215804   | 7.4668646   | 7.4568267   | 7.288171    | 7.938626    | 7.033365    | 6.7936873   |
| "Dock2"    | 5.5557857   | 3.4258666   | 5.1294565   | 4.183645    | 3.8992202   | 3.1940494   | 4.922211    | 2.7913265   |
| "Dock5"    | 5.239107    | 5.355637    | 5.3705826   | 5.8892093   | 5.005974    | 5.365991    | 5.313471    | 5.503828    |

|          |             |             |             |             |             |             |             |             |
|----------|-------------|-------------|-------------|-------------|-------------|-------------|-------------|-------------|
| "Dock6"  | 6.539143    | 6.181927    | 7.056434    | 6.4006805   | 6.3556423   | 6.5057974   | 6.484118    | 6.4504128   |
| "Dock7"  | 5.15575565  | 5.27491165  | 5.6747724   | 5.69467425  | 5.465274    | 5.4215042   | 6.39793435  | 5.64191775  |
| "Dock8"  | 6.034175    | 6.6470413   | 7.2086864   | 8.115652    | 6.597205    | 6.5355196   | 7.318353    | 7.64663     |
| "Dock9"  | 5.659920733 | 6.111401667 | 5.958550733 | 6.009738833 | 5.977269833 | 5.970026333 | 6.238600433 | 6.009494167 |
| "Dohh"   | 4.2363087   | 3.99941735  | 4.2951552   | 3.9287517   | 4.1278644   | 4.14248655  | 3.79059285  | 4.13900065  |
| "Dok1"   | 2.9949622   | 2.7267082   | 3.2304904   | 3.0539067   | 3.0379646   | 3.1204512   | 2.9343824   | 3.2650554   |
| "Dok2"   | 3.1655226   | 2.4975019   | 3.4962466   | 2.634475    | 2.6778517   | 2.6702127   | 2.5461001   | 2.6645894   |
| "Dok3"   | 4.47724     | 4.501735    | 4.2565618   | 4.224881    | 4.2868934   | 4.2807755   | 4.046553    | 4.4217186   |
| "Dolk"   | 6.894867    | 7.201145    | 7.071969    | 7.3915634   | 7.3356752   | 7.6147      | 7.5962453   | 7.7096734   |
| "Dolpp1" | 2.578637    | 2.5839944   | 2.5088034   | 2.6689942   | 2.8540897   | 2.6503997   | 2.5682998   | 2.5878863   |
| "Dom3z"  | 4.894338    | 4.80581     | 4.6075006   | 4.5380726   | 4.748133    | 5.236886    | 4.5381875   | 4.797889    |
| "Donson" | 4.8336196   | 4.601392    | 4.567151    | 5.0762734   | 4.662674    | 4.933998    | 4.4593725   | 4.6700153   |
| "Dopey2" | 3.75326645  | 4.51931275  | 4.26900585  | 4.4344429   | 4.03458045  | 4.74367475  | 4.5927979   | 4.230631    |
| "Dos"    | 3.22275435  | 2.48558245  | 2.42253985  | 2.4480933   | 2.51129255  | 2.50687435  | 2.60187375  | 2.49965525  |
| "Dpagt1" | 7.0083613   | 7.499203    | 7.787539    | 7.7932396   | 8.173987    | 8.191303    | 7.6458225   | 7.864238    |
| "Dpcd"   | 6.167394    | 6.45401     | 6.7333374   | 6.637969    | 6.0809975   | 6.0136714   | 6.3371954   | 6.5892      |
| "Dpep1"  | 3.127475    | 3.5684013   | 2.6215994   | 2.9779634   | 3.3742661   | 3.9337049   | 2.2730677   | 2.9754608   |
| "Dpep3"  | 2.7719626   | 2.776338    | 2.734698    | 2.7050633   | 2.856061    | 2.8586254   | 2.7368836   | 2.7832093   |
| "Dpf1"   | 2.6244222   | 2.5998458   | 2.5544257   | 2.5771262   | 2.624473    | 2.62156065  | 2.6037538   | 2.60955595  |
| "Dpf2"   | 6.3395605   | 6.948943    | 6.668824    | 6.854315    | 7.0735765   | 7.105331    | 6.819054    | 6.675723    |
| "Dph1"   | 7.1863103   | 7.592385    | 6.7615833   | 6.2498827   | 7.136438    | 7.2227545   | 6.719475    | 6.6371      |
| "Dph2"   | 3.0762923   | 3.2073426   | 2.909109    | 2.90708     | 3.5679898   | 3.5642564   | 2.9817948   | 3.077096    |
| "Dph5"   | 5.74007285  | 5.63545535  | 5.38958195  | 5.3925157   | 5.81124515  | 5.6399515   | 5.309283    | 5.40692865  |
| "Dpm1"   | 6.7444332   | 7.4865905   | 6.2951486   | 6.4881647   | 6.3198273   | 6.345991    | 6.369009    | 6.243745    |
| "Dpm2"   | 6.7415876   | 7.018894    | 6.950753    | 6.8621435   | 6.8817687   | 6.990638    | 7.1648054   | 6.833452    |
| "Dpp3"   | 7.3676248   | 7.5057755   | 7.70179     | 7.5107574   | 7.55498     | 7.347492    | 7.609066    | 7.5121446   |
| "Dpp4"   | 6.88540075  | 6.9604125   | 7.5366087   | 8.28928125  | 7.9462262   | 7.3655825   | 8.4705905   | 7.8667455   |
| "Dpp7"   | 5.921835367 | 5.725634    | 5.8874728   | 5.660980733 | 5.8042038   | 6.170649833 | 5.7042352   | 5.928716733 |
| "Dpp8"   | 5.8159835   | 6.0286474   | 5.947778    | 5.940619    | 6.4557364   | 6.38214     | 6.2986012   | 6.54452015  |
| "Dppa2"  | 2.6514506   | 2.6878464   | 2.5423257   | 2.5768812   | 2.6456952   | 2.6528096   | 2.6282744   | 2.649456    |
| "Dppa5a" | 2.4630718   | 2.4267726   | 2.3537014   | 2.3823361   | 2.4557662   | 2.4543242   | 2.4522781   | 2.4911058   |
| "Dpt"    | 3.056809    | 3.837709    | 3.535181    | 3.701498    | 3.7432127   | 4.5533752   | 3.6833582   | 4.2238765   |
| "Dpy30"  | 9.029279    | 9.642902    | 9.56727     | 9.615449    | 9.599155    | 9.448038    | 9.901236    | 9.533642    |
| "Dpyd"   | 12.029028   | 12.06904    | 11.0819785  | 11.9736855  | 12.0122095  | 12.1121465  | 12.2957075  | 12.288049   |
| "Dpys"   | 9.095757667 | 9.295181    | 8.946188333 | 9.449395    | 9.7292192   | 8.95037     | 9.530936333 | 9.524607    |
| "Dpysl3" | 3.1095475   | 2.9506496   | 3.42060715  | 2.91692465  | 3.06475985  | 2.72985355  | 2.99207975  | 2.9859583   |
| "Dpysl4" | 2.451738    | 2.41098775  | 2.3824142   | 2.3935334   | 2.44509335  | 2.4399401   | 2.4334439   | 2.42493645  |
| "Dpysl5" | 2.8614268   | 2.8445244   | 2.8136892   | 2.8193026   | 2.8604121   | 2.8630219   | 2.8252993   | 2.8604414   |
| "Dqx1"   | 2.440226    | 2.4477377   | 2.49259     | 2.3969266   | 2.4182127   | 2.5231245   | 2.4204216   | 2.4212193   |
| "Drt1"   | 7.04280265  | 5.8780318   | 6.211847    | 5.8787174   | 6.10344935  | 6.11258725  | 6.1717294   | 6.06150075  |
| "Dram1"  | 5.776864    | 3.9926047   | 5.911075    | 5.254502    | 4.8474226   | 4.091794    | 5.0205727   | 4.4839296   |
| "Dram2"  | 9.368597    | 9.2619955   | 9.799943    | 9.6812045   | 9.575757    | 9.457486    | 10.055992   | 9.559181    |
| "Drap1"  | 7.75859     | 8.005269    | 7.64191     | 7.880914    | 7.770258    | 7.7242837   | 7.7303214   | 7.608965    |
| "Drd2"   | 2.393882    | 2.3655512   | 2.328016    | 2.345714    | 2.3871236   | 2.3697796   | 2.384739    | 2.3751292   |
| "Drd4"   | 2.6136842   | 2.581049    | 2.4764924   | 2.565977    | 2.6036227   | 2.6022177   | 2.6030004   | 2.5893302   |
| "Drg1"   | 8.658345    | 9.2040135   | 8.6704565   | 8.881096    | 8.8053275   | 9.094276    | 8.669855    | 8.880932    |
| "Drg2"   | 5.847923    | 5.9333115   | 5.8869324   | 5.859941    | 6.1386595   | 5.490282    | 5.6297417   | 5.68482     |
| "Dsc1"   | 2.7493763   | 2.7298698   | 2.6663659   | 2.6894515   | 2.7517176   | 2.7466173   | 2.7281172   | 2.7400656   |
| "Dsc2"   | 8.0972435   | 6.8966855   | 8.389325    | 8.51317585  | 7.36541035  | 8.22108715  | 8.9512861   | 8.322202    |
| "Dsc3"   | 2.925299    | 2.9238868   | 2.8508563   | 2.8658345   | 2.9165013   | 2.9233553   | 2.9127848   | 3.093822    |
| "Dscr3"  | 7.749847    | 7.32836     | 8.270344    | 8.127584    | 7.58197     | 8.035538    | 8.017914    | 7.84259     |
| "Dsg2"   | 7.264796867 | 7.561567567 | 7.773902033 | 7.996588867 | 7.683113383 | 7.4390256   | 8.2809685   | 8.074182767 |
| "Dsn1"   | 2.576241    | 2.5470018   | 2.5436745   | 2.5133681   | 2.5662513   | 2.5735178   | 2.5658426   | 2.5384517   |
| "Dsp"    | 7.175450733 | 7.0793477   | 7.371803533 | 7.355783    | 7.2699182   | 7.2542678   | 8.009176167 | 7.837806933 |
| "Dst"    | 8.939843    | 7.98571235  | 6.51884015  | 6.9368295   | 7.07774185  | 7.405476    | 6.3707509   | 6.5829155   |
| "Dstn"   | 12.109219   | 12.379601   | 11.917206   | 11.885613   | 11.61216    | 11.683253   | 11.470313   | 11.618658   |
| "Dstyky" | 6.5080707   | 6.3824112   | 6.23989655  | 5.91472275  | 6.61557     | 6.701804    | 6.3324595   | 6.26514005  |
| "Dtd1"   | 7.748103    | 8.244058    | 8.649558    | 8.353772    | 7.912153    | 7.7537947   | 8.176685    | 7.9707828   |
| "Dtl"    | 2.5051296   | 2.4719796   | 2.4646299   | 2.45576     | 2.504205    | 2.48711145  | 2.4875816   | 2.48267355  |
| "Dtna"   | 2.738379667 | 2.717978433 | 2.628550067 | 2.669229933 | 2.7455958   | 2.849452333 | 2.7196633   | 2.796101667 |
| "Dtnb"   | 3.6877255   | 5.47538     | 3.760655    | 3.8610084   | 3.6697888   | 3.927622    | 3.978854    | 4.203743    |
| "Dtnbp1" | 7.8488264   | 8.643676    | 7.881024    | 8.10185     | 8.061759    | 8.599952    | 7.916002    | 8.181383    |
| "Dtwd1"  | 7.586035    | 7.1723547   | 7.180816    | 7.08464     | 7.0312123   | 6.753181    | 7.091095    | 7.0266843   |
| "Dtx1"   | 2.2252069   | 2.563819    | 2.1431625   | 2.1795774   | 2.215029    | 2.3016896   | 2.221326    | 2.2014775   |
| "Dtx2"   | 4.23339555  | 3.83580995  | 4.03655935  | 4.04238245  | 4.1443565   | 4.05743215  | 3.9153345   | 4.18287175  |
| "Dtymk"  | 6.557715967 | 7.356759167 | 7.159856    | 7.106542833 | 7.134326967 | 6.9619667   | 7.187490533 | 7.305181333 |
| "Dub2a"  | 2.5895699   | 2.56095615  | 2.4793247   | 2.52191815  | 2.58554935  | 2.5881565   | 2.57789915  | 2.6215024   |
| "Duoxa2" | 2.2643414   | 2.26703     | 2.2021677   | 2.3565698   | 2.2891717   | 2.2823813   | 2.2870073   | 2.2743435   |
| "Dus1l"  | 9.6948025   | 9.978193    | 9.421879    | 9.4592075   | 10.435383   | 10.122583   | 9.771386    | 9.9648635   |
| "Dus3l"  | 5.9184036   | 6.229233    | 5.869228    | 5.7909737   | 6.104658    | 6.4451866   | 5.9437904   | 6.2364817   |
| "Dusp1"  | 12.05964    | 10.346683   | 9.853333    | 9.296618    | 9.848359    | 10.270233   | 9.786472    | 9.669255    |
| "Dusp10" | 4.31756485  | 3.54827625  | 3.7781185   | 3.54546225  | 3.5821605   | 3.5277548   | 3.50877425  | 3.5914874   |
| "Dusp11" | 7.9820457   | 8.0172835   | 7.88490025  | 8.1046869   | 7.84637725  | 8.35597385  | 7.8583815   | 8.4565435   |
| "Dusp12" | 4.21470305  | 4.6380575   | 4.68532025  | 4.9680418   | 4.51787755  | 4.75760585  | 4.76788235  | 4.67882945  |
| "Dusp14" | 3.1230366   | 2.7117705   | 2.5459857   | 2.5393994   | 2.629255    | 2.4110825   | 2.5850089   | 2.4291506   |
| "Dusp16" | 10.513533   | 9.463801    | 9.006683    | 9.439283    | 8.854939    | 10.154518   | 9.297062    | 9.265619    |
| "Dusp18" | 2.5561686   | 2.55457     | 2.4600837   | 2.4852393   | 2.5432954   | 2.5367234   | 2.5377035   | 2.5426478   |
| "Dusp19" | 5.31934175  | 5.71717835  | 6.06119615  | 6.45283505  | 5.5297325   | 5.91352315  | 6.65706215  | 6.11900225  |
| "Dusp22" | 6.7725577   | 6.878465    | 7.2232127   | 7.0070267   | 7.172395    | 7.0171757   | 7.2007065   | 7.0025406   |
| "Dusp26" | 2.5678263   | 2.5393772   | 2.4495387   | 2.4885914   | 2.5683057   | 2.5643299   | 2.5400417   | 2.6133156   |
| "Dusp3"  | 7.48415615  | 6.6621065   | 6.13787655  | 6.3765967   | 7.19271     | 7.2065105   | 6.66485135  | 6.57608125  |

|                 |             |             |             |             |             |             |             |             |
|-----------------|-------------|-------------|-------------|-------------|-------------|-------------|-------------|-------------|
| "Dusp6"         | 10.990063   | 8.0854025   | 10.301663   | 10.064789   | 9.424183    | 8.750636    | 10.70432    | 9.758221    |
| "Dusp7"         | 3.1996813   | 3.4051516   | 3.81597115  | 3.59497965  | 3.793079    | 3.5314851   | 3.989519    | 3.5580968   |
| "Dusp8"         | 5.539562    | 2.6343782   | 2.4767106   | 2.6026518   | 2.6546686   | 3.068812    | 2.6306493   | 2.640104    |
| "Dusp9"         | 2.5922982   | 2.535324133 | 2.475934533 | 2.498020233 | 2.5648006   | 2.6051893   | 2.5461942   | 2.550870333 |
| "Dut"           | 4.45963325  | 4.45125745  | 4.6633114   | 4.9820825   | 4.51123465  | 4.62412535  | 4.9407255   | 4.87981235  |
| "Dvl1"          | 9.46292725  | 9.521848    | 9.2632735   | 9.3227622   | 9.3459395   | 10.2586215  | 9.15821635  | 9.586206    |
| "Dvl2"          | 2.7368972   | 2.696001    | 2.6699119   | 2.6879025   | 2.7228472   | 2.7125225   | 2.7211423   | 2.7166839   |
| "DXBay18"       | 3.0155153   | 2.9966009   | 3.3410635   | 3.451885    | 3.0336409   | 3.038167    | 3.0347497   | 3.0185394   |
| "DXErtd11e"     | 2.83865     | 2.8085225   | 2.7716694   | 2.793721    | 3.0321016   | 2.9042885   | 2.829306    | 2.81896     |
| "DXErtd223e"    | 2.97270715  | 2.9482955   | 2.97710335  | 2.90709895  | 2.97721285  | 2.9728298   | 2.9513881   | 3.04132295  |
| "DXErtd242e"    | 2.7058077   | 2.6791985   | 2.5849965   | 2.6263905   | 2.7071495   | 2.7014275   | 2.687457    | 2.7053747   |
| "Dym"           | 6.85970025  | 7.6991755   | 6.5654537   | 7.77575075  | 7.5274977   | 7.17701625  | 7.4188075   | 7.32036525  |
| "Dync1h1"       | 8.063037    | 7.836787    | 7.973949    | 8.020932    | 8.44403     | 8.535052    | 7.969511    | 8.293239    |
| "Dync1i1"       | 2.5765538   | 2.561766    | 2.4871745   | 2.5184746   | 2.5784643   | 2.5732515   | 2.519159    | 2.6143565   |
| "Dync1i2"       | 8.992097    | 8.57391     | 8.934962    | 8.616091    | 8.797645    | 8.589914    | 9.1582155   | 8.802787    |
| "Dync1li1"      | 7.4028606   | 7.0060124   | 6.193766    | 6.574422    | 6.32464     | 6.6452537   | 6.759695    | 6.2605453   |
| "Dynl1i"        | 9.956114833 | 9.403715333 | 11.526507   | 9.452030333 | 9.440340333 | 9.247333833 | 10.233976   | 10.3720515  |
| "Dynl1i2"       | 9.2067675   | 9.341694    | 9.633406    | 9.34433     | 8.7511482   | 9.5237565   | 9.405324    | 9.4442755   |
| "Dynlrb1"       | 10.176841   | 10.697001   | 10.420853   | 10.501717   | 10.3426285  | 10.118001   | 10.690695   | 10.307234   |
| "Dynlt1a"       | 10.2347125  | 9.603202    | 10.298716   | 9.8299695   | 9.335149    | 9.4822915   | 9.56468675  | 9.5630035   |
| "Dynlt1f"       | 2.45640805  | 2.42681615  | 2.39427575  | 2.4474081   | 2.44949255  | 2.4317291   | 2.4488405   | 2.44218405  |
| "Dynlt3"        | 9.586956333 | 9.167151    | 9.617651333 | 9.701516667 | 9.032097167 | 8.9590579   | 9.596849    | 9.414213    |
| "Dyrk1a"        | 5.139118167 | 4.570822167 | 4.209221467 | 4.477516367 | 4.731623567 | 4.908364367 | 4.590123233 | 4.594974267 |
| "Dyrk3"         | 4.1772676   | 3.2561882   | 3.7789855   | 3.2385168   | 3.1802778   | 3.8963578   | 3.2791219   | 3.2028003   |
| "Dyx1c1"        | 2.601877    | 2.583555    | 2.5042748   | 2.5633485   | 2.6028614   | 2.5959792   | 2.5941844   | 2.588768    |
| "Dzlp1"         | 2.6799489   | 2.7029078   | 2.60242625  | 2.6154445   | 2.69128475  | 2.6830887   | 2.65020135  | 2.68237305  |
| "E130012A19Rik" | 2.6499197   | 2.6321788   | 2.553388    | 2.5759509   | 2.6943433   | 2.6695247   | 2.6359217   | 2.657636    |
| "E130112N10Rik" | 2.414223    | 2.3820128   | 2.3243208   | 2.3725235   | 2.4027615   | 2.4285896   | 2.397393    | 2.3896925   |
| "E130303B06Rik" | 2.480315    | 2.4408658   | 2.4385223   | 2.4149864   | 2.4668896   | 2.4671202   | 2.4561841   | 2.4527047   |
| "E130309D02Rik" | 6.97428465  | 7.054677    | 6.5065548   | 6.8387335   | 7.4438343   | 7.2895868   | 6.792876    | 7.0333355   |
| "E230006M18Rik" | 2.5994987   | 2.5700998   | 2.5194378   | 2.518454    | 2.595647    | 2.5883765   | 2.5926728   | 2.5909486   |
| "E2f1"          | 2.45482345  | 2.4293165   | 2.4894199   | 2.42685005  | 2.4559212   | 2.5154685   | 2.43713105  | 2.46048335  |
| "E2f3"          | 2.390252    | 3.0527878   | 2.3072739   | 2.363257    | 2.3803115   | 2.3744311   | 2.3843434   | 2.3683844   |
| "E2f5"          | 6.9949862   | 6.5031053   | 5.9794756   | 6.2784693   | 5.9946703   | 6.38713265  | 6.5574345   | 6.4031652   |
| "E2f6"          | 5.565825    | 6.0184155   | 6.5930614   | 6.714572    | 6.2541847   | 6.108362    | 6.369156    | 6.2035685   |
| "E2f8"          | 2.3357992   | 3.230378    | 3.0018406   | 2.7863142   | 3.2827935   | 3.7531357   | 3.618077    | 3.524904    |
| "E330009J07Rik" | 6.8951173   | 7.04996     | 7.498928    | 7.144423    | 7.6170797   | 7.371885    | 8.2066      | 7.8351297   |
| "E330034G19Rik" | 2.4217565   | 2.4025147   | 2.3467834   | 2.3683972   | 2.4247694   | 2.4199476   | 2.416706    | 2.412609    |
| "E430018J23Rik" | 3.0618505   | 3.0826895   | 2.9690988   | 3.0056076   | 3.0265648   | 3.0525517   | 3.0298588   | 3.0783925   |
| "E4f1"          | 5.4737782   | 4.66574     | 4.284096    | 4.3580017   | 4.3834767   | 4.964789    | 4.428067    | 4.8311286   |
| "Eapp"          | 9.156449    | 9.035858    | 8.590266    | 8.787092    | 8.642089    | 9.199489    | 8.849167    | 9.033852    |
| "Ear1"          | 6.5889038   | 5.95455035  | 6.18946385  | 5.7882752   | 6.06854585  | 6.2641435   | 5.9681537   | 5.7113817   |
| "Ear11"         | 2.695118    | 4.7293196   | 2.5626943   | 3.523399    | 2.707747    | 2.7164054   | 2.658021    | 2.700717    |
| "Ear12"         | 10.065809   | 9.2551      | 10.02712    | 9.184597    | 9.398306    | 9.391493    | 8.967806    | 8.550305    |
| "Ear3"          | 5.394883    | 4.396394    | 4.5879884   | 4.1397767   | 4.485228    | 4.558476    | 4.4764543   | 3.893764    |
| "Ear4"          | 2.416204    | 2.3842134   | 2.3216062   | 2.353667    | 2.4229581   | 2.405158    | 2.3990278   | 2.4008193   |
| "Ear5"          | 2.4714227   | 2.4376895   | 2.3590598   | 2.418944    | 2.463931    | 2.4520717   | 2.4626775   | 2.4558165   |
| "Ears2"         | 4.145602    | 4.065078    | 4.12556255  | 3.8988579   | 3.8499566   | 4.5280635   | 3.9959922   | 3.99339435  |
| "Ebag9"         | 9.177349    | 9.346462    | 9.208658    | 9.259169    | 9.443251    | 9.27801     | 9.503232    | 9.295787    |
| "Ebf1"          | 2.8826759   | 2.851418    | 2.772577767 | 2.796385867 | 2.9005298   | 2.902688533 | 2.869671833 | 2.876752133 |
| "Ebf2"          | 2.54370015  | 2.5121899   | 2.4588299   | 2.47147135  | 2.57021975  | 2.536852    | 2.5266603   | 2.53314935  |
| "Ebf3"          | 2.57770585  | 2.5517339   | 2.5032283   | 2.5117459   | 2.57170145  | 2.5701135   | 2.5637237   | 2.565696    |
| "Ebi3"          | 4.4583597   | 3.0353248   | 5.0308294   | 4.0803595   | 3.0064647   | 3.1604784   | 3.9220412   | 3.642491    |
| "Ebna1bp2"      | 5.97509885  | 6.09407185  | 5.71767155  | 5.66707285  | 5.83446385  | 6.128516    | 5.7539384   | 5.83685465  |
| "Ebp"           | 12.506471   | 12.672654   | 12.771898   | 12.619802   | 12.12934    | 12.278627   | 12.378996   | 12.587918   |
| "Ebpl"          | 9.303868    | 9.868911    | 11.024417   | 10.773791   | 10.413857   | 9.308056    | 10.806608   | 10.843083   |
| "Ecd"           | 6.6714387   | 6.7862733   | 6.9471395   | 6.81767935  | 6.95428155  | 6.96873825  | 6.83611615  | 6.82601665  |
| "Ecel1"         | 8.2405232   | 8.658048    | 8.4242713   | 8.5282032   | 8.9989197   | 8.439224    | 8.671849    | 8.6402655   |
| "Ece2"          | 6.543446    | 7.2259827   | 6.7263975   | 6.494503    | 6.5813828   | 7.1261244   | 5.9626446   | 5.6617374   |
| "Ecel1"         | 2.4967666   | 2.4675517   | 2.430365    | 2.4446735   | 2.4881234   | 2.5089602   | 2.4856749   | 2.4809654   |
| "Ech1"          | 10.977737   | 12.154367   | 10.630356   | 11.286058   | 12.521224   | 12.545932   | 12.116852   | 11.844957   |
| "Echdc1"        | 8.234617    | 8.192659    | 8.876608    | 8.81826     | 7.957818    | 7.7051153   | 9.098406    | 9.274113    |
| "Echdc2"        | 7.941307    | 8.409742    | 7.9505696   | 8.123105    | 8.12647     | 8.200414    | 7.902731    | 8.52203     |
| "Echdc3"        | 8.539041    | 9.431757    | 10.817337   | 9.833817    | 9.146004    | 8.144222    | 9.553152    | 10.029589   |
| "Echs1"         | 10.8430805  | 11.3220005  | 11.317964   | 11.376696   | 11.254939   | 10.889344   | 11.162205   | 11.408511   |
| "Eci1"          | 9.793886    | 11.235496   | 10.101547   | 10.755424   | 11.3941145  | 11.188616   | 11.170865   | 11.086658   |
| "Eci2"          | 10.819672   | 11.985366   | 10.118856   | 10.913451   | 11.863602   | 11.79626    | 11.327809   | 11.779325   |
| "Eci3"          | 4.6707296   | 2.5483716   | 8.141632    | 8.456512    | 5.7989397   | 2.5484748   | 8.224073    | 2.5598266   |
| "Ecm1"          | 8.8025465   | 8.4611435   | 8.8385515   | 8.167612    | 8.901836    | 8.739949    | 8.886371    | 8.255204    |
| "Ecsit"         | 6.478113    | 6.972711    | 6.584592    | 6.3463364   | 6.773615    | 7.018129    | 6.6467547   | 6.6394987   |
| "Ect2"          | 2.8597188   | 2.9388237   | 2.690347    | 2.738877    | 2.9898815   | 2.8207967   | 2.7875335   | 2.7828338   |
| "Eda"           | 2.41169205  | 2.39359545  | 2.32777285  | 2.3460995   | 2.404358    | 2.40801535  | 2.3952547   | 2.40525835  |
| "Edc4"          | 6.3100605   | 6.1081257   | 5.523759    | 5.7965326   | 5.927059    | 6.3592916   | 5.891425    | 5.7919497   |
| "Edem1"         | 9.943034    | 9.649956    | 10.336144   | 9.999888    | 10.1322935  | 9.711599    | 10.197033   | 9.870975    |
| "Edem2"         | 6.241854    | 6.925932    | 7.2058606   | 6.9272633   | 7.1492767   | 6.3144536   | 6.8267136   | 7.4082856   |
| "Edem3"         | 9.188168    | 8.9432335   | 8.363354    | 8.283946    | 8.969788    | 9.054653    | 8.47517     | 8.713331    |
| "Edf1"          | 10.328513   | 10.9528745  | 10.4513795  | 10.6159055  | 10.7306275  | 10.587983   | 10.6137785  | 10.614053   |
| "Edil3"         | 2.84556985  | 2.8297486   | 2.72273755  | 2.7682413   | 2.89392565  | 2.87454945  | 2.80732785  | 2.8783876   |
| "Edn1"          | 2.7159429   | 2.5486362   | 2.512997    | 2.5144823   | 2.5631957   | 2.5577168   | 2.545395    | 2.551615    |
| "Edn2"          | 2.403686    | 2.371195    | 2.317453    | 2.3444617   | 2.3944807   | 2.4296336   | 2.3909526   | 2.3758502   |
| "Ednra"         | 2.737683    | 2.72608     | 2.6662507   | 2.6944256   | 2.7442849   | 2.7363417   | 2.926076    | 2.7462428   |

|           |             |             |             |             |             |             |             |             |
|-----------|-------------|-------------|-------------|-------------|-------------|-------------|-------------|-------------|
| "Ednrb"   | 4.49055615  | 4.2649304   | 4.1179005   | 4.0442984   | 4.5394679   | 4.0389061   | 4.13291125  | 3.91467645  |
| "Eea1"    | 7.5255365   | 7.380767    | 6.9824796   | 7.3366675   | 7.2928286   | 7.7959104   | 7.492425    | 7.6044655   |
| "Eed"     | 9.807246    | 9.170147    | 9.169131    | 9.045542    | 9.376984    | 9.681695    | 9.37701     | 9.3879595   |
| "Eef1a1"  | 14.36123    | 14.483766   | 14.285905   | 14.301988   | 14.382821   | 14.433501   | 14.12345    | 14.355488   |
| "Eef1a2"  | 4.270602    | 4.4669037   | 3.5674367   | 3.5431442   | 3.8536234   | 4.0690074   | 3.696806    | 3.855262    |
| "Eef1b2"  | 12.959718   | 12.89395    | 12.817657   | 12.466747   | 12.57768    | 12.828404   | 12.46414    | 12.636867   |
| "Eef1d"   | 10.9562525  | 10.897678   | 10.740522   | 10.557103   | 10.6936015  | 10.865676   | 10.5196375  | 10.678555   |
| "Eef1e1"  | 8.099684    | 8.018152    | 7.7325864   | 7.580669    | 7.5557604   | 8.106963    | 7.43148     | 7.544236    |
| "Eef1g"   | 10.979149   | 11.034561   | 11.157972   | 10.744587   | 11.029066   | 11.331075   | 10.856064   | 10.922281   |
| "Eef2"    | 12.382748   | 12.464659   | 11.922725   | 11.830315   | 12.175489   | 12.421502   | 11.564322   | 11.913625   |
| "Eef2k"   | 2.3856044   | 2.3850203   | 2.3532643   | 3.006284    | 2.3954144   | 2.3399255   | 2.5825179   | 3.5613964   |
| "Eefsec"  | 5.7017817   | 6.283567    | 6.1121507   | 6.277304    | 6.3709946   | 6.7913384   | 6.3183303   | 6.217362    |
| "Eepd1"   | 5.12335     | 6.1122313   | 7.7252893   | 7.733233    | 6.455276    | 6.122154    | 6.8943777   | 7.999253    |
| "Efcab2"  | 3.7454121   | 3.88115465  | 3.8145392   | 3.68414025  | 3.7565417   | 3.74615965  | 3.74491075  | 3.74267125  |
| "Efcab4a" | 3.745108    | 3.7042463   | 3.6405303   | 3.736945    | 3.7309365   | 4.048846    | 3.7313907   | 3.7135017   |
| "Efcab7"  | 2.7343721   | 2.7115264   | 2.6268659   | 2.7548995   | 2.7317696   | 2.8116164   | 2.903224    | 2.7908182   |
| "Efemp1"  | 8.071928    | 7.03859     | 7.7621746   | 7.5605907   | 7.5619636   | 6.759125    | 8.334084    | 7.400358    |
| "Efemp2"  | 2.6505713   | 2.617912    | 3.4440308   | 2.6012864   | 2.6341126   | 2.623796    | 2.642427    | 2.6252701   |
| "Efhd1"   | 2.633755    | 2.7648578   | 2.5820487   | 2.6045225   | 2.63944     | 2.6335928   | 2.6388133   | 2.638374    |
| "Efhd2"   | 8.010888    | 7.759218    | 7.3812113   | 7.0881085   | 7.187124    | 7.2114377   | 6.570156    | 7.025924    |
| "Efn1"    | 9.5948235   | 5.4053719   | 6.99416575  | 6.5326423   | 5.20137115  | 6.30406625  | 6.8711708   | 6.47038765  |
| "Efn3"    | 3.0417278   | 3.0394754   | 2.9329872   | 2.9287767   | 3.028119    | 3.018753    | 3.0282154   | 3.0135598   |
| "Ffnb1"   | 4.298029067 | 4.143681867 | 4.124698833 | 4.1145926   | 4.170171    | 4.085678067 | 4.268639633 | 4.1399916   |
| "Ffnb2"   | 4.2933954   | 2.903639    | 3.979728    | 3.8705809   | 4.1839689   | 4.82096575  | 4.21794695  | 4.1142387   |
| "Ffnb3"   | 2.3221366   | 2.2997465   | 2.2627816   | 2.3511941   | 2.3220758   | 2.3209991   | 2.3203487   | 2.351281    |
| "Efr3a"   | 7.023255833 | 7.105014733 | 6.951285833 | 7.065044    | 7.246338    | 7.232913333 | 7.473028167 | 7.412334233 |
| "Eftud1"  | 6.6463532   | 6.658676    | 6.619402    | 6.6387286   | 6.6786165   | 6.6691275   | 6.7670255   | 6.6639037   |
| "Eftud2"  | 6.543354625 | 6.76321185  | 6.530109375 | 6.4016362   | 6.596062075 | 6.704364025 | 6.5783846   | 6.46295755  |
| "Eg"      | 2.507709    | 2.472943    | 2.4077978   | 2.4395502   | 2.4935024   | 2.4877155   | 2.4886937   | 2.4850197   |
| "Egfbp2"  | 2.659027    | 2.634773    | 2.53646755  | 2.56700145  | 2.687005    | 2.6632711   | 2.6226226   | 2.6611421   |
| "Egfl6"   | 2.338441    | 2.309284    | 2.2458737   | 2.279433    | 2.3938558   | 2.411452    | 2.3272283   | 2.324981    |
| "Egfl7"   | 6.5981857   | 6.306254    | 6.6142399   | 6.288627825 | 6.381027575 | 6.7044026   | 6.594122275 | 6.46399335  |
| "Egfl8"   | 2.3791087   | 2.3333282   | 2.3071394   | 2.4135964   | 2.3547158   | 2.353896    | 2.3609421   | 2.350157    |
| "Egf4"    | 7.9028178   | 8.44807465  | 6.433105075 | 6.8646606   | 7.15063955  | 7.83898035  | 5.371465975 | 7.9394437   |
| "Egln1"   | 5.9982935   | 6.3251403   | 5.763256    | 6.25264635  | 6.3699668   | 6.5207985   | 6.29713825  | 5.9711308   |
| "Egln2"   | 8.927757    | 8.480984    | 8.272095    | 8.027273    | 8.398417    | 8.377197    | 7.7842526   | 7.994319    |
| "Egln3"   | 4.2409722   | 4.63621275  | 4.67479425  | 5.53992275  | 4.9728216   | 3.99887895  | 5.75538285  | 5.2772326   |
| "Egr1"    | 11.293412   | 9.255287    | 8.9547      | 10.819901   | 9.2904215   | 9.944954    | 12.344366   | 10.413212   |
| "Egr2"    | 3.16612925  | 3.1611865   | 3.0995268   | 3.443426    | 3.1873584   | 3.18416085  | 3.1476375   | 3.19545055  |
| "Ehbp1"   | 6.30713     | 5.6013517   | 6.5131845   | 6.069378    | 5.6024256   | 6.6961465   | 6.594071    | 6.677217    |
| "Ehbp1l1" | 3.1705765   | 2.74245455  | 4.20799185  | 3.54101205  | 3.23836745  | 3.04171195  | 3.6444195   | 3.34521     |
| "Ehd1"    | 6.6126034   | 6.25750795  | 6.496636625 | 6.169239525 | 6.1159972   | 6.16478195  | 6.054055775 | 5.88036575  |
| "Ehd2"    | 2.9405768   | 2.90495815  | 2.82448365  | 2.8846259   | 2.98671345  | 2.94233455  | 2.89624405  | 2.9542259   |
| "Ehd3"    | 9.3139095   | 8.18608225  | 8.642266    | 8.3861676   | 8.28259085  | 8.56408425  | 9.104831    | 8.02763315  |
| "Ehd4"    | 6.045446    | 4.800088    | 6.7408113   | 5.8923697   | 4.7668295   | 5.2576437   | 5.637126    | 4.785548    |
| "Eh"      | 2.983465133 | 2.985473033 | 2.938904833 | 2.932032167 | 3.033735267 | 3.0300491   | 2.9521365   | 3.039925533 |
| "Ehhadh"  | 12.658698   | 13.8892765  | 13.405866   | 13.8320675  | 13.705348   | 14.461355   | 14.404829   | 13.384296   |
| "Ehmt2"   | 7.2445607   | 7.450819    | 7.4437075   | 7.6719418   | 7.0876827   | 7.6177583   | 7.3384      | 7.5855994   |
| "Ei24"    | 11.259671   | 11.184277   | 10.506626   | 10.871941   | 11.235778   | 11.244054   | 10.937008   | 10.502875   |
| "Eid1"    | 7.684446    | 7.391682    | 8.604624333 | 7.649875467 | 7.115983333 | 6.983624667 | 7.896279667 | 6.872327767 |
| "Eif1"    | 13.219538   | 13.117287   | 11.909705   | 12.482715   | 13.182674   | 13.0134455  | 12.5624025  | 12.6111725  |
| "Eif1a"   | 9.803448    | 9.876151    | 9.426955    | 8.645863    | 9.352337    | 8.923263    | 8.647648    | 8.2348415   |
| "Eif1ax"  | 8.037811    | 8.1311585   | 7.9524645   | 8.07794635  | 8.189428    | 8.22473525  | 8.6213736   | 8.3734798   |
| "Eif1b"   | 8.636255    | 8.868473    | 8.912994    | 8.786477    | 8.86939     | 8.817935    | 8.593905    | 8.721423    |
| "Eif2ak1" | 4.94212535  | 5.34857065  | 4.88747535  | 5.1522568   | 4.7009793   | 4.8531762   | 4.76240455  | 5.0073675   |
| "Eif2ak2" | 5.1775025   | 5.1840739   | 5.9539535   | 5.5324125   | 5.1431625   | 4.9739425   | 5.2039653   | 5.2068962   |
| "Eif2ak3" | 5.345743    | 4.85867065  | 4.9822656   | 5.0119197   | 5.117648    | 4.81019585  | 5.014006    | 5.02827235  |
| "Eif2ak4" | 6.90371     | 6.342331    | 6.9055305   | 6.23992     | 5.680872    | 6.3589015   | 6.6287475   | 6.178117    |
| "Eif2b1"  | 7.228316    | 7.603776    | 7.042941    | 7.112757    | 7.5258684   | 7.3263297   | 6.8747067   | 7.144097    |
| "Eif2b2"  | 6.387270433 | 6.716526867 | 6.382905667 | 6.338772    | 6.6035372   | 6.582473433 | 6.332133067 | 6.4219659   |
| "Eif2b4"  | 8.407666    | 8.5914545   | 8.233537    | 8.210211    | 8.675605    | 8.955257    | 8.278336    | 8.544723    |
| "Eif2b5"  | 7.845566    | 8.189738    | 7.812892    | 8.082204    | 8.168875    | 8.452452    | 8.099852    | 8.11569     |
| "Eif2c2"  | 6.742296    | 6.6530275   | 6.5309057   | 6.1810365   | 6.6799064   | 6.700572    | 6.432562    | 6.337099    |
| "Eif2d"   | 6.332896325 | 6.329236875 | 6.48833955  | 6.42250235  | 6.683725775 | 6.619596175 | 6.555492475 | 6.5235142   |
| "Eif2s1"  | 6.49910335  | 6.7783204   | 6.531152    | 6.50134385  | 6.5413537   | 6.61866275  | 6.4745034   | 6.56733225  |
| "Eif2s2"  | 9.038248867 | 9.124470667 | 8.754587333 | 8.712380667 | 9.063203667 | 9.257944883 | 8.939571733 | 8.927643767 |
| "Eif2s3x" | 9.097034667 | 8.678831667 | 8.827981667 | 7.7981489   | 9.2004684   | 8.281101567 | 9.117932    | 8.326476567 |
| "Eif2s3y" | 2.9175963   | 10.077737   | 2.7035244   | 9.107055    | 2.9280324   | 9.600424    | 2.8103788   | 9.579367    |
| "Eif3a"   | 9.752472125 | 9.640012825 | 9.177729    | 8.9804638   | 9.44762825  | 9.789021925 | 9.2093485   | 9.494972    |
| "Eif3b"   | 8.7216835   | 9.036957    | 8.685556    | 8.445332    | 8.953838    | 8.828096    | 8.441018    | 8.653229    |
| "Eif3c"   | 10.6095975  | 10.8371865  | 10.40414788 | 10.3978825  | 10.875835   | 11.082821   | 10.41294675 | 10.6270875  |
| "Eif3d"   | 9.671136    | 10.039047   | 9.690827    | 9.501563    | 9.98325     | 10.016561   | 9.608121    | 9.656976    |
| "Eif3e"   | 9.7811375   | 9.8072158   | 9.38925785  | 9.29422475  | 9.783244175 | 9.7928033   | 9.338089925 | 9.52059     |
| "Eif3f"   | 11.12113    | 11.082918   | 10.654008   | 10.517161   | 10.846377   | 10.937353   | 10.39322    | 10.5756235  |
| "Eif3g"   | 10.273748   | 10.436924   | 9.960542    | 9.668218    | 10.208583   | 10.365971   | 9.751285    | 9.736126    |
| "Eif3h"   | 7.0148985   | 6.98724175  | 6.83292035  | 6.7464937   | 6.85851525  | 6.99443225  | 6.669036    | 6.7784091   |
| "Eif3i"   | 11.4359195  | 11.6246125  | 11.2691345  | 11.2203095  | 11.3319075  | 11.572871   | 11.326608   | 11.454524   |
| "Eif3j"   | 9.164824    | 9.135898    | 8.327061167 | 8.675885167 | 9.091977667 | 9.324926333 | 8.772483    | 8.852607333 |
| "Eif3k"   | 9.8236475   | 9.974479    | 9.557644    | 9.46035     | 9.559757    | 9.887497    | 9.367583    | 9.601707    |
| "Eif3l"   | 5.4663767   | 5.621398567 | 5.471627233 | 5.480042667 | 5.756600733 | 5.792989067 | 5.5645781   | 5.716307467 |
| "Eif3m"   | 6.8322811   | 6.92873735  | 6.4503525   | 6.48184385  | 6.785264    | 6.869579    | 6.52760395  | 6.5756515   |

|             |             |             |             |             |             |             |             |             |
|-------------|-------------|-------------|-------------|-------------|-------------|-------------|-------------|-------------|
| "Eif4a1"    | 11.03124633 | 11.07469367 | 10.78512017 | 10.37401967 | 10.82021183 | 11.12922833 | 10.48589467 | 10.89518833 |
| "Eif4a2"    | 12.798919   | 12.719645   | 11.891885   | 12.666825   | 12.295992   | 12.805644   | 12.241509   | 12.433004   |
| "Eif4a3"    | 9.527648    | 9.189016    | 8.876292    | 8.867206    | 9.087306    | 9.032018    | 8.847769    | 8.956       |
| "Eif4b"     | 8.5949531   | 8.8003805   | 8.28205733  | 8.559819667 | 9.102781333 | 9.125577067 | 8.148483    | 8.685195833 |
| "Eif4e"     | 6.471120667 | 7.000244167 | 7.178599    | 6.6075847   | 6.778191433 | 6.494953433 | 6.643865367 | 6.313122567 |
| "Eif4e2"    | 5.947448567 | 6.514190067 | 6.037014267 | 5.968665    | 6.259812433 | 5.957088233 | 5.987725967 | 6.010034333 |
| "Eif4e3"    | 5.53468275  | 5.3095685   | 7.2855913   | 7.849117    | 5.43487325  | 4.94972085  | 5.3450305   | 5.5127535   |
| "Eif4ebp1"  | 8.194260667 | 8.315106433 | 7.241766767 | 7.4454202   | 7.402000167 | 7.665450867 | 7.057804033 | 7.342148067 |
| "Eif4ebp2"  | 5.4774132   | 5.5403853   | 5.516548075 | 5.635056925 | 5.49310245  | 5.4658355   | 5.674679475 | 5.794518375 |
| "Eif4enif1" | 7.537916    | 7.452641    | 7.6056914   | 7.146422    | 7.3696017   | 7.800768    | 7.0413404   | 7.498064    |
| "Eif4g1"    | 6.186984333 | 6.322857333 | 6.217096433 | 6.316211233 | 6.490881133 | 6.3508674   | 6.234588567 | 6.3439049   |
| "Eif4g2"    | 9.210004    | 9.0166925   | 8.704390525 | 8.68808125  | 9.1144402   | 9.2470035   | 9.0259615   | 9.07246165  |
| "Eif4g3"    | 8.842834    | 9.259471    | 8.755302    | 8.667033    | 8.909651    | 9.214127    | 8.6335945   | 8.706083    |
| "Eif4h"     | 11.176854   | 11.16687033 | 10.82477767 | 10.189182   | 11.05385633 | 11.021879   | 10.92317167 | 10.84565867 |
| "Eif5"      | 11.44525025 | 10.97267813 | 10.010327   | 10.50554538 | 10.73989175 | 11.43198275 | 10.78269425 | 11.1070175  |
| "Eif5a"     | 11.0321265  | 11.2482205  | 11.213064   | 11.1328605  | 11.1734985  | 11.072733   | 11.0216     | 11.1881655  |
| "Eif5b"     | 6.602664567 | 6.577310567 | 6.71808     | 6.607132767 | 6.689874167 | 6.393167833 | 6.503719233 | 6.490671367 |
| "Eif6"      | 9.460304    | 9.338022    | 9.202957    | 8.779633    | 9.361057    | 9.067509    | 8.155857    | 8.491752    |
| "Elac1"     | 3.4635036   | 4.730632    | 4.4574075   | 3.4493263   | 3.948614    | 4.019648    | 4.417723    | 3.0515766   |
| "Elac2"     | 5.5161729   | 5.519544567 | 5.2598169   | 5.160863667 | 5.359903867 | 5.513347    | 5.1509251   | 5.0903136   |
| "Elavl1"    | 8.1621905   | 7.7372667   | 8.3286023   | 8.1070248   | 7.864252    | 8.363779    | 8.2851588   | 8.2037723   |
| "Elavl2"    | 2.5916483   | 2.557757    | 2.4717505   | 2.50934805  | 2.5886538   | 2.5895382   | 2.56861035  | 2.58700215  |
| "Elavl3"    | 2.4177818   | 2.3888118   | 2.3153267   | 2.3491518   | 2.4137764   | 2.412052    | 2.4045458   | 2.4627132   |
| "Elavl4"    | 2.489037433 | 2.561566067 | 2.386304067 | 2.4660961   | 2.506078333 | 2.497128    | 2.4760317   | 2.491815633 |
| "Elf1"      | 8.047752    | 7.4381604   | 7.8749466   | 7.646609    | 7.6350155   | 7.225359    | 8.264402    | 7.755455    |
| "Elf2"      | 7.9208933   | 6.9219465   | 6.58582915  | 7.0287969   | 6.9569595   | 7.1005275   | 6.535184    | 6.9724192   |
| "Elf3"      | 2.431964    | 2.3774273   | 3.6915288   | 2.3874698   | 2.4120655   | 2.3990493   | 2.4184573   | 2.3988254   |
| "Elk1"      | 3.5860476   | 3.3247166   | 2.974232    | 3.2081773   | 3.4538262   | 3.2375088   | 3.1480596   | 3.2431562   |
| "Elk3"      | 5.0104441   | 4.529068667 | 5.100078    | 5.0575468   | 4.787049733 | 4.7732706   | 5.5856317   | 5.198268567 |
| "Elk4"      | 9.87097     | 10.1064415  | 9.289133    | 9.709184    | 9.76161     | 9.836237    | 9.327147    | 9.723465    |
| "ElI"       | 6.9031262   | 6.851769    | 7.254236    | 6.9626336   | 6.80104     | 6.4398775   | 6.444594    | 6.8586173   |
| "ElI2"      | 12.447453   | 10.874538   | 9.9183235   | 10.3965645  | 10.4850445  | 11.031448   | 10.987684   | 10.318705   |
| "Elmo1"     | 2.2453041   | 2.20400725  | 2.58867845  | 2.19161725  | 2.2425747   | 2.221045    | 2.2351755   | 2.22704625  |
| "Elmo2"     | 3.2955804   | 2.5528188   | 2.5112891   | 2.4958987   | 2.5042982   | 2.5369673   | 2.5130184   | 2.5341551   |
| "Elmo3"     | 6.1009946   | 6.0902762   | 6.192564    | 6.0705633   | 6.446532    | 6.458313    | 6.0266113   | 6.346092    |
| "Elmod3"    | 2.6085603   | 2.5894675   | 2.5345495   | 2.5410523   | 2.8262162   | 2.7139993   | 2.5988004   | 2.6061208   |
| "Eln"       | 3.205725    | 3.3885522   | 3.4170315   | 3.1225252   | 3.2906249   | 2.82084     | 3.2803292   | 3.381473    |
| "Elof1"     | 7.606659    | 7.714475    | 7.567011    | 7.6853538   | 7.7149973   | 7.750416    | 7.504765    | 7.646654    |
| "Elov1"     | 7.4146505   | 7.479474667 | 8.484021333 | 7.925039    | 6.838658167 | 7.5464533   | 6.842336    | 7.695517833 |
| "Elov12"    | 11.317612   | 11.191951   | 11.006372   | 11.211482   | 11.284367   | 11.585477   | 12.506355   | 12.31027    |
| "Elov13"    | 2.3082418   | 5.290841    | 2.2059295   | 2.7410462   | 3.0558555   | 2.7755356   | 4.2723207   | 5.652359    |
| "Elov14"    | 2.7361913   | 2.7450402   | 2.6096761   | 2.6500616   | 2.7383828   | 2.748831    | 2.7137947   | 2.8447032   |
| "Elov15"    | 12.4719525  | 12.597215   | 11.952137   | 11.988315   | 12.5925455  | 12.5044485  | 12.7812455  | 12.2110205  |
| "Elov16"    | 6.32203745  | 6.9894509   | 8.08277115  | 8.5321775   | 9.471584    | 6.0505121   | 8.2418427   | 9.431074    |
| "Elov17"    | 2.7214017   | 2.728657    | 2.95565925  | 2.69995435  | 2.75037775  | 2.7596521   | 2.738444    | 2.74188495  |
| "Elp2"      | 7.2334315   | 7.3440393   | 7.35703335  | 7.2458635   | 7.45290135  | 7.329862    | 7.011734    | 7.1638592   |
| "Elp3"      | 4.893864833 | 5.336842167 | 5.027886833 | 5.135403933 | 5.089798767 | 4.9391225   | 4.886759767 | 4.9928995   |
| "Elp4"      | 4.1949215   | 4.6557248   | 5.18715815  | 4.8818643   | 4.93245555  | 4.69430335  | 5.54064035  | 5.5906707   |
| "Eltd1"     | 7.04527305  | 6.0820193   | 6.74588705  | 6.8974824   | 6.6753056   | 6.8219623   | 7.1554405   | 6.8027202   |
| "Emb"       | 2.25346785  | 2.1402568   | 2.85679875  | 2.130327    | 2.1654731   | 2.15302455  | 2.1676383   | 2.144691    |
| "Emcn"      | 4.2604494   | 3.9903243   | 4.2030435   | 4.299357    | 4.2218356   | 3.9695146   | 5.039055    | 3.8742087   |
| "Emd"       | 7.623795    | 6.925677    | 6.497337    | 6.360653    | 6.258874    | 6.7877254   | 6.447192    | 6.119431    |
| "Emg1"      | 10.048349   | 10.070758   | 10.166955   | 10.20024    | 10.044457   | 10.29899    | 10.324946   | 10.4122095  |
| "Emilin1"   | 4.8240967   | 4.0846287   | 5.0149017   | 4.5824095   | 4.3417045   | 4.1005589   | 4.615527    | 4.430865    |
| "Emilin3"   | 2.6213949   | 2.5851505   | 2.8710275   | 2.5583472   | 2.613792    | 2.711381    | 2.588584    | 2.60743     |
| "EmI3"      | 4.521766    | 4.797178    | 4.2772303   | 4.488466    | 4.802442    | 5.2953815   | 4.959663    | 4.864452    |
| "EmI5"      | 3.387944633 | 3.627785733 | 3.226329133 | 3.316869733 | 3.424385    | 3.599723033 | 3.388275933 | 3.446641067 |
| "Emp1"      | 4.4626074   | 3.5563347   | 3.782969    | 3.5249932   | 3.471067    | 3.5646396   | 3.6548476   | 3.4757278   |
| "Emp2"      | 4.731893    | 3.08587135  | 5.3332318   | 4.0712127   | 4.4915899   | 3.8699706   | 5.7679888   | 4.64523185  |
| "Emp3"      | 6.3112135   | 5.8798947   | 6.5166836   | 6.1241393   | 5.932479    | 5.543907    | 5.783726    | 5.8929186   |
| "Emr1"      | 10.309072   | 7.77054     | 10.444767   | 9.636211    | 8.58341     | 8.4586315   | 9.694615    | 9.112841    |
| "Emr4"      | 9.17205275  | 6.754524    | 9.0334625   | 8.4648985   | 7.2939095   | 6.6443475   | 8.149625    | 7.814007    |
| "En1"       | 2.3849216   | 2.3618364   | 2.3014069   | 2.3174574   | 2.3839722   | 2.3760476   | 2.3750443   | 2.3691983   |
| "En2"       | 2.5732439   | 2.5436096   | 2.4511838   | 2.5473974   | 2.5779965   | 2.565919    | 2.558423    | 2.5804768   |
| "Enah"      | 2.443693733 | 2.409676867 | 2.359777933 | 2.390669467 | 2.4360168   | 2.462427867 | 2.558941533 | 2.4260485   |
| "Enc1"      | 5.951695467 | 4.344133067 | 4.158498567 | 4.49808     | 4.410816133 | 4.5049729   | 4.674245667 | 4.012368433 |
| "Endod1"    | 3.218579867 | 3.060875433 | 3.1885529   | 2.986304467 | 3.1064013   | 3.079434    | 3.0815508   | 3.074211833 |
| "Endog"     | 9.8663435   | 10.60306925 | 9.8452395   | 10.107693   | 10.1556895  | 10.239487   | 9.7089515   | 9.8257355   |
| "Endou"     | 2.1267316   | 2.0914042   | 2.04471     | 2.0773308   | 2.112177    | 2.1011026   | 2.4494414   | 2.0993438   |
| "Eng"       | 7.46966185  | 6.925205    | 7.200834    | 7.41884715  | 7.49354585  | 7.19985435  | 7.6089395   | 7.19725815  |
| "Eno1"      | 9.00252     | 10.20382633 | 9.862977333 | 10.244325   | 10.92896867 | 10.35050833 | 10.65502417 | 10.39144417 |
| "Eno2"      | 2.4182      | 2.4022975   | 2.337455    | 2.364055    | 2.417347    | 2.4116886   | 2.4069498   | 2.405609    |
| "Eno3"      | 4.361696    | 5.022423    | 4.3613048   | 4.580464    | 5.2189593   | 5.096434    | 4.459213    | 4.5408006   |
| "Enoph1"    | 5.69354825  | 5.24935815  | 5.4251175   | 5.0284048   | 5.0713605   | 4.7822826   | 5.38179335  | 4.98753165  |
| "Enox2"     | 4.81727505  | 5.1516558   | 5.457087    | 5.66691945  | 5.1564533   | 5.13632135  | 5.6776061   | 5.4269595   |
| "Enpep"     | 11.030541   | 10.451634   | 10.968076   | 11.502038   | 11.908914   | 10.768007   | 11.771067   | 11.52649    |
| "Enpp1"     | 7.6149228   | 7.05776045  | 7.66451955  | 7.39433525  | 7.91454005  | 7.65152275  | 7.96433185  | 7.8596875   |
| "Enpp2"     | 6.6601629   | 7.7302733   | 7.45769015  | 7.820348    | 7.12481165  | 7.27230485  | 7.1577903   | 7.3943152   |
| "Enpp3"     | 6.80992555  | 6.2393586   | 6.3650088   | 7.15935555  | 6.271482225 | 6.56199235  | 6.521753975 | 7.560708425 |
| "Enpp4"     | 6.1688747   | 6.140565    | 6.7583423   | 6.117894    | 5.951955    | 6.0257635   | 6.1787712   | 6.1376762   |
| "Enpp5"     | 5.8191605   | 6.6145325   | 7.049116    | 8.068964    | 6.2551723   | 6.7412      | 7.2713437   | 7.542382    |

|             |             |             |             |             |             |             |             |             |
|-------------|-------------|-------------|-------------|-------------|-------------|-------------|-------------|-------------|
| "Ensa"      | 6.59435625  | 6.6217392   | 6.86972765  | 6.89135085  | 6.56806945  | 6.70767645  | 6.8165465   | 6.79474855  |
| "Entpd1"    | 4.3993718   | 3.0747575   | 3.7963003   | 3.2735946   | 3.27984345  | 3.2720998   | 3.2877945   | 3.2653508   |
| "Entpd2"    | 5.0818534   | 4.6085362   | 5.3283954   | 4.920198    | 4.679375    | 4.5881777   | 4.7531743   | 4.6628447   |
| "Entpd4"    | 6.459538    | 6.87194705  | 7.024695    | 6.91215325  | 6.9286705   | 6.2614827   | 7.69797265  | 7.4970938   |
| "Entpd5"    | 7.819549025 | 8.79300775  | 9.049138825 | 9.126925125 | 8.785808875 | 7.8842408   | 8.6769839   | 8.50301425  |
| "Entpd6"    | 2.17888     | 2.1447086   | 2.1152768   | 2.1263661   | 2.1649995   | 2.154604    | 2.1702933   | 2.4199827   |
| "Entpd7"    | 2.70704105  | 2.8287102   | 2.71999475  | 2.7016108   | 2.8915168   | 2.7059569   | 2.65497855  | 2.71881375  |
| "Eny2"      | 7.078620525 | 7.1284068   | 6.80610415  | 6.738750725 | 6.924744425 | 6.83923565  | 7.00107585  | 6.807302625 |
| "Eogt"      | 5.5721648   | 4.86321615  | 5.2780625   | 5.25046985  | 5.19139015  | 5.4992747   | 5.4057167   | 5.32360885  |
| "Eomes"     | 2.6559377   | 2.6221025   | 2.6343055   | 2.5864701   | 2.6494498   | 2.6479042   | 2.484554    | 2.644329    |
| "Ep400"     | 6.6953006   | 6.401105    | 6.4885554   | 6.3755274   | 6.503106    | 6.279661    | 6.338193    | 6.305779    |
| "Epas1"     | 3.0241292   | 2.3770032   | 3.7143981   | 2.5482242   | 2.4671667   | 2.7056623   | 3.2169797   | 3.338803    |
| "Epb4.1"    | 8.059277    | 9.314723    | 7.613457    | 7.8887835   | 8.686627    | 8.679762    | 7.662402    | 7.6741877   |
| "Epb4.1l1"  | 2.1503465   | 2.0368897   | 2.35453165  | 2.1045661   | 2.1404684   | 2.1219137   | 2.0744284   | 2.1189965   |
| "Epb4.1l2"  | 5.28651065  | 4.4368614   | 5.34338475  | 5.34910475  | 4.87551285  | 4.9065147   | 5.1927488   | 5.06944465  |
| "Epb4.1l3"  | 6.50336785  | 3.88516155  | 7.041095    | 6.05562275  | 5.083917    | 4.6646812   | 5.7706387   | 5.32436395  |
| "Epb4.1l4b" | 7.7688837   | 9.045666    | 8.093993    | 8.882702    | 8.945202    | 8.374802    | 8.726013    | 9.275291    |
| "Epb4.1l5"  | 7.627693    | 7.1683326   | 7.452055    | 7.2655888   | 7.1480665   | 7.73063     | 7.5693274   | 8.179795    |
| "Epb4.2"    | 3.076848    | 3.0351496   | 2.84006     | 2.922259    | 3.1719048   | 3.1238313   | 2.9852247   | 3.216947    |
| "Epc1"      | 7.1719236   | 7.3795466   | 7.5944366   | 7.5611987   | 7.930905    | 7.898871    | 7.5862207   | 7.911795    |
| "Epcam"     | 2.7621508   | 2.7634282   | 2.742063    | 3.5900693   | 2.7813487   | 2.750252    | 3.0928795   | 2.9877853   |
| "Epdr1"     | 2.8270085   | 2.5773976   | 3.49146     | 2.6115117   | 2.6727657   | 2.6695573   | 2.597651    | 2.6690457   |
| "Epha1"     | 5.0925536   | 5.63829     | 6.033611    | 6.8505635   | 5.8137474   | 5.4767065   | 6.576302    | 7.284817    |
| "Epha2"     | 4.6275234   | 3.2005303   | 2.7727804   | 2.8465858   | 2.8385787   | 3.1873212   | 2.8827267   | 2.8547416   |
| "Epha3"     | 2.722027467 | 2.7005016   | 2.6330325   | 2.657349033 | 2.735448967 | 2.734466633 | 2.7013095   | 2.744420833 |
| "Epha4"     | 2.7514627   | 2.81576005  | 2.6674819   | 2.727031    | 2.74518015  | 2.7388892   | 2.7005577   | 2.82241485  |
| "Epha5"     | 2.62794385  | 2.5988892   | 2.5415063   | 2.5596516   | 2.6235577   | 2.68896775  | 2.60306505  | 2.6143795   |
| "Epha7"     | 2.7445685   | 2.735197933 | 2.760155767 | 2.727159833 | 2.7777528   | 2.7744357   | 2.9908391   | 2.770406867 |
| "Epha8"     | 2.7982063   | 2.7623072   | 2.6612122   | 2.7514415   | 2.7986934   | 2.799082    | 2.7539463   | 2.7701244   |
| "Ephb2"     | 2.4005233   | 2.38447635  | 2.34552935  | 2.3649238   | 2.4018233   | 2.4060884   | 2.39992935  | 2.39591845  |
| "Ephb3"     | 2.5689769   | 2.570291    | 2.569362    | 2.5816433   | 2.601256    | 2.576592    | 2.557575    | 2.706025    |
| "Ephb4"     | 2.4718256   | 2.7078831   | 2.9935527   | 2.6719298   | 2.7298765   | 3.0716789   | 2.7357416   | 2.7150135   |
| "Ephx1"     | 10.521449   | 11.400837   | 11.4829235  | 10.996194   | 12.07143    | 11.495106   | 11.693703   | 10.688317   |
| "Ephx2"     | 12.402101   | 13.192264   | 12.149014   | 12.466684   | 13.290265   | 13.467906   | 12.835576   | 13.031913   |
| "Epm2aip1"  | 3.4073565   | 2.5293648   | 2.4923115   | 2.482878    | 2.5570514   | 2.5512064   | 2.524924    | 2.5481398   |
| "Epn1"      | 6.494228    | 6.587694    | 6.554351    | 6.5876145   | 6.702865    | 6.7327394   | 6.60799     | 6.7066526   |
| "Epn2"      | 5.2218897   | 4.6052389   | 4.3587899   | 4.1830165   | 4.44446535  | 4.4833645   | 4.3608197   | 4.5337753   |
| "Epor"      | 3.6951194   | 3.6923537   | 3.6607344   | 3.6614122   | 3.685386    | 3.8832767   | 3.6306036   | 3.6682727   |
| "Eppk1"     | 6.7435      | 7.7477794   | 6.472146    | 5.3415637   | 6.0602994   | 5.94945     | 4.9793596   | 5.9713664   |
| "Eprs"      | 10.70685633 | 9.913094    | 9.9316995   | 9.764305333 | 9.900840333 | 10.19659633 | 9.8627995   | 9.961210667 |
| "Eps15"     | 7.8029088   | 7.5916675   | 7.02087185  | 7.227096    | 7.2316142   | 7.88681975  | 6.82455     | 7.2247028   |
| "Eps15l1"   | 3.92541435  | 3.984333    | 4.28183425  | 3.6946349   | 3.8236774   | 3.74404685  | 3.80771285  | 3.5261897   |
| "Eps8"      | 3.922562367 | 3.5643444   | 3.4779859   | 3.386609633 | 3.623942    | 3.605047133 | 3.743245067 | 3.507824967 |
| "Eps8l2"    | 4.334183    | 4.3279505   | 4.232709    | 4.50162     | 2.9593167   | 5.293147    | 5.6986275   | 4.6477747   |
| "Epsti1"    | 6.3212453   | 4.8765015   | 7.035131    | 6.27691     | 5.0144305   | 5.0175121   | 5.9406752   | 5.475708    |
| "Epyc"      | 2.758893    | 2.726669    | 2.6819644   | 2.6454155   | 2.7451057   | 2.7357476   | 2.6922503   | 2.8566053   |
| "Eral1"     | 4.32514636  | 4.39736754  | 4.38314638  | 4.50054444  | 4.5345122   | 4.54704764  | 4.59020724  | 4.47559392  |
| "Erap1"     | 8.699874    | 8.891745    | 9.055844    | 8.876988    | 8.479601    | 8.506784    | 8.550675    | 8.748483    |
| "Eras"      | 3.0556471   | 3.0329082   | 2.9314308   | 2.955016    | 3.0948944   | 3.0944786   | 2.9889157   | 3.1047425   |
| "Erbb2ip"   | 7.241781833 | 7.114476133 | 6.969700633 | 6.824371333 | 7.197170333 | 7.261913967 | 7.332845833 | 6.841787133 |
| "Erbb3"     | 6.5514368   | 6.54324265  | 6.45218075  | 6.6403278   | 6.37521135  | 6.6940479   | 6.550546    | 6.5037831   |
| "Erbb4"     | 3.2014804   | 3.1944344   | 3.0274734   | 3.0533497   | 3.2845137   | 3.2959821   | 3.1660385   | 3.3325143   |
| "Ercl1"     | 4.391336333 | 4.806060233 | 4.242353    | 4.314918267 | 4.3367744   | 4.462251633 | 4.062710067 | 4.3219588   |
| "Ercc1"     | 4.145831    | 4.273041    | 4.8756733   | 4.231249    | 4.375391    | 4.6543903   | 5.185355    | 4.0788455   |
| "Ercc2"     | 2.8365412   | 2.8139193   | 2.7864053   | 2.8415058   | 2.8340948   | 2.8443506   | 2.841272    | 2.8395019   |
| "Ercc3"     | 6.2366204   | 6.9960837   | 6.491487    | 7.095709    | 6.5108395   | 6.0898438   | 5.8742547   | 6.6849723   |
| "Ercc4"     | 2.59776585  | 2.56122145  | 2.817816    | 2.52480525  | 2.55860815  | 2.5788437   | 2.6006125   | 2.57556715  |
| "Ercc5"     | 8.23846     | 7.6281576   | 7.3875713   | 7.6308503   | 7.6804633   | 8.148454    | 7.2727294   | 7.748131    |
| "Ercc8"     | 2.986978767 | 2.9170795   | 2.9295628   | 3.0050793   | 2.952326733 | 2.960780233 | 2.837194767 | 3.0410219   |
| "Erdr1"     | 10.217815   | 10.306938   | 10.787025   | 9.386354    | 10.924823   | 10.61899    | 9.29243     | 9.374379    |
| "Ereg"      | 3.0856056   | 3.0540895   | 3.2484643   | 3.0389223   | 3.085597    | 3.1072884   | 3.0670035   | 3.0997465   |
| "Erf"       | 4.7486403   | 4.662751    | 4.2354164   | 4.69308805  | 4.3221829   | 4.50878625  | 4.2279053   | 4.675311    |
| "Ergic1"    | 4.574952375 | 5.1895765   | 4.957562475 | 5.4261256   | 5.225597975 | 4.97178405  | 5.35099115  | 5.27752875  |
| "Ergic2"    | 7.5810869   | 7.952244567 | 7.237159433 | 7.573962467 | 7.472758233 | 7.623394    | 7.401342767 | 7.749702433 |
| "Ergic3"    | 7.316182633 | 7.6754158   | 7.600818933 | 7.904900067 | 7.884448233 | 7.520595733 | 7.776009267 | 7.8943772   |
| "Erh"       | 9.206273    | 9.343014    | 9.378738    | 8.941893    | 9.238157    | 9.170821    | 8.989201    | 9.042931    |
| "Eri1"      | 5.46933055  | 5.0055285   | 5.42892245  | 5.48771025  | 4.43040085  | 5.2529182   | 5.57373925  | 5.5552537   |
| "Eri2"      | 3.576084    | 4.0058632   | 3.656498233 | 3.780201767 | 3.864370167 | 3.983182267 | 4.267077067 | 3.9647511   |
| "Eri3"      | 4.992297    | 5.259931    | 4.9486094   | 4.8184805   | 5.2652493   | 4.6831393   | 4.9816527   | 4.961718    |
| "Erlec1"    | 7.4851783   | 7.73163835  | 7.78427635  | 7.85437475  | 7.95840925  | 7.8346095   | 7.603422    | 7.6999782   |
| "Erln1"     | 5.0549574   | 5.1616193   | 5.9084039   | 5.93523415  | 5.1359753   | 5.6239165   | 5.82851645  | 6.3771896   |
| "Emp1"      | 6.836749    | 8.099651    | 9.101448    | 8.428201    | 8.119074    | 7.929121    | 8.08095     | 7.515807    |
| "Ernl"      | 2.8643208   | 2.8306093   | 2.7896924   | 2.8452666   | 2.838523    | 2.835662    | 2.8043518   | 2.8581402   |
| "Erol1"     | 5.262694333 | 5.437676267 | 5.468399267 | 5.092111333 | 5.252117467 | 5.513159233 | 5.284503    | 5.262175    |
| "Erol1b"    | 5.808492333 | 6.247075567 | 5.444011733 | 6.251399767 | 7.0916413   | 6.519524033 | 6.1446342   | 6.496110767 |
| "Erp29"     | 9.044357    | 8.853903    | 9.202356    | 8.667671    | 8.887192    | 8.944112    | 8.582205    | 8.7632      |
| "Erp44"     | 7.8899502   | 7.9006621   | 7.90714865  | 7.7556732   | 8.3357203   | 7.6894508   | 8.1608247   | 8.01742025  |
| "Errf1"     | 12.9453455  | 12.699424   | 11.7736215  | 11.8707245  | 12.8782115  | 12.8597055  | 12.06428975 | 12.365366   |
| "Esam"      | 7.8963575   | 7.0591373   | 7.2812347   | 6.887709    | 7.2211204   | 7.4838305   | 7.2229714   | 6.7394547   |
| "Esco1"     | 7.8000673   | 7.4762013   | 7.4708315   | 7.7314738   | 7.6857115   | 7.62054635  | 7.789312    | 7.61102185  |
| "Esd"       | 12.424707   | 12.554643   | 13.580581   | 13.091413   | 12.615497   | 12.203717   | 12.621518   | 12.659048   |

|           |             |             |             |             |             |             |             |             |
|-----------|-------------|-------------|-------------|-------------|-------------|-------------|-------------|-------------|
| "Esf1"    | 8.1485472   | 7.72292495  | 7.44011     | 7.4328113   | 7.5998755   | 7.94587375  | 7.94322415  | 7.60591125  |
| "Esm1"    | 5.034972    | 3.238936    | 7.3434887   | 5.1054387   | 3.8671963   | 6.827493    | 4.9352846   | 4.33097     |
| "Espn"    | 2.755073    | 2.7438788   | 2.6131248   | 2.676196    | 2.7620451   | 2.8191097   | 2.7654753   | 2.7468724   |
| "Esrp2"   | 6.16831205  | 6.98727665  | 6.5831055   | 6.48543215  | 6.7157723   | 7.029072    | 7.2054405   | 6.7360455   |
| "Esrra"   | 5.7427716   | 6.337516    | 5.641994    | 6.02617     | 6.0533566   | 6.8654847   | 5.456814    | 5.9212127   |
| "Esrrg"   | 2.1187475   | 2.0846255   | 2.0484247   | 2.067165    | 2.1042273   | 2.4318218   | 2.1034222   | 2.0893092   |
| "Esx1"    | 2.6864717   | 2.6539135   | 2.607545    | 2.632588    | 2.673348    | 2.678413    | 2.667698    | 2.6656032   |
| "Esys1"   | 4.618223    | 4.4406743   | 5.489661    | 5.2167783   | 4.665329    | 4.8752155   | 5.10816     | 4.607673    |
| "Esys3"   | 2.746793    | 2.7037327   | 2.6722672   | 2.6752505   | 3.0728798   | 2.723454    | 2.711507    | 2.722119    |
| "Etaa1"   | 6.0159082   | 4.127479    | 4.775276    | 5.162536    | 4.716155    | 5.015083    | 5.3266068   | 5.320129    |
| "Etf1"    | 6.6611832   | 6.72995736  | 6.25102106  | 6.22384426  | 6.59445786  | 6.61327544  | 6.31299104  | 6.42962878  |
| "Etf2"    | 11.570244   | 11.913967   | 11.911656   | 12.009441   | 12.187722   | 12.041353   | 12.456877   | 12.483071   |
| "Etfb"    | 10.866322   | 11.971528   | 11.441624   | 11.7799     | 12.227975   | 12.220542   | 11.951762   | 12.011999   |
| "Etfdh"   | 11.377239   | 12.463221   | 11.352126   | 11.775503   | 12.417179   | 12.380612   | 12.138859   | 12.054166   |
| "Eth1"    | 8.622411    | 10.144527   | 10.157169   | 10.498859   | 9.893065    | 9.388334    | 10.7628765  | 9.978659    |
| "Etld"    | 4.797931    | 4.758165    | 5.685308    | 5.2527356   | 4.4502206   | 4.068223    | 5.7564726   | 5.4154196   |
| "Etnk1"   | 5.872365233 | 5.745867067 | 6.009073967 | 5.7950595   | 5.896056967 | 5.918505    | 5.852041    | 6.311116067 |
| "Etohd2"  | 3.2480648   | 3.3991106   | 3.1963842   | 3.2683995   | 3.3281038   | 3.3965912   | 3.41909     | 3.659503    |
| "Ets1"    | 6.896982633 | 6.200657    | 6.7571102   | 6.5732121   | 6.7709607   | 6.688102667 | 7.317953067 | 6.575309333 |
| "Ets2"    | 12.0440235  | 9.168407    | 9.388492    | 9.399156    | 9.255419    | 9.252502    | 8.897116    | 8.667539    |
| "Etv1"    | 3.032216    | 2.9988565   | 2.8925607   | 2.9720767   | 3.0202708   | 3.0357976   | 3.0090989   | 3.0309222   |
| "Etv3"    | 5.155889933 | 4.885981333 | 4.7982656   | 4.839070067 | 4.980373867 | 5.015639033 | 4.912091333 | 4.826392233 |
| "Etv5"    | 2.5273467   | 2.4959697   | 2.44646645  | 2.47668175  | 2.51779995  | 2.5085882   | 2.5083395   | 2.57902145  |
| "Etv6"    | 3.1137724   | 2.6434658   | 2.6264985   | 2.6129775   | 2.667725    | 2.6606894   | 2.6777058   | 2.6811118   |
| "Evc"     | 2.3802396   | 2.3476566   | 2.3180189   | 2.31711195  | 2.3807305   | 2.3605251   | 2.3719039   | 2.35522855  |
| "Evi2a"   | 3.88105095  | 3.34693165  | 4.6718919   | 4.3743497   | 3.61805725  | 3.5652186   | 3.96998845  | 3.87840355  |
| "Evi2b"   | 5.8062506   | 4.6918254   | 6.7461324   | 6.174331    | 4.3596497   | 5.3294163   | 5.642025    | 5.305301    |
| "Evis"    | 10.4702905  | 10.510656   | 10.7127385  | 10.91828525 | 10.5958745  | 11.0619995  | 11.1062995  | 10.98497425 |
| "Evl"     | 6.59657725  | 5.0377948   | 7.52170635  | 6.48389725  | 6.2745008   | 5.79349785  | 6.7646599   | 6.1415539   |
| "Evpl"    | 2.467343    | 2.4372349   | 2.3849149   | 2.42108     | 2.4619088   | 2.5984118   | 2.4517968   | 2.4344108   |
| "Ewsr1"   | 6.776995933 | 6.968470833 | 6.934484567 | 6.737221333 | 7.096626667 | 6.7435431   | 6.934815067 | 6.723899633 |
| "Exd2"    | 4.3704834   | 4.092431    | 4.1697855   | 4.759734    | 4.055048    | 4.546098    | 4.373298    | 4.025339    |
| "Exo1"    | 2.517964    | 2.4826608   | 2.4232614   | 2.452958    | 2.5138705   | 2.4964833   | 2.510937    | 2.4913278   |
| "Exoc1"   | 6.149843    | 6.1205287   | 6.1971545   | 6.218995    | 6.178053    | 6.138481    | 6.337992    | 6.122863    |
| "Exoc4"   | 5.18176464  | 4.99332746  | 5.2434048   | 5.49399456  | 5.36151718  | 5.36373902  | 5.55667948  | 5.35945894  |
| "Exoc6"   | 6.78886975  | 6.851847675 | 6.202980525 | 6.3767093   | 6.6252579   | 6.563549    | 6.229397475 | 6.45926765  |
| "Exoc7"   | 6.964691    | 7.5557184   | 7.5172906   | 7.4517303   | 7.652493    | 7.164405    | 7.4453964   | 7.554599    |
| "Exoc8"   | 5.154957    | 5.985903    | 5.9176655   | 5.7528667   | 5.952421    | 6.3457394   | 6.054589    | 6.045136    |
| "Exosc1"  | 5.73056485  | 5.4248188   | 5.10526555  | 5.01118185  | 5.35644795  | 5.2809028   | 5.05545485  | 5.07872915  |
| "Exosc10" | 6.002561567 | 5.9677349   | 5.988584333 | 5.892920333 | 6.010508467 | 6.0101074   | 6.0226385   | 5.905989467 |
| "Exosc2"  | 6.2076077   | 6.3724093   | 6.1008334   | 5.845055    | 6.2475586   | 6.1587567   | 6.093882    | 6.163847    |
| "Exosc4"  | 6.583189467 | 6.9743791   | 6.621952667 | 6.490721367 | 6.830929433 | 6.834795033 | 6.572473033 | 6.678105333 |
| "Exosc5"  | 6.280613    | 7.054898    | 6.3539243   | 6.434464    | 6.5391393   | 6.7262964   | 6.3099217   | 6.331561    |
| "Exosc7"  | 7.7035      | 8.387922    | 8.588328    | 8.421973    | 8.510779    | 8.353438    | 8.419444    | 8.43663     |
| "Exosc8"  | 3.5487247   | 3.5196252   | 3.4741306   | 3.5219254   | 3.5331602   | 3.5222692   | 3.5402815   | 3.492889    |
| "Exosc9"  | 8.335203    | 8.5827675   | 8.242933    | 7.9017525   | 8.146618    | 8.442958    | 8.260817    | 7.838708    |
| "Exp1"    | 2.9365473   | 2.3116367   | 3.8981214   | 2.9933326   | 2.9121082   | 2.8120816   | 2.9255567   | 2.9115896   |
| "Ext1"    | 8.398739    | 8.328038    | 8.243092    | 8.151859    | 8.230258    | 7.8468637   | 7.7175713   | 8.152112    |
| "Ext2"    | 6.1949444   | 6.5315776   | 6.6241975   | 6.5225725   | 6.527984    | 6.5382767   | 6.54687     | 6.5373583   |
| "Extl1"   | 3.6899445   | 5.6781206   | 3.609627    | 4.1028614   | 4.338281    | 5.573427    | 3.6747196   | 3.6484926   |
| "Extl2"   | 6.1934343   | 5.8645415   | 6.381895    | 6.60646115  | 6.0272955   | 5.57576985  | 6.07702525  | 6.12086     |
| "Extl3"   | 6.4924955   | 6.4707      | 6.887412    | 6.6777244   | 6.7658644   | 6.842758    | 6.877201    | 7.0218616   |
| "Eya3"    | 3.1898265   | 3.153094    | 3.4394085   | 3.07179     | 3.1760383   | 3.1864457   | 3.1259751   | 3.1611743   |
| "Ezh1"    | 5.0581309   | 5.09598515  | 5.0964976   | 5.2957401   | 5.15873445  | 5.1323209   | 5.08717865  | 5.10041615  |
| "Ezh2"    | 5.552236    | 5.503812    | 5.7604823   | 5.4660916   | 5.5280704   | 5.588099    | 5.6277723   | 5.5962467   |
| "Ezr"     | 6.6948721   | 5.48361815  | 6.207327    | 5.82791285  | 5.97178815  | 5.3830492   | 5.7382269   | 5.52144695  |
| "F10"     | 10.10932333 | 10.40191467 | 10.13103533 | 10.28637733 | 10.29471133 | 10.230197   | 9.777757333 | 10.22928167 |
| "F11"     | 9.659042    | 9.482188    | 10.778838   | 10.479942   | 8.653823    | 8.649376    | 9.587098    | 9.454706    |
| "F11r"    | 5.65073265  | 5.4457135   | 5.8547395   | 5.5230958   | 5.2039578   | 5.43489015  | 5.24329025  | 5.2112419   |
| "F12"     | 11.192061   | 11.5482025  | 11.261213   | 11.41214    | 11.716644   | 11.814638   | 11.2107     | 11.389154   |
| "F13a1"   | 5.364678    | 2.818549    | 6.308025    | 3.1779742   | 2.7338445   | 2.7282398   | 2.382218    | 2.3815348   |
| "F13b"    | 12.089927   | 12.20149    | 12.106934   | 12.583655   | 12.328538   | 12.283685   | 12.53253    | 12.536841   |
| "F2"      | 13.454587   | 13.4462595  | 13.399407   | 13.533605   | 13.776673   | 13.7756195  | 13.633294   | 13.656353   |
| "F2r"     | 9.7881445   | 10.277556   | 9.133339    | 10.1815505  | 9.307086    | 9.5998215   | 9.391343    | 10.444721   |
| "F2rl2"   | 2.7692451   | 2.7460272   | 2.6970265   | 2.7102466   | 2.758099    | 2.750348    | 2.7605      | 2.7800498   |
| "F3"      | 3.0202541   | 5.445       | 5.2686787   | 6.554773    | 5.823862    | 6.3034196   | 8.521025    | 7.1251874   |
| "F5"      | 11.78196825 | 11.6575255  | 11.5314085  | 11.9113015  | 12.00417    | 12.1635985  | 11.9520865  | 11.95693375 |
| "F7"      | 10.257156   | 10.409877   | 10.591825   | 11.140766   | 10.830502   | 10.385834   | 10.34432    | 10.683081   |
| "F8"      | 6.9192967   | 6.0512137   | 6.99345     | 6.8318906   | 6.806328    | 6.3615417   | 7.2154922   | 6.9330497   |
| "F8a"     | 3.6863205   | 3.6284513   | 3.6156359   | 3.6376426   | 3.7512023   | 3.662433    | 3.8162014   | 3.732493    |
| "F9"      | 11.662496   | 11.810478   | 11.308732   | 11.878733   | 11.837223   | 12.110847   | 11.286241   | 11.627754   |
| "Fa2h"    | 2.6592617   | 2.7524514   | 2.5548654   | 2.588676    | 2.6554086   | 2.6493466   | 2.6612787   | 2.6442935   |
| "Faah"    | 5.665115    | 6.853263    | 6.1587777   | 6.8816986   | 6.7690535   | 6.693464    | 6.517376    | 7.0429544   |
| "Fabp1"   | 13.49446    | 15.128708   | 14.8354495  | 15.1008085  | 15.198385   | 15.220102   | 15.6267873  | 15.62952575 |
| "Fabp2"   | 7.218095    | 9.0415535   | 8.914864    | 8.198928    | 8.910124    | 8.883854    | 9.148325    | 8.47872     |
| "Fabp3"   | 2.4550056   | 2.4144762   | 2.4311411   | 2.3951106   | 2.4467835   | 2.430041    | 2.498797    | 2.4225767   |
| "Fabp4"   | 6.886774867 | 6.853183    | 6.150588667 | 6.153281367 | 6.580589433 | 7.477026533 | 6.2246369   | 5.887639333 |
| "Fabp5"   | 9.86224375  | 9.6218675   | 10.5728035  | 9.349639    | 8.51054335  | 7.483503    | 9.653992    | 10.29416    |
| "Fabp6"   | 2.7336369   | 2.6763723   | 2.5723326   | 2.6359715   | 2.7363632   | 2.7300603   | 2.6938899   | 2.7518668   |
| "Fabp7"   | 9.03546     | 8.899709    | 8.743035    | 8.170615    | 9.359474    | 9.438753    | 8.388735    | 7.5621877   |
| "Fabp9"   | 2.89537585  | 2.87326365  | 2.7618688   | 2.8228482   | 2.92360115  | 2.9212159   | 2.8613465   | 2.9245565   |

|            |             |             |             |             |             |             |             |             |
|------------|-------------|-------------|-------------|-------------|-------------|-------------|-------------|-------------|
| "Fadd"     | 3.1570885   | 3.8123376   | 3.4783764   | 3.574365    | 3.5303023   | 3.5048213   | 3.5434513   | 3.5258906   |
| "Fads1"    | 10.290169   | 10.82625    | 11.115323   | 11.04295    | 9.457951    | 9.3917885   | 10.8934765  | 11.01494    |
| "Fads2"    | 6.88316345  | 8.60342515  | 8.35422035  | 8.6142446   | 7.407159    | 8.10749935  | 8.47599525  | 8.81148665  |
| "Faf1"     | 5.9575458   | 6.192553    | 5.65610335  | 6.1084012   | 6.0214456   | 6.81581715  | 5.9229235   | 6.07645725  |
| "Fah"      | 12.259593   | 12.599317   | 12.641948   | 12.77132    | 12.692908   | 12.632873   | 12.732042   | 12.918068   |
| "Fahd1"    | 7.168555    | 7.9726315   | 7.607055    | 7.7392855   | 8.069805    | 8.357525    | 8.3793125   | 8.536963    |
| "Faim"     | 7.0275764   | 7.6953397   | 7.209091    | 7.256068    | 6.9281683   | 7.2026305   | 7.2635317   | 6.8010607   |
| "Fam100a"  | 4.669641    | 4.766507    | 4.4316125   | 4.342252    | 4.3448935   | 4.3880286   | 4.2788105   | 4.467392    |
| "Fam100b"  | 9.646523    | 9.172959    | 9.457642    | 9.5141115   | 9.078261    | 8.960023    | 9.261241    | 9.050885    |
| "Fam101b"  | 2.9366279   | 2.9202564   | 3.6000092   | 2.8941076   | 2.7680826   | 3.339004    | 2.9437146   | 2.9243875   |
| "Fam102a"  | 5.13255435  | 5.93594265  | 5.4799643   | 5.934532    | 6.1398825   | 5.3125985   | 5.55690275  | 5.877264    |
| "Fam103a1" | 9.179127    | 9.18029     | 9.135398    | 9.085265    | 9.271846    | 9.092435    | 9.166028    | 9.125815    |
| "Fam105a"  | 4.4722905   | 4.0956635   | 6.4745708   | 5.332202    | 5.118931    | 4.7893558   | 5.085794    | 4.435133    |
| "Fam105b"  | 8.370166    | 8.65677     | 7.813492    | 8.299151    | 8.146661    | 8.225833    | 7.8484426   | 8.460176    |
| "Fam107b"  | 7.3147272   | 7.245026833 | 7.243895233 | 7.5036881   | 7.890863    | 7.130603333 | 7.939641333 | 7.981378867 |
| "Fam108a"  | 8.9960575   | 9.615453    | 9.286346    | 9.616376    | 9.321357    | 9.329887    | 9.352575    | 9.37285     |
| "Fam108c"  | 10.763977   | 8.503709    | 9.003114    | 8.926552    | 8.624647    | 9.197809    | 9.169121    | 8.957526    |
| "Fam109b"  | 2.8049695   | 2.8096673   | 2.672109    | 2.7348886   | 2.840141    | 2.859643    | 2.7869298   | 2.94246     |
| "Fam110c"  | 2.79174185  | 2.3813925   | 2.3332471   | 2.35007575  | 2.4023014   | 2.39283645  | 2.4045898   | 2.3832525   |
| "Fam111a"  | 3.6013608   | 4.968016    | 6.848863    | 5.3080187   | 5.127629    | 5.2161217   | 5.673976    | 5.2705574   |
| "Fam114a1" | 5.72250925  | 6.0346545   | 6.8732574   | 6.37803875  | 6.0074247   | 5.9086887   | 6.75486915  | 6.3169218   |
| "Fam114a2" | 8.031096    | 8.1470395   | 8.1827318   | 8.409471    | 8.2999075   | 8.2791187   | 8.3959005   | 8.4569265   |
| "Fam115c"  | 2.745189    | 2.7655878   | 2.6336968   | 2.704299    | 2.7423863   | 2.7386434   | 2.7154133   | 2.736447    |
| "Fam116a"  | 4.69600755  | 4.74473415  | 4.7168631   | 4.7415916   | 4.79087005  | 4.7169701   | 5.2044261   | 4.89387025  |
| "Fam117a"  | 6.463296    | 5.5210505   | 6.7614675   | 6.2509136   | 6.0888977   | 5.847645    | 6.157759    | 5.847386    |
| "Fam117b"  | 7.4157896   | 6.8486276   | 6.4597716   | 6.165781    | 6.6691694   | 6.471021    | 6.2839727   | 6.224142    |
| "Fam118a"  | 5.533771    | 5.873394    | 5.508105    | 5.516394    | 5.0863914   | 5.2298293   | 5.346087    | 4.786408    |
| "Fam118b"  | 4.3854973   | 4.3952358   | 4.14727285  | 4.3022065   | 4.2707822   | 4.355113    | 4.35285115  | 4.6831535   |
| "Fam120a"  | 7.55474685  | 7.235467525 | 7.2656569   | 7.3288382   | 7.188637075 | 7.1485004   | 7.2385717   | 7.370097    |
| "Fam120b"  | 5.7126689   | 5.83182645  | 5.5535563   | 5.9197375   | 5.66457625  | 5.79054315  | 5.6939772   | 5.87334565  |
| "Fam122a"  | 4.258844867 | 4.1688764   | 3.651826733 | 3.685963033 | 3.791124033 | 4.228114333 | 3.903177667 | 3.826790367 |
| "Fam125a"  | 6.991287433 | 7.4771479   | 7.448473833 | 7.424277667 | 7.388314633 | 7.355829233 | 7.321494067 | 7.447177467 |
| "Fam125b"  | 2.9880026   | 2.8639594   | 3.186890933 | 2.8391837   | 2.856946533 | 2.7266828   | 2.6716034   | 2.7321326   |
| "Fam126a"  | 6.4009213   | 6.2471113   | 7.3626566   | 7.0661774   | 7.3260508   | 5.8520494   | 7.113937    | 6.546026    |
| "Fam126b"  | 6.5280313   | 9.635869    | 8.285249    | 8.840047    | 9.692436    | 9.202291    | 9.088662    | 9.450303    |
| "Fam129a"  | 5.194146    | 3.269864    | 5.5673423   | 4.729171    | 2.8736806   | 3.4958558   | 3.688771    | 3.359601    |
| "Fam129b"  | 4.083817    | 4.6872983   | 6.016985    | 5.625655    | 4.7731185   | 2.8864615   | 4.970343    | 4.402785    |
| "Fam131b"  | 3.0415978   | 3.0479748   | 2.8730395   | 2.9450397   | 3.1016717   | 3.0716863   | 2.9951158   | 3.1071324   |
| "Fam132a"  | 3.009964825 | 2.8087791   | 2.82525695  | 2.78859645  | 2.770159825 | 2.977543975 | 2.907657975 | 2.96232235  |
| "Fam133b"  | 4.3451156   | 4.4857847   | 4.4114092   | 4.18448575  | 4.34124525  | 4.45475125  | 4.23780075  | 4.2848371   |
| "Fam134a"  | 7.588524    | 7.898328    | 7.514912    | 8.194841    | 7.5797496   | 8.188835    | 8.032803    | 8.192622    |
| "Fam134b"  | 13.395218   | 12.68444    | 11.24907125 | 11.135067   | 10.8063075  | 12.375994   | 10.496722   | 10.3260475  |
| "Fam134c"  | 5.7265892   | 5.54884475  | 5.6517488   | 5.81760545  | 5.5702032   | 5.54324865  | 5.6134988   | 5.62808715  |
| "Fam136a"  | 9.991223    | 10.463588   | 10.125022   | 10.118946   | 9.831874    | 10.210356   | 10.002218   | 10.117872   |
| "Fam13b"   | 8.6968155   | 8.41008     | 8.699041    | 8.023541    | 8.328158    | 9.066098    | 8.632139    | 7.8461533   |
| "Fam13c"   | 2.9458219   | 2.97609935  | 2.8191147   | 2.87038935  | 3.02867795  | 3.11133015  | 2.91399025  | 3.07928385  |
| "Fam149b"  | 4.8709793   | 5.2427797   | 5.467201    | 5.802996    | 5.029093    | 4.2577734   | 5.747629    | 5.551411    |
| "Fam158a"  | 5.2543864   | 6.2044387   | 6.9465256   | 7.1322465   | 5.864161    | 5.8497066   | 6.8809786   | 6.890438    |
| "Fam160a2" | 4.61954955  | 4.5630642   | 4.3924981   | 4.41924585  | 4.36469585  | 4.5168848   | 4.40298625  | 4.4926062   |
| "Fam160b1" | 5.40158285  | 5.6209941   | 5.1141399   | 5.679845    | 5.7163141   | 5.72981965  | 5.81017875  | 5.8294628   |
| "Fam161a"  | 2.839195    | 2.8876235   | 2.9466686   | 2.7917116   | 2.831353    | 2.8144796   | 2.842131    | 2.8241034   |
| "Fam162a"  | 9.618932    | 10.185722   | 10.636991   | 10.068903   | 9.890741    | 10.018307   | 10.005066   | 10.065771   |
| "Fam165b"  | 7.085483    | 7.026105    | 7.402858    | 7.1494956   | 7.040517    | 7.19781     | 7.4716206   | 7.2880316   |
| "Fam166a"  | 2.3964133   | 2.3637962   | 2.3330414   | 2.340974    | 2.3819804   | 2.369055    | 2.3821485   | 2.3735826   |
| "Fam167b"  | 6.6876006   | 6.4501114   | 6.7869906   | 6.2906685   | 5.972433    | 6.0761933   | 6.9294157   | 6.012726    |
| "Fam173a"  | 8.759022    | 8.785422    | 9.211765    | 9.154242    | 8.726743    | 8.68537     | 8.967036    | 9.075347    |
| "Fam174a"  | 6.409716    | 6.38739535  | 6.18270065  | 6.40076215  | 6.3074302   | 6.34629015  | 6.3839853   | 6.1920587   |
| "Fam174b"  | 4.451725    | 4.0591106   | 4.013912    | 4.0216417   | 4.0786376   | 3.899719    | 4.075511    | 4.063714    |
| "Fam176a"  | 10.056945   | 10.462301   | 9.9147835   | 10.747734   | 10.386221   | 11.354477   | 10.837612   | 11.181931   |
| "Fam178a"  | 7.239124    | 6.766524    | 7.6407924   | 7.1133494   | 7.4688206   | 7.6394606   | 7.5197287   | 7.3847656   |
| "Fam181b"  | 2.5140867   | 2.5126662   | 2.40131     | 2.4380016   | 2.5112276   | 2.6067057   | 2.4985447   | 2.4908412   |
| "Fam188a"  | 8.278       | 8.630668    | 8.751608    | 9.067187    | 8.62601     | 8.82882     | 8.790842    | 9.451721    |
| "Fam189b"  | 2.691216    | 2.4298954   | 3.4782202   | 2.6439223   | 2.4564035   | 2.624363    | 2.8108106   | 2.676044    |
| "Fam18a"   | 2.6448014   | 2.5978713   | 2.5420265   | 2.558265    | 2.622739    | 2.651471    | 2.619716    | 2.6615481   |
| "Fam192a"  | 7.3195133   | 7.5921035   | 7.794149    | 7.7810035   | 7.850298    | 7.8685756   | 7.364938    | 7.5674577   |
| "Fam193b"  | 6.7328606   | 6.959154    | 6.7254233   | 6.8444543   | 7.2967367   | 7.203646    | 7.094914    | 7.392961    |
| "Fam195a"  | 8.474272    | 9.532175    | 8.32236     | 8.379629    | 9.21698     | 9.197922    | 8.494034    | 8.596645    |
| "Fam195b"  | 4.8591166   | 6.1422973   | 5.662797    | 5.344035    | 5.341878    | 5.6578903   | 6.02928     | 5.5748653   |
| "Fam198b"  | 2.368735    | 2.3279574   | 2.2749853   | 2.4865904   | 2.3583567   | 2.3515134   | 2.356163    | 2.3967538   |
| "Fam19a5"  | 2.5724814   | 3.7533696   | 2.437029    | 2.5463407   | 2.6178129   | 2.595072    | 2.6016867   | 2.6578863   |
| "Fam203a"  | 4.1835      | 4.8816423   | 3.1601496   | 3.6913655   | 4.134386    | 4.1219625   | 4.0679946   | 4.4782386   |
| "Fam20b"   | 4.8354454   | 5.11061705  | 4.82279835  | 4.96218095  | 4.9799424   | 4.85328575  | 4.8228417   | 4.87349715  |
| "Fam20c"   | 7.4888654   | 7.5287457   | 7.4891977   | 8.03199     | 7.518387    | 7.8378882   | 7.348796    | 8.34207     |
| "Fam26e"   | 2.4528809   | 2.4274986   | 2.378109    | 2.3855057   | 2.4485393   | 2.4442332   | 2.4422464   | 2.4378605   |
| "Fam32a"   | 7.3710425   | 7.1636398   | 7.62294385  | 7.08366675  | 7.153349    | 7.53867435  | 7.4165027   | 7.39206555  |
| "Fam33a"   | 2.6616452   | 2.7521587   | 2.83464125  | 2.74264075  | 2.7583866   | 2.78279005  | 3.0466758   | 2.82301995  |
| "Fam36a"   | 9.004423    | 9.4621525   | 10.068874   | 9.901127    | 9.766663    | 9.664957    | 10.435152   | 9.984817    |
| "Fam3b"    | 2.4526677   | 2.425623    | 2.35        | 2.381255    | 2.4500778   | 2.446454    | 2.4405096   | 2.4385655   |
| "Fam3c"    | 8.477862    | 8.527071    | 8.9010575   | 9.073611    | 8.4842345   | 8.409432    | 8.8109465   | 9.0116305   |
| "Fam43a"   | 5.5768847   | 4.8763323   | 6.5696416   | 5.9916215   | 5.601233    | 5.5975657   | 6.90844     | 5.608914    |
| "Fam45a"   | 8.139025    | 8.243452    | 8.45266     | 8.157629    | 8.288643    | 7.942026    | 8.395826    | 8.232948    |

|           |             |             |             |             |             |             |             |             |
|-----------|-------------|-------------|-------------|-------------|-------------|-------------|-------------|-------------|
| "Fam46c"  | 8.049229    | 8.27265     | 7.419846    | 8.193815    | 8.235755    | 7.600249    | 8.088837    | 6.712994    |
| "Fam48a"  | 4.112596267 | 3.937905967 | 4.066161067 | 3.984403767 | 3.954271667 | 4.070134333 | 4.103704667 | 3.8736725   |
| "Fam49b"  | 9.007851    | 7.287088    | 8.573738    | 7.918141    | 7.2377043   | 7.523734    | 8.062358    | 7.612898    |
| "Fam50a"  | 8.207161    | 7.846469    | 8.128076    | 7.849399    | 7.897672    | 8.530716    | 8.023931    | 8.11225     |
| "Fam53a"  | 6.760928    | 7.2789083   | 6.426684    | 6.9962      | 7.3091407   | 7.1254773   | 7.0343275   | 6.393486    |
| "Fam53c"  | 4.549053    | 4.480303    | 5.001507    | 4.6193113   | 5.139776    | 4.5310864   | 4.841896    | 4.9310493   |
| "Fam54b"  | 7.1301481   | 7.923246    | 7.312631    | 7.965727    | 7.7350629   | 7.60227     | 7.500337667 | 7.700331467 |
| "Fam58b"  | 6.3082128   | 6.5196567   | 6.5231237   | 5.8336964   | 6.085614    | 6.3919187   | 6.7108097   | 6.1497355   |
| "Fam60a"  | 3.0242393   | 2.7274792   | 2.8215923   | 3.081125    | 2.8952255   | 2.9550395   | 3.1685162   | 3.2680326   |
| "Fam63a"  | 8.45383615  | 9.6532265   | 9.009363    | 9.258461625 | 9.473708025 | 9.2634629   | 9.3295125   | 9.2725149   |
| "Fam64a"  | 2.9610972   | 2.932725    | 2.7805412   | 2.9252203   | 2.9744694   | 2.9808621   | 2.9007082   | 3.028748    |
| "Fam65a"  | 4.5220447   | 4.5760956   | 4.4015107   | 4.4812775   | 4.529247    | 4.5100417   | 4.9883633   | 4.446987    |
| "Fam65b"  | 3.7297213   | 4.316848    | 5.4764156   | 4.850363    | 2.9423914   | 3.9614027   | 4.0537653   | 3.7294266   |
| "Fam69b"  | 2.1871338   | 2.164093    | 2.096158    | 2.1548586   | 2.187831    | 2.1949422   | 2.1943088   | 2.4501095   |
| "Fam73b"  | 4.805163    | 5.67538825  | 4.95434785  | 5.242664125 | 5.59946615  | 5.6179701   | 5.1613807   | 5.2439779   |
| "Fam76a"  | 5.69959625  | 5.4341623   | 5.202261    | 5.573537    | 5.4516526   | 5.5345695   | 5.28799575  | 5.5569552   |
| "Fam76b"  | 7.882285667 | 7.368122233 | 7.026527    | 7.194544333 | 7.461533233 | 7.665296    | 7.210281167 | 7.4675889   |
| "Fam81a"  | 2.4438367   | 2.6797225   | 2.9501193   | 3.268779    | 2.9755156   | 2.4210842   | 3.0295687   | 3.1327446   |
| "Fam82a2" | 9.3008035   | 9.4535665   | 9.5330665   | 9.5810705   | 9.3296725   | 8.9092823   | 9.6340375   | 9.23828225  |
| "Fam82b"  | 5.1285054   | 5.797470867 | 5.787263433 | 5.881898433 | 5.9452781   | 5.9230838   | 6.2833441   | 6.028290133 |
| "Fam83f"  | 2.2531967   | 2.2247264   | 2.9205167   | 2.2078862   | 2.252101    | 2.2540512   | 2.260008    | 2.2463593   |
| "Fam83g"  | 2.615174    | 2.5789382   | 2.5701363   | 2.5684154   | 2.598344    | 2.5918121   | 2.5755992   | 2.586311    |
| "Fam83h"  | 3.9887755   | 4.0551715   | 4.03773     | 4.042989    | 4.04785     | 4.0823083   | 4.0783563   | 4.050899    |
| "Fam84a"  | 2.6659076   | 2.7219267   | 3.2149205   | 2.7254324   | 2.7412214   | 2.784968    | 3.1329372   | 2.8308558   |
| "Fam89a"  | 2.530079    | 2.9245496   | 4.0896354   | 4.190041    | 2.793571    | 2.7461104   | 5.0125847   | 2.5558982   |
| "Fam89b"  | 5.3414507   | 5.2433596   | 5.1415205   | 5.6567583   | 5.3878036   | 5.1667147   | 5.3594675   | 5.09937     |
| "Fam92a"  | 8.759182    | 9.012034    | 9.049156    | 9.091379    | 8.977325    | 8.327096    | 9.396814    | 9.033923    |
| "Fam96a"  | 10.5187645  | 10.3419205  | 10.5428935  | 10.1424665  | 10.3241955  | 10.3887195  | 10.7335725  | 10.189754   |
| "Fam96b"  | 7.522539    | 7.092577    | 7.516613    | 7.5125628   | 6.8412914   | 7.2371078   | 7.541232    | 7.6400876   |
| "Fam98a"  | 8.237471    | 8.559071    | 8.955665    | 8.511436    | 8.623253    | 8.459578    | 8.505924    | 8.701645    |
| "Fam98c"  | 4.8073335   | 4.9803505   | 4.867552    | 4.679006    | 4.236659    | 5.247302    | 4.637063    | 4.663885    |
| "Fanca"   | 3.743406    | 5.4589844   | 4.608933    | 4.6290555   | 4.666879    | 4.9510307   | 4.670248    | 4.4938564   |
| "Fanc"    | 4.172804    | 3.448151    | 3.4456499   | 3.5004219   | 3.3958323   | 3.43574655  | 3.3851018   | 3.34795225  |
| "Fancf"   | 5.452211    | 5.8750052   | 5.363468    | 5.725776    | 5.3094573   | 5.7256074   | 6.3540716   | 5.829846    |
| "Fangc"   | 2.3647914   | 2.3327231   | 2.305404    | 2.3134391   | 2.351831    | 2.3528256   | 2.3539464   | 2.33808     |
| "Fanci"   | 2.4599588   | 2.428032    | 2.3923879   | 2.3987048   | 2.461966    | 2.4496694   | 2.4442654   | 2.4569345   |
| "Fancf"   | 5.545606    | 6.792507    | 6.6125093   | 6.548713    | 6.3403683   | 6.4492097   | 6.3438215   | 6.715871    |
| "Fancm"   | 2.815274    | 2.7794123   | 2.7374692   | 2.6760793   | 2.7945647   | 2.7892141   | 2.8004012   | 2.7832785   |
| "Fank1"   | 2.535932    | 2.5055184   | 2.4600592   | 2.4999633   | 2.5337658   | 2.5326884   | 2.5182543   | 2.5225406   |
| "Fap"     | 2.5963674   | 2.5641828   | 2.5220933   | 2.5458465   | 2.5809226   | 2.5759673   | 2.5845232   | 2.5756392   |
| "Far1"    | 3.70527706  | 3.25708324  | 4.45495026  | 3.79591334  | 3.44855252  | 3.81710662  | 4.21544212  | 3.53748858  |
| "Farp1"   | 5.181712    | 6.5978384   | 6.0504603   | 5.9827604   | 6.0262165   | 5.422743    | 5.7090974   | 6.070094    |
| "Farp2"   | 3.59787     | 3.5662088   | 3.0048447   | 2.8510685   | 3.1801279   | 3.0145473   | 3.0199397   | 3.0254016   |
| "Fars2"   | 6.6938138   | 6.9048603   | 6.472235    | 6.9429902   | 7.1103853   | 6.79211715  | 7.36256185  | 7.41223015  |
| "Farsa"   | 5.214335    | 5.453881    | 5.4545383   | 5.065987    | 5.704908    | 5.470968    | 5.3434253   | 5.210003    |
| "Farsb"   | 6.788704175 | 6.8380205   | 6.93571345  | 6.636113475 | 7.054516675 | 6.89885515  | 7.110557825 | 6.971066975 |
| "Fas"     | 8.508186    | 8.3205595   | 8.86691     | 9.095173    | 8.23517     | 8.241785    | 8.470311    | 8.247899    |
| "Fasl"    | 2.3891077   | 2.3585086   | 2.2973118   | 2.3479      | 2.380558    | 2.3715613   | 2.3813589   | 2.3652823   |
| "Fasn"    | 8.309328    | 9.185632    | 10.132595   | 10.169342   | 10.723079   | 7.9305763   | 10.194211   | 10.768957   |
| "Fastk"   | 5.2899957   | 6.094787    | 4.9148393   | 5.590206    | 6.0185003   | 5.7583084   | 5.2364745   | 5.970209    |
| "Fastkd1" | 8.39396     | 8.936835    | 8.123966    | 8.559337    | 8.874553    | 9.353763    | 8.343838    | 8.945824    |
| "Fastkd2" | 8.018108967 | 7.734799233 | 8.043506333 | 7.8584252   | 8.209874667 | 8.317665867 | 8.362179    | 8.2824931   |
| "Fastkd5" | 7.188451    | 7.3611994   | 7.3956366   | 7.742675    | 8.034765    | 7.5484333   | 7.988201    | 8.00586     |
| "Fau"     | 12.627064   | 12.822585   | 12.50301    | 12.281211   | 12.454166   | 12.511933   | 12.231291   | 12.366526   |
| "Fbl"     | 8.102109    | 8.2957985   | 8.354128    | 8.12555435  | 8.168904    | 8.2520055   | 7.985117    | 8.4662      |
| "Fblim1"  | 3.19208785  | 2.83083835  | 3.4672909   | 3.074566    | 2.68977125  | 2.932508    | 3.04818915  | 3.0397309   |
| "Fbln5"   | 6.3067784   | 6.259732    | 6.268987    | 6.282129    | 6.948507    | 7.332142    | 6.0204535   | 5.744267    |
| "Fbn1"    | 4.0368526   | 3.4284935   | 4.00481355  | 4.1997239   | 4.07791495  | 3.53768445  | 4.0670319   | 3.69989285  |
| "Fbn2"    | 2.388769    | 2.3609219   | 2.3015788   | 2.3241181   | 2.3845646   | 2.3788543   | 2.384119    | 2.3724442   |
| "Fbp1"    | 14.331453   | 14.498909   | 14.0467     | 14.623481   | 14.80791    | 14.573335   | 14.552037   | 14.540079   |
| "Fbp2"    | 3.7451155   | 3.8491988   | 3.6525552   | 3.6819115   | 3.7389963   | 3.8969004   | 3.7423995   | 3.7229335   |
| "Fbrs"    | 4.1450803   | 4.22508165  | 4.20793575  | 4.08452735  | 4.2783301   | 4.46389425  | 4.14432645  | 4.1965196   |
| "Fbxl12"  | 6.1511974   | 5.6600275   | 4.9726853   | 5.301067    | 5.1645145   | 5.613127    | 5.255688    | 5.207858    |
| "Fbxl14"  | 6.7408977   | 5.970853    | 6.4118776   | 6.140688    | 6.2257795   | 6.3066807   | 6.173127    | 6.334195    |
| "Fbxl15"  | 3.962426    | 4.5490203   | 3.9323785   | 4.3217993   | 3.6306863   | 3.9469726   | 3.9203496   | 3.736759    |
| "Fbxl20"  | 7.168822    | 7.663393    | 6.182063    | 7.562049    | 7.495729    | 7.510821    | 7.0816727   | 7.758578    |
| "Fbxl3"   | 7.31260525  | 6.8231835   | 6.6922932   | 6.73195     | 6.29846465  | 6.93837375  | 6.894289    | 7.01111765  |
| "Fbxl6"   | 5.067797    | 5.198207    | 5.166692    | 5.1059127   | 5.1032205   | 5.297603    | 5.1046195   | 5.092627    |
| "Fbxl8"   | 3.034157    | 3.3691175   | 3.339797    | 3.5168004   | 3.26616     | 3.3575335   | 3.309636    | 4.0959253   |
| "Fbxo11"  | 7.9277816   | 7.6255302   | 7.714774    | 7.19802     | 7.2831903   | 7.3852887   | 8.137972    | 7.4421654   |
| "Fbxo15"  | 2.7361534   | 2.7353866   | 2.696102    | 2.6890538   | 2.7548082   | 2.7457438   | 2.7117105   | 2.749158    |
| "Fbxo17"  | 2.6329484   | 2.6032476   | 2.5900974   | 2.5926201   | 2.6153898   | 2.6194117   | 2.6087132   | 2.7343898   |
| "Fbxo18"  | 7.234779    | 7.100313    | 7.5546145   | 7.108426    | 7.106146    | 7.438691    | 7.313382    | 7.1922565   |
| "Fbxo21"  | 5.19994435  | 6.0521473   | 5.6459637   | 6.77905605  | 5.7210195   | 5.7366984   | 6.09221815  | 7.0390005   |
| "Fbxo22"  | 8.33750135  | 8.8014025   | 8.3072685   | 8.5553115   | 8.6922037   | 8.8695175   | 9.1389762   | 9.00098665  |
| "Fbxo25"  | 5.911622    | 5.968528    | 6.698846    | 6.342585    | 6.262971    | 6.0332823   | 6.740032    | 6.048948    |
| "Fbxo28"  | 5.3279552   | 5.594767    | 5.3002186   | 5.9078054   | 6.033796    | 6.1895914   | 5.680258    | 6.026162    |
| "Fbxo3"   | 6.860412975 | 7.181980825 | 7.102168375 | 7.3099186   | 7.35504555  | 7.014412775 | 7.54313555  | 7.517840525 |
| "Fbxo31"  | 7.6094255   | 7.573633    | 6.023127    | 5.878417    | 5.571699    | 7.224923    | 5.43538     | 5.4607353   |
| "Fbxo32"  | 5.60270085  | 4.0067413   | 3.5855186   | 3.73272515  | 3.65563315  | 3.96448895  | 3.6697155   | 3.4220538   |
| "Fbxo33"  | 8.68091075  | 7.5178251   | 8.363223    | 8.263986    | 8.5502735   | 7.9813403   | 8.2694095   | 8.3548875   |

|            |             |             |             |             |             |             |             |             |
|------------|-------------|-------------|-------------|-------------|-------------|-------------|-------------|-------------|
| "Fbxo36"   | 5.2897344   | 6.7636147   | 5.6152      | 6.0193176   | 5.9869914   | 5.828953    | 5.7153864   | 5.7368846   |
| "Fbxo38"   | 7.2183285   | 7.2056746   | 7.125007    | 7.2460976   | 7.228323    | 7.391814    | 7.226283    | 7.079858    |
| "Fbxo4"    | 5.1589393   | 5.04936     | 5.0582566   | 4.94521325  | 4.6700525   | 5.1065205   | 5.06043885  | 5.1359869   |
| "Fbxo42"   | 3.660127    | 2.998899    | 2.8638227   | 2.3499274   | 2.6772575   | 2.6687799   | 2.640099    | 2.3280163   |
| "Fbxo43"   | 2.3706195   | 2.3467197   | 2.272968    | 2.3238716   | 2.3855915   | 2.3670907   | 2.355276    | 2.3536663   |
| "Fbxo45"   | 4.949675    | 4.58930895  | 4.66024775  | 4.57367755  | 4.7630944   | 4.77757765  | 4.69190335  | 4.65041815  |
| "Fbxo6"    | 7.4129267   | 7.5688066   | 8.02333     | 7.310707    | 6.9700665   | 7.243024    | 7.4349475   | 7.2297277   |
| "Fbxo8"    | 9.014528    | 9.215855    | 8.830895    | 9.308837    | 9.315232    | 9.37373     | 9.321872    | 9.299138    |
| "Fbxo9"    | 8.923112    | 8.87594015  | 8.80472065  | 8.9529705   | 8.9478255   | 8.8542375   | 8.82054885  | 8.93736265  |
| "Fbxw11"   | 10.283102   | 10.1652155  | 10.157903   | 10.326967   | 10.08978075 | 10.2705955  | 10.1431975  | 10.1495135  |
| "Fbxw2"    | 5.40992778  | 5.33114008  | 4.97623912  | 5.05213444  | 5.3114346   | 5.22852948  | 5.052276    | 5.07753366  |
| "Fbxw4"    | 5.752226    | 5.434402    | 5.371971    | 5.033187    | 5.4544835   | 5.8124866   | 5.23676     | 5.582818    |
| "Fbxw5"    | 4.888618    | 5.356697    | 4.8217673   | 4.843337    | 4.8892775   | 4.864104    | 4.9419045   | 4.8532724   |
| "Fbxw7"    | 6.42701525  | 6.2582105   | 6.1716601   | 6.4486082   | 6.42748935  | 6.39962535  | 6.4234011   | 6.42901465  |
| "Fbxw8"    | 3.7855773   | 4.3549523   | 4.1803527   | 4.296385    | 4.3106265   | 4.012071    | 4.0095325   | 4.2624354   |
| "Fbxw9"    | 4.65915015  | 4.8703236   | 5.0557341   | 4.66133275  | 5.16609015  | 5.0239476   | 4.870259    | 4.9139995   |
| "Fcer1g"   | 10.227057   | 8.11279     | 10.3992     | 9.502446    | 8.8175955   | 8.705561    | 9.200616    | 8.791971    |
| "Fcer2a"   | 2.4815126   | 2.53294895  | 2.6155502   | 2.80797615  | 2.56235335  | 2.473765    | 2.55576545  | 2.7125192   |
| "Fcgr1"    | 7.580873    | 5.1515303   | 8.303292    | 7.243375    | 5.822344    | 5.4113684   | 6.8550763   | 6.090175    |
| "Fcgr2b"   | 9.48678325  | 8.38451775  | 9.50841625  | 9.692183    | 9.39444475  | 9.09190925  | 9.645517625 | 9.502732875 |
| "Fcgr3"    | 10.452196   | 9.038457    | 10.258053   | 9.262259    | 9.252216    | 9.572572    | 8.660831    | 8.359213    |
| "Fcgr4"    | 9.084577    | 7.5590315   | 8.707666    | 7.5183387   | 7.580451    | 8.344038    | 7.271367    | 6.7874618   |
| "Fcgrt"    | 9.145548    | 9.136955    | 8.79998     | 9.152067    | 9.349077    | 9.269093    | 9.148592    | 9.176752    |
| "Fcho1"    | 2.67402125  | 2.64639955  | 2.5527089   | 2.59923005  | 2.6831995   | 2.66523275  | 2.6432948   | 2.68107235  |
| "Fcna"     | 10.820539   | 9.73733     | 10.478939   | 10.100869   | 10.377069   | 9.740661    | 10.28519    | 9.667204    |
| "Fcrl1"    | 2.58251575  | 2.5461787   | 2.7310293   | 2.52550245  | 2.574686    | 2.56819845  | 2.57030675  | 2.55884405  |
| "Fcrla"    | 2.5226984   | 2.5033879   | 2.5328486   | 2.47706375  | 2.5256236   | 2.5409961   | 2.50565805  | 2.51656545  |
| "Fdft1"    | 11.887749   | 10.9949485  | 12.624782   | 11.54153025 | 9.13325075  | 7.4456403   | 10.1662585  | 11.177521   |
| "Fdps"     | 6.865023    | 7.08001     | 6.9898929   | 6.52778475  | 5.21064125  | 5.0733743   | 5.763552    | 6.52122965  |
| "Fdx1"     | 11.713051   | 11.906206   | 11.737682   | 12.144131   | 11.488431   | 11.244255   | 11.684794   | 12.295573   |
| "Fdx1l"    | 7.5780263   | 7.9473424   | 7.621641    | 7.722484    | 7.6880116   | 7.9503365   | 7.4716873   | 7.5384927   |
| "Fdxr"     | 5.996244    | 5.9096      | 6.305414    | 6.4780765   | 5.9852576   | 5.945263    | 5.8648596   | 6.008655    |
| "Fech"     | 10.32268233 | 9.893648    | 10.14819233 | 10.20785    | 10.02709467 | 9.805197    | 10.36487533 | 10.49128567 |
| "Fem1a"    | 3.698907    | 4.3847146   | 3.6147523   | 3.6402903   | 3.802672    | 3.5507288   | 4.0037246   | 3.335935    |
| "Fem1b"    | 6.4874532   | 5.03466345  | 5.1512147   | 4.9683482   | 5.16069435  | 5.17863945  | 5.1846685   | 5.12411675  |
| "Fen1"     | 5.43504285  | 4.9860818   | 5.44742715  | 5.3138745   | 5.50582375  | 5.332242    | 5.07888325  | 5.5518242   |
| "Ferd3l"   | 2.4107933   | 2.3899877   | 2.327721    | 2.362641    | 2.4073935   | 2.4032102   | 2.4098742   | 2.3967156   |
| "Fermt2"   | 9.056417    | 8.73474025  | 9.539519    | 9.46985875  | 8.673004    | 9.029005    | 9.675485    | 9.6778985   |
| "Fermt3"   | 6.85139     | 5.456349733 | 6.9784011   | 6.334386833 | 6.117980033 | 5.9671461   | 6.049117233 | 5.660321233 |
| "Fert2"    | 3.7149384   | 3.7463603   | 3.96037365  | 3.8636056   | 3.65735085  | 3.4058722   | 3.8725009   | 3.78043185  |
| "Fes"      | 5.76802385  | 4.25233805  | 5.4468392   | 5.06872685  | 4.549518    | 4.4092563   | 4.2849122   | 4.7559566   |
| "Fetub"    | 12.13095    | 11.543416   | 12.045373   | 11.544515   | 11.5596485  | 11.929431   | 11.1311     | 11.736427   |
| "Fez2"     | 8.3203125   | 8.395164    | 8.341117    | 8.797186    | 7.851547    | 8.161397    | 8.342038    | 8.534843    |
| "Fezf2"    | 2.635804    | 2.607492    | 2.541164    | 2.5457435   | 2.6305556   | 2.62146     | 2.6055984   | 2.6269956   |
| "Ffar2"    | 2.019037    | 1.9919918   | 1.9880159   | 1.9603238   | 2.056609    | 2.4090214   | 2.002026    | 1.9956104   |
| "Fga"      | 14.60068    | 13.734163   | 14.026281   | 13.645252   | 13.965562   | 13.885961   | 13.741012   | 13.877676   |
| "Fgb"      | 15.473925   | 15.121565   | 15.3027525  | 14.937939   | 15.089479   | 15.054378   | 14.937751   | 15.091082   |
| "Fgd1"     | 2.75087405  | 2.7322112   | 2.64880835  | 2.67649875  | 2.77234315  | 2.7386303   | 2.73468185  | 2.744038    |
| "Fgd2"     | 2.6141107   | 2.443091    | 4.3506684   | 3.2851186   | 2.6136103   | 2.5206287   | 3.189243    | 2.6232812   |
| "Fgd4"     | 3.39702775  | 3.45241935  | 3.3918584   | 3.601733025 | 3.555925    | 3.62949045  | 3.578294725 | 3.553707475 |
| "Fgd6"     | 8.007136    | 6.1771345   | 5.8602333   | 6.3856297   | 6.108823    | 7.1620817   | 6.6811647   | 7.4801764   |
| "Fgf1"     | 8.08280935  | 9.4095305   | 8.3453885   | 8.2307395   | 8.91545     | 8.933228    | 8.607914    | 8.328944    |
| "Fgf11"    | 2.67001     | 2.638842    | 2.5516908   | 2.6183872   | 2.6722767   | 2.6704392   | 2.652647    | 2.6689572   |
| "Fgf13"    | 2.3799562   | 2.3519697   | 2.2933161   | 2.3121848   | 2.3760757   | 2.3878736   | 2.368682    | 2.3628726   |
| "Fgf14"    | 2.9213471   | 2.922608    | 2.7624516   | 2.845062    | 2.9546642   | 2.9522548   | 2.8829985   | 3.0033813   |
| "Fgf16"    | 2.5681217   | 2.5368547   | 2.470392    | 2.4808438   | 2.5598886   | 2.549458    | 2.5393128   | 2.579638    |
| "Fgf17"    | 2.3763485   | 2.3424175   | 2.2718532   | 2.3026035   | 2.3648126   | 2.3630662   | 2.3532352   | 2.373246    |
| "Fgf2"     | 2.6554499   | 2.6270146   | 2.547711    | 2.5813246   | 2.6532614   | 2.6570697   | 2.6318312   | 2.653379    |
| "Fgf20"    | 2.5786638   | 2.5421696   | 2.4827447   | 2.5102317   | 2.5672836   | 2.5700927   | 2.5616348   | 2.5654018   |
| "Fgf21"    | 2.3215985   | 4.737104    | 2.2364125   | 2.182966    | 2.4118357   | 7.563272    | 2.3970373   | 2.3984492   |
| "Fgf22"    | 2.7490878   | 2.7212913   | 2.6733599   | 2.886094    | 2.7410846   | 2.7320237   | 2.7151382   | 2.7254686   |
| "Fgf3"     | 2.71599985  | 2.6868781   | 2.6362045   | 2.64190725  | 2.73762915  | 2.69383815  | 2.69932715  | 2.6901486   |
| "Fgf6"     | 2.4588819   | 2.429188    | 2.4068933   | 2.3969467   | 2.4483113   | 2.4491143   | 2.4523523   | 2.4535303   |
| "Fgf9"     | 2.4440913   | 2.4124184   | 2.3499224   | 2.3628292   | 2.4494684   | 2.4465683   | 2.4341855   | 2.493356    |
| "Fgfbp1"   | 2.5497513   | 2.5135753   | 2.4235983   | 2.484727    | 2.541411    | 2.533584    | 2.5345774   | 2.528439    |
| "Fgfr1"    | 4.2061834   | 4.0077734   | 3.6237028   | 3.8798087   | 3.6098742   | 3.7069466   | 3.3250792   | 3.8074255   |
| "Fgfr1op2" | 6.8443367   | 7.132997967 | 7.4550131   | 7.5577618   | 7.475428733 | 7.6828478   | 7.5843326   | 7.561767    |
| "Fgfr2"    | 5.960977    | 4.98568795  | 5.698113    | 5.67534185  | 4.954196    | 5.5420838   | 5.0888594   | 6.15789185  |
| "Fgfr3"    | 5.614728    | 6.3927584   | 5.3987455   | 6.658351    | 6.972703    | 5.7511706   | 6.8274355   | 6.9134536   |
| "Fgfr4"    | 4.221529833 | 4.09209     | 4.1123142   | 4.059887433 | 4.0049584   | 4.338068667 | 4.0310947   | 4.101777    |
| "Fgfrl1"   | 5.8778057   | 6.497368    | 5.452395    | 6.3551173   | 6.374874    | 5.561095    | 6.0811305   | 6.7381597   |
| "Fgg"      | 15.149832   | 14.822102   | 14.969187   | 14.794449   | 14.952148   | 14.928407   | 14.707488   | 14.932944   |
| "Fggy"     | 8.502784    | 8.818667    | 9.580491    | 10.270454   | 9.7514105   | 9.193699    | 10.109202   | 10.123927   |
| "Fgl1"     | 13.801136   | 13.30314    | 13.589787   | 13.182142   | 13.311733   | 13.695633   | 12.858873   | 13.103704   |
| "Fgl2"     | 5.73370005  | 4.4504749   | 6.9194755   | 5.3293469   | 5.095623    | 4.1469488   | 5.750228    | 5.125355    |
| "Fgr"      | 3.0471456   | 2.639684    | 2.8297136   | 3.7505502   | 2.649732    | 2.4589083   | 2.665412    | 2.6424117   |
| "Fhl1"     | 13.247188   | 12.206727   | 11.7548     | 11.913503   | 12.181236   | 12.564129   | 11.748095   | 12.033431   |
| "Fhdc1"    | 2.6936793   | 2.6323953   | 2.5757859   | 2.5645037   | 2.6455398   | 2.6364074   | 2.646429    | 2.6303017   |
| "Fhit"     | 4.6564875   | 5.917721    | 6.023038    | 6.781293    | 4.156458    | 4.098735    | 4.7609773   | 5.864715    |
| "Fhl1"     | 6.9591403   | 6.5260563   | 7.160889    | 6.843947    | 6.896604    | 7.3174195   | 6.9124      | 6.2568297   |
| "Fhl2"     | 2.8538432   | 2.786597    | 2.780662    | 2.8951118   | 2.8463829   | 2.8300588   | 2.8311841   | 2.8229825   |

|           |             |             |             |             |             |             |             |             |
|-----------|-------------|-------------|-------------|-------------|-------------|-------------|-------------|-------------|
| "Fhl4"    | 2.553226    | 2.5231347   | 2.4361389   | 2.4778485   | 2.5526175   | 2.5512805   | 2.5321207   | 2.6058404   |
| "Fbin"    | 2.6551027   | 3.0188007   | 2.5370643   | 2.5670476   | 2.6145914   | 2.628595    | 2.6451936   | 2.6249669   |
| "Fibp"    | 4.2621024   | 4.36918285  | 4.5726528   | 4.29215635  | 4.3664505   | 4.4767183   | 4.37113675  | 4.3348782   |
| "Ficd"    | 5.468851    | 4.869712    | 4.3364277   | 4.6788244   | 5.684202    | 4.9014025   | 4.8902683   | 4.8775597   |
| "Fig4"    | 5.5824533   | 6.26017     | 6.1166587   | 6.6370583   | 6.6635537   | 6.2169046   | 6.4515276   | 6.5294447   |
| "Figf"    | 3.0902775   | 3.9039171   | 3.4476984   | 3.610574367 | 3.425744567 | 3.607841567 | 3.3242961   | 3.725108    |
| "Fign"    | 3.5447192   | 4.434682    | 5.125172    | 5.7239003   | 4.919537    | 4.345325    | 5.1317053   | 5.118798    |
| "Fignl1"  | 2.367994    | 2.3422549   | 2.3174434   | 2.3331847   | 2.363859    | 2.3586774   | 2.5107205   | 2.3555474   |
| "Fip11"   | 8.259315    | 7.444604    | 7.0870719   | 7.2189083   | 7.31508765  | 7.58659125  | 7.4698851   | 7.39192725  |
| "Fis1"    | 8.83237     | 9.357544    | 9.119544    | 9.204863    | 9.135261    | 9.242299    | 9.012591    | 9.062615    |
| "Fitm1"   | 3.9246464   | 6.7422285   | 4.6045537   | 6.7571707   | 5.138917    | 4.225378    | 5.7947416   | 5.5969973   |
| "Fiz1"    | 6.6148887   | 5.970817    | 5.5320883   | 5.8737006   | 5.6417603   | 6.1916075   | 5.67341     | 5.9482017   |
| "Fjx1"    | 2.9895191   | 3.0405111   | 2.8570457   | 2.9830403   | 3.0335867   | 3.0132568   | 3.000209    | 3.020511    |
| "Fkbp10"  | 2.6126008   | 2.5784028   | 2.5249639   | 2.5573466   | 2.6038306   | 2.5824287   | 2.5853364   | 2.7570457   |
| "Fkbp11"  | 4.2541061   | 5.37980615  | 5.6310577   | 5.76243635  | 5.2392717   | 5.0943756   | 4.95747025  | 5.0883793   |
| "Fkbp15"  | 7.3490252   | 7.2519493   | 7.6865816   | 7.357255    | 7.0614233   | 7.432177    | 7.3537393   | 7.021253    |
| "Fkbp1a"  | 8.05067876  | 7.979863    | 8.07339522  | 7.92289566  | 7.93305034  | 7.91137366  | 8.10779534  | 7.96430988  |
| "Fkbp1b"  | 2.2027931   | 2.1698983   | 3.6060257   | 2.2085779   | 2.1849027   | 2.1820402   | 2.1919012   | 2.160126    |
| "Fkbp2"   | 9.921146    | 10.3645935  | 10.272722   | 10.5702305  | 10.506306   | 10.424345   | 10.570471   | 10.561258   |
| "Fkbp3"   | 8.3571575   | 8.336161    | 8.3233047   | 8.608737    | 8.389098    | 8.37331865  | 8.821302    | 8.8386815   |
| "Fkbp4"   | 4.6652675   | 5.29438715  | 5.59982175  | 5.681046    | 5.6000925   | 5.6419524   | 5.9969893   | 6.0394302   |
| "Fkbp5"   | 8.7063155   | 9.85500365  | 7.3311123   | 6.43078765  | 8.662872    | 9.17254265  | 6.2840641   | 6.22562875  |
| "Fkbp7"   | 6.692841    | 6.7644258   | 6.619654    | 6.867799    | 6.315518    | 5.8110714   | 6.56006     | 6.4301686   |
| "Fkbp8"   | 6.453842    | 7.0019326   | 7.521631    | 7.147645    | 7.0736375   | 6.9180865   | 7.0426154   | 7.076525    |
| "Fkbp9"   | 8.61187615  | 8.44307315  | 9.385991    | 8.90298485  | 8.944695    | 8.872211    | 9.290664    | 9.0215215   |
| "Fkbp1"   | 5.550584    | 6.100397    | 5.310424    | 5.579607    | 5.1836348   | 5.4351063   | 4.9479947   | 5.280048    |
| "Fktn"    | 3.1751733   | 3.548033    | 4.1996174   | 3.8491802   | 2.8710856   | 3.3041906   | 4.65968     | 3.621362    |
| "Flad1"   | 4.20487345  | 4.5401765   | 4.51165105  | 4.438181775 | 4.647363225 | 4.536638025 | 4.407493775 | 4.654418775 |
| "Flcn"    | 5.538882967 | 5.438200567 | 5.627016767 | 6.129579267 | 5.944048167 | 6.429123    | 5.969673667 | 6.42754442  |
| "Flg"     | 2.7524476   | 2.7285986   | 2.6163042   | 2.6668758   | 2.7692657   | 2.761473    | 2.7328467   | 2.7487476   |
| "Fli1"    | 4.7233547   | 4.09090115  | 4.9469154   | 4.425215    | 4.57148325  | 4.56434385  | 5.113999    | 4.19565475  |
| "Flii"    | 8.236157    | 8.39898625  | 8.9651495   | 8.7833195   | 8.66459     | 8.467803    | 9.01084     | 8.910802    |
| "Flna"    | 6.01723     | 5.1019154   | 6.2705684   | 5.6326966   | 5.657438    | 5.640075    | 5.426409    | 5.372345    |
| "Flnb"    | 6.3025517   | 9.095725    | 9.3859625   | 9.553895    | 8.404279    | 8.7446      | 9.881429    | 8.904468    |
| "Flnc"    | 3.9782515   | 4.073634    | 3.9768012   | 4.020775    | 4.0660625   | 4.1766424   | 4.063572    | 4.0525284   |
| "Flot1"   | 8.6406355   | 7.371962    | 8.423819    | 8.09758     | 7.793195    | 7.9914327   | 7.6797733   | 8.277089    |
| "Flot2"   | 7.18131585  | 7.811076    | 7.4524855   | 7.7061115   | 7.88661195  | 7.4574372   | 7.5040373   | 7.75931035  |
| "Flt1"    | 3.739665533 | 3.636474667 | 3.6123517   | 3.526019567 | 3.456070433 | 3.5058586   | 3.601933333 | 3.540094033 |
| "Flt3l"   | 3.065477    | 2.6828103   | 2.7933893   | 2.724794    | 2.720178    | 2.6936414   | 2.8416975   | 2.9370453   |
| "Flt4"    | 5.1373828   | 4.53544755  | 5.0259705   | 4.86816525  | 4.64255335  | 4.87330535  | 4.982758    | 4.75556835  |
| "Flywch1" | 4.6937153   | 4.8064773   | 4.7658626   | 4.7515273   | 4.8438085   | 5.06108     | 4.85872235  | 4.71669135  |
| "Flywch2" | 2.5466102   | 2.53597035  | 2.49927415  | 2.4986403   | 2.5220386   | 2.574794    | 2.8217629   | 2.54220025  |
| "Fmn1"    | 2.3940234   | 2.364838    | 2.3825853   | 2.3394446   | 2.395088    | 2.3706524   | 2.3835707   | 2.3747327   |
| "Fmn2"    | 5.22262565  | 6.9930105   | 2.88492     | 5.0167585   | 3.02633775  | 5.1381635   | 2.75106285  | 3.1053873   |
| "Fmnl3"   | 3.9036076   | 3.536017    | 3.9989974   | 3.8567622   | 3.8977077   | 3.8864126   | 3.8991883   | 3.8707423   |
| "Fmo1"    | 11.126103   | 10.467762   | 11.27496    | 11.063013   | 11.097871   | 10.022833   | 10.944979   | 10.577651   |
| "Fmo2"    | 6.1281265   | 6.0185056   | 3.797839833 | 4.58439     | 5.622990133 | 6.070855767 | 3.411739    | 4.949879133 |
| "Fmo3"    | 9.216524    | 9.055613    | 3.3977041   | 5.7147493   | 5.5854607   | 6.5470676   | 2.6229005   | 5.8006864   |
| "Fmo4"    | 2.3971565   | 2.393554    | 2.351755    | 2.26264     | 2.4034328   | 2.3710525   | 2.395126    | 2.423002    |
| "Fmo5"    | 9.7458055   | 10.892757   | 10.5409725  | 10.257913   | 10.8947145  | 10.515666   | 10.661207   | 10.382595   |
| "Fmod"    | 3.215653    | 3.33117375  | 3.447829025 | 3.289591575 | 3.5266495   | 3.09443175  | 3.388142625 | 3.513104275 |
| "Fmr1"    | 6.21229085  | 6.136907    | 6.22894025  | 6.11544495  | 6.21475375  | 6.1734414   | 6.15704715  | 6.27033485  |
| "Fmr1nb"  | 2.2069213   | 2.1748276   | 2.1379611   | 4.7651253   | 2.1942759   | 2.1859622   | 2.1981459   | 4.008591    |
| "Fn1"     | 10.0305373  | 10.49495865 | 10.56719385 | 10.781409   | 11.1496835  | 10.666701   | 11.1301895  | 10.9901865  |
| "Fn3k"    | 5.1379337   | 5.4668045   | 5.0738573   | 6.573912    | 6.367593    | 6.296399    | 6.283463    | 6.643481    |
| "Fnbp1"   | 3.965474    | 3.109738    | 4.0309625   | 3.8945127   | 3.6237206   | 3.8773274   | 4.003599    | 3.9230165   |
| "Fnbp4"   | 4.87770925  | 5.04832675  | 4.80018985  | 4.75687205  | 4.95186115  | 4.9719584   | 4.793306    | 5.1484634   |
| "Fndc1"   | 2.4874244   | 3.5187354   | 2.3816895   | 2.4112172   | 2.4712183   | 2.4664645   | 2.4647737   | 2.460901    |
| "Fndc3a"  | 10.028219   | 9.439251    | 10.003555   | 10.013849   | 9.84738     | 9.933289    | 10.155908   | 10.279657   |
| "Fndc4"   | 5.2108707   | 5.7259367   | 5.46079     | 5.5935006   | 5.9014347   | 5.5365243   | 5.84523965  | 5.7058033   |
| "Fnta"    | 8.901942    | 9.548844    | 9.317855    | 9.24954     | 9.331115    | 9.647809    | 9.270264    | 9.350908    |
| "Fntb"    | 3.070249    | 3.2028017   | 3.0573697   | 3.0855496   | 3.0585861   | 3.045537    | 3.0467534   | 3.040536    |
| "Folh1"   | 2.6090436   | 2.5897868   | 2.4905457   | 2.5286741   | 2.6102922   | 2.6066656   | 2.5891058   | 2.6280687   |
| "Folr1"   | 2.5068576   | 2.4745586   | 2.449636    | 2.4436133   | 2.4995553   | 2.4956906   | 2.4975893   | 2.48504     |
| "Folr2"   | 8.736571    | 6.3659053   | 9.08058     | 8.880415    | 7.426456    | 6.5102224   | 8.4575615   | 8.003166    |
| "Folr4"   | 2.3027506   | 2.2855606   | 2.2343092   | 2.253507    | 2.3095036   | 2.4905977   | 2.3023753   | 2.2997394   |
| "Fos"     | 10.178496   | 7.563558    | 8.142551    | 8.097417    | 6.462641    | 7.2076297   | 9.748388    | 7.185686    |
| "Fosl1"   | 2.4078212   | 2.3725014   | 2.3322096   | 2.335699    | 2.3926847   | 2.3887088   | 2.3957915   | 2.3745692   |
| "Foxa1"   | 6.155225    | 8.01312     | 6.945335    | 7.577989    | 7.659359    | 7.784486    | 7.8900294   | 9.728172    |
| "Foxa2"   | 7.1058273   | 9.001108    | 8.908797    | 8.646775    | 9.32782     | 8.869803    | 8.663272    | 8.942055    |
| "Foxa3"   | 8.912736    | 8.566296    | 8.984576    | 9.12354     | 8.149897    | 9.05174     | 9.137657    | 8.843246    |
| "Foxc1"   | 3.1155734   | 3.0840678   | 2.9303732   | 3.0187988   | 3.1442695   | 3.1480753   | 3.0223932   | 3.20797     |
| "Foxc2"   | 2.4551287   | 2.4279945   | 2.390566    | 2.4117134   | 2.4530349   | 2.4539464   | 2.443861    | 2.4395041   |
| "Foxd1"   | 2.3389812   | 2.3137887   | 2.2593138   | 2.2859433   | 2.3342276   | 2.402924    | 2.3323355   | 2.3650353   |
| "Foxf1"   | 2.4072542   | 2.374509    | 2.2787447   | 2.3100119   | 2.3974016   | 2.4396677   | 2.364254    | 2.3916705   |
| "Foxf2"   | 3.1173203   | 3.1326072   | 2.9556198   | 3.0301437   | 3.1865396   | 3.1860113   | 3.0797164   | 3.1714447   |
| "Foxg1"   | 2.7690003   | 2.7828095   | 2.6133976   | 2.6702533   | 2.795136    | 2.7949815   | 2.7369614   | 2.7982054   |
| "Foxh1"   | 2.8449784   | 2.8230885   | 2.7324809   | 2.74888415  | 2.8460205   | 2.85428605  | 2.83460775  | 2.85351085  |
| "Foxj1"   | 3.076681    | 3.1268294   | 3.005205    | 3.0248742   | 3.1757624   | 3.3048444   | 3.061113    | 3.052855    |
| "Foxj2"   | 4.0874561   | 4.15650325  | 4.21206335  | 4.31689985  | 3.89587745  | 4.254791    | 4.2657873   | 4.1620019   |
| "Foxj3"   | 5.9010245   | 5.6132135   | 5.34052925  | 5.6798005   | 5.5862578   | 5.63793505  | 5.3488533   | 5.50783685  |

|           |             |             |             |             |             |             |             |             |
|-----------|-------------|-------------|-------------|-------------|-------------|-------------|-------------|-------------|
| "Foxk1"   | 2.3139057   | 2.7320585   | 2.1816869   | 2.1996071   | 2.2416136   | 2.236181    | 2.2418625   | 2.227952    |
| "Foxk2"   | 4.8714802   | 4.824829333 | 4.970041033 | 3.8850081   | 4.763905833 | 4.817473733 | 4.5093307   | 4.7572202   |
| "Foxm1"   | 2.41608345  | 2.39688335  | 2.3998324   | 2.3731825   | 2.4114962   | 2.40806925  | 2.37419605  | 2.406072    |
| "Foxn2"   | 7.959004    | 7.256984    | 7.1756763   | 7.774461    | 7.6733694   | 7.6100245   | 7.6594524   | 7.431434    |
| "Foxn4"   | 2.4728374   | 2.4384115   | 2.3891983   | 2.4309907   | 2.4575543   | 2.4530957   | 2.3802614   | 2.4465287   |
| "Foxo1"   | 7.562121133 | 7.6863466   | 6.79577233  | 6.730186367 | 7.594375433 | 8.011230333 | 7.201559667 | 6.796780167 |
| "Foxo3"   | 6.7098429   | 6.308367433 | 5.7161995   | 6.1933169   | 5.7401444   | 6.2967296   | 5.882846367 | 5.9698037   |
| "Foxp1"   | 7.607441057 | 5.396030114 | 5.660447871 | 5.421971214 | 5.517916014 | 6.1465297   | 5.8026233   | 5.798082614 |
| "Foxp2"   | 2.4367142   | 2.5279334   | 2.5740752   | 2.389683    | 2.4541883   | 2.5106444   | 2.7074912   | 2.4273999   |
| "Foxp3"   | 2.386061    | 2.355019    | 2.3179631   | 2.3435388   | 2.3832521   | 2.3748372   | 2.3822756   | 2.374025    |
| "Foxq1"   | 3.5341454   | 3.622301    | 4.9244204   | 3.8697286   | 3.514989    | 2.8763363   | 3.5597954   | 4.6412077   |
| "Foxred1" | 7.4486513   | 8.531996    | 8.083183    | 7.6792736   | 8.607099    | 7.504531    | 7.748721    | 8.237585    |
| "Fpgs"    | 7.156384    | 8.415006    | 8.043786    | 7.8251333   | 8.638703    | 8.469756    | 8.67424     | 7.5249057   |
| "Fpr1"    | 5.6349607   | 6.4486413   | 8.402998    | 7.863665    | 7.197972    | 7.9779778   | 7.496075    | 7.0443573   |
| "Fpr2"    | 8.403134    | 6.9330053   | 9.156476    | 8.3007765   | 7.4048834   | 8.026463    | 7.6814275   | 7.4456396   |
| "Fpr3"    | 2.4683194   | 2.442834    | 2.3894944   | 2.4260015   | 2.4721549   | 2.4612982   | 2.4599328   | 2.4492383   |
| "Frat1"   | 2.7119093   | 2.8856418   | 2.586966    | 2.637938    | 2.7134123   | 2.7059941   | 2.6756816   | 2.6777577   |
| "Frat2"   | 2.895489    | 2.458608    | 2.4325955   | 2.4480913   | 2.480654    | 2.4731746   | 2.4792147   | 2.4672766   |
| "Frg1"    | 6.70781     | 6.688551    | 6.8086286   | 6.8347063   | 6.623164    | 6.656486    | 7.0203643   | 6.9008713   |
| "Frk"     | 3.890947667 | 3.89923     | 4.8240835   | 3.994825433 | 3.9831495   | 3.964078733 | 3.880812    | 3.878441467 |
| "Frm4b"   | 8.39604545  | 6.874403875 | 8.1726617   | 7.1816005   | 6.819362625 | 7.238777    | 7.5968445   | 7.101157675 |
| "Frm6"    | 5.663529    | 4.7646046   | 5.906727    | 5.6498656   | 5.791658    | 5.611187    | 5.6553473   | 5.458642    |
| "Frm8"    | 4.747246    | 7.229747    | 6.545428    | 6.9058704   | 6.86329     | 6.407603    | 6.967635    | 6.37142     |
| "Frrs1"   | 7.4183927   | 7.0718136   | 7.934659    | 7.4886518   | 7.49728     | 8.10668     | 7.839309    | 8.097537    |
| "Frs3"    | 3.5305662   | 3.4942884   | 3.292255    | 3.4193618   | 3.51313     | 3.5076253   | 4.122319    | 3.4971385   |
| "Fryl"    | 6.929002    | 6.86991335  | 6.9103673   | 6.78038325  | 6.7968228   | 6.94998095  | 7.1073732   | 6.7286325   |
| "Frzb"    | 4.2068443   | 3.5995684   | 5.388687    | 4.966324    | 3.8534086   | 3.7371383   | 4.172133    | 4.0794024   |
| "Fscn1"   | 6.1380598   | 4.9169678   | 6.40732315  | 6.1555374   | 4.9906645   | 5.00186215  | 6.359968    | 5.8708625   |
| "Fscn3"   | 2.589879    | 2.5596263   | 2.5330598   | 2.4917786   | 2.5812173   | 2.5954468   | 2.552448    | 2.562587    |
| "Fsp1"    | 2.70873685  | 2.68201825  | 2.60586645  | 2.62110735  | 2.7167615   | 2.7298751   | 2.6659128   | 2.7103398   |
| "Fst"     | 10.066956   | 6.070982    | 8.308121    | 6.5744476   | 5.732402    | 5.497575    | 6.673278    | 6.0509543   |
| "Fstl1"   | 6.1950533   | 5.0138825   | 6.53547865  | 5.839611    | 5.33888085  | 4.644496    | 5.86232185  | 5.31873235  |
| "Fstl3"   | 2.741952    | 2.6019979   | 2.5747454   | 2.5782905   | 2.605923    | 2.6119695   | 2.6051338   | 2.652095    |
| "Ftcd"    | 11.768748   | 12.424511   | 12.320539   | 12.353533   | 12.028528   | 12.312041   | 11.890638   | 12.478327   |
| "Fth1"    | 14.45892    | 14.3949425  | 14.5119545  | 14.483698   | 14.221354   | 14.0961635  | 14.2310225  | 13.943733   |
| "Fthl17"  | 2.5405      | 2.5155554   | 2.4204845   | 2.4914153   | 2.5455863   | 2.5311952   | 2.5294335   | 2.5234184   |
| "Ftl1"    | 12.19315133 | 12.29039533 | 12.25435533 | 12.25151783 | 12.27082583 | 12.23634767 | 12.12927967 | 11.77724067 |
| "Fto"     | 5.47499505  | 5.7446104   | 5.32418255  | 5.2897658   | 5.5343566   | 5.32536775  | 5.50114725  | 5.542103    |
| "Ftsj1"   | 6.8218317   | 6.554041    | 6.3052263   | 6.417698    | 6.6970906   | 6.883419    | 6.569199    | 6.5591474   |
| "Ftsj2"   | 4.608962    | 4.4325504   | 5.2715216   | 4.8527956   | 4.7854457   | 4.951193    | 5.0007195   | 5.0592403   |
| "Ftsj3"   | 7.8230634   | 8.117319    | 7.3269033   | 6.9648676   | 7.803032    | 7.8343945   | 7.0496526   | 7.298866    |
| "Ftsjd1"  | 3.76436555  | 3.01714525  | 2.9884945   | 2.96638385  | 3.08476695  | 3.36420365  | 3.05908925  | 2.9934083   |
| "Ftsjd2"  | 5.215385    | 5.39196685  | 5.5856317   | 5.56081035  | 5.2693325   | 5.332743    | 5.4283645   | 5.4920655   |
| "Fubp1"   | 6.428640925 | 6.938109675 | 6.482947925 | 6.80576355  | 7.0592831   | 7.26598     | 7.11633885  | 7.300974    |
| "Fuca1"   | 8.842935333 | 9.200330467 | 8.8415892   | 8.854076333 | 9.059566333 | 9.252204567 | 8.944003067 | 9.012950533 |
| "Fuca2"   | 6.4757595   | 5.8688474   | 7.1713324   | 6.326483    | 6.382699    | 6.113357    | 6.707159    | 5.8292084   |
| "Fundc1"  | 6.7415075   | 5.83953025  | 6.5318448   | 6.19461655  | 5.820028    | 6.14514545  | 6.03181145  | 5.7685788   |
| "Fundc2"  | 5.001055833 | 5.161574633 | 5.0664967   | 5.048541867 | 4.724808633 | 4.950764    | 4.994978267 | 5.0919777   |
| "Furin"   | 8.00747     | 8.149614    | 7.1586876   | 7.517971    | 8.029926    | 8.018541    | 7.340989    | 7.549543    |
| "Fus"     | 8.925570667 | 9.17855333  | 8.891239333 | 8.914521333 | 8.874037667 | 8.461437    | 8.864387333 | 8.74119     |
| "Fut8"    | 5.6459575   | 4.725946    | 5.9349327   | 5.180242    | 4.639636    | 5.130857    | 5.5026493   | 4.5059805   |
| "Fut9"    | 3.1711266   | 3.1683662   | 3.0020256   | 3.0873861   | 3.2511897   | 3.2286963   | 3.1265569   | 3.2205763   |
| "Fxc1"    | 7.39244425  | 7.450082825 | 7.683130575 | 7.48735065  | 7.537718825 | 7.4602915   | 7.37914155  | 7.371417575 |
| "Fxn"     | 6.9663277   | 7.659297    | 7.0688868   | 7.037011    | 6.731628    | 7.143556    | 7.0036907   | 7.306102    |
| "Fxr1"    | 8.83374175  | 8.981983    | 8.22228175  | 8.43842275  | 8.704904    | 9.17670375  | 8.4196377   | 8.5667395   |
| "Fxr2"    | 5.9572334   | 6.090641    | 5.220988    | 5.0832887   | 5.758894    | 6.3532453   | 5.5779047   | 5.6693783   |
| "Fxyd1"   | 10.277244   | 11.117424   | 10.728047   | 11.204471   | 11.045959   | 10.812986   | 10.908344   | 11.029705   |
| "Fxyd2"   | 2.9173999   | 2.9424541   | 2.8064328   | 2.85736455  | 2.9902862   | 2.92603115  | 2.85736345  | 2.9373982   |
| "Fxyd3"   | 2.699012    | 2.6517782   | 3.095306    | 2.6455586   | 3.1431751   | 2.6759975   | 3.043073    | 2.5924754   |
| "Fxyd4"   | 3.319594    | 3.281742    | 3.24671     | 3.267314    | 3.3526487   | 3.2962947   | 3.3090308   | 3.2904155   |
| "Fxyd5"   | 6.1747274   | 4.8833127   | 6.641085    | 5.8790455   | 5.2964373   | 5.242408    | 5.501074    | 4.985835    |
| "Fyb"     | 8.796695    | 6.481529    | 9.222762    | 8.324105    | 7.200178    | 7.482547    | 7.964344    | 7.7726855   |
| "Fyc01"   | 6.7518616   | 7.6281853   | 7.2510877   | 8.0594      | 7.7705364   | 7.5189967   | 7.9118114   | 7.7176876   |
| "Fyn"     | 7.21984505  | 5.499976    | 6.6980717   | 6.55845815  | 5.65976235  | 5.0650415   | 6.82569005  | 6.2021694   |
| "Fydd1"   | 6.690970467 | 6.411962467 | 5.742992    | 5.927342133 | 6.0928744   | 6.062989667 | 6.223517867 | 6.157281167 |
| "Fzd1"    | 2.48799     | 2.458902    | 2.3793983   | 2.4140449   | 2.4854233   | 2.4823008   | 2.4743004   | 2.4772353   |
| "Fzd2"    | 2.4292796   | 2.400024    | 2.3223057   | 2.4948747   | 2.42097     | 2.418878    | 2.4168477   | 2.4145575   |
| "Fzd3"    | 2.47442445  | 2.4531248   | 2.3792305   | 2.46724045  | 2.4810789   | 2.4932373   | 2.4542768   | 2.507169    |
| "Fzd4"    | 4.00848745  | 4.31943925  | 4.3484886   | 4.31696985  | 4.4104157   | 3.87144435  | 4.4746552   | 4.3794105   |
| "Fzd6"    | 5.184304    | 5.5272818   | 5.105088    | 5.324301    | 4.741234    | 5.173519    | 5.2803392   | 5.5700264   |
| "Fzd7"    | 4.2782154   | 6.4239373   | 6.408545    | 6.4592843   | 5.802427    | 6.418367    | 6.8737326   | 6.9350214   |
| "Fzd8"    | 5.5053697   | 5.388943    | 4.864085    | 5.730517    | 5.2482166   | 4.055802    | 5.411426    | 6.3172174   |
| "Fzr1"    | 3.0823274   | 3.267821    | 3.5521255   | 3.229112    | 3.220551    | 3.2073894   | 3.2406006   | 3.284402    |
| "G0s2"    | 3.7327204   | 6.7457533   | 5.374713    | 6.344755    | 7.5690966   | 7.5986457   | 7.9977503   | 6.260396    |
| "G3bp1"   | 5.3531776   | 5.27932525  | 5.5091831   | 5.1716931   | 5.42415875  | 5.58913875  | 5.33713815  | 5.3492548   |
| "G3bp2"   | 9.311616633 | 9.688346    | 9.916994333 | 9.6201108   | 9.533853767 | 9.038402567 | 9.413568    | 9.225119333 |
| "G6pc"    | 12.885304   | 12.459976   | 10.378561   | 10.2146     | 11.856228   | 12.129315   | 11.082501   | 11.456451   |
| "G6pc2"   | 2.5777178   | 2.5495698   | 2.4796112   | 2.5202048   | 2.5743737   | 2.5973723   | 2.565917    | 2.561891    |
| "G6pc3"   | 2.6030343   | 2.7084942   | 2.6428256   | 2.6049669   | 2.604189    | 2.6260684   | 2.7961116   | 2.5552037   |
| "G6pd2"   | 2.80748435  | 2.78062585  | 2.70388415  | 2.72376845  | 2.8240032   | 2.8096238   | 2.77014935  | 2.80469405  |
| "G6pdx"   | 5.2916737   | 3.900479    | 5.5618305   | 4.5128913   | 4.1244416   | 3.9149177   | 4.002723    | 3.8489156   |

|              |             |             |             |             |             |             |             |             |
|--------------|-------------|-------------|-------------|-------------|-------------|-------------|-------------|-------------|
| "Gaa"        | 7.987153    | 8.2924237   | 7.9088655   | 7.9739128   | 8.2465112   | 8.769174    | 7.905103    | 8.0207957   |
| "Gab1"       | 7.14230225  | 7.04260205  | 6.65956185  | 7.242453    | 7.16409915  | 7.18888785  | 6.90470965  | 7.075669    |
| "Gabarap"    | 10.688945   | 10.828305   | 10.818541   | 10.798506   | 10.808479   | 10.818494   | 10.681238   | 10.696982   |
| "Gabarapl1"  | 11.7521655  | 11.157687   | 11.1754295  | 11.937144   | 11.2086495  | 12.124168   | 11.639967   | 11.97195875 |
| "Gabarapl2"  | 9.607916    | 10.075582   | 9.173351    | 9.610532    | 9.450274    | 9.649813    | 9.074426    | 9.467314    |
| "Gabbr1"     | 2.724498033 | 2.686157633 | 2.650084233 | 2.669228867 | 2.710623533 | 2.701097433 | 2.697094167 | 2.697674833 |
| "Gabpa"      | 7.16939765  | 7.392827    | 7.0622865   | 7.118823    | 7.347918    | 7.34852565  | 7.610244    | 7.38182475  |
| "Gabpb1"     | 3.084845    | 3.0506991   | 2.94478     | 3.02450085  | 3.0151773   | 3.1111596   | 3.07464335  | 3.463498    |
| "Gabra1"     | 2.6623555   | 2.6491677   | 2.5324802   | 2.57819135  | 2.6891122   | 2.6924135   | 2.6503366   | 2.6681118   |
| "Gabra2"     | 2.6226506   | 2.6326265   | 2.5055475   | 2.5592546   | 2.6330276   | 2.6238036   | 2.6099105   | 2.6400805   |
| "Gabra6"     | 2.4471476   | 2.41302475  | 2.375893    | 2.38965895  | 2.4358119   | 2.44807425  | 2.43839665  | 2.42688595  |
| "Gabrb3"     | 2.6123693   | 2.5808043   | 2.5162532   | 2.5441544   | 2.613833    | 2.6109104   | 2.600606    | 2.6344943   |
| "Gabrg1"     | 2.541956    | 2.5149698   | 2.4255643   | 2.483543    | 2.5484767   | 2.5379815   | 2.523808    | 2.5743258   |
| "Gabrp"      | 2.180194    | 2.148562    | 2.306283    | 2.1282475   | 2.1683943   | 2.1582773   | 2.1712942   | 2.153352    |
| "Gad1"       | 2.8476057   | 2.8253412   | 2.698943    | 2.7564087   | 2.8645577   | 2.8711412   | 2.8167057   | 2.870715    |
| "Gad2"       | 2.2047815   | 3.4748282   | 2.1133726   | 2.1444397   | 2.1996353   | 4.4199476   | 2.1961162   | 2.1782746   |
| "Gadd45a"    | 9.150107    | 3.0557506   | 5.7436156   | 6.236707    | 4.332445    | 5.7765822   | 6.910379    | 6.859795    |
| "Gadd45b"    | 8.761055    | 7.3891377   | 5.195939    | 4.5976557   | 5.648589    | 5.8764484   | 3.9764445   | 3.88033775  |
| "Gadd45g"    | 12.88351    | 10.040215   | 10.444484   | 8.423807    | 8.010262    | 8.45841     | 6.0338607   | 8.502672    |
| "Gadd45gip1" | 5.0955458   | 5.395699    | 5.54130515  | 5.3494662   | 5.460133    | 5.48411095  | 5.49854165  | 5.4359717   |
| "Gak"        | 7.8880124   | 7.8508945   | 7.6237426   | 7.7879157   | 8.19461     | 8.090075    | 7.7828445   | 7.8730683   |
| "Gal3st1"    | 2.3485482   | 2.2774494   | 2.3536327   | 2.1716065   | 2.2804143   | 2.2081614   | 2.2873378   | 2.2613063   |
| "Galc"       | 3.9224811   | 3.9835205   | 3.95370925  | 3.9283992   | 3.893605    | 4.3073548   | 3.97039085  | 3.96692505  |
| "Gale"       | 2.6067598   | 3.0977576   | 6.220271    | 3.0901537   | 3.1194947   | 2.5799782   | 4.0715933   | 3.1589189   |
| "Galk1"      | 7.516529    | 8.302548    | 8.286454    | 7.656418    | 8.669446    | 7.924406    | 8.361373    | 8.375313    |
| "Galk2"      | 6.615722    | 6.2164345   | 7.447631    | 7.221571    | 6.89093     | 6.671135    | 7.074234    | 6.9845753   |
| "Galm"       | 8.369578    | 8.6259032   | 8.89423365  | 9.1799895   | 9.24239465  | 8.32742085  | 9.3691975   | 9.4857923   |
| "Galns"      | 3.064913    | 2.8669913   | 3.4798803   | 3.2471557   | 3.7729995   | 3.447277    | 3.4727452   | 3.5314155   |
| "Galnt1"     | 7.6357205   | 7.8050995   | 7.99546735  | 7.6108265   | 7.55368205  | 7.54939125  | 7.62707115  | 7.57000875  |
| "Galnt10"    | 3.39920615  | 2.9674455   | 3.40875195  | 3.48152735  | 3.3808765   | 3.22405065  | 3.94882785  | 3.3460286   |
| "Galnt11"    | 6.390172    | 6.0827155   | 6.363539    | 6.126182    | 5.360347    | 6.096631    | 5.9813466   | 5.758282    |
| "Galnt2"     | 6.5792367   | 7.001694667 | 6.244531567 | 6.014888333 | 7.326263667 | 7.19839     | 6.523370033 | 5.868409333 |
| "Galnt3"     | 3.21113135  | 3.0591605   | 3.05628885  | 3.007759    | 3.1304748   | 3.1586096   | 3.13757355  | 3.12447775  |
| "Galnt4"     | 5.131997    | 4.93018915  | 5.2581439   | 5.06933775  | 5.2334907   | 5.19328405  | 5.26278615  | 5.25964715  |
| "Galnt7"     | 4.018394667 | 3.9462328   | 4.057866567 | 3.989335067 | 3.6730971   | 3.9619808   | 3.637602867 | 4.0027198   |
| "Galr3"      | 5.3233554   | 5.57257435  | 6.11538065  | 5.982775    | 5.20131415  | 5.00891875  | 5.8503356   | 6.05121625  |
| "Galt"       | 7.933013    | 8.430766    | 8.871786    | 8.595432    | 8.579165    | 8.658867    | 9.343833    | 9.014615    |
| "Gamt"       | 7.5735083   | 7.947263    | 9.293892    | 10.624495   | 9.921185    | 5.503666    | 10.464962   | 10.568617   |
| "Ganab"      | 5.0084917   | 5.06990135  | 5.19280055  | 5.02693735  | 5.248635    | 5.327366    | 5.38898335  | 5.1932832   |
| "Ganc"       | 4.1646504   | 5.6375437   | 6.365376    | 6.16697     | 5.866173    | 6.496301    | 6.201794    | 6.0711794   |
| "Gap43"      | 2.733141    | 2.711252    | 2.597693    | 2.6644094   | 2.7532861   | 2.752165    | 2.7008736   | 2.7450027   |
| "Gapdh"      | 9.3764746   | 10.03123863 | 9.63208575  | 9.916388925 | 10.12669913 | 9.98973485  | 9.729934375 | 9.90978785  |
| "Gar1"       | 7.854786    | 7.7035275   | 7.371499    | 6.975209    | 7.6240644   | 7.8672314   | 6.7570543   | 7.052743    |
| "Gars"       | 8.893753    | 9.280439    | 8.785753    | 8.517546    | 9.051251    | 9.35276     | 8.587694    | 8.544772    |
| "Gart"       | 5.143837733 | 5.2524311   | 5.659876367 | 5.3946684   | 5.406457167 | 5.493885533 | 5.436308067 | 5.406909633 |
| "Gas1"       | 6.36863325  | 6.328511    | 6.49711065  | 8.107998    | 7.03522365  | 6.37284155  | 7.8792395   | 7.7184955   |
| "Gas2"       | 6.4865932   | 6.582317    | 7.2412133   | 9.165085    | 7.5934772   | 8.074167    | 8.9804945   | 9.491895    |
| "Gas5"       | 8.38622356  | 9.21041086  | 8.56852624  | 8.4629514   | 8.95428408  | 9.46014558  | 8.31140464  | 8.7530899   |
| "Gas6"       | 7.7798767   | 6.3679395   | 8.957208    | 7.566666    | 7.369524    | 5.4600496   | 7.445838    | 7.09452     |
| "Gas7"       | 2.8938227   | 2.8647423   | 2.785396    | 2.7965398   | 2.8898263   | 2.8882694   | 2.8791819   | 2.919035    |
| "Gas8"       | 3.5990875   | 3.6388497   | 3.521072    | 3.623114    | 3.587125    | 3.575734    | 3.619616    | 3.72091     |
| "Gata1"      | 2.2450333   | 2.3505962   | 2.1558604   | 2.180611    | 2.2268093   | 2.2187417   | 2.232036    | 2.2110753   |
| "Gata2"      | 3.1268413   | 3.2197683   | 3.0762877   | 3.0256257   | 3.1078296   | 3.135933    | 3.0858703   | 3.08929     |
| "Gata3"      | 2.3852775   | 2.3520103   | 2.313373    | 2.3361747   | 2.3725293   | 2.3596094   | 2.370845    | 2.3580806   |
| "Gata4"      | 2.540225    | 2.6574101   | 2.926622    | 2.9196105   | 2.689439    | 2.6801193   | 2.7163336   | 2.4674559   |
| "Gata5"      | 2.1767569   | 2.4971712   | 2.0944064   | 2.1200435   | 2.1637583   | 2.1552315   | 2.1642828   | 2.148813    |
| "Gata6"      | 5.7732553   | 4.98273815  | 4.877272    | 4.5245229   | 4.9149519   | 5.34914055  | 4.7993783   | 3.8203998   |
| "Gatad1"     | 7.222936    | 7.6943655   | 7.3454282   | 7.5506437   | 7.427459    | 7.527035    | 7.42610465  | 7.49388165  |
| "Gatad2a"    | 6.6896518   | 6.949521633 | 6.1360734   | 6.3285345   | 6.927224    | 6.6008363   | 6.5396601   | 6.566785767 |
| "Gatad2b"    | 5.2448153   | 5.211979    | 5.1780367   | 5.292778    | 5.2308264   | 5.3187375   | 5.064753    | 4.9188447   |
| "Gatc"       | 5.0899625   | 5.7162952   | 5.1648097   | 5.512511    | 5.4241357   | 5.415029    | 5.42815     | 5.4098616   |
| "Gatm"       | 7.3910775   | 5.3933783   | 8.610236    | 7.8791566   | 6.793326    | 5.048049    | 8.62415     | 7.278049    |
| "Gatsl2"     | 3.7318873   | 3.5759406   | 3.6418593   | 3.7680032   | 3.707059    | 3.7028263   | 3.8181329   | 3.6100016   |
| "Gba"        | 7.79249815  | 7.7357505   | 8.4758705   | 7.8580688   | 7.50385815  | 7.6239495   | 7.734192    | 7.7939995   |
| "Gba2"       | 3.18522475  | 3.2961167   | 3.53115155  | 3.3574812   | 3.6901324   | 3.35166955  | 3.3472525   | 3.7493773   |
| "Gbas"       | 7.437431    | 7.5986333   | 7.126774    | 7.1564245   | 7.2444196   | 7.390794    | 7.0775723   | 7.1060715   |
| "Gbe1"       | 9.46377     | 9.872923    | 10.644027   | 10.895199   | 10.750118   | 9.752235    | 10.387718   | 10.436096   |
| "Gbfl1"      | 5.7875538   | 6.2979231   | 6.2311394   | 5.99274945  | 6.24867585  | 6.2322963   | 5.8560905   | 5.8361304   |
| "Gbg1"       | 2.412912    | 2.3906567   | 2.3546875   | 2.3742468   | 2.4102278   | 2.3995688   | 2.4020884   | 2.397185    |
| "Gbp1"       | 2.3189075   | 2.0981746   | 6.089142    | 4.250651    | 3.552608    | 2.1268349   | 6.4559402   | 5.3906736   |
| "Gbp2"       | 8.2237372   | 5.72781635  | 10.2667135  | 9.150461    | 6.6787115   | 5.6282259   | 8.2542015   | 7.5271175   |
| "Gbp3"       | 7.846544    | 6.349045    | 9.612846    | 9.320664    | 7.1362977   | 6.6215425   | 8.627092    | 7.8701024   |
| "Gbp6"       | 6.4636416   | 5.4699593   | 9.302697    | 9.424036    | 6.103903    | 5.3013945   | 9.124038    | 8.107361    |
| "Gbp7"       | 8.420454    | 8.03031015  | 10.377287   | 9.964245    | 8.3522393   | 7.5282095   | 9.198661    | 8.6307805   |
| "Gbp8"       | 7.306787    | 5.293999    | 9.467359    | 8.469856    | 6.789155    | 6.4971147   | 8.174553    | 7.266108    |
| "Gbx2"       | 2.6547997   | 2.6350963   | 2.5603886   | 2.557338    | 2.7599623   | 2.6782274   | 2.6200213   | 2.6427958   |
| "Gc"         | 14.875868   | 14.993254   | 14.899121   | 15.046105   | 15.16394    | 15.086725   | 14.987065   | 15.014412   |
| "Gca"        | 4.47419375  | 4.4590584   | 4.68833815  | 4.37971     | 4.355348    | 4.4315012   | 4.3811555   | 4.46964335  |
| "Gcap14"     | 7.08239     | 6.9915624   | 7.1820607   | 7.265815    | 6.7478337   | 7.0157614   | 7.1419744   | 7.2819705   |
| "Gcap8"      | 2.713653    | 2.7066617   | 2.587062    | 2.631357    | 2.7501454   | 2.7496347   | 2.6879764   | 2.7509048   |
| "Gcc1"       | 3.9478386   | 3.98294285  | 4.31710475  | 4.20358835  | 4.39603675  | 3.9928701   | 4.4165306   | 4.14437185  |

|          |             |             |             |             |             |             |             |             |
|----------|-------------|-------------|-------------|-------------|-------------|-------------|-------------|-------------|
| "Gcc2"   | 4.4771767   | 4.402376    | 3.747289    | 3.765554    | 3.6936529   | 3.8976893   | 4.005826    | 3.4119122   |
| "Gcdh"   | 10.971686   | 11.162838   | 11.092801   | 11.388028   | 11.504064   | 10.803891   | 11.571995   | 11.372915   |
| "Gcfc1"  | 6.92675985  | 6.65264285  | 6.7733371   | 6.676726    | 6.3972978   | 7.0497313   | 6.779397    | 6.43753315  |
| "Gcg2"   | 2.404561    | 2.38302     | 2.3041167   | 2.3742006   | 2.4008856   | 2.4028494   | 2.394547    | 2.389357    |
| "Gcgr"   | 9.810416    | 10.466793   | 9.902527    | 10.445021   | 10.748529   | 10.595374   | 10.459972   | 10.804625   |
| "Gch1"   | 11.3677505  | 11.0056545  | 11.104229   | 11.889132   | 11.341699   | 11.0994785  | 11.5003035  | 11.77591075 |
| "Gck"    | 2.2428082   | 2.28900135  | 3.47621265  | 2.8051654   | 2.91068625  | 2.4795462   | 3.22400575  | 2.831517    |
| "Gckr"   | 9.075522    | 9.553055    | 10.449274   | 10.52872    | 10.703945   | 10.165131   | 10.403517   | 10.501825   |
| "Gclc"   | 11.353031   | 10.74208475 | 11.9264825  | 11.1969085  | 10.011151   | 10.284582   | 11.18597175 | 11.0435385  |
| "Gclm"   | 11.395887   | 11.329068   | 12.031972   | 11.967206   | 11.8129425  | 11.468386   | 11.822761   | 12.10246    |
| "Gcm2"   | 2.42411505  | 2.39519755  | 2.3309454   | 2.34125745  | 2.42548895  | 2.4124165   | 2.41392655  | 2.4120135   |
| "Gcnt1"  | 2.7125695   | 2.7055743   | 2.575257    | 2.6323028   | 2.7300305   | 2.7513678   | 2.6826746   | 3.0140538   |
| "Gcnt2"  | 4.07272164  | 3.95425332  | 4.24085358  | 4.17546132  | 4.2476322   | 4.23916752  | 4.2495964   | 4.2463849   |
| "Gcnt3"  | 3.078712    | 3.0945773   | 2.8997378   | 3.0120182   | 3.1497347   | 3.1655192   | 3.0402973   | 3.153683    |
| "Gcsh"   | 11.027998   | 11.155763   | 11.262107   | 11.551719   | 11.31854    | 10.838087   | 11.854104   | 11.61335    |
| "Gda"    | 3.8224723   | 3.4462798   | 3.88833     | 4.1875196   | 3.805156    | 3.727111    | 4.191784    | 3.3341737   |
| "Gdap1"  | 2.575366    | 2.5523172   | 2.4951291   | 2.5142367   | 2.57260525  | 2.5883982   | 2.5663433   | 2.571553    |
| "Gdap10" | 6.753153    | 8.08958     | 8.107502    | 7.9336476   | 7.7463436   | 6.6138983   | 6.824822    | 8.305355    |
| "Gdap11" | 2.47681     | 2.4698036   | 2.3717098   | 2.405802    | 2.4766183   | 2.4907215   | 2.4577522   | 2.4659128   |
| "Gdap2"  | 7.882336    | 7.5223236   | 7.651502    | 7.2308674   | 7.722409    | 7.954859    | 7.3123527   | 7.1237073   |
| "Gde1"   | 11.710662   | 11.025749   | 9.451845    | 9.3985405   | 10.612852   | 10.806556   | 8.69549     | 9.686789    |
| "Gdf10"  | 5.8397794   | 4.7496495   | 4.618609    | 4.8781123   | 5.9067597   | 5.152286    | 4.688751    | 4.753547    |
| "Gdf15"  | 9.598607    | 8.9526005   | 7.131378    | 7.6949773   | 7.828058    | 9.193594    | 10.038881   | 7.904761    |
| "Gdf2"   | 7.1766763   | 5.8489375   | 6.909006    | 6.4986086   | 6.4655576   | 6.3821316   | 6.4987764   | 6.3629365   |
| "Gdf3"   | 2.128068    | 2.0922673   | 2.0432541   | 2.0759192   | 2.1129262   | 2.441902    | 2.0720325   | 2.0994556   |
| "Gdf5"   | 2.786168    | 2.7649064   | 2.7252812   | 2.6944199   | 2.7911623   | 2.7754436   | 2.728212    | 2.8227854   |
| "Gdi1"   | 7.1180034   | 6.9342375   | 7.1420293   | 7.262228    | 7.4787025   | 7.2669196   | 7.535678    | 7.482798    |
| "Gdi2"   | 11.72031433 | 11.80681517 | 11.39891767 | 11.52478883 | 11.70281987 | 11.69681617 | 11.6250584  | 11.69522983 |
| "Gdpd1"  | 5.25393615  | 3.87278045  | 3.88351215  | 3.77458525  | 4.0289055   | 4.706239    | 3.6129622   | 3.2581539   |
| "Gdpd2"  | 2.5261283   | 2.499021    | 2.4174757   | 2.3978188   | 2.6018016   | 2.6147275   | 2.4404972   | 2.5336099   |
| "Gdpd5"  | 3.9208407   | 4.0635605   | 3.854105    | 4.3446274   | 3.950693    | 3.9349647   | 3.1295562   | 3.9122665   |
| "Gem"    | 3.8891265   | 3.6036124   | 3.5536544   | 3.643119    | 4.6389785   | 4.0566707   | 3.9281762   | 3.1944532   |
| "Gemin6" | 5.559218    | 5.180919    | 5.869042    | 5.521147    | 5.5730553   | 5.855892    | 5.9039664   | 5.861638    |
| "Gemin7" | 6.5801435   | 6.27509     | 6.5004563   | 6.353324    | 5.9808197   | 6.388749    | 6.1102877   | 6.1145067   |
| "Gemin8" | 2.72487525  | 2.76722085  | 2.7132435   | 2.87012375  | 2.65018175  | 2.8549675   | 2.78410515  | 2.8678207   |
| "Get4"   | 6.72876285  | 7.6511875   | 6.9733212   | 6.981181    | 7.3691      | 7.02443885  | 7.0045162   | 7.2025416   |
| "Gfap"   | 2.7084842   | 2.6835387   | 2.625711    | 2.650344    | 2.6967115   | 2.6992912   | 2.701086    | 2.7117565   |
| "Gfer"   | 8.0450593   | 8.8103237   | 8.2838305   | 8.0398853   | 8.4663545   | 8.950681    | 8.3509378   | 8.235845    |
| "Gfi1"   | 2.5965385   | 2.6222463   | 2.4979348   | 2.5180378   | 2.6177425   | 2.6260042   | 2.571836    | 2.577108    |
| "Gfm1"   | 7.0476785   | 7.7305315   | 7.493851    | 7.1925887   | 7.52465815  | 6.9757146   | 7.5769935   | 7.36694     |
| "Gfm2"   | 5.477065    | 5.6147285   | 6.257948    | 6.9192843   | 6.29327     | 5.92347     | 6.4242806   | 6.441336    |
| "Gfod2"  | 3.354814    | 3.6583045   | 3.0794806   | 3.296557    | 4.133186    | 3.375227    | 3.3206902   | 3.3998494   |
| "Gfpt1"  | 2.4749408   | 2.4467144   | 2.3527687   | 2.398581    | 2.4723501   | 2.4687538   | 2.4536304   | 2.449287    |
| "Gfpt2"  | 2.2122335   | 2.365041    | 2.1683512   | 2.168721    | 2.2139974   | 2.2032213   | 2.2087681   | 2.1896856   |
| "Gfra1"  | 6.2902205   | 6.48085525  | 4.5118165   | 4.51943205  | 5.317223    | 6.0057112   | 4.16623915  | 4.6209082   |
| "Gfra2"  | 2.5115404   | 2.4993844   | 2.442039    | 2.4386644   | 2.5088181   | 2.5047865   | 2.4988275   | 2.4959564   |
| "Gga1"   | 3.9621644   | 3.9345517   | 3.9046497   | 3.9276836   | 3.9319062   | 4.0126204   | 3.956319    | 3.9456906   |
| "Gga2"   | 6.8426456   | 6.301       | 6.6038833   | 6.660783    | 6.7940836   | 6.6424274   | 6.6576567   | 6.532185    |
| "Ggct"   | 10.124647   | 10.2595     | 10.410251   | 10.017003   | 9.87522     | 10.22407    | 10.351972   | 9.260228    |
| "Ggcx"   | 5.4737005   | 5.5293217   | 6.6906595   | 6.787367    | 6.6123114   | 5.73405     | 7.271676    | 7.073374    |
| "Ggh"    | 8.546835    | 7.870581    | 7.923211    | 7.8332505   | 8.237939    | 7.777004    | 8.707784    | 8.048635    |
| "Ggnbp1" | 3.867264    | 3.8311806   | 3.7919917   | 3.812757    | 3.8548906   | 3.8409297   | 3.9099622   | 3.8489008   |
| "Ggnbp2" | 8.4115285   | 8.34355015  | 8.184432    | 8.225453    | 8.0800215   | 8.88711725  | 8.4305558   | 8.08457825  |
| "Ggps1"  | 4.730473975 | 4.605149475 | 4.28034305  | 4.265866375 | 4.069632025 | 4.163279975 | 4.3658808   | 4.259815475 |
| "Ggt5"   | 3.0459826   | 2.5661423   | 2.5325856   | 2.5593753   | 2.588323    | 2.588068    | 2.5718591   | 2.5867026   |
| "Ggta1"  | 3.3440936   | 3.271223    | 5.7058935   | 4.4880667   | 4.3549557   | 4.6127634   | 4.5465655   | 3.9105597   |
| "Gh"     | 2.794317467 | 2.780552333 | 2.643406933 | 2.698586667 | 2.8418892   | 2.828992867 | 2.759752667 | 2.832245333 |
| "Ghdc"   | 4.2590594   | 4.2579026   | 4.4941654   | 4.6735773   | 4.104774    | 4.682573    | 4.6815357   | 4.6948175   |
| "Ghitm"  | 10.288024   | 10.6037035  | 10.715065   | 10.9566105  | 10.718187   | 10.82888225 | 10.8183435  | 10.9056545  |
| "Ghr"    | 8.975751167 | 9.509799667 | 9.741469467 | 10.47418733 | 9.9270848   | 9.451047667 | 10.68053733 | 10.89949867 |
| "Ghrh"   | 2.3116107   | 2.2827606   | 2.2159996   | 2.384617    | 2.3025696   | 2.3035877   | 2.301685    | 2.2871225   |
| "Gif"    | 2.6920462   | 2.6864147   | 2.604045    | 2.62955     | 2.722598    | 2.7252707   | 2.6894035   | 2.693347    |
| "Gigyf1" | 6.2727976   | 6.459156    | 6.424873    | 6.43316     | 6.505945    | 6.5849743   | 6.479811    | 6.5290003   |
| "Gigyf2" | 6.279011    | 7.0238366   | 6.8338485   | 6.601707    | 7.536039    | 7.0252457   | 7.0096326   | 7.192882    |
| "Gimap1" | 4.259226    | 4.1089945   | 4.447539    | 4.2281046   | 4.490803    | 4.3163652   | 4.250449    | 4.244802    |
| "Gimap3" | 2.971768    | 2.9246743   | 2.9334767   | 2.9240904   | 3.001997    | 2.9473634   | 2.9618874   | 2.9428487   |
| "Gimap4" | 7.6998452   | 6.40789965  | 8.23457835  | 7.94990365  | 7.3044408   | 6.6955107   | 8.17023815  | 7.5803158   |
| "Gimap6" | 6.8621726   | 6.2610464   | 6.7300487   | 6.726745    | 6.635838    | 6.613658    | 6.623316    | 6.6571236   |
| "Gimap7" | 2.5186439   | 2.4850829   | 3.3856163   | 2.5918598   | 2.519742    | 2.5290895   | 2.6235795   | 2.5097284   |
| "Gins1"  | 4.9062953   | 5.594524    | 6.471706    | 6.47669     | 5.447869    | 4.991997    | 5.5559535   | 5.888135    |
| "Gins4"  | 6.571506    | 7.450524    | 6.930732    | 7.1690993   | 6.8398566   | 6.44512     | 6.9630084   | 7.2032437   |
| "Gipc1"  | 2.7244382   | 2.742687    | 3.182988    | 2.646571    | 2.6856093   | 2.6714773   | 2.7071471   | 2.7181807   |
| "Gipc2"  | 2.5831552   | 2.4469185   | 3.0941591   | 2.3871794   | 2.466324    | 2.4607446   | 2.4162233   | 2.4507778   |
| "Gitt1"  | 2.9887588   | 2.8466833   | 2.93298     | 3.0986595   | 2.9742298   | 2.9665804   | 2.9808266   | 2.9257364   |
| "Git2"   | 4.71913675  | 4.28603825  | 4.55853545  | 4.5505075   | 4.54887535  | 4.53140065  | 4.427141    | 4.2604864   |
| "Gja1"   | 6.89318406  | 6.62261382  | 6.3383312   | 6.55242954  | 7.01022212  | 6.80925182  | 7.04058512  | 6.45755644  |
| "Gja4"   | 8.155712    | 6.1753144   | 4.957781    | 5.289184    | 5.824357    | 5.1901264   | 5.010442    | 6.0834217   |
| "Gja5"   | 2.559657    | 2.5449684   | 2.500207    | 2.4876084   | 2.5668237   | 2.5540483   | 2.5473483   | 2.5572286   |
| "Gja8"   | 2.2641292   | 2.2275758   | 2.1916075   | 2.2040603   | 2.2513866   | 2.4075544   | 2.247508    | 2.2355394   |
| "Gjb1"   | 7.7493935   | 7.96523375  | 8.55878525  | 8.5049375   | 8.1734975   | 7.50288555  | 8.7576315   | 8.677087    |
| "Gjb2"   | 11.528021   | 10.65369    | 11.200659   | 11.711582   | 11.055585   | 11.14122    | 10.975761   | 11.479304   |

|            |             |             |             |             |             |             |             |             |
|------------|-------------|-------------|-------------|-------------|-------------|-------------|-------------|-------------|
| "Gjb3"     | 2.7578897   | 2.7275372   | 2.595119    | 2.6463952   | 2.7942557   | 2.7411952   | 2.7492602   | 2.7351403   |
| "Gjb6"     | 2.6934116   | 2.6793692   | 2.5875974   | 2.6224866   | 2.7040784   | 2.7024915   | 2.670384    | 2.726736    |
| "Gjc1"     | 2.6779685   | 3.0005927   | 2.560644    | 2.5583646   | 2.6386333   | 2.6305394   | 2.6447105   | 2.624967    |
| "Gjc2"     | 2.48600245  | 2.5824386   | 2.4329537   | 2.5406363   | 2.6398046   | 2.5700293   | 2.5289854   | 2.52935565  |
| "Gjd4"     | 2.4325755   | 2.3935695   | 2.338943    | 2.3671217   | 2.4138832   | 2.4079769   | 2.4193883   | 2.4015324   |
| "Gk2"      | 2.7816162   | 2.788212    | 2.7013474   | 2.7280736   | 2.7913408   | 2.7882345   | 2.7451167   | 2.7871842   |
| "Gkap1"    | 8.689486    | 9.088916    | 8.3161      | 8.662495    | 8.515379    | 8.775415    | 8.65859     | 8.734489    |
| "Gkn1"     | 2.3994669   | 2.39832865  | 2.30394065  | 2.3337816   | 2.42206255  | 2.4130626   | 2.36896515  | 2.3767853   |
| "Gla"      | 3.45060075  | 3.2960772   | 3.78124415  | 3.27172385  | 3.1529543   | 3.3365678   | 3.85481     | 3.3116382   |
| "Glb1"     | 6.22187     | 5.947907    | 6.308458    | 6.2023735   | 6.4872      | 5.982186    | 6.2193494   | 6.3593955   |
| "Glb1l"    | 2.6618641   | 2.66303635  | 2.614512    | 2.5864719   | 2.68337595  | 2.68936265  | 2.6680218   | 2.7917808   |
| "Glcci1"   | 3.7335288   | 3.8765545   | 3.7100723   | 3.60123035  | 4.26161305  | 3.82860115  | 3.80592085  | 3.94994485  |
| "Glce"     | 9.239017    | 9.134065    | 8.488058    | 8.671389    | 8.7322035   | 9.333025    | 8.707185    | 8.332357    |
| "Gldc"     | 9.2420845   | 9.990515    | 10.435123   | 9.417182    | 10.02833    | 9.898006    | 10.054365   | 8.73608     |
| "Gle1"     | 6.8078615   | 6.761196    | 6.23357985  | 6.56239135  | 6.5935055   | 6.193736    | 6.44472885  | 6.5845265   |
| "Glg1"     | 6.484593933 | 6.621816667 | 6.9336877   | 6.521598933 | 6.447489    | 6.422770833 | 6.231601267 | 6.418262667 |
| "Gli2"     | 2.5959463   | 2.57360935  | 2.50618755  | 2.5208531   | 2.59375515  | 2.58559835  | 2.5874481   | 2.58386325  |
| "Glipr1"   | 6.2316675   | 4.6325727   | 6.818967    | 5.378015    | 4.9555235   | 5.129328    | 4.909272    | 4.323386    |
| "Glipr1l2" | 2.4571812   | 2.4328809   | 2.3612905   | 2.3925657   | 2.4576802   | 2.4543772   | 2.4468951   | 2.4471664   |
| "Glipr2"   | 2.41677955  | 2.3811344   | 2.3828448   | 2.36604535  | 2.40145575  | 2.39280035  | 2.4043619   | 2.3898721   |
| "Glis2"    | 5.5925913   | 5.558578    | 5.52173     | 5.3022366   | 5.7005954   | 5.5709867   | 5.581602    | 5.5640907   |
| "Glmn"     | 4.19867     | 4.609775    | 4.445894    | 4.5132113   | 4.403175    | 4.555871    | 4.6860523   | 4.480197    |
| "Glo1"     | 11.11222367 | 11.26085783 | 11.77808933 | 11.675663   | 11.73813267 | 11.497123   | 12.24076633 | 12.30708183 |
| "Glod4"    | 8.653077    | 9.278432    | 9.234278    | 9.334644    | 9.3084345   | 9.175411    | 9.375016    | 9.39868     |
| "Glr1"     | 2.460652    | 2.443653    | 2.3591583   | 2.4206514   | 2.4991214   | 2.4501941   | 2.4481823   | 2.4441226   |
| "Glr3"     | 2.5392294   | 2.510343    | 2.4292896   | 2.4879398   | 2.5390234   | 2.5363626   | 2.524635    | 2.5241015   |
| "Glr4"     | 2.3561022   | 2.3295965   | 2.305192    | 2.3202255   | 2.3524907   | 2.3442488   | 2.3455417   | 2.3385043   |
| "Glrh"     | 3.312458    | 3.3593578   | 3.1152666   | 3.2002482   | 3.4338706   | 3.4398756   | 3.235515    | 3.4700575   |
| "Glrx"     | 8.865781    | 9.7033045   | 8.8475335   | 8.8805375   | 9.348073    | 9.255776    | 8.359064    | 8.3830202   |
| "Glrx2"    | 8.437799133 | 8.545690667 | 8.6036299   | 8.521706867 | 8.395895667 | 8.511715    | 8.539943    | 8.387673433 |
| "Glrx3"    | 9.7997115   | 9.430274    | 9.09653     | 9.4111755   | 9.353508    | 9.56748475  | 10.0171975  | 9.5788495   |
| "Glt25d1"  | 8.111972    | 7.49297215  | 8.0747815   | 7.73875175  | 7.45543615  | 7.59479285  | 7.274284    | 7.091642    |
| "Gltp"     | 8.411142    | 6.731805    | 8.793585    | 8.025973    | 7.549751    | 7.1695094   | 7.744027    | 7.542337    |
| "Gltpd1"   | 5.3363247   | 5.874067    | 6.1319904   | 5.8265963   | 6.133139    | 6.1029706   | 5.579581    | 5.7890744   |
| "Gltscr2"  | 6.988841367 | 7.0952724   | 6.513286933 | 6.559584167 | 7.101624267 | 6.990468967 | 6.3615105   | 6.607572233 |
| "Glud1"    | 12.763053   | 12.9765675  | 12.749674   | 12.70809675 | 12.816764   | 12.7382905  | 13.090572   | 12.9539515  |
| "Glul"     | 10.751      | 11.3596305  | 9.953022    | 10.8608535  | 11.8058095  | 10.5070485  | 11.2728935  | 11.2880175  |
| "Glyat"    | 9.113864833 | 9.319149    | 9.139370767 | 9.617032567 | 9.6917936   | 9.760512867 | 9.618743467 | 10.22490167 |
| "Glycam1"  | 2.806121    | 2.7752378   | 2.6592753   | 2.7245605   | 2.8681483   | 2.8367243   | 2.785526    | 2.8196795   |
| "Glyctk"   | 5.7720898   | 7.5203019   | 7.1617865   | 6.70266875  | 6.9750683   | 7.14691     | 6.944137    | 6.92130375  |
| "Glyr1"    | 9.597196    | 9.82455     | 9.543217    | 9.448603    | 9.848997    | 9.614038    | 9.564149    | 9.35648     |
| "Gm10015"  | 7.919725775 | 8.2650568   | 8.48855725  | 8.544692175 | 8.206535175 | 7.80262095  | 8.3529815   | 8.19002125  |
| "Gm10020"  | 13.248521   | 13.297694   | 13.085386   | 12.970949   | 13.054834   | 13.117162   | 12.799013   | 12.949998   |
| "Gm10045"  | 9.595219433 | 9.666217967 | 9.642229767 | 9.214214633 | 9.0585589   | 9.2411708   | 9.216425933 | 9.146284767 |
| "Gm10051"  | 13.525929   | 13.55627    | 13.349441   | 13.061206   | 13.0994     | 13.20955    | 12.799899   | 13.105277   |
| "Gm10052"  | 10.025661   | 9.434644    | 8.927477    | 9.039265    | 8.864574    | 9.653804    | 8.8923      | 9.114254    |
| "Gm10055"  | 3.099096    | 3.1024992   | 2.9582052   | 3.9548507   | 3.0930464   | 3.2460854   | 3.1974392   | 3.7989323   |
| "Gm10058"  | 3.30481875  | 3.2959911   | 3.1187488   | 3.1871128   | 3.4494275   | 3.3451196   | 3.17132805  | 3.3650764   |
| "Gm10063"  | 12.4202235  | 12.134202   | 12.4356665  | 11.9481885  | 11.73719125 | 12.027559   | 11.853217   | 12.0328095  |
| "Gm10071"  | 13.41328233 | 13.28564433 | 13.16936333 | 12.814519   | 12.99251333 | 13.11484833 | 12.80666233 | 12.94221867 |
| "Gm10094"  | 8.97526214  | 9.0988568   | 8.57071494  | 8.7431036   | 8.90763828  | 8.89304406  | 8.6980124   | 8.62973826  |
| "Gm10132"  | 11.485696   | 11.43771382 | 11.5467022  | 11.27555794 | 11.20691634 | 11.32623266 | 11.1606702  | 11.37657336 |
| "Gm10166"  | 14.142006   | 14.015038   | 13.86527083 | 13.79096783 | 13.67441267 | 13.80280033 | 13.58854933 | 13.75888667 |
| "Gm10177"  | 10.968954   | 11.396988   | 11.736977   | 11.346912   | 11.0813675  | 10.532915   | 11.247255   | 11.3043785  |
| "Gm10193"  | 7.8049575   | 8.14799785  | 8.041704925 | 8.30145165  | 7.9872352   | 7.990433375 | 8.126519625 | 8.174932625 |
| "Gm10224"  | 9.543651    | 9.953383    | 9.587065    | 9.837233    | 9.19728     | 9.047878    | 9.523456    | 9.5146265   |
| "Gm10228"  | 2.4106665   | 2.3708763   | 2.3086505   | 2.3368154   | 2.393372    | 2.39695     | 2.385488    | 2.3807683   |
| "Gm10256"  | 2.8443666   | 2.820738    | 2.7625318   | 2.7443976   | 2.920863    | 2.8376997   | 2.806367    | 2.9513605   |
| "Gm10257"  | 12.095892   | 12.014937   | 12.14955    | 12.049197   | 12.1685945  | 11.9337605  | 12.221928   | 12.035414   |
| "Gm10302"  | 2.8140717   | 2.8097475   | 2.5884295   | 2.8097572   | 2.9801724   | 2.8216562   | 2.7374997   | 2.8798273   |
| "Gm10334"  | 2.7494078   | 2.724825    | 2.6457338   | 2.6794791   | 2.7626834   | 2.7632532   | 2.7207017   | 2.7582865   |
| "Gm10340"  | 2.80166585  | 2.88595775  | 2.7845504   | 2.91835735  | 2.79992445  | 2.7899395   | 2.7405057   | 2.79093525  |
| "Gm10349"  | 7.359242667 | 7.566440667 | 7.612053133 | 7.440816067 | 7.369255967 | 7.630838767 | 7.501794067 | 7.4723205   |
| "Gm10374"  | 5.563737    | 6.6961927   | 5.529792    | 6.2490754   | 7.1858196   | 7.709389    | 6.645252    | 6.4452934   |
| "Gm10393"  | 6.653363    | 5.423918    | 7.293116    | 6.558509    | 6.173984    | 6.3694134   | 6.0678253   | 6.297057    |
| "Gm10420"  | 13.67481675 | 13.8513175  | 13.685227   | 13.6078705  | 13.49755    | 13.63234625 | 13.3500155  | 13.6207855  |
| "Gm10439"  | 2.5533152   | 2.5299556   | 2.4410887   | 2.5078359   | 2.5521939   | 2.5395827   | 2.537198    | 2.5368452   |
| "Gm10499"  | 2.8459926   | 2.8235908   | 2.7244492   | 2.7679      | 2.8421397   | 2.8435965   | 2.806991    | 2.896813    |
| "Gm10651"  | 9.970834    | 8.646942    | 8.958797    | 8.886324    | 8.580527    | 9.297545    | 8.820343    | 8.897676    |
| "Gm10693"  | 5.5762606   | 2.6390076   | 4.443245    | 3.0155947   | 2.6783595   | 2.8451495   | 3.0438094   | 2.6740675   |
| "Gm10817"  | 2.545268    | 2.5376468   | 2.4533625   | 2.486436    | 2.5326126   | 2.5234213   | 2.50203     | 2.5169969   |
| "Gm10913"  | 12.50334325 | 12.56755825 | 12.42181925 | 12.17594063 | 12.28644525 | 12.45188    | 11.94877288 | 12.24317488 |
| "Gm10921"  | 2.4747124   | 2.4598796   | 2.370559    | 2.4055243   | 2.4726994   | 2.4659371   | 2.4618726   | 2.4620137   |
| "Gm11362"  | 13.271301   | 13.507902   | 13.331713   | 13.216204   | 13.187433   | 13.344269   | 12.944827   | 13.2127285  |
| "Gm11425"  | 9.685243333 | 10.0707332  | 9.639667    | 9.2545868   | 9.278488333 | 9.729916233 | 9.1536415   | 9.568323867 |
| "Gm11478"  | 14.236972   | 14.146494   | 14.115935   | 13.852246   | 13.881925   | 14.076282   | 13.896947   | 13.942284   |
| "Gm11517"  | 5.0108304   | 4.369508    | 3.9872434   | 3.962362    | 4.0950155   | 3.869302    | 4.229937    | 4.104191    |
| "Gm11677"  | 3.6344216   | 3.8439178   | 3.4967856   | 3.5175915   | 3.7185311   | 3.6101046   | 3.6258094   | 3.5113783   |
| "Gm11694"  | 14.517482   | 14.355396   | 14.344193   | 14.310625   | 14.027586   | 14.174405   | 14.326465   | 14.30816    |
| "Gm11767"  | 2.5878084   | 2.554688    | 2.4907353   | 2.5227282   | 2.5863194   | 2.5748086   | 2.5631442   | 2.5804253   |
| "Gm11787"  | 8.87840875  | 7.769145    | 8.99062585  | 8.2423375   | 7.92623385  | 7.56716     | 7.8924575   | 7.8089725   |

|           |             |             |             |             |             |             |             |             |
|-----------|-------------|-------------|-------------|-------------|-------------|-------------|-------------|-------------|
| "Gm11793" | 10.1369235  | 9.8884355   | 9.897996    | 9.7288645   | 9.75521775  | 10.0333745  | 9.97116925  | 9.9476785   |
| "Gm11810" | 13.743597   | 13.565148   | 13.219961   | 13.23589    | 13.211897   | 13.457487   | 13.142835   | 13.328054   |
| "Gm12185" | 2.6198425   | 2.6206095   | 2.7616658   | 2.6744115   | 2.7630641   | 2.5934787   | 2.5356548   | 2.6288612   |
| "Gm12191" | 12.762848   | 12.820343   | 12.545403   | 12.322174   | 12.2676325  | 12.508533   | 12.345003   | 12.485258   |
| "Gm12264" | 2.9637275   | 3.1005893   | 2.8752377   | 2.9051857   | 3.0577872   | 3.1701212   | 3.2560968   | 3.4135082   |
| "Gm12372" | 10.142076   | 10.035293   | 9.6320715   | 9.693917    | 10.0888775  | 10.2311205  | 10.0717875  | 9.8966585   |
| "Gm12538" | 9.361117    | 9.848258    | 8.403527    | 9.078944    | 9.834289    | 9.783699    | 9.225556    | 8.890087    |
| "Gm12568" | 11.034469   | 11.399092   | 10.938339   | 11.157138   | 11.3802185  | 11.159588   | 11.279129   | 11.309466   |
| "Gm12597" | 2.5057898   | 2.40296615  | 2.32897     | 2.3516085   | 2.4975643   | 2.43782425  | 2.4204383   | 2.426143    |
| "Gm12606" | 2.380653    | 2.353045    | 2.287255    | 2.3204055   | 2.3762243   | 2.3716571   | 2.370045    | 2.3644197   |
| "Gm12657" | 12.87671367 | 11.780749   | 11.76728667 | 11.73736967 | 11.40112133 | 11.293587   | 11.39780867 | 11.27951467 |
| "Gm12693" | 9.307026    | 9.545067    | 9.3978      | 9.313984    | 9.298809    | 9.293725    | 9.138223    | 9.218754    |
| "Gm12816" | 7.9018203   | 8.3467615   | 8.09294675  | 7.8836691   | 8.075176    | 7.96544685  | 7.95246955  | 8.0603604   |
| "Gm12854" | 7.946049    | 6.309972    | 8.515031    | 6.780876    | 6.657289    | 6.15737     | 6.9104385   | 6.6827297   |
| "Gm12942" | 5.258284    | 5.2623744   | 5.5402555   | 5.692621    | 4.9362926   | 5.913748    | 5.24447     | 4.8625917   |
| "Gm12952" | 9.375294    | 9.256714    | 8.755215    | 8.471694    | 8.935566    | 9.011602    | 8.714062    | 8.782385    |
| "Gm13023" | 2.9951787   | 2.9943545   | 2.82797     | 2.893985    | 3.0371578   | 3.03551     | 2.9530349   | 3.0401814   |
| "Gm13102" | 2.9864616   | 2.9667823   | 2.890781    | 2.88522     | 3.0041306   | 3.0620472   | 2.9433122   | 2.9799755   |
| "Gm13152" | 3.1403027   | 3.1292481   | 2.9662046   | 3.0270023   | 3.2410622   | 3.2486012   | 3.0798547   | 3.2269142   |
| "Gm13271" | 2.5163305   | 2.4846807   | 2.4344573   | 2.4352891   | 2.508179    | 2.5117984   | 2.5064325   | 2.488473    |
| "Gm13305" | 7.249146    | 7.3742113   | 7.6705275   | 7.342804    | 6.9222383   | 7.4432855   | 7.6427145   | 7.383348    |
| "Gm13342" | 9.287621333 | 9.369366667 | 9.393764667 | 9.477619233 | 9.426558433 | 9.627243    | 9.7015621   | 9.457195333 |
| "Gm13363" | 13.334585   | 12.3488265  | 12.132229   | 12.636538   | 12.44424    | 12.52670425 | 12.144355   | 12.248586   |
| "Gm13369" | 11.13286    | 11.368427   | 11.291662   | 10.894117   | 11.346998   | 11.246246   | 11.611519   | 11.431213   |
| "Gm13430" | 12.242018   | 12.419202   | 12.44377    | 12.609702   | 12.436575   | 12.456318   | 12.795739   | 12.569341   |
| "Gm13502" | 11.941326   | 10.641231   | 12.515347   | 11.6903915  | 9.22931525  | 7.1686603   | 11.150962   | 11.8665685  |
| "Gm13777" | 14.103581   | 14.238891   | 14.2251835  | 14.223373   | 13.642239   | 13.961753   | 13.571338   | 13.860525   |
| "Gm13826" | 10.01882733 | 9.931190675 | 9.71964575  | 9.5536605   | 9.6037054   | 9.693997    | 9.6535386   | 9.611777075 |
| "Gm13889" | 2.9725144   | 2.9447436   | 2.979754    | 2.94732     | 2.9487572   | 2.521871    | 2.9556575   | 2.9457605   |
| "Gm13981" | 14.255894   | 14.231451   | 14.023539   | 13.880942   | 13.90499    | 13.976449   | 13.662219   | 13.88015    |
| "Gm14059" | 14.276219   | 14.048846   | 14.164688   | 13.766001   | 13.496926   | 13.665332   | 13.944772   | 13.762443   |
| "Gm14085" | 2.6412098   | 2.482386    | 2.908669    | 3.292478    | 2.3564339   | 2.446437    | 2.6296232   | 2.6129158   |
| "Gm14217" | 10.53845967 | 10.59917233 | 9.841502    | 9.869606867 | 10.24660633 | 10.39545867 | 9.850220667 | 9.938746667 |
| "Gm14277" | 7.2736573   | 6.6909246   | 7.332986    | 6.6454844   | 6.323525    | 6.5132093   | 6.936984    | 6.6982875   |
| "Gm14680" | 4.462010867 | 4.257931633 | 5.077833867 | 4.619960733 | 4.463754633 | 4.486588233 | 4.717498767 | 4.4705166   |
| "Gm14698" | 5.953526833 | 6.167950333 | 6.113096233 | 6.5266817   | 6.184939033 | 6.221241567 | 6.551115467 | 6.321836533 |
| "Gm14743" | 2.8247118   | 2.8042903   | 2.7064157   | 2.729929    | 2.8459225   | 2.821014    | 2.7918544   | 2.8338213   |
| "Gm15210" | 8.9274355   | 9.2366225   | 8.856696    | 8.815272    | 9.0612715   | 9.58952775  | 8.7074845   | 9.1055275   |
| "Gm15453" | 10.68619    | 11.369181   | 11.190506   | 10.297123   | 10.882571   | 10.672005   | 9.9843      | 10.274209   |
| "Gm15455" | 6.453552833 | 6.383195967 | 6.679790867 | 6.300280033 | 6.8942184   | 6.989156367 | 6.784185467 | 6.6354565   |
| "Gm15466" | 12.9874525  | 12.983946   | 13.320002   | 13.082115   | 13.180029   | 13.078967   | 13.1114855  | 13.09455    |
| "Gm15483" | 10.62154218 | 10.846253   | 10.544576   | 10.36811035 | 10.46375863 | 10.81223763 | 10.38311525 | 10.396886   |
| "Gm1549"  | 2.4871578   | 2.4571362   | 2.376143    | 2.4223132   | 2.479319    | 2.4742625   | 2.468266    | 2.4682078   |
| "Gm15501" | 13.10237683 | 13.196108   | 12.973008   | 12.69836367 | 12.88718133 | 13.135209   | 12.47795733 | 12.81063783 |
| "Gm15583" | 4.8540955   | 4.833096    | 5.04971     | 5.1346517   | 5.554055    | 5.149974    | 5.2861714   | 4.8864827   |
| "Gm16136" | 2.6454015   | 2.614536    | 2.5517282   | 2.5945237   | 2.637763    | 2.6380012   | 2.6354115   | 2.617252    |
| "Gm16340" | 5.764783933 | 4.7102275   | 6.2841921   | 6.1012374   | 5.5317432   | 5.325831233 | 6.238974367 | 5.431513433 |
| "Gm16489" | 2.7098973   | 2.7392898   | 2.654897    | 2.6898785   | 2.7362523   | 2.7345486   | 2.730937    | 2.7347715   |
| "Gm16515" | 5.324031    | 5.2829905   | 5.5200896   | 5.3741612   | 4.921939    | 5.57786     | 5.232401    | 5.128853    |
| "Gm16516" | 3.4535599   | 3.396332    | 3.3909414   | 3.406756    | 3.439032    | 3.4276485   | 3.4436586   | 3.4242966   |
| "Gm16517" | 5.8611736   | 6.2770166   | 5.4001193   | 5.4647713   | 4.8895197   | 5.407966    | 5.006867    | 5.246273    |
| "Gm16793" | 2.4583633   | 2.3490953   | 2.828709    | 2.328014    | 2.3745553   | 2.370434    | 2.3419113   | 2.7307944   |
| "Gm17066" | 4.787935867 | 4.8586208   | 4.788389167 | 4.841114667 | 4.752394333 | 4.758422367 | 4.77135     | 4.8651228   |
| "Gm17275" | 2.167314    | 2.0734694   | 2.4198716   | 2.187389    | 2.1024392   | 2.093631    | 2.096761    | 2.0578377   |
| "Gm17509" | 2.471171    | 2.4643574   | 2.379597    | 2.409366    | 2.463142    | 2.5266476   | 2.436541    | 2.4482498   |
| "Gm17546" | 2.3849046   | 2.3572068   | 2.3024435   | 2.3274      | 2.3822966   | 2.376885    | 2.3784857   | 2.3656726   |
| "Gm17748" | 4.806676    | 5.156655433 | 5.401835833 | 5.261380767 | 4.966341333 | 4.9856489   | 5.421988333 | 5.3805773   |
| "Gm1821"  | 13.86667733 | 13.81891833 | 13.742724   | 13.73655167 | 13.79429817 | 13.952479   | 13.65497233 | 13.748012   |
| "Gm19361" | 6.2845383   | 6.795943    | 6.241052    | 6.6212487   | 6.606135    | 6.8220143   | 6.596099    | 6.427112    |
| "Gm19420" | 11.90359    | 11.473054   | 12.030017   | 11.10105    | 11.598751   | 11.318287   | 11.656703   | 11.1815815  |
| "Gm19486" | 9.83012     | 9.700775    | 9.772352    | 9.918119    | 9.652635    | 9.295342    | 9.915115    | 9.757772    |
| "Gm19491" | 7.530549    | 7.5005403   | 7.2412195   | 7.3305264   | 7.823409    | 7.7309017   | 8.025264    | 7.8898177   |
| "Gm19496" | 8.013887    | 7.372542    | 8.327986    | 7.9681144   | 7.730152    | 7.668501    | 8.054832    | 7.7503195   |
| "Gm19531" | 2.690983    | 2.751447    | 2.5594392   | 2.633465    | 2.7868276   | 2.6959462   | 2.6638145   | 2.6828294   |
| "Gm19579" | 9.937276    | 9.620185    | 9.643782    | 9.708208    | 9.541557    | 9.874073    | 10.308898   | 9.737516    |
| "Gm19631" | 6.773913    | 6.6415086   | 5.708779    | 6.0438414   | 6.225627    | 6.0624905   | 6.0645294   | 6.119093    |
| "Gm1971"  | 2.4416566   | 2.4100447   | 2.3319402   | 2.3664732   | 2.4334621   | 2.429446    | 2.4256246   | 2.4225063   |
| "Gm1976"  | 2.4280286   | 2.4026344   | 2.3360286   | 2.367061    | 2.4243996   | 2.457037    | 2.4202085   | 2.419002    |
| "Gm19774" | 10.33833    | 10.49977    | 11.486569   | 11.025098   | 10.632583   | 10.190497   | 10.800309   | 10.797902   |
| "Gm19831" | 5.0929785   | 5.222693    | 5.0042834   | 5.011135    | 5.0734544   | 5.073297    | 5.0820603   | 5.066793    |
| "Gm19974" | 5.582819    | 5.3646293   | 4.3897285   | 4.483178    | 5.6941314   | 5.870731    | 4.4212465   | 4.7156806   |
| "Gm19980" | 3.3750973   | 3.243094    | 3.2974427   | 3.1739433   | 3.3050683   | 3.276155    | 3.2643793   | 3.4000273   |
| "Gm20274" | 3.4891717   | 3.678798    | 3.3024366   | 3.5125399   | 3.7650304   | 4.276929    | 3.5110714   | 4.200007    |
| "Gm20362" | 3.0740937   | 3.1141341   | 2.9982694   | 3.03131655  | 3.12781865  | 3.12615635  | 3.0827985   | 3.0946494   |
| "Gm20559" | 3.83672275  | 3.73267665  | 5.06121395  | 4.899697    | 3.6678323   | 3.45002325  | 4.6284305   | 4.0815912   |
| "Gm20605" | 2.7619377   | 2.71853675  | 2.7496835   | 2.7357168   | 2.73553215  | 2.7335184   | 2.7084565   | 2.738201    |
| "Gm2083"  | 14.332612   | 15.5154505  | 12.525356   | 15.6206255  | 15.58631    | 15.727659   | 15.379632   | 15.675224   |
| "Gm2382"  | 9.580196    | 9.143704    | 9.389661    | 9.422711    | 9.200618    | 9.364884    | 9.95473     | 9.610432    |
| "Gm2695"  | 3.1545267   | 3.4432197   | 3.2237859   | 3.2368212   | 3.2732196   | 3.2602944   | 3.2885077   | 3.2590756   |
| "Gm2710"  | 11.383732   | 11.786073   | 11.551754   | 11.638817   | 11.721439   | 11.564798   | 11.632625   | 11.9063835  |
| "Gm2a"    | 8.33020715  | 8.69666085  | 8.4993525   | 9.14722215  | 9.3855495   | 8.63064     | 9.0906062   | 9.1087089   |

|          |             |             |             |             |             |             |             |             |
|----------|-------------|-------------|-------------|-------------|-------------|-------------|-------------|-------------|
| "Gm3244" | 10.860527   | 11.4410685  | 11.341983   | 11.435679   | 11.4669425  | 11.3735165  | 11.637876   | 11.6258305  |
| "Gm3258" | 9.488122    | 9.232146    | 8.956772    | 9.143501    | 8.934645    | 9.184324    | 8.818492    | 9.049114    |
| "Gm3417" | 3.1042583   | 3.514112    | 2.902087    | 3.00691435  | 3.5566858   | 3.20667815  | 2.99388515  | 3.1581461   |
| "Gm3470" | 6.768029    | 7.889111    | 7.021216    | 7.7697244   | 7.8765235   | 7.5370145   | 7.7916245   | 8.02039     |
| "Gm3579" | 7.89925425  | 7.7705762   | 5.71661275  | 6.7103476   | 7.68916485  | 7.20758415  | 6.5929801   | 7.010737    |
| "Gm3650" | 5.5715775   | 5.8688555   | 6.868943    | 6.712394    | 6.3250623   | 6.110266    | 6.8306494   | 6.69109     |
| "Gm3776" | 10.22955    | 10.359388   | 12.4243965  | 11.72398    | 7.0678983   | 6.681057    | 8.375089    | 7.5524373   |
| "Gm3837" | 10.629432   | 11.070141   | 10.427475   | 10.659759   | 10.462055   | 10.832166   | 10.79154    | 10.682811   |
| "Gm4024" | 10.23017925 | 9.94724725  | 10.276523   | 10.01930625 | 10.19786375 | 9.9704505   | 10.59976775 | 10.06202425 |
| "Gm4354" | 11.7468705  | 11.30207475 | 11.362549   | 11.314611   | 11.3276775  | 11.579681   | 10.8764955  | 10.7445095  |
| "Gm4604" | 12.934143   | 12.91317867 | 12.66774717 | 12.35678633 | 12.32623467 | 12.64611633 | 12.15175733 | 12.32543767 |
| "Gm4705" | 12.916596   | 12.8769605  | 12.55774375 | 12.4214605  | 12.492343   | 12.6371945  | 12.2045615  | 12.354657   |
| "Gm4736" | 3.464824    | 3.4672644   | 3.335578    | 3.483988    | 3.6340392   | 3.4797924   | 3.4088826   | 3.4701517   |
| "Gm4788" | 3.2412758   | 3.1877255   | 3.0120115   | 3.1848903   | 3.2100396   | 3.4251988   | 3.2526102   | 3.4626591   |
| "Gm4802" | 2.6161268   | 2.575857    | 2.5735314   | 2.5249522   | 2.6006098   | 2.5927324   | 2.6063402   | 2.5899906   |
| "Gm4887" | 6.281390333 | 6.599725233 | 6.426054433 | 6.101148667 | 6.4178279   | 6.000561967 | 6.118335667 | 6.146250767 |
| "Gm4943" | 9.720578    | 10.296851   | 10.344751   | 10.320573   | 10.229527   | 10.224697   | 10.387827   | 10.376761   |
| "Gm5093" | 2.686352    | 2.6482198   | 2.6466167   | 2.6397717   | 2.9876454   | 2.6802826   | 2.6876493   | 2.6656182   |
| "Gm5161" | 5.84064     | 6.232821    | 6.951198    | 6.3762407   | 6.023325    | 5.9299006   | 6.1449437   | 6.014564    |
| "Gm5526" | 11.5033715  | 11.525802   | 11.91468475 | 11.775105   | 11.5697615  | 11.5757225  | 11.654395   | 11.642561   |
| "Gm5553" | 8.4084      | 8.474086    | 8.993943    | 9.203976    | 8.542099    | 8.875312    | 9.039515    | 9.078554    |
| "Gm5595" | 3.5990457   | 3.6072664   | 3.8671303   | 3.5101501   | 3.630537    | 3.60500075  | 3.70337745  | 3.74392515  |
| "Gm561"  | 9.066044    | 9.4572115   | 8.883726    | 8.9301405   | 9.182905    | 9.476931    | 9.172134    | 8.904613    |
| "Gm5616" | 8.9237625   | 9.205514    | 9.0415705   | 8.89459225  | 8.963576    | 9.1072625   | 8.8289625   | 8.8456795   |
| "Gm5617" | 6.0858674   | 7.60085     | 6.968799    | 7.1949105   | 7.488851    | 6.997301    | 7.4996686   | 7.2477636   |
| "Gm5620" | 7.627407667 | 7.715982833 | 8.5819782   | 7.631336667 | 7.494006233 | 6.960135433 | 7.4782401   | 7.503539233 |
| "Gm5621" | 14.152878   | 14.190334   | 13.992751   | 13.89501    | 14.110069   | 14.0843335  | 13.8894505  | 13.95762725 |
| "Gm5633" | 6.643815    | 7.3950915   | 6.979826    | 6.497628    | 7.137496    | 7.008104    | 6.2087135   | 6.616621    |
| "Gm568"  | 2.7147894   | 2.685542    | 2.6200352   | 2.6545134   | 2.7096426   | 2.7049816   | 2.6907206   | 2.701333    |
| "Gm5806" | 7.431424067 | 7.480864433 | 6.669589167 | 7.092291233 | 7.202193    | 7.2897921   | 7.0461071   | 7.379369    |
| "Gm5963" | 11.7425215  | 11.5200998  | 11.40744995 | 11.14593025 | 11.15228835 | 11.27047875 | 11.3920479  | 11.41524378 |
| "Gm6109" | 3.2958717   | 3.88761285  | 3.0881156   | 3.22752115  | 3.5064426   | 3.59229495  | 3.2782346   | 3.5007559   |
| "Gm6115" | 10.66771875 | 11.2023165  | 10.939087   | 11.092812   | 11.086395   | 10.9184605  | 11.0449685  | 11.2209815  |
| "Gm6211" | 2.816071    | 2.7891874   | 2.675469    | 2.7235174   | 2.8230329   | 2.8070893   | 2.7990346   | 2.8201456   |
| "Gm6238" | 11.212464   | 11.765309   | 11.263846   | 11.211984   | 11.139513   | 11.285862   | 11.147169   | 11.35102    |
| "Gm6293" | 9.613057    | 9.878845    | 9.154389833 | 9.452743333 | 9.478266    | 9.966477667 | 9.431559    | 9.595511667 |
| "Gm6334" | 8.33692065  | 8.31585265  | 8.12275165  | 7.8670765   | 8.047692    | 8.2808972   | 7.9889045   | 7.762285    |
| "Gm6402" | 10.725259   | 10.737214   | 10.675375   | 10.466359   | 10.533471   | 10.531503   | 10.380128   | 10.501732   |
| "Gm6415" | 10.863034   | 11.541231   | 11.286616   | 11.422882   | 11.41049    | 11.291031   | 11.460741   | 11.504677   |
| "Gm6484" | 6.5233936   | 5.7086983   | 7.6451516   | 6.949773    | 6.9361963   | 5.8396473   | 9.577872    | 8.546087    |
| "Gm6594" | 9.744641    | 9.791002    | 10.015618   | 9.856293    | 9.365168    | 8.77803     | 10.30364    | 9.897057    |
| "Gm6607" | 3.8817768   | 3.6695294   | 3.6342165   | 3.5027263   | 3.7818203   | 3.6830387   | 3.4525046   | 3.6832354   |
| "Gm6682" | 2.390588    | 2.3663259   | 2.2938187   | 2.326773    | 2.3960102   | 2.3922281   | 2.3835686   | 2.393901    |
| "Gm6747" | 9.606435333 | 9.575409667 | 9.683626    | 9.798238333 | 9.484557167 | 9.455151    | 9.543243    | 9.646139333 |
| "Gm6787" | 2.5344455   | 2.6785407   | 2.4646125   | 2.469337    | 2.5089226   | 2.5267963   | 2.8004558   | 2.5073633   |
| "Gm6793" | 10.332005   | 10.36384    | 10.640584   | 10.022541   | 10.380573   | 10.22279    | 10.4644165  | 10.601243   |
| "Gm6988" | 12.959879   | 13.186178   | 12.698927   | 12.667304   | 12.680013   | 12.895163   | 12.637664   | 12.71407    |
| "Gm7040" | 2.5064423   | 2.522047    | 2.4020336   | 2.4487154   | 2.552027    | 2.5179205   | 2.5021589   | 2.5501845   |
| "Gm7120" | 5.8837378   | 6.09710615  | 5.39951375  | 4.86127325  | 5.3554235   | 5.570474    | 4.88382025  | 5.09467985  |
| "Gm7226" | 8.2708128   | 8.493713    | 8.247839533 | 8.487969867 | 8.202385167 | 8.012321833 | 8.457879333 | 8.367269333 |
| "Gm7285" | 12.819273   | 12.863905   | 12.818391   | 12.360047   | 12.418175   | 12.59434    | 12.000125   | 12.195331   |
| "Gm7511" | 7.181857    | 8.200965    | 7.539168    | 7.653656    | 7.2071185   | 7.8772087   | 7.3004584   | 7.702096    |
| "Gm7846" | 8.07838     | 7.8217144   | 7.8279085   | 7.770281    | 7.4610534   | 7.451766    | 8.330403    | 7.7480745   |
| "Gm8069" | 8.832756    | 9.068551    | 9.128761    | 8.890416    | 9.001364    | 8.849776    | 8.407739    | 8.685277    |
| "Gm8096" | 2.853949    | 2.824377    | 2.694232    | 2.7887955   | 2.8458571   | 2.8670058   | 2.8360667   | 2.8369427   |
| "Gm8203" | 10.127973   | 9.7373475   | 10.0036095  | 9.84411075  | 10.0888805  | 10.0998375  | 10.5637005  | 10.11098    |
| "Gm8430" | 13.916583   | 13.876603   | 13.661054   | 13.4564085  | 13.613855   | 13.823491   | 13.512469   | 13.601946   |
| "Gm8465" | 5.6955733   | 6.470578    | 5.6039977   | 5.871439    | 6.723699    | 6.571429    | 6.7169704   | 6.5168476   |
| "Gm8479" | 2.533411    | 2.5033455   | 2.4364266   | 2.4835982   | 2.5262532   | 2.5175786   | 2.5231364   | 2.519073    |
| "Gm8539" | 5.184200333 | 5.333362767 | 5.247906167 | 5.1211618   | 5.1465704   | 5.177691033 | 5.100257333 | 5.379751267 |
| "Gm8615" | 8.215437    | 8.085595    | 8.964201    | 9.291134    | 8.922651    | 9.309759    | 9.289457    | 8.781206    |
| "Gm8801" | 5.1258781   | 6.5353969   | 6.1807762   | 6.120002    | 6.8239063   | 6.0221893   | 5.53778615  | 6.7977465   |
| "Gm8942" | 13.640921   | 13.229634   | 13.516158   | 13.12982    | 12.866205   | 13.001726   | 13.009166   | 12.984978   |
| "Gm9222" | 5.0580654   | 5.7016      | 5.126128    | 5.6995354   | 5.6573334   | 5.403988    | 5.269699    | 5.3486776   |
| "Gm9706" | 6.17110435  | 5.95965535  | 8.41230785  | 7.35971235  | 5.62950325  | 5.8805143   | 6.4013669   | 6.168076    |
| "Gm9748" | 2.6086016   | 2.5686388   | 2.4754615   | 2.5431104   | 2.5987349   | 2.5973432   | 2.5773702   | 2.5930858   |
| "Gm9769" | 11.7313355  | 11.35057    | 11.488737   | 11.439956   | 11.5238135  | 11.69954    | 11.615984   | 11.691293   |
| "Gm98"   | 6.5820003   | 7.4137144   | 7.0312605   | 7.0411553   | 7.1166763   | 7.484149    | 7.0694356   | 7.377771    |
| "Gm9817" | 2.3777134   | 2.356563    | 2.2797275   | 2.324193    | 2.3728194   | 2.5556014   | 2.3656383   | 2.390028    |
| "Gm9835" | 6.93339255  | 5.9448275   | 7.320611    | 6.67034135  | 6.58759595  | 6.4038873   | 6.8406415   | 6.38609455  |
| "Gm9840" | 7.737536375 | 7.826392675 | 7.761326025 | 7.8795186   | 7.79000495  | 7.8743803   | 7.8276805   | 7.7491747   |
| "Gm9846" | 13.260294   | 13.438896   | 12.714243   | 12.620477   | 13.092662   | 13.29162    | 12.530549   | 12.851887   |
| "Gm9861" | 2.88903     | 2.8498087   | 2.9598358   | 2.8411891   | 2.870944    | 2.8645725   | 2.82118     | 2.8747904   |
| "Gm9923" | 6.55353945  | 6.47188585  | 6.146916    | 6.28821495  | 6.68036725  | 6.87775575  | 6.542116    | 6.694641    |
| "Gm9983" | 5.0424924   | 5.5569634   | 5.3882155   | 5.214555    | 5.9779544   | 6.34141     | 5.8104634   | 5.629144    |
| "Gmcl1"  | 4.534126325 | 4.614402125 | 4.79773915  | 4.67707645  | 4.407103725 | 4.764215375 | 4.64731105  | 4.6619753   |
| "Gmeb1"  | 5.650261    | 5.5928984   | 5.5735393   | 5.6438923   | 5.662678    | 5.5956106   | 5.6894407   | 5.5496716   |
| "Gmfb"   | 6.849200625 | 6.95223755  | 6.835745275 | 7.097482975 | 7.018579375 | 7.20847825  | 7.020158175 | 7.2865392   |
| "Gmip"   | 3.925389    | 3.8090134   | 5.0811405   | 4.763746    | 3.8897023   | 3.7824254   | 3.9308767   | 3.4552476   |
| "Gmnn"   | 7.030192    | 7.8387833   | 7.4466376   | 7.867306    | 7.896385    | 7.916746    | 7.6138844   | 8.385573    |
| "Gmppa"  | 4.71889992  | 5.42046622  | 4.83155408  | 4.97793212  | 5.759101    | 4.7736722   | 4.96692768  | 5.12312622  |

|            |             |             |             |             |             |             |             |             |
|------------|-------------|-------------|-------------|-------------|-------------|-------------|-------------|-------------|
| "Gmppb"    | 6.676712    | 7.2541437   | 7.3858      | 6.588796    | 7.842725    | 6.6000304   | 6.388175    | 6.7579536   |
| "Gmpr"     | 2.4650743   | 2.2698185   | 3.0488179   | 2.4180279   | 2.2184703   | 2.209679    | 2.4993758   | 2.364923    |
| "Gmpr2"    | 6.7751017   | 5.9974008   | 7.5301495   | 7.3131614   | 7.25207     | 6.8589916   | 7.680019    | 7.36889     |
| "Gna11"    | 7.68725365  | 8.3930475   | 8.02126535  | 8.3015205   | 8.19871875  | 8.1887075   | 8.1584805   | 8.20519875  |
| "Gna12"    | 3.443846025 | 3.87079565  | 3.214430725 | 3.64613945  | 4.031925475 | 3.773150475 | 3.6833138   | 4.0238878   |
| "Gna13"    | 7.0978656   | 6.772720017 | 6.349088917 | 6.350861233 | 6.5786079   | 6.623976933 | 6.268196467 | 6.1244435   |
| "Gna14"    | 2.72784685  | 2.80295935  | 2.63621685  | 2.79795375  | 3.18499485  | 2.7040634   | 3.4854875   | 3.4573244   |
| "Gna15"    | 2.3606384   | 2.3201756   | 2.3109164   | 2.3085132   | 2.3432589   | 2.3357909   | 2.346164    | 2.3293576   |
| "Gnai1"    | 3.619578567 | 4.281013467 | 3.1380239   | 3.101311867 | 3.6948042   | 3.801287267 | 3.062175467 | 2.8659884   |
| "Gnai2"    | 8.98877025  | 8.3923795   | 9.5584065   | 9.192642    | 8.7679665   | 8.483899    | 9.213977    | 8.882885    |
| "Gnai3"    | 8.21942715  | 7.863433    | 7.9447756   | 8.0414825   | 8.1875935   | 8.232619    | 8.6336755   | 8.3931722   |
| "Gnao1"    | 2.44106075  | 2.4099047   | 2.3439505   | 2.3901665   | 2.4389388   | 2.4309816   | 2.4232376   | 2.4475687   |
| "Gnas"     | 4.987713    | 5.0199555   | 4.9756341   | 4.997203575 | 5.069656225 | 4.981237475 | 5.040411225 | 5.02271955  |
| "Gnat1"    | 3.8691783   | 3.558136    | 4.637843    | 3.4992967   | 4.1420436   | 2.951887    | 3.3578846   | 3.2025578   |
| "Gnat2"    | 2.4013622   | 2.3584058   | 2.2634091   | 2.3200092   | 2.3925543   | 2.3844862   | 2.8034039   | 2.5694022   |
| "Gnb1"     | 6.191957167 | 5.975731767 | 6.279655133 | 6.1053473   | 5.951161067 | 5.850139833 | 6.175980333 | 6.047694033 |
| "Gnb11"    | 2.1717913   | 2.3851042   | 2.2858047   | 2.2583015   | 2.3124442   | 2.3410096   | 2.3075535   | 2.305349    |
| "Gnb2"     | 9.978088    | 9.612926    | 10.181763   | 9.897203    | 9.863462    | 9.861105    | 9.837229    | 9.967133    |
| "Gnb2l1"   | 12.522574   | 12.535163   | 12.501557   | 12.098757   | 12.211245   | 12.4913225  | 11.789553   | 12.181656   |
| "Gnb3"     | 2.652342    | 2.6180692   | 2.6030502   | 2.5747895   | 2.64504     | 2.651015    | 2.6267695   | 2.647572    |
| "Gnb4"     | 3.44922385  | 3.3804358   | 3.77453815  | 3.42713285  | 3.15784515  | 3.1137923   | 3.71818735  | 3.27919485  |
| "Gnb5"     | 2.6348116   | 2.6177404   | 2.6046648   | 2.6276429   | 2.6446755   | 2.6379344   | 2.6521862   | 2.6330712   |
| "Gne"      | 9.404142    | 9.7215      | 9.672623    | 9.785052    | 9.726149    | 10.098617   | 9.564034    | 10.33425    |
| "Gng10"    | 8.27995     | 7.8954873   | 8.479557    | 8.307581    | 7.8383193   | 7.2913175   | 8.47924     | 8.027146    |
| "Gng11"    | 8.01901     | 7.1284704   | 8.426712    | 8.159994    | 7.4877834   | 7.371157    | 8.450321    | 7.819577    |
| "Gng12"    | 8.57284825  | 8.183044    | 9.42465     | 8.66622825  | 8.2749835   | 8.00802035  | 8.322465    | 9.095701    |
| "Gng13"    | 2.2311144   | 2.20758     | 2.1333904   | 2.177669    | 2.221527    | 2.4262996   | 2.2150097   | 2.2312303   |
| "Gng2"     | 3.2262852   | 3.1570947   | 3.8534732   | 3.1696558   | 3.2030072   | 3.2047644   | 3.2141044   | 3.1952116   |
| "Gng4"     | 2.4278347   | 2.3995569   | 2.3260825   | 2.3578637   | 2.4240499   | 2.4240673   | 2.4159365   | 2.41267     |
| "Gngt1"    | 2.99296375  | 2.795221925 | 2.759463825 | 2.957704775 | 2.942239525 | 2.918110475 | 2.909770925 | 2.922622275 |
| "Gnl1"     | 4.54016115  | 4.08825235  | 3.71054615  | 3.90849945  | 3.96204395  | 3.72604205  | 3.806965    | 3.7754695   |
| "Gnl2"     | 7.632914    | 7.886996067 | 6.880236    | 6.808542667 | 7.403247333 | 7.7606278   | 7.0712659   | 7.154016133 |
| "Gnl3"     | 10.203715   | 9.4405575   | 8.707291    | 8.913369    | 9.681046    | 9.920895    | 8.581193    | 9.689295    |
| "Gnmt"     | 13.737859   | 14.396996   | 13.718225   | 14.298336   | 14.182096   | 14.1226635  | 13.541206   | 14.091983   |
| "Gnpat"    | 7.199184    | 7.836523    | 7.7658944   | 7.582079    | 7.7739625   | 7.6081305   | 8.085109    | 7.8830276   |
| "Gnpda1"   | 4.2076855   | 4.607762    | 5.171853    | 5.988289    | 5.221759    | 5.3078575   | 5.234562    | 5.208356    |
| "Gnpda2"   | 3.94494525  | 4.0562865   | 5.25510025  | 5.0497835   | 4.3531963   | 4.2751465   | 5.04656315  | 4.5548092   |
| "Gnpnat1"  | 9.3991885   | 9.348049    | 9.561890667 | 9.786888667 | 8.980047333 | 9.421375    | 9.435626167 | 9.400703    |
| "Gnptab"   | 3.7548156   | 3.430077467 | 3.639314    | 3.656083433 | 3.696571767 | 3.4482102   | 3.988866867 | 3.6088567   |
| "Gnrhr"    | 2.5048508   | 2.48133045  | 2.42313345  | 2.4657291   | 2.5041853   | 2.52166925  | 2.4915109   | 2.4967235   |
| "Gns"      | 11.8096675  | 11.710574   | 11.709705   | 11.8656825  | 11.66389    | 11.701976   | 11.649235   | 11.4810705  |
| "Golga2"   | 7.7233286   | 7.867572    | 7.529895    | 7.470019    | 7.6239634   | 7.7412567   | 7.661866    | 7.4191265   |
| "Golga3"   | 4.51851595  | 4.4554431   | 4.37246315  | 4.4683281   | 4.5195284   | 4.5448738   | 4.39370585  | 4.54948235  |
| "Golga4"   | 8.1414982   | 8.0860432   | 7.6967033   | 7.721655    | 8.010792333 | 8.090183233 | 7.8090259   | 7.730792667 |
| "Golga5"   | 9.276924    | 9.640413    | 8.65207     | 8.804285    | 9.179171    | 9.3758135   | 8.582526    | 8.763581    |
| "Golga7"   | 10.488946   | 10.37639    | 10.473542   | 10.670803   | 10.4933605  | 10.338455   | 10.680313   | 10.410747   |
| "Golim4"   | 9.749132    | 9.543396    | 9.786715    | 9.692942    | 9.902451    | 9.677882    | 9.61828     | 9.721262    |
| "Golm1"    | 5.7455983   | 3.85439     | 6.6925306   | 4.902887    | 5.2562585   | 4.879052    | 5.306995    | 4.822698    |
| "Golp3"    | 7.911797175 | 6.942075875 | 6.567853325 | 6.6348265   | 6.835661075 | 7.056601725 | 6.643485425 | 6.80075065  |
| "Golp3l1"  | 4.9617057   | 5.0074463   | 5.376194    | 4.874278    | 5.0689754   | 5.0410204   | 5.076844    | 5.066699    |
| "Golt1a"   | 7.2505774   | 7.733238    | 6.890961    | 7.0520177   | 7.1266956   | 7.5203004   | 6.9778686   | 6.6631064   |
| "Golt1b"   | 3.04453195  | 2.97380695  | 3.2276976   | 3.0120057   | 3.04198805  | 2.94029785  | 2.9937017   | 2.9371684   |
| "Gon4l"    | 4.592216    | 4.5519056   | 4.6117706   | 4.545232    | 4.5707693   | 4.5786155   | 4.407798    | 4.5283303   |
| "Gopc"     | 5.7356595   | 6.2832885   | 5.7277768   | 5.4843252   | 5.79110335  | 5.6341218   | 5.711416    | 5.8982495   |
| "Goraspl1" | 3.7391093   | 4.14533725  | 4.1645978   | 4.2231023   | 4.3587017   | 4.0892882   | 4.14527645  | 4.4419414   |
| "Goraspl2" | 6.7309117   | 7.302982    | 6.65574235  | 6.4834352   | 7.0517745   | 6.96862775  | 6.348522    | 6.685059    |
| "Gosr1"    | 7.25513785  | 7.38581     | 6.5683737   | 6.6784635   | 6.79783285  | 6.49957925  | 6.4350313   | 6.6125095   |
| "Gosr2"    | 6.87465375  | 8.092356    | 7.3027622   | 7.08066     | 7.50488125  | 7.1064612   | 6.420768    | 6.8420135   |
| "Got1"     | 13.577866   | 12.969758   | 11.334486   | 11.108963   | 11.763216   | 12.983498   | 10.159512   | 10.060902   |
| "Got2"     | 8.588405    | 9.986744    | 10.02266725 | 9.8243395   | 10.221959   | 9.6608633   | 9.9196455   | 9.9312975   |
| "Gp1bb"    | 2.668187    | 2.5952206   | 2.5347974   | 2.4963174   | 2.5918505   | 2.5867813   | 2.5960503   | 2.5811586   |
| "Gp49a"    | 10.482633   | 8.188744    | 10.090521   | 9.346261    | 9.123281    | 8.421149    | 8.701402    | 8.830077    |
| "Gpa33"    | 2.5077312   | 2.4380052   | 2.3866272   | 2.6788247   | 2.4209552   | 2.4641554   | 2.2973864   | 2.526086    |
| "Gpaa1"    | 3.799432233 | 3.818259233 | 3.908506967 | 3.7942464   | 3.9586336   | 3.8308937   | 3.8140215   | 3.824145433 |
| "Gpam"     | 7.19575375  | 7.4849752   | 7.2955161   | 7.22768     | 7.3562204   | 7.4979241   | 7.34019175  | 7.44826545  |
| "Gpank1"   | 3.63798115  | 3.5100367   | 3.3433867   | 3.52523005  | 3.57068525  | 3.7558377   | 3.4629724   | 3.69991265  |
| "Gpatch1"  | 7.8328223   | 7.1690617   | 7.5620375   | 7.370573    | 7.14434     | 7.425111    | 7.216872    | 7.210354    |
| "Gpatch2"  | 2.8484976   | 2.8183846   | 2.7667956   | 2.6328716   | 3.3710773   | 2.9446552   | 2.7636142   | 2.9266918   |
| "Gpatch4"  | 5.896094433 | 6.1821742   | 5.772133467 | 5.259005033 | 5.984169933 | 6.172537067 | 5.300638133 | 5.3205001   |
| "Gpatch8"  | 4.5454654   | 4.913650667 | 4.8787804   | 5.058013    | 5.0152923   | 4.871387033 | 5.1632304   | 5.1058235   |
| "Gbbp1"    | 10.080297   | 9.648036    | 9.640692    | 9.664464    | 9.536302    | 9.29674     | 9.469106    | 9.687487    |
| "Gbbp1l1"  | 7.498974    | 7.6219716   | 7.1282005   | 7.6937594   | 7.848573    | 7.880398    | 7.6558976   | 7.7629538   |
| "Gpc1"     | 4.178988    | 6.293153    | 5.790599    | 5.551859    | 6.382477    | 6.559561    | 6.3057213   | 4.2012167   |
| "Gpc3"     | 2.3529515   | 2.305835    | 3.2078083   | 2.30631     | 2.3345723   | 2.3257055   | 2.3357503   | 2.310717    |
| "Gpc4"     | 8.472976    | 9.382112    | 9.57156     | 9.335123    | 8.927054    | 9.318856    | 8.914217    | 9.049384    |
| "Gpc6"     | 2.635685    | 2.6096487   | 2.593215    | 2.5969672   | 2.6658664   | 2.6329489   | 2.6218343   | 2.626132    |
| "Gpcpd1"   | 13.430181   | 13.88093    | 12.119976   | 12.953568   | 13.463893   | 13.371028   | 12.204359   | 12.864278   |
| "Gpd1"     | 4.504610133 | 7.1676246   | 5.8031315   | 6.310296533 | 7.316874833 | 6.336677    | 6.389617733 | 6.677266733 |
| "Gpd2"     | 6.60339     | 8.508226    | 7.827083    | 8.257811    | 9.890944    | 8.606985    | 9.161177    | 9.244465    |
| "Gphn"     | 8.0973161   | 7.9195399   | 8.1403465   | 8.917982    | 8.275617    | 8.5214938   | 8.61129375  | 9.0293875   |
| "Gpi1"     | 9.294089333 | 9.738319667 | 9.74169     | 9.7326105   | 10.85139533 | 9.53054     | 9.489753333 | 9.935070333 |

|              |             |             |             |             |             |             |             |             |
|--------------|-------------|-------------|-------------|-------------|-------------|-------------|-------------|-------------|
| "Gpld1"      | 10.025465   | 10.549028   | 10.442365   | 10.914069   | 10.597658   | 10.061554   | 9.920107    | 10.354621   |
| "Gpm6a"      | 5.3807825   | 4.46654155  | 5.9524894   | 5.138159    | 4.7488457   | 3.981564    | 5.02364065  | 4.6672445   |
| "Gpm6b"      | 2.83392635  | 2.6704622   | 3.2474289   | 2.7677729   | 2.837778    | 2.7552391   | 2.889276    | 2.83081765  |
| "Gpn1"       | 7.7885714   | 7.6967726   | 7.790924    | 7.2127647   | 7.312586    | 7.641057    | 7.457921    | 7.5798492   |
| "Gpn2"       | 6.361286    | 6.532806    | 5.719507    | 6.1737556   | 6.2155232   | 6.191294    | 6.2614503   | 6.4658866   |
| "Gpn3"       | 6.2760677   | 6.286612    | 5.8193197   | 6.5700817   | 6.109557    | 6.0849366   | 6.601112    | 6.5891013   |
| "Gpnmb"      | 2.499947    | 2.798693    | 2.448828    | 2.44859     | 2.486713    | 2.6242747   | 2.48951     | 2.4783099   |
| "Gpr108"     | 6.1186604   | 6.062541    | 6.0909686   | 6.1998534   | 6.117277    | 5.536989    | 6.1143403   | 6.185272    |
| "Gpr110"     | 2.6065578   | 2.5762715   | 2.4948025   | 2.5317578   | 2.6028552   | 2.6002984   | 2.5971503   | 2.59718     |
| "Gpr12"      | 1.879601    | 1.8714767   | 1.845891    | 1.860593    | 2.0837822   | 1.8775953   | 3.1421733   | 1.8794266   |
| "Gpr124"     | 3.071124    | 2.1007638   | 2.5470028   | 2.7587895   | 3.3716128   | 2.6866255   | 3.1122837   | 2.7272086   |
| "Gpr125"     | 6.907196    | 7.500757    | 7.3488336   | 7.8295913   | 8.134811    | 7.7998395   | 8.266454    | 7.9063253   |
| "Gpr132"     | 2.3751922   | 2.338521    | 2.3012762   | 2.3227775   | 2.361328    | 2.352701    | 2.3596601   | 2.348285    |
| "Gpr133"     | 3.2133493   | 3.7062054   | 3.139193    | 3.1130002   | 3.1870098   | 3.1801524   | 3.223503    | 3.1733096   |
| "Gpr137b-ps" | 7.0810547   | 6.163808    | 6.8693504   | 6.181043    | 6.2900944   | 6.2485137   | 5.8838573   | 5.650018    |
| "Gpr137b"    | 4.693046867 | 3.817793633 | 4.249364717 | 4.04296125  | 3.926365033 | 3.947883633 | 3.932315017 | 3.8692832   |
| "Gpr146"     | 4.68415475  | 5.3087675   | 5.12255155  | 5.1751288   | 4.3853046   | 5.0653671   | 5.3191105   | 5.55351095  |
| "Gpr155"     | 9.165772    | 7.7444763   | 8.93912     | 9.204089    | 9.037473    | 8.443578    | 9.158698    | 8.583125    |
| "Gpr180"     | 10.122162   | 9.682229    | 9.153787    | 9.181464    | 9.379302    | 9.496042    | 8.955513    | 8.97873     |
| "Gpr182"     | 5.904043    | 4.4449863   | 6.008129    | 5.5616326   | 4.949385    | 5.515302    | 6.1069393   | 5.367583    |
| "Gpr19"      | 4.599809    | 4.566626    | 4.5833488   | 5.426272    | 4.646462    | 4.5975666   | 4.60828     | 4.6079736   |
| "Gpr3"       | 3.0474052   | 3.1177967   | 3.0454426   | 3.059435    | 3.094692    | 3.085237    | 3.0102086   | 3.080951    |
| "Gpr33"      | 2.386463    | 2.376838    | 2.2601063   | 2.3197157   | 2.4067457   | 2.3646934   | 2.3757246   | 2.3614686   |
| "Gpr34"      | 2.709221    | 2.7001567   | 2.5767474   | 2.6471457   | 2.7206268   | 2.7858922   | 2.6776772   | 2.7161627   |
| "Gpr35"      | 2.6437395   | 1.9195542   | 1.8919206   | 1.8999416   | 1.9390082   | 1.9311571   | 1.9413548   | 1.9245145   |
| "Gpr56"      | 2.4013853   | 2.3682299   | 2.2905471   | 2.3284903   | 2.413406    | 2.383042    | 2.3826463   | 2.3728225   |
| "Gpr65"      | 7.2180676   | 5.6123304   | 7.6367426   | 6.5045366   | 6.1955085   | 6.101876    | 6.2838526   | 6.252763    |
| "Gpr85"      | 2.9423422   | 2.928154333 | 2.8078916   | 2.850566767 | 2.977061333 | 2.971290533 | 2.891383    | 2.9951944   |
| "Gpr88"      | 3.2384026   | 3.3007603   | 3.0486796   | 3.1191485   | 3.3259058   | 3.3268723   | 3.1593177   | 3.363432    |
| "Gpr89"      | 7.7831125   | 8.241607    | 8.758165    | 8.700008    | 8.202812    | 7.845086    | 8.437806    | 8.5364275   |
| "Gpr97"      | 6.3488894   | 5.2733097   | 6.262919    | 6.418485    | 5.699811    | 6.4790483   | 6.447435    | 5.9348316   |
| "Gpr98"      | 3.3753463   | 3.12087645  | 3.36851585  | 4.19611565  | 3.74884275  | 3.50126435  | 3.93028115  | 3.98995495  |
| "Gprasp1"    | 2.5395105   | 2.5448072   | 3.1729746   | 3.2819989   | 2.5395591   | 2.5207343   | 2.6356359   | 2.5280395   |
| "Gprc5b"     | 2.4624476   | 2.4325018   | 2.3423219   | 2.3773375   | 2.4480026   | 2.4458706   | 2.436707    | 2.4344177   |
| "Gprc5c"     | 6.602471    | 7.9093976   | 7.673589    | 8.245965    | 7.482356    | 7.2943716   | 8.094894    | 8.030251    |
| "Gprin1"     | 2.9883056   | 2.956642    | 2.9251983   | 2.8642116   | 3.0057464   | 2.9926825   | 2.964356    | 2.962371    |
| "Gps1"       | 8.551554    | 9.26215     | 8.859265    | 8.982519    | 9.1607      | 9.286807    | 9.151069    | 9.155423    |
| "Gps2"       | 5.0684156   | 4.9619837   | 4.685444    | 4.832195    | 4.925722    | 5.0291424   | 5.0319295   | 4.897816    |
| "Gpsm1"      | 3.36669185  | 3.08221545  | 2.5984505   | 2.8927178   | 3.1249758   | 2.95090155  | 3.50907755  | 2.871793    |
| "Gpsm2"      | 5.7275977   | 6.5773363   | 6.64465     | 7.3358073   | 6.466386    | 6.2427826   | 6.7077494   | 6.5391154   |
| "Gpsm3"      | 5.65151     | 4.0389934   | 5.60188     | 4.730408    | 3.9900925   | 4.527907    | 4.1746163   | 4.5897717   |
| "Gpt"        | 9.3372      | 10.358654   | 10.190335   | 10.280229   | 10.320891   | 10.234059   | 10.125073   | 10.495652   |
| "Gpt2"       | 12.72509433 | 13.133345   | 11.37045033 | 12.34476333 | 12.33491167 | 12.777825   | 11.35556867 | 11.54388783 |
| "Gpx1"       | 14.497312   | 14.670286   | 14.761885   | 14.929151   | 14.78626    | 14.66964    | 14.788959   | 14.834434   |
| "Gpx2"       | 3.3634536   | 3.3352442   | 4.5752516   | 3.2970467   | 3.4657404   | 3.3522222   | 3.353523    | 3.369792    |
| "Gpx3"       | 8.117868    | 5.3418813   | 6.847159    | 4.422523    | 5.1087756   | 5.6744814   | 4.334328    | 4.85013     |
| "Gpx4"       | 11.8377475  | 12.0886765  | 12.368466   | 12.2077885  | 11.795447   | 11.838436   | 11.7142675  | 11.6571745  |
| "Gpx6"       | 2.270582    | 2.4122858   | 2.2097793   | 2.4212976   | 2.2496855   | 2.2414649   | 2.2525823   | 2.2388868   |
| "Gpx7"       | 4.5928006   | 5.5150833   | 4.8122444   | 4.335777    | 4.4031687   | 3.5892854   | 4.4685297   | 4.388333    |
| "Gpx8"       | 3.3133836   | 3.1240735   | 4.59664     | 3.0318549   | 3.173276    | 3.1715465   | 3.9064531   | 3.170252    |
| "Gramd1a"    | 5.4811687   | 4.908494    | 5.261232    | 5.7574267   | 5.071881    | 5.122893    | 5.0535846   | 4.938961    |
| "Gramd3"     | 6.2486106   | 6.5905001   | 6.34373855  | 6.92746215  | 6.9291785   | 6.9210787   | 6.8754425   | 7.2555735   |
| "Gramd4"     | 4.413478    | 3.2998874   | 4.2826004   | 3.4432766   | 3.6867442   | 3.3975496   | 3.3986132   | 3.3676085   |
| "Grap2"      | 3.00968275  | 2.9744023   | 2.94338735  | 2.9144158   | 3.0076851   | 2.99142825  | 2.9678026   | 2.99531385  |
| "Grasp"      | 2.4326112   | 2.3886693   | 2.33608     | 2.4955935   | 2.4492395   | 2.3763542   | 2.372855    | 2.395909    |
| "Grb10"      | 7.054789    | 4.1061273   | 4.2174544   | 4.340728    | 3.552785    | 3.9186406   | 4.5016556   | 3.1267133   |
| "Grb14"      | 9.234903    | 10.34675    | 9.200508    | 10.181696   | 9.664709    | 9.981909    | 9.726681    | 10.316878   |
| "Grb2"       | 7.5324045   | 7.03579365  | 7.804019    | 7.27092165  | 7.0527363   | 7.106566    | 7.1631605   | 7.04984095  |
| "Grb7"       | 6.877733    | 7.3504214   | 7.5168037   | 7.662494    | 7.071843    | 7.695662    | 7.7294855   | 7.784815    |
| "Grcc10"     | 6.2177731   | 6.4210469   | 6.2494738   | 6.37378775  | 6.4749945   | 6.66234305  | 6.6670535   | 6.5817661   |
| "Greb1"      | 2.7803006   | 4.920931    | 3.6388052   | 4.2503066   | 3.4137115   | 3.890199    | 3.6737483   | 3.3982685   |
| "Grem2"      | 7.1769342   | 8.334192    | 6.724573    | 8.138836    | 7.5715547   | 8.146126    | 7.4464774   | 8.718076    |
| "Grhl1"      | 3.4935915   | 3.4226522   | 3.381991    | 3.3371284   | 3.6926382   | 3.8120763   | 3.4826145   | 3.4150906   |
| "Grhl2"      | 2.59190395  | 2.5616228   | 2.52155245  | 2.5571698   | 2.58544155  | 2.579376225 | 2.577332875 | 2.579582675 |
| "Grhpr"      | 11.075521   | 11.170361   | 11.001221   | 10.027245   | 10.784245   | 10.8617115  | 10.150044   | 10.531899   |
| "Gria2"      | 2.86869945  | 2.8616328   | 2.79796365  | 2.8062284   | 2.9447174   | 2.9001614   | 2.841038    | 2.81101     |
| "Gria3"      | 2.630449    | 2.7597656   | 2.948214    | 2.556994    | 3.1940646   | 2.5797343   | 2.642444    | 2.5742533   |
| "Grid2ip"    | 2.4799423   | 2.4616966   | 2.4660175   | 2.440087    | 2.4813645   | 2.4558885   | 2.4684396   | 2.4675167   |
| "Grik1"      | 2.906428    | 2.9014857   | 2.7517579   | 2.8305812   | 2.97492     | 2.940093    | 2.891483    | 2.9404528   |
| "Grik3"      | 2.5484202   | 2.532927    | 2.5073652   | 2.5209832   | 2.554657    | 2.5457823   | 2.536706    | 2.5415888   |
| "Grin1"      | 2.0051873   | 2.5796618   | 1.9361229   | 1.955777    | 1.9933212   | 1.9841014   | 1.9968921   | 1.9779935   |
| "Grin3b"     | 3.7392876   | 3.7074578   | 3.6664402   | 3.6662161   | 3.7292187   | 3.7232559   | 3.7079136   | 3.7167885   |
| "Grina"      | 10.197206   | 10.265624   | 9.8421175   | 9.9137      | 9.83093225  | 10.049578   | 9.501053    | 9.5740885   |
| "Grip1"      | 2.77054405  | 2.77848115  | 2.6888825   | 2.70646845  | 2.8010247   | 2.7863034   | 2.7532077   | 2.79276195  |
| "Gripap1"    | 6.056513    | 6.0916104   | 6.2897983   | 6.176312    | 5.8915524   | 6.2903643   | 6.2066064   | 6.0712557   |
| "Grk4"       | 2.76794145  | 2.65778865  | 2.5886388   | 2.6215544   | 2.68497935  | 2.72909515  | 2.6476653   | 2.6619607   |
| "Grk5"       | 4.508584    | 4.2496543   | 5.2559576   | 4.249882    | 3.776621    | 4.476636    | 4.8679924   | 4.4856367   |
| "Grk6"       | 3.917093    | 3.913407    | 4.07273005  | 3.90657055  | 3.97686725  | 4.1358909   | 3.848553    | 3.48138885  |
| "Grif1"      | 7.182806    | 7.7107363   | 7.7427206   | 7.6795955   | 7.6656637   | 7.6684484   | 7.5444393   | 7.672391    |
| "Grm1"       | 3.937747    | 4.290079    | 3.812649    | 3.806717    | 3.9304745   | 4.099525    | 3.8639483   | 3.9612706   |
| "Grn"        | 12.607792   | 12.52777867 | 12.31770933 | 12.20373767 | 12.680689   | 12.95372383 | 11.867841   | 11.69185333 |

|                 |             |             |             |             |             |             |             |             |
|-----------------|-------------|-------------|-------------|-------------|-------------|-------------|-------------|-------------|
| "Grpel1"        | 10.357886   | 10.943017   | 10.692716   | 10.5041685  | 10.76342    | 10.746803   | 10.492493   | 10.58744    |
| "Grpel2"        | 8.218464    | 7.9212704   | 6.978841    | 7.391989    | 7.9186025   | 9.175413    | 7.807473    | 7.833355    |
| "Grpr"          | 2.7417555   | 2.720222    | 2.6045547   | 2.6553226   | 2.7457004   | 2.7427616   | 2.7156112   | 2.7393346   |
| "Grsf1"         | 10.90548633 | 11.195615   | 10.34783467 | 10.749695   | 10.87412133 | 11.09714533 | 10.992329   | 10.96877567 |
| "Grtp1"         | 7.20020795  | 7.1395185   | 6.85663345  | 7.5349385   | 6.437335    | 7.24800895  | 7.2280669   | 7.34795835  |
| "Grwd1"         | 6.330156333 | 6.160364667 | 5.9483029   | 5.535203333 | 6.1693149   | 6.1692977   | 5.7846923   | 5.9158635   |
| "Gsdma"         | 2.9050229   | 2.904463    | 2.7554495   | 2.8019695   | 2.9570258   | 2.941168    | 2.860962    | 2.9723482   |
| "Gsg2"          | 2.631981    | 2.6016574   | 2.4903305   | 2.5874982   | 2.6836092   | 2.620319    | 2.6293826   | 2.6041603   |
| "Gsk3a"         | 7.931214    | 8.2404175   | 7.744491    | 7.93314     | 8.187329    | 8.218291    | 7.9713945   | 7.9622526   |
| "Gsk3b"         | 6.706583    | 6.556463    | 6.4345818   | 6.3785896   | 6.4125714   | 6.3601675   | 6.462244    | 6.273161    |
| "Gsn"           | 6.47553372  | 6.6667868   | 6.5809417   | 7.1549179   | 7.18501208  | 6.93778168  | 7.16366292  | 7.34072522  |
| "Gspt1"         | 7.072529667 | 7.1253534   | 7.2953451   | 7.172852167 | 7.551222667 | 7.458093    | 7.5198583   | 7.5617811   |
| "Gspt2"         | 2.362104    | 2.4905956   | 2.874414    | 2.2726157   | 2.3379688   | 2.3365955   | 2.2455347   | 2.3330848   |
| "Gsr"           | 9.2461615   | 9.2773125   | 9.516576    | 8.6633803   | 8.544784    | 8.52225235  | 8.25949465  | 8.56034265  |
| "Gss"           | 7.6239505   | 7.3514223   | 8.417202    | 8.20829     | 8.281126    | 7.730405    | 8.600185    | 8.772048    |
| "Gsta2"         | 10.424216   | 11.184134   | 12.290554   | 11.9205885  | 7.7961736   | 7.840853    | 8.515389    | 8.396756    |
| "Gsta3"         | 11.7699415  | 11.352648   | 12.389492   | 12.44908175 | 11.2681055  | 9.35038835  | 12.0874355  | 11.896986   |
| "Gsta4"         | 9.650263    | 9.738193    | 11.35631    | 10.704788   | 9.222614    | 7.212652    | 10.6501465  | 10.458386   |
| "Gstk1"         | 10.426028   | 11.302627   | 11.251481   | 11.82829    | 11.481632   | 11.321014   | 11.610482   | 11.739054   |
| "Gstm1"         | 10.57185408 | 10.6692266  | 11.42384313 | 10.4749295  | 8.89906275  | 7.839264725 | 9.1983405   | 8.92926675  |
| "Gstm2"         | 8.54944     | 9.169786    | 10.661031   | 9.21824     | 7.9189076   | 6.405069    | 8.618282    | 7.947445    |
| "Gstm3"         | 7.0347883   | 7.03560235  | 11.088466   | 8.537801    | 4.710911    | 2.8007428   | 5.82413275  | 5.2762343   |
| "Gstm4"         | 5.897996    | 8.0624      | 10.206584   | 8.674903    | 7.4573574   | 7.2193756   | 8.393693    | 8.498726    |
| "Gstm5"         | 8.0824175   | 7.8439236   | 9.056966    | 8.607216    | 8.1531      | 7.085862    | 8.515139    | 8.301818    |
| "Gstm6"         | 6.6795263   | 7.6938825   | 8.348396    | 7.9810405   | 5.644889    | 4.7643642   | 6.892409    | 7.4791527   |
| "Gstm7"         | 5.7377205   | 6.7849493   | 8.2181015   | 7.7163777   | 6.427683    | 6.4018445   | 7.9165006   | 7.715596    |
| "Gsto1"         | 11.268348   | 11.1396515  | 10.96568825 | 10.9685895  | 11.2568245  | 11.125862   | 11.3397385  | 10.945235   |
| "Gstp1"         | 14.35568    | 14.928833   | 14.80236    | 14.9650755  | 14.428927   | 14.917381   | 14.276397   | 15.007317   |
| "Gstt1"         | 10.106299   | 10.876708   | 11.333146   | 11.964038   | 11.754232   | 10.315578   | 12.124727   | 12.091656   |
| "Gstt2"         | 7.3803277   | 9.465687    | 9.004817    | 9.491373    | 9.682829    | 8.975843    | 9.602746    | 10.127754   |
| "Gstt3"         | 6.0775266   | 8.6201725   | 7.8440914   | 8.779332    | 8.66782     | 7.3391476   | 8.649025    | 8.334265    |
| "Gstz1"         | 10.529723   | 11.400061   | 11.34399    | 11.304243   | 11.469923   | 11.23346    | 11.536305   | 11.464956   |
| "Gt(ROSA)26Sor" | 7.2145696   | 7.716637    | 7.439487    | 7.5201902   | 8.3624      | 8.71311     | 8.369137    | 8.168004    |
| "Gtf2a1"        | 5.0921115   | 5.4664213   | 4.9980095   | 5.082294933 | 5.171774567 | 5.3577838   | 5.3663044   | 5.1660141   |
| "Gtf2b"         | 9.583415    | 8.921879    | 8.722246    | 8.985915    | 8.958855    | 8.613178    | 8.552167    | 9.396238    |
| "Gtf2e2"        | 7.960541    | 7.2576175   | 7.4016185   | 7.286727    | 7.1438475   | 7.6435437   | 7.472208    | 7.309705    |
| "Gtf2f1"        | 6.0472003   | 6.3606155   | 6.3672614   | 5.6226335   | 5.9339277   | 6.1259869   | 5.92937825  | 5.6192385   |
| "Gtf2f2"        | 6.6380386   | 6.220773    | 6.1171064   | 5.6007547   | 5.90077     | 6.362645    | 6.002281    | 5.946811    |
| "Gtf2h1"        | 8.051875    | 7.478426    | 6.9044847   | 7.2419605   | 7.385711    | 7.9586024   | 7.52999     | 7.6241975   |
| "Gtf2h2"        | 6.2060394   | 6.2015567   | 6.4632154   | 6.28569     | 6.031643    | 6.180569    | 6.762224    | 6.2930827   |
| "Gtf2h3"        | 4.775533    | 5.045358    | 4.7122703   | 4.777212    | 4.7038007   | 4.9052734   | 4.324527    | 4.619969    |
| "Gtf2h4"        | 5.50301845  | 5.418469875 | 5.531299975 | 5.456253575 | 5.395177675 | 5.704206125 | 5.7624762   | 5.7294688   |
| "Gtf2i"         | 4.8434175   | 4.979574825 | 5.0174141   | 5.090323325 | 5.30179875  | 5.379942125 | 5.168333825 | 5.33773595  |
| "Gtf2ird1"      | 4.4981782   | 4.3888857   | 4.3565311   | 4.08148625  | 4.1278965   | 4.6339214   | 4.359973    | 4.2362261   |
| "Gtf2ird2"      | 5.7728357   | 5.8081017   | 5.234595    | 5.6279902   | 6.04985     | 6.581214    | 5.6504273   | 5.734069    |
| "Gtf3a"         | 6.30147     | 6.5503664   | 6.637952    | 6.741368    | 5.8677187   | 5.616459    | 6.5032086   | 6.482276    |
| "Gtf3c1"        | 6.88552     | 6.717837    | 6.9244375   | 6.8075933   | 6.7901793   | 7.007678    | 6.732916    | 6.7421384   |
| "Gtf3c2"        | 6.551136825 | 6.6798911   | 6.429997675 | 6.58321355  | 6.5090668   | 6.397368075 | 6.63944665  | 6.673067575 |
| "Gtf3c4"        | 6.484028    | 6.455749    | 6.368222    | 6.613221    | 6.4283347   | 6.7031155   | 6.48829     | 6.7052374   |
| "Gtf3c5"        | 4.4558716   | 4.269177    | 4.154884    | 4.2536736   | 4.144746    | 4.208928    | 4.1434207   | 4.195382    |
| "Gtf3c6"        | 5.44948375  | 5.618574    | 5.8711085   | 5.61878485  | 5.17357565  | 5.42669185  | 5.66287485  | 5.6856066   |
| "Gtl3"          | 7.9854195   | 8.4116975   | 8.1442465   | 8.6599075   | 8.47114     | 8.6540695   | 8.69725     | 9.2446435   |
| "Gtpbp1"        | 3.5674657   | 3.614029    | 3.4917625   | 3.52725655  | 3.53628625  | 3.65768385  | 3.47298635  | 3.5927786   |
| "Gtpbp2"        | 6.50941275  | 6.35364295  | 6.24729065  | 6.215538    | 5.95426865  | 6.585156    | 6.04849075  | 6.25906515  |
| "Gtpbp3"        | 5.7184615   | 5.4038196   | 5.464124    | 5.441853    | 4.6851068   | 5.816525    | 5.2996283   | 4.9047947   |
| "Gtpbp4"        | 8.89657     | 8.637879333 | 7.580026167 | 7.697557433 | 8.178424    | 8.334974467 | 8.085429667 | 8.132322    |
| "Gtpbp5"        | 4.12608325  | 4.10105475  | 4.0773146   | 4.09554915  | 4.11140825  | 4.1221652   | 4.22840595  | 4.2032094   |
| "Gtpbp6"        | 4.5052385   | 4.120284    | 4.07094     | 3.3185356   | 4.114361    | 4.3844185   | 4.0487967   | 4.1240077   |
| "Gtpbp8"        | 4.0589857   | 4.292179    | 4.527283    | 4.4943943   | 4.755235    | 4.514921    | 4.626725    | 4.433594    |
| "Gtse1"         | 2.4108608   | 2.3833752   | 2.3094528   | 2.3753388   | 2.406911    | 2.401562    | 2.4001274   | 2.3953753   |
| "Guca1a"        | 2.2554412   | 2.1629493   | 2.8537757   | 2.1832063   | 2.2199514   | 2.2126782   | 2.222608    | 2.2040684   |
| "Guca2b"        | 2.3763087   | 2.3584936   | 2.3200006   | 2.2891865   | 2.368493    | 2.3733373   | 2.369862    | 2.4883125   |
| "Gucy1a3"       | 2.72056     | 2.4978068   | 2.5414958   | 2.4367864   | 2.519901    | 2.51107     | 2.503318    | 2.4797678   |
| "Gucy1b3"       | 5.8012195   | 5.16166     | 5.980919    | 5.8472457   | 5.401433    | 5.2315655   | 6.5276647   | 5.5464897   |
| "Gucy2c"        | 2.3858676   | 2.354785    | 4.4998646   | 2.3248343   | 2.3799489   | 2.3749554   | 2.3646371   | 2.3708818   |
| "Gucy2e"        | 2.1839592   | 2.1623094   | 2.1322465   | 2.15266     | 2.1841736   | 2.1764925   | 2.1742558   | 2.4162397   |
| "Guk1"          | 7.912532    | 8.649554    | 8.05339     | 8.0163965   | 8.222365    | 8.252235    | 7.9172473   | 7.9142637   |
| "Gulo"          | 8.256163    | 8.686356    | 9.163152    | 9.821861    | 9.854373    | 8.265667    | 9.890778    | 9.802831    |
| "Gusb"          | 6.75854125  | 5.8120861   | 6.04730915  | 5.6609737   | 6.09910385  | 6.1442699   | 5.64227865  | 5.81232015  |
| "Gyg"           | 6.4882836   | 6.3928595   | 7.128028    | 6.5384383   | 6.4378614   | 5.9980993   | 6.3207517   | 6.144876    |
| "Gyk"           | 9.754642    | 9.3585335   | 9.284596    | 9.45154     | 9.15193725  | 9.5047545   | 10.0501955  | 9.619202    |
| "Gyk11"         | 2.5219128   | 2.4878902   | 2.4430423   | 2.4680061   | 2.5087519   | 2.51509     | 2.4978268   | 2.5004294   |
| "Gypa"          | 2.628024    | 2.5640588   | 2.5147176   | 2.5403757   | 2.6024244   | 2.599646    | 2.5862513   | 2.5775242   |
| "Gypc"          | 6.052384    | 6.5568495   | 6.626245    | 7.3353605   | 6.319415    | 6.4268694   | 6.633497    | 6.552411    |
| "Gys1"          | 2.6152022   | 3.007065    | 2.71709875  | 2.77158965  | 2.875108    | 2.8541794   | 2.7916629   | 2.787541    |
| "Gys2"          | 9.683481    | 10.1184225  | 8.456544    | 10.069837   | 10.278817   | 9.793023    | 9.4233265   | 10.340504   |
| "Gzma"          | 6.6879916   | 3.6804132   | 7.270962    | 5.318926    | 5.409274    | 5.0898104   | 5.8273754   | 4.2366676   |
| "Gzmb"          | 4.7209263   | 3.565316    | 5.485428    | 3.6620772   | 3.2327      | 3.3773503   | 3.901242    | 3.5686588   |
| "Gzmc"          | 2.5705514   | 2.5572379   | 2.474448    | 2.5356467   | 2.5782845   | 2.584292    | 2.5783937   | 2.5677543   |
| "Gzmd"          | 2.6150501   | 2.588396967 | 2.490145133 | 2.551746267 | 2.641288    | 2.603751467 | 2.5889658   | 2.617687267 |
| "Gzme"          | 2.85454     | 2.8229635   | 2.6618147   | 2.710426    | 2.8946679   | 2.8348348   | 2.7847219   | 2.8761518   |

|            |             |             |             |             |             |             |             |             |
|------------|-------------|-------------|-------------|-------------|-------------|-------------|-------------|-------------|
| "Gzmf"     | 3.1611218   | 3.1898906   | 3.0024893   | 3.110106    | 3.2536063   | 3.2531161   | 3.1081445   | 3.2303715   |
| "Gzmk"     | 2.438737    | 2.4064255   | 2.3496642   | 2.365275    | 2.8560238   | 2.4224017   | 2.4255788   | 2.414097    |
| "Gzmm"     | 2.294084    | 2.263278    | 2.2069762   | 2.2343087   | 2.2809548   | 2.397386    | 2.285977    | 2.2735524   |
| "Gzmn"     | 2.7226021   | 2.6947975   | 2.6212783   | 2.6619408   | 2.7298095   | 2.7171023   | 2.7065942   | 2.724283    |
| "H13"      | 3.95172218  | 4.38045574  | 4.21076214  | 4.38233158  | 4.42622378  | 4.38772152  | 4.33879802  | 4.57961286  |
| "H1f0"     | 8.675944    | 8.7499602   | 8.233418    | 8.43566835  | 8.6920782   | 8.9450917   | 8.3618625   | 8.3223378   |
| "H1foo"    | 2.843478    | 2.815415    | 2.7800028   | 2.7832143   | 2.8344889   | 2.887215    | 2.7862635   | 2.875855    |
| "H2-Aa"    | 8.2330435   | 6.99096315  | 10.266562   | 9.04100115  | 7.8441888   | 6.96537225  | 9.505224    | 9.06410085  |
| "H2-Ab1"   | 6.179773733 | 4.733241    | 8.190845    | 6.9448777   | 5.772946533 | 4.7670302   | 7.062045    | 6.885385833 |
| "H2-Bi"    | 3.795424    | 3.2561193   | 3.2324708   | 3.7414422   | 3.2853131   | 3.0378287   | 3.244104    | 3.301173    |
| "H2-D1"    | 8.063345033 | 7.625280922 | 7.732858511 | 7.809638744 | 7.593378522 | 7.662863244 | 7.588684122 | 7.618742311 |
| "H2-DMa"   | 5.6384745   | 3.5541127   | 7.105263    | 5.6965275   | 5.122039    | 4.5914717   | 5.782343    | 5.5851965   |
| "H2-DMb1"  | 3.47778885  | 3.1240209   | 5.20156955  | 3.9413229   | 3.4079399   | 3.16361475  | 3.8145809   | 3.56270235  |
| "H2-DMb2"  | 3.2232826   | 3.6094534   | 3.477185    | 3.4637983   | 3.5912395   | 3.6455865   | 3.551075    | 3.9494367   |
| "H2-Ea-ps" | 4.2835506   | 4.46249535  | 3.9807723   | 4.19608905  | 4.3840475   | 4.3059346   | 4.093801    | 4.2544969   |
| "H2-Eb1"   | 7.856004    | 6.3441944   | 9.76769     | 8.525793    | 7.679771    | 6.821508    | 8.9904585   | 8.664422    |
| "H2-K1"    | 10.94744725 | 10.71271808 | 10.77578793 | 10.99755168 | 10.65217075 | 10.61218788 | 10.49147525 | 10.64748088 |
| "H2-Ke2"   | 8.947692    | 9.221136    | 9.103159    | 8.997376    | 9.119503    | 9.280628    | 9.891108    | 9.071722    |
| "H2-Ke6"   | 8.858996    | 9.54091     | 9.079045    | 9.537386    | 9.373506    | 9.228682    | 9.435124    | 9.436224    |
| "H2-M10.1" | 2.6639614   | 2.6305575   | 2.601097    | 2.599488    | 2.6526496   | 2.7241373   | 2.6523936   | 2.637812    |
| "H2-M3"    | 7.1546164   | 6.0731726   | 7.9915032   | 7.369627    | 6.575408    | 6.5583587   | 7.0155287   | 6.818278    |
| "H2-M9"    | 3.1609416   | 3.1583292   | 2.949885    | 3.2869048   | 3.1863165   | 3.2494442   | 3.0601528   | 3.33933     |
| "H2-Ob"    | 2.6242008   | 2.5960267   | 2.5918472   | 2.5637057   | 2.6546812   | 2.63169     | 2.6066103   | 2.6437814   |
| "H2-Q10"   | 12.641081   | 13.034283   | 13.407151   | 13.3088665  | 12.795613   | 12.675545   | 13.359716   | 13.270942   |
| "H2-Q2"    | 3.0896008   | 3.0685804   | 2.9175181   | 2.9798958   | 3.1254847   | 3.1273634   | 3.0668368   | 3.1545808   |
| "H2-Q4"    | 7.096679    | 5.808652    | 6.1796827   | 6.8519244   | 6.056533    | 6.0004907   | 6.386266    | 6.072874    |
| "H2-Q6"    | 10.048372   | 8.677808    | 9.494055    | 9.671425    | 8.98615     | 8.610894    | 8.903463    | 9.215564    |
| "H2-Q7"    | 11.341779   | 10.32868    | 10.82387    | 10.887634   | 10.403185   | 10.707867   | 10.746489   | 11.000395   |
| "H2-T10"   | 7.05156725  | 7.0771746   | 7.44640815  | 7.547533    | 6.829696    | 6.6095145   | 7.13493075  | 7.1017108   |
| "H2-T18"   | 3.2079525   | 3.2567724   | 3.14283895  | 3.221572    | 3.40742205  | 3.3134837   | 3.178207    | 3.4066755   |
| "H2-T24"   | 2.9408462   | 2.8978696   | 2.8549585   | 2.8821507   | 2.9169414   | 2.9135392   | 2.9248593   | 2.9061232   |
| "H28"      | 2.82339825  | 2.82874315  | 2.71483695  | 2.76959235  | 2.85938215  | 2.87511585  | 2.80194     | 2.85913975  |
| "H2afj"    | 4.4606146   | 4.577812433 | 4.4633364   | 4.4777359   | 4.498970333 | 4.588483467 | 4.594580133 | 4.5937202   |
| "H2afv"    | 9.034223    | 9.486428    | 8.987405    | 9.472196    | 9.037109    | 9.185607    | 9.538179    | 9.763737    |
| "H2afx"    | 5.7454343   | 6.00004     | 5.893042    | 5.7928634   | 6.055964    | 6.0287795   | 5.693501    | 6.130915    |
| "H2afy"    | 9.545501    | 9.885584    | 9.866381    | 10.017309   | 9.97798     | 9.7908      | 10.067659   | 10.131828   |
| "H2afy2"   | 3.279482    | 2.95267835  | 2.92280615  | 2.9066466   | 2.97222915  | 3.02249415  | 2.95075295  | 2.9651814   |
| "H2afz"    | 10.178848   | 9.8217495   | 10.2669805  | 10.19529825 | 10.0498165  | 9.977864    | 6.689578    | 10.3117825  |
| "H47"      | 10.62613833 | 10.20822333 | 10.4424185  | 9.808488667 | 10.35257333 | 10.45469933 | 10.05655183 | 10.052865   |
| "H6pd"     | 11.158426   | 10.095487   | 10.601585   | 10.54364    | 10.234304   | 10.523682   | 10.199861   | 10.842623   |
| "Haa0"     | 9.272942    | 9.995503    | 10.384108   | 10.523332   | 10.511318   | 9.875131    | 10.626511   | 10.768827   |
| "Habp2"    | 4.55204955  | 4.361444    | 4.31809585  | 4.5529278   | 4.94598165  | 4.5285641   | 5.57774325  | 5.0590364   |
| "Habp4"    | 5.7501481   | 6.5087363   | 6.736024    | 6.8322363   | 6.374315    | 6.13322065  | 6.43916535  | 6.7790675   |
| "Hace1"    | 4.994569    | 4.9385285   | 4.818618    | 4.9103584   | 5.036442    | 5.205835    | 5.2702894   | 5.108134    |
| "Hac11"    | 12.789185   | 13.002947   | 12.369467   | 11.725508   | 12.889947   | 13.008721   | 12.5037775  | 12.225137   |
| "Hadh"     | 9.587955167 | 9.818831667 | 10.19137767 | 10.748941   | 10.80882577 | 9.963487033 | 10.86607347 | 10.73238    |
| "Hadh"     | 8.447393    | 9.715526    | 8.475792    | 9.084743    | 9.788355    | 9.784894    | 9.219925    | 9.346802    |
| "Hadh"     | 10.9169505  | 11.85616425 | 10.677393   | 11.266466   | 11.927194   | 12.07730325 | 11.7328415  | 11.660526   |
| "Hagh"     | 11.65123983 | 11.6457835  | 11.716146   | 12.05516933 | 11.72073867 | 12.10887533 | 12.061433   | 12.256232   |
| "Hal"      | 11.916472   | 11.008104   | 12.143223   | 11.994633   | 11.725056   | 11.648369   | 12.077738   | 11.930792   |
| "Hamp"     | 13.6010545  | 11.6592095  | 11.4199675  | 10.709776   | 13.012944   | 11.7970005  | 11.549626   | 11.4527775  |
| "Hamp2"    | 8.338505    | 7.081104    | 8.531101    | 5.4795136   | 9.600825    | 6.488181    | 9.292597    | 7.751301    |
| "Hand1"    | 2.5417304   | 2.49385     | 2.4462428   | 2.4710832   | 2.5266833   | 2.6280403   | 2.5078433   | 2.5155132   |
| "Hand2"    | 2.4294157   | 2.3963366   | 2.3150685   | 2.3834465   | 2.4308183   | 2.4119208   | 2.4226449   | 2.4166138   |
| "Hao1"     | 9.656918    | 10.794302   | 10.863431   | 10.622489   | 10.823925   | 10.302181   | 11.395409   | 11.356296   |
| "Hao2"     | 2.4341195   | 2.4214826   | 6.747094    | 2.3621595   | 2.4446368   | 2.4367592   | 6.533587    | 2.4304192   |
| "Hap1"     | 2.4874418   | 2.8117526   | 2.3802133   | 2.4404857   | 2.467849    | 2.4661767   | 2.404228    | 2.6056879   |
| "Hapl1"    | 2.93530265  | 2.93105555  | 2.8392554   | 3.439129    | 2.9861384   | 2.99553205  | 2.9222691   | 3.07004015  |
| "Hars"     | 9.158437    | 8.945835    | 9.073077    | 8.7831415   | 9.0670625   | 9.25784425  | 8.998211    | 8.9281685   |
| "Hars2"    | 6.1673787   | 5.96045115  | 6.07227     | 6.37301155  | 6.44802785  | 6.24427735  | 6.71411635  | 6.72616565  |
| "Has2"     | 2.5317015   | 2.5014446   | 2.4227927   | 2.4568262   | 2.5259376   | 2.51461515  | 2.5141888   | 2.513945    |
| "Hat1"     | 8.133376    | 7.7017813   | 8.00334     | 7.570883    | 7.016359    | 7.2918677   | 7.8204107   | 7.832809    |
| "Haus1"    | 5.784191    | 6.851213    | 6.5540247   | 7.036347    | 6.744283    | 6.5854115   | 6.5621033   | 6.73337     |
| "Haus2"    | 6.9546924   | 6.43246     | 6.5851436   | 6.6775045   | 6.578688    | 6.555215    | 6.9181385   | 6.721718    |
| "Haus3"    | 7.369797    | 5.7153444   | 6.6976695   | 6.7726545   | 6.2688837   | 6.6411047   | 6.9695315   | 7.0877104   |
| "Haus4"    | 7.310439    | 7.6045523   | 6.472091    | 7.136403    | 7.511904    | 7.5270104   | 7.233605    | 7.981702    |
| "Haus5"    | 4.987238533 | 4.959463267 | 4.7498443   | 4.535529167 | 4.834520767 | 4.761653633 | 4.759399533 | 4.878179067 |
| "Haus6"    | 2.4711041   | 2.6291537   | 2.5675      | 2.6011543   | 2.6589837   | 3.220684    | 3.4333255   | 2.8908691   |
| "Haus7"    | 4.6652036   | 6.7175136   | 6.6632347   | 6.01774     | 5.3438063   | 4.843647    | 5.7520947   | 5.7753677   |
| "Haus8"    | 2.4213548   | 2.8115792   | 2.8661263   | 3.4631243   | 2.460834    | 3.0528517   | 2.8637292   | 2.8518798   |
| "Havcr1"   | 2.8865094   | 2.878313    | 2.7753806   | 2.8404384   | 2.9129567   | 2.8976634   | 2.8972554   | 2.9211771   |
| "Havcr2"   | 2.8044505   | 2.3099015   | 2.3290076   | 2.275274    | 2.3295674   | 2.3132136   | 2.330234    | 2.3537366   |
| "Hax1"     | 10.40492275 | 10.2468175  | 10.3056575  | 10.288213   | 10.3599745  | 10.895983   | 10.367106   | 10.4504685  |
| "Hba-a1"   | 10.67206215 | 10.49009775 | 9.73866475  | 10.72548618 | 10.77577613 | 10.6293811  | 10.4339424  | 9.72037145  |
| "Hbb-b2"   | 4.0865397   | 4.047368    | 3.6250682   | 4.040813    | 4.2278657   | 4.0618753   | 4.0742607   | 4.0554056   |
| "Hbb-bh1"  | 2.70595245  | 2.67690465  | 2.62446545  | 2.6448236   | 2.7225678   | 2.7021457   | 2.6927363   | 2.6943757   |
| "Hbb-y"    | 2.667750833 | 2.643586233 | 2.555265133 | 2.5974241   | 2.6722078   | 2.665014333 | 2.641646133 | 2.6725205   |
| "Hbegf"    | 6.71435465  | 2.6369921   | 3.5522199   | 3.3258386   | 2.45502335  | 2.4452691   | 3.35420365  | 2.5905973   |
| "Hbp1"     | 7.923572067 | 8.054518133 | 7.8234211   | 8.120370467 | 7.992084733 | 8.070797667 | 8.1180574   | 8.219864233 |
| "Hbxiip"   | 10.284344   | 10.1755295  | 10.2520655  | 10.262552   | 10.048944   | 10.069327   | 10.3920755  | 10.151415   |
| "Hc"       | 13.092863   | 13.202231   | 13.285611   | 13.53158    | 13.223889   | 13.625793   | 13.200064   | 13.804764   |

|            |             |             |             |             |             |             |             |             |
|------------|-------------|-------------|-------------|-------------|-------------|-------------|-------------|-------------|
| "Hccs"     | 4.8168724   | 5.11982965  | 4.99730225  | 4.87779495  | 5.1749089   | 5.1914416   | 5.18673395  | 5.18074125  |
| "Hcfc1"    | 6.4319425   | 6.745567    | 6.625886    | 6.361582    | 6.497801    | 6.7518616   | 6.593167    | 6.6894      |
| "Hcfc1r1"  | 8.2623795   | 8.8253003   | 8.73749265  | 8.9173851   | 8.4917255   | 8.17585825  | 8.87396675  | 8.82259065  |
| "Hck"      | 8.452108    | 6.562137    | 9.390445    | 8.274904    | 7.258125    | 7.331749    | 7.7509823   | 7.51529     |
| "Hcls1"    | 5.3454075   | 3.83565     | 5.8370843   | 5.0121593   | 4.1367717   | 3.6921358   | 4.5371475   | 4.440257    |
| "Hcn2"     | 3.4793038   | 3.5361989   | 3.3210301   | 3.379656    | 3.512724    | 3.5096843   | 3.428831    | 3.46452     |
| "Hcst"     | 3.9006543   | 3.2272432   | 4.2036505   | 3.7498627   | 2.8753567   | 3.4026878   | 3.4182537   | 3.391015    |
| "Hdac1"    | 8.089471    | 7.917081    | 8.372193    | 8.093253    | 7.7916574   | 7.7789254   | 7.96202     | 7.893969    |
| "Hdac11"   | 5.49133835  | 5.69188065  | 5.71768     | 6.8770902   | 6.3344395   | 6.0423645   | 6.8149213   | 7.4271985   |
| "Hdac2"    | 7.772166    | 7.7927113   | 8.02866     | 7.301189    | 7.8129907   | 7.843742    | 8.45141     | 7.878668    |
| "Hdac3"    | 6.849109    | 7.638098    | 7.80188     | 7.755604    | 7.7528415   | 7.5532794   | 7.866684    | 7.7628403   |
| "Hdac5"    | 2.9510813   | 2.383563    | 2.5764503   | 2.9591007   | 2.5092974   | 2.739977    | 2.853979    | 2.6084242   |
| "Hdac6"    | 5.3187027   | 5.2057      | 5.874841    | 5.8001037   | 5.900446    | 5.6004143   | 6.130119    | 5.476421    |
| "Hdac7"    | 2.3255394   | 2.3514235   | 2.3043187   | 2.2686448   | 2.3553777   | 2.3335345   | 2.3119812   | 2.3305042   |
| "Hdac9"    | 2.38877     | 2.3616128   | 2.3326354   | 2.3429248   | 2.3870726   | 2.3722382   | 2.3781376   | 2.402088    |
| "Hdc"      | 4.4117304   | 3.0658943   | 3.0613687   | 3.3124377   | 3.08055485  | 2.95707595  | 3.0489592   | 3.10892035  |
| "Hddc2"    | 5.315176    | 5.095842    | 5.8422546   | 4.242962    | 4.9102736   | 4.6009145   | 4.9008965   | 4.9043226   |
| "Hdggf"    | 7.465641667 | 7.707758    | 7.433600233 | 7.5832615   | 7.6084761   | 7.670118833 | 7.650236    | 8.0604895   |
| "Hdggf1"   | 2.508136    | 2.47880295  | 2.4406499   | 2.4623313   | 2.4974135   | 2.48975865  | 2.4917516   | 2.51050535  |
| "Hdgfrp2"  | 3.946186933 | 4.195137867 | 3.682089467 | 3.5287749   | 3.880915133 | 3.9137747   | 3.8407723   | 3.83904     |
| "Hdgfrp3"  | 3.1125169   | 2.918686933 | 2.8654954   | 2.9188662   | 3.0469644   | 2.954868433 | 3.0604389   | 3.031689833 |
| "Hdh2"     | 7.5723376   | 7.9088435   | 8.186634    | 7.961533    | 7.9619904   | 7.9981523   | 8.072844    | 8.294634    |
| "Hdh3"     | 1.7744064   | 3.5733805   | 5.2768683   | 4.128221    | 3.7127082   | 2.4300804   | 5.424347    | 4.010726    |
| "Hdlbp"    | 8.60388028  | 8.49445614  | 8.51558542  | 8.40916966  | 8.7134146   | 8.3196528   | 8.11978552  | 8.36206694  |
| "Heatr1"   | 5.39719395  | 5.21094425  | 5.1165981   | 5.1837293   | 4.9959556   | 5.1147226   | 4.9537743   | 5.08249335  |
| "Heatr2"   | 3.690112767 | 3.783488767 | 3.5123913   | 3.4978312   | 3.602917333 | 3.707406967 | 3.578535    | 3.516028567 |
| "Heatr5b"  | 2.6609924   | 2.7268884   | 2.5418847   | 2.6095192   | 2.6670954   | 2.8682961   | 2.648417    | 2.650534    |
| "Heatr6"   | 3.574097167 | 3.840846833 | 3.904339    | 3.9388905   | 3.977571567 | 4.053049967 | 4.125808733 | 3.982805633 |
| "Heatr7a"  | 4.551186    | 4.841568    | 4.8594856   | 4.822597    | 5.22711     | 5.0469456   | 4.868716    | 4.848028    |
| "Hebp1"    | 11.539156   | 11.983429   | 12.05565    | 12.21408    | 11.986111   | 11.664587   | 11.927836   | 12.185764   |
| "Hebp2"    | 2.5811665   | 2.71378765  | 3.04627845  | 2.6285461   | 2.56178785  | 2.6968211   | 3.1035784   | 2.67519925  |
| "Hectd1"   | 10.879231   | 11.15148    | 10.100754   | 10.449552   | 11.268812   | 11.518672   | 10.67534    | 11.076341   |
| "Hectd3"   | 5.1366053   | 6.02441     | 6.00154     | 6.135807    | 6.0900235   | 6.0416203   | 6.0798798   | 6.02441     |
| "Helb"     | 5.289396667 | 4.84772     | 4.642688733 | 4.7942897   | 4.861963333 | 4.995877833 | 4.5622617   | 4.9784166   |
| "Helis"    | 2.534696    | 2.4033966   | 2.563326    | 2.4602394   | 2.5404267   | 2.4655437   | 2.845142    | 2.523932    |
| "Helz"     | 6.5747843   | 6.724646    | 6.52367375  | 6.4141932   | 6.9380059   | 6.9775149   | 6.85525845  | 6.63473775  |
| "Hemgn"    | 2.3451192   | 2.3164134   | 2.2641287   | 2.2951524   | 2.3384585   | 2.4186249   | 2.308774    | 2.325442    |
| "Hemk1"    | 3.037111    | 3.4162145   | 3.1813917   | 3.2431157   | 3.2405734   | 3.077865    | 3.2440412   | 3.2255092   |
| "Hepacam2" | 2.4291527   | 2.396061    | 2.335785    | 2.375117    | 2.4182942   | 2.4102724   | 2.4164402   | 2.4008715   |
| "Heph"     | 3.5352328   | 3.3743439   | 3.9177814   | 3.4024231   | 3.851562    | 3.6377437   | 4.1822896   | 3.4405196   |
| "Herc1"    | 5.16786135  | 4.9669447   | 4.7084254   | 4.7749226   | 5.2142518   | 5.2255796   | 5.19475845  | 5.125756    |
| "Herc2"    | 5.2178962   | 5.12932775  | 5.25630515  | 5.13926775  | 5.226117    | 5.3885179   | 5.2298032   | 5.37952535  |
| "Herc4"    | 6.13057515  | 5.9808832   | 6.16166535  | 6.1672242   | 5.9618654   | 6.0456754   | 6.00010705  | 6.1657581   |
| "Herpud1"  | 11.7288615  | 11.3376675  | 10.227631   | 10.469818   | 12.0003495  | 11.660782   | 11.2884465  | 10.968504   |
| "Herpud2"  | 8.160978133 | 7.51366     | 7.507763733 | 7.090298533 | 7.503295867 | 7.5797618   | 7.7030072   | 7.129218467 |
| "Hes1"     | 4.7518597   | 3.6061091   | 4.4271374   | 4.3682117   | 4.40152     | 4.545271    | 6.8861322   | 4.6948357   |
| "Hes2"     | 2.4516368   | 2.4222806   | 2.366024    | 2.3872516   | 2.443746    | 2.4372382   | 2.442551    | 2.4304996   |
| "Hes5"     | 2.71622285  | 2.6877915   | 2.6259326   | 2.8524307   | 2.7917826   | 2.77650515  | 2.6959705   | 2.71585375  |
| "Hes6"     | 6.989003    | 8.17084475  | 7.5785765   | 8.363097    | 7.495698    | 7.091985    | 7.2000985   | 8.5908565   |
| "Hes7"     | 2.8275526   | 2.8229232   | 2.7799587   | 2.8159914   | 2.837946    | 2.8364942   | 2.8407829   | 2.8242214   |
| "Hexa"     | 11.163832   | 10.407811   | 11.344922   | 11.199182   | 10.846348   | 10.8497715  | 10.784723   | 10.724065   |
| "Hexb"     | 9.5943775   | 8.3245195   | 10.436656   | 10.10119725 | 9.73524875  | 8.7852435   | 10.117964   | 9.270196    |
| "Hexdc"    | 2.9307387   | 4.323964    | 3.69399     | 4.123299    | 3.8217046   | 3.7414386   | 3.8370104   | 4.1222496   |
| "Hexim1"   | 6.79329935  | 7.263695    | 7.1244835   | 7.10649375  | 7.8118492   | 7.53883925  | 7.308753    | 7.36099625  |
| "Hey1"     | 2.0017462   | 2.0352554   | 2.366706    | 2.0202641   | 2.0550146   | 2.0458658   | 1.9924862   | 2.0411167   |
| "Hey2"     | 3.3695006   | 3.3363068   | 3.1343505   | 3.214427    | 3.4380198   | 3.429073    | 3.2365753   | 3.4629638   |
| "Heyl"     | 2.5273716   | 2.494219    | 2.4094193   | 2.4479706   | 2.519509    | 2.5174024   | 2.517164    | 2.5142548   |
| "Hfe"      | 9.626065    | 8.7165      | 9.2749485   | 9.05700665  | 8.35812365  | 8.58816535  | 8.1807975   | 8.018876    |
| "Hgd"      | 13.319356   | 12.77084    | 13.0741     | 13.238768   | 12.9972315  | 13.223762   | 13.106023   | 13.041675   |
| "Hgf"      | 2.71294845  | 2.6582602   | 2.70722115  | 2.63374125  | 2.7129862   | 2.7051388   | 2.6925341   | 2.69151405  |
| "Hgfac"    | 9.505268    | 9.540736    | 10.3424835  | 10.666543   | 10.724609   | 9.979912    | 10.390131   | 10.331745   |
| "Hgs"      | 5.0917616   | 4.812378    | 5.091359    | 4.846961    | 4.84367     | 4.7847724   | 4.6055813   | 4.570344    |
| "Hgsnat"   | 10.169508   | 10.110599   | 9.984208    | 9.660113    | 10.041044   | 9.585049    | 9.266649    | 9.229954    |
| "Hhat"     | 2.6882348   | 2.6596475   | 2.6016572   | 2.6265888   | 2.6786764   | 2.6917212   | 2.6769128   | 2.6624222   |
| "Hhex"     | 9.007322    | 10.401118   | 10.529102   | 10.310983   | 10.752309   | 10.126026   | 9.95356     | 11.274315   |
| "Hhip"     | 3.0018742   | 2.9975007   | 2.9404507   | 2.8924334   | 3.057005    | 3.1390128   | 2.9172099   | 3.0620332   |
| "Hiat1"    | 8.140428    | 7.9536852   | 7.66524135  | 7.6663      | 7.50112715  | 7.85884285  | 7.577404    | 7.6059921   |
| "Hiatl1"   | 8.983141    | 8.326469    | 9.050266    | 8.873633    | 8.721726    | 8.781324    | 9.184974    | 8.9017      |
| "Hibadh"   | 11.130688   | 11.3726975  | 11.70128    | 12.0339245  | 11.595159   | 11.140503   | 12.1373695  | 11.9644465  |
| "Hibch"    | 8.4508371   | 8.7397503   | 8.5200839   | 9.198599    | 9.0519063   | 8.69013405  | 9.593378    | 9.2360525   |
| "Hic1"     | 3.2858236   | 3.3579636   | 3.2226067   | 3.4512079   | 3.1098657   | 3.2617092   | 3.013402    | 3.2529964   |
| "Hic2"     | 2.3670256   | 2.464569    | 2.2609565   | 2.2906587   | 2.3634858   | 2.3442051   | 2.344695    | 2.3651962   |
| "Hif1a"    | 6.6821331   | 6.713281733 | 6.525133267 | 6.7353181   | 6.490139233 | 6.7505743   | 6.76754     | 6.589887767 |
| "Hif3a"    | 2.4025989   | 2.3778791   | 2.3246229   | 2.3718033   | 2.3982186   | 2.390834    | 2.2727969   | 2.4196806   |
| "Higd1a"   | 7.923002167 | 8.234644667 | 7.590978867 | 8.1068669   | 7.988788667 | 7.789153133 | 7.921376067 | 7.812691233 |
| "Higd1b"   | 2.4176097   | 2.3848643   | 2.3270717   | 2.3559031   | 2.406611    | 2.398612    | 2.4001935   | 2.399469    |
| "Higd2a"   | 11.175974   | 11.323788   | 11.388246   | 11.62392    | 11.528658   | 11.489278   | 11.466231   | 11.541287   |
| "Hiipda"   | 7.7560115   | 4.7914305   | 4.2025247   | 3.4178998   | 3.586552    | 4.9230814   | 3.4753723   | 3.4166512   |
| "Hils1"    | 2.459147    | 2.465058    | 2.3965547   | 2.426436    | 2.45682     | 2.5691388   | 2.4460661   | 2.4445806   |
| "Hinfp"    | 3.0263205   | 3.3995628   | 2.9581728   | 3.2559438   | 2.9903111   | 3.1187506   | 3.045576    | 3.1253068   |
| "Hint1"    | 13.2290905  | 13.429241   | 13.140576   | 13.0971295  | 13.1876675  | 13.5114195  | 13.094607   | 13.1967475  |

|              |             |             |             |             |             |             |             |             |
|--------------|-------------|-------------|-------------|-------------|-------------|-------------|-------------|-------------|
| "Hint2"      | 10.090547   | 10.838239   | 10.286169   | 10.484155   | 10.612471   | 10.542399   | 10.3783245  | 10.554855   |
| "Hint3"      | 8.884027    | 9.529751    | 9.528641    | 9.749927    | 9.142536    | 9.161291    | 9.763615    | 9.755264    |
| "Hip1"       | 4.1310518   | 3.07391875  | 3.60249685  | 3.3545089   | 3.4734149   | 3.6280299   | 3.29619645  | 3.293828    |
| "Hip1r"      | 7.160018467 | 5.910114133 | 5.1035601   | 4.891176867 | 4.9438388   | 5.567197267 | 4.927976267 | 4.941819467 |
| "Hipk1"      | 5.6600409   | 5.93306115  | 5.2747803   | 5.31956755  | 5.90781835  | 5.5156135   | 5.3339482   | 5.4317425   |
| "Hipk2"      | 4.907536267 | 5.419047467 | 5.304306733 | 5.4188181   | 5.704126467 | 5.090761933 | 5.378389533 | 5.534886667 |
| "Hipk3"      | 7.2097585   | 6.8915195   | 6.52999915  | 6.74196145  | 6.87989475  | 6.77865225  | 6.87885865  | 6.8242279   |
| "Hira"       | 3.32331075  | 3.1885773   | 3.0394398   | 3.1651691   | 3.447186    | 3.18679465  | 3.19584415  | 3.1965778   |
| "Hist1h1c"   | 12.824593   | 10.8706485  | 10.873791   | 10.6715265  | 9.8583555   | 11.6291515  | 9.949036    | 8.4842095   |
| "Hist1h1e"   | 5.243453    | 2.6927047   | 2.6437793   | 2.6319718   | 2.7297146   | 2.7187967   | 2.6930923   | 2.7241356   |
| "Hist1h1t"   | 2.5750682   | 2.567315    | 2.5266066   | 2.5477958   | 2.5867388   | 2.5816345   | 2.5902305   | 2.572419    |
| "Hist1h2ab"  | 8.449404    | 6.355939    | 8.520964    | 7.8345      | 7.685746    | 7.542491    | 8.0651455   | 6.9387956   |
| "Hist1h2bc"  | 12.8005195  | 12.415711   | 12.401048   | 12.603779   | 12.5443665  | 12.310148   | 12.74899    | 12.10567425 |
| "Hist1h2bp"  | 6.8985944   | 6.8030686   | 6.7131653   | 6.927651    | 6.836443    | 6.81734     | 6.8179975   | 6.540079    |
| "Hist1h3a"   | 2.4465764   | 2.1619875   | 2.1505895   | 2.1705759   | 2.183803    | 2.1925344   | 2.208845    | 2.1888504   |
| "Hist1h3b"   | 3.952928033 | 3.156604833 | 3.603738733 | 3.536084033 | 3.370190767 | 3.6702355   | 3.656339    | 3.184786    |
| "Hist1h3f"   | 2.3617313   | 2.3325992   | 2.2776816   | 2.2977476   | 2.556262    | 2.4310722   | 2.3555994   | 2.33852     |
| "Hist1h4a"   | 4.626124175 | 4.142432675 | 3.846368525 | 4.25834595  | 4.1502158   | 4.647218725 | 4.6170313   | 3.714922975 |
| "Hist2h2aa1" | 9.336124    | 9.331265    | 9.3608885   | 9.6751815   | 9.240763    | 9.164915    | 9.427979    | 9.3328355   |
| "Hist3h2a"   | 5.3365715   | 4.2405572   | 5.4537347   | 5.7115772   | 5.2876908   | 5.78788085  | 5.34070065  | 5.26840375  |
| "Hivep1"     | 6.908975    | 6.692275    | 6.6674185   | 7.042229    | 6.633063    | 6.698135    | 6.8623986   | 6.4651794   |
| "Hivep2"     | 6.3491702   | 4.49372805  | 4.29721235  | 5.12098175  | 4.2350453   | 4.48253385  | 4.1027391   | 4.3269039   |
| "Hk1"        | 5.445556    | 4.712794    | 6.03102     | 5.2494774   | 5.1898146   | 5.0554295   | 5.177263    | 5.3402767   |
| "Hk2"        | 6.304332    | 5.063084    | 6.8419247   | 6.1042423   | 4.921761    | 5.3721604   | 5.306125    | 5.535188    |
| "Hkdc1"      | 3.0179887   | 2.9900463   | 2.9665687   | 2.981871    | 3.011825    | 3.005261    | 3.0198386   | 3.0089889   |
| "Hlcs"       | 2.8808186   | 3.2527456   | 3.7343612   | 3.4043956   | 3.2724488   | 2.875445    | 3.5942626   | 3.303839    |
| "Hlf"        | 4.30699085  | 6.7391397   | 5.7759115   | 6.4396434   | 6.9427879   | 5.8945019   | 6.7369988   | 6.42228965  |
| "Hlft"       | 4.712212333 | 4.617827367 | 5.0117597   | 4.944515833 | 4.799984633 | 4.685686333 | 5.070497833 | 4.980134633 |
| "Hlk"        | 3.0158854   | 2.9856126   | 2.9790897   | 2.9610517   | 2.9976013   | 2.9916887   | 3.47183     | 2.9856346   |
| "Hmbx1"      | 3.1390749   | 3.1406566   | 3.06753525  | 2.96995875  | 3.1284465   | 3.13118985  | 3.0752241   | 3.1154965   |
| "Hmbs"       | 7.6788655   | 8.60563185  | 8.374678    | 8.3986605   | 8.61750885  | 8.5117225   | 8.5382728   | 8.6630875   |
| "Hmg20a"     | 4.52704085  | 5.33099385  | 5.2270031   | 5.2768303   | 5.4932633   | 5.60400365  | 5.3343001   | 5.44607335  |
| "Hmg20b"     | 2.4280047   | 2.4087448   | 2.3635592   | 2.378524    | 2.764923    | 2.4073544   | 2.371236    | 2.4012764   |
| "Hmga1"      | 5.5567346   | 6.0338297   | 5.4592285   | 5.514387    | 5.552214    | 5.546992    | 5.016374    | 5.882233    |
| "Hmga2"      | 2.5228672   | 2.500143    | 2.4696631   | 2.4905994   | 2.5182176   | 2.5178525   | 2.5116925   | 2.5268736   |
| "Hmgb2"      | 8.38454125  | 6.7486904   | 7.2052145   | 6.496908    | 6.589389    | 6.63059325  | 6.7685165   | 6.2293678   |
| "Hmgb3"      | 7.002486    | 7.7591887   | 7.3719068   | 7.1657066   | 7.2509494   | 7.2976227   | 7.1664863   | 7.279533    |
| "Hmgb4"      | 2.669745    | 2.647565    | 2.5316482   | 2.6106474   | 2.669384    | 2.6756926   | 2.6406112   | 2.6689553   |
| "Hmgcl"      | 11.986752   | 12.413021   | 12.260939   | 12.257598   | 12.526901   | 12.419673   | 12.191349   | 12.071534   |
| "Hmgcr"      | 6.06867375  | 5.7830386   | 6.50288675  | 5.7156845   | 4.83324695  | 4.4570304   | 5.1353482   | 6.0079055   |
| "Hmgcs1"     | 12.83844275 | 11.70142775 | 13.8161385  | 12.68181    | 10.89707975 | 9.684487675 | 12.588851   | 12.531544   |
| "Hmgcs2"     | 10.689393   | 11.881993   | 9.87276     | 11.0902795  | 12.523134   | 12.042282   | 11.584715   | 11.5375275  |
| "Hmgn1"      | 11.21471167 | 11.386307   | 11.60916233 | 11.463952   | 10.93602933 | 10.77095083 | 11.38607967 | 11.673873   |
| "Hmgn3"      | 3.933608    | 3.5186044   | 4.05265665  | 4.5950936   | 3.9697681   | 3.82778585  | 4.6679661   | 3.93147885  |
| "Hmgn5"      | 9.881142    | 10.156722   | 9.69746     | 9.863915    | 9.896765    | 9.927298    | 10.357542   | 10.233791   |
| "Hmgxb3"     | 4.196916    | 4.0788145   | 3.9384642   | 4.001351    | 4.0320854   | 4.0928545   | 4.034849    | 4.017826    |
| "Hmgxb4"     | 4.936841    | 5.6455865   | 5.667399    | 5.875241    | 5.556825    | 5.671724    | 5.8301673   | 5.6954904   |
| "Hmha1"      | 3.351304    | 2.9901307   | 3.051604    | 3.0802755   | 3.0630183   | 2.8619843   | 3.2894397   | 3.0297873   |
| "Hmmr"       | 2.6269759   | 2.60793675  | 2.551891875 | 2.584950225 | 2.709328175 | 2.6379949   | 2.6517286   | 2.63452125  |
| "Hmox1"      | 8.796326    | 6.535955    | 7.102526    | 7.330049    | 6.9066453   | 6.233032    | 5.828987    | 5.6235266   |
| "Hmox2"      | 10.080361   | 10.234955   | 10.218716   | 9.866334    | 9.903161    | 10.303696   | 9.629978    | 9.83709     |
| "Hn1"        | 6.5049018   | 6.0826024   | 7.093154133 | 6.468946733 | 6.49932     | 6.2479164   | 6.7427848   | 6.659625933 |
| "Hnf1b"      | 3.5812435   | 3.550498    | 3.4913027   | 3.535861    | 3.567496    | 3.5663345   | 3.570968    | 3.867919    |
| "Hnf4a"      | 9.066443125 | 8.745111625 | 8.0302784   | 8.113409425 | 8.7329347   | 9.090939775 | 8.66172495  | 8.62845165  |
| "Hnf4g"      | 2.7351913   | 2.7103934   | 2.5983853   | 2.6655395   | 2.7934227   | 2.7680662   | 2.7067938   | 2.74176     |
| "Hnmt"       | 7.934235    | 7.954685    | 8.31188     | 9.505747    | 8.500622    | 7.6149664   | 9.0018425   | 9.499994    |
| "Hnrrpa1"    | 8.1919057   | 7.94038128  | 7.53853894  | 7.36181448  | 7.50770414  | 7.85523656  | 7.34094876  | 7.58220134  |
| "Hnrrpa2b1"  | 10.6185685  | 10.53731275 | 10.80244525 | 10.433682   | 10.62769988 | 10.7629165  | 11.0569595  | 10.74345175 |
| "Hnrrpa3"    | 8.5827015   | 9.4588105   | 9.527059    | 9.108769    | 9.4528465   | 9.0919285   | 9.52108725  | 9.4267725   |
| "Hnrrpab"    | 8.495985957 | 8.551295329 | 8.208033729 | 8.065460343 | 8.411351257 | 8.340025443 | 8.203237171 | 8.260228114 |
| "Hnrrnpc"    | 9.025408    | 8.79870185  | 9.03171875  | 8.9185965   | 8.5700985   | 8.537934    | 8.9694675   | 8.64585835  |
| "Hnrrnpd"    | 9.844907    | 9.848852    | 9.644066    | 9.133769    | 9.790696    | 9.651447    | 9.334674    | 9.626751    |
| "Hnrrnpf"    | 8.976577    | 9.147327    | 9.112176    | 8.7874565   | 9.074957    | 9.294238    | 8.975929    | 9.07398     |
| "Hnrrnp1"    | 10.8517275  | 10.818154   | 10.601149   | 10.398738   | 10.784358   | 10.874047   | 10.781433   | 10.787538   |
| "Hnrrnp2"    | 9.962833    | 9.561181    | 9.766743    | 9.430874    | 9.796326    | 9.777047    | 10.130811   | 9.774497    |
| "Hnrrnp3"    | 7.7173333   | 7.9666624   | 7.9454417   | 8.535637    | 7.864003    | 8.388745    | 8.439138    | 8.48532     |
| "Hnrrnpk"    | 9.38520425  | 9.389369175 | 9.17801415  | 9.23533935  | 9.41039495  | 9.31170855  | 9.5535012   | 9.486971    |
| "Hnrrnpl"    | 8.458659    | 8.667278    | 8.400105    | 8.391208    | 8.685344    | 8.606007    | 8.962507    | 9.029595    |
| "Hnrrnpm"    | 8.385522    | 8.480482    | 8.543192    | 7.963693    | 8.587463    | 8.475811    | 8.621864    | 8.238054    |
| "Hnrrnpr"    | 8.157602333 | 7.7592628   | 7.710402833 | 7.8298625   | 7.780846667 | 7.96053     | 8.280718333 | 7.631356333 |
| "Hnrrnpu"    | 9.956256833 | 9.713684333 | 10.02864533 | 9.718907667 | 9.746941333 | 10.19926667 | 10.00679617 | 9.851494333 |
| "Hnrrnpul1"  | 8.234143    | 8.41355     | 8.4331      | 8.303931    | 8.1814785   | 8.182693    | 8.672635    | 8.156022    |
| "Hnrrnpul2"  | 7.46976545  | 7.6560527   | 7.61806485  | 7.62165645  | 7.7850145   | 7.9751185   | 7.63356635  | 7.71626465  |
| "Hnrrpdl"    | 8.6241109   | 8.64599845  | 7.932625483 | 7.899821083 | 8.376225667 | 8.41094075  | 8.234181617 | 8.546848883 |
| "Hnrrpdl1"   | 8.1383893   | 8.8717365   | 8.5497055   | 8.5887995   | 8.6705565   | 8.825663    | 8.7699865   | 8.69475475  |
| "Hoga1"      | 8.329767    | 9.256074    | 9.329827    | 9.455607    | 9.28254     | 8.488337    | 9.30704     | 9.385994    |
| "Homer1"     | 2.56163935  | 2.55297965  | 2.4763911   | 2.53189275  | 2.58811355  | 2.56605195  | 2.5659158   | 2.59711715  |
| "Homer2"     | 7.8956194   | 9.309425    | 8.110961    | 8.992175    | 9.518772    | 9.080962    | 8.946338    | 9.2410345   |
| "Hook2"      | 6.315204    | 6.3393784   | 5.176786    | 6.3025484   | 5.5302825   | 6.649912    | 6.0996056   | 7.188175    |
| "Hopx"       | 9.819572    | 11.3707665  | 10.322427   | 11.1733115  | 10.3058595  | 10.7533695  | 10.201499   | 10.289292   |
| "Hormad1"    | 3.6253116   | 3.70506     | 3.5334437   | 3.5452461   | 3.9157848   | 3.915662    | 3.681769    | 3.9574625   |

|            |             |             |             |             |             |             |             |             |
|------------|-------------|-------------|-------------|-------------|-------------|-------------|-------------|-------------|
| "Hoxa10"   | 2.4676208   | 2.4417746   | 2.351165    | 2.4035406   | 2.4641626   | 2.498569    | 2.4461944   | 2.4835784   |
| "Hoxa11as" | 2.5558074   | 2.532618    | 2.444012    | 2.4879932   | 2.5625665   | 2.5619802   | 2.5450454   | 2.532044    |
| "Hoxa2"    | 2.6723428   | 2.6534925   | 2.4665723   | 2.5749393   | 2.6951432   | 2.7295723   | 3.1553228   | 2.6428938   |
| "Hoxa3"    | 2.7674986   | 2.7474933   | 2.748315    | 2.6904414   | 2.7688812   | 2.7653599   | 2.74307855  | 2.7880058   |
| "Hoxa4"    | 2.777862    | 2.81421625  | 2.67860665  | 2.7069842   | 2.78883495  | 2.7819276   | 2.7468499   | 2.7848926   |
| "Hoxa5"    | 2.37692     | 2.3745048   | 2.2597446   | 2.3001795   | 2.359441    | 2.3583152   | 2.3666227   | 2.3425908   |
| "Hoxa9"    | 2.4104357   | 2.384263    | 2.3185139   | 2.3427036   | 2.41869     | 2.4011059   | 2.401394    | 2.3955936   |
| "Hoxb13"   | 2.6052856   | 2.5697012   | 2.5031908   | 2.5177581   | 2.599522    | 2.5988615   | 2.5752823   | 2.5925977   |
| "Hoxb4"    | 2.52154745  | 2.4907566   | 2.4226297   | 2.4989752   | 2.5805859   | 2.5158043   | 2.51276705  | 2.56161035  |
| "Hoxb5"    | 2.5748954   | 2.5500996   | 2.5064962   | 2.5340493   | 2.5722497   | 2.666271    | 2.564914    | 2.5793624   |
| "Hoxb9"    | 2.8600702   | 2.825199    | 2.7372055   | 2.8006394   | 2.8812473   | 2.8355792   | 2.8489988   | 2.8293555   |
| "Hoxc4"    | 2.8133943   | 2.7848792   | 2.7505813   | 2.7651389   | 2.794851    | 2.788557    | 2.8010855   | 2.7797594   |
| "Hoxc5"    | 2.5013652   | 2.471299    | 2.4083598   | 2.4561696   | 2.4950802   | 2.4921515   | 2.4849758   | 2.4768448   |
| "Hoxc6"    | 2.6185355   | 2.615398    | 2.507133    | 2.5917609   | 2.673639    | 2.6192727   | 2.6018558   | 2.623855    |
| "Hoxc8"    | 2.510108    | 2.483659    | 2.437132    | 2.4409323   | 2.508851    | 2.5092926   | 2.4899182   | 2.5065637   |
| "Hoxd12"   | 2.3899841   | 2.3580651   | 2.3157048   | 2.3185396   | 2.379706    | 2.373177    | 2.3784275   | 2.3651948   |
| "Hoxd8"    | 2.9419084   | 2.925363    | 2.8793955   | 2.8538537   | 3.0034156   | 2.9512699   | 2.87634     | 2.9717638   |
| "Hp"       | 14.996237   | 14.914676   | 15.086445   | 14.908385   | 14.957908   | 15.036463   | 14.528697   | 14.724311   |
| "Hp1bp3"   | 9.647409    | 10.053648   | 9.985717    | 10.040127   | 10.157158   | 10.073305   | 10.15498    | 10.2390375  |
| "Hpcal1"   | 7.8463984   | 7.6838064   | 8.126876    | 7.8353996   | 7.5435376   | 6.947221    | 7.4778876   | 7.3753357   |
| "Hpd"      | 13.766517   | 14.13276    | 13.754948   | 13.935223   | 14.324019   | 14.255349   | 14.174393   | 14.144609   |
| "Hpgd"     | 7.700219    | 7.9853815   | 8.7250145   | 9.2141419   | 8.29425675  | 7.73829375  | 9.087393    | 8.6685008   |
| "Hpgds"    | 2.3149      | 2.2783513   | 2.751217    | 2.2573514   | 2.300356    | 2.29        | 2.3021011   | 2.2861655   |
| "Hpn"      | 11.036982   | 11.290212   | 11.027852   | 11.154362   | 11.041752   | 11.39861    | 10.90241    | 11.248806   |
| "Hprt"     | 9.615765    | 10.103688   | 9.800431    | 9.636215    | 9.797405    | 9.872749    | 9.381918    | 9.672869    |
| "Hps1"     | 3.8329992   | 3.7995825   | 3.775766    | 3.7905178   | 3.8104122   | 3.8166654   | 3.825832    | 3.8050354   |
| "Hps3"     | 6.4674635   | 6.211584    | 6.9878097   | 6.559528    | 6.1602354   | 6.4257817   | 6.4576397   | 6.3427234   |
| "Hps4"     | 8.6493435   | 7.199308    | 6.9846997   | 7.51839     | 6.258515    | 8.099523    | 6.6426897   | 7.1160903   |
| "Hpx"      | 14.816031   | 14.72611    | 14.940861   | 14.864214   | 14.823345   | 14.972934   | 14.502268   | 14.698396   |
| "Hr"       | 3.808385    | 3.7751188   | 3.7153473   | 3.7419763   | 3.7509143   | 3.57193     | 3.774569    | 3.754318    |
| "Hras1"    | 6.7032595   | 6.8243757   | 6.6581233   | 6.5650032   | 6.69327665  | 6.7504888   | 6.4953005   | 6.98458335  |
| "Hrg"      | 13.311973   | 13.451564   | 13.381201   | 13.541939   | 13.4648695  | 13.318275   | 12.983522   | 13.335695   |
| "Hrh2"     | 2.9078162   | 2.8767302   | 2.838951    | 2.7936814   | 2.8963523   | 2.887539    | 2.898059    | 2.8893998   |
| "Hrh3"     | 2.470464    | 2.4581432   | 2.3862736   | 2.392565    | 2.4682689   | 2.4693048   | 2.469229    | 2.455645    |
| "Hrnr"     | 2.5990493   | 2.5756018   | 2.4909508   | 2.5295777   | 2.6026511   | 2.6112547   | 2.5839832   | 2.5978086   |
| "Hrsp12"   | 13.68543    | 13.41991    | 13.523422   | 13.827231   | 13.580526   | 13.189597   | 13.88245    | 13.587901   |
| "Hs1bp3"   | 2.9600689   | 3.5104458   | 3.5413462   | 3.8972493   | 3.375525    | 3.4304923   | 3.7796062   | 3.483635    |
| "Hs2st1"   | 5.9552917   | 6.03787965  | 5.9461514   | 5.9172507   | 5.882658    | 5.8950483   | 5.8150145   | 5.35430955  |
| "Hs3st3a1" | 2.4228091   | 2.3871891   | 2.3228557   | 2.349989    | 2.4097722   | 2.4055068   | 2.4040287   | 2.3951743   |
| "Hs3st3b1" | 2.7327      | 2.7136415   | 2.7071326   | 2.69617415  | 2.72397435  | 2.72507755  | 2.72026775  | 2.75180045  |
| "Hs6st1"   | 8.078787    | 8.303638    | 7.2821774   | 7.824569    | 8.226155    | 7.7434034   | 7.6050887   | 7.7931023   |
| "Hs6st2"   | 2.51804335  | 2.48520245  | 2.42073845  | 2.4420175   | 2.51052     | 2.5050847   | 2.498492    | 2.5012286   |
| "Hsbp1"    | 9.938561    | 9.941342    | 9.938255    | 10.170276   | 9.7883555   | 9.762169    | 9.994147    | 9.864443    |
| "Hscb"     | 4.1382475   | 3.6732082   | 3.621764    | 4.4336224   | 2.9340982   | 3.7250836   | 3.868928    | 4.161198    |
| "Hsd11b1"  | 12.9922695  | 13.251295   | 13.523317   | 13.572923   | 13.396404   | 12.558436   | 13.452997   | 13.412759   |
| "Hsd11b2"  | 2.372951    | 2.3433428   | 2.2537613   | 2.3215437   | 2.3766854   | 2.3701172   | 2.362792    | 2.3648725   |
| "Hsd17b1"  | 2.809864    | 2.7903028   | 2.7579908   | 2.774281    | 2.8276565   | 2.8005328   | 2.752514    | 2.794465    |
| "Hsd17b10" | 10.3827325  | 11.886822   | 10.37719725 | 10.7501045  | 11.77474825 | 11.5688205  | 10.6233115  | 10.553088   |
| "Hsd17b11" | 9.7160411   | 10.426051   | 9.785295    | 10.331315   | 10.836718   | 10.80573    | 10.436716   | 10.368745   |
| "Hsd17b12" | 9.9736145   | 10.6821255  | 10.8328445  | 10.7826325  | 10.071492   | 9.9202645   | 10.845308   | 10.97928275 |
| "Hsd17b13" | 3.1714904   | 3.2885792   | 3.085104    | 3.1199076   | 3.3169613   | 3.1460617   | 3.159532    | 3.1638613   |
| "Hsd17b2"  | 10.594232   | 12.286984   | 10.992195   | 11.312048   | 11.095005   | 11.010066   | 11.537149   | 11.59891    |
| "Hsd17b4"  | 10.963372   | 12.095801   | 11.183351   | 11.70812375 | 12.5204635  | 12.3520605  | 12.5978685  | 12.1757995  |
| "Hsd17b6"  | 9.290312    | 3.801543    | 10.754318   | 5.474915    | 9.906382    | 4.2387195   | 11.591611   | 10.358564   |
| "Hsd17b7"  | 9.2819985   | 9.406282    | 8.938414    | 8.1339355   | 7.64478825  | 6.77376465  | 6.96020575  | 7.66652     |
| "Hsd3b2"   | 4.4775596   | 5.47738505  | 6.460696    | 7.8236715   | 6.345268    | 4.72317705  | 7.3806887   | 8.3936858   |
| "Hsd3b3"   | 5.9132957   | 7.4355817   | 8.876171    | 9.577626    | 8.396488    | 6.112998    | 9.588789    | 10.247563   |
| "Hsd3b5"   | 2.2796338   | 3.2982588   | 2.1795878   | 2.2269402   | 2.2661088   | 2.2565775   | 2.2693775   | 6.2097445   |
| "Hsd3b7"   | 10.4179125  | 10.486814   | 12.051572   | 11.884719   | 11.814152   | 11.1744     | 12.6674385  | 12.045889   |
| "Hsd12"    | 8.6815675   | 9.1975785   | 7.9111445   | 8.08738625  | 9.6361055   | 10.2013425  | 9.64802     | 8.9445945   |
| "Hsf1"     | 5.130533    | 5.3841925   | 5.201132    | 5.08112     | 5.2987075   | 5.1078243   | 4.8401213   | 5.248338    |
| "Hsf2"     | 4.379535    | 4.454826    | 4.558803    | 4.6613603   | 5.047338    | 4.751393    | 6.1431746   | 5.4743037   |
| "Hsf4"     | 2.3947852   | 2.3634214   | 2.3445945   | 2.355814    | 2.3942115   | 2.388364    | 2.367368    | 2.3889422   |
| "Hsp90aa1" | 10.2614125  | 9.828496667 | 10.18334183 | 9.5995285   | 10.03590567 | 10.83427933 | 10.07906733 | 9.685983667 |
| "Hsp90ab1" | 12.064945   | 12.1429895  | 12.1537425  | 12.127777   | 12.3153025  | 12.554168   | 12.1944815  | 12.226956   |
| "Hsp90b1"  | 12.438445   | 12.345649   | 12.409247   | 12.29291    | 12.916302   | 12.907922   | 12.752702   | 12.759775   |
| "Hspa12b"  | 2.4429603   | 2.423417    | 2.3386161   | 2.3717346   | 2.4457219   | 2.4365506   | 2.417893    | 2.4416068   |
| "Hspa14"   | 5.4240915   | 5.6068698   | 5.46936105  | 5.585159    | 5.58982     | 5.5287695   | 5.7391575   | 5.6334505   |
| "Hspa1a"   | 2.6206007   | 2.5927896   | 2.5789874   | 2.515239    | 2.6139107   | 2.6355813   | 2.5736077   | 2.6408446   |
| "Hspa1b"   | 5.7842631   | 6.751824567 | 7.507966333 | 7.562449167 | 8.1159854   | 9.243984333 | 7.833105    | 7.885003967 |
| "Hspa1l"   | 2.372345    | 2.3417525   | 2.2973313   | 2.30551     | 2.3642154   | 2.3586917   | 2.3624191   | 2.3522325   |
| "Hspa2"    | 8.060657    | 5.505788    | 4.359561    | 4.4784193   | 4.514591    | 4.6626496   | 4.046398    | 4.389514    |
| "Hspa4"    | 8.242716667 | 8.156582167 | 8.263658667 | 8.336986567 | 8.2550114   | 8.809678667 | 8.597397667 | 8.1244513   |
| "Hspa4l"   | 6.79354165  | 5.7537615   | 6.73372225  | 7.12497355  | 6.3827467   | 6.59120845  | 7.2369756   | 6.875798    |
| "Hspa5"    | 13.212437   | 13.164467   | 13.1218405  | 12.551031   | 14.123712   | 13.709563   | 13.139126   | 13.120331   |
| "Hspa8"    | 10.93185618 | 11.33122558 | 11.42202563 | 11.17894575 | 11.57051088 | 12.15650825 | 11.3893735  | 11.441133   |
| "Hspa9"    | 8.4574866   | 8.426481333 | 8.266819433 | 8.261041    | 8.542900567 | 8.692580867 | 8.497870533 | 8.502913433 |
| "Hspb1"    | 7.999757    | 6.469264    | 5.072304    | 5.64670875  | 6.4132632   | 7.0605054   | 6.293269    | 6.8343811   |
| "Hspb11"   | 5.13876635  | 5.0976352   | 5.1803585   | 5.26321635  | 4.926829    | 5.1566503   | 5.2474307   | 5.4705075   |
| "Hspb2"    | 2.612722    | 2.5805154   | 2.569076    | 2.551108    | 2.6116195   | 2.5905874   | 2.601362    | 2.6054487   |
| "Hspb8"    | 7.898526667 | 6.9935202   | 6.91047     | 6.7641353   | 6.928752133 | 7.072278033 | 6.228138167 | 6.517963233 |

|            |             |             |             |             |             |             |             |             |
|------------|-------------|-------------|-------------|-------------|-------------|-------------|-------------|-------------|
| "Hspbp1"   | 4.998215    | 5.0657496   | 5.1305323   | 4.997815    | 5.0013156   | 5.033152    | 5.0540934   | 5.0267644   |
| "Hspd1"    | 12.737476   | 12.891606   | 12.566338   | 12.663967   | 12.828878   | 12.986038   | 12.6767645  | 12.967641   |
| "Hspe1"    | 10.6543745  | 10.874264   | 10.900086   | 10.774754   | 10.693316   | 11.091324   | 10.981622   | 10.9491715  |
| "Hspg2"    | 5.456565    | 5.378373    | 5.60280445  | 5.7055788   | 5.5528012   | 5.62356125  | 5.7913737   | 5.64945715  |
| "Hsph1"    | 7.3948695   | 6.2174435   | 7.21985     | 6.234041    | 7.65423865  | 8.6151915   | 7.05877535  | 6.91333075  |
| "Htatip2"  | 10.11653    | 10.581642   | 10.95608    | 10.289923   | 9.941379    | 9.647346    | 9.536193    | 9.1954155   |
| "Htatsf1"  | 5.7781027   | 6.3524996   | 5.679199433 | 6.028324867 | 5.956117433 | 5.7463124   | 5.779075    | 5.5142388   |
| "Htr1a"    | 2.4983473   | 2.4709084   | 2.4120748   | 2.4527254   | 2.4990168   | 2.4963613   | 2.4796166   | 2.4932847   |
| "Htr1b"    | 3.9938765   | 3.9940484   | 3.900757    | 3.9720736   | 4.110521    | 3.9702787   | 3.7590008   | 4.242448    |
| "Htr1f"    | 2.5529084   | 2.5237865   | 2.4476445   | 2.4742887   | 2.5625646   | 2.5564666   | 2.5338616   | 2.526032    |
| "Htr2c"    | 2.4071198   | 2.3742523   | 2.325496    | 2.3453214   | 2.3954623   | 2.3881626   | 2.3889923   | 2.3820205   |
| "Htra1"    | 5.0352294   | 3.91088175  | 4.54771375  | 5.26282865  | 4.3480116   | 5.05197525  | 5.15341355  | 4.6242858   |
| "Htra2"    | 5.91222455  | 5.85734635  | 5.9954725   | 5.647524    | 6.0605775   | 5.889931    | 6.03878285  | 5.81327815  |
| "Htra3"    | 3.7564309   | 4.042057    | 3.0301094   | 3.47841     | 3.6280541   | 4.8278418   | 3.1462362   | 2.9842353   |
| "Htt"      | 2.6766052   | 2.5415165   | 4.078397    | 3.300529    | 2.6707916   | 2.620621    | 3.0223718   | 2.6836786   |
| "Hunk"     | 2.9106708   | 2.878996    | 2.8539376   | 2.8870766   | 2.8960998   | 2.8920271   | 2.9008648   | 2.9443629   |
| "Hus1"     | 5.974077    | 5.5072393   | 5.242955    | 5.7716656   | 5.5032516   | 5.3255053   | 6.4266615   | 5.8823805   |
| "Huwe1"    | 4.949254833 | 5.2970097   | 5.1285516   | 5.1476863   | 5.377426567 | 5.07932433  | 5.2331191   | 5.364761033 |
| "Hvcn1"    | 2.4957852   | 2.5059128   | 2.5231938   | 2.7449873   | 2.5504289   | 2.5482757   | 2.8818274   | 2.7534652   |
| "Hyal1"    | 8.288415    | 8.469498    | 8.4329405   | 8.451355    | 8.862652    | 9.166861    | 8.660907    | 8.082145    |
| "Hyal2"    | 7.1722164   | 7.7651815   | 7.0419426   | 7.0861874   | 7.285481    | 7.8066816   | 6.966943    | 7.2105274   |
| "Hyi"      | 6.207017    | 6.785553    | 6.547115    | 6.5402875   | 6.8257284   | 6.3257647   | 6.7901635   | 7.2804537   |
| "Hyou1"    | 4.5398884   | 4.5549198   | 4.602863367 | 4.389551833 | 5.782085833 | 5.272394067 | 4.711081767 | 4.866247633 |
| "lah1"     | 12.273722   | 11.354875   | 11.699859   | 11.899149   | 11.890337   | 11.715682   | 12.199911   | 11.995644   |
| "lapp"     | 2.8441576   | 2.8523632   | 2.7772837   | 2.799245267 | 2.8998959   | 2.890181867 | 2.833115467 | 2.928160067 |
| "lars"     | 7.7659637   | 7.8815981   | 7.7982202   | 7.546895    | 8.19547     | 8.3759065   | 7.65160085  | 7.7614092   |
| "lars2"    | 7.8432508   | 8.09687     | 7.8613043   | 7.9647293   | 8.171925    | 8.16598     | 8.131069    | 8.233643    |
| "lbsp"     | 2.8913975   | 2.7859657   | 2.6830859   | 2.7246691   | 2.81808785  | 2.8112384   | 2.7666914   | 2.8140951   |
| "lbtkt"    | 7.270487    | 6.6756615   | 6.3420011   | 6.1014365   | 6.7533635   | 5.81875995  | 5.693346    | 5.9868068   |
| "lcal1"    | 2.58917745  | 2.56427565  | 2.5520554   | 2.5489124   | 2.5858452   | 2.5710142   | 2.5759879   | 2.57468245  |
| "lcam1"    | 10.430324   | 6.7289596   | 8.515426    | 8.811997    | 6.9486094   | 7.8143315   | 7.059583    | 7.241258    |
| "lcam2"    | 5.339181    | 4.6006317   | 5.6611347   | 5.4992056   | 5.220026    | 4.4077864   | 5.825604    | 5.1597114   |
| "lck"      | 2.291005    | 2.2529144   | 2.9089067   | 2.5340648   | 2.437715    | 2.4086845   | 2.4488733   | 2.473258    |
| "lcm1"     | 6.180168    | 6.3856587   | 5.783252    | 6.0071797   | 6.4951477   | 6.3168726   | 6.1517596   | 6.0509577   |
| "lcos"     | 2.42407     | 2.49185885  | 2.98896515  | 2.5816311   | 2.9317274   | 2.24219835  | 2.7463762   | 2.5910132   |
| "lcosl"    | 2.4757847   | 2.4096498   | 2.6940087   | 2.4673055   | 2.4609431   | 2.46371695  | 2.79045525  | 2.437428    |
| "lct1"     | 9.1600065   | 9.680102    | 9.597307    | 9.407702    | 9.633518    | 9.632135    | 9.642621    | 9.711049    |
| "ld1"      | 8.229249    | 6.4867096   | 7.847529    | 6.384924    | 7.600915    | 7.989359    | 9.482899    | 6.819079    |
| "ld2"      | 9.013224133 | 7.555574167 | 8.334528967 | 8.336575467 | 8.101738    | 8.214835667 | 9.197302433 | 8.591893667 |
| "ld3"      | 10.367826   | 7.9803777   | 9.196073    | 8.929825    | 8.932865    | 8.863203    | 9.262169    | 8.825016    |
| "ld4"      | 4.76694315  | 3.771274    | 3.6364326   | 3.858788    | 3.7790999   | 3.89479075  | 4.659276    | 3.8153185   |
| "lde"      | 5.923571425 | 6.544156425 | 6.3458192   | 6.455424875 | 6.900782075 | 6.58195545  | 6.53701025  | 6.5988139   |
| "ldh1"     | 10.9303945  | 11.517902   | 12.120176   | 12.142006   | 12.144374   | 11.4311485  | 12.690369   | 12.482145   |
| "ldh2"     | 7.531828    | 7.6495667   | 8.548289    | 8.47439     | 8.186286    | 7.7661977   | 8.466144    | 8.239558    |
| "ldh3a"    | 5.913658667 | 6.531694633 | 5.679787133 | 5.7232202   | 6.386600633 | 5.8994745   | 5.7438614   | 5.833580333 |
| "ldh3b"    | 11.102046   | 11.2423705  | 10.963662   | 11.0927785  | 11.285095   | 11.220558   | 11.316705   | 11.3366045  |
| "ldh3g"    | 9.7603565   | 10.337991   | 9.813618    | 9.9715355   | 10.267976   | 9.953751    | 9.952131    | 10.1411455  |
| "ldnk"     | 9.014678    | 8.804906    | 9.639201    | 9.389669    | 8.642411    | 8.2711525   | 9.107141    | 9.243623    |
| "ldo2"     | 4.506722    | 5.057905    | 5.813139    | 5.9569163   | 4.783897    | 4.8319182   | 5.4764495   | 4.871148    |
| "lds"      | 2.6760834   | 2.667524625 | 2.599209    | 2.6041326   | 2.707236575 | 2.673651725 | 2.7127254   | 2.71714535  |
| "ldua"     | 3.433074433 | 3.253084833 | 3.4619285   | 3.843508867 | 3.793826167 | 3.281110467 | 3.536640267 | 3.5828898   |
| "ler2"     | 9.980615    | 7.6939926   | 7.6461906   | 7.9492364   | 7.561424    | 8.134295    | 8.994804    | 8.144165    |
| "ler3"     | 7.970501    | 4.9616995   | 8.256691    | 6.591625    | 4.236904    | 5.584126    | 4.526597    | 5.613115    |
| "ler3ip1"  | 8.2549405   | 8.1424047   | 7.9697848   | 7.8395915   | 7.892849    | 7.58315785  | 7.8462755   | 7.939365    |
| "ler5"     | 4.228043467 | 3.5021675   | 4.152569733 | 3.95631     | 3.7032216   | 3.902253    | 3.990029    | 3.693378    |
| "lffo1"    | 2.7299244   | 2.274869    | 2.4902189   | 1.9848477   | 2.4941657   | 2.6013706   | 2.2974038   | 2.3777723   |
| "lffo2"    | 6.2877455   | 5.7711167   | 4.8918514   | 6.5274696   | 6.8442326   | 5.795434    | 6.3631663   | 6.545495    |
| "lfi202b"  | 2.7467613   | 2.7179327   | 2.6115289   | 2.681231    | 2.7596374   | 2.7569113   | 2.7249918   | 2.7488585   |
| "lfi204"   | 8.1230115   | 6.21982935  | 7.93079265  | 7.6426153   | 6.7143115   | 6.7536085   | 8.049615    | 6.85737775  |
| "lfi205"   | 9.700417    | 7.8297157   | 10.201538   | 9.660402    | 7.9593034   | 8.053871    | 9.599907    | 8.557037    |
| "lfi2712a" | 9.72462     | 6.4399652   | 10.398008   | 9.433648    | 7.6524596   | 6.5640483   | 9.280086    | 8.423196    |
| "lfi2712b" | 5.475944    | 4.762225    | 8.471621    | 6.0015187   | 5.6789017   | 4.7414646   | 6.844916    | 5.655362    |
| "lfi30"    | 10.840527   | 9.0440035   | 10.755337   | 10.023109   | 9.175518    | 8.847612    | 9.441923    | 9.189314    |
| "lfi35"    | 6.992163    | 7.6177106   | 7.8603654   | 7.7467003   | 7.114219    | 7.285379    | 7.057641    | 7.3528857   |
| "lfi44"    | 5.304921    | 2.9665294   | 8.072018    | 6.2357063   | 4.1151223   | 3.4245453   | 5.475894    | 4.6035357   |
| "lfi47"    | 8.805788    | 8.505639    | 10.749114   | 9.923264    | 8.454139    | 7.6254177   | 9.193254    | 9.299214    |
| "lfihi1"   | 8.982728    | 8.682875    | 10.870792   | 10.735213   | 9.216075    | 8.754577    | 9.892692    | 9.714215    |
| "lfit1"    | 6.3102684   | 6.469082    | 10.380644   | 9.905964    | 5.5395365   | 5.528276    | 6.8451867   | 6.4291587   |
| "lfit2"    | 7.410817    | 4.4265776   | 8.652904    | 7.846727    | 5.750341    | 5.0958047   | 7.4100065   | 6.824504    |
| "lfit3"    | 8.284914    | 6.495468    | 9.673162    | 9.651105    | 6.7877574   | 6.2951965   | 8.076018    | 7.524106    |
| "lfitm1"   | 9.024591    | 7.346821    | 8.761012    | 7.877436    | 7.520926    | 7.5391717   | 8.042743    | 7.418556    |
| "lfitm2"   | 11.691072   | 10.617653   | 11.79156    | 10.945699   | 10.656271   | 10.549451   | 10.414515   | 10.680683   |
| "lfitm3"   | 12.985658   | 12.599228   | 13.535343   | 13.387684   | 12.457495   | 12.129938   | 12.691582   | 13.103043   |
| "lfitm6"   | 7.967044    | 5.029041    | 7.589116    | 5.615632    | 6.415565    | 5.569654    | 5.314259    | 3.052701    |
| "lfn1"     | 3.3753638   | 3.3649645   | 3.254544    | 3.7026482   | 3.495977    | 3.3569074   | 3.3895695   | 3.3705506   |
| "lfn2"     | 3.340803    | 3.304263    | 3.2869775   | 3.3219547   | 3.8831587   | 3.3509123   | 3.2045205   | 3.3578856   |
| "lfn5"     | 2.441814    | 2.4085698   | 2.352299    | 2.3819985   | 2.4348097   | 2.429876    | 2.4200706   | 2.426513    |
| "lfn9"     | 2.6438868   | 2.6175303   | 2.5248034   | 2.5644555   | 2.6447618   | 2.6419988   | 2.6248732   | 2.6389923   |
| "lfnab"    | 2.556271    | 2.5218484   | 2.4937317   | 2.4800794   | 2.5493138   | 2.5389163   | 2.532568    | 2.5351107   |
| "lfnar1"   | 7.0458064   | 7.083954    | 7.119467    | 7.369849    | 7.165497    | 7.1832848   | 6.962534    | 7.2516327   |
| "lfnar2"   | 7.9953833   | 7.93216165  | 8.73499     | 8.3687145   | 7.7969785   | 8.059084    | 7.7924105   | 7.795043    |

|              |             |             |             |             |             |             |             |             |
|--------------|-------------|-------------|-------------|-------------|-------------|-------------|-------------|-------------|
| "lfng"       | 2.4682207   | 2.4358294   | 2.3750525   | 2.422998    | 2.4563498   | 2.4518793   | 2.4459188   | 2.4442935   |
| "lfngr1"     | 8.341228    | 7.133992    | 7.9618187   | 7.408873    | 7.5496354   | 7.6193275   | 7.750414    | 7.2110057   |
| "lfngr2"     | 5.1523831   | 5.047206    | 5.1665094   | 5.32397845  | 4.71776175  | 4.70140625  | 4.90698315  | 5.0441558   |
| "lfrd1"      | 11.869616   | 8.922522    | 7.0584536   | 7.650788    | 7.936281    | 9.429628    | 6.9046206   | 7.9669237   |
| "lfrd2"      | 6.675518    | 6.9275665   | 6.954864    | 6.9466343   | 6.929487    | 8.106442    | 6.909006    | 7.073715    |
| "lft140"     | 4.5548573   | 4.436988    | 5.4270296   | 5.076046    | 4.8060436   | 4.9545584   | 4.878875    | 5.006424    |
| "lft172"     | 4.565505    | 3.8787196   | 4.677371    | 4.916292    | 4.2876215   | 4.235595    | 5.349993    | 5.026902    |
| "lft20"      | 8.222424    | 8.409524    | 8.219406    | 8.358863    | 8.517527    | 8.593842    | 8.318481    | 8.371245    |
| "lft27"      | 5.596221767 | 5.6717225   | 6.436758467 | 6.2941462   | 5.8406763   | 5.7779662   | 6.403031533 | 6.546802667 |
| "lft46"      | 7.3446937   | 7.3120465   | 6.661498    | 7.280794    | 6.7020307   | 6.9749722   | 6.897118    | 7.3333526   |
| "lft57"      | 4.0602036   | 2.8009722   | 4.028899    | 2.6236353   | 2.6895237   | 2.8091176   | 2.8200116   | 2.5080318   |
| "lft74"      | 6.0701313   | 5.542348    | 5.7799635   | 5.587207    | 5.4557753   | 6.0750046   | 5.481264    | 5.7980833   |
| "lft80"      | 2.9905875   | 2.8839054   | 2.98916285  | 3.30008915  | 3.2645634   | 3.1184976   | 3.49698825  | 3.1356547   |
| "lft81"      | 4.974793    | 3.4425259   | 3.9068794   | 4.182834    | 3.5025487   | 4.238099    | 4.1648273   | 3.9665158   |
| "lft88"      | 4.2057343   | 4.8631988   | 4.579331    | 4.4221992   | 4.481194    | 4.639696    | 4.4794507   | 4.889202    |
| "lgbp1"      | 6.185429725 | 6.233958275 | 5.91081195  | 5.846453325 | 6.131732875 | 6.2040325   | 5.9295695   | 5.947784975 |
| "lgdcc3"     | 2.4331753   | 2.3958564   | 2.3135865   | 2.386744    | 2.415841    | 2.4077106   | 2.417898    | 2.4014087   |
| "lgdcc4"     | 2.85685145  | 2.85321865  | 2.81282375  | 2.82417635  | 2.8662688   | 2.861646    | 2.8504705   | 2.85680415  |
| "lgf1"       | 12.05581233 | 12.44542533 | 11.42753733 | 11.98622967 | 11.98303683 | 12.27537533 | 12.04417633 | 12.00401767 |
| "lgf1r"      | 3.0723375   | 3.0354032   | 2.9970324   | 3.026742    | 3.06329215  | 3.0965826   | 3.020097    | 3.08296165  |
| "lgf2"       | 2.58598     | 2.5578787   | 2.477824    | 2.5178988   | 2.5845778   | 2.5758214   | 2.5647001   | 2.57894     |
| "lgf2bp1"    | 2.603445    | 2.5740194   | 2.5234299   | 2.5387282   | 2.605085    | 2.6184464   | 2.5917566   | 2.6177425   |
| "lgf2bp2"    | 2.8302903   | 2.7843564   | 2.7610247   | 2.783443    | 2.8473012   | 2.8974683   | 2.9358542   | 2.8165765   |
| "lgf2bp3"    | 2.56055025  | 2.54590935  | 2.44732605  | 2.493105125 | 2.565033875 | 2.56742635  | 2.542748375 | 2.5617914   |
| "lgf2r"      | 5.41436     | 6.36367     | 6.97941425  | 6.82944035  | 6.7905785   | 6.46688175  | 6.6019814   | 6.8961079   |
| "lgfals"     | 6.6245046   | 7.5433435   | 7.4968467   | 7.8125515   | 8.088839    | 7.7803907   | 7.9614186   | 7.8419447   |
| "lgfbp1"     | 15.205503   | 14.056086   | 13.502662   | 12.680222   | 12.017022   | 14.583903   | 12.49163    | 10.674288   |
| "lgfbp2"     | 10.180398   | 10.378093   | 9.892204    | 9.981275    | 11.122649   | 10.77637    | 11.347983   | 12.103369   |
| "lgfbp3"     | 9.28118     | 8.923193    | 8.680675    | 8.5392475   | 8.823011    | 9.871144    | 9.344697    | 8.386703    |
| "lgfbp4"     | 10.22441138 | 10.91307138 | 10.1754799  | 10.83063027 | 10.72318918 | 10.62256783 | 10.28858933 | 10.63571155 |
| "lgfbp5"     | 6.911623    | 7.2803583   | 7.449825    | 8.317255    | 7.0209618   | 5.9971185   | 7.117191    | 6.9558945   |
| "lgfbp6"     | 2.6872895   | 2.5546255   | 2.2842999   | 2.2876558   | 2.3398597   | 2.2233636   | 2.338528    | 2.3144338   |
| "lgfbp7"     | 8.03213985  | 7.60837005  | 7.795087    | 8.0353385   | 8.0950652   | 7.9710188   | 8.2396935   | 7.9275132   |
| "lgfbpl1"    | 2.371613    | 2.3382516   | 2.304979    | 2.321292    | 2.3578508   | 2.3493848   | 2.35946     | 2.3432817   |
| "lgh-VJ558"  | 4.499420513 | 3.69926425  | 5.1094968   | 4.151396938 | 4.504066075 | 4.44940915  | 4.946412    | 3.99426905  |
| "lghg"       | 3.15434435  | 2.82004325  | 3.64751165  | 2.79026985  | 2.8495749   | 2.84687315  | 3.53666105  | 3.0215249   |
| "lghg3"      | 2.9824699   | 2.9880735   | 2.894388    | 2.9109033   | 2.9973991   | 3.0074582   | 2.9348026   | 3.0053736   |
| "lghm"       | 3.369066213 | 3.135932888 | 3.908459863 | 3.566139788 | 3.423302863 | 3.360435063 | 3.7523727   | 3.4410844   |
| "lghmbp2"    | 2.727741533 | 2.749987467 | 2.6870998   | 2.673023667 | 2.7166362   | 2.7506533   | 2.7154929   | 2.7019156   |
| "lghv14-2"   | 3.144136    | 3.4797535   | 5.71049     | 4.2494416   | 4.0940695   | 3.555604    | 5.0632973   | 3.8872845   |
| "lgi"        | 4.926247    | 2.7590625   | 6.387407    | 4.434263    | 4.670286    | 4.1886873   | 6.496741    | 3.987647    |
| "lgk-V1"     | 2.4867914   | 2.4626307   | 2.458948    | 2.4253845   | 2.5531685   | 2.4747388   | 2.532671    | 2.4894125   |
| "lgk-V21"    | 2.6108947   | 2.5846906   | 2.4532912   | 2.5148475   | 2.6421094   | 2.6411386   | 2.5763884   | 2.6427588   |
| "lgk-V28"    | 5.83238888  | 4.38155818  | 6.78082908  | 5.61224322  | 5.81246326  | 5.6214403   | 6.6437281   | 5.34714864  |
| "lgk"        | 2.48969375  | 2.4498407   | 2.4222071   | 2.4419676   | 2.48214995  | 2.47477925  | 2.6196511   | 2.46917825  |
| "lgkv1-117"  | 2.6784523   | 2.6620877   | 2.5487568   | 2.6358411   | 2.6842663   | 2.6830103   | 2.6541193   | 2.6802177   |
| "lgkv14-111" | 2.6795726   | 2.6749902   | 2.57764     | 2.629217    | 2.6945534   | 2.7000065   | 2.6977463   | 2.6887212   |
| "lgkv15-103" | 2.558271    | 2.5255067   | 2.4506786   | 2.4844236   | 2.54463     | 2.5417786   | 2.5450678   | 2.537004    |
| "lgkv19-93"  | 2.4935904   | 2.4662826   | 2.5451672   | 2.4595838   | 2.5047607   | 2.6374483   | 2.487646    | 2.4911556   |
| "lgkv4-68"   | 2.4736788   | 2.444478    | 2.3877385   | 2.4109805   | 2.470697    | 2.4676094   | 2.4605668   | 2.4606192   |
| "lgkv4-72"   | 2.6182275   | 2.5969477   | 2.4639068   | 2.5136018   | 2.6526406   | 2.64439     | 2.586538    | 2.5935197   |
| "lgkv5-39"   | 2.7970521   | 2.7737262   | 2.6873727   | 2.724224    | 2.8155022   | 2.8452787   | 2.766076    | 2.812377    |
| "lgkv6-14"   | 2.492509    | 2.472928    | 2.3831198   | 2.417516    | 2.501048    | 2.4973154   | 2.479628    | 2.505779    |
| "lgkv6-15"   | 2.4522111   | 2.4191563   | 2.3645678   | 2.3647885   | 2.437268    | 2.4337893   | 2.4304404   | 2.4272952   |
| "lgkv6-20"   | 2.4271054   | 2.3987086   | 2.346732    | 2.3759353   | 2.4198499   | 2.415927    | 2.4148767   | 2.4083645   |
| "lgkv8-30"   | 6.2547903   | 5.964419    | 7.461787    | 6.155652    | 6.2237854   | 6.225895    | 7.6132197   | 6.0244937   |
| "lgkv9-120"  | 2.9147196   | 2.904605    | 2.800436    | 2.8214738   | 2.9549532   | 2.9524264   | 2.8989477   | 2.9548116   |
| "lglc1"      | 3.0042243   | 2.9977539   | 2.99175     | 3.7994623   | 3.1036081   | 3.0380368   | 3.0509448   | 3.031136    |
| "lgl11"      | 2.5576303   | 2.5248787   | 2.4427743   | 2.4781535   | 2.5511267   | 2.5523114   | 2.3829598   | 2.5429523   |
| "lglv1"      | 2.7078866   | 2.6801864   | 2.622982    | 3.14430485  | 2.7122369   | 2.72698855  | 2.86426685  | 2.712096    |
| "lgsf5"      | 7.3157225   | 8.354145    | 8.213671    | 8.045164    | 7.9191055   | 7.984776    | 8.366743    | 8.705147    |
| "lgsf6"      | 8.464645    | 7.2052193   | 8.314874    | 7.706886    | 7.518864    | 7.3724904   | 7.3316364   | 7.087908    |
| "lgsf8"      | 3.550345    | 3.2238193   | 3.578667    | 3.4275954   | 3.4358647   | 3.4528801   | 3.4215372   | 3.957831    |
| "lgtp"       | 8.946358    | 8.675899    | 11.302227   | 10.631104   | 9.736378    | 8.8604145   | 9.892515    | 9.593388    |
| "ligp1"      | 12.08969175 | 11.881577   | 13.205025   | 13.2194925  | 12.3354975  | 12.112364   | 13.128556   | 13.0832635  |
| "ligp1b"     | 2.7004035   | 2.7032113   | 2.653261    | 2.643907    | 2.7019527   | 2.696431    | 2.7053666   | 2.7246811   |
| "lk"         | 10.6763305  | 10.17976675 | 9.91408475  | 9.69203125  | 10.12581175 | 9.88595775  | 9.9825215   | 9.922712    |
| "lkbip"      | 3.626622    | 3.746997    | 4.259933    | 3.6307108   | 3.8240006   | 3.801518    | 4.462718    | 4.045509    |
| "lkbkap"     | 5.346664    | 5.3407252   | 5.31727325  | 5.2091624   | 5.2243182   | 5.46700985  | 5.2489865   | 5.1919621   |
| "lkbkb"      | 4.293187725 | 4.228616725 | 4.48074365  | 4.485823225 | 4.33832615  | 4.247281525 | 4.418020875 | 4.37829645  |
| "lkbke"      | 7.224723    | 6.191476    | 8.981592    | 8.4986827   | 7.3797646   | 6.380414    | 7.2764616   | 7.206021    |
| "lkbkg"      | 4.24627075  | 5.22775755  | 5.131840175 | 4.91521095  | 5.11694245  | 4.999775125 | 5.029243475 | 5.045907375 |
| "lkzf4"      | 2.1639915   | 3.3565133   | 2.0770607   | 2.1006916   | 2.1764042   | 2.4868095   | 2.1435838   | 2.125637    |
| "l110"       | 6.070537    | 2.1380682   | 2.1056669   | 2.1160624   | 2.1605303   | 2.1511893   | 2.1611116   | 2.1449618   |
| "l110ra"     | 2.641644467 | 2.6404731   | 3.0839808   | 2.896177133 | 2.687129367 | 2.6546302   | 2.891703033 | 2.721881833 |
| "l110rb"     | 8.333528    | 7.2681346   | 9.079155    | 8.600925    | 7.96618     | 8.006766    | 8.420407    | 8.130216    |
| "l111"       | 2.6517878   | 2.619288    | 2.5677416   | 2.5989845   | 2.6393132   | 2.663432    | 2.5885193   | 2.6690347   |
| "l112a"      | 2.384299    | 2.3555834   | 2.3051848   | 2.3349254   | 2.377102    | 2.3671205   | 2.3691156   | 2.361994    |
| "l112b"      | 2.51549315  | 2.5171292   | 2.492735    | 2.474514    | 2.52501865  | 2.51517     | 2.52464815  | 2.53610255  |
| "l112rb1"    | 2.2418933   | 2.3058774   | 2.190343    | 2.2288046   | 2.4165654   | 2.2901511   | 2.241127    | 2.2483525   |
| "l113"       | 2.5803895   | 2.540963    | 2.577551    | 2.529294    | 2.574365    | 2.5710258   | 2.5553637   | 2.5451314   |

|          |             |             |             |             |             |             |             |             |
|----------|-------------|-------------|-------------|-------------|-------------|-------------|-------------|-------------|
| "I13ra1" | 6.67083006  | 5.56174508  | 6.73838222  | 6.28192732  | 5.69623474  | 5.65311466  | 6.24210218  | 6.263143    |
| "I13ra2" | 2.9820511   | 2.8317466   | 2.8041267   | 3.2556024   | 3.1860602   | 2.844384    | 2.9698164   | 3.0999875   |
| "I15"    | 3.2920737   | 2.9119077   | 4.6357064   | 5.482273    | 3.4413333   | 2.6425147   | 5.118223    | 3.9301147   |
| "I15ra"  | 5.511017    | 6.82871915  | 5.9848864   | 6.8318654   | 7.076781    | 6.93436275  | 6.50614835  | 7.2561365   |
| "I16"    | 3.74709675  | 4.2997962   | 4.7108006   | 4.71060765  | 4.5337852   | 4.41676525  | 4.51337225  | 3.9640435   |
| "I17a"   | 2.3980365   | 2.3628259   | 2.2981145   | 2.3436983   | 2.3862321   | 2.36961     | 2.3840396   | 2.3738925   |
| "I17d"   | 3.1786985   | 3.212432    | 2.98281     | 3.064543    | 3.2591193   | 3.2474458   | 3.1065211   | 3.3052602   |
| "I17ra"  | 8.5876158   | 6.2197973   | 8.2640545   | 8.141446    | 6.20164475  | 7.094971    | 6.96318835  | 7.6306735   |
| "I17rb"  | 5.96054     | 5.3768625   | 5.4269495   | 5.832951    | 4.887215    | 4.33697     | 4.460039    | 5.120618    |
| "I17rc"  | 5.1289725   | 5.6263113   | 5.4712806   | 5.4258323   | 5.397233    | 5.778868    | 5.450273    | 5.3396225   |
| "I18"    | 8.667708    | 7.4550333   | 9.507221    | 9.302594    | 8.1000185   | 7.763698    | 8.872672    | 8.985906    |
| "I18bp"  | 7.8621297   | 6.840354    | 8.986762    | 7.9996104   | 6.8587446   | 6.585722    | 7.116723    | 6.9704237   |
| "I18r1"  | 2.4372058   | 2.2224793   | 2.4202623   | 2.275031    | 2.3322911   | 2.3242183   | 2.3371062   | 2.3201652   |
| "I1a"    | 4.6566544   | 3.9404688   | 5.1214986   | 4.4187636   | 3.9488103   | 3.3781638   | 4.24264     | 4.2232585   |
| "I1b"    | 5.6003375   | 4.7008944   | 8.38883     | 7.068824    | 3.7793837   | 4.979396    | 5.4327817   | 6.636476    |
| "I1f10"  | 2.6612105   | 2.6348891   | 2.609231    | 2.625271    | 2.6612191   | 2.6640313   | 2.6378157   | 2.659795    |
| "I1f5"   | 2.4244947   | 2.3911443   | 2.3478646   | 2.3507571   | 2.4223819   | 2.4338355   | 2.3717456   | 2.411215    |
| "I1f9"   | 2.1813016   | 2.1441364   | 2.1131754   | 2.1263924   | 2.4113293   | 2.1535187   | 2.1663742   | 2.1489573   |
| "I1r1"   | 9.586403    | 9.75335     | 8.781998    | 8.005805    | 8.949236    | 9.431032    | 7.98117     | 8.759733    |
| "I1r2"   | 6.10065     | 3.0900877   | 3.8733435   | 3.0816996   | 3.107197    | 3.0854588   | 2.968877    | 3.0975928   |
| "I1rap"  | 5.4568934   | 5.570073967 | 5.783285567 | 5.945508033 | 5.913878167 | 6.145450167 | 5.903629067 | 6.460477967 |
| "I1rn"   | 6.7122219   | 3.2496583   | 6.675169667 | 5.875300767 | 3.945280133 | 5.049417467 | 4.929394133 | 4.439001233 |
| "I2"     | 2.4344692   | 2.4067287   | 2.3530445   | 2.3777168   | 2.4472694   | 2.4243488   | 2.4238625   | 2.419876    |
| "I21"    | 2.4390676   | 2.406275    | 2.3629897   | 2.3657365   | 2.4301534   | 2.426659    | 2.4230142   | 2.4159732   |
| "I22"    | 2.7017035   | 2.6749685   | 2.604026    | 2.620786    | 2.7712255   | 2.7047849   | 2.6815333   | 2.7026188   |
| "I23a"   | 2.7722454   | 2.7869658   | 2.7009892   | 2.673379    | 2.7769728   | 2.7743995   | 2.7328148   | 2.7730684   |
| "I27ra"  | 2.4322844   | 2.3982701   | 2.3531985   | 2.3692203   | 2.4182656   | 2.4069688   | 2.4214826   | 2.412884    |
| "I2ra"   | 2.4056723   | 2.379541    | 2.3324943   | 2.3677125   | 2.401798    | 2.3952115   | 2.4006727   | 2.3890898   |
| "I2rb"   | 2.3813682   | 2.3404121   | 2.3576999   | 2.3418891   | 2.3749347   | 2.4255426   | 2.3837996   | 2.36384     |
| "I2rg"   | 5.9386952   | 4.0080482   | 6.143942    | 5.5085576   | 4.6668359   | 4.1244241   | 5.30182765  | 5.01761765  |
| "I33"    | 3.3008242   | 3.2509866   | 3.7454567   | 3.7563086   | 3.3523052   | 3.094392    | 3.7955115   | 3.2976837   |
| "I34"    | 2.8720076   | 2.8438346   | 2.7985015   | 2.8188229   | 2.8627343   | 2.8586853   | 2.8007667   | 2.8589714   |
| "I3ra"   | 2.877494    | 2.517302    | 2.4945679   | 2.5091724   | 2.539331    | 2.5316882   | 2.5473895   | 2.526494    |
| "I4i1"   | 2.8296053   | 2.8331761   | 3.2583807   | 2.7413442   | 2.8270237   | 2.8184495   | 2.816155    | 2.8222978   |
| "I4ra"   | 7.004749    | 5.7366037   | 6.548679    | 5.759931    | 5.802804    | 5.7802835   | 5.753371    | 5.748569    |
| "I5ra"   | 2.5600524   | 2.5296597   | 2.4617598   | 2.4786959   | 2.5501218   | 2.5520623   | 2.539289    | 2.5519307   |
| "I6ra"   | 6.4643219   | 6.70027105  | 5.9423015   | 6.0434355   | 6.6125112   | 6.64146485  | 6.13160165  | 5.956815    |
| "I6st"   | 6.071822633 | 5.261997333 | 5.7582279   | 5.647134533 | 5.6546107   | 5.5260138   | 5.463014233 | 5.554257933 |
| "I7"     | 2.6933608   | 2.67478445  | 2.7585635   | 3.55689035  | 2.87580405  | 2.80201365  | 2.8626641   | 2.7053622   |
| "I7r"    | 2.8931251   | 2.7401475   | 2.6065452   | 2.68732595  | 3.1807115   | 2.75891835  | 2.76078275  | 2.68777575  |
| "I9"     | 2.4889941   | 2.525794    | 2.4052706   | 2.4407125   | 2.4791055   | 2.4727273   | 2.4775224   | 2.4639604   |
| "Ildr1"  | 2.4016309   | 2.3821723   | 2.3017707   | 2.3384688   | 2.3981905   | 2.3925781   | 2.391214    | 2.3878999   |
| "If2"    | 5.4586705   | 5.3346741   | 5.10523325  | 5.18573355  | 5.373155    | 5.327111    | 5.36978145  | 5.58922925  |
| "If3"    | 3.8894788   | 3.793185833 | 3.988312633 | 3.839158    | 3.7945292   | 3.887216333 | 3.716352533 | 3.849085833 |
| "Ik"     | 7.035764    | 7.482606    | 7.139793    | 7.658413    | 7.588126    | 7.401683    | 7.3036017   | 7.702487    |
| "Ikcap"  | 7.0310509   | 7.11996035  | 6.9166274   | 6.8499633   | 6.8670665   | 7.04929565  | 6.8675543   | 7.03225515  |
| "Immp11" | 9.008312    | 9.054935    | 9.538624    | 9.543011    | 9.199263    | 9.398771    | 9.683816    | 9.624592    |
| "Immp21" | 8.671671    | 9.219994    | 8.994153    | 9.643576    | 9.120026    | 8.8320265   | 9.280406    | 9.488485    |
| "Immt"   | 6.2577441   | 7.046137667 | 6.740914567 | 7.089470933 | 7.051432467 | 6.707829567 | 6.755804433 | 6.9039544   |
| "Imp3"   | 9.659923    | 9.74896     | 8.967803    | 9.164573    | 9.3056135   | 9.60846     | 9.177226    | 9.230954    |
| "Imp4"   | 4.83509235  | 4.72519785  | 4.8906369   | 4.5986416   | 4.93530485  | 4.79682375  | 4.81726455  | 4.7213998   |
| "Impa1"  | 9.2678755   | 9.11164     | 9.984848    | 10.1429155  | 9.8350715   | 9.873177    | 10.849536   | 10.427469   |
| "Impa2"  | 2.683423    | 3.077218    | 2.933268    | 2.7846456   | 3.2158046   | 3.5332289   | 3.1327167   | 3.3498394   |
| "Impact" | 8.253052    | 6.778357    | 7.2446957   | 6.7501903   | 6.398238    | 6.845149    | 6.345406    | 6.4475517   |
| "Impad1" | 8.410331667 | 8.906070833 | 8.3067241   | 8.208167533 | 8.822274    | 8.383341667 | 8.6837658   | 8.4652268   |
| "Impdh1" | 3.858995    | 3.3156426   | 3.401511    | 3.1163037   | 3.332458    | 3.3289354   | 3.336939    | 3.2145486   |
| "Impg1"  | 2.6463504   | 2.6195803   | 2.545848    | 2.5784028   | 2.6467803   | 2.6397157   | 2.6282997   | 2.6374378   |
| "Ina"    | 2.7469404   | 2.7172472   | 2.6025963   | 2.6536803   | 2.7559972   | 2.757124    | 2.71492     | 2.8546004   |
| "Inadl"  | 4.0548852   | 4.5618379   | 4.5467865   | 4.2563977   | 4.24551825  | 3.82071875  | 4.856167    | 4.3304057   |
| "Inca1"  | 5.8181014   | 8.590327    | 7.4206867   | 7.502756    | 7.810818    | 8.143782    | 7.5512857   | 8.044498    |
| "Incenp" | 3.4524773   | 3.2664849   | 3.560215667 | 3.472067767 | 3.443046    | 3.4440455   | 3.528656633 | 3.213525367 |
| "Ing1"   | 8.0989745   | 7.8176647   | 7.2765308   | 7.594459    | 7.3638575   | 7.5106305   | 7.1801343   | 7.632646    |
| "Ing2"   | 8.419965    | 8.079882    | 7.7361283   | 8.224404    | 7.521121    | 8.092148    | 7.8541603   | 8.261311    |
| "Ing3"   | 7.418276    | 6.0870997   | 6.019088567 | 6.244676667 | 6.21266     | 6.390050833 | 6.112478733 | 6.0871906   |
| "Ing4"   | 3.6007785   | 3.73200235  | 3.8834524   | 3.87525775  | 3.7935286   | 4.05816135  | 3.7819484   | 3.93363965  |
| "Inhba"  | 3.5337784   | 6.131732    | 5.97617     | 5.7980437   | 7.1464643   | 6.010367    | 5.9913707   | 7.670708    |
| "Inhbb"  | 8.46982     | 6.4085917   | 4.6719775   | 4.6484876   | 5.5861506   | 6.39439     | 5.2703795   | 4.2036715   |
| "Inhbc"  | 4.634272    | 5.483727    | 5.5619063   | 4.775598    | 5.582067    | 5.667907    | 5.1496153   | 5.695956    |
| "Inhbe"  | 3.4797466   | 6.4429927   | 3.509589    | 5.2054524   | 7.4814134   | 7.152043    | 6.7719846   | 6.007395    |
| "Inmt"   | 11.137117   | 10.914978   | 12.513876   | 12.903413   | 12.469491   | 10.241861   | 13.355399   | 13.261481   |
| "Ino80"  | 4.9510287   | 4.47020685  | 4.4731934   | 4.88734115  | 4.5850272   | 4.6017437   | 4.5237014   | 4.48739485  |
| "Ino80b" | 2.861435    | 2.9124649   | 2.8750427   | 2.9077404   | 2.9339612   | 3.1430442   | 2.9357715   | 2.922846    |
| "Ino80c" | 6.1542926   | 6.51888     | 6.463055    | 5.952405    | 5.8828845   | 5.832039    | 6.231386    | 5.9118495   |
| "Ino80e" | 3.974080467 | 3.4571705   | 3.498914433 | 3.6734773   | 3.741968267 | 3.942264267 | 3.488448233 | 3.527805167 |
| "Inpp1"  | 3.3931954   | 3.3705425   | 3.7267754   | 3.6224258   | 3.3239295   | 3.3870625   | 3.9700558   | 3.8662543   |
| "Inpp4a" | 6.6311617   | 6.6033297   | 6.2934556   | 6.2691135   | 6.2785106   | 7.585177    | 6.2332835   | 6.6196556   |
| "Inpp5a" | 6.235079    | 5.838954    | 5.7411137   | 5.8463535   | 5.9747277   | 5.4130163   | 6.039029    | 5.945324    |
| "Inpp5b" | 7.884878    | 8.852825    | 8.787616    | 8.773429    | 8.549218    | 8.711804    | 8.617219    | 8.5307255   |
| "Inpp5d" | 4.4660741   | 3.94198275  | 4.41372955  | 4.27400235  | 4.2379438   | 4.2298781   | 4.1805313   | 4.0471688   |
| "Inpp5e" | 3.3624275   | 3.8096162   | 3.76363685  | 3.695301    | 3.71677065  | 3.40058625  | 3.66088645  | 3.85978675  |
| "Inpp5j" | 4.549815    | 4.762353    | 4.19114     | 4.394432    | 4.7741117   | 4.986965    | 4.3458977   | 4.5195847   |

|               |             |             |             |             |             |             |             |             |
|---------------|-------------|-------------|-------------|-------------|-------------|-------------|-------------|-------------|
| "Inpp5k"      | 3.8115454   | 3.8155044   | 3.689045733 | 3.9915289   | 3.840480167 | 3.692601133 | 3.787020833 | 4.0721181   |
| "Inpp11"      | 7.796866    | 7.6326666   | 7.780182    | 7.8718576   | 7.3066354   | 8.114754    | 7.6479297   | 7.774053    |
| "Ins1"        | 2.407271    | 2.3998115   | 2.7645254   | 2.3877878   | 2.4115033   | 2.4113045   | 2.421074    | 2.3988032   |
| "Insig2"      | 12.15143833 | 12.905131   | 11.42065867 | 10.82087467 | 12.11357533 | 13.22488967 | 12.307634   | 10.909484   |
| "Insl3"       | 5.1620955   | 5.4078293   | 4.8854804   | 5.713449    | 5.848062    | 5.465369    | 5.2906876   | 5.4261427   |
| "Insl6"       | 2.727273    | 2.6652017   | 3.0425596   | 2.6486483   | 2.715816    | 2.7072625   | 2.7162447   | 2.7014904   |
| "Insr"        | 2.495552    | 2.4723976   | 2.416283    | 2.4125946   | 2.844983    | 2.467561    | 2.4842606   | 2.4664836   |
| "Ints1"       | 3.0922103   | 3.0238066   | 3.8746607   | 3.1328743   | 3.2325523   | 2.8650947   | 3.4529142   | 3.30894     |
| "Ints12"      | 7.194172    | 6.6455636   | 6.401489    | 6.5404763   | 6.4841747   | 6.685247    | 6.078312    | 6.050923    |
| "Ints3"       | 5.5201185   | 5.2905531   | 5.4037585   | 5.3647654   | 5.367856    | 5.52054095  | 5.3863865   | 5.20710675  |
| "Ints4"       | 5.664982    | 6.41526     | 6.544031    | 6.528033    | 6.229915    | 5.976761    | 6.752896    | 6.3416324   |
| "Ints5"       | 7.17289525  | 6.5949773   | 6.84301135  | 6.42367475  | 6.96063415  | 6.8638528   | 7.0172813   | 6.95970925  |
| "Ints6"       | 7.734428    | 7.9104176   | 7.899877    | 7.3620925   | 8.284257    | 8.079257    | 8.100155    | 7.7411036   |
| "Ints7"       | 5.17617325  | 5.3450428   | 5.2911172   | 5.30912785  | 5.300495    | 5.740855    | 5.26494645  | 5.28840645  |
| "Ints8"       | 5.4150894   | 5.2417525   | 5.016348    | 5.2766098   | 5.3532852   | 5.59351275  | 5.36625505  | 5.7595212   |
| "Ints9"       | 5.063192    | 5.616492    | 5.5213323   | 5.658639    | 5.6742187   | 5.821537    | 5.6457834   | 5.9266915   |
| "Invs"        | 6.611347    | 6.917404    | 6.629882    | 7.094845    | 6.684187    | 7.1577725   | 6.6472287   | 6.6503615   |
| "Ip6k1"       | 6.0331412   | 6.0948956   | 5.8909254   | 5.9474883   | 5.96338825  | 5.78486985  | 5.3966317   | 5.99361195  |
| "Ipo11"       | 6.2571716   | 7.021364    | 6.9769707   | 7.105623    | 7.291146    | 7.1831665   | 7.059279    | 6.9235477   |
| "Ipo4"        | 7.9079735   | 8.110419733 | 8.116479667 | 7.885579133 | 7.850795667 | 8.216248333 | 7.694563    | 7.693539833 |
| "Ipo5"        | 5.5600698   | 6.0854226   | 5.715169933 | 5.8700607   | 5.938473667 | 6.093120333 | 5.599611767 | 5.800582    |
| "Ipo7"        | 9.922602    | 10.179457   | 9.579886    | 9.748641    | 10.01711    | 10.321521   | 9.576398    | 9.829674    |
| "Ipo8"        | 5.57113885  | 5.83576975  | 5.5836942   | 6.1705742   | 5.759296    | 5.8175568   | 5.9203908   | 5.975361    |
| "Ipo9"        | 6.0575747   | 5.9556403   | 6.234044    | 6.0234056   | 5.9746037   | 5.797367    | 6.104066    | 5.978447    |
| "Ipp"         | 6.049608    | 6.1496267   | 6.714104    | 6.710924    | 6.32204     | 6.696972    | 6.892469    | 6.8890476   |
| "Ippk"        | 4.83919     | 4.7451186   | 4.542998    | 4.4778075   | 5.5513296   | 4.9927936   | 5.001557    | 4.8429723   |
| "Iqcc"        | 1.6850529   | 2.7998989   | 2.7668033   | 2.7885144   | 3.038539    | 2.8126497   | 3.170925    | 2.8062446   |
| "Iqcf3"       | 2.9501102   | 2.93913435  | 2.78900075  | 2.87734005  | 2.97661605  | 2.9775666   | 2.9160958   | 2.98122175  |
| "Iqcj-schip1" | 3.0057209   | 2.8625302   | 3.1511462   | 3.1883647   | 3.0465903   | 2.980811    | 3.0130556   | 2.9111855   |
| "Iqgap1"      | 7.05799805  | 5.8347839   | 7.1618903   | 6.829936875 | 6.477811525 | 6.3415623   | 6.567552025 | 6.472257925 |
| "Iqgap2"      | 10.662924   | 10.867919   | 10.496808   | 10.673962   | 10.855312   | 11.010701   | 10.956852   | 10.667059   |
| "Iqsec1"      | 4.267159    | 4.64099515  | 4.99296035  | 4.70389315  | 4.8103615   | 4.49346445  | 4.8672027   | 4.68924405  |
| "Irak1"       | 8.2976171   | 8.409854075 | 8.2106405   | 8.135502925 | 8.3596225   | 8.4088779   | 8.345796325 | 8.29424895  |
| "Irak1bp1"    | 4.3120509   | 3.25143335  | 3.9379716   | 3.21461485  | 3.21008705  | 3.48744675  | 3.12434745  | 3.5104452   |
| "Irak4"       | 3.321934933 | 3.26444267  | 3.9313929   | 3.721377    | 3.559590567 | 3.473267333 | 3.396592233 | 3.3603067   |
| "Ireb2"       | 9.336947    | 9.481532    | 9.463849    | 9.581757    | 9.313532    | 9.527089    | 9.189721    | 9.656502    |
| "Irf1"        | 7.5877094   | 7.3231955   | 9.071026    | 9.369711    | 7.644269    | 7.7483096   | 8.431025    | 8.312272    |
| "Irf2"        | 7.2976193   | 7.408309    | 7.623912    | 7.726366    | 7.784167    | 7.5637      | 7.5390134   | 8.095209    |
| "Irf2bp1"     | 4.4994817   | 4.9317975   | 4.8870997   | 4.9342914   | 4.927721    | 4.9566054   | 5.066223    | 5.021787    |
| "Irf3"        | 4.7970622   | 5.172832175 | 5.4140931   | 5.52737295  | 5.2787655   | 5.872778625 | 5.49069595  | 5.474666775 |
| "Irf5"        | 5.3433366   | 5.253992    | 5.9953904   | 6.119645    | 5.6935883   | 5.5002594   | 5.479665    | 6.6317406   |
| "Irf6"        | 9.544791    | 8.252143    | 8.186151    | 8.495221    | 7.097576    | 8.852848    | 8.443929    | 8.591524    |
| "Irf7"        | 7.893751    | 5.8472753   | 8.420988    | 8.006318    | 5.869269    | 5.8504815   | 6.400202    | 7.05796     |
| "Irf8"        | 7.03247545  | 4.6928715   | 6.99389815  | 6.19629035  | 5.63414575  | 5.4512245   | 6.03860165  | 5.77335315  |
| "Irf9"        | 6.207247    | 6.169456    | 7.135611    | 6.812407    | 5.937822    | 6.07356     | 6.3996634   | 6.213648    |
| "Irg1"        | 2.5856652   | 2.5467613   | 2.8039546   | 3.216694    | 2.5661452   | 2.5581014   | 2.5752215   | 2.6477344   |
| "Irgm1"       | 7.722593    | 7.6406      | 9.725518    | 8.977906    | 7.769625    | 7.216681    | 8.983119    | 8.27883     |
| "Irgm2"       | 7.9921784   | 7.996522    | 10.346945   | 9.916324    | 8.393169    | 8.606808    | 9.739873    | 9.3211155   |
| "Irs1"        | 8.334696    | 7.1081886   | 8.842775    | 8.528305    | 8.488462    | 8.096094    | 9.012358    | 8.627048    |
| "Irs2"        | 9.631982    | 6.4450297   | 7.0453677   | 6.4528365   | 5.1621895   | 7.103815    | 4.965213    | 6.7625594   |
| "Irs3"        | 2.4618485   | 2.4300914   | 2.3481963   | 2.382848    | 2.4573786   | 2.4458306   | 2.4427664   | 2.4407222   |
| "Irx3"        | 4.474795    | 4.649296    | 4.188727    | 5.2482176   | 4.240752    | 4.2669554   | 3.183231    | 4.4338713   |
| "Isca1"       | 9.0427645   | 9.0949495   | 8.232534    | 8.41549085  | 8.690923    | 8.693414    | 8.2940545   | 8.6062778   |
| "Isca2"       | 9.181184    | 9.642481    | 9.4753      | 9.449465    | 9.468355    | 9.40504     | 9.528293    | 9.369076    |
| "Iscau"       | 10.617874   | 11.351685   | 10.763759   | 10.937696   | 11.063393   | 10.828583   | 10.98903    | 10.886763   |
| "Isq20"       | 6.1615686   | 4.3822765   | 5.7320013   | 5.620537    | 5.5525675   | 5.528407    | 5.137537    | 4.282512    |
| "Isl2"        | 3.3449624   | 3.4487798   | 3.3555284   | 3.4335322   | 3.4672558   | 3.474446    | 3.258287    | 3.566206    |
| "Islr"        | 2.6233954   | 2.7052405   | 2.7047288   | 2.6936555   | 2.8549378   | 2.599645    | 3.2705622   | 2.8120682   |
| "Isoc1"       | 7.649393567 | 8.503441    | 8.867842    | 9.0528615   | 8.771667333 | 8.173858333 | 9.164769    | 8.821086    |
| "Isoc2b"      | 5.3389487   | 6.384243    | 5.85502     | 6.6870556   | 6.524759    | 6.240247    | 6.3129134   | 6.1032696   |
| "Isy1"        | 4.6888676   | 4.7750416   | 4.935218    | 4.4567175   | 3.9366903   | 4.0246325   | 4.7231436   | 4.6894894   |
| "Isyna1"      | 7.262826    | 4.3425274   | 8.949928    | 7.3219056   | 5.531466    | 6.2746925   | 5.0313697   | 6.739761    |
| "Itch"        | 9.679609    | 9.864155    | 9.39614     | 9.927942    | 9.905315    | 10.085712   | 9.538147    | 9.946362    |
| "Itfg1"       | 8.5187876   | 8.915406    | 8.69339625  | 9.009675    | 9.002128    | 8.76580185  | 9.0713465   | 8.9491615   |
| "Itfg2"       | 3.4238956   | 3.8196914   | 2.8348985   | 3.0249789   | 3.1853719   | 3.177627    | 2.9034672   | 3.1748362   |
| "Itga2"       | 2.5239158   | 2.4895082   | 2.454136    | 2.4740183   | 2.511363    | 2.5031714   | 2.4875119   | 2.4968224   |
| "Itga2b"      | 2.437108    | 2.3951879   | 2.4526584   | 2.3697922   | 2.4162357   | 2.8137407   | 1.969263    | 2.4044478   |
| "Itga3"       | 3.0286906   | 3.019682    | 2.9403317   | 2.953857    | 3.1698418   | 3.5203288   | 3.0265563   | 3.000993    |
| "Itga4"       | 2.85621     | 2.8372344   | 2.8075315   | 2.79769955  | 2.8677949   | 2.86074055  | 2.83813215  | 2.8652965   |
| "Itga5"       | 2.4343805   | 2.395898    | 2.369734    | 2.3434958   | 2.4206822   | 2.4219422   | 2.4048529   | 2.4202251   |
| "Itga6"       | 3.7721513   | 3.48467085  | 5.5923248   | 4.11090085  | 4.1778965   | 3.80258115  | 5.27715065  | 3.9427147   |
| "Itga7"       | 2.406931    | 2.3910522   | 2.352418    | 2.3690915   | 2.5502088   | 3.3287883   | 2.4102266   | 2.3860247   |
| "Itga9"       | 5.0015541   | 3.9188998   | 4.984815    | 4.6725069   | 4.330566533 | 4.251248733 | 4.752754667 | 4.425499867 |
| "Itgae"       | 2.303434    | 2.777038    | 2.7855062   | 2.7611647   | 2.810317    | 2.8231578   | 2.810582    | 2.7952704   |
| "Itgam"       | 3.9007392   | 2.544961    | 3.5355704   | 2.6270456   | 2.5650835   | 2.9234521   | 2.5693843   | 2.6124072   |
| "Itgav"       | 5.8406232   | 4.8298837   | 5.129165733 | 4.894867267 | 4.818977933 | 4.911459967 | 4.916569567 | 4.8218217   |
| "Itgax"       | 2.2331872   | 1.9831278   | 2.406822    | 1.9542215   | 2.0053828   | 1.9836942   | 1.995433    | 1.9907367   |
| "Itgb1"       | 5.56350268  | 5.5759952   | 5.53433706  | 5.4847108   | 5.60329448  | 5.58579366  | 5.5048568   | 5.57735678  |
| "Itgb1bp1"    | 7.753682    | 7.1320868   | 8.013665    | 7.402477    | 6.887154    | 7.663572    | 7.359373    | 7.203768    |
| "Itgb2"       | 9.515266    | 7.737952    | 9.382554    | 8.840841    | 7.952346    | 7.8285418   | 8.218088    | 8.043943    |
| "Itgb2l"      | 2.4465156   | 2.416053    | 2.3821201   | 2.3859148   | 2.4437587   | 2.5177937   | 2.4320831   | 2.4152348   |

|            |             |             |             |             |             |             |             |             |
|------------|-------------|-------------|-------------|-------------|-------------|-------------|-------------|-------------|
| "ltgb3bp"  | 3.138762533 | 3.164287967 | 3.092245933 | 3.1857097   | 3.203691667 | 3.197693133 | 3.296901067 | 3.255592067 |
| "ltgb5"    | 8.66524125  | 8.07393215  | 9.259387375 | 9.1009685   | 8.7358695   | 8.6600085   | 9.00569575  | 8.616166    |
| "ltgb6"    | 2.3944898   | 2.3704848   | 2.3114057   | 2.361846    | 2.392323    | 2.3852198   | 2.3871453   | 2.3921666   |
| "ltgb7"    | 2.8109777   | 3.2872968   | 2.738541    | 2.7440205   | 2.781033    | 2.7970383   | 2.7898934   | 2.870803    |
| "ltgbl1"   | 2.6307003   | 2.6001065   | 2.518165    | 2.5705457   | 2.6295993   | 2.6138291   | 2.6125197   | 2.7531314   |
| "ltih1"    | 12.403891   | 12.384611   | 12.770836   | 12.6742935  | 12.8202     | 13.014898   | 12.750932   | 12.709113   |
| "ltih2"    | 12.919103   | 12.560914   | 12.994797   | 12.608978   | 12.818633   | 13.092711   | 12.9583025  | 12.803768   |
| "ltih3"    | 14.306934   | 14.295351   | 14.443338   | 13.900276   | 14.244719   | 14.420296   | 13.7979765  | 14.081819   |
| "ltih4"    | 14.241561   | 13.827865   | 14.305643   | 14.127568   | 14.420086   | 14.579375   | 14.063881   | 14.220734   |
| "ltih5"    | 7.777332    | 8.0816145   | 7.85968     | 8.263734    | 8.317598    | 7.4742193   | 8.528473    | 8.799735    |
| "ltk"      | 2.37906275  | 2.35276755  | 2.3204005   | 2.3319138   | 2.36949075  | 2.3617975   | 2.3696569   | 2.381019    |
| "ltln1"    | 2.4444695   | 2.4097605   | 2.584567    | 2.3736858   | 2.4276452   | 2.4264967   | 2.4085722   | 2.419708    |
| "ltm2a"    | 3.5077553   | 3.7042249   | 3.5133129   | 3.38414215  | 3.9518085   | 3.1103288   | 3.4632257   | 3.3628552   |
| "ltm2b"    | 9.9068584   | 9.906564433 | 9.935302567 | 10.0500269  | 10.02770833 | 9.864149733 | 10.07653473 | 10.03220153 |
| "ltm2c"    | 9.358974    | 8.450613    | 9.830752    | 9.035704    | 9.100801    | 8.494191    | 9.254942    | 9.077881    |
| "ltpa"     | 7.5667057   | 7.573964    | 7.4734545   | 7.4321613   | 7.885141    | 7.500086    | 7.541924    | 7.5004807   |
| "ltpk1"    | 6.329596    | 6.8889613   | 6.7676287   | 6.2397285   | 6.183648    | 6.5803623   | 6.799186    | 6.294058    |
| "ltpka"    | 2.315391    | 2.2814546   | 2.2158062   | 2.4030085   | 2.328053    | 2.354276    | 2.307025    | 2.4814048   |
| "ltpkb"    | 3.754615    | 3.6921477   | 3.6959085   | 3.707306    | 3.8318408   | 3.5167491   | 3.811213    | 3.6973116   |
| "ltpr1"    | 8.850317    | 8.26243635  | 7.448906    | 7.7601885   | 8.165326    | 8.8583807   | 7.3455388   | 8.0038645   |
| "ltpr2"    | 4.801038225 | 4.601443    | 4.409165675 | 4.41780085  | 4.468431475 | 4.645008425 | 4.432038325 | 4.490604175 |
| "ltsn1"    | 5.78700635  | 5.215705375 | 6.025973125 | 5.754170425 | 5.513180325 | 5.753963075 | 6.2547677   | 5.44920965  |
| "ltsn2"    | 7.521556667 | 7.335475    | 7.195228867 | 7.385995867 | 7.392427167 | 7.650543867 | 7.454260433 | 7.430884333 |
| "lvd"      | 8.6031455   | 8.657348    | 9.34777775  | 9.220731    | 8.2607555   | 7.828883    | 8.9620005   | 8.9222405   |
| "lvi"      | 2.8894103   | 2.8715475   | 2.7582886   | 2.8072276   | 2.8937652   | 2.927416    | 2.8598669   | 2.8745968   |
| "lvns1abp" | 9.8122118   | 9.56842433  | 8.1446902   | 8.493956433 | 8.902992433 | 8.804505333 | 8.447144767 | 8.2797341   |
| "lyd"      | 10.559752   | 10.7114525  | 11.01905    | 11.370962   | 10.971004   | 10.372467   | 11.122745   | 11.201087   |
| "jag1"     | 3.3407283   | 3.2867646   | 3.2765381   | 3.2300773   | 3.3242056   | 3.3257332   | 3.674723    | 3.3093164   |
| "jag2"     | 2.46982745  | 2.4469166   | 2.38829335  | 2.4117773   | 2.4626646   | 2.4928467   | 2.4674793   | 2.4495916   |
| "jagn1"    | 8.4823475   | 8.603684    | 8.022699    | 8.016283    | 8.561906    | 8.8163      | 8.165074    | 8.442148    |
| "jak1"     | 8.552399667 | 8.028653233 | 8.432063333 | 8.18644     | 8.158006    | 8.270968867 | 8.023499667 | 7.962168467 |
| "jak2"     | 6.8796047   | 5.9909187   | 6.6432471   | 6.62149185  | 6.2064797   | 6.35921595  | 6.4987547   | 6.738172    |
| "jam2"     | 3.784269567 | 3.440556533 | 2.855641433 | 3.1136302   | 3.666371233 | 3.3896706   | 3.321600633 | 3.519825933 |
| "jam3"     | 2.3816874   | 2.277043    | 2.4086633   | 2.4001842   | 2.364074    | 2.3581398   | 2.4400356   | 2.3525152   |
| "jarid2"   | 4.940766233 | 4.889883867 | 5.1005093   | 5.362545    | 5.038653267 | 4.404973267 | 5.1555955   | 5.302260067 |
| "jdp2"     | 8.572735    | 6.229376    | 6.5500116   | 5.563644    | 6.5612755   | 6.481998    | 6.1545496   | 4.81076     |
| "jhdmd1d"  | 2.774153    | 2.8276029   | 2.7083986   | 2.6813602   | 2.7676942   | 2.7774017   | 2.774981    | 2.7598395   |
| "jkamp"    | 8.0109515   | 8.385058    | 8.4936855   | 8.7518255   | 8.5596455   | 8.575456    | 8.6950195   | 8.525465    |
| "jmjd1c"   | 9.564678    | 9.094596    | 8.9748745   | 9.104876    | 9.26658     | 9.767217    | 9.515617    | 9.15924     |
| "jmjd5"    | 3.3787591   | 3.3951113   | 2.7867606   | 3.1250648   | 3.2587974   | 3.2164712   | 3.0463445   | 3.2068346   |
| "jmjd6"    | 5.90997025  | 5.70700815  | 5.40482965  | 5.4871525   | 5.8922778   | 5.72049815  | 4.874044    | 5.567644    |
| "jmjd7"    | 5.038663    | 5.6010504   | 4.648654    | 4.6391773   | 5.3753242   | 5.5072503   | 4.6808853   | 4.6488667   |
| "jmjd8"    | 5.303756    | 5.405595    | 5.8365655   | 6.288181    | 5.8838058   | 5.5077295   | 6.2158384   | 6.391732    |
| "jmy"      | 4.8012008   | 4.4203968   | 4.200484133 | 4.354285667 | 4.499612333 | 4.9568315   | 4.392981033 | 4.438659333 |
| "josd2"    | 3.3716056   | 3.0851064   | 3.434213    | 3.3194516   | 3.2648666   | 3.5441198   | 3.4232657   | 3.3294015   |
| "jph1"     | 2.571383    | 2.5311475   | 2.3494103   | 2.5257177   | 2.5998535   | 2.5974917   | 2.4969316   | 2.5407777   |
| "jrk"      | 2.3027754   | 2.2787066   | 2.3207018   | 2.2669363   | 2.2987463   | 2.288775    | 2.2881446   | 2.284617    |
| "jtb"      | 11.298132   | 11.371666   | 11.299411   | 11.430124   | 11.468324   | 11.760094   | 11.52878    | 11.405706   |
| "jub"      | 5.090051    | 5.7483087   | 6.1712756   | 5.589882    | 4.963621    | 5.3959713   | 5.605768    | 5.526435    |
| "jun"      | 9.7598415   | 7.567805    | 5.95426     | 7.12822275  | 6.715621    | 7.66849975  | 6.1711808   | 6.05881025  |
| "jumb"     | 7.606439    | 3.1247535   | 4.6997175   | 5.4339385   | 3.155713    | 4.5029345   | 5.86008     | 4.927226    |
| "jund"     | 11.391986   | 10.403349   | 10.184777   | 10.267968   | 9.45156     | 10.850515   | 10.225848   | 9.938598    |
| "jup"      | 5.2723427   | 6.8699007   | 5.7351255   | 5.981806    | 5.676201    | 5.857935    | 5.7756495   | 5.3583975   |
| "kalrn"    | 4.3524232   | 4.9459739   | 4.5445333   | 5.0165219   | 4.6942028   | 4.3244128   | 4.8297944   | 5.09985615  |
| "kank2"    | 5.1864986   | 5.153744    | 6.3925076   | 6.451348    | 5.742775    | 5.6303806   | 6.276168    | 6.2114906   |
| "kank3"    | 4.47531485  | 4.404881    | 3.36251225  | 3.9014256   | 4.4004331   | 5.2057673   | 4.12979735  | 4.0210208   |
| "kansl1"   | 4.10675655  | 3.8865761   | 3.884812    | 3.96305535  | 4.17777135  | 4.11787115  | 4.0241859   | 3.98865545  |
| "kansl1l"  | 5.5904672   | 5.2097121   | 5.2633368   | 5.878611767 | 5.3437333   | 5.564758767 | 5.7593398   | 5.4960515   |
| "kansl2"   | 8.736315    | 8.894538    | 8.680572    | 8.709166    | 9.125387    | 9.120121    | 8.746762    | 9.026576    |
| "kap"      | 2.4360516   | 2.4088902   | 2.3512158   | 2.3705227   | 2.4372478   | 2.4641242   | 2.427446    | 2.4223375   |
| "kars"     | 7.9581704   | 8.185987    | 8.293377    | 8.061692    | 8.126082    | 8.078607    | 7.876491    | 8.327435    |
| "kat2a"    | 4.51634095  | 4.6211685   | 4.6170093   | 4.7097126   | 4.6488919   | 4.83638115  | 4.6401318   | 4.5603805   |
| "kat2b"    | 7.4360197   | 8.0800395   | 7.81475115  | 8.224724    | 8.2161796   | 7.9814735   | 8.38792265  | 8.7008817   |
| "katna1"   | 7.9271903   | 7.744321    | 8.172484    | 8.510975    | 7.621767    | 7.9543896   | 8.250807    | 8.146477    |
| "kazald1"  | 2.4849176   | 2.451865    | 2.400492    | 2.4459157   | 2.7059853   | 2.4619355   | 2.474499    | 2.4556398   |
| "kbtbd2"   | 8.059069    | 7.6075616   | 7.8641477   | 7.847072    | 7.850981    | 7.8408575   | 7.7540894   | 7.9279      |
| "kbtbd4"   | 5.984947    | 5.44425     | 6.2784634   | 5.886559    | 5.954727    | 5.8991323   | 6.422076    | 5.903194    |
| "kcmf1"    | 6.696635267 | 6.8802502   | 5.9927556   | 6.775591867 | 6.697870033 | 7.1817651   | 6.729093    | 6.947578033 |
| "kcna1"    | 2.4366374   | 2.404634    | 2.3976283   | 2.391817    | 2.4246128   | 2.4362378   | 2.3933942   | 2.4096305   |
| "kcna7"    | 2.2141774   | 2.5108066   | 2.12963     | 2.183078    | 2.2190592   | 2.2084982   | 2.2048304   | 2.2420194   |
| "kcna1b1"  | 2.548369    | 2.5238914   | 2.4614797   | 2.4932427   | 2.549362    | 2.5501013   | 2.536532    | 2.5622022   |
| "kcna1b3"  | 2.9642167   | 3.1406662   | 2.8151355   | 2.8686826   | 3.0333495   | 2.9573507   | 2.9217665   | 2.9549265   |
| "kcna1b"   | 4.891525067 | 5.086568567 | 5.300475167 | 5.323392133 | 5.707702967 | 5.075704433 | 5.3089645   | 5.328786667 |
| "kcnc3"    | 2.75480975  | 2.9218433   | 2.75859545  | 2.6974445   | 2.84714365  | 2.395516    | 2.87371125  | 2.81853415  |
| "kcnc4"    | 3.2988486   | 3.4342716   | 3.091979    | 3.3006773   | 3.3485699   | 3.3334455   | 3.2812793   | 3.387397    |
| "kcnd1"    | 2.4282947   | 2.3963757   | 2.3385897   | 2.3831444   | 2.4210854   | 2.4185524   | 2.4110157   | 2.4053032   |
| "kcnd2"    | 2.5035822   | 2.4886975   | 2.3911264   | 2.4288044   | 2.5023956   | 2.499417    | 2.4904249   | 2.4930146   |
| "kcnd3"    | 2.445353    | 2.4191403   | 2.3299177   | 2.3940463   | 2.4389424   | 2.430901    | 2.4352043   | 2.4229074   |
| "kcne2"    | 2.5256054   | 2.4954684   | 2.436261    | 2.4660418   | 2.51816     | 2.5106637   | 2.4614065   | 2.569634    |
| "kcne3"    | 3.0188107   | 2.9577293   | 3.5316715   | 2.9417143   | 3.032809    | 3.0371907   | 3.199332    | 3.0206063   |
| "kcne4"    | 2.5641007   | 2.5303884   | 2.4810705   | 2.5065832   | 2.7441535   | 2.540092    | 2.5522027   | 2.5544477   |

|           |             |             |             |             |             |             |             |             |
|-----------|-------------|-------------|-------------|-------------|-------------|-------------|-------------|-------------|
| "Kcnh3"   | 4.395925    | 4.636127    | 4.3837757   | 4.4391007   | 4.4657116   | 4.4636793   | 4.099635    | 4.4510264   |
| "Kcni1"   | 2.415124267 | 2.386048167 | 2.324979533 | 2.339973633 | 2.506610067 | 2.480443867 | 2.379696933 | 2.390199467 |
| "Kcni2"   | 2.419948    | 2.3905425   | 2.3229153   | 2.359734    | 2.491201    | 2.4084387   | 2.414009    | 2.4017162   |
| "Kcni3"   | 2.4048145   | 2.3814533   | 2.2527645   | 2.3574374   | 2.4209416   | 2.527737    | 2.36271     | 2.3983314   |
| "Kcni4"   | 2.5821059   | 2.5532858   | 2.5095224   | 2.5399115   | 2.5869787   | 2.5903997   | 2.5809374   | 2.5776842   |
| "Kcnj1"   | 2.412902    | 2.3812687   | 2.3199086   | 2.3442564   | 2.4000435   | 2.394649    | 2.4024026   | 2.3883786   |
| "Kcnj10"  | 3.4890192   | 3.45504     | 3.552455    | 3.9109962   | 3.3423438   | 3.5069413   | 3.5608058   | 3.5005107   |
| "Kcnj12"  | 2.3991668   | 2.3675985   | 2.3026657   | 2.3187432   | 2.3879282   | 2.3824842   | 2.3819935   | 2.3797557   |
| "Kcnj15"  | 2.4268837   | 2.4072206   | 2.3469436   | 2.3756914   | 2.4386435   | 2.436765    | 2.4179182   | 2.4352033   |
| "Kcnj2"   | 2.8065994   | 2.7850254   | 2.683274    | 2.733055    | 2.8680267   | 2.829236    | 2.7671938   | 2.8431573   |
| "Kcnj3"   | 2.5605729   | 2.5316164   | 2.4850411   | 2.471245    | 2.5642636   | 2.548658    | 2.5309768   | 2.5419238   |
| "Kcnj5"   | 2.3666804   | 2.3442938   | 2.2491043   | 2.3213985   | 2.4442875   | 2.3863394   | 2.35276     | 2.3543427   |
| "Kcnj6"   | 2.67442708  | 2.64764392  | 2.59280616  | 2.6288145   | 2.72038318  | 2.65837064  | 2.66068946  | 2.67472188  |
| "Kcnj8"   | 7.403015    | 6.32011     | 7.681325    | 6.246317    | 5.9561644   | 6.8507075   | 6.3745165   | 5.980533    |
| "Kcnj9"   | 2.6380737   | 2.6122255   | 2.56862285  | 2.72838015  | 2.63116025  | 2.6383088   | 2.58414475  | 2.7222403   |
| "Kcnk1"   | 2.3983289   | 2.37523125  | 2.34152735  | 2.3528336   | 2.397146    | 2.39546385  | 2.38784755  | 2.413542    |
| "Kcnk13"  | 3.4196858   | 3.400422    | 3.448214    | 3.2770426   | 3.489002    | 3.3949661   | 3.3590868   | 3.3539839   |
| "Kcnk2"   | 2.569943    | 2.5460398   | 2.4627073   | 2.5154548   | 2.5776818   | 2.558488    | 2.5552278   | 2.5547385   |
| "Kcnk3"   | 2.8147511   | 2.7794476   | 2.7540808   | 2.7088463   | 2.8021777   | 2.791468    | 2.8010843   | 2.7877614   |
| "Kcnk5"   | 7.3641562   | 7.001436    | 4.8590546   | 7.2259774   | 7.011931    | 4.946854    | 6.1994786   | 6.6841593   |
| "Kcnma1"  | 2.513114    | 2.484743    | 2.4029627   | 2.4403172   | 2.5110462   | 2.5403523   | 2.4994504   | 2.5027096   |
| "Kcnn1"   | 2.96575265  | 3.0564506   | 2.9612815   | 2.999566    | 3.09334265  | 3.03051565  | 2.92299235  | 2.9932119   |
| "Kcnn2"   | 8.265071    | 9.118194    | 8.398548    | 8.870468    | 8.9813175   | 9.179676    | 8.987037    | 8.497653    |
| "Kcnn4"   | 2.50883     | 2.4713855   | 2.4391928   | 2.4610832   | 2.4937437   | 2.48338     | 2.4973383   | 2.4782903   |
| "Kcnq1"   | 2.607609    | 2.675533    | 2.5939274   | 2.8513973   | 2.7051437   | 2.6276064   | 2.7520766   | 2.6965277   |
| "Kcnq2"   | 2.475363967 | 2.441457533 | 2.386418367 | 2.4196255   | 2.4689335   | 2.4667812   | 2.461078867 | 2.498271767 |
| "Kcnq5"   | 2.8710647   | 2.851194    | 2.7167764   | 2.7831087   | 2.893179    | 2.912756    | 2.844892    | 2.895988    |
| "Kcns2"   | 2.4684377   | 2.435481    | 2.3437521   | 2.3994708   | 2.4555204   | 2.4489036   | 2.4537034   | 2.4606924   |
| "Kctd1"   | 3.2102616   | 3.2856512   | 3.8030112   | 3.276423    | 3.30714     | 3.3009226   | 2.9940538   | 3.3121345   |
| "Kctd10"  | 4.700083    | 4.374312    | 5.0576873   | 4.460514    | 4.287732    | 4.425313    | 4.468485    | 4.125485    |
| "Kctd11"  | 3.837079    | 4.0515885   | 4.0399323   | 3.9972734   | 4.070844    | 4.276705    | 4.076651    | 4.628206    |
| "Kctd12"  | 9.381976    | 7.27224     | 9.202142    | 8.633198    | 8.106718    | 7.8322535   | 8.792013    | 8.057198    |
| "Kctd14"  | 2.4468102   | 2.5729508   | 2.3409762   | 2.3708186   | 2.4489546   | 2.4393      | 2.4290903   | 2.4419112   |
| "Kctd17"  | 3.4017918   | 3.4953585   | 3.2583103   | 3.2608685   | 3.2904537   | 3.2838533   | 3.2957017   | 3.279166    |
| "Kctd2"   | 7.0294394   | 7.001867    | 7.6791635   | 7.6591735   | 8.038824    | 7.948729    | 7.996339    | 7.8532996   |
| "Kctd20"  | 6.331444733 | 6.642026133 | 6.465183867 | 6.575258467 | 6.513108533 | 6.400993733 | 6.3785541   | 6.5131792   |
| "Kctd4"   | 2.4336011   | 2.419963    | 2.3266873   | 2.3799045   | 2.4351778   | 2.431994    | 2.4196727   | 2.4290218   |
| "Kctd5"   | 5.0530468   | 4.4346645   | 4.20988805  | 4.44553245  | 4.01980225  | 4.35349965  | 4.5136551   | 4.2908275   |
| "Kctd9"   | 5.3166327   | 5.8180566   | 4.9861393   | 4.809216    | 5.5651484   | 5.316489    | 4.901279    | 4.7627206   |
| "Kdelc1"  | 6.35297115  | 6.3352562   | 6.94367     | 6.499712    | 6.270932    | 6.7292985   | 6.3803085   | 6.4971158   |
| "Kdelr1"  | 9.701719    | 10.029333   | 10.030105   | 10.058885   | 10.165525   | 9.7815      | 9.847516    | 9.936319    |
| "Kdelr2"  | 10.19889    | 10.0826345  | 10.2916545  | 9.71135565  | 10.00961425 | 9.3385955   | 9.632436    | 9.7647415   |
| "Kdm1a"   | 7.4571408   | 7.161023    | 7.1609263   | 7.111397    | 7.2343156   | 7.2452715   | 7.1734837   | 7.12437685  |
| "Kdm2b"   | 6.864532    | 5.8744373   | 6.9408875   | 6.134124    | 6.309222    | 6.294117    | 6.8877096   | 6.1148357   |
| "Kdm3a"   | 8.411352    | 7.280055    | 7.607271    | 7.6557655   | 7.807708    | 8.128901    | 7.765675    | 7.880695    |
| "Kdm3b"   | 7.9051213   | 7.862899    | 7.82542     | 7.81592     | 7.7856874   | 7.9547443   | 7.744345    | 7.927562    |
| "Kdm4b"   | 3.3501875   | 3.3208597   | 3.2653685   | 3.290273    | 3.3456917   | 3.3299625   | 3.3401759   | 3.7805939   |
| "Kdm4c"   | 5.977926    | 5.948623    | 5.967839    | 5.9978757   | 5.9411983   | 6.32201     | 6.1087847   | 5.766944    |
| "Kdm5a"   | 7.8733134   | 7.4889193   | 7.8199563   | 7.689625    | 7.713552    | 7.4860697   | 7.501981    | 7.602982    |
| "Kdm5b"   | 5.21393635  | 5.4243385   | 5.23751065  | 5.58651135  | 5.24962715  | 5.10111955  | 5.1113249   | 5.5455635   |
| "Kdm5c"   | 2.85407165  | 2.80653285  | 2.9425358   | 2.66733255  | 2.96413685  | 2.97460485  | 2.7540022   | 2.8254297   |
| "Kdm5d"   | 2.5251051   | 3.6021308   | 2.6016807   | 4.22532835  | 2.51370835  | 4.2114951   | 2.50738375  | 4.18928435  |
| "Kdm6a"   | 7.9698328   | 6.78118535  | 7.3124972   | 6.6924505   | 8.0500905   | 7.11760315  | 7.6963695   | 6.71094705  |
| "Kdr"     | 8.217248    | 7.4282384   | 8.424632    | 8.326108    | 7.8918557   | 7.7589726   | 8.761257    | 8.258124    |
| "Keap1"   | 7.397513    | 7.2401137   | 7.898882    | 7.7332997   | 7.208901    | 7.4848905   | 7.2424073   | 7.343073    |
| "Keg1"    | 8.453426    | 9.662116    | 7.9194484   | 9.237911    | 8.41847     | 8.37574     | 7.614758    | 9.936474    |
| "Kera"    | 2.3232992   | 2.2958374   | 2.2373242   | 2.2545335   | 2.365929    | 2.3728664   | 2.3091218   | 2.299997    |
| "Khdc1a"  | 2.7035632   | 2.678606    | 2.5701888   | 2.615324    | 2.7112718   | 2.719068    | 2.6760542   | 2.7078865   |
| "Khdc1b"  | 2.92479515  | 2.96976345  | 2.8608359   | 2.8910853   | 2.96291835  | 3.0469049   | 2.8649895   | 2.986135    |
| "Khdrbs1" | 6.1626444   | 6.554575143 | 6.505363086 | 6.451665329 | 6.451707086 | 6.445610557 | 6.541618414 | 6.433552171 |
| "Khdrbs2" | 2.410122    | 2.3798358   | 2.3352373   | 2.3411794   | 2.4240465   | 2.3979707   | 2.3890808   | 2.3932145   |
| "Khdrbs3" | 5.3471904   | 6.775161    | 6.131447    | 6.5136495   | 7.0906987   | 5.8415923   | 7.4116144   | 6.36505     |
| "Khk"     | 9.135633    | 11.059485   | 9.605723    | 10.797811   | 12.1165905  | 10.8604765  | 10.662321   | 11.102454   |
| "Kif11"   | 2.8051438   | 2.7696757   | 2.8157387   | 2.720709    | 2.7897477   | 2.7840204   | 2.7871275   | 2.7922733   |
| "Kif12"   | 2.5023534   | 2.4656608   | 2.3811343   | 2.4464638   | 2.4859636   | 2.482674    | 2.4902787   | 2.4729764   |
| "Kif13a"  | 2.3656042   | 2.7490652   | 2.2798624   | 2.304078    | 2.353678    | 2.3318584   | 2.3586392   | 2.3499682   |
| "Kif16b"  | 4.5614325   | 3.9338024   | 4.15695835  | 4.118275    | 4.05427865  | 4.323555    | 4.3080827   | 4.2919394   |
| "Kif17"   | 2.58554885  | 2.55682485  | 2.46471735  | 2.53333715  | 2.58347135  | 2.589222    | 2.57016705  | 2.58366275  |
| "Kif18a"  | 3.195039    | 3.1618783   | 3.026262    | 3.1210907   | 3.2009494   | 3.2943697   | 3.119306    | 3.2521262   |
| "Kif1a"   | 2.510603    | 2.4959579   | 2.4154088   | 2.455745    | 2.5079892   | 2.5049052   | 2.4956398   | 2.5566106   |
| "Kif1b"   | 5.828114471 | 6.020146743 | 6.064469929 | 6.2565615   | 6.567539771 | 6.054945986 | 6.359469171 | 6.409160786 |
| "Kif1c"   | 5.6616322   | 5.7540527   | 5.88095935  | 5.9215606   | 6.0203112   | 6.13130675  | 6.11627145  | 6.1488067   |
| "Kif20a"  | 2.9332714   | 2.9007635   | 2.8714802   | 2.8775077   | 2.9834223   | 2.9822361   | 2.928675    | 2.9879053   |
| "Kif21a"  | 10.815799   | 9.193766    | 8.724361    | 8.733804    | 8.62339     | 9.225361    | 8.386305    | 8.937842    |
| "Kif21b"  | 2.2859936   | 2.4401193   | 2.1159532   | 2.1955323   | 2.28271     | 2.2702658   | 2.2488105   | 2.2762063   |
| "Kif22"   | 4.458982133 | 4.394262    | 4.4087134   | 4.4608094   | 4.414471333 | 4.327419533 | 4.467483667 | 4.392254467 |
| "Kif23"   | 3.472101667 | 3.158309267 | 3.231008067 | 3.128710133 | 3.198540433 | 2.906606133 | 3.1193916   | 3.1758642   |
| "Kif2a"   | 4.097575167 | 4.109847567 | 3.896696667 | 3.8037651   | 3.8087777   | 3.8840642   | 3.7881957   | 3.569970133 |
| "Kif2c"   | 2.829358    | 2.8166915   | 2.70618295  | 2.7526455   | 2.84593065  | 2.94928385  | 2.8085853   | 2.8261641   |
| "Kif3a"   | 3.30814335  | 3.2267675   | 3.8172186   | 3.6399907   | 3.0247127   | 3.69661355  | 3.64388655  | 3.2836698   |
| "Kif3b"   | 3.49430965  | 3.339077775 | 3.4523404   | 3.402886175 | 3.355351675 | 3.195605575 | 3.38228865  | 3.33105105  |

|           |             |             |             |             |             |             |             |             |
|-----------|-------------|-------------|-------------|-------------|-------------|-------------|-------------|-------------|
| "Kif3c"   | 3.0984583   | 3.0637872   | 3.0510345   | 3.064549    | 3.0899456   | 3.0770946   | 3.0946307   | 3.1963818   |
| "Kif5a"   | 2.59236725  | 2.5720589   | 2.50494965  | 2.5456655   | 2.6111236   | 2.5868372   | 2.59316555  | 2.58105015  |
| "Kif5b"   | 8.8369371   | 8.597821    | 8.06916914  | 8.09802996  | 8.27694052  | 8.5865547   | 8.364533    | 8.41811606  |
| "Kif5c"   | 2.736227    | 2.7128832   | 2.5981247   | 2.6913967   | 2.7355793   | 2.7751029   | 2.7276466   | 2.723687    |
| "Kifap3"  | 4.940918    | 4.73050935  | 5.30833985  | 4.9181467   | 4.992104    | 4.9854868   | 5.34955775  | 4.78297075  |
| "Kifc2"   | 3.0543175   | 3.04036035  | 2.9753977   | 3.11802485  | 3.1004671   | 3.10426815  | 3.0302843   | 3.1308688   |
| "Kifc3"   | 5.5542173   | 5.4389853   | 6.215808    | 5.8313994   | 6.158841    | 5.371142    | 6.048354    | 6.5218234   |
| "Kifc5b"  | 2.8135448   | 2.781533    | 2.7195768   | 2.744635    | 2.808504    | 2.80534     | 2.7485776   | 2.8262486   |
| "Kin"     | 6.0005007   | 6.498064    | 5.728503    | 6.072468    | 6.1511083   | 6.119757    | 6.05101     | 6.495967    |
| "Kirrel"  | 2.5058653   | 2.4654365   | 2.437017    | 2.4570398   | 2.4900475   | 2.5211694   | 2.4738173   | 2.4774203   |
| "Kit"     | 3.46952845  | 3.41118625  | 3.3442977   | 3.3698107   | 3.43661835  | 3.3461601   | 3.6840608   | 3.75542165  |
| "Kitl"    | 3.4264254   | 3.31490175  | 3.53445525  | 3.521662425 | 3.386256    | 3.7090425   | 3.627253125 | 3.332241025 |
| "Klb"     | 8.857801    | 8.883587    | 8.608677    | 9.007796    | 8.488225    | 8.732458    | 8.616516    | 8.811098    |
| "Klc1"    | 3.7930086   | 3.6079657   | 3.77768305  | 3.76523615  | 3.98110295  | 3.8605435   | 3.92254905  | 3.69222405  |
| "Klc3"    | 2.8578374   | 2.8429174   | 2.804457    | 2.7504714   | 2.8413815   | 2.8263917   | 2.8328707   | 2.8271453   |
| "Klc4"    | 4.835562    | 5.0087456   | 4.9271271   | 4.9939043   | 4.9762175   | 4.99684085  | 4.777875    | 4.7858411   |
| "Klf1"    | 4.5843487   | 6.4945545   | 5.134867    | 6.382973    | 6.6327825   | 5.6931086   | 5.345305    | 5.9793577   |
| "Klf10"   | 7.912534    | 8.228975    | 7.7649817   | 9.000151    | 9.375429    | 9.57196     | 9.151119    | 9.911561    |
| "Klf13"   | 8.20837485  | 6.927972    | 7.7639885   | 8.28002725  | 8.253839    | 6.7568823   | 7.447217    | 8.295754    |
| "Klf15"   | 10.699756   | 9.99382     | 9.712475    | 10.032043   | 10.102124   | 10.680086   | 9.95587     | 10.096817   |
| "Klf16"   | 2.7737014   | 2.7139874   | 2.7013865   | 2.7068298   | 2.7084928   | 2.784669    | 2.6495163   | 2.7216363   |
| "Klf17"   | 2.4226863   | 2.4012253   | 2.356587    | 2.3750236   | 2.4340315   | 2.4172068   | 2.4184365   | 2.4311416   |
| "Klf2"    | 9.484438    | 7.5049343   | 8.184873    | 7.781352    | 7.080964    | 7.3321843   | 7.0884      | 7.257546    |
| "Klf3"    | 7.488430167 | 6.525909833 | 6.270679    | 5.809941133 | 5.9062257   | 6.693773633 | 5.780706867 | 5.695663233 |
| "Klf4"    | 7.7672595   | 4.6725276   | 4.391744    | 4.3986823   | 4.2438783   | 3.9383838   | 4.50567485  | 4.43438675  |
| "Klf6"    | 8.311185667 | 5.3152152   | 6.8694008   | 6.030408767 | 5.365757133 | 5.516215267 | 5.684798567 | 5.16635667  |
| "Klf7"    | 6.69679015  | 5.801193425 | 6.481232775 | 6.34654785  | 5.9930941   | 5.734288425 | 6.42762365  | 6.1461572   |
| "Klf9"    | 9.238780357 | 9.024436543 | 8.058396914 | 8.555468829 | 8.844094371 | 9.204529543 | 8.677113229 | 8.891298714 |
| "Klhdc2"  | 8.9997285   | 8.6858375   | 8.622211    | 8.43409     | 8.504188    | 9.0873175   | 8.965742    | 8.883263    |
| "Klhdc3"  | 6.641008575 | 6.727590025 | 6.4638583   | 6.542526725 | 6.645585525 | 6.789878625 | 6.4955451   | 6.70742815  |
| "Klhdc4"  | 5.036342    | 5.0757236   | 5.157075    | 5.132347    | 4.894648    | 5.0949364   | 5.081647    | 4.973978    |
| "Klhdc5"  | 4.017626    | 5.813382    | 5.6622753   | 5.7020416   | 5.5946727   | 5.591696    | 6.1268315   | 5.7365694   |
| "Klhdc8a" | 2.9447427   | 2.6813486   | 2.6582808   | 2.609553    | 2.7023594   | 2.7006626   | 2.7005196   | 2.6893473   |
| "Klhl1"   | 2.451056    | 2.4257674   | 2.3418963   | 2.3768826   | 2.5098028   | 2.4454346   | 2.4372983   | 2.447709    |
| "Klhl13"  | 5.5214699   | 5.39199665  | 6.3039085   | 5.72780215  | 5.7277102   | 5.34198225  | 6.4335946   | 5.5139043   |
| "Klhl2"   | 9.612177    | 9.910496    | 8.4144      | 8.564351    | 8.479678    | 9.303018    | 9.180945    | 9.146977    |
| "Klhl21"  | 8.195471    | 8.064815    | 7.841009    | 8.504905    | 8.269368    | 8.538746    | 8.179675    | 8.240368    |
| "Klhl22"  | 6.925582    | 6.829775    | 6.9479856   | 7.3210917   | 6.9074216   | 7.2253523   | 7.142484    | 7.106207    |
| "Klhl24"  | 6.7322726   | 6.5503397   | 6.331542    | 6.884405    | 6.0557356   | 6.4450603   | 6.280129    | 6.97158     |
| "Klhl25"  | 4.2928367   | 3.4275374   | 3.182462    | 2.9493916   | 2.9708967   | 2.9946094   | 2.9716299   | 2.9646795   |
| "Klhl36"  | 2.466194    | 2.3632803   | 2.3226893   | 2.3346114   | 2.378094    | 2.729758    | 2.3908162   | 2.3700058   |
| "Klhl5"   | 8.335812    | 8.270039    | 8.869354    | 8.718612    | 8.905809    | 8.107245    | 8.84705     | 8.699475    |
| "Klhl7"   | 7.467301    | 7.2953706   | 6.698432    | 6.753436    | 7.244531    | 7.31972885  | 7.5943435   | 6.71596925  |
| "Klhl9"   | 9.522035    | 9.701466    | 10.033178   | 9.905496    | 9.841798    | 9.942084    | 10.077668   | 10.050475   |
| "Klk1"    | 3.597225833 | 3.040911967 | 4.994032867 | 4.158792967 | 3.583893867 | 5.7914869   | 3.271899433 | 3.5159707   |
| "Klk10"   | 2.6197438   | 2.5895987   | 2.4969213   | 2.5458267   | 2.6405025   | 2.6136549   | 2.5988476   | 2.6149583   |
| "Klk1b1"  | 2.3960013   | 2.3700848   | 2.3084881   | 2.3436182   | 2.3902535   | 2.382006    | 2.3821945   | 2.3761852   |
| "Klk1b11" | 2.3592303   | 2.3318334   | 2.2684155   | 2.2924519   | 2.3527024   | 2.3358083   | 2.3463454   | 2.4822617   |
| "Klk1b16" | 2.5949728   | 2.562004    | 2.5144877   | 2.5397334   | 2.581626    | 2.5752988   | 2.558382    | 2.571679    |
| "Klk1b21" | 2.8164308   | 2.8819351   | 3.7614167   | 2.78221     | 2.8355756   | 2.9400716   | 2.814456    | 2.8236856   |
| "Klk1b22" | 3.770422    | 3.623435    | 4.793864    | 4.2893505   | 4.277013    | 5.1890454   | 4.356617    | 4.3894567   |
| "Klk1b24" | 3.3087673   | 3.8316371   | 5.439468    | 4.859147    | 4.4317036   | 5.260293    | 3.3273952   | 3.925834    |
| "Klk1b27" | 2.600008    | 2.573637    | 2.5376348   | 2.57169     | 2.6035395   | 2.6024187   | 2.5649223   | 2.679944    |
| "Klk1b3"  | 2.558654    | 2.5177262   | 2.4318569   | 2.4817162   | 2.5459585   | 2.5430748   | 2.5376914   | 2.5619333   |
| "Klk1b4"  | 3.39441515  | 3.7152431   | 4.1455075   | 3.74138795  | 3.98095235  | 3.62158665  | 3.7951003   | 4.6935234   |
| "Klk1b8"  | 3.6610231   | 3.7807438   | 3.5335991   | 3.5973394   | 3.7812483   | 3.7805507   | 3.4229188   | 3.8976889   |
| "Klk6"    | 3.3930829   | 3.7669082   | 3.5317438   | 3.3030262   | 3.3363733   | 3.3300486   | 3.3307416   | 3.3246465   |
| "Klk7"    | 2.3753226   | 2.3499017   | 2.3062754   | 2.3044667   | 2.3696847   | 2.3634608   | 2.3731763   | 2.355818    |
| "Klkb1"   | 11.175932   | 12.270098   | 12.552675   | 12.933448   | 12.3160095  | 11.797601   | 12.81987    | 12.912051   |
| "Klra1"   | 2.7848665   | 2.77418315  | 2.6998781   | 2.7014958   | 2.84267615  | 2.86268725  | 2.7553586   | 2.8531512   |
| "Klra12"  | 2.751995    | 2.7499555   | 2.6502143   | 2.70483865  | 2.7613251   | 2.7588772   | 2.7410122   | 2.82094     |
| "Klra14"  | 3.1149545   | 3.1190279   | 2.9378273   | 3.0042686   | 3.212241    | 3.1809354   | 3.0594773   | 3.1919513   |
| "Klra15"  | 2.7616181   | 2.7325132   | 2.6250343   | 2.6704218   | 2.7728992   | 2.809271    | 2.7334762   | 2.7721481   |
| "Klra16"  | 3.14682545  | 3.1655266   | 2.9807609   | 3.04072605  | 3.26069535  | 3.2444197   | 3.09453065  | 3.2474084   |
| "Klra17"  | 2.5921054   | 2.4760046   | 2.834171    | 2.4393625   | 2.499539    | 2.4997025   | 2.4906526   | 2.4864717   |
| "Klra18"  | 2.9858263   | 2.9839587   | 2.8198812   | 2.8927193   | 3.0562713   | 3.051896    | 2.9879773   | 3.0185394   |
| "Klra19"  | 2.5548759   | 2.5268774   | 2.440393    | 2.4745176   | 2.5902824   | 2.55966     | 2.5251484   | 2.5912302   |
| "Klra2"   | 6.0294027   | 4.095206    | 5.931802    | 5.757623    | 4.201851    | 5.780828    | 5.8575573   | 5.640174    |
| "Klra20"  | 2.766799    | 2.7298644   | 2.6962461   | 2.6647255   | 2.7706556   | 2.7660983   | 2.7177422   | 2.769899    |
| "Klra3"   | 1.4999624   | 1.4595332   | 3.259221    | 1.4549586   | 1.4803518   | 1.4731817   | 1.4852879   | 1.4685273   |
| "Klra5"   | 2.411523    | 2.3794801   | 2.3041422   | 2.342876    | 2.411203    | 2.4049666   | 2.3954494   | 2.4118934   |
| "Klra7"   | 3.055399    | 3.0252218   | 2.8803847   | 3.0086696   | 3.0932713   | 3.153658    | 2.9820764   | 3.0835385   |
| "Klraq1"  | 6.982916    | 7.1330085   | 6.9595904   | 7.0614386   | 7.1800075   | 7.312324    | 7.408493    | 7.3895965   |
| "Klrb1a"  | 2.7398179   | 2.7100916   | 2.664593    | 2.6877544   | 2.7370486   | 2.7391107   | 2.7018566   | 2.7506204   |
| "Klrb1b"  | 3.0033631   | 3.000790833 | 2.846927533 | 2.914715033 | 3.080534167 | 3.080220867 | 2.8965027   | 3.0815136   |
| "Klrb1f"  | 2.4089804   | 2.376557    | 2.2856746   | 2.349179    | 2.3965676   | 2.3907692   | 2.3989472   | 2.3811257   |
| "Klrc1"   | 3.0004692   | 2.9779713   | 3.4928355   | 2.8247905   | 2.9987066   | 2.993161    | 2.9979954   | 3.1258395   |
| "Klrc2"   | 2.5359123   | 2.5101488   | 2.4201586   | 2.4543314   | 2.5743299   | 2.5649414   | 2.5065577   | 2.5972607   |
| "Klrc3"   | 2.3855872   | 2.357317    | 2.2868447   | 2.3186646   | 2.3814244   | 2.3887167   | 2.375898    | 2.3839304   |
| "Klrd1"   | 2.9521737   | 2.341556    | 2.887387    | 2.4704767   | 2.6894674   | 2.6293073   | 3.7205086   | 2.6758003   |
| "Klrg1"   | 2.3449545   | 2.3146827   | 2.281837    | 2.288622    | 2.3346837   | 2.4255676   | 2.3354735   | 2.3378367   |

|             |             |             |             |             |             |             |             |             |
|-------------|-------------|-------------|-------------|-------------|-------------|-------------|-------------|-------------|
| "Klrk1"     | 2.3577964   | 2.920007    | 3.5767314   | 3.334702    | 2.9645448   | 2.703843    | 3.0375707   | 2.9549189   |
| "Kmo"       | 10.906155   | 10.604438   | 10.762705   | 11.119148   | 11.140715   | 10.956178   | 11.056092   | 11.182102   |
| "Kng1"      | 13.992673   | 13.5713795  | 13.874789   | 13.6459715  | 13.7880985  | 13.730144   | 13.6527255  | 13.802529   |
| "Kpna1"     | 6.395124325 | 6.53706735  | 6.1276963   | 6.0485228   | 6.37555975  | 6.446681625 | 6.178097875 | 6.492875175 |
| "Kpna2"     | 10.046542   | 10.936422   | 10.221898   | 10.181445   | 10.736243   | 10.774841   | 10.322217   | 10.534596   |
| "Kpna3"     | 5.984728833 | 6.32561133  | 5.727762133 | 5.562961233 | 5.8237202   | 6.192142167 | 5.790168967 | 5.931200367 |
| "Kpna4"     | 7.78509     | 7.7586803   | 7.47892     | 8.128157    | 8.064349    | 8.452005    | 8.118943    | 8.262058    |
| "Kpna6"     | 4.73611015  | 5.2063936   | 5.00643435  | 4.8717425   | 5.03524735  | 4.85554055  | 4.9028471   | 4.8452657   |
| "Kpnb1"     | 7.802508167 | 8.0490525   | 7.901804667 | 7.740502333 | 7.85849     | 8.280356333 | 7.8557025   | 7.790105667 |
| "Kptn"      | 5.067194    | 4.977607    | 5.2863      | 5.5129056   | 5.2078576   | 5.197063    | 5.036612    | 5.743842    |
| "Kras"      | 6.05469245  | 5.8545513   | 5.851710525 | 5.7830077   | 5.5663979   | 5.5167665   | 5.49076785  | 5.4055714   |
| "Krbal1"    | 2.34757     | 2.7474213   | 2.721144    | 2.8528764   | 2.3395712   | 2.7581987   | 2.82878     | 2.8765159   |
| "Krcct1"    | 8.259168    | 8.640945    | 8.662553    | 8.447204    | 8.6604185   | 8.985265    | 8.988365    | 8.924023    |
| "Kri1"      | 5.454823    | 5.4467664   | 5.4637933   | 5.6357956   | 5.5568805   | 5.692552    | 5.2723227   | 5.4153094   |
| "Krit1"     | 6.882328    | 6.3267136   | 6.692922    | 6.7339354   | 6.972745    | 7.4893827   | 7.499196    | 6.2357836   |
| "Krr1"      | 6.0696264   | 5.481312    | 5.4949757   | 5.47486615  | 5.6960362   | 5.665322    | 5.63605485  | 5.6199707   |
| "Krt10"     | 3.390389    | 3.570219    | 3.5342638   | 3.8226962   | 3.6222196   | 3.921235    | 4.061541    | 3.4683535   |
| "Krt13"     | 2.416929    | 2.3969946   | 2.3145542   | 2.3682387   | 2.4155004   | 2.4085026   | 2.4188328   | 2.4090586   |
| "Krt16"     | 2.7297232   | 2.7037406   | 2.6500962   | 2.6789582   | 2.7374249   | 2.771271    | 2.7195456   | 2.7514875   |
| "Krt17"     | 2.70070575  | 2.6812617   | 2.6392927   | 2.653332    | 2.719473    | 2.716845    | 2.6697826   | 2.6884717   |
| "Krt18"     | 11.04612    | 11.28587    | 11.702417   | 11.180609   | 10.420113   | 10.886135   | 10.929924   | 11.047398   |
| "Krt19"     | 3.86973     | 2.8542557   | 3.3778758   | 2.710532    | 2.9003391   | 2.778074    | 2.6536944   | 2.8585186   |
| "Krt2"      | 2.3764348   | 2.3437376   | 2.2736635   | 2.3052697   | 2.3664265   | 2.3824732   | 2.3538866   | 2.3687687   |
| "Krt20"     | 2.5237818   | 2.499634    | 2.4279299   | 2.4813201   | 2.527234    | 2.510387    | 2.5145183   | 2.5039096   |
| "Krt23"     | 3.4870102   | 3.4751081   | 3.4204519   | 5.07855     | 4.340263    | 4.18959     | 5.8961935   | 4.548853    |
| "Krt25"     | 2.809545    | 2.8195863   | 2.6759892   | 2.6989732   | 2.8257928   | 2.8856065   | 2.7554188   | 2.8962135   |
| "Krt32"     | 2.1156106   | 2.0803545   | 2.3517118   | 2.066821    | 2.094312    | 2.0918798   | 2.1037436   | 2.0856972   |
| "Krt36"     | 2.3188868   | 2.283588    | 2.476747    | 2.2653248   | 2.3027737   | 2.2948945   | 2.3030326   | 2.3827653   |
| "Krt4"      | 2.2033043   | 1.8508422   | 2.4257228   | 2.3013458   | 2.1889853   | 2.178398    | 2.2411113   | 2.804732    |
| "Krt5"      | 3.2909892   | 3.3011177   | 3.1907966   | 3.2982426   | 3.3329475   | 3.369152    | 3.2311306   | 3.5571253   |
| "Krt6a"     | 2.7667482   | 2.737023    | 2.7273705   | 2.6781116   | 2.872098    | 2.7614362   | 2.724779    | 2.8112097   |
| "Krt7"      | 2.3661509   | 2.376158    | 2.2532504   | 2.3702195   | 2.7728145   | 2.2872157   | 2.6047163   | 2.474234    |
| "Krt79"     | 4.8805504   | 3.4434233   | 8.502388    | 6.113027    | 4.415157    | 2.9257302   | 7.3170047   | 5.461295    |
| "Krt8"      | 9.214992    | 9.749001667 | 10.885429   | 10.466967   | 9.521194333 | 9.354373333 | 10.11072167 | 10.10464233 |
| "Krt81"     | 2.2165391   | 2.179107    | 2.1765006   | 2.1782339   | 2.20758     | 2.2014608   | 2.1990485   | 2.5916305   |
| "Krt85"     | 2.518432    | 2.4847364   | 2.4371345   | 2.4683194   | 2.5102015   | 2.496372    | 2.50789     | 2.5025804   |
| "Krtap12-1" | 2.455122    | 2.423212    | 2.3559678   | 2.401822    | 2.4398565   | 2.4371965   | 2.4284644   | 2.4288473   |
| "Krtap16-1" | 2.4498892   | 2.4206502   | 2.340169    | 2.3918185   | 2.441235    | 2.4360914   | 2.4388793   | 2.4259076   |
| "Krtap16-2" | 2.3906364   | 2.3637896   | 2.3150039   | 2.3446078   | 2.3872402   | 2.3832848   | 2.3817036   | 2.3748982   |
| "Krtap16-3" | 2.4679599   | 2.4410108   | 2.37003135  | 2.39762405  | 2.4689152   | 2.48383855  | 2.4565513   | 2.46634625  |
| "Krtap16-5" | 2.5113626   | 2.4831524   | 2.395164    | 2.4313607   | 2.5075278   | 2.5109148   | 2.4891052   | 2.507841    |
| "Krtap16-7" | 2.9319885   | 2.905617    | 2.8338594   | 2.865446    | 3.0056136   | 2.9226072   | 2.8863528   | 2.9166217   |
| "Krtap3-1"  | 2.3521698   | 2.31813     | 2.2814634   | 2.302761    | 2.4687588   | 2.3343787   | 2.3398237   | 2.3275566   |
| "Krtap4-2"  | 3.0815556   | 3.052112    | 2.962437    | 3.0023146   | 3.0864458   | 3.0784628   | 3.053421    | 3.0914896   |
| "Krtap6-3"  | 2.4577363   | 2.4300063   | 2.3777082   | 2.38615     | 2.4551966   | 2.455643    | 2.4445944   | 2.443349    |
| "Krtap9-3"  | 2.6176107   | 2.5896254   | 2.5119398   | 2.5465245   | 2.6149652   | 2.6180148   | 2.5979002   | 2.615647    |
| "Krtcap2"   | 9.459655    | 9.81613325  | 10.1476185  | 9.895466    | 9.899415    | 9.722499    | 9.8621255   | 9.9448735   |
| "Kti12"     | 8.082156    | 7.6495337   | 7.198591    | 7.279425    | 7.8927584   | 7.882715    | 7.5323806   | 7.476636    |
| "Ktn1"      | 8.29551     | 9.123767    | 7.559289    | 7.7033195   | 8.067953    | 8.493534    | 8.498556    | 8.077746    |
| "Kynu"      | 3.7122953   | 3.7628367   | 3.594533    | 3.6728547   | 4.2041636   | 5.045539    | 3.7265813   | 4.333646    |
| "L2hgdh"    | 7.8978105   | 8.29491     | 8.036601    | 8.745996    | 8.551955    | 8.147749    | 8.355791    | 8.753261    |
| "l7Rn6"     | 7.1269765   | 6.7150576   | 6.95537935  | 7.0910718   | 6.55430875  | 7.439176    | 7.2770098   | 7.10733275  |
| "Lace1"     | 5.011126    | 5.3925123   | 5.4203415   | 5.4969926   | 5.1559725   | 5.110263    | 5.828859    | 5.6708107   |
| "Lactb"     | 9.139618    | 9.671734    | 9.450469    | 9.69183     | 9.93512     | 9.575922    | 9.781855    | 10.229258   |
| "Lactb2"    | 8.75553     | 9.61948825  | 9.561165    | 10.1365845  | 9.8148575   | 9.733649    | 10.27412075 | 10.5304885  |
| "Lad1"      | 2.3544517   | 6.31455     | 2.5177033   | 4.0737276   | 2.7382057   | 4.0436      | 2.7573254   | 2.4232416   |
| "Lage3"     | 6.853463    | 7.6567826   | 7.4434557   | 7.934807    | 7.731546    | 7.5034556   | 7.6486616   | 7.7083616   |
| "Lair1"     | 4.9639206   | 4.1797323   | 6.007019    | 5.2621655   | 4.567873    | 4.642821    | 4.8387513   | 4.59425     |
| "Lama1"     | 2.4846225   | 2.4781075   | 3.5267224   | 3.5197368   | 2.5313473   | 2.448616    | 3.6864164   | 2.5045547   |
| "Lama2"     | 3.6863601   | 3.6556222   | 3.6473775   | 3.640656    | 3.67492     | 3.9911392   | 3.6746588   | 3.6551957   |
| "Lama3"     | 2.0364618   | 4.937121    | 2.2273893   | 3.144864    | 2.0644007   | 4.526496    | 2.0636618   | 5.5026608   |
| "Lama4"     | 4.0666676   | 3.6337636   | 4.1088614   | 4.254586    | 4.1726375   | 4.388616    | 4.1776466   | 4.158361    |
| "Lamb1"     | 4.4964469   | 4.148400467 | 4.744744433 | 4.396259067 | 4.298588833 | 4.3706764   | 4.865655467 | 4.361667233 |
| "Lamb2"     | 3.6950338   | 3.632466    | 3.4297764   | 3.618001    | 3.8563719   | 3.6677673   | 3.6841888   | 4.1595526   |
| "Lamb3"     | 2.366974    | 2.5004125   | 2.275853    | 2.304984    | 2.3656623   | 2.3627446   | 2.3567302   | 2.3452253   |
| "Lamc1"     | 3.9338007   | 3.9310632   | 4.429862    | 4.2397046   | 3.8420982   | 3.878624    | 3.976675    | 4.7692566   |
| "Lamc2"     | 2.7578413   | 2.7246206   | 2.6518717   | 2.6840348   | 2.7736313   | 2.7354064   | 2.6973422   | 2.7291987   |
| "Lamp1"     | 12.866806   | 12.636198   | 12.96936    | 12.896594   | 12.782285   | 12.784443   | 12.686362   | 12.722315   |
| "Lamp2"     | 12.49224238 | 12.63685438 | 12.686445   | 12.92672175 | 12.9166725  | 12.86379325 | 13.28689825 | 12.95272638 |
| "Lamp3"     | 8.97178     | 8.041448    | 8.634024    | 8.445758    | 8.657461    | 9.006568    | 8.9109      | 8.766819    |
| "Lamtor2"   | 9.340401    | 9.480766    | 9.8795395   | 10.010493   | 9.747642    | 9.199534    | 9.854289    | 9.792859    |
| "Lamtor3"   | 8.042536    | 8.043518    | 7.9769473   | 8.238583    | 8.080611    | 8.321752    | 7.849446    | 8.016193    |
| "Lanc1"     | 5.273213    | 5.77788225  | 5.15682465  | 5.42346525  | 5.201565    | 5.60801615  | 5.2045675   | 5.3997281   |
| "Lanc2"     | 4.9649142   | 5.04917325  | 5.0481213   | 5.09604     | 4.7900063   | 4.8498833   | 4.8506991   | 4.8581224   |
| "Lap3"      | 10.952248   | 10.889028   | 11.151505   | 11.354013   | 10.846443   | 11.180619   | 11.0801325  | 11.542349   |
| "Laptnm4a"  | 11.272564   | 11.269372   | 11.474424   | 11.407473   | 11.234332   | 11.258523   | 11.089787   | 11.2497425  |
| "Laptnm4b"  | 8.5525842   | 8.434974467 | 8.383075233 | 8.5653548   | 8.5718458   | 8.769111667 | 9.035529333 | 8.486426333 |
| "Laptnm5"   | 8.603556    | 7.022348667 | 8.653900667 | 7.804323467 | 7.265634567 | 7.1145555   | 7.6841739   | 7.045906    |
| "Large"     | 3.89499825  | 3.9080336   | 4.09401765  | 3.86987125  | 3.7374297   | 3.7750208   | 3.7836018   | 3.87591485  |
| "Larp1"     | 9.586753    | 9.738065    | 9.918725    | 9.701581    | 9.8212185   | 10.050266   | 9.642628    | 9.529517    |
| "Larp1b"    | 9.611079    | 9.666164    | 9.627365    | 9.895115    | 9.7003      | 10.129659   | 9.850647    | 10.038907   |

|            |             |             |             |             |             |             |             |             |
|------------|-------------|-------------|-------------|-------------|-------------|-------------|-------------|-------------|
| "Larp4b"   | 9.3804225   | 9.8810435   | 9.43653975  | 9.7421085   | 9.872511    | 9.8191535   | 9.4675135   | 9.92334     |
| "Larp6"    | 2.510324    | 2.4811864   | 2.4334245   | 2.4409041   | 2.5017786   | 2.4923434   | 2.4993935   | 2.4865165   |
| "Larp7"    | 6.90682605  | 6.8563182   | 6.99505565  | 6.6522659   | 6.5653888   | 6.64807235  | 7.24219265  | 6.60748695  |
| "Lars"     | 7.9936633   | 8.7777779   | 8.5655315   | 8.191223    | 8.792689    | 8.91555     | 8.166445    | 8.187997    |
| "Las1l"    | 7.4196486   | 7.819196    | 7.559676    | 7.157748    | 7.7095985   | 7.511247    | 7.381925    | 7.410637    |
| "Lasp1"    | 7.085390744 | 6.953768922 | 8.055629556 | 7.6463236   | 6.876934856 | 6.814740344 | 7.967356    | 7.489613744 |
| "Lass2"    | 9.07617     | 9.344889    | 9.656122    | 9.842348    | 9.572533    | 9.136223    | 10.100386   | 9.995872    |
| "Lass4"    | 3.3316535   | 3.060467    | 3.11161025  | 3.01797125  | 2.9832153   | 3.521872    | 3.3069135   | 3.1927066   |
| "Lass5"    | 6.102322    | 6.1760726   | 6.6281056   | 6.394284    | 6.2670774   | 6.3396244   | 6.100049    | 5.871881    |
| "Lat"      | 2.8910131   | 2.855541    | 2.7800817   | 2.809945    | 3.2033668   | 3.2691574   | 2.8920174   | 2.8537111   |
| "Lat2"     | 2.6712236   | 2.63791     | 2.6068876   | 2.6158702   | 2.65729     | 2.647997    | 2.6603608   | 2.6420994   |
| "Lats1"    | 2.7244968   | 2.833418    | 2.593031    | 2.644435    | 2.767312    | 2.707535    | 2.717961    | 2.7008636   |
| "Lats2"    | 3.989921186 | 3.888498943 | 3.827479343 | 3.745617957 | 3.9014222   | 3.975004814 | 3.900300943 | 3.837011843 |
| "Lbh"      | 2.4861038   | 2.4509747   | 2.3882508   | 2.524371    | 2.4732275   | 2.5556316   | 2.4764085   | 2.4785686   |
| "Lbp"      | 12.230975   | 11.67625    | 12.0251465  | 11.227127   | 10.984078   | 11.690538   | 9.899864    | 9.966488    |
| "Lbr"      | 9.772668    | 8.653095    | 9.400708    | 8.595499    | 8.3481865   | 8.495195    | 8.65085     | 8.781078    |
| "Lcat"     | 10.961359   | 11.182394   | 10.78912    | 10.922783   | 11.29491    | 11.433329   | 10.623642   | 10.838178   |
| "Lce1a1"   | 3.2447592   | 3.2268788   | 3.0409157   | 3.1363293   | 3.2964078   | 3.344938    | 3.13730835  | 3.3379874   |
| "Lce1a2"   | 2.4822917   | 2.4569864   | 2.3961453   | 2.4251153   | 2.4799101   | 2.47292     | 2.4739108   | 2.4659      |
| "Lce1b"    | 2.6412153   | 2.6086879   | 2.561225    | 2.5838838   | 2.6331754   | 2.6466043   | 2.6311064   | 2.6130629   |
| "Lce1d"    | 3.1265688   | 3.1198273   | 2.9803846   | 3.0433502   | 3.2990704   | 3.3492672   | 3.0767384   | 3.21216     |
| "Lce1f"    | 2.5502272   | 2.542254    | 2.4435544   | 2.478197    | 2.5566406   | 2.595252    | 2.538373    | 2.550689    |
| "Lce1g"    | 2.6080406   | 2.580471    | 2.5288324   | 2.554527    | 2.6024814   | 2.5926397   | 2.6022978   | 2.5928662   |
| "Lce1h"    | 3.3784966   | 3.3709185   | 3.3301008   | 3.3896651   | 3.390302    | 3.4009893   | 3.3774896   | 3.3760018   |
| "Lce1i"    | 3.2402894   | 4.0320816   | 3.9669938   | 3.9977748   | 4.3294964   | 4.041368    | 4.056768    | 4.0388575   |
| "Lce1l"    | 3.2131748   | 3.1838636   | 3.0474806   | 3.0727775   | 3.2982519   | 3.2778883   | 3.1448967   | 3.26648     |
| "Lce3c"    | 2.897705    | 2.898395    | 2.8611207   | 2.8883364   | 2.9172702   | 2.988657    | 2.92003     | 2.90306     |
| "Lck"      | 3.2193115   | 3.0595095   | 3.4819474   | 3.124618    | 3.1601079   | 3.095243    | 3.2054007   | 3.0666268   |
| "Lclat1"   | 8.057692    | 8.404471    | 8.426849    | 8.709697    | 8.6437025   | 8.682968    | 9.172994    | 8.676534    |
| "Lcmt1"    | 5.4659204   | 5.7213593   | 5.9866743   | 6.2863126   | 5.2463503   | 5.5383368   | 5.7760754   | 5.772087    |
| "Lcmt2"    | 6.9214315   | 6.111188    | 6.130684    | 6.019392    | 6.2568927   | 6.3253903   | 6.52219     | 6.151716    |
| "Lcn13"    | 8.292033    | 7.91153     | 7.836286    | 5.755212    | 8.792623    | 10.095768   | 8.4293995   | 7.9925456   |
| "Lcn2"     | 13.809305   | 12.945855   | 14.025472   | 13.033704   | 12.408231   | 12.432198   | 9.284996    | 11.187268   |
| "Lcn3"     | 2.6613955   | 2.6252644   | 2.5474968   | 2.6145945   | 2.6477814   | 2.6375017   | 2.6494625   | 2.633088    |
| "Lcn5"     | 2.5910466   | 2.5558393   | 2.4613292   | 2.5043201   | 2.5789287   | 2.5753329   | 2.5794737   | 2.5689778   |
| "Lcor"     | 2.724091    | 2.704       | 2.58182     | 3.0738173   | 2.7073426   | 2.675679    | 2.717958    | 3.2264898   |
| "Lcorl"    | 6.8033338   | 6.0392494   | 5.1108794   | 5.42166     | 6.348013    | 6.8732185   | 6.0105934   | 5.78342     |
| "Lcp1"     | 8.163256    | 7.61289225  | 8.9849178   | 8.4751465   | 7.809372    | 7.8051255   | 7.8295472   | 8.06013225  |
| "Lcp2"     | 4.4519795   | 4.21007815  | 6.1621755   | 5.52999425  | 4.87363635  | 4.83175435  | 5.15770435  | 4.9542578   |
| "Ldb1"     | 5.3529487   | 6.532633    | 5.107142    | 5.3175354   | 5.7584677   | 5.489997    | 5.30048     | 5.401876    |
| "Ldb2"     | 4.8577256   | 4.0852404   | 4.859413    | 4.805743    | 4.7340465   | 4.845205    | 4.9850254   | 4.827332    |
| "Ldb3"     | 2.68585205  | 2.66770165  | 2.5717981   | 2.63854325  | 2.70426215  | 2.6913389   | 2.66137745  | 2.68733155  |
| "Ldha"     | 12.235776   | 12.217627   | 12.237945   | 11.869334   | 12.589227   | 12.413743   | 12.257902   | 12.151104   |
| "Ldhb"     | 4.144310675 | 4.177444325 | 4.108500175 | 3.9984687   | 4.314709825 | 4.206455    | 4.34826975  | 4.235141475 |
| "Ldhc"     | 2.4305906   | 2.398097    | 2.3464313   | 2.371289    | 2.416706    | 2.420959    | 2.4197161   | 2.401742    |
| "Ldlr"     | 8.6775685   | 7.8897842   | 8.06064025  | 8.0392527   | 7.1781695   | 6.38600885  | 8.1784962   | 7.908369    |
| "Ldlrap1"  | 5.3855896   | 6.12451     | 5.85397     | 5.9928117   | 5.810954    | 5.925362    | 5.825601    | 5.878064    |
| "Leap2"    | 5.217778    | 8.437862    | 9.045024    | 9.35341     | 10.184382   | 9.21629     | 10.273049   | 9.443628    |
| "Lect1"    | 6.262259    | 5.308727    | 4.946768    | 6.170929    | 5.1039486   | 4.401923    | 5.482096    | 8.054054    |
| "Lect2"    | 9.996992    | 9.981098    | 11.643925   | 11.13218    | 11.067906   | 8.315395    | 11.941661   | 11.186034   |
| "Lefty1"   | 2.712842    | 2.8456938   | 2.7990043   | 2.8012543   | 2.9502194   | 2.7056699   | 2.826983    | 2.812069    |
| "Lemd2"    | 7.604618    | 7.7695894   | 6.7898703   | 6.9137244   | 7.0059624   | 8.145964    | 6.9984093   | 6.9230256   |
| "Leng1"    | 6.2790327   | 6.0071144   | 6.0079575   | 5.8225536   | 5.8094287   | 5.8012905   | 5.642354    | 5.7313557   |
| "Leng8"    | 3.177467    | 3.2819567   | 3.1999722   | 3.129689    | 3.25349     | 3.2307742   | 3.1670072   | 3.157505    |
| "Lep"      | 2.4938173   | 2.4666028   | 2.4223523   | 2.4192455   | 2.4932709   | 2.4876828   | 2.4794183   | 2.481911    |
| "Lepr"     | 8.951594    | 5.93151265  | 4.0969648   | 2.6298044   | 6.429204    | 7.226574    | 3.37161575  | 2.63640225  |
| "Lepre1"   | 4.4251703   | 4.2218598   | 4.1300529   | 4.09972675  | 4.11607515  | 4.2012775   | 3.9694208   | 4.1376704   |
| "Lepre4"   | 2.637277    | 2.603612    | 2.5772238   | 2.5828662   | 2.6182327   | 2.851674    | 2.6229327   | 2.6111789   |
| "Leprot"   | 10.14016233 | 8.220892833 | 8.989052667 | 8.621690333 | 8.385802767 | 8.456877833 | 8.636531333 | 8.440794333 |
| "Leprotl1" | 7.53437755  | 7.7277115   | 7.9829745   | 7.6033602   | 7.19540865  | 7.325953    | 7.66373435  | 7.266298    |
| "Letm1"    | 4.705462167 | 5.187138267 | 4.848060433 | 4.8713745   | 5.027592267 | 5.085165533 | 4.948335433 | 4.908107867 |
| "Letmd1"   | 5.8842745   | 6.6664195   | 6.1484237   | 6.217962    | 6.185374    | 6.5199547   | 6.059782    | 6.265541    |
| "Lfng"     | 3.2078338   | 3.2169268   | 3.5924864   | 3.7476401   | 3.193566    | 3.1845827   | 3.2413378   | 3.223008    |
| "Lgals1"   | 6.8251693   | 7.74259925  | 8.3030395   | 8.051465    | 6.88031135  | 5.37194895  | 8.278471    | 7.8329565   |
| "Lgals12"  | 2.47842255  | 2.4737534   | 2.3962253   | 2.4342434   | 2.49645335  | 2.50363435  | 2.48639335  | 2.7253603   |
| "Lgals2"   | 3.03196515  | 2.7960107   | 2.846737    | 2.7727569   | 2.8161229   | 2.80311775  | 2.7814641   | 2.90200355  |
| "Lgals3"   | 10.030304   | 8.3762455   | 9.686386    | 9.042931    | 8.583511    | 8.270685    | 8.352782    | 8.033758    |
| "Lgals3bp" | 8.531714    | 7.5201707   | 8.975558    | 8.830456    | 7.9954343   | 7.5490108   | 8.186433    | 7.9532895   |
| "Lgals4"   | 4.0819273   | 6.4175105   | 4.5135202   | 5.5194306   | 7.763133    | 7.4248595   | 6.102703    | 6.619734    |
| "Lgals8"   | 8.88409325  | 9.543915    | 8.93411675  | 9.2145211   | 9.0110478   | 9.2878795   | 8.4959938   | 8.75189835  |
| "Lgals9"   | 8.0307455   | 8.136417    | 8.950468    | 8.946245    | 8.741614    | 8.049123    | 9.117651    | 8.832513    |
| "Lgi1"     | 2.5246496   | 2.4947      | 2.424418    | 2.452842    | 2.5243638   | 2.5209315   | 2.5080104   | 2.5149598   |
| "Lgi4"     | 2.5065162   | 2.480476    | 2.4447546   | 2.4649606   | 2.501713    | 2.50991     | 2.4897444   | 2.4905012   |
| "Lgmn"     | 10.669018   | 9.150557    | 10.662251   | 9.9458885   | 9.988744    | 9.720955    | 9.576618    | 9.580971    |
| "Lgr5"     | 3.732917    | 2.7591515   | 3.6659842   | 3.694225    | 2.6375318   | 2.8711543   | 5.1374397   | 4.678511    |
| "Lhpp"     | 7.3189507   | 7.992905    | 6.3318977   | 7.5741153   | 7.829633    | 7.6148343   | 8.036798    | 6.7996497   |
| "Lhx1"     | 2.6427548   | 2.608859    | 2.5134318   | 2.5498657   | 2.634605    | 2.669493    | 2.6097388   | 2.6284127   |
| "Lhx2"     | 3.6139455   | 3.1762338   | 3.895148    | 3.4648085   | 4.239202    | 3.49814     | 4.517643    | 3.475351    |
| "Lhx6"     | 3.503693    | 3.5098186   | 3.4040623   | 3.4806914   | 3.5006657   | 3.4863362   | 3.4306788   | 3.5625143   |
| "Lhx8"     | 2.829253    | 2.818088    | 2.7722168   | 2.728496    | 2.8371603   | 2.8417568   | 2.822614    | 2.8212748   |
| "Lhx9"     | 2.43341055  | 2.4052825   | 2.35947505  | 2.3843623   | 2.42557075  | 2.42433015  | 2.4281629   | 2.4108423   |

|                |             |             |             |             |             |             |             |             |
|----------------|-------------|-------------|-------------|-------------|-------------|-------------|-------------|-------------|
| "Lias"         | 8.238949    | 8.644571    | 8.157355    | 8.379717    | 8.745972    | 8.579983    | 8.537615    | 8.366881    |
| "Lifr"         | 8.6140379   | 8.956016333 | 8.633084667 | 9.1096967   | 8.2702682   | 8.706571667 | 9.245771233 | 9.536743467 |
| "Lig1"         | 2.9033198   | 2.9758537   | 3.7263372   | 3.1456091   | 2.8272507   | 2.97923     | 3.2933326   | 2.9827342   |
| "Lig3"         | 3.66703555  | 3.9267969   | 4.057606625 | 3.7902369   | 3.9112482   | 3.965266475 | 3.91177725  | 3.8739819   |
| "Lilrb3"       | 7.981665    | 6.2172856   | 8.069082    | 7.1880903   | 6.742133    | 7.719022    | 6.364682    | 6.2467327   |
| "Lima1"        | 5.508495567 | 6.330895267 | 6.758223867 | 7.020981133 | 6.615766767 | 6.670269967 | 7.032792333 | 7.1380415   |
| "Limch1"       | 2.6899798   | 2.6579118   | 2.6196566   | 2.6453981   | 2.6868687   | 2.7041843   | 2.685504    | 2.6903427   |
| "Limd1"        | 7.7098575   | 7.7934408   | 8.1467735   | 8.0347485   | 8.043775    | 7.9217997   | 8.0297355   | 8.192903    |
| "Limd2"        | 5.076835967 | 4.3256977   | 6.260033833 | 6.0392947   | 5.282505433 | 4.611665733 | 5.657471833 | 5.547514833 |
| "Lime1"        | 3.535747    | 3.4659484   | 3.3796594   | 3.4398501   | 3.48506485  | 3.56984345  | 3.4816605   | 3.4807328   |
| "Limk1"        | 3.1804174   | 3.18559235  | 3.09495295  | 3.0673891   | 3.20108115  | 3.1615764   | 3.16300155  | 3.2042457   |
| "Limk2"        | 2.6726117   | 2.3958633   | 2.626817    | 2.3800285   | 2.3796005   | 2.4049454   | 2.4146793   | 2.3984623   |
| "Lims1"        | 5.956822867 | 5.5350247   | 6.3176067   | 5.940224333 | 5.840149933 | 5.743855533 | 6.0438881   | 5.813357633 |
| "Lims2"        | 8.653182    | 9.338783    | 8.341409    | 8.975131    | 8.78808     | 9.105416    | 8.697695    | 8.706228    |
| "Lin28a"       | 2.4629765   | 2.4351854   | 2.3709698   | 2.4004738   | 2.4574752   | 2.4528708   | 2.4501896   | 2.4488764   |
| "Lin37"        | 3.2400208   | 3.2409892   | 3.2150664   | 3.2383442   | 3.3680782   | 3.7646863   | 3.238063    | 3.269582    |
| "Lin7b"        | 2.9864846   | 2.9883468   | 2.931011333 | 2.964010733 | 3.0266319   | 3.028433933 | 2.9706853   | 3.057596667 |
| "Lin7c"        | 6.827433    | 7.020977933 | 6.4314087   | 6.6627269   | 6.803857533 | 6.687554433 | 6.779444567 | 7.031916867 |
| "Lin9"         | 3.6035287   | 3.815205    | 3.6361372   | 4.0083523   | 3.772905    | 3.8519487   | 3.9864893   | 4.5026846   |
| "Lingo1"       | 2.342376    | 2.3454425   | 2.2488737   | 2.2743232   | 2.3937368   | 2.3285704   | 2.3322144   | 2.3226058   |
| "Lipa"         | 8.350319433 | 8.742315333 | 9.721588167 | 9.652576333 | 9.406193    | 9.209588667 | 10.39018783 | 9.601326    |
| "Lipc"         | 1.0426922   | 1.0158585   | 1.070304    | 1.0881321   | 10.5545635  | 10.396466   | 10.921586   | 11.031592   |
| "Lipe"         | 2.6014009   | 2.569955    | 2.5254736   | 2.8552592   | 2.6038642   | 2.617061    | 2.5792594   | 2.5674539   |
| "Lipp"         | 3.2036543   | 5.84237565  | 3.575378    | 4.42071395  | 6.5906765   | 4.59388325  | 3.773918    | 5.2668853   |
| "Lipt1"        | 4.279106    | 5.1504416   | 5.0681434   | 5.077255    | 5.3106904   | 4.9299974   | 5.261222    | 5.3077145   |
| "Lipt2"        | 5.0785046   | 5.5369163   | 5.075526    | 4.881601    | 4.92934     | 5.092847    | 5.129423    | 5.1117315   |
| "LitaF"        | 10.231371   | 9.449629    | 10.113364   | 9.3649225   | 9.09313     | 9.24289     | 8.641669    | 8.51772575  |
| "Ligl1"        | 6.3894696   | 5.7491007   | 5.9941015   | 5.9632955   | 5.922407    | 6.121666    | 5.9842114   | 6.1197715   |
| "Ugl2"         | 5.3594117   | 5.7969737   | 5.842511    | 5.1309733   | 5.1041155   | 5.820706    | 5.654865    | 5.3277      |
| "Lman1"        | 8.4157149   | 9.087723425 | 9.08395975  | 8.892257    | 9.390101    | 8.856356675 | 8.808035875 | 9.1801655   |
| "Lman2"        | 7.973841    | 8.1216345   | 8.2122705   | 8.48065     | 8.9634585   | 8.3334365   | 8.736918    | 8.488254    |
| "Lmbr1"        | 5.8177085   | 6.585092    | 6.0533648   | 5.9451265   | 6.00319     | 6.3987026   | 5.8845816   | 6.213329    |
| "Lmbr11"       | 3.9755397   | 3.9161732   | 3.6569343   | 3.9131858   | 3.9370134   | 3.992747    | 3.8974066   | 3.9268785   |
| "Lmbrd1"       | 8.34591465  | 8.3166685   | 7.92290815  | 8.1875075   | 8.01956085  | 8.40341015  | 8.22717     | 8.4165015   |
| "Lmf1"         | 6.439191    | 7.1962414   | 7.5170836   | 7.661802    | 7.095749    | 7.0900364   | 7.4978085   | 7.858371    |
| "Lmna"         | 3.642549825 | 3.7245504   | 3.847658125 | 3.708179175 | 3.825993775 | 3.72654085  | 3.7386663   | 3.67490275  |
| "Lmnb1"        | 3.9954029   | 3.8262767   | 4.14279135  | 4.63662805  | 4.0389883   | 3.86103925  | 4.34056185  | 4.0747392   |
| "Lmnb2"        | 2.3904173   | 2.3659618   | 2.3199763   | 2.3404036   | 2.384331    | 2.3786347   | 2.3784347   | 2.3722541   |
| "Lmo2"         | 7.132516    | 5.7556047   | 8.229284    | 7.705424    | 7.3811574   | 6.895717    | 7.8436985   | 7.3526106   |
| "Lmo4"         | 7.159197    | 7.73825     | 6.579236    | 6.9668474   | 6.7301264   | 7.083107    | 6.2873273   | 6.875882    |
| "Lmo7"         | 6.494936    | 6.3861713   | 7.0718904   | 6.7404914   | 6.7099614   | 6.0611596   | 7.418942    | 7.054372    |
| "Lmod2"        | 2.4510794   | 2.4200883   | 2.3253684   | 2.3884473   | 2.4424877   | 2.4388847   | 2.4258614   | 2.4295979   |
| "Lnx1"         | 3.15175545  | 3.47991525  | 5.0684553   | 4.76188255  | 4.0041093   | 3.53901955  | 4.4002705   | 4.2038181   |
| "Lnx2"         | 8.940879    | 6.367315    | 6.186555    | 5.3234663   | 5.5741086   | 6.007883    | 6.049681    | 5.2301326   |
| "LOC100038937" | 2.9391413   | 2.936554    | 2.7018654   | 2.9512746   | 3.2180448   | 3.0379374   | 2.9201453   | 2.9994273   |
| "LOC100039014" | 2.7468243   | 2.6916645   | 2.6823633   | 2.6966953   | 2.7317696   | 2.747581    | 2.7337177   | 2.7166438   |
| "LOC100043315" | 2.7278495   | 2.7033267   | 2.591734    | 2.636161    | 2.7379751   | 2.7476504   | 2.7000747   | 2.7333012   |
| "LOC100044627" | 12.535173   | 12.528919   | 12.25554483 | 12.16866575 | 12.1328125  | 12.33223138 | 11.82259965 | 12.17092738 |
| "LOC100044656" | 3.0055866   | 2.9993145   | 2.9285514   | 2.9115143   | 3.0394194   | 3.0302985   | 2.9705985   | 3.0404496   |
| "LOC100044742" | 10.686253   | 9.4787185   | 9.359259    | 9.9839345   | 9.846937    | 9.8189725   | 8.856254    | 9.82407925  |
| "LOC100044900" | 8.362114    | 8.899908    | 8.996132    | 8.641504    | 8.409881    | 8.453144    | 8.497339    | 8.745216    |
| "LOC100045367" | 12.914663   | 12.885317   | 12.893654   | 12.654957   | 12.520018   | 12.74395    | 12.333157   | 12.576732   |
| "LOC100045924" | 5.3963585   | 6.9226956   | 6.724889    | 7.0938187   | 6.673096    | 6.0331635   | 7.258737    | 6.5377865   |
| "LOC100045999" | 9.540538833 | 9.744156617 | 9.7172115   | 9.244126833 | 9.33974405  | 9.39150855  | 9.5754953   | 9.198544183 |
| "LOC100046151" | 12.5285015  | 12.512596   | 12.332371   | 12.159086   | 12.3967905  | 12.491986   | 12.332279   | 12.474068   |
| "LOC100046187" | 11.59721    | 11.91387    | 10.872507   | 11.424462   | 11.235163   | 12.357312   | 11.691241   | 11.887595   |
| "LOC100046223" | 12.8707265  | 13.001738   | 12.679677   | 12.6097635  | 12.597588   | 12.6977895  | 12.271558   | 12.5870465  |
| "LOC100046297" | 12.989686   | 13.148847   | 12.91427    | 12.648482   | 12.742929   | 13.045464   | 12.6199875  | 12.717188   |
| "LOC100046628" | 12.2044795  | 12.066537   | 11.216794   | 11.26221875 | 11.8172985  | 12.074101   | 11.22048    | 11.4508275  |
| "LOC100046650" | 10.22861467 | 10.95793233 | 10.89078367 | 11.05456133 | 10.99147167 | 10.52871033 | 10.892947   | 10.967093   |
| "LOC100046899" | 2.6408675   | 2.6045659   | 2.502357    | 2.5964816   | 2.6243794   | 2.6280937   | 2.6064923   | 2.6249301   |
| "LOC100047252" | 2.805654    | 2.8608249   | 2.6913478   | 2.72801825  | 2.82006565  | 4.48021665  | 2.77585485  | 2.80457375  |
| "LOC100047468" | 2.3813553   | 2.3476665   | 2.2857943   | 2.316731    | 2.3691077   | 2.3632886   | 2.3588107   | 2.3551285   |
| "LOC100047518" | 8.00471935  | 7.8990825   | 8.5705965   | 8.00051875  | 8.01512185  | 7.55039325  | 8.2742122   | 8.08338415  |
| "LOC100048263" | 4.3753495   | 4.161647    | 4.21796475  | 4.1069008   | 3.66542465  | 4.40028515  | 4.14288325  | 3.609292    |
| "LOC100048499" | 8.598485    | 8.26697     | 8.125772    | 8.01704     | 8.14398     | 8.107119    | 8.193966    | 8.036314    |
| "LOC100048662" | 13.402148   | 13.34514417 | 13.32616867 | 13.49960833 | 13.45092267 | 13.13643233 | 13.525294   | 13.349456   |
| "LOC100048884" | 11.080362   | 14.520787   | 8.949146    | 14.949152   | 14.623442   | 14.951881   | 14.852496   | 15.307756   |
| "LOC100135765" | 2.6146092   | 3.7007766   | 3.320036    | 3.3835897   | 2.5769043   | 2.7078917   | 3.6113963   | 3.013997    |
| "LOC100502777" | 2.5341775   | 2.6032574   | 2.559951    | 2.4682457   | 2.5120828   | 2.5095718   | 2.503055    | 2.5038512   |
| "LOC100503235" | 10.641762   | 10.806721   | 10.228294   | 10.324027   | 10.683783   | 10.707397   | 10.80963    | 10.404104   |
| "LOC100503296" | 9.1683995   | 8.49467     | 7.6915224   | 7.6803118   | 8.4308845   | 8.63943535  | 7.4909588   | 7.7577065   |
| "LOC100504784" | 6.1071663   | 5.8943706   | 6.0340786   | 5.8566513   | 5.776419    | 5.8967896   | 5.8865614   | 5.894       |
| "LOC100504988" | 10.35411875 | 10.4214255  | 9.9834795   | 9.9542465   | 10.0198615  | 9.9980345   | 9.8165825   | 10.0285625  |
| "LOC100504922" | 7.633852    | 7.744237    | 6.9156738   | 7.15966885  | 7.7871305   | 7.6579545   | 7.18934865  | 7.59022215  |
| "LOC100504968" | 10.051165   | 10.688911   | 10.53308    | 10.698993   | 10.666769   | 10.338926   | 10.758082   | 10.856486   |
| "LOC100504988" | 9.91108925  | 9.903332    | 9.93125     | 9.81283375  | 9.74936125  | 9.82825575  | 9.948567    | 9.61338025  |
| "LOC100505002" | 2.60562025  | 2.57834025  | 2.5039386   | 2.53826895  | 2.60851385  | 2.6069733   | 2.5850308   | 2.6025808   |
| "LOC100505015" | 12.288059   | 13.218199   | 13.019593   | 12.770411   | 12.830604   | 12.981218   | 12.509013   | 12.830544   |
| "LOC100505031" | 7.73280525  | 7.7790976   | 7.64810415  | 7.45324165  | 7.519868    | 7.6999785   | 7.3507673   | 7.6032      |
| "LOC100505062" | 6.18146965  | 5.85241695  | 5.814549    | 5.93448015  | 5.60930675  | 5.75315915  | 6.02812015  | 5.8661587   |

|                |             |             |             |             |             |             |             |             |
|----------------|-------------|-------------|-------------|-------------|-------------|-------------|-------------|-------------|
| "LOC100505149" | 7.735014    | 7.6737704   | 8.088452    | 7.9169755   | 7.592959    | 7.8086004   | 7.8718476   | 7.840809    |
| "LOC100505160" | 5.152648    | 4.88914085  | 5.5439283   | 5.2416528   | 5.2132731   | 5.22907825  | 5.4025556   | 5.3329484   |
| "LOC100505293" | 9.392954    | 9.566929    | 9.109176    | 9.160486    | 9.466677    | 9.528177    | 8.805435    | 9.248203    |
| "LOC100653389" | 2.40231     | 2.4025612   | 2.3466814   | 2.31209     | 2.5442104   | 2.4136724   | 2.424436    | 2.4964995   |
| "LOC100861640" | 2.5520344   | 2.5386763   | 2.5001748   | 2.5085638   | 2.555068    | 2.5470862   | 2.548531    | 2.5398667   |
| "LOC100861650" | 3.271207    | 3.2930582   | 3.2333033   | 3.27469     | 3.3262584   | 3.305682    | 3.3036313   | 3.3592684   |
| "LOC100861749" | 4.40093265  | 5.4317358   | 5.0503015   | 4.90129685  | 4.34055585  | 4.8040133   | 4.52028035  | 4.0231625   |
| "LOC100861758" | 5.4396343   | 4.9735155   | 5.039798    | 5.0563684   | 5.032569    | 5.148745    | 5.1073704   | 5.100693    |
| "LOC100861853" | 10.287937   | 10.134715   | 9.365163    | 9.862616    | 10.05131    | 9.463842    | 10.066215   | 9.513596    |
| "LOC100861858" | 3.7190247   | 2.6247919   | 2.656091    | 2.4866467   | 2.703751    | 2.5822287   | 2.963629    | 2.5448256   |
| "LOC100862012" | 13.1398946  | 13.2420214  | 13.6156619  | 13.410962   | 13.3850566  | 13.266318   | 13.6086747  | 13.308781   |
| "LOC100862072" | 2.3762338   | 2.339466    | 2.3436298   | 2.2947154   | 2.36521     | 2.359676    | 2.3611465   | 2.353084    |
| "LOC100862515" | 6.219946    | 5.3706126   | 5.879121    | 5.686536    | 5.49816     | 5.780425    | 5.570128    | 5.823873    |
| "LOC100862583" | 5.5865464   | 6.1381335   | 5.395293    | 5.4442554   | 5.791965    | 5.9041786   | 6.2053843   | 5.730354    |
| "LOC10086284"  | 2.3805108   | 2.351809    | 2.2813015   | 2.330555    | 2.3748264   | 2.36874     | 2.3685858   | 2.3618376   |
| "LOC100862594" | 8.883793    | 8.25546     | 8.828844    | 8.599953    | 8.318883    | 8.633862    | 8.666642    | 8.404876    |
| "LOC100862618" | 7.536932    | 8.490035    | 8.388902    | 8.564921    | 8.609539    | 8.430965    | 8.505305    | 8.664465    |
| "LOC171588"    | 2.4863603   | 2.4606273   | 2.390345    | 2.4281747   | 2.479267    | 2.4786582   | 2.4896023   | 2.476853    |
| "LOC269472"    | 2.3551295   | 2.315596    | 2.260651    | 2.2907052   | 2.364645    | 2.3297615   | 2.3375554   | 2.6426332   |
| "LOC541456"    | 3.3426178   | 3.0978806   | 2.9078817   | 2.9922473   | 3.1436486   | 3.1843696   | 3.0239177   | 3.1701224   |
| "LOC624295"    | 2.291085    | 2.7950292   | 2.6207435   | 2.7596202   | 2.8151107   | 2.8133056   | 2.8170853   | 2.8000872   |
| "LOC632465"    | 9.13634375  | 9.3899765   | 9.142605    | 9.0474995   | 9.087628    | 8.8132565   | 9.079549    | 8.881379    |
| "LOC634555"    | 5.615452    | 6.6099205   | 6.284401    | 6.5512443   | 6.000551    | 6.423707    | 6.6316876   | 6.2608504   |
| "LOC635087"    | 11.6081385  | 11.88759725 | 11.57833575 | 11.7939595  | 11.67843    | 11.709576   | 12.03265075 | 11.88122125 |
| "LOC636306"    | 9.9591895   | 9.623111    | 9.020017    | 9.2482735   | 9.5260265   | 9.6061455   | 9.2178395   | 9.2521305   |
| "LOC637202"    | 2.4756622   | 2.4761696   | 2.4042864   | 2.423975    | 2.4743462   | 2.4705524   | 2.4615414   | 2.4671068   |
| "LOC637796"    | 7.658456167 | 7.5856007   | 7.391668533 | 7.4603022   | 7.411446    | 7.590688    | 7.519901533 | 7.5822441   |
| "LOC638399"    | 11.89569725 | 11.83579653 | 11.7590405  | 11.66603588 | 11.67644213 | 11.67698638 | 11.5659895  | 11.55947853 |
| "LOC639905"    | 4.71053755  | 4.68748105  | 4.571768    | 4.48870415  | 4.63696865  | 4.68817485  | 4.4209009   | 4.40074115  |
| "LOC639910"    | 2.9464438   | 2.9298759   | 2.7782192   | 2.8434353   | 2.9993207   | 2.965667    | 2.9014597   | 3.0012798   |
| "LOC641050"    | 2.3918004   | 2.3688562   | 2.3425903   | 2.3184743   | 2.3903315   | 2.3860512   | 2.3740888   | 2.3791041   |
| "LOC664787"    | 2.7203138   | 2.7004046   | 2.653823    | 2.6718104   | 2.7068083   | 2.6962135   | 2.696998    | 2.6917639   |
| "LOC665506"    | 3.2625702   | 2.810113125 | 3.483701225 | 3.196878525 | 3.03373815  | 2.974127475 | 3.234078125 | 3.176487475 |
| "LOC673151"    | 6.556688    | 6.3692245   | 6.6573124   | 6.502287    | 7.2431602   | 7.1226196   | 6.772408    | 7.072923    |
| "LOC676708"    | 3.172332    | 3.129745    | 3.0749016   | 3.1203456   | 3.1813781   | 3.178742    | 3.1210735   | 3.2096076   |
| "LOC677113"    | 10.1603639  | 10.07428033 | 10.10574993 | 9.927724167 | 9.7540528   | 9.9218264   | 9.854613333 | 9.8643976   |
| "LOC677654"    | 11.579233   | 12.05735    | 11.930438   | 12.3126     | 12.228326   | 11.675459   | 12.121202   | 12.174761   |
| "Loh12crl1"    | 5.297131    | 5.3958416   | 5.2257514   | 5.2022457   | 5.2739654   | 5.4192977   | 5.2790313   | 5.108424    |
| "Lonp1"        | 8.96591     | 9.152658    | 9.244611    | 9.406606    | 9.401186    | 9.370361    | 9.490238    | 9.29891     |
| "Lonp2"        | 6.3097299   | 8.33182645  | 8.31665885  | 8.2774605   | 8.72307475  | 8.409514    | 8.97202225  | 8.5638754   |
| "Lor"          | 2.6589514   | 2.4214822   | 2.4450669   | 2.39286495  | 2.4416365   | 3.0447402   | 2.3938638   | 2.42646775  |
| "Lox"          | 2.6772747   | 2.6432161   | 2.5918393   | 2.6198182   | 2.6616752   | 2.6573725   | 2.6604974   | 2.6472578   |
| "Loxl1"        | 2.6251345   | 2.590252    | 2.623402    | 2.59472     | 2.6101575   | 1.8458322   | 2.6156054   | 2.5946267   |
| "Loxl3"        | 3.253632    | 3.3136096   | 3.2769809   | 3.2925866   | 3.3000877   | 3.314105    | 3.3305182   | 3.4778147   |
| "Loxl4"        | 2.1890123   | 2.1723812   | 2.530216    | 2.1459155   | 2.1784148   | 2.1848485   | 2.2083528   | 2.17895     |
| "Lpar1"        | 4.38516335  | 3.0964754   | 2.896294    | 2.967793    | 3.2096834   | 3.1173706   | 3.04209185  | 2.97892785  |
| "Lpar3"        | 2.6342971   | 2.7523422   | 2.5014098   | 2.5600812   | 2.6213386   | 2.6101892   | 2.6166043   | 2.61132     |
| "Lpar4"        | 2.4108164   | 2.3905978   | 2.3096051   | 2.3513994   | 2.4114513   | 2.4018147   | 2.4003487   | 2.3967648   |
| "Lpcat1"       | 4.436655633 | 4.109949967 | 5.033497567 | 4.2335332   | 4.140425967 | 4.385866867 | 4.390911767 | 4.070446467 |
| "Lpcat3"       | 8.649548    | 9.744182    | 8.885178    | 9.753426    | 9.704105    | 9.822666    | 9.705283    | 10.098902   |
| "Lpgat1"       | 10.3765385  | 10.71385338 | 10.987433   | 10.7609625  | 10.6527705  | 10.7625855  | 10.338456   | 10.04075225 |
| "Lphn1"        | 1.8475057   | 1.7924728   | 2.1629877   | 1.7963641   | 1.8333751   | 1.7987452   | 2.5060883   | 1.8133675   |
| "Lpin1"        | 13.5514345  | 13.8242225  | 11.03823    | 11.30074425 | 13.6234095  | 13.8485815  | 11.112143   | 11.331863   |
| "Lpin2"        | 10.65210233 | 10.57657433 | 8.918814533 | 9.478118    | 10.26609483 | 10.97797833 | 8.8317828   | 9.8390361   |
| "Lpin3"        | 2.5059729   | 2.4688675   | 2.441666    | 2.4572756   | 2.4859152   | 2.4790487   | 2.8822856   | 2.475606    |
| "Lpl"          | 8.16313425  | 7.01056625  | 11.328693   | 8.694035    | 8.22179     | 7.125432    | 8.8861958   | 8.618408    |
| "Lpp"          | 7.2516513   | 7.54696615  | 7.40854215  | 7.494232125 | 7.4643979   | 7.42800975  | 7.6554243   | 7.241029    |
| "Lpxn"         | 5.423001    | 5.1743      | 6.112003    | 5.574365    | 5.2091618   | 5.0395155   | 5.0746117   | 4.460437    |
| "Lrat"         | 5.9636235   | 5.5724177   | 6.396997    | 6.05398     | 6.8061624   | 6.2989993   | 7.2809916   | 6.612337    |
| "Lrba"         | 4.38225315  | 4.9501134   | 5.06269115  | 5.13896645  | 4.90365155  | 4.466635    | 5.0287094   | 5.1582828   |
| "Lrg1"         | 13.001441   | 12.632396   | 13.383394   | 12.505123   | 13.181971   | 13.213414   | 12.325119   | 12.542612   |
| "Lrig1"        | 6.219045    | 5.691868933 | 5.669603767 | 5.891413067 | 5.957687967 | 5.921078933 | 5.7140915   | 6.2936258   |
| "Lrmp"         | 5.6843967   | 4.6429567   | 5.9751263   | 5.437352    | 5.174361    | 4.791586    | 5.0374928   | 4.5157166   |
| "Lrp1"         | 8.935417    | 9.033727    | 10.041317   | 9.960282    | 9.840007    | 8.768347    | 9.995975    | 10.208345   |
| "Lrp10"        | 8.276592    | 8.223788    | 7.895277    | 8.091821    | 8.1701975   | 8.490255    | 7.9284124   | 7.9581337   |
| "Lrp2"         | 2.8440962   | 2.8477993   | 2.7064624   | 2.737669    | 2.9108748   | 2.8778381   | 2.7909145   | 2.9112675   |
| "Lrp4"         | 6.0928116   | 6.415629    | 6.030654    | 7.1879253   | 7.243634    | 6.462707    | 6.9612865   | 7.160566    |
| "Lrp5"         | 2.8863873   | 2.852556    | 2.797695    | 2.8265312   | 2.875597    | 2.866722    | 3.0528073   | 2.865772    |
| "Lrp6"         | 6.8333764   | 7.0863645   | 6.5845993   | 6.8517222   | 6.87933115  | 6.83336835  | 6.91507     | 7.06492375  |
| "Lrpa1"        | 7.99437085  | 7.82686565  | 8.1269069   | 7.938903975 | 8.089905375 | 7.689405875 | 7.83340175  | 7.91472185  |
| "Lrpprc"       | 9.174142    | 9.359941    | 9.277382    | 9.071982    | 9.651031    | 9.503267    | 9.3544855   | 9.76275     |
| "Lrr1"         | 2.77757405  | 2.83388245  | 2.7290706   | 2.74830615  | 2.7923325   | 2.7838631   | 2.7467102   | 2.78255465  |
| "Lrrc1"        | 2.581913    | 2.5422778   | 2.5200086   | 2.5336819   | 2.600808    | 2.6106508   | 2.5158937   | 2.5540705   |
| "Lrrc14"       | 4.8238506   | 5.150212    | 5.0788383   | 5.345412    | 4.706339    | 5.0990033   | 5.31336     | 5.334069    |
| "Lrrc16a"      | 6.0241704   | 7.359195    | 4.540578    | 4.844014    | 6.2288957   | 5.9614162   | 4.3530703   | 5.7121077   |
| "Lrrc18"       | 2.664472    | 2.6492903   | 2.6126807   | 2.6329446   | 2.6715553   | 2.7034483   | 2.673133    | 2.6571217   |
| "Lrrc2"        | 2.6178236   | 2.588487    | 2.5175953   | 2.5490782   | 2.6113222   | 2.6130776   | 2.6061177   | 2.5998626   |
| "Lrrc20"       | 4.3566413   | 4.8371034   | 4.337158    | 4.4594045   | 4.499531    | 4.4174156   | 4.304763    | 4.409939    |
| "Lrrc33"       | 5.859433    | 5.649332    | 7.2074394   | 6.171579    | 5.991171    | 6.056727    | 5.9960136   | 5.614194    |
| "Lrrc3b"       | 2.41195     | 2.399096    | 2.3171349   | 2.377479    | 2.4178503   | 2.4112089   | 2.4054239   | 2.4107163   |
| "Lrrc4"        | 2.5978198   | 2.5721602   | 2.5042658   | 2.5187213   | 2.5999942   | 2.5971508   | 2.5934017   | 2.5822337   |

|           |             |             |             |             |             |             |             |             |
|-----------|-------------|-------------|-------------|-------------|-------------|-------------|-------------|-------------|
| "Lrrc40"  | 6.782511    | 6.9756913   | 7.2711043   | 7.445816    | 6.938326    | 6.5134954   | 7.3089805   | 7.3588204   |
| "Lrrc41"  | 6.847013    | 7.5550294   | 7.1567607   | 7.144765    | 6.9143333   | 7.030465    | 6.8122897   | 6.3251605   |
| "Lrrc42"  | 7.114455    | 7.1339293   | 8.247691    | 7.5837317   | 7.0304503   | 7.303533    | 7.246314    | 7.878277    |
| "Lrrc46"  | 2.7563841   | 3.101043    | 2.6451628   | 2.7046018   | 2.7850776   | 2.782082    | 2.7490132   | 2.7267785   |
| "Lrrc49"  | 2.5973868   | 2.5681188   | 2.5005627   | 2.5169342   | 2.5948389   | 2.59483     | 2.577588    | 2.5933123   |
| "Lrrc51"  | 2.5006773   | 3.2824252   | 2.41189     | 3.222474    | 2.5003126   | 2.7795296   | 2.4870977   | 2.4821239   |
| "Lrrc56"  | 2.455596    | 2.5606613   | 2.1308813   | 2.4455445   | 2.484226    | 2.4775345   | 2.4458325   | 2.8698547   |
| "Lrrc57"  | 5.5521135   | 5.607806    | 5.5696754   | 6.1838913   | 5.5186253   | 5.334908    | 6.0259576   | 5.412545    |
| "Lrrc58"  | 11.9118185  | 11.482607   | 10.398903   | 10.420064   | 10.647013   | 11.147581   | 10.871327   | 10.863322   |
| "Lrrc59"  | 7.4747435   | 7.9431867   | 8.015208    | 7.1657405   | 7.8746775   | 7.35446325  | 7.17775235  | 7.071347    |
| "Lrrc6"   | 2.6695447   | 2.6417437   | 2.5342865   | 2.5783231   | 2.678087    | 2.6855745   | 2.6383069   | 2.679796    |
| "Lrrc61"  | 3.50738     | 3.6949692   | 3.5539312   | 3.9284263   | 3.8458803   | 3.8935654   | 3.7633963   | 3.8297145   |
| "Lrrc8a"  | 9.2981475   | 9.296641    | 8.66795     | 8.9354675   | 9.0069425   | 9.254064    | 8.4563495   | 8.6763235   |
| "Lrrc8c"  | 3.8599515   | 2.717732    | 2.763376    | 2.6505165   | 2.7126997   | 2.7173965   | 2.7119803   | 2.6372643   |
| "Lrrfip1" | 6.4557363   | 6.360118167 | 6.176861433 | 5.9802166   | 6.0317039   | 6.525751333 | 6.0392865   | 5.732182233 |
| "Lrrfip2" | 8.914653    | 9.136965    | 8.192005    | 8.870013    | 8.643761    | 9.282656    | 8.405691    | 8.814599    |
| "Lrriq4"  | 2.3792956   | 2.3421383   | 2.2764466   | 2.3297772   | 2.371478    | 2.3669083   | 2.363953    | 2.3601108   |
| "Lrrk1"   | 4.454061333 | 4.177879433 | 4.991051067 | 4.8510135   | 4.750122133 | 4.3963465   | 4.863733067 | 4.7477805   |
| "Lrrk2"   | 2.458116    | 2.4199994   | 2.407638    | 2.4390185   | 2.4462662   | 2.432822    | 2.4532764   | 2.4363754   |
| "Lrrn1"   | 2.590164    | 2.5598042   | 2.4832375   | 2.515709    | 2.6054208   | 2.5868268   | 2.579361    | 2.666521    |
| "Lrrtm1"  | 2.42881525  | 2.40258225  | 2.3257133   | 2.3754704   | 2.42603075  | 2.4224864   | 2.4161614   | 2.4148587   |
| "Lrrtm2"  | 2.8664818   | 2.8535924   | 2.7123747   | 2.7822683   | 2.8651714   | 2.865448    | 2.8422084   | 2.869073    |
| "Lrwd1"   | 5.8025568   | 5.3688046   | 5.38602945  | 5.27144275  | 5.322755    | 5.97748175  | 5.5445073   | 5.41490975  |
| "Lsg1"    | 6.8489056   | 6.608371    | 6.2763205   | 6.2690063   | 6.579041    | 6.4117208   | 6.2950563   | 6.121683    |
| "Lsm1"    | 8.046722    | 8.432184    | 8.34825     | 8.178224    | 8.461708    | 8.506776    | 7.9670153   | 8.292546    |
| "Lsm10"   | 7.705117    | 7.455538    | 7.6793165   | 7.3830028   | 6.726264    | 7.8674145   | 7.1416154   | 7.4015183   |
| "Lsm12"   | 4.339286    | 5.223016    | 4.411587    | 4.7960505   | 3.499153    | 4.2876825   | 4.2322125   | 3.9891076   |
| "Lsm14a"  | 2.4990156   | 2.4679282   | 2.3903196   | 2.4252894   | 2.51817     | 2.4896028   | 2.4881194   | 2.5035312   |
| "Lsm14b"  | 7.2888103   | 7.8941383   | 6.8493423   | 7.688997    | 7.5013485   | 8.044309    | 7.6141114   | 7.7279353   |
| "Lsm2"    | 3.515438    | 3.5867445   | 3.550746    | 3.85509     | 3.4958298   | 3.5178335   | 3.6103373   | 4.0564437   |
| "Lsm3"    | 6.9332914   | 7.3659215   | 7.46002     | 7.326363    | 6.5382247   | 6.6127377   | 6.8333926   | 6.6408362   |
| "Lsm4"    | 8.741185    | 8.931538    | 8.658313    | 8.585785    | 8.381919    | 8.748888    | 8.46235     | 8.763603    |
| "Lsm7"    | 8.03948     | 8.335875    | 8.088514    | 8.05241     | 8.208377    | 8.176434    | 8.10778     | 8.229387    |
| "Lsmd1"   | 9.094161    | 9.258622    | 9.5161      | 9.6071005   | 9.267405    | 9.324181    | 9.568179    | 9.540723    |
| "Lsp1"    | 3.3609285   | 3.2766693   | 3.611608    | 3.3089104   | 3.3371992   | 3.3457778   | 3.3491414   | 3.4130745   |
| "Lsr"     | 9.100666    | 8.93549     | 9.25553     | 9.434089    | 8.785449    | 8.947662    | 8.755266    | 9.169479    |
| "Lss"     | 7.8067505   | 6.776820833 | 7.813996667 | 6.6046413   | 5.2294242   | 5.043017333 | 5.741383067 | 6.9747137   |
| "Lst1"    | 7.193922    | 4.3192844   | 8.555838    | 7.5345097   | 6.324166    | 5.924836    | 7.091521    | 6.7430873   |
| "Lta"     | 2.307975    | 2.273425    | 2.2093117   | 2.4594796   | 2.2949505   | 2.2874231   | 2.29568     | 2.282065    |
| "Lta4h"   | 5.623752    | 5.78091665  | 6.0707823   | 5.8668554   | 5.6963034   | 5.882955    | 6.0081991   | 5.79857775  |
| "Ltb"     | 4.8122196   | 3.5179708   | 6.036532    | 5.512194    | 5.3155746   | 4.6620317   | 5.5439005   | 5.0205936   |
| "Ltb4r1"  | 2.3641317   | 2.3313246   | 2.2638595   | 2.3065698   | 2.3499548   | 2.64599     | 2.3537006   | 2.3338253   |
| "Ltb4r2"  | 3.1679442   | 3.9906197   | 2.5180411   | 2.4960797   | 2.5814812   | 2.6617923   | 2.524259    | 2.559336    |
| "Ltbp1"   | 3.714606    | 3.3684916   | 3.2187185   | 3.2803197   | 3.5010471   | 3.3849072   | 3.3988996   | 3.4076946   |
| "Ltbp3"   | 3.9229338   | 3.98872685  | 3.788018    | 3.863404    | 3.77907575  | 3.99337505  | 3.78487685  | 3.6604067   |
| "Ltbp4"   | 3.236923    | 3.1852036   | 3.254241    | 3.603719    | 3.2896707   | 3.173408    | 3.2943623   | 3.790306    |
| "Ltbr"    | 7.5666904   | 8.431379    | 8.259898    | 8.492904    | 8.3121395   | 8.349922    | 8.01626     | 8.352891    |
| "Ltf"     | 6.1753616   | 2.388827    | 5.623605    | 3.7168853   | 2.4220629   | 5.5853834   | 2.4370406   | 2.4285836   |
| "Ltn1"    | 6.02781135  | 6.1929749   | 6.00435085  | 6.24122875  | 6.219648    | 6.0905798   | 6.147517225 | 6.08359185  |
| "Ltv1"    | 8.621988    | 8.751093    | 8.072754    | 7.906851    | 8.29941     | 8.78012     | 7.8571024   | 7.714045    |
| "Luc7l"   | 7.720159333 | 6.7221988   | 6.340725667 | 6.541756233 | 6.742088    | 6.956484767 | 6.344112733 | 6.596183633 |
| "Luc7l2"  | 8.721969375 | 8.763190875 | 8.400193425 | 8.7012219   | 8.95182075  | 8.81015325  | 8.8342665   | 8.797072    |
| "Luc7l3"  | 6.689503    | 9.2882475   | 9.285339    | 9.08146     | 9.510782    | 9.5977725   | 9.35568225  | 9.49852975  |
| "Lum"     | 7.536572    | 6.4120393   | 7.6906457   | 6.7239385   | 7.52134     | 6.630566    | 7.8194733   | 6.800021    |
| "Luzp1"   | 5.9961198   | 5.59605715  | 5.84999075  | 5.88222625  | 5.80580125  | 5.82745695  | 5.76469235  | 5.61441495  |
| "Lxn"     | 4.453513    | 4.040832    | 5.655966    | 5.2385383   | 4.4036593   | 4.1106906   | 5.1865973   | 4.8733244   |
| "Ly6a"    | 9.48314     | 8.06904     | 12.739229   | 11.949841   | 8.209503    | 7.497808    | 9.370929    | 8.991296    |
| "Ly6c1"   | 7.0539227   | 6.6308827   | 9.97007     | 9.233644    | 6.1546564   | 6.3345304   | 6.2770157   | 5.860437    |
| "Ly6d"    | 6.479546    | 7.3053174   | 10.974933   | 8.274952    | 7.513623    | 5.9811306   | 5.2989697   | 4.4247246   |
| "Ly6f"    | 2.4148564   | 2.386427    | 2.4238021   | 2.3711796   | 2.399712    | 2.3959966   | 2.4050927   | 2.3939219   |
| "Ly6h"    | 2.5478733   | 2.5111022   | 2.4671674   | 2.476038    | 2.5348587   | 2.5213854   | 2.5189931   | 2.5277095   |
| "Ly6i"    | 2.9505377   | 2.943959    | 2.8929183   | 2.9380257   | 3.0068731   | 2.9597635   | 2.9403195   | 2.9987216   |
| "Ly75"    | 3.481581    | 3.3179908   | 4.2099686   | 3.8812463   | 3.72318     | 3.7133114   | 3.645299    | 3.7464786   |
| "Ly86"    | 9.72442     | 7.428153    | 10.28509    | 9.540519    | 8.130796    | 8.240328    | 9.224603    | 8.614137    |
| "Ly9"     | 3.5334733   | 3.3239286   | 4.655018    | 3.888934    | 3.4872313   | 3.2953289   | 3.4676433   | 3.4830246   |
| "Ly96"    | 5.1319904   | 4.9386272   | 6.4196754   | 6.167985    | 5.141342    | 5.6830683   | 6.476809    | 5.7227697   |
| "Lyar"    | 7.446195    | 7.7159543   | 7.0047755   | 6.8794675   | 7.212125    | 7.6579437   | 6.9105744   | 7.292096    |
| "Lyl1"    | 2.7512364   | 2.5085928   | 3.448409    | 2.9572794   | 2.6711507   | 2.7473288   | 2.7313535   | 2.7405186   |
| "Lypla1"  | 11.380078   | 11.570399   | 11.126442   | 11.6441965  | 11.485486   | 11.221237   | 11.810016   | 11.656041   |
| "Lypla2"  | 7.5284595   | 7.578953    | 7.505011    | 7.6665554   | 7.560704    | 7.5686016   | 7.467256    | 7.5593824   |
| "Lyplal1" | 6.836654    | 7.366297    | 7.8861055   | 8.245081    | 8.00788     | 7.0404406   | 8.265545    | 8.097068    |
| "Lyrm1"   | 4.026637    | 4.5834694   | 3.509763    | 3.8267682   | 4.18269     | 4.8234673   | 3.8877203   | 3.8180602   |
| "Lyrm2"   | 6.6845505   | 7.3740766   | 7.2094245   | 7.145066    | 7.00497765  | 6.77832785  | 7.3042045   | 6.63134     |
| "Lyrm5"   | 8.1457565   | 8.049596    | 7.5878635   | 8.1135526   | 8.3150909   | 8.1038155   | 8.6423755   | 7.9229925   |
| "Lysmd1"  | 4.7358274   | 4.7604713   | 4.2144933   | 4.7279873   | 4.5517545   | 5.1679115   | 4.8287063   | 4.645164    |
| "Lysmd2"  | 3.1277456   | 2.7737303   | 2.9109707   | 2.779057    | 2.81455     | 2.808393    | 2.8213453   | 2.8033726   |
| "Lysmd3"  | 9.261637    | 8.479788    | 8.126441    | 8.085717    | 8.964433    | 8.884314    | 8.553565    | 8.594961    |
| "Lyst"    | 4.249953267 | 4.4110051   | 4.31955833  | 4.389537167 | 4.4815717   | 4.437733033 | 4.443539933 | 4.618971667 |
| "Lyve1"   | 9.730906    | 8.655973    | 7.5864185   | 8.0157767   | 8.1084233   | 9.587327    | 7.81276515  | 7.668241    |
| "Lyzt1"   | 9.732159933 | 8.3842125   | 9.665543867 | 9.4924246   | 9.140448833 | 8.775580467 | 9.2502935   | 9.0352885   |
| "Lyzt2"   | 12.682873   | 9.93795     | 12.333064   | 12.133456   | 11.225259   | 10.778783   | 11.532996   | 11.1600685  |

|             |             |             |             |             |             |             |             |             |
|-------------|-------------|-------------|-------------|-------------|-------------|-------------|-------------|-------------|
| "Lztf11"    | 5.81137135  | 5.50863815  | 5.4652295   | 5.54012345  | 5.2999398   | 5.4862501   | 5.645216    | 4.9665341   |
| "Lztr1"     | 6.2945147   | 6.3122987   | 6.268502    | 6.572469    | 6.511858    | 6.520074    | 6.66799285  | 6.4717078   |
| "Lzts2"     | 5.109634    | 6.0291786   | 6.178903    | 6.201783    | 5.5507975   | 6.6947784   | 6.3053856   | 5.8287334   |
| "M6pr"      | 8.35799975  | 7.9613707   | 8.8817775   | 8.37876465  | 8.35824865  | 7.94042     | 8.18631835  | 8.38789615  |
| "Mab2111"   | 2.3929858   | 2.3622918   | 2.2997353   | 2.3221538   | 2.3847346   | 2.3783655   | 2.3790028   | 2.3713398   |
| "Macf1"     | 8.104379    | 7.67451825  | 7.5585075   | 7.76938865  | 7.4871963   | 7.59215075  | 7.61347     | 7.7747503   |
| "Macrodi1"  | 8.397884    | 8.862459    | 8.330081    | 9.118954    | 9.171722    | 7.9496374   | 9.157752    | 9.347862    |
| "Macro2"    | 3.2002806   | 3.21925115  | 3.1940034   | 3.28753435  | 3.23112915  | 3.23258435  | 3.5488814   | 3.22593495  |
| "Mad211bp"  | 6.4490337   | 6.4204617   | 6.2571416   | 6.2381735   | 6.342961    | 6.3693233   | 6.0092573   | 6.7813964   |
| "Mad2l2"    | 7.5738964   | 7.870795    | 7.6586933   | 7.3293414   | 6.935475    | 7.588699    | 7.763422    | 7.4637403   |
| "Madd"      | 2.9255562   | 4.2476096   | 4.1708493   | 4.4713526   | 4.2013917   | 4.2800174   | 4.1783743   | 4.5564284   |
| "Maea"      | 4.80507995  | 4.7659288   | 4.7083199   | 4.73792235  | 4.581556    | 4.5276115   | 4.63918085  | 4.61147535  |
| "Maf1"      | 8.07432215  | 7.3099506   | 6.88276615  | 7.02091     | 7.02506995  | 7.35301945  | 6.594916    | 7.1763711   |
| "Mafb"      | 7.75595375  | 6.8634958   | 6.6429303   | 6.85137465  | 7.275401    | 7.8516425   | 6.9403635   | 6.48310845  |
| "Maff"      | 8.982677    | 2.7494369   | 3.470609    | 4.6780376   | 3.8911173   | 5.399427    | 4.7845154   | 5.558256    |
| "Mafg"      | 8.26159385  | 7.4889925   | 7.71917285  | 7.953807    | 7.5246953   | 7.743115    | 7.33073865  | 7.6776465   |
| "Mafk"      | 7.4317784   | 5.987779    | 6.102814    | 6.3211894   | 5.913328    | 5.673952    | 5.701632    | 5.9972463   |
| "Magea1"    | 2.5598147   | 2.545859    | 2.487837    | 2.5134227   | 2.5605085   | 2.5536425   | 2.542777    | 2.5444567   |
| "Magea4"    | 2.5732064   | 2.5435796   | 2.4603667   | 2.5299      | 2.5798545   | 2.5702937   | 2.5733433   | 2.567305    |
| "Magea7-ps" | 2.537304    | 2.499081    | 2.452441    | 2.4606755   | 2.5191896   | 2.5130656   | 2.5003946   | 2.5073369   |
| "Mageb3"    | 2.4007764   | 2.3726501   | 2.3279583   | 2.3332283   | 2.3909693   | 2.3884027   | 2.3696313   | 2.3881059   |
| "Maged1"    | 8.636353    | 9.200664    | 9.178423    | 8.583979    | 8.623568    | 8.901936    | 8.552685    | 8.595231    |
| "Maged2"    | 4.6070347   | 4.107355    | 4.651247    | 4.6079974   | 4.6435413   | 4.5406613   | 5.0439796   | 4.628631    |
| "Mageh1"    | 4.7222495   | 3.9661825   | 4.739994    | 4.107914    | 4.7256317   | 4.434135    | 5.330217    | 4.410646    |
| "Maged2"    | 2.6239588   | 2.613501    | 2.5772417   | 2.5479255   | 2.67211     | 2.6706877   | 2.6131473   | 2.6017907   |
| "Magi1"     | 4.002122133 | 3.774587533 | 3.657294533 | 3.848535567 | 3.871394667 | 3.869615533 | 4.0299944   | 4.111466733 |
| "Magi2"     | 2.455389    | 2.4167838   | 2.3935945   | 2.3655677   | 2.4680853   | 2.434823    | 2.4246657   | 2.430041    |
| "Magi3"     | 3.81599535  | 3.77589875  | 3.52500845  | 3.6165904   | 3.8831082   | 4.0351157   | 3.8032186   | 3.8534384   |
| "Magix"     | 2.389945    | 2.3772802   | 2.302715    | 2.8642144   | 2.1316993   | 2.3912716   | 2.3911664   | 2.164021    |
| "Magoh"     | 9.663251    | 9.685733    | 9.660962    | 9.300178    | 9.369602    | 9.344028    | 9.361828    | 9.303444    |
| "Magohb"    | 6.021542    | 6.2019687   | 6.1882806   | 5.819601    | 6.040482    | 6.2515926   | 6.408555    | 5.971003    |
| "Magt1"     | 6.8892465   | 6.7310348   | 7.732246    | 7.7873936   | 8.0689335   | 7.3728046   | 7.6570473   | 7.8127837   |
| "Mak16"     | 8.255682    | 7.7957044   | 7.2356796   | 7.10001     | 7.6114473   | 7.757394    | 7.0794473   | 7.3639464   |
| "Mal"       | 2.4897552   | 2.4605074   | 2.4169354   | 2.4394696   | 2.482014    | 2.468965    | 2.4825253   | 2.4635324   |
| "Mal2"      | 6.522065    | 8.052459    | 7.7503667   | 6.999256    | 7.80883     | 7.560799    | 8.256174    | 7.4419904   |
| "Malat1"    | 10.18077234 | 10.381952   | 10.22693814 | 10.5350755  | 10.4335932  | 10.14559126 | 10.22421    | 10.22018394 |
| "Maml1"     | 4.969581    | 4.8501553   | 4.75352835  | 4.94303045  | 4.9315933   | 4.937113    | 4.8949711   | 4.9968635   |
| "Man1a"     | 11.687127   | 11.0116735  | 11.180224   | 11.5109695  | 11.3057995  | 11.5102115  | 11.2850565  | 11.31836    |
| "Man1a2"    | 4.2588211   | 4.57465025  | 4.7594404   | 4.1834092   | 4.21463265  | 4.39031105  | 4.2175862   | 4.1593735   |
| "Man1b1"    | 3.322604    | 3.0307643   | 3.238073    | 3.4732518   | 3.4094188   | 3.338578    | 3.3009448   | 3.3069975   |
| "Man2a1"    | 11.205177   | 11.280848   | 10.921255   | 11.186262   | 11.2193165  | 11.405219   | 10.523212   | 11.015549   |
| "Man2b1"    | 6.97229325  | 7.0966192   | 7.9059305   | 7.8136303   | 7.6948508   | 7.55959485  | 7.4385105   | 7.5240478   |
| "Man2b2"    | 5.0582695   | 4.828454    | 4.9264045   | 5.1762404   | 4.9616776   | 4.934653    | 4.814878    | 4.558379    |
| "Man2c1"    | 6.75283145  | 7.3783342   | 7.186231    | 7.0708189   | 7.16310265  | 7.3923345   | 6.91704025  | 7.09534965  |
| "Manba"     | 6.881176    | 6.55016     | 7.6619544   | 7.221191    | 7.347465    | 6.620894    | 7.617078    | 7.7706165   |
| "Manbal"    | 4.579757    | 5.0266876   | 4.280593    | 4.6738367   | 4.52642     | 4.4114127   | 4.3958397   | 4.3885694   |
| "Manf"      | 9.303337    | 9.975671    | 10.458954   | 9.452319    | 11.572619   | 10.700316   | 9.797919    | 10.229308   |
| "Manscl1"   | 3.4522586   | 3.9980426   | 4.3320637   | 4.24788     | 4.1783643   | 4.170477    | 5.369025    | 4.1744847   |
| "Maoa"      | 6.217027    | 6.146583    | 6.525408    | 5.3047495   | 6.9980392   | 5.5890293   | 6.9615397   | 6.3233232   |
| "Map11c3a"  | 8.094622    | 8.506743    | 7.564585    | 7.5922503   | 8.044975    | 8.367909    | 7.5806932   | 7.6178513   |
| "Map11c3b"  | 10.1843681  | 9.427070625 | 9.013804    | 8.883847325 | 8.938346525 | 9.1405604   | 8.638774075 | 8.746121625 |
| "Map2k1"    | 9.091132    | 9.178862    | 9.333075    | 8.91078     | 8.996473    | 9.132954    | 9.243394    | 9.124088    |
| "Map2k2"    | 7.2672605   | 7.79812225  | 7.035389    | 7.2489428   | 7.63963     | 7.62718115  | 7.0949795   | 7.3944307   |
| "Map2k3"    | 7.480687    | 7.62075925  | 7.4588698   | 7.4935085   | 7.5360025   | 7.1316055   | 7.055111    | 7.2846275   |
| "Map2k4"    | 5.31574045  | 5.9930959   | 6.0301443   | 5.5156806   | 5.31837815  | 5.0375457   | 5.1741561   | 5.1549902   |
| "Map2k5"    | 5.205346433 | 5.472010767 | 4.939796    | 5.2435701   | 5.462511733 | 5.5319074   | 5.474636167 | 6.041429567 |
| "Map2k6"    | 5.0674367   | 4.7466025   | 3.796432    | 4.850956    | 4.7639136   | 3.9608684   | 4.530037    | 5.3573074   |
| "Map2k7"    | 4.89049415  | 4.8650313   | 4.81389975  | 4.795968425 | 4.919676725 | 4.874584175 | 5.192412375 | 4.994101325 |
| "Map3k1"    | 6.023734    | 5.5414844   | 6.0603485   | 5.719851    | 5.3161883   | 5.5417066   | 5.510488    | 5.422793    |
| "Map3k11"   | 5.9018908   | 5.57078     | 5.8095517   | 5.537038    | 6.107175    | 5.771718    | 5.7703648   | 5.767948    |
| "Map3k12"   | 4.163602867 | 4.195984233 | 3.9973249   | 4.0306779   | 4.207045    | 4.2134517   | 4.1694477   | 4.169995033 |
| "Map3k14"   | 2.9963474   | 2.9921744   | 3.060741    | 3.0700698   | 3.0171752   | 3.0778835   | 2.4489288   | 2.9103072   |
| "Map3k3"    | 5.192847867 | 4.897013367 | 4.8767234   | 4.952006833 | 5.005110333 | 4.981139633 | 4.965982267 | 4.759631633 |
| "Map3k4"    | 4.37614335  | 4.1468934   | 4.5899874   | 4.74897025  | 4.3826747   | 4.2240374   | 4.9775844   | 4.6237955   |
| "Map3k5"    | 8.392871    | 8.314514    | 6.2718463   | 7.004113    | 7.352521    | 7.695983    | 7.0659814   | 7.3060617   |
| "Map3k6"    | 5.8813972   | 5.019155    | 2.9821558   | 2.915702    | 3.254044    | 4.187348    | 2.9691746   | 3.012626    |
| "Map3k7"    | 4.57784188  | 4.81042758  | 4.540352    | 4.73873502  | 5.02292938  | 4.92691036  | 4.82701074  | 4.86548708  |
| "Map3k8"    | 5.714817    | 3.7902758   | 6.4267187   | 5.9509354   | 5.0569706   | 4.717578    | 5.4729595   | 5.0068536   |
| "Map4k1"    | 2.3869362   | 2.3266234   | 2.2866135   | 2.3814414   | 2.3505905   | 2.3513427   | 2.342768    | 2.3360388   |
| "Map4k2"    | 2.703924    | 2.66736795  | 2.62387935  | 2.6427967   | 2.6936866   | 2.7191324   | 2.6928684   | 2.68439495  |
| "Map4k3"    | 9.290846    | 9.320474    | 9.294189    | 9.3087635   | 9.115937    | 9.492169    | 9.29472     | 9.162609    |
| "Map4k4"    | 3.5413079   | 3.261192567 | 3.4795233   | 3.4089327   | 3.538587733 | 3.643427033 | 3.427292267 | 3.4174888   |
| "Map4k5"    | 4.932697233 | 4.379438533 | 4.039086667 | 4.235860433 | 4.4587249   | 4.524000667 | 4.264285633 | 4.565649867 |
| "Mapk1"     | 7.8592545   | 7.71815515  | 7.8425715   | 7.89135065  | 7.8414655   | 8.1487127   | 7.87709     | 7.93558535  |
| "Mapk10"    | 2.6681725   | 2.65275035  | 2.55789295  | 2.59769805  | 2.69743315  | 2.6830864   | 2.64457585  | 2.67989425  |
| "Mapk11"    | 2.4670248   | 2.439555    | 2.3722568   | 2.3958993   | 2.4691515   | 2.4660811   | 2.456235    | 2.4629102   |
| "Mapk12"    | 4.0629033   | 3.5946267   | 4.468096    | 4.093983    | 4.096541    | 4.041571    | 4.4399514   | 4.028198    |
| "Mapk13"    | 2.5205464   | 2.4948096   | 2.544116    | 2.4423654   | 2.5126662   | 2.504765    | 2.5082889   | 2.5043187   |
| "Mapk14"    | 5.450268533 | 5.482190533 | 5.198608933 | 5.286301433 | 5.5430306   | 5.483244333 | 5.225851533 | 5.2634875   |
| "Mapk3"     | 6.125928    | 6.283393    | 6.901028    | 6.571168    | 6.519184    | 6.3303957   | 6.5078545   | 6.717361    |
| "Mapk6"     | 6.9112163   | 6.7841      | 6.250658    | 5.9692917   | 5.9880433   | 5.712442    | 5.951461    | 6.505976    |

|              |             |             |             |             |             |             |             |             |
|--------------|-------------|-------------|-------------|-------------|-------------|-------------|-------------|-------------|
| "Mapk7"      | 3.2074158   | 3.1753628   | 3.1626587   | 3.1557233   | 3.195547    | 3.1854148   | 3.1988573   | 3.2646139   |
| "Mapk8"      | 5.301354633 | 5.139639667 | 4.736763133 | 5.071868067 | 4.944216    | 5.119187533 | 4.9884465   | 5.022752233 |
| "Mapk8ip2"   | 2.691614967 | 2.667837333 | 2.617391067 | 2.640709133 | 2.694994733 | 2.678729    | 2.670973933 | 2.675730467 |
| "Mapk8ip3"   | 2.676931    | 2.8523293   | 2.637567    | 2.6646986   | 2.7118611   | 2.696041    | 2.6902285   | 2.7241755   |
| "Mapk9"      | 6.6881169   | 6.6583079   | 6.7632612   | 6.913266    | 6.932795667 | 7.049863567 | 7.181445167 | 7.039784233 |
| "Mapkap1"    | 7.813899    | 8.01590015  | 7.79938385  | 8.1798295   | 8.01512885  | 8.18090315  | 8.04790825  | 8.25796925  |
| "Mapkapk2"   | 8.569496    | 8.508489    | 7.760908    | 8.305995    | 6.555543    | 7.894292    | 8.510166    | 6.439574    |
| "Mapkapk5"   | 8.086116    | 7.987442    | 7.5046096   | 7.8830376   | 8.054548    | 8.312045    | 7.980507    | 7.880386    |
| "Mapkbp1"    | 3.1188865   | 3.2440305   | 3.2294539   | 2.79913925  | 3.07803165  | 2.8276253   | 2.9456929   | 2.85239325  |
| "Mapre1"     | 6.0812824   | 5.8005339   | 5.916695025 | 5.679682925 | 5.742178825 | 5.745674325 | 5.829147975 | 5.74845935  |
| "Mapre2"     | 6.1906774   | 5.7361973   | 6.253116    | 6.02857205  | 6.122771975 | 6.014135625 | 6.16862525  | 6.122150125 |
| "Mapre3"     | 2.6668935   | 3.0187624   | 2.6314628   | 2.6197815   | 3.0417893   | 2.679658    | 2.6430964   | 2.633858    |
| "Mapt"       | 3.0275857   | 3.010688    | 2.8486323   | 2.958955    | 3.0194278   | 3.0098286   | 3.0175688   | 3.0709445   |
| "MARCH2"     | 8.128045    | 8.867245    | 8.332544    | 8.689443    | 8.526987    | 8.631107    | 8.27579     | 8.536783    |
| "MARCH5"     | 10.824833   | 10.884327   | 10.469846   | 10.735333   | 10.735886   | 11.079083   | 10.4373025  | 10.751631   |
| "MARCH6"     | 11.186492   | 11.375726   | 11.233099   | 11.522537   | 11.509381   | 11.417333   | 11.322431   | 11.339143   |
| "MARCH7"     | 9.3637631   | 8.3476355   | 7.8957535   | 8.36058525  | 7.9185825   | 8.64852835  | 8.3408375   | 8.392136    |
| "Marcks"     | 9.0714635   | 7.49404116  | 9.8151186   | 9.00424316  | 8.2655654   | 8.37417974  | 9.4962546   | 8.55946592  |
| "Marcksl1"   | 5.124933675 | 3.993614575 | 5.08299785  | 4.8927586   | 4.314504925 | 4.3469036   | 5.34783455  | 4.74808685  |
| "Marco"      | 11.771909   | 9.023701    | 10.583191   | 9.906662    | 10.226009   | 8.87262     | 9.018665    | 8.843794    |
| "Mark1"      | 2.753698    | 2.72655965  | 2.719581025 | 2.741935325 | 2.78989325  | 2.8933597   | 2.782560425 | 2.770600825 |
| "Mark2"      | 4.1690006   | 4.1072075   | 4.2186966   | 4.0814794   | 4.2311635   | 4.18656765  | 4.06291235  | 4.1316084   |
| "Mark3"      | 8.641662    | 8.941916    | 8.403959    | 8.403423    | 8.921248    | 9.052274    | 8.412278    | 8.640988    |
| "Mark4"      | 2.752094933 | 2.7179692   | 2.6757002   | 2.698727067 | 2.74112     | 2.735373133 | 2.7418268   | 2.832334033 |
| "Marveld1"   | 4.109029733 | 5.097535567 | 4.607127533 | 4.9359067   | 5.046000733 | 4.960214667 | 4.642296133 | 5.191510067 |
| "Marveld2"   | 5.302551    | 4.3282733   | 5.621683    | 5.097833    | 5.238569    | 5.561727    | 6.0476537   | 6.299582    |
| "Mas1"       | 3.656093    | 3.6168568   | 3.385051    | 3.5638444   | 3.7200282   | 3.7252498   | 3.6174011   | 3.7369177   |
| "Masp1"      | 8.38053375  | 7.917377425 | 8.9237822   | 8.574982875 | 8.367582925 | 8.0932335   | 8.6548025   | 8.412121    |
| "Masp2"      | 6.828229    | 9.4874715   | 9.2443935   | 9.637302    | 9.48044     | 9.307328    | 9.4192655   | 9.6353925   |
| "Mast1"      | 2.5246592   | 2.486122    | 2.5170858   | 2.4833264   | 2.5054245   | 2.4965324   | 2.723761    | 2.495398    |
| "Mast2"      | 5.12152     | 6.173312    | 5.3452816   | 5.7639384   | 5.3049297   | 5.41379     | 5.39896     | 5.0691547   |
| "Mast3"      | 6.0724125   | 6.877853    | 6.493767    | 6.9070053   | 7.539575    | 7.1453867   | 6.8975873   | 7.1196346   |
| "Mastl"      | 3.005993    | 3.1812385   | 2.8744414   | 2.9649194   | 3.02593615  | 3.05022615  | 2.9758538   | 3.0449746   |
| "Mat1a"      | 14.540271   | 14.708728   | 14.070473   | 14.079846   | 14.431289   | 14.731651   | 13.7112875  | 13.539517   |
| "Mat2a"      | 8.025874029 | 8.280203629 | 8.121744371 | 8.074866443 | 8.237854329 | 8.0672992   | 7.995492271 | 8.309389271 |
| "Mat2b"      | 8.792176    | 8.7337265   | 8.614944    | 8.935313    | 8.794347    | 8.751296    | 8.788363    | 8.843816    |
| "Matk"       | 2.46524085  | 2.4310944   | 2.3915062   | 2.40190995  | 2.450585    | 2.45053125  | 2.44925485  | 2.49664585  |
| "Matn1"      | 2.718562    | 2.6853364   | 2.6390932   | 2.6383343   | 2.7127817   | 2.7101438   | 2.707672    | 2.705042    |
| "Matn2"      | 3.9624691   | 3.6206833   | 3.79825475  | 3.6197258   | 3.7069576   | 3.85589935  | 3.67603975  | 3.73445905  |
| "Matn3"      | 2.56014     | 2.5315921   | 2.4619257   | 2.4932518   | 2.5537868   | 2.5625343   | 2.5498283   | 2.5419357   |
| "Matr3"      | 10.70319167 | 10.50314033 | 10.00371133 | 10.089078   | 10.3984175  | 10.61318    | 10.411252   | 10.3609     |
| "Mau2"       | 5.434101267 | 5.3122519   | 5.188562933 | 5.1981029   | 5.463005633 | 5.4417852   | 5.166389033 | 5.2779125   |
| "Mavs"       | 9.00305925  | 9.1272835   | 9.2953085   | 9.245382    | 9.521427    | 10.08111    | 9.680506    | 9.6650865   |
| "Max"        | 5.0162416   | 4.878908    | 4.150277    | 4.6461496   | 4.909571    | 4.717976    | 4.58819     | 4.7123027   |
| "Maz"        | 3.7986882   | 3.7473495   | 3.710281    | 3.739278    | 3.957057    | 3.8017871   | 3.7197814   | 3.921083    |
| "Mb"         | 2.2946773   | 2.2835448   | 2.2498143   | 2.2448995   | 2.3028018   | 2.423554    | 2.2954018   | 2.2877893   |
| "Mbd1"       | 6.897381925 | 6.06988685  | 5.554054275 | 5.490502575 | 6.061846375 | 6.529627    | 5.08604215  | 5.943867275 |
| "Mbd2"       | 7.44375465  | 7.73996175  | 7.2498142   | 7.26907085  | 7.44729425  | 7.25356235  | 7.3179478   | 7.587721    |
| "Mbd3"       | 7.1054454   | 7.0592427   | 7.082873    | 6.64398     | 6.6379642   | 7.078999    | 6.4792366   | 6.592433    |
| "Mbd3l2"     | 2.92012     | 2.8911896   | 2.8055098   | 2.870855    | 2.9399626   | 2.9094074   | 2.908021    | 2.9141607   |
| "Mbd6"       | 3.5797694   | 3.6974962   | 3.3718634   | 3.6204166   | 3.607074    | 3.9209611   | 3.6211407   | 3.5482445   |
| "Mbip"       | 6.511684    | 4.7736607   | 5.05729     | 5.103121    | 5.1267653   | 5.118203    | 5.4505997   | 5.085971    |
| "Mbl1"       | 10.578802   | 10.705462   | 11.053188   | 10.93112    | 10.8133545  | 11.05868    | 10.779229   | 11.108199   |
| "Mbl2"       | 13.695617   | 13.035687   | 13.882192   | 13.981965   | 13.674876   | 13.44903    | 13.771755   | 13.433041   |
| "Mbnl1"      | 11.039466   | 11.1861515  | 11.269861   | 11.324262   | 11.4361515  | 11.296922   | 11.329258   | 11.503072   |
| "Mbnl3"      | 2.503196    | 2.4698563   | 2.4738588   | 2.4405622   | 2.490107    | 2.4883022   | 2.4807975   | 2.4816267   |
| "Mboat2"     | 3.39601     | 3.3671646   | 3.262916    | 3.2873182   | 3.8192735   | 3.4973085   | 3.3443227   | 3.395891    |
| "Mboat7"     | 6.8269854   | 6.430209    | 6.909734    | 7.288677    | 6.8212132   | 6.8708024   | 7.327729    | 7.1855707   |
| "Mbp"        | 2.4603223   | 2.433111    | 2.3776679   | 2.4928433   | 2.4644588   | 2.4439188   | 2.4484474   | 2.455324567 |
| "Mbtd1"      | 6.69504525  | 6.45639025  | 6.0464205   | 6.7986985   | 6.85201095  | 6.77973985  | 6.66842185  | 7.099516    |
| "Mbtps1"     | 5.3323425   | 5.14299395  | 5.2528826   | 5.26180065  | 5.21816415  | 5.31748445  | 5.34361885  | 5.4613305   |
| "Mc1r"       | 2.4221096   | 2.384924    | 2.354372    | 2.3454318   | 2.409923    | 2.4051442   | 2.3656561   | 2.3981931   |
| "Mcam"       | 3.8729002   | 3.0318112   | 2.9825337   | 3.0247343   | 3.0551467   | 3.045067    | 3.0583277   | 3.0408785   |
| "Mcart1"     | 9.777503333 | 8.976946133 | 7.822595333 | 8.3978306   | 8.584826667 | 9.134758667 | 7.872910033 | 8.5553325   |
| "Mcat"       | 6.5007606   | 6.841156    | 6.6894503   | 6.602781    | 7.019644    | 6.830803    | 7.0107336   | 6.6673675   |
| "Mccc1"      | 7.8790293   | 8.400062    | 8.959507    | 9.014702    | 8.429279    | 7.94653     | 8.979109    | 8.966472    |
| "Mccc2"      | 2.8885577   | 2.8729253   | 2.8388438   | 2.8544312   | 3.1497989   | 3.332512    | 2.9067757   | 2.8755224   |
| "Mcee"       | 8.515221    | 8.709632    | 8.9960375   | 9.258449    | 8.7923975   | 8.513057    | 8.975774    | 9.071859    |
| "Mcf2"       | 2.74078     | 2.7186997   | 2.6511693   | 2.6590917   | 2.753134    | 2.750912    | 2.712582    | 2.7530022   |
| "Mcfd2"      | 11.522294   | 11.773291   | 12.050431   | 12.022692   | 11.944275   | 11.917503   | 11.978054   | 11.395703   |
| "Mcg1038069" | 7.378584    | 6.877504    | 7.16325     | 6.908209    | 6.8247056   | 6.5638514   | 6.9385796   | 7.0625544   |
| "Mcl1"       | 10.54948758 | 9.375858667 | 10.53880058 | 10.258467   | 9.781247833 | 9.965806167 | 10.20096117 | 10.08090783 |
| "Mcm10"      | 5.79444155  | 6.7007995   | 5.04157065  | 6.4686142   | 5.37058085  | 6.3101479   | 5.35011725  | 6.6902781   |
| "Mcm2"       | 3.34460965  | 3.3213975   | 4.18168675  | 3.29662835  | 3.4510714   | 3.35484885  | 3.4925788   | 3.4469646   |
| "Mcm3"       | 3.351640575 | 2.9417073   | 3.90880245  | 3.194422825 | 3.334625775 | 3.0155547   | 3.604495975 | 3.051317275 |
| "Mcm3ap"     | 5.3540983   | 5.803447    | 5.7357416   | 5.836238    | 5.7338862   | 5.8449664   | 6.1249833   | 6.29281     |
| "Mcm4"       | 5.27060935  | 4.0119982   | 5.68369175  | 4.90570625  | 3.9502641   | 3.66731635  | 5.5294534   | 3.9459294   |
| "Mcm5"       | 2.2585387   | 2.2250779   | 2.1927757   | 2.1978962   | 2.2455184   | 2.2373936   | 2.3986776   | 2.2370665   |
| "Mcm6"       | 5.23089175  | 4.7102508   | 6.4313033   | 4.9507717   | 4.6639364   | 5.0353625   | 6.1745152   | 5.222465    |
| "Mcm7"       | 6.1683042   | 6.219058125 | 5.921710625 | 5.328891075 | 5.915022175 | 6.616130625 | 6.1233369   | 5.97477035  |
| "Mcmbp"      | 5.712928    | 5.724645    | 6.0751853   | 5.653976    | 5.657074    | 5.8561606   | 5.6170793   | 5.6908064   |

|            |             |             |             |             |             |             |             |             |
|------------|-------------|-------------|-------------|-------------|-------------|-------------|-------------|-------------|
| "Mcoln1"   | 5.5903284   | 5.9391767   | 5.6349792   | 6.0007413   | 5.81391535  | 6.3409845   | 5.7763641   | 6.1245828   |
| "Mcoln2"   | 2.6670856   | 2.6329877   | 3.3464627   | 3.0224905   | 2.6540546   | 2.6428742   | 2.6643214   | 2.6466482   |
| "Mcoln3"   | 2.6599104   | 2.640022    | 2.599485    | 2.6210065   | 2.6609664   | 2.651464    | 2.6566818   | 2.6543937   |
| "Mcrs1"    | 4.4850545   | 3.871154    | 3.7638772   | 3.7604547   | 3.7959702   | 3.7855866   | 4.125072    | 3.7951584   |
| "Mcts1"    | 9.355549    | 9.270577    | 9.39642     | 9.692058    | 9.610738    | 9.741387    | 9.72387     | 9.800705    |
| "Mcts2"    | 5.935211    | 6.8571243   | 6.699511    | 6.141754    | 6.672662    | 6.797188    | 6.941462    | 6.6380954   |
| "Mdfi"     | 2.5387938   | 2.509864    | 2.4270425   | 2.4637141   | 2.542734    | 2.5346992   | 2.5163047   | 2.5366728   |
| "Mdfig"    | 8.848346    | 9.167347    | 8.929357    | 9.012829    | 9.302048    | 9.673267    | 9.847382    | 9.197823    |
| "Mdh1"     | 10.27776693 | 10.46479275 | 10.46444355 | 10.6331066  | 10.50597375 | 10.40573903 | 10.6955062  | 10.686055   |
| "Mdh2"     | 12.055397   | 12.042361   | 12.0374555  | 11.672804   | 11.935758   | 11.8434075  | 12.0026155  | 11.96118325 |
| "Mdk"      | 3.2861362   | 2.9512515   | 2.9413552   | 2.8784065   | 2.9749997   | 2.978796    | 3.1655312   | 3.0056355   |
| "Mdm1"     | 2.4826674   | 2.4457102   | 2.398523    | 2.424285    | 2.4677517   | 2.4624896   | 2.4715157   | 2.4653547   |
| "Mdm2"     | 6.7131657   | 5.75383905  | 5.45148685  | 5.56647945  | 5.70404145  | 5.8838475   | 5.6692555   | 5.5212615   |
| "Mdm4"     | 5.0981853   | 5.10872065  | 5.2088481   | 5.24775935  | 5.1981805   | 5.22135675  | 5.2191797   | 5.41964545  |
| "Mdn1"     | 6.3439555   | 6.201639    | 5.940429    | 5.604906    | 6.381724    | 6.8516073   | 6.0969114   | 6.3129168   |
| "Mdp1"     | 6.2937025   | 6.7230525   | 6.6713016   | 6.683306    | 6.92057585  | 6.843335    | 6.7561895   | 6.7351341   |
| "Me1"      | 8.0197465   | 10.1927655  | 9.123536    | 9.3667705   | 11.3439605  | 10.224824   | 9.905588    | 9.750203    |
| "Me2"      | 3.7763918   | 2.9388095   | 3.33589885  | 3.14503935  | 3.0697421   | 2.9997501   | 3.1436157   | 2.9832012   |
| "Mea1"     | 7.62799165  | 8.0423183   | 8.225779    | 8.05373615  | 7.9197437   | 7.952655    | 8.044998    | 7.936346    |
| "Mecom"    | 2.7142162   | 2.6915183   | 2.6064923   | 2.6411362   | 2.7513514   | 2.724129    | 2.6993399   | 2.7596211   |
| "Mecp2"    | 4.27839075  | 4.30112505  | 4.0277839   | 3.8981918   | 4.0810649   | 4.2778157   | 4.2535479   | 4.17310315  |
| "Mecr"     | 6.45669375  | 6.948262    | 6.75786165  | 7.27786415  | 6.6876923   | 6.99279515  | 6.9258897   | 6.8862613   |
| "Med1"     | 5.16122022  | 5.00147586  | 5.01067926  | 5.1129744   | 5.17237624  | 5.1428845   | 4.97926096  | 5.04539794  |
| "Med10"    | 9.047787    | 8.389639    | 8.351793    | 8.19034     | 8.025373    | 8.19191     | 8.312601    | 8.100911    |
| "Med11"    | 7.132384    | 7.2414904   | 7.538942    | 7.12634     | 7.142473    | 7.029268    | 7.0445614   | 7.045753    |
| "Med12"    | 5.598788    | 5.689635    | 5.6561604   | 5.2957883   | 5.4395547   | 5.9545097   | 5.5876184   | 5.568485    |
| "Med12i"   | 3.7751725   | 4.042632    | 3.8925982   | 3.5672238   | 3.6952226   | 3.8177586   | 4.157615    | 3.6921988   |
| "Med14"    | 3.436478    | 4.6997294   | 3.6253943   | 3.687553    | 4.760683    | 3.6820645   | 3.7501256   | 3.5685017   |
| "Med15"    | 7.4435673   | 6.999242    | 7.105547    | 6.9819603   | 7.0494947   | 7.1351166   | 6.9159274   | 6.5669765   |
| "Med16"    | 6.477675    | 7.289782    | 6.9412117   | 7.051397    | 7.050082    | 6.749194    | 6.704076    | 6.902646    |
| "Med17"    | 4.9230552   | 4.67800825  | 4.71716435  | 4.80903735  | 4.8731082   | 4.87546335  | 4.84401715  | 4.82749515  |
| "Med19"    | 5.4639465   | 5.580315    | 5.897518    | 5.80498085  | 5.3954903   | 5.50863365  | 5.6884555   | 5.5524559   |
| "Med20"    | 6.9142788   | 6.8620593   | 6.62798315  | 6.841463    | 7.376523    | 7.0870695   | 6.7862195   | 7.13938525  |
| "Med21"    | 7.284578    | 6.6682      | 7.451042    | 6.990661    | 6.590291    | 7.0978284   | 6.883051    | 6.681252    |
| "Med22"    | 4.589771    | 5.2405043   | 5.252693    | 5.494121    | 5.719943    | 5.574382    | 5.729048    | 5.459162    |
| "Med23"    | 5.02499     | 5.274822    | 5.3810425   | 5.2871876   | 5.3333178   | 5.3378906   | 5.6457605   | 5.318536    |
| "Med24"    | 3.6620245   | 3.627637    | 3.6188288   | 3.6186998   | 3.644722    | 3.6368527   | 3.6522448   | 3.6320958   |
| "Med25"    | 3.5575209   | 3.7663102   | 3.4990568   | 3.5313349   | 3.5569463   | 3.551989    | 3.5617476   | 3.5434604   |
| "Med26"    | 2.779207    | 2.6456864   | 2.6134555   | 2.5947433   | 2.6619794   | 2.659347    | 2.6716945   | 2.65523     |
| "Med27"    | 3.255981    | 3.046857    | 2.9391453   | 2.7555172   | 2.629985    | 2.8122678   | 2.5543778   | 2.77711     |
| "Med28"    | 6.19826335  | 6.03764415  | 6.375061    | 6.4640686   | 5.8719875   | 6.0769423   | 6.0807097   | 6.1301492   |
| "Med29"    | 6.539243    | 6.3668528   | 6.254383    | 6.239377    | 5.962679    | 6.256646    | 5.955517    | 6.027185    |
| "Med30"    | 7.536134    | 7.8015532   | 7.619942    | 7.783922    | 7.358665    | 7.426004    | 8.148116    | 7.749497    |
| "Med31"    | 6.061078    | 6.1865907   | 6.288282    | 6.1799455   | 5.9861817   | 6.290036    | 5.8878107   | 5.874356    |
| "Med4"     | 7.372119    | 6.8361897   | 6.668671    | 6.7855825   | 7.012901    | 6.9970517   | 6.7662363   | 6.72224     |
| "Med6"     | 4.6796474   | 4.591036    | 4.4042974   | 4.394537    | 4.5776587   | 4.6977425   | 4.3774986   | 4.680086    |
| "Med7"     | 8.41661     | 8.362207    | 8.677819    | 8.473599    | 8.575439    | 8.865933    | 8.816298    | 8.524313    |
| "Med8"     | 9.550887    | 9.87034     | 9.92843     | 9.638494    | 9.537017    | 9.836709    | 9.343502    | 9.526752    |
| "Med9"     | 5.2012075   | 5.48005515  | 5.445781    | 5.131752    | 5.2038722   | 5.3008457   | 5.24227415  | 5.08719435  |
| "Mef1a"    | 7.52502388  | 7.10956696  | 7.1440282   | 7.1391069   | 7.1498436   | 7.2792698   | 7.19105144  | 7.12923914  |
| "Mef2c"    | 3.63494034  | 3.38322146  | 3.73321702  | 3.94361152  | 3.7728981   | 3.7982594   | 3.9164765   | 3.7566118   |
| "Mef2d"    | 4.7323902   | 4.437901    | 4.096612    | 4.1607379   | 4.31973505  | 4.43718265  | 4.12178315  | 4.22317145  |
| "Mefv"     | 4.572095    | 3.6204748   | 5.5027194   | 4.2091665   | 4.081287    | 3.845447    | 3.6506667   | 3.6326857   |
| "Meg3"     | 4.64746496  | 5.0330745   | 4.6113328   | 7.20883034  | 4.9527727   | 4.74687318  | 4.5286224   | 5.62241322  |
| "Meig1"    | 2.6725378   | 3.349661    | 2.50603     | 2.6374292   | 2.6746457   | 2.6730652   | 2.5682223   | 2.7495117   |
| "Meis1"    | 4.184948    | 4.428583    | 5.3046885   | 6.1177354   | 4.832022    | 4.8014946   | 4.8356996   | 5.0169077   |
| "Meis2"    | 4.01165     | 3.3837333   | 4.438702    | 4.5032554   | 4.622538    | 5.0495415   | 5.2521663   | 4.809307    |
| "Mela"     | 3.716975633 | 3.427362167 | 3.2484528   | 3.319024833 | 3.522685933 | 3.597684867 | 3.321210467 | 3.494565933 |
| "Melk"     | 2.52991     | 2.5174308   | 2.4294605   | 2.4740112   | 2.515998    | 2.5259748   | 2.4995086   | 2.5134563   |
| "Memo1"    | 6.18773475  | 6.3324797   | 6.5087475   | 6.6167915   | 6.11673865  | 6.4471602   | 6.58784315  | 6.577515    |
| "Men1"     | 4.06001715  | 3.7969298   | 4.0117405   | 4.05737605  | 4.14338425  | 4.18000885  | 3.9677283   | 3.92225435  |
| "Meox2"    | 2.83573385  | 2.83022405  | 2.6864056   | 2.7707419   | 2.855213    | 2.87122975  | 2.8223151   | 2.8647292   |
| "Mepce"    | 3.413250533 | 3.654496367 | 3.400458333 | 3.8220389   | 3.7837891   | 3.7920218   | 3.627442367 | 3.750780033 |
| "Mepe"     | 2.878798    | 2.8461301   | 2.7266667   | 2.780602    | 2.8744495   | 2.8919096   | 2.7924805   | 2.8818007   |
| "Mertk"    | 9.253116    | 8.637098    | 9.271104    | 9.05744     | 9.137292    | 9.122108    | 8.989468    | 8.618656    |
| "Mesdc1"   | 3.2422187   | 3.370821    | 3.0908735   | 3.1302047   | 3.3216324   | 3.2441607   | 3.2338736   | 3.3730323   |
| "Mesdc2"   | 8.938747    | 8.73496     | 9.389464    | 8.899834    | 9.06878     | 8.856863    | 8.616122    | 8.689939    |
| "Mesp1"    | 2.4378228   | 2.4089463   | 2.3454673   | 2.3687565   | 2.4358988   | 2.4293756   | 2.4261804   | 2.455903    |
| "Mest"     | 3.686438    | 3.056872    | 3.9131002   | 3.8172085   | 3.8252382   | 3.6596818   | 4.1946673   | 3.6575623   |
| "Metap1"   | 7.672705    | 8.105099167 | 7.693427533 | 7.412022167 | 7.767257067 | 7.892221767 | 7.272524267 | 7.6580182   |
| "Metap1d"  | 5.4539863   | 5.4805029   | 5.8103043   | 5.37616865  | 5.7345882   | 5.5448633   | 5.4705943   | 5.5492349   |
| "Metap2"   | 7.4685091   | 7.263986333 | 7.0912104   | 7.064879333 | 7.0466128   | 7.418827867 | 7.244186467 | 7.145400733 |
| "Metrn"    | 6.4063797   | 6.9300346   | 6.3706617   | 7.676597    | 6.256014    | 6.504648    | 6.78194     | 6.6510944   |
| "Metrn1"   | 7.438029    | 4.7009945   | 5.703326    | 5.3700514   | 4.7897944   | 5.735917    | 4.872955    | 4.999714    |
| "Mett1"    | 4.5220127   | 5.3155556   | 4.75329     | 4.351004    | 5.007992    | 4.4982185   | 4.0305367   | 4.35467     |
| "Mett11a"  | 5.7332525   | 6.0097363   | 5.3556388   | 5.6886683   | 6.12184665  | 5.60435825  | 5.51028965  | 5.0219507   |
| "Mett113"  | 3.0816822   | 3.1641777   | 2.895344    | 3.245556    | 3.2836552   | 3.20466     | 3.1953633   | 3.2467628   |
| "Mett117"  | 4.063304833 | 3.9548125   | 4.468993033 | 4.579019133 | 4.505595733 | 4.428009367 | 4.5270865   | 4.231360033 |
| "Mett121a" | 4.7663761   | 5.048603367 | 5.297326533 | 5.207701    | 4.8082156   | 4.8992141   | 4.971040267 | 4.713856733 |
| "Mett122"  | 4.767227    | 5.9616137   | 5.470607    | 5.9926357   | 6.2219567   | 5.689515    | 6.137178    | 6.0823874   |
| "Mett13"   | 7.3939347   | 7.496207    | 7.4578805   | 7.439508    | 7.238144    | 8.279179    | 7.481039    | 7.3284187   |

|            |             |             |             |             |             |             |             |             |
|------------|-------------|-------------|-------------|-------------|-------------|-------------|-------------|-------------|
| "Mettl5"   | 9.035642    | 9.254587    | 9.34783     | 9.575816    | 9.617754    | 9.241898    | 9.571552    | 9.862589    |
| "Mettl6"   | 5.5162415   | 5.861313    | 6.29722215  | 6.0155997   | 6.12913315  | 5.84267285  | 5.68870735  | 6.130197    |
| "Mettl7a1" | 10.0470648  | 9.95960305  | 10.02243925 | 10.53315295 | 9.75637875  | 9.5225097   | 10.00715583 | 9.991205625 |
| "Mettl7a2" | 9.876215    | 9.838169    | 10.038047   | 10.469062   | 9.730936    | 9.584203    | 9.626645    | 9.977572    |
| "Mettl7b"  | 10.366606   | 10.984294   | 11.387855   | 11.541408   | 11.583883   | 11.36261    | 11.567326   | 11.614705   |
| "Mettl8"   | 5.565427    | 5.2586737   | 6.063257    | 6.4951653   | 5.95986     | 6.2061014   | 6.5634394   | 6.1164756   |
| "Mettl9"   | 9.102704    | 9.606875    | 9.430038    | 9.4615855   | 9.474068    | 9.089664    | 9.7849855   | 9.385572    |
| "Mfap1a"   | 8.4368858   | 7.73813135  | 7.75593825  | 7.8011172   | 7.9005655   | 7.96814135  | 7.5522145   | 7.7977925   |
| "Mfap3"    | 4.68943655  | 4.6267559   | 5.03507335  | 4.7953794   | 4.8797997   | 4.67627425  | 4.94658975  | 4.74833655  |
| "Mfge8"    | 6.6333146   | 6.1734204   | 7.2049522   | 6.3764033   | 6.6881685   | 6.79565     | 6.6668787   | 6.393825    |
| "Mfhas1"   | 10.205057   | 9.495608    | 10.604927   | 9.695654    | 9.280942    | 9.6887665   | 9.623858    | 9.892193    |
| "Mfn1"     | 8.44201     | 8.7212535   | 8.273809    | 8.5789685   | 8.8238275   | 9.07337175  | 8.597124    | 8.847115    |
| "Mfn2"     | 8.981497    | 9.735511    | 9.426136    | 9.516774    | 9.964576    | 9.328556    | 9.723633    | 9.488418    |
| "Mfng"     | 3.1752384   | 3.1306074   | 3.117933    | 3.1257436   | 3.1600184   | 3.446594    | 3.167471    | 2.9783337   |
| "Mfsd1"    | 8.1164428   | 7.905393633 | 8.3350071   | 8.480615667 | 8.362155233 | 8.260189333 | 8.415104267 | 8.223429333 |
| "Mfsd10"   | 3.2514927   | 3.4997306   | 3.2020116   | 3.2085664   | 3.2563243   | 3.24595     | 3.2398815   | 3.2396283   |
| "Mfsd3"    | 6.6661983   | 6.633183    | 6.4938445   | 6.625881    | 6.758072    | 6.6420665   | 6.659129    | 6.637662    |
| "Mfsd4"    | 2.6234623   | 2.634623    | 2.5603596   | 2.57847015  | 2.6449804   | 2.65673925  | 2.6275868   | 2.63637505  |
| "Mfsd5"    | 6.737665    | 6.579119    | 6.6796665   | 6.739061    | 6.7194824   | 6.8903804   | 6.727428    | 6.706973    |
| "Mfsd6"    | 5.894051167 | 5.682131667 | 5.904069033 | 5.765561133 | 5.911769467 | 5.964714267 | 6.3411294   | 6.1016814   |
| "Mfsd7c"   | 3.7383978   | 4.063052    | 3.6401112   | 2.943849    | 3.0765674   | 4.5220585   | 3.5371125   | 3.1393888   |
| "Mfsd8"    | 5.796709    | 5.761569    | 5.900283    | 6.5727077   | 6.0128098   | 5.5281544   | 6.8520594   | 6.836916    |
| "Mga"      | 4.3524417   | 4.3067164   | 4.66263045  | 4.7302296   | 4.5020058   | 5.21452285  | 4.52546025  | 4.5264527   |
| "Mgarp"    | 2.3853557   | 2.3665333   | 2.2984953   | 2.328777    | 2.4100485   | 2.3662882   | 2.3694425   | 2.660415    |
| "Mgat1"    | 7.3027887   | 7.681041    | 7.9614635   | 7.991438    | 7.7128053   | 7.6709723   | 7.908277    | 7.898518    |
| "Mgat2"    | 8.567813    | 8.8355632   | 8.4054558   | 8.4288755   | 9.35613575  | 8.8405775   | 8.4812505   | 8.561732    |
| "Mgat4b"   | 7.3763585   | 7.1539307   | 7.3043885   | 7.363882    | 7.5081077   | 7.354382    | 7.4894023   | 7.3947654   |
| "Mgat5"    | 2.4398055   | 2.4439073   | 2.3449287   | 2.3798332   | 2.4857755   | 2.4441252   | 2.4050586   | 2.652699    |
| "Mgea5"    | 6.9821469   | 5.95842394  | 6.14667954  | 6.29944804  | 6.24363968  | 6.0165051   | 6.39728666  | 6.52152516  |
| "Mgll"     | 5.825683467 | 8.53602     | 5.364613167 | 7.705879833 | 9.785467667 | 8.7984032   | 8.859096    | 8.841476833 |
| "Mgmt"     | 5.519879    | 5.6624045   | 5.7212296   | 6.646034    | 5.941009    | 5.500566    | 5.8419514   | 6.3433356   |
| "Mgp"      | 6.3906584   | 6.837947    | 6.4322934   | 6.776212    | 6.7576003   | 6.835189    | 6.940445    | 6.6335454   |
| "Mgst1"    | 8.6383421   | 9.3370999   | 8.56977205  | 8.7173472   | 8.72695075  | 8.7427865   | 8.74044215  | 8.8130225   |
| "Mgst2"    | 2.9022424   | 2.8753629   | 2.836986    | 2.8617358   | 2.8963833   | 2.8967197   | 2.854869    | 2.921062    |
| "Mgst3"    | 5.0277077   | 4.882958    | 6.3953126   | 5.50912265  | 5.242645    | 4.41265385  | 5.82575015  | 5.344375    |
| "Mia1"     | 7.290165    | 6.885967    | 7.2945623   | 6.8041034   | 6.5966187   | 6.294098    | 6.4653664   | 6.5494256   |
| "Mia2"     | 2.939367    | 2.9449315   | 2.8099577   | 3.0577815   | 2.9312217   | 2.9283478   | 2.9154863   | 2.9191484   |
| "Mia3"     | 9.2965735   | 9.2794485   | 9.0559254   | 9.347717    | 9.296976    | 9.6409675   | 9.2685827   | 9.449442    |
| "Mib1"     | 3.9546747   | 4.3136196   | 3.5550613   | 3.6213229   | 3.7081943   | 3.6922064   | 3.7081416   | 3.7623188   |
| "Mib2"     | 5.0784745   | 4.225868    | 5.112393    | 5.2887044   | 4.940935    | 5.4102826   | 5.1102977   | 5.176061    |
| "Mical1"   | 3.14780555  | 2.88785745  | 2.9866078   | 3.25893255  | 3.16402165  | 3.1605741   | 3.10795335  | 3.1618357   |
| "Mical2"   | 2.5509102   | 2.5104282   | 2.7658129   | 2.4946733   | 2.5296052   | 2.520838    | 2.5353785   | 2.5217361   |
| "Micu1"    | 5.656297    | 5.9559846   | 5.9526415   | 5.9458294   | 6.2740793   | 5.8921924   | 6.241431    | 5.9953914   |
| "Mid1p1"   | 6.466504    | 7.645832    | 9.460055    | 9.156435    | 8.463568    | 7.133028    | 8.884485    | 9.490696    |
| "Mid2"     | 2.4459913   | 2.416564    | 2.3717637   | 2.3736863   | 2.4386096   | 2.4637885   | 2.433232    | 2.4334033   |
| "Midn"     | 7.7207656   | 7.544666    | 7.314376    | 7.567945    | 6.9351177   | 7.193019    | 8.003171    | 7.8670955   |
| "Mier2"    | 4.08553167  | 4.115050467 | 3.9280307   | 4.051618633 | 3.936772467 | 4.250850033 | 4.010124733 | 4.0415548   |
| "Mif"      | 11.630149   | 11.682846   | 11.407757   | 11.715983   | 11.810286   | 11.564408   | 11.773326   | 11.802193   |
| "Mif4gd"   | 7.717675    | 7.891633    | 7.392694    | 7.1119447   | 7.9287977   | 7.705271    | 7.4251127   | 7.556639    |
| "Miip"     | 4.66391585  | 4.5592845   | 4.142469    | 4.65816915  | 4.7470998   | 4.7408398   | 4.4818077   | 4.72023665  |
| "Mina"     | 4.519398325 | 4.766569025 | 4.88466865  | 4.7116512   | 4.86274725  | 4.7969538   | 4.7518201   | 4.7120108   |
| "Mink1"    | 7.1938033   | 7.1711273   | 7.146223    | 7.192175    | 7.252419    | 7.2115364   | 7.2791595   | 7.1897707   |
| "Minos1"   | 9.7230305   | 10.3383925  | 10.0950285  | 10.330247   | 10.1903545  | 10.110302   | 10.27115375 | 10.224163   |
| "Minpp1"   | 8.2417665   | 8.793479    | 8.5514342   | 8.55475975  | 8.7855985   | 8.78215975  | 9.0499785   | 8.5212797   |
| "Mios"     | 5.843384    | 6.5163498   | 6.22142525  | 6.1325841   | 6.12147485  | 6.28874565  | 6.09723075  | 5.9075718   |
| "Miox"     | 2.384695    | 2.3526697   | 2.3356905   | 2.3326793   | 2.3661265   | 2.3591347   | 2.3715568   | 2.353075    |
| "Mip"      | 2.4022582   | 2.368193    | 2.2948327   | 2.3277557   | 2.4322944   | 2.3822563   | 2.3639147   | 2.390142    |
| "Mipo1"    | 2.5834556   | 2.5638657   | 2.4549522   | 2.4941278   | 2.6096115   | 2.610302    | 2.5753474   | 2.6110559   |
| "Mir682"   | 6.5658255   | 6.432261    | 6.283842    | 5.95281     | 6.3502703   | 6.395704    | 6.040696    | 6.3354273   |
| "Mis12"    | 6.177941    | 6.5030093   | 6.442386    | 7.0936694   | 7.4194174   | 6.5706334   | 6.7218657   | 7.392574    |
| "Mitd1"    | 4.7966609   | 4.8275328   | 5.3393953   | 5.4121175   | 5.117522    | 4.7416098   | 5.47478825  | 5.3276217   |
| "Mitf"     | 6.4230466   | 6.205687    | 6.256435    | 6.1075354   | 6.226797    | 6.106832    | 6.128865    | 5.462484    |
| "Mki67"    | 4.347922    | 3.6932752   | 5.2234106   | 4.4643936   | 3.8160381   | 3.7885668   | 4.2711506   | 2.8481176   |
| "Mki67ip"  | 9.171822    | 8.913536    | 8.224552    | 8.264876    | 8.809555    | 8.550286    | 8.1090145   | 8.331271    |
| "Mkks"     | 6.730277    | 6.5966335   | 6.73792455  | 6.76196515  | 6.6071267   | 7.22873075  | 6.65558865  | 6.9322635   |
| "Mkl1"     | 5.9031277   | 4.290398    | 4.4140835   | 4.262625    | 4.3125386   | 4.221113    | 4.3021417   | 3.9155936   |
| "Mkln1"    | 8.184485    | 8.735477    | 8.831889    | 8.575726    | 9.189298    | 9.001397    | 9.299104    | 9.36817     |
| "Mknk1"    | 5.9751554   | 5.5392466   | 5.591201    | 5.769972    | 5.9209037   | 6.291483    | 5.567031    | 5.781227    |
| "Mknk2"    | 7.9145652   | 7.52656405  | 7.13916655  | 7.5818625   | 7.08177085  | 7.9183004   | 7.2700447   | 7.0857529   |
| "Mkrrn1"   | 6.7669688   | 6.48147166  | 6.27100808  | 6.71004344  | 6.50503874  | 6.20507972  | 6.3100207   | 5.57157486  |
| "Mkrrn2"   | 6.1256454   | 7.10169175  | 6.435892    | 6.7286582   | 6.483164    | 6.60669065  | 6.58413365  | 6.58413365  |
| "Mkrrn3"   | 2.545216    | 2.5148797   | 2.4454865   | 2.4869452   | 2.5371017   | 2.5356355   | 2.5346017   | 2.539695    |
| "Mlc1"     | 2.477524    | 2.4520407   | 2.3755      | 2.4066331   | 2.477015    | 2.5106204   | 2.4691772   | 2.4671116   |
| "Mlec"     | 4.0243883   | 5.59362     | 5.783668    | 5.5956345   | 6.8354197   | 5.6145406   | 5.8017473   | 5.67343     |
| "Mlf1"     | 2.8314583   | 2.813774    | 2.7474995   | 2.7194185   | 2.8238654   | 2.867681    | 2.77695     | 2.825299    |
| "Mlf2"     | 5.5299516   | 6.6217446   | 6.170323    | 6.5343127   | 6.343366    | 6.6124334   | 6.4739327   | 6.225613    |
| "Mlh1"     | 5.5852866   | 5.9381456   | 6.202229    | 5.887459    | 6.0515857   | 5.8789015   | 5.933456    | 5.8751764   |
| "Mlh3"     | 3.9258149   | 3.4609134   | 3.8209894   | 3.8686771   | 3.8868315   | 4.280224    | 4.6553993   | 3.8953643   |
| "Mll1"     | 5.916009    | 5.8242097   | 5.9313707   | 6.144176    | 5.78271     | 6.0663757   | 5.968577    | 5.9124036   |
| "Mll2"     | 3.034519    | 3.0052826   | 2.942728    | 3.01217     | 3.053124    | 3.0192273   | 2.9637623   | 3.0181425   |
| "Mll3"     | 6.7378407   | 6.549696    | 6.449541    | 6.335558    | 6.4325857   | 6.594715    | 6.2121077   | 6.6531386   |

|             |             |             |             |             |             |             |             |             |
|-------------|-------------|-------------|-------------|-------------|-------------|-------------|-------------|-------------|
| "Mll5"      | 7.60352885  | 8.616399    | 8.647997    | 8.606436    | 8.828044    | 8.785401    | 8.598377    | 8.556194    |
| "Mllt1"     | 3.4732852   | 3.5272396   | 3.1280758   | 3.0323613   | 3.212651    | 3.297439    | 2.8187099   | 3.3285124   |
| "Mllt10"    | 7.9307084   | 8.3146715   | 8.168334    | 8.127085    | 8.692163    | 8.827538    | 8.517442    | 8.57719     |
| "Mllt11"    | 3.1708784   | 3.1892438   | 3.6399596   | 3.1949508   | 3.240171    | 3.3008685   | 3.332643    | 3.2242892   |
| "Mllt3"     | 2.1983147   | 2.151299    | 2.1939287   | 2.14179     | 2.4133282   | 2.173761    | 2.1854157   | 2.1691754   |
| "Mllt6"     | 3.0833752   | 3.2952712   | 2.8999705   | 3.0515995   | 3.0769677   | 3.1627283   | 3.0320258   | 3.0758696   |
| "Mlst8"     | 2.3563943   | 2.3423047   | 2.2881193   | 2.3266335   | 2.3590877   | 2.9374423   | 2.3462448   | 2.3452291   |
| "Mlx"       | 6.1195907   | 6.90622765  | 6.74365805  | 6.46804405  | 6.6352562   | 6.39268875  | 6.2492093   | 6.5627428   |
| "Mlxip"     | 6.5348115   | 5.622321    | 5.6565733   | 4.6835318   | 5.457995    | 5.5754876   | 5.2043767   | 5.1255045   |
| "Mlxipl"    | 8.340483    | 8.610577    | 9.3921175   | 10.41228    | 10.137957   | 9.991808    | 10.2904825  | 10.925699   |
| "Mlycd"     | 8.275002    | 8.285456    | 7.859589    | 8.229727    | 8.589208    | 8.857431    | 8.371683    | 8.364107    |
| "Mmaa"      | 6.01383     | 6.2977467   | 6.8672247   | 6.8340087   | 6.8032594   | 6.7218504   | 6.8902407   | 6.75494     |
| "Mmab"      | 2.6934104   | 2.5127591   | 3.29861585  | 3.2767348   | 2.5439461   | 2.62663575  | 2.82411645  | 2.90310155  |
| "Mmachc"    | 6.8576794   | 7.4001436   | 7.353179    | 7.2171316   | 7.378133    | 7.3467894   | 7.7741866   | 7.109833    |
| "Mmadhc"    | 10.130062   | 10.232069   | 9.803784    | 9.723417    | 10.600825   | 10.398505   | 10.246868   | 10.30133    |
| "Mmd"       | 11.065382   | 10.872231   | 11.0547     | 11.3683085  | 11.8143175  | 11.36205    | 11.749056   | 11.5312905  |
| "Mmd2"      | 9.864492    | 10.1903305  | 11.117759   | 11.7068315  | 10.795781   | 11.431951   | 11.85159325 | 11.1511905  |
| "Mme"       | 3.036522    | 3.05786     | 3.2257166   | 3.717689    | 3.8908885   | 3.0387106   | 4.336479    | 3.6175535   |
| "Mmgt2"     | 2.4840972   | 2.4479208   | 2.4429517   | 2.4303029   | 2.466176    | 2.6674974   | 2.4747148   | 2.4526787   |
| "Mmp11"     | 2.4281607   | 2.4005933   | 2.3311074   | 2.3632958   | 2.4220784   | 2.4170828   | 2.4180148   | 2.4082727   |
| "Mmp12"     | 2.981756    | 2.5377433   | 2.846027    | 2.5296144   | 2.5461617   | 2.552025    | 2.5403311   | 2.5519595   |
| "Mmp13"     | 2.6594625   | 2.6326776   | 3.3121629   | 2.6040616   | 2.6616788   | 2.6594167   | 2.6429524   | 2.6556048   |
| "Mmp14"     | 5.8089273   | 5.9297967   | 6.0350715   | 5.5098901   | 5.76886685  | 5.78960215  | 5.8928371   | 5.53449565  |
| "Mmp15"     | 2.8372679   | 2.851068    | 3.119891    | 3.6600022   | 3.3891208   | 3.2893507   | 3.3124068   | 4.0020747   |
| "Mmp16"     | 2.3668544   | 2.3361318   | 2.2648077   | 2.3179333   | 2.3563447   | 2.3623118   | 2.3509607   | 2.3674664   |
| "Mmp17"     | 3.1203012   | 3.0903559   | 3.040598    | 3.0625203   | 3.1105332   | 3.202168    | 3.1096957   | 3.0959907   |
| "Mmp19"     | 3.91460585  | 3.8842375   | 4.42773775  | 4.6148626   | 4.2974757   | 3.7649398   | 4.51151035  | 3.8456987   |
| "Mmp2"      | 3.2584634   | 3.2147815   | 3.4852426   | 3.2667756   | 3.2832398   | 3.2610734   | 3.2712152   | 3.2581463   |
| "Mmp23"     | 3.3311281   | 3.3008227   | 3.271264    | 3.3821096   | 3.292283    | 3.3047147   | 3.3209295   | 3.3102055   |
| "Mmp24"     | 2.6890655   | 2.6905732   | 2.6069345   | 2.6668997   | 2.7110415   | 2.691997    | 2.6626291   | 2.8682618   |
| "Mmp8"      | 4.648978    | 2.1803682   | 3.444351    | 2.165043    | 1.9650106   | 2.2473514   | 2.072515    | 2.1555152   |
| "Mmp9"      | 3.1117625   | 2.8127804   | 3.267581    | 2.7850378   | 2.8351657   | 2.8274431   | 2.8335247   | 2.8198962   |
| "Mms19"     | 4.34961645  | 4.31747165  | 4.2749758   | 4.4450046   | 4.27497195  | 4.5133654   | 4.1311282   | 4.457325    |
| "Mnat1"     | 5.7974696   | 6.019943    | 6.5495505   | 6.0025644   | 5.750924    | 5.744669    | 6.1352363   | 5.953593    |
| "Mnd1"      | 3.1726923   | 3.1684027   | 3.2144747   | 3.150613    | 3.0842588   | 3.1485136   | 3.5694323   | 4.583812    |
| "Mndal"     | 10.020211   | 8.244941    | 10.536366   | 10.2168715  | 9.1508425   | 9.035061    | 10.2808735  | 9.38258675  |
| "Mns1"      | 2.4766092   | 2.551824    | 2.673963    | 2.3761706   | 2.5127664   | 2.6245437   | 2.4774787   | 2.5086854   |
| "Mnt"       | 5.7704468   | 5.03627375  | 5.20806575  | 5.1907305   | 4.78753545  | 5.00413175  | 4.7217698   | 5.1047911   |
| "Mob1a"     | 6.377414233 | 6.0822441   | 6.749414833 | 6.5049078   | 6.018917467 | 6.370703233 | 6.526946167 | 6.2990585   |
| "Mob1b"     | 8.967335    | 9.045636    | 8.056608    | 8.558853    | 8.799066    | 8.61838     | 8.874194    | 9.257328    |
| "Mob2"      | 6.142064    | 5.7027903   | 4.7990923   | 5.3109946   | 5.3544726   | 5.3876076   | 5.0727887   | 5.3439174   |
| "Mob3b"     | 5.409729    | 5.6732335   | 5.2888265   | 5.3670945   | 4.9550796   | 5.3857074   | 5.7041397   | 5.399405    |
| "Mob4"      | 9.025945    | 8.45929195  | 8.11806775  | 8.1333727   | 8.4279318   | 8.67391925  | 8.36911575  | 8.44057375  |
| "Mobp"      | 2.8420572   | 2.8202477   | 2.68214404  | 2.7668333   | 2.856576    | 2.8673015   | 2.8271885   | 2.875177    |
| "Mocos"     | 8.246246    | 8.775077    | 9.96762     | 9.09199     | 8.531307    | 8.31816     | 8.835155    | 8.649491    |
| "Mocs1"     | 4.207065    | 4.9768734   | 4.1391053   | 3.987598    | 4.1931086   | 4.5784135   | 4.1974945   | 4.177465    |
| "Mocs2"     | 8.26893115  | 8.4889122   | 7.9725407   | 8.4788573   | 8.5223955   | 8.427672    | 8.57295985  | 8.441864    |
| "Mog"       | 3.0708916   | 3.078929    | 2.9196417   | 2.976608    | 3.1336071   | 3.165251    | 3.027358    | 3.1807482   |
| "Mogat2"    | 2.3580816   | 2.5849955   | 2.7558074   | 2.9727452   | 2.3399024   | 2.3372195   | 2.3509777   | 2.3374946   |
| "Mogs"      | 7.7657843   | 7.453003    | 8.100783    | 7.7429667   | 7.8208613   | 8.452838    | 7.8547664   | 7.81922     |
| "Morc1"     | 2.5943332   | 2.5663164   | 2.4835153   | 2.513977    | 2.592875    | 2.6122775   | 2.5623543   | 2.5874107   |
| "Morc3"     | 6.515112267 | 6.107267233 | 6.004197033 | 6.1963788   | 6.181860067 | 6.335069233 | 6.493419633 | 6.2240563   |
| "Morc4"     | 3.3456383   | 3.1450467   | 3.0210094   | 2.8602123   | 3.7471316   | 3.160187    | 3.1893873   | 2.9545794   |
| "Morf4l2"   | 11.50709783 | 11.26388833 | 11.780016   | 10.90957733 | 11.39747333 | 11.08172133 | 11.3107705  | 10.77905    |
| "Morn3"     | 2.8827636   | 2.870257    | 2.7864156   | 2.8174639   | 2.8712604   | 2.8648286   | 2.8229837   | 2.8585696   |
| "Moscl"     | 13.297429   | 13.175005   | 12.680309   | 12.867522   | 13.004102   | 13.461382   | 12.960462   | 12.932734   |
| "Mosc2"     | 12.735854   | 12.941651   | 12.95035    | 13.28595    | 13.227041   | 12.70767    | 12.992044   | 13.216143   |
| "Mospd1"    | 7.873811    | 7.671962    | 7.786694    | 7.9065666   | 7.9415436   | 7.872671    | 7.59759     | 7.4840436   |
| "Mospd2"    | 8.1053695   | 7.92762985  | 8.4276815   | 8.26651535  | 7.579672    | 7.60526135  | 8.4537248   | 8.3252758   |
| "Mov10"     | 3.0246778   | 4.2114525   | 5.3327146   | 4.981869    | 3.967388    | 3.246144    | 4.1102715   | 4.971455    |
| "Moxd1"     | 2.1088705   | 2.1371047   | 2.0306485   | 2.0576172   | 2.0947137   | 2.7639015   | 2.0977225   | 2.079102    |
| "Mpdu1"     | 7.269674    | 8.0700035   | 7.85003     | 8.133715    | 8.239386    | 8.301765    | 8.047983    | 8.2099495   |
| "Mpdz"      | 4.49427985  | 5.13517705  | 5.34863     | 5.54193675  | 5.4036914   | 5.1032087   | 5.5886144   | 5.62878285  |
| "Mpeg1"     | 11.382389   | 10.05859    | 11.903393   | 11.734023   | 10.76885    | 10.418403   | 10.9569025  | 10.783423   |
| "Mpg"       | 5.4233895   | 5.8668974   | 6.07297635  | 5.8017457   | 5.79876805  | 5.593137    | 5.9489345   | 5.6279993   |
| "Mphosph10" | 6.5165033   | 6.28244     | 5.7303463   | 5.55887315  | 5.8880308   | 5.9646607   | 5.69833065  | 5.7321465   |
| "Mphosph6"  | 5.8108616   | 5.5394306   | 5.656743    | 5.1502986   | 4.6089664   | 4.745611    | 5.4501457   | 5.329379    |
| "Mphosph8"  | 6.124464733 | 6.275924467 | 6.1294816   | 5.881613167 | 6.0570492   | 6.434649567 | 5.824564133 | 5.915570567 |
| "Mphosph9"  | 3.619953733 | 3.750057767 | 3.771848733 | 4.0571419   | 3.686536167 | 3.989042033 | 3.865095767 | 3.8327992   |
| "Mpi"       | 2.8819525   | 3.1373055   | 3.1951547   | 2.830661    | 2.8957748   | 2.9649374   | 2.9321554   | 2.919978    |
| "Mpl"       | 1.8537726   | 1.8168068   | 1.798452    | 1.8093665   | 2.4102092   | 1.8277291   | 1.7080257   | 1.8262377   |
| "Mpnd"      | 9.543247    | 9.891132    | 9.864519    | 9.840385    | 9.2541895   | 9.497409    | 9.179384    | 9.754719    |
| "Mpo"       | 2.3458695   | 2.282307    | 3.4109519   | 2.2687798   | 2.3015003   | 3.2878473   | 2.3031244   | 2.285632    |
| "Mpp1"      | 7.287267    | 7.270555    | 8.599168    | 8.068601    | 7.771604    | 7.526577    | 8.3579645   | 8.286864    |
| "Mpp2"      | 2.661656    | 2.6359744   | 2.5846725   | 2.6007047   | 2.6613727   | 2.762368    | 2.6383054   | 2.6602442   |
| "Mpp4"      | 2.7012525   | 2.7712617   | 2.5912004   | 2.6335223   | 2.8326724   | 2.7040172   | 2.6874194   | 2.787261    |
| "Mpp5"      | 5.4929223   | 5.672532267 | 5.5665719   | 5.847585233 | 5.418727433 | 5.631584267 | 5.499882167 | 5.494454433 |
| "Mpp6"      | 7.5416313   | 7.710858    | 7.38711725  | 7.57754015  | 7.84798335  | 7.79001065  | 8.0348312   | 7.950677    |
| "Mpp7"      | 4.811909    | 5.37987     | 4.6342883   | 5.2792      | 5.1560225   | 5.410459    | 5.3052025   | 5.2500253   |
| "Mprp"      | 8.191625    | 8.3081      | 8.221008    | 7.956255    | 8.264777    | 8.389514    | 8.038165    | 8.245241    |
| "Mpst"      | 6.383472    | 6.9431      | 6.098647    | 6.9488206   | 6.7892346   | 6.5389633   | 7.1746044   | 6.8571754   |

|           |             |             |             |             |             |             |             |             |
|-----------|-------------|-------------|-------------|-------------|-------------|-------------|-------------|-------------|
| "Mpv17"   | 8.561869    | 7.978862    | 8.607286    | 8.593133    | 8.5830145   | 8.576284    | 8.735906    | 8.653833    |
| "Mpv17"   | 5.086897    | 5.3603177   | 5.7016788   | 5.327061    | 4.7817655   | 4.755273    | 4.829031    | 4.854328    |
| "Mpz"     | 2.469261    | 2.487296    | 2.3875935   | 2.412334    | 2.4546387   | 2.4492218   | 2.4572487   | 2.4384725   |
| "Mpz12"   | 9.481705167 | 8.128960133 | 7.822586667 | 8.151203533 | 7.506120667 | 7.603933333 | 7.974189767 | 7.614017667 |
| "Mr1"     | 2.6643122   | 2.74216     | 3.33705725  | 2.6492635   | 2.846404    | 2.8082639   | 3.18069235  | 2.87086115  |
| "Mrap"    | 6.493397    | 6.38555935  | 6.2075225   | 5.8460875   | 6.3693525   | 6.0417607   | 5.9545904   | 5.84992215  |
| "Mras"    | 2.4634147   | 2.5603209   | 2.5502987   | 2.8866873   | 2.5674312   | 2.5597973   | 2.5732777   | 2.555005    |
| "Mrc1"    | 10.988848   | 9.58258     | 10.664286   | 10.528942   | 10.14494    | 10.38121    | 10.571251   | 10.096368   |
| "Mrc2"    | 2.7302208   | 2.6357572   | 2.5616353   | 2.667491    | 2.7008443   | 2.692688    | 2.6999454   | 2.6861668   |
| "Mre11a"  | 2.9005284   | 3.1079686   | 3.6264017   | 2.8802924   | 3.0268028   | 3.0695372   | 3.201564    | 3.0217829   |
| "Mrfap1"  | 11.644363   | 11.541046   | 11.666457   | 11.375395   | 11.556502   | 11.490544   | 11.556246   | 11.40606    |
| "Mrgpra1" | 2.4042828   | 2.3766837   | 2.387038    | 2.3627694   | 2.401081    | 2.3957136   | 2.3971624   | 2.401255    |
| "Mri1"    | 4.62387825  | 4.798121    | 4.6659933   | 4.669029    | 4.7194091   | 4.8645235   | 4.64921005  | 4.7529945   |
| "Mrm1"    | 3.5382912   | 3.3851447   | 3.178312    | 3.421887    | 3.6384494   | 3.8586175   | 3.4709346   | 3.7805662   |
| "Mrp63"   | 5.8983732   | 6.38516775  | 6.1386025   | 6.25103575  | 6.171872    | 6.34303775  | 6.0940639   | 6.17404625  |
| "Mrpl1"   | 5.4809397   | 5.667623867 | 5.592500367 | 5.687448833 | 5.7637427   | 5.740186067 | 6.034635333 | 5.7791237   |
| "Mrpl10"  | 7.5600257   | 7.9643693   | 7.975626    | 7.985649    | 7.9282455   | 7.8618665   | 7.990327    | 7.863962    |
| "Mrpl11"  | 6.62171255  | 7.012857375 | 6.97745285  | 6.88986995  | 7.054389875 | 6.960264475 | 7.03203845  | 7.06673025  |
| "Mrpl12"  | 10.535702   | 10.935615   | 10.726987   | 10.716881   | 10.932975   | 10.7698765  | 10.75153    | 10.988884   |
| "Mrpl13"  | 7.871619    | 8.142685967 | 7.769110333 | 7.935839333 | 7.907247767 | 8.0510212   | 8.298252333 | 8.021552033 |
| "Mrpl14"  | 7.2391005   | 7.9640665   | 8.108357    | 8.416733    | 8.066302    | 7.935932    | 8.003993    | 8.152405    |
| "Mrpl15"  | 7.528148429 | 7.574487671 | 7.493932314 | 7.482485886 | 7.596630814 | 7.356512743 | 7.482970614 | 7.392979086 |
| "Mrpl16"  | 8.797982    | 9.724298    | 9.7029085   | 9.552783    | 9.627198    | 9.422798    | 9.44904     | 9.556579    |
| "Mrpl17"  | 6.2240224   | 6.4915595   | 6.215137    | 6.13803935  | 6.2870798   | 6.4351453   | 6.07979715  | 6.10110985  |
| "Mrpl18"  | 9.644493    | 9.3096695   | 9.971221    | 9.826048    | 9.824305    | 9.573884    | 9.965587    | 10.182164   |
| "Mrpl19"  | 5.160287367 | 5.308689667 | 5.2535138   | 5.04902667  | 4.9848037   | 5.2416074   | 5.304828067 | 5.1516321   |
| "Mrpl2"   | 9.29849     | 9.903904    | 9.645323    | 9.848409    | 9.953333    | 9.880669    | 9.965654    | 9.965167    |
| "Mrpl20"  | 9.210249    | 9.855312    | 9.450394    | 9.4852      | 9.612653    | 10.031714   | 9.219835    | 9.7171      |
| "Mrpl21"  | 5.0990286   | 5.1932571   | 5.04323295  | 4.93027985  | 5.05087615  | 5.1930252   | 5.11588735  | 5.37093045  |
| "Mrpl22"  | 8.740442    | 9.342046    | 9.848339    | 9.883013    | 9.558723    | 9.479909    | 9.85861     | 9.882932    |
| "Mrpl23"  | 8.306296    | 8.665694    | 9.173227    | 8.562094    | 8.464466    | 7.8767056   | 8.634487    | 8.708286    |
| "Mrpl24"  | 10.29372    | 10.39753    | 10.10371    | 10.340225   | 10.376101   | 10.7899     | 10.243212   | 10.455429   |
| "Mrpl27"  | 10.436192   | 11.164952   | 11.55837    | 11.572365   | 10.990606   | 10.831097   | 11.14178    | 11.185139   |
| "Mrpl28"  | 7.861275767 | 8.158369667 | 8.130466333 | 8.1510725   | 8.226401    | 8.170635333 | 8.345662    | 8.241917833 |
| "Mrpl3"   | 5.694827667 | 5.567042333 | 5.714859133 | 5.708118067 | 5.678230567 | 5.646600067 | 5.725671233 | 5.689981533 |
| "Mrpl32"  | 9.120269    | 9.239142    | 9.127115    | 9.268125    | 9.082153    | 9.275751    | 9.333636    | 9.28868     |
| "Mrpl33"  | 5.66431045  | 5.5222624   | 5.65893215  | 5.55856145  | 5.60189385  | 5.51521115  | 5.6716355   | 5.59597665  |
| "Mrpl34"  | 7.927906    | 8.338736    | 7.7445183   | 7.8598247   | 8.266134    | 8.625188    | 7.9270644   | 8.027464    |
| "Mrpl35"  | 9.15662     | 9.394767    | 9.455303    | 9.378928    | 9.35832     | 9.404674    | 9.438759    | 9.439521    |
| "Mrpl36"  | 7.358392    | 7.710385    | 7.758401    | 7.778401    | 7.740576    | 7.885865    | 8.0877075   | 7.8953314   |
| "Mrpl37"  | 6.4108996   | 6.750375    | 6.6210914   | 6.712348    | 6.9995737   | 6.690926    | 6.7202697   | 7.0141406   |
| "Mrpl38"  | 5.38398765  | 5.2562606   | 5.241651    | 5.37196195  | 5.4959995   | 5.50836835  | 5.50854715  | 5.7834843   |
| "Mrpl39"  | 9.8077295   | 9.7543105   | 10.074417   | 10.1984965  | 10.1518825  | 10.08364425 | 10.469292   | 10.302401   |
| "Mrpl4"   | 6.6929355   | 7.3254185   | 7.2119613   | 7.238661    | 7.3129272   | 7.4224863   | 7.2721114   | 7.280924    |
| "Mrpl40"  | 8.526053    | 8.678827    | 8.625485    | 8.582992    | 8.559747    | 8.349483    | 8.669664    | 8.372712    |
| "Mrpl41"  | 9.149996    | 9.392281    | 9.3107695   | 9.465877    | 9.3626235   | 9.1473415   | 9.336519    | 9.429872    |
| "Mrpl42"  | 10.265779   | 10.157523   | 10.54181    | 10.471274   | 10.227387   | 9.8395195   | 10.630459   | 10.479047   |
| "Mrpl43"  | 9.492844    | 9.6523905   | 9.521666    | 9.318843    | 9.577464    | 9.745347    | 9.454981    | 9.489576    |
| "Mrpl44"  | 8.329221767 | 8.582812667 | 8.339811433 | 8.6035252   | 8.456199233 | 8.688792667 | 8.699681    | 8.412459667 |
| "Mrpl45"  | 6.866235    | 6.7552843   | 7.516661    | 7.156258    | 6.752307    | 6.919184    | 7.080984    | 6.997253    |
| "Mrpl46"  | 8.108086    | 8.47489     | 8.522842    | 8.385287    | 8.340586    | 8.259217    | 8.388565    | 8.369203    |
| "Mrpl47"  | 8.504187    | 8.928186    | 8.421204    | 8.689635    | 8.94839     | 9.087896    | 8.810896    | 9.067766    |
| "Mrpl48"  | 7.7462705   | 8.0575625   | 8.065682    | 8.04917565  | 7.900439    | 7.725676    | 8.1697595   | 8.036502    |
| "Mrpl49"  | 6.286235    | 6.86174825  | 6.9726355   | 7.1362269   | 6.9217093   | 6.54744815  | 7.26473485  | 7.202359    |
| "Mrpl50"  | 7.60726585  | 7.31720675  | 8.0633688   | 7.70875015  | 7.49424185  | 7.63376225  | 8.3418405   | 8.1173993   |
| "Mrpl51"  | 5.5526744   | 5.6706135   | 5.893957767 | 5.6134834   | 5.7168966   | 5.614882467 | 5.669019567 | 5.6881296   |
| "Mrpl52"  | 8.26045915  | 8.538207375 | 8.50940795  | 8.39383605  | 8.42387065  | 8.30786325  | 8.5354929   | 8.45377595  |
| "Mrpl54"  | 7.791473    | 8.49396     | 8.214155    | 8.045862    | 7.918389    | 7.6356196   | 8.082019    | 7.775852    |
| "Mrpl55"  | 6.728219    | 7.511899    | 7.2099233   | 7.366104    | 7.201678    | 7.266029    | 7.1813717   | 7.2627053   |
| "Mrpl9"   | 7.2358745   | 7.36246225  | 6.31012735  | 6.760145    | 6.7602117   | 7.2891247   | 6.6250372   | 7.056799    |
| "Mrps11"  | 4.4638026   | 4.44061505  | 4.44839685  | 4.479481    | 4.45267     | 4.46636685  | 4.50071025  | 4.5255821   |
| "Mrps12"  | 8.985882    | 9.328377    | 9.510731    | 9.34134     | 9.639392    | 9.429064    | 9.501536    | 9.45459     |
| "Mrps14"  | 7.751862    | 7.802253    | 8.04904515  | 8.03993035  | 7.93847385  | 7.87880815  | 8.34785875  | 7.96921225  |
| "Mrps15"  | 7.8819212   | 8.20095915  | 8.446214    | 8.293158    | 8.0474063   | 7.8260505   | 8.6115305   | 8.413572    |
| "Mrps16"  | 9.074536    | 9.51518     | 9.675968    | 9.686635    | 9.514302    | 9.474805    | 9.820827    | 9.594478    |
| "Mrps17"  | 9.3749695   | 10.166827   | 9.872882    | 9.8467865   | 9.890755    | 9.793375    | 9.81538     | 9.777474    |
| "Mrps18a" | 8.799734    | 9.381254    | 9.656768    | 9.673897    | 8.726454    | 8.697779    | 9.374083    | 9.219173    |
| "Mrps18b" | 8.76557     | 9.336224    | 8.672314    | 8.557665    | 9.199556    | 9.404649    | 8.7143135   | 8.869659    |
| "Mrps18c" | 9.996211    | 10.2913     | 10.241096   | 10.367119   | 10.330234   | 10.328862   | 10.521779   | 10.460152   |
| "Mrps2"   | 6.2298982   | 6.26291245  | 6.1093235   | 6.0360644   | 6.34966875  | 6.418545    | 6.13547885  | 6.0384865   |
| "Mrps21"  | 8.586157    | 8.904276    | 8.810473    | 9.154953    | 8.82234     | 8.682191    | 9.0279045   | 9.081098    |
| "Mrps22"  | 8.661194    | 8.688887    | 9.475487    | 9.026729    | 9.286474    | 9.377816    | 9.33093     | 9.291658    |
| "Mrps23"  | 7.3606797   | 7.12323235  | 6.7931293   | 6.539913    | 6.8216555   | 7.23930025  | 6.57841945  | 6.7220435   |
| "Mrps24"  | 10.4463605  | 11.1304055  | 10.6557695  | 10.752032   | 10.8105725  | 10.7930555  | 10.50945075 | 10.8037     |
| "Mrps25"  | 3.967255667 | 4.109331867 | 4.4607201   | 4.2615125   | 3.9378499   | 4.010471933 | 4.4232376   | 4.330091033 |
| "Mrps26"  | 8.280148    | 8.535151    | 7.6446896   | 7.638305    | 8.037283    | 8.131628    | 7.9267893   | 7.9315305   |
| "Mrps28"  | 8.800369    | 9.391127    | 9.462194    | 9.263262    | 9.234022    | 9.179451    | 9.3427105   | 9.25762     |
| "Mrps30"  | 8.109292    | 8.189109    | 7.8121696   | 8.007229    | 8.20284     | 8.81539     | 8.097721    | 8.405606    |
| "Mrps31"  | 9.185447    | 9.148007    | 8.927238    | 8.807433    | 9.207736    | 9.267824    | 8.955333    | 8.864853    |
| "Mrps33"  | 9.043785    | 9.552471    | 9.2239895   | 9.372541    | 9.317888    | 9.408713    | 9.491142    | 9.254782    |
| "Mrps34"  | 8.603849    | 9.0439856   | 9.1090225   | 9.0785805   | 9.1385835   | 9.0275507   | 9.1122845   | 9.0052787   |

|           |             |             |             |             |             |             |             |             |
|-----------|-------------|-------------|-------------|-------------|-------------|-------------|-------------|-------------|
| "Mrps35"  | 8.370891    | 8.792524    | 8.462135    | 8.747239    | 8.679496    | 8.957912    | 8.760108    | 8.7637005   |
| "Mrps36"  | 7.977959    | 8.007309    | 8.094696    | 8.226973    | 8.027653    | 7.8108644   | 7.978174    | 8.235032    |
| "Mrps5"   | 6.53821255  | 6.8072227   | 6.9563365   | 6.69975025  | 6.97248195  | 6.8116155   | 6.972146    | 6.8588065   |
| "Mrps6"   | 6.261613    | 5.9321895   | 6.414165    | 6.2795672   | 6.143816    | 6.198327    | 6.3068094   | 6.490522    |
| "Mrps7"   | 8.388035    | 9.046895    | 8.992694    | 8.898045    | 9.039355    | 8.751437    | 8.629712    | 8.831591    |
| "Mrps9"   | 6.6353875   | 6.864752875 | 6.3382635   | 6.5577492   | 6.809940275 | 6.693061025 | 6.733787575 | 6.80959585  |
| "Mrrf"    | 8.039458    | 8.230448    | 8.054665    | 7.865988    | 7.9881916   | 7.966501    | 7.7676363   | 7.783509    |
| "Mrvi1"   | 3.087395    | 3.085559    | 2.919302    | 3.3191423   | 3.1396017   | 3.184157    | 3.0764349   | 3.155103    |
| "Ms4a1"   | 2.79335355  | 2.8086979   | 3.7161393   | 2.7549981   | 2.864897    | 2.8585739   | 3.70879475  | 2.9118935   |
| "Ms4a3"   | 2.1993184   | 2.1597807   | 2.3685973   | 2.1468196   | 2.180294    | 2.1755624   | 2.183453    | 2.1662512   |
| "Ms4a4b"  | 3.7697696   | 3.44070955  | 4.73275925  | 4.3615712   | 4.1786403   | 3.49765415  | 4.4688243   | 4.1662573   |
| "Ms4a4c"  | 3.9610397   | 2.77652825  | 6.55995765  | 4.3676124   | 3.02447775  | 3.1104152   | 4.00668905  | 3.17896775  |
| "Ms4a4d"  | 8.200963    | 7.2730336   | 8.085513    | 7.8889318   | 7.213441    | 7.4915266   | 8.199927    | 7.6210327   |
| "Ms4a6b"  | 8.607624    | 6.6207843   | 8.703519    | 7.4604483   | 6.836501    | 7.5661764   | 6.8150477   | 5.8691444   |
| "Ms4a6c"  | 9.148073    | 6.733917    | 8.937424    | 7.641229    | 6.9270616   | 8.145852    | 7.3045716   | 6.2500925   |
| "Ms4a6d"  | 7.108565267 | 5.249293267 | 6.5791155   | 5.830392133 | 5.6262073   | 6.155299167 | 5.3851402   | 4.936829633 |
| "Ms4a7"   | 5.027667    | 3.8859587   | 5.4922543   | 4.902484    | 3.9988992   | 3.8853762   | 4.687096    | 4.21975     |
| "Ms4a8a"  | 7.6574745   | 6.3921857   | 5.4095      | 4.5363417   | 4.7916307   | 6.5447264   | 4.6969047   | 4.1853228   |
| "Msc"     | 2.4575446   | 2.5205936   | 2.4678063   | 2.400693    | 2.4648993   | 2.4557664   | 2.4687843   | 2.428963    |
| "Msh2"    | 3.61772465  | 3.2644137   | 4.2112985   | 3.856167    | 3.21198855  | 3.30861545  | 3.54851315  | 3.5565721   |
| "Msh3"    | 3.82702415  | 3.8749787   | 3.6918598   | 3.9990469   | 3.9728036   | 4.05398585  | 4.20734535  | 3.9617973   |
| "Msh4"    | 2.4274225   | 2.3973205   | 2.311114    | 2.37568     | 2.423335    | 2.4157932   | 2.421999    | 2.409005    |
| "Msh6"    | 7.1313505   | 6.38182     | 6.5044765   | 6.6961823   | 5.98492     | 6.6234245   | 6.862312    | 6.5473175   |
| "Msi1"    | 2.5213375   | 2.5012357   | 2.4362025   | 2.4544601   | 2.5607963   | 2.5246701   | 2.5149217   | 2.565192    |
| "Msi2"    | 2.3589977   | 2.361876    | 2.26141995  | 2.3142679   | 2.361231    | 2.5484065   | 2.4497863   | 2.3373772   |
| "Msl1"    | 6.137429375 | 6.18970445  | 6.514289875 | 6.525369625 | 6.308503125 | 6.6437776   | 6.487315525 | 6.6626383   |
| "Msl2"    | 7.2937924   | 7.0394436   | 7.136502633 | 7.155651733 | 7.162824667 | 7.2792896   | 7.366023667 | 7.1946362   |
| "Msl3"    | 8.690855    | 8.571798    | 8.869076    | 9.080341    | 8.649086    | 8.944256    | 8.979704    | 8.73951     |
| "Msl3l2"  | 3.0475714   | 2.7886362   | 2.777492    | 2.7558606   | 2.8079743   | 2.8051834   | 2.816489    | 2.799802    |
| "Mslin"   | 4.9476757   | 3.1844187   | 4.6118774   | 3.232958    | 3.2348206   | 3.1671805   | 3.111179    | 3.1874278   |
| "Msn"     | 6.55138215  | 5.3365613   | 6.7056742   | 6.39799815  | 5.8502195   | 5.83778405  | 6.1340795   | 5.94915425  |
| "Msr1"    | 7.5072595   | 5.158423525 | 7.134028025 | 6.156151875 | 5.674264675 | 5.701038275 | 5.75485685  | 5.50032105  |
| "Msra"    | 9.5271635   | 10.201857   | 9.984714    | 10.661013   | 10.133951   | 9.707519    | 10.250334   | 10.266237   |
| "Msrb2"   | 5.88104     | 6.294664    | 6.5299006   | 6.4070573   | 6.816707    | 6.5893      | 6.8986053   | 6.335144    |
| "Mst1"    | 10.1326065  | 10.411512   | 10.602631   | 10.417393   | 10.364107   | 10.511704   | 10.445549   | 10.6452055  |
| "Msto1"   | 4.390158    | 4.9035892   | 4.7121625   | 4.5293856   | 4.573992    | 4.5806837   | 4.7398977   | 4.3251495   |
| "Msx1"    | 2.8086386   | 2.7719729   | 2.75072745  | 2.751924    | 2.7905641   | 2.9107245   | 2.77170455  | 2.81533275  |
| "Msx2"    | 2.3848045   | 2.3561633   | 2.2949147   | 2.3183575   | 2.3808856   | 2.3772297   | 2.3767521   | 2.3698428   |
| "Mtl1"    | 12.523571   | 9.63762885  | 10.7504075  | 10.3074265  | 8.91749515  | 10.8333615  | 7.1736159   | 9.5998725   |
| "Mtl2"    | 14.642209   | 13.299962   | 13.578013   | 12.986842   | 11.703921   | 13.486508   | 9.659624    | 11.066322   |
| "Mtl3"    | 3.3779418   | 3.7126935   | 3.1802044   | 3.2653413   | 3.5664554   | 3.6731377   | 3.2979012   | 3.4342496   |
| "Mtl4"    | 2.843832    | 2.8315659   | 2.712901    | 2.757812    | 2.8418446   | 2.8597312   | 2.8288746   | 2.835019    |
| "Mta1"    | 6.290695    | 6.7651696   | 6.3931026   | 6.406331    | 6.128191    | 6.526207    | 6.471642    | 6.443093    |
| "Mta2"    | 5.25102     | 5.4698005   | 5.2782283   | 5.3550906   | 5.6499543   | 5.3909154   | 5.3603253   | 5.2880425   |
| "Mta3"    | 6.3237217   | 6.5757656   | 6.53158535  | 6.26252335  | 6.665833    | 6.0300656   | 6.439213    | 6.319898    |
| "Mtap"    | 5.62307385  | 6.61371405  | 7.07974255  | 6.7291424   | 6.877293075 | 6.45745545  | 7.1887911   | 6.549444475 |
| "Mtap1b"  | 2.4178693   | 2.3846478   | 2.35799     | 2.376088    | 2.413819    | 2.4129026   | 2.419808    | 2.3983119   |
| "Mtap1s"  | 2.614436    | 2.5195272   | 3.9284954   | 2.971126    | 2.6831012   | 2.7318459   | 3.1467638   | 2.5489588   |
| "Mtap4"   | 4.9195127   | 4.419472467 | 5.1000534   | 4.930141233 | 4.6546093   | 4.8055551   | 4.970931867 | 5.111816733 |
| "Mtap6"   | 2.8531978   | 2.8606472   | 2.7904134   | 2.7800157   | 2.921129    | 2.9204779   | 2.8756652   | 2.9335814   |
| "Mtap7"   | 5.3968879   | 5.9587844   | 4.521950833 | 4.543969667 | 5.069703233 | 4.946048667 | 4.747179367 | 4.6420005   |
| "Mtap7d1" | 7.06653     | 6.519636    | 7.4168277   | 7.101639    | 6.718686    | 6.821639    | 6.6917073   | 6.8310394   |
| "Mtbp"    | 2.7534018   | 2.7019672   | 2.6336718   | 2.7708898   | 2.7346692   | 2.728767    | 2.739514    | 2.719524    |
| "Mtch1"   | 6.7793965   | 7.1384287   | 7.563861    | 7.406613    | 7.335309    | 6.836304    | 7.461441    | 7.2633095   |
| "Mtch2"   | 7.25112308  | 7.59809486  | 7.11225946  | 7.24189038  | 7.33633112  | 7.5344563   | 7.33641022  | 7.36702972  |
| "Mtcp1"   | 4.610343433 | 4.5984802   | 4.7486917   | 4.933339933 | 4.708424667 | 4.878723867 | 4.806614333 | 4.844623367 |
| "Mtdh"    | 8.4329536   | 8.444360175 | 8.053625    | 7.93716975  | 8.181089825 | 8.271979225 | 8.023709575 | 7.964464425 |
| "Mterfd1" | 9.347666    | 8.940711    | 8.761194    | 8.933083    | 9.2972355   | 9.503832    | 9.147063    | 9.236873    |
| "Mterfd2" | 6.7886786   | 7.0754576   | 7.0275583   | 7.09594     | 6.891558    | 7.217965    | 7.153941    | 7.197731    |
| "Mterfd3" | 2.6640499   | 4.101234    | 5.7402644   | 5.247739    | 4.139357    | 3.5886552   | 5.742626    | 4.1339774   |
| "Mtf1"    | 5.2938783   | 5.6342193   | 5.53527665  | 5.58389445  | 5.75485225  | 5.1116527   | 5.3608815   | 5.3287166   |
| "Mtf2"    | 5.11575355  | 5.138935625 | 5.5409025   | 5.350654825 | 4.95816505  | 5.2006305   | 5.466506675 | 5.2922231   |
| "Mtfmt"   | 6.0850124   | 6.027684    | 6.3721113   | 6.058748    | 5.831765    | 6.0906734   | 6.35426     | 6.327531    |
| "Mtfp1"   | 7.5702167   | 7.0528755   | 7.41959     | 7.238414    | 7.9971247   | 8.253126    | 8.1623955   | 8.036087    |
| "Mtftr1"  | 7.88879935  | 8.33874865  | 7.233591    | 7.88332085  | 8.0411015   | 7.97996285  | 8.12268065  | 8.0251757   |
| "Mtg1"    | 6.391837    | 7.5687466   | 6.989243    | 7.194433    | 7.466508    | 7.4334116   | 6.947801    | 7.226733    |
| "Mthfd1"  | 9.770042667 | 9.725508    | 10.22187    | 10.33576767 | 10.12175233 | 9.775710333 | 10.86995267 | 10.22243033 |
| "Mthfd2"  | 2.5642693   | 2.5218518   | 2.477542    | 2.516703    | 2.5463688   | 2.9183643   | 2.5360198   | 2.5337696   |
| "Mthfr"   | 7.1634817   | 5.340086    | 6.8357296   | 5.7659574   | 5.85615     | 6.3268814   | 6.1887755   | 5.3992257   |
| "Mthf2"   | 7.881902    | 8.357166    | 8.256916    | 8.278106    | 8.46484     | 8.641654    | 8.702933    | 8.720246    |
| "Mtm1"    | 4.8068493   | 4.8595199   | 4.763751867 | 5.135665767 | 5.1930638   | 5.146384967 | 5.068338567 | 5.282241833 |
| "Mtmr1"   | 4.7082344   | 5.26196785  | 4.98821735  | 5.21429785  | 4.8861648   | 5.1400036   | 4.89898775  | 5.2598933   |
| "Mtmr10"  | 7.618166    | 8.762289    | 7.653027    | 8.0251465   | 8.655348    | 7.987059    | 8.019986    | 7.963933    |
| "Mtmr14"  | 7.934772    | 7.304141    | 7.4757547   | 7.9895477   | 7.5484357   | 7.379996    | 7.7375116   | 7.5742517   |
| "Mtmr2"   | 5.42076255  | 5.55209055  | 5.3713951   | 5.1411522   | 5.3013742   | 5.2436094   | 5.4123921   | 5.1171855   |
| "Mtmr3"   | 2.8460524   | 2.7953472   | 2.6319177   | 2.4438508   | 2.8357472   | 2.883335    | 2.8213334   | 2.8822138   |
| "Mtmr4"   | 5.29050965  | 6.28290465  | 5.7901232   | 5.40710615  | 6.7316775   | 6.300175    | 6.13072065  | 5.686945    |
| "Mtmr6"   | 7.93262515  | 7.61918025  | 7.66559685  | 7.649439275 | 7.741532175 | 7.99053     | 7.93723425  | 7.71519395  |
| "Mtmr9"   | 6.134565767 | 6.682925733 | 6.8494951   | 6.794029967 | 6.810542567 | 6.345659333 | 6.967932833 | 6.725411633 |
| "Mtnr1a"  | 2.3648994   | 2.3381      | 2.264478    | 2.295418    | 2.3579872   | 2.563258    | 2.3547053   | 2.369581    |
| "Mto1"    | 4.7558648   | 4.91651045  | 4.769704    | 4.9727169   | 5.00096585  | 4.99262175  | 5.1161536   | 5.0482928   |

|           |             |             |             |             |             |             |             |             |
|-----------|-------------|-------------|-------------|-------------|-------------|-------------|-------------|-------------|
| "Mtor"    | 4.99715295  | 5.47617435  | 5.16101345  | 5.24128135  | 5.4514014   | 5.1655646   | 5.27682075  | 5.5589567   |
| "Mtpn"    | 9.5883386   | 9.44669514  | 9.6428526   | 9.55787     | 9.51882176  | 9.1036994   | 9.76424754  | 9.59174672  |
| "Mtrr"    | 4.7680926   | 4.3347135   | 4.289092    | 4.292298    | 4.3593163   | 4.5484157   | 4.1177173   | 4.3483157   |
| "Mts1"    | 9.745065867 | 9.878290167 | 8.8589265   | 9.322809933 | 9.580578667 | 9.778209567 | 8.961565333 | 9.494959867 |
| "Mttp"    | 9.3622575   | 10.531604   | 9.66695525  | 9.6079625   | 10.8513465  | 10.660347   | 9.825929    | 9.8594785   |
| "Mtx1"    | 7.6424191   | 8.58973765  | 8.59067575  | 8.51273775  | 8.73156975  | 8.5186081   | 8.7458025   | 8.6656477   |
| "Mtx2"    | 9.71645     | 10.220165   | 9.80665     | 9.890865    | 10.096546   | 10.019146   | 10.201544   | 10.026653   |
| "Muc13"   | 3.14303875  | 3.1899992   | 2.99626325  | 3.02753195  | 3.1962565   | 3.29789115  | 3.1009692   | 3.3125439   |
| "Muc15"   | 2.5733585   | 2.543433    | 2.509685    | 2.5126932   | 2.567951    | 2.5538783   | 2.5627406   | 2.5481687   |
| "Muc5b"   | 2.4537628   | 2.4252553   | 2.365728    | 2.3969362   | 2.4504924   | 2.441886    | 2.4416955   | 2.4358199   |
| "Muc1"    | 3.062048    | 3.0806324   | 2.895228    | 2.9600089   | 3.1126218   | 3.110127    | 3.0176885   | 3.3811173   |
| "Mudeng"  | 5.045769467 | 5.3160409   | 5.251800133 | 5.434322933 | 5.335403    | 5.342783533 | 5.432489733 | 5.443439167 |
| "Mug-ps1" | 13.42646    | 14.377314   | 13.570364   | 13.579833   | 14.009955   | 14.303107   | 13.874253   | 13.973879   |
| "Mug1"    | 12.918137   | 13.671454   | 12.622943   | 13.072223   | 13.357714   | 13.791972   | 13.344534   | 13.397821   |
| "Muli1"   | 5.8336379   | 5.5289235   | 5.3540541   | 5.1497675   | 5.28030275  | 5.4342374   | 5.19600355  | 5.2295375   |
| "Mum1"    | 6.2293396   | 5.8648167   | 6.594514    | 6.3407025   | 5.869159    | 5.958262    | 6.309454    | 6.266802    |
| "Mup3"    | 6.71482375  | 8.58886075  | 5.46780275  | 8.6195405   | 8.53275905  | 8.98534015  | 8.3996705   | 9.23115745  |
| "Mup4"    | 2.9989944   | 2.9931884   | 2.8556619   | 2.9208865   | 3.0041108   | 3.0468233   | 2.9554741   | 3.0255985   |
| "Mup5"    | 3.7115927   | 5.994399    | 3.4618113   | 6.458452    | 6.16164     | 6.275116    | 6.1767554   | 6.8066263   |
| "Murc"    | 2.5792654   | 2.5450199   | 2.495473    | 2.5069425   | 2.5659943   | 2.5576868   | 2.5634854   | 2.5546584   |
| "Mus81"   | 2.9433216   | 2.93739235  | 2.8902644   | 3.05198355  | 3.05230475  | 3.17737045  | 2.9553654   | 2.9459566   |
| "Musk"    | 2.5333478   | 2.504074    | 2.4795868   | 2.456809    | 2.5308902   | 2.5262032   | 2.5306544   | 2.513424    |
| "Mustn1"  | 6.509331    | 5.821787    | 5.9909377   | 5.9766817   | 6.036272    | 6.1197047   | 5.6531725   | 5.479459    |
| "Mut"     | 8.0473716   | 8.377957267 | 8.2456681   | 8.360878    | 8.148969367 | 8.1895765   | 8.1761001   | 8.373273667 |
| "Muted"   | 7.3491764   | 8.319928    | 8.638086    | 8.632553    | 8.260828    | 8.1213875   | 8.846249    | 8.322349    |
| "Mutyh"   | 2.5123153   | 2.4755998   | 2.3477354   | 2.458764    | 2.4985085   | 2.4937358   | 2.489769    | 2.5153618   |
| "Mvd"     | 6.2999165   | 5.91202215  | 8.0687885   | 5.89759255  | 3.0605793   | 2.849705    | 2.96710055  | 5.35190465  |
| "Mvk"     | 6.1965875   | 4.74494575  | 6.59256775  | 5.042984    | 3.2613703   | 2.6046789   | 4.40038765  | 4.6694429   |
| "Mvp"     | 6.630555    | 6.395965    | 7.305049    | 6.71554     | 5.8262653   | 5.8499994   | 5.8759146   | 5.9188395   |
| "Mx1"     | 5.1034794   | 4.1394114   | 6.3917737   | 4.2136016   | 3.8682997   | 2.7036061   | 4.2160687   | 3.875896    |
| "Mx2"     | 5.395328    | 2.1864514   | 3.1423445   | 3.3527982   | 2.2035985   | 2.2885711   | 2.2067664   | 2.2814825   |
| "Mxd1"    | 2.6988792   | 2.6668236   | 2.6362636   | 2.6497333   | 2.6849055   | 2.6756623   | 2.6883423   | 2.6705313   |
| "Mxd3"    | 3.6404768   | 3.6655696   | 3.52129125  | 3.5603753   | 3.6315968   | 3.6220497   | 3.6309701   | 3.6351788   |
| "Mxd4"    | 5.23557005  | 5.300564    | 5.22350695  | 5.446416625 | 5.262395575 | 5.223645025 | 5.02702845  | 5.2956234   |
| "Mxi1"    | 5.9031488   | 5.4994595   | 4.4466377   | 5.08463395  | 5.0907262   | 5.43968395  | 4.99384435  | 5.13916065  |
| "Mxra8"   | 5.8339486   | 5.862139    | 5.9229155   | 6.0240893   | 6.261892    | 6.047427    | 5.7922945   | 5.854419    |
| "Myadm"   | 8.11926715  | 8.428965    | 8.9301185   | 8.8665145   | 7.99795335  | 7.9801322   | 8.5577852   | 8.42258715  |
| "Myb"     | 2.655924033 | 2.629487433 | 2.5619115   | 2.562656533 | 2.684886633 | 2.932941867 | 2.608726067 | 2.666902533 |
| "Mybbp1a" | 6.9473878   | 7.4236985   | 6.8439087   | 6.3090533   | 6.9079723   | 7.4332257   | 6.323756    | 6.45335625  |
| "Mybl1"   | 2.9000673   | 2.879697    | 2.7999713   | 2.812038    | 2.9251606   | 2.9247465   | 2.8984027   | 2.9292724   |
| "Mybl2"   | 2.5097384   | 2.488322    | 2.3975804   | 2.436699    | 2.5059733   | 2.5037525   | 2.4968834   | 2.4987783   |
| "Myc"     | 10.706332   | 7.24754     | 8.073312    | 7.429143    | 5.9226503   | 6.3586125   | 4.1862764   | 6.7303114   |
| "Mycbp"   | 5.6308427   | 6.03617414  | 5.9601605   | 6.15087636  | 6.1251464   | 5.76609572  | 6.2361302   | 6.12575494  |
| "Mycbp2"  | 8.562659    | 8.408808    | 8.766685    | 8.307755    | 8.480867    | 8.396039    | 8.690527    | 8.291094    |
| "Mycbpap" | 3.0948942   | 3.0930152   | 2.9371214   | 2.9931993   | 3.1590025   | 3.158919    | 3.0526803   | 3.2483017   |
| "Mycl1"   | 3.9125712   | 5.344733    | 4.740344    | 4.5108013   | 6.5401506   | 5.0057435   | 5.227517    | 5.010181    |
| "Mycn"    | 3.0471296   | 3.0518384   | 2.983934167 | 2.983486233 | 3.1629796   | 3.109640467 | 3.0284861   | 3.1305097   |
| "Mycs"    | 2.4822066   | 2.446272    | 2.3997061   | 2.4344249   | 2.4669478   | 2.4569275   | 2.4686005   | 2.452462    |
| "Myct1"   | 3.581447    | 3.5261014   | 3.5223167   | 3.9175918   | 3.5665343   | 3.569715    | 3.570671    | 3.5569866   |
| "Myd88"   | 7.4390874   | 7.190272    | 7.9415092   | 7.614953    | 7.2200003   | 7.194587    | 7.0877004   | 7.03623     |
| "Myef2"   | 3.3991523   | 3.2982373   | 3.50198855  | 3.29798485  | 3.3101541   | 3.39050785  | 3.45386205  | 3.56124175  |
| "Myeov2"  | 10.554722   | 10.612759   | 10.6413545  | 10.635099   | 10.334091   | 10.2842165  | 10.5183045  | 10.4075765  |
| "Myf5"    | 3.0498874   | 3.0301936   | 2.8892624   | 2.9362264   | 3.084369    | 3.0825386   | 2.9858768   | 3.0879664   |
| "Myf6"    | 2.5454233   | 2.51526     | 2.472184    | 2.4954598   | 2.5424175   | 2.5409346   | 2.5269654   | 2.53922     |
| "Myg1"    | 7.176214    | 7.1320715   | 7.28021     | 7.1718507   | 7.2780995   | 7.3154597   | 7.530777    | 7.3280783   |
| "Myh1"    | 2.53421095  | 2.5085305   | 2.43103765  | 2.4656509   | 2.56908115  | 2.53434135  | 2.5234491   | 2.52686825  |
| "Myh11"   | 2.8834326   | 2.9912402   | 2.8108516   | 3.0020029   | 3.0114994   | 3.6513328   | 2.90295925  | 3.1222181   |
| "Myh14"   | 3.3169234   | 4.7653666   | 5.1847086   | 4.9758987   | 3.6718223   | 3.8765128   | 5.3608875   | 4.224024    |
| "Myh2"    | 2.4429314   | 2.410073    | 2.3606791   | 2.3821807   | 2.4359355   | 2.4192557   | 2.4291408   | 2.4253197   |
| "Myh3"    | 3.2512748   | 3.4311385   | 2.9800272   | 3.224551    | 3.2728372   | 3.2839708   | 3.2084918   | 3.3660922   |
| "Myh4"    | 3.0620463   | 3.0450177   | 2.9672575   | 2.975697    | 3.1349597   | 3.0680091   | 3.0588133   | 3.0629659   |
| "Myh6"    | 2.911658467 | 2.8947051   | 2.7676879   | 2.821048733 | 2.9614879   | 2.957527467 | 2.8641623   | 2.977228367 |
| "Myh8"    | 3.0502505   | 3.0283468   | 2.9649017   | 2.9673624   | 3.0978527   | 3.101135    | 3.0168645   | 3.0597901   |
| "Myh9"    | 9.401662875 | 8.4587326   | 9.429935925 | 9.10097475  | 8.481964    | 8.354997    | 8.957187875 | 8.7554275   |
| "Myl1"    | 2.4892638   | 2.5265708   | 2.4162374   | 2.389282    | 2.5235426   | 2.5054562   | 2.451204    | 2.50089     |
| "Myl12a"  | 7.49529185  | 6.9756022   | 7.08237215  | 6.8983533   | 6.80145965  | 6.5548718   | 6.98590975  | 6.701908    |
| "Myl12b"  | 6.6516796   | 6.68531575  | 6.9137809   | 6.83369265  | 6.59594665  | 6.57994825  | 6.751731    | 6.68546605  |
| "Myl2"    | 2.4915357   | 2.304706    | 2.257454    | 2.2715182   | 2.3158271   | 2.312492    | 2.3134737   | 2.306902    |
| "Myl3"    | 2.76072215  | 2.74639345  | 2.70363175  | 2.81853745  | 2.7860986   | 2.7510972   | 2.6566918   | 2.834463    |
| "Myl4"    | 2.8949647   | 2.8035927   | 2.72019825  | 2.78225425  | 2.8239802   | 2.8139043   | 2.8260466   | 2.92503525  |
| "Myl6"    | 3.2357981   | 3.097696    | 3.73985     | 3.0132232   | 3.0689816   | 3.1081657   | 2.9053383   | 2.9943452   |
| "Myl6b"   | 2.7559295   | 2.7112837   | 2.6256156   | 2.6858547   | 2.7744145   | 2.7732153   | 2.754476    | 2.7715719   |
| "Myl7"    | 2.50758     | 2.4722962   | 2.4426522   | 2.4255865   | 2.4939294   | 2.4507115   | 2.4999712   | 2.4928558   |
| "Myl9"    | 3.8976896   | 3.8256702   | 4.4811525   | 3.9030082   | 3.8590024   | 4.0421305   | 3.6006813   | 3.8484266   |
| "Mylip"   | 8.795801    | 9.1933775   | 8.470934    | 8.600899    | 9.364016    | 9.409612    | 8.6770935   | 8.4254002   |
| "Mylk"    | 8.753608    | 9.530884    | 8.812027    | 9.0968485   | 9.3658095   | 9.056865    | 9.306981    | 9.104229    |
| "Mylpf"   | 3.6584082   | 3.6274168   | 3.7894905   | 3.5951862   | 3.6441798   | 3.6341412   | 3.648799    | 3.6333716   |
| "Mynn"    | 3.57409205  | 3.372222675 | 3.4174199   | 3.6329286   | 3.66353515  | 3.68239325  | 4.018317525 | 3.610892575 |
| "Myo10"   | 4.2765437   | 4.073375433 | 4.216446533 | 4.3834254   | 4.223290167 | 4.0890503   | 4.3400026   | 4.440917833 |
| "Myo15"   | 2.4576812   | 2.4369617   | 2.3966503   | 2.387222    | 2.4563885   | 2.5709124   | 2.440463    | 2.5760174   |
| "Myo15b"  | 2.50541125  | 2.4724902   | 2.8066512   | 2.4888033   | 2.50084985  | 2.4835445   | 2.49650465  | 2.48681055  |

|           |             |             |             |             |             |             |             |             |
|-----------|-------------|-------------|-------------|-------------|-------------|-------------|-------------|-------------|
| "Myo18a"  | 8.006124    | 8.163792    | 8.613597    | 8.826168    | 7.4307547   | 8.301678    | 8.314904    | 8.200834    |
| "Myo19"   | 3.9109333   | 4.5304136   | 3.9265482   | 4.357875    | 4.607404    | 4.8740215   | 4.393631    | 4.373296    |
| "Myo1b"   | 9.250674833 | 9.363686333 | 9.17806     | 9.200572667 | 9.907493333 | 9.724612    | 9.561380667 | 9.524660333 |
| "Myo1c"   | 6.612382967 | 6.031294067 | 6.199322433 | 6.027788133 | 6.283897733 | 6.348368267 | 6.165142    | 6.014860467 |
| "Myo1d"   | 6.0076175   | 6.2255793   | 6.336984    | 6.078032    | 6.10029     | 5.8132467   | 6.489261    | 6.0495996   |
| "Myo1e"   | 3.592049633 | 3.091398333 | 2.700252333 | 2.741260567 | 2.8165601   | 2.832815067 | 2.8198423   | 2.826778667 |
| "Myo1f"   | 2.3147476   | 2.2844276   | 2.3301442   | 2.2799897   | 2.3070836   | 2.3005059   | 2.298079    | 2.2936978   |
| "Myo1g"   | 2.7814517   | 2.6488667   | 3.9613764   | 2.9374847   | 2.7677808   | 2.7575955   | 2.7711658   | 2.732932    |
| "Myo5a"   | 2.58231035  | 2.5482961   | 2.48472285  | 2.51553605  | 2.5740533   | 2.5762914   | 2.5632097   | 2.5607582   |
| "Myo5b"   | 5.9940114   | 6.336338    | 7.2123594   | 5.877228    | 5.9747887   | 5.372038    | 6.106591    | 6.222408    |
| "Myo5c"   | 2.582045    | 2.5538363   | 2.5179088   | 2.4920447   | 2.5744958   | 2.5682354   | 2.526228    | 2.593615    |
| "Myo6"    | 5.6131537   | 5.968882    | 5.4963669   | 6.030726333 | 5.9704256   | 5.885491433 | 5.7750292   | 6.1531818   |
| "Myo7a"   | 6.9472504   | 6.0822034   | 6.8045673   | 6.549182    | 6.608882    | 6.5919456   | 6.3622465   | 5.6665115   |
| "Myo7b"   | 2.3720863   | 2.342629    | 2.3086722   | 2.327395    | 2.3672767   | 2.363359    | 2.3521461   | 2.4225159   |
| "Myo9a"   | 5.2220864   | 3.9365625   | 5.549904    | 5.3733587   | 4.416363    | 4.3472104   | 4.8851576   | 4.4629777   |
| "Myo9b"   | 6.8322744   | 6.5342855   | 6.979453    | 7.0818      | 6.55897     | 6.5953865   | 6.177318    | 6.4372444   |
| "Myoc"    | 2.576792    | 2.5442517   | 2.4916275   | 2.485048    | 2.572449    | 2.57113     | 2.5522168   | 2.5538437   |
| "Myocd"   | 2.438124    | 2.4154027   | 2.3459635   | 2.3742087   | 2.4611905   | 2.4664552   | 2.4228547   | 2.4256601   |
| "Myof"    | 2.7360169   | 2.47996055  | 2.8591648   | 2.68025315  | 2.54942     | 2.50419495  | 2.47904995  | 2.546153    |
| "Myog"    | 2.483632    | 2.4544516   | 2.3738227   | 2.4180477   | 2.6190596   | 2.4758976   | 2.4687016   | 2.47784     |
| "Myom1"   | 3.9000013   | 3.1139727   | 2.53985     | 2.4797394   | 2.6811497   | 4.3732944   | 2.122133    | 2.5801957   |
| "Myoz1"   | 2.5229793   | 2.495831    | 2.3954687   | 2.4767115   | 2.525703    | 2.5135703   | 2.5067563   | 2.5249412   |
| "Myoz2"   | 2.4487247   | 2.4162548   | 2.3394997   | 2.402177    | 2.4423773   | 2.4424605   | 2.4285095   | 2.4316347   |
| "Mypop"   | 2.5312462   | 2.510505    | 2.5955486   | 2.2598574   | 2.5326      | 2.5292587   | 2.5315585   | 2.5162454   |
| "Myst2"   | 5.31007815  | 4.3945292   | 4.1180936   | 4.41105045  | 4.61672595  | 4.5111307   | 4.5035727   | 4.5429369   |
| "Myst3"   | 6.520028    | 6.5266175   | 6.942304    | 7.0306      | 6.812106    | 7.0414453   | 7.0173326   | 6.957669    |
| "Myst4"   | 6.2943544   | 5.819347    | 5.8206277   | 5.6804605   | 5.8517365   | 5.989486    | 6.273188    | 5.7577996   |
| "Myt1"    | 3.1194303   | 3.131328    | 2.9674718   | 3.109492    | 3.2405152   | 3.128616    | 3.0802596   | 3.1269145   |
| "Myt11"   | 2.47542025  | 2.4502429   | 2.4553585   | 2.43902075  | 2.477255    | 2.52199105  | 2.47053385  | 2.4602445   |
| "Myzap"   | 4.029886    | 3.5949845   | 3.7458873   | 3.4052315   | 3.707701    | 3.7190595   | 3.7471728   | 3.4438183   |
| "Mzt2"    | 7.2729845   | 8.038853    | 7.77312     | 7.800694    | 7.6637063   | 7.517355    | 7.5295467   | 7.8815794   |
| "N4bp1"   | 4.5783916   | 4.403271    | 4.755861    | 4.659705    | 4.797418    | 4.605995    | 4.762477    | 4.622239    |
| "N4bp21"  | 10.44922    | 10.206546   | 9.591211    | 10.313373   | 10.320096   | 11.656812   | 11.131526   | 10.242147   |
| "N4bp3"   | 2.628601    | 2.5599842   | 2.5825882   | 2.5696769   | 2.6150286   | 2.6793523   | 2.6452315   | 2.6009696   |
| "N6amt2"  | 5.634302167 | 6.170694333 | 6.599532567 | 6.475797333 | 5.3972461   | 5.8752525   | 6.041548067 | 5.731223667 |
| "Naa10"   | 7.2637315   | 7.302421    | 7.757705    | 7.4557004   | 7.420801    | 7.307889    | 7.584771    | 7.639082    |
| "Naa11"   | 2.660334    | 2.6327453   | 2.5596888   | 2.5934982   | 2.672323    | 2.6482034   | 2.6364274   | 2.6891105   |
| "Naa15"   | 7.66626575  | 7.69167175  | 7.6986213   | 7.5660552   | 7.73034775  | 7.796437325 | 7.749422375 | 7.7701425   |
| "Naa20"   | 7.517178    | 8.557956    | 8.630719    | 8.253866    | 7.2870417   | 8.475225    | 8.508552    | 7.0733347   |
| "Naa30"   | 8.273977    | 8.522306    | 8.205514    | 8.409918    | 8.340567    | 8.684921    | 8.559225    | 8.432777    |
| "Naa35"   | 7.489330667 | 7.617802333 | 7.630309933 | 7.747547833 | 7.587044233 | 7.728897567 | 8.009408233 | 8.1454295   |
| "Naa38"   | 7.898408    | 7.8917713   | 8.075288    | 7.7402883   | 7.33463     | 7.3611097   | 7.741861    | 7.8431325   |
| "Naa40"   | 5.8387737   | 5.779324    | 6.1651506   | 5.740118    | 5.802749    | 5.66665     | 5.5313473   | 5.676528    |
| "Naaa"    | 4.720455    | 4.32053755  | 5.31171415  | 4.688627    | 4.31525075  | 4.4444958   | 4.53145385  | 4.525722    |
| "Naalad2" | 3.02862215  | 2.83146125  | 3.35743025  | 3.0310066   | 2.9510779   | 2.8754171   | 2.9669266   | 2.87341975  |
| "Nab1"    | 9.2900105   | 8.8890725   | 8.71667415  | 8.8554745   | 8.1433338   | 8.5812967   | 8.33492085  | 8.8897965   |
| "Nab2"    | 4.4090133   | 4.707094    | 4.7391257   | 5.4686756   | 4.634659    | 4.676342    | 5.671894    | 4.576735    |
| "Naca"    | 13.0945865  | 13.0824715  | 12.7582115  | 12.542641   | 12.83314    | 13.031765   | 12.527953   | 12.6782045  |
| "Nacc1"   | 3.9269279   | 3.8261219   | 3.7342615   | 3.80494735  | 4.2087687   | 3.75256815  | 3.84892455  | 3.83251525  |
| "Nacc2"   | 3.387541167 | 3.906101633 | 3.6454749   | 3.795866667 | 3.911989933 | 3.8225881   | 3.9146485   | 3.7744537   |
| "Nadk"    | 8.445425    | 8.008538    | 8.50575765  | 8.6454235   | 8.4074875   | 8.361428    | 8.684953    | 8.48995285  |
| "Nae1"    | 9.903498    | 9.859712    | 9.491968    | 9.493732    | 9.421452    | 9.761196    | 9.643494    | 9.734043    |
| "Naf1"    | 8.592662    | 7.9657397   | 7.832814    | 8.022041    | 7.553435    | 8.027507    | 8.231172    | 7.9273114   |
| "Naga"    | 7.184117    | 7.4691      | 7.511726    | 7.538018    | 7.506133    | 7.7928753   | 7.3799667   | 7.4097705   |
| "Nagk"    | 6.9264836   | 7.1424875   | 8.345401    | 7.787628    | 7.2607594   | 7.0870643   | 7.9251585   | 7.408155    |
| "Naglu"   | 5.7669945   | 6.2011356   | 6.570526    | 6.6869254   | 6.2138934   | 5.9498415   | 6.189795    | 5.9857874   |
| "Nags"    | 8.619683    | 8.159538    | 8.22282     | 8.178552    | 8.247822    | 8.445025    | 8.4322605   | 7.9689755   |
| "Naip1"   | 3.69449     | 3.3126948   | 3.323492    | 3.3338046   | 3.3596923   | 3.3563304   | 3.3488252   | 3.3463023   |
| "Naip2"   | 7.085456    | 5.9344497   | 8.002289    | 6.8533792   | 6.489923    | 6.3746953   | 6.9842978   | 5.946334    |
| "Naip3"   | 2.4274416   | 2.3941817   | 2.365528    | 2.3650672   | 2.5121934   | 2.4069078   | 2.415103    | 2.4012115   |
| "Naip5"   | 6.3959184   | 4.5901117   | 6.2455387   | 6.3000865   | 5.235249    | 4.8438406   | 5.8893704   | 5.00303     |
| "Naip6"   | 2.506035    | 2.4694617   | 2.6841743   | 2.7152061   | 2.4913542   | 2.4801006   | 2.658058    | 2.4757855   |
| "Namp1"   | 6.82364365  | 6.8671183   | 6.29179135  | 6.08335515  | 6.250152    | 5.86293275  | 5.6718458   | 6.038132    |
| "Nanog"   | 2.570094    | 2.5396943   | 2.4526973   | 2.490521    | 2.5690837   | 2.5656552   | 2.5511265   | 2.5635853   |
| "Nanos1"  | 2.4368691   | 2.409204    | 2.3322911   | 2.3700237   | 2.4337473   | 2.444245    | 2.4261024   | 2.4545994   |
| "Nanp"    | 8.610189    | 8.502274    | 7.8786974   | 8.461964    | 8.560873    | 8.647566    | 8.350851    | 8.855328    |
| "Nans"    | 4.44254965  | 4.5832338   | 5.1122263   | 4.9099057   | 4.7628956   | 4.378421    | 5.20911     | 4.79775235  |
| "Nap111"  | 9.272216271 | 9.120592357 | 8.314367    | 7.784236671 | 8.864653714 | 9.301964057 | 8.265700486 | 8.16952     |
| "Nap112"  | 2.4997036   | 2.4714122   | 2.400619    | 2.4365659   | 2.4952464   | 2.4916403   | 2.4958827   | 2.4952173   |
| "Nap113"  | 3.20035     | 2.7929769   | 4.552136    | 3.2956042   | 2.8451755   | 2.8378928   | 3.0491512   | 2.8719454   |
| "Nap114"  | 8.830156    | 9.194405    | 8.869679    | 8.854625    | 9.152781    | 8.897833    | 8.756963    | 8.875827    |
| "Nap115"  | 2.9106534   | 2.8756137   | 2.8184977   | 2.8470566   | 2.8980277   | 2.8892534   | 2.891233    | 2.891287    |
| "Napa"    | 6.94209725  | 6.7250519   | 6.443923    | 6.268517    | 6.3422198   | 6.5017128   | 5.98304325  | 6.0987942   |
| "Napb"    | 3.141325867 | 3.022400867 | 2.9856824   | 3.012156967 | 3.351215633 | 3.040048667 | 3.040235333 | 3.153480333 |
| "Napg"    | 6.4549961   | 6.6404487   | 6.2270148   | 6.12178     | 6.2731338   | 5.96771595  | 6.17932575  | 6.0227808   |
| "Napsa"   | 2.836939    | 2.4094198   | 3.2440643   | 2.3782296   | 2.4337735   | 2.430201    | 2.4261394   | 2.4882252   |
| "Narf1"   | 4.1371692   | 5.7749328   | 5.0148699   | 5.828260167 | 5.812815567 | 5.338933133 | 5.221793267 | 5.850913367 |
| "Narfl"   | 5.519769    | 5.6684527   | 5.5313587   | 5.402537    | 5.8597913   | 5.495215    | 5.4719734   | 5.3353677   |
| "Narg2"   | 5.69214325  | 6.50409885  | 6.18465515  | 6.3814222   | 6.5667632   | 6.699715    | 6.7023568   | 6.44322175  |
| "Nars"    | 8.9712385   | 8.7905275   | 9.0804775   | 8.970572    | 9.3566695   | 9.331924    | 8.771724    | 9.1667495   |
| "Nasp"    | 4.9738212   | 4.95809005  | 4.7830807   | 4.7864082   | 5.0024128   | 5.2910203   | 4.82523585  | 5.2116275   |

|           |             |             |             |             |             |             |             |             |
|-----------|-------------|-------------|-------------|-------------|-------------|-------------|-------------|-------------|
| "Nat1"    | 2.468015    | 2.6230946   | 2.6138453   | 2.9696999   | 2.6695526   | 2.6574543   | 2.6731417   | 2.728206    |
| "Nat15"   | 7.8505163   | 8.624685    | 7.8055067   | 8.70019     | 8.658241    | 8.420006    | 8.225942    | 8.815731    |
| "Nat2"    | 7.235985    | 8.613149    | 8.286592    | 8.776428    | 8.687602    | 8.181222    | 8.4571085   | 8.950473    |
| "Nat3"    | 2.5088444   | 2.4802747   | 2.4051435   | 2.439386    | 2.5047297   | 2.5007892   | 2.4967878   | 2.4939425   |
| "Nat6"    | 5.813156    | 5.7745137   | 5.808115    | 5.873677    | 6.070203    | 6.144855    | 5.949125    | 5.8092594   |
| "Nat8"    | 3.109746    | 6.0571613   | 2.6090834   | 6.8304505   | 3.234578    | 3.8305755   | 2.6408758   | 7.463186    |
| "Nat9"    | 6.8260136   | 7.299115    | 7.4660983   | 7.702096    | 7.574448    | 7.2223473   | 7.510555    | 7.529905    |
| "Nav2"    | 2.7917671   | 3.2571437   | 3.4036531   | 3.5693135   | 3.339799    | 2.109705    | 3.8136115   | 3.4705706   |
| "Nbea"    | 3.5509      | 2.8803263   | 2.9811792   | 3.0208893   | 3.1628618   | 3.2424002   | 3.0927553   | 3.1369553   |
| "Nbeal2"  | 2.370846    | 2.3699071   | 2.3785102   | 2.3669112   | 2.412015    | 2.4322593   | 2.4163704   | 2.3966358   |
| "Nbn"     | 7.2698936   | 7.3850965   | 6.485184    | 6.905685    | 7.1545177   | 7.8712206   | 7.315257    | 7.624049    |
| "Nbr1"    | 8.7396645   | 8.91955335  | 8.8726715   | 9.07669865  | 9.08436     | 8.8226175   | 8.80730935  | 9.1197506   |
| "Ncald"   | 5.7648467   | 4.76883815  | 7.0574422   | 6.6848215   | 6.051446    | 4.6309445   | 6.9174337   | 6.1858368   |
| "Ncam1"   | 2.7321358   | 2.78595195  | 2.62416415  | 2.66730615  | 2.7320589   | 2.7279027   | 2.7172205   | 2.73865795  |
| "Ncam2"   | 2.51871385  | 2.4877761   | 2.76739565  | 3.65950175  | 2.512143    | 2.500216    | 2.4959403   | 2.5704122   |
| "Ncan"    | 2.8968673   | 2.9451997   | 2.8098512   | 2.8419843   | 2.8990285   | 2.914943    | 2.863724    | 2.8983545   |
| "Ncapd2"  | 2.6901536   | 2.918704    | 2.6482422   | 2.6356015   | 2.6787446   | 2.6947045   | 2.6594117   | 2.656042    |
| "Ncapg"   | 2.6626675   | 2.63571335  | 2.5632679   | 2.5961208   | 2.72301855  | 2.6770636   | 2.6581605   | 2.73484895  |
| "Ncapg2"  | 5.0163245   | 2.637734    | 5.7030964   | 5.211514    | 3.9747503   | 4.0051694   | 5.060914    | 3.7481227   |
| "Ncaph2"  | 4.714032167 | 4.930030167 | 4.767398433 | 4.920960233 | 5.041555367 | 5.030119333 | 4.934547167 | 4.9195022   |
| "Ncbp1"   | 6.6972346   | 7.1901135   | 6.6807466   | 6.6036644   | 7.3329673   | 7.4164867   | 6.4987783   | 6.7132635   |
| "Ncbp2"   | 6.463273933 | 6.632835133 | 7.269646233 | 7.222364367 | 6.949629767 | 7.108625667 | 7.2654533   | 7.269100667 |
| "Ncdn"    | 3.982455    | 3.6402153   | 2.8652338   | 2.81341385  | 2.8632976   | 2.9170975   | 2.91624515  | 2.5874858   |
| "Ncf1"    | 3.35997155  | 2.9695803   | 3.3407521   | 3.2462787   | 3.26586435  | 3.3127771   | 3.28442225  | 3.002568    |
| "Ncf2"    | 7.8095913   | 6.080421    | 7.4223075   | 6.9458556   | 6.5499325   | 6.655514    | 6.221422    | 5.8476477   |
| "Ncf4"    | 7.1071234   | 4.8360868   | 7.0722075   | 6.496366    | 5.856598    | 5.774046    | 5.990783    | 5.7287874   |
| "Nck1"    | 6.4370935   | 5.781611    | 6.123335    | 5.7405341   | 5.8924948   | 5.9594456   | 5.6568373   | 5.59696315  |
| "Nck2"    | 5.3763576   | 4.942231    | 5.730378    | 5.0970736   | 5.1367683   | 5.048621    | 5.1397943   | 5.122223    |
| "Nckap1"  | 10.3263645  | 10.847574   | 10.738018   | 10.971476   | 11.016719   | 11.077507   | 10.980783   | 10.994745   |
| "Nckap1i" | 5.4630442   | 3.908925    | 6.22128635  | 5.12757635  | 4.84269275  | 4.69352115  | 4.8872838   | 4.7597518   |
| "Ncl"     | 8.7586705   | 8.7314946   | 8.02774335  | 7.9755066   | 8.39702755  | 8.518861325 | 7.940184725 | 8.058355825 |
| "Ncln"    | 4.807981    | 4.999171    | 4.5712595   | 4.704972    | 4.4798746   | 5.1691628   | 4.727256    | 4.375195    |
| "Ncoa1"   | 7.55434155  | 7.2790778   | 7.095515    | 7.15309815  | 7.3068035   | 7.5339073   | 7.1496215   | 7.215976    |
| "Ncoa3"   | 3.2747698   | 4.3141737   | 4.3052835   | 4.3816037   | 3.603184    | 3.4757476   | 3.6110198   | 3.6429436   |
| "Ncoa4"   | 9.611159    | 9.5360895   | 8.4598045   | 7.998442    | 8.727523    | 9.4245785   | 8.0179335   | 8.14814235  |
| "Ncoa5"   | 2.7196941   | 2.6656067   | 2.627193    | 2.3058968   | 2.686156    | 2.909317    | 2.7115479   | 2.6704123   |
| "Ncoa6"   | 7.608118    | 7.5893073   | 7.6584897   | 7.6859307   | 7.7944636   | 7.918904    | 7.4363413   | 7.6829233   |
| "Ncor1"   | 9.029368667 | 9.106010667 | 8.864813333 | 9.101355667 | 9.108622    | 9.519011667 | 9.242901333 | 9.404538667 |
| "Ncor2"   | 3.25275365  | 3.57034515  | 3.2353848   | 3.3923268   | 3.72715465  | 3.48013185  | 3.6539055   | 3.600296    |
| "Ncstn"   | 2.8759918   | 2.8584132   | 2.824815    | 2.8472266   | 2.8908002   | 2.8745813   | 2.8620281   | 2.8649654   |
| "ND5"     | 14.186997   | 14.196936   | 14.0538845  | 14.186964   | 14.031164   | 13.717804   | 14.231615   | 13.962586   |
| "Ndc80"   | 2.668864    | 2.6390502   | 2.5612762   | 2.6146653   | 2.662062    | 2.667211    | 2.6559756   | 2.6629577   |
| "Nde1"    | 4.885269    | 5.061665    | 4.9984074   | 4.8434668   | 4.992056    | 5.009227    | 5.6036534   | 4.9971104   |
| "Ndel1"   | 8.3014396   | 7.28608475  | 7.4227431   | 7.9119356   | 7.8016642   | 7.94048545  | 7.64374915  | 7.94010425  |
| "Ndfip1"  | 11.627786   | 11.396807   | 11.121936   | 11.65140467 | 11.31772133 | 11.21234633 | 11.45613467 | 11.50962633 |
| "Ndfip2"  | 8.428652    | 8.94154     | 8.830074    | 9.005855    | 8.483937    | 8.733692    | 8.471328    | 8.836558    |
| "Ndn"     | 3.48854714  | 3.228458    | 3.7303642   | 3.39209438  | 3.3384961   | 3.25433842  | 4.29543132  | 3.40263548  |
| "Ndnl2"   | 9.4112625   | 7.735965    | 7.5822067   | 7.5737023   | 7.610497    | 8.218317    | 7.732379    | 7.5425773   |
| "Ndp"     | 2.5438654   | 2.5189567   | 2.4518454   | 2.4935656   | 2.5458856   | 2.548311    | 2.531416    | 2.547051    |
| "Ndrg1"   | 6.74953092  | 4.3568816   | 5.14467556  | 4.41565032  | 4.52050272  | 4.4250768   | 5.39850434  | 4.38676974  |
| "Ndrg2"   | 12.328509   | 12.673116   | 12.374589   | 12.94573    | 12.972176   | 12.847583   | 13.076745   | 13.046822   |
| "Ndrg3"   | 4.68946315  | 4.7711234   | 4.76499     | 4.75317925  | 5.08897935  | 5.0685297   | 4.70918145  | 4.9278683   |
| "Ndrg4"   | 2.67213165  | 2.6534988   | 2.5951262   | 2.6105226   | 2.7586975   | 2.72103985  | 2.64024905  | 2.7219224   |
| "Ndst1"   | 7.98921     | 8.54025915  | 8.9988725   | 9.1480685   | 8.8692675   | 8.5348753   | 9.209002    | 9.252561    |
| "Ndst2"   | 6.3012075   | 6.594566    | 5.386349    | 5.7845774   | 6.3227315   | 6.3588037   | 5.933999    | 6.1280713   |
| "Ndst3"   | 2.4957829   | 2.469461    | 2.3842895   | 2.4203672   | 2.4922912   | 2.48873     | 2.4906712   | 2.4830794   |
| "Ndufa1"  | 12.8125725  | 13.0673275  | 12.912785   | 13.074726   | 13.287584   | 13.2337265  | 13.473164   | 13.294704   |
| "Ndufa10" | 6.7875565   | 7.02410035  | 6.9752551   | 7.00100675  | 6.97742365  | 6.86039475  | 6.9078654   | 7.013456    |
| "Ndufa12" | 10.06303425 | 10.020684   | 9.6909967   | 9.7261912   | 9.70094545  | 9.7967535   | 9.675500125 | 9.909066    |
| "Ndufa13" | 12.1423235  | 12.644503   | 12.607447   | 12.718474   | 12.673814   | 12.578697   | 12.685962   | 12.672112   |
| "Ndufa2"  | 12.142748   | 12.237922   | 12.289867   | 12.116078   | 12.083083   | 12.0289345  | 12.239559   | 12.129119   |
| "Ndufa3"  | 11.6659925  | 12.252379   | 12.0256185  | 12.27891    | 12.1250325  | 11.86087925 | 12.3133425  | 12.3203125  |
| "Ndufa4"  | 12.380193   | 12.854449   | 12.544272   | 12.68029    | 12.556905   | 12.604274   | 12.659939   | 12.786756   |
| "Ndufa5"  | 10.12080675 | 10.404267   | 10.169308   | 10.23203025 | 10.344182   | 10.3357955  | 10.508761   | 10.494916   |
| "Ndufa6"  | 11.559717   | 11.848404   | 11.429085   | 11.48686    | 11.637757   | 11.743084   | 11.664214   | 11.628406   |
| "Ndufa7"  | 10.4527434  | 10.8595813  | 10.6031738  | 10.8561912  | 10.7381106  | 10.5877888  | 10.6898562  | 10.7280762  |
| "Ndufa8"  | 10.436323   | 11.237494   | 10.644922   | 10.611693   | 11.464679   | 11.086738   | 10.747486   | 11.064714   |
| "Ndufa9"  | 10.503174   | 11.107368   | 10.892321   | 11.124083   | 11.100914   | 10.9388     | 11.264383   | 11.345686   |
| "Ndufab1" | 7.4638547   | 8.2379345   | 7.806364175 | 8.079301675 | 8.335984625 | 8.276089375 | 8.475709425 | 8.38378375  |
| "Ndufaf1" | 8.248155    | 8.444938    | 9.196924    | 9.262489    | 9.0693035   | 8.482644    | 9.326939    | 9.277164    |
| "Ndufaf3" | 7.0206184   | 7.693152    | 7.7571297   | 7.64424     | 7.642999    | 7.62231     | 7.849086    | 7.5490284   |
| "Ndufaf4" | 8.7029535   | 9.25734     | 7.8609615   | 8.4907075   | 9.4325545   | 9.483953    | 8.663097    | 9.2265415   |
| "Ndufb10" | 11.017892   | 11.430763   | 11.447459   | 11.388417   | 11.440083   | 11.282059   | 11.802225   | 11.836459   |
| "Ndufb11" | 11.68961433 | 12.22640533 | 11.87713467 | 12.07045833 | 12.17498867 | 12.04157633 | 12.102392   | 12.29856533 |
| "Ndufb2"  | 10.4523675  | 11.07419975 | 10.980109   | 11.08122375 | 10.8495705  | 10.51630175 | 10.9891655  | 10.9668305  |
| "Ndufb3"  | 10.365321   | 11.401565   | 11.113047   | 11.247304   | 11.202739   | 11.163557   | 11.506472   | 11.536211   |
| "Ndufb5"  | 11.4271155  | 11.8709085  | 11.377189   | 11.6685775  | 11.716043   | 11.68116975 | 11.802596   | 11.788447   |
| "Ndufb6"  | 11.1824035  | 11.5031075  | 11.101579   | 11.366934   | 11.4324195  | 11.436762   | 11.918822   | 11.750706   |
| "Ndufb7"  | 9.890297    | 10.7048975  | 10.48937325 | 10.7304     | 10.7597175  | 10.316829   | 10.73131675 | 10.636414   |
| "Ndufb8"  | 11.07993    | 11.477617   | 11.261926   | 11.520783   | 11.50408    | 11.21622    | 11.580935   | 11.546707   |
| "Ndufb9"  | 8.9836679   | 9.445581833 | 9.181882333 | 9.358526167 | 9.510708867 | 9.4485569   | 9.4413392   | 9.558292833 |

|            |             |             |             |             |             |             |             |             |
|------------|-------------|-------------|-------------|-------------|-------------|-------------|-------------|-------------|
| "Ndufc1"   | 10.439137   | 11.152263   | 10.856123   | 10.898744   | 10.916837   | 10.847181   | 11.153211   | 11.091405   |
| "Ndufs1"   | 10.106323   | 10.701365   | 10.750463   | 10.756411   | 10.933642   | 10.794819   | 11.06549    | 10.943039   |
| "Ndufs2"   | 11.384279   | 11.342592   | 10.824116   | 10.99054    | 11.075671   | 11.543665   | 10.957307   | 11.272756   |
| "Ndufs3"   | 10.896313   | 11.491068   | 11.311672   | 11.450726   | 11.453815   | 11.433487   | 11.517047   | 11.660376   |
| "Ndufs4"   | 7.4914934   | 7.951660033 | 7.844587433 | 7.784146833 | 7.52683     | 7.367494067 | 8.060073267 | 7.780126    |
| "Ndufs7"   | 10.2704545  | 11.0105525  | 10.60326    | 10.5554735  | 10.85185    | 11.169505   | 10.6534145  | 10.8292005  |
| "Ndufs8"   | 9.01785615  | 9.323779267 | 9.529810167 | 9.569068867 | 9.387857833 | 9.19878     | 9.533009    | 9.605166433 |
| "Ndufv1"   | 10.74706567 | 11.249148   | 10.85418733 | 10.93433567 | 11.24708367 | 11.11941833 | 11.164226   | 11.27993733 |
| "Ndufv2"   | 10.93596983 | 11.51986483 | 11.320198   | 11.438481   | 11.48745    | 11.46931133 | 11.47316083 | 11.64390967 |
| "Ndufv3"   | 11.6393795  | 12.32589    | 12.27965    | 12.417393   | 12.149997   | 12.092711   | 12.309107   | 12.488127   |
| "Neat1"    | 8.635514    | 12.476655   | 11.567878   | 11.847388   | 10.381198   | 12.064981   | 10.931527   | 9.042158    |
| "Nebi"     | 2.3974586   | 2.369173    | 2.2989645   | 2.3263085   | 2.3986945   | 2.395058    | 2.3862405   | 2.3801827   |
| "Necab2"   | 3.8092546   | 3.8875072   | 3.8519318   | 3.8708396   | 3.9341185   | 3.8896182   | 3.8989491   | 4.082312    |
| "Necap1"   | 7.5819206   | 7.481471    | 7.3596964   | 7.5672016   | 7.6706414   | 7.5179243   | 7.307562    | 7.3975005   |
| "Necap2"   | 4.48609065  | 3.58776785  | 4.5227276   | 4.11072255  | 3.93544435  | 3.86789585  | 4.023266    | 3.80960135  |
| "Nedd1"    | 6.03525635  | 5.55660215  | 5.5891417   | 5.60211375  | 5.6493922   | 5.68354825  | 5.42442635  | 5.7965865   |
| "Nedd4"    | 9.223264333 | 9.795160667 | 9.277961767 | 9.485047667 | 10.429609   | 9.556287433 | 9.562637333 | 9.90825333  |
| "Nedd4l"   | 6.61238405  | 5.49209325  | 5.1996635   | 4.978127    | 5.4466029   | 5.6129035   | 5.33962815  | 4.87937865  |
| "Nedd8"    | 10.246094   | 10.2884     | 10.329775   | 10.335266   | 10.155498   | 10.275368   | 10.158401   | 10.189471   |
| "Nedd9"    | 6.9502266   | 6.2716619   | 6.794569    | 5.998069267 | 5.989188367 | 7.2295012   | 6.834090933 | 6.5482461   |
| "Nefh"     | 2.652104    | 2.5949042   | 2.5456386   | 2.571263    | 2.623073    | 2.6095831   | 2.5739825   | 2.6442385   |
| "Nefl"     | 2.6383476   | 2.6061373   | 2.5061493   | 2.576357    | 2.627427    | 2.6187243   | 2.6270328   | 2.6128564   |
| "Nefm"     | 2.489066    | 2.46781     | 2.364327    | 2.4114606   | 2.5176568   | 2.506891    | 2.4724495   | 2.4891913   |
| "Neil3"    | 2.6202204   | 2.5921423   | 2.5763578   | 2.549186    | 2.6655433   | 2.607257    | 2.6110284   | 2.606433    |
| "Nek1"     | 3.147283    | 3.3702686   | 3.2288673   | 3.4605596   | 4.011052    | 3.3725061   | 3.1882155   | 3.3128183   |
| "Nek2"     | 2.8767698   | 2.8466132   | 2.8061285   | 2.7967975   | 2.8549325   | 2.850261    | 2.8665123   | 2.8878202   |
| "Nek3"     | 3.896503    | 3.8784654   | 4.1030383   | 4.178579    | 3.7644012   | 3.6997766   | 4.2178936   | 3.6931703   |
| "Nek4"     | 3.9541038   | 4.1519507   | 4.0302986   | 3.74063755  | 3.809693    | 4.10589495  | 4.3276275   | 3.7774597   |
| "Nek6"     | 4.814299433 | 5.258035333 | 5.196639367 | 5.104625533 | 4.826550367 | 4.502626233 | 4.744440567 | 5.0313977   |
| "Nek7"     | 9.9280375   | 10.679833   | 9.6032405   | 9.9804365   | 10.277218   | 10.440204   | 10.133781   | 10.255697   |
| "Nek8"     | 3.7648296   | 3.5621724   | 3.3763213   | 3.6280417   | 3.5652218   | 3.5715744   | 3.5632367   | 3.5776563   |
| "Nek9"     | 9.756373    | 9.665628    | 9.723543    | 9.561552    | 9.7736435   | 9.808975    | 9.462086    | 9.555672    |
| "Nelf"     | 5.901122833 | 6.649863133 | 6.606305    | 6.677014567 | 6.9536161   | 6.643674033 | 6.707177    | 6.7216249   |
| "Nell2"    | 2.3985443   | 2.3697355   | 2.3400743   | 2.3538284   | 2.4045877   | 2.381312    | 2.3894782   | 2.3761368   |
| "Nemf"     | 2.5246441   | 2.5187588   | 2.43265     | 2.4928508   | 2.5266979   | 2.5183675   | 2.4938247   | 2.5041115   |
| "Nenf"     | 5.829545    | 5.9512725   | 6.976761    | 6.49994     | 6.1883607   | 5.28471     | 6.697571    | 6.5860853   |
| "Neo1"     | 3.4294426   | 3.6534154   | 3.4972804   | 3.9667706   | 3.5713794   | 3.5940447   | 3.6109202   | 3.5909808   |
| "Nes"      | 2.7813854   | 2.7838464   | 2.6947474   | 2.7328987   | 2.9409735   | 2.8613405   | 2.7796695   | 2.8283632   |
| "Net1"     | 7.657088    | 7.8458905   | 7.865197    | 7.2739944   | 6.370102    | 6.997461    | 7.5564356   | 6.255403    |
| "Neto1"    | 2.7100587   | 2.6756246   | 2.6298814   | 2.6651473   | 2.697523    | 2.6923108   | 2.6998565   | 2.6898665   |
| "Neu1"     | 4.5309839   | 4.5017552   | 4.722901967 | 4.509998733 | 4.276529    | 4.5786643   | 4.277528767 | 4.247015067 |
| "Neu3"     | 3.065515    | 3.325638    | 2.90392     | 3.047799    | 3.2364259   | 3.385462    | 3.0769453   | 3.3248634   |
| "Neurl1a"  | 2.6006372   | 2.7329984   | 2.544463    | 2.559174    | 2.6045856   | 2.594486    | 2.588002    | 2.580767    |
| "Neurl4"   | 5.0425763   | 4.215573    | 4.1617684   | 4.401471    | 4.5593386   | 5.0355372   | 4.563889    | 4.5292015   |
| "Neurod1"  | 2.6355414   | 2.6136928   | 2.5536737   | 2.5910535   | 2.6398656   | 2.6432734   | 2.6164656   | 2.624123    |
| "Neurod4"  | 2.82389725  | 2.81460365  | 2.7266084   | 2.7407571   | 2.88549605  | 2.914667    | 2.8106916   | 2.8657775   |
| "Neurod6"  | 2.7388055   | 2.712333    | 2.6016288   | 2.6640184   | 2.7567563   | 2.752788    | 2.7105935   | 2.7459598   |
| "Neurog1"  | 2.3895223   | 2.362438    | 2.290622    | 2.3226454   | 2.387702    | 2.3874369   | 2.371923    | 2.374034    |
| "Nfl1"     | 3.7408934   | 4.0355434   | 3.4260216   | 3.621751    | 3.663234    | 3.7159922   | 3.654832    | 3.5488684   |
| "Nfl2"     | 3.571345567 | 3.6263454   | 3.4936018   | 3.577842333 | 3.646600467 | 3.593366667 | 3.58122     | 3.5392228   |
| "Nfam1"    | 2.41410285  | 2.33427595  | 2.44730105  | 2.6115042   | 2.3497558   | 2.3443074   | 2.41377995  | 2.341828    |
| "Nfat5"    | 3.512725267 | 3.471770467 | 3.3903029   | 3.446517533 | 3.564450267 | 3.597118167 | 3.548270133 | 3.704508    |
| "Nfatc1"   | 3.0922494   | 3.1073756   | 3.2240381   | 3.3260574   | 3.164462    | 3.1898189   | 3.281573    | 3.3117537   |
| "Nfatc2"   | 2.23576015  | 2.33382555  | 2.17796805  | 2.43342065  | 2.2276398   | 2.3109173   | 2.24958045  | 2.21303735  |
| "Nfatc2ip" | 5.736005    | 5.6791053   | 5.753209    | 5.449701    | 5.8213487   | 6.0969024   | 5.725572    | 6.3544927   |
| "Nfatc3"   | 6.36753675  | 6.48961275  | 6.116086    | 6.562274    | 6.4978658   | 6.59127215  | 6.6929738   | 6.4350524   |
| "Nfatc4"   | 2.62840055  | 2.5975333   | 2.5470438   | 2.5425334   | 2.6208232   | 2.63928085  | 2.6115911   | 2.61031505  |
| "Nfe2"     | 2.0070367   | 1.9687781   | 1.73668003  | 1.9558101   | 1.9899887   | 1.9791464   | 1.9967787   | 1.977567    |
| "Nfe211"   | 6.538358    | 6.9508176   | 7.559754    | 7.7662096   | 7.4484725   | 7.4141197   | 7.142107    | 7.240061    |
| "Nfe212"   | 8.542729    | 8.856259    | 9.549992    | 9.986326    | 9.789034    | 9.383808    | 9.980952    | 10.153463   |
| "Nfe213"   | 2.6337761   | 2.61453435  | 2.51315005  | 2.55748675  | 2.6389752   | 2.63702235  | 2.6197983   | 2.63226785  |
| "Nfia"     | 5.88647495  | 6.00386775  | 5.6310326   | 5.77485185  | 5.9571073   | 6.1719208   | 5.75159235  | 5.8381256   |
| "Nfib"     | 6.16062315  | 6.84421325  | 6.55537665  | 6.8881339   | 6.99650895  | 6.660355525 | 7.24906715  | 7.194404675 |
| "Nfic"     | 4.0256159   | 4.3164199   | 4.036318725 | 4.312798525 | 4.518886375 | 4.296481725 | 4.29123595  | 4.3050529   |
| "Nfil3"    | 10.939023   | 7.0895085   | 7.0866966   | 6.1911545   | 5.8976154   | 7.7079563   | 7.001787    | 5.8765674   |
| "Nfix"     | 5.81792296  | 6.43314076  | 6.01019426  | 6.72897114  | 6.5852038   | 6.16681074  | 6.63440442  | 7.01730312  |
| "Nfkb1"    | 7.274454    | 6.008752    | 7.0067244   | 7.0749364   | 6.490093    | 6.4275174   | 6.512366    | 6.4634466   |
| "Nfkb2"    | 6.23645215  | 5.15821085  | 5.12810485  | 5.0080245   | 4.9646071   | 5.17943775  | 4.6358072   | 5.06246915  |
| "Nfkb1a"   | 11.53023725 | 9.891841075 | 10.18237858 | 10.87030275 | 10.1396881  | 10.15146565 | 10.0574794  | 10.2284234  |
| "Nfkbib"   | 7.031807    | 7.066854    | 6.623259    | 7.0629497   | 6.338097    | 6.6668506   | 5.7845507   | 6.3305535   |
| "Nfkbie"   | 4.6924944   | 3.2707727   | 3.9679      | 3.447256    | 3.408736    | 3.3529348   | 3.4267974   | 3.3953207   |
| "Nfkbil1"  | 5.959849    | 5.969295    | 5.374913    | 5.381622    | 5.137784    | 5.9015985   | 5.1815557   | 5.510922    |
| "Nfkbiz"   | 9.766401    | 6.7866135   | 9.2876565   | 8.5445675   | 6.896243    | 6.5854352   | 7.44058665  | 7.1210167   |
| "Nfs1"     | 7.22441025  | 7.59946425  | 7.1425187   | 7.2060787   | 7.3591508   | 6.946481    | 7.28945865  | 7.06968385  |
| "Nfu1"     | 8.6290125   | 9.04025     | 9.001384    | 9.023238    | 9.192908    | 8.920599    | 9.2083395   | 9.1800835   |
| "Nfx1"     | 5.4288165   | 6.154906133 | 5.5786298   | 5.934527333 | 5.894486567 | 6.1190498   | 5.850802633 | 6.271630833 |
| "Nfx11"    | 8.5562935   | 7.358005    | 7.9107122   | 7.4268384   | 8.087015    | 7.760476    | 7.979567    | 7.712677    |
| "Nfya"     | 2.6151605   | 3.0450091   | 3.339383    | 3.0435185   | 3.059175    | 3.0424275   | 3.078319    | 3.055171    |
| "Nfyb"     | 7.0548071   | 7.05723235  | 7.294152    | 7.30405575  | 7.2064953   | 7.0643545   | 7.84788275  | 7.89165     |
| "Nfyc"     | 7.9640474   | 8.257573    | 7.797677    | 7.938303    | 8.060704    | 8.124461    | 7.8357587   | 8.082169    |
| "Ngdn"     | 9.586786    | 9.0827245   | 8.46794765  | 8.5696324   | 8.741633    | 9.56772075  | 8.33236415  | 8.7031245   |

|             |             |             |             |             |             |             |             |             |
|-------------|-------------|-------------|-------------|-------------|-------------|-------------|-------------|-------------|
| "Ngef"      | 6.583355    | 6.2990284   | 7.543717    | 8.526701    | 6.595656    | 6.822277    | 8.384013    | 8.367312    |
| "Ngf"       | 2.3259661   | 2.2951252   | 2.427912    | 2.2790985   | 2.315116    | 2.306852    | 2.3086493   | 2.299976    |
| "Ngfr"      | 3.240863    | 3.208396    | 4.632128    | 3.1821282   | 2.9153426   | 2.903734    | 3.3442526   | 3.3431706   |
| "Ngfrap1"   | 5.012876    | 4.982716    | 5.0061073   | 4.9111767   | 4.9909472   | 4.625035    | 5.2818723   | 4.9809794   |
| "Ngly1"     | 9.919929    | 10.1447115  | 9.852561    | 10.10448    | 10.024076   | 10.389175   | 9.967394    | 9.999565    |
| "Ngp"       | 8.561928    | 3.2269087   | 7.8700047   | 6.0495167   | 4.0493803   | 8.469484    | 8.469976    | 3.9090185   |
| "Ngrn"      | 7.730919    | 7.6381125   | 7.655404    | 7.8053794   | 7.6380854   | 7.9172983   | 7.7088675   | 7.7200475   |
| "Nhedc1"    | 2.699535067 | 2.7291205   | 2.6206203   | 2.6337355   | 2.723690867 | 2.719535033 | 2.6490772   | 2.725623667 |
| "Nhedc2"    | 2.4050417   | 2.3889227   | 2.294762    | 2.4227977   | 2.4313776   | 2.4286683   | 2.3767138   | 2.3929906   |
| "Nhp2"      | 8.771114    | 9.1677655   | 8.667955    | 8.31562835  | 8.605119    | 8.91403525  | 8.2547725   | 8.2358918   |
| "Nhsl1"     | 6.585393    | 5.606309    | 5.6999664   | 5.7361727   | 5.567375    | 5.8211174   | 5.6473303   | 6.294511    |
| "Nhsl2"     | 2.9555278   | 3.0516403   | 2.8213365   | 2.8103929   | 2.9928365   | 2.9843774   | 2.9144146   | 2.9514673   |
| "Niacr1"    | 4.206772    | 2.093206    | 2.0431325   | 2.074432    | 2.1124446   | 2.1037438   | 2.1157541   | 2.098378    |
| "Nlcn1"     | 6.1767926   | 5.97203115  | 6.3756393   | 6.47421745  | 5.8520428   | 5.931285    | 6.37953725  | 5.5682542   |
| "Nid1"      | 6.9248325   | 5.94943905  | 8.1270198   | 6.468816    | 6.42329645  | 6.52101135  | 7.260019    | 6.20854625  |
| "Nid2"      | 2.805994    | 2.601851    | 3.4833517   | 3.0657978   | 2.3915937   | 2.3266783   | 3.4058027   | 2.7857985   |
| "Nif311"    | 5.6949925   | 6.1366425   | 6.8347554   | 6.152927    | 5.6035285   | 6.1807675   | 6.397519    | 6.1279116   |
| "Nin"       | 3.0258446   | 2.9911115   | 3.7520409   | 3.6884155   | 3.0155365   | 3.0115461   | 3.25561     | 2.4588065   |
| "Ninj1"     | 10.3113145  | 9.997084    | 10.6533995  | 10.2972275  | 9.8638355   | 9.6206248   | 9.8302525   | 9.8754825   |
| "Nip7"      | 6.91965175  | 6.42345115  | 6.18744915  | 6.134793    | 7.11513035  | 6.65528585  | 6.17232265  | 6.14833965  |
| "Nipa2"     | 8.0468885   | 8.13363585  | 8.01941165  | 7.92293625  | 8.1673315   | 7.982031    | 8.123565    | 7.971917    |
| "Nipal2"    | 2.6520786   | 2.592007    | 2.4991581   | 2.5818658   | 2.6236858   | 2.5876627   | 2.6036174   | 3.1718562   |
| "Nipbl"     | 6.798231    | 6.623825    | 6.9490128   | 7.0774417   | 6.7437205   | 7.286847    | 6.862672    | 7.152038    |
| "Nipsnap1"  | 10.039999   | 10.899422   | 11.13413    | 11.4720485  | 11.2302175  | 10.648714   | 11.5279665  | 11.5509725  |
| "Nipsnap3b" | 9.936308    | 10.4611     | 10.113924   | 10.459414   | 10.244032   | 10.366327   | 10.618139   | 10.476295   |
| "Nisch"     | 7.63566685  | 7.684037375 | 7.1106981   | 7.551971075 | 7.710864975 | 8.003485325 | 7.7683276   | 7.65169775  |
| "Nlt1"      | 8.265494    | 8.24047825  | 7.899145    | 8.1883135   | 8.1823955   | 8.52417215  | 8.09946885  | 8.12706915  |
| "Nlt2"      | 9.542255    | 10.207473   | 11.114534   | 11.695517   | 11.0215     | 10.655535   | 11.627589   | 11.663186   |
| "Nkain1"    | 2.4061089   | 2.3731582   | 2.2674387   | 2.3558362   | 2.3937132   | 2.3859942   | 2.3957863   | 2.4341757   |
| "Nkain4"    | 2.2727108   | 2.239519    | 2.3052773   | 2.2231746   | 2.2283044   | 2.2482173   | 2.2735252   | 2.0433927   |
| "Nkap"      | 3.22105635  | 3.21425795  | 3.03879105  | 3.0826      | 3.26751245  | 3.2914617   | 3.146296    | 3.2315099   |
| "Nkapl"     | 2.5426853   | 2.5336926   | 2.5042553   | 2.4807136   | 2.5525038   | 2.5669966   | 2.5574892   | 2.5391767   |
| "Nkd1"      | 3.111509    | 3.0894465   | 2.9430382   | 3.0378778   | 3.1105812   | 3.1048307   | 3.1268547   | 3.151107    |
| "Nkg7"      | 2.4025729   | 2.3619688   | 3.8173397   | 2.3539212   | 2.1281357   | 2.1194491   | 2.5728965   | 2.4051332   |
| "Nkiras1"   | 7.1004343   | 7.394644    | 7.183094    | 6.7947097   | 7.5030994   | 7.2172346   | 7.1968055   | 7.3034205   |
| "Nkiras2"   | 7.138931    | 7.133179    | 7.4601917   | 6.9620337   | 6.6755457   | 6.8482475   | 6.63226     | 6.5759673   |
| "Nkt1"      | 7.3637847   | 7.12090435  | 6.8064065   | 6.98620335  | 7.687685    | 7.17929365  | 6.89950635  | 7.27699735  |
| "Nkx2-3"    | 2.739657667 | 2.735195367 | 2.6996463   | 2.698243833 | 2.734409467 | 2.7313942   | 2.693293667 | 2.7233697   |
| "Nkx6-1"    | 2.5859776   | 2.5614693   | 2.4983327   | 2.7517154   | 2.5714447   | 2.5658066   | 2.5410259   | 2.6070898   |
| "Nkx6-2"    | 2.5609326   | 2.5268872   | 2.5871816   | 2.4949815   | 2.559993    | 2.5436144   | 2.5396736   | 2.5543923   |
| "Nle1"      | 2.8499212   | 2.6696224   | 2.4216647   | 2.5482545   | 2.9135845   | 3.2359076   | 2.5203638   | 2.676084    |
| "Nlk"       | 7.499676    | 7.8727568   | 8.2532143   | 7.9969165   | 7.750239    | 8.082461    | 8.2000195   | 8.0531233   |
| "Nln"       | 6.67756295  | 7.2812922   | 7.4129295   | 7.154361    | 7.72720985  | 7.89238775  | 7.20109295  | 7.4877242   |
| "Nlrp3"     | 2.99353     | 2.842777    | 2.9105034   | 2.802285    | 2.869064    | 2.861243    | 2.856754    | 2.854807    |
| "Nlrp4c"    | 2.6034732   | 2.6013572   | 2.5353868   | 2.5251522   | 2.6080863   | 2.5973175   | 2.5859287   | 2.6656227   |
| "Nlrp5"     | 2.74525     | 2.7152054   | 2.658836    | 2.6956527   | 2.7630277   | 2.7306263   | 2.6779976   | 2.7157142   |
| "Nlrp6"     | 7.89223     | 7.8826313   | 8.0749445   | 8.312275    | 8.217401    | 7.7522883   | 7.7556176   | 8.520715    |
| "Nlrx1"     | 5.2187467   | 5.5143027   | 5.826844    | 5.4837284   | 5.431581    | 5.437591    | 5.818801    | 5.507065    |
| "Nmb"       | 2.428541    | 2.3961258   | 2.3436708   | 2.3501167   | 2.4158792   | 2.4200206   | 2.4137316   | 2.4097633   |
| "Nmd3"      | 9.679505    | 8.960162    | 8.09475975  | 8.33718075  | 8.889858    | 8.9316225   | 8.66848325  | 8.7141685   |
| "Nme1"      | 10.2317195  | 10.351214   | 10.532094   | 10.360742   | 10.2998075  | 10.3456985  | 10.425842   | 10.4354075  |
| "Nme2"      | 13.2804165  | 13.288672   | 13.4859495  | 13.341633   | 13.296568   | 13.22783    | 13.44444    | 13.5870075  |
| "Nme6"      | 4.688696    | 5.885787    | 6.3772864   | 5.8344483   | 6.4485316   | 6.0753846   | 5.7009716   | 6.0946226   |
| "Nme7"      | 6.4979744   | 6.083692    | 6.5908504   | 6.4836345   | 6.8473477   | 5.752011    | 6.826951    | 6.8619614   |
| "Nmi"       | 8.478395    | 8.311379    | 9.670447    | 9.320142    | 8.41088     | 7.8627143   | 9.048216    | 8.72117     |
| "Nmnat1"    | 5.5510202   | 5.55226305  | 5.4766235   | 5.6300792   | 5.67990885  | 5.7346765   | 5.90044265  | 5.7309697   |
| "Nmnat3"    | 3.7698505   | 4.601841    | 4.9023957   | 4.643302    | 5.277601    | 4.8366523   | 6.1204634   | 5.358093    |
| "Nmnrk1"    | 4.2944588   | 5.21809245  | 5.120345    | 6.3112163   | 6.3373164   | 5.1112649   | 5.43471125  | 6.700811    |
| "Nmrt1"     | 6.2012285   | 6.3601653   | 6.217231    | 6.296939167 | 6.4498859   | 6.502224333 | 6.2487689   | 6.2671748   |
| "Nmrt2"     | 3.3507235   | 3.5446005   | 3.2174149   | 3.2419758   | 3.3344512   | 3.3271189   | 3.4524636   | 3.3753312   |
| "Nmru1"     | 2.2199388   | 2.1873097   | 2.1348739   | 2.159676    | 2.2236843   | 2.2283764   | 2.1965327   | 2.9342053   |
| "Nnat"      | 2.3730116   | 2.338283    | 2.2688997   | 2.3222625   | 2.360857    | 2.3651545   | 2.356699    | 2.3826969   |
| "Nmmt"      | 13.8687935  | 13.162909   | 12.405174   | 12.560816   | 12.947005   | 13.469738   | 11.513917   | 11.565167   |
| "Nnt"       | 8.3666132   | 8.6464565   | 8.453838    | 8.938493    | 8.90362975  | 9.1205225   | 9.3407925   | 8.7582505   |
| "Noa1"      | 5.682378    | 5.620005    | 5.3476458   | 5.994911    | 6.241159    | 6.613814    | 5.837544    | 5.6847544   |
| "Noc2l"     | 6.86485     | 6.6176524   | 6.3213606   | 6.2320576   | 6.2603936   | 6.7871885   | 6.1080837   | 6.195277    |
| "Noc3l"     | 3.6299012   | 3.2363846   | 3.0797043   | 3.2281728   | 3.8953726   | 3.2512612   | 3.2646675   | 3.2448056   |
| "Noc4l"     | 5.4986105   | 5.512101933 | 5.052533733 | 4.827637333 | 5.407033467 | 5.328661433 | 5.01981     | 5.3230072   |
| "Nodal"     | 2.7346215   | 2.8377914   | 2.7460403   | 2.7396245   | 2.831523    | 2.6950645   | 2.7405543   | 2.732041    |
| "Nol11"     | 4.823452067 | 4.876475767 | 4.845800167 | 4.718282167 | 4.736535333 | 4.948538233 | 4.9598932   | 4.7933525   |
| "Nol12"     | 7.471628    | 7.660677    | 7.2316213   | 6.9556365   | 7.1469164   | 7.1371436   | 7.0010905   | 6.940319    |
| "Nol3"      | 2.1312015   | 2.0949607   | 3.6410694   | 2.0832865   | 2.114068    | 2.1049519   | 2.1202257   | 2.1020832   |
| "Nol6"      | 2.418069    | 2.4385312   | 2.3844712   | 2.4292805   | 2.5217428   | 2.474114    | 2.3551855   | 2.6712797   |
| "Nol7"      | 6.943370967 | 7.095479667 | 6.7302004   | 6.870005567 | 7.033759533 | 7.047340667 | 7.1055909   | 6.894896333 |
| "Nolc1"     | 6.390542533 | 5.990180133 | 5.484146933 | 5.455476167 | 6.528168333 | 5.909701833 | 5.1571885   | 5.510151667 |
| "Nomo1"     | 4.580293    | 4.97883845  | 4.6209028   | 4.6436923   | 4.9419338   | 5.09093895  | 4.52503315  | 4.69553735  |
| "Nono"      | 7.5885133   | 7.6219736   | 7.539620933 | 7.7154116   | 7.786763333 | 7.894685233 | 7.745092467 | 7.707745633 |
| "Nop10"     | 10.6064605  | 10.781      | 10.601063   | 10.6271545  | 10.415307   | 10.655342   | 10.559315   | 10.606878   |
| "Nop14"     | 7.2914176   | 7.02213     | 6.1782794   | 6.5367794   | 6.7436914   | 6.972204    | 6.3519197   | 6.5831933   |
| "Nop16"     | 5.25753355  | 5.1291131   | 4.9150258   | 4.7159185   | 4.9913288   | 5.04103125  | 4.9417106   | 4.88130875  |
| "Nop2"      | 6.9936643   | 6.7017994   | 6.44013     | 6.0936313   | 7.0018897   | 7.5042152   | 6.391405    | 6.3754187   |

|           |             |             |             |             |             |             |             |             |
|-----------|-------------|-------------|-------------|-------------|-------------|-------------|-------------|-------------|
| "Nop56"   | 8.10060875  | 8.0514035   | 7.119669    | 6.76930675  | 7.381578    | 7.973911    | 6.846102    | 7.3220872   |
| "Nop58"   | 9.247365    | 8.165114    | 7.94011     | 7.1421256   | 8.249868    | 8.329537    | 7.486062    | 7.520485    |
| "Nos3"    | 5.752382    | 5.7187724   | 5.5820227   | 4.7850704   | 4.834882    | 4.757761    | 4.0575976   | 4.906555    |
| "Nosip"   | 5.4706802   | 5.93953935  | 5.63900585  | 5.9742137   | 5.6840992   | 5.5328637   | 5.6636933   | 5.62352325  |
| "Notch1"  | 6.81706955  | 6.3697778   | 6.5525673   | 6.3364057   | 6.3307514   | 6.48546625  | 6.3062218   | 6.16240405  |
| "Notch2"  | 8.435602    | 7.9398775   | 8.74683     | 8.610054    | 8.049142    | 8.397886    | 8.6695595   | 8.625951    |
| "Notch3"  | 3.010348    | 3.0123713   | 3.4262326   | 2.9091747   | 2.9993887   | 2.999303    | 2.9734077   | 3.0789394   |
| "Notch4"  | 3.3316545   | 3.158611    | 3.0741332   | 3.0464447   | 3.0926998   | 3.9182518   | 3.2177575   | 3.1031175   |
| "Notum"   | 2.498966    | 2.756143    | 2.7061927   | 3.7574813   | 4.217482    | 2.8342302   | 4.6676126   | 4.0858297   |
| "Nov"     | 2.8751438   | 2.864179    | 2.7439433   | 2.7915122   | 2.9149456   | 2.96738325  | 2.829479    | 2.90923595  |
| "Nova1"   | 2.420943    | 2.3954873   | 2.3129253   | 2.352491    | 2.4184778   | 2.4158912   | 2.403379    | 2.4085507   |
| "Nox4"    | 7.271067    | 9.7630525   | 3.87055075  | 7.6185047   | 6.9273703   | 7.761467    | 5.881675    | 9.105176    |
| "Npas2"   | 3.2543669   | 2.4095027   | 2.3418405   | 2.3751762   | 2.5154128   | 2.4386272   | 2.4314022   | 2.4429586   |
| "Npas3"   | 2.8658104   | 2.8810244   | 2.802466    | 2.8359003   | 2.8893998   | 2.887763    | 2.8304987   | 2.9824936   |
| "Npc1"    | 8.582452    | 9.684673    | 8.78697     | 9.632151    | 9.878598    | 9.856702    | 9.294304    | 9.792109    |
| "Npc2"    | 11.372487   | 10.5858595  | 11.46331725 | 11.163807   | 10.5296905  | 10.52192225 | 10.5535985  | 10.606676   |
| "Npd1"    | 2.8387966   | 2.836503    | 2.8253546   | 2.9616342   | 2.533541    | 2.8509617   | 3.1926482   | 2.8576677   |
| "Npepl1"  | 6.761121    | 7.1936684   | 7.0287685   | 7.052842    | 7.464201    | 7.24237     | 7.01464     | 7.083037    |
| "Npepps"  | 6.711719135 | 6.29086945  | 6.572282    | 6.64855425  | 6.7715516   | 7.181504    | 6.6422985   | 7.000332    |
| "Npff"    | 2.3189535   | 2.288164    | 2.2521458   | 2.2642822   | 2.3038533   | 2.2987907   | 2.3052325   | 2.472632    |
| "Npffr2"  | 2.5607646   | 2.5280402   | 2.5036547   | 2.5883622   | 2.5596452   | 2.548812    | 2.5489564   | 2.5459225   |
| "Nphp1"   | 4.065721567 | 4.225171233 | 4.331805467 | 4.1287402   | 4.3071629   | 4.2960728   | 4.252708833 | 4.122984433 |
| "Nphs1"   | 2.7783418   | 2.748456    | 2.6549711   | 2.7334187   | 2.7743926   | 2.7941225   | 2.7678714   | 2.8324604   |
| "Nphs2"   | 2.38873     | 2.3611884   | 2.287421    | 2.3272095   | 2.388653    | 2.3861885   | 2.3748412   | 2.416042    |
| "Npl"     | 2.8504627   | 2.6304393   | 3.7590008   | 2.8042061   | 2.8391535   | 2.8368475   | 2.8603497   | 2.667212    |
| "Nploc4"  | 7.4208884   | 7.7128673   | 7.024576    | 7.3035984   | 7.411668    | 8.021555    | 7.186782    | 7.3612633   |
| "Npm3"    | 5.7976103   | 6.328266    | 4.8115683   | 5.2859917   | 5.3215866   | 5.6031914   | 5.57891     | 5.1518207   |
| "Nprt"    | 3.910297967 | 2.738855133 | 2.654592    | 2.6316286   | 2.748063267 | 2.751627767 | 2.663003533 | 2.738212067 |
| "Nppa"    | 2.8933609   | 2.859667    | 2.8204463   | 2.8401222   | 2.8813803   | 2.8760939   | 2.8779004   | 2.8653178   |
| "Npr2"    | 5.577718    | 6.3486953   | 5.728323    | 6.545669    | 7.673909    | 6.516697    | 7.1074195   | 7.1532636   |
| "Npr3"    | 3.044669833 | 2.6641252   | 2.621705067 | 2.6315849   | 2.687282167 | 2.685645733 | 2.8707071   | 2.6782415   |
| "Npri2"   | 4.9036427   | 4.8607383   | 5.247801    | 5.110022    | 5.1805716   | 5.567497    | 5.59624     | 5.353813    |
| "Npri3"   | 4.0926137   | 5.0276117   | 3.9943302   | 4.1114807   | 4.125223    | 4.1071377   | 4.1299486   | 4.088384    |
| "Nptn"    | 9.570746    | 9.50192     | 9.697056    | 9.898073    | 9.74409     | 9.895056    | 10.0880165  | 9.867497    |
| "Nptx1"   | 2.3520443   | 2.6077445   | 2.2682695   | 2.2586513   | 2.3802936   | 2.3487923   | 2.3419123   | 2.3805597   |
| "Nptx2"   | 2.3931642   | 2.359622    | 2.3037755   | 2.3238273   | 2.3820355   | 2.3773754   | 2.3680341   | 2.364611    |
| "Npvf"    | 2.8083348   | 2.8094544   | 2.7723174   | 2.7932541   | 2.8959305   | 2.8251276   | 2.8157105   | 2.8246052   |
| "Npy1r"   | 2.4452112   | 2.423218    | 2.3392313   | 2.3832066   | 2.4470842   | 2.4634154   | 2.4289448   | 2.441323    |
| "Npy2r"   | 2.9370453   | 2.9128835   | 2.775786    | 2.840012    | 2.9700513   | 2.970586    | 2.8972974   | 2.9782832   |
| "Npy5r"   | 2.4561906   | 2.4311552   | 2.3524427   | 2.4023092   | 2.4541063   | 2.4503865   | 2.440536    | 2.4457984   |
| "Nqo1"    | 5.353037    | 6.357605    | 8.061686    | 7.0331526   | 5.040801    | 3.7531488   | 4.9420605   | 4.1614676   |
| "Nqo2"    | 6.974154    | 6.773113    | 8.436242    | 8.881063    | 7.688178    | 7.187609    | 8.7544365   | 8.681238    |
| "Nr0b1"   | 2.6006992   | 2.5693777   | 2.5378141   | 2.533154    | 2.6017945   | 2.59079     | 2.588817    | 2.580086    |
| "Nr0b2"   | 7.1219544   | 6.512879    | 8.300318    | 6.4196925   | 7.727577    | 7.8320055   | 9.842419    | 6.3492155   |
| "Nr1d1"   | 2.6042964   | 2.568622    | 2.560148    | 2.556508    | 2.5883582   | 2.5730183   | 3.8161216   | 2.6632967   |
| "Nr1d2"   | 6.47864595  | 6.9213928   | 6.7622708   | 7.153126    | 7.0473854   | 7.10476635  | 6.9300395   | 7.2660726   |
| "Nr1h2"   | 4.6776724   | 4.5115347   | 4.522032    | 4.4565744   | 4.3070803   | 4.2947555   | 4.4319334   | 4.3045955   |
| "Nr1h3"   | 6.861743    | 6.7093406   | 7.20809     | 7.0616717   | 7.208226    | 7.2229204   | 6.819927    | 7.110009    |
| "Nr1h4"   | 9.063098    | 10.802346   | 9.698818    | 10.256495   | 10.986289   | 10.822263   | 10.007178   | 10.623046   |
| "Nr1i2"   | 6.4371245   | 6.77626615  | 6.0041225   | 5.96841955  | 7.1575065   | 7.234832    | 6.89721205  | 6.67169835  |
| "Nr1i3"   | 6.72894     | 8.466463    | 7.2918725   | 8.3248415   | 8.310668    | 7.2392917   | 7.870925    | 8.443289    |
| "Nr2c1"   | 3.7218901   | 4.0562642   | 3.8280048   | 3.9916427   | 3.90086235  | 4.24820635  | 3.92364395  | 4.3608055   |
| "Nr2c2"   | 4.3709613   | 4.11835325  | 4.14216815  | 4.1620205   | 4.1902752   | 4.8168013   | 4.2657165   | 4.6436486   |
| "Nr2c2ap" | 5.073989    | 4.3924594   | 4.139977    | 3.9468257   | 4.4734807   | 4.5700493   | 4.318889    | 3.917627    |
| "Nr2f1"   | 4.4062963   | 4.4300785   | 4.209671    | 4.5515814   | 4.4711957   | 4.526291    | 4.4982657   | 4.536188    |
| "Nr2f2"   | 5.313624333 | 6.1032805   | 5.9897658   | 6.693969567 | 6.6305728   | 6.331138467 | 6.805277367 | 6.791965333 |
| "Nr2f6"   | 8.111211    | 8.19095125  | 8.3421105   | 8.0572505   | 8.467083    | 8.785259    | 8.816564    | 8.5916675   |
| "Nr3c1"   | 6.5288723   | 6.582140667 | 6.720025167 | 6.804136667 | 6.702622667 | 6.754297667 | 6.943175367 | 7.017198667 |
| "Nr4a1"   | 10.433553   | 5.219634    | 5.5306735   | 5.2022896   | 5.078255    | 5.4527397   | 5.2362957   | 4.8946567   |
| "Nr4a2"   | 4.54423915  | 2.69898115  | 2.63546205  | 2.65397655  | 2.72282395  | 2.70143095  | 2.686826    | 2.69374295  |
| "Nr5a1"   | 2.668346    | 2.559349    | 2.4574146   | 2.5480864   | 2.6019409   | 2.588936    | 2.5620437   | 2.5664773   |
| "Nr5a2"   | 6.149918067 | 5.849245667 | 6.168449733 | 6.365912467 | 5.802911167 | 5.989465733 | 6.217156667 | 6.106859567 |
| "Nr6a1"   | 2.5121279   | 2.4723234   | 2.4550579   | 2.4189944   | 2.507229    | 2.4932115   | 2.4794137   | 2.4683316   |
| "Nrap"    | 2.600291    | 2.5712836   | 2.5161061   | 2.5414808   | 2.5012774   | 2.5872622   | 2.5907886   | 2.5767133   |
| "Nrapr"   | 2.38128545  | 2.35513055  | 2.6695846   | 2.3245793   | 2.3648453   | 2.4445112   | 2.3767383   | 2.36979315  |
| "Nras"    | 6.681937633 | 6.235699667 | 7.072178    | 6.7426137   | 6.4761386   | 6.3569076   | 6.563655067 | 6.742515033 |
| "Nrbf2"   | 10.759716   | 9.966834    | 9.317757    | 9.603552    | 10.076967   | 10.557022   | 9.7978735   | 9.530159    |
| "Nrbbp1"  | 5.431678    | 5.3621297   | 4.940899    | 5.155241    | 5.1967154   | 5.1981134   | 5.3157043   | 5.2612896   |
| "Nrbbp2"  | 8.630091    | 8.611536    | 7.0179048   | 7.102572    | 7.6174636   | 8.566592    | 6.2097726   | 7.2332764   |
| "Nrcam"   | 2.390345    | 2.357695    | 2.293531    | 2.3321402   | 2.3786345   | 2.3778987   | 2.379343    | 2.3690248   |
| "Nrd1"    | 5.19578905  | 5.25503835  | 5.2205405   | 5.2945666   | 5.38352915  | 5.3460715   | 5.41497985  | 5.34689     |
| "Nrf1"    | 3.429601033 | 3.4746645   | 3.3453715   | 3.1104896   | 3.3738231   | 3.8236717   | 3.343917333 | 3.823620567 |
| "Nrg3"    | 2.4354736   | 2.40664065  | 2.3304453   | 2.3742763   | 2.47689795  | 2.4293847   | 2.41888865  | 2.4198548   |
| "Nrg4"    | 7.593114    | 7.63361     | 5.514389    | 5.821868    | 6.881159    | 7.2291894   | 3.91706     | 5.455987    |
| "Nrip1"   | 7.9113475   | 6.0556795   | 6.0213055   | 6.1612613   | 6.4904468   | 6.6259795   | 6.12850215  | 5.9772751   |
| "Nrip2"   | 2.448864    | 2.421901    | 2.3429484   | 2.3964896   | 2.4491599   | 2.4413884   | 2.4304774   | 2.434716    |
| "Nrip3"   | 2.5796714   | 2.55022955  | 2.4439034   | 2.4988716   | 2.58696815  | 2.5996311   | 2.55628765  | 2.581748    |
| "Nrk"     | 2.492795    | 2.4701295   | 2.38593015  | 2.4341208   | 2.53565525  | 2.49281765  | 2.4830339   | 2.48881695  |
| "Nrp1"    | 9.158232    | 7.6455842   | 9.030724333 | 8.769518167 | 8.636925133 | 8.3738215   | 9.64654     | 9.2818095   |
| "Nrp2"    | 4.339359    | 4.833373    | 5.337613    | 5.525721    | 5.572818    | 5.2893705   | 5.516942    | 4.782859    |
| "Nrsn1"   | 2.707439    | 2.6770017   | 2.5619066   | 2.613032    | 2.7173333   | 2.7031188   | 2.6725774   | 2.7129815   |

|            |             |             |             |             |             |             |             |             |
|------------|-------------|-------------|-------------|-------------|-------------|-------------|-------------|-------------|
| "Nsa2"     | 2.4010258   | 2.3757555   | 2.3052516   | 2.3422594   | 2.3967266   | 2.3911424   | 2.3993044   | 2.3857503   |
| "Nsdl"     | 10.265703   | 10.096594   | 10.829735   | 10.301117   | 7.3371997   | 5.599473    | 8.749759    | 10.318479   |
| "Nsf"      | 6.54434515  | 6.5441873   | 6.58825135  | 6.384721    | 6.3017123   | 6.46269035  | 6.0316518   | 6.1592178   |
| "Nsfl1c"   | 8.85915     | 9.309278    | 9.299531    | 9.05604     | 9.162762    | 9.349975    | 9.265357    | 9.198039    |
| "Nsg1"     | 2.58941615  | 2.5652007   | 2.50674395  | 2.54300545  | 2.5920147   | 2.70388725  | 2.5648046   | 2.58767115  |
| "Nsmaf"    | 5.36104     | 5.382883    | 5.2403226   | 5.30928     | 5.3456397   | 5.481385    | 5.7762074   | 5.6073227   |
| "Nsmce1"   | 7.14167     | 7.8356108   | 7.95400125  | 7.7603405   | 7.1344932   | 7.2909342   | 7.74088585  | 7.778437    |
| "Nsmce2"   | 6.8038993   | 7.3395624   | 6.660407    | 6.36882     | 6.863512    | 6.887138    | 6.638714    | 6.872684    |
| "Nsmce4a"  | 6.1588141   | 6.3177815   | 6.0561216   | 6.248009    | 6.2340527   | 6.34208475  | 6.3013506   | 6.3654937   |
| "Nsun2"    | 9.929417    | 10.294145   | 9.740211    | 9.952348    | 10.412026   | 10.488849   | 9.570404    | 10.310603   |
| "Nsun4"    | 7.1944399   | 7.1121099   | 6.98317     | 7.035777    | 6.99374765  | 6.9696027   | 6.9793573   | 7.5336852   |
| "Nsun5"    | 2.7782688   | 2.748573    | 2.642244    | 2.6956265   | 2.9492865   | 2.8361282   | 2.7462924   | 2.743391    |
| "Nsun6"    | 2.93396915  | 2.903631    | 2.88004545  | 2.8843304   | 2.93257985  | 2.91992525  | 2.932426    | 2.9145017   |
| "Nt5c"     | 7.997263    | 7.6222024   | 8.204525    | 7.840135    | 7.6043754   | 7.7714934   | 7.850288    | 7.8285565   |
| "Nt5c2"    | 4.361047033 | 4.370798333 | 4.180246333 | 3.600758167 | 4.2290785   | 3.9761129   | 4.1010822   | 3.869886467 |
| "Nt5c3"    | 8.71436     | 8.673998    | 9.139323    | 9.122802    | 8.34224     | 8.699183    | 8.9339285   | 9.232108    |
| "Nt5c3l"   | 2.6629715   | 2.6142931   | 3.2732508   | 2.6697768   | 2.70953925  | 2.6483535   | 2.8681613   | 2.7432663   |
| "Nt5dc2"   | 2.719426    | 2.4606538   | 2.6611826   | 2.4103887   | 2.7261577   | 2.802034    | 2.8137085   | 2.6887114   |
| "Nt5dc3"   | 4.406513    | 3.8600435   | 3.7473526   | 3.8455775   | 3.7769997   | 4.3063974   | 3.780671    | 3.7648642   |
| "Nt5e"     | 3.843643    | 2.3853602   | 4.0548964   | 2.5087354   | 2.7677433   | 2.667888    | 3.8895135   | 2.1599295   |
| "Nt5m"     | 6.317766    | 6.7045116   | 6.343374    | 6.536674    | 6.2607145   | 6.602359    | 6.3273883   | 6.2194686   |
| "Ntan1"    | 6.1755075   | 6.343643    | 7.0333076   | 6.8702803   | 6.499623    | 6.0622363   | 7.2172327   | 6.4523253   |
| "Ntf3"     | 4.404464    | 3.0888307   | 3.8552628   | 2.711282    | 2.8844826   | 2.9556506   | 2.7515168   | 2.8889105   |
| "Nthl1"    | 3.4882853   | 3.3986983   | 3.6287735   | 3.609217    | 3.232364    | 3.5146673   | 3.5179002   | 3.2261107   |
| "Ntnm"     | 3.4371302   | 3.2169795   | 3.0525175   | 3.0327737   | 3.24711465  | 3.24476565  | 3.18725825  | 3.3337066   |
| "Ntn1"     | 4.988896    | 4.7659163   | 5.4197445   | 4.9565883   | 5.027193    | 4.5881515   | 5.557891    | 4.8980203   |
| "Ntn4"     | 2.4883058   | 2.4551647   | 2.3932211   | 2.4381604   | 2.4762173   | 2.7295291   | 2.4783158   | 2.4592395   |
| "Ntn6"     | 2.45923675  | 2.61416145  | 2.3642107   | 2.4041245   | 2.4586613   | 2.45054975  | 2.44850395  | 2.45480395  |
| "Ntpcr"    | 7.068079    | 5.05976     | 6.9749327   | 6.169013    | 5.191514    | 5.3432875   | 6.305423    | 5.2774596   |
| "Ntrk2"    | 2.5227454   | 2.4899235   | 2.238579    | 2.4669414   | 2.6492517   | 2.736306    | 2.5721374   | 2.4949238   |
| "Ntrk3"    | 2.4978502   | 2.552679    | 2.391814967 | 2.446356133 | 2.5192623   | 2.515296167 | 2.467994467 | 2.498910233 |
| "Nub1"     | 5.933674333 | 5.914596367 | 5.6870769   | 5.693651667 | 5.471400233 | 5.552949267 | 5.6069211   | 5.583506333 |
| "Nubp1"    | 5.318487467 | 6.3098151   | 5.739955967 | 5.498647767 | 5.873816467 | 5.728220833 | 5.4851365   | 5.7168883   |
| "Nubp2"    | 6.173963    | 6.4892383   | 6.1106324   | 6.0763164   | 6.472893    | 6.2029524   | 5.9940324   | 6.056707    |
| "Nucb1"    | 8.278911    | 8.371713    | 8.32367     | 8.857271    | 8.817416    | 8.442332    | 8.80162     | 8.804483    |
| "Nucb2"    | 6.063262    | 5.343297    | 6.0754414   | 5.8669386   | 5.9042544   | 5.91596     | 5.5273085   | 6.4565926   |
| "Nucks1"   | 7.742451575 | 8.4585815   | 7.259604325 | 7.196164025 | 7.6691294   | 8.1360158   | 7.303947975 | 7.176317125 |
| "Nudc"     | 9.2145895   | 9.2544405   | 8.7801585   | 8.9021865   | 8.95302675  | 9.306139    | 8.832217    | 8.9377125   |
| "Nudcd1"   | 3.08500445  | 3.5145085   | 2.7769606   | 2.95019375  | 3.3837798   | 3.30497615  | 2.98369895  | 3.09965585  |
| "Nudcd2"   | 9.343245    | 9.765034    | 9.415876    | 9.3222185   | 9.961557    | 9.673226    | 9.485008    | 9.4137965   |
| "Nudcd3"   | 5.7616696   | 6.4096255   | 7.052034    | 6.9167967   | 6.582769    | 6.144894    | 6.871231    | 6.666516    |
| "Nudt1"    | 6.571331    | 7.345463    | 7.7913284   | 7.5567317   | 7.1347113   | 7.161066    | 7.796765    | 7.3994536   |
| "Nudt13"   | 5.611883    | 5.436821    | 6.6581507   | 7.1392546   | 6.2583356   | 6.32282     | 7.500598    | 6.943619    |
| "Nudt14"   | 5.605668    | 6.420789    | 7.0321994   | 6.17511     | 6.304269    | 5.4027166   | 6.0852194   | 6.180303    |
| "Nudt16"   | 6.9771633   | 6.9982233   | 6.986703    | 7.3446994   | 6.952047    | 6.8616433   | 7.3020296   | 7.2112503   |
| "Nudt16l1" | 5.7841498   | 6.7879285   | 7.7584695   | 7.4664142   | 7.19792685  | 6.6407775   | 7.4798145   | 7.31034275  |
| "Nudt19"   | 8.445659    | 8.4373985   | 8.5741205   | 8.19473815  | 8.53956925  | 8.2798155   | 8.58381835  | 8.73392325  |
| "Nudt2"    | 8.074437    | 8.450719    | 9.510285    | 9.361429    | 7.7862077   | 7.280989    | 8.892751    | 9.080401    |
| "Nudt21"   | 8.9992695   | 9.378458    | 9.584003    | 9.235776    | 8.833756    | 9.108408    | 9.041361    | 9.20199     |
| "Nudt22"   | 3.14857255  | 3.52816405  | 3.7802105   | 3.62549105  | 3.5875053   | 3.62028825  | 3.6009809   | 3.6896936   |
| "Nudt3"    | 6.517377    | 7.213846    | 6.501931    | 7.0251474   | 6.7978845   | 6.8473372   | 6.596484    | 6.7549405   |
| "Nudt4"    | 11.201842   | 10.57886175 | 10.138624   | 10.307649   | 10.51384325 | 10.361097   | 10.280675   | 10.140803   |
| "Nudt5"    | 5.825103    | 5.464673    | 6.5737233   | 5.4857845   | 5.846834    | 6.0347033   | 6.4115653   | 6.092896    |
| "Nudt6"    | 5.7526517   | 5.8677626   | 5.7631316   | 5.391984    | 5.7184973   | 5.9980917   | 5.67787     | 5.8428693   |
| "Nudt7"    | 10.835755   | 12.566617   | 11.783903   | 12.480071   | 11.812832   | 12.295398   | 12.470414   | 13.504847   |
| "Nudt8"    | 6.517645    | 7.335881    | 7.006221    | 6.9664893   | 7.2755527   | 7.031043    | 6.9095902   | 7.0248227   |
| "Nudt9"    | 8.492745    | 8.813288    | 9.095865    | 9.002405    | 8.80297     | 8.403204    | 8.873104    | 8.885091    |
| "Nuf2"     | 2.5595682   | 2.5366557   | 2.5172358   | 2.5275855   | 2.5532262   | 2.5511374   | 2.5571601   | 2.5460286   |
| "Nufip1"   | 7.5512223   | 7.0938935   | 6.1738605   | 6.578513    | 6.295834    | 6.3905587   | 6.321835    | 6.426852    |
| "Numa1"    | 5.7030988   | 5.967146    | 5.75639745  | 6.0718837   | 6.17551515  | 6.30723725  | 6.082933    | 6.1558445   |
| "Numb"     | 5.5606055   | 5.9506268   | 5.74910045  | 5.8690469   | 5.92617135  | 5.9975475   | 5.9744954   | 5.980424    |
| "Numbl"    | 2.3313215   | 2.2949536   | 2.225791    | 2.2274349   | 2.3316798   | 2.3032863   | 2.3158543   | 2.5080307   |
| "Nup107"   | 5.3134685   | 5.6277847   | 5.4505534   | 5.333374    | 5.3294034   | 5.3948755   | 5.4075336   | 5.5141916   |
| "Nup133"   | 4.34277235  | 4.373233175 | 4.334366525 | 4.4705973   | 4.294829475 | 4.464958975 | 4.467831125 | 4.61153495  |
| "Nup153"   | 8.782742    | 8.487048    | 8.411999    | 8.242254    | 8.582402    | 8.761606    | 8.543262    | 8.304496    |
| "Nup155"   | 6.1427307   | 6.0284178   | 6.012013    | 6.04646535  | 6.0594845   | 6.175874    | 6.1386089   | 6.55487485  |
| "Nup160"   | 5.852354    | 4.6982536   | 5.57432     | 5.2503138   | 5.2128186   | 5.4045286   | 5.7885375   | 5.431897    |
| "Nup188"   | 3.660256    | 3.6160858   | 3.6068459   | 3.7142634   | 3.6371796   | 3.8691874   | 3.6276844   | 3.6251202   |
| "Nup210"   | 5.7582283   | 6.468682    | 7.0730734   | 7.364401    | 6.6864834   | 6.262302    | 7.1030293   | 7.4586377   |
| "Nup35"    | 3.0413542   | 4.027982    | 4.3502493   | 4.1097746   | 4.394998    | 4.7371945   | 4.169136    | 4.59328     |
| "Nup43"    | 2.60829095  | 2.8302351   | 2.64951965  | 2.6863315   | 2.56372915  | 2.70975195  | 2.8212162   | 2.7787237   |
| "Nup50"    | 5.8161006   | 5.786044967 | 5.5571329   | 5.8863985   | 5.785623333 | 5.79143     | 5.604184467 | 5.956296133 |
| "Nup54"    | 8.4811485   | 8.1080665   | 7.93890335  | 8.0678465   | 8.34267115  | 8.357043    | 8.14122315  | 8.5894055   |
| "Nup62"    | 6.677391033 | 6.535853933 | 5.618556067 | 5.204375267 | 5.907806167 | 4.945125867 | 5.504137867 | 5.181557333 |
| "Nup85"    | 6.1276665   | 6.00706525  | 6.32885825  | 6.175803    | 6.13725435  | 6.5704627   | 6.390817    | 6.27550065  |
| "Nup88"    | 8.54163     | 8.558241    | 8.465826    | 8.510408    | 8.393424    | 8.407202    | 8.3459015   | 8.654578    |
| "Nup93"    | 5.789107    | 5.545435    | 5.821566    | 5.1281705   | 5.248888    | 5.648307    | 5.5931625   | 5.2575564   |
| "Nup98"    | 5.8679504   | 4.627091    | 4.287813    | 4.168401    | 3.5803046   | 4.3498      | 4.700116    | 3.7071416   |
| "Nupl1"    | 5.819127    | 5.5157202   | 5.444208275 | 5.0382153   | 5.499411025 | 5.418868525 | 5.474179325 | 5.483617275 |
| "Nupr1"    | 4.2561873   | 3.67802405  | 4.22589255  | 3.7717292   | 3.705326    | 4.95622985  | 3.65799405  | 3.6999665   |
| "Nus1"     | 6.824291733 | 6.977381667 | 6.360413967 | 6.373448133 | 6.692768467 | 6.5392989   | 6.7080209   | 6.2798152   |

|            |             |             |             |             |             |             |             |             |
|------------|-------------|-------------|-------------|-------------|-------------|-------------|-------------|-------------|
| "Nusap1"   | 2.5502453   | 2.5173687   | 2.71229985  | 2.4826105   | 2.5596652   | 2.5382742   | 2.5772424   | 2.5561769   |
| "Nvl"      | 3.637539    | 4.11088405  | 4.12317935  | 4.09410795  | 4.1813729   | 4.0689705   | 4.284782    | 4.11438195  |
| "Nxf1"     | 8.488955    | 8.019766    | 7.8520594   | 7.803838    | 8.14683     | 8.567839    | 7.741136    | 8.293652    |
| "Nxf7"     | 2.4160414   | 2.3900993   | 2.3105032   | 2.3666928   | 2.4280727   | 2.4047263   | 2.4059703   | 2.4222538   |
| "Nxn"      | 2.8662093   | 2.8582375   | 2.995788    | 2.762734    | 2.9082067   | 2.8865693   | 2.8531878   | 2.868776    |
| "Nxn12"    | 2.4437494   | 2.4242997   | 2.381018    | 2.3744009   | 2.4408038   | 2.4339478   | 2.4325519   | 2.4297714   |
| "Nxph3"    | 2.33047     | 2.2904592   | 2.2686415   | 2.2815008   | 2.2942288   | 2.4051108   | 2.3173666   | 2.3012052   |
| "Nxt1"     | 6.9754257   | 6.5990176   | 7.0059347   | 6.7156334   | 6.754524    | 7.407234    | 6.634902    | 7.178718    |
| "Oaf"      | 10.828961   | 9.861414    | 10.297758   | 10.98705    | 10.272444   | 10.629255   | 10.404173   | 10.858075   |
| "Oas1a"    | 8.401374    | 6.0362105   | 9.537365    | 8.636739    | 6.568676    | 6.5892587   | 7.6454043   | 7.3912206   |
| "Oas1c"    | 2.8276744   | 2.6326065   | 3.5456855   | 3.3143897   | 2.6452787   | 2.6411686   | 2.6902897   | 2.634278    |
| "Oas2"     | 5.4847145   | 4.6197147   | 6.302429    | 5.353959    | 4.398611    | 4.9085703   | 5.0466394   | 4.8788486   |
| "Oas3"     | 2.3583806   | 2.325824    | 2.3069034   | 2.3960402   | 2.3530173   | 2.3434176   | 2.360144    | 2.3399413   |
| "Oas11"    | 8.458529    | 7.46306     | 9.954023    | 8.930613    | 5.8802996   | 5.415156    | 6.3588967   | 5.979758    |
| "Oas12"    | 4.1710825   | 2.5262144   | 6.108594    | 5.495302    | 3.1201878   | 3.1355333   | 4.787118    | 3.4564412   |
| "Oat"      | 13.238443   | 12.920737   | 11.823582   | 13.288786   | 13.277912   | 13.136679   | 13.577507   | 12.731645   |
| "Oaz1"     | 12.1598395  | 12.371137   | 12.101782   | 12.25935475 | 12.30265275 | 12.2747465  | 12.271548   | 12.373996   |
| "Oaz2"     | 6.35114735  | 6.3367002   | 6.54232265  | 6.8296118   | 6.3868645   | 6.18331285  | 6.4376317   | 6.60621855  |
| "Obfc2a"   | 5.631500967 | 6.457015867 | 6.493368233 | 5.901393167 | 6.1310091   | 6.1099139   | 5.6334455   | 5.971869333 |
| "Obfc2b"   | 2.7875075   | 3.726193    | 2.925266    | 3.0630474   | 2.9217172   | 2.9537249   | 3.0639243   | 2.947468    |
| "Obox3"    | 2.891282    | 2.85756     | 2.8294144   | 2.8403068   | 2.9071383   | 2.8706243   | 2.8809965   | 2.9494157   |
| "Obp1a"    | 2.71154     | 2.6810932   | 2.57566     | 2.6313474   | 2.712958    | 2.7307556   | 2.6932442   | 2.7292223   |
| "Oca2"     | 2.422409    | 2.3922412   | 2.336634    | 2.363172    | 2.4190028   | 2.412486    | 2.4089265   | 2.4138324   |
| "Ocel1"    | 4.1475782   | 4.5547986   | 4.306186    | 4.4166      | 4.3432903   | 4.4937334   | 4.3649635   | 4.336291    |
| "Ociad1"   | 6.537094    | 6.6045837   | 6.5763164   | 6.6030937   | 6.650542    | 6.7798237   | 6.6694178   | 6.6306678   |
| "Ocln"     | 6.29423     | 6.0776043   | 6.72263     | 6.678602    | 5.4824905   | 6.353832    | 7.1019773   | 7.0992317   |
| "Ocstamp"  | 2.4165795   | 2.6766129   | 2.1517236   | 2.1606247   | 2.2074397   | 2.202222    | 2.2088828   | 2.180398    |
| "Odc1"     | 8.768101667 | 8.862015333 | 8.214465533 | 7.718210333 | 8.456510433 | 8.3780835   | 8.242772333 | 7.970299    |
| "Odf2"     | 4.1683712   | 4.106033667 | 3.7969699   | 4.028392533 | 4.0035699   | 4.1441188   | 3.936169967 | 4.1099181   |
| "Odf2l"    | 3.13579725  | 3.22917405  | 3.05173055  | 3.1847622   | 3.26121415  | 3.2039878   | 3.2474119   | 3.300635    |
| "Odz2"     | 2.5838861   | 2.5633264   | 2.5203419   | 2.5487561   | 2.5897095   | 2.588323    | 2.5651124   | 2.5732574   |
| "Odz3"     | 4.3049216   | 5.714728    | 5.360126    | 5.8614116   | 7.1098185   | 4.955291    | 7.6584535   | 6.200494    |
| "Odz4"     | 2.3891544   | 2.3681746   | 2.319363    | 2.3583302   | 2.3856268   | 2.3800917   | 2.3766332   | 2.3735127   |
| "Ofa"      | 2.5990198   | 2.572075    | 2.4801278   | 2.5232434   | 2.5943952   | 2.5963888   | 2.578849    | 2.6152208   |
| "Ofd1"     | 5.084578    | 5.0827565   | 4.4410615   | 4.5401063   | 4.7205677   | 4.960852    | 4.746256    | 4.716764    |
| "Ogdh"     | 8.067758    | 8.0983305   | 7.7238207   | 7.9422274   | 8.251044    | 8.27251     | 8.0387      | 8.251791    |
| "Ogfo2"    | 5.4234633   | 5.572446    | 5.127518    | 5.507548    | 5.301297    | 5.4490237   | 5.3785334   | 5.384192    |
| "Ogfr"     | 8.248531    | 8.09082     | 8.510302    | 8.187329    | 8.144809    | 8.236056    | 7.873647    | 7.936125    |
| "Ogfr11"   | 6.493557633 | 6.620675767 | 6.487973733 | 5.997803    | 5.328143667 | 6.002819033 | 5.602746767 | 5.579137367 |
| "Ogg1"     | 2.5010424   | 2.4823563   | 2.4347496   | 2.4334624   | 2.4868724   | 2.4900575   | 2.4902565   | 2.4719572   |
| "Ogn"      | 4.0245202   | 3.855443    | 3.86067725  | 4.08749985  | 4.67897935  | 3.77539145  | 4.1587063   | 3.9339082   |
| "Ogt"      | 5.12220592  | 4.94506724  | 5.69330512  | 5.544639    | 5.44479404  | 5.60722668  | 5.54709514  | 5.79360772  |
| "Oit3"     | 7.594112    | 6.5241466   | 7.2676134   | 7.0422554   | 7.2018485   | 7.5662584   | 7.653548    | 6.888624    |
| "Ola1"     | 5.9691071   | 6.5297379   | 6.2996728   | 6.262934675 | 6.21420455  | 6.17445225  | 6.38308915  | 6.5017866   |
| "Olah"     | 2.928717    | 2.9236961   | 2.8328665   | 2.7896471   | 3.01187755  | 2.9337153   | 2.8214325   | 2.9736888   |
| "Olfm1"    | 3.576347267 | 3.504452967 | 3.3923389   | 3.3668261   | 3.489395    | 3.472766267 | 3.4668222   | 3.5042105   |
| "Olfm3"    | 3.305295567 | 3.708781733 | 3.604124633 | 4.068274267 | 3.796848333 | 3.549832633 | 3.707304867 | 4.5569859   |
| "Olfm13"   | 4.9072638   | 4.8728466   | 5.358077    | 4.858661    | 5.1888876   | 4.795001    | 4.7966757   | 4.880245    |
| "Olfr1507" | 2.7232978   | 2.7033882   | 2.6724968   | 2.6817095   | 2.7235322   | 2.7134037   | 2.7044497   | 2.7089953   |
| "Olfr1508" | 2.5323625   | 2.510744    | 2.4192352   | 2.5032327   | 2.5329351   | 2.549921    | 2.5175872   | 2.5259137   |
| "Olfr156"  | 2.6092064   | 2.5796437   | 2.5351562   | 2.5780814   | 2.6107998   | 2.6011524   | 2.5884366   | 2.5991535   |
| "Olfr157"  | 2.3866646   | 2.3765516   | 2.3065152   | 2.33737     | 2.383234    | 2.3832946   | 2.3929884   | 2.3762836   |
| "Olfr159"  | 2.620818    | 2.5932317   | 2.5132189   | 2.5629334   | 2.617027    | 2.6384697   | 2.608132    | 2.6003296   |
| "Olfr66"   | 2.3736339   | 2.3454626   | 2.3001919   | 2.3251917   | 2.3680155   | 2.3624442   | 2.3621893   | 2.35708     |
| "Olfr78"   | 3.308688    | 3.2808459   | 3.1762336   | 3.1372418   | 3.3249853   | 3.3460858   | 3.2835917   | 3.3392475   |
| "Olig1"    | 7.0052824   | 2.6326106   | 2.135891    | 2.3344707   | 2.308003    | 2.0590477   | 2.3649168   | 2.6554441   |
| "Olig2"    | 2.8298254   | 2.8404555   | 2.6927228   | 2.7294974   | 2.8943477   | 2.8260002   | 2.7811277   | 2.8243713   |
| "Olri1"    | 2.65945     | 2.640852    | 2.5014386   | 2.5738947   | 2.6605482   | 2.6600285   | 2.621959    | 2.6600027   |
| "Oma1"     | 7.699393    | 7.7739263   | 8.474028    | 8.171926    | 7.812177    | 7.63038     | 8.367069    | 8.082984    |
| "Omd"      | 3.563037    | 6.4858446   | 3.0802968   | 4.0572906   | 3.3411372   | 4.208416    | 3.3841517   | 4.56182     |
| "Omt2a"    | 2.7152097   | 2.6898077   | 2.5842195   | 2.6260374   | 2.7538753   | 2.727628    | 2.71329     | 2.738288    |
| "Omt2b"    | 2.6439152   | 2.6260962   | 2.5365417   | 2.5730977   | 2.6660883   | 2.6466568   | 2.630169    | 2.6829543   |
| "Onecut1"  | 4.123193    | 8.150665    | 5.642216    | 5.9938655   | 8.4897235   | 6.52572675  | 4.217505    | 8.5731835   |
| "Opa1"     | 5.8666615   | 5.9690175   | 5.7756132   | 5.927764    | 6.08064315  | 6.066153    | 6.1481526   | 6.2015184   |
| "Opa3"     | 6.8119782   | 6.8884349   | 6.8875663   | 6.715256    | 6.98555635  | 6.9275725   | 6.7648403   | 6.797654    |
| "Ophn1"    | 2.4832157   | 2.45418685  | 2.3806955   | 2.4289283   | 2.4787245   | 2.49674105  | 2.4793615   | 2.5669117   |
| "Oplah"    | 8.973281    | 9.928618    | 8.570243    | 9.024357    | 9.638369    | 10.189388   | 8.93045     | 9.064064    |
| "Opn3"     | 4.3148394   | 4.2704725   | 4.226305    | 4.2667356   | 4.4728565   | 4.289978    | 4.3044624   | 4.2851124   |
| "Oprd1"    | 2.5847304   | 2.5555005   | 2.482304    | 2.4869971   | 2.6653736   | 2.5723734   | 2.5586748   | 2.582203    |
| "Oprl1"    | 3.0874474   | 3.1018147   | 2.9350245   | 3.07234     | 3.1590166   | 3.1876915   | 3.1044703   | 3.1469371   |
| "Oprrm1"   | 2.6569877   | 2.623647    | 2.5177307   | 2.6074169   | 2.6434538   | 2.634263    | 2.6207166   | 2.6275575   |
| "Orai1"    | 3.6871984   | 3.39919865  | 4.07098585  | 3.5072454   | 3.59510975  | 4.1625303   | 3.67412485  | 3.7837307   |
| "Oraov1"   | 4.360312    | 5.9407616   | 5.929576    | 5.8216953   | 6.6315074   | 6.0961766   | 5.9372025   | 6.54551     |
| "Orc2"     | 4.262721033 | 4.225326433 | 3.473773233 | 3.8287787   | 3.734130167 | 3.736159    | 3.635255667 | 3.618360233 |
| "Orc3"     | 4.5358146   | 4.871299833 | 4.751560633 | 4.765948033 | 4.799793233 | 4.852459133 | 4.814398033 | 4.740032167 |
| "Orc4"     | 6.025019533 | 6.5048347   | 6.274773867 | 6.4089721   | 6.172585433 | 6.3018599   | 6.322980533 | 6.3688561   |
| "Orc5"     | 7.512041    | 7.3990116   | 6.8113103   | 6.9478416   | 7.5321403   | 7.6311393   | 7.2358      | 7.139712    |
| "Orc6"     | 5.648149    | 4.7582884   | 5.150604    | 5.2600226   | 4.8688684   | 4.883506    | 5.146025    | 5.082433    |
| "ORF61"    | 7.6340785   | 8.527798    | 7.355356    | 7.9341335   | 8.21434     | 8.569258    | 7.6586814   | 8.21543     |
| "Orm1"     | 15.363306   | 14.820158   | 15.536208   | 15.084791   | 14.64116    | 14.802252   | 14.599058   | 14.913284   |
| "Orm2"     | 14.364457   | 12.347422   | 14.227307   | 13.324158   | 11.419841   | 13.295219   | 10.94134    | 11.903008   |

|            |             |             |             |             |             |             |             |             |
|------------|-------------|-------------|-------------|-------------|-------------|-------------|-------------|-------------|
| "Orm3"     | 10.275721   | 9.164876    | 10.097334   | 9.744633    | 7.45391     | 8.050637    | 6.7791324   | 6.7207513   |
| "Ormdl1"   | 8.004559    | 8.706314    | 8.652954    | 9.353043    | 8.268074    | 8.3652525   | 9.143922    | 9.269095    |
| "Os9"      | 8.060131    | 8.2024115   | 8.0545282   | 8.44899725  | 8.1828322   | 8.2915065   | 8.0371195   | 8.205517    |
| "Osbp"     | 7.685554    | 8.124672    | 8.118726    | 7.9925227   | 8.0656185   | 7.769771    | 7.61956     | 7.8346105   |
| "Osbpl11"  | 8.4311435   | 8.04341185  | 7.4884137   | 7.2516818   | 8.229519    | 8.056747    | 7.7912245   | 7.67108815  |
| "Osbpl1a"  | 10.6859985  | 10.6612265  | 10.2796825  | 10.7251515  | 10.6304725  | 10.890677   | 10.574081   | 10.715255   |
| "Osbpl2"   | 7.353781    | 8.095354    | 7.838198    | 8.2091875   | 7.9868937   | 7.9869742   | 7.716885    | 7.9377575   |
| "Osbpl5"   | 2.1327894   | 2.106916    | 2.0662005   | 2.418628    | 2.1279137   | 2.117041    | 2.2868419   | 2.1154928   |
| "Osbpl6"   | 3.016015    | 2.9976318   | 2.8649225   | 2.9302156   | 3.0969741   | 3.0367231   | 2.9892256   | 3.0932603   |
| "Osbpl9"   | 7.524156075 | 7.721745775 | 7.5539178   | 8.04256135  | 7.8662308   | 7.9677195   | 7.87899675  | 8.17046155  |
| "Osgep"    | 6.5387545   | 6.4319844   | 7.301606    | 7.21268     | 6.424719    | 6.5992074   | 7.2620625   | 7.431415    |
| "Osgin1"   | 9.953104    | 7.6042705   | 9.810337    | 9.304115    | 8.547182    | 7.375006    | 10.024509   | 9.900971    |
| "Osgin2"   | 3.637053    | 2.8971957   | 2.9016196   | 2.6524961   | 2.663562    | 2.73283475  | 2.7054063   | 2.5896305   |
| "Osmr"     | 7.3027754   | 5.8842435   | 7.1214204   | 6.1826987   | 6.1061506   | 7.6119027   | 6.013038    | 5.785958    |
| "Osta"     | 2.5206099   | 2.4998617   | 2.458252    | 2.4687712   | 2.5423512   | 2.5133023   | 2.5101008   | 2.5078988   |
| "Ostc"     | 7.8986735   | 8.592297    | 9.870138    | 8.967459    | 9.100601    | 8.045312    | 8.482       | 8.636248    |
| "Ostf1"    | 8.933663    | 8.413034    | 8.9928465   | 8.9547415   | 8.538586    | 8.520749    | 8.660224    | 8.727284    |
| "Otc"      | 8.947292    | 8.982036433 | 10.0004695  | 10.46859733 | 9.906010667 | 8.801427767 | 10.41284367 | 10.44867267 |
| "Otof"     | 2.6204052   | 2.586028    | 2.5570366   | 2.5295708   | 2.6061485   | 2.5995321   | 2.604528    | 2.59171     |
| "Otos"     | 2.487665    | 2.4610236   | 2.6425786   | 2.4445777   | 2.4810824   | 2.4804332   | 2.4595115   | 2.4765704   |
| "Otub1"    | 5.594355    | 5.95585155  | 5.763055    | 5.92793535  | 5.7901728   | 5.7246348   | 5.72308535  | 5.8774473   |
| "Otub2"    | 3.2873173   | 3.2174902   | 3.3483927   | 3.539044    | 3.32825     | 3.3231812   | 3.6792874   | 3.333603    |
| "Otud4"    | 8.1783627   | 7.6014921   | 7.39021035  | 7.3481071   | 7.23253565  | 7.648651    | 7.19419125  | 7.4384495   |
| "Otud5"    | 6.3261321   | 6.19491665  | 5.6780986   | 5.959131    | 5.90630075  | 5.74145065  | 5.767794    | 5.90704925  |
| "Otud6b"   | 7.9331517   | 7.94581     | 7.162353    | 7.375972    | 8.137396    | 7.7194786   | 7.9513874   | 7.914471    |
| "Otud7b"   | 4.122119    | 3.9532819   | 4.018894    | 3.7516432   | 3.926055    | 4.023767    | 3.7596612   | 4.1712365   |
| "Otx2"     | 2.5077682   | 2.4814572   | 2.4079924   | 2.4424443   | 2.5014682   | 2.4986122   | 2.497542    | 2.4924302   |
| "Ovca2"    | 5.268871    | 5.4217863   | 5.673011    | 5.8916636   | 5.6103888   | 5.5157847   | 5.4674687   | 5.2059293   |
| "Ovgp1"    | 4.312868    | 3.7303166   | 3.5766647   | 3.0671425   | 3.7440295   | 4.3449664   | 3.2219148   | 3.728196    |
| "Ovol1"    | 2.4803307   | 2.4531865   | 2.3730752   | 2.4103618   | 2.478539    | 2.5138173   | 2.4592214   | 2.5308957   |
| "Oxa1l"    | 3.0722955   | 3.0516878   | 3.3921509   | 3.0213449   | 3.15050435  | 3.07185165  | 3.1018886   | 3.11465715  |
| "Oxct1"    | 5.766066925 | 4.959604425 | 6.09055675  | 5.255747    | 4.828850125 | 4.990510025 | 5.2759159   | 5.101555025 |
| "Oxnad1"   | 7.3184566   | 7.835669    | 7.492511    | 7.6057615   | 7.7552943   | 7.633031    | 7.8477798   | 7.919305    |
| "Oxr1"     | 9.572594    | 8.8179875   | 9.075238    | 9.153692    | 8.80340565  | 8.710116    | 9.279537    | 9.274478    |
| "Oxsm"     | 2.532736933 | 2.516164167 | 2.427323433 | 2.477420233 | 2.5204358   | 2.6265378   | 2.50909333  | 2.605606967 |
| "Oxsr1"    | 6.9551554   | 7.0602093   | 6.647795    | 6.8517222   | 6.5875154   | 7.2100725   | 7.1967597   | 7.0303283   |
| "Oxtr"     | 2.5937245   | 2.566039    | 2.516745    | 2.5443268   | 2.5865028   | 2.616102    | 2.5947895   | 2.5794346   |
| "P2rx4"    | 7.9050361   | 7.26356875  | 8.43877765  | 8.611669    | 7.09868365  | 7.81189815  | 7.50550585  | 8.4094077   |
| "P2rx6"    | 2.4224198   | 2.4348886   | 2.3421502   | 2.4290817   | 2.4788795   | 2.425556    | 2.3972952   | 2.4194279   |
| "P2ry1"    | 2.4850924   | 2.8508492   | 2.4242654   | 2.5886505   | 2.4812965   | 2.4780626   | 2.476973    | 2.4583278   |
| "P2ry12"   | 5.8234324   | 2.8918092   | 6.0429425   | 5.143995    | 3.5147104   | 4.3877273   | 4.526583    | 4.55833     |
| "P2ry14"   | 4.720012    | 3.602531    | 5.549224    | 4.7534533   | 4.358618    | 4.3735833   | 4.3801427   | 4.343712    |
| "P2ry2"    | 3.377615    | 4.0579247   | 3.411122    | 2.9359157   | 3.8448634   | 3.7992895   | 3.507451    | 3.5659087   |
| "P2ry6"    | 4.3790593   | 2.9298117   | 4.6910396   | 3.8971052   | 3.5247724   | 3.2959325   | 3.462504    | 3.1952546   |
| "P4ha1"    | 3.69685065  | 3.18327425  | 3.9018517   | 3.535586    | 3.7326815   | 3.67350815  | 3.596517    | 3.38832975  |
| "P4ha2"    | 5.5396595   | 4.7509723   | 4.296027    | 3.5728738   | 5.9902554   | 4.234499    | 4.549283    | 4.5145874   |
| "P4hb"     | 12.533334   | 13.079023   | 13.173699   | 13.184117   | 13.423186   | 13.121233   | 13.253627   | 13.289682   |
| "Pa2g4"    | 6.41446154  | 6.77165384  | 6.04780688  | 6.27095916  | 6.56298696  | 6.77169642  | 6.21601086  | 6.45523166  |
| "Pabpc1"   | 9.2082255   | 9.08480175  | 8.846217    | 8.3616392   | 9.0293045   | 8.90705425  | 8.3353575   | 8.5506385   |
| "Pabpn1"   | 8.21419315  | 8.93474325  | 9.018665175 | 8.79306965  | 9.169309075 | 9.54841845  | 9.1657479   | 9.3909579   |
| "Pacrgl"   | 5.657283    | 6.000893    | 5.7669997   | 5.679709    | 5.666025    | 5.6977696   | 6.2109313   | 5.1309023   |
| "Pacs1"    | 3.2904928   | 3.2393758   | 3.2533214   | 3.2183797   | 3.2639844   | 3.2499948   | 3.2749672   | 3.2532616   |
| "Pacs2"    | 2.8507912   | 3.1279182   | 3.246836    | 2.8547049   | 3.188621    | 2.7710652   | 2.9105701   | 2.8300502   |
| "Pacsin3"  | 5.5329256   | 7.414524    | 7.2315297   | 6.953289    | 6.84194     | 7.1219397   | 6.8860965   | 6.8345394   |
| "Padi1"    | 2.5569885   | 2.532979    | 2.4734757   | 2.5041559   | 2.5420961   | 2.539617    | 2.5441182   | 2.6169035   |
| "Padi2"    | 2.3660526   | 2.3335874   | 2.2642534   | 2.313883    | 2.3554935   | 2.3620217   | 2.3600564   | 2.4079149   |
| "Pafi1"    | 6.905998    | 7.058939    | 6.831819    | 6.4858828   | 7.174779    | 7.0412855   | 6.5786295   | 6.883668    |
| "Pafah1b1" | 7.259304325 | 7.08528645  | 6.8423845   | 7.10479965  | 6.859770625 | 7.26247195  | 6.80334915  | 6.82275975  |
| "Pafah1b2" | 5.2481869   | 5.0998783   | 5.3243496   | 5.0370144   | 5.1798302   | 5.194917975 | 4.9476874   | 5.0754724   |
| "Pafah1b3" | 4.856197    | 4.7159986   | 5.66835     | 4.8533673   | 4.7240677   | 5.194676    | 5.1910615   | 5.3247256   |
| "Pafah2"   | 9.681313    | 10.584045   | 10.703042   | 10.6210575  | 10.665775   | 10.5065155  | 10.657843   | 10.515684   |
| "Pag1"     | 5.49501085  | 5.583216    | 5.6824354   | 5.5801738   | 5.4710064   | 5.39265775  | 5.4975534   | 5.2031696   |
| "Pah"      | 14.899478   | 14.691303   | 14.494556   | 14.884897   | 14.729298   | 14.669926   | 14.972609   | 14.948631   |
| "Paics"    | 11.96511683 | 11.46160767 | 10.92019867 | 11.49311133 | 11.27960833 | 11.820493   | 11.51579233 | 11.61216933 |
| "Paip1"    | 8.3739543   | 8.641766    | 7.58403135  | 7.96528985  | 8.1815393   | 8.71907675  | 7.986071    | 8.04044285  |
| "Paip2"    | 10.825646   | 10.467581   | 10.465794   | 10.815134   | 10.490593   | 10.850323   | 10.7433815  | 10.766134   |
| "Paip2b"   | 8.535706    | 8.39875     | 8.313538    | 8.597889    | 7.942545    | 8.2776375   | 8.207264    | 8.314318    |
| "Pak1"     | 3.9505941   | 3.569843767 | 4.7180774   | 4.1738643   | 3.864187767 | 3.688376167 | 4.4206981   | 4.008142433 |
| "Pak1ip1"  | 8.4684446   | 8.49978075  | 8.1622965   | 8.165876    | 8.3490285   | 8.607587    | 8.20232185  | 8.4293365   |
| "Pak2"     | 6.616995    | 6.3555243   | 6.39579635  | 6.2825307   | 6.25352835  | 6.5511522   | 6.1282041   | 6.17316535  |
| "Pak3"     | 2.5545629   | 2.5305625   | 2.4835013   | 2.49557805  | 2.5670166   | 2.64269055  | 2.54525595  | 2.56469585  |
| "Palld"    | 5.544615    | 7.580494    | 7.5044746   | 7.5195656   | 8.066219    | 7.3743057   | 8.152896    | 7.652379    |
| "Palm"     | 2.5661106   | 2.5370815   | 2.4888611   | 2.5100724   | 2.56787675  | 2.56223175  | 2.54841325  | 2.5612603   |
| "Palmd"    | 7.5678253   | 7.863001    | 7.2801323   | 7.5132933   | 7.9406      | 7.428829    | 8.0270815   | 8.112058    |
| "Pam"      | 5.388879    | 5.2921367   | 6.01747     | 5.616791    | 5.323696    | 5.2456374   | 5.8826585   | 5.3597126   |
| "Pam16"    | 11.1680765  | 11.476854   | 10.788662   | 11.000596   | 11.1294565  | 11.511146   | 10.970414   | 11.032645   |
| "Pan2"     | 6.033019    | 6.374418    | 6.273365    | 6.441797    | 6.811038    | 6.6745462   | 6.9002533   | 6.8500004   |
| "Pank1"    | 11.5605915  | 12.063276   | 11.4545165  | 12.131902   | 12.792921   | 12.18067625 | 12.4074175  | 12.54611625 |
| "Pank3"    | 8.25406075  | 8.4022868   | 7.98048025  | 8.171171    | 7.86464     | 7.68761765  | 7.89794185  | 8.064021    |
| "Panx1"    | 2.911962    | 2.7836547   | 3.463308    | 2.936277    | 2.8956149   | 2.887093    | 2.8709035   | 2.880855    |
| "Papd4"    | 7.75197515  | 7.2932343   | 7.02967125  | 7.52036185  | 7.1292355   | 7.0525702   | 7.70994325  | 7.34218175  |

|           |             |             |             |             |             |             |             |             |
|-----------|-------------|-------------|-------------|-------------|-------------|-------------|-------------|-------------|
| "Papln"   | 2.4087384   | 2.3759933   | 2.3312614   | 2.3554485   | 2.622049    | 2.385788    | 2.3854442   | 2.3806534   |
| "Papola"  | 6.0552502   | 6.26599995  | 6.202547625 | 6.24934695  | 6.226015    | 6.48035045  | 6.462268175 | 6.352018875 |
| "Papolg"  | 6.730678    | 6.810249    | 6.806484    | 6.7801313   | 6.8067226   | 6.80922     | 7.334024    | 6.7440414   |
| "Pappa"   | 2.681736    | 2.6540995   | 2.500401    | 2.633995    | 2.7077494   | 2.685223    | 2.635776    | 2.706143    |
| "Paps1"   | 6.318479    | 6.0571394   | 7.235167    | 6.5895567   | 6.370191    | 5.8142753   | 7.0764146   | 6.6697736   |
| "Paps2"   | 5.95271975  | 6.03630595  | 7.0744457   | 7.6070121   | 6.41230615  | 6.565351775 | 7.764121325 | 7.536336025 |
| "Paqr7"   | 4.816325    | 5.2016535   | 4.4855194   | 6.260784    | 6.4103937   | 5.7999225   | 6.5889463   | 6.5744243   |
| "Pard3"   | 4.25957425  | 3.9430611   | 3.49789595  | 3.49985215  | 3.7887862   | 3.8474942   | 4.2223408   | 4.1389925   |
| "Pard3b"  | 4.4301357   | 4.7175827   | 4.3521194   | 4.8174524   | 4.367438    | 6.1249824   | 4.746537    | 5.0656586   |
| "Pard6a"  | 4.8502264   | 3.4969473   | 3.462144    | 4.1317153   | 3.7025797   | 4.640928    | 3.59107     | 3.7016094   |
| "Pard6b"  | 3.23431935  | 3.46307725  | 3.4976158   | 3.48929465  | 3.4812219   | 3.6343989   | 3.4499323   | 3.5076356   |
| "Pard6g"  | 3.5073152   | 3.116963    | 3.6807456   | 3.4033804   | 2.5886831   | 3.1271296   | 3.1347275   | 2.5414069   |
| "Parg"    | 6.964559    | 6.8122973   | 6.833701    | 6.81437     | 6.6981015   | 7.1344595   | 7.025355    | 6.8428373   |
| "Park2"   | 2.598505    | 2.5567515   | 2.4996727   | 2.515279    | 2.5829768   | 2.572545    | 2.5880628   | 2.671702    |
| "Park7"   | 11.12374    | 11.9904085  | 11.6076765  | 11.566173   | 11.4149465  | 11.68190575 | 11.4480975  | 11.7012095  |
| "Parl"    | 8.69637     | 9.224574    | 8.987052    | 8.776384    | 8.931915    | 8.695055    | 8.71306     | 8.714504    |
| "Parn"    | 5.53211915  | 5.9339645   | 5.54220845  | 6.0152507   | 5.9880135   | 5.9674283   | 5.9656447   | 5.814134    |
| "Parp1"   | 6.484725433 | 6.810600167 | 7.146384767 | 7.176604333 | 7.318891933 | 6.964675    | 7.398295833 | 7.169353    |
| "Parp10"  | 5.1464243   | 5.6081076   | 6.932083    | 6.9821267   | 5.286025    | 5.199968    | 5.9567637   | 5.784459    |
| "Parp12"  | 8.46174     | 8.305664    | 9.926694    | 9.717067    | 8.425971    | 8.052669    | 8.932767    | 8.722394    |
| "Parp14"  | 7.3453937   | 7.023765    | 9.415812    | 9.251224    | 7.664927    | 7.352609    | 8.203677    | 8.315838    |
| "Parp16"  | 9.715378    | 6.492431    | 6.727728    | 7.3528657   | 6.169811    | 6.0937104   | 6.477492    | 6.342035    |
| "Parp2"   | 6.949695    | 6.9120936   | 7.248878    | 6.778728    | 6.9813166   | 6.9287257   | 6.938813    | 6.383919    |
| "Parp3"   | 6.3495818   | 6.3636345   | 7.4960665   | 7.45436935  | 6.89434235  | 6.7935324   | 7.6356802   | 7.4173805   |
| "Parp4"   | 6.6869144   | 6.1184464   | 6.4574175   | 6.7052574   | 5.3354692   | 5.8671284   | 5.846568    | 6.1072464   |
| "Parp6"   | 5.206966    | 5.054727    | 4.61606     | 5.2573338   | 5.3796887   | 5.5873914   | 5.204802    | 4.7036123   |
| "Parp8"   | 4.01111     | 3.2834556   | 4.1266375   | 4.2181835   | 3.4317896   | 3.4571722   | 3.4733262   | 3.636437    |
| "Parp9"   | 8.591406    | 9.378475    | 10.220722   | 9.939421    | 9.462051    | 9.239603    | 9.479378    | 9.607002    |
| "Pars2"   | 2.9563525   | 2.9635527   | 3.0691333   | 3.0985656   | 2.9846048   | 3.1520014   | 2.723866    | 2.9723916   |
| "Parva"   | 4.860101    | 5.1714629   | 5.4087885   | 5.4509812   | 5.18530695  | 4.86015095  | 5.15224835  | 5.3913014   |
| "Parvb"   | 2.5641325   | 2.5367205   | 2.4980853   | 2.5144515   | 2.5561953   | 2.5471427   | 2.5542545   | 2.5414898   |
| "Pate4"   | 2.4090905   | 2.377986    | 2.3214073   | 2.350706    | 2.4027376   | 2.6011853   | 2.3958197   | 2.391295    |
| "Patz1"   | 3.7016513   | 3.9767768   | 4.4694567   | 3.8222613   | 3.8809521   | 3.8750846   | 3.8861141   | 3.7277734   |
| "Pawr"    | 9.835713    | 8.450695    | 8.675028    | 8.576757    | 8.197329    | 9.133836    | 8.334257    | 8.740221    |
| "Pax4"    | 2.9883347   | 2.9549735   | 2.906813    | 2.9737554   | 2.980576    | 3.3852677   | 2.968984    | 2.9562407   |
| "Pax9"    | 2.7143726   | 2.694285    | 2.6293359   | 2.6414943   | 2.9438639   | 2.723853    | 2.7022142   | 2.7207918   |
| "Paxip1"  | 5.0412627   | 5.2725378   | 4.755489325 | 4.84442965  | 5.16169365  | 5.2541619   | 4.989401525 | 5.193455975 |
| "Pbk"     | 3.381882    | 3.369771    | 3.604775    | 3.566411    | 3.389409    | 3.3802285   | 3.3885      | 3.381097    |
| "Pbld1"   | 9.414253    | 10.580406   | 10.015654   | 10.994366   | 11.160594   | 10.9678955  | 10.653664   | 11.0316725  |
| "Pbld2"   | 8.862965    | 9.373761    | 10.106504   | 10.409843   | 10.50319    | 9.718758    | 10.453678   | 10.341372   |
| "Pbp2"    | 2.4305353   | 2.4155955   | 2.3354425   | 2.4025903   | 2.4375784   | 2.4330518   | 2.4331238   | 2.4303637   |
| "Pbrm1"   | 9.055277667 | 9.134062333 | 9.169379    | 9.227805333 | 9.458138333 | 9.435407667 | 9.378618333 | 9.560314333 |
| "Pbsn"    | 2.674783    | 2.6471164   | 2.5532238   | 2.6013787   | 2.675779    | 2.674812    | 2.6489668   | 2.6707072   |
| "Pbx1"    | 2.8131049   | 3.2119455   | 3.174341    | 2.4001813   | 2.9054573   | 2.6842723   | 3.220214    | 2.7871428   |
| "Pbx2"    | 4.755492333 | 4.673726233 | 4.857236267 | 4.828133033 | 4.757813733 | 4.782380467 | 4.846571167 | 4.851450133 |
| "Pbx3"    | 2.8697197   | 2.8327944   | 2.8053787   | 2.8140888   | 2.8531466   | 2.8440998   | 2.8561482   | 2.8380744   |
| "Pbxip1"  | 5.6924146   | 5.4062597   | 5.86945315  | 5.559206    | 5.6232217   | 5.7714092   | 5.40035245  | 5.6612745   |
| "Pcbd1"   | 11.4994135  | 11.8242     | 12.452424   | 12.46152    | 12.224351   | 11.915154   | 12.488483   | 12.399316   |
| "Pcbd2"   | 9.282044    | 9.665569    | 9.659399    | 9.9535475   | 9.460678    | 9.252347    | 9.942573    | 9.944223    |
| "Pcbp1"   | 12.490331   | 12.35279    | 12.402074   | 12.147636   | 12.606999   | 12.452377   | 12.434345   | 12.348388   |
| "Pcbp2"   | 10.06574    | 10.2761615  | 9.3115173   | 9.5412302   | 9.974873    | 9.9351415   | 9.5085033   | 9.8332015   |
| "Pcbp3"   | 3.567047    | 3.6181886   | 3.5467775   | 3.5223289   | 3.7815125   | 3.7853832   | 3.5682144   | 3.8554108   |
| "Pcbp4"   | 3.927777767 | 4.3609554   | 4.2316319   | 4.603817767 | 3.813569767 | 4.979227067 | 4.326955933 | 4.4399915   |
| "Pcca"    | 8.24147     | 9.209669    | 9.318503    | 9.8576565   | 9.297851    | 8.945748    | 9.649256    | 10.044776   |
| "Pccb"    | 8.229148    | 8.831183    | 8.373266    | 8.699049    | 8.4859295   | 8.071265    | 8.351255    | 8.670713    |
| "Pcdh1"   | 2.826122    | 3.6314244   | 3.6508057   | 3.614843    | 3.655351    | 4.074314    | 3.6559548   | 3.318946    |
| "Pcdh18"  | 2.7176297   | 2.707567133 | 2.690556767 | 2.676503033 | 2.7370549   | 2.707560667 | 2.7794298   | 2.743120067 |
| "Pcdh20"  | 2.8012505   | 2.7778077   | 2.661909    | 2.709759    | 2.8197343   | 2.8313637   | 2.7812586   | 2.8372986   |
| "Pcdh7"   | 2.536088    | 2.5065501   | 2.43850015  | 2.4701235   | 2.53045915  | 2.52916565  | 2.52163795  | 2.5193869   |
| "Pcdh8"   | 2.429561    | 2.4029489   | 2.3427186   | 2.3584697   | 2.42581     | 2.4305968   | 2.4076846   | 2.4149725   |
| "Pcdha1"  | 2.52081816  | 2.50407898  | 2.41675712  | 2.46294454  | 2.5254787   | 2.52168686  | 2.50423226  | 2.5440962   |
| "Pcdhb11" | 2.4626741   | 2.4302216   | 2.396137    | 2.3792136   | 2.4527047   | 2.4477239   | 2.4515162   | 2.4563153   |
| "Pcdhb13" | 2.3668334   | 2.3457828   | 2.2684445   | 2.3347611   | 2.3619382   | 2.35681     | 2.356773    | 2.4286616   |
| "Pcdhb14" | 3.21369665  | 3.23107785  | 3.05776     | 3.08816075  | 3.56151205  | 3.3016932   | 3.1954299   | 3.38460505  |
| "Pcdhb15" | 2.4661856   | 2.4354522   | 2.3574903   | 2.399293    | 2.4600163   | 2.4694972   | 2.4503973   | 2.4511745   |
| "Pcdhb16" | 2.5197575   | 2.4941158   | 2.4267216   | 2.5147898   | 2.5565183   | 2.5245771   | 2.4967747   | 2.5181606   |
| "Pcdhb17" | 2.5076926   | 2.469315    | 2.39151     | 2.4265246   | 2.4931371   | 2.490097    | 2.5161033   | 2.4811087   |
| "Pcdhb18" | 2.401733    | 2.3760986   | 2.3156714   | 2.332361    | 2.395073    | 2.389915    | 2.3864965   | 2.3834982   |
| "Pcdhb2"  | 2.5378096   | 2.5138736   | 2.4299085   | 2.4983027   | 2.5564413   | 2.5432138   | 2.5256784   | 2.5670102   |
| "Pcdhb20" | 2.5538437   | 2.5222075   | 2.467219    | 2.490689    | 2.54593     | 2.538653    | 2.5434234   | 2.5272927   |
| "Pcdhb22" | 2.8452694   | 2.8931117   | 2.7123404   | 2.7518268   | 2.8691638   | 2.8921525   | 2.8091407   | 2.87674     |
| "Pcdhb5"  | 2.5681505   | 2.5466988   | 2.5055027   | 2.5028934   | 2.5704296   | 2.5665643   | 2.5359297   | 2.585692    |
| "Pcdhb7"  | 2.4045844   | 2.373365    | 2.3023262   | 2.3347042   | 2.401348    | 2.3915105   | 2.392728    | 2.386239    |
| "Pcdhb9"  | 2.6651468   | 2.6375873   | 2.5512402   | 2.5888586   | 2.6660752   | 2.6742265   | 2.6426868   | 2.6735017   |
| "Pcdhga1" | 4.5361156   | 4.396966    | 4.622142    | 4.3854165   | 4.4918976   | 4.407097    | 4.4230175   | 4.3174677   |
| "Pcf11"   | 7.08996465  | 6.3910372   | 6.21768725  | 6.23084355  | 6.69831845  | 6.6019713   | 6.34306785  | 6.641386    |
| "Pcgf1"   | 2.7429461   | 2.7130153   | 2.4960754   | 2.6792712   | 2.7323837   | 2.812908    | 2.7339525   | 2.7523165   |
| "Pcgf2"   | 2.4992334   | 2.47386275  | 2.409954    | 2.4311331   | 2.50753     | 2.52857875  | 2.49354635  | 2.49955845  |
| "Pcgf6"   | 4.5838186   | 4.357339733 | 3.880556    | 3.8656951   | 4.189163833 | 4.708618333 | 4.0764405   | 4.423378233 |
| "Pcid2"   | 4.2377742   | 4.25183905  | 3.7511593   | 3.97212545  | 3.94622775  | 3.8744419   | 3.8645145   | 3.97934965  |
| "Pck1"    | 8.75882125  | 8.4664172   | 8.40929685  | 8.6298683   | 8.4292916   | 8.5608982   | 9.40676515  | 8.41479915  |

|           |             |             |             |             |             |             |             |             |
|-----------|-------------|-------------|-------------|-------------|-------------|-------------|-------------|-------------|
| "Pck2"    | 3.7859362   | 3.7845183   | 4.00366135  | 3.7018386   | 3.9165468   | 4.0248125   | 3.8894408   | 3.7768426   |
| "Pcm1"    | 4.5672629   | 4.27445138  | 4.0939254   | 4.00757418  | 4.22810644  | 4.24279344  | 4.23697788  | 4.20681124  |
| "Pcm11"   | 7.95314585  | 8.2554545   | 8.08105815  | 7.93275975  | 8.34635025  | 8.000146675 | 8.287934125 | 8.38529905  |
| "Pcmtd1"  | 9.345245867 | 9.0632185   | 8.951773933 | 9.6161019   | 9.326501333 | 9.446438533 | 9.504876667 | 9.6567015   |
| "Pcmtd2"  | 8.90342625  | 8.5638375   | 8.668128    | 9.2613105   | 8.7231575   | 9.0821255   | 9.624598    | 9.4732485   |
| "Pcna"    | 10.409123   | 10.0063925  | 10.462484   | 10.184204   | 9.78253     | 10.070749   | 10.010834   | 10.009681   |
| "Pcnp"    | 10.1203505  | 9.96308     | 9.7394425   | 9.985188    | 10.164159   | 10.068188   | 10.2118305  | 10.1796545  |
| "Pcnx"    | 5.4625118   | 5.67698115  | 5.55597065  | 5.4699886   | 5.697184    | 5.7046647   | 5.7564335   | 5.56479595  |
| "Pcnxl3"  | 6.550051    | 7.0047493   | 7.0277076   | 6.9586005   | 6.743743    | 6.966576    | 6.9970245   | 6.79364     |
| "Pcolce"  | 5.9333656   | 5.58958775  | 7.1509395   | 6.6858082   | 6.14889435  | 5.8191348   | 6.8270095   | 6.491962    |
| "Pcolce2" | 6.8563266   | 5.0864124   | 7.3205366   | 6.7645473   | 6.139612    | 4.8264775   | 7.303354    | 6.2970896   |
| "Pcp2"    | 2.62623715  | 2.59011175  | 2.543429    | 2.5499061   | 2.6202155   | 2.6140579   | 2.61553385  | 2.6134938   |
| "Pcp4"    | 2.5693107   | 2.5455108   | 2.5244532   | 2.5360603   | 2.5623822   | 2.5595899   | 2.5283608   | 2.5541477   |
| "Pcp4l1"  | 8.513203    | 9.24909     | 8.955416    | 9.394621    | 9.184597    | 9.307077    | 10.111656   | 7.9412584   |
| "Pcsk4"   | 3.5900025   | 6.431261    | 4.3785563   | 7.0041785   | 6.398161    | 5.3934307   | 6.0653896   | 6.5258794   |
| "Pcsk5"   | 4.7250938   | 4.766854033 | 4.733496667 | 4.695628433 | 4.736855567 | 5.093236433 | 5.010082667 | 4.239268467 |
| "Pcsk6"   | 8.750733    | 9.653257    | 9.055635    | 10.18932    | 9.84648     | 9.417107    | 10.148169   | 9.72072     |
| "Pcsk7"   | 6.268611    | 7.2751126   | 7.00114     | 6.923776    | 7.1075606   | 7.2576      | 6.8090386   | 7.0224395   |
| "Pctp"    | 6.0236669   | 7.57454675  | 6.87964365  | 6.89734525  | 6.924774    | 6.66374825  | 7.2117865   | 6.785461    |
| "Pcx"     | 7.15336992  | 8.22934688  | 7.18146728  | 7.27680866  | 7.7586427   | 7.49633596  | 6.9002939   | 7.2050341   |
| "Pcyox1"  | 8.09278     | 8.617765    | 8.981547    | 8.99998     | 8.985238    | 8.385202    | 8.759024    | 8.896091    |
| "Pcyl1a"  | 6.00477765  | 6.5327007   | 6.3416276   | 6.5981065   | 6.55403075  | 6.13971985  | 6.556769925 | 6.2996129   |
| "Pcyl2"   | 10.087548   | 10.373694   | 10.438302   | 10.354102   | 10.417884   | 10.443212   | 10.693915   | 10.765584   |
| "Pdap1"   | 8.41075275  | 8.7014621   | 8.55066835  | 8.6014392   | 8.4833165   | 8.448007    | 8.4858405   | 8.4815405   |
| "Pdc"     | 2.8132474   | 2.7803624   | 2.6914623   | 2.675705    | 2.8053713   | 2.8513236   | 2.7698452   | 2.7991517   |
| "Pdcd1"   | 2.5296025   | 2.4946504   | 2.4187095   | 2.4539056   | 2.52698     | 2.5233839   | 2.5146255   | 2.5195785   |
| "Pdcd10"  | 8.6993465   | 8.48936475  | 8.83426015  | 8.5285599   | 8.41651     | 8.25727465  | 8.4753155   | 8.3959145   |
| "Pdcd2"   | 8.408442    | 8.738632    | 8.075956    | 8.501416    | 8.677592    | 9.102653    | 8.517703    | 8.875454    |
| "Pdcd2l"  | 6.4389063   | 6.5145493   | 6.3396869   | 6.71587885  | 6.492812    | 6.82457435  | 6.77469835  | 7.07648615  |
| "Pdcd4"   | 10.434399   | 11.419007   | 11.622031   | 11.368287   | 11.247393   | 11.2577505  | 11.622323   | 11.450735   |
| "Pdcd6"   | 10.908734   | 10.864423   | 10.836916   | 11.046643   | 10.6981325  | 10.754669   | 10.562537   | 10.630215   |
| "Pdcd6lp" | 5.45518476  | 5.6575234   | 5.47739964  | 5.7568135   | 5.6833852   | 5.54852782  | 5.77598926  | 5.72051874  |
| "Pdcd7"   | 5.8357887   | 5.631569    | 5.5599003   | 5.9412994   | 5.516527    | 5.8417916   | 5.654766    | 5.6324215   |
| "Pdc1"    | 7.61866475  | 7.7737817   | 7.969855    | 7.862743    | 8.1390015   | 7.71071005  | 8.36304025  | 8.1383025   |
| "Pdc12"   | 2.9912248   | 2.9831607   | 2.8589594   | 2.9087846   | 3.0134907   | 3.0358763   | 2.9262009   | 3.0409546   |
| "Pdc13"   | 8.264091    | 7.5126514   | 8.476522    | 7.7625794   | 7.5156846   | 7.8529253   | 8.057686    | 7.769861    |
| "Pde10a"  | 2.45109505  | 2.4231243   | 2.39806675  | 2.38609245  | 2.44434225  | 2.4432803   | 2.4413231   | 2.45311165  |
| "Pde12"   | 7.8839803   | 7.5862937   | 7.3137426   | 6.9994683   | 7.3980846   | 7.648232    | 7.3526387   | 7.0660405   |
| "Pde1a"   | 3.3936996   | 3.3571458   | 3.284935    | 3.6939547   | 3.3848848   | 3.3686018   | 3.3942971   | 3.3577075   |
| "Pde1b"   | 2.947908    | 2.6907227   | 3.052561    | 2.9026303   | 2.628998    | 2.6106699   | 2.7081301   | 2.6886938   |
| "Pde1c"   | 2.62335565  | 2.61857225  | 2.50167015  | 2.5354395   | 2.6268      | 2.6524405   | 2.6053467   | 2.6498029   |
| "Pde2a"   | 6.137293    | 5.1563025   | 5.2061834   | 4.4126406   | 6.255684    | 6.0138454   | 5.894217    | 5.407953    |
| "Pde3a"   | 2.4050065   | 2.37083575  | 2.31625255  | 2.35165595  | 2.3943317   | 2.3936617   | 2.390131    | 2.385157    |
| "Pde4b"   | 9.8418285   | 6.0792948   | 7.2030198   | 6.41374945  | 4.06231225  | 5.845899    | 5.48769405  | 5.97682525  |
| "Pde4dip" | 5.5490367   | 5.3739455   | 4.99650885  | 5.44110615  | 5.43317105  | 5.78350235  | 5.5000855   | 5.5372541   |
| "Pde6a"   | 2.469       | 2.4361174   | 2.3568323   | 2.403314    | 2.4590178   | 2.4534683   | 2.4554534   | 2.4504757   |
| "Pde6b"   | 2.6345224   | 2.6168048   | 2.5504878   | 2.5556445   | 2.641692    | 2.6323397   | 2.6080294   | 2.6370595   |
| "Pde6c"   | 2.521614    | 2.4706485   | 2.4517934   | 2.4774613   | 2.5368412   | 2.5149515   | 2.5252554   | 2.508606    |
| "Pde6d"   | 4.945442    | 4.843411    | 4.705003    | 5.3695793   | 4.342247    | 4.893872    | 5.2129555   | 4.822766    |
| "Pde6g"   | 2.59460305  | 2.62585115  | 2.47482715  | 2.5199232   | 2.5957198   | 2.58226715  | 2.53545215  | 2.5770422   |
| "Pde6h"   | 4.1947491   | 5.499564    | 4.4060397   | 4.4822802   | 4.5235825   | 5.46240115  | 4.46514705  | 4.4488345   |
| "Pde7a"   | 2.641771767 | 2.609014733 | 2.594240333 | 2.5752042   | 2.6294141   | 2.7707294   | 2.619072267 | 2.621767267 |
| "Pde7b"   | 2.6408482   | 2.1283493   | 2.1374936   | 2.1118073   | 2.1572165   | 2.1448402   | 2.1516056   | 2.1422524   |
| "Pde8a"   | 7.3115472   | 6.0820855   | 7.1555941   | 7.09218335  | 6.7309649   | 6.94297115  | 7.103325    | 6.9937651   |
| "Pde9a"   | 4.241457    | 4.919044    | 5.8335495   | 3.8772564   | 4.669679    | 4.583183    | 5.1987314   | 4.571537    |
| "Pdf"     | 8.061316    | 8.183953    | 8.210748    | 7.462143    | 8.342529    | 8.191747    | 8.183017    | 8.1055      |
| "Pdgfa"   | 4.14210825  | 4.389827    | 4.072114    | 4.81307635  | 3.68011545  | 4.270529    | 3.93146905  | 4.2569276   |
| "Pdgfb"   | 2.313077    | 2.2878358   | 2.2318635   | 2.3794353   | 2.3192177   | 2.3149247   | 2.289233    | 2.3120146   |
| "Pdgfc"   | 7.2109001   | 5.9461507   | 7.8096765   | 6.743526    | 5.4835904   | 5.6858897   | 6.67283865  | 6.18033215  |
| "Pdgfd"   | 2.4083788   | 2.3909495   | 2.3267348   | 2.358836    | 2.422344    | 2.472334    | 2.3965104   | 2.4290757   |
| "Pdgfra"  | 7.657005    | 6.7445774   | 6.0639997   | 5.718535    | 6.953625    | 7.031649    | 6.10403     | 5.7562165   |
| "Pdgfrb"  | 5.5984281   | 4.87456455  | 5.3568946   | 5.561933    | 5.19813835  | 5.24850565  | 5.6424658   | 5.3122991   |
| "Pdha1"   | 8.44431725  | 9.2617758   | 8.65951265  | 8.8850853   | 9.490097    | 8.9230937   | 8.7229545   | 9.2252319   |
| "Pdhb"    | 8.3641525   | 9.6869095   | 8.9908405   | 9.41380165  | 10.57953975 | 9.2862695   | 9.06244225  | 9.624334    |
| "Pdla3"   | 10.255289   | 10.553087   | 11.053305   | 10.886056   | 11.642002   | 11.138197   | 11.220507   | 11.355      |
| "Pdla4"   | 8.466265    | 8.625657    | 9.48542     | 9.160366    | 9.9893265   | 9.706248    | 9.497037    | 9.496593    |
| "Pdla5"   | 10.048053   | 9.4101715   | 9.890971    | 10.169201   | 9.93575     | 9.733378    | 9.601604    | 10.556046   |
| "Pdla6"   | 5.53851965  | 5.45054945  | 5.91218155  | 5.79844525  | 6.57455335  | 6.3052826   | 6.06900535  | 6.1195863   |
| "Pdik1l"  | 4.4893327   | 4.914660533 | 4.793469633 | 5.055710667 | 5.219660067 | 5.2385916   | 5.3317047   | 5.419144767 |
| "Pdk1"    | 8.6645372   | 10.50737375 | 8.663031    | 9.648672    | 10.6449215  | 9.040459    | 9.754139    | 9.6762895   |
| "Pdk2"    | 4.577778    | 4.8837433   | 4.3363323   | 5.5429587   | 4.78615     | 4.2587557   | 4.9405107   | 4.752985    |
| "Pdk3"    | 2.850196    | 2.3249254   | 2.27057     | 2.3406796   | 2.3489847   | 2.3380942   | 2.3310037   | 2.362279    |
| "Pdk4"    | 8.166913    | 5.908271    | 4.5873537   | 3.9586217   | 5.148037    | 8.083473    | 6.053389    | 4.1944857   |
| "Pdlim1"  | 9.443038    | 8.690156    | 8.730551    | 8.099579    | 7.9795494   | 8.326241    | 8.013444    | 7.594022    |
| "Pdlim2"  | 2.7290895   | 2.6826618   | 2.7981505   | 2.8406634   | 2.6556394   | 2.643884    | 2.8506556   | 2.6997683   |
| "Pdlim3"  | 2.8395858   | 2.819239    | 2.7161837   | 2.738223    | 2.8804846   | 2.8610978   | 2.8054988   | 2.8362958   |
| "Pdlim4"  | 4.047079    | 2.7116401   | 5.056182    | 4.9516945   | 3.0731032   | 3.1488569   | 3.8816497   | 4.103577    |
| "Pdlim5"  | 5.141041517 | 5.4968343   | 5.131732767 | 5.035172    | 5.3030051   | 5.245151267 | 5.368639433 | 5.3199783   |
| "Pdlim7"  | 3.0171597   | 2.76075205  | 2.71349015  | 2.61315875  | 3.1675958   | 2.76762895  | 2.7640855   | 2.79426095  |
| "Pdpk1"   | 8.540922    | 8.75129275  | 8.25657865  | 8.4154175   | 8.59645375  | 9.078453    | 8.276572    | 8.57524     |
| "Pdpn"    | 3.9508605   | 3.0906699   | 2.8667948   | 2.7929854   | 2.6813545   | 2.3646133   | 2.8773022   | 2.825072    |

|            |             |             |             |             |             |             |             |             |
|------------|-------------|-------------|-------------|-------------|-------------|-------------|-------------|-------------|
| "Pdrgr1"   | 4.76640385  | 4.5926817   | 4.705116075 | 5.10876835  | 4.840219925 | 4.868810325 | 4.9240318   | 4.917534925 |
| "Pds5a"    | 6.4110827   | 6.996006    | 6.75548     | 6.746634    | 7.0842276   | 6.8904276   | 6.697055    | 6.6196885   |
| "Pdss1"    | 2.95571715  | 3.1988936   | 3.10449705  | 2.69419195  | 3.37719645  | 3.0099412   | 3.4365805   | 3.0251624   |
| "Pdx1"     | 2.808673    | 2.7708616   | 2.7138357   | 2.6855235   | 2.9050272   | 2.7799323   | 2.786125    | 2.7758548   |
| "Pdxdc1"   | 5.11238785  | 5.185533025 | 5.112523325 | 5.06326365  | 5.0791534   | 5.06744225  | 4.87723365  | 5.012761275 |
| "Pdxk"     | 4.992622767 | 5.429011    | 5.3499031   | 5.655156467 | 5.078748667 | 4.453592867 | 5.258474533 | 5.7907754   |
| "Pdzd11"   | 6.6632695   | 6.926979    | 6.8869677   | 6.8150415   | 6.9661193   | 6.823107    | 6.908176    | 6.658369    |
| "Pdzk1"    | 7.11641     | 7.4881864   | 8.230638    | 8.281522    | 8.321308    | 7.540344    | 8.620011    | 8.223397    |
| "Pdzk1ip1" | 4.9049529   | 4.8352708   | 7.39691265  | 6.446594    | 4.6568545   | 4.5077876   | 4.41324885  | 5.2816751   |
| "Pdzn3"    | 6.670218    | 7.5456457   | 6.923987    | 5.951641    | 7.64318     | 6.684139    | 7.4214616   | 6.5244107   |
| "Pea15a"   | 5.06884675  | 3.94129135  | 5.82093785  | 5.04299     | 4.1719742   | 3.7542375   | 5.38977665  | 4.6939618   |
| "Pear1"    | 3.800062    | 3.74875465  | 3.1775861   | 3.59594595  | 3.5936307   | 3.7061482   | 3.62898025  | 3.59068495  |
| "Pebsp1"   | 10.7580295  | 11.470553   | 11.5407635  | 12.25043    | 11.89287225 | 11.6531115  | 12.0379025  | 12.1169505  |
| "Pecam1"   | 3.3814194   | 2.5816185   | 3.1358814   | 3.1512363   | 3.1840324   | 3.0941224   | 3.230679    | 3.1039453   |
| "Pecr"     | 7.35293     | 8.53014585  | 8.56928485  | 8.74638565  | 9.67794665  | 8.37394     | 9.4826368   | 8.9823515   |
| "Pef1"     | 7.593771    | 7.7020874   | 8.270099    | 8.037689    | 7.8419375   | 7.532311    | 7.66096     | 7.763361    |
| "Peg10"    | 2.5214934   | 2.4924703   | 2.4204376   | 2.4783967   | 2.5344303   | 2.514194    | 2.5079021   | 2.6171458   |
| "Peg12"    | 3.1432886   | 3.1529555   | 2.9652658   | 3.0339015   | 3.2177112   | 3.260329    | 3.092084    | 3.214027    |
| "Peg3"     | 6.3209766   | 5.1798413   | 4.365081567 | 3.754097733 | 5.327104033 | 5.7434034   | 4.533231133 | 4.0305178   |
| "Peli1"    | 8.02005125  | 7.5393185   | 7.89718325  | 7.733872    | 7.7185343   | 8.078248    | 8.1915605   | 7.96519085  |
| "Peli2"    | 4.096031    | 3.591035    | 3.4652357   | 3.4794466   | 3.3811002   | 3.49851     | 3.262425    | 3.4924648   |
| "Pelo"     | 6.289921    | 6.4842486   | 6.7170234   | 6.048336    | 7.1605897   | 6.6590195   | 6.485637    | 6.9406915   |
| "Pelp1"    | 5.6060977   | 5.362301    | 5.672434    | 5.208515    | 5.39683     | 4.9954095   | 5.3164463   | 5.132368    |
| "Pemt"     | 7.0230937   | 7.434162    | 7.9444385   | 6.3138695   | 6.118054    | 6.1036224   | 7.0224347   | 7.896279    |
| "Pepd"     | 8.223222    | 8.560798    | 8.90164     | 8.864723    | 8.896088    | 8.47543     | 8.888661    | 8.864653    |
| "Per1"     | 7.5474715   | 7.7179255   | 5.7711267   | 6.814233    | 7.517051    | 7.776479    | 5.801516    | 6.964608    |
| "Per2"     | 4.06632465  | 4.71261435  | 3.4431874   | 4.22162915  | 4.6799675   | 3.81487545  | 3.6859409   | 4.3247559   |
| "Per3"     | 2.46542905  | 4.5736379   | 4.28250025  | 5.2803681   | 5.05247735  | 4.16476355  | 4.08205505  | 5.1611381   |
| "Perp"     | 9.359657    | 10.615398   | 10.199114   | 10.629768   | 10.915907   | 10.332649   | 10.949282   | 10.602295   |
| "Pes1"     | 6.1548073   | 6.25630575  | 5.51042925  | 5.59795     | 5.7440171   | 6.0545926   | 5.5310672   | 5.66939045  |
| "Pet112l"  | 6.5689807   | 6.9620852   | 7.3503857   | 7.7858334   | 6.9731627   | 6.2505903   | 7.6851444   | 7.765563    |
| "Pex11a"   | 8.580753    | 10.2465365  | 7.8184621   | 8.33602475  | 10.534193   | 10.138108   | 9.349086    | 9.09467125  |
| "Pex11b"   | 4.74879775  | 5.786376    | 5.24491695  | 5.80683165  | 5.68314825  | 5.6307458   | 5.28786725  | 5.52305115  |
| "Pex12"    | 7.753163    | 8.074233    | 7.627335    | 7.9121737   | 8.114765    | 8.331013    | 7.7673173   | 7.6580296   |
| "Pex13"    | 7.5803125   | 7.8145595   | 7.15074375  | 7.2945465   | 7.639695    | 7.8813218   | 7.55383385  | 7.42157775  |
| "Pex14"    | 7.2722435   | 8.475519    | 7.6110563   | 8.133783    | 8.517915    | 8.471096    | 7.95508     | 8.239008    |
| "Pex16"    | 5.89265865  | 6.6892197   | 5.76889825  | 6.082454    | 6.22857955  | 6.2668775   | 6.04591965  | 6.0205678   |
| "Pex19"    | 5.6440022   | 7.7318813   | 6.37669665  | 6.8882044   | 7.201079    | 6.3504002   | 6.89698815  | 6.88122485  |
| "Pex26"    | 6.0483246   | 7.32057     | 7.426642    | 7.9353065   | 8.05118     | 7.2676754   | 7.956022    | 8.112941    |
| "Pex3"     | 8.50579645  | 8.9333835   | 8.4083385   | 8.47794515  | 8.72058175  | 8.57608365  | 8.44935885  | 8.1759095   |
| "Pex5"     | 5.6648692   | 6.6111727   | 6.1472526   | 6.6221438   | 6.65943335  | 6.513299    | 6.2298005   | 6.49808645  |
| "Pex6"     | 7.271694025 | 7.165362925 | 7.06743435  | 7.372369625 | 7.381052825 | 7.691112825 | 7.477223675 | 7.522361575 |
| "Pex7"     | 10.4492655  | 10.720855   | 10.974858   | 10.952676   | 11.191043   | 10.797905   | 11.083734   | 11.033456   |
| "Pf4"      | 7.953572    | 6.2661734   | 7.7083344   | 7.098896    | 6.7762127   | 7.4862223   | 6.404854    | 5.3848867   |
| "Pfdn1"    | 8.270575    | 8.144941    | 8.849532    | 8.713819    | 8.22323     | 8.175497    | 9.1324625   | 8.687792    |
| "Pfdn2"    | 8.782823    | 8.794182    | 8.567409    | 8.678847    | 8.72815     | 8.8456745   | 8.594763    | 8.832305    |
| "Pfdn5"    | 6.40128784  | 6.4037196   | 6.27383204  | 6.26952262  | 6.2901552   | 6.28145444  | 6.22864902  | 6.28650838  |
| "Pfkfb1"   | 7.4159794   | 8.635742    | 7.8414507   | 7.5935884   | 7.766531    | 8.160814    | 7.248691    | 7.373365    |
| "Pfkfb2"   | 2.99141815  | 2.91658505  | 2.783324    | 2.8147347   | 2.89661215  | 3.01280835  | 2.8269355   | 2.877804    |
| "Pfkfb3"   | 5.8208733   | 7.282706    | 5.21171     | 5.863555    | 6.530057    | 6.6038795   | 6.002923    | 7.433598    |
| "Pfkf"     | 3.5794235   | 3.442225    | 3.62218855  | 3.7588236   | 3.6757661   | 3.7646848   | 3.5713259   | 3.61038705  |
| "Pfkrm"    | 4.7134166   | 5.172686    | 5.351376    | 5.350129    | 5.5791726   | 5.5635495   | 5.462177    | 5.880555    |
| "Pfkp"     | 4.609293    | 3.905522    | 5.0797663   | 4.3969216   | 4.063194    | 4.0684466   | 4.4100995   | 4.185162    |
| "Pfn1"     | 8.851158    | 9.120222    | 9.735864    | 9.328179    | 9.192696    | 9.180248    | 9.259806    | 9.267314    |
| "Pfn2"     | 4.571304133 | 4.856861467 | 6.273827633 | 5.037478    | 4.136236633 | 3.961028767 | 4.322970933 | 4.458825533 |
| "Pfn3"     | 2.4109688   | 2.382812    | 2.3090851   | 2.3483386   | 2.4065294   | 2.4010572   | 2.3620362   | 2.5188909   |
| "Pgarn1"   | 10.662301   | 10.574059   | 10.809496   | 10.348707   | 10.764232   | 10.623942   | 11.132991   | 10.575705   |
| "Pgarn5"   | 7.92861     | 7.9814887   | 7.566227    | 7.3654823   | 7.411016    | 7.795183    | 7.4784274   | 7.749943    |
| "Pgarp2"   | 7.354707667 | 7.767633    | 8.699245467 | 8.585798133 | 7.566192433 | 7.517545    | 8.096993833 | 8.0262181   |
| "Pgarp"    | 6.7352764   | 6.7205317   | 6.64273235  | 6.86162     | 6.83313885  | 6.8200292   | 6.86793435  | 6.8890535   |
| "Pgd"      | 8.9002875   | 9.4006017   | 9.9870003   | 8.81741525  | 9.25766435  | 7.92105575  | 8.463983    | 8.224671325 |
| "Pgf"      | 2.4494061   | 2.415844    | 2.368568    | 2.4057894   | 2.4454608   | 2.4474018   | 2.4355185   | 2.4298604   |
| "Pgf1"     | 11.70385367 | 11.79938033 | 11.77703867 | 11.70125633 | 11.890619   | 11.6850495  | 11.82104367 | 11.86587333 |
| "Pgf2"     | 2.8677204   | 2.8538117   | 2.7418182   | 2.7860405   | 2.8758354   | 2.8693564   | 2.793054    | 2.8606138   |
| "Pgl5"     | 8.176642    | 8.762721    | 8.267517    | 7.8528333   | 8.282797    | 8.327985    | 8.02338     | 8.289634    |
| "Pglyrp2"  | 8.994503    | 9.064786    | 9.512916    | 9.636223    | 9.254134    | 9.32035     | 8.988218    | 9.207774    |
| "Pgm1"     | 6.5023437   | 5.494936    | 6.4295096   | 5.525776    | 5.737631    | 5.7400002   | 5.6494975   | 5.7285013   |
| "Pgm2"     | 9.359978    | 10.397375   | 9.751875    | 10.263754   | 10.431404   | 10.158804   | 10.363718   | 10.390862   |
| "Pgp"      | 7.4667318   | 7.50076875  | 7.1795945   | 6.8346045   | 7.25966165  | 7.28589165  | 7.009706    | 7.4287257   |
| "Pgpep1"   | 6.271962    | 6.9507833   | 8.007929    | 7.77691     | 6.250786    | 8.037749    | 8.211473    | 7.9765186   |
| "Pgr"      | 2.435957    | 2.405039    | 2.3355827   | 2.374268    | 2.4261553   | 2.41795     | 2.424532    | 2.415492    |
| "Pgrmc1"   | 14.1075535  | 14.262454   | 14.218209   | 14.530655   | 14.236028   | 13.913857   | 14.331817   | 14.271342   |
| "Pgrmc2"   | 7.387042    | 8.002558    | 7.831778    | 7.740375    | 7.693887    | 7.54314085  | 7.96014135  | 7.7555153   |
| "Pgs1"     | 4.7766738   | 4.6250849   | 4.699378267 | 4.2566675   | 4.646487    | 4.783290667 | 4.3581774   | 4.525293333 |
| "Phactr1"  | 2.6857061   | 2.628769    | 2.570207    | 2.6039424   | 2.6472232   | 2.638619    | 2.586173    | 2.6336098   |
| "Phactr2"  | 2.9301822   | 3.337382    | 2.9856443   | 2.8650591   | 2.8750048   | 2.737968    | 3.6452088   | 2.9922783   |
| "Phax"     | 9.597557    | 9.330178    | 9.027735    | 8.882463    | 8.852201    | 9.555993    | 8.817352    | 8.692546    |
| "Phb2"     | 10.67845367 | 11.39574967 | 10.68968783 | 10.70985633 | 11.40837633 | 11.20265633 | 10.87194233 | 10.985034   |
| "Phc1"     | 3.1156387   | 3.0341384   | 3.010445    | 3.0074809   | 3.052007    | 3.0473747   | 3.0622332   | 3.0351446   |
| "Phc2"     | 7.649489    | 6.8028903   | 7.32884875  | 6.9179843   | 6.89615985  | 6.89425995  | 7.2002126   | 6.63315535  |
| "Phex"     | 2.4113712   | 2.3833106   | 2.309698    | 2.3449805   | 2.4084105   | 2.4022484   | 2.4000535   | 2.404453    |

|            |             |             |             |             |             |             |             |             |
|------------|-------------|-------------|-------------|-------------|-------------|-------------|-------------|-------------|
| "Phf1"     | 4.022015    | 3.960816    | 3.2609925   | 4.013144    | 4.003673    | 4.0100713   | 4.0102077   | 4.6754913   |
| "Phf10"    | 8.018835    | 8.62593     | 7.973976    | 8.21632     | 8.264971    | 8.542545    | 8.060985    | 8.60719     |
| "Phf12"    | 3.147955    | 3.117882    | 3.049736    | 3.0809808   | 3.2285714   | 3.136506    | 3.1378605   | 3.1271954   |
| "Phf13"    | 6.7527895   | 5.6673737   | 4.1701927   | 5.27775     | 5.379797    | 5.694045    | 5.4576006   | 5.520543    |
| "Phf17"    | 7.763828925 | 7.74817395  | 7.48222655  | 7.84489415  | 7.57167     | 7.830203325 | 7.906724625 | 8.162650325 |
| "Phf2"     | 4.1944119   | 4.24143535  | 4.05942665  | 4.15008135  | 4.2454057   | 4.3409064   | 4.2098954   | 4.27931095  |
| "Phf20"    | 5.706385225 | 5.24110095  | 5.3125844   | 5.090693425 | 5.17217825  | 5.2979022   | 5.16028215  | 5.118008075 |
| "Phf20i1"  | 5.8895165   | 6.3073515   | 5.370404    | 5.4247494   | 5.79965305  | 6.09018665  | 5.6936582   | 5.701538    |
| "Phf21a"   | 6.10106345  | 5.6443382   | 6.01166185  | 5.77734755  | 5.7795823   | 6.04950935  | 5.71306275  | 5.808433    |
| "Phf23"    | 7.694466    | 7.6513467   | 7.571828    | 7.262708    | 7.6151285   | 7.976709    | 7.431028    | 7.568636    |
| "Phf3"     | 2.67745865  | 2.4757441   | 2.38845965  | 2.38769575  | 2.40580545  | 2.4000927   | 2.4107915   | 2.4195973   |
| "Phf5a"    | 8.470187    | 8.753778    | 8.12206     | 8.145945    | 8.757479    | 8.712688    | 8.052114    | 8.511729    |
| "Phf7"     | 4.537562    | 4.5803461   | 4.16049245  | 4.41131715  | 4.41774245  | 4.8648881   | 4.2687535   | 4.4757742   |
| "Phf8"     | 6.5873075   | 7.6777086   | 6.6827      | 6.9755206   | 7.229913    | 7.093698    | 6.6693635   | 6.8303375   |
| "Phgdh"    | 2.5621009   | 2.593555375 | 2.495885725 | 2.526333075 | 2.5775758   | 2.55520455  | 2.545334775 | 2.559704025 |
| "Phgr1"    | 2.645091    | 2.7165937   | 2.5375323   | 2.5754318   | 2.6525855   | 2.7654672   | 2.622644    | 2.8775692   |
| "Phip"     | 4.650535933 | 5.029098767 | 4.913067933 | 4.9356068   | 5.014286933 | 4.967371767 | 5.061754767 | 5.127249633 |
| "Phka1"    | 2.561889033 | 2.933869033 | 2.947458367 | 2.965049467 | 2.774002633 | 2.932660033 | 2.926695333 | 3.1456859   |
| "Phka2"    | 3.9299674   | 4.4916304   | 4.50460625  | 4.74885565  | 4.5964874   | 4.47560035  | 4.64844725  | 4.77914905  |
| "Phkb"     | 7.337197    | 8.115524    | 8.311722    | 8.63301     | 8.069786    | 7.5119953   | 8.499404    | 8.5815735   |
| "Phkg1"    | 2.7128284   | 2.68774585  | 2.5960382   | 2.62642225  | 2.7205529   | 2.73839045  | 2.687639    | 2.7431355   |
| "Phkg2"    | 6.109723    | 6.1127256   | 5.3228483   | 5.7745028   | 6.2844696   | 6.3891616   | 5.693281    | 6.26334     |
| "Phlda1"   | 9.657346    | 11.32243    | 11.19183    | 11.8957     | 10.684885   | 10.716842   | 11.407633   | 11.892779   |
| "Phlda3"   | 3.2507868   | 3.423727    | 3.4099596   | 3.412536    | 4.3692102   | 3.449706    | 3.5994875   | 3.4464962   |
| "Phldb1"   | 2.93764375  | 2.938501    | 3.32461075  | 3.2766918   | 2.9678688   | 3.2997899   | 3.5527555   | 3.2164188   |
| "Phldb2"   | 7.3564143   | 7.849193    | 8.676443    | 9.120639    | 8.389847    | 8.091667    | 9.343961    | 9.145233    |
| "Phlpp1"   | 8.184456    | 6.96089     | 7.0654826   | 7.3168526   | 7.1539054   | 7.6219163   | 7.6289806   | 7.60779     |
| "Phospho2" | 7.3570355   | 7.0165463   | 6.5905677   | 6.49099325  | 7.1803534   | 7.5452088   | 6.87244275  | 6.835995    |
| "Phox2a"   | 2.5992746   | 2.5620708   | 2.4475708   | 2.557663    | 2.5810843   | 2.624491    | 2.586289    | 2.5674925   |
| "Phox2b"   | 2.3166575   | 2.2799656   | 2.2433507   | 2.2197464   | 2.3010652   | 2.2933319   | 2.3025162   | 2.5294225   |
| "Phpt1"    | 7.0633345   | 7.608975    | 7.8513775   | 8.025053    | 7.0755873   | 6.9684076   | 7.482387    | 7.7205944   |
| "Phtf1"    | 3.9936125   | 4.090202    | 4.0103445   | 4.0454965   | 4.105106    | 4.3482785   | 4.2563047   | 4.245259    |
| "Phtf2"    | 6.469125    | 6.446967    | 6.4124737   | 6.467388    | 6.467708    | 6.6734815   | 6.927948    | 6.7358317   |
| "Phxr1"    | 5.0713735   | 3.228893    | 3.6834157   | 3.6342068   | 2.9828231   | 3.5965414   | 3.0644588   | 4.066319    |
| "Phxr2"    | 2.486507    | 2.4526172   | 2.3672876   | 2.421422    | 2.477621    | 2.4700012   | 2.4633286   | 2.4629445   |
| "Phxr4"    | 2.010194    | 2.1273      | 2.3805532   | 2.4221637   | 2.151335    | 2.1367984   | 2.1579103   | 2.1368725   |
| "Phxr5"    | 4.1339335   | 4.3097954   | 4.187975    | 4.4933286   | 4.6612396   | 4.1440372   | 4.1050105   | 4.136659    |
| "Phyh"     | 14.277062   | 14.935503   | 14.077407   | 14.429819   | 14.437384   | 14.483356   | 14.382573   | 14.504666   |
| "Phyhip1"  | 3.225832    | 3.2214545   | 3.0824416   | 3.17390915  | 3.2716786   | 3.2795907   | 3.2185599   | 3.35344565  |
| "Pi15"     | 2.8504322   | 2.8404984   | 2.7882595   | 2.8124921   | 2.9353096   | 2.854309    | 2.8446772   | 2.8761063   |
| "Pi16"     | 2.60974905  | 2.5688521   | 2.5724195   | 2.54146265  | 2.60554575  | 2.60249675  | 2.57270385  | 2.60253885  |
| "Pi4k2a"   | 8.3312105   | 7.950511    | 8.0233675   | 7.7324678   | 7.38357165  | 7.69258075  | 7.5693123   | 7.55105385  |
| "Pi4k2b"   | 6.711225033 | 5.792582    | 5.023586    | 5.023221333 | 5.3896381   | 5.4836409   | 5.015630633 | 5.1423558   |
| "Pi4ka"    | 5.74881035  | 6.01355335  | 5.33081025  | 5.4470741   | 5.7188988   | 5.80240125  | 5.3242007   | 5.5191535   |
| "Pias1"    | 5.825339033 | 5.770137133 | 5.741760533 | 5.728846667 | 5.8104895   | 5.950323267 | 6.073456667 | 5.571121833 |
| "Pias2"    | 6.257797    | 6.35587595  | 5.4937913   | 5.50223635  | 6.04160035  | 6.4664941   | 5.8218708   | 5.930235    |
| "Pias3"    | 3.76846585  | 3.6079313   | 3.694748    | 4.16110305  | 3.978499    | 3.86128315  | 4.04282485  | 4.1929419   |
| "Pias4"    | 4.0604434   | 4.0705576   | 3.9867418   | 4.011641    | 4.0459394   | 4.037461    | 4.049198    | 4.322283    |
| "Pibf1"    | 2.6523266   | 2.6220803   | 2.5647304   | 2.6880794   | 2.6489289   | 2.6764007   | 2.6396613   | 2.6414907   |
| "Picalm"   | 11.346504   | 11.063005   | 10.797195   | 10.681785   | 11.01078    | 11.295816   | 10.511101   | 10.455236   |
| "Pick1"    | 5.794985    | 5.9135904   | 5.720554    | 5.684674    | 5.7725263   | 5.8777122   | 5.6886845   | 5.750852    |
| "Piga"     | 6.987038    | 5.6064343   | 5.5746865   | 5.777665    | 6.9164004   | 5.774368    | 5.565661    | 5.4483624   |
| "Pigb"     | 2.6594892   | 2.623146    | 2.5542355   | 2.585289    | 2.6505585   | 2.6444426   | 2.632261    | 2.6347144   |
| "Pigc"     | 4.49540365  | 4.72722075  | 4.59651825  | 4.83582185  | 4.61602285  | 4.98272455  | 4.6233372   | 4.8842737   |
| "Pigd"     | 7.165041    | 7.182148    | 6.3590055   | 6.177406    | 6.035883    | 7.226906    | 6.4430213   | 6.4502697   |
| "Pigh"     | 4.912956    | 4.3928742   | 5.5933943   | 5.202116    | 4.6106515   | 5.3540516   | 5.909846    | 4.4963226   |
| "Pigk"     | 4.7049422   | 4.9146184   | 5.197196867 | 5.045589    | 5.034345467 | 4.791154    | 5.049925133 | 5.018636833 |
| "Pigm"     | 5.039617    | 4.0272036   | 4.2166123   | 3.5071955   | 3.3523552   | 3.0152926   | 3.5583758   | 2.9858296   |
| "Pign"     | 2.2684839   | 2.2191722   | 2.197072    | 2.210815    | 2.2466192   | 2.2513485   | 2.6364024   | 2.2347658   |
| "Pigo"     | 6.239294533 | 6.911575667 | 7.031928867 | 6.636933    | 6.709284933 | 6.877982233 | 6.910284833 | 6.964415833 |
| "Pigp"     | 8.212197    | 8.375202    | 8.503227    | 8.438372    | 8.216503    | 8.023291    | 8.643971    | 8.033976    |
| "Pigq"     | 5.44474396  | 5.54443762  | 5.7324666   | 6.086794    | 5.82443068  | 5.73253056  | 5.90238484  | 5.77979704  |
| "Pigr"     | 11.841071   | 11.9539525  | 12.4066915  | 12.515207   | 12.05878125 | 11.7232745  | 12.4862035  | 12.732366   |
| "Pigs"     | 5.0773773   | 5.71598     | 5.0339427   | 5.292698    | 5.1586905   | 5.4349074   | 5.0565057   | 4.729062    |
| "Pigu"     | 3.9692425   | 4.3621608   | 4.256608667 | 4.125313867 | 4.070310233 | 4.361640433 | 4.364910033 | 4.270450467 |
| "Pigx"     | 5.43866085  | 5.7826734   | 5.24941575  | 5.3020397   | 5.52405875  | 5.774022    | 5.3330311   | 5.6169548   |
| "Pigyl"    | 7.7269564   | 7.6022115   | 7.594566    | 7.761888    | 7.390468    | 7.7693048   | 7.4502354   | 7.864193    |
| "Pih1d1"   | 8.411436    | 8.773157    | 8.49966     | 8.679287    | 8.731823    | 8.756946    | 8.5280285   | 8.654633    |
| "Pik3c2a"  | 6.4536081   | 6.83121315  | 6.07937725  | 6.02235365  | 6.23986195  | 6.57839     | 6.0425059   | 6.3068752   |
| "Pik3c2g"  | 2.9556482   | 4.769869    | 4.6861386   | 4.5888467   | 4.7049503   | 4.984445    | 4.7237434   | 4.7042046   |
| "Pik3c3"   | 6.6851616   | 6.5733147   | 6.5008674   | 6.7230062   | 6.7814336   | 6.630364    | 6.751166    | 6.695484    |
| "Pik3ca"   | 7.6426996   | 7.6363963   | 7.3018318   | 7.797979    | 7.56536865  | 7.8017902   | 7.73163635  | 7.68019225  |
| "Pik3cd"   | 3.7460248   | 2.9016306   | 4.944914    | 4.551696    | 3.7319603   | 3.7324295   | 4.081546    | 3.5461516   |
| "Pik3r1"   | 6.6833816   | 7.177155867 | 6.1520362   | 6.310792433 | 7.4217821   | 6.320123833 | 6.864081    | 6.642482567 |
| "Pik3r2"   | 2.5243764   | 2.242968    | 2.4356077   | 2.4516995   | 2.512943    | 2.5486789   | 2.5002315   | 2.8055992   |
| "Pik3r4"   | 7.6895313   | 7.5302677   | 7.826248    | 7.616128    | 7.820301    | 7.6228724   | 7.7850485   | 7.5685105   |
| "Pilra"    | 7.299866    | 4.745314    | 7.7219114   | 6.759183    | 6.006897    | 5.474417    | 6.8762555   | 6.0911665   |
| "Pilrb1"   | 8.285035    | 6.019159    | 9.041501    | 8.329136    | 7.366471    | 7.291248    | 8.014048    | 7.3787503   |
| "Pim1"     | 6.59224225  | 4.8177841   | 5.3885405   | 4.87607135  | 4.39875245  | 4.7716748   | 4.85663495  | 4.90197515  |
| "Pim3"     | 8.997179    | 7.384342033 | 6.472812267 | 6.737840867 | 7.3046321   | 7.982732667 | 6.8297231   | 7.208903    |
| "Pin1"     | 7.716991    | 8.36003     | 7.802403    | 7.8297014   | 7.57209     | 7.967479    | 7.524025    | 7.463057    |

|            |             |             |             |             |             |             |             |             |
|------------|-------------|-------------|-------------|-------------|-------------|-------------|-------------|-------------|
| "Pink1"    | 10.225864   | 10.400068   | 9.690823    | 9.825661    | 10.092894   | 10.245068   | 10.052877   | 9.755036    |
| "Pinx1"    | 5.2045174   | 5.927142    | 5.0101295   | 4.2624626   | 5.362288    | 5.4461355   | 4.7435327   | 5.1766415   |
| "Pion"     | 1.8661853   | 2.3517625   | 5.176118    | 3.5168502   | 2.4819474   | 2.4734974   | 4.860688    | 2.6590586   |
| "Pip"      | 2.6045084   | 2.5683877   | 2.4675725   | 2.5087101   | 2.613514    | 2.58641     | 2.5692205   | 2.5754828   |
| "Pip4k2a"  | 4.962874767 | 4.1677175   | 5.4377405   | 4.623658    | 4.289386833 | 4.472382067 | 4.618131567 | 4.372739633 |
| "Pip4k2b"  | 2.9331076   | 2.9366238   | 2.7581568   | 2.8191783   | 3.0201268   | 3.0110822   | 2.8854096   | 2.9656303   |
| "Pip4k2c"  | 4.48971615  | 4.6149018   | 4.3292595   | 4.4960897   | 4.24757535  | 4.5866636   | 4.2962497   | 4.3405535   |
| "Pip5k1a"  | 5.2154669   | 4.58056075  | 4.7741321   | 4.596104675 | 4.623592    | 4.748369925 | 4.538760975 | 4.629750425 |
| "Pip5k1b"  | 2.9452806   | 2.9367318   | 2.8805978   | 2.881196    | 2.9628992   | 2.9605327   | 2.9078224   | 2.9868007   |
| "Pip5k1c"  | 5.253433    | 5.088106    | 5.4073744   | 5.77324     | 5.7964044   | 5.35244     | 5.6796365   | 5.425091    |
| "Pipox"    | 9.311845    | 9.595623    | 9.71919     | 10.381077   | 10.33726    | 9.287845    | 10.179589   | 10.431784   |
| "Pira1"    | 8.662452    | 5.2371216   | 8.099762    | 6.9857407   | 5.9215293   | 6.4831524   | 7.0400767   | 6.393321    |
| "Pira2"    | 2.81533     | 2.7806213   | 2.7086382   | 2.7445393   | 2.8123434   | 2.8237133   | 2.7994716   | 2.8151565   |
| "Pisd-ps1" | 6.888093067 | 6.856325333 | 7.654030667 | 7.6926916   | 7.255581467 | 7.643661267 | 7.955745    | 7.645319433 |
| "Pisd-ps3" | 8.345988    | 8.4052565   | 9.11760175  | 9.0422375   | 8.7116335   | 9.147606    | 9.1681535   | 9.0269165   |
| "Pisd"     | 9.078653    | 9.223721    | 9.455301    | 9.40621     | 9.3095455   | 9.56845     | 9.646953    | 9.601641    |
| "Pitpna"   | 8.260975    | 7.7704698   | 8.034203    | 7.7260395   | 7.806835    | 7.88075425  | 7.6669455   | 7.4111585   |
| "Pitpnb"   | 3.808248667 | 4.101689567 | 3.994458767 | 3.745686167 | 3.787596933 | 3.725923167 | 4.537071867 | 4.2464035   |
| "Pitpnc1"  | 6.390626825 | 4.979971425 | 5.18513615  | 5.492682963 | 5.31416305  | 5.217217013 | 5.361241938 | 5.495889375 |
| "Pitpnm1"  | 4.91401645  | 4.54989605  | 4.9958512   | 4.795508275 | 4.83058105  | 4.7378935   | 4.7089322   | 4.76864455  |
| "Pitpnm2"  | 2.97810625  | 2.89718875  | 2.89075005  | 2.9422919   | 3.00471215  | 2.9902142   | 2.98224235  | 3.19185545  |
| "Pitrm1"   | 5.518104    | 5.8965766   | 5.77872325  | 6.1038611   | 5.90011425  | 5.9358592   | 6.24830785  | 5.86786535  |
| "Pitx2"    | 2.5311      | 2.4982264   | 2.4664333   | 2.4721184   | 2.518353    | 2.5069125   | 2.514323    | 2.5035903   |
| "Piwil1"   | 2.3895354   | 2.353533    | 2.3216538   | 2.3267522   | 2.3742092   | 2.3651335   | 2.3444474   | 2.4187026   |
| "Piwil2"   | 2.4438875   | 2.4072664   | 2.3479886   | 2.6591988   | 2.434802    | 2.41914     | 2.4329913   | 2.4181683   |
| "Pja1"     | 6.03826495  | 6.255617775 | 5.548851025 | 6.014090975 | 6.0989441   | 6.12099015  | 6.1172958   | 6.22964225  |
| "Pja2"     | 5.3853149   | 5.815973167 | 5.551847833 | 5.526646933 | 5.640980133 | 5.525071233 | 5.825429333 | 5.549377633 |
| "Pkd1"     | 2.266892    | 2.383631    | 2.2076159   | 2.4703944   | 2.2416494   | 2.248841    | 2.253027    | 2.235678    |
| "Pkd2"     | 6.5804214   | 6.4189      | 6.879884    | 6.6390767   | 6.6630487   | 7.3375883   | 7.1252975   | 6.829358    |
| "Pkdcc"    | 6.79946435  | 6.155444    | 6.58427165  | 6.760339    | 6.19596275  | 6.62280835  | 6.68772245  | 6.5405109   |
| "Pkhd1"    | 3.342706    | 2.6610403   | 5.886889    | 5.7924924   | 5.3111334   | 4.3293734   | 6.828469    | 6.154535    |
| "Pkia"     | 2.8055955   | 2.78347455  | 2.80552055  | 2.7515687   | 2.80748505  | 2.86448505  | 2.7579441   | 2.8820618   |
| "Pkib"     | 3.5110262   | 3.15561665  | 3.8192636   | 3.67781785  | 3.27567755  | 3.22907055  | 3.6131188   | 3.1306053   |
| "Pklr"     | 3.717507533 | 6.9099945   | 4.412712433 | 5.303205567 | 7.215524533 | 5.3982245   | 4.858160167 | 5.734331167 |
| "Pkm"      | 4.521126    | 2.831716    | 4.6191587   | 3.1622834   | 3.6182706   | 3.2321832   | 3.7589157   | 3.3779545   |
| "Pkmyt1"   | 3.51985355  | 3.4952299   | 3.438063    | 3.4430961   | 3.6717205   | 3.5148339   | 3.33408895  | 3.50708425  |
| "Pkn1"     | 4.5928364   | 4.631891    | 4.764386    | 4.886852    | 4.4414387   | 4.8142643   | 4.7746696   | 4.9429216   |
| "Pknox1"   | 2.6515403   | 3.05332885  | 2.5868479   | 2.64427355  | 2.807437    | 3.0015943   | 2.5881995   | 2.72303485  |
| "Pknox2"   | 2.4175525   | 2.3899705   | 2.339912    | 2.3490026   | 2.4133906   | 2.4066381   | 2.411273    | 2.4314227   |
| "Pkp2"     | 6.14404565  | 6.118662625 | 6.1756744   | 5.866002975 | 6.313598125 | 5.9706766   | 6.654220875 | 6.18366285  |
| "Pkp3"     | 2.342138    | 2.311457    | 2.2839344   | 2.3405824   | 2.330729    | 2.3237586   | 2.334309    | 2.317552    |
| "Pkp4"     | 9.009195    | 9.1103775   | 9.0190735   | 9.2245725   | 9.60833075  | 8.7775455   | 9.247144    | 9.540215    |
| "Pla1a"    | 9.21601     | 8.909447    | 10.851469   | 10.226601   | 9.361195    | 8.9542      | 9.4324875   | 9.589765    |
| "Pla2g12a" | 6.9980254   | 7.2995677   | 5.959339    | 5.648255    | 6.517987    | 7.5946245   | 5.69129     | 6.362121    |
| "Pla2g12b" | 9.395659    | 9.508437    | 9.924734    | 9.57126     | 9.087113    | 9.19421     | 9.600784    | 9.311369    |
| "Pla2g15"  | 5.492544    | 5.48306     | 6.741526    | 6.5179067   | 5.85034     | 5.5081053   | 6.2779055   | 5.8821497   |
| "Pla2g16"  | 6.9692273   | 6.506625    | 8.217773    | 7.0667996   | 7.057133    | 5.8362775   | 7.6463485   | 7.332398    |
| "Pla2g2a"  | 2.4001594   | 2.385329    | 2.3548899   | 2.4283576   | 2.410708    | 2.403563    | 2.385325    | 2.39721     |
| "Pla2g2c"  | 2.9255157   | 2.9385636   | 2.8592234   | 2.863375    | 3.1791117   | 2.9194515   | 2.915669    | 2.9968631   |
| "Pla2g2d"  | 2.8101459   | 2.7760048   | 2.7356143   | 2.7686338   | 2.8055508   | 2.7923117   | 2.7565293   | 2.7915092   |
| "Pla2g4a"  | 5.6045413   | 5.5795636   | 7.5649304   | 7.0732336   | 6.393533    | 6.681283    | 7.2064905   | 6.297879    |
| "Pla2g4f"  | 3.218874    | 3.2424715   | 3.0207522   | 3.1315718   | 3.2888248   | 3.3450913   | 3.1371796   | 3.2954266   |
| "Pla2g5"   | 2.6796603   | 2.652754    | 2.5700893   | 2.6058695   | 2.7079763   | 2.673649    | 2.6501994   | 2.6734693   |
| "Pla2g6"   | 6.165843    | 6.454512    | 6.199412    | 6.33353     | 6.679026    | 7.279039    | 6.9904504   | 7.636941    |
| "Pla2g7"   | 9.489113    | 8.3050995   | 8.220768    | 7.402257    | 7.963       | 8.669767    | 6.3490744   | 6.236704    |
| "Pla2r1"   | 3.09052205  | 3.0601044   | 3.18662265  | 3.1095016   | 3.248338    | 3.0443167   | 3.1724261   | 3.17715285  |
| "Plaa"     | 8.8415575   | 9.35342     | 8.863892    | 8.735445    | 9.276614    | 9.674656    | 9.091504    | 9.289355    |
| "Plac8"    | 10.616823   | 8.109892    | 10.44856    | 9.333606    | 8.229361    | 7.9043417   | 8.680485    | 7.97721     |
| "Plagl1"   | 5.611977    | 4.049635    | 6.1146903   | 5.795951    | 5.1517444   | 4.9049616   | 5.757863    | 4.6513495   |
| "Plagl2"   | 3.10953855  | 2.828638    | 3.0245082   | 2.874915    | 2.93197025  | 2.8479297   | 2.8602929   | 2.8401723   |
| "Plat"     | 2.7769089   | 2.7927122   | 2.8848333   | 3.037608    | 2.7739043   | 2.7991614   | 2.576169    | 2.7774773   |
| "Plau"     | 2.6394677   | 2.6273012   | 2.599752    | 2.5713475   | 2.6581671   | 2.6386743   | 2.631185    | 2.6846838   |
| "Plaur"    | 3.8158138   | 3.5023315   | 3.3291748   | 3.396927    | 3.4171593   | 3.4286416   | 3.329923    | 3.414854    |
| "Plbd1"    | 10.369594   | 10.866019   | 10.654941   | 10.486872   | 10.375732   | 10.534808   | 10.158844   | 10.112454   |
| "Plbd2"    | 4.4551283   | 4.40106465  | 4.0765095   | 4.41162685  | 4.04527875  | 3.96141135  | 3.69728245  | 4.15170765  |
| "Plcb1"    | 2.6737587   | 2.6712397   | 2.555786633 | 2.621314767 | 2.7555553   | 2.714496367 | 2.6418655   | 2.7157881   |
| "Plcb2"    | 3.0752854   | 3.064434    | 2.878958    | 3.0545812   | 3.0617304   | 3.2106962   | 3.0715685   | 3.1134517   |
| "Plcb3"    | 3.555752    | 3.376582    | 3.7698603   | 3.9097345   | 3.97145     | 4.001894    | 4.338405    | 3.7349656   |
| "Plcb4"    | 2.4945807   | 2.4589002   | 2.3697424   | 2.4406748   | 2.485913    | 2.485434    | 2.4683945   | 2.4648566   |
| "Plce1"    | 7.1856413   | 6.3581276   | 6.0195003   | 6.4591956   | 6.071158    | 6.3575015   | 6.0943127   | 6.180167    |
| "Plcg1"    | 2.3695815   | 2.335405    | 2.29431     | 2.3293195   | 2.3567147   | 2.350023    | 2.357109    | 2.343866    |
| "Plcg2"    | 6.027945    | 5.444113    | 7.09543     | 6.2946615   | 5.728685    | 5.628064    | 6.0762267   | 6.0375457   |
| "Plcl2"    | 6.790298    | 7.3806624   | 7.09851     | 6.9192424   | 7.471052    | 7.214082    | 7.394636    | 7.439686    |
| "Plcz1"    | 2.7836554   | 2.7601836   | 2.6531754   | 2.7154624   | 2.785616    | 2.793728    | 2.753079    | 2.7972388   |
| "Plid1"    | 4.459953333 | 3.723878467 | 5.049455767 | 4.399169433 | 4.1201918   | 4.130835467 | 4.550048667 | 4.228659933 |
| "Plid2"    | 4.292515    | 4.277638    | 4.3004875   | 4.3385515   | 4.300103    | 4.210125    | 4.306684    | 4.292899    |
| "Plid3"    | 5.9140644   | 4.592391    | 6.1187387   | 5.7736325   | 5.2446465   | 4.781424    | 5.4389796   | 5.277511    |
| "Plid4"    | 5.9636726   | 4.790072    | 7.3843865   | 6.626545    | 5.504759    | 5.396447    | 6.0577035   | 5.351224    |
| "Plidn"    | 5.5031237   | 5.8455259   | 5.9686949   | 5.8651007   | 5.783273    | 5.7343928   | 5.6997658   | 5.975703    |
| "Plec"     | 5.299148    | 5.12756705  | 5.6383745   | 5.175664    | 5.1588238   | 5.01801705  | 4.9680408   | 5.4552778   |
| "Plek"     | 6.16023     | 4.06820515  | 6.55325875  | 5.2269504   | 4.5597765   | 4.66883145  | 4.74214585  | 4.5037074   |

|            |             |             |             |             |             |             |             |             |
|------------|-------------|-------------|-------------|-------------|-------------|-------------|-------------|-------------|
| "Plek2"    | 3.1675785   | 3.1407633   | 3.3275242   | 3.0608017   | 3.2418017   | 3.19024     | 3.1308737   | 3.2480567   |
| "Plekha1"  | 6.0374136   | 5.245641    | 5.813483    | 5.258276    | 5.1397967   | 5.303608    | 5.31571     | 4.9437513   |
| "Plekha2"  | 5.7847004   | 4.4456916   | 6.7605934   | 6.401826    | 5.8830028   | 5.0935087   | 6.2490673   | 5.4585705   |
| "Plekha3"  | 5.6994525   | 5.36338265  | 5.1038625   | 5.1754826   | 5.30780935  | 5.17054085  | 5.29253375  | 5.26791295  |
| "Plekha4"  | 2.757703667 | 2.7381422   | 2.675821533 | 2.699753067 | 2.7452863   | 2.8133904   | 2.7374537   | 2.780299167 |
| "Plekha5"  | 3.607158    | 4.01501895  | 3.8822919   | 4.2410945   | 4.168324    | 4.17062835  | 4.07492435  | 4.5741818   |
| "Plekha6"  | 5.0652995   | 5.1339097   | 5.3072696   | 6.0784817   | 5.498478    | 5.5169897   | 5.8250484   | 6.193728    |
| "Plekha7"  | 2.88818205  | 3.28057575  | 3.3814292   | 3.26974545  | 3.14315375  | 3.29374375  | 3.2950089   | 3.7599628   |
| "Plekhb1"  | 6.071767    | 5.9279976   | 6.054041    | 5.541285    | 6.0407305   | 5.803603    | 6.065537    | 6.026506    |
| "Plekhb2"  | 6.8088136   | 6.2362375   | 7.147557    | 6.9385204   | 6.4690003   | 6.1896935   | 7.1698327   | 6.7309804   |
| "Plekhf1"  | 5.08058     | 5.3290267   | 5.58212     | 5.858641    | 5.964666    | 6.117897    | 6.2206464   | 6.248988    |
| "Plekhf2"  | 4.2996843   | 3.43762265  | 3.03977685  | 3.2807303   | 3.14281     | 3.3655248   | 3.38919995  | 3.55917975  |
| "Plekhg2"  | 4.7980356   | 4.7394905   | 5.1766768   | 4.7404838   | 4.5558815   | 5.195752    | 4.6254125   | 4.7552247   |
| "Plekhg5"  | 3.3738928   | 3.041416    | 3.3544493   | 3.1183603   | 2.4833417   | 3.2227833   | 2.5664866   | 3.1344357   |
| "Plekhg6"  | 4.76915     | 5.7055607   | 4.530348    | 5.319455    | 4.945984    | 4.5961666   | 4.8898745   | 5.2004747   |
| "Plekhh1"  | 2.7321446   | 2.70850525  | 2.63240455  | 2.6685655   | 2.7269831   | 2.7245352   | 2.71453535  | 2.7291125   |
| "Plekhh3"  | 4.9967217   | 5.170232    | 4.5533366   | 5.4591746   | 5.1855373   | 5.4594936   | 5.1966677   | 5.0280995   |
| "Plekhl1"  | 2.9221013   | 2.9114206   | 2.8590336   | 2.891473    | 2.7674773   | 2.8922648   | 2.8991644   | 2.858306    |
| "Plekhn1"  | 2.6741476   | 2.6384504   | 2.4841793   | 2.6253102   | 2.6917758   | 2.6515782   | 2.5862536   | 2.663832    |
| "Plekho1"  | 4.6037946   | 3.3062766   | 4.5733614   | 3.928978    | 3.9536989   | 3.9442801   | 3.9716396   | 3.9435377   |
| "Plg"      | 13.9782715  | 14.030039   | 14.12265    | 14.176047   | 14.414778   | 14.2851305  | 14.017004   | 14.29066    |
| "Plin2"    | 10.860485   | 12.381671   | 11.429204   | 11.659009   | 12.6655     | 13.237733   | 12.378159   | 12.130777   |
| "Plin3"    | 6.581494    | 7.672169    | 7.09075     | 6.939961    | 7.069513    | 7.6511354   | 6.9237022   | 7.188003    |
| "Plin4"    | 3.9022875   | 5.19413     | 3.1870346   | 3.0855775   | 5.7843533   | 5.378413    | 3.8879561   | 3.1618755   |
| "Plin5"    | 8.606551    | 10.424597   | 6.222135    | 6.5813303   | 9.712079    | 10.966785   | 8.510888    | 7.5804505   |
| "Plk2"     | 7.6840024   | 6.3438697   | 7.1834383   | 7.3539834   | 6.133457    | 7.5648837   | 7.411327    | 6.954415    |
| "Plk3"     | 10.674164   | 8.608804    | 7.4450994   | 8.036034    | 6.839005    | 8.762615    | 5.5432725   | 7.646962    |
| "Plk4"     | 2.5647483   | 2.53967467  | 3.100093833 | 2.657792033 | 2.6133739   | 2.586358233 | 2.675965367 | 2.56601267  |
| "Pllp"     | 4.211978    | 4.8243566   | 4.512797    | 4.576402    | 5.217461    | 5.245838    | 4.877503    | 4.896189    |
| "Pln"      | 2.445361    | 2.4401371   | 2.3656602   | 2.3897514   | 2.5007284   | 2.4758196   | 2.4370253   | 2.438627    |
| "Plod1"    | 7.4921227   | 6.9482417   | 7.289528    | 7.1667404   | 7.48774     | 7.448737    | 7.0201645   | 6.4898863   |
| "Plod2"    | 2.7072027   | 2.6786938   | 3.347441    | 2.9078162   | 2.7117338   | 2.7026408   | 2.6942167   | 2.6968787   |
| "Plod3"    | 5.0623627   | 4.402043    | 4.322588    | 4.6911      | 4.572211    | 4.9216523   | 4.12526     | 4.367306    |
| "Plp1"     | 2.94540435  | 2.93413715  | 2.8086765   | 2.9311764   | 2.932615    | 2.9767957   | 2.9158039   | 3.01132405  |
| "Plp2"     | 3.88930735  | 3.48902465  | 4.1820874   | 3.270041    | 3.53629255  | 3.3088621   | 3.4532317   | 3.54675865  |
| "Plrg1"    | 8.263945    | 8.457774    | 8.344071    | 7.8575034   | 8.395354    | 8.501191    | 8.395635    | 8.2460375   |
| "Pls1"     | 3.0784922   | 3.3966188   | 3.6527653   | 4.4263105   | 3.4269142   | 3.4231787   | 3.9908867   | 3.4249818   |
| "Pls3"     | 9.370409    | 9.332884    | 10.334793   | 10.371133   | 10.048232   | 9.664492    | 10.878656   | 10.288121   |
| "Plscr1"   | 9.070238    | 8.25207725  | 9.430042    | 8.857947    | 7.2644745   | 8.2179765   | 8.7577965   | 8.6124175   |
| "Plscr2"   | 8.431254    | 7.574047    | 8.100916    | 8.994712    | 8.013529    | 7.938632    | 9.200535    | 8.42453     |
| "Plscr3"   | 3.70884255  | 3.6471865   | 3.76462745  | 3.71819865  | 3.68282885  | 3.5912263   | 3.6988516   | 3.65663255  |
| "Pltp"     | 7.524896    | 5.9948208   | 6.9738985   | 6.475768    | 6.7467131   | 6.492686    | 6.4560637   | 6.377481    |
| "Plvap"    | 9.196633    | 7.9067006   | 9.050223    | 8.535949    | 8.686761    | 8.408438    | 9.001882    | 8.191672    |
| "Plxdc2"   | 3.238434    | 3.2134662   | 3.1180546   | 3.1923432   | 3.2343123   | 3.2233047   | 3.2165978   | 3.3415592   |
| "Plxna2"   | 5.7864747   | 5.8671966   | 6.258713    | 5.8501916   | 5.781873    | 5.752727    | 6.144215    | 5.7931037   |
| "Plxnb2"   | 7.0239687   | 7.0547      | 8.21008     | 7.819054    | 7.4196506   | 7.5554075   | 7.5110645   | 7.5356894   |
| "Plxnc1"   | 6.0990365   | 5.183822633 | 5.335776167 | 5.506580233 | 5.765311333 | 5.4768852   | 5.6954174   | 5.345955033 |
| "Plxnd1"   | 7.4738674   | 5.6406765   | 7.283293    | 7.55583     | 6.9513497   | 6.7857604   | 7.4221935   | 7.065403    |
| "Pm20d1"   | 9.1299001   | 9.7089325   | 10.0057955  | 10.8448145  | 9.741413    | 9.2222397   | 10.736708   | 10.2429995  |
| "Pmaip1"   | 6.9085093   | 4.070233    | 5.850251    | 4.8880224   | 4.5639567   | 4.440759    | 4.7747035   | 4.2727284   |
| "Pmel"     | 2.359556    | 2.3252242   | 2.2655678   | 2.4666247   | 2.350483    | 2.3390465   | 2.292872    | 2.3330665   |
| "Pmpa1"    | 3.240673    | 3.24163735  | 3.2283852   | 3.18821955  | 3.2130723   | 3.21361515  | 3.11258615  | 3.2084976   |
| "Pmf1"     | 2.5946821   | 2.9268508   | 3.1157862   | 2.9996131   | 3.0333954   | 3.03367495  | 2.94368395  | 3.0223045   |
| "Pml"      | 4.064158    | 3.5640242   | 5.351439    | 4.96906     | 3.8239124   | 3.7146895   | 4.7247033   | 4.5029616   |
| "Pmm1"     | 2.9810747   | 2.701362    | 2.7085582   | 2.77104005  | 2.8577482   | 2.929779    | 2.7496717   | 2.6698948   |
| "Pmm2"     | 4.6003998   | 4.99361845  | 5.12481165  | 4.86269525  | 5.35799235  | 4.62684965  | 4.958582    | 5.243439    |
| "Pmp22"    | 7.67743     | 5.738901    | 6.98838     | 6.85319     | 6.246403    | 4.8468857   | 6.711413    | 5.9623723   |
| "Pmpca"    | 7.4006845   | 8.14816065  | 7.71025035  | 7.7042923   | 7.98205     | 7.77243115  | 7.8193495   | 7.921403    |
| "Pmpcb"    | 10.05911775 | 10.527637   | 10.338661   | 10.6710535  | 10.601621   | 10.665485   | 11.1204995  | 10.73871    |
| "Pms2"     | 3.0739305   | 2.987459    | 2.997491    | 3.0214367   | 3.065281    | 2.6231205   | 3.066303    | 3.1804569   |
| "Pmvpk"    | 10.545897   | 9.13773     | 9.803267    | 8.678994    | 6.9885097   | 6.450959    | 8.135759    | 8.713256    |
| "Pnkd"     | 6.5777111   | 7.0776135   | 7.56663485  | 7.648832    | 7.0381417   | 7.6706385   | 7.9114175   | 7.294068    |
| "Pnkp"     | 4.719034    | 5.315128    | 5.2701035   | 4.99696     | 5.0250216   | 5.122401    | 5.4607515   | 5.066209    |
| "Pnlip"    | 2.6498537   | 2.61748     | 2.5354881   | 2.571514    | 2.648692    | 2.6399794   | 2.6319027   | 2.6466305   |
| "Pnliipr2" | 2.638649    | 2.60928055  | 2.5142721   | 2.55628385  | 2.64929775  | 2.6451879   | 2.60729225  | 2.66717865  |
| "Pnmt"     | 3.4138687   | 3.3903697   | 3.3090315   | 3.3371792   | 3.416672    | 3.5436957   | 3.4377928   | 3.25392     |
| "Pnn"      | 6.501612633 | 6.929446767 | 6.5337042   | 6.740509667 | 7.246705533 | 6.961221133 | 6.681167433 | 6.8029848   |
| "Pno1"     | 8.472344    | 8.89865     | 8.348162    | 8.630177    | 8.64007     | 8.776907    | 8.544743    | 8.475521    |
| "Pnp"      | 12.0258215  | 10.5381175  | 11.8012735  | 10.584164   | 10.5963045  | 10.611998   | 11.0996275  | 10.1763175  |
| "Pnp1a2"   | 5.69783725  | 5.6206061   | 4.7287689   | 4.9144955   | 5.3170843   | 5.4378972   | 4.6216447   | 4.97785     |
| "Pnp1a3"   | 2.3908737   | 2.361877    | 2.3434544   | 2.3154404   | 2.4558306   | 2.3752367   | 2.3770416   | 2.373593    |
| "Pnp1a6"   | 4.7213554   | 5.5673876   | 5.441674    | 5.050992    | 5.8444967   | 5.323516    | 4.7989626   | 4.9135604   |
| "Pnp1a7"   | 9.732746    | 11.534128   | 10.951149   | 10.586828   | 10.543913   | 11.174044   | 10.927364   | 10.960121   |
| "Pnp1a8"   | 11.0621395  | 11.128912   | 10.778429   | 11.047967   | 11.230012   | 11.419447   | 10.983994   | 11.138334   |
| "Pnpa"     | 9.837196    | 9.628839    | 9.708524    | 9.836954    | 10.040248   | 9.422113    | 9.564388    | 9.742446    |
| "Pnrc1"    | 7.7470978   | 6.47657535  | 6.6637129   | 6.49226085  | 6.1605926   | 6.73081755  | 6.73418525  | 6.4387802   |
| "Pnrc2"    | 9.687978    | 9.237843    | 9.333206    | 9.2404045   | 9.1279075   | 9.5578525   | 9.9450645   | 9.2663335   |
| "Poc5"     | 2.76591505  | 2.5980005   | 2.6693785   | 2.7010342   | 2.76264695  | 2.7721429   | 3.0535601   | 2.96389415  |
| "Podxl"    | 5.152787    | 5.2227197   | 5.8153224   | 5.8224697   | 5.2557697   | 4.4387603   | 5.707668    | 5.5062094   |
| "Pof1b"    | 2.7500525   | 2.7205296   | 2.608756    | 2.677978    | 2.7584279   | 2.756099    | 2.7202954   | 2.768457    |
| "Pofut2"   | 7.96957615  | 6.92742265  | 7.3145745   | 6.9607962   | 6.7879975   | 7.3338465   | 7.14398535  | 7.1538733   |

|            |             |            |             |             |             |             |             |             |
|------------|-------------|------------|-------------|-------------|-------------|-------------|-------------|-------------|
| "Poglut1"  | 6.5163527   | 6.766747   | 6.736904    | 6.398353    | 6.3257523   | 6.8994265   | 6.814148    | 5.800109    |
| "Pola1"    | 3.466299    | 3.423497   | 3.9544415   | 4.330631    | 2.8229723   | 3.4356425   | 4.405207    | 3.9921138   |
| "Pola2"    | 3.924584    | 3.8422008  | 4.5081744   | 4.7305617   | 3.8588872   | 4.5539804   | 5.0946183   | 5.054332    |
| "Polb"     | 7.0658891   | 7.0244975  | 6.691903567 | 7.153639667 | 6.710039733 | 7.184395633 | 7.012505767 | 6.599227833 |
| "Pold1"    | 3.60455     | 3.565426   | 3.8375467   | 3.5349494   | 3.5771527   | 3.73349115  | 3.55273785  | 3.63096015  |
| "Pold2"    | 4.4233165   | 4.379511   | 5.386226    | 4.9882045   | 3.8110774   | 3.6779916   | 5.035904    | 5.7025766   |
| "Pold3"    | 5.6243013   | 4.8750934  | 5.41163025  | 5.03975415  | 5.00619785  | 5.09705435  | 5.14992815  | 5.03457015  |
| "Pold4"    | 7.9261065   | 7.892929   | 7.517278    | 6.956495    | 6.9210343   | 7.3532166   | 6.725859    | 6.601682    |
| "Poldip2"  | 7.6856587   | 8.4315035  | 8.23234715  | 8.20094525  | 8.6829215   | 8.295145    | 8.26108265  | 8.378915    |
| "Poldip3"  | 7.81856892  | 8.10814446 | 7.77970252  | 7.9097134   | 7.8139553   | 7.76124588  | 7.86151824  | 7.72957792  |
| "Pole"     | 2.373013    | 2.2034054  | 2.5557394   | 2.8103585   | 2.3218231   | 2.3181515   | 2.6966257   | 3.1282601   |
| "Pole2"    | 3.5387836   | 3.4931087  | 4.757491    | 3.6678767   | 3.5309439   | 3.5241783   | 3.9623835   | 3.6315124   |
| "Pole3"    | 5.7821605   | 5.5052984  | 5.2126732   | 5.1706685   | 5.00057465  | 4.8380357   | 5.2597635   | 5.0896527   |
| "Pole4"    | 7.9859655   | 8.72769435 | 7.2731385   | 7.1661195   | 7.61698815  | 8.362156    | 6.7780507   | 6.5900285   |
| "Polg"     | 4.7536491   | 4.5494321  | 4.723911    | 4.8295134   | 4.6979719   | 4.9084629   | 4.893404233 | 4.831990567 |
| "Polg2"    | 6.500939    | 7.5302563  | 6.956993    | 7.7075047   | 7.584877    | 7.4904156   | 7.1876564   | 7.7006564   |
| "Polh"     | 3.2936223   | 3.3656688  | 3.3716757   | 3.5966043   | 3.4208963   | 4.384649    | 3.8511817   | 4.0926356   |
| "Poli"     | 3.5700722   | 4.4034104  | 4.207104    | 4.2075286   | 3.9388626   | 4.417893    | 4.2310395   | 4.880087    |
| "Polk"     | 3.82154045  | 3.8661381  | 4.2441113   | 4.1204373   | 4.18489315  | 4.4595294   | 4.35791475  | 4.1512398   |
| "PolI"     | 3.439916    | 3.2674022  | 3.222793    | 3.2315402   | 3.3228521   | 3.4759789   | 3.5047958   | 3.012848    |
| "Polr1a"   | 4.090010467 | 4.381837   | 4.019769    | 4.0160148   | 4.159710967 | 4.394180767 | 3.8526326   | 4.092842133 |
| "Polr1b"   | 4.9912796   | 3.5573044  | 3.4829483   | 3.4993153   | 3.5767527   | 3.9842038   | 3.581343    | 3.5624218   |
| "Polr1c"   | 8.940882    | 8.7966975  | 8.1189155   | 7.94740835  | 8.2826998   | 8.8683325   | 8.0425135   | 8.207093    |
| "Polr1d"   | 10.2942425  | 10.2392895 | 9.4811275   | 9.44330925  | 9.680106    | 10.1738085  | 9.247717    | 9.5008405   |
| "Polr1e"   | 4.6222445   | 4.674322   | 4.51052615  | 4.2002805   | 4.7559852   | 4.69813965  | 4.3539071   | 4.16720815  |
| "Polr2a"   | 6.6931705   | 6.8754034  | 6.552251    | 6.9149637   | 6.8739524   | 7.000909    | 6.45215     | 6.3887606   |
| "Polr2b"   | 9.585316    | 9.924007   | 9.7154255   | 9.858526    | 10.017101   | 10.051916   | 9.805       | 10.0230665  |
| "Polr2c"   | 9.397685    | 8.935183   | 8.512139    | 8.774796    | 8.777478    | 9.241158    | 8.696582    | 8.915988    |
| "Polr2d"   | 6.5658393   | 6.299917   | 6.606016    | 6.254603    | 6.315748    | 6.0146627   | 6.317654    | 6.283753    |
| "Polr2e"   | 5.6883265   | 5.779158   | 5.54844715  | 5.52299805  | 5.4162958   | 5.61964375  | 5.4350879   | 5.5450605   |
| "Polr2f"   | 5.6398864   | 5.85597225 | 5.7626454   | 5.79792005  | 5.74824645  | 5.7112635   | 5.7857706   | 5.7130096   |
| "Polr2g"   | 8.28681     | 8.186108   | 8.759225    | 8.717203    | 7.9516983   | 8.037653    | 7.9872127   | 7.9843035   |
| "Polr2i"   | 9.164208    | 9.739697   | 9.190367    | 9.273635    | 9.570916    | 9.443319    | 9.333193    | 9.475746    |
| "Polr2j"   | 8.189573    | 8.303637   | 7.96597     | 8.227669    | 8.061499    | 8.086761    | 8.18905     | 8.092849    |
| "Polr2l"   | 10.090136   | 10.59913   | 10.74158    | 10.856262   | 10.704141   | 10.095232   | 10.296582   | 10.449046   |
| "Polr2m"   | 9.250767    | 9.262753   | 8.748096    | 8.849349    | 9.307055    | 9.17746     | 8.937636    | 9.205111    |
| "Polr3a"   | 6.6183028   | 6.87506975 | 6.7487805   | 7.0943835   | 6.824838    | 6.8471288   | 7.109313    | 7.14288285  |
| "Polr3c"   | 5.00119045  | 4.9025513  | 4.7959226   | 4.66945695  | 4.7206455   | 4.972695    | 4.81558225  | 4.8426336   |
| "Polr3d"   | 5.073228    | 3.2374125  | 3.839879    | 3.1520848   | 3.1877217   | 3.1779587   | 2.7302856   | 3.140873    |
| "Polr3e"   | 4.387502    | 4.5517423  | 4.19148035  | 4.0739763   | 4.37256465  | 4.6270155   | 4.26188835  | 4.28703725  |
| "Polr3f"   | 4.6779247   | 4.345906   | 3.9622079   | 4.1467008   | 4.4699781   | 4.3933104   | 4.17293195  | 4.38618925  |
| "Polr3g"   | 5.64211     | 6.119666   | 5.1160097   | 5.9017987   | 6.027984    | 5.429493    | 6.3009715   | 5.967335    |
| "Polr3gl"  | 5.299887    | 5.2296824  | 5.012851    | 5.314648    | 5.468696    | 5.376722    | 5.301229    | 5.2711053   |
| "Polr3h"   | 4.09116195  | 4.1057712  | 4.08084595  | 4.14936795  | 4.11690375  | 4.2078982   | 4.18496     | 4.2342976   |
| "Polr3k"   | 5.11930052  | 5.08884798 | 5.49221952  | 5.6509299   | 5.0182988   | 5.0233187   | 5.6204145   | 5.49389744  |
| "Polrmt"   | 6.621448    | 7.1555226  | 6.4880105   | 6.5090151   | 6.7762763   | 7.5698765   | 6.7353515   | 6.58163835  |
| "Pom121"   | 7.6790585   | 7.2294353  | 7.24500615  | 6.908053    | 7.3015815   | 7.3582993   | 6.9628393   | 7.1468895   |
| "Pomc"     | 2.9485617   | 2.9185934  | 2.8678837   | 2.891813    | 2.9387672   | 2.9339645   | 2.9363146   | 2.9371371   |
| "Pomgnt1"  | 6.6428223   | 6.6770105  | 6.5471296   | 6.6486754   | 6.5463247   | 6.8565464   | 6.5293007   | 6.482788    |
| "Pomp"     | 10.429615   | 10.789824  | 11.301897   | 11.346155   | 10.896014   | 10.745936   | 11.12988    | 11.133709   |
| "Pomt1"    | 4.066544    | 4.5197735  | 4.8943458   | 5.139483    | 5.4033065   | 4.2544694   | 5.7111077   | 4.8043075   |
| "Pomt2"    | 3.7337134   | 3.8442883  | 4.138496    | 3.6834903   | 3.719999    | 3.484824    | 3.725224    | 3.7068431   |
| "Pon1"     | 13.350661   | 13.904469  | 13.842446   | 14.106222   | 14.392255   | 13.771655   | 14.217708   | 14.06834    |
| "Pon2"     | 9.649197    | 9.520761   | 9.226059    | 9.223837    | 9.437447    | 9.5050125   | 9.089269    | 9.394983    |
| "Pon3"     | 7.7719145   | 7.8876843  | 8.16002     | 7.957299    | 8.288455    | 8.203752    | 8.2161255   | 8.372431    |
| "Pop4"     | 7.1029644   | 6.806622   | 6.769361    | 7.153987    | 6.0776916   | 6.7564597   | 7.0788136   | 6.839153    |
| "Pop5"     | 5.82309605  | 6.17053435 | 5.92909085  | 5.98945     | 6.0137423   | 5.99744445  | 5.9348142   | 6.0331815   |
| "Pop7"     | 5.4811826   | 5.8691716  | 6.156998    | 5.5104613   | 5.780592    | 5.8276553   | 5.8731365   | 5.492403    |
| "Popdc3"   | 2.343752    | 2.318375   | 2.2852      | 2.561021    | 2.3374815   | 2.3733842   | 2.3397965   | 2.3910396   |
| "Por"      | 11.432432   | 11.463709  | 9.705154    | 10.040524   | 11.291366   | 11.991437   | 9.740165    | 10.587739   |
| "Porcn"    | 2.447845    | 2.6014056  | 2.2438362   | 2.264632    | 2.3225794   | 2.5462732   | 2.319995    | 2.3040752   |
| "Postn"    | 7.1099253   | 6.9158683  | 7.810841    | 6.659819    | 6.7412643   | 7.352765    | 7.3598223   | 5.688177    |
| "Pot1a"    | 5.281911    | 6.127681   | 6.4657574   | 6.632022    | 6.1884966   | 6.4890184   | 6.4915934   | 6.1106167   |
| "Pou2af1"  | 2.5605595   | 2.5417612  | 4.0509763   | 2.575393    | 2.600915    | 2.5551195   | 3.5033214   | 2.5814564   |
| "Pou2f1"   | 3.84331915  | 4.4384612  | 4.075684    | 4.1574315   | 4.1114105   | 4.21154285  | 4.32552485  | 4.27330505  |
| "Pou3f1"   | 2.5311668   | 2.5449243  | 2.4130008   | 2.453064    | 2.5285745   | 2.5257428   | 2.5094385   | 2.52156     |
| "Pou4f3"   | 2.634159    | 2.6071353  | 2.5559247   | 2.571883    | 2.6276755   | 2.6251893   | 2.6293128   | 2.6188178   |
| "Pou5f1"   | 2.377393    | 2.3489976  | 2.3100371   | 2.341162    | 2.372681    | 2.367704    | 2.368261    | 2.360865    |
| "Pou6f1"   | 5.919346    | 6.6865635  | 5.8289833   | 5.6184044   | 5.6868343   | 5.9177165   | 5.8670483   | 5.979046    |
| "Ppa1"     | 11.128327   | 11.691334  | 11.986111   | 11.411319   | 11.369942   | 11.580351   | 11.506574   | 11.326455   |
| "Ppa2"     | 8.790591    | 9.273085   | 9.002423    | 9.278354    | 9.151825    | 9.050138    | 9.513327    | 9.669115    |
| "Ppan"     | 7.1103563   | 6.103562   | 5.9216027   | 5.684716    | 6.494682    | 6.1094794   | 5.7251115   | 5.7078      |
| "Ppap2a"   | 7.2289506   | 6.7232888  | 6.798604667 | 6.694355    | 6.513141067 | 6.376956667 | 6.8700958   | 6.334709067 |
| "Ppap2b"   | 10.0888125  | 10.436971  | 10.21422    | 10.66267    | 10.8050795  | 10.08453    | 10.9889805  | 10.5372795  |
| "Ppap2c"   | 9.016891    | 8.839812   | 9.229649    | 8.6801405   | 8.620025    | 8.949775    | 8.352918    | 8.6023855   |
| "Ppara"    | 7.786085    | 9.703281   | 8.856106    | 9.770031    | 10.4421215  | 9.908525    | 9.983107    | 10.491248   |
| "Pparg"    | 5.062846    | 5.048901   | 6.285516    | 5.057564    | 5.513317    | 4.394209    | 6.5193424   | 5.0265284   |
| "Ppargc1a" | 9.4952944   | 7.1996786  | 6.67575     | 5.84045364  | 6.481542    | 7.55588014  | 6.53217356  | 6.47784182  |
| "Ppargc1b" | 6.991419    | 7.442024   | 6.2012506   | 7.829343    | 7.508602    | 7.88669     | 7.3075852   | 8.732067    |
| "Ppat"     | 7.4335867   | 6.814483   | 6.21361085  | 6.79086765  | 6.7904391   | 6.56098235  | 6.38350375  | 6.97662285  |
| "Ppbb"     | 4.990228    | 2.1761227  | 4.601471    | 4.942544    | 4.920809    | 5.828227    | 4.456327    | 2.5992758   |

|            |             |             |             |             |             |             |             |             |
|------------|-------------|-------------|-------------|-------------|-------------|-------------|-------------|-------------|
| "Ppcdc"    | 3.9874637   | 4.165936    | 4.46821485  | 4.5007987   | 4.5517634   | 4.6495728   | 4.6947561   | 4.5796527   |
| "Ppcs"     | 6.942985    | 7.725427    | 7.199748    | 7.408002    | 7.904875    | 7.652861    | 7.5375724   | 7.6927447   |
| "Ppdpf"    | 9.03055     | 9.708421    | 9.432837    | 9.507937    | 9.57439     | 9.565096    | 9.620299    | 9.855566    |
| "Ppef2"    | 2.569381    | 2.5454724   | 2.5153928   | 2.4900155   | 2.5698485   | 2.559084    | 2.5462599   | 2.5561404   |
| "Ppfia4"   | 3.4506981   | 3.3671715   | 3.7563617   | 3.69613     | 3.708444    | 3.410688    | 3.368142    | 3.826474    |
| "Ppfbp2"   | 7.148709    | 7.717078    | 7.329944    | 7.982435    | 7.1238074   | 7.408371    | 7.0833306   | 6.824006    |
| "Ppia"     | 13.503183   | 13.721775   | 13.805178   | 13.675863   | 13.459601   | 13.433172   | 13.711522   | 13.7731495  |
| "Ppib"     | 11.326049   | 11.5973515  | 12.278036   | 12.104504   | 12.1238525  | 11.7624735  | 12.254667   | 12.408164   |
| "Ppic"     | 6.2542977   | 5.523719    | 6.7026763   | 6.502078    | 5.9296246   | 5.5558662   | 6.345972    | 5.7688704   |
| "Ppie"     | 5.7868257   | 5.7747188   | 6.1385446   | 5.3924217   | 5.7783265   | 5.747358    | 5.7371583   | 5.932064    |
| "Ppif"     | 6.1682402   | 6.437659    | 6.34525175  | 6.0920503   | 6.30878615  | 6.21555165  | 6.1328408   | 6.15925     |
| "Ppig"     | 8.6912325   | 8.7455335   | 8.0701925   | 8.3061525   | 8.474886    | 8.50265175  | 8.35794485  | 8.23126835  |
| "Ppil2"    | 6.7868185   | 6.9221606   | 7.15406     | 6.9954004   | 6.9635763   | 6.867042    | 6.94658     | 6.997371    |
| "Ppil4"    | 8.316735    | 7.8951993   | 7.8253703   | 8.037647    | 8.20795     | 8.232717    | 7.774413    | 7.828036    |
| "Ppi"      | 3.3444314   | 2.9848216   | 3.7043853   | 4.208951    | 3.1935124   | 2.7461815   | 3.4594774   | 5.2124043   |
| "Ppm1a"    | 6.6597265   | 6.88850585  | 6.6458129   | 6.83237025  | 6.8098585   | 6.916617325 | 6.908555425 | 6.79333985  |
| "Ppm1b"    | 9.018330967 | 8.805015433 | 8.941149333 | 9.368704167 | 9.183176467 | 9.3052015   | 9.507687    | 9.519362    |
| "Ppm1d"    | 4.5587497   | 4.9403057   | 4.1010513   | 4.2237267   | 4.6796756   | 5.0577965   | 4.3174386   | 4.299556    |
| "Ppm1g"    | 7.151168    | 7.274548    | 6.701989    | 6.578152    | 7.146038    | 7.4699564   | 6.6326094   | 6.9643145   |
| "Ppm1m"    | 6.827133    | 6.9864616   | 7.2432427   | 7.0859356   | 6.848367    | 7.4383554   | 7.2664294   | 7.217627    |
| "Ppme1"    | 6.044518    | 5.9515004   | 5.783221    | 5.9182296   | 5.9432125   | 6.1646333   | 5.860801    | 5.930432    |
| "Ppnr"     | 3.5227408   | 5.1664853   | 5.006572    | 5.2210245   | 5.21679     | 5.2793765   | 5.212807    | 5.166253    |
| "Ppox"     | 3.4921038   | 3.6999319   | 3.8158357   | 3.86737445  | 3.7956879   | 3.73223475  | 3.99963605  | 3.87034525  |
| "Ppp1ca"   | 10.5973     | 11.370607   | 11.308434   | 11.275206   | 11.207956   | 11.130361   | 11.482905   | 11.162754   |
| "Ppp1cb"   | 9.821037    | 9.384048667 | 9.219763767 | 9.180888833 | 9.328153133 | 9.487318333 | 9.661281    | 9.345422333 |
| "Ppp1cc"   | 9.7888167   | 10.0024115  | 9.727265    | 9.787096    | 9.8936188   | 9.7367925   | 9.559317    | 9.6109277   |
| "Ppp1r11"  | 5.6136358   | 5.7632375   | 5.843179    | 5.92016145  | 5.5435232   | 5.8095505   | 6.20782235  | 5.73946175  |
| "Ppp1r12c" | 2.6442938   | 2.6849313   | 2.6021218   | 2.594865    | 2.6279502   | 2.6202006   | 2.6328192   | 2.616975    |
| "Ppp1r14a" | 4.4956603   | 4.372659    | 3.6356754   | 6.5876617   | 3.5785806   | 4.1731877   | 4.1511726   | 5.683399    |
| "Ppp1r14b" | 8.293724    | 9.287585    | 8.509359    | 7.846742    | 8.910413    | 8.342794    | 7.8046002   | 8.199613    |
| "Ppp1r15a" | 8.641602    | 6.042271    | 5.596809    | 5.5545597   | 5.760178    | 6.1218433   | 5.527458    | 5.9217243   |
| "Ppp1r15b" | 6.7237946   | 6.67354155  | 6.541093    | 6.692745    | 6.8693735   | 6.933079    | 6.7246144   | 6.9472445   |
| "Ppp1r17"  | 2.9997244   | 2.9839497   | 2.9535599   | 2.8918304   | 3.0032313   | 3.0078497   | 2.9501534   | 3.0093465   |
| "Ppp1r18"  | 5.5306053   | 4.696005    | 5.853884    | 4.934449    | 5.2851562   | 5.0688844   | 5.0820565   | 5.0352726   |
| "Ppp1r2"   | 6.497772067 | 6.6472009   | 5.937076333 | 6.101368867 | 6.330775    | 6.431932067 | 6.120856933 | 6.312221633 |
| "Ppp1r37"  | 8.054975    | 8.194799    | 8.176498    | 8.337883    | 8.396007    | 8.255224    | 8.177964    | 8.38462     |
| "Ppp1r3a"  | 2.5274878   | 2.4942465   | 2.443395    | 2.461828    | 2.5178013   | 2.5109668   | 2.5159059   | 2.5242677   |
| "Ppp1r3c"  | 4.62561205  | 9.161323    | 6.7045855   | 6.2483461   | 7.48412315  | 6.86030695  | 6.68579915  | 6.15146025  |
| "Ppp1r42"  | 2.93441115  | 2.9282973   | 3.10986675  | 2.85157525  | 2.95658015  | 3.03328975  | 2.9216051   | 2.94120635  |
| "Ppp1r7"   | 6.9582337   | 7.46311545  | 7.4437465   | 7.4550832   | 7.3165965   | 7.201747    | 7.398587    | 7.21528975  |
| "Ppp1r8"   | 5.26979235  | 5.18472455  | 5.28377795  | 5.13719835  | 5.16704365  | 4.98629835  | 5.308088    | 5.2301665   |
| "Ppp2ca"   | 10.452479   | 10.463082   | 9.9076625   | 9.9259395   | 10.255178   | 10.1775395  | 10.0082905  | 9.9458195   |
| "Ppp2cb"   | 5.9567975   | 5.9315965   | 5.56519585  | 5.5390507   | 5.6712958   | 5.98399075  | 5.5908043   | 5.7025775   |
| "Ppp2r1a"  | 8.8527974   | 9.21007454  | 8.93279314  | 8.7143348   | 8.71516684  | 8.58973922  | 8.59818416  | 8.64183816  |
| "Ppp2r1b"  | 8.207416    | 8.306544    | 8.382482    | 7.9538584   | 8.543522    | 8.567591    | 8.821163    | 8.221703    |
| "Ppp2r2a"  | 5.8450083   | 6.000633167 | 5.6516886   | 5.6099011   | 6.010523833 | 5.8803898   | 5.853436667 | 5.856155567 |
| "Ppp2r2d"  | 6.322884067 | 6.588000767 | 5.433814167 | 5.963895433 | 6.322385267 | 6.820433067 | 6.064806333 | 6.0419503   |
| "Ppp2r3c"  | 4.602066133 | 4.541289067 | 4.545255933 | 4.5470337   | 4.720959333 | 4.6081473   | 4.667097167 | 4.481748233 |
| "Ppp2r3d"  | 4.314204    | 4.3377047   | 4.1329703   | 3.9025214   | 3.7896552   | 3.8120258   | 3.8429348   | 3.9149215   |
| "Ppp2r4"   | 4.883703533 | 4.9869901   | 4.8567113   | 4.992395367 | 5.0034653   | 5.166717567 | 4.9792536   | 5.094460533 |
| "Ppp2r5a"  | 9.687284    | 9.88748     | 9.790075    | 10.369566   | 10.489209   | 10.167992   | 10.079994   | 10.253804   |
| "Ppp2r5b"  | 3.8140304   | 3.133988    | 2.4917662   | 2.5313122   | 2.8010101   | 3.1462634   | 2.5958552   | 2.5776472   |
| "Ppp2r5c"  | 5.6893843   | 5.614601917 | 5.507831783 | 5.539957367 | 5.792213467 | 5.768795367 | 5.696403233 | 5.683308433 |
| "Ppp2r5d"  | 3.5673213   | 4.3149157   | 4.191091    | 4.243851    | 4.2630973   | 4.3539815   | 4.304689    | 4.679692    |
| "Ppp3ca"   | 8.314178533 | 8.270951467 | 7.736527433 | 8.071474    | 8.211342233 | 8.124652433 | 8.001434    | 8.142807167 |
| "Ppp3cb"   | 5.35710035  | 5.75805365  | 5.8606754   | 5.95254715  | 5.6278767   | 5.95205585  | 6.2248115   | 5.9632923   |
| "Ppp3cc"   | 3.3060097   | 3.6002089   | 3.3304884   | 3.50576535  | 3.35337105  | 3.293019    | 3.33467625  | 3.5396682   |
| "Ppp3r1"   | 5.573367667 | 5.5593324   | 5.1768819   | 5.396803567 | 5.509606233 | 5.335565467 | 5.345052133 | 5.5501488   |
| "Ppp4c"    | 8.1831665   | 7.9473305   | 7.947759    | 7.7609897   | 7.8400187   | 8.061283    | 7.839677    | 7.920599    |
| "Ppp4r1"   | 8.644379    | 8.863348    | 8.286002    | 8.216228    | 8.204367    | 8.426265    | 8.081282    | 8.094057    |
| "Ppp4r2"   | 10.895038   | 10.553724   | 10.490083   | 10.407817   | 10.468559   | 10.773041   | 10.314738   | 10.495463   |
| "Ppp5c"    | 5.465693667 | 5.491664767 | 5.488774033 | 5.438564033 | 5.629321433 | 5.6393757   | 5.633277133 | 5.8543692   |
| "Ppp6c"    | 7.85998115  | 7.9626755   | 7.6063969   | 7.91544485  | 7.8656416   | 7.791868    | 7.8288419   | 8.04519845  |
| "Ppp6r2"   | 3.282956867 | 3.313932033 | 3.031869733 | 3.2361009   | 3.2851765   | 3.276512    | 3.242034367 | 3.397780167 |
| "Ppp6r3"   | 4.1786034   | 4.2607871   | 4.1674137   | 4.220435033 | 4.253965067 | 4.4011251   | 4.369523533 | 4.210007433 |
| "Pppde1"   | 8.2426819   | 7.874985    | 7.1136565   | 6.7930205   | 7.65591     | 7.806728    | 6.96460185  | 6.04592515  |
| "Pppde2"   | 7.8140085   | 7.930972    | 7.762284    | 7.796113    | 7.6492712   | 7.88616725  | 7.20908525  | 7.787154    |
| "Pprc1"    | 7.548088    | 6.54206     | 6.338749    | 6.0656724   | 7.098484    | 7.0354743   | 6.369632    | 6.798272    |
| "Ppt1"     | 7.09486675  | 6.7214785   | 7.612032    | 7.7038745   | 7.2310245   | 6.85960265  | 7.5194615   | 7.12700725  |
| "Ppt2"     | 7.955748    | 7.965703    | 7.706713    | 7.904189    | 7.8061438   | 7.799497    | 7.709621    | 7.920771    |
| "Pptc7"    | 11.176107   | 10.664714   | 8.86417     | 9.107414    | 9.715553    | 10.204348   | 8.90889     | 9.175039    |
| "Pqbp1"    | 8.1297325   | 8.68113375  | 7.62650565  | 7.7512329   | 7.643859    | 7.9459935   | 7.4683603   | 7.7554043   |
| "Pqlc1"    | 8.19033975  | 8.3252505   | 7.93691825  | 9.1120465   | 9.312624    | 9.0620685   | 9.3738055   | 9.74659625  |
| "Pqlc2"    | 6.2680826   | 6.765241    | 6.746218    | 5.7331      | 5.607275    | 6.4795923   | 5.849346    | 6.1936936   |
| "Pqlc3"    | 2.671177    | 2.643082    | 2.5879974   | 2.621464    | 2.6572804   | 2.6519554   | 2.6449025   | 2.6819386   |
| "Praf2"    | 2.8846078   | 2.851797    | 2.8760648   | 3.2478383   | 3.1076536   | 2.6338506   | 2.8730216   | 2.881465    |
| "Pramel1"  | 2.6982913   | 2.6708522   | 2.5945344   | 2.6286976   | 2.6932108   | 2.6886137   | 2.691318    | 2.6849058   |
| "Pramel6"  | 3.1455815   | 3.1517303   | 3.07313     | 3.10868435  | 3.25673715  | 3.1904408   | 3.05251515  | 3.29432775  |
| "Pramel7"  | 2.93103775  | 2.89784325  | 2.75910995  | 2.8947029   | 2.92292405  | 2.93335     | 2.92025525  | 2.93430195  |
| "Prap1"    | 2.4841235   | 2.4613292   | 2.4142785   | 2.5344446   | 2.4862492   | 2.483022    | 2.475766    | 2.4776418   |
| "Prc1"     | 3.07862935  | 3.07341755  | 3.06187655  | 3.00312415  | 3.09772835  | 3.1279563   | 3.19684265  | 3.1294029   |

|            |             |             |             |             |             |             |             |             |
|------------|-------------|-------------|-------------|-------------|-------------|-------------|-------------|-------------|
| "Prcc"     | 5.884389    | 5.7732677   | 5.6389327   | 5.7550526   | 6.0871224   | 5.956365    | 5.564985    | 5.656442    |
| "Prcp"     | 5.21568125  | 4.61439925  | 5.4191838   | 5.0720551   | 5.21928735  | 5.14452685  | 5.3105848   | 4.9989158   |
| "Prdm1"    | 2.3065112   | 2.2912986   | 3.354156    | 2.2799668   | 2.391978    | 2.3470707   | 2.320538    | 2.3238602   |
| "Prdm4"    | 5.572549    | 4.8657036   | 4.7128763   | 4.6631103   | 4.629644    | 4.4628544   | 4.462953    | 4.4757133   |
| "Prdm5"    | 2.428128    | 2.3876424   | 2.3530443   | 2.371539    | 2.5089054   | 2.4859953   | 2.4087536   | 2.3960774   |
| "Prdm9"    | 2.3637266   | 2.32998     | 2.315525    | 2.6871357   | 2.3194213   | 2.310084    | 2.3519132   | 2.430598    |
| "Prdx2"    | 8.83082175  | 9.0312477   | 8.7891715   | 9.3317105   | 8.95396675  | 8.63537425  | 8.9670492   | 9.1024205   |
| "Prdx3"    | 10.275821   | 10.696109   | 11.498501   | 11.04902    | 10.889528   | 10.410983   | 10.884479   | 10.65827    |
| "Prdx4"    | 9.429877    | 9.6566275   | 9.731793    | 9.858097    | 10.2233     | 10.229223   | 10.618334   | 10.263306   |
| "Prdx5"    | 10.298256   | 11.179414   | 10.6089945  | 10.741766   | 10.627775   | 10.7616005  | 10.531546   | 10.829119   |
| "Preb"     | 8.5044945   | 8.7704375   | 8.882544    | 8.3445005   | 9.481596    | 9.0606535   | 8.75665675  | 8.982133    |
| "Prelid1"  | 2.87568335  | 3.327065    | 3.13860785  | 3.1832842   | 3.35707495  | 3.20414265  | 3.24200405  | 3.3411236   |
| "Prelp"    | 5.89593465  | 4.69807785  | 6.3634418   | 5.3111556   | 5.2319936   | 5.3065339   | 5.366489    | 5.11799455  |
| "Prep"     | 5.528285    | 6.6476755   | 6.470796    | 6.1748114   | 6.900139    | 6.2987385   | 6.7318344   | 7.127759    |
| "Prepl"    | 5.2191739   | 5.450127    | 5.261703633 | 5.763909067 | 5.454901    | 5.196631767 | 5.774993433 | 5.3243489   |
| "Prg2"     | 2.3976932   | 2.3647113   | 2.2896461   | 2.356646    | 2.4410973   | 3.491438    | 2.3790681   | 2.3729286   |
| "Prg4"     | 10.612747   | 9.530514    | 11.058512   | 11.083414   | 10.180262   | 9.861656    | 10.557361   | 10.497073   |
| "Prickle1" | 5.8219266   | 5.375218    | 5.1799693   | 5.877783    | 5.8570585   | 4.6662655   | 5.8876705   | 5.2443256   |
| "Prickle4" | 9.4688607   | 9.94830125  | 9.894124    | 9.891085    | 9.5905765   | 9.5377525   | 9.6424325   | 9.849187    |
| "Prim1"    | 4.676075    | 3.89093455  | 5.004502    | 4.0066485   | 4.73923175  | 5.009629    | 5.60388415  | 4.48501985  |
| "Prim2"    | 3.69634245  | 3.62481265  | 3.9836279   | 3.70076825  | 3.43855945  | 3.86680795  | 4.5865066   | 3.9009678   |
| "Prkab1"   | 7.600022    | 7.3311224   | 7.7347393   | 7.50835     | 7.432604    | 7.4089746   | 7.72354     | 7.456151    |
| "Prkaca"   | 3.4814444   | 4.2166667   | 4.114299    | 4.4861736   | 4.0943823   | 3.9797552   | 4.1437473   | 4.2207255   |
| "Prkacb"   | 4.9815772   | 5.38874845  | 5.1651725   | 5.4776341   | 5.1735089   | 5.175696    | 5.4266301   | 5.2255181   |
| "Prkag1"   | 6.0402257   | 5.89027435  | 5.5259543   | 5.5365476   | 5.8656683   | 5.94732215  | 5.70878735  | 5.7449803   |
| "Prkag2"   | 5.1538974   | 5.4273324   | 4.724059467 | 5.530073467 | 5.232672733 | 5.128675033 | 6.0463938   | 4.909310867 |
| "Prkar1a"  | 10.686804   | 10.282341   | 10.1895695  | 10.0540385  | 10.0352535  | 10.2065315  | 10.32785175 | 10.24402625 |
| "Prkar1b"  | 3.0514128   | 3.0493436   | 2.8855143   | 3.0042782   | 3.1789465   | 3.1067002   | 3.0645375   | 3.106294    |
| "Prkca"    | 3.0629423   | 3.0246892   | 3.1954398   | 3.0006664   | 3.0726314   | 3.0462832   | 3.0616279   | 3.039257    |
| "Prkcb"    | 6.02816985  | 4.55968465  | 6.4924367   | 5.7695434   | 5.24669835  | 5.2051945   | 5.7813627   | 5.3981482   |
| "Prkcd"    | 6.59848     | 5.5152626   | 6.6104646   | 5.8733487   | 5.8292103   | 5.6406226   | 6.046811    | 5.922234    |
| "Prkce"    | 6.6980324   | 5.7267356   | 6.282762    | 6.123523    | 6.2754145   | 6.1277304   | 6.737745    | 6.0637126   |
| "Prkch"    | 3.4712372   | 2.794417    | 2.673291    | 2.8044283   | 2.8087177   | 2.8057702   | 2.796781    | 2.7994206   |
| "Prkci"    | 8.3309555   | 8.217771    | 8.410302    | 8.217053    | 8.306623    | 8.434442    | 8.383613    | 8.200871    |
| "Prkcq"    | 1.7202969   | 1.666774    | 1.6899313   | 2.4871995   | 1.6876566   | 1.6967294   | 1.698105    | 1.6984544   |
| "Prkchsh"  | 9.222857    | 9.399095    | 9.222102    | 9.357118    | 9.258419    | 9.487514    | 9.168125    | 9.327425    |
| "Prkcz"    | 3.32521115  | 4.21872735  | 3.25525125  | 4.11197695  | 3.5407511   | 3.9704958   | 3.490049    | 3.7568653   |
| "Prkd2"    | 3.96140182  | 3.68725996  | 4.4685398   | 4.29000268  | 3.91352558  | 3.9066675   | 4.33026132  | 3.73328488  |
| "Prkd3"    | 6.2030512   | 6.226624533 | 7.121235133 | 7.758447333 | 7.167406333 | 7.130566933 | 7.839116433 | 8.361938233 |
| "Prkdc"    | 4.0737524   | 4.847307    | 4.9032745   | 4.9090176   | 5.1486173   | 4.5734444   | 5.4394455   | 5.1423225   |
| "Prkg1"    | 2.4302902   | 2.3679948   | 2.3079832   | 2.3518996   | 2.4095488   | 2.4067855   | 2.398233    | 2.3771853   |
| "Prkg2"    | 2.5418973   | 2.4974852   | 2.4762242   | 2.4761667   | 2.5268855   | 2.5322416   | 2.5178137   | 2.5147004   |
| "Prkra"    | 7.736033    | 8.071307    | 8.056415    | 8.309812    | 7.508097    | 7.8813105   | 8.099034    | 8.082483    |
| "Prkrip1"  | 6.200043    | 5.972809    | 5.061365    | 5.4982343   | 5.093511    | 5.7683115   | 5.560323    | 5.433103    |
| "Prkrir"   | 7.898588    | 8.22701     | 7.4585033   | 7.5868392   | 8.402754    | 7.96827215  | 7.90807235  | 7.7831315   |
| "Prkx"     | 5.1858016   | 4.432964633 | 4.913492233 | 4.4073804   | 4.644488967 | 4.3087521   | 4.807820167 | 4.6455702   |
| "Pri"      | 2.6025033   | 2.5861359   | 2.4922917   | 2.564441    | 2.618922    | 2.631523    | 2.5650847   | 2.632312    |
| "Pri2b1"   | 2.752203    | 2.77924165  | 2.63262575  | 2.67043185  | 2.80366575  | 2.77289535  | 2.7310703   | 2.7613024   |
| "Pri2c2"   | 2.435554    | 2.407106    | 2.3578186   | 2.3957405   | 2.4315577   | 2.4286766   | 2.4019988   | 2.4171777   |
| "Pri3b1"   | 2.748555    | 2.722093    | 2.640019    | 2.6739163   | 2.7498355   | 2.7433095   | 2.7173977   | 2.748896    |
| "Pri3d1"   | 2.93659735  | 2.91633115  | 2.7811477   | 2.88443995  | 3.0470333   | 3.0258477   | 2.90978075  | 2.96837125  |
| "Pri5a1"   | 2.4395037   | 2.4085944   | 2.334368    | 2.3685892   | 2.4370742   | 2.434428    | 2.4255419   | 2.4293995   |
| "Pri6a1"   | 2.5653026   | 2.5562575   | 2.4862478   | 2.5133672   | 2.5709405   | 2.5727713   | 2.5490675   | 2.585653    |
| "Pri7a1"   | 3.002555    | 2.998877    | 2.844179    | 2.9096735   | 3.0706508   | 3.0719109   | 2.9747775   | 3.0857925   |
| "Pri7a2"   | 2.624203    | 2.598167    | 2.5154634   | 2.5517259   | 2.6305351   | 2.6295183   | 2.6077569   | 2.6333575   |
| "Pri7d1"   | 2.614664    | 2.5926685   | 2.5162904   | 2.5508287   | 2.617171    | 2.618446    | 2.5931056   | 2.614343    |
| "Pri8a6"   | 2.8960874   | 2.8823335   | 2.7425966   | 2.8225775   | 2.9274707   | 2.9275763   | 2.8612874   | 2.92872     |
| "Pri8a8"   | 2.4450355   | 2.4142773   | 2.3467703   | 2.359525    | 2.4340262   | 2.4253273   | 2.436961    | 2.419478    |
| "Prlr"     | 6.6229969   | 6.1493883   | 7.10040698  | 7.3775413   | 6.97502808  | 6.34307756  | 7.70001378  | 6.04451498  |
| "Prm1"     | 3.390897667 | 3.4439478   | 3.139360067 | 3.289135233 | 3.429240867 | 3.4357723   | 3.3666457   | 3.478383633 |
| "Prm2"     | 2.4690952   | 2.4315267   | 2.4060376   | 2.4024625   | 2.4568002   | 2.4448507   | 2.4532175   | 2.4385264   |
| "Prm3"     | 2.6470802   | 2.6212711   | 2.5202467   | 2.598197    | 2.6549394   | 2.6529114   | 2.6353455   | 2.6389623   |
| "Prmt1"    | 8.1804905   | 8.074523    | 7.7639685   | 7.1335874   | 7.6916924   | 7.833278    | 7.457133    | 7.5086637   |
| "Prmt2"    | 3.17391615  | 3.09478785  | 3.7114323   | 3.6095611   | 3.20201015  | 3.1884861   | 3.2533935   | 3.2246377   |
| "Prmt3"    | 5.06391035  | 5.24194685  | 5.02598395  | 4.8216813   | 5.22102965  | 5.55116495  | 5.04791255  | 5.09371185  |
| "Prmt5"    | 5.0569644   | 4.517359    | 4.5571795   | 4.323881    | 4.5828953   | 4.7579      | 4.4807835   | 4.6490636   |
| "Prmt6"    | 5.1140027   | 4.869857    | 4.516981    | 3.8962612   | 3.6299522   | 4.0108714   | 4.004086    | 3.637316    |
| "Prmt7"    | 4.3493159   | 4.27745655  | 4.33443485  | 4.115658    | 4.43753065  | 4.4411841   | 4.2338214   | 4.2577075   |
| "Prnp"     | 6.820647    | 7.071797    | 8.1248692   | 8.72186685  | 7.5482993   | 6.517792    | 7.746425    | 7.6288025   |
| "Proc"     | 12.556613   | 12.669279   | 12.692298   | 12.8397255  | 12.934761   | 12.986022   | 12.810316   | 13.139744   |
| "Procr"    | 7.1669936   | 6.182314    | 6.755828    | 6.3221874   | 5.963843    | 5.605844    | 6.1658483   | 6.3003755   |
| "Prodh"    | 9.988011    | 11.008093   | 10.35158    | 11.140576   | 11.279727   | 11.057686   | 11.175194   | 10.785393   |
| "Prodh2"   | 8.895491    | 9.6105995   | 8.939855    | 9.519821    | 9.801189    | 9.232073    | 9.648254    | 9.753246    |
| "Prok2"    | 2.5187055   | 2.4953159   | 2.41691885  | 2.46159495  | 2.5646394   | 2.51488055  | 2.4850841   | 2.551995    |
| "Prokr1"   | 2.8840098   | 2.5704312   | 2.4880862   | 2.500571    | 2.6269262   | 2.5901794   | 2.5824132   | 2.6290557   |
| "Prol1"    | 2.57777465  | 2.55124045  | 2.48801625  | 2.50188905  | 2.6101246   | 2.6092615   | 2.5623007   | 2.5673845   |
| "Prom1"    | 3.2241921   | 3.2759025   | 5.320697    | 3.7005396   | 3.400652    | 3.2891564   | 4.4826345   | 3.9409192   |
| "Prom2"    | 2.4933944   | 2.4670987   | 2.4192705   | 2.4419827   | 2.4851897   | 2.474705    | 2.4851956   | 2.4772937   |
| "Prop1"    | 2.6778133   | 2.5795317   | 2.4168944   | 2.5727746   | 2.6053398   | 2.6077015   | 2.5883164   | 2.6046596   |
| "Prosl"    | 10.716986   | 10.160441   | 10.503795   | 10.455528   | 9.5596      | 10.113009   | 9.498254    | 9.925627    |
| "Prosc"    | 9.945559    | 10.464968   | 9.728181    | 10.225311   | 10.124704   | 10.019832   | 9.801092    | 10.0144415  |

|           |             |             |             |             |             |             |             |             |
|-----------|-------------|-------------|-------------|-------------|-------------|-------------|-------------|-------------|
| "Prox1"   | 2.4439197   | 2.4256895   | 2.4693968   | 2.361157    | 2.8052106   | 2.4623122   | 2.8258486   | 2.3104935   |
| "Proz"    | 9.132307    | 9.67908185  | 9.764144    | 9.84357385  | 9.7153627   | 9.32207935  | 9.7892882   | 10.023504   |
| "Prp2"    | 2.800382    | 2.7898533   | 2.7268677   | 2.7454093   | 2.879338    | 2.8807652   | 2.779831    | 2.9019527   |
| "Prpf19"  | 9.926823    | 10.0298055  | 9.759117333 | 9.942651333 | 9.837159    | 9.528943    | 9.493816333 | 10.03287667 |
| "Prpf3"   | 5.391348    | 5.2093773   | 5.417465    | 5.075066    | 6.1794114   | 5.4719133   | 5.4721556   | 5.5595293   |
| "Prpf31"  | 3.83871055  | 3.78473215  | 4.2047046   | 3.71632635  | 3.76359395  | 3.5602221   | 3.7687123   | 3.7420373   |
| "Prpf38a" | 7.238735    | 7.244723    | 7.316699    | 7.096235    | 7.06388     | 7.231431    | 7.0967345   | 6.8116713   |
| "Prpf38b" | 7.8448893   | 8.2348465   | 8.183569    | 8.2759895   | 8.361531    | 8.397758    | 8.32968725  | 8.2761255   |
| "Prpf39"  | 6.746001467 | 6.282133233 | 6.1091842   | 6.266055767 | 6.599092667 | 6.632418433 | 6.292447233 | 6.3315123   |
| "Prpf40a" | 7.731754667 | 7.5451135   | 7.836478    | 7.777985767 | 7.529354333 | 7.615597    | 7.5631163   | 7.740791667 |
| "Prpf40b" | 5.1497765   | 5.0275283   | 5.154322    | 5.3278313   | 5.10602     | 5.1039743   | 5.3576345   | 5.134268    |
| "Prpf4b"  | 6.1252439   | 6.342838867 | 6.367842933 | 6.271084017 | 6.7172712   | 6.784574883 | 6.57212675  | 6.627694917 |
| "Prpf6"   | 7.003176567 | 6.986104333 | 6.269759    | 6.269151967 | 6.425397567 | 6.476212933 | 6.3045537   | 6.688205667 |
| "Prpf8"   | 8.427404    | 8.363912    | 8.643035    | 8.629333    | 8.667283    | 8.513357    | 8.881503    | 8.80818     |
| "Prph"    | 3.2984583   | 3.2874787   | 3.2235775   | 3.2793312   | 3.4879675   | 3.307537    | 3.1990142   | 3.325504    |
| "Prpmp5"  | 2.9547668   | 2.930972    | 2.7579114   | 2.870739    | 2.9508543   | 2.9524844   | 2.9341216   | 2.9509315   |
| "Prps1"   | 8.4468173   | 7.74619605  | 7.950023    | 7.96072465  | 7.88390675  | 7.8037795   | 8.0988365   | 7.8383125   |
| "Prps1l3" | 8.7066465   | 8.867728    | 8.5662425   | 8.584278    | 8.570894    | 8.87723425  | 8.8240245   | 8.727108    |
| "Prps2"   | 3.1102382   | 3.0636539   | 3.12670865  | 3.03938905  | 3.12495275  | 3.0807889   | 3.7229672   | 3.1662436   |
| "Prpsap1" | 9.321089    | 9.859388    | 9.524233    | 9.873767    | 9.803322    | 10.127638   | 9.78413     | 9.981282    |
| "Prpsap2" | 5.466035    | 6.0927367   | 6.203022    | 6.4211555   | 5.5983496   | 5.6612387   | 6.1281533   | 5.8192124   |
| "Prr12"   | 3.1733148   | 2.9542124   | 3.1968362   | 3.207694    | 3.2212698   | 3.2147293   | 3.2232845   | 3.2267919   |
| "Prr13"   | 10.100206   | 9.567995    | 10.256649   | 10.190165   | 9.480997    | 9.608768    | 10.166121   | 9.814531    |
| "Prr14"   | 8.19377     | 8.390271    | 8.13256     | 8.279044    | 8.630598    | 8.40721     | 8.23841     | 8.460533    |
| "Prr15"   | 2.9925814   | 2.733985    | 3.7171416   | 2.6697197   | 3.1948307   | 2.6312063   | 2.7880044   | 2.7307107   |
| "Prr3"    | 3.7604468   | 2.8102272   | 2.517222    | 2.6930857   | 3.413948    | 2.6453269   | 2.5620046   | 2.6620698   |
| "Prrc1"   | 7.078045    | 7.984039    | 6.9827313   | 7.0342526   | 7.890337    | 7.573881    | 6.9610605   | 7.243044    |
| "Prrc2a"  | 3.83207585  | 3.8265281   | 3.81371315  | 3.70883145  | 3.95300575  | 3.79378385  | 3.83013305  | 3.84522315  |
| "Prrg2"   | 6.7751875   | 7.4100356   | 6.981461    | 7.3691173   | 7.346721    | 7.530057    | 7.358224    | 7.434038    |
| "Prrt1"   | 2.3851044   | 2.5759048   | 2.5847545   | 2.5998993   | 2.612569    | 2.6056561   | 2.6161966   | 3.0117588   |
| "Prrx1"   | 2.492616867 | 2.482909133 | 2.423452933 | 2.824356833 | 2.741656333 | 2.497886333 | 2.6073542   | 2.4954251   |
| "Prss12"  | 2.5993586   | 2.5660636   | 2.8298163   | 2.5450077   | 2.5967555   | 2.57022     | 2.575723    | 2.5778658   |
| "Prss2"   | 3.0719471   | 3.06320615  | 2.9036799   | 2.979289175 | 3.273045025 | 3.1699222   | 3.009555    | 3.06563015  |
| "Prss21"  | 2.7680068   | 2.7389808   | 2.657413    | 2.7104294   | 2.7653298   | 2.7776964   | 2.753428    | 2.7674618   |
| "Prss22"  | 2.309911    | 2.2838123   | 2.2195134   | 2.2669017   | 2.5664573   | 2.3086216   | 2.3039584   | 2.30547     |
| "Prss23"  | 5.82105225  | 4.6033403   | 4.58783935  | 4.90263     | 4.90517115  | 4.62734695  | 5.24343395  | 4.47605965  |
| "Prss29"  | 2.42408     | 2.3954194   | 2.3539808   | 2.4692228   | 2.4152658   | 2.4090385   | 2.417568    | 2.4134343   |
| "Prss3"   | 2.530272    | 2.5057204   | 2.4381876   | 2.4584572   | 2.5288465   | 2.5250614   | 2.5226092   | 2.5183034   |
| "Prss35"  | 2.8397975   | 2.847117    | 2.7087765   | 2.7616224   | 2.8827047   | 2.8830862   | 2.8229213   | 2.881514    |
| "Prss39"  | 2.558716    | 2.5404472   | 2.4720666   | 2.478805    | 2.5626945   | 2.5616655   | 2.5685372   | 2.550802    |
| "Prss40"  | 2.768496    | 2.760663    | 2.685126    | 2.7384624   | 3.0064714   | 2.7715447   | 2.7503977   | 2.793965    |
| "Prss44"  | 2.3972187   | 2.3657055   | 2.3473885   | 2.3539383   | 2.3897567   | 2.3822546   | 2.394412    | 2.4516194   |
| "Prss58"  | 2.54354785  | 2.5128773   | 2.42150105  | 2.47701825  | 2.5383229   | 2.5402371   | 2.52137925  | 2.5811697   |
| "Prtn3"   | 10.094868   | 7.9359145   | 11.142998   | 10.227074   | 7.618478    | 8.183519    | 8.56424     | 9.006057    |
| "Prune"   | 4.2417407   | 4.4348664   | 4.077506    | 3.5997221   | 4.185797    | 4.292445    | 4.160873    | 4.112931    |
| "Prx"     | 2.8048537   | 2.7705312   | 2.7409365   | 2.7212052   | 2.7899954   | 2.7961478   | 2.7958357   | 3.072327    |
| "Psap"    | 10.4646945  | 10.16793125 | 10.7814685  | 10.626867   | 10.865065   | 10.603116   | 10.546987   | 10.318222   |
| "Psapl1"  | 2.3837824   | 2.354363    | 2.2992604   | 2.3182573   | 2.3847275   | 2.8040004   | 2.3600197   | 2.3786192   |
| "Psd3"    | 7.4993405   | 7.900763    | 8.099712    | 8.468773    | 8.194889    | 7.891619    | 8.475224    | 8.917893    |
| "Psen1"   | 4.329247233 | 4.2943908   | 4.325250433 | 4.362040167 | 4.248474    | 4.297444467 | 4.165513133 | 4.3148786   |
| "Psen2"   | 11.174134   | 11.151756   | 12.380738   | 12.132055   | 10.708277   | 11.479559   | 12.229368   | 11.234396   |
| "Psenen"  | 10.336498   | 10.279084   | 10.295762   | 10.453966   | 10.484514   | 10.760403   | 10.488463   | 10.596598   |
| "Psg16"   | 2.414937    | 2.38622     | 2.305254    | 2.3634918   | 2.4049225   | 2.4285133   | 2.3998685   | 2.4211793   |
| "Psg18"   | 2.3920588   | 2.3629007   | 2.2834654   | 2.316556    | 2.389477    | 2.3864517   | 2.3741612   | 2.4096527   |
| "Psg19"   | 2.98973975  | 2.98509945  | 2.85671195  | 2.8898084   | 3.03283015  | 3.07427385  | 2.94715125  | 3.10859645  |
| "Psg23"   | 3.3010836   | 3.2680767   | 3.2185783   | 3.1197157   | 3.3256807   | 3.3065476   | 3.2489777   | 3.3244567   |
| "Psg28"   | 2.3538692   | 2.328869    | 2.293081    | 2.3638642   | 2.347968    | 2.3425388   | 2.3464665   | 2.3356736   |
| "Psip1"   | 7.8554143   | 7.35602495  | 7.9630595   | 7.6119678   | 6.63192895  | 7.687952    | 7.54012985  | 7.71515215  |
| "Psm1"    | 5.8279294   | 5.896302533 | 6.0090786   | 5.9762205   | 5.985933867 | 6.085214667 | 6.263701833 | 6.079520367 |
| "Psm2"    | 11.368939   | 11.651264   | 11.716941   | 11.296003   | 11.573044   | 11.578117   | 11.565156   | 11.587218   |
| "Psm3"    | 12.0431385  | 12.06865    | 12.416464   | 12.16921    | 12.388814   | 12.334093   | 12.457007   | 12.536103   |
| "Psm4"    | 10.521434   | 10.816009   | 11.4971485  | 11.052553   | 11.258377   | 11.045035   | 11.152012   | 11.356796   |
| "Psm5"    | 7.419799333 | 7.791033567 | 7.879384067 | 7.720464667 | 7.660961767 | 7.975154267 | 7.806285667 | 7.783465767 |
| "Psm6"    | 7.92328575  | 8.031414325 | 8.01971445  | 7.99490275  | 8.114020425 | 8.19695695  | 8.0144698   | 8.066022625 |
| "Psm7"    | 10.2467615  | 10.7000135  | 10.859849   | 10.3766315  | 10.54158    | 10.5797375  | 10.6420345  | 10.4653345  |
| "Psm8"    | 3.0588832   | 3.0943513   | 3.0829642   | 3.177665    | 3.1268225   | 3.1201131   | 3.1504753   | 3.1233587   |
| "Psmb1"   | 7.0993913   | 7.288463    | 7.203537    | 7.175357    | 7.30529275  | 7.29297105  | 7.2500624   | 7.34783555  |
| "Psmb10"  | 8.6759      | 7.7203355   | 10.632419   | 10.113688   | 8.666111    | 7.9133887   | 9.360282    | 9.626872    |
| "Psmb2"   | 9.318968    | 9.899614    | 10.057409   | 9.746749    | 9.816971    | 9.813469    | 9.737116    | 9.85249     |
| "Psmb3"   | 9.853757    | 10.687045   | 10.62218    | 10.4354195  | 10.74376475 | 10.800736   | 10.7181265  | 10.825285   |
| "Psmb4"   | 11.372671   | 11.679774   | 11.584324   | 11.425331   | 11.65648    | 11.733575   | 11.802758   | 11.646822   |
| "Psmb5"   | 10.805574   | 11.631972   | 11.618183   | 11.295527   | 11.529587   | 11.614493   | 11.370122   | 11.3889675  |
| "Psmb6"   | 10.572221   | 11.032529   | 11.284987   | 11.095529   | 11.158986   | 11.2766695  | 11.26658    | 11.291785   |
| "Psmb7"   | 7.725812    | 8.191224    | 7.973733    | 8.159351    | 8.151768    | 8.43758     | 8.176182    | 8.351422    |
| "Psmb8"   | 9.0506115   | 8.559107    | 10.60883    | 10.041813   | 8.811519    | 7.7807636   | 9.261341    | 9.301134    |
| "Psmb9"   | 7.9055877   | 7.3731365   | 9.776756    | 9.531774    | 7.6245728   | 6.6384926   | 8.879217    | 8.43564     |
| "Psmc1"   | 10.364027   | 10.685497   | 10.428051   | 10.201893   | 10.635765   | 10.598123   | 10.290918   | 10.306085   |
| "Psmc2"   | 10.653535   | 11.259266   | 11.0886525  | 10.8779415  | 11.2327585  | 11.425887   | 11.3321285  | 11.1883805  |
| "Psmc3"   | 10.08005    | 10.526946   | 10.434042   | 10.3087     | 10.55234    | 10.812431   | 10.4181385  | 10.454439   |
| "Psmc3ip" | 2.8830137   | 2.9731941   | 2.9177647   | 3.02799     | 2.995672    | 2.990089    | 2.991589    | 3.0246115   |
| "Psmc4"   | 10.0613015  | 10.497292   | 9.987895    | 9.980365    | 10.449433   | 10.6125635  | 10.3997565  | 10.3770915  |

|           |             |             |             |             |             |             |             |             |
|-----------|-------------|-------------|-------------|-------------|-------------|-------------|-------------|-------------|
| "Psmc5"   | 9.090853    | 9.626938    | 9.685583    | 9.493377    | 9.681621    | 9.99431     | 9.459971    | 9.521193    |
| "Psmc6"   | 8.959141767 | 9.116796167 | 8.698936867 | 8.8189201   | 9.0784412   | 9.196031667 | 9.478151333 | 8.907939667 |
| "Psmc1"   | 9.384861    | 10.11765    | 10.272969   | 9.8573      | 10.171514   | 10.278849   | 10.174113   | 10.365732   |
| "Psmc10"  | 8.273886    | 7.855603    | 8.373545    | 8.051144    | 7.5485077   | 7.74484     | 7.7188354   | 7.9515276   |
| "Psmc11"  | 8.05174022  | 8.11953646  | 8.0625864   | 7.8823797   | 8.18926972  | 8.26280802  | 8.16857784  | 8.1185879   |
| "Psmc12"  | 10.328668   | 10.667899   | 10.460599   | 10.202396   | 10.729928   | 10.844647   | 10.42243    | 10.684462   |
| "Psmc13"  | 7.936468    | 8.339666    | 8.426457    | 8.2460334   | 8.59655975  | 8.53693965  | 8.1792165   | 8.3387932   |
| "Psmc14"  | 9.076145    | 9.492892    | 10.1549835  | 9.63121     | 9.75878     | 9.888595    | 9.949206    | 9.751951    |
| "Psmc2"   | 9.131568    | 9.826242    | 9.894798    | 9.731066    | 9.867962    | 10.052993   | 9.904921    | 9.994676    |
| "Psmc3"   | 7.668452    | 7.956735    | 7.9114666   | 7.7308526   | 7.9223285   | 8.303       | 7.9113126   | 7.874452    |
| "Psmc4"   | 9.47676     | 10.2619365  | 9.381867    | 9.3012435   | 9.7645505   | 10.309386   | 9.4267835   | 9.64893825  |
| "Psmc5"   | 7.9724307   | 8.116077    | 8.655281    | 8.261975    | 8.022425    | 8.270805    | 8.289717    | 8.244092    |
| "Psmc6"   | 11.179813   | 11.600789   | 11.14827    | 11.1210535  | 11.6054495  | 11.795152   | 11.598815   | 11.5258525  |
| "Psmc7"   | 4.834787167 | 4.795591833 | 4.751009933 | 4.7804187   | 4.776195433 | 4.9205406   | 4.706473633 | 4.766104867 |
| "Psmc8"   | 8.845557    | 10.437945   | 9.708747    | 9.822401    | 10.257439   | 10.251843   | 9.918621    | 10.006218   |
| "Psmc9"   | 6.17951095  | 6.31864765  | 5.1998291   | 5.1038815   | 5.5648615   | 5.97201275  | 5.0053204   | 5.2421165   |
| "Psmc1"   | 10.392825   | 10.385295   | 11.483945   | 11.026615   | 9.886225    | 9.84775     | 10.3030815  | 10.539727   |
| "Psmc2"   | 10.206252   | 10.26844    | 11.904951   | 11.349621   | 10.426519   | 10.025749   | 11.07165    | 10.9796505  |
| "Psmc3"   | 5.87689485  | 6.52664985  | 5.7042205   | 5.41737555  | 6.1042776   | 6.00451035  | 5.76945665  | 5.6834638   |
| "Psmc4"   | 9.0818929   | 9.437749667 | 9.4549139   | 9.511867333 | 9.602614167 | 9.334318667 | 9.4565582   | 9.516465867 |
| "Psmf1"   | 5.618332825 | 5.8912945   | 5.6909863   | 5.557697675 | 5.788010925 | 5.52967825  | 5.778614575 | 5.41913275  |
| "Psmg1"   | 8.420174    | 8.845714    | 8.944574    | 8.974283    | 8.828153    | 9.059275    | 8.883044    | 8.844344    |
| "Psmg2"   | 7.0784305   | 7.8613117   | 7.896985    | 7.8790895   | 7.637385    | 7.7655075   | 8.0741733   | 7.9996506   |
| "Psmg3"   | 6.827038    | 6.3179746   | 6.446207    | 6.4449534   | 6.4418855   | 6.407981    | 6.503106    | 6.4125195   |
| "Psmg4"   | 5.456711    | 5.617838    | 5.642912    | 5.757313    | 4.998166    | 5.542097    | 5.6892524   | 5.370881    |
| "Pspc1"   | 6.3481226   | 8.03733     | 6.7878017   | 6.210934    | 6.0772552   | 4.9473577   | 6.264316    | 5.0331025   |
| "Pspc1"   | 6.676013    | 6.1799684   | 6.9709725   | 6.5342627   | 6.1143804   | 7.467571    | 6.800939    | 6.553695    |
| "Psrc1"   | 3.0498567   | 3.0396626   | 2.890981    | 2.944296    | 3.3579798   | 3.0497098   | 3.0203726   | 3.1112704   |
| "Pstk"    | 4.2839723   | 4.59325005  | 4.7162851   | 4.68103975  | 4.38365365  | 4.6508067   | 4.8873112   | 4.7261458   |
| "Pstpip2" | 5.460615167 | 5.32479     | 6.2328906   | 6.025497933 | 5.148587733 | 4.940428533 | 5.859911533 | 5.807188467 |
| "Ptafr"   | 2.5595374   | 2.5285892   | 2.4412007   | 2.4775243   | 2.5572963   | 2.5546646   | 2.5444207   | 2.5524888   |
| "Ptbp1"   | 5.7370403   | 5.5166371   | 5.6388605   | 5.683104    | 5.44649625  | 5.80043615  | 5.76398685  | 5.94446775  |
| "Ptbp2"   | 8.201172    | 7.615533    | 6.7845445   | 6.845469    | 7.4771733   | 7.581456    | 7.5989447   | 7.951403    |
| "Ptcd1"   | 4.0575522   | 4.2444429   | 3.8483305   | 4.0012503   | 3.82541225  | 4.2391193   | 4.0249438   | 4.0053354   |
| "Ptcd2"   | 7.2339315   | 7.033681    | 7.2580104   | 7.09633     | 7.3471723   | 7.242185    | 7.110022    | 7.2101665   |
| "Ptcd3"   | 8.379262    | 8.382026    | 8.531323    | 8.574222    | 9.035616    | 8.685071    | 8.9039545   | 8.705459    |
| "Ptch1"   | 5.9568309   | 5.7987966   | 5.56203575  | 5.7863306   | 5.66954465  | 6.05940635  | 5.713267    | 5.9342373   |
| "Ptss1"   | 6.970179    | 6.886270067 | 7.060521767 | 7.080158333 | 7.129236967 | 7.0192504   | 7.135201667 | 7.1855752   |
| "Ptss2"   | 6.10155148  | 6.18647164  | 5.66732938  | 5.97377236  | 5.78921322  | 6.51902326  | 5.5762795   | 5.87736146  |
| "Pten"    | 10.01424767 | 10.06257367 | 9.9300575   | 9.832980167 | 9.826216333 | 9.986073667 | 9.686298    | 9.652194    |
| "Pter"    | 7.3203401   | 6.4034723   | 8.6749765   | 7.84146     | 6.888347    | 7.45351225  | 8.1255208   | 7.51830835  |
| "Ptgds"   | 7.3794215   | 6.4548814   | 8.834097    | 9.3262      | 9.1752695   | 10.199261   | 11.100442   | 10.5528925  |
| "Ptger2"  | 3.1521258   | 5.042526    | 6.2120237   | 4.9428706   | 5.2051497   | 5.4742727   | 5.8410497   | 5.136051    |
| "Ptger3"  | 2.5563664   | 2.52752805  | 2.5184168   | 2.4935914   | 2.56177365  | 2.5518985   | 2.5412717   | 2.5473931   |
| "Ptger4"  | 3.8327027   | 3.414236    | 4.403857    | 4.44938445  | 3.816314    | 3.4354416   | 3.8081892   | 3.6213095   |
| "Ptges2"  | 6.9180336   | 7.060831    | 6.6831813   | 6.6620784   | 6.9739466   | 7.023187    | 6.461399    | 6.472067    |
| "Ptgir"   | 2.5723252   | 2.5442088   | 2.4531689   | 2.4985397   | 2.576187    | 2.5666127   | 2.558253    | 2.566325    |
| "Ptgir"   | 2.8013697   | 2.8075137   | 2.6899614   | 2.7277756   | 2.7819338   | 2.792919    | 2.7863066   | 2.8068798   |
| "Ptgis"   | 5.809032    | 5.9867325   | 5.315377    | 6.048807    | 6.203639    | 5.0631046   | 6.0080376   | 6.264514    |
| "Ptgr1"   | 4.311902    | 4.022158    | 6.9718194   | 5.7348337   | 5.5801134   | 4.288583    | 6.8609705   | 6.308113    |
| "Ptgr2"   | 5.514429    | 5.788183133 | 5.854503533 | 6.199818333 | 5.976728167 | 5.952372667 | 6.653982333 | 6.4639141   |
| "Ptgs1"   | 8.6031695   | 7.03499565  | 9.34414525  | 8.5184715   | 7.89874575  | 7.22093315  | 8.5861355   | 7.98434135  |
| "Ptgs2"   | 2.6350045   | 2.6150998   | 2.5348565   | 2.569587    | 2.642704    | 2.6370565   | 2.6160285   | 2.63768135  |
| "Pth1r"   | 3.406867    | 3.0561056   | 4.555286    | 3.8892634   | 3.4637032   | 3.38022     | 4.508896    | 3.7744675   |
| "Pth2r"   | 2.3923414   | 2.363341    | 2.2947106   | 2.3302104   | 2.3859615   | 2.379549    | 2.379725    | 2.3727074   |
| "Pthlh"   | 2.63650895  | 2.6098694   | 2.5204587   | 2.56373615  | 2.63552885  | 2.65468165  | 2.6064564   | 2.63937795  |
| "Ptk2"    | 5.67108415  | 5.77135825  | 5.5711855   | 5.57934155  | 5.62770915  | 5.68887335  | 5.52692185  | 5.7322116   |
| "Ptk2b"   | 5.7700872   | 5.99802     | 6.321177    | 6.1603885   | 6.133949    | 5.7664175   | 6.1743035   | 5.9693804   |
| "Ptk6"    | 2.4526315   | 2.4218447   | 2.3523428   | 2.3829384   | 2.449147    | 2.445113    | 2.436128    | 2.470757    |
| "Ptms"    | 6.448370467 | 6.874896567 | 6.9088169   | 7.328518467 | 7.034152833 | 6.767563433 | 7.397137467 | 7.572061    |
| "Ptn"     | 3.024598    | 3.0153074   | 2.9297454   | 2.9663596   | 3.1122346   | 3.0700822   | 3.0034072   | 3.0711682   |
| "Ptov1"   | 5.4593935   | 5.88625015  | 5.6448918   | 5.7834615   | 5.70389215  | 5.9161251   | 5.37672615  | 5.6927375   |
| "Ptp4a2"  | 9.4109805   | 9.386047567 | 9.072485    | 9.2412651   | 9.414871433 | 9.232358367 | 9.3411488   | 9.4617598   |
| "Ptp4a3"  | 3.4220046   | 3.213428    | 3.801579    | 3.63520785  | 3.63924745  | 3.230577    | 3.7621781   | 3.47220065  |
| "Ptpla"   | 6.876442    | 7.6719594   | 7.0682216   | 7.3310804   | 7.054059    | 8.079507    | 7.355786    | 7.2643986   |
| "Ptplad1" | 9.3324895   | 9.690256433 | 9.558607    | 9.556140667 | 9.726480867 | 9.041882133 | 9.473105667 | 9.494966267 |
| "Ptplad2" | 6.431613    | 3.6286898   | 7.3179383   | 6.7954707   | 4.716799    | 4.9228077   | 6.2722974   | 5.432654    |
| "Ptplb"   | 10.700497   | 10.755506   | 11.23899    | 11.453396   | 11.023472   | 11.09423    | 11.555755   | 11.45776    |
| "Ptptm1"  | 9.917311    | 10.414597   | 9.844458    | 10.10877    | 9.846575    | 9.8346405   | 9.227605    | 9.392562    |
| "Ptptn1"  | 8.653272    | 7.51913035  | 8.4411738   | 7.694728    | 7.6522503   | 7.5641601   | 7.4476255   | 7.3206435   |
| "Ptptn11" | 6.203487567 | 6.293256867 | 6.042776433 | 6.0518775   | 6.211069933 | 6.307239533 | 6.041381167 | 6.1058293   |
| "Ptptn12" | 8.695369575 | 8.24481575  | 8.56325     | 8.372193125 | 8.11286375  | 8.7051385   | 8.4428255   | 8.38865675  |
| "Ptptn13" | 2.534422    | 2.4812458   | 2.4654877   | 2.4720392   | 2.5111687   | 2.6613665   | 2.5167196   | 2.4823005   |
| "Ptptn14" | 2.5952184   | 2.5665169   | 2.4843698   | 2.54756     | 2.5956929   | 2.5930302   | 2.5764914   | 2.5845666   |
| "Ptptn18" | 6.1023903   | 4.9822893   | 7.510813    | 6.3236413   | 5.8326044   | 5.670233    | 6.2257624   | 5.779619    |
| "Ptptn2"  | 6.601353775 | 5.88388     | 5.78162585  | 5.787113875 | 5.62473915  | 5.9255668   | 5.727785425 | 5.770376275 |
| "Ptptn20" | 2.7753065   | 2.8461366   | 2.643108    | 2.6907768   | 2.8362381   | 2.7916048   | 2.7517135   | 2.7530375   |
| "Ptptn21" | 5.091393567 | 5.167251833 | 5.0887054   | 5.096793367 | 5.098490533 | 5.164320933 | 5.143721367 | 5.383928567 |
| "Ptptn22" | 4.06146     | 3.163151    | 4.0025992   | 3.7107542   | 3.6353633   | 3.0813732   | 3.9809875   | 3.0787976   |
| "Ptptn4"  | 2.6765988   | 2.6360009   | 2.5651839   | 2.5956402   | 2.6567993   | 2.6578648   | 2.650039    | 2.6408064   |
| "Ptptn5"  | 2.73954475  | 2.7089306   | 2.6284618   | 2.68260615  | 2.7315612   | 2.7739277   | 2.7247754   | 2.72538765  |

|             |             |             |             |             |             |             |             |             |
|-------------|-------------|-------------|-------------|-------------|-------------|-------------|-------------|-------------|
| "Ptpn6"     | 6.4402045   | 6.20543215  | 7.4510997   | 6.750946    | 6.5488798   | 6.6697425   | 6.9635365   | 6.53965885  |
| "Ptpn9"     | 6.1820493   | 5.631479    | 6.1468167   | 5.3886757   | 5.2910924   | 5.6970906   | 5.8376007   | 4.583136    |
| "Ptrpa"     | 7.40743     | 7.346207    | 7.8381147   | 7.4810724   | 7.112131    | 7.2128973   | 7.523048    | 7.433851    |
| "Ptrpb"     | 9.9078455   | 9.363395    | 9.361231    | 9.564126    | 9.950034    | 9.954071    | 9.705427    | 9.692186    |
| "Ptrpc"     | 10.022953   | 7.799929    | 10.517435   | 9.759015    | 8.799504    | 8.754454    | 9.466323    | 9.044547    |
| "Ptrcap"    | 2.9639466   | 2.92488     | 2.87436     | 2.9397476   | 3.4068732   | 2.9448812   | 2.9291534   | 2.938907    |
| "Ptrpd"     | 9.165414667 | 9.682992    | 9.614045667 | 10.447095   | 10.00438967 | 9.852632167 | 10.43016567 | 10.791499   |
| "Ptrpe"     | 3.36791955  | 3.43089485  | 5.0458775   | 4.34095     | 3.5185642   | 3.49486065  | 3.6865381   | 3.68369075  |
| "Ptrpf"     | 5.932512967 | 7.013845867 | 8.133117833 | 7.632358967 | 7.4269269   | 6.762163    | 8.2999735   | 8.3914854   |
| "Ptrpg"     | 4.5902863   | 5.120675    | 4.7650833   | 4.7367167   | 4.829089    | 4.8544483   | 4.7397995   | 5.057292    |
| "Ptrpj"     | 4.391725367 | 4.1951053   | 4.548974667 | 4.2515939   | 4.385252733 | 4.4793956   | 4.3898555   | 4.242024433 |
| "Ptrpk"     | 5.332079167 | 5.266364467 | 5.581730267 | 5.913960167 | 5.658663667 | 5.8198471   | 6.24373     | 6.1272413   |
| "Ptrpm"     | 6.8350267   | 5.144365    | 6.166958    | 5.6343617   | 5.52438     | 5.228675    | 5.640467    | 4.8863487   |
| "Ptrpro"    | 2.41637235  | 2.27289655  | 2.91920055  | 3.0373773   | 2.3113941   | 2.4245412   | 2.4346323   | 2.4159012   |
| "Ptrpr"     | 2.3417723   | 2.3866289   | 2.271854    | 2.300413    | 2.339695    | 2.3269472   | 2.3303254   | 2.3240802   |
| "Ptrps"     | 2.5339432   | 2.530634    | 3.39752     | 2.6160119   | 2.5332909   | 2.5878031   | 3.0003304   | 2.946573    |
| "Ptrpt"     | 2.4608054   | 2.427123    | 2.3286853   | 2.4021466   | 2.4483893   | 2.4401076   | 2.4393823   | 2.4335914   |
| "Ptrpru"    | 2.7310874   | 2.729152    | 2.6082163   | 2.684164    | 2.8240018   | 2.7672536   | 2.725071    | 2.7664926   |
| "Ptrpz1"    | 2.74044785  | 2.7231351   | 2.6766286   | 2.67952595  | 2.7627882   | 2.744993    | 2.6954076   | 2.74545875  |
| "Ptrf"      | 3.049277033 | 2.9581418   | 3.1481599   | 3.004709533 | 3.030906933 | 2.967554633 | 3.145118467 | 3.034129233 |
| "Ptrh1"     | 2.41118     | 2.3858612   | 2.3594294   | 2.330062    | 2.4076679   | 2.406036    | 2.400733    | 2.40341     |
| "Ptrh2"     | 5.1379757   | 6.39169235  | 6.13831935  | 6.5814252   | 6.96276575  | 6.03962715  | 6.4465648   | 6.61439085  |
| "Pts"       | 8.087826    | 8.131027    | 9.169499    | 8.635502    | 7.6352296   | 7.4574313   | 8.547626    | 8.304556    |
| "Pttg1"     | 7.443459633 | 7.896944967 | 7.634829833 | 7.9528684   | 7.573459733 | 7.516906467 | 7.837798867 | 7.706954067 |
| "Pttg1ip"   | 9.601437167 | 10.36332347 | 9.543586233 | 10.12519013 | 10.2880541  | 10.1031236  | 10.36468633 | 9.999793767 |
| "Ptx3"      | 2.7587488   | 2.7379339   | 2.6231933   | 2.6710134   | 2.7765713   | 2.766988    | 2.7314959   | 2.7630508   |
| "Puf60"     | 9.319936    | 9.115982    | 9.130775    | 8.830697    | 9.11421     | 9.177288    | 9.034953    | 8.974549    |
| "Pum1"      | 7.751310133 | 7.691711833 | 7.422231733 | 7.830557667 | 7.764728467 | 7.7821295   | 8.098539433 | 7.831263733 |
| "Pum2"      | 7.8733654   | 7.38033667  | 7.543872433 | 7.426825267 | 7.491505133 | 7.757844433 | 7.642694667 | 7.564113567 |
| "Pura"      | 7.6883658   | 7.971717    | 7.8428337   | 8.128974    | 7.979545    | 8.58196775  | 8.37457815  | 8.26593635  |
| "Purb"      | 5.9722404   | 6.284961767 | 6.069440767 | 6.034815    | 5.739592467 | 5.6537406   | 6.020247433 | 5.869751967 |
| "Purg"      | 3.13894345  | 3.639266    | 3.9157829   | 4.21732735  | 4.04197905  | 4.197088    | 4.09797275  | 4.2703663   |
| "Pus1"      | 7.269433    | 7.539996    | 7.5001855   | 7.7489114   | 7.8268642   | 7.9091806   | 7.385326    | 7.542696    |
| "Pus10"     | 7.1277905   | 7.9306154   | 7.5571995   | 7.6361055   | 7.747438    | 7.8070855   | 7.5500994   | 7.435451    |
| "Pus3"      | 3.9144576   | 4.0298488   | 3.90534815  | 3.95911275  | 4.0940822   | 4.59380125  | 4.00541055  | 4.0324345   |
| "Pus7"      | 6.2521143   | 6.875974    | 5.676786    | 5.885626    | 6.881824    | 6.6549597   | 5.817741    | 5.4135866   |
| "Pvr"       | 5.34475686  | 3.8979936   | 3.87061566  | 4.14475638  | 3.64651288  | 4.32017274  | 3.97520444  | 4.05362408  |
| "Pvrl2"     | 6.6221964   | 7.46343125  | 6.15962835  | 6.49973475  | 6.5826565   | 6.7353895   | 6.16584065  | 6.32708915  |
| "Pvrl3"     | 5.3744214   | 5.08563902  | 5.34347612  | 5.31131388  | 5.4461269   | 5.46979044  | 5.73204972  | 5.6774176   |
| "Pvrl4"     | 2.4338794   | 2.411014    | 2.36811     | 2.4043198   | 2.4285889   | 2.4256911   | 2.4264903   | 2.4154906   |
| "Pvt1"      | 2.97498515  | 3.12767875  | 3.39322075  | 3.09123695  | 2.97615955  | 2.9272905   | 2.66997765  | 2.9203881   |
| "Pwp1"      | 5.6356747   | 5.54107965  | 5.3034514   | 5.1472075   | 5.6474345   | 5.62634415  | 5.3249427   | 5.2330364   |
| "Pwp2"      | 6.468149    | 5.786623    | 5.827396    | 6.0964127   | 6.1131287   | 6.460707    | 5.8186727   | 6.1892214   |
| "Pxk"       | 8.239952    | 7.4314775   | 7.1520205   | 7.427726    | 6.9178267   | 7.3782196   | 6.8131638   | 6.892948    |
| "Pxmp2"     | 10.154966   | 11.320154   | 11.458284   | 11.853395   | 11.239743   | 11.121037   | 11.486445   | 11.526014   |
| "Pxmp3"     | 9.194511    | 9.673123    | 9.395684    | 9.617438    | 9.936657    | 9.781568    | 9.570304    | 9.5200205   |
| "Pxmp4"     | 7.2365847   | 8.772338    | 7.5408525   | 7.7047663   | 8.518375    | 8.599409    | 8.283582    | 7.8149867   |
| "Pxn"       | 8.27559835  | 7.40413915  | 8.0603145   | 7.854361    | 7.7417095   | 7.862359    | 8.2225432   | 7.74735515  |
| "Pycard"    | 4.75342545  | 4.0695387   | 5.4950165   | 4.96502615  | 4.33172385  | 4.16712715  | 4.69878625  | 4.6781148   |
| "Pycr2"     | 5.3692565   | 5.2103987   | 6.7320833   | 5.9469852   | 5.6967716   | 5.562967    | 5.965403    | 5.640833    |
| "Pycl1"     | 4.471917    | 5.9326873   | 6.033799    | 5.9475603   | 5.9631343   | 6.1418715   | 5.9447007   | 6.3020024   |
| "Pygb"      | 5.2450686   | 4.549217    | 6.2485466   | 5.2237296   | 4.2077613   | 4.4556823   | 4.8619604   | 4.9158573   |
| "Pygl"      | 11.696579   | 12.737943   | 11.998306   | 12.7089815  | 13.401051   | 12.631252   | 12.8626585  | 12.984192   |
| "Pygo2"     | 6.5523167   | 6.373964    | 6.4403477   | 6.4165344   | 6.621025    | 6.832958    | 6.3873167   | 6.5730805   |
| "Pyhin1"    | 4.85143625  | 3.80988655  | 7.1717985   | 6.3537198   | 4.4037445   | 4.55768135  | 6.0473802   | 4.8539385   |
| "Pyroxd1"   | 6.6811237   | 7.36694     | 7.243095    | 6.9229794   | 6.978384    | 7.012941    | 7.1996455   | 6.7735114   |
| "Pzp"       | 14.825417   | 14.78383    | 14.972573   | 14.868996   | 14.896294   | 14.96762    | 14.895826   | 14.97925    |
| "Qars"      | 7.835750825 | 8.160172625 | 7.73397575  | 7.796907575 | 8.023058825 | 8.06727125  | 7.729138125 | 8.032167    |
| "Qdpr"      | 12.1178305  | 12.409775   | 12.6904675  | 12.82655    | 12.449342   | 12.22802925 | 12.9742595  | 12.821179   |
| "Qk"        | 8.148238225 | 7.680983825 | 7.7196972   | 7.84105725  | 7.70561385  | 7.930242175 | 8.163052325 | 7.833204775 |
| "Qpct"      | 6.347037    | 6.4166126   | 6.017666    | 6.4201026   | 8.142936    | 7.664172    | 8.439613    | 6.9535537   |
| "Qpctl"     | 3.7417943   | 4.0246906   | 4.04481115  | 3.75805825  | 3.60809515  | 3.96256925  | 3.690289    | 3.58278705  |
| "Qprt"      | 7.70219075  | 8.049641    | 9.3851455   | 8.505155    | 7.9199535   | 7.8516735   | 8.227762    | 9.105993    |
| "Qrich1"    | 8.053061    | 7.784127    | 7.6443295   | 7.815641    | 8.046317    | 7.840831    | 7.875557    | 7.8249917   |
| "Qrs11"     | 5.0321852   | 5.9922067   | 5.6078393   | 5.63014735  | 5.81695385  | 5.87281935  | 6.30267955  | 6.17960425  |
| "Qser1"     | 4.999623233 | 4.822151    | 4.518827133 | 4.731726067 | 4.412928667 | 5.308382867 | 4.795033133 | 4.856479333 |
| "Qsox1"     | 10.3426095  | 9.884306    | 9.7985035   | 9.774147    | 9.810434    | 9.621255    | 9.086964    | 9.7097875   |
| "Qtrtl1"    | 6.081717    | 5.064449    | 5.2489233   | 4.6399975   | 5.1195707   | 5.6966944   | 5.055969    | 5.205735    |
| "Qtrtd1"    | 5.898677    | 5.410472    | 4.7239537   | 4.8522134   | 5.417341    | 5.594536    | 5.6683216   | 5.601813    |
| "R3hcc1"    | 5.4183674   | 6.413932    | 5.622611    | 5.8024664   | 5.6667337   | 5.9099283   | 5.38056     | 5.6156325   |
| "R3hdm1"    | 8.555613    | 8.460533    | 8.310107    | 8.376544    | 8.564459    | 8.700835    | 8.262727    | 8.423241    |
| "R74862"    | 2.6301613   | 2.6629574   | 2.5336547   | 2.5797317   | 2.616505    | 2.60745     | 2.6000597   | 2.7190175   |
| "Rab1"      | 10.823323   | 10.9567515  | 10.6142695  | 10.5054505  | 11.106211   | 10.8140195  | 11.055103   | 10.626085   |
| "Rab10"     | 9.019628333 | 8.802716667 | 8.839109    | 8.901167    | 8.869696    | 8.915989667 | 9.050988333 | 8.865685333 |
| "Rab11a"    | 9.369153    | 9.1285335   | 9.4795365   | 9.2537345   | 9.186902    | 9.0858918   | 9.393616    | 9.2744615   |
| "Rab11b"    | 7.95694     | 8.282043    | 7.6741314   | 7.9628305   | 7.753713    | 7.899143    | 7.8824697   | 8.013011    |
| "Rab11fip5" | 3.9666963   | 3.8480864   | 3.6308813   | 3.9157774   | 4.431203    | 3.871379    | 3.6334846   | 3.866168    |
| "Rab12"     | 7.0324006   | 7.3932886   | 7.2052016   | 7.2170496   | 7.200416    | 7.0064144   | 6.9615865   | 7.014362    |
| "Rab13"     | 5.587164    | 5.3776927   | 5.9451795   | 5.697784    | 5.66832     | 5.8632393   | 5.7899694   | 5.6140866   |
| "Rab14"     | 8.4814015   | 8.364410533 | 8.38071845  | 8.5552021   | 8.480197283 | 8.50860275  | 8.757730683 | 8.532559333 |
| "Rab15"     | 2.4441833   | 2.411302    | 2.3798501   | 2.3887997   | 2.4308424   | 2.41848     | 2.4533966   | 2.3492131   |

|            |             |             |             |             |             |             |             |             |
|------------|-------------|-------------|-------------|-------------|-------------|-------------|-------------|-------------|
| "Rab17"    | 6.1937289   | 5.9363982   | 6.341451    | 6.58813625  | 6.1862285   | 6.18954265  | 6.3667843   | 6.50523925  |
| "Rab18"    | 6.688541    | 8.45798315  | 8.305296    | 8.2269855   | 8.5328568   | 8.385464    | 8.04951265  | 8.3733605   |
| "Rab1b"    | 6.1951313   | 6.945705    | 7.1951833   | 7.2699575   | 7.371376    | 6.759141    | 7.393606    | 7.015581    |
| "Rab20"    | 8.37889     | 5.861306    | 7.1629744   | 7.0674524   | 4.9993877   | 6.127367    | 6.709526    | 6.9019704   |
| "Rab21"    | 6.7470795   | 6.15239     | 6.88851525  | 6.3979275   | 6.3288415   | 6.58016185  | 6.79206425  | 6.2619895   |
| "Rab22a"   | 6.3542389   | 6.438976867 | 6.2885698   | 6.3212983   | 6.380222667 | 6.418244533 | 6.338343933 | 6.519654633 |
| "Rab23"    | 4.17519545  | 4.4023552   | 4.3849002   | 4.6835107   | 4.21389675  | 4.08533885  | 4.51190435  | 4.42946325  |
| "Rab24"    | 8.27919675  | 8.1778405   | 8.4193715   | 8.3704025   | 8.4798315   | 8.5778065   | 8.4809295   | 8.732835    |
| "Rab27a"   | 2.7320387   | 2.707461    | 2.5952203   | 2.6426773   | 2.7424717   | 2.775486    | 2.708193    | 2.7377856   |
| "Rab27b"   | 2.7397758   | 2.75435365  | 2.64519655  | 2.83367385  | 2.85392565  | 2.82085325  | 2.74272535  | 2.7801215   |
| "Rab28"    | 7.809348    | 7.49678335  | 7.778202    | 7.5297548   | 7.19898575  | 7.31000725  | 7.55620185  | 7.4505462   |
| "Rab2a"    | 7.58305934  | 7.66837042  | 7.4462797   | 7.47333986  | 7.53968766  | 7.56669656  | 7.5099242   | 7.4724305   |
| "Rab2b"    | 3.13167384  | 3.14115928  | 3.14942738  | 3.18337584  | 3.14060622  | 3.19359768  | 3.24369476  | 3.13177872  |
| "Rab30"    | 10.836601   | 9.921837    | 5.7803683   | 7.6826677   | 9.009109    | 10.10983    | 7.9074883   | 7.116765    |
| "Rab31"    | 7.226063    | 6.198678    | 7.084565    | 6.9466934   | 6.340773    | 6.214921    | 6.5554876   | 6.134516    |
| "Rab32"    | 8.717485    | 8.168199    | 10.030904   | 9.348362    | 8.337363    | 8.252331    | 9.567477    | 8.839304    |
| "Rab33b"   | 8.86311     | 7.9626355   | 8.210943    | 8.018557    | 8.045931    | 8.204773    | 8.145544    | 7.9530134   |
| "Rab34"    | 4.9854485   | 5.3250262   | 4.6539246   | 4.697837    | 5.43218125  | 5.0312495   | 4.49895445  | 5.39410665  |
| "Rab38"    | 4.005148    | 3.8787003   | 5.1263742   | 3.947087    | 4.3498006   | 3.9639637   | 4.2169676   | 4.0387077   |
| "Rab3a"    | 2.625221    | 2.3537984   | 2.3381395   | 2.3484082   | 2.3348987   | 2.3721695   | 2.3828769   | 2.3632283   |
| "Rab3c"    | 2.658265    | 2.625495    | 2.5683556   | 2.5790846   | 2.649211    | 2.647812    | 2.641965    | 2.6402073   |
| "Rab3d"    | 3.407496025 | 3.422109475 | 3.430856725 | 3.620538025 | 3.71470105  | 3.370035625 | 3.586426175 | 3.851545625 |
| "Rab3gap2" | 5.742054    | 5.398707    | 5.147587    | 5.3518424   | 5.7988667   | 5.3054533   | 5.4446945   | 4.8288574   |
| "Rab3il1"  | 2.6572652   | 2.526033167 | 2.609859567 | 2.7963128   | 2.6471789   | 2.656454567 | 2.654021167 | 2.636124667 |
| "Rab3ip"   | 8.425331    | 8.664267    | 7.73612     | 7.944036    | 8.089527    | 8.45413     | 7.888522    | 8.444638    |
| "Rab40b"   | 2.7853968   | 2.7599077   | 2.821088    | 2.7191072   | 2.7842286   | 2.8051      | 2.7864199   | 2.7742677   |
| "Rab40c"   | 7.0222387   | 7.131464    | 7.002103    | 6.9731812   | 6.981844    | 7.083281    | 6.7965946   | 6.9293737   |
| "Rab43"    | 8.24115     | 9.554426    | 8.628827    | 9.523123    | 9.707615    | 9.369158    | 9.591652    | 9.490545    |
| "Rab4a"    | 7.10190605  | 8.5894245   | 7.41821225  | 7.42760135  | 8.1366939   | 7.5139017   | 7.47955575  | 7.479841    |
| "Rab5a"    | 10.8529825  | 10.406834   | 10.211256   | 10.386287   | 10.554041   | 10.410284   | 10.489109   | 10.419767   |
| "Rab5b"    | 2.661202    | 2.6361027   | 2.5486164   | 2.6371474   | 2.6658268   | 2.6542113   | 2.628553    | 2.661735    |
| "Rab5c"    | 8.522282    | 8.464252    | 9.094066    | 8.991404    | 8.664776    | 8.434485    | 8.739655    | 8.932707    |
| "Rab6a"    | 9.941439    | 9.8499315   | 9.56762     | 9.6112375   | 9.6788565   | 9.78767375  | 9.6032725   | 9.757722    |
| "Rab6b"    | 2.4811022   | 2.414029    | 2.4545307   | 2.4111543   | 2.4621143   | 2.6207633   | 2.4705548   | 2.4512985   |
| "Rab7"     | 10.0080835  | 10.506867   | 9.8081275   | 9.6806455   | 9.8731745   | 9.7420925   | 9.452934    | 9.6865445   |
| "Rab711"   | 6.131717    | 6.0759406   | 7.2889996   | 7.0905395   | 6.6357946   | 6.495998    | 7.151286    | 6.886195    |
| "Rab8a"    | 7.305208    | 7.527369    | 7.483501    | 7.25711     | 7.1146703   | 7.0306687   | 6.942797    | 7.3269005   |
| "Rab8b"    | 8.668373    | 6.99564     | 9.030645    | 8.427822    | 8.088298    | 7.845856    | 8.361064    | 7.494431    |
| "Rab9"     | 11.124873   | 11.315212   | 10.748605   | 10.729391   | 11.014469   | 11.747726   | 11.063824   | 11.010381   |
| "Rabac1"   | 9.658447    | 10.111483   | 9.11508     | 9.341794    | 9.443908    | 9.945584    | 9.3345375   | 9.306906    |
| "Rabep1"   | 6.17915245  | 5.952018325 | 5.929104125 | 5.9846495   | 5.7477585   | 6.070725125 | 5.9898149   | 5.952232325 |
| "Rabep2"   | 3.5906124   | 3.1657307   | 3.6731696   | 3.1035209   | 2.8619227   | 3.3624778   | 3.2627716   | 3.2577095   |
| "Rabepk"   | 4.4277487   | 4.3945148   | 4.9135313   | 4.43120675  | 4.4300133   | 4.7342107   | 4.7590775   | 4.5955784   |
| "Rabgap1"  | 4.9953626   | 4.9737576   | 4.7996939   | 4.98315     | 5.05731385  | 5.1728781   | 5.00626395  | 5.13559235  |
| "Rabgap1l" | 6.307274    | 7.395254    | 6.101513    | 7.343169    | 7.21282     | 6.711102    | 7.2441516   | 7.3978605   |
| "Rabgef1"  | 8.424324133 | 6.664941533 | 5.961675967 | 5.504093233 | 6.736709933 | 6.664181767 | 6.3835891   | 5.713453333 |
| "Rabggta"  | 6.7700663   | 7.211193    | 6.797686    | 6.901577    | 6.804961    | 6.9121857   | 6.7042584   | 7.3475757   |
| "Rabggtb"  | 9.90575     | 9.874622    | 8.5986      | 8.838352    | 9.364763    | 10.080508   | 8.816706    | 9.2281      |
| "Rabif"    | 4.5857595   | 4.4380926   | 4.8354105   | 4.84257355  | 4.5577418   | 4.56005035  | 4.91220445  | 4.88127735  |
| "Rab13"    | 5.22796625  | 5.6273435   | 5.2470919   | 5.2272635   | 5.38444825  | 5.2421174   | 5.09056765  | 4.9483932   |
| "Rab15"    | 4.3899794   | 4.1456113   | 4.7599416   | 4.112266    | 4.1345186   | 3.9223027   | 4.117559    | 4.131666    |
| "Rab16"    | 4.964380133 | 4.631081067 | 4.487412567 | 4.700798133 | 5.118737933 | 4.733624    | 4.789787867 | 5.050564433 |
| "Rac1"     | 7.5662698   | 7.687121    | 7.5904876   | 7.5674481   | 7.5140182   | 7.573553067 | 7.474486167 | 7.527386133 |
| "Rac2"     | 5.118897    | 2.9208941   | 6.1775303   | 4.6866364   | 3.3019853   | 2.9330428   | 4.474482    | 3.6594746   |
| "Rac3"     | 3.0992951   | 3.0837793   | 2.9913445   | 3.1385462   | 3.4106202   | 3.0784612   | 2.7457922   | 3.0730627   |
| "Racgap1"  | 2.9077296   | 2.8933709   | 2.8635738   | 2.8506603   | 2.9301555   | 2.9406183   | 2.9195693   | 2.9074817   |
| "Rad1"     | 4.8679185   | 5.1216526   | 5.2656713   | 5.339969    | 6.0660625   | 5.7129936   | 6.1269817   | 5.5224404   |
| "Rad17"    | 8.661766    | 8.024082    | 7.5535064   | 7.774931    | 7.942398    | 8.100418    | 7.945837    | 7.8723636   |
| "Rad18"    | 2.4768634   | 2.449871    | 2.4814215   | 2.4140165   | 2.46915     | 2.460619    | 2.4709835   | 2.4529216   |
| "Rad21"    | 7.0764269   | 6.515606933 | 6.1256667   | 6.296412033 | 6.4643284   | 6.712022733 | 6.926752333 | 6.742368667 |
| "Rad23a"   | 5.91211115  | 6.466273    | 6.010657    | 5.72387565  | 5.68715465  | 5.84569835  | 6.2176123   | 6.0043815   |
| "Rad23b"   | 9.380557    | 9.6207435   | 9.6706935   | 9.6448355   | 9.634142    | 9.8069725   | 9.4676565   | 9.8304085   |
| "Rad50"    | 4.8303213   | 5.886918    | 6.1193166   | 5.900832    | 5.8155236   | 5.4482813   | 6.0616474   | 5.948729    |
| "Rad51ap1" | 2.6548629   | 2.6316166   | 2.556543    | 2.57482125  | 2.66269765  | 2.65460475  | 2.6382153   | 2.65756145  |
| "Rad51c"   | 2.468099    | 2.436843    | 2.3546243   | 2.4110856   | 2.456924    | 2.4482014   | 2.4586537   | 2.4431503   |
| "Rad51l1"  | 3.8768578   | 2.5760589   | 4.759766    | 2.2941723   | 6.1350856   | 4.330388    | 6.1218724   | 3.4857492   |
| "Rad51l3"  | 3.2670884   | 3.4996115   | 3.427943    | 3.4834      | 3.7995746   | 4.1921794   | 3.91783     | 3.7167869   |
| "Rad52"    | 3.2868032   | 3.24987725  | 3.3052659   | 3.3718321   | 3.40146125  | 3.5805454   | 3.5820619   | 3.4439228   |
| "Rad54l"   | 2.7265186   | 2.7013011   | 2.6212049   | 2.6501863   | 2.77094485  | 2.7343387   | 2.715232    | 2.72820775  |
| "Rad54l2"  | 2.7331002   | 3.1421983   | 2.614323    | 2.5910773   | 2.9964392   | 3.263822    | 2.8042173   | 2.7902694   |
| "Rad9"     | 3.7419438   | 4.039196    | 4.050482    | 3.7847717   | 4.022502    | 4.044584    | 4.0525904   | 3.9190168   |
| "Rae1"     | 7.7591047   | 6.9012966   | 6.778128    | 6.798944    | 7.153149    | 7.1128097   | 6.727254    | 6.9310083   |
| "Raet1a"   | 4.423249    | 6.572311    | 7.1302114   | 7.2399163   | 6.6917024   | 6.6514797   | 7.5296307   | 7.3702874   |
| "Raf1"     | 7.125739333 | 6.499170733 | 6.650741833 | 6.642053667 | 6.635368433 | 6.7671335   | 6.936284067 | 6.943546933 |
| "Rag1"     | 2.5149555   | 2.4832973   | 2.3915563   | 2.4366164   | 2.5033708   | 2.4971972   | 2.4880779   | 2.504984    |
| "Rag2"     | 2.5645924   | 2.5446522   | 2.4738564   | 2.515553    | 2.5709503   | 2.5671241   | 2.5545352   | 2.5642526   |
| "Rai1"     | 3.0026      | 3.3632575   | 3.3617385   | 3.2139956   | 3.2769307   | 3.3232864   | 3.2092086   | 3.22381685  |
| "Rai12"    | 7.6867313   | 7.709526    | 7.7725067   | 7.6310325   | 7.5241914   | 7.707973    | 7.466444    | 7.464406    |
| "Rai14"    | 5.1270455   | 4.8764785   | 5.2336639   | 5.2023453   | 4.92593885  | 5.4515042   | 5.7924595   | 5.39288425  |
| "Rai2"     | 3.3382535   | 3.3591783   | 3.1795897   | 3.1062326   | 3.5183754   | 3.9042723   | 3.7728345   | 3.4034157   |
| "Rala"     | 6.55358925  | 6.840887    | 6.76628615  | 5.83563945  | 6.91540885  | 7.00485215  | 7.37550275  | 7.0659792   |

|            |             |             |             |             |             |             |             |             |
|------------|-------------|-------------|-------------|-------------|-------------|-------------|-------------|-------------|
| "Ralb"     | 7.11578365  | 5.88802     | 7.05546325  | 6.65639735  | 6.0506062   | 5.943958    | 6.580518    | 6.517473    |
| "Ralbp1"   | 6.91134035  | 7.2532925   | 7.6524887   | 7.4038405   | 7.28435225  | 7.3755787   | 7.36556425  | 7.2783765   |
| "Ralgps2"  | 3.688607233 | 3.810181567 | 4.256678133 | 4.3545073   | 4.387721867 | 4.290288933 | 4.820475733 | 4.7394589   |
| "Raly"     | 7.2067447   | 7.0162063   | 6.944123    | 6.9443      | 7.087314    | 7.2873983   | 7.0641775   | 6.587131    |
| "Ramp1"    | 6.606346    | 6.527541    | 7.0157404   | 6.629418    | 6.651571    | 6.788341    | 6.6284018   | 5.712327    |
| "Ramp2"    | 7.2907068   | 7.703541433 | 7.463065867 | 7.639754833 | 7.7339502   | 7.506206333 | 7.604939    | 7.689915667 |
| "Ranbp1"   | 9.432276    | 9.337893    | 9.545979    | 9.001984    | 9.130045    | 9.247995    | 9.018312    | 9.056449    |
| "Ranbp10"  | 8.2290545   | 8.571475    | 7.87544535  | 8.41127515  | 8.85252565  | 8.78427635  | 8.5034915   | 8.66160015  |
| "Ranbp2"   | 9.899859    | 9.747861    | 8.93358     | 9.12123575  | 9.700948    | 9.848234    | 9.5170265   | 9.473648    |
| "Ranbp3"   | 6.7028565   | 6.5068026   | 6.8803563   | 6.824064    | 6.9715996   | 6.941303    | 6.8612013   | 6.8715563   |
| "Ranbp9"   | 8.720371    | 8.5148995   | 7.637517    | 7.9721292   | 8.0671587   | 8.3609085   | 7.9838185   | 8.1071835   |
| "Rangap1"  | 6.5043122   | 7.0889517   | 5.8607536   | 6.6310656   | 6.9842427   | 6.61201015  | 6.5181082   | 6.957433    |
| "Rangrf"   | 4.1118016   | 4.0582595   | 4.2735395   | 4.486935    | 4.0671      | 4.6217184   | 3.9982798   | 3.9080877   |
| "Rap1a"    | 9.388617    | 9.38757465  | 9.346377    | 9.3829595   | 9.382326    | 9.1742562   | 9.545335    | 9.351882    |
| "Rap1b"    | 10.224924   | 9.475275667 | 9.943092    | 9.651748667 | 9.457517667 | 9.221344333 | 9.666267    | 9.477348    |
| "Rap1gds1" | 6.98298     | 6.6886435   | 7.317531    | 7.2503076   | 7.294763    | 7.367489    | 7.21582     | 7.4379063   |
| "Rap2a"    | 4.14876915  | 4.1506784   | 4.375829    | 4.60284475  | 4.52347145  | 4.40693845  | 4.5493419   | 4.5323032   |
| "Rap2b"    | 3.1467981   | 3.2105257   | 4.4784271   | 3.9747121   | 3.67641235  | 3.46082885  | 3.834947    | 3.595936225 |
| "Rap2c"    | 8.714159167 | 8.678106    | 8.816682    | 8.652906533 | 8.499432433 | 8.275974567 | 8.797431333 | 8.666186667 |
| "Rapgef1"  | 5.474461    | 6.2530065   | 5.7370906   | 5.789241    | 6.1743526   | 6.2568927   | 6.05096     | 5.8314666   |
| "Rapgef3"  | 3.88689495  | 3.4710187   | 3.97534615  | 3.373021    | 3.45453845  | 3.4434617   | 3.63102665  | 3.45231535  |
| "Rapgef4"  | 10.2964585  | 9.74150175  | 8.3325075   | 9.028399    | 9.0094233   | 9.91146     | 8.433334    | 9.40258735  |
| "Rapgef6"  | 4.0835223   | 3.7247586   | 4.441167    | 3.7350435   | 3.690043    | 3.717658    | 3.7739239   | 4.0127654   |
| "Rarb"     | 3.496292    | 3.4577374   | 3.2364964   | 4.3513403   | 3.6865416   | 3.4711242   | 3.5943403   | 3.4670234   |
| "Rarg"     | 2.8089198   | 2.7763841   | 2.75952675  | 2.90797185  | 2.80696855  | 2.798733    | 2.80513645  | 2.7986568   |
| "Rarres2"  | 8.9125485   | 8.9148866   | 9.305528133 | 9.385703767 | 9.104303333 | 8.523194333 | 9.481855333 | 9.386834    |
| "Rars"     | 8.430644    | 8.636724    | 8.867125    | 8.381847    | 8.746962    | 8.833131    | 8.4334345   | 8.466457    |
| "Rars2"    | 5.7681804   | 7.0063357   | 6.909368    | 7.1392426   | 7.1563163   | 6.9496007   | 6.51559     | 7.274668    |
| "Rasa1"    | 7.2151859   | 7.033492433 | 7.1458721   | 7.214374367 | 6.844341467 | 7.201853333 | 7.173823467 | 7.122554133 |
| "Rasa2"    | 3.5573668   | 2.6522102   | 2.6261752   | 2.575511    | 2.6225932   | 2.8222983   | 2.6379778   | 2.5644405   |
| "Rasa3"    | 6.465033    | 5.888354    | 7.1623163   | 6.6304407   | 6.0300617   | 5.9807296   | 6.1020103   | 5.447314    |
| "Rasal2"   | 5.043912    | 4.8460298   | 5.2675548   | 5.2511134   | 5.922956    | 5.370128    | 5.12909     | 5.839428    |
| "Rasd1"    | 5.3013005   | 3.8999465   | 3.9229102   | 3.593907    | 3.9217947   | 3.992266    | 6.908278    | 3.7659018   |
| "Rasgrf1"  | 2.914659533 | 2.871286467 | 2.837890233 | 2.841638267 | 2.926711967 | 3.140294467 | 2.768296933 | 2.913002633 |
| "Rasgrp1"  | 2.382933    | 2.358365967 | 2.288988733 | 2.3201335   | 2.3783521   | 2.3742182   | 2.370123333 | 2.3680044   |
| "Rasgrp2"  | 5.739662333 | 5.4208299   | 6.3174949   | 5.665551567 | 5.820329267 | 5.510900067 | 6.226062    | 5.699914    |
| "Rasl11b"  | 6.051837    | 5.4493074   | 5.117964    | 5.3889685   | 5.538437    | 5.1530466   | 6.074485    | 5.363098    |
| "Rasl12"   | 2.80932     | 2.7972062   | 2.652295    | 2.744573    | 3.1772285   | 2.838       | 2.8049054   | 2.8168154   |
| "Rasl2-9"  | 3.9713233   | 4.1296206   | 3.5595844   | 3.5709689   | 3.6836748   | 4.5142956   | 4.7736163   | 3.9543207   |
| "Rassf1"   | 6.912343    | 5.447235    | 4.000123    | 4.660691    | 5.1136794   | 5.8561783   | 4.2438693   | 4.6563673   |
| "Rassf2"   | 3.2055385   | 3.1737995   | 3.2918756   | 3.0442586   | 3.4716642   | 3.4362066   | 2.5496397   | 2.6109567   |
| "Rassf3"   | 6.1555032   | 6.46258115  | 6.6721742   | 7.0549085   | 6.4755585   | 6.5402233   | 6.8762288   | 7.81257875  |
| "Rassf5"   | 9.2354225   | 7.8318963   | 7.9638275   | 8.1936267   | 7.169699    | 7.5825355   | 7.3844292   | 7.40040225  |
| "Rassf7"   | 5.5525236   | 6.0548706   | 6.5855966   | 6.2097244   | 5.9462185   | 6.1885033   | 5.7773876   | 6.169623    |
| "Rassf8"   | 8.7048      | 8.346183    | 7.888249    | 8.26105     | 8.228017    | 8.18688     | 8.451821    | 8.998304    |
| "Rassf9"   | 2.6455572   | 2.640696    | 2.557078    | 2.5304053   | 2.7062838   | 2.6406193   | 2.6361644   | 2.8026931   |
| "Rb1"      | 7.540555    | 7.1238036   | 6.801248    | 7.152848    | 6.9203024   | 7.5458126   | 7.379208    | 7.204632    |
| "Rb1cc1"   | 8.6940678   | 8.566839    | 7.9313967   | 8.445321    | 8.5484985   | 8.8489685   | 8.4538975   | 8.5574465   |
| "Rbbp4"    | 8.246239667 | 8.314461    | 8.205063333 | 8.174134467 | 8.0147719   | 8.139692833 | 8.094602333 | 8.8827562   |
| "Rbbp6"    | 5.557100933 | 5.3367416   | 5.182032667 | 5.485125867 | 5.483900567 | 5.978453633 | 5.571937867 | 5.529539267 |
| "Rbbp7"    | 10.9212345  | 11.064923   | 11.0262845  | 10.9610055  | 11.101444   | 11.2319395  | 11.3210045  | 11.214638   |
| "Rbbp8"    | 8.440588    | 6.7120685   | 6.92754375  | 6.02162275  | 5.557723    | 6.30254585  | 6.0631585   | 5.5072832   |
| "Rbbp9"    | 7.9260187   | 7.9071217   | 7.652649    | 7.770939    | 7.802696    | 7.7061367   | 8.489905    | 7.7932086   |
| "Rbck1"    | 5.9333673   | 6.640908    | 7.081184    | 7.077159    | 6.895439    | 6.5251436   | 6.783407    | 6.8631554   |
| "Rbfox2"   | 3.3250744   | 3.299009125 | 3.365775825 | 3.225393875 | 3.3417526   | 3.325825275 | 3.323660575 | 3.313652325 |
| "Rbfox3"   | 2.621162    | 2.6009526   | 2.50045     | 2.5517476   | 2.6317034   | 2.6124864   | 2.61694     | 2.6186461   |
| "Rbks"     | 6.4061877   | 6.99284835  | 6.62523465  | 6.671562    | 6.8568305   | 7.10310475  | 6.60615655  | 6.5470228   |
| "Rbl1"     | 2.9233123   | 2.62050775  | 4.3205082   | 3.489566    | 3.3017095   | 3.1994388   | 3.83081915  | 3.19446695  |
| "Rbl2"     | 5.63821215  | 5.58897065  | 5.2962832   | 5.7932242   | 5.353107    | 5.43013265  | 5.46404185  | 5.5717803   |
| "Rbm12"    | 4.36417055  | 4.6910823   | 4.7370205   | 4.63719985  | 4.7772665   | 4.40050715  | 5.09064365  | 4.90006805  |
| "Rbm14"    | 5.091495917 | 5.53108     | 5.791696383 | 5.473259367 | 5.6726964   | 5.410931283 | 5.707746817 | 5.569191883 |
| "Rbm15"    | 7.953126    | 7.696895    | 8.030777    | 7.7051516   | 8.257238    | 8.048574    | 8.035116    | 7.98106     |
| "Rbm15b"   | 3.6863391   | 3.2588325   | 3.1614559   | 2.930964    | 3.4046466   | 3.5494921   | 3.4507163   | 3.6533644   |
| "Rbm17"    | 10.066223   | 9.467804    | 9.227964    | 9.209749    | 9.209533    | 9.229185    | 9.249109    | 9.189354    |
| "Rbm18"    | 5.6872085   | 5.5407231   | 5.0047658   | 4.9750326   | 4.98971585  | 5.1172408   | 5.1847558   | 4.72708895  |
| "Rbm19"    | 3.3013015   | 4.102068    | 3.212993    | 3.1838975   | 3.4343822   | 3.2930436   | 3.0805106   | 3.2179039   |
| "Rbm22"    | 8.667971    | 8.184109    | 7.9837513   | 7.813337    | 7.944345    | 8.132908    | 8.116949    | 7.860736    |
| "Rbm25"    | 6.1358838   | 6.0649674   | 5.78669216  | 5.77624214  | 6.21956818  | 6.00026574  | 6.05576762  | 5.99705248  |
| "Rbm26"    | 7.196553    | 7.040709    | 6.9056807   | 7.094739    | 7.246013    | 7.2440467   | 7.56407     | 7.152161    |
| "Rbm28"    | 6.35909365  | 5.99323795  | 6.2231623   | 5.9482963   | 5.9600983   | 6.42127525  | 6.2249195   | 5.97118     |
| "Rbm38"    | 2.6309266   | 2.5918965   | 2.5609736   | 2.566185    | 2.6241379   | 2.6723042   | 2.6166081   | 2.608273    |
| "Rbm39"    | 8.842730286 | 7.3278508   | 6.874719529 | 6.872846814 | 7.316834457 | 7.259524171 | 7.364033    | 7.072195143 |
| "Rbm43"    | 6.095468    | 5.8292956   | 7.2464905   | 6.805264    | 5.1847267   | 5.0196476   | 6.1640816   | 5.5276403   |
| "Rbm47"    | 4.75768725  | 5.21900565  | 5.01782405  | 5.39009165  | 5.423448    | 4.908185    | 5.250069    | 5.5938706   |
| "Rbm4b"    | 3.67172605  | 3.64141515  | 3.603525    | 3.6230637   | 3.4904064   | 3.80749155  | 3.7572745   | 3.5703452   |
| "Rbm5"     | 6.36320545  | 6.97871625  | 7.2075497   | 7.224545625 | 7.306099675 | 7.4158541   | 7.265091975 | 7.089026375 |
| "Rbm6"     | 7.0244174   | 6.5124633   | 6.8662889   | 6.66757735  | 6.34180785  | 6.6469057   | 6.44472005  | 6.5691079   |
| "Rbm7"     | 11.653221   | 11.107979   | 10.81214    | 10.992164   | 10.975195   | 11.350029   | 11.085439   | 10.944843   |
| "Rbm8a"    | 6.6974759   | 6.596632    | 6.3548302   | 6.4458282   | 6.52373125  | 6.7536792   | 6.4895285   | 6.293266    |
| "Rbms1"    | 10.165515   | 9.064864    | 9.705494    | 9.424372    | 9.1211155   | 9.192689    | 9.57155825  | 9.4962485   |
| "Rbms2"    | 4.178643    | 4.370917    | 4.5437036   | 4.4492517   | 4.4489737   | 4.438304    | 4.681195    | 4.4353056   |

|          |             |             |             |             |             |             |             |             |
|----------|-------------|-------------|-------------|-------------|-------------|-------------|-------------|-------------|
| "RbmX"   | 3.301593775 | 3.888554225 | 3.70743955  | 3.561032775 | 3.7336683   | 3.781257275 | 3.7682993   | 3.692227725 |
| "RbmX2"  | 2.4297514   | 2.3901877   | 2.5735722   | 2.3696659   | 2.4132793   | 2.399742    | 2.446403    | 2.3977034   |
| "RbmX1"  | 8.482668    | 8.845346    | 9.201172    | 8.693985    | 8.967838    | 8.9621105   | 9.099129    | 9.055918    |
| "Rbp1"   | 8.611767    | 7.6880336   | 11.0714035  | 9.365133    | 8.824474    | 8.345375    | 10.166954   | 9.430117    |
| "Rbp4"   | 14.455732   | 14.818546   | 14.490482   | 14.677167   | 14.876837   | 14.835561   | 14.552694   | 14.697438   |
| "Rbpj"   | 3.1818724   | 3.4825222   | 3.05007025  | 3.29104305  | 3.12898955  | 3.18090085  | 3.17956895  | 3.20432795  |
| "Rbpms"  | 7.29302225  | 6.859323675 | 6.343138425 | 6.248140425 | 6.444552    | 7.005339125 | 6.6555198   | 6.56029575  |
| "Rc3h2"  | 5.48877035  | 5.5482064   | 5.50239865  | 5.57408315  | 5.63188755  | 5.7056708   | 5.6595802   | 5.59605775  |
| "Rcan1"  | 6.54724585  | 5.42021975  | 5.7668429   | 5.80309815  | 5.698241    | 5.555152    | 5.45832035  | 5.2525022   |
| "Rcan2"  | 5.998785    | 5.8535185   | 4.7283444   | 6.00476     | 6.428125    | 5.5422125   | 4.8688884   | 5.833411    |
| "Rcan3"  | 2.37100065  | 2.2189082   | 2.4236552   | 2.3156371   | 2.3628536   | 2.365252    | 2.5389128   | 2.3483903   |
| "Rcbb1"  | 8.084379    | 8.907586    | 7.6994753   | 8.364773    | 8.77973     | 8.655502    | 8.3245735   | 8.627266    |
| "Rcbb2"  | 5.374450467 | 5.882753067 | 5.510990867 | 5.480979733 | 5.6612661   | 5.277359833 | 5.7235814   | 5.456067333 |
| "Rcc1"   | 3.322596    | 3.3953617   | 4.1061397   | 3.2981982   | 3.319956    | 3.3306212   | 3.3380733   | 3.32686     |
| "Rcc2"   | 4.68408705  | 4.7609537   | 4.72955     | 4.4084492   | 4.59316375  | 5.1343037   | 4.45052885  | 4.7901398   |
| "Rccd1"  | 4.3919864   | 4.674238    | 4.8175006   | 4.4920397   | 4.815379    | 4.5304394   | 4.524104    | 4.524235    |
| "Rce1"   | 4.7029285   | 4.038845    | 4.41888     | 3.9665372   | 3.513033    | 5.269452    | 4.140994    | 3.9725876   |
| "Rchy1"  | 9.551659    | 8.8366585   | 8.063139    | 8.419377    | 8.356669    | 8.826245    | 8.325203    | 8.509603    |
| "Rcl1"   | 13.442584   | 12.127443   | 10.651005   | 11.097368   | 10.65521    | 11.381929   | 10.779778   | 11.305872   |
| "Rcn1"   | 7.6493134   | 7.165011    | 7.3979983   | 7.589647    | 7.7468414   | 7.4443083   | 7.700434    | 7.4800653   |
| "Rcn2"   | 8.189625    | 8.1144705   | 9.006394    | 7.9331007   | 7.7916064   | 7.611022    | 8.388834    | 7.633917    |
| "Rcn3"   | 4.376402    | 4.2963753   | 4.4444942   | 4.3852897   | 4.441307    | 4.548832    | 4.4412465   | 4.1166024   |
| "Rcor1"  | 5.945965633 | 5.820571567 | 5.512729167 | 5.6022115   | 5.653683567 | 6.184100467 | 5.8377837   | 5.883218067 |
| "Rcor2"  | 2.825858    | 2.7914703   | 2.672038    | 2.772929    | 2.809103    | 2.8029494   | 2.81311     | 2.911186    |
| "Rcor3"  | 2.9800882   | 2.8141098   | 2.9292958   | 2.9490788   | 2.9867485   | 3.0760405   | 2.9904535   | 2.975826    |
| "Rcsd1"  | 6.6471953   | 5.465053    | 5.922128    | 5.1331277   | 5.5098186   | 5.7777104   | 5.3101974   | 4.9409623   |
| "Rd3"    | 2.6075466   | 2.581449    | 2.5020583   | 2.5394528   | 2.6240556   | 2.6032996   | 2.6009107   | 2.6249661   |
| "Rdbp"   | 6.537557    | 7.55999     | 6.9870186   | 6.957028    | 6.8924894   | 7.467556    | 6.910968    | 6.933961    |
| "Rdh1"   | 2.389296    | 2.3929384   | 2.2866528   | 2.3191628   | 2.381119    | 2.37581     | 2.3766406   | 2.3693144   |
| "Rdh10"  | 8.253344    | 8.317658    | 8.931209    | 9.048175    | 9.089285    | 8.35107     | 9.178106    | 8.831874    |
| "Rdh11"  | 8.86773485  | 8.110264    | 9.931794    | 8.313431    | 6.2224412   | 6.3441367   | 7.78599925  | 8.0547688   |
| "Rdh12"  | 2.5497768   | 2.5218897   | 2.4502847   | 2.4849992   | 2.6748195   | 2.538735    | 2.532331    | 2.543369    |
| "Rdh13"  | 6.2342405   | 5.4731083   | 5.167046    | 4.199011    | 5.600422    | 5.4866514   | 4.460498    | 5.6654863   |
| "Rdh14"  | 6.639054    | 7.1351045   | 6.941265    | 6.6360045   | 7.4098115   | 7.6442105   | 7.4257965   | 7.1848275   |
| "Rdh16"  | 7.582469    | 8.577204    | 7.2297626   | 8.362252    | 7.9614043   | 7.171887    | 8.181566    | 8.03093     |
| "Rdh5"   | 6.3163705   | 6.981317    | 7.447513    | 7.4093547   | 7.258737    | 7.002427    | 7.7659965   | 7.6332636   |
| "Rdh7"   | 13.256172   | 13.433209   | 13.514441   | 13.709176   | 13.723481   | 13.679645   | 13.77012    | 13.803015   |
| "Rdh9"   | 10.262818   | 10.612541   | 10.953482   | 10.16132    | 11.661314   | 9.564687    | 11.682567   | 11.114563   |
| "Rdm1"   | 5.853938    | 5.9587626   | 5.387074    | 6.423734    | 6.068898    | 6.0590396   | 6.327321    | 6.6548715   |
| "Rdx"    | 10.32884267 | 10.19103167 | 10.62677933 | 10.96275967 | 10.619536   | 10.71527633 | 11.4808285  | 11.28020667 |
| "Rec8"   | 2.5472353   | 2.819033    | 2.4608417   | 2.4142342   | 2.5576954   | 2.531129    | 2.5418909   | 2.6055431   |
| "Reck"   | 5.2136483   | 4.7327247   | 4.8522363   | 4.918339    | 5.025097    | 4.453202    | 5.5252194   | 5.3306537   |
| "Recql"  | 3.748409033 | 3.949299733 | 3.777135833 | 3.824866267 | 3.829286533 | 3.817471367 | 4.259364533 | 3.8177896   |
| "Recql4" | 2.3235316   | 2.3428907   | 2.3112464   | 2.3019197   | 2.3622522   | 2.3541083   | 2.3673074   | 2.4302807   |
| "Recql5" | 3.3034294   | 3.3151422   | 3.2690916   | 3.3778043   | 3.34287     | 3.419444    | 4.1729918   | 3.5103002   |
| "Reep1"  | 2.9723108   | 2.9467746   | 3.13638135  | 2.92950665  | 2.9712064   | 2.96782685  | 3.0488299   | 2.98278675  |
| "Reep2"  | 2.31875     | 2.27875     | 2.3291473   | 2.2652001   | 2.3899016   | 2.5409098   | 2.1944077   | 2.2982903   |
| "Reep3"  | 9.569396375 | 10.40130438 | 9.342679875 | 9.70544125  | 10.23158175 | 10.458818   | 10.13125425 | 9.783433    |
| "Reep5"  | 7.116333667 | 6.948784    | 7.675923667 | 7.322571733 | 7.066833767 | 6.898510033 | 7.055696867 | 7.076454367 |
| "Reep6"  | 10.768045   | 12.369722   | 11.704392   | 12.462304   | 12.59369    | 12.205349   | 12.440488   | 12.324113   |
| "Reg3a"  | 2.4000793   | 2.3730483   | 2.3283722   | 2.3503911   | 2.391542    | 2.3839698   | 2.3813338   | 2.3766875   |
| "Reg3b"  | 2.4029677   | 2.3631341   | 2.3390512   | 2.3468456   | 2.3855395   | 2.3755884   | 2.389938    | 2.3725433   |
| "Reg4"   | 2.6816463   | 2.6547937   | 2.614883    | 3.145107    | 2.726686    | 2.6797419   | 2.6525989   | 2.6537852   |
| "Rel"    | 5.0446186   | 2.6253686   | 2.577472    | 2.5763228   | 2.6836987   | 2.608922    | 2.5922322   | 2.636845    |
| "Rela"   | 9.792608    | 9.270363    | 8.705427    | 9.102388    | 8.666936    | 9.357758    | 8.701842    | 8.816225    |
| "Relb"   | 6.102461    | 2.2900603   | 4.088373    | 4.7259674   | 2.2527096   | 2.4588463   | 3.312153    | 2.4814355   |
| "Rel11"  | 9.3498485   | 7.4827465   | 8.6648      | 7.7781982   | 7.5969055   | 7.77272315  | 8.3358285   | 8.05358425  |
| "Rein"   | 9.754329    | 9.178877    | 10.06747    | 9.728315    | 9.915752    | 9.423642    | 10.308685   | 9.835317    |
| "Renbp"  | 4.7691107   | 3.7283041   | 4.1367836   | 3.9911966   | 4.227074    | 4.3806295   | 4.010927    | 4.0082245   |
| "Rep15"  | 2.4632287   | 2.46305     | 2.375127    | 2.4285026   | 2.4751341   | 2.45377     | 2.4548979   | 2.6383402   |
| "Repin1" | 7.9388265   | 7.07776645  | 7.3013345   | 7.525491    | 7.6211675   | 7.68507735  | 7.87227295  | 7.5539725   |
| "Reps1"  | 9.880522    | 8.097647    | 7.410581    | 7.6317625   | 7.5606856   | 7.9714355   | 7.3108506   | 7.7491384   |
| "Rer1"   | 8.814576    | 9.166784    | 9.450508    | 9.342457    | 9.463954    | 9.388525    | 9.54921075  | 9.4306105   |
| "Rere"   | 7.234155    | 7.243859    | 7.3284173   | 7.542196    | 7.978675    | 7.227138    | 7.5739665   | 7.787771    |
| "Rerg"   | 5.5722876   | 5.03967     | 4.931338    | 4.7632403   | 5.155244    | 5.3450656   | 5.451738    | 4.4417367   |
| "Restl"  | 4.480391433 | 4.488005867 | 4.2348976   | 4.2858616   | 4.430531    | 4.436352267 | 4.387638633 | 4.497958667 |
| "Retnla" | 2.925987    | 5.685643    | 2.5421343   | 2.5372992   | 2.614319    | 2.855643    | 2.5892026   | 2.5745988   |
| "Retsat" | 7.8211075   | 11.48813625 | 6.53874185  | 8.8938275   | 12.697012   | 12.860183   | 11.3028365  | 10.71109125 |
| "Rev1"   | 6.753871    | 7.4128084   | 7.333817    | 7.4919715   | 7.883398    | 7.4009852   | 7.3143153   | 7.7703013   |
| "Rev3l"  | 5.358479    | 5.2994903   | 5.2995245   | 5.4790316   | 5.3679094   | 5.53123745  | 5.4606809   | 5.4929165   |
| "Rex2"   | 2.9796207   | 2.9494457   | 2.8049183   | 2.8694582   | 3.0211167   | 2.9762607   | 2.9549305   | 3.0129113   |
| "Rexo1"  | 6.651788    | 6.271447    | 5.7320604   | 6.066766    | 5.884014    | 6.0860844   | 5.9135175   | 6.2527566   |
| "Rexo2"  | 9.151341    | 10.228117   | 10.181492   | 10.233101   | 9.741344    | 9.89883     | 9.786387    | 9.891062    |
| "Rexo4"  | 6.7113842   | 6.73000615  | 6.8069492   | 6.4211542   | 6.87978275  | 6.9539785   | 6.8255513   | 6.7837085   |
| "Rfc1"   | 6.351294067 | 6.3866039   | 6.7213558   | 6.8512091   | 6.2676255   | 6.630807233 | 6.665890867 | 6.7352284   |
| "Rfc2"   | 6.9250865   | 6.8723907   | 7.088462    | 7.058253    | 6.75909     | 6.775551    | 6.915443    | 7.003762    |
| "Rfc3"   | 4.27909865  | 4.2092836   | 4.68108035  | 4.47186375  | 3.95976165  | 4.25053575  | 4.88350035  | 4.74023865  |
| "Rfc4"   | 4.2582261   | 4.28917065  | 5.0055329   | 4.72470215  | 4.3518475   | 4.822994    | 5.78429525  | 5.19102905  |
| "Rfc5"   | 3.7577899   | 3.99644     | 5.0036874   | 5.7620106   | 4.3658805   | 4.213631    | 5.3318467   | 5.056697    |
| "Rffi"   | 5.6173016   | 5.52165115  | 5.5681072   | 5.58652425  | 5.74082605  | 5.7271238   | 5.7903165   | 5.700052    |
| "Rfk"    | 7.7517189   | 7.821869033 | 8.303372467 | 7.9837419   | 7.675187167 | 7.4147709   | 7.8165411   | 7.616743567 |

|           |             |             |             |             |             |             |             |             |
|-----------|-------------|-------------|-------------|-------------|-------------|-------------|-------------|-------------|
| "Rfng"    | 5.7315607   | 6.119543    | 6.2799983   | 6.512763    | 5.822241    | 5.703618    | 6.1981344   | 6.1317444   |
| "Rftn2"   | 2.8528888   | 2.8399832   | 2.772525    | 2.8039305   | 2.8892338   | 2.8871894   | 2.8284802   | 2.8959374   |
| "Rfwd2"   | 9.746651    | 9.875916    | 9.424758    | 9.714652    | 9.989084    | 10.184179   | 9.961939    | 10.115874   |
| "Rfx5"    | 6.544756    | 6.128601    | 6.987133    | 7.204102    | 5.5121765   | 6.436895    | 6.330718    | 6.24207     |
| "Rfxank"  | 2.673967    | 2.660989    | 2.625907    | 2.6401691   | 2.6749501   | 2.6707642   | 2.6364334   | 2.676075    |
| "Rfxap"   | 6.8289824   | 6.5091734   | 6.006165    | 6.248593    | 6.5385976   | 6.580914    | 6.3487425   | 6.671179    |
| "Rg9mtd1" | 7.5177145   | 6.9381566   | 6.9321375   | 6.7361298   | 7.385315    | 7.6603217   | 7.610734    | 7.217317    |
| "Rg9mtd2" | 4.18109715  | 4.1645112   | 4.13428375  | 4.25476475  | 4.2624332   | 4.47474935  | 4.2863666   | 4.1808193   |
| "Rg9mtd3" | 4.222725    | 4.2385097   | 4.710356    | 4.631229    | 4.2942166   | 4.5030384   | 4.935875    | 4.509447    |
| "Rgl1"    | 4.29826575  | 3.7481318   | 5.3009123   | 4.4812429   | 3.7288098   | 4.12682095  | 4.81326065  | 3.838073    |
| "Rgl2"    | 7.2423697   | 6.806234    | 7.2631006   | 7.446409    | 7.293131    | 7.5043817   | 7.2514157   | 7.2391424   |
| "Rgl3"    | 4.131335    | 4.996827    | 4.4518332   | 4.8722963   | 4.885293    | 5.4274664   | 4.902845    | 4.8827286   |
| "Rgn"     | 12.595463   | 12.619102   | 13.320177   | 13.657315   | 13.634049   | 11.677625   | 14.156556   | 13.785391   |
| "Rgnef"   | 2.3683922   | 2.343335    | 2.2789378   | 2.3123481   | 2.3731687   | 2.3597527   | 2.3633564   | 2.3502374   |
| "Rgs1"    | 9.372235    | 7.4019914   | 8.049224    | 6.409061    | 6.089135    | 7.1096687   | 4.9385977   | 6.0403714   |
| "Rgs10"   | 6.214541    | 4.664852    | 7.0172696   | 6.509135    | 5.4538093   | 5.234773    | 5.8967233   | 5.512024    |
| "Rgs14"   | 2.5266137   | 2.4827647   | 2.6907182   | 2.4673276   | 2.506325    | 2.5577385   | 2.5075717   | 2.653569    |
| "Rgs16"   | 8.6693858   | 9.615943233 | 6.926927567 | 9.633083333 | 11.16020767 | 9.1463542   | 9.379949667 | 9.867368    |
| "Rgs18"   | 2.9363378   | 2.80526625  | 2.91813625  | 2.7440828   | 2.8620539   | 2.97635115  | 2.8402257   | 2.82899125  |
| "Rgs19"   | 5.6719351   | 4.4862125   | 6.01268115  | 5.3037329   | 4.8972798   | 4.8089823   | 5.58025645  | 4.66668035  |
| "Rgs2"    | 8.451926    | 7.40216735  | 8.2135308   | 7.41261005  | 6.7646088   | 6.67296275  | 7.76785225  | 6.60481475  |
| "Rgs20"   | 2.448422    | 2.4202232   | 2.3423605   | 2.3775225   | 2.4570167   | 2.5402775   | 2.4319417   | 2.446203    |
| "Rgs3"    | 3.313573325 | 3.87427425  | 3.3158823   | 3.637728925 | 3.376293425 | 3.575563125 | 3.284465975 | 4.041598325 |
| "Rgs4"    | 2.308214    | 2.541015    | 2.28875     | 2.2515407   | 2.303834    | 2.299758    | 2.3076882   | 2.2918634   |
| "Rgs5"    | 5.3325609   | 5.254645825 | 5.330644675 | 5.192210525 | 5.25068835  | 6.13996265  | 5.7044508   | 5.073364775 |
| "Rgs6"    | 2.3949077   | 2.3789024   | 2.3372838   | 2.3487523   | 2.4031084   | 2.3968868   | 2.3934824   | 2.390766    |
| "Rgs7"    | 3.6168113   | 3.1348794   | 6.452099    | 5.110545    | 3.20417     | 3.5855012   | 3.161412    | 3.141485    |
| "Rgs9"    | 2.566552    | 2.5538943   | 2.5216856   | 2.5241418   | 2.5601885   | 2.550105    | 2.5400202   | 2.5412493   |
| "Rhag"    | 2.2824673   | 2.3543837   | 2.2837954   | 2.3158197   | 2.3787253   | 2.376018    | 2.3720677   | 2.366616    |
| "Rhbdd1"  | 6.801357    | 7.012767    | 6.6008368   | 7.0541677   | 7.031118    | 7.1991568   | 7.0312505   | 7.2011156   |
| "Rhbdd2"  | 3.174089333 | 3.3554488   | 2.7922108   | 2.897818733 | 3.214539333 | 3.828566733 | 2.804008967 | 2.939722633 |
| "Rhbdd3"  | 4.3980547   | 4.546712467 | 4.507777933 | 4.5163878   | 4.6302374   | 4.5796311   | 4.515990567 | 4.515758    |
| "Rhbdff1" | 5.50769     | 5.4833612   | 5.049346    | 4.557722    | 4.7856145   | 4.7797813   | 4.7932      | 4.0627337   |
| "Rhbdl3"  | 2.7837217   | 2.7495153   | 2.6988213   | 2.724209    | 2.7831326   | 2.778962    | 2.76997     | 2.760606    |
| "Rhbg"    | 5.0396233   | 6.2422185   | 6.1140532   | 7.5237355   | 6.117365    | 4.246437    | 5.7923803   | 6.0021257   |
| "Rheb"    | 10.928021   | 10.916278   | 10.576668   | 10.898668   | 10.9164915  | 11.283249   | 11.0904     | 11.044383   |
| "Rhebl1"  | 2.2486348   | 2.217157    | 2.1963162   | 2.3393688   | 2.1303248   | 2.323684    | 2.2510624   | 2.2502434   |
| "Rho"     | 2.5231261   | 2.4770079   | 2.444229    | 2.4712636   | 2.5115814   | 2.5087798   | 2.5130773   | 2.5018718   |
| "Rhoa"    | 10.4772035  | 10.1409805  | 10.285376   | 10.336959   | 10.221944   | 10.2668985  | 10.2129565  | 10.212412   |
| "Rhob"    | 8.924013    | 7.598285    | 7.847256    | 7.8777122   | 8.0574465   | 8.060853    | 7.571683    | 7.0905356   |
| "Rhobtb2" | 2.6546974   | 2.7663434   | 2.3326893   | 3.0100396   | 2.6366882   | 2.6858582   | 2.6317778   | 2.6090956   |
| "Rhoc"    | 5.92159605  | 4.73888385  | 5.4274329   | 4.43570125  | 4.78826885  | 5.25497865  | 5.10368315  | 4.80860885  |
| "Rhod"    | 8.805705    | 7.6210794   | 7.857446    | 7.986765    | 6.3238397   | 7.287639    | 7.5473075   | 7.339672    |
| "Rhog"    | 6.934083    | 5.8043404   | 6.850167    | 6.6761007   | 5.9438705   | 6.0987453   | 6.180136    | 5.929343    |
| "Rhoh"    | 2.9016104   | 2.8389869   | 2.8427863   | 2.8517582   | 2.8870661   | 2.8772874   | 2.8897364   | 2.8849683   |
| "Rhøj"    | 6.7077446   | 5.601072    | 6.7315874   | 6.4710298   | 5.7851987   | 6.125095    | 6.5248766   | 5.9702063   |
| "Rhoq"    | 7.6145754   | 8.692334    | 8.435308    | 8.521473    | 8.409399    | 8.51483     | 8.011889    | 8.3408985   |
| "Rhot1"   | 8.455136    | 9.136411    | 8.543169    | 8.782072    | 8.99531     | 8.918823    | 8.64568     | 8.9257555   |
| "Rhot2"   | 4.811467    | 4.778099    | 4.83965     | 4.7347894   | 4.805961    | 5.1332407   | 5.171917    | 5.191453    |
| "Rhous"   | 9.888446    | 8.69842625  | 9.3998285   | 9.125144    | 7.969014    | 9.194232    | 9.242232    | 8.9833965   |
| "Rhox4b"  | 6.976019    | 6.8065796   | 7.289561    | 6.1323566   | 7.5227785   | 7.1678824   | 6.4860325   | 6.2326026   |
| "Rhox5"   | 2.6232731   | 2.5780103   | 2.7801821   | 2.7634976   | 2.6093643   | 2.608462    | 2.4801605   | 2.6024203   |
| "Rhox6"   | 2.5069308   | 2.4877074   | 2.396202    | 2.4499905   | 2.5291333   | 2.4986372   | 2.4919581   | 2.4917073   |
| "Rhpn2"   | 7.139968    | 6.424303    | 7.23642285  | 6.676677    | 6.88359085  | 6.68753835  | 7.534601    | 6.8934998   |
| "Rian"    | 2.373451733 | 2.5131067   | 2.4550523   | 3.963899367 | 2.5517361   | 2.528693033 | 2.528151433 | 2.7676253   |
| "Ribc1"   | 3.659853    | 3.554794    | 3.5885332   | 3.77882     | 3.2326853   | 3.6470366   | 3.89743     | 3.6485887   |
| "Ric8"    | 7.686877    | 7.5344195   | 7.1101985   | 7.30210435  | 7.882558    | 7.78505065  | 7.07353815  | 7.2440068   |
| "Rif1"    | 5.6317565   | 5.79839215  | 5.3231064   | 5.2748344   | 5.302242    | 5.77549235  | 5.6153275   | 5.078898    |
| "Rilpl1"  | 4.7123547   | 4.36236     | 4.940676    | 4.150323    | 4.904743    | 4.4404755   | 4.571865    | 4.3069153   |
| "Rilpl2"  | 8.063174    | 6.800516    | 7.402846    | 7.264683    | 6.5934124   | 6.8893795   | 6.759691    | 6.891618    |
| "Rimklb"  | 2.957578275 | 2.982342275 | 2.86061725  | 2.929572175 | 3.099268575 | 3.0309297   | 2.93268375  | 3.0248412   |
| "Rims2"   | 3.1726356   | 3.181612    | 3.0323822   | 3.1037643   | 3.2408986   | 3.3440328   | 3.1113408   | 3.2612324   |
| "Rin1"    | 3.07143     | 3.0356784   | 2.8867173   | 2.9166114   | 3.1001406   | 3.130827    | 2.9799237   | 3.1018767   |
| "Rin2"    | 7.3404045   | 6.7955046   | 7.1803718   | 7.194803    | 6.823036    | 6.8508644   | 8.156582    | 7.040942    |
| "Ring1"   | 5.7586155   | 5.7205706   | 5.718734    | 5.710908    | 5.4448195   | 5.894373    | 5.7480507   | 5.7281103   |
| "Riok1"   | 5.332615033 | 4.6888721   | 4.792769167 | 4.536120167 | 4.821255567 | 4.718613533 | 4.696438667 | 4.477844633 |
| "Riok2"   | 7.38214725  | 7.775965    | 7.2639668   | 7.6972225   | 7.6499425   | 7.519686    | 7.49103785  | 7.7458515   |
| "Riok3"   | 7.90329875  | 8.16416115  | 7.60325805  | 7.8540009   | 8.01644465  | 8.24927615  | 7.7791145   | 7.9411577   |
| "Ripk1"   | 7.860723    | 7.1651295   | 7.713408    | 7.2802372   | 7.5219493   | 7.5326715   | 6.938162    | 7.31307615  |
| "Ripk2"   | 3.3319746   | 3.2319853   | 3.7177146   | 4.66735735  | 3.2861593   | 3.29408285  | 3.3310274   | 3.44794025  |
| "Ripk3"   | 5.5959015   | 3.4807537   | 5.351164    | 4.803892    | 4.200614    | 4.14189     | 4.3953013   | 4.3779607   |
| "Ripk4"   | 6.7488525   | 6.09483675  | 4.82943785  | 4.80215455  | 5.53474495  | 5.4261491   | 5.14142915  | 5.125873    |
| "Ripply3" | 4.5275226   | 4.073149    | 3.91107     | 4.24442     | 4.2287154   | 4.2024207   | 4.539757    | 3.7144785   |
| "Rit1"    | 5.7360531   | 5.310783    | 5.838602    | 5.68292665  | 5.253824    | 5.4915338   | 5.34120165  | 5.3727852   |
| "Rit2"    | 2.765507533 | 2.744587    | 2.6696978   | 2.701504333 | 2.7832959   | 2.776078767 | 2.746407267 | 2.7758568   |
| "Rlbp1"   | 2.6712546   | 2.645514    | 2.5470724   | 2.6072292   | 2.6679506   | 2.6791174   | 2.6586695   | 2.6742465   |
| "Rlf"     | 7.8210073   | 7.472087    | 6.297946    | 6.5647554   | 6.8149695   | 7.2476635   | 7.008255    | 7.096542    |
| "Rlin"    | 5.35993105  | 5.515527625 | 5.32259585  | 5.219712375 | 5.5314319   | 5.6443909   | 5.33853725  | 5.37797765  |
| "Rln1"    | 2.5125284   | 2.4863377   | 2.3952558   | 2.4637775   | 2.506998    | 2.5049286   | 2.4956908   | 2.4945464   |
| "Rml1"    | 7.778302    | 7.72185755  | 7.6857695   | 7.85352925  | 7.9407127   | 8.00111525  | 7.9994335   | 7.99950275  |
| "Rmnd1"   | 6.4258986   | 6.1963644   | 6.7087417   | 7.0488024   | 6.7227116   | 6.776397    | 7.24625     | 6.8217483   |

|            |             |             |             |             |             |             |             |             |
|------------|-------------|-------------|-------------|-------------|-------------|-------------|-------------|-------------|
| "Rmnd5a"   | 10.2024555  | 10.753872   | 9.705683    | 10.574638   | 10.953018   | 10.547415   | 10.239658   | 10.559444   |
| "Rmnd5b"   | 5.237718    | 5.818257    | 5.7452803   | 5.48934     | 5.4966707   | 5.5840826   | 5.591807    | 5.2710757   |
| "Rnase1"   | 2.3762612   | 2.350315    | 2.2201722   | 2.3283029   | 2.3638556   | 2.3535628   | 2.3201833   | 2.3665788   |
| "Rnase4"   | 14.752531   | 13.342348   | 14.643502   | 14.330736   | 14.150189   | 13.250981   | 13.847582   | 14.226329   |
| "Rnaseh1"  | 6.752773    | 6.104844    | 5.9856844   | 6.230797    | 6.0249267   | 6.0680714   | 6.2380424   | 6.0160866   |
| "Rnaseh2c" | 8.496958333 | 8.2082449   | 8.029811533 | 8.139095533 | 8.641358667 | 8.498744667 | 8.719341333 | 8.572356567 |
| "Rnasek"   | 8.41616     | 8.407227    | 8.266846    | 8.411415    | 8.511809    | 8.4047575   | 8.418388    | 8.4047575   |
| "Rnase1"   | 5.5635926   | 5.27376495  | 6.5862703   | 5.924806    | 5.4397442   | 5.1158356   | 5.62654135  | 5.0953095   |
| "Rnaset2a" | 12.0206135  | 12.0742025  | 13.3272785  | 12.87082    | 11.9144665  | 11.5853095  | 12.354701   | 12.131624   |
| "Rnd2"     | 6.6757183   | 7.0402875   | 7.287087    | 6.9351325   | 7.073337    | 5.545941    | 6.5145273   | 6.0304036   |
| "Rnd3"     | 8.10452     | 6.41966585  | 8.6373635   | 8.008995    | 6.0699997   | 5.8401165   | 6.6521806   | 7.72893     |
| "Rnf10"    | 8.380085    | 8.448343    | 8.392228    | 8.3408      | 8.7078495   | 8.447266    | 8.477299    | 8.436565    |
| "Rnf103"   | 11.78114    | 11.235441   | 10.561624   | 10.836636   | 10.7261     | 10.827004   | 10.657789   | 10.552453   |
| "Rnf11"    | 7.353186933 | 7.881792333 | 7.457793167 | 7.622111767 | 7.578892333 | 7.7922951   | 7.601213    | 7.562343867 |
| "Rnf111"   | 7.546962    | 7.741552    | 7.772367    | 7.8869777   | 7.6713347   | 7.821119    | 7.6860523   | 7.7510047   |
| "Rnf112"   | 2.527319767 | 2.512680867 | 2.448384433 | 2.473235067 | 2.631993933 | 2.534905033 | 2.50788     | 2.512991333 |
| "Rnf113a1" | 3.2707908   | 3.146889    | 3.1151311   | 2.9986365   | 3.5140514   | 2.9847736   | 3.1716266   | 3.155517    |
| "Rnf114"   | 8.738303    | 8.309106    | 7.9581199   | 8.0942019   | 8.016523833 | 8.5766915   | 7.965508567 | 8.183161767 |
| "Rnf115"   | 9.609811    | 9.781535    | 9.593115    | 9.4442445   | 9.562634    | 9.675438    | 9.4790905   | 9.470022    |
| "Rnf121"   | 5.4367215   | 5.359874    | 5.950378    | 5.652456    | 5.62187695  | 5.40293115  | 5.6588795   | 5.65556955  |
| "Rnf123"   | 5.9606442   | 6.006117    | 6.601672    | 6.7448673   | 6.4726453   | 6.37261     | 6.5985703   | 6.6403136   |
| "Rnf126"   | 7.2764926   | 8.797147    | 6.7813287   | 7.052995    | 7.435396    | 8.44148     | 6.9844165   | 6.796229    |
| "Rnf128"   | 11.199221   | 10.943167   | 11.33901275 | 11.200477   | 11.1720015  | 10.776484   | 11.506115   | 11.222417   |
| "Rnf13"    | 9.548976    | 9.35310735  | 9.387915    | 9.665958    | 9.2435689   | 9.1819447   | 9.5759725   | 9.581821    |
| "Rnf130"   | 10.417974   | 10.2351265  | 10.624763   | 10.661216   | 10.37328    | 10.350641   | 10.352224   | 10.399622   |
| "Rnf135"   | 5.39282     | 7.068429    | 7.6248693   | 7.2330036   | 7.4297028   | 7.213651    | 7.0691996   | 7.5420866   |
| "Rnf138"   | 6.834919133 | 6.8726078   | 6.5002898   | 6.668434067 | 6.467344333 | 6.3809997   | 6.776726333 | 6.8118803   |
| "Rnf14"    | 5.7025202   | 5.4657992   | 5.7583635   | 5.789774525 | 5.57299925  | 5.3529523   | 5.61192475  | 5.604498175 |
| "Rnf141"   | 4.6844233   | 4.610296675 | 5.2355859   | 5.066940375 | 4.9159775   | 4.65634335  | 5.237841625 | 4.958114725 |
| "Rnf144a"  | 2.377917    | 2.336028    | 2.3128278   | 2.2976804   | 2.3582888   | 2.35603     | 2.3545089   | 2.381386    |
| "Rnf144b"  | 4.276118    | 2.8015406   | 2.8368871   | 2.5784855   | 2.6658435   | 2.6469197   | 2.6517332   | 2.693543    |
| "Rnf145"   | 8.657064    | 7.6797485   | 8.986293    | 8.893662    | 9.397923    | 8.945832    | 9.2464485   | 9.76339     |
| "Rnf146"   | 6.892695667 | 6.727318    | 6.134537933 | 6.250924667 | 6.114662433 | 6.6945121   | 6.184961    | 6.5426515   |
| "Rnf149"   | 11.628443   | 11.930947   | 11.585331   | 11.428181   | 11.658039   | 11.700529   | 11.198028   | 11.089018   |
| "Rnf157"   | 4.1343675   | 4.1316195   | 4.6721125   | 4.40221863  | 4.1896663   | 4.1182775   | 4.3948236   | 4.341827    |
| "Rnf166"   | 8.632642    | 8.024402    | 8.103525    | 7.861691    | 7.999181    | 8.048013    | 8.06898     | 7.8522296   |
| "Rnf167"   | 6.397875    | 6.5159945   | 6.749494    | 7.113717    | 6.9459205   | 6.363642    | 7.120204    | 7.015507    |
| "Rnf17"    | 2.4516401   | 2.419715    | 2.3405766   | 2.3754277   | 2.442684    | 2.436841    | 2.4358716   | 2.439805    |
| "Rnf181"   | 8.6200695   | 9.200829    | 9.512586    | 9.783137    | 9.536765    | 8.959589    | 9.587574    | 9.609173    |
| "Rnf185"   | 5.4380994   | 6.016713    | 6.330419    | 5.708724    | 6.198547    | 5.6486597   | 5.4534397   | 5.3579826   |
| "Rnf186"   | 2.1285803   | 2.089908    | 2.7805252   | 4.066825    | 2.1315658   | 2.2773814   | 4.6459928   | 6.369818    |
| "Rnf187"   | 8.9693425   | 9.22064675  | 9.01101375  | 9.0801085   | 9.0083065   | 9.05183975  | 8.9703065   | 8.985639    |
| "Rnf19a"   | 6.20311835  | 6.75951875  | 6.1882155   | 6.2929495   | 6.6833505   | 7.01753525  | 6.40745535  | 6.4850608   |
| "Rnf19b"   | 5.8018678   | 5.5493425   | 5.92294615  | 6.16873275  | 5.31551015  | 5.68518305  | 5.7438665   | 6.4580143   |
| "Rnf2"     | 6.390338733 | 6.126471533 | 5.872129933 | 5.910329433 | 6.0425616   | 6.332405167 | 5.9523347   | 6.100762333 |
| "Rnf20"    | 5.560936833 | 5.406964867 | 5.522935133 | 5.431639733 | 5.4358279   | 5.848250567 | 5.4492258   | 5.4401137   |
| "Rnf207"   | 2.5531633   | 2.5258868   | 2.5169182   | 2.51407     | 2.5505247   | 2.5413938   | 2.5357726   | 2.5376446   |
| "Rnf214"   | 5.58623685  | 5.98784235  | 5.26217435  | 5.4017455   | 5.2349878   | 6.27040565  | 5.46448375  | 5.4998457   |
| "Rnf219"   | 3.2816708   | 3.3098357   | 3.1788254   | 3.2226567   | 3.3904278   | 3.3187408   | 3.2627547   | 3.3024716   |
| "Rnf220"   | 5.473983    | 5.363984    | 5.317328    | 5.468584    | 5.5588284   | 5.8526397   | 5.094339    | 5.690367    |
| "Rnf25"    | 6.1505737   | 5.948798    | 6.1734457   | 5.873308    | 6.252281    | 6.1993837   | 5.9344273   | 6.0063357   |
| "Rnf26"    | 6.2724008   | 6.3857733   | 6.5241857   | 6.479916    | 6.5566217   | 6.3194295   | 6.469349    | 6.3483265   |
| "Rnf32"    | 2.6915293   | 2.6643524   | 2.565239    | 2.6628063   | 2.6959815   | 2.6930385   | 2.6579602   | 2.689857    |
| "Rnf34"    | 5.604017    | 5.5883627   | 5.949033    | 5.5876102   | 5.610417    | 5.602035    | 6.181774    | 5.496184    |
| "Rnf38"    | 6.2591124   | 5.77915     | 6.145681    | 5.9854283   | 5.843031    | 6.1116614   | 6.0589633   | 6.2127385   |
| "Rnf4"     | 7.7742715   | 7.7286635   | 7.5196277   | 7.5282885   | 7.81985615  | 7.65805315  | 7.5050962   | 7.5992725   |
| "Rnf41"    | 2.92504425  | 3.2782174   | 3.58426955  | 3.0724185   | 3.0748834   | 3.1329328   | 3.05559465  | 3.07907545  |
| "Rnf43"    | 2.8010619   | 4.531617    | 4.6225514   | 5.799826    | 6.2839184   | 4.2180147   | 6.0717235   | 5.9086165   |
| "Rnf44"    | 8.002792    | 7.8662114   | 7.653243    | 7.79774     | 7.699595    | 7.8928213   | 7.693185    | 7.834669    |
| "Rnf5"     | 7.814504    | 7.9773593   | 8.174404    | 8.451227    | 8.221888    | 7.7520304   | 8.491409    | 8.324312    |
| "Rnf6"     | 7.49121485  | 8.168851    | 8.692998    | 8.651675    | 8.7280385   | 8.8002175   | 8.721543    | 8.871956    |
| "Rnf8"     | 7.4254403   | 7.371696    | 7.1460524   | 7.3164206   | 7.253788    | 7.2067      | 7.241474    | 7.316366    |
| "Rnft1"    | 8.955308    | 8.705025    | 8.052271    | 8.50642     | 8.688488    | 9.11509     | 9.240453    | 8.802153    |
| "Rngtt"    | 4.1023998   | 4.031602    | 4.37655015  | 4.19887675  | 3.83909645  | 4.02827755  | 4.1569845   | 4.0770104   |
| "Rnh1"     | 9.225299    | 9.489745    | 9.637291    | 9.669685    | 9.838298    | 9.5552845   | 9.553614    | 9.7009115   |
| "Rnmt"     | 7.267358    | 7.1654754   | 6.6255045   | 6.7309165   | 7.121095    | 7.2294583   | 6.772708    | 6.781813    |
| "Rnmt11"   | 6.0711126   | 6.209238    | 6.0799356   | 5.418758    | 6.1641226   | 6.286943    | 5.3914957   | 5.888238    |
| "Rnp3"     | 6.955225    | 6.91612815  | 5.718882    | 6.42782475  | 6.306279    | 7.0617918   | 6.7238013   | 6.6062839   |
| "Rnp3"     | 6.5374856   | 6.309084    | 7.2121563   | 6.857584    | 6.6935463   | 6.9172997   | 6.9064155   | 7.0623636   |
| "Rnp3"     | 8.080725    | 8.379227    | 8.436887    | 8.580812    | 8.449842    | 8.348781    | 8.351585    | 8.169188    |
| "Rnp3"     | 8.14275625  | 8.11195675  | 7.75552135  | 7.751250675 | 7.86081235  | 7.778564075 | 7.59134625  | 7.876139275 |
| "Robo1"    | 4.918863    | 4.2179933   | 6.0257215   | 6.6203594   | 5.6633983   | 4.242008    | 6.355635    | 4.9988437   |
| "Robo3"    | 2.3813434   | 2.3508463   | 2.2930567   | 2.3309278   | 2.372498    | 2.3673635   | 2.3786025   | 2.365746    |
| "Robo4"    | 6.790023    | 5.5055914   | 6.0912886   | 5.6742725   | 5.9332376   | 6.297593    | 6.5990095   | 5.626438    |
| "Rock1"    | 9.141025075 | 8.601452025 | 8.687054125 | 8.895586375 | 8.647427575 | 8.92448385  | 8.8321809   | 8.74755225  |
| "Rock2"    | 5.2738458   | 5.1181798   | 4.6015295   | 4.7798451   | 4.8266669   | 4.6922873   | 4.5295887   | 4.7252367   |
| "Rod1"     | 6.482695    | 5.637492567 | 5.3619312   | 5.538935233 | 5.7269388   | 5.594130533 | 5.613894667 | 5.657725233 |
| "Rogdi"    | 5.59084     | 6.367945    | 6.3756137   | 6.036476    | 6.212781    | 6.2018795   | 6.185234    | 6.1973805   |
| "Rom1"     | 3.1822114   | 3.1489143   | 3.3041124   | 3.1332521   | 3.1754258   | 3.577707    | 3.216855    | 3.0358222   |
| "Romo1"    | 10.631484   | 11.174804   | 11.431748   | 11.311888   | 10.997661   | 10.772957   | 11.368246   | 11.284389   |
| "Ropn11"   | 7.2302327   | 7.7388325   | 8.250729    | 7.754153    | 6.930565    | 5.878163    | 7.326484    | 7.908329    |

|              |             |             |             |             |             |             |             |             |
|--------------|-------------|-------------|-------------|-------------|-------------|-------------|-------------|-------------|
| "Ror2"       | 2.6380472   | 2.6044052   | 2.5064461   | 2.574743    | 2.6278887   | 2.618431    | 2.615789    | 2.6143844   |
| "Rora"       | 7.334441233 | 6.1638478   | 5.8559412   | 6.104171367 | 5.918751933 | 6.6841101   | 6.147695867 | 6.2710766   |
| "Rorc"       | 5.1585905   | 4.58679845  | 3.9417203   | 4.99859     | 4.45781935  | 2.9260584   | 4.17391665  | 4.4335943   |
| "Ros1"       | 2.6211662   | 2.5990288   | 2.544374    | 2.5718987   | 2.642421    | 2.617518    | 2.5931144   | 2.6072257   |
| "Rp1"        | 2.7573624   | 2.740048    | 2.6285372   | 2.6669936   | 2.768311    | 2.7694411   | 2.7303789   | 2.7701333   |
| "Rp2h"       | 4.862814233 | 4.206775433 | 5.202278033 | 4.520027567 | 4.2920745   | 4.2862088   | 5.059095333 | 4.758841033 |
| "Rp9"        | 10.079082   | 10.250649   | 9.642323    | 9.750345    | 9.857039    | 9.975822    | 9.501544    | 9.860108    |
| "Rpa1"       | 8.10595835  | 8.70778575  | 8.759537    | 8.78898575  | 8.58051945  | 8.3786492   | 8.91067     | 8.52966875  |
| "Rpa2"       | 3.9359074   | 3.85178135  | 3.9277439   | 3.85880915  | 4.08656275  | 3.391559    | 4.10151435  | 4.07817695  |
| "Rpa3"       | 6.5011907   | 5.9774523   | 6.9202056   | 6.55311     | 6.023455    | 5.8470798   | 6.9884505   | 6.805497    |
| "Rpap1"      | 3.92898515  | 3.90121475  | 4.05719305  | 4.1830292   | 4.127393    | 4.27340845  | 4.3492894   | 4.02450035  |
| "Rpap2"      | 6.879442    | 6.5529923   | 6.4877057   | 6.5228233   | 6.344016    | 7.067611    | 6.3304152   | 6.3495336   |
| "Rpap3"      | 8.5246105   | 6.9990516   | 8.454456    | 7.351963    | 6.8371205   | 7.3453026   | 6.983487    | 7.1338034   |
| "Rpe"        | 6.4075956   | 6.673776467 | 6.378831833 | 6.6425578   | 6.629828067 | 6.582381667 | 6.569775533 | 6.648788333 |
| "Rpe65"      | 2.3656058   | 2.3370209   | 2.3152463   | 2.306908    | 2.3575108   | 2.35289     | 2.352179    | 2.3431478   |
| "Rpf1"       | 7.795805    | 8.216181    | 7.4632993   | 7.7229075   | 7.870084    | 8.524318    | 7.6852703   | 8.06726     |
| "Rpf2"       | 6.0822239   | 5.95936667  | 5.6651818   | 5.515489067 | 5.696488867 | 5.7941567   | 5.543181667 | 5.5285727   |
| "RpgR"       | 4.259141    | 4.652563    | 3.8479996   | 4.1836257   | 4.316508    | 4.263876    | 4.7665987   | 4.2315364   |
| "Rpgrip1"    | 4.039076175 | 4.033175875 | 3.940184925 | 4.077115175 | 4.0316547   | 4.095009825 | 4.083206775 | 4.08073785  |
| "Rpia"       | 4.778734    | 5.078377    | 6.155222    | 6.2439795   | 6.2740607   | 5.744788    | 5.8577104   | 6.293568    |
| "Rpl10a"     | 13.269514   | 13.395287   | 13.202225   | 12.986224   | 12.90899    | 13.157477   | 12.691671   | 13.030298   |
| "Rpl11"      | 12.661265   | 12.807212   | 12.439781   | 12.242243   | 12.405561   | 12.599514   | 12.245726   | 12.466573   |
| "Rpl13a"     | 12.43466025 | 12.2856025  | 12.0230695  | 11.87534375 | 11.92647313 | 12.49097113 | 11.6260865  | 11.82143938 |
| "Rpl14"      | 11.83568675 | 11.69920667 | 11.4310325  | 11.0667385  | 11.38798523 | 11.60126307 | 11.0598615  | 11.2749155  |
| "Rpl17"      | 7.507303    | 7.4369307   | 6.7956543   | 7.0076056   | 6.6770725   | 7.0738144   | 6.405202    | 6.6512256   |
| "Rpl18"      | 10.21631085 | 10.34711075 | 9.984523125 | 9.7934905   | 9.9947346   | 10.35570783 | 9.728443275 | 9.919902925 |
| "Rpl221i"    | 11.564457   | 11.427966   | 11.147312   | 11.034291   | 10.546332   | 11.168402   | 11.027071   | 11.484645   |
| "Rpl24"      | 9.41163115  | 9.4118405   | 9.160055    | 8.9925473   | 9.265005    | 9.29730485  | 9.0846452   | 9.175201    |
| "Rpl26"      | 14.1404085  | 14.109704   | 14.0715145  | 13.82895025 | 13.85711925 | 13.974492   | 13.687696   | 13.7897975  |
| "Rpl27"      | 12.11841167 | 12.10916167 | 11.93907633 | 11.690104   | 11.78462867 | 11.90618867 | 11.898225   | 11.7109345  |
| "Rpl35"      | 11.49275857 | 11.27037983 | 11.28351838 | 10.94699297 | 10.99611197 | 11.06413267 | 10.89387662 | 10.9401184  |
| "Rpl36a"     | 12.499242   | 12.56976    | 12.443411   | 12.20054    | 12.080965   | 12.344542   | 11.890303   | 12.231644   |
| "Rpl37a"     | 11.40560417 | 11.49152433 | 11.26367033 | 11.15942007 | 11.10981087 | 11.22716833 | 10.94947067 | 11.119295   |
| "Rpl38"      | 13.790133   | 13.898048   | 13.9132805  | 13.702232   | 13.574831   | 13.734428   | 13.771345   | 13.723032   |
| "Rpl39i"     | 2.7369256   | 2.7131314   | 2.5964775   | 2.6442585   | 2.757398    | 2.802878    | 2.7229576   | 2.717638    |
| "Rpl3i"      | 2.7073107   | 2.681157    | 2.6294467   | 2.6547616   | 2.7127872   | 2.6919694   | 2.7014694   | 2.7067075   |
| "Rpl4"       | 13.402468   | 13.584865   | 13.443196   | 13.152687   | 13.151049   | 13.174413   | 12.916735   | 13.138939   |
| "Rpl41"      | 8.6704085   | 9.33666025  | 9.1948331   | 8.8959724   | 9.083347825 | 9.30768975  | 9.040905325 | 9.159631    |
| "Rpl6"       | 12.717077   | 12.661147   | 12.434482   | 12.235011   | 12.34066    | 12.541236   | 12.033625   | 12.221275   |
| "Rpl7"       | 9.9755128   | 9.8464306   | 9.77821715  | 9.5989025   | 9.6596112   | 9.751738325 | 9.626388375 | 9.6435612   |
| "Rpl71i"     | 7.76602825  | 7.9434265   | 8.23913265  | 7.84184875  | 8.2688484   | 8.1429901   | 8.079427    | 7.961588    |
| "Rpl8"       | 12.629053   | 12.542667   | 12.2630415  | 12.019663   | 12.308486   | 12.500566   | 11.833314   | 12.185842   |
| "Rpl9"       | 8.05498325  | 8.07781965  | 8.0327106   | 7.9441266   | 8.054051    | 8.0955423   | 7.8948761   | 7.9567386   |
| "Rplp0"      | 13.85013    | 13.872318   | 13.840311   | 13.572379   | 13.340977   | 13.519838   | 13.0805435  | 13.487506   |
| "Rplp2"      | 13.8006525  | 13.736466   | 13.771523   | 13.356577   | 13.195366   | 13.461359   | 13.262471   | 13.339334   |
| "Rpn1"       | 9.8435802   | 10.3266424  | 10.8762832  | 10.0400506  | 10.7001048  | 10.4901376  | 10.559484   | 10.6829534  |
| "Rpn2"       | 9.064006    | 9.090962    | 9.411817    | 9.515768    | 9.322958    | 9.2440815   | 9.209488    | 9.304174    |
| "Rpp14"      | 6.97944465  | 7.02901125  | 6.45980575  | 6.5609789   | 7.1878715   | 6.9280493   | 6.560442    | 7.05554335  |
| "Rpp21"      | 7.927557    | 8.326601    | 7.826047    | 8.2373085   | 8.417418    | 8.648724    | 8.165606    | 8.373731    |
| "Rpp25"      | 2.410293    | 2.3872328   | 2.3401532   | 2.3208652   | 2.464108    | 2.406589    | 2.4127107   | 2.423657    |
| "Rpp30"      | 5.9676647   | 6.133481    | 6.139747    | 6.261438    | 5.9476395   | 6.197984    | 6.637211    | 6.4762545   |
| "Rpp40"      | 6.132874    | 6.4818225   | 5.685292    | 5.317866    | 5.9071264   | 6.3911843   | 5.8903184   | 6.80646     |
| "Rprd1a"     | 4.70979365  | 4.84967305  | 4.9389446   | 5.23254665  | 4.97126565  | 5.41091955  | 4.9641236   | 4.9883867   |
| "Rprd1b"     | 5.7042283   | 6.20192125  | 5.89266085  | 5.9944966   | 6.18059565  | 6.0819373   | 6.0772443   | 5.86085885  |
| "Rprd2"      | 3.2001076   | 3.1905472   | 3.117027    | 3.1812773   | 3.199486    | 3.2432632   | 3.21031     | 3.1953344   |
| "Rprm"       | 2.755115    | 2.7302551   | 2.7079976   | 2.675556    | 2.8248606   | 2.7552462   | 2.7260604   | 2.8394861   |
| "Rps10"      | 11.53182433 | 11.52202162 | 11.38080197 | 11.2477078  | 11.2452192  | 11.37638255 | 11.08578003 | 11.27544512 |
| "Rps11"      | 13.388507   | 13.268269   | 13.253946   | 12.983191   | 13.070471   | 13.106257   | 12.964199   | 13.16322    |
| "Rps14"      | 13.042435   | 13.1886025  | 12.91099725 | 12.77099525 | 12.829183   | 13.004333   | 12.64030225 | 12.7849555  |
| "Rps15a-ps6" | 3.5523298   | 3.483501    | 3.3277025   | 3.4179049   | 4.02231     | 3.7015028   | 3.697224    | 4.115633    |
| "Rps15a"     | 13.3742485  | 13.066636   | 13.0876255  | 12.759433   | 12.804447   | 13.054795   | 12.981752   | 12.684566   |
| "Rps17"      | 10.355345   | 9.883504183 | 9.720548617 | 9.5755008   | 9.652924133 | 9.67347305  | 9.486958183 | 9.640271283 |
| "Rps18"      | 8.350547733 | 8.304005683 | 8.157350717 | 8.0090879   | 8.142200867 | 8.176126033 | 7.900109917 | 8.023185783 |
| "Rps19"      | 7.4194298   | 7.4706973   | 7.3136193   | 7.181987    | 7.2105369   | 7.5346069   | 7.020244    | 7.2151591   |
| "Rps2"       | 13.291062   | 13.266029   | 13.30217    | 13.201535   | 13.131864   | 13.215857   | 13.174685   | 13.19582    |
| "Rps20"      | 8.8081341   | 8.92975425  | 8.618757925 | 8.49731355  | 8.5642036   | 8.561795675 | 8.55031715  | 8.515517375 |
| "Rps23"      | 13.432289   | 13.381719   | 13.359811   | 13.092525   | 13.065323   | 13.202849   | 12.852805   | 13.05073    |
| "Rps24"      | 8.41144     | 8.7302647   | 8.991273    | 9.02096015  | 8.65293825  | 9.1728557   | 9.1111403   | 8.9525985   |
| "Rps25"      | 6.0022793   | 6.520799    | 5.0454125   | 5.3834944   | 6.040838    | 6.257899    | 4.7578564   | 5.7844315   |
| "Rps27"      | 4.4025936   | 4.4660606   | 3.9061542   | 3.8726842   | 3.9940925   | 4.285619    | 3.9217317   | 3.9390879   |
| "Rps27i"     | 12.60122233 | 12.75572733 | 12.71769333 | 12.797074   | 12.85325167 | 12.86770633 | 12.9578195  | 12.9267975  |
| "Rps28"      | 14.14796767 | 13.984681   | 13.90584767 | 13.71363333 | 13.660758   | 13.91951967 | 13.587188   | 13.704982   |
| "Rps29"      | 14.188003   | 14.19710633 | 14.251479   | 14.067485   | 14.01764867 | 14.031461   | 14.04079733 | 14.03779833 |
| "Rps3"       | 12.40978    | 12.418383   | 12.310213   | 12.234151   | 12.200928   | 12.497587   | 12.00818    | 12.249395   |
| "Rps3a"      | 13.449848   | 13.480989   | 13.3469925  | 13.118804   | 13.341477   | 13.489587   | 13.047146   | 13.235992   |
| "Rps4x"      | 13.653471   | 13.611843   | 13.70459    | 13.38159    | 13.329929   | 13.371878   | 13.286402   | 13.403777   |
| "Rps4y2"     | 8.786439    | 8.80756     | 8.071394    | 7.804032    | 8.296514    | 8.052988    | 7.453947    | 8.264322    |
| "Rps5"       | 13.270137   | 13.175329   | 13.27016    | 12.745861   | 12.819082   | 13.036304   | 12.656647   | 12.80243    |
| "Rps6"       | 9.914388518 | 9.806446436 | 9.5704784   | 9.478109091 | 9.668520655 | 9.797744636 | 9.452120236 | 9.584148573 |
| "Rps6ka1"    | 4.4158206   | 3.1410482   | 5.649578    | 4.357951    | 4.596396    | 3.9708354   | 5.011579    | 4.908582    |
| "Rps6ka2"    | 3.3008095   | 3.8474415   | 3.4369916   | 3.537039    | 3.6166823   | 3.65465605  | 3.443824    | 3.4833963   |

|           |             |             |             |             |             |             |             |             |
|-----------|-------------|-------------|-------------|-------------|-------------|-------------|-------------|-------------|
| "Rps6ka3" | 5.44139815  | 5.0848099   | 5.5121651   | 5.1976006   | 5.37443975  | 5.25242635  | 5.6213444   | 5.14943425  |
| "Rps6ka4" | 6.331609    | 6.185444    | 6.434325    | 6.4352927   | 6.3177123   | 6.3070707   | 6.1570725   | 5.9765973   |
| "Rps6kb1" | 5.37760155  | 6.2389585   | 5.3774957   | 5.3680981   | 5.67592675  | 5.341204    | 5.25017215  | 5.47767155  |
| "Rps6kb2" | 3.4814289   | 4.1975365   | 3.3965576   | 3.430333    | 4.287513    | 3.6527483   | 3.4879193   | 4.032792    |
| "Rps6kc1" | 4.101194    | 3.8629422   | 3.8727975   | 4.5186386   | 3.8888671   | 3.5627158   | 3.7399936   | 3.797615    |
| "Rps7"    | 13.1978565  | 13.173336   | 13.1142045  | 12.7529205  | 12.778786   | 13.0042825  | 12.679652   | 12.735689   |
| "Rps9"    | 9.5613805   | 9.725637333 | 9.274015767 | 9.1277294   | 9.358912167 | 9.711573833 | 9.4209265   | 9.2738256   |
| "Rptn"    | 2.4647155   | 2.438055    | 2.3667264   | 2.390797    | 2.4627411   | 2.4587939   | 2.4507625   | 2.463386    |
| "Rpusd1"  | 3.9000666   | 3.8916574   | 3.8658378   | 3.8724027   | 3.8662155   | 3.8755648   | 3.896353    | 3.8763855   |
| "Rpusd4"  | 6.2973533   | 5.601561    | 6.1298943   | 6.0983567   | 5.9975667   | 6.392837    | 6.39182     | 6.349714    |
| "Rqcd1"   | 5.99625     | 5.920338    | 6.0690303   | 5.5935855   | 6.049326    | 5.5873675   | 6.131589    | 6.2502136   |
| "Rraga"   | 8.395764    | 8.772018    | 8.753123    | 8.409091    | 8.636295    | 8.696004    | 8.530867    | 8.379991    |
| "Rragc"   | 9.71694     | 9.750062    | 9.544606    | 9.665782    | 9.564289    | 9.793715    | 9.431728    | 9.660821    |
| "Rragd"   | 2.465518    | 2.44664     | 2.3709745   | 2.3958578   | 2.4710655   | 2.4913008   | 2.454073    | 2.468604    |
| "Rras"    | 8.948633    | 8.875233    | 9.502741    | 9.101421    | 8.008464    | 7.9625506   | 8.119793    | 8.501015    |
| "Rras2"   | 8.366688    | 7.72399135  | 7.46858365  | 7.54464235  | 7.2584405   | 7.8726795   | 7.54392625  | 7.31250095  |
| "Rrbp1"   | 10.85276567 | 10.89724467 | 10.84061667 | 10.59510517 | 10.87815733 | 11.044069   | 10.7440535  | 10.94245267 |
| "Rreb1"   | 5.002861933 | 5.559842267 | 5.423478267 | 5.519424367 | 5.589165833 | 5.543103333 | 5.732282333 | 5.505090667 |
| "Rrm1"    | 4.3613234   | 4.2694728   | 4.6745473   | 4.4143902   | 4.3111305   | 4.2599833   | 4.8582209   | 4.26209425  |
| "Rrm2"    | 4.2725722   | 6.6236999   | 4.689671533 | 5.562863467 | 6.5529665   | 6.092805533 | 5.099125433 | 5.225100733 |
| "Rrm2b"   | 5.316287    | 5.7911744   | 5.9560914   | 6.0275226   | 5.044477    | 5.4459414   | 6.0417094   | 5.863527    |
| "Rrn3"    | 6.271193    | 6.2833543   | 5.1634636   | 5.7314143   | 5.838492    | 6.088757    | 5.6080675   | 6.3989964   |
| "Rrnad1"  | 4.5280857   | 4.5093875   | 4.635846    | 4.4460697   | 4.842425    | 4.5670176   | 4.3637705   | 5.1887183   |
| "Rrp1"    | 7.672605    | 7.58511175  | 7.3425265   | 6.9479913   | 7.4036701   | 7.4238228   | 7.107162    | 7.2099638   |
| "Rrp12"   | 4.704745    | 4.993856    | 4.3692355   | 3.362105    | 4.891263    | 5.2221603   | 3.8614514   | 3.0688481   |
| "Rrp15"   | 7.790911    | 7.6059856   | 7.577879    | 7.146137    | 7.492963    | 7.711232    | 7.3866124   | 7.4271407   |
| "Rrp1b"   | 5.8367631   | 4.786909667 | 4.452434933 | 4.571453367 | 4.519875933 | 4.600617467 | 4.529740033 | 4.306871467 |
| "Rrp36"   | 6.8398623   | 7.0720887   | 6.4527297   | 6.487653    | 6.742894    | 6.9567947   | 6.6405706   | 6.3202467   |
| "Rrp7a"   | 4.7289505   | 4.82438     | 4.362053    | 4.4008074   | 4.4208727   | 4.195244    | 3.9635074   | 4.3609524   |
| "Rrp8"    | 5.86328     | 5.631215    | 4.865544    | 5.0370445   | 5.9450364   | 5.455764    | 4.9361367   | 5.1442366   |
| "Rrp9"    | 4.2458076   | 4.307064    | 4.278748    | 4.3597198   | 4.5075097   | 4.3785653   | 4.3835864   | 4.386481    |
| "Rrs1"    | 9.451671    | 9.081271    | 8.07789     | 8.560948    | 9.044396    | 9.497275    | 8.340491    | 8.794408    |
| "Rs1"     | 2.60579885  | 2.715587    | 2.5459032   | 2.5892736   | 2.67465745  | 2.8552384   | 2.64334285  | 2.6708405   |
| "Rsad2"   | 8.379007    | 6.547711767 | 10.84010967 | 9.019651    | 5.908727267 | 6.755831567 | 6.644807167 | 5.290378033 |
| "Rsb1"    | 6.965619    | 6.7664657   | 6.7408285   | 6.4930325   | 6.7865195   | 6.9340696   | 7.2942877   | 6.8901615   |
| "Rsl1d1"  | 8.121163    | 8.036835    | 7.5016446   | 7.323789    | 7.372839    | 7.7998357   | 7.18303     | 7.511377    |
| "Rsl24d1" | 8.654458    | 8.748578    | 8.158895    | 8.082661    | 8.386568    | 8.216428    | 7.7769537   | 8.037576    |
| "Rsph1"   | 2.9554777   | 2.921456    | 2.902059    | 2.888827    | 2.9507296   | 2.934292    | 2.9410148   | 2.9726396   |
| "Rsph3a"  | 9.25054     | 9.460394    | 9.217476    | 9.3387      | 9.352283    | 9.577515    | 9.301128    | 9.398341    |
| "Rsph6a"  | 2.6270435   | 2.616221    | 2.5297415   | 2.6226976   | 2.6174915   | 2.6248188   | 2.6083148   | 2.6211967   |
| "Rspo1"   | 2.474289    | 2.4408922   | 2.6570637   | 2.423002    | 2.4582734   | 2.4401941   | 2.4649105   | 2.4441547   |
| "Rspry1"  | 7.56865235  | 7.638272    | 7.78980685  | 7.42302605  | 7.852967    | 7.8076308   | 7.796293    | 7.4657538   |
| "Rsrc1"   | 6.59434     | 7.318037    | 6.946668    | 7.3341312   | 7.1900606   | 6.9635715   | 7.254012    | 7.090663    |
| "Rsrc2"   | 8.1567197   | 7.7081112   | 7.84088     | 7.9271915   | 7.9912908   | 7.8654035   | 8.0180608   | 7.905411    |
| "Rsu1"    | 8.352466    | 7.8197327   | 8.860594    | 8.740786    | 8.321025    | 8.188533    | 8.783176    | 8.685655    |
| "Rtcd1"   | 7.7879915   | 8.152843    | 7.78556     | 7.605785    | 7.81584     | 7.7539487   | 7.680156    | 7.6379423   |
| "Rtkn"    | 3.2070124   | 3.1861916   | 3.4240701   | 3.3002467   | 3.1767018   | 3.5125275   | 3.6607509   | 3.8216891   |
| "Rtkn2"   | 2.558629    | 2.5335584   | 2.4448853   | 2.4894433   | 2.5634823   | 2.5743337   | 2.5362234   | 2.5770206   |
| "Rtn1"    | 2.154008    | 2.0475285   | 2.2350838   | 2.735529    | 2.101499    | 2.0665917   | 2.3460813   | 2.0855398   |
| "Rtn3"    | 8.769519    | 8.821428    | 8.7074535   | 8.837659    | 8.836428    | 8.8370955   | 8.808643    | 8.9105465   |
| "Rtn4"    | 9.79546     | 9.860324    | 11.0778485  | 11.143949   | 10.568144   | 9.980615    | 11.275041   | 10.50457    |
| "Rtn4ip1" | 3.372607    | 3.48534675  | 3.5113554   | 4.1178933   | 3.59359575  | 3.38252785  | 4.11487375  | 3.6752491   |
| "Rtp3"    | 4.8331547   | 6.229727    | 5.8005214   | 6.780682    | 6.260243    | 6.323202    | 5.7945724   | 5.8187947   |
| "Rtp4"    | 6.62718785  | 6.0369748   | 8.0244588   | 7.49593165  | 6.075624    | 5.9307824   | 6.6646329   | 6.96870935  |
| "Rttm"    | 2.2755024   | 2.2534425   | 2.221274    | 2.482368    | 2.2670586   | 2.3237364   | 2.2704694   | 2.2539551   |
| "Rufy1"   | 5.760416    | 6.9725165   | 6.853211    | 6.6541166   | 6.2550955   | 6.570119    | 6.8121266   | 6.568285    |
| "Rufy2"   | 3.7436106   | 3.7633138   | 3.4094563   | 3.6643362   | 3.7463095   | 3.755976    | 3.614777    | 3.7434494   |
| "Rufy3"   | 5.95116235  | 6.07869685  | 5.8382516   | 6.213484    | 6.1521585   | 6.1214822   | 6.24688485  | 6.5585175   |
| "Rundc3a" | 2.5582335   | 2.6503935   | 2.491754    | 2.4733248   | 2.5446212   | 2.663359    | 2.520032    | 2.52889     |
| "Runx1"   | 2.956689175 | 2.65051045  | 3.14399805  | 2.6441228   | 2.609136025 | 2.5718013   | 2.774542225 | 2.429142575 |
| "Runx1t1" | 2.6591454   | 2.6223235   | 2.539318    | 2.5771914   | 2.6621263   | 2.6969175   | 2.6377745   | 2.6480243   |
| "Runx2"   | 2.512450033 | 2.487284533 | 2.413629967 | 2.477719433 | 2.512103233 | 2.502084067 | 2.4907581   | 2.500060067 |
| "Runx3"   | 2.5798333   | 2.544227    | 2.515842    | 2.5317187   | 2.5634434   | 2.5596557   | 2.5648057   | 2.5486836   |
| "Rusc1"   | 4.887807775 | 5.4994336   | 4.42953115  | 4.47440385  | 4.75150745  | 5.325905025 | 4.22851915  | 4.372725575 |
| "Rusc2"   | 5.90844475  | 4.0234712   | 3.53835095  | 3.5447587   | 3.7583091   | 4.10855315  | 3.53787895  | 3.4933947   |
| "Ruvb1"   | 7.134307    | 7.3435187   | 7.5749207   | 7.1538453   | 7.2394547   | 7.460358    | 7.2061954   | 7.295388    |
| "Ruvb12"  | 2.4231868   | 2.4174619   | 2.4025383   | 2.4036038   | 2.4273624   | 2.4746308   | 2.4410098   | 2.421658    |
| "Rwdd2b"  | 5.8690124   | 5.8910007   | 5.820228    | 6.293038    | 5.887381    | 6.2750854   | 6.267522    | 6.187788    |
| "Rwdd3"   | 3.91871615  | 4.1016345   | 4.2142947   | 4.2261705   | 4.3531455   | 4.2172359   | 5.379632    | 4.4526998   |
| "Rwdd4a"  | 7.719706    | 8.1304442   | 7.848084    | 7.9045645   | 8.27024325  | 8.2885385   | 7.8029642   | 7.73435325  |
| "Rrxr"    | 7.4114311   | 7.797184    | 7.682011    | 7.85210435  | 8.012362    | 7.78332835  | 7.64763615  | 7.928333    |
| "Rrxr"    | 7.625697    | 7.750398    | 7.272397    | 7.5234094   | 7.640142    | 8.318353    | 7.484544    | 7.5055666   |
| "Rrxrg"   | 2.911886    | 3.1594684   | 3.1898818   | 3.4133556   | 3.1855142   | 2.9902      | 3.3580341   | 3.0848627   |
| "Rybp"    | 2.8159552   | 2.5961165   | 2.5486684   | 2.566458    | 2.6143205   | 2.6081483   | 2.6184793   | 2.606662    |
| "Ryk"     | 7.98531685  | 7.6776345   | 6.7429858   | 7.13258385  | 7.45309085  | 7.445873    | 7.092829    | 7.30013575  |
| "Ryr2"    | 2.4551353   | 2.4274294   | 2.3557813   | 2.3832662   | 2.4737165   | 2.4482327   | 2.443371    | 2.4370587   |
| "S100a1"  | 7.58382385  | 8.52118085  | 8.2571367   | 8.63900275  | 7.98910915  | 7.983854    | 8.18225715  | 8.4873475   |
| "S100a10" | 10.40369    | 11.7950225  | 11.9512135  | 11.5999355  | 11.4767425  | 10.872759   | 11.887838   | 10.8894865  |
| "S100a13" | 8.609824    | 8.7057295   | 8.534064    | 8.786959    | 8.236975    | 8.304038    | 8.4172535   | 8.778439    |
| "S100a16" | 7.558106    | 7.9631495   | 8.5386305   | 8.227202    | 7.9790835   | 7.6628423   | 8.386342    | 8.035       |
| "S100a4"  | 3.6670165   | 2.9477286   | 5.444686    | 3.3079011   | 2.6885672   | 2.447789    | 3.059924    | 3.0714076   |

|           |             |             |             |             |             |             |             |             |
|-----------|-------------|-------------|-------------|-------------|-------------|-------------|-------------|-------------|
| "S100a5"  | 2.6623733   | 2.6287935   | 2.531478    | 2.5979257   | 2.8646421   | 2.6424441   | 2.646906    | 2.6363778   |
| "S100a6"  | 7.9694037   | 6.670146    | 8.217231    | 6.5220876   | 5.9693437   | 5.576574    | 6.5351434   | 6.0005064   |
| "S100a8"  | 11.82948    | 7.7559867   | 11.446397   | 9.3766575   | 8.088667    | 10.33955    | 8.7413025   | 7.354549    |
| "S100a9"  | 11.7728615  | 7.634334    | 11.411658   | 9.405575    | 7.731358    | 10.01422    | 8.637215    | 7.5661936   |
| "S100pbp" | 7.1440945   | 7.117454    | 6.6927667   | 6.81655     | 6.494441    | 7.339655    | 6.8901424   | 6.850562    |
| "S1pr1"   | 6.8852477   | 5.2148104   | 7.9115086   | 7.108179    | 7.05698     | 6.7406497   | 8.115159    | 7.1068363   |
| "S1pr4"   | 3.1043777   | 3.1276267   | 3.0651903   | 3.0854414   | 3.1404138   | 3.1149929   | 3.126768    | 3.1220038   |
| "S1pr5"   | 3.8576858   | 4.4744687   | 5.1808844   | 6.369714    | 4.7954273   | 5.9810963   | 5.700293    | 5.1440535   |
| "Saa1"    | 15.23700475 | 14.3860565  | 15.148161   | 14.59309175 | 12.8588935  | 14.8401975  | 11.8925255  | 14.391131   |
| "Saa2"    | 15.480188   | 13.445273   | 15.520383   | 13.845027   | 11.481885   | 14.28062    | 10.272667   | 13.778924   |
| "Saa3"    | 12.7428465  | 10.804969   | 13.738649   | 11.2528925  | 10.675969   | 10.78066    | 9.555825    | 9.986134    |
| "Saa4"    | 11.7904985  | 10.3016125  | 12.046684   | 12.1669095  | 10.5155415  | 10.3754802  | 10.6238275  | 11.0918685  |
| "Saal1"   | 3.1818048   | 3.049290733 | 3.295596533 | 3.128490033 | 3.133497667 | 3.173392067 | 3.186031867 | 3.219866133 |
| "Sac3d1"  | 3.56306355  | 3.4907689   | 3.49761345  | 3.5097905   | 3.6014289   | 3.67082135  | 3.56328475  | 3.44454755  |
| "Sacm11"  | 11.053485   | 10.766546   | 10.915364   | 10.897424   | 10.81405    | 10.705798   | 11.047705   | 10.946915   |
| "Sacs"    | 3.1427572   | 3.1721694   | 3.4580545   | 3.549636    | 3.2131095   | 3.1865861   | 3.3105667   | 3.407474    |
| "Sae1"    | 4.032601867 | 4.309045767 | 4.6238622   | 4.349679867 | 4.458714667 | 4.125676533 | 4.3110462   | 4.290017133 |
| "Safb"    | 7.6714588   | 7.8419645   | 7.587462    | 7.09443175  | 8.388714    | 7.94208715  | 7.5203935   | 7.58207135  |
| "Safb2"   | 6.322738    | 6.066159    | 6.065116    | 6.151852667 | 6.552468233 | 6.197122567 | 6.067575533 | 6.2873592   |
| "Sag"     | 2.328233    | 2.360459    | 2.2159877   | 2.2571561   | 2.319991    | 2.305127    | 2.3134818   | 2.4401135   |
| "Sall1"   | 3.0531921   | 3.0220327   | 2.9816344   | 2.974131    | 3.0394394   | 3.2519507   | 3.0030024   | 3.0246682   |
| "Sall2"   | 3.197796    | 3.1985195   | 3.1684332   | 3.0972683   | 3.3850846   | 3.1893985   | 3.1546726   | 3.192787    |
| "Sall4"   | 2.605197    | 2.571138    | 2.5045848   | 2.5470428   | 2.5943007   | 2.5958862   | 2.5787332   | 2.5812325   |
| "Samd10"  | 2.4464293   | 2.4278634   | 2.3384645   | 2.3745532   | 2.47501     | 2.4441059   | 2.450954    | 2.4386246   |
| "Samd4"   | 5.5200973   | 5.2207303   | 5.469152    | 5.506559    | 4.087418    | 4.40554     | 4.420558    | 4.5892186   |
| "Samd4b"  | 3.6494687   | 3.5986822   | 3.6252036   | 3.705056    | 3.6352806   | 3.6130762   | 3.5291603   | 3.619549    |
| "Samd8"   | 9.500152    | 9.150334    | 8.996456    | 9.766494    | 9.1071615   | 9.756276    | 9.434045    | 9.742052    |
| "Samhd1"  | 4.9584794   | 4.32438     | 5.328516925 | 4.8951307   | 4.49868605  | 4.416168525 | 4.835676475 | 4.56410815  |
| "Samm50"  | 10.7157235  | 11.077523   | 10.926404   | 10.487975   | 11.0958095  | 11.3014925  | 10.6934945  | 10.7783505  |
| "Samsn1"  | 2.567315    | 2.5522726   | 3.8454297   | 3.1444414   | 2.5936902   | 2.7266505   | 2.6924489   | 2.5626218   |
| "Samt3"   | 2.5390263   | 2.5111287   | 2.4642916   | 2.4934568   | 2.5371752   | 2.5344818   | 2.5196683   | 2.530143    |
| "Sap30"   | 7.7028313   | 5.978243    | 6.5331593   | 6.416371    | 6.679287    | 7.0363846   | 6.8779345   | 6.7194266   |
| "Sap30l"  | 8.660154    | 9.170809    | 8.897427    | 8.976441    | 8.898897    | 8.758987    | 8.862706    | 9.036556    |
| "Sar1a"   | 8.3966256   | 8.60870235  | 8.814266    | 8.3581845   | 8.55522865  | 8.19673185  | 8.2346182   | 8.312639    |
| "Sar1b"   | 11.961099   | 12.4397545  | 12.12838    | 12.423018   | 12.62655    | 12.646635   | 12.488824   | 12.535094   |
| "Sardh"   | 8.2844075   | 9.6493585   | 10.0825275  | 10.779502   | 10.6169775  | 9.6171295   | 10.9050665  | 10.137468   |
| "Sarnp"   | 9.052871767 | 9.0088933   | 9.003374667 | 8.9011585   | 8.9615592   | 9.118759    | 9.253744333 | 9.104812167 |
| "Sars"    | 7.76149865  | 7.8785405   | 7.39393315  | 7.366029    | 7.7087375   | 8.47356775  | 7.42897225  | 7.8572455   |
| "Sars2"   | 3.9842768   | 4.072629    | 3.8562403   | 4.05528     | 4.3240056   | 4.215819    | 4.0964975   | 4.076603    |
| "Sart1"   | 6.999765    | 6.9823623   | 6.7359686   | 6.7575574   | 6.9710393   | 6.8908634   | 6.7845297   | 6.7082443   |
| "Sart3"   | 4.5929152   | 4.2922683   | 4.2225578   | 4.45322415  | 4.3363552   | 4.30154345  | 4.31552275  | 4.3027794   |
| "Sash1"   | 10.7404585  | 9.743041    | 10.161947   | 10.212083   | 9.723733    | 9.833902    | 9.99765     | 10.052725   |
| "Sash3"   | 4.776535    | 3.8922937   | 6.8721786   | 5.149704    | 5.514332    | 4.3705454   | 5.3349624   | 4.2589927   |
| "Sass6"   | 3.280126    | 2.611522    | 4.233321    | 3.2227938   | 3.5092344   | 3.2504597   | 3.268139    | 3.2503414   |
| "Sat1"    | 11.873011   | 10.865097   | 11.984678   | 11.497948   | 11.024503   | 11.407609   | 11.4011965  | 11.446681   |
| "Satb1"   | 2.755239433 | 2.747296433 | 3.027955367 | 2.839161933 | 2.7464344   | 2.836285033 | 3.0598799   | 2.737727767 |
| "Sav1"    | 6.0513608   | 5.581441    | 4.97516835  | 4.9365818   | 5.12408815  | 5.1201142   | 4.94095195  | 5.3953995   |
| "Sbds"    | 8.917035    | 9.402583    | 8.417446    | 8.874296    | 9.020876    | 8.650099    | 8.4183      | 8.751575    |
| "Sbf2"    | 6.3677983   | 6.44191235  | 6.40835     | 6.67828225  | 6.5270438   | 6.46912485  | 6.6569345   | 6.672184    |
| "Sbk1"    | 7.68381735  | 8.1576718   | 7.24450715  | 8.0559126   | 7.9797712   | 8.005761    | 7.298409    | 6.5598775   |
| "Sbno1"   | 7.12077225  | 7.348081275 | 7.0141621   | 7.200655325 | 7.353163675 | 7.418950725 | 7.1581134   | 7.533628125 |
| "Sbp"     | 2.7241013   | 2.7097213   | 2.6867332   | 2.671877    | 2.739688    | 2.726832    | 2.6813812   | 2.7739947   |
| "Sc4mol"  | 12.738284   | 11.620461   | 13.277508   | 12.4519005  | 9.396731    | 7.6620636   | 10.878824   | 12.126097   |
| "Sc5d"    | 6.4531223   | 6.6567565   | 7.4199347   | 7.139882    | 6.6488081   | 6.32842465  | 7.14851825  | 7.3263358   |
| "Scaf11"  | 7.17364805  | 7.51997085  | 7.12927775  | 7.3413376   | 7.102838475 | 7.41072015  | 7.15202475  | 7.2791185   |
| "Scaf4"   | 6.4282673   | 6.58187915  | 6.2245555   | 6.308991    | 6.687403    | 6.8755532   | 6.5551772   | 6.7454865   |
| "Scaf8"   | 6.6367033   | 6.6392452   | 6.1239995   | 6.44367815  | 6.9839007   | 6.52339     | 6.56201315  | 6.6225691   |
| "Scamp1"  | 10.00594    | 9.721635    | 9.553154    | 9.511986    | 9.301528    | 9.250246    | 8.90172     | 10.110945   |
| "Scamp2"  | 6.15760275  | 6.0494014   | 6.671464    | 6.1059523   | 6.0374571   | 5.95474985  | 6.0339475   | 6.20587665  |
| "Scamp3"  | 6.849813    | 7.1906366   | 7.19553     | 7.318906    | 7.626095    | 7.6354957   | 7.263157    | 7.22007     |
| "Scamp4"  | 4.790847    | 4.8132353   | 5.0886974   | 4.7333026   | 4.6180263   | 4.694296    | 4.7112164   | 4.6879435   |
| "Scamp5"  | 2.4687316   | 2.48722     | 2.6428494   | 2.4799204   | 2.5210228   | 2.493533    | 2.738972    | 2.4809294   |
| "Scand1"  | 7.0614905   | 7.19763     | 6.969704    | 7.234779    | 7.011963    | 6.938337    | 7.041304    | 7.028274    |
| "Scap"    | 9.989465    | 9.991306    | 9.73902     | 10.252339   | 9.8227415   | 9.999973    | 10.221995   | 10.4039545  |
| "Scara3"  | 2.9133441   | 2.6142194   | 2.8143137   | 3.4159772   | 3.2637784   | 2.8454177   | 3.12633     | 3.0177438   |
| "Scara5"  | 5.7550385   | 6.1401033   | 3.2167272   | 4.17802625  | 3.3044954   | 5.9986565   | 2.19114745  | 4.02075385  |
| "Scarb1"  | 10.37314667 | 10.185182   | 10.31332867 | 10.092077   | 10.06938767 | 10.01944733 | 10.63733267 | 10.16848733 |
| "Scarb2"  | 10.60809875 | 11.0419065  | 10.3010455  | 10.6122025  | 10.9585835  | 11.195145   | 10.4846945  | 10.8598045  |
| "Sccpdh"  | 2.9910896   | 3.1014466   | 3.06114925  | 2.8164642   | 2.8978926   | 3.12331535  | 2.85207805  | 2.8939762   |
| "Scd1"    | 9.5540995   | 9.3156116   | 10.9236315  | 10.15163815 | 9.89296385  | 9.15522865  | 11.3513435  | 10.72972175 |
| "Scd2"    | 8.1578      | 5.587589    | 8.779118    | 6.62511     | 6.3735857   | 5.716747    | 6.80897     | 6.504953    |
| "Scel"    | 2.6078165   | 2.6169622   | 2.5468926   | 2.5923915   | 2.6426399   | 2.643092    | 2.551136    | 2.646998    |
| "Scfd1"   | 5.6719363   | 5.79147     | 5.8741491   | 5.79595465  | 5.9215648   | 5.6312105   | 5.8539515   | 5.855233    |
| "Scg2"    | 2.6465535   | 2.6188273   | 2.5403755   | 2.5797653   | 2.6424773   | 2.639931    | 2.6127324   | 2.6383576   |
| "Scg3"    | 2.3371994   | 2.30599     | 2.2411835   | 2.2876701   | 2.4302945   | 2.3211386   | 2.3264778   | 2.3132164   |
| "Scg5"    | 2.7510276   | 2.7267342   | 2.6113954   | 2.6731067   | 2.7642741   | 2.7811217   | 2.7207506   | 2.7565098   |
| "Scgb1a1" | 3.0512183   | 3.0196733   | 2.968747    | 2.9804091   | 3.1039302   | 3.3175092   | 5.412449    | 3.0217657   |
| "Sclt1"   | 2.7684355   | 2.7324305   | 2.7042947   | 2.6881528   | 2.7540982   | 2.7490435   | 2.7529697   | 2.7420359   |
| "Scly"    | 6.4950624   | 6.7700152   | 7.6149344   | 7.652744    | 7.4827266   | 6.835169    | 7.766031    | 7.2647524   |
| "Scmh1"   | 2.7893612   | 3.4986463   | 2.9919472   | 2.8918815   | 2.7245917   | 3.0010831   | 2.9203768   | 2.8036933   |
| "Scml4"   | 2.5304859   | 2.4952936   | 2.3623579   | 2.4719653   | 2.517086    | 2.512991    | 2.5219083   | 2.5533662   |

|             |             |             |             |             |             |             |             |             |
|-------------|-------------|-------------|-------------|-------------|-------------|-------------|-------------|-------------|
| "Scn10a"    | 2.5183382   | 2.490654    | 2.4126863   | 2.4627283   | 2.5939646   | 2.5226455   | 2.505791    | 2.5056784   |
| "Scn1a"     | 2.8549654   | 2.8404772   | 2.7065344   | 2.7592683   | 2.8849947   | 2.8899379   | 2.8238852   | 2.8899596   |
| "Scn1b"     | 2.4072661   | 2.5579689   | 2.4431043   | 2.3783407   | 2.4016075   | 2.397201    | 2.3865595   | 2.3855984   |
| "Scn2a1"    | 2.5681144   | 2.5384902   | 2.4632192   | 2.502144    | 2.56339625  | 2.5589592   | 2.54574535  | 2.5541247   |
| "Scn3a"     | 2.5635462   | 2.536471    | 2.5137055   | 2.4917283   | 2.5654588   | 2.5542164   | 2.5522194   | 2.5812101   |
| "Scn4a"     | 3.2417274   | 3.3177094   | 3.1541753   | 3.160412    | 3.352529    | 3.3130763   | 3.1821003   | 3.2453837   |
| "Scn8a"     | 2.3945909   | 2.356665    | 2.2847004   | 2.3379319   | 2.3784757   | 2.3716228   | 2.3835454   | 2.366423    |
| "Scnm1"     | 5.3596196   | 5.5350623   | 5.8571215   | 5.369478    | 5.061143    | 5.3884597   | 5.745831    | 5.5942345   |
| "Scnn1a"    | 4.4630866   | 4.569959    | 4.4609556   | 4.4180627   | 4.5177407   | 4.445771    | 4.61015     | 5.1149836   |
| "Scnn1b"    | 2.4097948   | 2.3805952   | 2.3316286   | 2.3549485   | 2.4053607   | 2.3889923   | 2.398726    | 2.4214692   |
| "Sco2"      | 9.327077    | 9.302001    | 8.414261    | 8.573977    | 9.136394    | 9.680865    | 9.559471    | 8.968797    |
| "ScoC"      | 7.016134    | 6.93811915  | 6.62488565  | 6.58388855  | 6.5130717   | 6.81298945  | 7.32534575  | 6.57629515  |
| "Scp2"      | 11.42599533 | 11.67116047 | 11.11384553 | 11.42634267 | 11.680714   | 11.7251579  | 11.9477419  | 11.74529433 |
| "Scpep1"    | 8.7853115   | 7.99965075  | 8.5125285   | 8.6253325   | 7.33414     | 8.0500425   | 8.4156118   | 8.2566025   |
| "Scrg1"     | 2.5930264   | 2.5591154   | 2.4046643   | 2.4977355   | 2.7388465   | 2.64921     | 2.5293045   | 2.5636096   |
| "Scrib"     | 5.834059    | 5.051046    | 4.6137786   | 4.651395    | 5.046128    | 6.021852    | 5.067796    | 5.0505652   |
| "Scrn2"     | 4.854801    | 5.63665725  | 5.0022627   | 5.51069385  | 5.8865025   | 5.54156725  | 5.8275593   | 5.78110815  |
| "Scrn3"     | 8.0418072   | 8.249364333 | 7.906613833 | 8.319123333 | 8.255347167 | 8.3085148   | 8.414852867 | 8.267296167 |
| "Scube2"    | 2.4197612   | 2.3918955   | 2.320845    | 2.3715975   | 2.4163227   | 2.4109683   | 2.4101791   | 2.4039202   |
| "Scx"       | 2.8149047   | 2.8357534   | 2.6700191   | 2.7233238   | 2.8038497   | 2.8356633   | 2.783755    | 2.8353457   |
| "Scyl1"     | 7.030989667 | 7.2518859   | 7.0212342   | 7.113691    | 7.292671333 | 7.421704767 | 7.065431533 | 7.192068967 |
| "Sdad1"     | 7.6176405   | 7.1614056   | 7.100027    | 6.810784    | 7.201162    | 7.1733804   | 7.0577903   | 7.19306     |
| "Sdc1"      | 9.520999075 | 8.8883261   | 9.19751675  | 8.721997875 | 9.0849814   | 9.1320615   | 9.27296965  | 8.55623165  |
| "Sdc2"      | 9.889554333 | 9.694855    | 9.894255    | 10.14470467 | 10.06976133 | 10.03400767 | 9.9938405   | 9.994280833 |
| "Sdc3"      | 4.7131996   | 4.223588133 | 4.964877833 | 4.749576033 | 4.3584108   | 4.115751867 | 4.812847833 | 4.58489867  |
| "Sdc4"      | 12.446292   | 12.013992   | 11.723821   | 11.8989105  | 11.620397   | 12.215036   | 11.4461815  | 11.2990845  |
| "Sdcbp"     | 9.751343    | 8.83728065  | 9.9299945   | 9.624995    | 9.025062    | 8.8753987   | 9.376351    | 8.98151775  |
| "Sdcbp2"    | 2.4437537   | 2.407439    | 2.3578286   | 2.3944411   | 2.4451814   | 2.4260435   | 2.326475    | 2.4250627   |
| "Sdccag3"   | 4.726063025 | 4.872222525 | 4.6092479   | 4.664757125 | 4.689592525 | 4.722720425 | 4.74922405  | 4.768383525 |
| "Sdccag8"   | 3.4787556   | 3.12149845  | 3.0043839   | 3.09005585  | 3.1829956   | 3.1974267   | 3.0908753   | 3.340256    |
| "Sdf2"      | 9.861911    | 9.68424     | 9.86478     | 9.883032    | 9.552242    | 10.020462   | 9.487714    | 9.721381    |
| "Sdf211"    | 6.8797417   | 5.876665    | 7.38702     | 7.0659776   | 8.307658    | 8.299373    | 7.4139466   | 7.8106813   |
| "Sdf4"      | 7.2671045   | 7.40361535  | 7.15927675  | 7.3130292   | 7.48590915  | 7.2139185   | 7.25818735  | 7.382806    |
| "Sdha"      | 10.794262   | 11.370988   | 11.217347   | 11.5719525  | 11.47902645 | 11.134557   | 11.643421   | 11.662471   |
| "Sdhaf1"    | 6.4297647   | 7.4259653   | 6.3817472   | 6.473591    | 6.675364    | 6.911321    | 6.5532618   | 6.701105    |
| "Sdhaf2"    | 7.47020125  | 7.33799265  | 7.75318275  | 7.58081865  | 7.46297625  | 7.5759962   | 7.4249757   | 7.60275415  |
| "Sdhb"      | 11.721201   | 12.533695   | 12.258117   | 12.656424   | 12.536405   | 12.246529   | 12.445445   | 12.716917   |
| "Sdhc"      | 8.26033025  | 8.903888    | 8.796806    | 8.9942275   | 8.984234    | 8.7433185   | 9.0176977   | 9.0369107   |
| "Sdhd"      | 9.763494    | 9.795847    | 9.8625845   | 9.7234235   | 9.983043    | 9.8396085   | 10.1612985  | 9.91186875  |
| "Sdpr"      | 8.31137715  | 7.457774    | 8.86149325  | 7.86774975  | 8.1085329   | 7.7411165   | 8.9116725   | 7.002324    |
| "Sdr42e1"   | 8.013033    | 9.38611     | 8.774878    | 9.823404    | 9.996989    | 9.066307    | 9.876658    | 9.756198    |
| "Sds"       | 12.383897   | 12.686111   | 12.154105   | 11.923818   | 12.094281   | 12.644542   | 11.604819   | 10.916204   |
| "Sds1"      | 8.199534    | 8.262262    | 6.2394543   | 6.098304    | 6.4437485   | 8.491358    | 6.165615    | 6.4108534   |
| "Sec11a"    | 10.134175   | 10.883438   | 10.2719345  | 10.208593   | 10.248159   | 10.507298   | 10.0470085  | 10.31088    |
| "Sec11c"    | 9.439663    | 9.894854    | 10.0518875  | 10.196462   | 10.060568   | 9.803871    | 10.243862   | 10.200037   |
| "Sec13"     | 9.427703    | 10.299794   | 9.796528    | 9.445247    | 9.835786    | 9.588293    | 9.368651    | 9.461182    |
| "Sec141"    | 3.9951289   | 4.1475697   | 4.6233864   | 4.3499727   | 4.2609878   | 4.273568    | 4.239222    | 4.2454715   |
| "Sec1412"   | 9.131515    | 10.152104   | 10.264092   | 10.5858345  | 11.13865    | 10.629208   | 11.230046   | 10.82869    |
| "Sec141a"   | 9.901773    | 10.642877   | 8.874893    | 9.116125    | 9.379694    | 9.380007    | 9.090864    | 8.645767    |
| "Sec16a"    | 8.6321545   | 8.985664    | 8.5301505   | 8.620634    | 8.9941985   | 8.697938    | 8.3217365   | 8.6668835   |
| "Sec16b"    | 7.5561543   | 8.446365    | 8.075864    | 8.069617    | 8.514082    | 8.387715    | 8.731228    | 8.034263    |
| "Sec22a"    | 6.301426    | 7.134604    | 7.043171    | 7.0422025   | 6.811147    | 6.5956926   | 6.784       | 7.003725    |
| "Sec22b"    | 9.111665    | 9.435141    | 8.9699765   | 8.8549195   | 9.2881775   | 8.7519505   | 8.535243    | 8.6383475   |
| "Sec23a"    | 10.639526   | 11.169437   | 10.380722   | 10.57722    | 10.995431   | 11.115056   | 10.97303    | 10.629256   |
| "Sec23b"    | 8.227046    | 8.915695    | 9.204971    | 8.691505    | 9.424763    | 8.367672    | 8.607315    | 8.799225    |
| "Sec23ip"   | 8.126633    | 8.368081    | 8.161209    | 8.211021    | 8.4330845   | 8.388793    | 8.190965    | 8.3019905   |
| "Sec24b"    | 6.246688    | 5.9246783   | 5.5916924   | 5.612506    | 5.598177    | 6.221073    | 5.8727865   | 5.6504984   |
| "Sec24c"    | 8.810796    | 9.606123    | 9.643424    | 9.514551    | 9.761602    | 9.429275    | 9.500401    | 9.553326    |
| "Sec24d"    | 9.223144    | 9.841368    | 9.268714    | 8.918627    | 9.985783    | 9.560969    | 8.937019    | 8.727702    |
| "Sec31a"    | 7.872491    | 8.236303    | 8.279323    | 7.9838777   | 8.527261    | 8.099556    | 7.8919635   | 7.9683332   |
| "Sec61a1"   | 7.511174217 | 7.86736835  | 7.863603733 | 7.5601809   | 8.3562144   | 7.609977517 | 7.4875127   | 7.89788085  |
| "Sec61a2"   | 3.06639255  | 2.88869535  | 3.39633095  | 3.21629965  | 3.8019515   | 4.04533445  | 3.48945225  | 3.6435809   |
| "Sec61b"    | 6.5618006   | 6.9670836   | 7.3295495   | 6.96127535  | 6.95429705  | 6.60906265  | 7.0256955   | 7.0617868   |
| "Sec62"     | 9.898128233 | 9.6921731   | 9.721404    | 9.899305767 | 9.755828667 | 9.707207333 | 9.8408215   | 9.910563    |
| "Sec63"     | 7.97899765  | 8.3847905   | 8.133145425 | 8.40192375  | 8.741445875 | 8.642192875 | 8.7426731   | 8.710175925 |
| "Secisbp2l" | 7.9078415   | 8.1727038   | 8.32989625  | 8.252411    | 8.2269135   | 8.2619845   | 8.4303225   | 8.2626424   |
| "Sectm1a"   | 2.438619    | 2.3907073   | 3.1097066   | 3.540618    | 2.3701665   | 2.3433447   | 2.80238     | 2.3144903   |
| "Sehl1"     | 6.21417012  | 6.26292742  | 5.6838488   | 5.675249    | 5.8383642   | 6.0404408   | 6.12624664  | 6.08328858  |
| "Sel1l"     | 4.169090075 | 4.76431895  | 4.535471    | 4.86173055  | 5.53968835  | 4.732331125 | 4.69820525  | 4.83367195  |
| "Sel1i3"    | 5.616874    | 5.556528    | 5.5639186   | 5.9672174   | 5.9964957   | 5.6178374   | 5.6414742   | 7.251506    |
| "Selenbp1"  | 12.198228   | 13.4358805  | 12.581972   | 13.002532   | 12.000654   | 11.911945   | 12.2562675  | 12.2458575  |
| "Selk"      | 10.955478   | 10.381587   | 10.417867   | 10.114193   | 10.501734   | 10.269006   | 10.285625   | 10.3728075  |
| "Sell"      | 5.40882215  | 2.82461555  | 4.88177975  | 3.01181265  | 2.8951195   | 2.87413825  | 3.15002735  | 2.88285165  |
| "Selm"      | 2.4830813   | 2.579063    | 2.4210784   | 2.3694322   | 2.6906412   | 2.5012627   | 2.5615346   | 2.4366257   |
| "Selp"      | 2.64402155  | 2.63700355  | 2.60996875  | 2.63218685  | 2.66581525  | 2.78189255  | 2.7205254   | 2.67344215  |
| "Selplg"    | 5.7889657   | 4.47515     | 6.657673    | 5.3674293   | 5.107468    | 4.788745    | 5.676041    | 4.75285     |
| "Sema3a"    | 2.499765067 | 2.4733895   | 2.418604833 | 2.442563533 | 2.523298833 | 2.498287133 | 2.483448133 | 2.489781633 |
| "Sema3b"    | 2.8661509   | 2.840623    | 2.7662003   | 2.787123    | 2.8739645   | 2.8601055   | 2.8393798   | 2.879813    |
| "Sema3e"    | 2.623202033 | 2.5911654   | 2.519686767 | 2.549370867 | 2.633100967 | 2.6126593   | 2.5981257   | 2.611851433 |
| "Sema4a"    | 7.71849865  | 6.9054882   | 7.58434     | 8.5976195   | 7.9411609   | 8.0198105   | 8.461165    | 8.3124593   |
| "Sema4b"    | 6.992232    | 5.8356333   | 6.3982725   | 5.8788285   | 5.7802052   | 5.987725    | 6.1811266   | 6.1282883   |

|             |             |             |             |             |             |             |             |             |
|-------------|-------------|-------------|-------------|-------------|-------------|-------------|-------------|-------------|
| "Sema4d"    | 2.2204244   | 2.168491    | 2.7457504   | 2.6211073   | 2.1964777   | 2.1955338   | 2.2116678   | 2.1726422   |
| "Sema4g"    | 7.276791    | 8.111685    | 8.658137    | 9.058828    | 8.177022    | 8.094309    | 8.910058    | 9.253768    |
| "Sema5a"    | 2.58880855  | 2.56309185  | 2.49324235  | 2.52839245  | 2.5923247   | 2.5902232   | 2.5775282   | 2.5769851   |
| "Sema5b"    | 2.6062303   | 2.83869     | 2.5045443   | 2.5389676   | 2.6060557   | 2.596526    | 2.5984821   | 2.6015449   |
| "Sema6b"    | 2.558521    | 2.5728598   | 2.5136595   | 2.5170968   | 2.5395443   | 2.5485709   | 2.538547    | 2.5673609   |
| "Sema6d"    | 2.589258    | 2.5499837   | 2.5302756   | 2.4923215   | 2.5777261   | 2.5708685   | 2.557829    | 2.5653353   |
| "Sema7a"    | 2.406069    | 2.374219    | 2.3023868   | 2.3579757   | 2.3940163   | 2.3855765   | 2.3951344   | 2.3873508   |
| "Senp1"     | 3.7145971   | 3.7399204   | 3.62909505  | 3.62954735  | 3.78060915  | 3.74908615  | 3.72098685  | 3.76259615  |
| "Senp2"     | 5.470174    | 5.3230963   | 5.1643071   | 5.0708998   | 4.973149467 | 5.261296567 | 5.030424167 | 5.104550667 |
| "Senp3"     | 7.899156    | 7.7360377   | 7.6208572   | 7.6909504   | 7.8823857   | 8.118412    | 7.4197993   | 7.8731413   |
| "Senp6"     | 8.623487    | 8.476457    | 8.0638075   | 8.281421    | 8.31509     | 8.903397    | 8.300564    | 8.433523    |
| "Seph1"     | 4.1823645   | 4.749707    | 3.7514253   | 3.7880478   | 4.3784266   | 4.613816    | 4.106859    | 4.1323195   |
| "Seph2"     | 11.96980417 | 11.98949867 | 11.911125   | 12.13282233 | 12.0300805  | 12.04064583 | 12.00159867 | 12.11610283 |
| "Sepn1"     | 3.4311345   | 2.6722968   | 2.652644    | 2.6633406   | 2.6936266   | 2.6863499   | 2.6983898   | 2.6801105   |
| "Sepp1"     | 14.751884   | 14.935283   | 14.738044   | 14.892454   | 15.086797   | 15.008579   | 14.997932   | 14.913045   |
| "Sepsecs"   | 3.417147    | 3.4202046   | 3.844268    | 4.143291    | 3.8206048   | 3.2532964   | 4.2803297   | 3.8044941   |
| "SEPT1"     | 2.4654973   | 2.432143    | 2.395152    | 2.414925    | 2.4572983   | 2.4430969   | 2.4628565   | 2.3455698   |
| "SEPT10"    | 8.197966    | 7.8152313   | 8.847827    | 8.611826    | 8.112102    | 8.084674    | 8.769583    | 8.676377    |
| "SEPT11"    | 3.7014506   | 3.669227    | 3.6316466   | 3.6494956   | 3.680537    | 3.6795187   | 3.6810567   | 3.6852455   |
| "SEPT15"    | 11.456938   | 11.613122   | 11.735205   | 11.9544325  | 11.604291   | 11.322721   | 11.673653   | 11.668378   |
| "SEPT2"     | 5.8213923   | 5.6845641   | 5.89788005  | 5.7984694   | 5.75713515  | 5.7624495   | 5.7593415   | 5.821174    |
| "SEPT3"     | 2.3548424   | 2.3313046   | 2.3226438   | 2.291647    | 2.3516083   | 2.3543508   | 2.348196    | 2.3423529   |
| "SEPT4"     | 6.2002265   | 5.03427525  | 6.5973685   | 6.14439155  | 6.1087058   | 5.8924551   | 6.64911005  | 6.50567535  |
| "SEPT6"     | 2.681464617 | 2.661594783 | 2.645022883 | 2.626946267 | 2.698378433 | 2.676923633 | 2.660899983 | 2.729586467 |
| "SEPT7"     | 9.1812575   | 8.80389835  | 9.116313    | 8.77084315  | 8.806693    | 8.930878    | 9.468505    | 8.8809905   |
| "SEPT8"     | 4.390622    | 3.93628     | 5.221697    | 4.5636234   | 4.2870846   | 4.264781    | 4.2821274   | 4.264104    |
| "SEPT9"     | 7.6800323   | 8.6526575   | 8.76174     | 8.821449    | 9.055172    | 8.341043    | 9.207132    | 8.743525    |
| "Sepw1"     | 6.56455465  | 6.74839535  | 6.84388765  | 7.46393885  | 6.66435525  | 6.872287    | 6.6425879   | 6.78184435  |
| "Sepx1"     | 10.139202   | 10.676259   | 10.702981   | 11.252595   | 10.650508   | 10.440654   | 10.874255   | 11.14206    |
| "Serac1"    | 3.4548209   | 3.050248    | 2.8950298   | 3.4723597   | 3.3088558   | 3.4558744   | 3.4373825   | 3.3783154   |
| "Serbp1"    | 8.38551298  | 8.34065026  | 8.2742242   | 8.12197206  | 8.13783968  | 8.18238452  | 8.29899242  | 8.01773008  |
| "Serf1"     | 4.2335966   | 3.960259733 | 4.1792746   | 4.226460967 | 4.2131132   | 4.283313667 | 4.628157033 | 4.3353324   |
| "Serf2"     | 10.23854208 | 10.5010672  | 10.9040062  | 10.8454118  | 10.5787778  | 10.3163334  | 10.6434198  | 10.6451003  |
| "Sergef"    | 4.7053576   | 4.3062363   | 4.9711456   | 4.274959    | 4.338482    | 4.6919875   | 4.228736    | 4.332198    |
| "Serhl"     | 6.452999    | 7.24721505  | 7.400625    | 7.66994145  | 7.473723    | 7.0510168   | 7.3580502   | 7.5143535   |
| "Serinc1"   | 10.256032   | 9.9238008   | 9.46813625  | 9.4804395   | 9.62460085  | 9.939149375 | 9.6654789   | 9.637170875 |
| "Serinc3"   | 9.70436928  | 9.29657906  | 8.57354352  | 8.43083174  | 9.16688302  | 9.38053204  | 8.66438518  | 8.37532712  |
| "Serinc4"   | 2.5447066   | 2.6902847   | 2.4883127   | 2.5194438   | 2.5736172   | 2.5810287   | 2.5947592   | 2.518069    |
| "Serp1"     | 10.5770595  | 10.813776   | 10.7689245  | 10.44988    | 10.8423335  | 10.445224   | 10.22437075 | 10.64251725 |
| "Serpina10" | 13.618099   | 12.602344   | 13.308693   | 12.830633   | 12.401009   | 12.448197   | 11.905043   | 12.426403   |
| "Serpina12" | 6.7008897   | 8.1978995   | 6.34435015  | 7.2376589   | 6.5226813   | 6.2849247   | 5.7722914   | 7.09657125  |
| "Serpina1a" | 15.326265   | 15.094881   | 14.963099   | 15.224001   | 15.089018   | 15.1772175  | 15.547365   | 15.317573   |
| "Serpina1b" | 14.761709   | 14.9570065  | 14.705965   | 14.8760945  | 14.978773   | 14.95607275 | 14.8514215  | 14.971798   |
| "Serpina1c" | 14.478064   | 14.785732   | 14.555041   | 14.7048     | 14.732742   | 14.794458   | 14.540251   | 14.779669   |
| "Serpina3c" | 2.762167    | 4.7056065   | 2.3394642   | 2.3742883   | 2.4417887   | 2.448667    | 2.4277503   | 2.4310265   |
| "Serpina3g" | 7.3638573   | 5.6537786   | 8.448946    | 7.8573203   | 6.8232946   | 6.096622    | 7.6537476   | 7.3836775   |
| "Serpina3k" | 11.023618   | 11.52136025 | 9.4965655   | 9.8458095   | 10.8041645  | 11.31120475 | 9.7266465   | 10.36301475 |
| "Serpina3m" | 13.283005   | 12.838546   | 12.833014   | 12.038921   | 13.128698   | 12.555435   | 12.43849    | 11.87717    |
| "Serpina3n" | 12.341912   | 10.928943   | 10.788851   | 10.5259905  | 11.487879   | 10.812698   | 9.754749    | 10.126209   |
| "Serpina5"  | 2.7042315   | 3.9979503   | 2.6924293   | 2.5974553   | 2.7117803   | 2.709882    | 2.6788862   | 2.686957    |
| "Serpina6"  | 7.9351163   | 7.172356    | 9.850583    | 11.242569   | 8.632901    | 7.891516    | 11.027714   | 11.186842   |
| "Serpina1a" | 3.6613913   | 3.9718179   | 4.6380852   | 5.1415298   | 4.66981005  | 4.1319243   | 6.20530585  | 4.74476135  |
| "Serpina1b" | 2.4616532   | 2.4256      | 2.3602552   | 2.3971682   | 2.4699914   | 2.45013     | 2.440508    | 2.4453306   |
| "Serpina2"  | 2.6340146   | 2.6084254   | 2.5488987   | 2.578466    | 2.641302    | 2.625056    | 2.6081166   | 2.6374216   |
| "Serpina3b" | 2.622468    | 2.5925125   | 2.50131835  | 2.5766839   | 2.62905705  | 2.6105305   | 2.56257065  | 2.60762035  |
| "Serpina6a" | 9.5378475   | 8.517925    | 9.069533    | 8.798069    | 8.724098    | 8.764427    | 8.668089    | 8.396887    |
| "Serpina6b" | 4.722688    | 5.262458    | 5.0385118   | 5.079627    | 4.6326094   | 3.8446248   | 4.7824035   | 5.0423884   |
| "Serpina8"  | 2.8708258   | 2.8504367   | 2.7668748   | 2.8010883   | 2.8654535   | 2.8611493   | 3.1038945   | 2.8517385   |
| "Serpina9"  | 5.5910187   | 7.0299544   | 7.6190634   | 7.3395896   | 6.291113    | 6.414895    | 6.8884335   | 6.8268547   |
| "Serpina9c" | 2.63698385  | 2.6029422   | 2.54177725  | 2.5524508   | 2.6354382   | 2.63285815  | 2.61194915  | 2.6375606   |
| "Serpina9e" | 2.4787965   | 2.4503415   | 2.365275    | 2.4009078   | 2.4712706   | 2.4595327   | 2.463732    | 2.4607058   |
| "Serpina1c" | 13.960338   | 14.019443   | 14.137783   | 14.239073   | 14.406153   | 14.305466   | 14.340818   | 14.316822   |
| "Serpina1d" | 11.678186   | 11.78228    | 12.536817   | 12.644579   | 12.316726   | 12.153774   | 12.3677225  | 12.543926   |
| "Serpina1e" | 4.7765026   | 2.547484    | 2.8561993   | 2.6248343   | 2.5627947   | 2.5895495   | 2.5822873   | 2.559388    |
| "Serpina2"  | 4.703457    | 9.175438    | 3.72938     | 4.393023    | 4.5902815   | 5.8523955   | 4.1947694   | 4.982394    |
| "Serpina1f" | 10.6343765  | 11.2892345  | 10.840092   | 11.524862   | 11.4343115  | 11.416459   | 11.361218   | 11.62818825 |
| "Serpina2"  | 11.730389   | 11.675439   | 12.371693   | 12.30913    | 12.074743   | 11.969724   | 12.081617   | 12.263324   |
| "Serpina1g" | 13.046056   | 13.106887   | 13.496112   | 13.479023   | 13.200792   | 13.437812   | 12.912383   | 13.183086   |
| "Serpina1h" | 5.70848945  | 3.7939168   | 6.5518825   | 5.6742462   | 4.75435085  | 4.04391685  | 6.1273285   | 5.38268935  |
| "Serpina1i" | 2.7732176   | 2.7296141   | 2.6728946   | 2.7039552   | 2.7783292   | 2.7750738   | 2.75080275  | 2.7419077   |
| "Serpina1j" | 2.4308562   | 2.402382    | 2.3337302   | 2.3649716   | 2.4276583   | 2.4266815   | 2.4218192   | 2.4236116   |
| "Sertad1"   | 6.9381356   | 6.9118657   | 6.9457808   | 6.983007    | 6.9194756   | 7.108491    | 6.8495755   | 7.050134    |
| "Sertad2"   | 8.0175595   | 7.4511905   | 7.145958    | 7.584214    | 6.8170675   | 7.2496997   | 7.2077751   | 7.33026865  |
| "Sertad3"   | 3.14982995  | 3.30457405  | 3.07388885  | 3.28302535  | 3.31740165  | 3.50010265  | 3.69703995  | 3.6598861   |
| "Sesn1"     | 10.73256733 | 9.601406    | 8.193400333 | 7.995072133 | 7.9769735   | 8.418035    | 7.994839533 | 7.530624    |
| "Sesn2"     | 7.92125685  | 5.916142    | 5.170433    | 5.3532432   | 5.2629925   | 5.77877485  | 5.10752345  | 5.16430785  |
| "Sesn3"     | 7.4393387   | 7.9349523   | 8.065958    | 8.8108635   | 7.3439054   | 7.439726    | 8.642768    | 8.19586     |
| "Set"       | 9.597467    | 9.612388667 | 9.441890667 | 9.367660167 | 9.451192    | 9.92301667  | 9.600181833 | 9.618469    |
| "Setd1a"    | 3.55122355  | 3.15871645  | 2.9782323   | 3.16166115  | 3.1916115   | 3.25331625  | 3.1760888   | 3.18520415  |
| "Setd2"     | 9.02219     | 9.11154     | 8.73689     | 9.213177    | 9.119045    | 9.183581    | 9.018215    | 9.220394    |
| "Setd4"     | 5.275983333 | 5.6675744   | 5.733692    | 6.2498801   | 5.88111     | 6.7551658   | 6.103441133 | 6.1847435   |

|            |             |             |             |             |             |             |             |             |
|------------|-------------|-------------|-------------|-------------|-------------|-------------|-------------|-------------|
| "Setd6"    | 7.1571067   | 7.6413873   | 7.15786375  | 7.28102475  | 7.91217965  | 7.846337    | 7.5497363   | 7.56647325  |
| "Setd8"    | 7.693063    | 6.794862    | 7.3600748   | 7.0412555   | 6.5197682   | 6.8232799   | 6.93868915  | 7.258492    |
| "Setdb1"   | 4.60879345  | 4.4789895   | 4.70787665  | 4.63503575  | 4.83680415  | 4.775742    | 4.79858825  | 4.80038795  |
| "Sez6"     | 3.7580194   | 3.7322605   | 3.6969185   | 3.7096179   | 3.7482212   | 3.736603    | 3.7484705   | 3.7336261   |
| "Sf1"      | 6.702712    | 6.49886625  | 5.7926289   | 5.8817395   | 5.9351125   | 6.02909785  | 5.9464116   | 6.1009385   |
| "Sf3a1"    | 4.989868    | 4.7962768   | 5.049312    | 4.51693725  | 4.825131    | 4.7300694   | 4.580186    | 4.7384527   |
| "Sf3a2"    | 7.2626944   | 7.6430674   | 7.3306823   | 7.108464    | 7.662125    | 7.3826847   | 7.3400626   | 7.3704467   |
| "Sf3a3"    | 6.36608075  | 6.029313    | 6.5044485   | 5.844032    | 5.84751615  | 5.8973308   | 6.0392583   | 5.995034    |
| "Sf3b1"    | 10.020693   | 9.405068567 | 8.722310333 | 8.802421333 | 9.091011667 | 9.036442667 | 8.705033667 | 8.654501467 |
| "Sf3b2"    | 7.838628925 | 7.7820668   | 7.69178605  | 7.67485395  | 7.779263725 | 7.94751515  | 7.91377585  | 7.80305165  |
| "Sf3b3"    | 7.144709    | 6.999515    | 7.2656903   | 7.100602    | 7.210728    | 7.0370216   | 7.096897    | 7.1032667   |
| "Sf3b4"    | 4.8226845   | 4.93225585  | 4.71624245  | 4.71332825  | 4.8030244   | 4.86400665  | 4.7669146   | 4.8102226   |
| "Sf3b5"    | 6.292268    | 6.24208875  | 6.1326915   | 6.1382562   | 6.24485335  | 6.2388869   | 6.1323425   | 6.14698235  |
| "Sfmbt1"   | 3.8866415   | 4.0681963   | 4.01713895  | 4.2087171   | 3.92592905  | 4.10799315  | 4.1477438   | 4.28739265  |
| "Sfn"      | 2.4502118   | 2.4201453   | 2.363215    | 2.3918717   | 2.4427118   | 2.4338505   | 2.439168    | 2.428527    |
| "Sfpi1"    | 4.8855295   | 2.901545    | 4.70483     | 4.117732    | 3.1153948   | 2.9402738   | 3.8348064   | 3.1023521   |
| "Sfqp"     | 8.7151844   | 8.3207398   | 8.13754936  | 7.43676706  | 8.04638906  | 7.94669242  | 8.12365976  | 8.04673164  |
| "Sfr1"     | 10.538957   | 9.582711    | 9.586738    | 9.211401    | 9.460127    | 9.666686    | 9.5272255   | 9.592807    |
| "Sfrp1"    | 2.8698294   | 2.919813    | 2.8183042   | 2.897613533 | 2.9540118   | 2.909734267 | 2.815153633 | 2.963202    |
| "Sfrp4"    | 2.9868767   | 2.9139073   | 2.8977628   | 2.8352785   | 2.955431    | 3.1340747   | 2.897354    | 2.9555795   |
| "Sfrp5"    | 2.407733    | 2.37811     | 2.3047314   | 2.3099532   | 2.4029584   | 2.397697    | 2.3959222   | 2.391296    |
| "Sfswap"   | 5.572384567 | 4.745356    | 4.247735433 | 4.660402567 | 4.805938633 | 4.708957633 | 4.698434433 | 4.7388215   |
| "Sft2d1"   | 9.467384    | 9.516713    | 9.749238    | 9.556096    | 9.419745    | 9.394107    | 10.205308   | 9.723513    |
| "Sft2d2"   | 5.021932    | 5.2045135   | 5.4733435   | 5.16051485  | 4.4836334   | 4.4703137   | 5.4080355   | 5.1221785   |
| "Sftpa1"   | 2.5205882   | 2.4955642   | 2.4301898   | 2.484711    | 2.515984    | 2.509692    | 2.4992776   | 2.502716    |
| "Sftpc"    | 3.241033    | 3.2481222   | 3.126317    | 3.1540353   | 3.3316035   | 3.3358157   | 3.1665008   | 3.3462534   |
| "Sfxn1"    | 10.5488985  | 10.9903715  | 10.6893625  | 10.664264   | 10.823046   | 10.9014115  | 10.3595325  | 10.657144   |
| "Sfxn2"    | 8.27874     | 8.131914    | 8.3723005   | 8.2948352   | 8.5782985   | 8.742454    | 8.3706425   | 8.106007    |
| "Sfxn3"    | 3.9313183   | 3.728557    | 3.5721743   | 3.661955    | 3.7666357   | 3.7635205   | 3.7404685   | 3.7622442   |
| "Sfxn4"    | 2.622825    | 2.5875936   | 2.4628654   | 2.6179907   | 2.9470303   | 2.6154099   | 2.623616    | 2.6198723   |
| "Sgcb"     | 3.8662307   | 3.11596275  | 4.02354255  | 3.63448445  | 3.3484678   | 3.31662515  | 3.68682125  | 3.26620495  |
| "Sgcd"     | 2.5070767   | 2.4773836   | 2.3950725   | 2.4391541   | 2.5051465   | 2.5208151   | 2.4920726   | 2.4892416   |
| "Sgce"     | 6.3890033   | 6.256874    | 7.140534    | 6.362192    | 6.397303    | 6.6758018   | 6.783675    | 6.744672    |
| "Sgcg"     | 2.8697677   | 2.8462372   | 2.7214622   | 2.7768562   | 2.9394505   | 2.8942564   | 2.8388882   | 2.8971097   |
| "Sgip1"    | 2.41863775  | 2.38933555  | 2.32376455  | 2.37217745  | 2.42722105  | 2.4334624   | 2.4046972   | 2.4230776   |
| "Sgk1"     | 13.182602   | 10.251591   | 10.113218   | 9.924009    | 10.08458    | 9.920568    | 9.999814    | 9.482338    |
| "Sgk2"     | 6.8896794   | 10.088729   | 10.866102   | 9.663139    | 9.9327345   | 10.520181   | 11.046469   | 10.546983   |
| "Sgk3"     | 5.886228567 | 5.449962033 | 6.4236432   | 5.817702967 | 5.661440467 | 5.6141923   | 6.020398867 | 5.665778233 |
| "Sgms1"    | 5.5773128   | 4.88890145  | 4.7930545   | 4.70475055  | 5.1273551   | 5.13805935  | 5.44769975  | 4.9638655   |
| "Sgol1"    | 2.383447    | 2.345819    | 2.2493935   | 2.3348074   | 2.376369    | 2.374559    | 2.3589597   | 2.3706489   |
| "Sgpl1"    | 4.5850878   | 4.19715145  | 4.6826702   | 4.6091897   | 4.4165473   | 4.556164    | 4.6492766   | 4.79833615  |
| "Sgpp1"    | 7.684861667 | 7.571441567 | 7.404788433 | 7.447069467 | 7.5630019   | 7.493953167 | 8.113275133 | 7.725237    |
| "Sgsh"     | 2.9854405   | 2.95652465  | 3.0324534   | 3.08461635  | 2.9915459   | 2.9660288   | 2.9139616   | 2.87774455  |
| "Sgta"     | 6.87295     | 7.523901    | 7.268532    | 7.3031096   | 7.3054404   | 7.1770525   | 7.0566745   | 7.3483453   |
| "Sgtb"     | 3.7384186   | 3.7289202   | 3.639375    | 4.2496433   | 3.802576    | 3.7646916   | 3.733343    | 3.764121    |
| "Sh2b1"    | 7.407779    | 7.366965    | 7.0330186   | 7.228908    | 7.5106373   | 7.45872     | 7.149943    | 7.6111794   |
| "Sh2b2"    | 2.4686222   | 2.2856424   | 2.7641249   | 2.235382    | 2.3288267   | 2.3284118   | 2.272476    | 2.31838     |
| "Sh2d1a"   | 2.5746825   | 2.5516748   | 2.4834168   | 2.5132887   | 2.5694067   | 2.586899    | 2.560866    | 2.5833616   |
| "Sh2d1b1"  | 3.407442    | 3.3689716   | 3.3274434   | 3.3575149   | 3.3937201   | 3.403941    | 3.3964162   | 3.4095395   |
| "Sh2d3c"   | 2.8365843   | 2.7724538   | 3.4256563   | 2.7805068   | 2.7900083   | 2.8109      | 2.8074281   | 2.805732    |
| "Sh3bgr1"  | 10.45990433 | 9.961492333 | 10.28446533 | 10.56995433 | 10.326297   | 9.923762    | 10.856513   | 10.54473467 |
| "Sh3bgr12" | 7.571943    | 6.497381    | 7.019731    | 6.3637433   | 6.3488      | 6.457798    | 7.2784634   | 6.72533     |
| "Sh3bgr13" | 8.562824    | 6.9938498   | 8.379008    | 7.7819695   | 7.1431117   | 6.893637    | 7.4071264   | 7.126778    |
| "Sh3bp1"   | 5.699706    | 5.5079126   | 5.743661    | 5.673108    | 6.135724    | 5.701284    | 5.6979227   | 5.6811247   |
| "Sh3bp2"   | 5.540509    | 5.764448    | 6.277113    | 6.4480534   | 5.711726    | 5.127707    | 6.268748    | 6.196512    |
| "Sh3bp5"   | 8.17904215  | 8.36341835  | 8.25886765  | 8.47783765  | 8.3928814   | 8.1513355   | 8.199591    | 8.322798    |
| "Sh3bp51"  | 2.8931684   | 3.730118    | 3.9014888   | 3.8981967   | 4.4792194   | 3.7054877   | 4.5150304   | 3.9209175   |
| "Sh3d19"   | 5.339609475 | 5.786870075 | 5.574809625 | 6.118524075 | 5.513722425 | 5.98465665  | 6.085346525 | 6.4633659   |
| "Sh3gl1"   | 5.1289454   | 4.968956    | 4.661293    | 4.7788053   | 4.6474705   | 5.005177    | 4.857958    | 4.8381786   |
| "Sh3gl2"   | 2.4477358   | 2.4139814   | 2.377717    | 2.3966632   | 2.432723    | 2.4308357   | 2.4274397   | 2.425559    |
| "Sh3glb1"  | 8.639545    | 8.481821    | 8.3297524   | 8.665596333 | 8.232479467 | 8.241585233 | 8.262856133 | 8.066635467 |
| "Sh3glb2"  | 2.487763    | 3.114576    | 3.1734195   | 3.5011      | 3.2225225   | 2.7248468   | 3.721755    | 3.2383661   |
| "Sh3kbp1"  | 3.9508613   | 3.4627744   | 4.089141933 | 3.862309    | 3.842100167 | 3.838738033 | 3.670365367 | 3.4102466   |
| "Sh3rf1"   | 3.32011655  | 3.3271666   | 3.42644925  | 3.2028159   | 3.39105295  | 3.3844304   | 3.39663875  | 3.44378585  |
| "Sh3tc1"   | 2.5911152   | 2.4255614   | 2.4472246   | 2.4488528   | 2.7483454   | 2.5079284   | 2.5167017   | 2.5019932   |
| "Sh3yl1"   | 7.1462855   | 6.8094006   | 7.455101    | 7.253348    | 7.3234444   | 7.258489    | 7.8742003   | 7.8316755   |
| "Shank3"   | 2.5721493   | 2.438447    | 2.669456    | 2.4083319   | 2.554372    | 2.440547    | 2.4513993   | 2.4481344   |
| "Sharpin"  | 7.69693315  | 8.066554    | 8.003197    | 8.073306    | 8.169435    | 8.0853085   | 7.9380735   | 8.1902355   |
| "Shbg"     | 2.374069    | 2.341008    | 2.3050838   | 2.3245218   | 2.3609312   | 2.3518755   | 2.3635147   | 2.350764    |
| "Shc1"     | 4.3971388   | 4.6709881   | 4.6865094   | 4.69763695  | 4.6732575   | 4.5513771   | 4.525042    | 4.63995485  |
| "Shcbp1"   | 2.6328387   | 2.6085231   | 2.5329545   | 2.5661874   | 2.6288898   | 2.6184044   | 2.6403956   | 2.6284847   |
| "Shd"      | 2.5882375   | 2.6279895   | 2.5159793   | 2.5371468   | 2.573806    | 2.5649118   | 2.5359573   | 2.558632    |
| "She"      | 5.8930078   | 5.1607924   | 5.267273    | 5.568144    | 5.598686    | 5.5345573   | 5.9023075   | 5.6381435   |
| "Shf"      | 3.604689    | 3.717381    | 3.6662674   | 3.6978357   | 3.7375731   | 3.7288277   | 3.974376    | 3.7289818   |
| "Shfm1"    | 10.351981   | 10.2346755  | 10.3855225  | 10.1887685  | 10.07620175 | 10.051732   | 10.297606   | 10.297052   |
| "Shisa2"   | 2.8448869   | 2.8175111   | 2.70490195  | 2.77201555  | 2.9395921   | 2.9016671   | 2.8155061   | 2.89247585  |
| "Shisa5"   | 9.1644727   | 7.8668895   | 10.2331155  | 9.624294    | 8.66834775  | 8.2453428   | 9.01237425  | 8.767262    |
| "Shkbp1"   | 6.4968243   | 6.3135304   | 6.822485    | 6.6406994   | 6.389443    | 6.378107    | 6.47266     | 6.423966    |
| "Shmt1"    | 8.33097975  | 9.218348075 | 9.5635695   | 10.01392718 | 9.691077    | 9.387529575 | 9.663219875 | 9.471094175 |
| "Shmt2"    | 5.530431475 | 6.265328375 | 6.3116538   | 6.471527775 | 6.49465695  | 6.05595015  | 6.427512625 | 5.5055917   |
| "Shoc2"    | 5.77383875  | 5.5532029   | 5.3806001   | 5.4698029   | 5.53544605  | 6.0522373   | 5.45292215  | 5.63304485  |

|            |             |             |             |             |             |             |             |             |
|------------|-------------|-------------|-------------|-------------|-------------|-------------|-------------|-------------|
| "Shox2"    | 2.8049088   | 2.8876276   | 2.7396808   | 2.78037     | 2.815248    | 2.8006988   | 2.7074957   | 2.8108535   |
| "Shprh"    | 3.7530477   | 5.805972    | 5.7371736   | 6.096378    | 5.8544936   | 5.6347885   | 6.4271345   | 6.108596    |
| "Shroom1"  | 1.9734731   | 2.6575546   | 1.8930173   | 1.9643412   | 2.0952854   | 2.4893181   | 6.8094823   | 1.9570589   |
| "Shroom3"  | 2.743898633 | 3.022176    | 3.281344767 | 3.056111667 | 2.8642787   | 2.8742818   | 3.311258767 | 3.037575833 |
| "Siae"     | 5.279461533 | 5.450446067 | 6.689609333 | 7.077118433 | 6.328673067 | 6.0979716   | 7.066312033 | 7.0149145   |
| "Siah1a"   | 5.90070785  | 5.862342125 | 5.3834646   | 5.343667025 | 5.5981296   | 6.0281002   | 5.528263    | 5.4606735   |
| "Siah2"    | 6.37220335  | 5.45070585  | 5.98154955  | 5.7069147   | 6.1671387   | 5.89357755  | 6.1610125   | 6.39727405  |
| "Sidt2"    | 8.827265    | 9.110735    | 7.899569    | 8.39653     | 8.76841     | 9.056424    | 8.040466    | 8.306942    |
| "Sigirr"   | 6.8008385   | 6.470895    | 6.7778525   | 6.5331106   | 6.768937    | 7.6325955   | 6.6975803   | 6.6940303   |
| "Siglec1"  | 3.3959225   | 3.1186682   | 3.42050445  | 3.295141    | 3.2136019   | 3.461692    | 3.20844145  | 3.07410835  |
| "Siglec5"  | 2.9681952   | 2.9286857   | 3.3536284   | 2.8753765   | 3.257059    | 2.9609892   | 2.9247222   | 2.9721794   |
| "Sigmar1"  | 4.8926918   | 5.93712855  | 6.61631345  | 6.30849175  | 5.5790037   | 6.00777135  | 7.03379     | 6.39403625  |
| "Sik1"     | 9.079668    | 5.4663224   | 4.4802036   | 3.9112027   | 2.9434094   | 4.803093    | 3.7222955   | 3.6008987   |
| "Sike1"    | 3.7006636   | 3.7225979   | 4.4718078   | 4.133739425 | 3.774818375 | 4.07412825  | 4.32208995  | 3.7669236   |
| "Siil1"    | 8.912702    | 8.612529    | 9.147362    | 8.727528    | 9.122359    | 8.629262    | 8.918544    | 9.001213    |
| "Sim1"     | 2.6105554   | 2.5823425   | 2.5179845   | 2.54308485  | 2.61600185  | 2.60690295  | 2.5876677   | 2.61750435  |
| "Sim2"     | 2.4770875   | 2.4448245   | 2.3945334   | 2.423842    | 2.4703572   | 2.4643726   | 2.4600978   | 2.4502149   |
| "Sin3a"    | 4.534131533 | 4.752403333 | 4.657242767 | 4.7763176   | 4.8314002   | 4.637014633 | 4.5958662   | 4.653146367 |
| "Sin3b"    | 8.694821    | 9.479396667 | 8.936549333 | 8.857962667 | 9.058130667 | 9.092857333 | 8.933465667 | 8.975945667 |
| "Sip1"     | 6.793096    | 7.813173    | 6.1124325   | 6.690322    | 7.427516    | 7.8161554   | 7.1770134   | 7.279851    |
| "Sipa1"    | 2.5788221   | 2.3630502   | 3.3580875   | 2.6770904   | 2.3587687   | 2.5542886   | 2.685591    | 2.525916    |
| "Sipa1l2"  | 2.7556841   | 2.7367842   | 2.6024196   | 2.8551755   | 2.7507112   | 2.7477658   | 2.710861    | 3.3532348   |
| "Sirpa"    | 4.1968835   | 3.5832969   | 5.653440767 | 4.4332671   | 4.015795767 | 3.967322967 | 4.388466967 | 4.261150667 |
| "Sirt1"    | 8.384844    | 7.634202    | 7.2806797   | 7.5477085   | 7.2907677   | 8.1345005   | 7.672477    | 7.6405315   |
| "Sirt2"    | 7.9237485   | 7.64156     | 7.719103    | 7.873001    | 7.896076    | 7.713136    | 7.6090565   | 7.902828    |
| "Sirt3"    | 9.623015    | 9.841654    | 9.05448     | 9.735056    | 9.908936    | 9.900126    | 9.721139    | 9.940945    |
| "Sirt4"    | 2.928583    | 2.9597378   | 2.9041352   | 3.2249033   | 2.967287    | 2.9954658   | 3.1177065   | 3.4373534   |
| "Sirt7"    | 7.8948984   | 7.8832445   | 8.044504    | 8.330231    | 7.678535    | 7.9803257   | 7.999347    | 8.418658    |
| "Siva1"    | 4.460006175 | 4.51196365  | 5.4735086   | 5.099810175 | 4.031334575 | 4.04595505  | 4.933449875 | 4.76006675  |
| "Six1"     | 2.7889154   | 2.7632375   | 2.6279178   | 2.7264862   | 2.8384328   | 2.7808118   | 2.7841606   | 2.7797823   |
| "Six3"     | 2.53225385  | 2.50242705  | 2.4973152   | 2.45551165  | 2.52396275  | 2.520965    | 2.51012625  | 2.52393745  |
| "Six4"     | 2.4339166   | 2.4044697   | 2.3282883   | 2.3754203   | 2.4346142   | 2.4252214   | 2.422746    | 2.4137194   |
| "Six5"     | 2.6826282   | 2.7420552   | 2.8381984   | 2.64695     | 2.6764727   | 2.6635263   | 2.6660953   | 2.724178    |
| "Six6"     | 2.43382     | 2.4019325   | 2.342852    | 2.3857095   | 2.4220138   | 2.416939    | 2.4230738   | 2.4169977   |
| "Ska1"     | 2.75576365  | 2.73092775  | 2.63466445  | 2.6660609   | 2.78504955  | 2.7765464   | 2.73160985  | 2.8007995   |
| "Skap2"    | 9.127539    | 8.507577    | 9.282726    | 9.048474    | 8.383513    | 8.843425    | 8.628637    | 9.125739    |
| "Ski"      | 6.602735    | 5.99039     | 6.109568    | 5.6758184   | 6.4520125   | 6.6994486   | 6.016139    | 5.2113924   |
| "Skil"     | 7.11294925  | 6.5718426   | 6.2465292   | 6.032476    | 6.2431843   | 6.39823625  | 5.8713019   | 5.7804197   |
| "Skiv2l"   | 6.2830954   | 6.25778     | 6.275769    | 6.271875    | 6.4819145   | 6.315055    | 6.5063095   | 6.5067773   |
| "Skiv2l2"  | 5.4214624   | 5.46625375  | 5.2778553   | 5.2769411   | 5.45464005  | 5.511163    | 5.388701    | 5.4198521   |
| "Skp1a"    | 11.4404815  | 11.5649615  | 11.6629765  | 11.903766   | 11.618723   | 11.366118   | 12.0415     | 11.7743985  |
| "Skp2"     | 3.138921075 | 3.32432055  | 4.313739175 | 3.698094525 | 3.589197325 | 3.482844625 | 3.310771325 | 3.378112025 |
| "Sla"      | 7.9942365   | 7.287424    | 8.2394905   | 6.983433    | 7.744519    | 7.7016587   | 6.954051    | 6.4163413   |
| "Slain1"   | 3.0762131   | 3.0364094   | 3.0082355   | 2.969978    | 3.0627506   | 3.191434    | 3.023352    | 3.0668542   |
| "Slain2"   | 7.269624    | 7.54578     | 6.63807875  | 7.1447935   | 7.3632048   | 7.5714315   | 7.32404185  | 7.20756     |
| "Slamf1"   | 2.743418    | 2.733215    | 2.7073846   | 2.6822982   | 2.7532725   | 2.7501      | 2.742905    | 2.7632666   |
| "Slamf7"   | 2.5904286   | 2.562336    | 4.0022626   | 2.5659285   | 2.5977783   | 2.5896397   | 2.5875027   | 2.6689425   |
| "Slamf8"   | 2.1329114   | 2.0785124   | 3.9082634   | 2.461534    | 2.119219    | 1.9749241   | 2.2356203   | 2.0859659   |
| "Slamf9"   | 3.9976923   | 2.7712193   | 4.2146807   | 3.518765    | 3.1816108   | 2.8003504   | 3.1642544   | 3.11738     |
| "Slbp"     | 8.84272     | 8.675582    | 9.09038     | 8.671797    | 8.617274    | 8.529188    | 8.747793    | 8.716851    |
| "Slc10a1"  | 11.644781   | 12.740585   | 11.7867795  | 12.281093   | 13.270761   | 12.16609775 | 12.085394   | 12.357816   |
| "Slc10a2"  | 4.4728966   | 3.0448475   | 3.2710028   | 3.1303794   | 2.9247026   | 3.7215295   | 3.0309691   | 3.2857316   |
| "Slc10a3"  | 5.1349983   | 5.043484    | 4.8741393   | 4.7041197   | 4.7567973   | 5.288043    | 4.707952    | 4.861939    |
| "Slc10a6"  | 7.7052646   | 4.487883    | 2.9811196   | 2.5258324   | 2.636934    | 4.17671     | 2.4224646   | 2.4123013   |
| "Slc11a1"  | 9.032895    | 6.758244    | 8.45943     | 7.98263     | 7.1304903   | 7.4330044   | 7.4160547   | 7.0416474   |
| "Slc11a2"  | 5.0418696   | 4.3393025   | 5.783102533 | 4.839503667 | 4.013997467 | 4.194251233 | 3.755907733 | 4.504505433 |
| "Slc12a1"  | 3.0547242   | 3.0344293   | 2.9288945   | 2.976866    | 3.0919592   | 3.08693     | 2.992004    | 3.0524867   |
| "Slc12a2"  | 6.373190567 | 6.1869774   | 5.969213667 | 5.8244888   | 5.792075333 | 6.029005667 | 5.719109933 | 5.7949196   |
| "Slc12a4"  | 6.826184    | 7.210201    | 5.222102    | 7.080102    | 6.464243    | 7.3303103   | 5.196826    | 7.2794747   |
| "Slc12a5"  | 2.97973315  | 2.75642265  | 3.1088266   | 3.38449735  | 2.8294119   | 2.78433575  | 3.4832265   | 3.6311801   |
| "Slc12a6"  | 4.492152    | 4.204024    | 4.5573725   | 4.5292222   | 4.4798263   | 4.66960085  | 5.43741525  | 4.4923377   |
| "Slc12a7"  | 4.8890483   | 5.33045005  | 5.607734    | 5.71989895  | 5.6267566   | 5.5008981   | 5.7111506   | 6.0937947   |
| "Slc12a8"  | 2.6290984   | 2.5997722   | 2.5516782   | 2.565129    | 2.6163585   | 2.6250918   | 2.6185308   | 2.6020834   |
| "Slc12a9"  | 4.3781943   | 5.3796954   | 5.243065    | 5.484636    | 5.347594    | 5.333385    | 5.3484206   | 5.7520785   |
| "Slc13a3"  | 7.1832585   | 6.169775    | 8.135034    | 7.2565325   | 7.6252647   | 6.00051765  | 8.676855    | 6.897418    |
| "Slc14a1"  | 2.663957    | 2.63514495  | 2.5995286   | 2.58355895  | 2.6584444   | 2.65447425  | 2.6373612   | 2.6569191   |
| "Slc14a2"  | 2.4913067   | 2.463995    | 2.41749955  | 2.41109025  | 2.4985943   | 2.49129745  | 2.48446785  | 2.51970415  |
| "Slc15a1"  | 2.8908997   | 2.8950462   | 2.7699053   | 2.8660357   | 2.949215    | 2.9102309   | 2.8434997   | 3.0072665   |
| "Slc15a2"  | 4.6395125   | 2.8505037   | 3.1069014   | 5.482808    | 2.8721707   | 3.3136027   | 6.188601    | 3.2500448   |
| "Slc15a3"  | 7.7822948   | 5.0012727   | 7.480974    | 6.60062     | 5.894931    | 5.076036    | 6.1837144   | 5.3769956   |
| "Slc15a4"  | 8.846555    | 7.6164      | 7.7393465   | 8.190811    | 7.9071293   | 8.757804    | 7.853387    | 7.769161    |
| "Slc15a5"  | 2.637202    | 2.6229932   | 2.5061061   | 2.5700128   | 2.6487982   | 2.6493096   | 2.6252005   | 2.6457963   |
| "Slc16a1"  | 10.573785   | 11.086541   | 10.868261   | 9.97763     | 10.920312   | 10.942839   | 10.82238    | 10.136712   |
| "Slc16a11" | 4.7348905   | 4.8567634   | 4.492037    | 4.8279595   | 5.4842367   | 4.8724055   | 4.8842483   | 5.375836    |
| "Slc16a2"  | 5.84586335  | 7.0209415   | 7.6159667   | 8.25948015  | 8.0008975   | 6.6587515   | 8.3580305   | 8.07771585  |
| "Slc16a6"  | 8.525299    | 4.802006    | 5.662799    | 5.4760056   | 5.810912    | 4.569831    | 5.256136    | 4.883663    |
| "Slc16a7"  | 10.280445   | 10.196517   | 10.650976   | 10.647586   | 10.691744   | 9.916732    | 10.969876   | 10.406455   |
| "Slc16a8"  | 2.4751313   | 2.4407563   | 2.930316    | 2.4203362   | 2.3927054   | 2.4509418   | 2.4609115   | 2.4454935   |
| "Slc17a1"  | 8.967494    | 8.130751    | 8.818926    | 8.467328    | 8.359221    | 8.795858    | 8.212326    | 7.9472694   |
| "Slc17a2"  | 11.129299   | 10.4085395  | 10.070854   | 10.392105   | 10.503435   | 10.490183   | 10.7651715  | 10.98964275 |
| "Slc17a3"  | 6.8665037   | 8.454857    | 9.30693     | 9.522959    | 8.658116    | 8.684886    | 9.3110695   | 9.644485    |

|            |             |             |             |             |             |             |             |             |
|------------|-------------|-------------|-------------|-------------|-------------|-------------|-------------|-------------|
| "Slc17a6"  | 2.6594338   | 2.6395625   | 2.54570235  | 2.59185285  | 2.679751    | 2.65446755  | 2.64854445  | 2.68298685  |
| "Slc17a9"  | 3.2544494   | 3.3073452   | 3.291739    | 3.2944016   | 3.6082537   | 3.321386    | 2.9715066   | 3.3151438   |
| "Slc18a1"  | 2.1390526   | 2.7411573   | 2.1653552   | 2.1033795   | 2.1371489   | 2.1312428   | 1.9263884   | 2.1259634   |
| "Slc19a1"  | 5.91419315  | 7.0952862   | 5.583866    | 5.90531705  | 6.3346697   | 6.8139329   | 4.9549775   | 5.96060765  |
| "Slc19a2"  | 6.6350999   | 6.604797    | 6.4605486   | 6.2963549   | 6.36862435  | 6.37411545  | 6.2955431   | 6.3911966   |
| "Slc1a1"   | 2.575512    | 2.5463936   | 2.4607303   | 2.504886    | 2.574164    | 2.575944    | 2.5589178   | 2.567138    |
| "Slc1a2"   | 7.7364964   | 7.7250023   | 5.923797    | 7.331103    | 8.089852    | 7.7144346   | 7.6837864   | 7.475931    |
| "Slc1a3"   | 2.7045124   | 2.68409835  | 2.6194874   | 2.6320165   | 2.7437581   | 2.7104815   | 2.6972518   | 2.71585575  |
| "Slc1a4"   | 3.586306    | 3.0761186   | 3.99458865  | 3.42644355  | 3.63187645  | 3.2021522   | 4.3336026   | 3.11878145  |
| "Slc1a5"   | 5.146374    | 5.49355     | 5.9054627   | 4.895472    | 5.464372    | 5.568427    | 4.9090695   | 4.593369    |
| "Slc20a1"  | 10.4323155  | 7.88157     | 6.5404935   | 7.0015465   | 6.81706595  | 6.5597867   | 6.00593835  | 6.41761385  |
| "Slc20a2"  | 5.4054476   | 6.3265347   | 5.75305675  | 5.8433599   | 6.2181638   | 6.1107606   | 5.7477795   | 6.0284589   |
| "Slc22a1"  | 9.427864    | 9.942303    | 10.108327   | 10.603202   | 10.884222   | 9.819738    | 11.048901   | 10.740599   |
| "Slc22a12" | 2.5387942   | 2.533177    | 2.4752715   | 2.48488795  | 2.57873985  | 2.5789026   | 2.53913285  | 2.570637    |
| "Slc22a18" | 6.37602185  | 7.18480415  | 8.2361765   | 7.68585485  | 6.9913948   | 6.7035589   | 7.50484385  | 7.811889    |
| "Slc22a19" | 2.5023208   | 2.4687438   | 2.3829374   | 2.4189484   | 2.4989986   | 2.480727    | 2.490486    | 2.4734747   |
| "Slc22a21" | 2.5986896   | 2.5062537   | 2.4271808   | 2.4735973   | 2.5261166   | 2.5231993   | 2.5183585   | 2.5275655   |
| "Slc22a23" | 6.5868177   | 7.717222    | 7.326577    | 7.6642065   | 8.061082    | 7.5562587   | 8.083515    | 8.224942    |
| "Slc22a26" | 10.3261865  | 6.18915515  | 9.6779135   | 9.31425     | 8.639031    | 7.30314515  | 8.4830945   | 6.32756755  |
| "Slc22a27" | 6.8028736   | 2.197813    | 7.823599    | 5.7339945   | 7.409479    | 4.2528906   | 8.557091    | 4.915484    |
| "Slc22a29" | 6.4125275   | 2.77987945  | 7.65275535  | 4.38579895  | 7.086822    | 3.35879935  | 8.7602355   | 3.96981595  |
| "Slc22a3"  | 5.1940107   | 5.918251    | 3.9325657   | 4.9396467   | 5.442449    | 3.757406    | 5.367489    | 4.0896645   |
| "Slc22a30" | 8.022041    | 9.242965    | 9.979953    | 10.644886   | 8.989389    | 8.291512    | 10.557918   | 11.136856   |
| "Slc22a4"  | 3.4012165   | 3.8564334   | 3.515198    | 3.5944118   | 3.5508642   | 3.4104307   | 3.55268     | 3.5379589   |
| "Slc22a5"  | 8.014157    | 9.088318    | 7.513634    | 8.343992    | 9.207611    | 9.84296     | 8.089441    | 8.320593    |
| "Slc22a6"  | 3.087373    | 3.154317    | 2.9691367   | 2.978243    | 3.1116707   | 3.1489868   | 3.0367203   | 3.1065779   |
| "Slc22a7"  | 2.7354717   | 5.16658     | 4.9456606   | 8.483089    | 4.9870505   | 5.3819656   | 7.4797945   | 8.829427    |
| "Slc23a1"  | 6.554335    | 7.934594    | 8.0892755   | 8.29671     | 7.31921025  | 7.12167765  | 7.68022075  | 7.53876335  |
| "Slc23a2"  | 6.154267    | 5.580922    | 6.352191    | 6.5903306   | 6.397401    | 5.916761    | 6.854039    | 6.9854145   |
| "Slc24a3"  | 2.5134256   | 2.4535048   | 2.4796882   | 2.5225172   | 2.475921    | 2.4690697   | 2.481833    | 2.4800725   |
| "Slc24a6"  | 9.299625    | 8.434819    | 8.250492    | 8.720101    | 8.464763    | 9.136381    | 8.568467    | 9.0463085   |
| "Slc25a10" | 5.87085115  | 7.1993125   | 6.7976977   | 7.212007    | 7.41358135  | 6.706075    | 7.163584    | 7.1691885   |
| "Slc25a11" | 7.64042     | 8.189468    | 8.181564    | 8.098553    | 8.190616    | 7.9424844   | 8.121578    | 8.361014    |
| "Slc25a13" | 9.139418    | 10.17549    | 9.673563    | 10.255129   | 10.4910145  | 10.116574   | 10.106472   | 10.436609   |
| "Slc25a14" | 3.6213434   | 3.2265193   | 3.5701883   | 3.589755    | 3.5995333   | 4.068328    | 3.6685805   | 3.6124797   |
| "Slc25a15" | 10.9314955  | 9.939653    | 9.42270415  | 9.519237    | 9.9584135   | 10.24392635 | 9.5884942   | 9.2140135   |
| "Slc25a17" | 8.484404    | 9.099934    | 9.460175    | 9.2975445   | 8.060851    | 8.618616    | 8.553137    | 8.917223    |
| "Slc25a19" | 3.0342833   | 2.9377222   | 2.813397367 | 2.9021531   | 2.963334833 | 2.958781567 | 2.8694521   | 2.926030667 |
| "Slc25a20" | 10.282615   | 11.65683    | 10.0865775  | 10.75815325 | 11.7044855  | 11.538809   | 11.333473   | 11.0256335  |
| "Slc25a22" | 10.386574   | 9.04995     | 7.5378456   | 8.145022    | 9.032415    | 8.914748    | 8.586922    | 8.597413    |
| "Slc25a23" | 6.8099504   | 6.911645    | 7.965534    | 8.488571    | 7.86217     | 7.0173936   | 8.419475    | 8.492761    |
| "Slc25a24" | 2.7381496   | 2.3618126   | 2.3579857   | 2.3374271   | 2.3808227   | 2.3711505   | 2.3748827   | 2.3656335   |
| "Slc25a25" | 8.785505    | 6.487537    | 4.3422      | 4.0656385   | 4.514793    | 7.110661    | 4.234961    | 4.6628127   |
| "Slc25a26" | 3.56498195  | 3.58554865  | 3.54713895  | 3.64414     | 3.77809835  | 3.56346185  | 3.6123704   | 3.61129825  |
| "Slc25a28" | 8.459268    | 8.763893    | 7.166107    | 7.2287507   | 7.3877506   | 7.5542154   | 6.822099    | 7.2631645   |
| "Slc25a29" | 3.33936185  | 3.0240978   | 2.65319335  | 2.50937895  | 2.726848925 | 2.84708215  | 2.8604228   | 2.613413175 |
| "Slc25a30" | 6.534918667 | 8.887210667 | 4.999556967 | 5.595357233 | 8.307796833 | 8.7714311   | 6.472302333 | 7.873405    |
| "Slc25a33" | 11.006799   | 9.253424    | 7.6679354   | 7.715874    | 8.081504    | 9.740519    | 8.701069    | 8.489483    |
| "Slc25a35" | 2.1879916   | 2.1549575   | 2.3952684   | 2.137994    | 2.17777     | 2.1668746   | 2.1809082   | 2.1658075   |
| "Slc25a36" | 5.2779439   | 4.5361103   | 5.1468652   | 5.081898    | 4.9405801   | 4.936616    | 5.05404435  | 4.80079135  |
| "Slc25a37" | 7.215752    | 7.1936665   | 7.320076    | 7.5494275   | 7.232207    | 6.7830076   | 7.058076    | 7.8231807   |
| "Slc25a38" | 5.8393044   | 5.8203034   | 6.0012856   | 5.8560514   | 5.8647413   | 6.151197    | 6.099537    | 5.9105434   |
| "Slc25a39" | 11.37555467 | 11.99222167 | 11.10718737 | 11.66886533 | 11.552476   | 11.81317    | 11.29043967 | 11.40833933 |
| "Slc25a4"  | 8.113886333 | 7.126325867 | 8.421576    | 7.620914667 | 7.4327987   | 6.9150478   | 7.760834767 | 7.245178    |
| "Slc25a42" | 5.678047    | 6.285317    | 4.2861605   | 5.4020023   | 6.6922107   | 6.706257    | 5.9118357   | 5.7492385   |
| "Slc25a44" | 6.35918855  | 5.8576882   | 6.17117405  | 6.508209    | 6.36274785  | 6.20300225  | 6.199634    | 6.207887    |
| "Slc25a45" | 5.4785624   | 7.82244     | 7.490213    | 7.3765383   | 7.6185093   | 7.5498953   | 7.468588    | 7.180729    |
| "Slc25a46" | 9.60959975  | 9.8453825   | 9.0202715   | 9.4659755   | 9.51592875  | 9.69695     | 9.5507485   | 9.5871955   |
| "Slc25a47" | 13.89319    | 13.769359   | 12.2181225  | 13.255986   | 14.164783   | 13.764001   | 13.264676   | 13.478067   |
| "Slc25a5"  | 11.42221088 | 11.77500444 | 11.60808444 | 11.35184613 | 11.68443625 | 11.66155569 | 11.66492056 | 11.53819875 |
| "Slc26a1"  | 7.2783403   | 8.489496    | 8.934395    | 9.038351    | 9.314833    | 8.523775    | 8.565623    | 8.734742    |
| "Slc26a2"  | 3.8908939   | 3.77488575  | 4.38912435  | 4.42381775  | 4.274025    | 3.9855225   | 4.2735391   | 4.75028845  |
| "Slc26a3"  | 2.6105797   | 2.594516    | 2.5213284   | 2.5656118   | 2.6077242   | 2.639815    | 2.5953856   | 2.6388314   |
| "Slc26a8"  | 2.4609256   | 2.488565    | 2.371577    | 2.412094    | 2.457878    | 2.4540598   | 2.4483244   | 2.440363    |
| "Slc27a1"  | 2.746327    | 2.7237203   | 2.6816466   | 2.7066565   | 2.7452252   | 2.734949    | 2.743213    | 2.7296958   |
| "Slc27a2"  | 13.541856   | 14.2552185  | 13.168851   | 14.0329075  | 14.382699   | 14.356604   | 14.118098   | 14.308403   |
| "Slc27a4"  | 5.904769    | 5.9127603   | 5.586457    | 5.7457056   | 5.7167425   | 6.13793     | 5.679864    | 5.665418    |
| "Slc27a5"  | 13.311673   | 13.4350605  | 13.302312   | 13.579581   | 13.67018    | 13.512966   | 13.511072   | 13.695905   |
| "Slc28a3"  | 2.6456106   | 2.6187785   | 2.5504208   | 2.5818722   | 2.6899626   | 2.6379163   | 2.6201997   | 2.6252394   |
| "Slc29a1"  | 7.3118005   | 7.76996     | 6.6033006   | 6.8284273   | 6.553028    | 7.386765    | 6.8149433   | 6.1376705   |
| "Slc29a3"  | 3.955006    | 3.6787636   | 5.3086433   | 4.301471    | 3.6831415   | 3.9681487   | 4.0097094   | 4.086849    |
| "Slc2a1"   | 8.8374699   | 7.27555433  | 6.928233133 | 6.555565667 | 5.322062533 | 6.2744493   | 6.2275142   | 5.8487381   |
| "Slc2a10"  | 2.5209956   | 2.4936798   | 2.4850817   | 2.4830627   | 2.5139925   | 2.5048294   | 2.5097203   | 2.4980068   |
| "Slc2a2"   | 9.768003    | 11.631985   | 10.978306   | 12.317071   | 12.73575    | 10.974357   | 12.385377   | 12.4781685  |
| "Slc2a3"   | 3.200886267 | 2.6395513   | 3.032939167 | 2.835007833 | 2.356867033 | 2.898116367 | 2.674030767 | 2.582843233 |
| "Slc2a4"   | 3.239882    | 3.2163758   | 3.200613    | 3.2024448   | 3.25326     | 3.2269895   | 3.1412358   | 3.2203732   |
| "Slc2a5"   | 3.8543386   | 4.1164227   | 3.9534287   | 5.516642    | 4.727694    | 4.098097    | 3.9430707   | 4.355017    |
| "Slc2a8"   | 4.755071    | 5.224806    | 4.726705    | 4.753235    | 4.782678    | 4.7641196   | 4.6615534   | 4.8719063   |
| "Slc2a9"   | 4.0750074   | 4.4551654   | 5.7660275   | 6.242909    | 5.523757    | 4.3992176   | 5.666527    | 6.025135    |
| "Slc30a1"  | 7.694403    | 7.053047    | 6.2943964   | 6.113674    | 6.127689    | 6.6477447   | 6.137939    | 6.6608353   |
| "Slc30a3"  | 3.484838    | 3.513012    | 3.4889216   | 3.4922318   | 3.5147252   | 3.5163417   | 3.35823     | 3.7544012   |

|            |             |             |             |             |             |             |             |             |
|------------|-------------|-------------|-------------|-------------|-------------|-------------|-------------|-------------|
| "Slc30a4"  | 7.308216    | 7.6680503   | 7.2680283   | 7.287129    | 7.161413    | 7.0905714   | 7.221929    | 7.4066215   |
| "Slc30a5"  | 8.210005    | 8.727047    | 8.8118      | 8.763575    | 8.884347    | 8.778912    | 8.578375    | 8.834267    |
| "Slc30a6"  | 7.5624294   | 7.6401415   | 7.7601194   | 7.6468544   | 7.36981     | 7.7120695   | 7.487801    | 7.603305    |
| "Slc30a7"  | 6.335726    | 6.936375    | 6.589243    | 6.4650154   | 6.4170275   | 6.423899    | 6.5706806   | 6.6940465   |
| "Slc30a9"  | 9.365105    | 9.649935    | 9.04769     | 9.317883    | 9.683195    | 9.755691    | 9.600357    | 9.929272    |
| "Slc31a1"  | 8.44861     | 9.06410675  | 9.714065    | 9.9888395   | 9.548286    | 9.027099    | 9.830608    | 10.04817775 |
| "Slc31a2"  | 4.1565411   | 4.03721     | 4.6073048   | 4.1821164   | 4.20462435  | 4.0718086   | 4.11606595  | 4.3458576   |
| "Slc32a1"  | 3.2370708   | 3.572957    | 3.1418962   | 3.1735168   | 3.2232208   | 3.228322    | 2.8625503   | 3.2254527   |
| "Slc33a1"  | 9.111574    | 9.269309    | 9.52834     | 9.298319    | 9.936125    | 9.542083    | 10.363115   | 9.935075    |
| "Slc34a2"  | 7.127187    | 10.096439   | 9.921766    | 9.575271    | 9.539712    | 9.835031    | 11.309904   | 7.9897566   |
| "Slc35a1"  | 7.4373965   | 7.42272425  | 8.00483135  | 7.7936823   | 7.219408    | 7.56016585  | 8.024109    | 7.9099928   |
| "Slc35a2"  | 4.428663475 | 4.29730655  | 4.21004225  | 4.256534325 | 4.29524025  | 4.2517132   | 4.280990075 | 4.352594875 |
| "Slc35a3"  | 4.7197939   | 4.9854207   | 4.8511283   | 4.9954791   | 5.26714535  | 5.33945075  | 5.01131535  | 5.1551335   |
| "Slc35a4"  | 4.771381    | 4.5709209   | 4.639167    | 4.49455405  | 4.7339319   | 4.3971112   | 4.39322185  | 4.513058    |
| "Slc35a5"  | 5.52180125  | 5.707720325 | 5.821709925 | 6.1570535   | 5.8994236   | 5.9574013   | 6.118364875 | 5.949778075 |
| "Slc35b1"  | 8.338625    | 9.205039    | 8.740845    | 8.748959    | 9.841272    | 9.08754     | 8.683878    | 9.174454    |
| "Slc35b2"  | 4.8988237   | 5.845338    | 5.4001417   | 5.5779123   | 6.0454917   | 5.784197    | 4.9350615   | 5.821682    |
| "Slc35b3"  | 8.583456    | 8.651439    | 8.5129385   | 8.3277      | 8.350709    | 8.199697    | 8.117396    | 8.53003     |
| "Slc35b4"  | 3.8495358   | 4.22640995  | 4.2479853   | 4.0410459   | 3.99818065  | 3.8422205   | 4.3040013   | 3.9898274   |
| "Slc35c1"  | 5.555774    | 5.08717     | 5.056206    | 5.110805    | 5.356355    | 5.453605    | 5.085805    | 4.831178    |
| "Slc35c2"  | 4.07055175  | 4.26136555  | 4.34532235  | 4.1971974   | 4.4901143   | 4.50997765  | 4.472234    | 4.1245935   |
| "Slc35d1"  | 9.8508625   | 10.1793375  | 11.414101   | 10.791974   | 10.225552   | 9.569388    | 9.657747    | 10.176217   |
| "Slc35e1"  | 6.60313125  | 7.0260725   | 6.4694285   | 6.1877811   | 6.37334135  | 6.40627165  | 6.0612223   | 6.141868    |
| "Slc35e4"  | 3.1305514   | 3.10301605  | 3.01368515  | 3.0987877   | 3.130815    | 3.25503875  | 3.10507765  | 3.11140025  |
| "Slc35f4"  | 2.3702      | 2.3404822   | 2.2973444   | 2.3197222   | 2.368836    | 2.3604572   | 2.35902     | 2.3624303   |
| "Slc35f5"  | 9.562933    | 9.406606    | 10.1653185  | 9.783234    | 9.255265    | 9.475332    | 9.479346    | 9.513984    |
| "Slc37a1"  | 4.7717247   | 3.910416    | 5.3756857   | 4.2678394   | 3.2064428   | 4.398349    | 3.2479377   | 4.159498    |
| "Slc37a2"  | 2.8397646   | 2.7171218   | 3.6045775   | 2.9602103   | 2.736203    | 2.6632223   | 2.7396262   | 2.7134018   |
| "Slc37a3"  | 6.0904155   | 5.8692878   | 5.88475985  | 5.315111    | 5.39672235  | 5.5019929   | 5.65221275  | 5.575635    |
| "Slc37a4"  | 11.108225   | 12.382088   | 10.341958   | 11.426134   | 12.477455   | 12.068285   | 10.550131   | 11.348509   |
| "Slc38a10" | 6.23392835  | 6.31181905  | 6.3716197   | 6.3125094   | 6.314779367 | 6.20392255  | 6.153979117 | 6.259601467 |
| "Slc38a2"  | 13.130219   | 11.499905   | 10.824969   | 10.683834   | 11.33907    | 11.956617   | 10.813292   | 11.3026     |
| "Slc38a3"  | 11.674802   | 11.795167   | 12.253094   | 12.728941   | 12.161304   | 11.478788   | 12.132404   | 12.620864   |
| "Slc38a4"  | 12.8431985  | 12.6379175  | 12.085049   | 12.77297    | 12.563806   | 12.802129   | 12.44130875 | 12.6403295  |
| "Slc39a1"  | 10.192004   | 10.057603   | 10.500185   | 10.391528   | 10.135083   | 10.309419   | 10.20979    | 10.273551   |
| "Slc39a11" | 6.8892317   | 7.7904625   | 7.913685    | 8.138138    | 7.9555445   | 7.4678273   | 7.7661867   | 8.017981    |
| "Slc39a13" | 4.121105    | 4.11978     | 4.0698695   | 4.240696    | 4.2535243   | 4.129081    | 4.136027    | 4.123       |
| "Slc39a14" | 7.74650585  | 6.55689305  | 6.07736955  | 5.80314425  | 5.95482975  | 5.66219535  | 5.2992881   | 5.667774    |
| "Slc39a3"  | 3.1653191   | 3.44992765  | 3.22608615  | 3.364269    | 3.10772085  | 3.7177145   | 3.05705     | 3.0021955   |
| "Slc39a4"  | 7.9141006   | 7.642749    | 8.812559    | 7.9059367   | 6.5493565   | 6.185329    | 6.956843    | 7.794237    |
| "Slc39a6"  | 7.502232    | 6.1902976   | 6.4435434   | 5.3220377   | 6.260997    | 6.9865646   | 5.6751747   | 5.76173     |
| "Slc39a7"  | 9.4296665   | 9.496446    | 9.371627    | 8.869379    | 9.849155    | 9.404794    | 8.892101    | 9.421937    |
| "Slc39a8"  | 6.2319939   | 5.4063766   | 6.094931    | 5.80035075  | 5.6402807   | 5.5765167   | 6.6009012   | 5.7193179   |
| "Slc39a9"  | 7.036785    | 7.004126    | 7.638129    | 7.545711    | 7.5306883   | 7.19746     | 7.7381277   | 7.524811    |
| "Slc3a1"   | 11.5917425  | 10.144453   | 11.780337   | 10.89133    | 10.921036   | 11.864221   | 10.570223   | 11.036358   |
| "Slc3a2"   | 8.916119    | 7.9570403   | 8.441477    | 7.5677238   | 7.7807536   | 8.615875    | 7.8544703   | 7.479288    |
| "Slc40a1"  | 10.7362735  | 10.616293   | 11.3593145  | 11.168198   | 11.1419575  | 11.076713   | 10.8624195  | 11.030032   |
| "Slc41a1"  | 4.3394327   | 4.889137    | 5.3508344   | 6.358178    | 4.8358088   | 4.838719    | 4.718858    | 5.782736    |
| "Slc41a2"  | 10.823864   | 7.4227624   | 10.877644   | 10.013672   | 8.939225    | 8.284746    | 8.747767    | 9.926179    |
| "Slc41a3"  | 3.432893267 | 3.414202433 | 3.3490729   | 3.186987567 | 3.659795567 | 4.235163267 | 3.1616563   | 3.148960467 |
| "Slc43a3"  | 8.355786    | 8.3441725   | 7.604127    | 7.871128    | 8.550766    | 8.1289425   | 7.8396277   | 7.801071    |
| "Slc44a1"  | 7.1956532   | 7.03320725  | 7.8936095   | 7.3823391   | 7.1102585   | 7.0138563   | 7.342493    | 7.240026    |
| "Slc44a2"  | 4.487891    | 3.996471933 | 4.810093767 | 4.444413167 | 4.400167    | 4.3539102   | 4.571406333 | 4.481488367 |
| "Slc44a3"  | 3.4758072   | 3.4859343   | 5.0502687   | 5.356017    | 4.415709    | 3.3179798   | 5.2156987   | 4.129951    |
| "Slc45a3"  | 8.3443425   | 7.68737935  | 7.0469986   | 5.61966265  | 8.666189    | 7.50472045  | 6.7091215   | 4.02939305  |
| "Slc46a1"  | 6.252817    | 6.2716123   | 6.6393985   | 6.90971975  | 6.378549    | 6.25750535  | 6.95081965  | 6.92582655  |
| "Slc46a2"  | 2.5374951   | 2.5082026   | 2.47045     | 2.4931517   | 2.5333369   | 2.5247948   | 2.5262785   | 2.5192554   |
| "Slc46a3"  | 5.8861027   | 6.915861    | 7.1984844   | 8.175945    | 6.962438    | 5.9054165   | 7.0688      | 7.8769245   |
| "Slc47a1"  | 9.429291    | 10.355518   | 10.528536   | 11.276128   | 11.083798   | 9.992529    | 11.0215435  | 10.516069   |
| "Slc48a1"  | 6.8607633   | 7.1536732   | 7.5629762   | 7.13760715  | 6.7807293   | 6.3618055   | 6.42114085  | 6.346693    |
| "Slc4a1"   | 3.919085933 | 3.532699633 | 2.9008276   | 3.7341269   | 4.415210333 | 4.371090067 | 3.879567367 | 3.036567567 |
| "Slc4a10"  | 2.3897026   | 2.3617024   | 2.318931    | 2.3227453   | 2.385762    | 2.3764534   | 2.3797283   | 2.3727052   |
| "Slc4a1ap" | 6.8690643   | 7.0583763   | 6.7025156   | 6.7273936   | 7.0759096   | 7.109254    | 6.8276453   | 6.675819    |
| "Slc4a2"   | 5.218385    | 5.406244    | 5.9353166   | 5.794622    | 5.590021    | 5.66951     | 5.6865273   | 5.8003597   |
| "Slc4a4"   | 9.588749833 | 9.105713667 | 8.962939333 | 9.018594333 | 9.577199333 | 9.093836167 | 9.105638333 | 8.662335    |
| "Slc4a7"   | 8.283385    | 7.941582    | 7.2170157   | 7.4492908   | 7.5041747   | 7.8897834   | 7.5199766   | 7.8260493   |
| "Slc4a8"   | 2.7657902   | 2.7452729   | 2.694678    | 2.715931    | 2.7813506   | 2.7796228   | 2.75967     | 2.7892556   |
| "Slc50a1"  | 5.068849    | 5.5874233   | 5.642782    | 6.254915    | 5.6014686   | 5.5023947   | 5.613419    | 5.7416086   |
| "Slc52a2"  | 5.32708125  | 6.2674564   | 5.24215855  | 5.3070507   | 5.707980175 | 5.66682675  | 5.12530805  | 5.45100395  |
| "Slc52a3"  | 2.4807327   | 2.4485924   | 2.4196806   | 2.427828    | 2.4712234   | 2.4569514   | 2.4643145   | 2.4530246   |
| "Slc5a1"   | 2.8768491   | 2.8771317   | 2.7430353   | 2.80186545  | 2.9480848   | 2.9172056   | 2.869743    | 2.9645962   |
| "Slc5a2"   | 4.672112    | 5.0382233   | 4.48125     | 4.8243027   | 5.466193    | 4.740137    | 5.2992163   | 5.2813015   |
| "Slc5a3"   | 2.431462    | 2.3980653   | 2.3609078   | 2.360053    | 2.4193664   | 2.4155197   | 2.4152527   | 2.4030538   |
| "Slc5a6"   | 4.5895376   | 4.5806932   | 4.5446362   | 4.828176    | 4.8649044   | 4.596472    | 4.596552    | 4.7178125   |
| "Slc6a1"   | 2.6672761   | 2.7107165   | 2.5474145   | 2.605602    | 2.6826804   | 2.7404907   | 2.5678725   | 2.8372707   |
| "Slc6a12"  | 6.3008347   | 6.8684587   | 6.963516    | 6.911162    | 6.7055016   | 6.0027804   | 6.975619    | 6.7851896   |
| "Slc6a13"  | 8.7211685   | 9.152151    | 9.653452    | 9.7990885   | 9.764772    | 9.465281    | 9.772522    | 9.924039    |
| "Slc6a14"  | 2.8241644   | 2.7955837   | 2.68825805  | 2.725894    | 2.84793365  | 2.8446858   | 2.7784573   | 2.8399968   |
| "Slc6a15"  | 2.548286    | 2.51939     | 2.4546824   | 2.4895992   | 2.5665128   | 2.5447867   | 2.5305707   | 2.586988    |
| "Slc6a18"  | 2.5152586   | 2.4901123   | 2.4956908   | 2.4424667   | 2.4993885   | 2.5084498   | 2.5024917   | 2.5017755   |
| "Slc6a20a" | 2.4235294   | 2.3988647   | 2.316407    | 2.3554862   | 2.4184427   | 2.4181736   | 2.4117808   | 2.406951    |

|            |             |             |             |             |             |             |             |             |
|------------|-------------|-------------|-------------|-------------|-------------|-------------|-------------|-------------|
| "Slc6a3"   | 2.3122468   | 2.2359972   | 2.235134    | 2.2433715   | 2.299411    | 2.5236423   | 2.2919106   | 2.2835417   |
| "Slc6a5"   | 2.4953119   | 2.466155    | 2.378767    | 2.4145384   | 2.4935756   | 2.4787495   | 2.4752257   | 2.4881325   |
| "Slc6a6"   | 4.61553625  | 4.2084441   | 4.8891798   | 4.703658    | 4.7362478   | 4.6019801   | 4.7924925   | 5.18214735  |
| "Slc6a8"   | 4.3929652   | 4.4688817   | 3.7299044   | 3.56721045  | 4.27164305  | 4.50634555  | 3.70841     | 4.0982645   |
| "Slc6a9"   | 4.57398665  | 6.08366225  | 4.331666    | 4.8814396   | 5.38078325  | 5.68277085  | 4.62373695  | 5.07076325  |
| "Slc7a1"   | 2.417958    | 2.3970013   | 2.313318    | 2.393369    | 2.4248686   | 2.4133272   | 2.4204946   | 2.4064045   |
| "Slc7a13"  | 2.55698085  | 2.5251093   | 2.46730305  | 2.4868095   | 2.5486169   | 2.55527065  | 2.5361805   | 2.5676988   |
| "Slc7a2"   | 8.463720333 | 7.710826333 | 6.4782079   | 7.313926067 | 6.569052833 | 7.771627233 | 6.777457667 | 6.874573467 |
| "Slc7a3"   | 2.49341     | 2.3563552   | 2.330689    | 2.3220203   | 2.3834224   | 2.3729138   | 2.3628397   | 2.367972    |
| "Slc7a4"   | 1.92194865  | 2.2278584   | 2.2581095   | 1.91345975  | 1.97855175  | 2.0893465   | 1.91384805  | 1.9946148   |
| "Slc7a5"   | 5.022501    | 2.8473077   | 3.6744342   | 3.109051    | 3.1651633   | 3.1583495   | 2.88694     | 3.150338    |
| "Slc7a6"   | 2.3617966   | 2.3413868   | 2.279466    | 2.3082132   | 2.4259148   | 2.3555462   | 2.3511026   | 2.351199    |
| "Slc7a7"   | 4.392271    | 3.8506365   | 5.5975733   | 4.0223064   | 3.5871      | 4.0546517   | 3.9731696   | 3.5534887   |
| "Slc7a8"   | 4.2081046   | 3.125237    | 4.7280583   | 4.176183    | 3.7025626   | 3.6652436   | 4.3546367   | 3.8096988   |
| "Slc8a1"   | 2.5305663   | 2.5076921   | 2.442295    | 2.47507835  | 2.5362      | 2.52538335  | 2.51219865  | 2.53318905  |
| "Slc9a1"   | 5.8857746   | 5.9313774   | 5.8803477   | 5.920984    | 6.0739913   | 5.886113    | 5.885774    | 5.8683996   |
| "Slc9a3r1" | 10.0167865  | 9.2345009   | 10.42276067 | 10.76776783 | 9.498807    | 8.817990333 | 9.931729333 | 10.75040133 |
| "Slc9a3r2" | 3.6448172   | 3.65772678  | 3.49657696  | 3.66562022  | 3.67770202  | 3.64774644  | 3.8380788   | 3.84036768  |
| "Slc9a8"   | 3.8199661   | 3.83441225  | 3.925274    | 3.8917484   | 3.92201725  | 3.93837285  | 3.94313155  | 4.0847622   |
| "Slco1a1"  | 2.3942778   | 8.3395555   | 2.31318075  | 7.4373382   | 4.29364465  | 7.47731065  | 2.9338297   | 9.8948595   |
| "Slco1a4"  | 10.163577   | 10.600369   | 10.383075   | 9.707596    | 9.892458    | 10.204299   | 10.148638   | 10.354137   |
| "Slco1b2"  | 8.4079888   | 8.6323425   | 8.766273325 | 9.16903885  | 9.051328525 | 8.813316425 | 9.38924495  | 9.41161285  |
| "Slco2a1"  | 5.2257024   | 5.335154    | 6.294708667 | 5.5167149   | 5.413822433 | 5.169006733 | 5.831690673 | 5.5293385   |
| "Slco3a1"  | 2.757692467 | 2.633173467 | 2.956938433 | 2.7243202   | 2.807777567 | 2.5643781   | 2.678402267 | 2.651383133 |
| "Slco6b1"  | 2.4661705   | 2.449121    | 2.368323    | 2.4366975   | 2.4880228   | 2.4696376   | 2.4644554   | 2.4618647   |
| "Slco6c1"  | 3.0317852   | 3.0461357   | 2.8571017   | 2.9222393   | 3.0325677   | 3.0296822   | 3.0206406   | 3.0722558   |
| "Slfn2"    | 5.8447437   | 5.108422    | 6.633416    | 5.642499    | 5.1262097   | 5.123733    | 5.0096674   | 4.9742193   |
| "Slfn3"    | 2.71891435  | 2.6493298   | 2.64406045  | 2.5899415   | 2.6787213   | 2.6742869   | 2.65404875  | 2.66450695  |
| "Slfn4"    | 6.437982    | 2.3816438   | 7.047205    | 4.789256    | 2.3387103   | 2.589037    | 4.1380024   | 2.586503    |
| "Slfn8"    | 4.998622    | 4.377828    | 6.9915066   | 5.964401    | 4.688121    | 4.290741    | 5.1222444   | 4.416531    |
| "Slit2"    | 2.5066186   | 2.4785015   | 2.4016043   | 2.4478589   | 2.5054355   | 2.4998874   | 2.49294255  | 2.4910924   |
| "Slk"      | 6.293851825 | 6.1823032   | 6.11262705  | 5.9336137   | 5.837338075 | 5.82299045  | 6.28566825  | 5.658453675 |
| "Slmap"    | 6.088587067 | 6.034499833 | 5.745228833 | 5.841438867 | 6.0669124   | 6.035549133 | 5.726858267 | 6.017747233 |
| "Slmo2"    | 7.3541164   | 7.7285805   | 7.0943313   | 6.9875345   | 7.4747586   | 7.674253    | 6.83847     | 6.899382    |
| "Slpi"     | 8.571173    | 7.506787    | 8.703503    | 7.7938256   | 7.389735    | 7.1639323   | 6.5106645   | 6.049023    |
| "Sltn"     | 8.213369    | 8.104937    | 8.00514     | 7.808336    | 8.426291    | 8.615522    | 7.79881     | 8.553239    |
| "Slu7"     | 5.44484845  | 5.048537167 | 5.501718567 | 4.969182217 | 4.96425275  | 5.084941633 | 5.051772467 | 4.937572317 |
| "Slx1b"    | 2.5111093   | 2.6483097   | 2.48653     | 2.5407224   | 2.4805636   | 2.5921755   | 2.7490835   | 2.561553    |
| "Smad1"    | 7.6480925   | 6.71806465  | 7.60210365  | 7.4128223   | 6.9617582   | 7.09467235  | 7.2284      | 7.142899    |
| "Smad2"    | 6.3174744   | 6.359231    | 6.044293    | 6.226056    | 6.075181    | 6.037636    | 5.9184575   | 6.36871     |
| "Smad3"    | 2.6805916   | 2.6593344   | 2.5982745   | 2.6274123   | 2.730957    | 2.6984205   | 2.6677842   | 2.6717272   |
| "Smad4"    | 9.520603667 | 9.485500667 | 8.921059667 | 9.218104767 | 9.2878485   | 9.590747333 | 9.241478    | 9.490485333 |
| "Smad5"    | 3.5392913   | 4.260411    | 4.1100102   | 4.0542946   | 4.14062385  | 4.13022865  | 4.46893215  | 4.34408485  |
| "Smad6"    | 7.2568026   | 5.9640775   | 6.7731104   | 6.6657567   | 6.6664467   | 6.5885506   | 6.627935    | 6.5998287   |
| "Smad7"    | 6.293469    | 6.167079    | 6.012781    | 5.9777446   | 6.202947    | 6.075819    | 6.141656    | 6.2055187   |
| "Smagp"    | 8.1739435   | 8.160258    | 8.414127    | 8.535397    | 8.01037     | 8.374901    | 9.263971    | 8.353144    |
| "Smap1"    | 5.7543969   | 5.7515366   | 5.269871033 | 5.432774867 | 5.6547187   | 5.869583233 | 5.544758067 | 5.690764533 |
| "Smap2"    | 6.4291964   | 6.618298    | 6.553134    | 6.3838654   | 6.0812664   | 6.158641    | 6.414629    | 6.180126    |
| "Smarca1"  | 2.5145702   | 2.488286    | 2.4347413   | 2.4500918   | 2.522358    | 2.5306518   | 2.505046    | 2.5128055   |
| "Smarca2"  | 7.7905098   | 7.672006    | 7.8721545   | 8.64291965  | 7.8608525   | 8.2688985   | 8.0777045   | 8.5842416   |
| "Smarca4"  | 7.770128    | 7.6913545   | 8.260091    | 8.2074155   | 7.8853932   | 8.137021    | 8.4535785   | 7.81148915  |
| "Smarca5"  | 9.110547667 | 8.533798467 | 8.2135905   | 8.250273833 | 8.1676345   | 8.654660133 | 8.30591     | 8.376381467 |
| "Smarcad1" | 5.69985795  | 6.22934715  | 5.39218435  | 5.5789523   | 6.0337383   | 6.08845325  | 5.6510345   | 5.72957685  |
| "Smarcal1" | 5.4601526   | 5.361637    | 6.4345474   | 6.4061384   | 5.8486195   | 6.1242504   | 6.686411    | 6.0710607   |
| "Smarcb1"  | 6.33211685  | 6.5352726   | 6.9100184   | 6.7557393   | 6.5557585   | 6.7108045   | 6.70042705  | 6.74777985  |
| "Smarcc1"  | 5.84965635  | 6.64173415  | 6.48467425  | 6.11749965  | 6.24096755  | 6.28124735  | 6.337387    | 6.4102049   |
| "Smarcd1"  | 2.9715915   | 2.9378786   | 2.9091933   | 2.9229128   | 2.95782     | 2.9471703   | 2.9649856   | 2.9440498   |
| "Smarcd2"  | 6.497157033 | 7.081175867 | 6.845778    | 7.224735    | 7.121265733 | 7.213542967 | 6.996455667 | 7.017178167 |
| "Smarcd3"  | 2.6924157   | 2.7922115   | 2.7786827   | 2.6968071   | 2.6693578   | 2.6686454   | 2.6808982   | 2.6645453   |
| "Smarcel1" | 7.5835763   | 7.73228725  | 7.7817967   | 7.65308975  | 7.52101185  | 7.59815075  | 7.62692315  | 7.259704    |
| "Smc1a"    | 6.072850033 | 5.891639367 | 6.031575833 | 5.994069467 | 5.9411268   | 6.096270567 | 6.0844271   | 6.004129667 |
| "Smc1b"    | 3.1982124   | 3.1584852   | 3.1153755   | 3.1370797   | 2.8717175   | 3.1746917   | 3.2566178   | 3.168791    |
| "Smc2"     | 4.7465544   | 4.5372767   | 6.1174636   | 5.3407497   | 4.6310105   | 5.441306    | 6.5429645   | 5.018983    |
| "Smc3"     | 4.98891495  | 4.8095383   | 4.8352803   | 5.08114705  | 4.8575826   | 5.0754242   | 4.8282123   | 5.00777935  |
| "Smc4"     | 7.6239743   | 6.988205333 | 7.336749167 | 7.341994033 | 7.066648    | 7.345398467 | 7.414853233 | 7.363569467 |
| "Smc5"     | 7.6396513   | 6.92625975  | 6.64837835  | 6.8211592   | 6.58170565  | 7.500564    | 7.24910995  | 7.2697085   |
| "Smc6"     | 6.47660744  | 6.4349641   | 6.20171388  | 6.46210256  | 6.4815289   | 6.57885956  | 6.54745858  | 6.53801552  |
| "Smcp"     | 2.5134747   | 2.4830794   | 2.434032    | 2.4607782   | 2.5083227   | 2.5005803   | 2.5015488   | 2.494021    |
| "Smek1"    | 8.417219    | 7.9308176   | 7.8083434   | 7.747508    | 8.12619     | 8.34659     | 7.9401355   | 8.447433    |
| "Smek2"    | 7.92329325  | 7.58302345  | 7.4821599   | 7.72627175  | 7.88313385  | 8.1519925   | 7.784533925 | 8.0533261   |
| "Smg5"     | 6.0710077   | 6.467082    | 5.8024554   | 6.063563    | 6.661016    | 6.850416    | 6.274804    | 6.6465025   |
| "Smg6"     | 3.246902    | 3.2187908   | 3.3617167   | 3.1759489   | 3.2442086   | 3.2374232   | 3.235651    | 3.2330902   |
| "Smn1"     | 2.6186016   | 2.1022644   | 2.0705714   | 2.081552    | 2.120437    | 2.1163442   | 2.1250353   | 2.1070473   |
| "Smndc1"   | 8.6665155   | 7.5371355   | 7.6305708   | 7.7012678   | 7.42498535  | 7.7624097   | 7.8105175   | 7.5382215   |
| "Smo"      | 3.1650954   | 3.51384845  | 3.9449599   | 3.1153721   | 3.1450877   | 3.13070585  | 3.417927    | 3.19633905  |
| "Smoc1"    | 8.533126    | 9.4286375   | 8.872281    | 8.958061    | 9.644682    | 9.15966     | 8.617737    | 8.949564    |
| "Smoc2"    | 3.6839862   | 3.43257605  | 4.3184605   | 3.845914    | 3.8645514   | 3.45319485  | 3.8640562   | 3.833947    |
| "Smok3a"   | 2.8669183   | 2.839662    | 2.8127806   | 2.8063195   | 2.8543916   | 2.8556108   | 2.8392122   | 2.882441    |
| "Smox"     | 4.630319    | 4.2124934   | 4.4335747   | 4.654188    | 4.4744415   | 4.4637985   | 4.481179    | 4.4649467   |
| "Smpd1"    | 9.161207    | 8.574511    | 9.313125    | 9.08359     | 8.735212    | 9.314107    | 8.571807    | 8.956055    |
| "Smpd2"    | 8.120682    | 8.315729    | 8.850238    | 8.577331    | 8.253977    | 8.402584    | 7.6666284   | 8.127178    |

|            |             |             |             |             |             |             |             |             |
|------------|-------------|-------------|-------------|-------------|-------------|-------------|-------------|-------------|
| "Smpd3"    | 2.9781947   | 3.013339    | 2.965986    | 3.1243916   | 2.9850214   | 2.9629126   | 2.845387    | 2.9985383   |
| "Smpd4"    | 4.1678421   | 3.632991067 | 3.360687133 | 3.279809    | 3.600888867 | 3.6355628   | 3.604508533 | 3.469006    |
| "Smpd13a"  | 11.027156   | 10.458378   | 11.268786   | 10.917665   | 10.719378   | 10.573741   | 10.514172   | 10.44984    |
| "Smpd13b"  | 2.7300162   | 2.7018232   | 2.798753    | 2.6932583   | 2.7254968   | 2.722834    | 2.71734     | 2.7162414   |
| "Smpx"     | 2.537716    | 2.5100322   | 2.4533343   | 2.4709182   | 2.540428    | 2.5278444   | 2.5157347   | 2.5218048   |
| "Smr3a"    | 2.392064    | 2.3639188   | 2.2953238   | 2.3263428   | 2.3880072   | 2.3827326   | 2.3834226   | 2.3763812   |
| "Smtnl1"   | 2.460407    | 2.4267843   | 2.3422484   | 2.4033847   | 2.447275    | 2.439769    | 2.4493306   | 2.4317205   |
| "Smu1"     | 6.428681    | 6.631571533 | 6.428733867 | 6.357255567 | 6.563834833 | 6.467422467 | 6.545789333 | 6.705915733 |
| "Smyd1"    | 3.60012775  | 3.6826597   | 3.3592671   | 3.5163415   | 3.6723069   | 3.74076665  | 3.5344128   | 3.84862375  |
| "Smyd2"    | 7.5291386   | 8.680327    | 8.401961    | 8.529487    | 8.117609    | 7.8800917   | 7.919903    | 8.089603    |
| "Smyd5"    | 4.5981336   | 4.754627    | 4.6484685   | 4.588311    | 4.558483    | 4.5592365   | 4.5542903   | 4.5675325   |
| "Snai1"    | 2.4557433   | 2.4167833   | 2.397246    | 2.393828    | 2.4592113   | 2.430571    | 2.4454415   | 2.425107    |
| "Snai2"    | 4.736373    | 4.689825    | 4.8547063   | 5.3070335   | 4.6966352   | 4.704886    | 4.7086453   | 4.232021    |
| "Snap23"   | 7.149868433 | 6.444875967 | 7.0116599   | 6.7566593   | 6.510329567 | 6.649042    | 6.907133233 | 6.665325233 |
| "Snap25"   | 2.6890016   | 2.668644    | 2.6026065   | 2.6130393   | 2.693204    | 2.6904106   | 2.6654818   | 2.6844187   |
| "Snap29"   | 4.4150167   | 4.283380033 | 4.330294633 | 4.458665167 | 4.355643667 | 4.318064867 | 4.383407167 | 4.386977    |
| "Snap47"   | 9.25742885  | 9.7411125   | 10.1648465  | 10.298197   | 9.857679    | 9.37915205  | 9.982785    | 10.28401375 |
| "Snapc2"   | 6.20428625  | 6.1661537   | 6.26152175  | 6.161638    | 6.0095775   | 6.1789693   | 6.18861925  | 6.19268415  |
| "Snapc3"   | 3.318187167 | 3.729797133 | 3.637523633 | 3.695265767 | 4.091650367 | 3.883236967 | 3.8698205   | 3.9411614   |
| "Snapc5"   | 2.7117307   | 2.6839302   | 2.5606008   | 2.6480463   | 2.7171485   | 2.705181    | 2.7189846   | 2.8397446   |
| "Snapin"   | 6.0122618   | 6.30434755  | 5.9811509   | 6.270039    | 6.0801013   | 6.02052515  | 6.0752292   | 6.35003315  |
| "Snca"     | 5.432709633 | 5.259006167 | 4.302504833 | 5.7907485   | 5.304864467 | 5.190268433 | 5.023804233 | 3.856035567 |
| "Sncaip"   | 2.431303    | 2.43495575  | 2.3573806   | 2.3893175   | 2.4471599   | 2.44493795  | 2.49927125  | 2.70254245  |
| "Sncb"     | 2.6156664   | 2.5788162   | 2.5513818   | 2.6247432   | 2.607162    | 2.603879    | 2.4855216   | 2.6012297   |
| "Sncg"     | 3.1596863   | 3.1330192   | 3.0156188   | 3.0150633   | 3.1829834   | 3.166614    | 3.0617714   | 3.1948206   |
| "Snd1"     | 4.013025133 | 4.141553133 | 4.176892567 | 4.143799167 | 4.393774933 | 4.149156    | 4.1010513   | 4.208965267 |
| "Snf8"     | 7.3055086   | 8.036525    | 7.965852    | 8.173434    | 8.016548    | 7.7323866   | 8.176182    | 7.8994966   |
| "Snhg1"    | 8.2222199   | 7.8523264   | 6.3527979   | 6.99672196  | 7.2946957   | 8.33737126  | 6.927264    | 7.46770588  |
| "Snhg11"   | 3.785133    | 5.2090707   | 4.039868    | 5.238348    | 3.3607342   | 3.6066058   | 3.501303    | 3.7558897   |
| "Snhg5"    | 9.104589    | 9.616758    | 6.2549953   | 7.200064    | 7.3787837   | 8.566744    | 6.462889    | 6.9948077   |
| "Snhg6"    | 11.019046   | 10.750968   | 9.711894    | 9.977128    | 9.75624     | 11.077196   | 9.379578    | 9.720152    |
| "Snhg8"    | 10.121096   | 10.366188   | 9.448237    | 9.5691805   | 10.030261   | 10.171688   | 9.633711    | 9.768828    |
| "Snip1"    | 7.5115213   | 7.0206213   | 6.5760083   | 6.584439    | 7.1165824   | 7.223552    | 6.765141    | 7.034008    |
| "Snn"      | 2.3295822   | 2.2952483   | 2.282306    | 2.3588219   | 2.3037214   | 2.3055885   | 2.3035055   | 2.2809339   |
| "Snord116" | 3.0632942   | 3.0642407   | 3.1045396   | 2.9829283   | 3.1218781   | 3.172958    | 3.055828    | 3.1639576   |
| "Snrk"     | 8.7929015   | 8.79101     | 8.44480185  | 8.7883265   | 9.3568125   | 9.0027355   | 8.8425325   | 9.00075575  |
| "Snrrp25"  | 3.81121218  | 3.8625958   | 6.227103    | 5.132627    | 3.9982579   | 4.0034323   | 5.381442    | 4.6442175   |
| "Snrrp27"  | 8.8286178   | 8.9994765   | 9.107829    | 9.010466    | 8.66554135  | 9.1106425   | 8.9266475   | 8.750811    |
| "Snrrp40"  | 7.0984022   | 6.68565585  | 6.91562125  | 6.897677    | 6.57591845  | 6.5949037   | 6.82386975  | 6.5775875   |
| "Snrrp48"  | 6.575167575 | 6.132679525 | 5.675320875 | 6.2918442   | 6.17435185  | 6.5627685   | 6.29414475  | 6.22719255  |
| "Snrrp70"  | 7.6993556   | 7.9987783   | 8.079525    | 7.7027645   | 8.271088    | 8.331434    | 7.6685963   | 7.9334636   |
| "Snrpa1"   | 8.804779667 | 8.4003535   | 8.400685667 | 8.386485667 | 8.350902667 | 8.366698    | 8.2636199   | 8.297949733 |
| "Snrpb"    | 8.870973    | 8.785613    | 8.701491    | 8.5148115   | 8.730632    | 8.901206    | 8.523141    | 8.785563    |
| "Snrb2"    | 6.7843243   | 6.924737733 | 6.734235233 | 6.576642667 | 6.448192567 | 6.643530067 | 6.625968067 | 6.613683667 |
| "Snrpc"    | 8.449461    | 8.735286    | 8.838559    | 8.549528    | 8.485885    | 8.566921    | 8.715707    | 8.658443    |
| "Snrpd2"   | 10.027986   | 10.369343   | 10.534283   | 10.445919   | 10.229581   | 10.305972   | 10.534532   | 10.650589   |
| "Snrpd3"   | 7.79386785  | 8.13756285  | 8.20452785  | 7.9974613   | 8.198192    | 8.0930985   | 8.29770775  | 8.2610837   |
| "Snrpe"    | 11.181262   | 11.546877   | 11.234319   | 11.258937   | 11.207251   | 11.270745   | 11.290144   | 11.341074   |
| "Snrpg"    | 9.672215    | 9.4386415   | 9.75902775  | 9.521261    | 9.188964    | 9.177704    | 9.398835    | 9.565283    |
| "Snrpn"    | 4.6724292   | 5.100184475 | 5.361477    | 5.45797245  | 5.0362565   | 4.922216825 | 4.8055122   | 5.114860475 |
| "Snta1"    | 5.2007337   | 5.4130445   | 5.208227    | 5.126626    | 5.2979016   | 5.4258456   | 5.2131977   | 4.932981    |
| "Sntb1"    | 2.4568076   | 2.8331194   | 2.376372    | 2.3949504   | 2.4410233   | 2.4393425   | 2.441201    | 2.4255848   |
| "Sntb2"    | 3.29068175  | 2.938301525 | 3.091358525 | 3.056117475 | 3.074119675 | 3.064180925 | 3.131699575 | 3.0809206   |
| "Sntg2"    | 5.5750523   | 5.233218    | 4.620212    | 5.89182     | 4.1120634   | 4.67409     | 4.963876    | 5.8416233   |
| "Snw1"     | 8.2121265   | 7.966204    | 7.9007243   | 8.022296    | 7.99737875  | 8.147369    | 7.88210335  | 8.00268515  |
| "Snx1"     | 5.978842    | 6.0290866   | 6.568403    | 6.180039    | 5.78064     | 6.102261    | 6.274326    | 5.7876797   |
| "Snx10"    | 9.74793     | 9.617033    | 9.213612    | 9.194622    | 8.642292    | 8.985321    | 7.7569075   | 8.440017    |
| "Snx11"    | 2.2338324   | 2.3244956   | 2.3578486   | 2.3137457   | 2.3330371   | 2.3333957   | 2.0236838   | 2.327151    |
| "Snx12"    | 5.7163991   | 5.54356815  | 6.2571703   | 5.6317118   | 5.5368304   | 5.69430735  | 5.939538    | 5.716477    |
| "Snx14"    | 7.0010414   | 6.7947593   | 7.1916285   | 7.3516254   | 6.7642097   | 7.332266    | 7.6710186   | 7.474513    |
| "Snx15"    | 6.394736    | 6.139114    | 6.857924    | 6.6321      | 5.998001    | 6.637329    | 6.622948    | 6.3023515   |
| "Snx16"    | 6.2504616   | 5.5759835   | 5.0308366   | 5.3844047   | 5.708163    | 6.4001684   | 5.775795    | 5.525656    |
| "Snx17"    | 9.642194    | 9.617702    | 9.45659     | 9.350386    | 9.37785     | 9.311796    | 9.190695    | 9.161667    |
| "Snx18"    | 6.489498    | 5.3590045   | 5.89079605  | 6.0039316   | 5.6474309   | 5.893543    | 5.5023314   | 5.5985117   |
| "Snx19"    | 5.6136054   | 6.0170051   | 5.8836875   | 6.0521065   | 5.9569881   | 5.8933263   | 5.88204755  | 5.74739215  |
| "Snx2"     | 10.709771   | 10.188929   | 10.6922     | 10.458952   | 10.292068   | 10.433118   | 10.583117   | 10.569069   |
| "Snx21"    | 6.5388703   | 5.8251905   | 5.5145464   | 5.688341    | 5.5339985   | 5.5380116   | 5.108215    | 5.192898    |
| "Snx3"     | 10.643321   | 10.512204   | 10.86444    | 10.88554    | 10.482915   | 10.626138   | 10.77526    | 10.683814   |
| "Snx30"    | 4.0379367   | 3.9907894   | 3.7355788   | 3.9671843   | 4.391364    | 4.0144343   | 4.0814023   | 4.194023    |
| "Snx4"     | 7.8119726   | 8.376826    | 8.479539    | 8.418573    | 8.024905    | 8.006306    | 8.203392    | 8.236399    |
| "Snx5"     | 8.25210946  | 7.9505421   | 8.27096474  | 8.00872952  | 8.0397388   | 8.10601116  | 7.92590162  | 7.77992208  |
| "Snx6"     | 7.039969467 | 6.952740567 | 7.826624533 | 7.1408305   | 6.836446767 | 6.8259641   | 7.417424233 | 6.885119267 |
| "Snx9"     | 6.837332    | 7.5920383   | 7.5030588   | 7.6590898   | 7.34037805  | 6.9334905   | 7.38886325  | 7.1988932   |
| "Soat1"    | 5.89888675  | 4.294084525 | 5.7735131   | 5.286011575 | 5.012242725 | 4.955087325 | 5.21523155  | 4.585730125 |
| "Soat2"    | 5.6399736   | 5.458441    | 6.7232013   | 6.2540307   | 6.925231    | 6.8312497   | 7.0300097   | 7.135168    |
| "Socs2"    | 12.301066   | 11.2383415  | 10.249299   | 9.708657    | 9.4507375   | 10.7830125  | 8.2071605   | 10.01902275 |
| "Socs3"    | 8.852147667 | 5.390544767 | 8.082353433 | 7.0932514   | 5.236254533 | 5.9657931   | 6.7751649   | 7.7236072   |
| "Socs4"    | 3.61033035  | 3.39618705  | 3.15386315  | 3.3771448   | 3.4164313   | 3.4719065   | 3.49446635  | 3.5129589   |
| "Socs5"    | 4.2128872   | 4.38193955  | 5.678806    | 4.35578775  | 4.7520942   | 4.947973    | 5.0747975   | 4.596537    |
| "Socs6"    | 4.64931335  | 4.5074404   | 4.43434255  | 4.30450075  | 4.52690365  | 4.53127925  | 4.53101995  | 4.51912285  |
| "Sod1"     | 9.79848865  | 9.9667525   | 9.5494      | 9.7235215   | 9.8307278   | 9.77873935  | 9.6182775   | 9.808036    |

|            |             |             |             |             |             |             |             |             |
|------------|-------------|-------------|-------------|-------------|-------------|-------------|-------------|-------------|
| "Sod2"     | 9.376276233 | 9.026723    | 9.361672067 | 9.289084833 | 9.0649786   | 8.892659667 | 8.862808433 | 9.071843167 |
| "Sod3"     | 3.0695593   | 1.9328929   | 2.8325038   | 2.6369438   | 2.3754568   | 2.5528748   | 2.769507    | 2.333437    |
| "Solh"     | 5.823429233 | 5.740288833 | 5.6047731   | 5.2099096   | 5.582756167 | 5.659237133 | 5.5008362   | 5.137653733 |
| "Son"      | 6.72392145  | 6.478859667 | 6.1901606   | 6.270132283 | 6.3523196   | 6.4998605   | 6.521968633 | 6.339152517 |
| "Sorbs1"   | 7.00188185  | 7.5023474   | 7.8322095   | 8.4703152   | 7.85143125  | 7.4785075   | 8.400266    | 8.48743125  |
| "Sorbs3"   | 4.0615454   | 3.3410103   | 2.9055042   | 3.5668654   | 3.2737503   | 3.7959313   | 2.8263953   | 3.348677    |
| "Sorcs1"   | 2.3750474   | 2.4133685   | 2.2815015   | 2.3356812   | 2.3714237   | 2.3571866   | 2.3586624   | 2.3553777   |
| "Sorcs2"   | 2.4657087   | 2.5676923   | 2.5034223   | 2.5272682   | 2.679886    | 3.1703815   | 2.6653316   | 2.565528    |
| "Sorcs3"   | 2.3766294   | 2.347798    | 2.2986732   | 2.3395045   | 2.3724794   | 2.3634853   | 2.3707738   | 2.3576155   |
| "Sord"     | 11.5558055  | 11.4854075  | 11.639727   | 12.182125   | 12.110014   | 10.884933   | 12.336549   | 12.2024255  |
| "Sorl1"    | 3.39769035  | 3.03991315  | 4.02228735  | 3.47271735  | 3.40372265  | 3.25797415  | 3.4961879   | 3.28117435  |
| "Sort1"    | 4.108839333 | 4.2164445   | 4.5410768   | 4.1245931   | 4.334485367 | 4.393545167 | 4.248657167 | 4.3532779   |
| "Sos1"     | 3.6864604   | 4.089969167 | 3.1510318   | 3.5020047   | 3.805753933 | 3.871312533 | 3.584536567 | 3.7961049   |
| "Sos2"     | 8.279448    | 7.6705904   | 7.6823144   | 7.8330274   | 7.8134575   | 8.058197    | 8.268614    | 8.27455     |
| "Sost"     | 2.9078014   | 2.8900366   | 2.777272    | 2.8442535   | 2.9074316   | 2.922759    | 2.8623211   | 3.205323    |
| "Sostdcl1" | 2.378304    | 2.340602    | 2.297189    | 2.3201728   | 2.3591983   | 2.3546479   | 2.3579917   | 2.3503902   |
| "Sowaha"   | 3.082197    | 3.075095    | 2.8800526   | 2.953012    | 3.1132672   | 3.1119802   | 3.0035253   | 3.1548576   |
| "Sowahc"   | 7.5627966   | 6.9592333   | 8.195737    | 7.926902    | 7.3983464   | 7.7459683   | 8.162268    | 7.541965    |
| "Sox10"    | 2.7681265   | 2.7588717   | 2.7342131   | 2.73812555  | 2.7713804   | 2.7652452   | 2.74824355  | 2.7573227   |
| "Sox11"    | 2.5843742   | 2.5519943   | 2.4877992   | 2.489214    | 2.5705426   | 2.5759304   | 2.533761    | 2.5997384   |
| "Sox12"    | 3.4399338   | 3.8992147   | 3.262923    | 3.401465    | 3.4249017   | 3.4386172   | 3.3378172   | 3.428405    |
| "Sox13"    | 2.2933993   | 2.5109046   | 2.212051    | 2.237125    | 2.274591    | 2.2713094   | 2.2865407   | 2.2610822   |
| "Sox15"    | 3.3838649   | 3.273516    | 3.2158504   | 3.28171     | 3.3555298   | 3.4342833   | 3.1989849   | 3.3475883   |
| "Sox17"    | 3.67211295  | 3.42832995  | 3.6070914   | 3.6985842   | 3.6317459   | 4.1228157   | 4.1277218   | 3.8746644   |
| "Sox18"    | 4.540424    | 5.2573924   | 6.6456413   | 6.015522    | 5.9445176   | 6.0483346   | 6.648148    | 6.1793537   |
| "Sox2"     | 2.5659332   | 2.5457377   | 2.4368982   | 2.5068717   | 2.5757608   | 2.612902    | 2.553918    | 2.5713902   |
| "Sox3"     | 2.7468996   | 2.7262793   | 2.6808348   | 2.698918    | 2.744065    | 2.7718196   | 2.7049677   | 2.7377043   |
| "Sox4"     | 3.711256    | 2.98733315  | 4.03847715  | 4.73480445  | 3.74083735  | 3.40705925  | 4.5596186   | 4.1327035   |
| "Sox5"     | 4.63516045  | 4.65688175  | 4.48524425  | 4.685894    | 4.9363545   | 4.98633505  | 5.38304875  | 5.08123005  |
| "Sox6"     | 3.82503645  | 4.0597422   | 3.92475895  | 4.2164354   | 4.1323076   | 4.0292951   | 4.3316687   | 4.38935805  |
| "Sox7"     | 3.3341095   | 2.9981935   | 3.5108414   | 4.4394307   | 3.5384355   | 3.0323372   | 4.876484    | 3.5346737   |
| "Sox9"     | 4.8640281   | 3.3020077   | 3.3944236   | 3.07724155  | 3.30920745  | 3.19517195  | 2.98610595  | 3.1335206   |
| "Sp1"      | 5.7418187   | 5.4498552   | 5.483538    | 5.6201742   | 5.4582239   | 5.6897744   | 5.73646295  | 5.53041365  |
| "Sp100"    | 4.0020523   | 3.634082    | 4.245063    | 4.012675    | 3.8062959   | 3.9350727   | 4.036721    | 3.8974597   |
| "Sp2"      | 3.3751252   | 2.8774054   | 2.803342    | 2.8377001   | 2.9021256   | 2.9215639   | 2.9010603   | 2.6969497   |
| "Sp3"      | 9.08168     | 8.7132435   | 8.616298    | 8.77392     | 8.9306755   | 8.846558    | 9.338919    | 9.022086    |
| "Sp4"      | 3.0505343   | 3.10543235  | 3.1796824   | 3.41903195  | 3.1743625   | 3.13121485  | 3.16599895  | 3.18767985  |
| "Sp5"      | 2.2375693   | 2.2571797   | 2.2130966   | 2.2326703   | 2.407619    | 2.2500606   | 2.4452977   | 2.2852197   |
| "Sp7"      | 3.054613    | 3.0474885   | 2.8884492   | 3.0237598   | 3.229054    | 2.674167    | 3.011348    | 3.1166008   |
| "Spa17"    | 2.6538548   | 2.6167326   | 2.6847062   | 2.5718803   | 2.7113523   | 2.6385632   | 2.6434631   | 2.6165833   |
| "Spag1"    | 2.636839    | 2.6464827   | 2.572625    | 2.597542    | 2.6661878   | 2.6900766   | 2.6385128   | 2.6341126   |
| "Spag5"    | 2.527579233 | 2.5060504   | 2.445002467 | 2.461846767 | 2.5197564   | 2.5120075   | 2.5113175   | 2.505999933 |
| "Spag7"    | 8.670432    | 8.616225    | 8.746438    | 8.584601    | 7.85415     | 8.32706     | 8.632693    | 8.568946    |
| "Spam1"    | 2.4935272   | 2.4619722   | 2.3879967   | 2.4308157   | 2.4866745   | 2.5222688   | 2.483788    | 2.4828143   |
| "Sparc"    | 8.903054    | 7.8766085   | 9.4704065   | 8.8726705   | 8.0811893   | 8.5276115   | 9.0762025   | 8.5079495   |
| "Sparcl1"  | 5.709737    | 5.058236    | 6.0187488   | 6.14611     | 6.4705443   | 6.190121    | 6.423041    | 5.796464    |
| "Spast"    | 7.49507685  | 7.5459913   | 7.07960125  | 7.5603986   | 7.54147985  | 7.7351842   | 7.853037    | 7.85382085  |
| "Spata13"  | 7.5509624   | 6.6387978   | 7.78348     | 7.5940185   | 7.055079    | 7.266957    | 7.643983    | 7.586813    |
| "Spata19"  | 2.4285076   | 2.405375    | 2.3419225   | 2.3745685   | 2.4253933   | 2.4203572   | 2.4026973   | 2.433235    |
| "Spata4"   | 2.628222    | 2.6017299   | 2.5324306   | 2.565319    | 2.636093    | 2.6388683   | 2.6101823   | 2.6304522   |
| "Spata5"   | 5.633547333 | 5.225473433 | 5.0297751   | 4.7127242   | 5.025388633 | 5.421318533 | 4.803895767 | 4.737296567 |
| "Spata6"   | 2.8282609   | 2.6358421   | 2.57846775  | 2.62294115  | 2.7654113   | 2.66454255  | 2.6803978   | 2.6464106   |
| "Spats2"   | 6.565206    | 5.895714    | 5.990296    | 5.836491    | 5.889181    | 5.881277    | 5.859696    | 5.8534894   |
| "Spats21"  | 3.224113    | 3.4758148   | 3.764732    | 3.5301712   | 3.5032904   | 3.511129    | 3.4336662   | 3.4900243   |
| "Spc25"    | 3.1240056   | 2.70702395  | 3.11698605  | 3.03608595  | 3.7381622   | 3.41341825  | 4.15158315  | 4.3334375   |
| "Spcs1"    | 8.154516    | 8.232517    | 8.249713667 | 8.302191133 | 8.221715333 | 8.314843467 | 8.2467449   | 8.208153    |
| "Spcs2"    | 9.6909015   | 10.3038675  | 10.4272485  | 9.8668385   | 10.4838625  | 10.144127   | 9.982494    | 10.11169    |
| "Spcs3"    | 8.340869    | 9.058509    | 9.733694    | 9.600332    | 9.456375    | 9.04057     | 9.571405    | 9.77448     |
| "Spdef"    | 2.491786    | 2.4578063   | 2.41362     | 2.4040852   | 2.4760773   | 2.4677413   | 2.4643514   | 2.4617999   |
| "Speccl1"  | 3.8237422   | 3.8041549   | 3.7262597   | 3.7501092   | 3.7914178   | 3.7939947   | 3.7780209   | 3.6987696   |
| "Speer3"   | 5.02406     | 4.653808    | 4.486447    | 4.821001    | 5.0163274   | 4.7685566   | 4.5738482   | 4.8207827   |
| "Speer4a"  | 2.4938765   | 2.5244389   | 2.3883      | 2.4188108   | 2.497656    | 2.5146317   | 2.4847133   | 2.488037    |
| "Speg"     | 2.994745733 | 2.9500455   | 2.815632933 | 2.880011167 | 3.010328267 | 3.004947333 | 2.9304973   | 2.992562367 |
| "Spen"     | 4.6047134   | 4.572225    | 4.571434    | 4.5514345   | 4.6306314   | 4.5875177   | 4.5146656   | 4.58075     |
| "Spert"    | 2.5974274   | 2.5579176   | 2.539218    | 2.5517507   | 2.5803447   | 2.572806    | 2.5594704   | 2.566727    |
| "Spespl1"  | 2.5072882   | 2.4755962   | 2.3934793   | 2.4529564   | 2.5021412   | 2.499249    | 2.491214    | 2.4912603   |
| "Spg20"    | 6.441824367 | 6.784595633 | 6.6477992   | 6.231900167 | 6.764151233 | 7.148823333 | 7.076328333 | 6.698734    |
| "Spg21"    | 8.6227865   | 8.08969     | 8.369451    | 8.204244    | 7.849272    | 7.7667236   | 8.025335    | 8.114039    |
| "Spg7"     | 6.2521567   | 6.30284     | 6.5624094   | 6.288666    | 6.300996    | 6.220836    | 6.321516    | 6.3129582   |
| "Sphk2"    | 4.0723724   | 4.4375017   | 4.1465632   | 4.22122125  | 4.23944715  | 4.55021135  | 4.4918004   | 4.1302465   |
| "Spi16"    | 2.4574337   | 2.4375255   | 2.3521352   | 2.4224615   | 2.4571757   | 2.4468074   | 2.4406953   | 2.4429736   |
| "Spib"     | 2.4006424   | 2.3767285   | 2.34416     | 2.6996617   | 2.397334    | 2.3943667   | 2.4093497   | 2.3822577   |
| "Spic"     | 5.5078325   | 5.13358905  | 7.48053785  | 6.6110175   | 5.5765923   | 5.66086135  | 5.8990691   | 5.55440485  |
| "Spice1"   | 4.3908878   | 4.2036405   | 4.6251562   | 4.490546    | 4.19864295  | 4.6807325   | 4.96839365  | 4.647118    |
| "Spin1"    | 9.718205    | 9.6291172   | 8.41182725  | 8.526788325 | 8.7382555   | 9.870651375 | 8.569838375 | 8.94906925  |
| "Spin4"    | 2.7834425   | 2.7511966   | 3.2522855   | 2.718476    | 2.3706965   | 2.7777908   | 2.8925452   | 2.395468    |
| "Spink3"   | 2.8276284   | 2.793848    | 5.226466    | 2.8741364   | 2.569016    | 3.0686662   | 2.6025534   | 2.7988474   |
| "Spink4"   | 2.4371367   | 2.389577    | 2.3385181   | 2.3694055   | 2.7522883   | 2.455927    | 2.4073925   | 2.407207    |
| "Spint2"   | 9.4167545   | 9.618923    | 9.6508165   | 9.896748    | 9.2535335   | 9.4301885   | 9.306782    | 9.7539705   |
| "Spna1"    | 2.4277985   | 2.4065158   | 2.317377    | 2.3705862   | 2.4258733   | 2.4166794   | 2.4292974   | 2.4111853   |
| "Spna2"    | 8.90899425  | 8.77943565  | 8.72852965  | 8.789348    | 8.6777302   | 8.635056    | 8.6805895   | 8.62792335  |

|              |             |             |             |             |             |             |             |             |
|--------------|-------------|-------------|-------------|-------------|-------------|-------------|-------------|-------------|
| "Spnb1"      | 2.964548    | 2.6971488   | 2.6520205   | 2.66171     | 2.75913     | 2.7083135   | 2.7131593   | 2.6094208   |
| "Spnb2"      | 7.0325664   | 6.645078    | 6.60683735  | 6.569496175 | 6.670089625 | 6.661173575 | 6.547679125 | 6.398633825 |
| "Spnb3"      | 5.1176844   | 6.094843    | 5.8271813   | 7.219465    | 7.1758738   | 6.865306    | 7.2170887   | 7.5940633   |
| "Spns1"      | 4.108998    | 4.0768695   | 4.032028    | 4.063247    | 4.0806146   | 4.1824656   | 4.070731    | 4.080617    |
| "Spns2"      | 5.245611    | 6.8410654   | 6.6494136   | 7.158389    | 6.1760373   | 6.191827    | 6.5575733   | 6.308447    |
| "Spock3"     | 3.0128121   | 3.0270336   | 2.948749    | 2.8961287   | 3.1104064   | 3.060418    | 2.9558837   | 3.1348257   |
| "Spon1"      | 4.5161943   | 4.29769585  | 3.7258476   | 3.5653486   | 4.26951385  | 4.43724205  | 3.2668772   | 3.18351915  |
| "Spon2"      | 2.747035    | 2.5632343   | 2.7537827   | 2.7007532   | 2.775602    | 2.7621026   | 3.2896607   | 2.996212    |
| "Spop"       | 9.751594    | 9.7755955   | 9.6926735   | 9.629427    | 9.957532    | 9.8209915   | 9.6294345   | 9.569601    |
| "Spp1"       | 8.755606    | 8.446663    | 8.979391    | 9.638436    | 8.564476    | 7.49633     | 9.529111    | 9.498686    |
| "Spp2"       | 10.973286   | 11.544729   | 11.809767   | 12.466024   | 12.18612    | 11.115313   | 12.184199   | 11.768078   |
| "Sppi3"      | 5.370011    | 5.36805425  | 5.3129051   | 5.4203618   | 5.3856415   | 5.64938665  | 5.18696285  | 5.421714    |
| "Spr"        | 8.743949    | 9.00605     | 9.328632    | 8.795528    | 8.860278    | 8.848674    | 8.705502    | 8.929069    |
| "Spred1"     | 5.527156333 | 4.150061567 | 5.614879367 | 5.272733867 | 4.975414733 | 4.954350333 | 5.7297602   | 5.258946233 |
| "Spred2"     | 7.27185     | 6.5338326   | 6.6693635   | 6.849908    | 6.5453386   | 6.6940613   | 6.710586    | 6.6785855   |
| "Sprra1a"    | 2.6648507   | 2.6338434   | 2.50981     | 2.6025028   | 2.6861959   | 2.6485362   | 2.6543775   | 2.6913164   |
| "Sprrr1b"    | 2.438898    | 2.4087086   | 2.3352897   | 2.3754318   | 2.4370193   | 2.4637702   | 2.3902411   | 2.4662695   |
| "Sprrr2a1"   | 2.412306    | 2.4926805   | 2.3303366   | 2.3689075   | 2.3767672   | 2.4147701   | 2.417607    | 2.4079335   |
| "Sprrr2e"    | 2.451994    | 2.4196646   | 2.3828585   | 2.4025404   | 2.44608     | 2.4359977   | 2.443107    | 2.430371    |
| "Sprrr2f"    | 2.6551728   | 2.6408865   | 2.5490508   | 2.5507557   | 2.6558924   | 2.6520674   | 2.629291    | 2.6564496   |
| "Sprrr2j-ps" | 2.7989817   | 2.7799625   | 2.6555      | 2.7077024   | 2.8179877   | 2.806737    | 2.7658985   | 2.8147938   |
| "Sprrr2k"    | 2.7221198   | 2.6920965   | 2.591502    | 2.6605277   | 2.8095455   | 2.7301435   | 2.713307    | 2.726361    |
| "Sprrr3"     | 2.4679563   | 2.4350514   | 2.3557363   | 2.4114451   | 2.4561648   | 2.4568417   | 2.450635    | 2.4396815   |
| "Sprry1"     | 4.9825478   | 2.6370468   | 3.6302543   | 2.7754066   | 2.8740025   | 2.9612603   | 3.053809    | 2.7493572   |
| "Sprry2"     | 3.51967765  | 3.2722808   | 3.8441361   | 3.37513625  | 3.2377094   | 3.04783     | 3.575292    | 3.5516976   |
| "Sprry4"     | 2.3779538   | 2.2715957   | 2.2297335   | 2.2340364   | 2.3068678   | 2.287384    | 2.2983954   | 2.278111    |
| "Sprryd3"    | 3.0702815   | 2.659742    | 2.9499679   | 2.64462     | 2.6644688   | 2.6691332   | 2.6721528   | 2.6563168   |
| "Sprryd4"    | 7.2111464   | 7.680705    | 7.464661    | 6.9466      | 7.289131    | 7.4032345   | 6.843247    | 7.033286    |
| "Spsb1"      | 2.572018133 | 2.333301    | 2.336722667 | 2.3122001   | 2.384123133 | 2.346063133 | 2.355712367 | 2.4540471   |
| "Spsb2"      | 5.3174672   | 5.08052645  | 5.22563345  | 5.0595525   | 5.0722935   | 5.1942292   | 4.90891525  | 5.11877585  |
| "Spsb3"      | 5.937478    | 6.1308656   | 5.737884    | 5.4107428   | 5.313057    | 6.4059134   | 5.5950418   | 5.2665234   |
| "Spsb4"      | 2.9566521   | 2.9853252   | 2.9430814   | 3.7746073   | 3.1569215   | 3.5961936   | 3.43881075  | 3.44991545  |
| "Spt1"       | 2.8986306   | 2.901622    | 2.8155003   | 2.852438    | 2.9435344   | 2.933902    | 2.8623147   | 2.945434    |
| "Sptlc1"     | 5.8895748   | 5.6618968   | 6.027903333 | 6.077237733 | 6.094957833 | 6.1764364   | 6.177986067 | 6.107344467 |
| "Sptlc2"     | 7.86874     | 7.3861985   | 8.476763    | 7.6058173   | 7.2624454   | 7.3900275   | 7.490766    | 7.4475083   |
| "Spz1"       | 2.5496795   | 2.5229175   | 2.4544728   | 2.4740734   | 2.5521722   | 2.5470362   | 2.5343258   | 2.539481    |
| "Sqle"       | 10.527993   | 9.383527    | 10.874337   | 9.661626    | 6.503253    | 4.406794    | 7.6684923   | 9.201856    |
| "Sqrdl"      | 11.027972   | 10.743016   | 11.983317   | 11.870114   | 11.325529   | 10.6227     | 11.727466   | 11.870282   |
| "Sqstml1"    | 10.362223   | 10.2390175  | 10.342138   | 10.190275   | 10.043882   | 10.347508   | 9.596921    | 9.554458    |
| "Sra1"       | 10.084937   | 8.973721    | 9.903678    | 9.846995    | 9.936775    | 9.713127    | 9.523936    | 9.944911    |
| "Src"        | 3.2243905   | 3.1859381   | 3.0987859   | 3.1789913   | 3.7317607   | 3.1884441   | 3.2103672   | 3.6921737   |
| "Srcap"      | 2.8178947   | 2.7963376   | 2.6956725   | 2.7242632   | 2.7597451   | 2.893649    | 2.6458256   | 3.8553054   |
| "Srcin1"     | 2.597894    | 2.567408    | 2.47439     | 2.5158868   | 2.59682     | 2.5940983   | 2.5765207   | 2.5921576   |
| "Srd5a2"     | 3.044946    | 2.9595056   | 3.989871    | 3.1925604   | 2.9978902   | 2.9891045   | 3.485625    | 2.9901733   |
| "Srd5a3"     | 5.9230022   | 6.07514765  | 6.779963575 | 6.154702375 | 5.73630975  | 6.0634004   | 6.025353    | 6.179233075 |
| "Sreb1"      | 8.627753    | 8.045313    | 10.489935   | 9.687003    | 9.202689    | 7.1927786   | 10.847293   | 10.913387   |
| "Sreb2"      | 4.898752    | 4.5999519   | 5.1705558   | 4.58275425  | 4.06358195  | 4.10252735  | 4.23036265  | 3.94778935  |
| "Srek1"      | 7.562205367 | 6.967277167 | 7.229381233 | 7.028759767 | 7.299069633 | 7.453443833 | 7.305965167 | 7.4584201   |
| "Srek1ip1"   | 4.972565    | 5.4953957   | 5.9298353   | 5.419856    | 5.454212    | 5.49026     | 5.9507737   | 5.801307    |
| "Srf"        | 4.1332086   | 3.5305429   | 3.5443435   | 3.4724551   | 3.506009    | 3.75888525  | 3.53639125  | 3.46042535  |
| "Srfb1p1"    | 4.255394    | 4.2182265   | 3.39863845  | 3.52207135  | 3.7491755   | 3.94536495  | 3.6158357   | 3.562553    |
| "Srgap1"     | 2.4206395   | 2.3902      | 2.3243086   | 2.3548892   | 2.4146414   | 2.4137425   | 2.407515    | 2.402866    |
| "Srgap2"     | 5.6863284   | 5.7536335   | 6.440863    | 6.5000143   | 5.7725716   | 5.513402    | 5.9382367   | 6.090363    |
| "Srgn"       | 11.75205    | 10.03293    | 10.399932   | 9.997147    | 10.2386055  | 9.907393    | 9.952325    | 9.485308    |
| "Sri"        | 6.9245162   | 6.93245785  | 7.6588225   | 7.39799035  | 6.78659245  | 6.53292065  | 7.47426565  | 7.406592    |
| "Srm"        | 7.3760586   | 7.8583684   | 7.089173    | 7.227978    | 8.061528    | 7.7616105   | 6.6005086   | 7.5450745   |
| "Srms"       | 3.061413    | 3.055212    | 3.0103784   | 3.0357265   | 3.1037822   | 3.0923584   | 3.080976    | 3.0723097   |
| "Srp19"      | 9.649161    | 9.831857    | 10.008314   | 9.617311    | 9.669236    | 9.410528    | 9.425188    | 9.344841    |
| "Srp54a"     | 7.869443733 | 8.040714833 | 8.506633    | 7.847422    | 8.180432333 | 7.873841433 | 7.875957433 | 7.795019833 |
| "Srp68"      | 7.307537    | 7.4455156   | 7.3808923   | 7.3847756   | 7.7971354   | 7.3356338   | 7.1104336   | 7.4655156   |
| "Srp9"       | 10.2712645  | 10.50576    | 10.548848   | 10.3234905  | 10.653389   | 10.2210415  | 10.244726   | 10.29052875 |
| "Srp1k1"     | 6.4957294   | 5.6078043   | 6.358486    | 5.9038243   | 5.899773    | 6.1126103   | 5.784132    | 6.2982006   |
| "Srp1k2"     | 6.302275625 | 6.1194698   | 6.27194225  | 6.61332925  | 5.975314175 | 6.154912    | 6.50685305  | 6.3929855   |
| "Srp1k3"     | 2.44874415  | 2.42025115  | 2.36029795  | 2.37883     | 2.50755085  | 2.437454    | 2.4283879   | 2.451847    |
| "Srp1r"      | 6.14780315  | 6.1796644   | 5.87260935  | 5.8092755   | 6.176236    | 5.9768755   | 5.7504109   | 5.86536465  |
| "Srp1rb"     | 7.0450882   | 7.2075552   | 7.1299404   | 6.9379411   | 7.134416425 | 7.060700225 | 7.031967575 | 6.984556425 |
| "Srp1x2"     | 2.5206873   | 2.6645455   | 3.322245    | 3.471665    | 3.0153363   | 2.828425    | 3.0418007   | 2.990256    |
| "Srr"        | 6.18529825  | 6.6443092   | 6.7289421   | 6.8577644   | 6.737198275 | 6.648925625 | 6.993377075 | 6.6859692   |
| "Srrd"       | 8.057506    | 6.9178486   | 6.5163918   | 6.7866883   | 6.2461586   | 6.5766354   | 6.16079     | 6.259642    |
| "Srrm1"      | 7.3101161   | 6.668226125 | 6.5574344   | 6.4527284   | 6.679530625 | 6.529359275 | 6.40884465  | 6.51154305  |
| "Srrm2"      | 6.630172    | 6.5392075   | 6.421843    | 6.6603293   | 6.6011963   | 6.76667     | 6.739544    | 6.873956    |
| "Srrm4"      | 3.3576581   | 2.72864     | 2.1978576   | 2.2216718   | 2.2618368   | 2.2530205   | 2.2697248   | 2.2461243   |
| "Srrt"       | 5.7226334   | 5.22888     | 6.284786    | 5.4238405   | 5.9893146   | 5.9702125   | 6.0460052   | 5.9652267   |
| "Srsf1"      | 8.696882983 | 8.902648667 | 8.88589975  | 8.62063215  | 9.0174245   | 9.197251333 | 9.064709667 | 8.8602385   |
| "Srsf10"     | 7.02461325  | 7.08262755  | 6.71999325  | 6.382768175 | 6.7841981   | 7.2227839   | 7.0461476   | 6.77674865  |
| "Srsf11"     | 9.483772    | 9.24204325  | 8.953223    | 9.0346765   | 9.367431    | 9.1196735   | 9.057413    | 9.174153    |
| "Srsf2"      | 6.84232575  | 7.5435539   | 7.153170575 | 6.78243805  | 7.620214175 | 6.9941773   | 7.016610375 | 7.321886675 |
| "Srsf3"      | 7.028725067 | 7.462969567 | 7.365496017 | 6.60412075  | 7.192342133 | 6.417107533 | 6.9749447   | 6.182152867 |
| "Srsf4"      | 8.66504     | 8.530493    | 8.169961    | 8.563306    | 8.5410385   | 8.246296    | 8.374705    | 8.732283    |
| "Srsf5"      | 12.165273   | 11.480997   | 11.621226   | 11.693096   | 11.347431   | 11.64766    | 11.557935   | 11.772234   |
| "Srsf6"      | 9.732850667 | 9.644048833 | 9.167007    | 9.283926    | 9.998748667 | 10.05471733 | 9.6337225   | 9.811742333 |

|              |             |             |             |             |             |             |             |             |
|--------------|-------------|-------------|-------------|-------------|-------------|-------------|-------------|-------------|
| "Srsf7"      | 7.952448667 | 7.427567833 | 7.424098733 | 7.264262467 | 7.351242433 | 7.431237667 | 7.5308979   | 7.429728133 |
| "Srsf9"      | 8.423099    | 8.785226    | 8.880628    | 8.685268    | 8.591318    | 8.873393    | 8.906035    | 8.930243    |
| "Srst"       | 2.6284206   | 2.6072953   | 2.554542    | 2.5487413   | 2.6296463   | 2.6265664   | 2.609449    | 2.614091    |
| "Srxn1"      | 5.9637741   | 5.50180475  | 7.159637975 | 5.187618775 | 4.581850025 | 4.3534682   | 4.326392925 | 4.054838475 |
| "Sry"        | 2.62297685  | 2.6424065   | 2.50897015  | 2.5455028   | 2.62213335  | 2.61396415  | 2.5574568   | 2.5982081   |
| "Ss18"       | 7.13263285  | 7.3857295   | 7.249411    | 7.4751302   | 7.27488825  | 7.257268    | 7.1934185   | 7.2635868   |
| "Ssb"        | 8.43183825  | 8.01126275  | 8.044224075 | 7.69837625  | 7.80025555  | 7.69016185  | 8.170294875 | 7.80348395  |
| "Ssbp1"      | 7.3311612   | 7.6377389   | 7.619900267 | 7.606278233 | 7.6685801   | 7.778254067 | 7.818240433 | 7.7949399   |
| "Ssbp2"      | 3.7310297   | 4.122678    | 3.8852153   | 3.3559873   | 3.4046211   | 3.4608004   | 3.465991    | 2.9948313   |
| "Ssbp3"      | 4.2812133   | 4.5125147   | 4.33158435  | 4.44917915  | 4.4031266   | 4.2686471   | 4.45761315  | 4.35660435  |
| "Ssbp4"      | 3.2624288   | 3.1934943   | 3.5219095   | 3.9614072   | 3.2014952   | 3.1908972   | 3.1999538   | 3.2006185   |
| "Ssfa2"      | 8.830136    | 8.350882    | 8.629644    | 8.7966175   | 9.16383     | 8.842736    | 8.891171    | 8.899184    |
| "Ssna1"      | 7.419607    | 7.36998     | 7.5419827   | 7.4948134   | 7.4629703   | 7.4695215   | 7.472648    | 7.4534025   |
| "Sspn"       | 3.50035955  | 3.57786235  | 3.5315898   | 3.46524015  | 3.52386265  | 3.5236846   | 3.5488594   | 3.51442105  |
| "Ssr1"       | 6.575665567 | 6.974887767 | 7.904855467 | 7.1405018   | 7.230883967 | 6.634804267 | 7.195020567 | 7.224639733 |
| "Ssr2"       | 7.5823064   | 7.9989142   | 8.257519    | 7.8908634   | 8.133009    | 7.8855      | 8.048817    | 7.8342466   |
| "Ssr3"       | 10.944931   | 11.316084   | 11.337363   | 11.189884   | 11.747165   | 11.052828   | 11.185605   | 11.273619   |
| "Ssr4"       | 7.8841977   | 8.1836005   | 8.04166     | 7.9574465   | 8.1351348   | 8.0085327   | 7.878521    | 8.3891935   |
| "Ssrp1"      | 9.05883     | 8.984317667 | 9.109244    | 8.844664333 | 8.838553667 | 9.039814667 | 8.802623667 | 8.999779333 |
| "Sssca1"     | 6.46930185  | 6.8851732   | 6.547829    | 6.1593715   | 6.3025229   | 6.57897415  | 6.2116325   | 6.08958245  |
| "Sstr2"      | 3.1833045   | 2.4715452   | 2.4352455   | 2.4254775   | 2.4877617   | 2.4949408   | 2.4859421   | 2.549393    |
| "Sstr5"      | 2.5200653   | 2.491178    | 2.4591136   | 2.4631953   | 2.51758     | 2.5019522   | 2.511644    | 2.509838    |
| "Ssu72"      | 9.352234    | 9.896984    | 9.532477    | 9.516481    | 9.681795    | 9.766401    | 9.4002905   | 9.618255    |
| "Ssx2ip"     | 3.667740725 | 3.43374105  | 3.24787165  | 3.22229045  | 3.373717025 | 3.407096275 | 3.414337975 | 3.3856637   |
| "Ssxb1"      | 2.4422207   | 2.407554    | 2.3593054   | 2.373138    | 2.4367802   | 2.438416    | 2.417135    | 2.424926    |
| "St13"       | 9.497364    | 9.204698    | 9.421317    | 9.154106    | 9.009754    | 9.694252    | 9.279624    | 9.329221    |
| "St3gal1"    | 8.46126     | 7.2394643   | 8.218688    | 7.423371    | 7.2401557   | 7.65905     | 7.6311502   | 7.4619036   |
| "St3gal2"    | 2.790373467 | 2.6070696   | 2.782047967 | 2.694134033 | 2.658850433 | 2.681542533 | 2.684640067 | 2.5510926   |
| "St3gal3"    | 5.3635561   | 5.34069965  | 5.257328    | 5.5783495   | 5.30203175  | 5.5491939   | 5.33208     | 5.6436357   |
| "St3gal4"    | 8.034156    | 8.622375    | 8.687774    | 8.571096    | 8.401414    | 7.7610455   | 8.093152    | 8.16743     |
| "St3gal5"    | 10.717816   | 11.7629275  | 9.022336    | 9.260887    | 11.204407   | 11.4346065  | 9.459434    | 8.904122    |
| "St3gal6"    | 5.349318    | 4.25383885  | 4.4820142   | 4.07270135  | 5.056341    | 3.52054705  | 5.39978315  | 3.7849089   |
| "St5"        | 9.496225    | 6.726829    | 6.922235    | 5.3321595   | 5.9386454   | 6.944001    | 6.6022296   | 5.013174    |
| "St6gal1"    | 11.201622   | 9.376237    | 11.952737   | 11.480544   | 10.610669   | 9.469374    | 10.651991   | 10.741924   |
| "St6galnac1" | 2.9113653   | 2.8718426   | 2.7686346   | 2.8274574   | 2.902838    | 2.9000175   | 2.8477771   | 2.9006119   |
| "St6galnac2" | 2.447013    | 2.4225264   | 2.5516796   | 2.398129    | 2.4432302   | 2.4376106   | 2.4373446   | 2.430187    |
| "St6galnac3" | 2.7962482   | 2.7741103   | 2.6953065   | 2.7301416   | 2.795263    | 2.877936    | 2.8432903   | 2.788813    |
| "St6galnac4" | 2.3940498   | 2.36626455  | 2.4826075   | 2.41054045  | 3.2431371   | 2.356892    | 2.38929155  | 2.39098185  |
| "St6galnac5" | 2.4118536   | 2.3838456   | 2.317612    | 2.3482811   | 2.4081376   | 2.402762    | 2.3992155   | 2.3986576   |
| "St6galnac6" | 7.2084174   | 7.8543477   | 7.318121    | 8.253737    | 7.6978965   | 7.7809815   | 7.904791    | 7.283459    |
| "St7"        | 5.3301654   | 5.4891405   | 5.045589    | 5.2617826   | 5.312003    | 5.30828     | 5.277014    | 5.475819    |
| "St7l"       | 7.7509074   | 7.9380655   | 7.3796554   | 7.3381095   | 8.084603    | 8.477994    | 7.716666    | 7.974442    |
| "St8sia1"    | 2.761053    | 2.729256    | 2.6415577   | 2.7083375   | 2.7750888   | 2.7492032   | 2.710578    | 2.743315    |
| "St8sia2"    | 2.4044108   | 2.373238    | 2.3313928   | 2.355588    | 2.3933372   | 2.3939004   | 2.392447    | 2.3737707   |
| "St8sia3"    | 2.4896064   | 2.4609184   | 2.4216561   | 2.4416738   | 2.4876828   | 2.4781306   | 2.4792554   | 2.4879277   |
| "St8sia4"    | 3.4239794   | 3.30142405  | 4.56398665  | 4.2558294   | 3.6592835   | 3.68009115  | 4.20399625  | 3.7466283   |
| "Stab1"      | 7.9070854   | 6.636024    | 7.3754      | 7.360918    | 7.307962    | 7.4897847   | 7.5303235   | 6.837882    |
| "Stab2"      | 9.629002    | 9.054052    | 9.472827    | 9.197632    | 8.945878    | 9.180925    | 9.219805    | 8.88885     |
| "Stac"       | 2.5112498   | 2.4840238   | 2.3938122   | 2.4683661   | 2.5029333   | 2.5539246   | 2.4905212   | 2.5151484   |
| "Stag1"      | 4.76144275  | 4.90955875  | 4.530604875 | 4.554838575 | 4.6918725   | 4.718441575 | 4.980121675 | 4.7015345   |
| "Stag2"      | 8.119388    | 8.038563    | 7.9080123   | 7.9439385   | 8.00137835  | 8.3899055   | 8.245629    | 8.4392952   |
| "Stam"       | 6.7721867   | 6.0131125   | 6.18716225  | 6.26844715  | 6.07158665  | 6.7429872   | 6.8270243   | 6.3332782   |
| "Stam2"      | 4.14098856  | 4.19947202  | 4.0056103   | 4.11484828  | 4.14523028  | 4.16849676  | 4.13897692  | 4.10765048  |
| "Stambp"     | 5.8581841   | 5.46847275  | 5.8457432   | 5.99129155  | 5.086813    | 5.417266    | 5.66374625  | 5.4438157   |
| "Stambp11"   | 3.3959458   | 2.7866569   | 5.616092    | 3.9435399   | 4.465019    | 3.9758885   | 4.897537    | 3.7582262   |
| "Stap1"      | 2.9449193   | 2.738207    | 3.2679253   | 3.7005131   | 2.9314423   | 2.7361884   | 2.9435716   | 2.9164374   |
| "Stap2"      | 8.639411    | 8.33660765  | 8.77817     | 8.714204    | 7.8206516   | 8.36523425  | 7.8671295   | 8.39711175  |
| "Star"       | 3.4748676   | 3.289917    | 3.5864062   | 3.007698    | 3.4458935   | 3.3143866   | 3.255645    | 3.3150027   |
| "Stard10"    | 11.414264   | 12.167774   | 11.909291   | 12.114546   | 12.074227   | 11.981703   | 11.909385   | 12.076981   |
| "Stard13"    | 4.5679207   | 5.07829     | 5.022293    | 5.3746676   | 5.020462    | 4.9549146   | 5.206029    | 5.085691    |
| "Stard3"     | 7.202113    | 6.5882473   | 7.0336475   | 6.890639    | 6.8973465   | 7.5379114   | 6.8828344   | 7.110498    |
| "Stard3nl"   | 6.481249    | 6.298639    | 7.644291    | 7.2916536   | 6.137493    | 5.8326817   | 6.7348504   | 6.363162    |
| "Stard4"     | 8.922325    | 8.4088838   | 8.864624    | 8.9698383   | 7.1392095   | 5.80208945  | 7.7006536   | 9.36744     |
| "Stard5"     | 8.246646433 | 8.986418667 | 8.278164667 | 8.665538    | 8.959735667 | 8.708205333 | 8.298835333 | 8.678252167 |
| "Stard7"     | 10.400379   | 10.730401   | 10.620265   | 10.805135   | 10.885944   | 10.466932   | 10.7760725  | 10.848635   |
| "Stard8"     | 6.41772     | 6.458782    | 6.534404    | 6.1670165   | 6.879363    | 6.4691544   | 6.8139787   | 6.2574077   |
| "Stat1"      | 6.935832333 | 6.020689867 | 8.662455433 | 8.020922    | 6.7582175   | 6.173593367 | 7.958093    | 7.421994567 |
| "Stat2"      | 3.88648785  | 3.7373539   | 4.7412436   | 4.1082349   | 3.78517755  | 3.87970375  | 4.026107    | 3.88718535  |
| "Stat3"      | 10.00339575 | 9.2083435   | 10.0561     | 9.79686725  | 9.23843225  | 9.2711055   | 9.38182375  | 9.53609225  |
| "Stat5a"     | 2.4787025   | 5.5619454   | 5.759545    | 6.335234    | 5.1421914   | 5.0116053   | 6.871671    | 5.243362    |
| "Stat5b"     | 5.2520723   | 5.2202435   | 5.29286     | 5.5532378   | 5.2300927   | 5.0250505   | 5.7401695   | 5.32329215  |
| "Stat6"      | 6.12181415  | 5.70332535  | 6.434826    | 6.48064635  | 5.9853859   | 6.16793015  | 6.14119765  | 6.33107685  |
| "Stau1"      | 7.173079433 | 7.5254092   | 7.275685733 | 7.428436233 | 7.529735833 | 7.371301067 | 7.679471133 | 7.582158467 |
| "Stau2"      | 3.13893225  | 3.84010525  | 3.83137785  | 3.95276235  | 3.8920065   | 3.8825548   | 4.26356355  | 4.05454505  |
| "Stbd1"      | 7.6864104   | 9.131049    | 8.135661    | 9.073468    | 8.881309    | 9.419256    | 8.67378     | 10.461027   |
| "Stcl1"      | 2.5067677   | 2.4914026   | 2.3944407   | 2.4337485   | 2.5032625   | 2.500348    | 2.49123     | 2.4872108   |
| "Stc2"       | 2.4628985   | 2.493202    | 2.4031625   | 2.459652    | 2.5395818   | 2.5200188   | 2.4479918   | 2.5173264   |
| "Steap1"     | 2.4759489   | 2.4514027   | 2.38239595  | 2.4104711   | 2.4758355   | 2.4719521   | 2.4662892   | 2.4836894   |
| "Steap3"     | 3.1774713   | 3.3063811   | 3.69655955  | 3.29336965  | 3.3261417   | 3.32887125  | 3.48447645  | 3.2910735   |
| "Steap4"     | 10.11040385 | 6.8609678   | 10.841361   | 9.8512435   | 7.316998    | 6.05493615  | 7.195827    | 7.951188    |
| "Stfa3"      | 3.198726    | 3.2631965   | 3.0342262   | 3.104767    | 3.223424    | 3.2289147   | 3.1672342   | 3.2304337   |

|           |             |             |             |             |             |             |             |             |
|-----------|-------------|-------------|-------------|-------------|-------------|-------------|-------------|-------------|
| "Stim1"   | 6.4108525   | 6.261473    | 5.84030815  | 5.81746985  | 6.2336242   | 6.61387385  | 6.17749125  | 6.0453346   |
| "Stip1"   | 6.0395174   | 5.8157077   | 6.1721263   | 6.04155     | 6.376354    | 6.388224    | 6.505502    | 5.597358    |
| "Stk10"   | 6.6388545   | 5.497364    | 7.21564     | 6.3955317   | 5.8324447   | 6.0134497   | 6.1791906   | 5.2776246   |
| "Stk11"   | 7.6941166   | 7.377309    | 7.436672    | 7.521778    | 7.407024    | 7.32641     | 7.5086646   | 7.719422    |
| "Stk11ip" | 3.262306    | 3.1570556   | 2.7048647   | 3.134948    | 3.1688116   | 3.248971    | 3.2110999   | 3.160983    |
| "Stk16"   | 6.965521    | 7.2832856   | 7.2178555   | 7.493097    | 7.6120396   | 7.8747697   | 7.78478     | 7.8003316   |
| "Stk17b"  | 8.92881     | 6.6899205   | 8.4295115   | 7.58637325  | 6.805284    | 7.2940528   | 7.054006    | 6.6096717   |
| "Stk19"   | 6.7211413   | 5.4399757   | 4.810489    | 5.4331217   | 5.4512925   | 5.2720714   | 4.828265    | 5.4276905   |
| "Stk24"   | 6.92906165  | 7.2494061   | 6.9412967   | 7.0118809   | 7.030524    | 7.1281178   | 7.11995065  | 7.11242365  |
| "Stk25"   | 8.114531    | 8.409806    | 8.189707    | 8.147802    | 7.9756584   | 8.215982    | 8.12508     | 8.165358    |
| "Stk3"    | 4.3788001   | 4.149758033 | 4.2005981   | 4.164631067 | 4.095495    | 4.2227279   | 4.326899567 | 4.216261167 |
| "Stk31"   | 2.93742395  | 2.9390786   | 2.78073595  | 2.84081175  | 3.0064106   | 2.99358285  | 2.91307965  | 3.06204125  |
| "Stk32b"  | 2.7710989   | 2.7490222   | 2.687722    | 2.730871    | 2.7833602   | 2.7591739   | 2.7354002   | 2.753051    |
| "Stk35"   | 2.7250826   | 2.7048266   | 2.6037278   | 2.6779828   | 2.8536997   | 2.733271    | 2.6975021   | 2.7300308   |
| "Stk38"   | 8.349434    | 8.447874    | 8.462896    | 8.489304    | 8.49247     | 8.638333    | 8.692342    | 8.646364    |
| "Stk39"   | 3.1132717   | 3.106755367 | 3.0540292   | 3.1290064   | 3.09838633  | 3.18818133  | 3.231520467 | 3.162745233 |
| "Stk4"    | 3.4050972   | 3.3447852   | 3.7080688   | 3.356605    | 3.3889313   | 3.4325829   | 3.3730206   | 3.3711412   |
| "Stk40"   | 7.2528625   | 6.9091363   | 5.99172     | 6.5122023   | 6.937928    | 7.3954134   | 7.09998     | 7.086078    |
| "Stmn1"   | 5.6878983   | 5.28247725  | 6.0077645   | 5.85371035  | 5.63662925  | 6.19986     | 6.0056035   | 5.591544    |
| "Stmn3"   | 2.642964    | 2.71600745  | 2.6264731   | 2.6096959   | 2.66606365  | 2.66494525  | 2.910959    | 2.69881535  |
| "Stom"    | 4.43698926  | 4.22645388  | 4.57274738  | 4.83972724  | 4.42329448  | 4.46080906  | 4.67156286  | 4.791187    |
| "Stoml2"  | 8.012787    | 8.519588    | 8.597932    | 8.727925    | 8.560729    | 8.506683    | 8.8278      | 8.803889    |
| "Stra13"  | 6.851838    | 7.172703    | 6.8872356   | 7.614774    | 7.0478497   | 6.23933     | 7.2091813   | 7.568735    |
| "Stra6"   | 2.3620934   | 2.3759425   | 2.2425613   | 2.4970834   | 2.3818264   | 2.3748891   | 2.3079538   | 2.4533997   |
| "Strada"  | 2.3714037   | 2.4141207   | 2.3288474   | 2.3316088   | 2.3666785   | 2.9634712   | 2.3624113   | 2.351896    |
| "Strap"   | 7.968892267 | 8.195426333 | 7.618689    | 7.828082333 | 8.015161667 | 7.965949867 | 7.900670333 | 8.093717467 |
| "Strbp"   | 7.425857    | 8.18957515  | 8.05880335  | 7.2388735   | 7.165398    | 7.95569775  | 7.2471805   | 7.366569    |
| "Strn"    | 6.441642    | 6.1671243   | 6.7353206   | 6.5533113   | 5.813592    | 6.4436903   | 6.3379154   | 6.1049604   |
| "Strn3"   | 8.23233975  | 8.48090725  | 8.438414    | 8.337418    | 8.538055    | 8.726307    | 8.709197    | 8.497204    |
| "Strn4"   | 7.353333    | 7.4965777   | 7.4714766   | 7.4830856   | 7.4270816   | 7.648932    | 7.5367856   | 7.4987674   |
| "Sts"     | 6.476873    | 6.686577    | 6.0485406   | 6.4235206   | 6.58839     | 6.6472754   | 5.9852824   | 6.446028    |
| "Stt3a"   | 8.817783833 | 8.906056    | 9.045153433 | 8.868338533 | 9.016337167 | 8.549220167 | 8.910865333 | 8.914598833 |
| "Stt3b"   | 9.5813355   | 10.028796   | 9.6415      | 9.380786    | 10.1360915  | 10.013258   | 9.621955    | 9.591782    |
| "Stub1"   | 8.7023085   | 9.075096    | 8.8861375   | 8.47425035  | 8.941386    | 9.120299    | 8.6637295   | 8.98391     |
| "Stx12"   | 8.21408     | 8.491041    | 8.472853    | 8.016644    | 8.214408    | 8.097657    | 8.2692795   | 8.192297    |
| "Stx17"   | 5.346006    | 5.70610885  | 5.55270515  | 6.02372265  | 6.0984217   | 5.68231305  | 6.130531025 | 6.3618445   |
| "Stx18"   | 5.84624928  | 6.0361379   | 5.77924666  | 5.63618728  | 5.73146786  | 5.70055366  | 5.51684262  | 5.48290486  |
| "Stx1a"   | 2.5375103   | 2.50559425  | 2.4680804   | 2.478996    | 2.5438766   | 2.5240903   | 2.5273603   | 2.5183051   |
| "Stx1b"   | 2.74943805  | 2.7176565   | 2.59206175  | 2.69896225  | 2.74733675  | 2.7507965   | 2.7108592   | 2.74628185  |
| "Stx2"    | 5.679693    | 5.587146    | 5.774926    | 5.818196    | 5.5536757   | 5.527646    | 5.8175      | 5.629772    |
| "Stx3"    | 4.3449614   | 4.1682002   | 4.335408433 | 4.069918633 | 4.125116233 | 4.267705333 | 4.114135367 | 3.910610633 |
| "Stx4a"   | 7.6960263   | 7.6366143   | 8.29247     | 7.8743825   | 7.509635    | 7.6346984   | 8.034169    | 7.798209    |
| "Stx5a"   | 7.3125512   | 7.10291695  | 7.17750225  | 6.9005145   | 7.4342908   | 7.00350925  | 7.1214175   | 6.6360575   |
| "Stx6"    | 5.922838775 | 6.134040075 | 5.60337715  | 5.593673425 | 5.277467225 | 5.826743975 | 5.61229875  | 5.111209425 |
| "Stx7"    | 8.097998    | 7.717447    | 7.999988    | 7.7211227   | 7.7854877   | 7.9269495   | 7.869475    | 7.441767    |
| "Stx8"    | 5.5222608   | 5.9360222   | 5.757373867 | 5.9439169   | 5.819436867 | 5.782125433 | 5.8220766   | 5.782768767 |
| "Stxbp1"  | 2.38009495  | 2.40704095  | 2.4571367   | 2.32589675  | 2.37789565  | 2.35863005  | 2.369737    | 2.39820715  |
| "Stxbp2"  | 5.798399667 | 5.684976333 | 5.956938233 | 5.774647667 | 5.899941033 | 5.848253967 | 5.707057067 | 5.807283367 |
| "Stxbp3a" | 7.20244125  | 7.47338     | 7.0255618   | 7.18066935  | 7.25682875  | 7.3013857   | 7.20562745  | 7.32700835  |
| "Stxbp4"  | 2.63744435  | 2.60328625  | 2.5776303   | 2.7444581   | 2.6531199   | 2.6419934   | 2.6525934   | 2.6361302   |
| "Stxbp6"  | 4.7034125   | 4.9772983   | 5.514209    | 5.6746283   | 5.151414    | 5.2821236   | 6.5069304   | 5.90291     |
| "Styx1"   | 2.8072908   | 2.7808564   | 2.739615    | 2.7612872   | 2.9303646   | 2.7958434   | 2.8260539   | 2.7890995   |
| "Sub1"    | 9.0580515   | 9.21137     | 8.95744235  | 8.76300885  | 8.74350725  | 7.6701535   | 8.5130805   | 8.0822242   |
| "Sucta2"  | 11.836336   | 12.338629   | 12.019416   | 12.282122   | 12.4674225  | 12.37387    | 12.358197   | 12.46061    |
| "Suctg1"  | 10.6604595  | 11.32723    | 11.180017   | 11.295921   | 11.441701   | 11.196713   | 11.871838   | 11.610021   |
| "Suctg2"  | 8.951832    | 9.409453    | 9.692691    | 9.931761    | 9.617285    | 8.766695    | 9.552002    | 9.771168    |
| "Sucnr1"  | 4.543318    | 6.785539    | 7.4614406   | 7.574407    | 6.61983     | 5.504975    | 8.577906    | 7.7809553   |
| "Suds3"   | 7.630016    | 7.753382    | 6.80794785  | 7.5364077   | 7.58047795  | 7.6433965   | 7.28989055  | 7.73607475  |
| "Sufu"    | 5.4912424   | 4.728735    | 4.91924     | 4.9303427   | 5.1522303   | 5.2387156   | 4.9780836   | 4.864392    |
| "Supp1"   | 7.1904283   | 7.1973605   | 7.029025    | 7.2505136   | 7.091472    | 7.648033    | 6.9279246   | 6.844232    |
| "Supp2"   | 3.376163967 | 3.4843792   | 3.529354567 | 3.547715    | 3.515994    | 3.569451567 | 3.679021667 | 3.533957233 |
| "Sugt1"   | 7.4623418   | 7.4807255   | 7.12429035  | 7.0624872   | 7.221468    | 7.074639    | 7.26779865  | 7.01311     |
| "Sulf2"   | 6.2542624   | 6.5704865   | 5.539445    | 6.0209346   | 6.215621    | 6.9291973   | 6.2880406   | 5.676661    |
| "Sult1a1" | 13.920803   | 13.593912   | 13.532405   | 13.801466   | 13.111952   | 13.003129   | 12.782504   | 12.665119   |
| "Sult1b1" | 8.005616    | 10.026867   | 8.0942955   | 9.360104    | 8.7856045   | 8.884356    | 9.050197    | 8.890287    |
| "Sult1c2" | 2.8519304   | 2.8165722   | 5.2782755   | 5.4483066   | 4.751546    | 3.2226508   | 5.9568787   | 6.0386195   |
| "Sult1d1" | 11.7872825  | 12.4544685  | 10.884731   | 10.8206865  | 11.82907    | 12.0345735  | 10.8900935  | 10.9277695  |
| "Sult1e1" | 8.032536    | 9.475584    | 8.050533    | 3.5817704   | 6.5168157   | 4.115424    | 3.1454358   | 3.628622    |
| "Sult2a2" | 3.4963372   | 2.6125965   | 10.085199   | 6.071286    | 10.597218   | 6.4841757   | 11.892593   | 2.8110487   |
| "Sult2b1" | 2.5878186   | 2.5670855   | 2.507685    | 2.5236416   | 2.653802    | 2.5711648   | 2.5734265   | 2.5861223   |
| "Sult3a1" | 7.172221    | 7.2666607   | 8.262741    | 8.633657    | 9.95418     | 4.443322    | 10.460232   | 7.228355    |
| "Sult5a1" | 6.606915    | 7.909235    | 7.3293796   | 9.793893    | 7.9520354   | 7.6343503   | 8.381274    | 8.568361    |
| "Sumf1"   | 8.9732875   | 8.9241035   | 8.4641435   | 8.3078475   | 8.722953    | 8.9725765   | 8.65841935  | 8.4375741   |
| "Sumo1"   | 10.0184075  | 9.893602833 | 9.978012667 | 10.406038   | 9.802376    | 9.671436    | 9.890119667 | 10.03989967 |
| "Sumo2"   | 11.059522   | 11.226971   | 11.549697   | 11.313633   | 11.108964   | 11.009468   | 11.371752   | 11.285036   |
| "Sumo3"   | 10.392831   | 10.647897   | 10.736794   | 10.616638   | 10.566462   | 10.596596   | 10.637868   | 10.573605   |
| "Sun1"    | 4.9306196   | 4.79196875  | 4.69317085  | 4.90073025  | 4.4285805   | 4.7001562   | 4.7360022   | 4.71600855  |
| "Sun2"    | 9.754812    | 10.06532    | 8.810408    | 9.732466    | 10.100297   | 10.306323   | 9.807781    | 10.036062   |
| "Suox"    | 7.914291    | 8.779452    | 8.853216    | 9.110727    | 9.407826    | 9.030697    | 9.934099    | 9.024204    |
| "Supt16h" | 5.2899661   | 5.2962479   | 5.24297045  | 5.2913958   | 5.39437735  | 5.351694    | 5.26903855  | 5.21314835  |
| "Supt5h"  | 8.941215    | 8.816704    | 8.62184     | 8.569705    | 8.959249    | 8.94873     | 8.4299755   | 8.62505     |

|            |             |             |             |             |             |             |             |             |
|------------|-------------|-------------|-------------|-------------|-------------|-------------|-------------|-------------|
| "Supt6h"   | 5.380255    | 4.8558607   | 4.616204    | 4.627173    | 4.5528975   | 4.6925306   | 4.4287004   | 4.6474605   |
| "Supv3l1"  | 7.181515    | 7.062603    | 6.7744865   | 7.077461    | 7.176788    | 6.899432    | 6.9647255   | 7.157485    |
| "Surf1"    | 9.438803    | 9.751091    | 9.539912    | 9.912203    | 9.810437    | 9.825389    | 9.751744    | 9.834105    |
| "Surf2"    | 4.16128765  | 4.4040736   | 4.0392095   | 4.0720579   | 4.1456145   | 4.303143    | 4.0337695   | 4.0647715   |
| "Surf4"    | 8.68061222  | 9.0624788   | 8.9146204   | 8.5093003   | 9.1097961   | 8.721673    | 8.8189466   | 8.71505706  |
| "Surf6"    | 6.812484    | 6.27678     | 6.0219655   | 6.04058     | 6.238162    | 6.3531013   | 6.1097846   | 6.1643963   |
| "SUSD2"    | 2.069334    | 2.026081    | 2.1814861   | 1.9863605   | 2.0472007   | 2.3973403   | 1.9933795   | 2.0328493   |
| "SUSD4"    | 3.4323928   | 6.6487255   | 3.251586    | 6.6103115   | 3.5633533   | 4.1596417   | 3.393303    | 6.628353    |
| "Suv39h1"  | 3.4839497   | 3.8457632   | 3.2653685   | 3.533051    | 3.7620506   | 3.5717797   | 3.6296406   | 3.7457595   |
| "Suv39h2"  | 2.802059    | 2.8025994   | 2.6939151   | 2.7404776   | 2.8029935   | 2.799939    | 2.7962759   | 2.7978883   |
| "Suv420h1" | 4.861505    | 4.87271865  | 4.527858625 | 4.5566541   | 4.74871705  | 4.920334775 | 4.7498451   | 4.800773925 |
| "Suv420h2" | 3.3468256   | 3.41363     | 3.8691027   | 3.3654938   | 4.009883    | 3.7144976   | 3.4394321   | 3.638068    |
| "Suz12"    | 6.529086933 | 6.030459267 | 5.933869383 | 5.90155125  | 5.647571917 | 6.090959117 | 5.939147883 | 5.965389283 |
| "Sv2a"     | 2.293919    | 2.260161    | 2.1190424   | 2.4483416   | 2.2755444   | 2.2708504   | 2.255533    | 2.3254998   |
| "Sva"      | 2.3881006   | 2.3552926   | 2.3005652   | 2.332888    | 2.3782094   | 2.3826656   | 2.3739789   | 2.3667562   |
| "Sval2"    | 2.6817932   | 2.6646032   | 2.554957    | 2.6019406   | 2.720169    | 2.7031493   | 2.6627302   | 2.6938128   |
| "Svil"     | 6.74954715  | 6.9374833   | 7.5475518   | 7.38182825  | 6.9752138   | 7.2112665   | 7.8578095   | 7.78105425  |
| "Svs2"     | 2.75655155  | 2.73507625  | 2.6918869   | 2.7145036   | 2.7574444   | 2.7518971   | 2.6952256   | 2.75831605  |
| "Svs4"     | 2.4709687   | 2.4407635   | 2.3610268   | 2.403729    | 2.4726293   | 2.4610224   | 2.4538941   | 2.4670691   |
| "Svs5"     | 2.572545675 | 2.54820735  | 2.4708184   | 2.51320995  | 2.568834575 | 2.56681145  | 2.558947775 | 2.568206275 |
| "Svs6"     | 2.4988904   | 2.4779532   | 2.3922968   | 2.4284768   | 2.5038767   | 2.5033069   | 2.4861226   | 2.5038002   |
| "Swap70"   | 4.3372297   | 3.9866838   | 5.0614796   | 4.597036    | 4.438888    | 4.782708    | 4.403178    | 4.9630313   |
| "Swi5"     | 10.43658    | 10.448041   | 10.773534   | 10.731818   | 10.397449   | 10.248145   | 10.694452   | 10.590514   |
| "Syap1"    | 9.816908    | 10.083871   | 9.737202    | 10.035432   | 10.240475   | 9.899172    | 10.018202   | 10.032949   |
| "Syce2"    | 4.4826636   | 4.0315742   | 4.4125857   | 4.395355    | 4.64775     | 4.5214314   | 4.728959    | 4.5918903   |
| "SynC"     | 2.499366    | 2.467723    | 2.3869667   | 2.4416723   | 2.7121902   | 2.487906    | 2.4868395   | 2.486735    |
| "Sycp1"    | 2.7365139   | 2.7004356   | 2.590032    | 2.6433048   | 2.7568557   | 2.7095528   | 2.6968687   | 2.73094     |
| "Sycp3"    | 3.4329584   | 3.4317245   | 3.1735127   | 3.2043102   | 3.4841661   | 3.4832888   | 3.4353542   | 3.4535806   |
| "Syf2"     | 8.578599    | 8.590775    | 8.1935005   | 8.53215     | 8.467181    | 8.7097      | 8.422595    | 8.555248    |
| "Syk"      | 4.124242367 | 3.408644    | 4.024233767 | 3.627995167 | 3.668115267 | 3.4681095   | 3.710568433 | 3.277395633 |
| "Syn2"     | 2.8499742   | 3.0844111   | 2.5585701   | 2.5840971   | 2.625391    | 2.616751    | 2.613866    | 2.6116748   |
| "Sync"     | 2.42377495  | 2.4090105   | 2.3355397   | 2.3534051   | 2.41774905  | 2.41297425  | 2.4024241   | 2.48241555  |
| "Syncrip"  | 6.114884425 | 6.3905793   | 5.782901975 | 5.67674585  | 6.392317275 | 6.5972589   | 5.859209975 | 5.846753925 |
| "Syne1"    | 4.5100418   | 4.6342238   | 5.47889965  | 5.175247    | 4.67463735  | 4.89391515  | 5.46776555  | 5.0767759   |
| "Syne2"    | 5.686494    | 5.8587127   | 5.704779    | 6.2410455   | 5.572345    | 5.9598236   | 6.152103    | 6.562377    |
| "Syngr1"   | 2.7773197   | 2.74231755  | 2.7002922   | 2.72233965  | 2.76400995  | 2.7499529   | 2.73352205  | 2.7637757   |
| "Syngr2"   | 8.964985    | 9.0733145   | 9.158128    | 9.0974655   | 9.0570755   | 8.99970315  | 8.92106525  | 9.0410277   |
| "Syngr3"   | 2.4458704   | 2.4068596   | 2.508792    | 2.3890886   | 2.4268513   | 2.4190078   | 2.428473    | 2.3999653   |
| "Syngr4"   | 2.650941    | 2.7040381   | 2.5615432   | 2.652505    | 2.69159     | 2.6982937   | 2.6855168   | 2.6800785   |
| "Synj2"    | 2.4015857   | 2.39108665  | 2.2942129   | 2.3441721   | 2.4258902   | 2.40128765  | 2.3876343   | 2.42402615  |
| "Synj2bp"  | 7.2235168   | 7.23735865  | 7.4894745   | 7.537842425 | 7.339223225 | 7.54465575  | 7.502178625 | 7.5992411   |
| "Synpo"    | 5.397814    | 6.533797    | 4.866963    | 4.25985     | 5.314721    | 4.741026    | 4.8591647   | 3.522803    |
| "Synpr"    | 3.0436866   | 3.0119708   | 2.846799    | 2.9795434   | 3.0811508   | 3.0795493   | 2.969123    | 3.0723665   |
| "Synrg"    | 2.543115    | 2.6636126   | 2.4978755   | 2.5077739   | 2.55919     | 2.5174353   | 2.53974     | 2.5185623   |
| "Syp"      | 2.9257517   | 2.9123445   | 2.8596654   | 2.883038    | 2.923046    | 2.9181037   | 2.9075773   | 2.908668    |
| "Syp1"     | 7.98051965  | 8.02416875  | 7.779832075 | 7.934521325 | 8.23050825  | 8.146304025 | 8.19700775  | 8.007614975 |
| "Sys1"     | 6.5554732   | 6.93456365  | 7.0198135   | 6.7915983   | 6.6171984   | 6.4359252   | 6.5775555   | 6.58271     |
| "Syt1"     | 2.3161287   | 2.278733    | 2.2362065   | 2.2611434   | 2.3016052   | 2.2952209   | 2.3050811   | 2.8019898   |
| "Syt11"    | 4.554719    | 4.3028736   | 4.067233    | 4.1779776   | 4.2981024   | 5.60515     | 3.8755543   | 2.6721778   |
| "Syt13"    | 2.7133508   | 2.6864784   | 2.5642748   | 2.6736174   | 2.706338    | 2.696749    | 2.6732957   | 2.697483    |
| "Syt2"     | 2.5855389   | 2.5491984   | 2.578387    | 2.533113    | 2.5714743   | 2.5666943   | 2.574319    | 2.5729825   |
| "Syt4"     | 2.905921    | 2.921126    | 2.6917827   | 2.9124944   | 2.9704423   | 2.9555225   | 2.83891     | 2.977032    |
| "Syt6"     | 2.403221    | 2.3709092   | 2.352147    | 2.3499427   | 2.3901522   | 2.3835664   | 2.3924425   | 2.376758    |
| "Syt9"     | 2.514507    | 2.4841442   | 2.4644928   | 2.4632401   | 2.5162454   | 2.5038834   | 2.5048015   | 2.500986    |
| "Syt12"    | 2.8987448   | 2.8442864   | 3.3761907   | 2.9310336   | 2.864404    | 2.856004    | 3.6643343   | 2.9930828   |
| "Syt13"    | 2.6002514   | 2.5749621   | 2.524816    | 2.5688994   | 2.6098092   | 2.5918617   | 2.5708609   | 2.585182    |
| "Syt14"    | 2.9863835   | 2.9775425   | 3.44696025  | 2.9226853   | 3.12319685  | 3.00966925  | 3.359888    | 2.9872135   |
| "Syvn1"    | 7.371055    | 7.2880106   | 7.065133    | 6.6227136   | 8.285743    | 7.254845    | 6.8384576   | 7.140569    |
| "T"        | 2.4078577   | 2.3769746   | 2.3326046   | 2.340819    | 2.4013002   | 2.417566    | 2.3961277   | 2.3945947   |
| "T2"       | 3.073287    | 3.4287565   | 2.8794487   | 3.0556145   | 3.0768063   | 3.123536    | 3.0858448   | 3.0679467   |
| "Tab1"     | 2.9965546   | 2.9670174   | 2.9383273   | 2.9487286   | 2.975789    | 2.9923496   | 2.9857807   | 2.9672854   |
| "Tab2"     | 10.065459   | 9.19913315  | 9.896966    | 9.206581    | 9.014929    | 9.4541187   | 9.721521    | 9.2083657   |
| "Tab3"     | 6.4489956   | 6.7377224   | 5.5915675   | 6.2593937   | 6.046608    | 6.711534    | 6.21169     | 6.27945     |
| "Tac1"     | 2.948818    | 2.962478    | 2.8469846   | 2.894254    | 3.0125792   | 2.9913967   | 2.9302406   | 3.0170345   |
| "Tac4"     | 2.543377    | 2.514256    | 2.4226656   | 2.4902883   | 2.5380962   | 2.525703    | 2.5362072   | 2.5193615   |
| "Tacc2"    | 8.008084    | 8.100456    | 7.1707745   | 7.0310407   | 7.567864    | 8.156721    | 7.0149455   | 6.742955    |
| "Tacc3"    | 3.0267086   | 3.000294233 | 2.938784933 | 2.958517867 | 2.972271367 | 3.059361567 | 2.9990553   | 3.0692332   |
| "Tacr3"    | 2.44183715  | 2.4105896   | 2.3544012   | 2.3896806   | 2.43445685  | 2.43372035  | 2.4312375   | 2.4279213   |
| "Tacstd2"  | 2.4443047   | 2.4116893   | 2.3344464   | 2.3715668   | 2.436087    | 2.4331977   | 2.4284377   | 2.425611    |
| "Tada1"    | 6.600338    | 6.42708     | 6.675839    | 6.7894387   | 6.287489    | 6.9033704   | 6.8692937   | 6.717405    |
| "Tada2a"   | 6.0261965   | 6.3788147   | 6.1118817   | 6.4938116   | 6.0444775   | 6.4312487   | 6.4968166   | 6.5413785   |
| "Tada2b"   | 7.5442495   | 8.2652645   | 6.970848    | 7.221966    | 8.04816     | 7.674441    | 7.201327    | 7.475047    |
| "Tada3"    | 5.0879974   | 5.01962     | 5.4310427   | 4.7242103   | 4.958659    | 5.2843647   | 5.185215    | 4.976841    |
| "Taf10"    | 7.681285    | 7.9762377   | 7.02044195  | 7.60991415  | 7.7557925   | 7.9387205   | 7.4623595   | 7.6544396   |
| "Taf11"    | 6.442481    | 5.7620063   | 5.9979844   | 5.4654794   | 5.6687837   | 5.686524    | 5.9423227   | 5.5306315   |
| "Taf12"    | 6.480387    | 6.1013155   | 6.4931793   | 6.2753754   | 5.9618964   | 6.535014    | 6.1374063   | 5.733542    |
| "Taf13"    | 9.181964    | 8.51055     | 8.263194    | 8.39051     | 8.258621    | 8.972268    | 8.392066    | 8.166326    |
| "Taf1a"    | 5.311663    | 5.265871    | 5.2464514   | 5.2880006   | 5.3742733   | 5.288531    | 5.265362    | 5.282148    |
| "Taf1b"    | 3.6033642   | 4.371781    | 3.441558    | 3.352828    | 3.7278337   | 3.4781387   | 3.5811741   | 3.7321274   |
| "Taf1c"    | 2.7935238   | 2.7640328   | 2.9483497   | 2.7256126   | 2.7856643   | 2.9996583   | 2.7862952   | 2.7561688   |
| "Taf1d"    | 5.30014026  | 5.23511904  | 4.16800332  | 4.28778476  | 4.72721488  | 4.73717512  | 4.3541933   | 4.565522    |

|             |             |             |             |             |             |             |             |             |
|-------------|-------------|-------------|-------------|-------------|-------------|-------------|-------------|-------------|
| "Taf4a"     | 5.8625398   | 5.59284465  | 4.964135    | 5.4966178   | 5.48744285  | 6.0465572   | 5.7873828   | 5.90969985  |
| "Taf5l"     | 6.5962567   | 5.379299    | 5.609969    | 5.43898     | 5.8894      | 5.976837    | 5.689518    | 5.7263327   |
| "Taf6"      | 6.6577086   | 6.9315634   | 6.5344353   | 6.816725    | 6.828589    | 7.388647    | 6.835391    | 6.619741    |
| "Taf6l"     | 2.223199    | 2.0452354   | 2.1813836   | 2.3603039   | 2.2231648   | 2.2206314   | 2.2318149   | 2.2228932   |
| "Taf7"      | 3.8412798   | 3.0380049   | 3.09125885  | 3.04981355  | 3.0578307   | 3.0531901   | 3.9057369   | 3.0946734   |
| "Taf7l"     | 2.37915     | 2.3509808   | 2.274778    | 2.3059244   | 2.3731346   | 2.388224    | 2.365209    | 2.3837285   |
| "Taf8"      | 4.5885765   | 3.9231825   | 3.59110285  | 3.90967535  | 3.7961043   | 3.976412    | 3.50850285  | 3.7250501   |
| "Taf9"      | 8.611675    | 8.25151     | 7.3599052   | 7.6527143   | 7.8636      | 8.769697    | 7.7859626   | 8.2152195   |
| "Tagln"     | 5.493247    | 4.9458213   | 5.931855    | 5.653122    | 5.2782106   | 5.6087265   | 4.4389973   | 5.3571625   |
| "Tagln2"    | 6.51375935  | 5.931119    | 7.11040615  | 6.3082575   | 6.395111    | 6.0664921   | 6.2973535   | 6.10809335  |
| "Tagln3"    | 2.8956478   | 2.8754623   | 2.8084235   | 2.8334835   | 2.9070446   | 2.9326515   | 2.8766181   | 2.9435654   |
| "Tal1"      | 2.5457125   | 2.5181386   | 2.466276    | 2.5014777   | 2.5371873   | 2.5273917   | 2.562587    | 2.7736535   |
| "Taldo1"    | 10.84476    | 10.880317   | 11.312413   | 11.1556015  | 10.976203   | 10.65279    | 11.018207   | 11.132481   |
| "Tanc1"     | 6.256068    | 6.4002876   | 6.5423555   | 6.1723742   | 6.0475636   | 6.3120513   | 6.8372726   | 6.1660132   |
| "Tank"      | 8.240335    | 8.067446    | 7.5856586   | 7.6911426   | 7.9282594   | 7.900152    | 7.8014445   | 7.724223    |
| "Taok1"     | 6.5432645   | 6.4682908   | 6.44418485  | 6.5235615   | 6.302609725 | 6.446441975 | 6.63705305  | 6.531807375 |
| "Taok3"     | 7.211662133 | 6.831344833 | 6.946311733 | 6.854239567 | 7.1714372   | 7.402464933 | 7.419138    | 6.999761767 |
| "Tap1"      | 5.0211226   | 4.6917401   | 5.2583755   | 5.17214315  | 4.39112935  | 4.538698    | 4.83612515  | 4.83060955  |
| "Tap2"      | 6.1736593   | 5.7684236   | 7.3740644   | 6.6801386   | 6.44867     | 5.891983    | 6.3907857   | 6.278237    |
| "Tapbp"     | 7.06047955  | 6.3855925   | 8.1029437   | 7.65208975  | 6.18003005  | 6.20132775  | 6.3406966   | 6.44264545  |
| "Tapbpl"    | 4.65476515  | 4.4477955   | 5.28129045  | 5.4522385   | 4.7243131   | 4.47419285  | 4.80278655  | 4.8903637   |
| "Tarbp2"    | 5.49854765  | 5.59416235  | 5.55904365  | 5.5978572   | 5.5808338   | 5.6621505   | 5.68363235  | 5.59455725  |
| "Tardbp"    | 7.4003399   | 7.035312925 | 7.55411325  | 7.406844    | 7.034032425 | 7.627481    | 7.758467825 | 7.697966675 |
| "Tars"      | 10.641305   | 10.399737   | 10.491434   | 9.926406    | 10.631968   | 10.447355   | 10.601131   | 10.299648   |
| "Tars2"     | 6.4343735   | 5.7486968   | 6.61351815  | 6.374941    | 6.41330265  | 6.3253945   | 6.6710812   | 6.08387725  |
| "Tasp1"     | 5.0560288   | 5.6725777   | 5.02423885  | 4.8196846   | 5.228364    | 5.0489945   | 5.07498505  | 4.993826    |
| "Tat"       | 13.882459   | 13.335312   | 12.267695   | 11.805119   | 12.480798   | 13.649287   | 11.702556   | 10.962174   |
| "Tax1bp1"   | 7.552454067 | 7.927977333 | 7.2572302   | 7.487578667 | 7.5551806   | 7.626481333 | 7.583600333 | 7.505161767 |
| "Taz"       | 7.379575    | 7.5923524   | 7.647389    | 7.583175    | 7.6514773   | 7.8785377   | 7.7430296   | 7.760743    |
| "Tbata"     | 2.4571248   | 2.42801     | 2.3542754   | 2.3900791   | 2.45116075  | 2.473269    | 2.4450603   | 2.4577097   |
| "Tbcd1d10a" | 3.540492    | 3.5069685   | 3.4572592   | 3.5871577   | 3.5199475   | 3.516346    | 3.5159376   | 3.4394374   |
| "Tbcd1d10b" | 6.433947    | 6.4380198   | 6.3058352   | 6.1185746   | 6.133175    | 6.376203    | 6.1353574   | 5.636811    |
| "Tbcd1d13"  | 4.4922767   | 4.768643    | 4.733201    | 4.9006906   | 4.789091    | 4.790262    | 4.7947607   | 4.9227467   |
| "Tbcd1d14"  | 3.5191672   | 3.60633     | 3.4050267   | 3.4048393   | 3.6457956   | 3.7902434   | 3.5315852   | 3.517436    |
| "Tbcd1d15"  | 9.757925    | 8.9753325   | 8.450756    | 8.626524233 | 8.959772    | 9.1369496   | 8.891903667 | 9.084992233 |
| "Tbcd1d17"  | 6.9173975   | 6.4176764   | 6.0004973   | 6.4064927   | 6.526608    | 7.183501    | 6.3087006   | 6.723319    |
| "Tbcd1d19"  | 3.9168482   | 3.4137146   | 5.596818    | 5.2277517   | 3.7747347   | 3.9780793   | 4.9544525   | 4.4284396   |
| "Tbcd1d20"  | 6.90617155  | 7.2387845   | 6.99196985  | 7.354418    | 7.0977426   | 7.2296418   | 7.04025575  | 7.3456145   |
| "Tbcd1d22a" | 4.96483065  | 4.9104782   | 4.94325055  | 4.9031755   | 4.9783275   | 5.09636885  | 4.85916485  | 4.9184829   |
| "Tbcd1d23"  | 3.5282003   | 3.5991347   | 3.60883035  | 3.3546293   | 3.36746725  | 3.3415053   | 3.38687205  | 3.31210755  |
| "Tbcd1d24"  | 9.916844    | 10.25818    | 9.476209    | 10.1227455  | 9.87131     | 10.150308   | 9.165181    | 9.939736    |
| "Tbcd1d8"   | 8.3823155   | 6.301557    | 5.09596205  | 4.75575935  | 5.8456415   | 6.78105365  | 4.9446186   | 5.1926217   |
| "Tbcd1d8b"  | 3.007561    | 2.989808    | 2.9412725   | 2.9567523   | 3.0915122   | 3.0217016   | 3.0217957   | 3.1481035   |
| "Tbca"      | 9.5145999   | 9.52574805  | 9.333282625 | 9.363800125 | 9.420438425 | 9.52660875  | 9.5164945   | 9.392905    |
| "Tbcb"      | 8.350622    | 8.941949    | 9.108515    | 9.065027    | 8.861125    | 8.836491    | 9.012226    | 8.813067    |
| "Tbcc"      | 6.3691864   | 6.342985    | 5.963343    | 5.503443    | 5.0856586   | 6.206842    | 5.5325065   | 5.082574    |
| "Tbcd"      | 6.42626075  | 7.1797635   | 7.5361038   | 7.1564303   | 6.9980066   | 6.77654115  | 7.05121945  | 7.1504522   |
| "Tbce"      | 7.047689    | 8.001075    | 7.8346434   | 7.5950017   | 7.5064297   | 7.386859    | 7.527062    | 7.729909    |
| "Tbcel"     | 7.97525865  | 9.578823    | 9.200768    | 9.6831455   | 8.7698415   | 8.4642985   | 9.10085     | 9.949011    |
| "Tbk1"      | 9.717399    | 8.9274515   | 8.857813    | 9.0344395   | 8.676812    | 9.088778    | 8.913921    | 8.86453875  |
| "Tbl1x"     | 5.463366667 | 5.2604284   | 5.6435971   | 5.8405      | 5.5095992   | 5.328157433 | 5.966136133 | 5.898666167 |
| "Tbl1xr1"   | 4.841695975 | 5.4440852   | 5.08573255  | 5.00016465  | 4.683883575 | 5.041183325 | 5.056392225 | 4.792449625 |
| "Tbl2"      | 4.02863175  | 4.49243005  | 3.9776387   | 4.0878339   | 4.1701962   | 4.36244415  | 3.713258    | 3.98200055  |
| "Tbl3"      | 4.22856     | 4.85808     | 4.3546257   | 4.31181     | 4.3624935   | 4.21451     | 4.2194386   | 3.9514582   |
| "Tbp"       | 2.9778348   | 2.8886142   | 2.8359635   | 2.95365455  | 2.99870515  | 3.17216565  | 2.9007684   | 3.048655735 |
| "Tbpl1"     | 7.029859    | 6.5136867   | 6.375714    | 6.385482    | 6.6488595   | 7.4278307   | 5.9304504   | 7.0430784   |
| "Tbr1"      | 3.379802    | 3.4610226   | 3.2105188   | 3.2976656   | 3.5677357   | 3.5738528   | 3.3139303   | 3.639786    |
| "Tbrg1"     | 10.00118    | 10.15519    | 9.774674    | 9.048304    | 9.350993    | 9.308385    | 8.901167    | 8.703404    |
| "Tbrg4"     | 5.058090733 | 5.1359801   | 4.660556133 | 4.6645973   | 5.336147667 | 5.0884042   | 4.6798479   | 4.8223226   |
| "Tbx15"     | 2.6903293   | 2.6724515   | 2.55301     | 2.5916567   | 2.6440825   | 2.7519646   | 2.6055667   | 3.0378838   |
| "Tbx18"     | 2.6933143   | 2.6724946   | 2.5531943   | 2.646564    | 2.6920187   | 2.6830847   | 2.694804    | 2.6766489   |
| "Tbx19"     | 2.267635    | 2.4049256   | 2.1927962   | 2.216631    | 2.2586699   | 2.2513416   | 2.2574055   | 2.2384946   |
| "Tbx2"      | 2.840515    | 2.4898536   | 2.4056873   | 2.4433258   | 2.48651     | 2.445364    | 3.1334682   | 2.5116239   |
| "Tbx3"      | 3.98277285  | 4.3426192   | 4.2365869   | 4.50157465  | 4.72220495  | 4.2130145   | 5.07613635  | 4.5056572   |
| "Tbxa2r"    | 3.8420548   | 3.8083475   | 3.6866632   | 3.7527814   | 3.904115    | 3.8217485   | 3.828808    | 3.819395    |
| "Tbxas1"    | 5.1381545   | 4.558176    | 6.1710987   | 5.3534484   | 5.136687    | 5.078673    | 5.3859406   | 5.1098156   |
| "Tc2n"      | 2.944264567 | 2.943098567 | 2.8089017   | 2.863739267 | 2.9576198   | 3.029137733 | 2.906109033 | 3.0097762   |
| "Tcea1"     | 7.45484375  | 7.624551    | 7.148763    | 7.208312    | 7.46732475  | 7.668867    | 7.4617655   | 7.72154535  |
| "Tcea3"     | 7.5260315   | 7.9512553   | 9.450813    | 9.829966    | 8.633343    | 7.1936035   | 9.7669325   | 9.549733    |
| "Tceal1"    | 4.5226603   | 3.8563325   | 5.280571    | 4.632829    | 2.955831    | 3.7896638   | 5.6998677   | 4.5252275   |
| "Tceal8"    | 8.859144    | 9.23867     | 10.298073   | 9.143787    | 9.659559    | 8.672483    | 9.548253    | 8.409943    |
| "Tceb1"     | 7.157811625 | 7.394052225 | 7.250423    | 7.29094405  | 7.13561355  | 7.119462925 | 7.206645    | 7.048900875 |
| "Tceb2"     | 10.4080375  | 10.7398095  | 10.868463   | 10.7308345  | 10.6336205  | 10.5570895  | 10.844401   | 10.753325   |
| "Tceb3"     | 7.3250965   | 6.9478195   | 7.1526215   | 7.0592456   | 6.8251783   | 7.0653043   | 7.141814    | 6.9718177   |
| "Tcerg1"    | 6.0450513   | 5.861998767 | 5.499607267 | 5.185012067 | 5.654143933 | 5.2133749   | 5.391085433 | 5.503936    |
| "Tcf12"     | 7.2337705   | 7.01640165  | 6.752972    | 6.59807275  | 6.664999    | 7.0545095   | 6.682554    | 6.5851225   |
| "Tcf15"     | 3.1232088   | 3.089275    | 3.0371554   | 3.0742433   | 3.1076677   | 3.0986063   | 3.110646    | 3.094349    |
| "Tcf19"     | 4.779389    | 4.9812536   | 5.0296917   | 5.9642353   | 5.1256666   | 5.0952196   | 5.8016615   | 5.7415333   |
| "Tcf20"     | 4.9512707   | 5.24976375  | 5.181316    | 5.1788776   | 5.15127405  | 4.94630445  | 5.09893275  | 5.23706915  |
| "Tcf21"     | 4.7351203   | 4.071629    | 6.2795544   | 5.8218555   | 5.5187783   | 5.512391    | 6.295888    | 5.7578425   |
| "Tcf23"     | 2.7146916   | 2.6964602   | 2.6192636   | 2.6245313   | 2.7410302   | 2.7310395   | 2.6917062   | 2.701467    |

|            |             |             |             |             |             |             |             |             |
|------------|-------------|-------------|-------------|-------------|-------------|-------------|-------------|-------------|
| "Tcf25"    | 8.000298475 | 8.047878825 | 7.6395612   | 7.8352896   | 7.773776175 | 7.792911425 | 7.556126925 | 7.808682125 |
| "Tcf3"     | 3.73428185  | 3.7654813   | 3.8212475   | 3.8339417   | 3.5042963   | 3.7115978   | 3.4876578   | 3.7192317   |
| "Tcf4"     | 6.17370975  | 5.50596995  | 6.186816517 | 5.889258417 | 5.747603583 | 5.801964383 | 6.203685917 | 5.910950367 |
| "Tcf7"     | 2.84314285  | 2.8823837   | 2.86726035  | 2.64929095  | 3.00177895  | 2.91945485  | 3.0523399   | 2.979033    |
| "Tcf711"   | 5.0270688   | 4.7300675   | 4.5390656   | 4.39096725  | 4.68178     | 4.599572    | 4.6775815   | 4.59282385  |
| "Tcf712"   | 4.483753933 | 4.519103333 | 4.572142033 | 4.659124267 | 4.650572067 | 4.626995567 | 5.0225073   | 4.704127733 |
| "Tcf15"    | 2.535299    | 2.5111456   | 2.4912317   | 2.4532776   | 2.5352433   | 2.5278668   | 2.5245109   | 2.5206866   |
| "Tchh"     | 3.9933453   | 4.85168     | 3.7111633   | 3.9048178   | 4.213339    | 4.0399427   | 3.676498    | 4.045735    |
| "Tcirg1"   | 6.821943    | 6.8028507   | 7.990286    | 7.466829    | 6.776948    | 6.7321396   | 7.1813617   | 7.082016    |
| "Tcl1b3"   | 7.1493087   | 6.880274    | 6.8650537   | 6.8418875   | 6.896537    | 6.9390116   | 6.037665    | 6.8781695   |
| "Tcn2"     | 9.4381075   | 8.853219    | 9.012339    | 9.197509    | 9.912128    | 9.282893    | 9.246144    | 8.436943    |
| "Tcof1"    | 4.077402933 | 4.0312952   | 4.1945377   | 4.087247233 | 4.0187734   | 4.2477406   | 4.085005567 | 4.084431233 |
| "Tcp1"     | 10.013566   | 10.322556   | 9.329556    | 9.386321    | 10.224388   | 10.563391   | 9.612947    | 9.957545    |
| "Tcp10a"   | 2.8336599   | 2.8312857   | 2.815215833 | 2.820308867 | 2.8549806   | 2.848672367 | 2.820086233 | 2.849527933 |
| "Tcp10b"   | 3.1103375   | 3.1118267   | 2.9322588   | 3.0678163   | 3.1782682   | 3.1875684   | 3.1027951   | 3.2337022   |
| "Tcrb-J"   | 2.84961176  | 2.80696902  | 2.9085937   | 2.79466104  | 2.85446752  | 2.85011112  | 2.94839122  | 2.8363878   |
| "Tcrg-V1"  | 2.2445073   | 2.2061749   | 2.3471186   | 2.2062733   | 2.2284815   | 2.2211494   | 2.2419403   | 2.2228086   |
| "Tcrg-V4"  | 2.978240367 | 2.9764957   | 3.226068933 | 2.991381267 | 3.035580467 | 3.028026667 | 3.0894057   | 3.0319633   |
| "Tcstv1"   | 2.4847162   | 2.4593523   | 2.3931546   | 2.4268212   | 2.4819016   | 2.4811454   | 2.468229    | 2.4778264   |
| "Tcta"     | 5.235561825 | 5.722556825 | 5.465650375 | 5.5938673   | 6.1434167   | 5.7035864   | 5.987127775 | 5.63072135  |
| "Tcte1"    | 2.3823116   | 2.364222    | 2.3137467   | 2.3394735   | 2.3801696   | 2.3745296   | 2.373476    | 2.3680353   |
| "Tctextd1" | 2.9055915   | 2.9268417   | 2.7506201   | 2.811865    | 2.9357343   | 2.9372027   | 2.8743334   | 2.9364378   |
| "Tctn2"    | 2.4537652   | 2.4110353   | 2.548118    | 2.4290848   | 2.5167513   | 2.4023495   | 2.4428908   | 2.4282966   |
| "Tctn3"    | 2.328473    | 2.53617635  | 2.7035105   | 2.31234665  | 2.3257396   | 2.3194275   | 2.2921537   | 2.3050215   |
| "Tdgf1"    | 2.82144005  | 2.8094227   | 2.6828551   | 2.7396386   | 2.8752205   | 2.8386483   | 2.797472    | 2.8548858   |
| "Tdo2"     | 13.191792   | 13.9372325  | 13.083802   | 13.54575    | 13.240806   | 13.491257   | 12.3759515  | 12.801718   |
| "Tdp1"     | 2.341461    | 2.4020023   | 2.2920346   | 2.3937104   | 2.3449554   | 2.3291364   | 2.3461385   | 2.3270516   |
| "Tdp2"     | 8.644201    | 8.105944    | 8.822649    | 8.724208    | 8.41395     | 8.37528     | 9.05821     | 8.914256    |
| "Tdpoz1"   | 2.385856    | 2.3602452   | 2.2600448   | 2.3105383   | 2.3824284   | 2.3869734   | 2.3615568   | 2.444112    |
| "Tdrd1"    | 2.4636095   | 2.4405608   | 2.3561401   | 2.3907723   | 2.460992    | 2.4569943   | 2.4510403   | 2.454739    |
| "Tdrd3"    | 6.284326    | 6.192108    | 6.0920005   | 6.178218    | 6.405618    | 6.8833027   | 6.2691627   | 6.35616     |
| "Tdrd7"    | 8.617891    | 8.979956    | 9.369974    | 9.26164     | 8.601654    | 8.640374    | 8.759985    | 8.996902    |
| "Tead2"    | 2.7309158   | 2.7030733   | 2.5885384   | 2.6731987   | 2.7621303   | 2.723552    | 2.7738492   | 2.7674217   |
| "Tead3"    | 4.1302767   | 4.591772    | 4.3156395   | 4.2607417   | 4.6025143   | 4.6624603   | 4.3004127   | 4.6425285   |
| "Tead4"    | 2.5161719   | 2.48718705  | 2.4374556   | 2.47215235  | 2.5156276   | 2.51185415  | 2.50340895  | 2.5117482   |
| "Tec"      | 6.6610403   | 8.885543    | 8.383825    | 8.360773    | 8.891094    | 8.637753    | 8.348745    | 8.374802    |
| "Tecpr1"   | 3.8616531   | 3.8579141   | 4.00160475  | 3.94793715  | 3.855654    | 3.94443031  | 3.9764359   | 3.83935965  |
| "Tecer"    | 7.9544915   | 8.6698625   | 8.722792    | 8.7651005   | 8.50056     | 7.659857    | 8.540868    | 8.85867     |
| "Tecta"    | 2.6507664   | 2.6184545   | 2.566688    | 2.5631475   | 2.6410174   | 2.6491826   | 2.5873122   | 2.662353    |
| "Tef"      | 4.201038267 | 5.990400833 | 5.403107667 | 6.202544067 | 6.2843261   | 5.873800067 | 5.864169467 | 6.431127333 |
| "Tek"      | 7.310748    | 6.62705     | 6.824898    | 7.555114    | 7.612961    | 6.8981752   | 7.900812    | 7.535826    |
| "Tek11"    | 3.010237    | 2.9772089   | 2.8282967   | 2.8694026   | 3.0138893   | 3.0160453   | 2.9161      | 3.0147476   |
| "Telo2"    | 3.928687933 | 3.699617233 | 3.812332533 | 3.8037989   | 3.730837733 | 3.790645267 | 3.747940967 | 3.9007977   |
| "Tenc1"    | 6.3486385   | 7.191505    | 6.9105544   | 6.7570877   | 6.5297484   | 7.364196    | 6.1559324   | 6.829459    |
| "Tep1"     | 6.4691224   | 5.840704    | 7.4580154   | 6.9288173   | 6.3516726   | 6.341387    | 6.4637995   | 6.4835973   |
| "Terf1"    | 5.95812015  | 5.607832    | 5.5310917   | 5.814857    | 5.6169894   | 5.9521868   | 6.0728313   | 5.83004355  |
| "Terf2"    | 6.0752783   | 5.835499    | 5.9810667   | 5.887493    | 5.8587112   | 5.849362    | 5.6134243   | 5.635623    |
| "Terf2ip"  | 5.02560815  | 5.2452136   | 4.21570695  | 4.6018935   | 4.785379    | 4.9344065   | 5.109089    | 4.67376805  |
| "Tes"      | 3.59216     | 4.2617145   | 3.17358805  | 3.21702125  | 3.2454406   | 3.61180365  | 3.2291075   | 3.24004085  |
| "Tes3-ps"  | 5.5196233   | 5.9569106   | 5.8695207   | 5.764935    | 5.069653    | 5.233508    | 5.4013066   | 5.44922     |
| "Tesc"     | 2.4727737   | 2.44060925  | 2.5236633   | 2.613286    | 2.49648015  | 2.4584007   | 2.46025705  | 2.4560303   |
| "Tesk1"    | 4.0643187   | 3.7629547   | 3.266323    | 3.4380705   | 3.4756503   | 3.7894711   | 3.407342    | 3.463081    |
| "Tesk2"    | 7.2687197   | 7.341273    | 7.4405317   | 7.413486    | 7.408857    | 7.3673816   | 7.4839373   | 7.7615304   |
| "Tet1"     | 2.58751     | 2.5511777   | 2.4755716   | 2.5373201   | 2.571871    | 2.5858078   | 2.5678022   | 2.5579765   |
| "Tex10"    | 7.9351225   | 7.4916577   | 7.1364775   | 7.15359015  | 7.131804    | 7.3457448   | 7.41758     | 7.315317    |
| "Tex101"   | 2.494509    | 2.466129    | 2.4162495   | 2.4413245   | 2.4855547   | 2.473761    | 2.458947    | 2.4681842   |
| "Tex11"    | 2.6997108   | 2.669544    | 2.5799246   | 2.6202445   | 2.6998482   | 2.7043414   | 2.674356    | 2.7017379   |
| "Tex12"    | 3.0424342   | 3.4779894   | 3.447795    | 3.3406615   | 3.496252    | 3.9091733   | 3.7021983   | 3.4828737   |
| "Tex13"    | 2.6348106   | 2.6057602   | 2.5163475   | 2.5497738   | 2.6453189   | 2.629249    | 2.609041    | 2.638518    |
| "Tex14"    | 2.7105436   | 2.6682775   | 2.6480145   | 2.7356508   | 2.6960442   | 2.693334    | 2.6861634   | 2.695763    |
| "Tex16"    | 2.5066354   | 2.4753513   | 2.391926    | 2.4280636   | 2.5005147   | 2.4976528   | 2.488523    | 2.4921222   |
| "Tex18"    | 2.524988    | 2.500848    | 2.4262593   | 2.4749093   | 2.5251703   | 2.517376    | 2.517064    | 2.5185432   |
| "Tex19.2"  | 2.4502506   | 2.4291668   | 2.379785    | 2.3997667   | 2.4498818   | 2.441857    | 2.4320426   | 2.4352336   |
| "Tex2"     | 10.239084   | 10.020527   | 10.373835   | 10.331424   | 10.099665   | 9.972357    | 10.304177   | 10.042758   |
| "Tex21"    | 3.3562144   | 3.33432845  | 3.24908245  | 3.26733565  | 3.4377029   | 3.4083719   | 3.2500873   | 3.42322715  |
| "Tex261"   | 5.576564767 | 6.341674333 | 6.535666867 | 6.465671    | 6.1819234   | 5.960629667 | 6.042453967 | 6.141364667 |
| "Tex264"   | 8.194937    | 8.686764    | 8.684194    | 9.091253    | 8.686937    | 8.582741    | 8.823982    | 8.710307    |
| "Tex9"     | 2.75660585  | 2.7240342   | 2.6845757   | 2.73922585  | 2.7744866   | 2.82569695  | 2.72554445  | 2.7402543   |
| "Tfam"     | 8.991963    | 9.673656    | 9.365123    | 9.564622    | 9.866255    | 9.99415     | 10.290689   | 9.918825    |
| "Tfap2a"   | 2.58283125  | 2.7079664   | 2.4911381   | 2.53194145  | 2.61105155  | 2.5668421   | 2.56588815  | 2.5570239   |
| "Tfap2c"   | 3.35684955  | 3.3395766   | 3.1940241   | 3.3130228   | 3.48742725  | 3.4163046   | 3.3021367   | 3.50561485  |
| "Tfap2d"   | 2.5028806   | 2.4737976   | 2.4278805   | 2.450974    | 2.4984212   | 2.4915066   | 2.4899912   | 2.5428023   |
| "Tfap4"    | 2.523848    | 2.467034    | 2.3929746   | 2.4751904   | 2.5077794   | 2.501295    | 2.4829135   | 2.5460649   |
| "Tfb1m"    | 6.5009568   | 7.0755685   | 6.631285    | 6.52034725  | 6.2115302   | 6.6635428   | 6.36290325  | 5.9193182   |
| "Tfb2m"    | 8.840423    | 9.105939    | 8.175975    | 8.538634    | 9.407457    | 9.249858    | 8.865873    | 8.875982    |
| "Tfcp2"    | 3.53581     | 3.7398307   | 3.7138505   | 3.7077305   | 3.5528328   | 4.020813    | 3.7769353   | 3.8265772   |
| "Tfcp2l1"  | 2.800158933 | 2.8044622   | 2.801018467 | 2.718975833 | 2.936232767 | 2.802477967 | 2.7867566   | 2.810597467 |
| "Tfdp1"    | 7.641111    | 8.025954    | 7.643654    | 7.1604886   | 8.121746    | 7.673873    | 7.257474    | 7.453673    |
| "Tfeb"     | 3.20482     | 3.3398988   | 3.1559374   | 3.163663    | 3.2092376   | 3.2006009   | 3.211157    | 3.1938963   |
| "Tfec"     | 5.106517    | 4.4468427   | 7.0607834   | 5.895552    | 5.486286    | 6.100276    | 5.6892967   | 4.770235    |
| "Tff2"     | 2.8420076   | 2.7954404   | 2.7741656   | 2.7763646   | 2.9029534   | 2.8224192   | 2.8336236   | 2.816135    |

|            |             |             |             |             |             |             |             |             |
|------------|-------------|-------------|-------------|-------------|-------------|-------------|-------------|-------------|
| "Tff3"     | 10.781515   | 10.844293   | 13.2733965  | 10.71191    | 7.1449857   | 12.027422   | 4.758031    | 10.761181   |
| "Tffg"     | 8.521625    | 9.2474985   | 9.252419    | 8.873838    | 9.401307    | 9.213926    | 9.00212     | 9.22397     |
| "Tfip11"   | 6.2295325   | 5.6391175   | 5.89946485  | 6.0444215   | 6.25890135  | 5.9608758   | 5.9384748   | 5.7948133   |
| "Tfpi"     | 4.7256824   | 3.958595067 | 5.082612133 | 5.450734    | 4.291881667 | 4.592335    | 5.4108712   | 4.5450087   |
| "Tfpi2"    | 9.437507    | 9.194747    | 10.1714     | 10.130406   | 9.487095    | 9.748221    | 10.7226715  | 10.11937    |
| "Tfpt"     | 3.744464725 | 3.8046943   | 3.72741205  | 3.730127525 | 4.009604    | 3.85695735  | 3.7802202   | 3.766406225 |
| "Tftr2"    | 12.1022665  | 12.1446375  | 12.0706935  | 12.1714395  | 12.2488065  | 12.38533425 | 12.1501765  | 12.222718   |
| "Tftrc"    | 4.1686243   | 3.947781317 | 4.160034867 | 3.89818485  | 3.92663955  | 3.827013133 | 3.71478425  | 3.713488983 |
| "Tgds"     | 9.698855    | 9.357525    | 9.047207    | 9.086098    | 8.948593    | 8.981775    | 8.693223    | 8.51707     |
| "Tgfa"     | 4.52725385  | 4.671034    | 4.9023533   | 4.5445262   | 4.035208    | 3.7725072   | 4.381608    | 4.47854265  |
| "Tgfb1i1"  | 2.4953628   | 2.4739418   | 2.4640846   | 2.4630432   | 2.4999151   | 2.4896274   | 2.499464    | 2.5153766   |
| "Tgfb2"    | 2.5760989   | 2.556451733 | 2.507763533 | 2.5459766   | 2.5784092   | 2.576843833 | 2.569310533 | 2.5646855   |
| "Tgfb3"    | 2.644804    | 1.8455912   | 1.7631111   | 1.7791301   | 1.8088279   | 1.8036407   | 1.813783    | 1.7985072   |
| "Tgfbf"    | 9.538389375 | 8.334479825 | 10.20878    | 9.25818475  | 9.29194525  | 8.6735475   | 9.49580325  | 8.67393775  |
| "Tgfbf1"   | 5.78275025  | 5.9111007   | 5.49366315  | 5.580084    | 5.88443415  | 5.7652658   | 5.6406101   | 5.865768    |
| "Tgfbf2"   | 5.042040833 | 5.1998025   | 4.935012667 | 5.095549833 | 5.1808088   | 4.861687767 | 4.933071733 | 5.067505233 |
| "Tgif1"    | 7.688467    | 6.087011    | 6.234923    | 6.236078    | 5.5761704   | 6.5117126   | 6.2644067   | 6.113758    |
| "Tgif2lx1" | 2.5293286   | 2.5007825   | 2.41451     | 2.4639285   | 2.5232983   | 2.5178733   | 2.5083742   | 2.5662518   |
| "Tgm1"     | 6.780355    | 6.006233    | 6.372236    | 6.1187906   | 5.229383    | 5.7785683   | 4.828558    | 5.660831    |
| "Tgm2"     | 9.684183    | 8.022706767 | 9.084326383 | 8.20818445  | 8.02665235  | 8.198052433 | 8.371679333 | 7.98087655  |
| "Tgoin1"   | 8.08960775  | 8.5831115   | 7.75324785  | 8.192162375 | 8.80845475  | 9.35337975  | 8.740346    | 8.592980875 |
| "Tgs1"     | 5.76558865  | 6.2017676   | 6.40855825  | 6.27183525  | 6.32054575  | 6.197005    | 6.305157275 | 6.154802625 |
| "Tgtp1"    | 10.257873   | 10.211495   | 11.769092   | 10.797027   | 8.198069    | 9.637511    | 9.666999    | 9.259403    |
| "Th11"     | 6.3130436   | 7.160515    | 6.8497286   | 6.850141    | 6.965265    | 6.9562106   | 6.9633145   | 7.0941377   |
| "Tha1"     | 3.7273772   | 5.077743    | 4.3052526   | 4.205981    | 4.936598    | 4.3783345   | 4.121017    | 4.3977885   |
| "Thap11"   | 8.346039    | 8.141307    | 7.3131795   | 7.756723    | 7.6981015   | 8.309783    | 7.778965    | 7.9155884   |
| "Thap2"    | 3.984532    | 4.176875    | 3.893269    | 3.9305387   | 4.066438    | 4.0221114   | 3.9288514   | 3.977239    |
| "Thap4"    | 7.144398    | 7.176144    | 6.499096    | 6.8903365   | 6.0168324   | 6.8672953   | 7.137305    | 6.945401    |
| "Thap7"    | 5.1823392   | 5.694944233 | 5.184753267 | 5.220670333 | 5.108675767 | 5.305755567 | 4.974547367 | 5.27246433  |
| "Thbd"     | 8.18854     | 7.187605    | 5.695106    | 6.173248    | 6.5908504   | 6.339793    | 5.3380256   | 5.695989    |
| "Thbs1"    | 5.15178535  | 4.4329669   | 4.76523875  | 4.5088807   | 4.2377567   | 4.49026285  | 4.5145667   | 3.9062705   |
| "Thbs2"    | 2.417117    | 2.5461936   | 2.5203047   | 2.6647987   | 2.5721335   | 2.5729387   | 2.9299488   | 2.5580177   |
| "Them4"    | 5.9600496   | 6.1675453   | 5.6887417   | 5.877043    | 6.64448     | 7.181136    | 6.3216586   | 6.7170997   |
| "Thns1"    | 3.1728886   | 3.4647148   | 3.4116652   | 3.3892232   | 3.52121605  | 3.5037546   | 3.668262    | 3.55551685  |
| "Thns2"    | 6.4506817   | 7.281488    | 7.9531684   | 8.136151    | 7.6009274   | 6.962144    | 7.316461    | 7.7314396   |
| "Thoc1"    | 6.090884625 | 5.8989511   | 5.701889575 | 5.724579025 | 5.986476275 | 6.337267425 | 6.13592125  | 6.07443575  |
| "Thoc2"    | 5.83839085  | 5.86020255  | 5.88226685  | 5.77474405  | 5.9238687   | 6.2264835   | 6.1040692   | 5.8983161   |
| "Thoc3"    | 5.97301485  | 6.7150531   | 6.4582297   | 6.42129685  | 6.8332075   | 6.41926585  | 6.1600778   | 6.49173815  |
| "Thoc6"    | 4.914299    | 4.703033    | 4.9304976   | 4.8323526   | 4.331512    | 4.7762384   | 4.8383837   | 4.843235    |
| "Thoc7"    | 6.773839    | 6.8047395   | 6.3475105   | 6.5070644   | 6.632079    | 6.7892613   | 6.7158777   | 6.5896244   |
| "Thop1"    | 2.5657446   | 2.5359806   | 2.52575435  | 2.63994195  | 2.41801575  | 2.5515686   | 2.55971265  | 2.5393418   |
| "Thpo"     | 2.8528059   | 2.8322942   | 3.1580865   | 2.796458    | 2.8303668   | 2.8312547   | 2.8399303   | 2.8174965   |
| "Thra"     | 3.8625394   | 4.1854028   | 4.41332085  | 4.2910431   | 4.12766275  | 4.2059175   | 4.23857635  | 4.32512275  |
| "Thrap3"   | 7.1067144   | 6.9188978   | 6.737395133 | 6.7044619   | 6.8905228   | 6.8161715   | 7.107009233 | 6.810069467 |
| "Thrsp"    | 8.2639135   | 12.9322885  | 11.15128825 | 12.33562625 | 13.2362495  | 9.689506    | 11.059726   | 12.469006   |
| "Thsd1"    | 2.9052727   | 2.9266653   | 2.8099513   | 2.8997138   | 2.9942024   | 2.908178    | 2.8813787   | 2.881847    |
| "Thtpa"    | 5.47838665  | 5.79775735  | 5.13815975  | 5.92212675  | 5.78404575  | 6.1203753   | 5.8798105   | 6.1312583   |
| "Thumpd1"  | 7.856254    | 7.444229    | 7.26971     | 6.9292083   | 6.86229     | 7.0908146   | 6.9332547   | 6.5720496   |
| "Thumpd3"  | 5.804167    | 6.1210596   | 5.73309635  | 5.7338747   | 6.02079765  | 6.35263825  | 5.8613558   | 5.87198605  |
| "Thy1"     | 2.3341045   | 2.3183188   | 2.3312247   | 2.3065653   | 2.3372247   | 2.3332517   | 2.3344288   | 2.3238602   |
| "Thyn1"    | 5.61192215  | 6.0249121   | 6.5731008   | 6.0089636   | 5.76950265  | 5.9633732   | 6.6695545   | 6.1275123   |
| "Tia1"     | 4.5576254   | 5.133727867 | 5.194123433 | 4.795645333 | 4.994412867 | 5.177485667 | 5.244110667 | 4.8773556   |
| "Tiaf2"    | 2.4180841   | 2.384341    | 2.3379214   | 2.362745    | 2.4039848   | 2.4203017   | 2.4032333   | 2.6188      |
| "Tial1"    | 7.16690225  | 6.935656125 | 6.91528375  | 6.896733575 | 6.7683224   | 7.130213975 | 7.005851375 | 7.272346    |
| "Tiam1"    | 2.342096    | 2.3271022   | 2.5366623   | 2.2856288   | 2.3330877   | 2.321011    | 3.2448947   | 2.3108253   |
| "Tiam2"    | 3.0519363   | 3.84408275  | 3.065592    | 3.8189319   | 4.1748015   | 3.6815293   | 3.8040597   | 5.0275836   |
| "Tie1"     | 2.4665926   | 2.450452    | 2.4083984   | 2.430521    | 2.4753664   | 2.462107    | 2.444699    | 2.4554074   |
| "Tifa"     | 9.174273    | 5.3636737   | 8.829646    | 8.204977    | 5.245805    | 6.541175    | 6.6551156   | 7.683781    |
| "Tigd5"    | 4.1468573   | 4.503447    | 4.269252    | 4.2967434   | 4.3399143   | 4.551208    | 4.3466196   | 4.2638726   |
| "Timd2"    | 6.4190638   | 8.0493338   | 8.4153247   | 9.01272295  | 8.6111933   | 8.1815075   | 8.6522205   | 8.571828    |
| "Timeless" | 2.9011056   | 2.97345765  | 3.36608955  | 3.13906975  | 2.83399045  | 2.89552435  | 2.8720753   | 2.8880936   |
| "Timm10"   | 9.911701    | 10.452758   | 8.990618    | 9.402502    | 9.8844185   | 10.490569   | 9.102421    | 9.529398    |
| "Timm13"   | 10.594105   | 11.151018   | 10.860235   | 10.847361   | 10.891054   | 10.880475   | 10.768969   | 10.738915   |
| "Timm17a"  | 9.422356    | 9.978081    | 9.385821    | 9.479631    | 9.276174    | 9.439051    | 9.217074    | 9.495897    |
| "Timm17b"  | 8.4578958   | 8.915546    | 8.5301225   | 8.460044    | 8.4333365   | 8.609911    | 8.67902865  | 8.344223    |
| "Timm22"   | 4.737847    | 4.95360735  | 4.684615    | 4.6880915   | 4.73491595  | 4.6292831   | 4.73679285  | 4.7097701   |
| "Timm23"   | 11.423258   | 11.742658   | 11.326292   | 11.286701   | 11.559481   | 11.475136   | 11.185485   | 11.277531   |
| "Timm44"   | 7.9517138   | 7.930578333 | 7.755607667 | 7.892898    | 8.048715667 | 8.092377533 | 7.934744667 | 8.118691    |
| "Timm50"   | 7.2356267   | 7.6895385   | 7.4056425   | 7.643718    | 7.457699    | 7.5532007   | 7.460494    | 7.600571    |
| "Timm8a1"  | 8.9538755   | 9.3213535   | 9.0621985   | 8.834855    | 9.3339015   | 9.1458805   | 8.968691    | 9.275882    |
| "Timm8a2"  | 3.0532417   | 3.0744383   | 2.8781912   | 2.951489    | 3.103891    | 3.1032474   | 3.0091336   | 3.1153698   |
| "Timm8b"   | 9.256067    | 9.454937    | 9.806218    | 9.584353    | 9.512431    | 9.686262    | 9.574008    | 9.592209    |
| "Timm9"    | 5.6162844   | 6.36818985  | 4.39696555  | 4.61728965  | 6.3570125   | 6.69429165  | 5.669855    | 6.12797885  |
| "Timp2"    | 4.90527616  | 5.14306336  | 5.14470874  | 5.3192262   | 5.2982074   | 4.71613232  | 4.9509391   | 4.83058058  |
| "Timp3"    | 6.176232367 | 6.2104798   | 6.014588133 | 5.923320333 | 6.5346911   | 6.669665333 | 5.963679767 | 5.983062733 |
| "Timp4"    | 2.8021163   | 3.27848545  | 2.7139838   | 2.7428616   | 3.09772015  | 2.80366995  | 2.783487    | 2.7907585   |
| "Tinag1"   | 4.90333     | 4.749503    | 5.1386137   | 5.3474107   | 4.639921    | 4.9698315   | 5.4031057   | 4.7748823   |
| "Tinf2"    | 5.730829    | 5.790926    | 5.627331    | 5.8966103   | 5.464106    | 5.623794    | 5.718294    | 5.7281723   |
| "Tiparp"   | 10.57425967 | 6.731681833 | 7.2701935   | 6.222386767 | 6.107590067 | 6.667100233 | 5.8044685   | 6.2281119   |
| "Tipin"    | 6.613797    | 7.397639    | 6.9918513   | 6.634367    | 6.927057    | 7.0930305   | 7.0247636   | 7.0809603   |
| "Tipri"    | 9.99203725  | 8.13302     | 7.42208625  | 7.3763093   | 7.483883    | 7.75672835  | 7.43070295  | 7.6888287   |

|            |             |             |             |             |             |             |             |             |
|------------|-------------|-------------|-------------|-------------|-------------|-------------|-------------|-------------|
| "Tirap"    | 6.62317205  | 6.52825525  | 7.569044    | 7.265415    | 7.2691705   | 7.080103    | 7.207524    | 7.6106633   |
| "Tjap1"    | 3.8879352   | 3.078312    | 3.230866    | 3.251097    | 4.0098357   | 3.2715323   | 3.282703    | 3.2640753   |
| "Tjp1"     | 9.296041    | 8.878318    | 9.054267    | 9.100301    | 8.981266    | 9.261875    | 9.202276    | 9.111119    |
| "Tjp2"     | 5.186455225 | 5.631157175 | 6.256890225 | 5.55454795  | 5.684718425 | 5.488109875 | 6.1506558   | 5.801920325 |
| "Tjp3"     | 5.011922    | 5.032608    | 7.141793    | 5.994112    | 5.614201    | 5.682027    | 6.237228    | 5.7518644   |
| "Tk1"      | 4.022536    | 4.5345964   | 5.76806     | 6.352586    | 4.3502088   | 5.0856137   | 6.0157166   | 6.0985      |
| "Tk2"      | 8.093369    | 8.291342    | 7.4049554   | 7.7654657   | 7.7991195   | 7.448713    | 7.90495     | 7.791599    |
| "Tkt"      | 11.0236815  | 11.2149685  | 11.5376675  | 11.3122505  | 11.3837975  | 10.1600815  | 11.1210945  | 11.3069145  |
| "Tktl1"    | 2.5786924   | 2.5786924   | 2.4832385   | 2.534372    | 2.6044476   | 2.6007042   | 2.5929718   | 2.6013353   |
| "Tlcd1"    | 5.979406933 | 6.107653967 | 5.4242256   | 6.2306248   | 5.957591933 | 6.121731967 | 5.8737678   | 6.212696833 |
| "Tlcd2"    | 7.282476    | 7.676787    | 10.305197   | 10.208662   | 8.509327    | 7.9812374   | 10.796481   | 10.4200325  |
| "Tle1"     | 9.35443425  | 9.03942275  | 8.27692465  | 8.6694895   | 9.182774    | 9.543029    | 8.92962     | 9.0419265   |
| "Tle2"     | 3.2608418   | 3.0812848   | 3.3538265   | 3.2476141   | 3.3110547   | 3.3057075   | 3.3142948   | 3.7917147   |
| "Tle3"     | 3.944257467 | 3.947057833 | 4.287476167 | 4.2930878   | 4.131362    | 3.864452133 | 4.235153867 | 4.231943667 |
| "Tle4"     | 4.726923    | 4.54554525  | 4.83232655  | 4.7540376   | 4.84925905  | 4.6311942   | 4.74271585  | 4.896167    |
| "Tle6"     | 2.2274833   | 2.194093    | 2.5435858   | 2.2913015   | 2.2308326   | 2.3571277   | 2.2220829   | 2.2079356   |
| "Tlk2"     | 6.558442533 | 6.493405867 | 5.522342867 | 5.530234    | 5.700644233 | 5.9065564   | 5.727945433 | 5.687577567 |
| "Tll1"     | 2.4426503   | 2.415195    | 2.3379161   | 2.383105    | 2.4402182   | 2.4375327   | 2.4321716   | 2.4376338   |
| "Tln1"     | 5.2758643   | 5.08472695  | 5.12436555  | 5.4078868   | 5.5197745   | 5.16338615  | 5.6521935   | 5.4544747   |
| "Tlr1"     | 4.9820294   | 4.338753    | 7.066679    | 6.338017    | 4.9707594   | 5.176306    | 5.488793    | 5.482835    |
| "Tlr2"     | 7.0224357   | 4.4437566   | 8.893615    | 8.78078     | 4.8355193   | 4.20866     | 5.6819406   | 6.0880804   |
| "Tlr3"     | 3.87984365  | 3.853042    | 4.5079335   | 4.74584105  | 4.12341775  | 3.8828869   | 4.26520685  | 4.4262163   |
| "Tlr4"     | 3.1332575   | 3.25518275  | 5.57700175  | 4.27005385  | 3.6383629   | 3.7525935   | 4.3416804   | 3.54864825  |
| "Tlr5"     | 1.8548198   | 2.7585664   | 1.7710915   | 1.9019761   | 2.0546186   | 1.9260218   | 1.9389942   | 1.919684    |
| "Tlr6"     | 2.377622    | 2.3433478   | 2.5880313   | 2.3296666   | 2.327062    | 2.3548431   | 2.3718867   | 2.345199    |
| "Tlr7"     | 3.7884493   | 3.406739033 | 3.636444567 | 3.4325504   | 3.447773033 | 3.608607533 | 3.284939533 | 3.179753167 |
| "Tm2d1"    | 5.8546138   | 5.8270245   | 5.6749991   | 5.9046615   | 5.661437    | 5.8055208   | 5.874926    | 5.6616813   |
| "Tm2d2"    | 8.66563725  | 8.811785513 | 8.592525325 | 8.907869688 | 8.68478465  | 8.756838663 | 8.809139388 | 8.608812625 |
| "Tm2d3"    | 7.6531687   | 7.892236    | 8.019245    | 7.6114864   | 7.696793    | 8.336334    | 7.9661217   | 8.291206    |
| "Tm4sf1"   | 4.61190105  | 4.37599615  | 5.4097309   | 5.2580788   | 4.8510205   | 4.8595928   | 5.07451995  | 4.88960625  |
| "Tm4sf20"  | 2.65903     | 2.6221907   | 2.5829673   | 2.559504    | 2.644189    | 2.635018    | 2.6061056   | 2.6398103   |
| "Tm4sf4"   | 12.002156   | 10.675417   | 11.434122   | 11.03637    | 11.13064    | 11.351541   | 11.153675   | 10.898332   |
| "Tm6sf1"   | 7.6009455   | 5.9599497   | 7.22436025  | 6.55754545  | 6.3029808   | 7.15579935  | 6.5820483   | 5.5565053   |
| "Tm6sf2"   | 6.777028    | 7.142478    | 7.980995    | 7.372711    | 7.964191    | 7.5448446   | 7.692689    | 7.288462    |
| "Tm7sf2"   | 10.391142   | 10.885538   | 10.820638   | 10.608807   | 9.670983    | 8.840411    | 9.446333    | 10.591108   |
| "Tm7sf3"   | 8.231623567 | 8.334750433 | 8.475007667 | 8.559811233 | 8.273693133 | 8.294243333 | 8.678361633 | 8.520365233 |
| "Tm9sf2"   | 11.169843   | 10.990991   | 10.94933267 | 10.8996233  | 11.01370633 | 11.08865367 | 11.05155    | 10.88506517 |
| "Tm9sf3"   | 7.509568367 | 7.5880034   | 7.5456425   | 7.579979867 | 7.6428011   | 7.542608067 | 7.639909933 | 7.6735889   |
| "Tm9sf4"   | 5.7536715   | 5.7051816   | 6.2549449   | 5.85421015  | 5.8536887   | 5.8794584   | 5.786162    | 5.7882782   |
| "Tmbim1"   | 8.688191    | 9.023875    | 8.546121    | 8.830034    | 8.5715275   | 8.877858    | 8.661405    | 8.544948    |
| "Tmbim4"   | 9.186255    | 9.579246    | 9.401812    | 9.580715    | 9.516993    | 9.507996    | 9.337051    | 9.441664    |
| "Tmbim6"   | 12.656495   | 12.705427   | 12.599388   | 13.042508   | 13.006097   | 12.563566   | 13.011335   | 13.103508   |
| "Tmc4"     | 2.725459    | 2.7063482   | 2.68883     | 2.6910324   | 2.7252042   | 2.7157938   | 2.8328657   | 2.7111127   |
| "Tmc6"     | 6.5802      | 5.870432    | 6.683093    | 6.8820467   | 6.5565414   | 6.3538637   | 6.8359294   | 6.4369006   |
| "Tmcc2"    | 2.8760407   | 2.5515569   | 2.53326295  | 3.4049295   | 3.11550595  | 3.0918379   | 2.88067085  | 3.10281835  |
| "Tmco1"    | 10.843406   | 10.875847   | 10.72279    | 11.15394    | 10.976088   | 10.820337   | 11.231207   | 11.12533    |
| "Tmco3"    | 4.1172805   | 3.853146    | 4.3296027   | 4.0684614   | 3.4139874   | 4.277143    | 4.223947    | 4.143986    |
| "Tmco4"    | 3.424883    | 3.394412    | 3.380451    | 3.5364342   | 3.4201236   | 3.4202726   | 3.662818    | 3.6972148   |
| "Tmco6"    | 5.5848503   | 4.2651887   | 5.570757    | 4.7673707   | 3.2385383   | 3.8506536   | 3.8081923   | 4.029141    |
| "Tmed1"    | 5.3854766   | 6.167141    | 5.956828    | 6.1902876   | 5.9536557   | 6.498571    | 6.051093    | 6.2206454   |
| "Tmed10"   | 9.118708    | 9.380366    | 9.491501    | 9.261108    | 9.712738    | 8.973756    | 9.173782    | 8.959193    |
| "Tmed11"   | 2.78188     | 2.7798681   | 2.6552494   | 2.7671466   | 2.869006    | 2.8169458   | 2.755995    | 2.8045273   |
| "Tmed2"    | 10.56883505 | 10.701736   | 10.6733825  | 10.546141   | 10.82385083 | 10.54542587 | 10.6119345  | 10.638567   |
| "Tmed3"    | 7.7804036   | 7.969268    | 8.155027    | 7.7153964   | 8.466889    | 7.575855    | 7.8514504   | 7.6973944   |
| "Tmed4"    | 6.20761765  | 6.7813864   | 6.3684751   | 6.2627223   | 6.450441    | 6.5479277   | 6.1974336   | 6.35026725  |
| "Tmed5"    | 10.9518595  | 11.2952745  | 9.726844    | 9.8725675   | 10.9493115  | 11.2816715  | 10.6023215  | 10.4982425  |
| "Tmed7"    | 8.31775825  | 8.4639725   | 8.231358625 | 8.0848038   | 8.3503482   | 8.2035041   | 8.2758975   | 8.1002851   |
| "Tmed9"    | 9.610367    | 9.3455255   | 9.3658295   | 9.2807785   | 9.7019265   | 9.4691625   | 9.0725015   | 9.328738    |
| "Tmeff1"   | 3.1574848   | 3.1413965   | 2.9938753   | 3.068291    | 3.2096705   | 3.1548302   | 3.1646996   | 3.2192695   |
| "Tmeff2"   | 2.1770267   | 2.1678195   | 3.7327652   | 2.139591    | 2.179381    | 2.189136    | 2.158721    | 2.168789    |
| "Tmem100"  | 5.6632323   | 3.1862206   | 2.9278846   | 3.0453508   | 4.235783    | 3.5270457   | 3.0539522   | 3.1766016   |
| "Tmem101"  | 4.296727    | 4.3023086   | 4.5135703   | 4.990989    | 4.41591     | 4.890099    | 5.4093227   | 5.1024675   |
| "Tmem106a" | 6.0779667   | 4.4595084   | 6.6701717   | 6.3946915   | 4.94039     | 5.2829514   | 6.066108    | 5.958786    |
| "Tmem106b" | 8.729493    | 8.664365    | 8.358857    | 8.151635    | 7.924335    | 9.168521    | 8.00396     | 8.385142    |
| "Tmem106c" | 3.23960985  | 3.2770623   | 3.190302    | 3.48872235  | 3.3693166   | 3.18231215  | 3.4753455   | 3.3597296   |
| "Tmem109"  | 8.508268    | 8.1427959   | 8.033768    | 8.183633467 | 8.226018    | 8.282788467 | 8.473612    | 8.229058467 |
| "Tmem11"   | 9.363599    | 9.222636    | 8.208958    | 8.591526    | 8.706875    | 8.973298    | 8.280802    | 8.543455    |
| "Tmem110"  | 3.0619462   | 3.5481575   | 3.1943793   | 2.994429    | 3.022969    | 3.1225374   | 3.1687105   | 3.076009    |
| "Tmem111"  | 10.170693   | 10.198003   | 9.975846    | 10.227343   | 10.161063   | 10.324372   | 10.132637   | 10.257366   |
| "Tmem115"  | 8.3324      | 8.123198    | 7.353324    | 7.7612867   | 8.005986    | 8.284823    | 7.6199365   | 7.9190903   |
| "Tmem116"  | 2.5770178   | 2.5486584   | 2.4578538   | 2.497743    | 2.5803552   | 2.6256166   | 2.547249    | 2.5716343   |
| "Tmem120b" | 2.5859625   | 2.4461405   | 2.4191408   | 2.3320642   | 2.4701803   | 2.5771906   | 2.3682828   | 2.4532764   |
| "Tmem123"  | 8.955403    | 8.0794745   | 8.2638525   | 8.26038515  | 8.132015    | 7.849174    | 8.607189    | 8.164877    |
| "Tmem126a" | 10.611292   | 10.793192   | 10.857173   | 11.000591   | 10.915422   | 10.966354   | 11.060093   | 11.022854   |
| "Tmem128"  | 8.738677    | 8.428663    | 8.683893    | 8.575975    | 8.472923    | 8.655607    | 8.683244    | 8.374556    |
| "Tmem129"  | 7.3106737   | 7.152607    | 7.0422735   | 7.0104027   | 7.174897    | 7.273415    | 7.1519685   | 7.0841317   |
| "Tmem131"  | 8.844175    | 9.094652    | 8.536888    | 8.729994    | 8.959504    | 9.573471    | 8.597871    | 8.634642    |
| "Tmem132a" | 2.3586285   | 2.3288271   | 2.3197076   | 2.2919433   | 2.353603    | 2.3466856   | 2.3225534   | 2.3858867   |
| "Tmem134"  | 6.5025395   | 7.24218235  | 6.7037327   | 6.9140785   | 6.5449102   | 6.4801977   | 6.554996    | 6.70137675  |
| "Tmem135"  | 6.8319257   | 7.55246175  | 6.91479835  | 7.1525965   | 6.7503818   | 7.3880293   | 7.54831635  | 7.17023065  |
| "Tmem140"  | 9.788998    | 8.118953    | 8.756761    | 9.08714     | 8.282171    | 8.6647      | 8.644989    | 8.445959    |

|            |             |             |             |             |             |             |             |             |
|------------|-------------|-------------|-------------|-------------|-------------|-------------|-------------|-------------|
| "Tmem141"  | 7.212743    | 7.886665    | 8.3899405   | 6.8878935   | 8.08938365  | 8.1603225   | 8.193415    | 8.0310085   |
| "Tmem143"  | 3.213006    | 3.187252    | 3.0484471   | 3.1820867   | 3.2149096   | 3.454709    | 3.0117412   | 3.210434    |
| "Tmem144"  | 2.713303833 | 3.047020167 | 3.271562733 | 3.320855433 | 3.098727233 | 2.783857033 | 3.500920067 | 3.455040033 |
| "Tmem147"  | 9.369163    | 10.210123   | 9.853667    | 9.965046    | 10.10425    | 10.327805   | 10.026421   | 10.430461   |
| "Tmem149"  | 4.6303463   | 4.5859537   | 4.4720783   | 4.58302     | 4.641775    | 4.606049    | 4.597059    | 4.737407    |
| "Tmem14c"  | 10.508983   | 10.762271   | 11.316453   | 11.107369   | 10.764353   | 10.803978   | 10.867992   | 11.032645   |
| "Tmem150a" | 6.49925     | 7.280898    | 7.956654    | 7.8073573   | 6.937207    | 8.036358    | 7.649636    | 8.097001    |
| "Tmem151b" | 2.3528454   | 2.3654416   | 2.3244574   | 2.3233507   | 2.3482125   | 2.3451095   | 2.3177874   | 2.3354945   |
| "Tmem158"  | 2.686962    | 2.6149282   | 2.6338313   | 2.6203494   | 2.671422    | 2.723036    | 2.8031013   | 2.6635914   |
| "Tmem159"  | 3.778542    | 3.7085547   | 3.6846073   | 3.6433709   | 4.0592947   | 3.7231228   | 3.7430105   | 3.7132802   |
| "Tmem160"  | 7.1325407   | 7.4432893   | 7.9184885   | 7.6450315   | 7.372455    | 7.333228    | 7.4641366   | 7.5265756   |
| "Tmem161a" | 5.15531185  | 5.1655204   | 4.78263855  | 4.91232555  | 4.90313115  | 5.3698082   | 4.90537575  | 4.99845065  |
| "Tmem163"  | 2.72851     | 2.704162    | 2.6585996   | 2.6439779   | 2.7320406   | 2.7260816   | 2.7053823   | 2.7120957   |
| "Tmem165"  | 7.3692975   | 7.299562    | 8.516429    | 7.782658    | 7.576803    | 7.2658124   | 7.9189577   | 7.678829    |
| "Tmem167"  | 7.680438075 | 8.259804025 | 8.138989675 | 7.96005705  | 8.0799081   | 7.780016625 | 7.702916125 | 7.6010669   |
| "Tmem168"  | 7.0014833   | 6.905544367 | 6.699221933 | 6.8126498   | 7.0630311   | 7.041419767 | 7.400087033 | 7.019349533 |
| "Tmem173"  | 3.3418603   | 2.5533702   | 3.2334743   | 2.579819    | 2.6091955   | 2.5089176   | 2.6075027   | 2.613718    |
| "Tmem175"  | 2.5667927   | 2.632327    | 2.5382802   | 2.5455184   | 2.523829    | 2.6628726   | 2.590986    | 2.571283    |
| "Tmem176a" | 11.9391425  | 11.199673   | 12.26940225 | 12.018642   | 10.9505465  | 10.7329455  | 10.6570135  | 11.058579   |
| "Tmem176b" | 12.29367    | 11.730878   | 12.583642   | 12.15731    | 11.423733   | 11.28043    | 11.092937   | 11.489289   |
| "Tmem179b" | 4.519702333 | 4.622539333 | 4.6228578   | 4.842467133 | 4.503633633 | 4.8781251   | 4.6642716   | 4.924983333 |
| "Tmem183a" | 8.171330667 | 8.6200869   | 8.136063667 | 8.3170038   | 7.902881667 | 8.074347    | 8.022256567 | 8.467346667 |
| "Tmem184a" | 2.2993147   | 2.7149777   | 2.9768848   | 3.2724078   | 2.5176353   | 2.5110955   | 3.032508    | 2.6728868   |
| "Tmem184b" | 2.802577    | 2.7572758   | 2.743955    | 2.7504904   | 2.7780328   | 2.7790308   | 2.9806182   | 3.055464    |
| "Tmem184c" | 8.172241    | 8.770104    | 8.195496    | 8.280965    | 8.953355    | 8.860799    | 9.086409    | 8.351441    |
| "Tmem185b" | 7.7543893   | 7.195336    | 7.4349427   | 7.4127507   | 7.160449    | 7.607311    | 7.236591    | 7.209938    |
| "Tmem186"  | 3.0728504   | 3.305903033 | 2.9499633   | 3.081175567 | 3.7279231   | 3.356628167 | 3.523219433 | 3.392208667 |
| "Tmem188"  | 8.527577    | 8.456356    | 8.944298    | 8.7371      | 8.4062105   | 8.611281    | 8.866079    | 8.5688025   |
| "Tmem189"  | 4.7043333   | 5.46180435  | 4.29047965  | 4.8816387   | 5.10417915  | 4.94650565  | 4.7057444   | 4.73140865  |
| "Tmem19"   | 7.572230467 | 7.7559316   | 8.117893167 | 9.103216667 | 8.162611567 | 7.778596467 | 8.3754958   | 8.864932667 |
| "Tmem191c" | 3.214407467 | 3.211099133 | 2.948213467 | 3.112405233 | 3.4148149   | 3.419767167 | 3.306105533 | 3.297704333 |
| "Tmem192"  | 6.655016    | 7.554341    | 7.290796    | 7.064516    | 6.6254478   | 7.0066867   | 6.9152226   | 7.0033345   |
| "Tmem199"  | 6.428211    | 6.5450745   | 5.8964148   | 5.760457    | 6.57444     | 6.871999    | 6.614331    | 6.6011605   |
| "Tmem2"    | 7.9179018   | 7.3848205   | 7.6421564   | 7.2316362   | 8.0944905   | 8.0151655   | 7.92601275  | 7.29356185  |
| "Tmem203"  | 6.857663    | 7.7295814   | 6.855201    | 7.013204    | 7.3009233   | 7.4450665   | 7.148689    | 7.0961657   |
| "Tmem205"  | 12.236483   | 12.6295395  | 12.877702   | 12.996859   | 12.666759   | 12.283402   | 12.611507   | 12.719244   |
| "Tmem206"  | 4.407211125 | 4.3352191   | 4.719754175 | 4.69391025  | 4.5836881   | 4.457214325 | 4.60379565  | 4.53364675  |
| "Tmem208"  | 8.748744    | 9.323412    | 9.225523    | 9.415099    | 9.334993    | 9.500819    | 9.361103    | 9.405195    |
| "Tmem209"  | 4.3953153   | 4.7081238   | 4.81650795  | 5.020064    | 4.62276615  | 5.0616253   | 4.9221842   | 4.5385833   |
| "Tmem214"  | 6.1664113   | 6.4341223   | 6.3087636   | 6.12758165  | 6.90146975  | 6.3754687   | 6.1972512   | 6.29742465  |
| "Tmem216"  | 4.497061    | 4.5539175   | 4.5441028   | 4.7050934   | 4.58442285  | 4.6034081   | 4.4962625   | 4.6487014   |
| "Tmem218"  | 5.029478    | 4.78707     | 6.700521    | 6.21222     | 4.71036     | 5.0319705   | 6.8014536   | 6.094119    |
| "Tmem219"  | 8.098085    | 8.80253     | 8.081373    | 8.105936    | 8.248634    | 8.238756    | 8.100126    | 8.404397    |
| "Tmem222"  | 5.976426    | 6.3133144   | 6.2376103   | 6.0293446   | 6.212518    | 6.0501413   | 5.899261    | 5.912743    |
| "Tmem223"  | 7.740992    | 8.341079    | 8.284551    | 8.269483    | 8.389473    | 8.428475    | 7.981529    | 8.145964    |
| "Tmem229b" | 2.4426384   | 2.4064314   | 2.3817372   | 2.4027562   | 2.4289296   | 2.4364693   | 2.433943    | 2.4394925   |
| "Tmem234"  | 9.298206    | 9.577958    | 9.145747    | 9.378977    | 9.270594    | 9.264286    | 8.974379    | 9.135628    |
| "Tmem242"  | 8.535822    | 8.703179    | 9.01712     | 9.17579     | 8.717089    | 8.394264    | 8.931696    | 8.9730215   |
| "Tmem245"  | 6.0159636   | 6.5680285   | 5.8726044   | 6.3975587   | 6.4581647   | 6.363673    | 6.7989287   | 6.5663147   |
| "Tmem246"  | 2.480361    | 2.3857577   | 2.2759435   | 2.362733    | 2.4069448   | 2.3812084   | 2.384098    | 2.3743608   |
| "Tmem27"   | 2.89606     | 2.8727098   | 2.7488942   | 2.8285885   | 2.9257092   | 2.9085753   | 2.8682055   | 2.9076416   |
| "Tmem30a"  | 9.804409325 | 10.117681   | 9.7869895   | 9.834178    | 9.63217275  | 9.928934875 | 10.46018613 | 10.23459275 |
| "Tmem30b"  | 10.380803   | 10.983337   | 10.169564   | 10.155759   | 10.088234   | 10.451734   | 10.471007   | 10.635267   |
| "Tmem33"   | 7.203036    | 7.260864875 | 6.9902788   | 7.102792225 | 7.142158125 | 7.50797845  | 7.318043    | 7.243583525 |
| "Tmem35"   | 2.8034215   | 2.781703    | 2.7010458   | 2.7649548   | 2.8231533   | 2.794483    | 2.7394652   | 2.7880766   |
| "Tmem37"   | 8.840367    | 9.646054    | 9.233867    | 8.57799     | 9.168       | 9.630576    | 8.789685    | 8.28748     |
| "Tmem38a"  | 2.5486586   | 2.5233843   | 2.4413562   | 2.4816844   | 2.6390536   | 2.5662482   | 2.513407    | 2.5404215   |
| "Tmem38b"  | 7.1938475   | 7.098232    | 7.0950264   | 7.053094333 | 7.281182033 | 7.149599533 | 6.989347067 | 7.063894667 |
| "Tmem39a"  | 5.871654    | 6.0243106   | 6.831655    | 5.9675436   | 6.7230816   | 5.9066205   | 6.046805    | 6.2974205   |
| "Tmem40"   | 3.037842    | 2.9989657   | 2.9579754   | 2.9810674   | 3.020641    | 3.0615563   | 3.0119548   | 3.0063791   |
| "Tmem41a"  | 7.341205    | 7.0659547   | 7.086689    | 6.6947265   | 7.3713837   | 6.975345    | 6.8038607   | 7.0710254   |
| "Tmem41b"  | 6.71200244  | 7.16454456  | 7.0099666   | 6.95801936  | 7.02151102  | 6.94478846  | 6.9426319   | 7.32840112  |
| "Tmem42"   | 6.9191737   | 7.8736954   | 7.08123     | 7.848874    | 7.449287    | 7.5408897   | 7.2615094   | 7.694945    |
| "Tmem43"   | 3.6014695   | 3.8088412   | 3.549701    | 3.56067     | 3.5225396   | 3.6271484   | 3.597528    | 3.5701985   |
| "Tmem45b"  | 2.5420973   | 2.5346391   | 2.4208474   | 2.458806    | 2.5312016   | 2.588677    | 2.513769    | 2.5504403   |
| "Tmem47"   | 6.0026315   | 5.22602525  | 5.139431    | 5.04732955  | 5.5179156   | 5.09270885  | 5.43477     | 4.98095165  |
| "Tmem48"   | 2.77573675  | 2.84084515  | 3.0436227   | 3.34722925  | 3.17176375  | 3.01048255  | 3.38334565  | 3.3652178   |
| "Tmem5"    | 8.879043    | 8.862252    | 7.9401145   | 8.020152    | 8.352692    | 7.69507     | 8.128685    | 8.341293    |
| "Tmem50b"  | 6.2589717   | 5.4538074   | 6.3486547   | 6.3107314   | 6.3828278   | 5.9099803   | 5.933245    | 6.1472077   |
| "Tmem51"   | 6.9166985   | 5.8607063   | 8.318849    | 7.4582086   | 6.465063    | 6.961153    | 7.2777257   | 7.8434825   |
| "Tmem53"   | 7.235929    | 7.1421466   | 8.376194    | 7.990059    | 7.573054    | 7.3709035   | 7.9414496   | 7.79388     |
| "Tmem55a"  | 7.9690733   | 8.135258    | 8.573624    | 8.877656    | 8.393337    | 8.438288    | 8.687765    | 8.651637    |
| "Tmem56"   | 11.022939   | 11.809533   | 10.8125105  | 10.886537   | 11.74806    | 12.027941   | 12.281037   | 11.544951   |
| "Tmem60"   | 8.179301    | 8.333497    | 8.190483    | 8.54871     | 7.903094    | 8.3819895   | 8.37514     | 8.511618    |
| "Tmem62"   | 7.723447    | 8.251654    | 7.7960176   | 7.429579    | 6.971327    | 7.3885417   | 6.441491    | 6.802164    |
| "Tmem63a"  | 5.315411    | 5.522719    | 5.9753537   | 5.7544675   | 5.9847608   | 5.6078944   | 5.9331656   | 5.549687    |
| "Tmem63b"  | 5.929184    | 7.0388603   | 6.867245    | 7.056184    | 7.475045    | 7.606245    | 7.1740885   | 7.463946    |
| "Tmem66"   | 11.911583   | 11.80578    | 11.967458   | 12.047894   | 11.843197   | 11.918606   | 11.583595   | 11.783976   |
| "Tmem68"   | 8.016625    | 7.1626654   | 7.4030786   | 7.460626    | 7.11915     | 7.6279044   | 7.2910113   | 7.610198    |
| "Tmem70"   | 8.24338     | 8.32087     | 8.397407    | 8.219727    | 8.341416    | 8.463195    | 8.89445     | 8.225748    |
| "Tmem71"   | 5.930091    | 5.392516    | 5.5082054   | 5.709449    | 5.3411465   | 5.6715407   | 5.590785    | 5.5637894   |

|             |             |             |             |             |             |             |             |             |
|-------------|-------------|-------------|-------------|-------------|-------------|-------------|-------------|-------------|
| "Tmem8"     | 4.65152955  | 4.27917525  | 5.08682035  | 4.4876001   | 4.2922676   | 4.34083755  | 4.20800135  | 4.3059249   |
| "Tmem80"    | 4.7207804   | 5.030969    | 4.653069    | 5.18439     | 5.051971    | 5.0075784   | 5.3835926   | 5.512648    |
| "Tmem82"    | 5.3823504   | 6.151856    | 4.8701463   | 4.775281    | 5.8079495   | 5.026459    | 5.016584    | 4.8639407   |
| "Tmem85"    | 8.734775    | 9.1143705   | 8.48635965  | 8.6680415   | 8.81059925  | 9.0012654   | 8.7314905   | 8.7642317   |
| "Tmem87a"   | 2.768516    | 2.74412     | 2.976678    | 2.7279272   | 2.578225    | 2.740453    | 2.7583778   | 2.7413008   |
| "Tmem9"     | 4.607871    | 5.364767    | 5.1458635   | 5.427529    | 5.963302    | 5.451738    | 5.7778177   | 5.918694    |
| "Tmem93"    | 9.6145995   | 10.0200245  | 9.39271725  | 9.6495955   | 9.8308905   | 10.0712925  | 9.6707055   | 9.771714    |
| "Tmem97"    | 9.083345    | 9.197864    | 9.553784    | 9.186156    | 8.282034    | 7.42308     | 8.461459    | 8.909069    |
| "Tmem98"    | 4.8509073   | 4.5934086   | 4.9274926   | 4.9734726   | 4.9294696   | 4.2051153   | 5.954094    | 5.365245    |
| "Tmem9b"    | 7.56858175  | 7.78436525  | 7.945907    | 7.7304275   | 7.483319    | 7.50030115  | 7.5734835   | 7.3125753   |
| "Tmigd1"    | 3.0221152   | 3.0064778   | 2.84862     | 2.9368398   | 3.0288794   | 3.0607257   | 2.971631    | 3.0872986   |
| "Tmlhe"     | 4.9361508   | 4.597413367 | 5.249878967 | 6.0490036   | 5.572275267 | 5.246624833 | 6.531671233 | 5.620062367 |
| "Tmod1"     | 3.2662961   | 3.2451553   | 2.9174535   | 3.2510693   | 3.29308     | 3.280088    | 3.1252515   | 3.3692324   |
| "Tmod2"     | 2.44761665  | 2.41934585  | 2.35455845  | 2.3805791   | 2.44332815  | 2.448182    | 2.43101095  | 2.4431094   |
| "Tmod3"     | 6.528961    | 5.6825266   | 6.704590933 | 6.163906133 | 6.2324842   | 6.2920335   | 6.740563033 | 6.185155567 |
| "Tmod4"     | 2.390328    | 2.364161    | 2.340832    | 2.3402598   | 2.3852491   | 2.3801134   | 2.3796911   | 2.3736477   |
| "Tmpo"      | 4.76234985  | 4.766658375 | 5.0941358   | 4.722813825 | 4.7275063   | 4.80505355  | 4.9680798   | 4.904658125 |
| "Tmpe"      | 3.8749435   | 4.3195906   | 4.4189262   | 4.343407    | 4.3808684   | 4.3724017   | 4.384947    | 4.5483418   |
| "Tmprss1d"  | 2.9863715   | 2.970593    | 2.8759747   | 2.9217215   | 3.0218668   | 3.0251744   | 2.9604306   | 3.0191479   |
| "Tmprss2"   | 6.9749287   | 6.5546291   | 7.31824725  | 5.78615485  | 5.03733015  | 6.10056255  | 6.075715    | 4.13187195  |
| "Tmprss4"   | 2.4417782   | 2.4320118   | 2.3867157   | 2.3801165   | 2.4754853   | 2.4698977   | 2.430307    | 2.4360044   |
| "Tmprss5"   | 2.6056962   | 2.5709496   | 2.4898534   | 2.5559886   | 2.584517    | 2.58771     | 2.577239    | 2.6032476   |
| "Tmsb10"    | 5.81240362  | 4.84681908  | 6.6046284   | 6.07191566  | 5.39389212  | 5.17986914  | 6.0542932   | 5.81383256  |
| "Tmsb4x"    | 13.672967   | 11.975617   | 14.02715    | 13.553789   | 13.009462   | 12.625609   | 13.622345   | 13.078185   |
| "Tmtc4"     | 4.03917285  | 3.9206229   | 4.8295767   | 4.7754125   | 4.22432625  | 4.3031793   | 4.8811265   | 5.06426435  |
| "Tmub2"     | 8.733463    | 8.596387    | 8.502714    | 8.814462    | 8.649893    | 8.933321    | 8.657162    | 8.688805    |
| "Tmx1"      | 9.9333825   | 9.6295405   | 10.2685635  | 9.9521925   | 9.922324    | 9.913201    | 9.934793    | 9.8691885   |
| "Tmx2"      | 7.685618    | 7.9183767   | 8.8552255   | 8.6855925   | 8.09541315  | 7.82519535  | 8.967835    | 8.633863    |
| "Tn"        | 2.4350905   | 2.3985708   | 2.3644068   | 2.3845623   | 2.5022783   | 2.4104304   | 2.4225414   | 2.410606    |
| "Tnfaip1"   | 8.040708867 | 7.149226333 | 7.325984    | 7.214098733 | 6.968045333 | 7.325808667 | 7.352184867 | 6.9864735   |
| "Tnfaip2"   | 8.318896    | 6.6274483   | 8.6277453   | 8.320345    | 6.72907775  | 6.6975505   | 7.44277735  | 7.15229965  |
| "Tnfaip6"   | 3.799103    | 3.1385214   | 3.0158916   | 3.0869472   | 3.1673925   | 3.258662    | 3.1341171   | 3.3285308   |
| "Tnfaip8"   | 6.886935    | 4.89951     | 7.2382517   | 6.1617565   | 5.2326155   | 4.915936    | 5.8777122   | 5.2881265   |
| "Tnfaip81"  | 5.683187    | 6.8412743   | 6.681921    | 6.4122148   | 6.941557    | 6.2891717   | 7.249473    | 7.046864    |
| "Tnfrsf11a" | 2.5387724   | 2.51994035  | 2.5094091   | 2.4661287   | 2.5483235   | 2.55789935  | 2.5105407   | 2.5674324   |
| "Tnfrsf11b" | 3.12770315  | 3.19620335  | 3.1765616   | 3.193331    | 3.2612655   | 3.25586905  | 3.9481916   | 3.31429955  |
| "Tnfrsf12a" | 7.525611    | 5.237202    | 3.6732087   | 3.92232415  | 4.3799516   | 5.65473295  | 4.03073835  | 4.7061747   |
| "Tnfrsf13b" | 2.2459006   | 2.1993673   | 2.8295462   | 2.196404    | 2.2341194   | 2.22101     | 2.2361012   | 2.219175    |
| "Tnfrsf13c" | 3.2411041   | 3.2670398   | 3.1781461   | 3.233307    | 3.442144    | 3.2855875   | 3.269039    | 3.280095    |
| "Tnfrsf19"  | 2.992367567 | 2.975026867 | 2.890087067 | 3.21244     | 3.0353138   | 2.731667967 | 3.2699674   | 3.324507567 |
| "Tnfrsf1a"  | 9.685674    | 8.764937    | 9.482451    | 8.900835    | 8.770569    | 8.58536     | 8.41664     | 8.46868     |
| "Tnfrsf1b"  | 5.83844975  | 4.90440885  | 5.1989485   | 4.8233849   | 4.6135509   | 4.7773223   | 4.699723    | 4.4227689   |
| "Tnfrsf21"  | 4.48180685  | 2.7319585   | 4.1845407   | 3.08942715  | 3.1200197   | 2.7580526   | 3.2056311   | 2.9599574   |
| "Tnfrsf22"  | 2.8440404   | 2.8251708   | 2.748402    | 2.7466364   | 3.0070004   | 2.8268867   | 2.7923748   | 2.8640144   |
| "Tnfrsf9"   | 2.3738763   | 2.34257     | 2.2269096   | 2.302156    | 2.7597075   | 2.3533537   | 2.3635108   | 2.3809216   |
| "Tnfsf11"   | 2.5349069   | 2.5110755   | 2.400931    | 2.480373    | 2.538513    | 2.5478213   | 2.505762    | 2.5470243   |
| "Tnfsf13b"  | 2.347967    | 2.31559     | 2.8106115   | 2.2906408   | 2.3379276   | 2.328711    | 2.3455129   | 2.3251882   |
| "Tnfsf8"    | 2.4809198   | 2.4687018   | 2.5627842   | 2.4426236   | 2.5143538   | 2.546933    | 2.4619126   | 2.4867163   |
| "Tnip1"     | 8.017142    | 6.4908867   | 7.164852    | 7.1609216   | 6.035209    | 6.8063054   | 6.3597608   | 6.0987997   |
| "Tnip2"     | 5.295957    | 4.095711    | 4.260286    | 4.223314    | 4.110707    | 3.7715664   | 4.3279123   | 4.0344167   |
| "Tnk1"      | 2.2949598   | 2.2672398   | 2.1924927   | 2.2337427   | 2.2909393   | 2.2748806   | 2.2847936   | 2.4945111   |
| "Tnk2"      | 5.01872885  | 5.63993785  | 4.85277985  | 4.8296865   | 5.3024055   | 6.20477785  | 5.1270992   | 5.15677025  |
| "Tnks1bp1"  | 2.7400484   | 2.8217926   | 2.855424    | 2.9365711   | 3.092659    | 2.8925738   | 2.9001598   | 2.9958565   |
| "Tnks2"     | 5.924311    | 5.90400105  | 5.95450645  | 6.02991225  | 5.8032005   | 5.92045305  | 5.85898585  | 5.92606475  |
| "Tnnc1"     | 2.8304405   | 2.7132888   | 2.663029    | 2.7048805   | 3.2274969   | 2.8127394   | 2.7649271   | 2.8112104   |
| "Tnni2"     | 2.673146    | 2.64072525  | 2.56969125  | 2.69530465  | 2.69266975  | 2.6626708   | 2.6535205   | 2.66583775  |
| "Tnnt1"     | 3.1198378   | 3.0112047   | 3.2105236   | 3.394054    | 3.1416266   | 3.4652672   | 3.294853    | 3.1388264   |
| "Tnnt2"     | 2.778295    | 2.87788225  | 2.6382463   | 2.69393365  | 3.2833028   | 2.81741165  | 2.7628289   | 2.8267609   |
| "Tnnt3"     | 2.508026    | 2.4788797   | 2.439961    | 2.4600441   | 2.5042164   | 2.503355    | 2.50099     | 2.507729    |
| "Tnp1"      | 3.6496308   | 3.6902778   | 3.47214015  | 3.54785065  | 3.74204975  | 3.8712093   | 3.5724443   | 3.7550236   |
| "Tnp2"      | 2.6712265   | 2.6445591   | 2.5708308   | 2.6045659   | 2.667363    | 2.6744435   | 2.6468918   | 2.66988     |
| "Tnp01"     | 7.4959185   | 7.3013608   | 7.62192     | 7.643784    | 7.6002213   | 7.6014315   | 7.73403715  | 7.96230065  |
| "Tnp03"     | 7.2889755   | 7.3648929   | 7.112886333 | 7.185953333 | 7.463764333 | 7.544793333 | 7.178747867 | 7.2815985   |
| "Tnrc18"    | 2.73231     | 2.8430798   | 2.7412763   | 2.7966738   | 2.819374    | 2.8684525   | 2.808095    | 2.917857    |
| "Tnrc6a"    | 8.015212071 | 7.755290529 | 7.840239014 | 8.215098271 | 7.562428329 | 7.775164443 | 7.834075714 | 7.836680557 |
| "Tnrc6b"    | 6.846818    | 7.3610406   | 7.2931046   | 7.5392838   | 7.753112    | 7.4428635   | 7.574249    | 7.7589293   |
| "Tnrc6c"    | 6.216074    | 6.55461955  | 6.1116645   | 6.60003115  | 6.4335388   | 6.805332    | 6.1824067   | 6.250778    |
| "Tns1"      | 7.390799    | 8.13620475  | 6.0952485   | 6.07076085  | 6.46572565  | 7.541324    | 7.09920175  | 5.8029294   |
| "Tnxb"      | 2.461545    | 2.3931322   | 2.8061059   | 2.5140488   | 2.4570384   | 2.4051497   | 2.6867595   | 2.4418595   |
| "Tob1"      | 12.056124   | 10.915761   | 10.883838   | 11.110881   | 10.8961115  | 11.428046   | 11.943115   | 11.436715   |
| "Tob2"      | 8.12135125  | 7.6836259   | 7.260544325 | 7.29594765  | 8.126409    | 7.84956185  | 7.6619278   | 7.6695485   |
| "Toe1"      | 4.11073945  | 4.345884    | 3.9635979   | 3.99399475  | 4.0408525   | 4.03641915  | 3.8810856   | 4.1489611   |
| "Tollip"    | 8.86316     | 8.982111    | 8.978244    | 8.984945    | 8.882935    | 8.846405    | 8.528299    | 8.880543    |
| "Tom1"      | 7.0972335   | 6.9730246   | 6.72386235  | 6.48570285  | 6.7606905   | 7.0581755   | 6.26629775  | 6.83742015  |
| "Tom1l1"    | 5.683534    | 5.985231    | 5.289909    | 5.5041595   | 5.620443    | 5.8573904   | 5.505709    | 5.77832     |
| "Tom1l2"    | 3.31221805  | 3.5353143   | 3.0906311   | 3.27613075  | 3.32456275  | 3.51984445  | 3.31047525  | 3.3674833   |
| "Tomm20"    | 10.863529   | 10.9554066  | 10.11727368 | 10.05267296 | 10.5846786  | 10.85045614 | 10.1573552  | 10.17880466 |
| "Tomm22"    | 8.4568385   | 8.9251575   | 8.3712085   | 8.4012368   | 8.5624865   | 8.7668495   | 8.35414165  | 8.662796    |
| "Tomm34"    | 7.434646    | 6.7026124   | 7.060761    | 7.112814    | 6.5331936   | 6.562977    | 6.9702787   | 6.9488916   |
| "Tomm40"    | 5.935336    | 6.3766613   | 5.880228    | 5.74657     | 6.1827335   | 6.1516623   | 5.596907    | 5.911501    |
| "Tomm40l"   | 5.342343    | 5.6344724   | 6.0438123   | 5.722904    | 6.306798    | 6.2483153   | 6.2116103   | 6.3770576   |

|            |             |             |             |             |             |             |             |             |
|------------|-------------|-------------|-------------|-------------|-------------|-------------|-------------|-------------|
| "Tomm70a"  | 8.591380825 | 9.23808225  | 9.070196625 | 9.084026625 | 9.210410375 | 9.2141859   | 9.29186875  | 9.359102    |
| "Top1"     | 10.103954   | 10.241136   | 10.251678   | 10.2254305  | 10.475149   | 10.493114   | 10.101587   | 10.008209   |
| "Top1mt"   | 6.904338    | 7.3313065   | 7.438717    | 7.3432274   | 7.341961    | 7.4388638   | 7.851532    | 7.090431    |
| "Top2a"    | 2.8364139   | 2.4398673   | 4.02784     | 2.611266    | 2.6008298   | 2.5372963   | 3.3012767   | 2.3036385   |
| "Top2b"    | 5.561714    | 5.4534525   | 5.343990367 | 5.46943     | 5.325781233 | 5.5632846   | 5.5771391   | 5.636032433 |
| "Top3a"    | 3.4243312   | 2.8586805   | 2.7586439   | 2.7793076   | 2.8284156   | 2.7003994   | 2.6122694   | 2.8209913   |
| "Top3b"    | 4.452705933 | 4.399805867 | 4.468855933 | 4.226070967 | 4.359181767 | 4.481850933 | 4.587632667 | 4.384752633 |
| "Topbp1"   | 7.2912993   | 6.8866296   | 7.226596    | 7.279776    | 7.0722804   | 7.0784287   | 7.615939    | 7.4412436   |
| "Topors"   | 9.090075667 | 7.609020033 | 7.249210767 | 7.535349333 | 7.4191543   | 7.794962333 | 7.418229667 | 7.888392    |
| "Tor1a"    | 8.889626    | 9.962578    | 9.021275    | 8.878061    | 9.321879    | 9.586867    | 8.539228    | 8.868183    |
| "Tor1aip1" | 7.9812613   | 8.349068    | 8.249599    | 8.19826     | 7.5490637   | 7.954519    | 8.319209    | 8.165746    |
| "Tor1aip2" | 8.4830881   | 9.2053499   | 9.6373041   | 9.5481479   | 8.9262242   | 8.871342175 | 9.934217925 | 9.450874625 |
| "Tor1b"    | 7.008768667 | 7.8497831   | 6.790137233 | 6.820090833 | 7.315673867 | 7.687971667 | 6.392524    | 6.7702632   |
| "Tor2a"    | 7.8048611   | 7.8920515   | 7.85641025  | 7.84440725  | 7.7615615   | 7.877637    | 7.902989    | 7.8525725   |
| "Tor3a"    | 4.006514    | 3.2147434   | 4.502827    | 4.155571    | 3.5271673   | 3.307721    | 3.8522038   | 3.3836668   |
| "Tox"      | 4.47261835  | 4.54327655  | 3.88774925  | 3.6730323   | 4.55401695  | 4.4518163   | 4.0851358   | 3.54041365  |
| "Tox4"     | 7.37538385  | 6.9107575   | 6.82090445  | 7.0627649   | 6.91402365  | 7.10340015  | 7.041661    | 7.09581415  |
| "Tpbg"     | 2.612963267 | 2.606090633 | 2.468299    | 2.5315957   | 2.659000667 | 2.6203761   | 2.580616833 | 2.641333533 |
| "Tpbpa"    | 2.8378636   | 2.850346533 | 2.705636633 | 2.7620381   | 2.9312518   | 2.960999067 | 2.798837267 | 2.949032633 |
| "Tpbpb"    | 3.32300555  | 3.31193185  | 3.22004325  | 3.26484     | 3.3762928   | 3.41962675  | 3.2025186   | 3.3486989   |
| "Tpcn1"    | 6.5232058   | 8.094776    | 6.9419203   | 7.4749722   | 7.8983603   | 7.6707907   | 7.522083    | 7.467618    |
| "Tpcn2"    | 4.441175    | 3.1579106   | 3.7740316   | 3.272723    | 3.179906    | 3.1731157   | 2.9663928   | 2.9163208   |
| "Tpd52"    | 8.2816437   | 7.30063265  | 8.2341875   | 7.5568995   | 7.2512325   | 7.25313315  | 7.3116355   | 7.38761445  |
| "Tpd52l1"  | 6.22375     | 7.657679    | 6.523646    | 6.6717424   | 7.4077635   | 7.0255575   | 7.1097236   | 6.837672    |
| "Tpd52l2"  | 6.432180267 | 6.370688667 | 6.4702871   | 6.475417667 | 6.1411378   | 6.460794467 | 6.2567806   | 6.3871268   |
| "Tpi1"     | 11.135848   | 11.306851   | 11.679238   | 11.397421   | 11.42497667 | 11.557713   | 11.542238   | 11.353817   |
| "Tpk1"     | 5.119273    | 5.6460567   | 5.9763336   | 6.3738503   | 5.3415914   | 5.017014    | 5.9886246   | 6.1239185   |
| "Tpm1"     | 5.072655    | 5.110828667 | 5.809668733 | 5.2009527   | 5.1613776   | 5.152830533 | 5.037102733 | 5.421314333 |
| "Tpm2"     | 3.666037367 | 3.8086203   | 3.824368367 | 4.080827767 | 4.4725376   | 3.9427331   | 5.261584733 | 4.05864833  |
| "Tpm3"     | 6.59755235  | 6.27455685  | 7.0360206   | 6.509064625 | 6.3898393   | 6.301426975 | 6.5754139   | 6.3910755   |
| "Tpm4"     | 10.304888   | 8.359706    | 9.772294    | 9.316035    | 8.597399    | 8.619302    | 9.764349    | 9.048982    |
| "Tpmnt"    | 5.3405678   | 6.2858392   | 5.9587448   | 6.36186515  | 6.0013738   | 5.48701215  | 6.04381105  | 6.51008675  |
| "Tpo"      | 2.5147648   | 2.4798086   | 2.3897743   | 2.427968    | 2.4948533   | 2.655337    | 2.485959    | 2.4836416   |
| "Tpp1"     | 9.54687     | 9.14844     | 9.3280365   | 9.48858075  | 9.5525065   | 9.782478    | 9.4726745   | 9.336725    |
| "Tpp2"     | 7.76616292  | 6.62108952  | 6.4017299   | 6.46171494  | 6.53910656  | 6.59791634  | 6.57255068  | 6.98232028  |
| "Tppp3"    | 5.2069874   | 3.9497335   | 3.6335762   | 3.3148012   | 3.535529    | 3.4280562   | 3.5376742   | 3.3407207   |
| "Tpr"      | 7.842007275 | 7.568352725 | 7.65173485  | 7.596442925 | 7.3145027   | 7.75787875  | 7.4567928   | 7.326690675 |
| "Tpra1"    | 4.935732    | 4.905766    | 5.3012238   | 5.4190383   | 5.0966125   | 5.4843783   | 4.581444    | 4.9946036   |
| "Tprgl"    | 9.411735    | 9.551298    | 9.505299    | 9.804639    | 9.810393    | 9.434186    | 9.752109    | 9.595812    |
| "Tprkb"    | 7.657043333 | 7.292021467 | 6.9142589   | 7.335281767 | 7.066892667 | 7.251470933 | 7.309390833 | 8.3292079   |
| "Tprn"     | 2.7431092   | 2.675569    | 2.58174     | 2.5968008   | 2.6150193   | 2.6305587   | 2.6274414   | 2.5994308   |
| "Tpsab1"   | 2.783003    | 2.7533462   | 2.6866784   | 2.718662    | 2.7805889   | 2.7780068   | 2.7725093   | 2.7628443   |
| "Tpst1"    | 6.913227    | 5.879001    | 7.058367    | 6.7281146   | 6.3461447   | 6.465855    | 6.3759766   | 7.0805883   |
| "Tpt1"     | 8.61223     | 7.657964    | 8.025143    | 7.4966354   | 7.3128233   | 7.9078984   | 7.904556    | 7.249541    |
| "Tpte"     | 14.962081   | 15.01236    | 15.00512    | 14.951539   | 14.999937   | 14.988736   | 14.916707   | 14.959084   |
| "Tpte"     | 2.5308428   | 2.4961004   | 2.4608352   | 2.4806788   | 2.5165145   | 2.5138633   | 2.5205622   | 2.5082238   |
| "Tpx2"     | 2.7595625   | 2.7258227   | 2.6169257   | 2.6971567   | 2.7505825   | 2.7552967   | 2.7490916   | 2.7357635   |
| "Tra2a"    | 9.046735    | 7.605014    | 8.485246    | 8.033622    | 7.6915517   | 8.762613    | 8.616499    | 7.718011    |
| "Tra2b"    | 10.364237   | 9.7179835   | 9.994254    | 9.2776365   | 9.529712    | 9.7483665   | 9.6718585   | 9.04611     |
| "Trabd"    | 5.59485115  | 6.31974415  | 5.5917525   | 5.1882835   | 6.7345095   | 6.4916545   | 5.558923    | 6.08896     |
| "Trad"     | 5.3687146   | 5.3975682   | 5.667772    | 5.35456555  | 5.40946935  | 5.23058935  | 5.30835525  | 5.6274655   |
| "Traf2"    | 5.760781    | 4.9361095   | 5.1642714   | 5.064528    | 5.088521    | 4.9988227   | 5.100687    | 5.108536    |
| "Traf3"    | 3.9328561   | 3.7690979   | 4.0989628   | 4.454914    | 3.498922    | 3.60640135  | 4.1001037   | 3.98211     |
| "Traf3ip2" | 3.6790977   | 3.4582596   | 4.7783847   | 3.4419186   | 3.4814448   | 3.4734166   | 3.4882884   | 4.028552    |
| "Traf4"    | 4.3827333   | 4.37304     | 3.975178    | 4.4862785   | 3.7578135   | 4.688492    | 4.3500295   | 4.6593814   |
| "Traf5"    | 2.9817379   | 3.9080403   | 4.46432     | 4.9281483   | 4.154983    | 4.247522    | 4.3471317   | 4.1533394   |
| "Traf6"    | 3.7040212   | 3.485661333 | 3.053386867 | 3.3300406   | 3.460292067 | 3.284467867 | 3.030033967 | 3.294788    |
| "Traf7"    | 4.3232265   | 4.293894    | 4.7696433   | 4.4870405   | 3.9376535   | 4.2988214   | 4.2336116   | 4.286202    |
| "Trafd1"   | 8.535575    | 7.7885375   | 8.681276    | 8.539377    | 7.576781    | 7.965333    | 7.9877295   | 7.9220347   |
| "Traip"    | 2.4717546   | 2.3323255   | 2.2608469   | 2.3046124   | 2.3957424   | 2.3552861   | 2.3483331   | 2.3495252   |
| "Trak1"    | 4.6590227   | 5.2159895   | 5.0482216   | 4.97126065  | 5.30842965  | 5.221717    | 5.0280077   | 5.23523075  |
| "Tram1"    | 6.45051265  | 6.96281005  | 6.79520405  | 6.79064725  | 6.9101235   | 6.67050925  | 6.8413923   | 7.0337152   |
| "Tram1l1"  | 2.450585    | 2.4267273   | 2.3636076   | 2.3841708   | 2.4674187   | 2.4498017   | 2.4397368   | 2.448063    |
| "Tram2"    | 2.650033    | 2.6243014   | 2.552442    | 2.5833225   | 2.6554632   | 2.6529613   | 2.6283803   | 2.649633    |
| "Trap1"    | 8.3518235   | 8.64536715  | 8.7451975   | 8.8283395   | 8.806545    | 8.51988215  | 8.821387    | 8.9509195   |
| "Trap1a"   | 2.4408789   | 2.4058883   | 2.31856     | 2.3775861   | 2.4352024   | 2.4264853   | 2.4310036   | 2.4282558   |
| "Trappc1"  | 8.185589    | 8.3454275   | 8.462884    | 8.462726    | 8.30968     | 8.002991    | 8.546879    | 8.473777    |
| "Trappc10" | 8.197941    | 8.126767    | 7.9130826   | 7.933035    | 7.9336863   | 8.117249    | 7.727651    | 7.89232     |
| "Trappc2"  | 6.9614882   | 7.4323177   | 7.6278486   | 7.7423205   | 7.3846226   | 7.3783765   | 8.043662    | 7.5920305   |
| "Trappc2l" | 8.51232     | 9.228105    | 8.907826    | 8.98717     | 8.769154    | 8.873704    | 8.79599     | 8.980157    |
| "Trappc3"  | 7.5819035   | 7.7118225   | 7.7139206   | 7.6563716   | 7.7038927   | 7.5789223   | 7.3834114   | 7.494104    |
| "Trappc4"  | 7.7221785   | 7.878668    | 8.105562    | 8.11349     | 7.765767    | 8.200175    | 8.433159    | 8.039503    |
| "Trappc5"  | 5.8106332   | 5.894567    | 5.76343965  | 5.5633165   | 5.9428063   | 5.82942475  | 5.73496655  | 5.846559    |
| "Trappc6a" | 6.6152096   | 7.502716    | 7.1094966   | 7.4781213   | 7.2617164   | 7.1951137   | 7.056981    | 7.154495    |
| "Trat1"    | 2.4657445   | 2.4558592   | 2.3649564   | 2.387136    | 2.5246592   | 2.457436    | 2.4479122   | 2.523614    |
| "Trav9d-3" | 3.232241325 | 3.068102    | 3.73431035  | 3.524889475 | 3.5988482   | 3.240318    | 3.5840658   | 3.45995235  |
| "Trdmt1"   | 4.1451059   | 4.58221245  | 5.19597285  | 5.32865135  | 4.76896725  | 4.30591225  | 5.0234138   | 4.6967387   |
| "Trdn"     | 3.00835122  | 3.00840982  | 2.845246    | 2.93231718  | 3.09494794  | 3.0857139   | 2.93747286  | 3.09761252  |
| "Treh"     | 2.9651368   | 3.3221781   | 2.6333895   | 2.63436     | 2.7584343   | 2.8517525   | 2.714836    | 2.769518    |
| "Trem2"    | 2.69699335  | 2.6759249   | 2.7145649   | 2.6236344   | 2.7135817   | 2.73562645  | 2.64875795  | 2.7088019   |
| "Trem3"    | 2.9346955   | 2.250594    | 3.7855465   | 2.2922702   | 2.2709188   | 2.2583897   | 2.2753792   | 2.2553763   |

|             |             |             |             |             |             |             |             |             |
|-------------|-------------|-------------|-------------|-------------|-------------|-------------|-------------|-------------|
| "Trh"       | 2.3424532   | 2.3069596   | 2.2575002   | 2.303143    | 2.3282256   | 2.3728428   | 2.3244548   | 2.3159711   |
| "Trhr"      | 2.563484    | 2.5333803   | 2.452175    | 2.4902961   | 2.5661583   | 2.5613995   | 2.5534246   | 2.557484    |
| "Trhr2"     | 2.070834    | 2.3787305   | 2.3463757   | 2.3391078   | 2.377395    | 2.3667796   | 2.3794975   | 2.360194    |
| "Triap1"    | 7.603106    | 7.061398    | 6.9999056   | 7.335127    | 7.0458946   | 7.143483    | 6.892841    | 7.1719027   |
| "Trib1"     | 4.5999871   | 4.2447681   | 4.206993    | 4.25471815  | 4.45847565  | 4.37220415  | 4.42089775  | 4.23510625  |
| "Trib2"     | 4.27767625  | 3.9883058   | 3.8175609   | 3.87899585  | 3.713528    | 3.7190115   | 4.08261535  | 3.79511335  |
| "Trib3"     | 6.19997645  | 6.72466615  | 6.517951    | 7.8140035   | 5.1457805   | 7.5250043   | 6.692533    | 6.36826965  |
| "Trim10"    | 2.3384147   | 2.3053627   | 2.2557015   | 2.2730818   | 2.3314      | 2.812819    | 2.535476    | 2.3117352   |
| "Trim11"    | 7.3167334   | 7.0831604   | 7.1278663   | 7.368758    | 7.1083727   | 6.8994412   | 7.1096168   | 7.3664722   |
| "Trim12a"   | 4.2310034   | 4.17190965  | 4.9807008   | 4.85400805  | 4.15243585  | 3.93833665  | 4.7849149   | 4.34989165  |
| "Trim13"    | 3.5590584   | 3.3142333   | 2.751832    | 2.4615111   | 2.676446    | 2.6105196   | 3.194335    | 2.5314863   |
| "Trim15"    | 2.4381008   | 2.405046    | 3.4316485   | 2.5996056   | 2.4054358   | 2.4188554   | 2.3828833   | 2.4035919   |
| "Trim2"     | 4.76440745  | 5.75521535  | 6.25345655  | 5.420523975 | 5.61594255  | 5.351180475 | 6.235735075 | 5.32781905  |
| "Trim21"    | 5.5226374   | 5.7659893   | 8.022055    | 7.5848413   | 6.340046    | 6.433577    | 7.2143      | 7.1203423   |
| "Trim23"    | 7.6569195   | 7.3325806   | 7.0355783   | 7.2076445   | 7.3605022   | 7.5807524   | 7.555885    | 7.211404    |
| "Trim24"    | 5.7976974   | 6.01699635  | 5.8373923   | 6.02638925  | 5.92761985  | 5.99386845  | 5.98446285  | 5.3807522   |
| "Trim25"    | 9.232322    | 8.320397233 | 8.818880467 | 8.682892733 | 8.305224833 | 8.848672333 | 8.1933682   | 8.232471167 |
| "Trim26"    | 4.7537645   | 4.74369985  | 5.33617735  | 5.24388085  | 4.56272685  | 4.7931128   | 4.9541351   | 5.08452435  |
| "Trim27"    | 6.5604918   | 6.63455195  | 6.2095448   | 6.214539825 | 6.44923975  | 6.74995275  | 6.17390115  | 6.34720635  |
| "Trim28"    | 7.0295076   | 7.137584    | 6.7778788   | 7.107884    | 7.0713096   | 7.5472245   | 6.7667875   | 7.1427736   |
| "Trim3"     | 3.366821    | 3.2503867   | 3.3229394   | 3.324097    | 3.3401349   | 3.3484743   | 3.3569262   | 3.3401928   |
| "Trim30a"   | 6.658150233 | 4.916036133 | 7.726782167 | 7.090985433 | 5.669070433 | 5.344255467 | 6.834136667 | 5.858648567 |
| "Trim30d"   | 2.530909    | 2.506825    | 3.773838    | 3.024119    | 2.5396376   | 2.5324016   | 2.5457416   | 2.5357652   |
| "Trim32"    | 6.61059     | 5.5554805   | 5.7227497   | 5.792779    | 5.581501    | 5.85507     | 6.028577    | 5.649693    |
| "Trim33"    | 8.235033    | 8.233859    | 7.9829597   | 8.203656    | 8.245345    | 8.616885    | 8.067054    | 8.16142     |
| "Trim34a"   | 3.52080235  | 3.649230175 | 4.64673335  | 4.4824989   | 3.685075875 | 3.7500335   | 4.17897285  | 3.986793975 |
| "Trim37"    | 4.723303475 | 4.699421675 | 4.68906215  | 4.7238145   | 4.298468775 | 4.8427657   | 4.933690825 | 4.551279175 |
| "Trim39"    | 5.541203    | 5.600197    | 4.6792035   | 4.905695    | 5.6448383   | 5.787928    | 5.083167    | 5.1471505   |
| "Trim41"    | 7.3861403   | 7.2241793   | 7.00796     | 7.4094224   | 7.208853    | 7.2392      | 7.140015    | 6.976423    |
| "Trim44"    | 5.7617595   | 5.9741021   | 5.7689794   | 5.8530766   | 5.9326935   | 5.850093    | 5.86206235  | 5.82532335  |
| "Trim47"    | 2.5491772   | 2.5103598   | 2.4997246   | 2.505074    | 2.536465    | 2.5269513   | 2.5426586   | 2.521196    |
| "Trim59"    | 3.142603    | 2.8870804   | 2.803896    | 3.6068254   | 3.0994341   | 3.0939252   | 3.8109934   | 3.0006108   |
| "Trim60"    | 2.8634899   | 2.883917    | 2.7403154   | 2.77838     | 2.8692188   | 2.9100597   | 2.840075    | 2.8655746   |
| "Trim62"    | 2.8147611   | 2.799006567 | 2.719980367 | 2.751854733 | 2.849806367 | 2.88322     | 2.798744833 | 2.8482481   |
| "Trim69"    | 2.4753697   | 2.453652    | 2.4654531   | 2.4180052   | 2.4762728   | 2.4724953   | 2.4658735   | 2.4701712   |
| "Trim7"     | 2.94054245  | 3.06698085  | 2.8070933   | 2.85570165  | 3.0392107   | 2.9490688   | 2.95116495  | 2.94900665  |
| "Trim8"     | 5.10857665  | 4.4717164   | 4.5533662   | 4.5628934   | 4.5971169   | 4.59479645  | 4.6008439   | 4.6158115   |
| "Trio"      | 6.8588524   | 6.3640723   | 6.7005463   | 6.6494953   | 6.34939935  | 6.5881385   | 6.70773465  | 7.0762065   |
| "Triobp"    | 4.811787    | 6.301769    | 5.381041    | 6.5925303   | 5.6972446   | 6.48896     | 6.1760793   | 6.4930716   |
| "Trip10"    | 2.9678915   | 2.6738248   | 2.8928788   | 2.218731    | 2.9096005   | 2.5084193   | 2.5883815   | 3.0312092   |
| "Trip11"    | 8.6850865   | 8.5701565   | 8.2976135   | 8.17116175  | 8.3726778   | 8.470634    | 8.063681    | 8.42202725  |
| "Trip12"    | 6.51104322  | 6.7502803   | 6.6315663   | 6.6091541   | 6.53020458  | 6.62658134  | 6.5026525   | 6.47199436  |
| "Trip13"    | 2.9310702   | 2.90691305  | 3.29584815  | 2.89721895  | 2.9621673   | 2.91590835  | 3.47238935  | 2.9852067   |
| "Trip4"     | 5.641666833 | 6.2070684   | 5.7635828   | 6.010153733 | 5.975700967 | 6.422156633 | 5.9778189   | 6.5313211   |
| "Trip6"     | 7.1685677   | 7.868998    | 7.542794    | 7.4237833   | 7.573533    | 7.7220993   | 7.582802    | 7.5666003   |
| "Trit1"     | 7.7743073   | 8.51722     | 8.116582    | 8.209756    | 8.254874    | 8.345384    | 8.362312    | 8.675769    |
| "Trmt1"     | 6.579721333 | 6.251830667 | 5.643873767 | 5.632379933 | 6.115848833 | 6.593289467 | 5.572377033 | 5.8845952   |
| "Trmt112"   | 9.741634    | 10.1418495  | 10.2258005  | 10.12698    | 9.983034    | 10.290978   | 10.024623   | 10.23089    |
| "Trmt2a"    | 5.9786648   | 5.9830256   | 5.669891333 | 5.688187267 | 5.988143767 | 5.976927467 | 5.765539467 | 5.743083967 |
| "Trmt5"     | 4.870362    | 5.094048    | 5.6711254   | 4.9427547   | 4.9110556   | 4.904996    | 4.9162416   | 4.4202141   |
| "Trnt1"     | 6.1590533   | 5.99151285  | 5.4933145   | 5.6996878   | 5.8827742   | 5.92459925  | 5.70801035  | 5.82721615  |
| "Tro"       | 2.4904089   | 2.47066495  | 2.40632975  | 2.40764415  | 2.4876001   | 2.48055195  | 2.47650095  | 2.478615    |
| "Trove2"    | 3.1441097   | 3.1695614   | 3.0552342   | 3.1314023   | 3.7024384   | 3.4099991   | 3.4089751   | 3.254781    |
| "Trp53"     | 2.832424167 | 2.8091693   | 2.759304833 | 2.789974    | 2.848687833 | 2.827392233 | 2.870939867 | 2.876636367 |
| "Trp53bp1"  | 5.90002425  | 5.469873    | 6.2453343   | 6.17992035  | 5.36446265  | 5.73759975  | 6.0941123   | 5.21295815  |
| "Trp53i13"  | 2.9606256   | 2.8688624   | 2.9087808   | 2.9251      | 2.9405997   | 2.9299247   | 2.9452043   | 2.978238    |
| "Trp53inp1" | 9.97383825  | 8.12259015  | 7.3512692   | 7.26157515  | 6.9092175   | 8.4475455   | 6.8482096   | 6.5061687   |
| "Trp53inp2" | 9.005734    | 10.564208   | 9.342089    | 9.321185    | 9.78065     | 9.842715    | 9.29735     | 9.32399     |
| "Trp53rk"   | 2.626213    | 2.6065538   | 2.5318265   | 2.53682     | 2.6170576   | 2.60685     | 2.6182342   | 2.6000738   |
| "Trp63"     | 2.672407667 | 2.668738933 | 2.587840767 | 2.5821166   | 2.679811267 | 2.6740749   | 2.6443573   | 2.669672067 |
| "Trpc1"     | 2.861569    | 2.8065104   | 2.679299    | 2.6952877   | 2.7614553   | 2.8300626   | 2.7592402   | 2.7672927   |
| "Trpc2"     | 2.7491914   | 2.7326699   | 2.68979355  | 2.70124675  | 3.11883605  | 2.823714    | 2.75021255  | 2.73250005  |
| "Trpc3"     | 2.5947905   | 2.4641972   | 2.5266297   | 2.5505555   | 2.6575203   | 3.1288118   | 2.6501517   | 2.5730925   |
| "Trpc4"     | 2.6049788   | 2.7194347   | 2.4741535   | 2.5434449   | 2.5912278   | 2.5807674   | 2.5702615   | 2.5810835   |
| "Trpc4ap"   | 7.013218    | 7.0427465   | 6.8793826   | 7.0502577   | 7.4991474   | 7.0593696   | 7.0629754   | 7.1789365   |
| "Trpc6"     | 2.9964514   | 3.0732915   | 2.8038337   | 2.8592384   | 2.9870071   | 2.9919722   | 2.9099636   | 3.031275    |
| "Trpc7"     | 2.9445782   | 2.9991734   | 2.8901305   | 2.9123154   | 2.9518538   | 2.9816036   | 2.8856547   | 2.960279    |
| "Trpm1"     | 3.0076134   | 2.9930484   | 2.8440738   | 2.9747293   | 3.0223396   | 3.0188956   | 2.9618745   | 3.0561767   |
| "Trpm5"     | 2.985713    | 2.9806433   | 2.797726    | 2.9305544   | 3.056561    | 3.0150437   | 2.9175956   | 3.0041528   |
| "Trpm7"     | 7.856736467 | 7.935743067 | 7.275692067 | 8.065303333 | 7.726878367 | 7.868669467 | 7.867068    | 8.120703667 |
| "Trpm8"     | 2.934239    | 2.9102225   | 2.7925985   | 2.8415496   | 2.9509456   | 2.9477248   | 2.9040155   | 2.967705    |
| "Trps1"     | 2.9217296   | 2.868346    | 2.9710855   | 2.809657    | 2.9142601   | 2.901843    | 2.8685906   | 2.9960895   |
| "Trpt1"     | 3.6208694   | 4.9013653   | 3.0294187   | 3.6916564   | 3.5219872   | 4.5741334   | 3.4676132   | 3.6693923   |
| "Trpv2"     | 3.9441462   | 3.9719262   | 3.950929    | 3.8846684   | 3.9202385   | 4.0115438   | 3.893877    | 3.8769085   |
| "Trpv6"     | 2.5139227   | 2.8148642   | 2.4047875   | 2.4381297   | 2.5129006   | 2.5066402   | 2.5147083   | 2.5046773   |
| "Trrap"     | 7.4329104   | 6.6108856   | 7.8593445   | 7.2482233   | 7.4175215   | 7.1863804   | 7.510451    | 7.408412    |
| "Trub2"     | 6.1165395   | 6.6186175   | 6.070027367 | 5.767630667 | 6.609891067 | 5.941951233 | 6.160294133 | 5.6564534   |
| "Try4"      | 2.4839878   | 2.4545982   | 2.3861098   | 2.3869567   | 2.4724956   | 2.4640417   | 2.4649324   | 2.457057    |
| "Tsc1"      | 4.80736825  | 4.641124    | 4.92414355  | 4.77332685  | 4.6732254   | 5.02884175  | 4.9473296   | 4.92560185  |
| "Tsc2"      | 3.6873496   | 4.1886783   | 3.9272795   | 4.3008604   | 4.233519    | 3.9469013   | 4.3064184   | 4.4817147   |
| "Tsc22d1"   | 7.40824936  | 7.06622178  | 6.92084704  | 7.32340022  | 7.73433744  | 7.45453918  | 7.64501154  | 7.21674794  |

|            |             |             |             |             |             |             |             |             |
|------------|-------------|-------------|-------------|-------------|-------------|-------------|-------------|-------------|
| "Tsc22d3"  | 8.5406658   | 7.762451    | 7.2346208   | 7.000508333 | 7.7571275   | 7.5711025   | 6.8969573   | 6.7215579   |
| "Tsc22d4"  | 5.8611836   | 5.2030478   | 5.722065    | 5.702581    | 5.291906    | 5.3998804   | 5.488534    | 5.6923475   |
| "Tsen15"   | 6.5872474   | 6.0113187   | 5.839983    | 6.128024    | 5.5861974   | 6.048002    | 6.036589    | 5.5799413   |
| "Tsen34"   | 7.526034    | 7.6107388   | 7.7708      | 7.5209394   | 7.491682    | 7.551213    | 7.766604    | 7.6017227   |
| "Tsg101"   | 8.746875    | 8.86483     | 8.352132    | 8.595948    | 8.669311    | 8.771713    | 8.7303705   | 8.584067    |
| "Tsga13"   | 2.522035    | 2.51625     | 2.4272888   | 2.465733    | 2.5466204   | 2.561874    | 2.5063567   | 2.5395393   |
| "Tshb"     | 2.455192    | 2.4205904   | 2.3750522   | 2.3794413   | 2.4407597   | 2.4539359   | 2.4371815   | 2.4259129   |
| "Tshr"     | 2.69583     | 2.6714182   | 2.59498645  | 2.619174    | 2.6990852   | 2.70325595  | 2.6747505   | 2.770931    |
| "Tshz1"    | 7.331424    | 7.95181065  | 6.98835165  | 7.50013565  | 7.6297725   | 7.5228005   | 7.39424665  | 7.954475    |
| "Tshz2"    | 2.334459    | 2.3012915   | 2.34033     | 2.2803028   | 2.321343    | 2.3104906   | 2.320429    | 2.3119886   |
| "Tsk"      | 6.416012    | 6.6670966   | 5.918973    | 6.0284934   | 7.192533    | 6.96955     | 5.9162107   | 6.5082636   |
| "Tsku"     | 5.9206038   | 8.62438     | 7.585699    | 7.28731     | 8.412838    | 7.896683    | 6.7959886   | 6.609265    |
| "Tslp"     | 2.6441052   | 2.6110194   | 2.6300023   | 2.5726743   | 2.6453974   | 2.962102    | 2.6085944   | 2.7420468   |
| "Tsn"      | 7.76630765  | 7.841263625 | 7.958723275 | 8.0463094   | 7.854421825 | 7.52938645  | 8.10335125  | 7.72289575  |
| "Tsnax"    | 5.1162316   | 5.93755685  | 5.7698436   | 5.7945459   | 6.0091515   | 5.97815335  | 5.79664035  | 5.63265605  |
| "Tsnaxip1" | 2.5901172   | 2.5619898   | 2.510133    | 2.5402918   | 2.5875628   | 2.58047     | 2.5656285   | 2.5770946   |
| "Tspan1"   | 2.4911013   | 2.46071255  | 2.39257505  | 2.4236872   | 2.48493505  | 2.48029225  | 2.47589425  | 2.4755472   |
| "Tspan12"  | 9.86376     | 9.53812     | 9.359773    | 9.8702545   | 9.776384    | 10.12382    | 10.24506    | 10.176267   |
| "Tspan13"  | 4.53591065  | 3.1555941   | 4.57380965  | 3.56570025  | 3.57001995  | 3.6383288   | 3.7679125   | 3.4373227   |
| "Tspan14"  | 7.0164995   | 6.394088    | 7.362666    | 7.2033696   | 6.722668    | 6.4931436   | 7.4046545   | 6.730561    |
| "Tspan15"  | 2.5069497   | 2.0768511   | 3.3674233   | 2.9874854   | 2.0945377   | 2.0839658   | 2.2178056   | 2.1971986   |
| "Tspan17"  | 2.7563695   | 2.38756585  | 2.6517891   | 2.65068245  | 2.346195    | 2.54774495  | 2.4419898   | 2.40370425  |
| "Tspan2"   | 2.587193333 | 2.4999433   | 2.478878433 | 2.6941062   | 2.545657767 | 2.8136963   | 2.847953167 | 2.7484405   |
| "Tspan3"   | 5.8919272   | 5.8689804   | 5.8419595   | 5.852824    | 5.7668214   | 5.3068075   | 5.7505827   | 5.725376    |
| "Tspan31"  | 8.7508102   | 9.4205194   | 9.177417167 | 9.515904333 | 9.129067167 | 9.5830231   | 9.18549133  | 9.202894767 |
| "Tspan32"  | 2.8706572   | 2.8449986   | 3.1423707   | 2.7937205   | 2.9085026   | 2.9077685   | 2.8544676   | 2.8704293   |
| "Tspan33"  | 5.2910827   | 5.07060875  | 4.671402875 | 4.520813525 | 4.9624624   | 5.387497775 | 5.240949875 | 5.4325005   |
| "Tspan4"   | 10.2022705  | 10.015423   | 9.417363    | 9.939183    | 10.36063    | 9.548316    | 8.555423    | 9.93481     |
| "Tspan5"   | 2.675396    | 2.6241512   | 2.520916    | 2.5680456   | 2.6582642   | 2.6906266   | 2.6256068   | 2.6508257   |
| "Tspan6"   | 2.520278    | 2.4876846   | 2.46950565  | 2.465994    | 2.57631975  | 2.50312475  | 2.49666875  | 2.50812045  |
| "Tspan7"   | 5.67766615  | 5.02682485  | 5.6784348   | 5.7838799   | 5.63656095  | 5.2894252   | 5.69574375  | 5.5543385   |
| "Tspan8"   | 2.801595067 | 2.757679533 | 2.8394573   | 2.846001433 | 2.804862867 | 2.795276433 | 2.995187233 | 2.792499633 |
| "Tspan9"   | 8.4403925   | 7.10219     | 7.700894    | 7.366646    | 7.465566    | 7.827318    | 7.5629845   | 7.34763     |
| "Tspo"     | 9.291740833 | 9.161990333 | 9.200618    | 9.012634667 | 9.026578667 | 9.17349     | 8.860442833 | 9.031691    |
| "Tspyl1"   | 5.46060935  | 5.36917785  | 5.49475915  | 5.19280195  | 5.21985285  | 5.5337236   | 5.81165265  | 5.8008966   |
| "Tspyl4"   | 5.955363    | 5.41414     | 5.1582184   | 5.6365595   | 4.628524    | 5.271806    | 5.2329597   | 4.754919    |
| "Tsr1"     | 7.1578937   | 6.5917835   | 5.6433525   | 5.331716    | 6.7443266   | 6.6076612   | 5.514329    | 5.6083984   |
| "Tsr2"     | 4.73889045  | 4.5473238   | 4.95708675  | 4.4264114   | 4.5954508   | 4.0141928   | 4.7345928   | 4.28516335  |
| "Tssc1"    | 5.3033314   | 5.2819786   | 5.991905    | 5.784921    | 5.2321076   | 5.3651814   | 6.233402    | 5.843279    |
| "Tssc4"    | 5.2811804   | 5.668073    | 4.867591    | 4.388307    | 5.368563    | 5.435385    | 4.8258047   | 4.1629663   |
| "Tssk1"    | 2.369165    | 2.3394814   | 2.3067958   | 2.3012218   | 2.3619838   | 2.3562205   | 2.3573093   | 2.3471      |
| "Tst"      | 8.852906    | 9.41222     | 9.479569    | 9.361734    | 9.4551525   | 8.98681     | 9.885558    | 9.74015     |
| "Tsta3"    | 7.8415413   | 8.254217    | 8.140672    | 7.7602296   | 8.257249    | 8.4325      | 8.087878    | 8.018661    |
| "Tstd1"    | 5.7738085   | 6.8233814   | 8.634405    | 6.9245944   | 5.753606    | 5.261633    | 6.937102    | 7.029103    |
| "Tstd2"    | 7.8069363   | 7.695197    | 7.8063116   | 7.4242105   | 7.8190107   | 7.9923472   | 8.218288    | 7.83443     |
| "Tsx"      | 2.3741636   | 2.3533583   | 2.2848928   | 2.3285642   | 2.3723583   | 2.3627753   | 2.3661318   | 2.359097    |
| "Ttbk2"    | 2.4829862   | 2.4551127   | 2.3880062   | 2.4331894   | 2.4848998   | 2.481329    | 2.4699311   | 2.470172    |
| "Ttc1"     | 6.899734    | 6.7206929   | 6.36322955  | 6.2795097   | 6.3992326   | 6.56766     | 6.0852465   | 6.3137432   |
| "Ttc13"    | 7.7024558   | 8.3342172   | 8.241930167 | 8.490488    | 8.624787733 | 8.670963333 | 8.608558567 | 8.457140667 |
| "Ttc14"    | 4.7417201   | 4.8806921   | 4.835282233 | 4.973226333 | 5.44623     | 5.748743867 | 5.4595949   | 5.4398973   |
| "Ttc15"    | 4.9239974   | 5.1187453   | 5.4003725   | 5.4597254   | 5.2203636   | 5.2493734   | 5.3559494   | 4.7708836   |
| "Ttc17"    | 6.2600384   | 6.1911945   | 6.1402903   | 6.0546308   | 6.1052494   | 6.7216063   | 6.0441866   | 6.0323844   |
| "Ttc19"    | 4.452425    | 4.6015334   | 4.507077    | 4.497324    | 4.2948923   | 4.513961    | 4.519343    | 4.749089    |
| "Ttc23"    | 7.561645    | 8.292466    | 7.3713107   | 8.661015    | 9.342003    | 8.124185    | 7.593388    | 8.9980955   |
| "Ttc27"    | 6.169246    | 5.8223524   | 6.363369    | 6.0639954   | 6.164759    | 6.4241195   | 6.192668    | 6.2854047   |
| "Ttc28"    | 2.98624455  | 2.3795773   | 3.02549255  | 2.95118955  | 2.9745933   | 2.75969665  | 2.9786058   | 2.98948055  |
| "Ttc3"     | 6.036680325 | 5.787171175 | 5.902034525 | 5.8778728   | 5.709216675 | 5.96379415  | 6.26599115  | 5.895384075 |
| "Ttc30a1"  | 3.135406    | 3.2220151   | 3.501105    | 3.0469794   | 3.3133492   | 3.2379756   | 3.9721608   | 3.1233737   |
| "Ttc30b"   | 5.4821305   | 6.4262624   | 6.3664064   | 6.409695    | 6.191661    | 6.2122445   | 7.308572    | 6.450916    |
| "Ttc33"    | 8.349899    | 8.583568    | 8.433456    | 8.588433    | 8.035181    | 8.537116    | 8.11621     | 7.680785    |
| "Ttc35"    | 9.709036    | 9.873768    | 10.024091   | 9.930743    | 9.667076    | 9.654438    | 9.982486    | 9.845352    |
| "Ttc36"    | 12.361563   | 12.769733   | 13.0366535  | 12.943121   | 12.777407   | 12.493539   | 12.901341   | 12.859599   |
| "Ttc39b"   | 5.2581553   | 4.845931375 | 5.049491475 | 5.4022992   | 4.981553825 | 4.96496345  | 4.924645025 | 5.26175465  |
| "Ttc39c"   | 10.205874   | 11.950066   | 8.917139    | 10.998415   | 10.690584   | 11.652123   | 9.685554    | 12.125467   |
| "Ttc39d"   | 2.3777914   | 2.357876    | 2.2402616   | 2.3413782   | 2.4563618   | 2.3735137   | 2.3755245   | 2.3861995   |
| "Ttc4"     | 6.2535965   | 6.100444    | 6.3677798   | 6.2100338   | 6.2217535   | 6.4679525   | 6.19763325  | 6.4951634   |
| "Ttc5"     | 6.472464    | 6.576091    | 6.4907722   | 6.7045574   | 6.3515496   | 6.491699    | 6.6968784   | 6.3246584   |
| "Ttc7b"    | 3.6151185   | 4.1680422   | 3.45271365  | 3.4244627   | 3.5486263   | 3.55226515  | 3.45734165  | 3.48124245  |
| "Ttc8"     | 5.63686     | 5.7254186   | 6.2880845   | 6.0671363   | 5.6694217   | 4.6940928   | 6.5461817   | 6.1811314   |
| "Ttf1"     | 3.3870435   | 3.6684228   | 3.7630384   | 3.94065855  | 3.89084035  | 3.7862444   | 3.6709225   | 3.72526825  |
| "Tti1"     | 4.764915    | 5.1597857   | 5.5345993   | 5.2451487   | 5.373201    | 5.3373656   | 5.5456204   | 5.3201003   |
| "Tti2"     | 3.3162889   | 3.333095    | 3.316889667 | 3.256652867 | 3.611483067 | 3.2756111   | 3.3613607   | 3.522644967 |
| "Tti"      | 3.707951675 | 3.830844525 | 3.66341355  | 3.91493865  | 4.17221225  | 3.752081825 | 3.851189425 | 3.88943605  |
| "Ttil1"    | 3.15260245  | 3.0010822   | 3.4575445   | 3.699981    | 3.21282865  | 3.38544525  | 3.79360835  | 3.58901075  |
| "Ttil3"    | 2.96967565  | 2.77059735  | 2.73935165  | 2.7594259   | 2.8005892   | 2.79074895  | 2.7890386   | 2.7819419   |
| "Ttn"      | 2.6906545   | 2.6682234   | 2.5735936   | 2.6045816   | 2.6866972   | 2.6811986   | 2.657186    | 2.7147121   |
| "Ttpa"     | 13.663676   | 13.804318   | 13.283254   | 13.479031   | 13.908422   | 13.961977   | 13.703053   | 13.460089   |
| "Ttr"      | 15.022455   | 15.197911   | 15.21584967 | 15.25507033 | 15.363711   | 15.20179867 | 15.424717   | 15.25376533 |
| "Ttyh1"    | 2.886565767 | 2.7190765   | 2.5591323   | 2.614125067 | 2.720343167 | 2.7260077   | 2.677641933 | 2.713474433 |
| "Tub"      | 2.9099948   | 2.8809083   | 2.7280693   | 2.7633588   | 2.92565     | 2.9334273   | 2.582801    | 2.9293222   |
| "Tuba-rs1" | 2.1774383   | 2.1528192   | 2.5132124   | 2.1318445   | 2.171657    | 2.1625948   | 2.162003    | 2.1567185   |

|              |             |             |             |             |             |             |             |             |
|--------------|-------------|-------------|-------------|-------------|-------------|-------------|-------------|-------------|
| "Tuba1a"     | 7.063543    | 5.4257145   | 7.9886556   | 6.6879163   | 5.4941807   | 5.5460067   | 7.004021    | 6.638394    |
| "Tuba3a"     | 2.896417    | 2.8743541   | 2.8587341   | 2.7599864   | 2.8820179   | 2.8713963   | 2.8855221   | 2.8675911   |
| "Tuba4a"     | 8.487669    | 8.8252259   | 8.946852733 | 8.287313933 | 8.429408667 | 8.106630733 | 8.502123167 | 8.684753667 |
| "Tuba8"      | 7.547344    | 8.039675    | 8.929478    | 7.5108695   | 6.441588    | 7.797293    | 7.3748484   | 7.0424213   |
| "Tubb2a-ps2" | 2.8193018   | 2.805458667 | 2.7036403   | 2.723911067 | 2.842024433 | 2.810266267 | 2.784295033 | 2.8299762   |
| "Tubb2a"     | 8.3043747   | 7.52673435  | 7.754527    | 5.690816    | 6.0953148   | 5.90507875  | 6.8860879   | 5.4014087   |
| "Tubb2b"     | 3.3299472   | 3.3193402   | 3.2164185   | 3.248064    | 3.3483915   | 3.3863397   | 3.2164636   | 3.470223    |
| "Tubb3"      | 3.0167112   | 3.012651    | 2.865128    | 2.9676971   | 3.0888813   | 3.0914109   | 3.007661    | 3.1047354   |
| "Tubb4b"     | 9.972407    | 10.336383   | 10.208118   | 9.285407    | 9.439434    | 9.378733    | 9.493257    | 9.510024    |
| "Tubb5"      | 7.93626285  | 7.7491835   | 8.675112    | 7.972413    | 7.47576595  | 7.806622    | 7.6990565   | 8.089023    |
| "Tubb6"      | 6.7980685   | 4.3513026   | 4.852526    | 4.319874    | 4.1818986   | 4.0856433   | 4.188774    | 4.0716724   |
| "Tubd1"      | 3.10544     | 3.1232617   | 3.039717    | 3.0557334   | 3.0849466   | 3.081085    | 3.096385    | 3.0774403   |
| "Tubg1"      | 6.6733685   | 6.938838    | 6.8776784   | 7.0170894   | 7.252885    | 7.3303986   | 7.106634    | 6.9388194   |
| "Tubgcp2"    | 3.2796788   | 3.8224957   | 3.7860687   | 3.7931073   | 3.8624473   | 3.7294717   | 4.062717    | 3.9403603   |
| "Tubgcp3"    | 6.132595    | 5.978663    | 5.462774    | 5.960351    | 6.1257963   | 6.206062    | 6.2186155   | 6.115546    |
| "Tubgcp4"    | 5.1366932   | 5.15121415  | 5.208327    | 5.54879775  | 5.1926602   | 5.45190735  | 5.5751603   | 5.6866919   |
| "Tubgcp5"    | 5.174469    | 5.232981    | 5.146232    | 5.26472     | 5.303364    | 5.5610633   | 5.2934523   | 5.87137     |
| "Tufm"       | 5.36116805  | 5.3696471   | 5.55622435  | 5.575873    | 5.4953585   | 5.41993705  | 5.658109    | 5.709807    |
| "Tuft1"      | 3.964737    | 3.937533    | 3.8909593   | 3.8919184   | 3.8293128   | 4.135246    | 3.9535244   | 4.502101    |
| "Tug1"       | 6.51186515  | 6.8888423   | 7.0645124   | 6.6312935   | 6.99733335  | 7.0997363   | 6.9837768   | 6.953083    |
| "Tulp2"      | 2.4990473   | 2.468236    | 2.4006605   | 2.4318357   | 2.5007896   | 2.4904976   | 2.4879372   | 2.4884617   |
| "Tulp3"      | 2.5575519   | 2.5729616   | 2.4771898   | 2.5017328   | 2.5420907   | 2.5263226   | 2.5433319   | 2.5304563   |
| "Tulp4"      | 7.1554485   | 7.8504075   | 7.072012    | 7.560535    | 7.58487425  | 7.9808905   | 7.56455915  | 7.91031475  |
| "Tusc2"      | 6.3080587   | 6.5957637   | 6.131637    | 6.1764774   | 6.7287717   | 6.5091634   | 6.7523394   | 6.4041295   |
| "Tusc3"      | 6.6246463   | 6.751427    | 7.4281306   | 7.1017933   | 6.662825    | 6.624255    | 7.2273517   | 7.005775    |
| "Tut1"       | 3.3822658   | 3.3490846   | 3.3042393   | 3.3180897   | 3.36851     | 3.446779    | 3.0616193   | 3.3523846   |
| "Twf2"       | 4.919763    | 4.17788415  | 5.60350835  | 5.0857715   | 4.66245965  | 4.6400421   | 5.34615385  | 4.95355205  |
| "Twist1"     | 3.1184442   | 3.0815916   | 3.036585    | 2.960495    | 3.1819258   | 3.1211038   | 3.0939052   | 3.0860777   |
| "Twist2"     | 2.5977173   | 2.5652947   | 2.4845998   | 2.5536685   | 2.5842254   | 2.5785658   | 2.579198    | 2.578841    |
| "Twsg1"      | 4.77153065  | 5.0285945   | 5.18078515  | 5.29517415  | 4.99054145  | 4.9495206   | 5.1110331   | 5.0374648   |
| "Txlnb"      | 2.86003195  | 2.83572805  | 2.7533722   | 2.79178875  | 2.87229105  | 2.873754    | 2.84377015  | 2.8500745   |
| "Txlng"      | 8.473614    | 8.080535    | 7.5034914   | 7.6132064   | 8.075871    | 8.269678    | 7.92324     | 8.411034    |
| "Txn1"       | 7.605015    | 7.5493783   | 8.02683725  | 7.8894286   | 7.49831155  | 7.3394941   | 7.70522165  | 7.61550365  |
| "Txn2"       | 8.736287167 | 9.077346667 | 8.989243    | 8.73774     | 9.019792333 | 8.437473667 | 8.767493333 | 8.662164233 |
| "Txndc11"    | 7.9523892   | 7.722909    | 6.9838886   | 6.832861    | 7.740041    | 6.515321    | 6.3798823   | 7.0626802   |
| "Txndc12"    | 7.9005046   | 7.6978073   | 7.8786044   | 7.86999     | 7.7719393   | 7.8983045   | 8.044169    | 7.9272876   |
| "Txndc16"    | 4.50872     | 4.0840645   | 4.9834704   | 4.7049284   | 4.2483373   | 4.164565    | 5.098983    | 4.4780593   |
| "Txndc17"    | 8.803427175 | 8.951863875 | 8.5822657   | 8.7773009   | 8.549664075 | 8.6552608   | 8.7521207   | 8.556921325 |
| "Txndc5"     | 7.8776697   | 8.9765585   | 9.454389    | 9.1479435   | 9.6701935   | 8.843303    | 9.1347735   | 9.4707625   |
| "Txndc8"     | 2.8979034   | 2.8727746   | 2.7631326   | 2.8100505   | 2.9003043   | 2.8986578   | 2.8715477   | 2.895842    |
| "Txndc9"     | 9.31507225  | 9.525124    | 9.4329395   | 9.1731635   | 9.389044    | 9.432336    | 9.8186295   | 9.302913    |
| "Txnip"      | 10.474244   | 8.1540425   | 7.2171505   | 8.0207338   | 8.80273365  | 8.713154    | 7.8582315   | 8.57113     |
| "Txnl1"      | 6.70063925  | 6.904207517 | 6.66362975  | 6.548465517 | 6.71032125  | 6.686555983 | 6.59285955  | 6.631161017 |
| "Txnl4a"     | 5.6304655   | 5.700405    | 5.534148    | 5.6610441   | 6.0103861   | 5.933776    | 5.52049625  | 5.8362082   |
| "Txnrd1"     | 5.535970567 | 5.466208633 | 5.577663167 | 5.4585561   | 5.296765    | 5.0882317   | 5.2646034   | 5.365229467 |
| "Txnrd2"     | 5.73348485  | 5.93268895  | 5.6562425   | 6.0883868   | 6.29986025  | 6.362518    | 6.7325175   | 6.42262555  |
| "Txnrd3"     | 5.3205572   | 6.169500967 | 5.09355533  | 5.235731033 | 5.295648567 | 5.2286817   | 5.128143967 | 5.247906833 |
| "Tyk2"       | 5.7802467   | 5.8082976   | 6.7198305   | 6.6469965   | 5.7301393   | 5.7533226   | 6.427658    | 6.4441075   |
| "Tyms-ps"    | 2.830391    | 2.8252172   | 2.68609     | 2.7580633   | 2.8410132   | 2.8377542   | 2.8111043   | 2.853356    |
| "Tyms"       | 3.18853105  | 3.12046425  | 3.124389775 | 3.250732925 | 3.20571565  | 3.184318125 | 3.2544759   | 3.267341575 |
| "Tyr"        | 2.870656    | 2.8451892   | 2.71039735  | 2.78234015  | 2.8990047   | 2.9081141   | 2.8300561   | 2.87797115  |
| "Tyro3"      | 2.3898834   | 2.562855    | 2.3008063   | 2.3371844   | 2.38683765  | 2.3757013   | 2.37818155  | 2.392722    |
| "Tyrobp"     | 11.2709055  | 9.478072    | 11.68017    | 10.855556   | 10.0540495  | 9.791614    | 10.542806   | 10.07034    |
| "Tysnd1"     | 7.4743204   | 7.7229247   | 7.491023    | 7.6593704   | 8.25995     | 7.876462    | 7.7652116   | 7.2680135   |
| "Tyw1"       | 4.6293797   | 4.992151    | 4.646881    | 4.8482437   | 4.383951    | 4.94649     | 4.550111    | 5.038603    |
| "U05342"     | 8.56699     | 8.601347    | 7.8556304   | 8.405393    | 8.575788    | 8.516113    | 7.85149     | 8.583292    |
| "U2af1"      | 10.877145   | 10.627757   | 9.931647    | 9.603336    | 10.373342   | 10.405005   | 10.009898   | 9.852011    |
| "U2af1l4"    | 6.885024    | 6.7709737   | 7.021639    | 7.3187017   | 6.9620495   | 7.1888733   | 7.4552526   | 7.065774    |
| "U2af2"      | 4.827096    | 5.2575765   | 5.064616    | 5.070426    | 5.1253815   | 5.2380257   | 5.067315    | 5.2079186   |
| "Uap1"       | 6.64683522  | 6.65137968  | 6.440381    | 6.42577376  | 6.8330894   | 6.45491616  | 6.62295692  | 6.60790424  |
| "Uap1l1"     | 5.016712    | 4.2471037   | 5.8744426   | 5.120419    | 4.703745    | 4.990942    | 4.585081    | 5.1598325   |
| "Uba1"       | 7.4692483   | 7.9573097   | 8.197133    | 7.876198    | 8.001404    | 7.710643    | 7.989456    | 8.080757    |
| "Uba2"       | 9.17025325  | 9.055242125 | 8.9173195   | 8.715063875 | 8.804904375 | 9.02953875  | 9.0592945   | 9.11329875  |
| "Uba3"       | 8.3777531   | 8.276991333 | 8.032647233 | 7.948438667 | 8.195731333 | 8.420025167 | 8.292544667 | 8.3767467   |
| "Uba5"       | 8.504179    | 8.56651     | 8.882539    | 8.59288     | 9.035187    | 8.422429    | 8.670981    | 8.657112    |
| "Uba52"      | 13.7845335  | 13.77071    | 13.726795   | 13.584719   | 13.440488   | 13.496573   | 13.456034   | 13.620529   |
| "Uba7"       | 4.3734451   | 3.668303933 | 5.766962767 | 5.3623165   | 4.107810667 | 3.727393633 | 4.668005333 | 4.792810333 |
| "Ubac1"      | 7.640557    | 8.260546    | 7.3537416   | 7.680256    | 8.153365    | 8.228804    | 7.463875    | 8.049575    |
| "Ubac2"      | 6.948249    | 6.8872924   | 6.92973685  | 6.8601575   | 6.8086398   | 6.9403676   | 6.81213     | 7.0936028   |
| "Ubp1"       | 7.3089933   | 7.64323975  | 6.7389227   | 7.02125645  | 7.266391    | 7.17769005  | 6.60047915  | 7.3651725   |
| "Ubp2"       | 5.0468493   | 5.1937246   | 4.964917    | 5.082265    | 5.135512    | 5.070491    | 4.9246426   | 5.4241214   |
| "Ubp2l1"     | 4.49054646  | 4.61143466  | 4.4490491   | 4.48064024  | 4.55645262  | 4.54895916  | 4.50314782  | 4.5339233   |
| "Ubc"        | 14.02798625 | 13.35820675 | 13.6162665  | 13.30809075 | 13.48091975 | 13.39854338 | 13.44074025 | 13.2836385  |
| "Ubd"        | 3.0972033   | 4.12897     | 6.265971    | 7.125744    | 2.502698    | 2.4830935   | 2.6691191   | 2.926149    |
| "Ube1y1"     | 2.401188    | 2.3770912   | 2.33103     | 2.3331661   | 2.397487    | 2.387208    | 2.3999758   | 2.384471    |
| "Ube2a"      | 9.1565865   | 9.18553185  | 9.4892325   | 9.3130665   | 9.30421     | 9.44579725  | 9.37494725  | 9.1369725   |
| "Ube2b"      | 10.8719075  | 10.4341695  | 10.218234   | 10.541324   | 10.065005   | 10.451266   | 10.3980955  | 10.279478   |
| "Ube2c"      | 4.085525    | 3.040508    | 3.4198935   | 3.2967732   | 3.3732398   | 3.1794243   | 3.7847793   | 3.0447636   |
| "Ube2d1"     | 4.4434752   | 5.435235    | 5.2569656   | 5.2910533   | 4.6799365   | 5.1860056   | 5.289822    | 4.815899    |
| "Ube2d2a"    | 8.9186011   | 9.180020825 | 8.543021    | 8.7291069   | 8.8509269   | 8.8831194   | 8.88314265  | 8.809756625 |
| "Ube2d2b"    | 2.7319045   | 2.7037468   | 2.5928836   | 2.6585128   | 2.739718    | 2.7373857   | 2.7018373   | 2.7351565   |

|           |             |             |             |             |             |             |             |             |
|-----------|-------------|-------------|-------------|-------------|-------------|-------------|-------------|-------------|
| "Ube2d3"  | 9.659650714 | 9.807708429 | 9.709464086 | 9.710512371 | 9.918435286 | 9.802341214 | 9.780677643 | 9.796297771 |
| "Ube2e2"  | 7.9631033   | 9.102521    | 8.444844    | 8.319835    | 9.174732    | 8.76667     | 8.699229    | 8.54375     |
| "Ube2e3"  | 6.6290971   | 6.93890565  | 6.7194641   | 6.9558678   | 6.75478275  | 6.9113964   | 6.87933015  | 6.965372    |
| "Ube2f"   | 8.861455925 | 8.748510925 | 8.73030825  | 8.46361     | 8.596245    | 8.609796575 | 8.4295921   | 8.471987625 |
| "Ube2g1"  | 9.840108    | 10.219917   | 9.851962    | 10.306008   | 9.955661    | 10.380384   | 9.863061    | 10.215425   |
| "Ube2g2"  | 5.5518485   | 5.3807167   | 5.003981    | 4.9301605   | 5.304024    | 5.3036186   | 4.8957107   | 4.9014637   |
| "Ube2h"   | 8.609998    | 8.587625    | 8.385447    | 8.729741    | 8.446815    | 7.940446    | 8.650311    | 8.533189    |
| "Ube2i"   | 4.720836133 | 4.893054333 | 4.775541433 | 4.8159433   | 5.025443167 | 4.882422067 | 5.029074233 | 4.908854967 |
| "Ube2j1"  | 8.131921    | 8.0397308   | 7.4961      | 7.4122475   | 7.59090715  | 7.872116    | 7.33396325  | 7.52137085  |
| "Ube2j2"  | 9.284948    | 8.902884    | 8.274705    | 8.345139    | 8.562476    | 8.661667    | 8.021256    | 8.648267    |
| "Ube2k"   | 7.7048085   | 8.3405247   | 7.5475645   | 7.50577415  | 7.65067505  | 7.759168    | 7.66499625  | 7.69204315  |
| "Ube2l6"  | 5.3547482   | 4.394243    | 6.553437    | 6.425646    | 4.8412194   | 4.2653313   | 6.0372434   | 5.4006753   |
| "Ube2m"   | 6.725926    | 6.9342313   | 6.772252    | 6.7225466   | 6.8110847   | 7.0734267   | 6.788021    | 7.2151785   |
| "Ube2o"   | 2.458336    | 2.2766123   | 2.3307567   | 2.4398708   | 2.4299283   | 2.3846984   | 2.3978324   | 2.379838    |
| "Ube2r2"  | 10.077697   | 9.884421    | 9.90575     | 10.42792    | 10.0988865  | 10.169161   | 10.605862   | 10.456444   |
| "Ube2s"   | 6.3312975   | 6.2957288   | 6.0283755   | 5.8740603   | 5.9708132   | 6.3017166   | 5.8599449   | 6.1280791   |
| "Ube2t"   | 2.6800325   | 2.6455412   | 2.603186    | 2.6063075   | 2.5673308   | 2.6755705   | 3.010267    | 3.1347783   |
| "Ube2v1"  | 7.0609026   | 7.230962    | 7.043313    | 7.2045684   | 6.9774966   | 7.073337    | 7.125167    | 6.9722513   |
| "Ube2v2"  | 8.065678    | 6.95017135  | 7.2644825   | 6.866451    | 7.1852719   | 6.7874085   | 7.17757335  | 6.933308    |
| "Ube2w"   | 6.408026    | 6.3371063   | 6.1149805   | 6.26715725  | 6.15460685  | 6.3776075   | 6.3658685   | 6.483211    |
| "Ube2z"   | 7.6185427   | 7.331293    | 7.552808    | 7.3683      | 7.28718     | 7.71607     | 7.352317    | 7.444262    |
| "Ube3a"   | 6.651243    | 6.665177433 | 6.4782511   | 6.4854512   | 6.739420567 | 7.138824233 | 6.909631567 | 6.9887881   |
| "Ube3b"   | 6.143013    | 6.197088    | 6.0729957   | 6.3956585   | 6.17293     | 6.225584    | 6.2433505   | 6.39972     |
| "Ube3c"   | 6.25750335  | 7.08890035  | 6.7670798   | 6.83787375  | 6.7751155   | 6.7377523   | 6.5966861   | 6.7254855   |
| "Ube4a"   | 3.699527667 | 4.028734833 | 4.016453767 | 4.126676933 | 4.087944267 | 3.999078133 | 3.7857268   | 4.171920533 |
| "Ube4b"   | 6.2068652   | 5.8661678   | 5.88585835  | 6.3132345   | 6.13293375  | 6.42714505  | 5.90897605  | 6.1400553   |
| "Ubfd1"   | 7.32369735  | 7.56744685  | 7.75124905  | 7.3487335   | 7.67065525  | 7.69932665  | 7.33148485  | 7.4627777   |
| "Ubiad1"  | 4.3392596   | 5.364813    | 5.3120937   | 5.073694    | 4.985606    | 5.082424    | 4.4491167   | 4.7379217   |
| "Ubl3"    | 9.609899    | 9.193033    | 9.294465    | 9.204113    | 9.201839    | 9.522203    | 9.112516    | 9.1871195   |
| "Ubl4"    | 7.670499    | 7.97650145  | 7.82120025  | 7.64783835  | 7.69966315  | 7.57404705  | 7.523872    | 7.5643577   |
| "Ubl4b"   | 2.3957071   | 2.3895527   | 2.3055135   | 2.3772548   | 2.38293525  | 2.3806361   | 2.38251665  | 2.38521565  |
| "Ubl5"    | 4.99914905  | 4.56198895  | 4.6096419   | 4.5714985   | 4.5736303   | 4.5020282   | 4.5921693   | 4.56775295  |
| "Ubl7"    | 6.0683856   | 6.707873    | 6.3657794   | 6.65037     | 6.7617326   | 6.454691    | 6.597549    | 6.832666    |
| "Ublcp1"  | 7.07704215  | 7.631274725 | 6.648369275 | 7.0587095   | 7.58764575  | 7.59018325  | 7.132256075 | 7.345816275 |
| "Ubn1"    | 3.7030942   | 3.664823    | 3.6249697   | 3.4304805   | 3.6866496   | 4.097646    | 3.5490308   | 3.6695683   |
| "Ubox5"   | 3.4498172   | 3.8321047   | 3.3139932   | 3.474445    | 3.3822765   | 3.4071324   | 3.425351    | 3.385704    |
| "Ubp1"    | 8.06967085  | 8.186456    | 7.68779985  | 7.95420185  | 8.0894048   | 8.218423    | 8.01542215  | 7.986185    |
| "Ubqln1"  | 8.8970823   | 8.97581285  | 8.758143    | 8.807185    | 8.91016575  | 9.298259    | 9.13232365  | 8.96805475  |
| "Ubqln2"  | 5.93633485  | 5.8443442   | 5.81969565  | 5.8683327   | 5.79948365  | 5.95303815  | 5.98706515  | 5.75573165  |
| "Ubqln4"  | 6.325063    | 6.4330907   | 6.4033666   | 6.0395727   | 6.7758083   | 7.230867    | 6.6778107   | 6.2520466   |
| "Ubr1"    | 5.537002    | 5.6917125   | 5.61729985  | 5.38505165  | 5.3893853   | 5.38981035  | 5.8106961   | 5.45034965  |
| "Ubr2"    | 6.683065    | 6.736901    | 6.024977    | 6.2413034   | 6.3522425   | 7.0456195   | 5.8490014   | 6.0483437   |
| "Ubr3"    | 7.3783355   | 8.491319    | 7.5924096   | 8.038626    | 8.255191    | 8.225425    | 8.5457535   | 8.137992    |
| "Ubr4"    | 7.65797     | 7.358216    | 7.6336837   | 7.6612177   | 7.340948    | 7.625238    | 7.488881    | 7.4812083   |
| "Ubr5"    | 9.341019    | 9.956306    | 9.417426    | 9.655079    | 9.965826    | 9.987931    | 9.423519    | 9.819675    |
| "Ubr7"    | 5.50021435  | 5.1896465   | 4.9497292   | 5.13443985  | 5.18120995  | 5.3294184   | 4.7972      | 5.1325508   |
| "Ubtld1"  | 3.0324345   | 3.0700111   | 2.9149992   | 2.9337041   | 3.015948    | 3.105356    | 2.8067598   | 3.0013669   |
| "Ubtlf"   | 6.41978285  | 6.60122325  | 6.73112535  | 6.5998968   | 6.6652907   | 6.8963835   | 6.6255035   | 6.2420693   |
| "Ubxn1"   | 10.98889    | 11.347664   | 11.510658   | 11.286587   | 10.7609005  | 11.476415   | 12.021287   | 10.857287   |
| "Ubxn10"  | 2.4646174   | 2.447182667 | 2.379924    | 2.401986067 | 2.464335467 | 2.4623478   | 2.447336067 | 2.465430767 |
| "Ubxn2a"  | 9.879773    | 9.76453825  | 8.51476785  | 8.566357    | 9.2125345   | 9.35949875  | 8.90623     | 9.0132535   |
| "Ubxn2b"  | 4.778367    | 4.5073657   | 5.3276706   | 4.644736    | 4.5389795   | 4.416002    | 4.5107718   | 3.9508529   |
| "Ubxn4"   | 9.433196    | 9.9969995   | 9.913465    | 9.657247    | 10.22588367 | 9.953236667 | 9.764050667 | 9.627994667 |
| "Ubxn6"   | 7.769262    | 8.412397    | 7.378747    | 7.5865817   | 7.4681582   | 7.8159475   | 7.3908634   | 7.49312     |
| "Ubxn8"   | 6.3951206   | 7.1874933   | 6.6196375   | 6.543282    | 6.1537876   | 5.9293804   | 6.2806215   | 6.464409    |
| "Uchl3"   | 8.164194    | 8.530638    | 8.647304    | 8.535609    | 8.47382     | 9.0002365   | 9.235819    | 8.766102    |
| "Uchl4"   | 2.6066854   | 2.616949    | 2.4817429   | 2.540852    | 2.6117847   | 2.6394043   | 2.5729415   | 2.6018393   |
| "Uchl5"   | 5.76620795  | 5.838585    | 5.48801     | 5.9793031   | 5.83019285  | 5.99308385  | 5.8872598   | 5.8503075   |
| "Uck1"    | 6.6157446   | 7.290552    | 6.251451    | 7.1163716   | 8.069709    | 7.0036364   | 7.799984    | 6.666865    |
| "Uck2"    | 3.70031725  | 3.9284466   | 3.6137823   | 3.1735048   | 2.99672135  | 3.0393564   | 2.7306088   | 3.2040761   |
| "Uckl1"   | 5.9547987   | 6.5044928   | 6.5026374   | 6.243816    | 6.5878234   | 6.8119206   | 6.558563    | 6.3260055   |
| "Ucp2"    | 6.055391    | 4.68456     | 4.7410283   | 4.666838    | 4.714855    | 4.701742    | 4.705204    | 4.6905007   |
| "Ucp3"    | 2.3233282   | 2.29990255  | 2.22722745  | 2.276845    | 2.3165937   | 2.45196745  | 2.31709525  | 2.3065641   |
| "Uevld"   | 4.1053443   | 4.282369    | 4.515639    | 4.8716702   | 4.1896763   | 3.9910023   | 5.205327    | 5.080428    |
| "Ufc1"    | 9.671901    | 10.454195   | 10.415222   | 10.394368   | 10.03413    | 9.980965    | 10.034552   | 10.1668     |
| "Ufd1l"   | 7.40803     | 7.56646395  | 7.232638    | 7.1517756   | 7.5583455   | 7.405852    | 7.38992765  | 7.3190175   |
| "Ufm1"    | 5.75045995  | 5.920429875 | 5.7414781   | 5.5915605   | 5.899911575 | 5.574899975 | 5.751466375 | 5.7239882   |
| "Ufsp1"   | 2.3694706   | 3.1633136   | 2.5826988   | 3.0607347   | 3.6093812   | 3.844148    | 2.9279754   | 3.0795224   |
| "Ufsp2"   | 9.321106    | 9.343269    | 9.437793    | 9.643809    | 9.91344     | 9.67156     | 9.570715    | 9.611614    |
| "Ugcg"    | 4.8715885   | 4.4577899   | 4.771105233 | 4.459811933 | 4.863789567 | 4.951663567 | 4.9212228   | 4.8634097   |
| "Ugdh"    | 9.360217    | 9.851461    | 11.38218    | 10.797223   | 9.643315    | 9.154937    | 9.892921    | 10.221153   |
| "Uggt1"   | 5.865567    | 6.1808467   | 6.5851674   | 6.445914    | 7.0922575   | 6.6301804   | 6.750813    | 6.8289757   |
| "Uggt2"   | 2.6697102   | 2.642945    | 2.6703691   | 2.6338286   | 2.6677504   | 2.6609735   | 2.739808    | 2.6540332   |
| "Ugp2"    | 10.4561638  | 10.8939391  | 11.411674   | 11.7318667  | 11.5266     | 10.2740224  | 11.291531   | 11.5498772  |
| "Ugt2a1"  | 2.5357902   | 2.505387    | 2.4586809   | 2.4677334   | 2.5409677   | 2.5306678   | 2.518924    | 2.5751147   |
| "Ugt2a3"  | 12.1332245  | 12.649664   | 11.788632   | 12.866949   | 12.550768   | 12.594325   | 12.66185    | 12.83485    |
| "Ugt2b1"  | 11.804913   | 12.5324955  | 11.826204   | 12.780834   | 11.362238   | 11.83116    | 11.55316    | 12.16783    |
| "Ugt2b34" | 11.5134555  | 11.39556525 | 12.5070215  | 12.0769925  | 11.7554665  | 11.0703485  | 11.8760175  | 12.27768    |
| "Ugt2b37" | 7.4225655   | 9.673351    | 4.8489447   | 8.9391985   | 6.742168    | 9.021369    | 6.0776467   | 7.758421    |
| "Ugt2b38" | 5.563176    | 10.140636   | 3.610997    | 8.540987    | 3.8655107   | 9.359312    | 3.8753252   | 10.563015   |
| "Ugt2b5"  | 13.189776   | 13.800502   | 13.462524   | 14.137759   | 13.832303   | 13.688357   | 13.849344   | 14.072314   |

|             |             |             |             |             |             |             |             |             |
|-------------|-------------|-------------|-------------|-------------|-------------|-------------|-------------|-------------|
| "Ugt3a1"    | 7.2870572   | 9.4902345   | 8.0040965   | 9.5522625   | 9.241441    | 9.2775055   | 9.544766    | 9.1310815   |
| "Ugt3a2"    | 12.589727   | 12.971566   | 12.68026    | 13.214712   | 13.192487   | 13.214983   | 12.88985    | 12.939479   |
| "Ugt8a"     | 2.4043185   | 2.37442585  | 2.3226516   | 2.3430195   | 2.4587185   | 2.3902658   | 2.39620825  | 2.3859755   |
| "Uhm1"      | 5.389462    | 5.5210718   | 5.49991655  | 5.5941513   | 5.5600935   | 5.3582715   | 5.5997759   | 5.52012585  |
| "Uhrf1"     | 2.8904552   | 2.8687594   | 3.4086921   | 2.8308907   | 2.8882036   | 2.9221988   | 2.8922222   | 2.786126    |
| "Uhrf1bp1"  | 4.974758    | 5.990944    | 5.4165545   | 5.864909    | 5.861274    | 5.7981386   | 5.024944    | 5.664314    |
| "Uhrf1bp1l" | 6.8740252   | 7.321601667 | 6.791734133 | 6.865575    | 7.208406    | 7.042860667 | 6.7389506   | 6.933342    |
| "Uimc1"     | 8.638678    | 9.045506    | 8.545437    | 8.734529    | 8.956256    | 9.27121     | 8.598705    | 8.979982    |
| "Ulk1"      | 5.8947241   | 5.8259381   | 5.5777452   | 6.0524133   | 6.122151    | 5.96325355  | 5.9217506   | 6.06573815  |
| "Ulk2"      | 7.662976567 | 7.6650548   | 7.8353961   | 8.106986167 | 7.4917172   | 7.759949333 | 8.181008333 | 8.560002333 |
| "Umod"      | 2.7493114   | 2.73459295  | 2.63700915  | 2.67277965  | 2.7583246   | 2.7591497   | 2.71230015  | 2.81977795  |
| "Umps"      | 4.839125867 | 4.877240133 | 5.777217    | 5.786890933 | 5.783956833 | 5.380009    | 5.737944667 | 5.764179467 |
| "Unc119"    | 5.314919    | 5.582376    | 5.5031114   | 5.278606    | 5.4499      | 5.4039893   | 5.462849    | 5.8016887   |
| "Unc119b"   | 6.98604785  | 7.03078365  | 6.6613857   | 6.386435    | 7.1058235   | 7.2056955   | 6.9063778   | 6.9449095   |
| "Unc13b"    | 5.5908346   | 4.5128055   | 4.9284544   | 4.7912483   | 5.658665    | 5.445185    | 3.9473147   | 5.0301323   |
| "Unc45a"    | 6.683116    | 6.2757059   | 5.63729965  | 5.7410724   | 6.3116648   | 6.3744817   | 5.6987617   | 5.85154485  |
| "Unc50"     | 7.481161667 | 7.4921027   | 7.373064733 | 7.405333333 | 7.428390233 | 7.430867467 | 7.316832833 | 7.349518867 |
| "Unc5b"     | 2.406732    | 2.3801043   | 2.3212411   | 2.363454    | 2.399014    | 2.476661    | 2.4040158   | 2.3843155   |
| "Unc93b1"   | 6.3703957   | 5.3577805   | 6.6004834   | 5.920809    | 5.7114563   | 5.5660872   | 5.927605    | 5.742979    |
| "Uncx"      | 2.4054768   | 2.3672094   | 2.3197527   | 2.3275492   | 2.4010293   | 2.3856564   | 2.3903942   | 2.384142    |
| "Ung"       | 7.2973895   | 4.80678     | 4.9959807   | 5.161134    | 5.677142    | 6.7747054   | 5.172724    | 5.7009296   |
| "Unk"       | 3.7763448   | 3.744118    | 3.763262    | 3.667521    | 3.786287    | 3.7654886   | 3.7130964   | 3.646145    |
| "Uox"       | 13.342717   | 12.891088   | 13.40489    | 14.122329   | 13.771778   | 13.723756   | 13.821998   | 14.131488   |
| "Upb1"      | 11.738634   | 12.290843   | 12.271281   | 12.266937   | 11.957963   | 11.7681     | 11.842034   | 12.281391   |
| "Upf1"      | 4.2036095   | 4.211118    | 3.8858528   | 4.351964    | 4.5629406   | 4.3712873   | 4.200704    | 4.2094426   |
| "Upf2"      | 7.7973137   | 7.41892     | 7.7940617   | 7.634017    | 8.016707    | 8.290698    | 7.782604    | 7.8597584   |
| "Upf3b"     | 7.6269875   | 7.5812297   | 7.1691413   | 7.2676334   | 7.4393034   | 8.03026     | 7.3231335   | 7.9818206   |
| "Upk1a"     | 2.5178182   | 2.4854214   | 2.4600158   | 2.464171    | 2.505686    | 2.4963932   | 2.4997702   | 2.4922214   |
| "Upk3b"     | 2.82232315  | 2.3244243   | 2.9232866   | 2.2939904   | 2.34722695  | 2.2744814   | 2.3097106   | 2.37991835  |
| "Upp1"      | 2.228409    | 2.1555066   | 2.4028666   | 3.398497    | 2.1760619   | 2.06529     | 2.7141607   | 2.7108703   |
| "Upp2"      | 11.958546   | 12.6928985  | 11.789302   | 13.0847615  | 11.3909805  | 12.472789   | 11.5657515  | 12.4671085  |
| "Uqcc"      | 5.48840435  | 5.8772056   | 5.847523    | 6.2414963   | 6.2584469   | 5.53555185  | 6.352335    | 6.28055465  |
| "Uqcr11"    | 11.265873   | 11.758564   | 11.629418   | 11.624933   | 11.649144   | 11.512512   | 11.613181   | 11.79668    |
| "Uqcrb"     | 12.568275   | 12.832148   | 12.8059445  | 12.862215   | 12.8176905  | 12.7696545  | 13.1386565  | 12.989461   |
| "Uqcrc1"    | 9.6287365   | 10.297159   | 10.056955   | 10.342801   | 10.414625   | 10.202189   | 10.282331   | 10.618264   |
| "Uqcrc2"    | 12.1976375  | 12.3312145  | 12.2873765  | 12.398022   | 12.524458   | 12.466403   | 12.7802665  | 12.711304   |
| "Uqcrf1"    | 11.637405   | 11.902464   | 11.613222   | 11.617266   | 11.924904   | 11.822869   | 11.871827   | 11.839327   |
| "Uqcrh"     | 11.636068   | 11.7324705  | 11.51833    | 11.636558   | 11.642246   | 11.638745   | 11.651447   | 11.779072   |
| "Uqcrq"     | 7.310411    | 7.52080165  | 7.3303709   | 7.4000671   | 7.4768225   | 7.4753681   | 7.4723524   | 7.4816742   |
| "Urm1"      | 2.997501567 | 3.2121967   | 2.8568487   | 3.143099333 | 3.119465167 | 3.195730667 | 2.930955967 | 3.239379467 |
| "Uroc1"     | 8.4790585   | 9.03478325  | 9.47684335  | 10.0395163  | 9.726092    | 9.057616    | 9.8691588   | 9.787471    |
| "Urod"      | 8.142729    | 8.454603    | 8.449008    | 8.54048     | 8.935954    | 8.776888    | 8.837747    | 8.884168    |
| "Uros"      | 7.276565    | 8.074144    | 8.627274    | 8.513666    | 8.04987     | 8.454483    | 9.265377    | 7.779408    |
| "Use1"      | 9.9443885   | 10.1928035  | 9.9413675   | 9.648067    | 9.709441    | 10.021787   | 9.4574965   | 9.5741705   |
| "Usf1"      | 4.2889122   | 4.099334    | 4.249147    | 4.28046905  | 4.202298    | 4.0860281   | 4.05425485  | 4.2905448   |
| "Ushbp1"    | 4.980322    | 4.5768824   | 4.904948    | 5.619954    | 5.170458    | 5.0115137   | 5.5586524   | 5.15086     |
| "Usmg2"     | 3.4306376   | 3.5029027   | 3.2073092   | 3.3399649   | 3.5325382   | 3.5387628   | 3.385733    | 3.576175    |
| "Usmg5"     | 12.061449   | 12.216948   | 12.172304   | 12.147841   | 12.235782   | 12.156107   | 12.207641   | 12.345681   |
| "Uso1"      | 8.909296    | 9.84831     | 9.587561    | 9.504587    | 10.303122   | 9.992469    | 9.58144     | 9.678482    |
| "Usp1"      | 7.575992333 | 7.533072867 | 6.743386267 | 6.7546648   | 6.972519    | 7.3754858   | 6.8366452   | 6.8942728   |
| "Usp10"     | 7.6646605   | 8.616962    | 8.161035    | 8.01512     | 8.683663    | 8.5518265   | 8.505604    | 8.838159    |
| "Usp12"     | 2.4775245   | 2.4443018   | 2.4040623   | 2.4201388   | 2.465712    | 2.4571211   | 2.455704    | 2.4669      |
| "Usp14"     | 7.397906433 | 7.477269733 | 7.4142961   | 7.446076933 | 7.207700233 | 7.623042133 | 7.6305745   | 7.375096333 |
| "Usp15"     | 7.437654    | 7.3554254   | 6.8530216   | 6.499871    | 7.1366596   | 7.523511    | 7.0068903   | 7.112277    |
| "Usp16"     | 8.477526    | 8.412613    | 7.674405    | 8.1720915   | 8.136698    | 8.475685    | 8.11904     | 8.245875    |
| "Usp18"     | 9.07105     | 9.558527    | 9.872092    | 10.157078   | 7.5685086   | 8.122119    | 8.655848    | 8.76723     |
| "Usp19"     | 7.38126875  | 7.3166565   | 7.2064845   | 7.22576535  | 7.357956    | 7.658239    | 7.3040332   | 7.37589475  |
| "Usp2"      | 7.53305925  | 8.9920885   | 6.72120815  | 8.05700115  | 8.9880095   | 8.3861408   | 6.9994275   | 8.61607315  |
| "Usp20"     | 3.7401597   | 3.5908365   | 4.005395    | 3.6491737   | 3.6687086   | 4.3559494   | 3.6531148   | 3.883349    |
| "Usp21"     | 5.300721    | 5.4942303   | 5.8983326   | 5.7626452   | 5.544023    | 5.5374417   | 5.744585    | 5.5378423   |
| "Usp24"     | 7.47907235  | 7.16022485  | 7.6279895   | 7.6468973   | 7.1844458   | 7.41654385  | 7.6842642   | 7.56698085  |
| "Usp25"     | 9.401037    | 8.829014    | 8.965211    | 9.113093    | 8.930711    | 8.937776    | 9.349227    | 8.904966    |
| "Usp27x"    | 2.5311875   | 2.5009842   | 2.4486244   | 2.4765508   | 2.5210814   | 2.5209665   | 2.5146747   | 2.5168529   |
| "Usp29"     | 2.750112    | 2.716566    | 2.619412    | 2.6662655   | 2.7554317   | 2.7659364   | 2.7281394   | 2.764377    |
| "Usp3"      | 7.837729    | 8.060904    | 7.0735192   | 7.4633897   | 7.2011998   | 7.87372875  | 7.23169525  | 7.542117    |
| "Usp33"     | 8.970742    | 8.335861    | 7.7543955   | 8.185951    | 8.1036415   | 8.352787    | 8.424542    | 7.890937    |
| "Usp34"     | 6.78612565  | 6.68301735  | 6.32717625  | 6.407501    | 6.58980015  | 6.67799015  | 6.8545245   | 6.9589105   |
| "Usp36"     | 5.35320275  | 4.7647173   | 4.3014002   | 4.6863892   | 5.0447762   | 4.829273    | 4.4431083   | 5.09330815  |
| "Usp38"     | 6.7243114   | 6.8445926   | 6.641023    | 6.435267    | 7.1374784   | 6.6667404   | 6.6243653   | 6.4358015   |
| "Usp39"     | 7.693363    | 7.782198    | 7.4453925   | 7.4818325   | 7.70136075  | 7.788599    | 7.39771815  | 7.69836035  |
| "Usp4"      | 7.4711924   | 7.663415    | 7.7550645   | 8.037128    | 7.9229784   | 7.729925    | 7.9441986   | 8.022072    |
| "Usp43"     | 2.6032381   | 2.57756745  | 2.49283     | 2.5321586   | 2.6013461   | 2.5970645   | 2.5834589   | 2.61323075  |
| "Usp45"     | 5.9200657   | 5.789153    | 5.8896749   | 6.180462267 | 6.1105329   | 6.1894481   | 6.2811976   | 6.3595216   |
| "Usp47"     | 9.1373125   | 9.42960375  | 9.1060265   | 9.123525    | 9.2240665   | 9.387043    | 9.126562    | 9.3129775   |
| "Usp48"     | 6.093908867 | 6.04561     | 6.251725233 | 6.084720267 | 6.3227098   | 6.064189567 | 6.250544167 | 6.105624667 |
| "Usp49"     | 2.5709558   | 2.478222    | 3.0313563   | 2.9160535   | 2.340562    | 2.4565732   | 2.3473592   | 2.485022    |
| "Usp5"      | 5.6043916   | 5.852563    | 5.707723    | 5.651644    | 6.023971    | 5.2238255   | 6.031371    | 6.1103435   |
| "Usp53"     | 5.709249    | 5.5156636   | 5.38437     | 5.233922    | 5.5654902   | 5.565721    | 5.749756    | 5.521646    |
| "Usp7"      | 6.29830765  | 6.5468424   | 6.0678799   | 6.2616399   | 6.07353835  | 6.3953072   | 6.2774164   | 6.441425    |
| "Usp8"      | 7.5048103   | 6.9456577   | 7.4047275   | 7.704786    | 7.324657    | 7.228281    | 7.383536    | 7.4842253   |
| "Usp9x"     | 5.835793071 | 6.0427792   | 5.535517371 | 5.691515943 | 5.925686543 | 5.864340029 | 5.8564595   | 6.046484586 |

|               |             |             |             |             |             |             |             |             |
|---------------|-------------|-------------|-------------|-------------|-------------|-------------|-------------|-------------|
| "Utp11"       | 7.874743    | 7.9941103   | 7.821693    | 7.6886133   | 7.4728812   | 7.59240435  | 7.94377175  | 7.6644335   |
| "Utp18"       | 8.070816    | 8.239479    | 7.2670765   | 7.4519773   | 7.8455067   | 8.246893    | 7.6134124   | 7.820656    |
| "Utp20"       | 6.423726    | 7.253642    | 6.656363    | 6.8992324   | 7.359915    | 7.5267224   | 6.838745    | 7.02082     |
| "Utp3"        | 9.434435    | 9.438356    | 9.029127    | 9.293697    | 9.28978     | 9.677982    | 9.404848    | 9.775639    |
| "Utp6"        | 5.678419033 | 6.015135667 | 6.169496167 | 5.967860967 | 5.845601267 | 6.044067667 | 6.097976567 | 5.803944133 |
| "Utrn"        | 5.2758457   | 5.26959735  | 5.46489785  | 5.3626429   | 5.31393075  | 5.2688355   | 5.2869069   | 5.4315271   |
| "Uty"         | 2.7622714   | 4.33922395  | 2.6357429   | 4.09658755  | 2.77939885  | 5.1567725   | 2.7416134   | 4.5700187   |
| "Uvrag"       | 9.306183    | 8.414241    | 7.9192038   | 8.256734    | 8.615905    | 8.339621    | 8.25921     | 8.398186    |
| "Uxs1"        | 6.5022095   | 6.55055025  | 7.44174915  | 6.88792675  | 6.3120668   | 6.746244    | 6.84919925  | 6.79440925  |
| "Uxt"         | 8.404569    | 8.85331     | 8.407694    | 8.545183    | 8.571274    | 9.028513    | 8.459144    | 8.660062    |
| "Vac14"       | 5.2091265   | 4.9875693   | 5.0181336   | 5.3552423   | 5.0980816   | 4.9434843   | 6.0772743   | 5.311275    |
| "Vamp2"       | 4.4456      | 4.9310355   | 4.0047956   | 4.1848254   | 4.5707536   | 4.385372    | 4.3729353   | 4.366645    |
| "Vamp3"       | 7.13540924  | 6.41072526  | 6.94095874  | 6.7785213   | 6.4035485   | 6.31022558  | 6.68800724  | 6.55038598  |
| "Vamp4"       | 6.910124667 | 6.3863798   | 6.487587333 | 6.492977367 | 6.324490233 | 6.533996833 | 6.369325    | 6.554747667 |
| "Vamp5"       | 5.2799225   | 5.00159445  | 5.83851315  | 5.6601207   | 5.36955     | 5.26744795  | 5.68957235  | 5.7323379   |
| "Vamp7"       | 9.2277625   | 8.96163385  | 9.0300065   | 9.1987925   | 9.0231545   | 8.6839457   | 9.52171725  | 9.3903055   |
| "Vamp8"       | 11.314029   | 11.664448   | 11.351688   | 11.402359   | 11.333796   | 11.7071085  | 11.3431     | 11.256689   |
| "Vangl1"      | 5.024171    | 5.1976533   | 5.43887     | 5.118534    | 5.0099664   | 5.03208     | 5.039274    | 5.1305137   |
| "Vangl2"      | 2.6505642   | 2.6146855   | 2.6390717   | 2.588411    | 2.6367035   | 2.6273913   | 2.639777    | 2.6224723   |
| "Vapa"        | 12.178687   | 11.9819065  | 11.329953   | 11.543189   | 11.7564405  | 12.1258355  | 11.8154655  | 11.740394   |
| "Vapb"        | 6.418482    | 6.58905975  | 6.45304965  | 6.771467    | 6.94578     | 6.74551465  | 6.954228    | 6.7323847   |
| "Vars"        | 2.0134244   | 2.7700517   | 2.375644    | 1.9538175   | 1.9989954   | 2.5596209   | 1.996609    | 2.0544615   |
| "Vasn"        | 5.6591015   | 6.20383385  | 5.80594115  | 5.402241    | 6.8480575   | 6.1287995   | 6.310616    | 6.12353025  |
| "Vasp"        | 7.658088    | 6.8622956   | 8.141107    | 7.810211    | 7.2005744   | 7.0879965   | 7.913201    | 7.4797263   |
| "Vat1"        | 3.14434935  | 2.8966228   | 3.07195795  | 2.9764687   | 3.13638035  | 2.8692068   | 3.0755325   | 3.00124145  |
| "Vav1"        | 5.261859    | 3.6959348   | 5.0927362   | 3.6989903   | 4.0092635   | 3.9695892   | 3.8619902   | 3.7010489   |
| "Vav2"        | 2.215206    | 2.167279    | 2.3191924   | 2.180419    | 2.2031188   | 2.1951668   | 2.2090862   | 2.1926744   |
| "Vav3"        | 4.48191315  | 3.849788    | 3.5599867   | 3.3922388   | 4.0527436   | 4.08457045  | 3.8297533   | 3.45058     |
| "Vax1"        | 2.552561    | 2.539447    | 2.431783    | 2.5244792   | 2.5516362   | 2.5507283   | 2.537658    | 2.5425723   |
| "Vbp1"        | 9.353546    | 8.726158    | 9.127804    | 9.087093    | 8.76791     | 8.619827    | 9.27033     | 8.671889    |
| "Vcam1"       | 9.096443433 | 7.703666967 | 8.255538667 | 7.3709893   | 7.838452833 | 8.171027333 | 6.669291067 | 6.3702734   |
| "Vcan"        | 2.3849288   | 2.357122    | 3.2456205   | 2.32264175  | 2.36867535  | 2.3629915   | 2.360481    | 2.3565727   |
| "Vcl"         | 8.52113     | 8.610273    | 8.843078    | 8.579861    | 8.326674    | 8.681316    | 8.875884    | 9.111734    |
| "Vcp"         | 8.39269165  | 8.31610485  | 8.41309975  | 8.2667815   | 8.99252385  | 8.938287    | 8.9209925   | 8.8666271   |
| "Vdac1"       | 9.0401499   | 9.3286953   | 9.2285009   | 9.38775468  | 9.38750712  | 9.01769978  | 9.28922544  | 9.5097004   |
| "Vdac2"       | 10.678965   | 11.002197   | 10.8560095  | 10.797817   | 11.023131   | 11.009795   | 10.677935   | 10.915418   |
| "Vdac3"       | 10.826546   | 11.138692   | 11.072194   | 10.992961   | 11.093106   | 11.161401   | 11.178219   | 11.032023   |
| "Vdr"         | 2.5655693   | 2.4327164   | 2.35861625  | 2.3812867   | 2.50967715  | 2.416023    | 2.4092884   | 2.415416    |
| "Vegfa"       | 7.2376963   | 6.735545    | 6.3850572   | 6.8068315   | 6.6829763   | 6.8099232   | 7.241984    | 6.984703    |
| "Vegfb"       | 5.2013855   | 4.8700843   | 4.989658    | 4.8655086   | 4.375559    | 4.4630904   | 4.895205    | 5.636218    |
| "Vegfc"       | 6.1667943   | 5.839653    | 6.088268    | 5.7218895   | 5.785815    | 6.173043    | 6.1327405   | 5.8897834   |
| "Vgli4"       | 7.4293966   | 7.3755026   | 6.956166    | 7.1482387   | 7.4085793   | 7.654392    | 6.703734    | 7.810417    |
| "Vil1"        | 2.4626336   | 2.4346764   | 2.3555462   | 2.3903284   | 2.4599798   | 2.4573045   | 2.4541135   | 2.449051    |
| "Vil1"        | 2.9481916   | 2.4769845   | 2.4208665   | 2.4494045   | 2.4941301   | 2.51139     | 2.4974468   | 2.4856381   |
| "Vim"         | 9.214771667 | 7.8025654   | 9.268021333 | 8.3910502   | 8.377127333 | 8.072680467 | 8.2372872   | 8.014517133 |
| "Vip"         | 2.5047164   | 2.4762907   | 2.4107535   | 2.464563    | 2.5024529   | 2.4969947   | 2.4905622   | 2.4939845   |
| "Vipar"       | 6.41052745  | 6.70306385  | 6.7556235   | 6.6174235   | 6.6444726   | 6.5296218   | 6.3297497   | 6.44064725  |
| "Vit"         | 2.3911839   | 2.3584068   | 2.2669926   | 2.312317    | 2.3774538   | 2.370184    | 2.3695557   | 2.3764951   |
| "Vkorc1"      | 11.906169   | 12.43988    | 12.197464   | 12.199999   | 12.509544   | 12.432434   | 12.453794   | 12.535374   |
| "Vldlr"       | 3.1908759   | 3.40171245  | 3.2647286   | 3.14612215  | 4.09452845  | 3.282763875 | 5.030314375 | 3.60677695  |
| "Vma21"       | 7.7408364   | 8.0394605   | 7.80207785  | 7.98911565  | 7.82353995  | 7.29882815  | 8.219158    | 7.9990825   |
| "Vmn1r10"     | 2.4319572   | 2.408594    | 2.3374658   | 2.3966107   | 2.4310951   | 2.436709    | 2.4030113   | 2.4181635   |
| "Vmn1r11"     | 2.9165611   | 2.9013863   | 2.7582865   | 2.8332243   | 2.948131    | 3.0655444   | 2.8865664   | 2.9489453   |
| "Vmn1r13"     | 2.73813     | 2.7095966   | 2.646377    | 2.6643438   | 2.7749953   | 2.7758956   | 2.7231631   | 2.7402701   |
| "Vmn1r14"     | 2.7287893   | 2.7049367   | 2.5926082   | 2.640439    | 2.7387779   | 2.7181082   | 2.727817    | 2.7341192   |
| "Vmn1r15"     | 2.8871396   | 2.878087    | 2.7477303   | 2.7996511   | 2.9268513   | 2.92587     | 2.8654196   | 2.9279633   |
| "Vmn1r171"    | 2.639907    | 2.6240237   | 2.5881395   | 2.5569966   | 2.6437244   | 2.6413682   | 2.616652    | 2.6379473   |
| "Vmn1r186"    | 2.8271732   | 2.817009    | 2.6707604   | 2.7191324   | 2.8487353   | 2.8616977   | 2.7918134   | 2.866818    |
| "Vmn1r25"     | 2.73109605  | 2.7077769   | 2.6029705   | 2.6701017   | 2.7410367   | 2.74204025  | 2.68176415  | 2.75498195  |
| "Vmn1r29"     | 2.6421869   | 2.6265075   | 2.5440614   | 2.587222    | 2.655183    | 2.6486225   | 2.6243927   | 2.6451108   |
| "Vmn1r40"     | 2.5043924   | 2.4762328   | 2.3928123   | 2.4260283   | 2.53076     | 2.4987586   | 2.4971392   | 2.4929545   |
| "Vmn1r41"     | 2.4563887   | 2.4283283   | 2.3497255   | 2.3845296   | 2.453393    | 2.4494207   | 2.4442065   | 2.44262     |
| "Vmn1r42"     | 2.3331776   | 2.301726    | 2.2639701   | 2.4849687   | 2.3223577   | 2.3124375   | 2.3195524   | 2.305615    |
| "Vmn1r43"     | 2.6581497   | 2.6240492   | 2.52116     | 2.6017213   | 2.6438034   | 2.6439385   | 2.6255467   | 2.645953    |
| "Vmn1r44"     | 3.3889952   | 3.3625352   | 3.2640736   | 3.3252673   | 3.391881    | 3.4004958   | 3.2649746   | 3.3996515   |
| "Vmn1r45"     | 2.641784    | 2.6284735   | 2.5509157   | 2.5706468   | 2.658702    | 2.6572413   | 2.631563    | 2.6626215   |
| "Vmn1r47"     | 2.54095755  | 2.51131405  | 2.42686245  | 2.46959985  | 2.5397215   | 2.5356272   | 2.5263039   | 2.5312874   |
| "Vmn1r50"     | 2.7709982   | 2.756069    | 2.6369712   | 2.70709     | 2.7927754   | 2.7910168   | 2.7483046   | 2.7894304   |
| "Vmn1r51"     | 2.530175    | 2.5244412   | 2.438791    | 2.488326    | 2.5474513   | 2.5411382   | 2.526059    | 2.5400126   |
| "Vmn1r58"     | 2.6899118   | 2.658771    | 2.5445795   | 2.6041896   | 3.0377486   | 2.6809113   | 2.6804085   | 2.7077737   |
| "Vmn1r65"     | 2.4333668   | 2.416887    | 2.3793588   | 2.3989854   | 2.4305751   | 2.4274411   | 2.4398687   | 2.4222808   |
| "Vmn2r-ps159" | 2.7213442   | 2.7097433   | 2.5969155   | 2.6447303   | 2.8796077   | 2.756145    | 2.7040415   | 2.7440565   |
| "Vmn2r88"     | 2.4365125   | 2.4138732   | 2.3613727   | 2.3533747   | 2.4347758   | 2.434162    | 2.4145293   | 2.431149    |
| "Vmp1"        | 9.050987    | 9.346631    | 9.208186    | 8.71201065  | 9.0912445   | 9.3981855   | 8.7954783   | 9.3299608   |
| "Vnn1"        | 9.851932    | 11.463898   | 9.9058075   | 10.403607   | 11.920996   | 12.059846   | 11.558034   | 10.82159    |
| "Vnn3"        | 10.141958   | 9.724593    | 11.752321   | 10.268113   | 10.112743   | 9.781488    | 9.983988    | 9.538191    |
| "Vopp1"       | 7.1631467   | 5.05641035  | 5.76499625  | 5.13752585  | 5.317255    | 5.0347948   | 5.6350409   | 4.9353835   |
| "Vprbp"       | 5.1510855   | 5.1276218   | 4.98328945  | 5.11615225  | 5.13878065  | 5.21028245  | 5.1273425   | 5.20954445  |
| "Vpreb1"      | 2.7490065   | 2.721551    | 2.6816866   | 2.6895578   | 2.7452471   | 2.7297182   | 2.740025    | 2.7263489   |
| "Vps11"       | 5.252472267 | 5.58916667  | 5.1334072   | 5.203861833 | 5.2420671   | 5.264626333 | 5.33695867  | 5.481959633 |
| "Vps13c"      | 2.811543    | 2.7858567   | 2.7787716   | 2.7195013   | 2.8230762   | 2.8179798   | 2.8300517   | 3.0190942   |

|           |             |             |             |             |             |             |             |             |
|-----------|-------------|-------------|-------------|-------------|-------------|-------------|-------------|-------------|
| "Vps16"   | 7.625761    | 7.4341793   | 7.380702    | 7.357935    | 7.47287     | 7.5525746   | 7.390089    | 7.5773587   |
| "Vps18"   | 2.3139539   | 2.4370115   | 2.3559408   | 2.258714    | 2.2940035   | 2.28403     | 2.303225    | 2.278758    |
| "Vps25"   | 3.8839858   | 3.9184048   | 3.5758185   | 3.789973    | 3.9161236   | 3.8474379   | 4.1639524   | 4.391469    |
| "Vps26a"  | 8.901054    | 8.966093    | 8.860718    | 9.019114    | 9.074997    | 9.173915    | 8.896032    | 8.923988    |
| "Vps26b"  | 5.7671604   | 5.925668    | 6.074837    | 5.9911185   | 5.6694875   | 6.0329497   | 5.8337818   | 6.03479     |
| "Vps28"   | 10.038826   | 10.227042   | 10.747487   | 10.414915   | 10.195269   | 9.996208    | 10.197253   | 10.445813   |
| "Vps29"   | 7.116377025 | 7.050745925 | 7.17916285  | 7.257468575 | 7.018920075 | 7.034826    | 7.2090728   | 7.178916275 |
| "Vps33b"  | 4.191753    | 3.9201186   | 4.128007    | 4.1575027   | 3.7345066   | 4.157538    | 4.2534814   | 4.169993    |
| "Vps35"   | 7.030154    | 6.748832    | 7.28625175  | 7.11574985  | 7.0881734   | 7.1236022   | 7.1350984   | 7.07089885  |
| "Vps36"   | 4.9363915   | 5.42019485  | 5.22848085  | 4.97680785  | 5.075827    | 5.20771215  | 5.2253986   | 5.09491755  |
| "Vps37a"  | 8.01230335  | 8.7865355   | 7.86091515  | 8.520107    | 8.6634215   | 8.863151    | 8.2321395   | 8.585327    |
| "Vps37b"  | 5.7905498   | 4.604219    | 4.231369    | 4.309444    | 4.3742366   | 4.7011695   | 4.238326    | 4.0269494   |
| "Vps37c"  | 8.193751    | 7.84914785  | 7.7993312   | 7.96907525  | 8.1067595   | 7.8850492   | 7.49602875  | 7.8159665   |
| "Vps39"   | 6.6393175   | 6.6092257   | 6.606576    | 6.8149867   | 6.7079563   | 6.6225977   | 6.629456    | 6.6099143   |
| "Vps41"   | 6.306069533 | 6.6708239   | 6.785260833 | 6.054040867 | 6.9899671   | 6.9133315   | 6.967692833 | 7.05935     |
| "Vps45"   | 5.2001257   | 5.4083095   | 5.184509    | 5.1492186   | 4.6516156   | 5.16956     | 5.259018    | 5.0716124   |
| "Vps4a"   | 7.291316    | 7.4036784   | 6.9697456   | 7.044939    | 7.1669884   | 7.1291513   | 6.804734    | 7.0787582   |
| "Vps4b"   | 10.412689   | 10.713448   | 10.716609   | 10.928368   | 10.868719   | 10.650545   | 11.028838   | 10.787631   |
| "Vps52"   | 2.2061293   | 2.1695106   | 2.3516078   | 2.157773    | 2.1142235   | 2.568114    | 2.2396553   | 2.1673405   |
| "Vps53"   | 4.667677033 | 4.949014033 | 4.841196367 | 4.883234867 | 4.903529933 | 4.8421254   | 4.83116     | 4.733136867 |
| "Vps54"   | 8.3171042   | 8.520319    | 8.30491925  | 8.4194075   | 8.6173575   | 8.7662045   | 8.652799    | 8.6821495   |
| "Vps72"   | 3.8974512   | 3.8406074   | 3.8333092   | 3.9432797   | 4.0754824   | 3.959508    | 4.098654    | 3.9586158   |
| "Vrk1"    | 5.969034    | 5.9377112   | 6.1879296   | 5.9343204   | 5.712437    | 5.953506    | 5.959776    | 5.9528394   |
| "Vrk2"    | 4.7027742   | 4.80035785  | 5.6814182   | 5.32711385  | 4.68917415  | 4.5633427   | 5.25474795  | 5.2160483   |
| "Vrk3"    | 7.947054    | 7.7214785   | 7.8266544   | 8.10991     | 7.7051716   | 8.279722    | 7.730755    | 8.047918    |
| "Vsig2"   | 2.7732801   | 2.7115133   | 2.7113495   | 2.724556    | 2.7567778   | 2.8145082   | 2.7358818   | 2.7426376   |
| "Vsig4"   | 13.109687   | 11.336834   | 13.150224   | 12.321835   | 12.21179    | 11.641203   | 12.430761   | 11.651164   |
| "Vsn11"   | 2.4405644   | 2.4112155   | 2.3543916   | 2.3830907   | 2.4382908   | 2.4286096   | 2.4271474   | 2.434458    |
| "Vstm2a"  | 2.6289232   | 2.5999057   | 2.4999256   | 2.56384     | 2.6253302   | 2.6250758   | 2.6181178   | 2.6267934   |
| "Vstm2b"  | 2.3854198   | 2.3472202   | 2.3237052   | 2.3377037   | 2.3704956   | 2.3622532   | 2.3707857   | 2.3574982   |
| "Vsx1"    | 2.4210916   | 2.386026    | 2.3365757   | 2.3435218   | 2.4083374   | 2.3985672   | 2.40059     | 2.4131546   |
| "Vta1"    | 7.7088437   | 8.013527    | 7.8206525   | 7.6323423   | 7.7600493   | 7.648664    | 7.594552    | 7.7904296   |
| "Vti1a"   | 4.4621305   | 4.8438228   | 4.4138715   | 4.441139    | 4.5422839   | 4.6726066   | 4.3261267   | 4.55979085  |
| "Vti1b"   | 9.205472    | 9.39992     | 9.406041    | 9.72504     | 9.175583    | 9.13535     | 9.297248    | 9.360898    |
| "Vtn"     | 12.9281605  | 12.9633735  | 12.866501   | 12.937871   | 13.1974405  | 13.3786365  | 13.0839965  | 13.2047745  |
| "Vwa1"    | 2.5426464   | 2.5047624   | 2.4735215   | 2.499555    | 2.5259433   | 2.5202549   | 2.524468    | 2.5176241   |
| "Vwa5a"   | 5.4628263   | 5.38628575  | 6.2747983   | 5.9536507   | 5.72670275  | 5.5175234   | 5.94095555  | 5.9485318   |
| "Vwf"     | 9.032547    | 4.6201835   | 4.28425     | 4.753442    | 5.167373    | 4.411561    | 4.71414     | 4.856062    |
| "Wac"     | 9.685381    | 8.976079    | 8.912558    | 9.169478    | 9.098737    | 9.792329    | 9.102162    | 9.291846    |
| "Wars"    | 2.936066333 | 2.9893811   | 3.124346233 | 3.017287767 | 2.9644477   | 2.856151833 | 2.805809633 | 2.9086225   |
| "Was"     | 5.027252    | 3.8984292   | 5.4580584   | 4.6722836   | 3.9764855   | 4.131849    | 4.372971    | 3.8854492   |
| "Wasf1"   | 4.265024    | 3.6073592   | 3.2859023   | 3.5044534   | 3.4998732   | 4.5537786   | 3.5556924   | 3.544127    |
| "Wasf2"   | 9.840474    | 9.529269    | 9.743369    | 9.620485    | 9.448613    | 9.489498    | 9.50793     | 9.347373    |
| "Wash"    | 4.01987425  | 3.8916675   | 4.05723675  | 3.9966755   | 3.90245925  | 4.18804025  | 4.015       | 4.0645263   |
| "Wasl"    | 8.0722535   | 8.127414    | 7.887414    | 8.0094815   | 7.91985725  | 8.134778625 | 7.78937335  | 7.972550325 |
| "Wbp1"    | 5.6671505   | 6.3801546   | 6.602798    | 6.8688      | 6.0671453   | 6.004015    | 6.440336    | 6.6523376   |
| "Wbp11"   | 9.043553    | 8.506342    | 8.164467    | 8.063396    | 8.430257    | 8.586596    | 8.463292    | 8.256058    |
| "Wbp2"    | 7.7132597   | 7.641573    | 7.2773786   | 7.2507815   | 7.113991    | 7.1971817   | 7.3109045   | 7.338529    |
| "Wbp4"    | 6.349264    | 6.390076    | 6.341475    | 6.27747     | 6.1723245   | 6.42578525  | 6.4094181   | 6.4795624   |
| "Wbp5"    | 10.08478    | 8.618262    | 10.170399   | 9.310631    | 9.319376    | 10.102161   | 9.63094     | 9.622468    |
| "Wbscr16" | 6.2198625   | 6.146105    | 5.9740877   | 5.643094    | 5.849515    | 6.0452495   | 6.4083433   | 6.0642157   |
| "Wbscr22" | 7.557607    | 7.7473526   | 7.435784    | 7.210231    | 7.497306    | 7.5881357   | 7.504531    | 7.225498    |
| "Wbscr25" | 2.6059854   | 2.8432393   | 2.5521815   | 2.548307    | 2.5930448   | 2.590306    | 2.592299    | 2.6694021   |
| "Wbscr27" | 5.586532    | 5.7328734   | 6.503359    | 5.967377    | 5.5589705   | 5.5602145   | 5.5512385   | 5.4932694   |
| "Wdfy1"   | 5.1090708   | 5.29983733  | 5.045179833 | 5.1909773   | 5.077267    | 4.380622867 | 4.225532667 | 5.363625133 |
| "Wdfy2"   | 6.54283     | 5.9930944   | 6.879675    | 6.4400487   | 6.3855963   | 6.2442484   | 6.387289    | 6.364951    |
| "Wdfy3"   | 8.035688    | 7.3373322   | 7.5510106   | 7.26104     | 7.3115687   | 7.1157494   | 7.8021994   | 7.3300157   |
| "Wdpcp"   | 3.8018737   | 3.7600706   | 3.7469203   | 3.7565465   | 3.7806346   | 3.7769089   | 3.7917056   | 3.7706928   |
| "Wdr1"    | 5.581041733 | 5.467146867 | 6.125810267 | 5.5289588   | 5.605762    | 5.334293233 | 5.616812067 | 5.488380133 |
| "Wdr12"   | 5.34574925  | 5.792415    | 5.7447947   | 5.5970533   | 5.84338965  | 6.06263545  | 5.6747425   | 5.8317593   |
| "Wdr13"   | 7.640323    | 7.526382    | 7.640343    | 7.5204706   | 7.554811    | 7.7441854   | 7.5032473   | 7.5938325   |
| "Wdr20a"  | 5.5539221   | 5.841935133 | 5.615865033 | 5.7569126   | 5.9065484   | 6.0152573   | 5.888105467 | 5.840778733 |
| "Wdr26"   | 7.85776866  | 7.7966399   | 7.3637783   | 7.30540114  | 7.4475664   | 7.55638166  | 7.5604265   | 7.5319649   |
| "Wdr33"   | 4.6674342   | 4.6582896   | 4.57458212  | 4.78346168  | 4.40917662  | 4.57871302  | 4.78993476  | 4.44037448  |
| "Wdr36"   | 6.6637675   | 6.75660525  | 6.3774445   | 6.383308    | 7.0434498   | 6.6470705   | 6.841033    | 6.34787655  |
| "Wdr4"    | 3.12667625  | 3.08973875  | 3.0677005   | 3.2615135   | 3.08299245  | 3.0836306   | 3.1222249   | 2.9949114   |
| "Wdr43"   | 7.42354875  | 7.29285425  | 6.245767    | 6.4498267   | 7.0661125   | 7.13071395  | 6.4149815   | 6.67974175  |
| "Wdr45"   | 7.5535087   | 7.8231972   | 7.39804555  | 7.644591    | 7.76092475  | 7.695584    | 7.48385575  | 7.795283    |
| "Wdr45l"  | 9.366949    | 9.423157    | 9.104961    | 9.157091    | 9.253443    | 8.797765    | 8.982432    | 9.545199    |
| "Wdr46"   | 5.793813    | 6.0772424   | 5.6319036   | 5.546229    | 5.823113    | 5.864265    | 5.6150994   | 5.5398507   |
| "Wdr48"   | 5.0345914   | 4.73769525  | 4.9701685   | 4.91737685  | 4.945159    | 4.904324    | 4.97211765  | 4.9317293   |
| "Wdr5"    | 4.95428285  | 4.8980093   | 4.598734    | 4.7225957   | 4.86869335  | 5.3265627   | 4.6664069   | 4.8680842   |
| "Wdr54"   | 2.6055639   | 2.5789676   | 2.5073433   | 2.553863    | 2.607467    | 2.6069942   | 2.5870998   | 2.604255    |
| "Wdr55"   | 6.2934494   | 6.1593056   | 6.3106055   | 6.2526507   | 6.2435303   | 6.4857063   | 6.2785096   | 6.426247    |
| "Wdr6"    | 7.24795685  | 7.2148025   | 7.41272825  | 7.450121    | 7.3490295   | 6.99998565  | 7.5614155   | 7.891354    |
| "Wdr61"   | 6.5518434   | 6.53372585  | 6.62350635  | 6.690228925 | 6.552453725 | 6.7254016   | 6.7233105   | 6.76130085  |
| "Wdr74"   | 7.718845    | 8.20562     | 7.6596937   | 7.501325    | 7.8031583   | 8.167705    | 7.8697543   | 7.498358    |
| "Wdr75"   | 6.01842775  | 6.0866545   | 5.42300075  | 5.33179185  | 5.65993065  | 5.7569715   | 5.56017225  | 5.59070225  |
| "Wdr77"   | 6.7661018   | 7.3299974   | 6.78269115  | 6.8140909   | 7.0883303   | 7.0065725   | 6.855469    | 6.88495435  |
| "Wdr78"   | 2.6048968   | 2.595108    | 2.509814    | 2.5350373   | 2.6576724   | 2.7066047   | 2.6780028   | 2.6243393   |
| "Wdr8"    | 4.823571    | 4.9701767   | 5.524169    | 4.9697027   | 5.3142657   | 5.4042277   | 5.9069734   | 5.780665    |

|           |             |             |             |             |             |             |             |             |
|-----------|-------------|-------------|-------------|-------------|-------------|-------------|-------------|-------------|
| "Wdr81"   | 7.9039154   | 7.22672     | 8.022841    | 8.29473     | 7.4723296   | 8.090679    | 7.8994784   | 7.482261    |
| "Wdr82"   | 9.365516    | 8.927403    | 8.417766    | 8.6783285   | 8.993579    | 9.22362     | 8.936313    | 8.897837    |
| "Wdr83"   | 5.7829585   | 6.2765555   | 6.6546445   | 6.2576904   | 6.288633    | 6.2984138   | 6.2505436   | 6.078536    |
| "Wdr85"   | 3.17083785  | 2.7963315   | 3.08921325  | 3.01850045  | 2.7555492   | 2.821646    | 3.2447623   | 2.6811371   |
| "Wdr86"   | 2.5647466   | 2.5318172   | 2.4889846   | 2.5209575   | 2.5504334   | 2.5427368   | 2.5539196   | 2.5376606   |
| "Wdr90"   | 2.5123003   | 2.4763649   | 2.412765    | 2.4548373   | 2.4981916   | 2.921115    | 2.5320487   | 2.484196    |
| "Wdsub1"  | 4.7685575   | 3.8767648   | 5.1487846   | 4.4905057   | 4.1473927   | 3.9119766   | 4.6766725   | 5.401099    |
| "Wdtc1"   | 5.665496    | 6.0895314   | 5.332335    | 5.8735156   | 5.9009943   | 6.2300634   | 5.8844953   | 5.908825    |
| "Wee1"    | 3.2288483   | 3.6703106   | 2.8129731   | 4.26136125  | 3.9229182   | 2.8976684   | 3.38402215  | 4.7971305   |
| "Wfdc1"   | 2.2752225   | 2.5512064   | 2.3053267   | 2.4683795   | 2.8934627   | 2.460558    | 2.682893    | 2.6658075   |
| "Wfdc12"  | 1.8480173   | 1.8331432   | 1.7737724   | 1.8064624   | 1.8374455   | 2.4784982   | 1.8304175   | 1.8879236   |
| "Wfdc2"   | 4.20171     | 4.4457297   | 4.5161414   | 3.121728    | 6.4386826   | 6.4949875   | 5.9413877   | 6.267448    |
| "Wfdc5"   | 2.5761383   | 2.5488017   | 2.497659    | 2.5079598   | 2.5686018   | 2.733962    | 2.5628011   | 2.5470076   |
| "Wfikkn1" | 3.276327    | 2.492032    | 2.3597312   | 2.483683    | 2.512       | 2.5103455   | 2.367844    | 2.5234997   |
| "Wfs1"    | 4.151243    | 4.674324    | 4.4040155   | 4.2009363   | 4.6567554   | 4.2391653   | 3.889056    | 4.2322254   |
| "Whsc2"   | 5.881153    | 6.5069795   | 6.3310018   | 6.263825    | 6.575823    | 6.316883    | 6.2541375   | 6.509673    |
| "Wif1"    | 2.9015837   | 2.8780022   | 2.7617748   | 2.8090515   | 2.9190736   | 2.9174476   | 2.8629935   | 2.9392533   |
| "Wipf1"   | 6.68462215  | 5.72754525  | 6.7185807   | 6.4863083   | 6.38447675  | 6.3001807   | 6.5180154   | 5.9262588   |
| "Wip1"    | 5.92988292  | 6.34579866  | 5.06687908  | 5.35047586  | 5.56819138  | 5.29337548  | 4.70353968  | 5.05252854  |
| "Wip2"    | 7.159904    | 7.44957375  | 6.90024805  | 7.053074    | 7.214574    | 7.187049    | 6.94575     | 7.22219115  |
| "Wisp1"   | 3.5819741   | 3.15051065  | 3.9134584   | 3.2171947   | 3.15693165  | 3.2634236   | 3.7288778   | 3.2474425   |
| "Wisp2"   | 2.255739    | 2.2289238   | 7.281181    | 5.952035    | 2.238031    | 2.238585    | 2.251596    | 2.2330503   |
| "Wiz"     | 2.263615    | 2.2813785   | 2.1876915   | 2.346314    | 2.2274477   | 2.2390633   | 2.2323022   | 2.239964    |
| "Wls"     | 4.836775867 | 4.176272033 | 5.083707133 | 4.7276988   | 4.8026982   | 4.571915    | 5.244172133 | 4.7855709   |
| "Wnk1"    | 10.272437   | 9.67473725  | 10.0040625  | 10.017944   | 9.67889875  | 10.0790965  | 10.03674125 | 9.653135    |
| "Wnk2"    | 2.7922398   | 2.7681497   | 2.65381195  | 2.7206878   | 2.80697675  | 2.8119272   | 2.7673519   | 2.8150421   |
| "Wnk4"    | 2.370483    | 2.3448954   | 2.2990294   | 2.3313756   | 2.3751547   | 2.4550884   | 2.354454    | 3.0043378   |
| "Wnt11"   | 2.5155618   | 2.501618    | 2.433869    | 2.6391258   | 2.5129094   | 2.505949    | 2.515253    | 2.503135    |
| "Wnt2"    | 4.4296427   | 4.369296    | 2.8026645   | 4.3685904   | 5.29588     | 4.042631    | 4.485947    | 4.592327    |
| "Wnt3"    | 3.22284     | 3.2272735   | 2.9934933   | 3.1294293   | 3.3368793   | 3.439418    | 3.1689363   | 3.3619523   |
| "Wnt4"    | 2.1654277   | 2.4911442   | 2.1963086   | 2.122851    | 2.2652225   | 2.202484    | 2.067675    | 2.1355057   |
| "Wnt5a"   | 2.8490741   | 2.8286686   | 2.7235371   | 2.7938567   | 2.9050163   | 2.8991852   | 2.8337431   | 2.867435    |
| "Wnt5b"   | 5.674434    | 6.06094165  | 5.9056611   | 5.66437985  | 6.0394716   | 6.7363842   | 5.87390215  | 5.4098792   |
| "Wnt6"    | 2.61091     | 2.9918675   | 2.5045059   | 2.562206    | 2.773089    | 2.69734     | 2.5998244   | 2.5960956   |
| "Wnt8a"   | 2.9696999   | 2.94378     | 2.6060643   | 2.8963068   | 2.970687    | 2.9718266   | 2.9682019   | 2.9480224   |
| "Wnt8b"   | 2.315143    | 2.2857685   | 2.2481568   | 2.2660284   | 2.3721833   | 2.300497    | 2.3018517   | 2.2967153   |
| "Wrap53"  | 3.0068893   | 2.9363558   | 2.8342638   | 3.3158255   | 3.0091984   | 3.0882888   | 3.2499118   | 2.990204    |
| "Wrn"     | 3.347172    | 3.008009    | 3.56225465  | 3.36128885  | 3.2061255   | 3.1883955   | 3.61305275  | 3.5526075   |
| "Wrnip1"  | 6.62070075  | 6.0167852   | 6.0395468   | 6.0392557   | 5.9352976   | 6.4637488   | 6.26031915  | 5.99245755  |
| "Wsb1"    | 11.33757    | 8.115922    | 8.497722    | 8.023349    | 7.7492037   | 9.716005    | 8.363961    | 8.604231    |
| "Wsb2"    | 8.6678695   | 8.004987    | 7.34325175  | 7.65321685  | 7.8616383   | 8.0194998   | 7.5288282   | 7.703933    |
| "Wt1"     | 2.911156    | 2.872017    | 2.8616357   | 2.8441787   | 2.9170878   | 2.8861516   | 2.8832183   | 2.9101677   |
| "Wtap"    | 8.896058    | 8.860946    | 8.789296    | 8.7137365   | 8.5293987   | 8.6591035   | 8.518814    | 8.3617295   |
| "Wwc1"    | 4.730498625 | 5.0686088   | 5.4038951   | 5.4283976   | 5.332884325 | 5.3033904   | 5.53446495  | 5.7249767   |
| "Wwc2"    | 5.76923835  | 5.748427575 | 5.66022465  | 5.68339805  | 5.81636695  | 5.5941284   | 5.82549315  | 5.743824    |
| "Wwox"    | 2.2655472   | 2.281973667 | 2.20837     | 2.458680833 | 2.305251767 | 2.231141933 | 2.412944067 | 2.636086933 |
| "Wwp1"    | 7.9209195   | 8.333026767 | 7.9855324   | 8.384859067 | 8.2648021   | 8.1210099   | 8.5849615   | 8.665692333 |
| "Wwp2"    | 4.100456    | 4.45070385  | 4.5092425   | 4.32253195  | 4.17217815  | 4.2519357   | 4.2387678   | 4.20709145  |
| "Wwtr1"   | 6.199098533 | 6.088823467 | 6.109901133 | 6.549509267 | 6.6708065   | 6.024120533 | 6.342729567 | 6.396066767 |
| "X99384"  | 7.067467    | 6.9242616   | 6.828286    | 6.565803    | 6.8265862   | 7.0998      | 6.732968    | 6.651213    |
| "Xab2"    | 5.9151752   | 5.8925558   | 5.7238291   | 5.996574233 | 5.8949611   | 5.791807433 | 5.579891233 | 5.7611099   |
| "Xbp1"    | 9.83072     | 9.699100675 | 9.86199285  | 9.60735265  | 9.84683025  | 9.59084265  | 9.5458988   | 10.09356    |
| "Xcl1"    | 2.9692018   | 2.9713354   | 2.9699697   | 2.9678993   | 3.0143406   | 2.955471    | 2.962955    | 3.0114388   |
| "Xdh"     | 10.040557   | 9.674541    | 10.63689    | 10.523715   | 10.002105   | 9.989146    | 10.014213   | 10.256335   |
| "Xiap"    | 5.089477017 | 5.0360568   | 5.035326433 | 5.15345565  | 5.20123635  | 5.243739983 | 5.210082683 | 5.360032417 |
| "Xist"    | 10.19235577 | 2.311913233 | 11.07517917 | 2.275023    | 11.31376067 | 2.272489333 | 11.361226   | 2.298213533 |
| "Xlr3a"   | 4.9117227   | 4.864469    | 2.9771943   | 6.1122284   | 3.6596184   | 5.4431686   | 5.2903676   | 7.3891463   |
| "Xlr4a"   | 5.4696503   | 2.1300852   | 4.181581    | 6.1595635   | 2.8531332   | 2.7433796   | 3.150319    | 6.5194273   |
| "Xlr5a"   | 2.9534736   | 2.944446    | 2.8927877   | 2.8547158   | 2.9925785   | 2.9836235   | 2.9073691   | 2.9560578   |
| "Xpa"     | 4.693702933 | 4.812985633 | 4.258288933 | 4.447851767 | 4.5301403   | 4.568907867 | 4.353617467 | 4.370425033 |
| "Xpc"     | 7.125885    | 6.8049316   | 6.840194    | 7.0498624   | 6.835352    | 6.9791937   | 6.872174    | 6.64081     |
| "Xpnpep1" | 7.5574417   | 8.029418    | 7.581779    | 7.596253    | 7.767703    | 7.5265646   | 7.3513036   | 7.4551177   |
| "Xpo1"    | 7.6486437   | 7.68364775  | 8.6130015   | 8.3381435   | 7.834111    | 7.68534075  | 7.9545485   | 8.0923985   |
| "Xpo4"    | 3.2877886   | 3.0468116   | 2.735211    | 2.6908371   | 2.7367637   | 2.7738311   | 2.717811    | 2.778985    |
| "Xpo5"    | 3.8778937   | 4.2540126   | 4.266345    | 4.0888968   | 4.1864023   | 3.895471    | 4.17981     | 4.1100535   |
| "Xpo6"    | 6.863108    | 6.860468    | 7.341413    | 7.1225605   | 6.9806566   | 6.6226335   | 7.071771    | 7.0575724   |
| "Xpo7"    | 7.944963    | 8.51455685  | 8.417597    | 8.4200685   | 8.5963835   | 8.456168    | 8.4821182   | 8.5775255   |
| "Xpot"    | 8.9926195   | 10.38073    | 8.998904    | 9.531799    | 10.885352   | 10.081008   | 9.567658    | 9.729283    |
| "Xpr1"    | 4.67989725  | 4.510985175 | 4.379486025 | 4.507140525 | 4.615729025 | 4.6145627   | 4.46914855  | 4.482314    |
| "Xrcc1"   | 5.4183416   | 5.5696583   | 5.532646    | 5.778556    | 5.3849134   | 6.192964    | 5.593107    | 5.745234    |
| "Xrcc2"   | 2.907858    | 2.8788567   | 2.7381296   | 2.8411698   | 2.8977168   | 2.895925    | 2.8941972   | 2.895399    |
| "Xrcc4"   | 5.478195    | 6.06291195  | 6.1646304   | 5.80090785  | 5.90632065  | 5.95226145  | 6.388131    | 6.07210085  |
| "Xrcc5"   | 5.524284    | 5.8338666   | 6.6487308   | 6.260882    | 6.3168063   | 5.6112514   | 6.6330824   | 6.8816037   |
| "Xrcc6"   | 5.4837613   | 5.7309756   | 6.6812162   | 6.502489    | 6.162642    | 6.277791    | 6.3638787   | 6.4068966   |
| "Xrn1"    | 4.419591    | 4.529297    | 4.4020476   | 4.363674    | 3.7520938   | 4.398106    | 4.4147105   | 4.54357     |
| "Xrn2"    | 6.826887267 | 6.8795502   | 6.424839933 | 6.501215067 | 6.6804394   | 6.689113433 | 6.499963667 | 6.422488433 |
| "Xylb"    | 9.121048    | 9.336559    | 9.824996    | 9.954792    | 10.049122   | 10.090374   | 9.85779     | 10.252937   |
| "Xylt2"   | 2.5499496   | 2.4752054   | 2.7517498   | 2.4970946   | 2.5004585   | 2.5328927   | 3.0261045   | 2.5199974   |
| "Yaf2"    | 8.674285    | 9.1616255   | 7.8538505   | 8.746796    | 8.6169245   | 8.336041    | 8.625443    | 8.8679075   |
| "Yap1"    | 6.52269035  | 6.956141    | 6.55651285  | 6.5864542   | 6.7197415   | 6.827784    | 6.6538563   | 6.5941338   |
| "Yars"    | 4.036785    | 4.003616    | 3.9640462   | 3.8776498   | 4.018413    | 4.783106    | 3.9674306   | 4.2406397   |

|           |             |             |             |             |             |             |             |             |
|-----------|-------------|-------------|-------------|-------------|-------------|-------------|-------------|-------------|
| "Ybx1"    | 8.082842    | 8.08180315  | 8.0244905   | 7.9469583   | 8.08412365  | 8.0079525   | 8.07687775  | 8.144496    |
| "Yeats4"  | 8.877424    | 9.060558    | 8.881576    | 8.7664      | 8.431477    | 8.9488945   | 8.735123    | 8.832369    |
| "Yes1"    | 6.11090415  | 5.9582989   | 5.47723875  | 6.0922446   | 5.966016    | 6.227192    | 6.334335    | 6.24275185  |
| "Yif1a"   | 6.982688767 | 7.6126229   | 7.35276     | 7.375596767 | 7.501748167 | 7.352457133 | 7.397543067 | 7.410163767 |
| "Yipf1"   | 8.409833    | 8.963309    | 9.272032    | 9.300753    | 8.81011     | 8.857267    | 8.913659    | 9.032132    |
| "Yipf2"   | 6.78204385  | 6.9371      | 7.13351725  | 7.11926365  | 7.0998925   | 6.96070075  | 6.9048532   | 7.014977    |
| "Yipf3"   | 8.806478    | 8.6614275   | 8.491298    | 8.490536    | 8.627326    | 8.679854    | 8.347127    | 8.515494    |
| "Yipf4"   | 7.366897567 | 7.129562    | 6.5514471   | 6.762448767 | 6.742745033 | 7.0779338   | 7.129426    | 7.0537959   |
| "Yipf5"   | 8.99731325  | 9.184218    | 9.2977435   | 8.930923    | 9.3241305   | 8.8682      | 8.9264805   | 8.934276    |
| "Ykt6"    | 6.13272435  | 6.82433065  | 6.27434375  | 6.194202    | 6.3100465   | 6.31429965  | 6.2596929   | 6.23151085  |
| "Ylpm1"   | 6.5804753   | 7.0673475   | 6.6504335   | 6.821041    | 6.8547697   | 6.868815    | 6.83221     | 6.714363    |
| "Yme1l1"  | 8.000344333 | 7.877421333 | 7.922544433 | 8.034696767 | 7.9316016   | 7.958572333 | 8.283300333 | 8.1637143   |
| "Ypel1"   | 2.5557528   | 2.5335686   | 2.4653747   | 2.477275    | 2.556067    | 2.5671318   | 2.5379357   | 2.5491571   |
| "Ypel3"   | 7.900708    | 7.879526    | 7.3684688   | 8.131618    | 7.878859    | 7.970252    | 7.827359    | 8.280949    |
| "Ypel5"   | 9.1533545   | 9.141536    | 8.26172925  | 8.923659    | 8.7712355   | 8.6028905   | 8.422628    | 8.6469815   |
| "Yrdc"    | 8.683186    | 7.527293    | 6.8635406   | 7.006906    | 7.5593934   | 7.499047    | 6.6187167   | 7.493745    |
| "Ythdc1"  | 9.7168735   | 9.018532    | 8.953923    | 8.802864    | 9.1039435   | 9.303952    | 9.116187    | 8.9790943   |
| "Ythdf1"  | 8.582993667 | 8.1457356   | 7.974552767 | 8.019205667 | 8.319116333 | 8.132721333 | 8.003532567 | 8.441091667 |
| "Ythdf2"  | 8.7083245   | 8.150365    | 8.0347327   | 7.78667115  | 8.2804785   | 8.0342428   | 7.97126775  | 7.7865545   |
| "Ythdf3"  | 8.650043667 | 8.678673    | 8.382263    | 8.5245605   | 8.771323    | 8.832074167 | 8.739743167 | 8.826227    |
| "Ywhab"   | 8.973462333 | 8.802470367 | 9.464353617 | 9.109183667 | 8.909768367 | 8.690421333 | 9.11795925  | 8.9797007   |
| "Ywhae"   | 9.3835245   | 9.528455    | 9.40086225  | 9.35493025  | 9.505081    | 9.38182325  | 9.747818    | 9.63293125  |
| "Ywhag"   | 8.2602867   | 8.5874265   | 8.4299678   | 8.547961    | 8.6809785   | 8.632474    | 8.7336098   | 8.6739553   |
| "Ywhah"   | 9.48825     | 8.86062     | 9.4168625   | 9.339626    | 9.080546    | 9.145455    | 9.040392    | 8.990562    |
| "Ywhaq"   | 10.32185443 | 10.11322029 | 10.4919815  | 10.43144571 | 10.05565157 | 10.69072729 | 10.78540857 | 10.37119857 |
| "Ywhaz"   | 9.07053406  | 8.6650392   | 8.9005354   | 8.69075624  | 8.55672338  | 8.64548594  | 8.77729586  | 8.5960862   |
| "Yy1"     | 9.056775333 | 8.429466333 | 8.0274349   | 8.219807533 | 8.30232     | 8.4871975   | 8.268627333 | 8.577399667 |
| "Zadh2"   | 8.988537    | 9.987716    | 9.79096     | 10.118129   | 10.410414   | 9.851693    | 10.266678   | 10.556107   |
| "Zap70"   | 6.7088578   | 7.2251236   | 6.76411365  | 7.1714325   | 7.27034015  | 7.42543635  | 7.2069427   | 6.7346      |
| "Zbed3"   | 2.915479175 | 2.9054916   | 2.931562975 | 2.858839925 | 2.90728275  | 2.9023081   | 2.8914405   | 2.89833745  |
| "Zbed6"   | 8.35236475  | 8.1750058   | 8.60081795  | 8.5445163   | 8.67145975  | 8.711561    | 8.7461185   | 9.053205325 |
| "Zbp1"    | 5.2569518   | 4.72599915  | 8.61431885  | 6.949901    | 4.1166828   | 4.0774327   | 5.78364215  | 4.9959542   |
| "Zbtb1"   | 6.405529    | 6.352842    | 6.417789    | 6.4331074   | 6.4980183   | 6.3715453   | 6.895201    | 6.8219376   |
| "Zbtb12"  | 2.3957803   | 2.3549502   | 2.327696    | 3.260113    | 2.380492    | 2.3729556   | 2.3831427   | 2.376125    |
| "Zbtb16"  | 6.741092    | 6.62003175  | 5.60916825  | 4.8849318   | 5.37810805  | 6.2248563   | 6.00226165  | 4.05423665  |
| "Zbtb17"  | 5.4603114   | 5.1033163   | 4.7897816   | 5.0564423   | 5.080561    | 5.32785     | 5.1300106   | 5.495578    |
| "Zbtb2"   | 7.2366724   | 5.4358377   | 5.4886637   | 5.4343824   | 5.5217886   | 5.8914156   | 5.515915    | 6.0061135   |
| "Zbtb20"  | 8.566105667 | 8.720760333 | 8.1013699   | 8.918185667 | 8.591064    | 8.702965333 | 8.442696    | 9.203621    |
| "Zbtb22"  | 7.5332885   | 7.217192    | 6.989455    | 6.8901443   | 6.901179    | 7.137909    | 7.120005    | 6.7254057   |
| "Zbtb25"  | 2.94082     | 3.4724252   | 3.247547    | 2.8839602   | 2.8318174   | 2.91508     | 2.9016864   | 2.91972     |
| "Zbtb33"  | 2.8021588   | 2.7701929   | 2.7189543   | 2.704799    | 2.7846484   | 2.7829926   | 2.7670548   | 2.815072    |
| "Zbtb37"  | 2.8526282   | 2.8490052   | 2.809629    | 2.833371    | 2.8686395   | 2.8661222   | 2.8760576   | 2.8606882   |
| "Zbtb44"  | 5.10241     | 5.3170515   | 4.94255825  | 5.0570054   | 5.15234385  | 4.91385185  | 5.2109629   | 5.34483635  |
| "Zbtb46"  | 5.3828211   | 4.2451085   | 4.2890573   | 4.321743    | 4.34352355  | 4.3159616   | 4.64166925  | 4.4360428   |
| "Zbtb48"  | 4.8507047   | 5.605011    | 5.470145    | 5.838344    | 5.523111    | 5.207418    | 5.5191827   | 5.6907225   |
| "Zbtb7a"  | 6.365457    | 6.595821    | 6.0526214   | 5.837655    | 6.8036523   | 6.586151    | 6.8034563   | 6.456067    |
| "Zbtb7b"  | 3.96451325  | 4.2200387   | 4.16668605  | 4.1311401   | 4.1503769   | 4.13698805  | 4.1449865   | 4.14504585  |
| "Zbtb8a"  | 3.0507078   | 3.0578291   | 2.942334    | 2.9871182   | 3.3403008   | 2.8247747   | 3.0416517   | 3.0864797   |
| "Zc3h10"  | 5.484581    | 5.449908    | 5.031091    | 5.2335787   | 5.4731097   | 5.8079224   | 5.6007147   | 5.4615893   |
| "Zc3h12a" | 3.782684    | 2.807139    | 5.252705    | 2.9167674   | 2.826513    | 3.0050106   | 2.9398234   | 3.004571    |
| "Zc3h12c" | 5.895231    | 6.280445    | 5.9312525   | 6.289759    | 6.330237    | 6.721481    | 6.6130867   | 6.798224    |
| "Zc3h14"  | 8.268592    | 8.635209    | 8.001995    | 8.0809285   | 8.4573385   | 8.7074705   | 8.27313315  | 8.38057725  |
| "Zc3h15"  | 9.5277655   | 8.97327325  | 8.9081485   | 8.8975075   | 8.6676405   | 9.159997    | 8.7830655   | 8.9302275   |
| "Zc3h18"  | 7.6098237   | 7.4460073   | 7.359523    | 7.249341    | 7.6916776   | 7.7051015   | 7.364886    | 7.4978113   |
| "Zc3h3"   | 4.172848    | 4.48459     | 3.4236057   | 3.9369211   | 4.304995    | 3.9997327   | 3.98736     | 4.046476    |
| "Zc3h7a"  | 4.83489885  | 4.4387753   | 4.5163263   | 4.3480544   | 4.7551037   | 4.2128751   | 4.16881465  | 4.4179495   |
| "Zc3h8"   | 5.4646072   | 6.298314    | 5.3170166   | 6.000745    | 6.8184195   | 6.711391    | 5.795471    | 6.8828707   |
| "Zc3hc1"  | 6.217561    | 5.801388    | 5.9688597   | 5.846795    | 6.0706134   | 5.776892    | 5.660798    | 5.882203    |
| "Zcchc10" | 4.602588    | 4.2301855   | 4.4868755   | 3.6771696   | 4.2919207   | 4.3486776   | 5.33245     | 4.556627    |
| "Zcchc14" | 5.527895567 | 5.558983    | 5.0393152   | 5.802704733 | 5.4596358   | 5.502131767 | 5.4705969   | 5.829970533 |
| "Zcchc17" | 6.1241393   | 6.5045357   | 6.761386    | 6.679262    | 6.260127    | 6.263419    | 6.424404    | 6.319521    |
| "Zcchc18" | 2.45401     | 2.4370825   | 2.3963895   | 2.400685    | 2.4288156   | 2.5771544   | 2.4214618   | 2.4233472   |
| "Zcchc3"  | 2.5978075   | 2.5744499   | 2.54001095  | 2.54271865  | 2.58750905  | 2.5837694   | 2.5931177   | 2.5788416   |
| "Zcchc6"  | 7.6927137   | 7.61473     | 8.0896685   | 8.0512195   | 7.54793     | 7.306209    | 7.645914    | 7.68637535  |
| "Zcchc7"  | 8.037937    | 7.901978    | 7.755835    | 7.865615    | 8.092684    | 8.321498    | 8.10359     | 8.056572    |
| "Zcchc8"  | 7.3159237   | 7.102498    | 7.275387    | 7.465918    | 7.2629166   | 7.5348296   | 7.155948    | 7.590574    |
| "Zcchc9"  | 7.0332365   | 6.6320934   | 6.6312976   | 6.5426736   | 6.7182827   | 6.9452353   | 6.7463737   | 6.7126684   |
| "Zdhhc12" | 5.2323246   | 5.312015    | 5.1923394   | 5.1925125   | 4.9737544   | 5.2410297   | 5.2202044   | 5.151828    |
| "Zdhhc14" | 7.79484686  | 6.18948328  | 6.6708122   | 6.47270574  | 6.56752314  | 6.68400442  | 6.49431778  | 6.45997494  |
| "Zdhhc16" | 6.1993766   | 6.7306437   | 6.423628    | 6.562108    | 6.5212235   | 6.905993    | 6.4506474   | 6.4524913   |
| "Zdhhc2"  | 2.846929933 | 2.7663938   | 2.884724333 | 2.728692333 | 2.8635146   | 2.849132067 | 2.882134733 | 2.905331067 |
| "Zdhhc20" | 7.1870956   | 6.5708065   | 6.250139    | 6.053706    | 6.0968766   | 6.5531163   | 7.023885    | 6.8137994   |
| "Zdhhc3"  | 4.93823025  | 5.3459545   | 5.3574637   | 5.2198675   | 5.0062882   | 4.6224744   | 5.1149186   | 4.9280033   |
| "Zdhhc4"  | 6.1536016   | 6.7665267   | 6.142064    | 6.426839    | 6.576125    | 5.7341375   | 6.23528     | 6.38881     |
| "Zdhhc5"  | 5.3998953   | 5.48752035  | 5.32770915  | 5.3323114   | 5.3697014   | 5.45555985  | 5.535288    | 5.5358219   |
| "Zdhhc6"  | 7.60768975  | 7.89705035  | 7.75775725  | 7.8981      | 7.8884583   | 8.18834315  | 7.8557355   | 7.943834    |
| "Zdhhc7"  | 6.1766577   | 5.726169    | 5.744007    | 5.758655    | 5.7457266   | 5.718884    | 5.4089828   | 5.731352    |
| "Zdhhc8"  | 3.9463286   | 3.8805573   | 3.8521874   | 3.8718715   | 3.9095783   | 3.8951607   | 3.9047544   | 3.8944545   |
| "Zdhhc9"  | 9.415576    | 9.7395115   | 9.841107    | 10.032362   | 10.006294   | 9.391408    | 9.945979    | 9.953874    |
| "Zeb1"    | 7.0952287   | 7.5094614   | 7.6120615   | 7.813145    | 7.298525    | 7.397655    | 7.816219    | 7.7585344   |
| "Zeb2"    | 8.483196    | 7.6532373   | 9.285859    | 9.004445    | 8.2550335   | 8.56067     | 8.905916    | 8.585788    |

|           |             |             |             |             |             |             |             |             |
|-----------|-------------|-------------|-------------|-------------|-------------|-------------|-------------|-------------|
| "Zfa"     | 3.6453655   | 3.22483325  | 2.94204935  | 2.94047035  | 3.1600305   | 3.119802    | 3.0459192   | 3.03563025  |
| "Zfand1"  | 7.4463897   | 7.9164534   | 7.3762803   | 7.9258914   | 7.936327    | 7.657474    | 7.876087    | 7.496655    |
| "Zfand2a" | 6.114772875 | 5.451941925 | 5.262236575 | 5.326146    | 5.4518946   | 5.3874998   | 5.080820475 | 4.8998813   |
| "Zfand2b" | 7.81667885  | 7.9174085   | 7.0869138   | 7.47882245  | 7.11815315  | 7.66967465  | 7.06320225  | 7.3888247   |
| "Zfand3"  | 5.761902    | 5.86302892  | 5.68404052  | 5.86791698  | 5.66175554  | 5.89190374  | 5.80158546  | 5.95354078  |
| "Zfand5"  | 11.033579   | 9.55856333  | 9.329834767 | 9.403827533 | 9.351637367 | 9.743652467 | 9.416634333 | 9.347631467 |
| "Zfand6"  | 11.1171045  | 11.1471135  | 10.1641605  | 10.533726   | 10.9102265  | 11.187847   | 10.5962195  | 10.9373005  |
| "Zfhx3"   | 6.334106633 | 5.953966033 | 6.174629    | 6.2204119   | 6.124701533 | 6.323924333 | 6.475594733 | 6.864456667 |
| "Zfhx4"   | 2.9286475   | 3.2815325   | 3.288454    | 3.2521772   | 3.6185164   | 3.1484926   | 3.94333     | 3.1292043   |
| "Zfml"    | 6.75300145  | 7.28371985  | 7.39737815  | 7.3534953   | 7.5291605   | 7.6423712   | 7.718559    | 7.46817165  |
| "Zfp1"    | 5.740261    | 5.3872294   | 4.9621334   | 5.0205398   | 4.466125    | 4.8962665   | 5.1630883   | 5.399187    |
| "Zfp101"  | 3.37455485  | 3.91682885  | 4.0569382   | 4.1959506   | 4.0845852   | 4.31144725  | 4.8490465   | 4.40864875  |
| "Zfp105"  | 2.8546004   | 2.9094625   | 2.880594    | 2.99656     | 2.9291253   | 2.9196656   | 2.9364607   | 2.9164236   |
| "Zfp106"  | 5.10245254  | 5.1917129   | 4.71910362  | 4.72658436  | 5.03307512  | 5.1518707   | 4.87423982  | 4.94132988  |
| "Zfp108"  | 2.8695297   | 2.8509626   | 2.7152975   | 2.807311    | 2.8831244   | 2.8808231   | 2.8770466   | 2.8880868   |
| "Zfp110"  | 8.632227167 | 8.507739    | 7.708051333 | 7.798197433 | 8.2186956   | 8.408458667 | 8.278366233 | 8.293326467 |
| "Zfp111"  | 3.3103552   | 3.1343102   | 3.1661842   | 2.9730961   | 3.1922748   | 3.1428182   | 2.9934578   | 3.1386523   |
| "Zfp112"  | 2.736063    | 2.6978068   | 2.602538    | 2.6534934   | 2.7682045   | 2.7105565   | 2.98525     | 2.7041426   |
| "Zfp113"  | 2.8326862   | 3.1283176   | 3.558641    | 2.872604    | 3.2284927   | 2.8888671   | 2.7794185   | 2.8592956   |
| "Zfp119a" | 4.0557227   | 4.154505    | 3.8364778   | 3.9436443   | 4.2201924   | 4.0307317   | 4.0699697   | 4.1055875   |
| "Zfp120"  | 4.7920675   | 4.5752225   | 4.1890774   | 5.0012197   | 4.886119    | 4.7288814   | 5.4962826   | 5.241487    |
| "Zfp125"  | 3.1156187   | 3.0886917   | 3.050841    | 3.0784178   | 3.1076279   | 3.1090016   | 3.105772    | 3.1382542   |
| "Zfp131"  | 7.2697554   | 7.004468    | 6.40642     | 6.9535766   | 7.4739413   | 7.6128416   | 6.804677    | 7.098522    |
| "Zfp14"   | 2.569169    | 2.573347    | 2.411987    | 2.5458937   | 2.569549    | 2.7804847   | 2.5262673   | 2.5627346   |
| "Zfp142"  | 2.5768731   | 2.54086195  | 2.4834432   | 2.5230845   | 2.60958275  | 2.55716085  | 2.5475656   | 2.55117285  |
| "Zfp143"  | 4.5429235   | 4.42888705  | 4.4668205   | 4.548198    | 4.3052062   | 4.7346838   | 4.9958433   | 4.8229151   |
| "Zfp146"  | 2.521911    | 2.4901335   | 2.5831997   | 2.4459848   | 2.5575948   | 2.4974086   | 2.506426    | 2.6017656   |
| "Zfp148"  | 6.802472775 | 6.7408542   | 6.7765795   | 6.97945785  | 7.164170525 | 7.08907265  | 7.2395649   | 7.225118975 |
| "Zfp160"  | 5.249321    | 6.24636     | 5.7997303   | 6.171325    | 6.7339773   | 6.1174393   | 6.5851994   | 6.4269347   |
| "Zfp161"  | 5.277401925 | 5.337197    | 5.167951325 | 5.370552325 | 5.2821495   | 5.2489712   | 5.3724618   | 5.25946245  |
| "Zfp187"  | 9.408296    | 9.480154    | 9.637555    | 9.853091    | 9.748387    | 9.781536    | 9.54967     | 9.69765     |
| "Zfp189"  | 3.6783514   | 4.1894054   | 4.1121993   | 3.3744495   | 4.3319345   | 3.9774451   | 3.9905396   | 3.7745066   |
| "Zfp191"  | 5.21513655  | 5.26998285  | 5.136887775 | 5.3197567   | 5.455531375 | 5.6191573   | 5.35979815  | 5.421496475 |
| "Zfp2"    | 3.1902254   | 3.2199922   | 3.03282585  | 3.0921447   | 3.13723305  | 3.2497484   | 3.190789    | 3.3302687   |
| "Zfp202"  | 2.3469822   | 2.2048519   | 2.6823251   | 2.1875033   | 2.2271705   | 2.2257323   | 2.3123212   | 2.21031     |
| "Zfp207"  | 5.214835725 | 5.84663465  | 5.7415185   | 5.8241252   | 6.248755725 | 6.26103425  | 6.124979875 | 6.06351715  |
| "Zfp212"  | 4.854712    | 4.771591    | 4.8221145   | 4.7143736   | 4.792288    | 4.741815    | 4.772549    | 4.7753987   |
| "Zfp213"  | 2.4930007   | 2.8536348   | 2.627337    | 2.4147415   | 2.4811838   | 2.5988617   | 2.4846585   | 2.4281244   |
| "Zfp219"  | 5.157079    | 5.1337485   | 5.103015    | 5.132521    | 5.3577952   | 5.4870625   | 4.8974795   | 5.3650746   |
| "Zfp235"  | 2.7920742   | 2.7708578   | 2.703174    | 2.7574012   | 2.817495    | 2.809012    | 2.7978563   | 2.7921486   |
| "Zfp238"  | 8.402582    | 8.66292     | 8.607721    | 8.4901495   | 8.701372    | 8.907566    | 9.125581    | 9.160831    |
| "Zfp239"  | 2.5220942   | 2.4885883   | 2.6333175   | 2.460349    | 2.566562    | 2.505113    | 2.5166485   | 2.4925027   |
| "Zfp259"  | 7.92534985  | 6.9164315   | 6.0717477   | 6.90675775  | 8.1399155   | 7.19312015  | 6.319856    | 7.9949835   |
| "Zfp26"   | 3.1129622   | 4.754323    | 4.903572    | 5.0989537   | 4.862878    | 4.959713    | 5.002899    | 4.744512    |
| "Zfp260"  | 5.429959825 | 5.6267178   | 5.920589575 | 5.998527275 | 6.0580501   | 5.9579158   | 6.254793625 | 6.193071025 |
| "Zfp275"  | 6.8620343   | 6.871276    | 7.2482953   | 7.113089    | 6.6120834   | 6.9710593   | 6.410094    | 6.90332     |
| "Zfp276"  | 3.30317795  | 5.2465623   | 3.9775642   | 4.39126835  | 5.1125082   | 4.56037515  | 4.5943907   | 4.0663153   |
| "Zfp277"  | 8.370933    | 8.426552    | 8.37427     | 8.36016     | 8.214421    | 8.500225    | 8.196088    | 8.502653    |
| "Zfp28"   | 2.4086542   | 2.3812785   | 2.337133    | 2.357419    | 2.4047194   | 2.4032586   | 2.3981984   | 2.393128    |
| "Zfp280c" | 6.6558275   | 6.0621743   | 5.9992847   | 6.0485306   | 6.1625223   | 6.4712462   | 6.429308    | 6.4317045   |
| "Zfp280d" | 6.00497865  | 6.2225422   | 5.635514    | 6.0413257   | 6.3169748   | 6.39660465  | 6.13429465  | 5.88064485  |
| "Zfp281"  | 8.19924465  | 8.4167945   | 8.0632235   | 8.23677885  | 7.94507385  | 8.65308575  | 8.128125    | 8.41577     |
| "Zfp282"  | 2.81433655  | 2.7950566   | 2.67906705  | 2.8395006   | 2.8295897   | 2.8424073   | 3.1763982   | 2.92053795  |
| "Zfp292"  | 7.04100875  | 7.53419325  | 6.669605475 | 7.059099    | 6.923156925 | 7.479068875 | 6.606417725 | 6.326689575 |
| "Zfp295"  | 8.394326    | 6.0465026   | 5.758149    | 5.7864676   | 5.9128165   | 5.9317346   | 5.2787895   | 5.8092065   |
| "Zfp30"   | 2.6202004   | 2.597238    | 2.6038063   | 2.5749967   | 2.6444967   | 2.6446726   | 2.6255155   | 2.603115    |
| "Zfp318"  | 4.86034095  | 5.275289325 | 4.56799915  | 5.1822254   | 5.143808875 | 5.426284525 | 5.205539    | 4.978315925 |
| "Zfp319"  | 2.9179184   | 2.9028952   | 2.864597    | 2.8178089   | 2.913902    | 2.941757    | 2.879339    | 3.0752819   |
| "Zfp322a" | 4.1192517   | 5.308497    | 5.995647    | 5.9693685   | 6.478172    | 6.0645967   | 6.4476743   | 5.828999    |
| "Zfp326"  | 8.57976     | 8.233463    | 7.6608796   | 7.654443    | 7.80178     | 7.827537    | 8.386789    | 7.627949    |
| "Zfp329"  | 3.96806365  | 5.0105363   | 5.024255    | 4.9720347   | 5.093376    | 5.6317328   | 5.1849016   | 5.0088246   |
| "Zfp330"  | 8.918215    | 8.323901    | 8.406026    | 8.326335    | 8.77277     | 8.3407755   | 8.335706    | 8.348769    |
| "Zfp334"  | 2.4636965   | 2.33580885  | 2.51006765  | 2.32564975  | 2.365001    | 2.35587075  | 2.4295517   | 2.3518959   |
| "Zfp33b"  | 2.9428098   | 2.5948007   | 2.5674965   | 2.5734525   | 2.6166096   | 2.592105    | 2.6214857   | 2.6015866   |
| "Zfp346"  | 3.2678535   | 3.2328479   | 3.14095105  | 3.2074468   | 3.25153945  | 3.2983541   | 3.246639    | 3.24491115  |
| "Zfp35"   | 6.5194187   | 6.442058    | 6.4496474   | 6.2559032   | 6.92299     | 6.7957783   | 6.5413513   | 6.5662446   |
| "Zfp352"  | 2.4227953   | 2.39644885  | 2.3479737   | 2.3866032   | 2.41824395  | 2.41490175  | 2.41226     | 2.40980995  |
| "Zfp353"  | 3.1030717   | 3.1066027   | 3.0221834   | 3.0580513   | 3.1689572   | 3.1684468   | 3.0504966   | 3.1018367   |
| "Zfp354a" | 4.0522337   | 4.3474064   | 3.6517434   | 4.1539426   | 3.9340773   | 3.9266758   | 3.7465081   | 3.9920669   |
| "Zfp354b" | 3.5536256   | 3.770836    | 3.6818554   | 4.146259    | 4.3907843   | 3.6739054   | 4.1658306   | 4.849887    |
| "Zfp358"  | 2.9034686   | 2.8723934   | 2.8402133   | 2.8660176   | 2.936066    | 2.8784695   | 2.8986003   | 2.8816967   |
| "Zfp36"   | 10.783648   | 7.9908314   | 7.699348    | 7.896427    | 7.8516994   | 7.989892    | 9.007485    | 7.5890565   |
| "Zfp362"  | 5.9044404   | 5.9674535   | 5.5694194   | 5.8598332   | 5.7597995   | 5.7533064   | 5.9300847   | 5.8770194   |
| "Zfp369"  | 2.4582      | 2.4338179   | 2.3483543   | 2.3965695   | 2.4532473   | 2.4477935   | 2.4433105   | 2.4403932   |
| "Zfp361i" | 11.483052   | 9.606723    | 10.750031   | 10.490739   | 9.492192    | 10.463169   | 10.800708   | 10.217804   |
| "Zfp3612" | 10.92293    | 10.276971   | 9.9204645   | 9.941937    | 10.20392    | 10.576607   | 10.077324   | 9.981685    |
| "Zfp37"   | 3.0802342   | 3.05919805  | 2.97225985  | 3.19552365  | 3.0088084   | 3.09125165  | 3.1009108   | 3.102991    |
| "Zfp386"  | 5.88248995  | 5.9794469   | 5.9114378   | 6.06854385  | 5.74353825  | 5.6493359   | 6.3144688   | 6.1099277   |
| "Zfp39"   | 3.1965132   | 3.276933    | 3.349442    | 3.113468    | 3.2608025   | 3.2868388   | 3.1858041   | 3.3414302   |
| "Zfp395"  | 2.4253652   | 2.3923492   | 2.334323    | 2.3802807   | 2.3909316   | 2.4030008   | 2.4140747   | 2.453015    |
| "Zfp398"  | 2.7008202   | 3.3066912   | 2.6641681   | 2.5829105   | 2.676103    | 2.6897817   | 2.6401749   | 2.685318    |

|             |             |             |             |             |             |             |             |             |
|-------------|-------------|-------------|-------------|-------------|-------------|-------------|-------------|-------------|
| "Zfp40"     | 3.1659632   | 3.2134414   | 3.1341338   | 3.1323643   | 3.1902843   | 3.1887245   | 3.1984053   | 3.2443027   |
| "Zfp410"    | 7.2803528   | 6.87018675  | 6.22098615  | 6.5063808   | 7.033963    | 7.0840295   | 6.57083915  | 6.8118069   |
| "Zfp418"    | 2.6582432   | 2.6308868   | 2.7724726   | 2.609775    | 2.6617656   | 2.660032    | 2.6329005   | 2.641016    |
| "Zfp42"     | 2.5444026   | 2.5131648   | 2.4236836   | 2.4892735   | 2.536024    | 2.5360837   | 2.5287566   | 2.5220861   |
| "Zfp422"    | 6.352132    | 6.6850634   | 6.920938    | 6.7265716   | 6.7714806   | 6.8941936   | 7.281657    | 7.0572996   |
| "Zfp423"    | 2.3953593   | 2.359207    | 2.3132863   | 2.3380651   | 2.378821    | 2.37329     | 2.3725486   | 2.367377    |
| "Zfp426"    | 4.028885    | 5.338646    | 5.3447266   | 5.6455665   | 5.4150176   | 5.3811035   | 5.551728    | 5.3290353   |
| "Zfp428"    | 2.486589    | 2.3242939   | 2.2528272   | 2.3083854   | 2.328189    | 2.3268788   | 2.3457017   | 2.320659    |
| "Zfp445"    | 5.373043    | 6.1156088   | 5.657248    | 6.23961255  | 6.3987155   | 6.1601119   | 6.3046833   | 6.4860604   |
| "Zfp451"    | 4.79156755  | 4.5077642   | 4.34555795  | 4.6501837   | 4.76775885  | 4.91184985  | 4.6805548   | 4.6206262   |
| "Zfp455"    | 3.6196465   | 3.628849    | 3.3287148   | 3.4811778   | 3.7495604   | 3.7541325   | 3.6750371   | 3.9893327   |
| "Zfp46"     | 4.06141055  | 4.11425805  | 4.0831247   | 4.08466305  | 4.2478696   | 4.1330049   | 4.1319801   | 4.11898385  |
| "Zfp467"    | 2.4378636   | 3.4961275   | 3.698846    | 3.43073845  | 2.8707708   | 3.4566186   | 3.61828085  | 3.526316    |
| "Zfp472"    | 5.9272213   | 4.5969877   | 4.32253     | 4.665387    | 4.692031    | 4.475053    | 4.6958942   | 4.717449    |
| "Zfp474"    | 2.9723833   | 2.98903     | 2.7967143   | 2.9451127   | 2.9937594   | 2.991335    | 2.995116    | 3.0010934   |
| "Zfp503"    | 4.45594515  | 4.52356065  | 5.094783    | 4.62987865  | 4.4080031   | 4.4872571   | 5.24141415  | 4.58056105  |
| "Zfp51"     | 5.5809956   | 5.1454782   | 4.6015544   | 4.7299104   | 5.0920935   | 5.2822595   | 5.8578124   | 4.863923    |
| "Zfp518b"   | 2.8890238   | 2.980033    | 3.655188    | 2.9168458   | 2.994439    | 2.989068    | 3.7057474   | 2.8722608   |
| "Zfp52"     | 3.4110972   | 3.12025655  | 3.45983175  | 3.49068345  | 3.4748488   | 3.49340425  | 3.4519856   | 3.2682238   |
| "Zfp521"    | 2.594851    | 2.4724715   | 2.5383267   | 2.5538943   | 2.5814698   | 2.5855608   | 2.6831882   | 2.5792263   |
| "Zfp524"    | 5.7327256   | 5.8122206   | 5.0411196   | 5.4434633   | 5.118695    | 6.115896    | 5.466013    | 5.6276436   |
| "Zfp53"     | 4.2389402   | 4.3287606   | 4.5936937   | 4.295       | 4.7922106   | 4.4181294   | 5.130888    | 4.287132    |
| "Zfp532"    | 4.632168    | 4.6740775   | 5.330182    | 5.276929    | 4.6856647   | 4.362358    | 5.2234993   | 4.639986    |
| "Zfp54"     | 2.841053    | 2.9990149   | 3.5065043   | 2.9513657   | 2.9617305   | 3.010216    | 3.7393954   | 3.386638    |
| "Zfp553"    | 3.8420524   | 3.39317635  | 3.4084148   | 3.48763115  | 3.82934805  | 3.6605403   | 3.6559812   | 3.8299057   |
| "Zfp566"    | 2.8405252   | 2.824075    | 2.8213718   | 2.7854595   | 2.8629475   | 2.8608108   | 2.8788857   | 2.8636975   |
| "Zfp568"    | 5.24569115  | 4.71766065  | 4.43559435  | 4.7096661   | 4.79223695  | 4.88058     | 4.9133651   | 4.90597665  |
| "Zfp574"    | 5.380318    | 5.4212695   | 5.0312296   | 5.3471621   | 5.4407821   | 5.55450035  | 5.4077649   | 5.38393355  |
| "Zfp59"     | 2.4511836   | 2.4170187   | 2.3377194   | 2.3799894   | 2.443923    | 2.4271898   | 2.4305823   | 2.4277005   |
| "Zfp593"    | 2.4895153   | 2.4240322   | 2.3658967   | 2.550075    | 2.4465175   | 2.4416656   | 2.4430914   | 2.4357116   |
| "Zfp598"    | 8.698594    | 8.454928    | 8.060401    | 8.031967    | 8.230911    | 8.783433    | 7.9385967   | 8.294901    |
| "Zfp60"     | 2.6540475   | 2.634618    | 2.5263598   | 2.5979316   | 2.6730194   | 2.6698232   | 2.6428676   | 2.6606884   |
| "Zfp605"    | 2.39574     | 2.3678763   | 2.309588    | 2.352909    | 2.3912313   | 2.3883848   | 2.3902159   | 2.3829613   |
| "Zfp61"     | 2.676858    | 2.6434624   | 2.9124823   | 2.623688    | 2.6575327   | 2.6534815   | 2.6675448   | 2.647672    |
| "Zfp612"    | 8.58868     | 7.762166    | 6.736392    | 6.782519    | 7.2065854   | 7.7808104   | 6.830349    | 6.8471727   |
| "Zfp617"    | 8.324238    | 8.580009    | 7.7725563   | 8.071349    | 8.356216    | 8.489778    | 8.637236    | 8.282888    |
| "Zfp62"     | 4.4245396   | 4.7717323   | 4.4656712   | 4.6020585   | 4.83562185  | 4.93041445  | 5.6903735   | 4.65039445  |
| "Zfp622"    | 9.72087275  | 9.05880875  | 8.21041625  | 8.15289135  | 8.41317415  | 9.0667515   | 7.94634715  | 8.2243025   |
| "Zfp623"    | 8.722092    | 7.5997868   | 6.6582575   | 6.9375086   | 7.8618565   | 7.88198     | 6.7965403   | 7.4854226   |
| "Zfp626"    | 2.9474924   | 2.975703    | 2.9316235   | 2.896259    | 2.9747596   | 2.9640172   | 2.9770207   | 2.9394019   |
| "Zfp639"    | 6.992819    | 6.9528456   | 6.531296    | 6.604052    | 7.0022535   | 7.2898817   | 6.740621    | 6.937455    |
| "Zfp64"     | 3.7150782   | 3.65992595  | 3.6288761   | 3.5679569   | 3.700704    | 3.6834546   | 3.8319975   | 3.69125165  |
| "Zfp644"    | 5.533439375 | 5.6018565   | 5.2365148   | 5.392346875 | 5.38420405  | 5.63890955  | 5.43174155  | 5.4612519   |
| "Zfp654"    | 5.844374    | 6.25248     | 5.907931    | 5.9908514   | 6.1059084   | 5.779781    | 5.9709144   | 5.7275724   |
| "Zfp672"    | 5.9116035   | 6.116396    | 5.812888    | 5.735898    | 6.2907505   | 6.0819206   | 6.16766     | 5.719469    |
| "Zfp68"     | 6.1177857   | 5.48153495  | 5.28255135  | 5.60030925  | 5.7759025   | 6.20957255  | 6.012985    | 6.0256936   |
| "Zfp688"    | 3.6943944   | 3.5197117   | 3.447671    | 3.5101902   | 3.0407596   | 3.529009    | 3.542444    | 3.5225823   |
| "Zfp689"    | 2.927617    | 2.9042358   | 2.860498    | 2.87814     | 2.9120204   | 2.9049728   | 2.9170475   | 2.8981369   |
| "Zfp7"      | 2.5362058   | 2.511302    | 2.461242    | 2.4618917   | 2.5341718   | 2.5335245   | 2.5392134   | 2.543009    |
| "Zfp703"    | 5.5789986   | 5.383421    | 5.323764    | 5.349656    | 4.9349694   | 5.7382975   | 5.0888777   | 5.3623667   |
| "Zfp704"    | 3.43460225  | 3.88203075  | 3.8606199   | 3.6517497   | 3.9005721   | 3.571617    | 4.179954    | 3.51229435  |
| "Zfp707"    | 6.411716    | 4.900152    | 4.7608843   | 5.0435524   | 4.435865    | 5.600651    | 4.9992523   | 5.255371    |
| "Zfp709"    | 3.6205392   | 3.4871578   | 3.6849363   | 3.6422548   | 3.8246899   | 4.016907    | 4.3571224   | 3.979706    |
| "Zfp71-rs1" | 6.8991375   | 6.5261025   | 6.326774    | 6.590638    | 6.360541    | 6.6563272   | 7.236459    | 6.443503    |
| "Zfp740"    | 5.1167183   | 5.097906    | 4.6947403   | 4.9125605   | 5.2640467   | 5.351175    | 5.122379    | 5.1017265   |
| "Zfp746"    | 8.026871    | 7.0027976   | 5.748114    | 5.870628    | 6.2513256   | 6.0238204   | 5.6324844   | 5.4378076   |
| "Zfp758"    | 5.436569    | 6.1070585   | 5.5572844   | 6.1621246   | 6.151259    | 6.501915    | 6.571349    | 6.840716    |
| "Zfp759"    | 2.9388406   | 2.9584033   | 2.9136653   | 3.0567274   | 2.9762378   | 2.9693542   | 3.0533535   | 2.9697368   |
| "Zfp764"    | 5.445307    | 5.130767    | 5.483053    | 5.337205    | 5.7552156   | 5.4584365   | 5.4722805   | 5.452931    |
| "Zfp768"    | 5.719172    | 5.5937524   | 5.5945616   | 5.4991436   | 5.6460214   | 6.3614035   | 5.6579547   | 6.097885    |
| "Zfp771"    | 4.998991    | 4.88929     | 4.4234805   | 4.5884285   | 4.507806    | 5.196723    | 4.5100327   | 4.6035957   |
| "Zfp772"    | 3.0830677   | 3.025178    | 2.8503737   | 2.9366038   | 3.0689073   | 3.118781    | 3.071106    | 3.1383605   |
| "Zfp777"    | 4.668877    | 4.8687906   | 4.605744    | 4.652535    | 4.6639075   | 4.5897446   | 4.583968    | 4.636783    |
| "Zfp787"    | 3.9485095   | 4.425301    | 4.149123    | 4.1539974   | 4.945405    | 5.190243    | 4.9233913   | 4.778691    |
| "Zfp790"    | 3.9313079   | 4.73508875  | 4.9327786   | 5.32234505  | 5.6876893   | 5.4404315   | 5.49550475  | 5.4002415   |
| "Zfp81"     | 2.8598614   | 2.821874    | 2.6556623   | 2.8078504   | 2.9195442   | 2.845604    | 2.8392391   | 2.835966    |
| "Zfp810"    | 5.7068887   | 7.801779    | 6.5707664   | 6.05658     | 5.7725425   | 5.9441395   | 5.0088515   | 5.7934465   |
| "Zfp820"    | 3.2391574   | 3.1763504   | 3.1059177   | 3.1674075   | 3.2772717   | 3.247027    | 3.4705102   | 3.4047236   |
| "Zfp825"    | 5.3848927   | 6.49802635  | 6.32274125  | 6.8648543   | 6.8793957   | 6.3015106   | 6.8106883   | 7.29990635  |
| "Zfp826"    | 3.111596    | 3.1836643   | 3.5365949   | 3.7242305   | 3.4726412   | 3.4065015   | 3.2911358   | 3.5851293   |
| "Zfp830"    | 5.3664441   | 5.295495133 | 4.963278567 | 5.092159133 | 5.356061533 | 5.268670867 | 5.280366733 | 5.238171633 |
| "Zfp84"     | 2.7963405   | 3.37311     | 3.7925923   | 3.6611629   | 3.7374568   | 3.4398704   | 3.6304393   | 3.4633315   |
| "Zfp868"    | 4.033431    | 3.851625    | 3.6793175   | 3.735017    | 3.8323407   | 4.1703725   | 3.9434714   | 4.152276    |
| "Zfp869"    | 7.0541697   | 6.3962245   | 5.901289    | 6.102181    | 6.5853024   | 6.1664963   | 6.8317523   | 5.9004436   |
| "Zfp87"     | 3.6324217   | 4.5582867   | 4.4281473   | 4.384182    | 3.9867282   | 4.4284563   | 4.033534    | 4.296562    |
| "Zfp871"    | 9.797465    | 9.954274    | 9.519096    | 10.251972   | 10.165395   | 10.47483    | 10.208238   | 10.762843   |
| "Zfp90"     | 4.3530917   | 3.2981007   | 4.3760176   | 3.6439183   | 3.450052    | 3.427565    | 3.8962326   | 3.6890388   |
| "Zfp91"     | 7.390360067 | 7.620753633 | 6.997588367 | 7.290043    | 7.700279333 | 7.771127    | 7.148499867 | 7.583264    |
| "Zfp930"    | 3.687034    | 3.6902366   | 3.689304    | 3.7459376   | 3.7378016   | 3.7373412   | 3.7498822   | 3.742392    |
| "Zfp931"    | 7.203213    | 6.886612    | 6.8126836   | 6.93277     | 6.481998    | 6.282603    | 7.0168366   | 6.8204355   |
| "Zfp932"    | 5.337546    | 5.34131     | 6.247198    | 6.6618204   | 5.8066893   | 5.8115873   | 6.667671    | 6.5401816   |

|            |             |             |             |             |             |             |             |             |
|------------|-------------|-------------|-------------|-------------|-------------|-------------|-------------|-------------|
| "Zfp936"   | 2.4012523   | 2.3672473   | 2.2947438   | 2.3389783   | 2.3926978   | 2.4194918   | 2.385088    | 2.395513    |
| "Zfp937"   | 2.6337664   | 2.6211877   | 2.5934289   | 2.6294312   | 2.650332    | 2.654729    | 2.6586988   | 2.6414154   |
| "Zfp940"   | 2.3822625   | 2.3493085   | 2.3105354   | 2.3251445   | 2.368193    | 2.3587215   | 2.370845    | 2.3533008   |
| "Zfp942"   | 4.8012286   | 5.023839    | 4.6848135   | 4.83523155  | 4.9403827   | 4.79952215  | 5.12457155  | 4.8785411   |
| "Zfp943"   | 5.19243755  | 5.1414893   | 4.9558784   | 5.0850976   | 5.1762328   | 5.17919005  | 5.29799735  | 5.3135415   |
| "Zfp944"   | 3.3739071   | 3.5173292   | 3.14938425  | 3.30959465  | 3.33684535  | 3.24735805  | 3.3429186   | 3.44564175  |
| "Zfp948"   | 5.425487    | 4.9276466   | 4.8081107   | 4.7936287   | 4.4844337   | 4.943368    | 5.1359      | 5.3710575   |
| "Zfp954"   | 4.7316113   | 4.297599    | 4.243633    | 4.2671614   | 4.3490906   | 4.6220303   | 4.467294    | 4.2035456   |
| "Zfp955a"  | 6.849605    | 6.729703    | 7.089788    | 7.3779216   | 7.3966365   | 6.7197156   | 7.652645    | 7.2198796   |
| "Zfp955b"  | 6.37780335  | 6.1837583   | 6.49176715  | 6.26194915  | 6.2295115   | 6.0322585   | 6.4804821   | 6.24612365  |
| "Zfp958"   | 5.2269454   | 5.0588355   | 4.6320796   | 4.927189    | 5.1799173   | 5.1339307   | 5.1137934   | 5.114112    |
| "Zfp959"   | 6.044494    | 5.820581    | 5.5295773   | 5.6616936   | 6.1503353   | 6.009983    | 5.8584466   | 6.0628004   |
| "Zfp960"   | 8.248183    | 8.264911    | 7.658496    | 8.682747    | 7.7229557   | 8.323294    | 8.282346    | 8.617252    |
| "Zfpl1"    | 4.5407443   | 4.706297    | 4.394599    | 4.396817    | 4.4208517   | 4.4187136   | 4.3511953   | 4.28116     |
| "Zfpm1"    | 5.084856    | 5.190686    | 4.702051    | 5.0772986   | 5.2671885   | 5.4165235   | 4.851857    | 5.3913774   |
| "Zfpm2"    | 2.92348365  | 2.8214654   | 2.7295941   | 2.83398675  | 2.8556376   | 2.84972205  | 2.94224775  | 2.88830125  |
| "Zfr"      | 6.8248908   | 6.72406025  | 6.4391378   | 6.5828892   | 6.75148835  | 6.8703005   | 6.5064236   | 6.19554935  |
| "Zfk"      | 5.0479432   | 4.76449765  | 4.491171025 | 4.529677975 | 4.7871467   | 4.7955806   | 4.758208075 | 4.619771375 |
| "Zfy1"     | 3.21318175  | 3.37712425  | 3.0378642   | 3.19300055  | 3.34531565  | 3.59162595  | 3.1341081   | 3.3848272   |
| "Zfy2"     | 2.8535478   | 2.8211176   | 2.7807903   | 2.7543666   | 2.839816    | 2.8560233   | 2.8182585   | 2.8249762   |
| "Zfyve16"  | 3.2001321   | 3.2142851   | 3.6199362   | 3.1887295   | 3.2073264   | 3.8000915   | 4.0484076   | 3.0311794   |
| "Zfyve19"  | 7.0276694   | 7.3472157   | 7.1369944   | 7.1438155   | 6.931452    | 7.218189    | 7.0101027   | 6.9554677   |
| "Zfyve21"  | 8.4547897   | 9.3624385   | 9.349619    | 9.4711313   | 9.0474615   | 8.28953     | 9.1363635   | 9.1337545   |
| "Zfyve26"  | 6.5738344   | 7.191027    | 8.272914    | 7.842852    | 7.2719355   | 7.759368    | 7.353621    | 7.544356    |
| "Zfyve27"  | 3.40371735  | 3.22782555  | 3.3034079   | 3.3384645   | 3.2958985   | 3.3271719   | 3.3104294   | 3.2729391   |
| "Zg16"     | 2.8716345   | 2.8436655   | 2.740461    | 2.81398355  | 2.89291615  | 2.88875275  | 2.8492501   | 2.9013382   |
| "Zgpat"    | 4.3324717   | 4.3055749   | 4.5142666   | 4.3049791   | 4.08477855  | 4.25693735  | 4.36805295  | 4.3030008   |
| "Zhxl"     | 8.669545    | 8.380466    | 8.353281    | 8.601938    | 8.684812    | 8.637922    | 8.631161    | 8.661058    |
| "Zic2"     | 2.4848325   | 2.4654503   | 2.419729    | 2.4434803   | 2.4850607   | 2.479972    | 2.4695234   | 2.4900432   |
| "Zic4"     | 2.3754196   | 2.3517284   | 2.2620332   | 2.325531    | 2.3748972   | 2.3701558   | 2.3592863   | 2.356731    |
| "Zic5"     | 2.6033532   | 2.5724331   | 2.49661965  | 2.53849385  | 2.62252475  | 2.59435585  | 2.5786556   | 2.59779155  |
| "Zik1"     | 2.7336161   | 2.71039975  | 2.64621635  | 2.67247055  | 2.7252081   | 2.7160971   | 2.73988035  | 2.71404735  |
| "Zkscan1"  | 6.6315155   | 7.4787717   | 6.5336437   | 7.4270086   | 7.238757    | 8.271854    | 6.897653    | 7.385828    |
| "Zkscan14" | 4.408987    | 4.19806305  | 3.7344552   | 3.79285395  | 4.03102145  | 3.93868835  | 3.5880444   | 4.1922235   |
| "Zkscan3"  | 7.307058    | 8.89707425  | 8.408555    | 8.4904785   | 8.46618075  | 8.9593375   | 8.4800575   | 8.3453855   |
| "Zkscan5"  | 5.3034267   | 6.1021385   | 5.537669    | 5.9899898   | 5.7652516   | 5.476083    | 5.406187    | 5.654291    |
| "Zkscan6"  | 4.51423405  | 4.7468715   | 4.36410405  | 4.49105585  | 4.62562945  | 5.107857    | 4.59581965  | 4.6538248   |
| "Zmat2"    | 4.78002225  | 5.0263773   | 4.93896275  | 4.8340534   | 4.69186405  | 4.64942075  | 4.7144998   | 4.7420262   |
| "Zmat3"    | 4.626856    | 5.0680857   | 4.6356173   | 4.828261    | 5.440684    | 5.5556746   | 4.9690433   | 4.5981426   |
| "Zmat5"    | 2.3238635   | 2.5419674   | 3.3150027   | 2.2714343   | 2.1323144   | 2.2813158   | 2.5140705   | 2.2949238   |
| "Zmiz2"    | 3.9716682   | 4.5510817   | 4.066237    | 4.119533    | 4.7569056   | 4.2035728   | 4.2173634   | 4.2034745   |
| "Zmpste24" | 9.311261    | 9.853443    | 9.83546     | 9.869979    | 9.728535    | 9.652864    | 9.779282    | 9.814745    |
| "Zmym1"    | 1.8471831   | 3.1253023   | 3.468714    | 3.599872    | 3.1806993   | 3.252252    | 3.6300852   | 3.3695397   |
| "Zmym3"    | 2.88794515  | 2.7255013   | 2.7224909   | 2.74445295  | 2.8688773   | 3.2263788   | 2.8800167   | 2.818251    |
| "Zmym4"    | 5.1594334   | 5.2659874   | 5.2563057   | 5.4024644   | 5.219604    | 5.245811    | 5.7059345   | 5.3300123   |
| "Zmym5"    | 9.1506195   | 9.1046505   | 8.454125    | 9.044378    | 8.7438345   | 9.343881    | 8.758415    | 8.970812    |
| "Zmynd10"  | 2.8969023   | 2.862011    | 2.8365273   | 2.8393457   | 2.9032662   | 2.8749619   | 2.8878994   | 2.8682704   |
| "Zmynd11"  | 8.3715628   | 8.8561739   | 8.263980167 | 8.3747945   | 8.5500751   | 8.610777667 | 8.6332058   | 8.4961619   |
| "Zmynd19"  | 4.28541     | 4.2559085   | 4.108712    | 3.8100786   | 3.8743606   | 4.7911057   | 4.114496    | 3.4559877   |
| "Zmynd8"   | 7.431671    | 7.7309566   | 8.45943     | 8.363947    | 8.02106     | 8.780539    | 8.432037    | 8.139042    |
| "Znfx1"    | 5.743833    | 6.195723    | 7.112577    | 6.8686504   | 6.0855412   | 5.247609    | 6.1085877   | 6.2408686   |
| "Znhit1"   | 8.20691575  | 8.61510735  | 8.279902    | 8.58255315  | 8.341692    | 8.28888105  | 8.4408845   | 8.45654585  |
| "Znhit2"   | 7.3665266   | 7.245446    | 6.611082    | 6.5812917   | 7.015927    | 7.342316    | 6.7903566   | 7.141148    |
| "Znhit3"   | 6.671209    | 6.6244564   | 6.6998763   | 6.822339    | 6.186444    | 6.254769    | 6.466384    | 6.261775    |
| "Znrd1"    | 7.08142     | 7.413612    | 7.695686    | 7.5621634   | 7.3740525   | 7.556085    | 7.458322    | 7.259026    |
| "Znrd1as"  | 6.9959307   | 7.4766607   | 7.1803265   | 7.5179415   | 6.9052796   | 7.432843    | 7.3023343   | 7.0731196   |
| "Znrf1"    | 4.5507067   | 4.068487733 | 4.135173167 | 4.4462503   | 4.109812333 | 4.328869667 | 4.056071567 | 4.434612833 |
| "Znrf2"    | 6.7123453   | 7.55555375  | 7.111653025 | 7.58010135  | 7.402530175 | 7.32507565  | 7.4869765   | 7.647007825 |
| "Zp3r"     | 2.6963773   | 2.6691475   | 2.5751584   | 2.6168725   | 2.7016456   | 2.701472    | 2.6767921   | 2.6987915   |
| "Zpbp"     | 2.4851031   | 2.4566278   | 2.375236    | 2.4117682   | 2.4820375   | 2.4791327   | 2.4716144   | 2.4720416   |
| "Zranb1"   | 7.180982333 | 7.458948    | 6.375166033 | 7.1577408   | 7.2491496   | 7.198528233 | 7.173106    | 7.448078333 |
| "Zranb2"   | 8.174175    | 8.160469    | 8.386694    | 8.496826    | 8.506638    | 9.126314    | 8.727095    | 8.811558    |
| "Zrsr1"    | 8.048276    | 7.8273997   | 7.0188212   | 7.370181    | 7.327059    | 7.8299785   | 7.2422667   | 7.325115    |
| "Zrsr2"    | 4.7981102   | 4.6317058   | 4.34871615  | 4.549068    | 4.41539785  | 4.25813985  | 4.24652715  | 4.2572091   |
| "Zscan12"  | 6.349161    | 6.3730097   | 5.509424    | 5.712797    | 5.474827    | 5.901147    | 5.9135847   | 5.1837473   |
| "Zscan21"  | 5.807730325 | 6.342448675 | 6.087636125 | 6.00228855  | 6.193466675 | 6.5916503   | 6.070657525 | 6.07901305  |
| "Zscan22"  | 2.8882523   | 2.8501725   | 2.7809534   | 2.8395593   | 2.86902     | 2.8634675   | 2.8743162   | 2.856702    |
| "Zswim1"   | 2.9151795   | 2.8820105   | 3.006195    | 2.7981498   | 3.3597155   | 2.8748338   | 2.9292333   | 3.2561142   |
| "Zswim6"   | 3.5048754   | 3.1052      | 3.363698    | 3.966678    | 3.1678169   | 3.1189704   | 3.2574556   | 3.1126196   |
| "Zswim7"   | 6.162145    | 7.124638    | 6.535098    | 6.6839046   | 6.888026    | 6.7349257   | 6.6280746   | 6.563883    |
| "Zufsp"    | 6.7442713   | 5.705543    | 7.169892    | 7.004656    | 6.416374    | 5.87264     | 6.957492    | 6.479296    |
| "Zw10"     | 7.810585    | 7.4910326   | 7.5033636   | 7.440952    | 7.690123    | 7.8459144   | 7.4488845   | 7.6212955   |
| "Zwilch"   | 2.4705615   | 2.4443934   | 2.465639    | 2.4194298   | 2.4646196   | 2.4574528   | 2.471586    | 2.4755702   |
| "Zwint"    | 6.845996867 | 6.250300783 | 6.025331783 | 5.618958067 | 5.9936271   | 6.00360045  | 5.892318267 | 5.80997785  |
| "Zxdc"     | 5.56261625  | 5.7432245   | 5.31466525  | 5.41961915  | 5.37991785  | 6.32635835  | 5.65546885  | 5.22903365  |
| "Zyg11b"   | 7.248085    | 7.3084115   | 6.28170615  | 6.4352741   | 6.9286715   | 6.713843    | 6.80362685  | 6.97315265  |
| "Zyx"      | 4.33870295  | 4.2191328   | 4.1626955   | 4.1706431   | 4.0181994   | 3.6361405   | 3.8684791   | 3.92907785  |
| "Zzz3"     | 8.162881    | 7.4701147   | 7.4300575   | 7.344312    | 7.6211495   | 7.9754205   | 7.495609    | 7.9102607   |

[illegible]

| Agi <sup>Wt</sup> -Fasted<br>Agi <sup>Wt</sup> -Fasted<br>Comparison | Agi <sup>Wt</sup> -Fasted vs<br>Agi <sup>Wt</sup> -Fasted |                                 |                                 |                                  | Agi <sup>Wt</sup> -Fasted vs<br>Agi <sup>Wt</sup> -Fasted |                                 |                                 |                                  | Regulation | Gene List   |                                   |                |
|----------------------------------------------------------------------|-----------------------------------------------------------|---------------------------------|---------------------------------|----------------------------------|-----------------------------------------------------------|---------------------------------|---------------------------------|----------------------------------|------------|-------------|-----------------------------------|----------------|
|                                                                      | Agi <sup>Wt</sup> -Fasted (Avg)                           | Agi <sup>Wt</sup> -Fasted (Min) | Agi <sup>Wt</sup> -Fasted (Max) | Agi <sup>Wt</sup> -Fasted (Diff) | Agi <sup>Wt</sup> -Fasted (Avg)                           | Agi <sup>Wt</sup> -Fasted (Min) | Agi <sup>Wt</sup> -Fasted (Max) | Agi <sup>Wt</sup> -Fasted (Diff) |            |             |                                   |                |
| "tuit2"                                                              | 1.349372                                                  | 2.612593                        | 10.597212                       | 6.848175                         | "tuit2t"                                                  | 1.034668                        | 8.540698                        | -5.4863                          | 7.4883     | 4.824784    | Down in Agi <sup>Wt</sup> -Fasted | Sufu2          |
| "tsp3a1a"                                                            | 1.86171                                                   | 7.792                           | 14.1078                         | 14.1078                          | "tsp3a1a"                                                 | 1.575479                        | 14.0913                         | -13.224795                       | 14.0913    | 4.522495    | Down in Agi <sup>Wt</sup> -Fasted | Sufu34.1a      |
| "tsp3a1a"                                                            | 7.78087                                                   | 13.34262                        | 14.1078                         | 14.1078                          | "tsp3a1a"                                                 | 1.408813                        | 14.0913                         | -13.224795                       | 14.0913    | 4.522495    | Down in Agi <sup>Wt</sup> -Fasted | Sufu34.1a      |
| "tsp3a1a"                                                            | 11.85719                                                  | 14.881362                       | 16.29012                        | 12.860183                        | "tsp3a1a"                                                 | 9.6546218                       | 12.778859                       | -13.972975                       | 12.778859  | 17.876604   | Down in Agi <sup>Wt</sup> -Fasted | Retart         |
| "tsp3a4"                                                             | 7.097575                                                  | 4.762077                        | 10.42435                        | 5.83904                          | "tsp3a4"                                                  | 5.9297965                       | 8.881025                        | -3.051219                        | 3.051219   | 20.253228   | Down in Agi <sup>Wt</sup> -Fasted | Sufu34.4       |
| "tsp3a4"                                                             | 1.520260                                                  | 1.520260                        | 1.520260                        | 0.000000                         | "tsp3a4"                                                  | 6.596024                        | 8.540698                        | -1.944674                        | 8.540698   | 1.944674    | Down in Agi <sup>Wt</sup> -Fasted | Sufu34.4       |
| "tsp3a4"                                                             | 5.127778                                                  | 8.437862                        | 10.42435                        | 2.18269                          | "tsp3a4"                                                  | 6.82782                         | 9.700336                        | -2.872516                        | 2.872516   | 7.3242149   | Down in Agi <sup>Wt</sup> -Fasted | Lea2           |
| "tsp3b1"                                                             | 2.003857                                                  | 2.501872                        | 6.086063                        | 2.626922                         | "tsp3b1"                                                  | 2.4627885                       | 5.306645                        | -2.848861                        | 2.848861   | 17.820207   | Down in Agi <sup>Wt</sup> -Fasted | Sufu2b1        |
| "tsp3b1"                                                             | 1.648825                                                  | 1.648825                        | 1.648825                        | 0.000000                         | "tsp3b1"                                                  | 6.7982159                       | 8.540698                        | -1.742482                        | 8.540698   | 1.742482    | Down in Agi <sup>Wt</sup> -Fasted | Sufu2b1        |
| "tsp3b1"                                                             | 5.243014                                                  | 2.951855                        | 10.798767                       | 7.837215                         | "tsp3b1"                                                  | 3.6471975                       | 10.10105                        | -7.553875                        | 7.553875   | 17.645082   | Down in Agi <sup>Wt</sup> -Fasted | Ac3            |
| "BC005512"                                                           | 1.367921                                                  | 5.020752                        | 10.587242                       | 7.083163                         | "BC005512"                                                | 1.8821075                       | 6.6571925                       | -2.570875                        | 2.570875   | 5.99094136  | Down in Agi <sup>Wt</sup> -Fasted | BC005512       |
| "tsp3b1"                                                             | 7.6182156                                                 | 10.587242                       | 10.587242                       | 0.000000                         | "tsp3b1"                                                  | 6.61799846                      | 8.540698                        | -1.922751                        | 8.540698   | 2.141844    | Down in Agi <sup>Wt</sup> -Fasted | BC005512       |
| "tsp3b1"                                                             | 5.349766                                                  | 4.642927                        | 7.481314                        | 1.125043                         | "tsp3b1"                                                  | 4.9613695                       | 7.31822                         | -2.356855                        | 2.356855   | 17.1231393  | Down in Agi <sup>Wt</sup> -Fasted | hine           |
| "G02"                                                                | 3.7272204                                                 | 6.745733                        | 7.506166                        | 7.288455                         | "G02"                                                     | 5.2392385                       | 7.583713                        | -2.344673                        | 2.344673   | 19.0716242  | Down in Agi <sup>Wt</sup> -Fasted | G02            |
| "G02"                                                                | 1.467153                                                  | 6.745733                        | 7.506166                        | 7.288455                         | "G02"                                                     | 5.2392385                       | 7.509925                        | -2.244735                        | 2.244735   | 5.0789679   | Down in Agi <sup>Wt</sup> -Fasted | G02            |
| "G02"                                                                | 1.01449                                                   | 8.01713                         | 9.12149                         | 7.21827                          | "G02"                                                     | 1.01449                         | 8.01713                         | -7.00264                         | 7.00264    | 2.29862     | Down in Agi <sup>Wt</sup> -Fasted | G02            |
| "Sufu2d1"                                                            | 4.081405                                                  | 5.7778935                       | 7.5971215                       | 6.7131335                        | "Sufu2d1"                                                 | 4.2968161                       | 7.571227                        | -2.274415                        | 2.274415   | 4.6803623   | Down in Agi <sup>Wt</sup> -Fasted | Sufu2d1        |
| "Whic2"                                                              | 4.2073                                                    | 4.2073                          | 4.2073                          | 0.000000                         | "Whic2"                                                   | 4.3271398                       | 4.668455                        | -2.14152                         | 2.14152    | 4.4714808   | Down in Agi <sup>Wt</sup> -Fasted | Whic2          |
| "Whic2"                                                              | 5.9284346                                                 | 8.3363                          | 10.42435                        | 2.18269                          | "Whic2"                                                   | 5.9284346                       | 8.3363                          | -2.1108                          | 2.1108     | 11.1108     | Down in Agi <sup>Wt</sup> -Fasted | Whic2          |
| "Rad51b1"                                                            | 3.878578                                                  | 2.570859                        | 6.130586                        | 4.33038                          | "Rad51b1"                                                 | 3.2264585                       | 5.237786                        | -2.062784                        | 2.062784   | 9.0745493   | Down in Agi <sup>Wt</sup> -Fasted | Rad51b1        |
| "LOC100408884"                                                       | 11.08362                                                  | 14.50277                        | 14.62242                        | 14.91581                         | "LOC100408884"                                            | 12.800578                       | 14.786615                       | -1.987087                        | 1.987087   | 3.9616431   | Down in Agi <sup>Wt</sup> -Fasted | LOC100408884   |
| "Cyp11b"                                                             | 10.38265                                                  | 14.10708                        | 14.10708                        | 14.10708                         | "Cyp11b"                                                  | 12.746285                       | 14.23923                        | -1.982475                        | 1.982475   | 8.1557058   | Down in Agi <sup>Wt</sup> -Fasted | Cyp11b         |
| "Cyp21"                                                              | 6.879473                                                  | 5.78665                         | 8.30658                         | 8.299373                         | "Cyp21"                                                   | 6.374203                        | 8.30155                         | -2.925125                        | 2.925125   | 3.79819034  | Down in Agi <sup>Wt</sup> -Fasted | Cyp21          |
| "Creid2"                                                             | 8.098867                                                  | 8.27024                         | 10.60929                        | 4.57424                          | "Creid2"                                                  | 8.184505                        | 10.051205                       | -1.866707                        | 1.866707   | 3.646991912 | Down in Agi <sup>Wt</sup> -Fasted | Creid2         |
| "Creid2"                                                             | 4.316248                                                  | 4.0839                          | 6.335234                        | 5.45727                          | "Creid2"                                                  | 4.430058                        | 5.842181                        | -1.841225                        | 1.841225   | 3.58142999  | Down in Agi <sup>Wt</sup> -Fasted | Creid2         |
| "Creid2"                                                             | 1.020241                                                  | 1.445                           | 8.28262                         | 6.904816                         | "Creid2"                                                  | 1.23147                         | 8.081468                        | -1.811015                        | 1.811015   | 3.55788081  | Down in Agi <sup>Wt</sup> -Fasted | Creid2         |
| "201000381.1R1k"                                                     | 3.7230036                                                 | 4.919173                        | 6.07809                         | 8.65134                          | "201000381.1R1k"                                          | 4.6071005                       | 6.436203                        | -1.829105                        | 1.829105   | 3.55377711  | Down in Agi <sup>Wt</sup> -Fasted | 201000381.1R1k |
| "Dsp"                                                                | 4.7827635                                                 | 9.314529                        | 9.304265                        | 4.818047                         | "Dsp"                                                     | 7.10189275                      | 8.8995307                       | -1.724784                        | 1.724784   | 3.54931848  | Down in Agi <sup>Wt</sup> -Fasted | Dsp            |
| "Dsp"                                                                | 1.4279                                                    | 2.661043                        | 3.1282                          | 1.43511                          | "Dsp"                                                     | 1.001                           | 8.01713                         | -7.01613                         | 7.01613    | 1.813888    | Down in Agi <sup>Wt</sup> -Fasted | Dsp            |
| "Acaal3b"                                                            | 1.190405                                                  | 1.390642                        | 1.645329                        | 1.818061                         | "Acaal3b"                                                 | 1.8223315                       | 1.6149623                       | -1.797293                        | 1.797293   | 4.76576358  | Down in Agi <sup>Wt</sup> -Fasted | Acaal3b        |
| "Abd2"                                                               | 5.5604086                                                 | 3.854537                        | 7.11895                         | 8.2057                           | "Abd2"                                                    | 4.606915                        | 6.252308                        | -1.796257                        | 1.796257   | 4.73181249  | Down in Agi <sup>Wt</sup> -Fasted | Abd2           |
| "Abd2"                                                               | 1.0902                                                    | 2.11627                         | 3.10778                         | 3.0809                           | "Abd2"                                                    | 1.19143                         | 3.10778                         | -1.91634                         | 1.91634    | 3.10778     | Down in Agi <sup>Wt</sup> -Fasted | Abd2           |
| "hnh3a"                                                              | 5.3672435                                                 | 8.20838                         | 8.38985                         | 8.2057                           | "hnh3a"                                                   | 6.7879401                       | 8.562152                        | -1.7646715                       | 1.7646715  | 3.93797296  | Down in Agi <sup>Wt</sup> -Fasted | hnh3a          |
| "hnh3a"                                                              | 1.933774                                                  | 6.13172                         | 7.185448                        | 4.117085                         | "hnh3a"                                                   | 4.987256                        | 5.788156                        | -1.7566045                       | 1.7566045  | 3.33343479  | Down in Agi <sup>Wt</sup> -Fasted | hnh3a          |
| "hnh3a"                                                              | 10.80782                                                  | 10.80782                        | 10.80782                        | 0.000000                         | "hnh3a"                                                   | 10.286272                       | 10.80782                        | -0.52155                         | 0.52155    | 1.2725132   | Down in Agi <sup>Wt</sup> -Fasted | hnh3a          |
| "hnh3a"                                                              | 8.51773                                                   | 10.8354                         | 11.46546                        | 11.03865                         | "hnh3a"                                                   | 8.787255                        | 11.55449                        | -1.72625                         | 1.72625    | 3.3541833   | Down in Agi <sup>Wt</sup> -Fasted | Dc01           |
| "H100062.1R1k"                                                       | 2.064896                                                  | 7.702973                        | 10.04844                        | 4.776687                         | "H100062.1R1k"                                            | 1.1898063                       | 4.9057605                       | -1.724787                        | 1.724787   | 3.20574223  | Down in Agi <sup>Wt</sup> -Fasted | H100062.1R1k   |
| "G0207"                                                              | 4.470828                                                  | 4.70593                         | 6.663164                        | 6.93842                          | "G0207"                                                   | 4.7143153                       | 4.628718                        | -1.7176025                       | 1.7176025  | 3.88118973  | Down in Agi <sup>Wt</sup> -Fasted | G0207          |
| "C04031"                                                             | 4.831169                                                  | 4.831169                        | 4.831169                        | 0.000000                         | "C04031"                                                  | 4.2968161                       | 7.1554                          | -2.86862                         | 2.86862    | 3.55377711  | Down in Agi <sup>Wt</sup> -Fasted | C04031         |
| "G02"                                                                | 6.60339                                                   | 8.50284                         | 9.89044                         | 8.60685                          | "G02"                                                     | 7.55508                         | 9.248645                        | -1.693585                        | 1.693585   | 2.3362423   | Down in Agi <sup>Wt</sup> -Fasted | G02            |
| "Dsp"                                                                | 6.28465                                                   | 8.98587                         | 10.25661                        | 8.5917                           | "Dsp"                                                     | 7.607025                        | 9.29155                         | -1.683895                        | 1.683895   | 2.31789276  | Down in Agi <sup>Wt</sup> -Fasted | Dsp            |
| "G0207"                                                              | 10.35765                                                  | 10.35765                        | 10.35765                        | 0.000000                         | "G0207"                                                   | 10.7849292                      | 10.7849292                      | -0.000000                        | 0.000000   | 1.673183    | Down in Agi <sup>Wt</sup> -Fasted | G0207          |
| "Mcp1"                                                               | 7.4212005                                                 | 10.61624                        | 9.73452                         | 11.611675                        | "Mcp1"                                                    | 8.0187105                       | 10.0713423                      | -1.65424                         | 1.65424    | 3.14797418  | Down in Agi <sup>Wt</sup> -Fasted | Ac01           |
| "Mcp1"                                                               | 8.40483                                                   | 8.05279                         | 10.137957                       | 9.91108                          | "Mcp1"                                                    | 8.4753                          | 10.064825                       | -1.589125                        | 1.589125   | 3.90014205  | Down in Agi <sup>Wt</sup> -Fasted | Mcp1           |
| "G0207"                                                              | 3.852                                                     | 3.852                           | 3.852                           | 0.000000                         | "G0207"                                                   | 4.450232                        | 4.450232                        | -0.000000                        | 0.000000   | 3.55377711  | Down in Agi <sup>Wt</sup> -Fasted | G0207          |
| "O181n0223a"                                                         | 9.626575                                                  | 9.842484                        | 10.093246                       | 4.00292                          | "O181n0223a"                                              | 7.8176702                       | 4.040783                        | -3.7708919                       | 3.7708919  | 3.33650947  | Down in Agi <sup>Wt</sup> -Fasted | O181n0223a     |
| "G0207"                                                              | 8.8541658                                                 | 8.8541658                       | 8.8541658                       | 0.000000                         | "G0207"                                                   | 9.13456167                      | 4.5737463                       | -3.2119083                       | 3.2119083  | 11.1883321  | Down in Agi <sup>Wt</sup> -Fasted | G0207          |
| "G0207"                                                              | 10.35765                                                  | 10.35765                        | 10.35765                        | 0.000000                         | "G0207"                                                   | 10.35765                        | 10.35765                        | -0.000000                        | 0.000000   | 3.12181     | Down in Agi <sup>Wt</sup> -Fasted | G0207          |
| "Sc04m"                                                              | 12.738284                                                 | 11.02461                        | 9.3371                          | 7.662536                         | "Sc04m"                                                   | 12.73975                        | 5.29397                         | -1.649972                        | 1.649972   | 3.55121279  | Down in Agi <sup>Wt</sup> -Fasted | Sc04m          |
| "C04031"                                                             | 12.172309                                                 | 7.502706                        | 7.228671                        | 5.41821                          | "C04031"                                                  | 9.74665                         | 6.32404                         | -3.542035                        | 3.542035   | 11.6511001  | Down in Agi <sup>Wt</sup> -Fasted | C04031         |
| "G0207"                                                              | 8.02536                                                   | 8.74588                         | 6.510817                        | 4.11594                          | "G0207"                                                   | 9.54605                         | 5.161198                        | -3.474903                        | 3.474903   | 11.6873502  | Down in Agi <sup>Wt</sup> -Fasted | G0207          |
| "G0207"                                                              | 10.35765                                                  | 10.35765                        | 10.35765                        | 0.000000                         | "G0207"                                                   | 10.35765                        | 10.35765                        | -0.000000                        | 0.000000   | 3.12181     | Down in Agi <sup>Wt</sup> -Fasted | G0207          |
| "Sufu1"                                                              | 0.976686                                                  | 2.944224                        | 2.94304                         | 4.830283                         | "Sufu1"                                                   | 7.722992                        | 8.872152                        | -3.39774                         | 3.39774    | 10.5541932  | Down in Agi <sup>Wt</sup> -Fasted | Sufu1          |
| "G0207"                                                              | 7.0351345                                                 | 7.0351345                       | 7.0351345                       | 0.000000                         | "G0207"                                                   | 7.0351345                       | 7.0351345                       | -0.000000                        | 0.000000   | 3.277584825 | Down in Agi <sup>Wt</sup> -Fasted | G0207          |
| "G0207"                                                              | 1.218852                                                  | 2.002621                        | 2.002621                        | 0.000000                         | "G0207"                                                   | 1.218852                        | 2.002621                        | -0.783769                        | 0.783769   | 3.55377711  | Down in Agi <sup>Wt</sup> -Fasted | G0207          |
| "G0207"                                                              | 1.188748                                                  | 1.990485                        | 9.133205                        | 7.4456403                        | "G0207"                                                   | 1.4134875                       | 8.8984525                       | -3.3791023                       | 3.3791023  | 8.80877558  | Down in Agi <sup>Wt</sup> -Fasted | G0207          |
| "Mcp1"                                                               | 6.5099235                                                 | 5.912025                        | 7.318973                        | 2.849705                         | "Mcp1"                                                    | 6.10598235                      | 2.955423                        | -3.0297175                       | 3.0297175  | 3.5582715   | Down in Agi <sup>Wt</sup> -Fasted | Mcp1           |
| "G0207"                                                              | 1.3177                                                    | 1.3177                          | 1.3177                          | 0.000000                         | "G0207"                                                   | 1.3177                          | 1.3177                          | -0.000000                        | 0.000000   | 3.12181     | Down in Agi <sup>Wt</sup> -Fasted | G0207          |
| "Gm13502"                                                            | 11.361306                                                 | 10.64211                        | 9.293125                        | 7.1686603                        | "Gm13502"                                                 | 1.2129782                       | 8.8897775                       | -3.5987275                       | 3.5987275  | 5.8284362   | Down in Agi <sup>Wt</sup> -Fasted | Gm13502        |
| "G0207"                                                              | 9.216245                                                  | 9.216245                        | 9.216245                        | 0.000000                         | "G0207"                                                   | 9.1100685                       | 6.0624515                       | -3.0608435                       | 3.0608435  | 8.89634604  | Down in Agi <sup>Wt</sup> -Fasted | G0207          |
| "G0207"                                                              | 10.35765                                                  | 10.35765                        | 10.35765                        | 0.000000                         | "G0207"                                                   | 9.4161625                       | 10.35765                        | -0.9394875                       | 0.9394875  | 3.55377711  | Down in Agi <sup>Wt</sup> -Fasted | G0207          |
| "G0207"                                                              | 10.423216                                                 | 11.85141                        | 7.985167                        | 6.470078                         | "G0207"                                                   | 10.423216                       | 7.815513                        | -2.608617                        | 2.608617   | 7.920885136 | Down in Agi <sup>Wt</sup> -Fasted | G0207          |
| "Creid2"                                                             | 2.98448                                                   | 2.98448                         | 2.982157                        | 2.926487                         | "Creid2"                                                  | 5.7944883                       | 2.954667                        | -2.839266                        | 2.839266   | 7.1593401   | Down in Agi <sup>Wt</sup> -Fasted | Creid2         |
| "G0207"                                                              | 10.60274                                                  | 9.59234                         | 9.526063                        | 6.588125                         | "G0207"                                                   | 9.59234                         | 1.44613                         | -8.146206                        | 8.146206   | 11.8481987  | Down in Agi <sup>Wt</sup> -Fasted | G0207          |
| "G0207"                                                              | 1.781454                                                  | 2.482219                        | 2.482219                        | 0.000000                         | "G0207"                                                   | 1.781454                        | 2.482219                        | -0.698765                        | 0.698765   | 3.55377711  | Down in Agi <sup>Wt</sup> -Fasted | G0207          |
| "G0207"                                                              | 6.77395                                                   | 7.4502928                       | 4.20832                         | 4.411543                         | "G0207"                                                   | 7.1212213                       | 4.3590735                       | -2.7618451                       | 2.7618451  | 7.45064941  | Down in Agi <sup>Wt</sup> -Fasted | G0207          |
| "G0207"                                                              | 12.81567                                                  | 8.70252                         | 7.44873                         | 8.04859                          | "G0207"                                                   | 10.42681                        | 7.74884                         | -2.49912                         | 2.49912    | 4.70674653  | Down in Agi <sup>Wt</sup> -Fasted | G0207          |
| "G0207"                                                              | 7.925646                                                  | 4.47881                         | 2.439562                        | 4.47881                          | "G0207"                                                   | 7.925646                        | 4.47881                         | -3.446835                        | 3.446835   | 3.55377711  | Down in Agi <sup>Wt</sup> -Fasted | G0207          |
| "G0207"                                                              | 7.005284                                                  | 5.216364                        | 3.30003                         | 2.090477                         | "G0207"                                                   | 4.1819405                       | 2.185235                        | -2.6542151                       | 2.6542151  | 2.13165490  | Down in Agi <sup>Wt</sup> -Fasted | G0207          |
| "Nhl1"                                                               | 10.43535                                                  | 5.293634                        | 7.02825                         | 4.527297                         | "Nhl1"                                                    | 7.285935                        | 2.5649735                       | -2.5649735                       | 2.5649735  | 1.50159131  | Down in Agi <sup>Wt</sup> -Fasted | Nhl1           |
| "G0207"                                                              | 10.50881                                                  | 6.268192                        | 7.02825                         | 4.527297                         | "G0207"                                                   | 10.50881                        | 6.268192                        | -4.240688                        | 4.240688   | 3.55377711  | Down in Agi <sup>Wt</sup> -Fasted | G0207          |
| "G0207"                                                              | 6.1665075                                                 | 7.4440575                       | 3.261303                        | 6.054789                         | "G0207"</                                                 |                                 |                                 |                                  |            |             |                                   |                |

| Algt <sup>+/+</sup> vs. Algt <sup>+/+</sup> Fasted Comparison |                     |            |            |                     |            |            |                     |             |             |                     | Algt <sup>+/+</sup> vs. Algt <sup>+/+</sup> Fasted Comparison |              |                     |                             |                |                     |     |        |                     |     |         |         |          |            |                           |      |            |           |  |  |
|---------------------------------------------------------------|---------------------|------------|------------|---------------------|------------|------------|---------------------|-------------|-------------|---------------------|---------------------------------------------------------------|--------------|---------------------|-----------------------------|----------------|---------------------|-----|--------|---------------------|-----|---------|---------|----------|------------|---------------------------|------|------------|-----------|--|--|
|                                                               | Algt <sup>+/+</sup> | Fed        | Fasted     | Algt <sup>+/+</sup> | Fed        | Fasted     | Algt <sup>+/+</sup> | Fed         | Fasted      | Algt <sup>+/+</sup> | Fed                                                           | Fasted       | Algt <sup>+/+</sup> | Fed                         | Fasted         | Algt <sup>+/+</sup> | Fed | Fasted | Algt <sup>+/+</sup> | Fed | Average | Average | Abs(Off) | 2*Abs(Off) | Regulation is based on FC | FC-3 | Regulation | Gene List |  |  |
| Cat1                                                          | 12.84766            | 12.74656   | 9.2213475  | 4.88755             | 4.88755    | 4.88755    | Cat1                | 12.815561   | 7.204702    | 5.610708            | 5.610708                                                      | 5.610708     | 48.8670738          | Down in Algt <sup>+/+</sup> | FastedCat1     |                     |     |        |                     |     |         |         |          |            |                           |      |            |           |  |  |
| Cat2                                                          | 10.23777            | 10.23777   | 5.418231   | 4.8231              | 4.8231     | 4.8231     | Cat2                | 10.3287955  | 5.324034    | 4.0027155           | 4.0027155                                                     | 4.0027155    | 10.0301442          | Down in Algt <sup>+/+</sup> | FastedCat2     |                     |     |        |                     |     |         |         |          |            |                           |      |            |           |  |  |
| Hsd17b6                                                       | 11.59161            | 10.35854   | 9.008382   | 4.287185            | 4.287185   | 4.287185   | Hsd17b6             | 10.9750875  | 7.07255075  | -1.90253675         | -1.90253675                                                   | -1.90253675  | 14.9548004          | Down in Algt <sup>+/+</sup> | FastedHsd17b6  |                     |     |        |                     |     |         |         |          |            |                           |      |            |           |  |  |
| Hm13502                                                       | 11.15092            | 11.865485  | 9.291525   | 1.718660            | 1.718660   | 1.718660   | Hm13502             | 11.5087625  | 8.19898775  | -3.30977475         | -3.30977475                                                   | -3.30977475  | 9.91631992          | Down in Algt <sup>+/+</sup> | FastedHm13502  |                     |     |        |                     |     |         |         |          |            |                           |      |            |           |  |  |
| Hsd18b2                                                       | 4.64592             | 6.369818   | 2.717784   | 1.723896            | 1.723896   | 1.723896   | Hsd18b2             | 5.5076528   | 2.0041758   | -3.503477           | -3.503477                                                     | -3.503477    | 8.87281198          | Down in Algt <sup>+/+</sup> | FastedHsd18b2  |                     |     |        |                     |     |         |         |          |            |                           |      |            |           |  |  |
| Gbp1                                                          | 6.455340            | 5.3906736  | 3.552608   | 2.1268349           | 2.1268349  | 2.1268349  | Gbp1                | 5.9233009   | 2.8972145   | -3.0855845          | -3.0855845                                                    | -3.0855845   | 8.47718604          | Down in Algt <sup>+/+</sup> | FastedGbp1     |                     |     |        |                     |     |         |         |          |            |                           |      |            |           |  |  |
| Nsdh1                                                         | 8.749759            | 10.138479  | 7.2371997  | 5.599473            | 5.599473   | 5.599473   | Nsdh1               | 9.534119    | 6.6883635   | -3.06578265         | -3.06578265                                                   | -3.06578265  | 8.37220689          | Down in Algt <sup>+/+</sup> | FastedNsdh1    |                     |     |        |                     |     |         |         |          |            |                           |      |            |           |  |  |
| Sdg                                                           | 7.688492            | 9.201856   | 6.502425   | 4.406794            | 4.406794   | 4.406794   | Sdg                 | 8.43317415  | 4.5502425   | -2.98015085         | -2.98015085                                                   | -2.98015085  | 7.80686559          | Down in Algt <sup>+/+</sup> | FastedSdg      |                     |     |        |                     |     |         |         |          |            |                           |      |            |           |  |  |
| Scdm1                                                         | 10.873824           | 12.126097  | 9.889731   | 7.6262036           | 7.6262036  | 7.6262036  | Scdm1               | 11.5004665  | 8.5295973   | -2.9708692          | -2.9708692                                                    | -2.9708692   | 7.82016478          | Down in Algt <sup>+/+</sup> | FastedScdm1    |                     |     |        |                     |     |         |         |          |            |                           |      |            |           |  |  |
| Sc22a7                                                        | 7.479745            | 8.829427   | 4.987055   | 5.819506            | 5.819506   | 5.819506   | Sc22a7              | 8.15461075  | 5.15458085  | -2.9701027          | -2.9701027                                                    | -2.9701027   | 7.83592017          | Down in Algt <sup>+/+</sup> | FastedSc22a7   |                     |     |        |                     |     |         |         |          |            |                           |      |            |           |  |  |
| Gtbp6                                                         | 9.124038            | 8.107361   | 6.119303   | 5.5013945           | 5.5013945  | 5.5013945  | Gtbp6               | 8.6156995   | 5.70264875  | -2.91305075         | -2.91305075                                                   | -2.91305075  | 7.53209267          | Down in Algt <sup>+/+</sup> | FastedGtbp6    |                     |     |        |                     |     |         |         |          |            |                           |      |            |           |  |  |
| Serpinb6                                                      | 11.021734           | 11.85942   | 8.632901   | 7.105135            | 7.105135   | 7.105135   | Serpinb6            | 11.102728   | 8.2622085   | -2.8405095          | -2.8405095                                                    | -2.8405095   | 7.18540512          | Down in Algt <sup>+/+</sup> | FastedSerpinb6 |                     |     |        |                     |     |         |         |          |            |                           |      |            |           |  |  |
| Gamt                                                          | 10.464962           | 10.56817   | 9.921185   | 5.50666             | 5.50666    | 5.50666    | Gamt                | 10.5167985  | 7.7124255   | -2.804364           | -2.804364                                                     | -2.804364    | 6.98550288          | Down in Algt <sup>+/+</sup> | FastedGamt     |                     |     |        |                     |     |         |         |          |            |                           |      |            |           |  |  |
| Krt19                                                         | 7.3170047           | 5.461295   | 4.415157   | 2.925702            | 2.925702   | 2.925702   | Krt19               | 6.8914985   | 3.6704426   | -2.71870625         | -2.71870625                                                   | -2.71870625  | 6.582287108         | Down in Algt <sup>+/+</sup> | FastedKrt19    |                     |     |        |                     |     |         |         |          |            |                           |      |            |           |  |  |
| Sret1                                                         | 10.847291           | 10.51187   | 9.020289   | 7.1327786           | 7.1327786  | 7.1327786  | Sret1               | 10.88034    | 8.1977738   | -2.682662           | -2.682662                                                     | -2.682662    | 6.420146419         | Down in Algt <sup>+/+</sup> | FastedSret1    |                     |     |        |                     |     |         |         |          |            |                           |      |            |           |  |  |
| Tord4a4                                                       | 9.372782            | 8.546087   | 6.9361961  | 5.839647            | 5.839647   | 5.839647   | Tord4a4             | 9.0619795   | 6.1879218   | -2.6749577          | -2.6749577                                                    | -2.6749577   | 6.182217168         | Down in Algt <sup>+/+</sup> | FastedTord4a4  |                     |     |        |                     |     |         |         |          |            |                           |      |            |           |  |  |
| Hsd3b3                                                        | 9.588789            | 10.247361  | 8.396488   | 6.112998            | 6.112998   | 6.112998   | Hsd3b3              | 9.918176    | 7.254743    | -2.663433           | -2.663433                                                     | -2.663433    | 6.33518809          | Down in Algt <sup>+/+</sup> | FastedHsd3b3   |                     |     |        |                     |     |         |         |          |            |                           |      |            |           |  |  |
| Cyp51                                                         | 7.388860167         | 8.79382133 | 5.94829343 | 4.99843967          | 4.99843967 | 4.99843967 | Cyp51               | 8.05135615  | 5.47337645  | -2.5779797          | -2.5779797                                                    | -2.5779797   | 5.97029513          | Down in Algt <sup>+/+</sup> | FastedCyp51    |                     |     |        |                     |     |         |         |          |            |                           |      |            |           |  |  |
| Cyp2b9                                                        | 10.840955           | 8.85548    | 10.30923   | 4.202215            | 4.202215   | 4.202215   | Cyp2b9              | 9.8512159   | 7.35661025  | -2.54469575         | -2.54469575                                                   | -2.54469575  | 5.83420022          | Down in Algt <sup>+/+</sup> | FastedCyp2b9   |                     |     |        |                     |     |         |         |          |            |                           |      |            |           |  |  |
| Cen2c                                                         | 7.696259            | 9.25213    | 7.158348   | 5.6867024           | 5.6867024  | 5.6867024  | Cen2c               | 8.9741945   | 6.4425702   | -2.5316243          | -2.5316243                                                    | -2.5316243   | 5.92222302          | Down in Algt <sup>+/+</sup> | FastedCen2c    |                     |     |        |                     |     |         |         |          |            |                           |      |            |           |  |  |
| Cela1                                                         | 9.50247             | 9.406569   | 7.268589   | 6.9721514           | 6.9721514  | 6.9721514  | Cela1               | 9.4543195   | 7.0695052   | -2.3848143          | -2.3848143                                                    | -2.3848143   | 5.22276844          | Down in Algt <sup>+/+</sup> | FastedCela1    |                     |     |        |                     |     |         |         |          |            |                           |      |            |           |  |  |
| Fdft1                                                         | 10.164258           | 11.77521   | 9.1325075  | 7.4545403           | 7.4545403  | 7.4545403  | Fdft1               | 10.67188975 | 8.28944525  | -2.38244425         | -2.38244425                                                   | -2.38244425  | 5.21419387          | Down in Algt <sup>+/+</sup> | FastedFdft1    |                     |     |        |                     |     |         |         |          |            |                           |      |            |           |  |  |
| Cmt1                                                          | 10.1314355          | 11.33586   | 8.754491   | 7.620206            | 7.620206   | 7.620206   | Cmt1                | 10.7356475  | 8.5517483   | -2.3839165          | -2.3839165                                                    | -2.3839165   | 5.21226752          | Down in Algt <sup>+/+</sup> | FastedCmt1     |                     |     |        |                     |     |         |         |          |            |                           |      |            |           |  |  |
| Tlcl2                                                         | 10.796481           | 10.420025  | 8.509327   | 7.9812374           | 7.9812374  | 7.9812374  | Tlcl2               | 10.6082576  | 8.2452822   | -2.36297455         | -2.36297455                                                   | -2.36297455  | 5.144399184         | Down in Algt <sup>+/+</sup> | FastedTlcl2    |                     |     |        |                     |     |         |         |          |            |                           |      |            |           |  |  |
| Hsd3b2                                                        | 7.380887            | 8.393658   | 6.345268   | 4.7231705           | 4.7231705  | 4.7231705  | Hsd3b2              | 7.88718725  | 5.53422525  | -2.352964725        | -2.352964725                                                  | -2.352964725 | 5.108780233         | Down in Algt <sup>+/+</sup> | FastedHsd3b2   |                     |     |        |                     |     |         |         |          |            |                           |      |            |           |  |  |
| Cttna1                                                        | 6.0501485           | 10.458386  | 9.2222634  | 7.218652            | 7.218652   | 7.218652   | Cttna1              | 10.55466625 | 8.217633    | -2.33636325         | -2.33636325                                                   | -2.33636325  | 5.05123488          | Down in Algt <sup>+/+</sup> | FastedCttna1   |                     |     |        |                     |     |         |         |          |            |                           |      |            |           |  |  |
| Cttnb1                                                        | 9.08851331          | 9.44330267 | 8.84781661 | 6.20340833          | 6.20340833 | 6.20340833 | Cttnb1              | 7.7564125   | 5.81093625  | -2.30096325         | -2.30096325                                                   | -2.30096325  | 4.92717743          | Down in Algt <sup>+/+</sup> | FastedCttnb1   |                     |     |        |                     |     |         |         |          |            |                           |      |            |           |  |  |
| Abca1a                                                        | 10.289885           | 11.250992  | 8.899946   | 7.9407387           | 7.9407387  | 7.9407387  | Abca1a              | 10.7704835  | 8.4704235   | -2.3009615          | -2.3009615                                                    | -2.3009615   | 4.92405868          | Down in Algt <sup>+/+</sup> | FastedAbca1a   |                     |     |        |                     |     |         |         |          |            |                           |      |            |           |  |  |
| Cyp2b11                                                       | 10.785951           | 4.866705   | 7.986402   | 2.1029236           | 2.1029236  | 2.1029236  | Cyp2b11             | 7.5374808   | 5.1066445   | -2.2708225          | -2.2708225                                                    | -2.2708225   | 4.821981183         | Down in Algt <sup>+/+</sup> | FastedCyp2b11  |                     |     |        |                     |     |         |         |          |            |                           |      |            |           |  |  |
| Hmgcs1                                                        | 12.1488181          | 12.131148  | 10.1870125 | 9.4844781           | 9.4844781  | 9.4844781  | Hmgcs1              | 12.15603171 | 9.240941788 | -2.915089923        | -2.915089923                                                  | -2.915089923 | 8.21271878          | Down in Algt <sup>+/+</sup> | FastedHmgcs1   |                     |     |        |                     |     |         |         |          |            |                           |      |            |           |  |  |
| Cuc9                                                          | 6.460773            | 9.11528    | 8.02389    | 6.262797            | 6.262797   | 6.262797   | Cuc9                | 9.3797975   | 7.143245    | -2.236531           | -2.236531                                                     | -2.236531    | 4.71263197          | Down in Algt <sup>+/+</sup> | FastedCuc9     |                     |     |        |                     |     |         |         |          |            |                           |      |            |           |  |  |
| Ohcr7                                                         | 8.873922            | 9.387491   | 7.259748   | 6.530999            | 6.530999   | 6.530999   | Ohcr7               | 9.1307005   | 6.9127735   | -2.218333           | -2.218333                                                     | -2.218333    | 4.65354166          | Down in Algt <sup>+/+</sup> | FastedOhcr7    |                     |     |        |                     |     |         |         |          |            |                           |      |            |           |  |  |
| Sc22a8                                                        | 10.557918           | 11.16856   | 8.791512   | 6.291512            | 6.291512   | 6.291512   | Sc22a8              | 10.847487   | 8.1979785   | -2.6495085          | -2.6495085                                                    | -2.6495085   | 4.61893842          | Down in Algt <sup>+/+</sup> | FastedSc22a8   |                     |     |        |                     |     |         |         |          |            |                           |      |            |           |  |  |
| Agp1                                                          | 10.384905           | 9.36084    | 9.077402   | 6.354786            | 6.354786   | 6.354786   | Agp1                | 9.8776995   | 7.7160403   | -2.1616592          | -2.1616592                                                    | -2.1616592   | 4.47418802          | Down in Algt <sup>+/+</sup> | FastedAgp1     |                     |     |        |                     |     |         |         |          |            |                           |      |            |           |  |  |
| Lgr5                                                          | 5.137489            | 4.678511   | 2.673518   | 2.871145            | 2.871145   | 2.871145   | Lgr5                | 4.90797535  | 2.7543505   | -2.1536233          | -2.1536233                                                    | -2.1536233   | 4.449466301         | Down in Algt <sup>+/+</sup> | FastedLgr5     |                     |     |        |                     |     |         |         |          |            |                           |      |            |           |  |  |
| Suncr1                                                        | 8.577906            | 7.7809553  | 6.16983    | 5.504975            | 5.504975   | 5.504975   | Suncr1              | 8.1794065   | 6.0624025   | -2.11702815         | -2.11702815                                                   | -2.11702815  | 4.337994278         | Down in Algt <sup>+/+</sup> | FastedSuncr1   |                     |     |        |                     |     |         |         |          |            |                           |      |            |           |  |  |
| Aox2                                                          | 11.0434061          | 11.135223  | 8.542479   | 7.855554            | 7.855554   | 7.855554   | Aox2                | 10.5244138  | 8.1024763   | -2.4219375          | -2.4219375                                                    | -2.4219375   | 4.32721208          | Down in Algt <sup>+/+</sup> | FastedAox2     |                     |     |        |                     |     |         |         |          |            |                           |      |            |           |  |  |
| Star4                                                         | 7.700536            | 9.36744    | 7.138205   | 5.80028845          | 5.80028845 | 5.80028845 | Star4               | 8.5340468   | 6.47064945  | -2.06339725         | -2.06339725                                                   | -2.06339725  | 4.179694            | Down in Algt <sup>+/+</sup> | FastedStar4    |                     |     |        |                     |     |         |         |          |            |                           |      |            |           |  |  |
| Elovl3                                                        | 4.272320            | 5.652359   | 3.055855   | 2.775356            | 2.775356   | 2.775356   | Elovl3              | 4.9623385   | 2.9156955   | -2.0466443          | -2.0466443                                                    | -2.0466443   | 4.131438809         | Down in Algt <sup>+/+</sup> | FastedElovl3   |                     |     |        |                     |     |         |         |          |            |                           |      |            |           |  |  |
| Hsd3b1                                                        | 6.535847            | 2.404392   | 2.444388   | 2.487952            | 2.487952   | 2.487952   | Hsd3b1              | 4.4820031   | 2.444998    | -2.0473051          | -2.0473051                                                    | -2.0473051   | 4.13177225          | Down in Algt <sup>+/+</sup> | FastedHsd3b1   |                     |     |        |                     |     |         |         |          |            |                           |      |            |           |  |  |
| Hsd3b2                                                        | 5.1304135           | 6.519473   | 2.8513123  | 2.9433796           | 2.9433796  | 2.9433796  | Hsd3b2              | 4.84847315  | 2.7985544   | -2.08661675         | -2.08661675                                                   | -2.08661675  | 4.07418802          | Down in Algt <sup>+/+</sup> | FastedHsd3b2   |                     |     |        |                     |     |         |         |          |            |                           |      |            |           |  |  |
| Gatm                                                          | 8.2415              | 7.278049   | 6.783326   | 5.048049            | 5.048049   | 5.048049   | Gatm                | 7.9510955   | 5.9208785   | -2.030412           | -2.030412                                                     | -2.030412    | 4.083214978         | Down in Algt <sup>+/+</sup> | FastedGatm     |                     |     |        |                     |     |         |         |          |            |                           |      |            |           |  |  |
| Lect1                                                         | 5.482096            | 8.054054   | 5.103948   | 4.401323            | 4.401323   | 4.401323   | Lect1               | 6.780075    | 4.7329838   | -2.0515192          | -2.0515192                                                    | -2.0515192   | 4.042195783         | Down in Algt <sup>+/+</sup> | FastedLect1    |                     |     |        |                     |     |         |         |          |            |                           |      |            |           |  |  |
| Sult1c2                                                       | 5.956781            | 6.0386195  | 4.715458   | 3.2946909           | 3.2946909  | 3.2946909  | Sult1c2             | 5.991797185 | 3.10270968  | -2.0205077          | -2.0205077                                                    | -2.0205077   | 3.92783932          | Down in Algt <sup>+/+</sup> | FastedSult1c2  |                     |     |        |                     |     |         |         |          |            |                           |      |            |           |  |  |
| Ogln1                                                         | 10.024059           | 9.900971   | 8.547182   | 7.375006            | 7.375006   | 7.375006   | Ogln1               | 9.96274     | 7.961594    | -2.001146           | -2.001146                                                     | -2.001146    | 4.004566285         | Down in Algt <sup>+/+</sup> | FastedOgln1    |                     |     |        |                     |     |         |         |          |            |                           |      |            |           |  |  |
| Gstm6                                                         | 6.892409            | 7.4791527  | 5.644889   | 4.764362            | 4.764362   | 4.764362   | Gstm6               | 7.18578085  | 5.2042466   | -1.9815425          | -1.9815425                                                    | -1.9815425   | 3.94808282          | Down in Algt <sup>+/+</sup> | FastedGstm6    |                     |     |        |                     |     |         |         |          |            |                           |      |            |           |  |  |
| Hsd3b5                                                        | 2.269775            | 6.297445   | 3.266088   | 2.265775            | 2.265775   | 2.265775   | Hsd3b5              | 4.229561    | 2.2414415   | -1.9781278          | -1.9781278                                                    | -1.9781278   | 3.94060684          | Down in Algt <sup>+/+</sup> | FastedHsd3b5   |                     |     |        |                     |     |         |         |          |            |                           |      |            |           |  |  |
| Hsd3b6                                                        | 10.16118            | 8.1094315  | 6.266191   | 4.940761            | 4.940761   | 4.940761   | Hsd3b6              | 9.99703175  | 7.97762815  | -1.97762815         | -1.97762815                                                   | -1.97762815  | 3.936802189         | Down in Algt <sup>+/+</sup> | FastedHsd3b6   |                     |     |        |                     |     |         |         |          |            |                           |      |            |           |  |  |
| Innm                                                          | 13.35399            | 13.261481  | 12.466101  | 10.241861           | 10.241861  | 10.241861  | Innm                | 13.30844    | 11.355676   | -1.952764           | -1.952764                                                     | -1.952764    | 3.871154802         | Down in Algt <sup>+/+</sup> | FastedInnm     |                     |     |        |                     |     |         |         |          |            |                           |      |            |           |  |  |
| Lgals1                                                        | 8.278471            | 7.812595   | 6.8801135  | 5.1373895           | 5.1373895  | 5.1373895  | Lgals1              | 8.05571375  | 6.12613015  | -1.9295836          | -1.9295836                                                    | -1.9295836   | 3.809423235         | Down in Algt <sup>+/+</sup> | FastedLgals1   |                     |     |        |                     |     |         |         |          |            |                           |      |            |           |  |  |
| Cyp2a1                                                        | 12.02444            | 12.38048   | 11.209246  | 4.48842             | 4.48842    | 4.48842    | Cyp2a1              | 12.28694    | 8.328723    | -3.9602761          | -3.9602761                                                    | -3.9602761   | 3.75202905          | Down in Algt <sup>+/+</sup> | FastedCyp2a1   |                     |     |        |                     |     |         |         |          |            |                           |      |            |           |  |  |
| H2-A4                                                         | 9.580124            | 8.8441085  | 6.9607325  | 5.944654            | 5.944654   | 5.944654   | H2-A4               | 9.34862415  | 7.40878625  | -1.9788819          | -1.9788819                                                    | -1.9788819   | 3.68044935          | Down in Algt <sup>+/+</sup> | FastedH2-A4    |                     |     |        |                     |     |         |         |          |            |                           |      |            |           |  |  |
| H2-A2                                                         | 11.941361           | 11.88034   | 11.00796   | 8.315395            | 8.315395   | 8.315395   | H2-A2               | 11.5848475  | 9.616055    | -1.9721927          | -1.9721927                                                    | -1.9721927   | 3.60896634          | Down in Algt <sup>+/+</sup> | FastedH2-A2    |                     |     |        |                     |     |         |         |          |            |                           |      |            |           |  |  |
| Abca1a                                                        | 6.5722735           | 6.142272   | 5.1884925  | 3.7615051           | 3.7615051  | 3.7615051  | Abca1a              | 6.34622775  | 4.4749865   | -1.87123075         | -1.87123075                                                   | -1.87123075  | 3.65845523          | Down in Algt <sup>+/+</sup> | FastedAbca1a   |                     |     |        |                     |     |         |         |          |            |                           |      |            |           |  |  |
| Gadd45a                                                       | 6.652736            | 6.652736   | 4.882587   | 3.7558736           | 3.7558736  | 3.7558736  | Gadd45a             | 6.820527    | 4.7558736   | -2.0646534          | -2.0646534                                                    | -2.0646534   | 3.544985254         | Down in Algt <sup>+/+</sup> | FastedGadd45a  |                     |     |        |                     |     |         |         |          |            |                           |      |            |           |  |  |
| Gstm3                                                         | 5.8241325           | 5.276243   | 4.710911   | 2.8007428           | 2.8007428  | 2.800742   |                     |             |             |                     |                                                               |              |                     |                             |                |                     |     |        |                     |     |         |         |          |            |                           |      |            |           |  |  |

| Atq7 <sup>+/+</sup> -Fasted<br>vs.<br>Atq <sup>+/+</sup> -Fed<br>Comparison | Average                    |                            |                            |                         |                         | Atq7 <sup>+/+</sup> -Fasted<br>vs.<br>Atq <sup>+/+</sup> -Fed<br>Comparison | Average                    |                            |             |             |                            | Regulation is based on FFC-3 |
|-----------------------------------------------------------------------------|----------------------------|----------------------------|----------------------------|-------------------------|-------------------------|-----------------------------------------------------------------------------|----------------------------|----------------------------|-------------|-------------|----------------------------|------------------------------|
|                                                                             | Atq <sup>+/+</sup> -Fasted | Atq <sup>+/+</sup> -Fasted | Atq <sup>+/+</sup> -Fasted | Atq <sup>+/+</sup> -Fed | Atq <sup>+/+</sup> -Fed |                                                                             | Atq <sup>+/+</sup> -Fasted | Atq <sup>+/+</sup> -Fasted | Diff        | Abs(Diff)   | 2*Abs(Diff)                |                              |
| "Car3"                                                                      | 4.3422291                  | 7.2460488                  | 10.214902                  | 12.3632425              | "Car3"                  | 5.79413895                                                                  | 11.28930813                | -5.495169175               | 5.495169175 | 45.10355248 | Down in Atq <sup>+/+</sup> | Car3                         |
| "Sult2a2"                                                                   | 3.4963372                  | 2.6125965                  | 10.085199                  | 6.071286                | "Sult2a2"               | 3.05446683                                                                  | 8.0782425                  | -5.02377565                | 5.02377565  | 32.53173022 | Down in Atq <sup>+/+</sup> | Sult2a2                      |
| "Ecl3"                                                                      | 4.6707296                  | 2.5483716                  | 8.141632                   | 4.850512                | "Ecl3"                  | 3.6920556                                                                   | 8.299072                   | -4.6895214                 | 4.6895214   | 25.80397466 | Down in Atq <sup>+/+</sup> | Ecl3                         |
| "Wisp2"                                                                     | 2.257579                   | 2.228938                   | 7.281181                   | 5.95205                 | "Wisp2"                 | 2.2421314                                                                   | 6.616608                   | -4.3742766                 | 4.3742766   | 20.7993211  | Down in Atq <sup>+/+</sup> | Wisp2                        |
| "Cyp3a41a"                                                                  | 11.365711                  | 7.78523                    | 13.736443                  | 14.064572               | "Cyp3a41a"              | 9.5745705                                                                   | 13.9005075                 | -4.325307                  | 4.325307    | 20.04314505 | Down in Atq <sup>+/+</sup> | Cyp3a41a                     |
| "Hfl1"                                                                      | 6.3102684                  | 6.469082                   | 10.380644                  | 9.095954                | "Hfl1"                  | 6.3896752                                                                   | 10.143304                  | -3.7536288                 | 3.7536288   | 13.48827268 | Down in Atq <sup>+/+</sup> | Hfl1                         |
| "Ly6a"                                                                      | 9.48314                    | 8.06904                    | 12.739229                  | 11.949841               | "Ly6a"                  | 8.77609                                                                     | 12.344535                  | -3.568445                  | 3.568445    | 11.86339478 | Down in Atq <sup>+/+</sup> | Ly6a                         |
| "Cbp6"                                                                      | 6.4635416                  | 5.469593                   | 9.302697                   | 4.24036                 | "Cbp6"                  | 5.96880045                                                                  | 9.363665                   | -3.3956605                 | 3.3956605   | 10.53096728 | Down in Atq <sup>+/+</sup> | Cbp6                         |
| "Cyp2b13"                                                                   | 2.003807                   | 2.926696                   | 5.640281                   | 6.052013                | "Cyp2b13"               | 2.4622883                                                                   | 5.8461515                  | -3.3838632                 | 3.3838632   | 10.43879228 | Down in Atq <sup>+/+</sup> | Cyp2b13                      |
| "Aag8"                                                                      | 7.6521144                  | 7.295027                   | 11.133145                  | 10.393784               | "Aag8"                  | 7.4738085                                                                   | 10.76346275                | -3.2896542                 | 3.2896542   | 9.77878062  | Down in Atq <sup>+/+</sup> | Aag8                         |
| "Krt79"                                                                     | 4.8805504                  | 3.4434233                  | 8.502388                   | 6.113027                | "Krt79"                 | 4.6198685                                                                   | 7.3077075                  | -2.687839                  | 2.687839    | 8.50264976  | Down in Atq <sup>+/+</sup> | Krt79                        |
| "Tlr2"                                                                      | 7.0224353                  | 4.4437566                  | 8.89615                    | 8.78078                 | "Tlr2"                  | 5.7313895                                                                   | 8.8717975                  | -3.14041035                | 3.14041035  | 8.598597417 | Down in Atq <sup>+/+</sup> | Tlr2                         |
| "Uld1"                                                                      | 3.0972033                  | 4.12897                    | 6.265971                   | 7.125744                | "Uld1"                  | 3.61308665                                                                  | 6.695875                   | -3.08277085                | 3.08277085  | 8.47240086  | Down in Atq <sup>+/+</sup> | Uld1                         |
| "Hla4"                                                                      | 3.869291                   | 2.965294                   | 9.072018                   | 6.235703                | "Hla4"                  | 4.1357252                                                                   | 7.1538262                  | -3.01813695                | 3.01813695  | 8.101207442 | Down in Atq <sup>+/+</sup> | Hla4                         |
| "Abcd2"                                                                     | 5.0674086                  | 3.8543777                  | 7.8215275                  | 7.1107504               | "Abcd2"                 | 4.46097315                                                                  | 7.46611645                 | -3.0051433                 | 3.0051433   | 8.02857141  | Down in Atq <sup>+/+</sup> | Abcd2                        |
| "Serpin6"                                                                   | 7.9351163                  | 7.172356                   | 8.950583                   | 11.242569               | "Serpin6"               | 7.55373615                                                                  | 10.546576                  | -2.9928395                 | 2.9928395   | 7.960394062 | Down in Atq <sup>+/+</sup> | Serpin6                      |
| "Gbp1"                                                                      | 2.3189705                  | 2.0981746                  | 6.089142                   | 4.250651                | "Gbp1"                  | 2.20854105                                                                  | 5.1689805                  | -2.96135545                | 2.96135545  | 7.78853694  | Down in Atq <sup>+/+</sup> | Gbp1                         |
| "Cyp2b9"                                                                    | 7.4391046                  | 5.69536                    | 9.039368                   | 9.979774                | "Cyp2b9"                | 6.5678203                                                                   | 9.509571                   | -2.9417507                 | 2.9417507   | 7.683411088 | Down in Atq <sup>+/+</sup> | Cyp2b9                       |
| "Pnk1"                                                                      | 2.845454                   | 2.461043                   | 5.88689                    | 5.702492                | "Pnk1"                  | 3.00187213                                                                  | 5.8389007                  | -2.8370275                 | 2.8370275   | 7.149377098 | Down in Atq <sup>+/+</sup> | Pnk1                         |
| "Zbp1"                                                                      | 5.2569518                  | 4.7259953                  | 8.6143385                  | 6.949901                | "Zbp1"                  | 4.991475475                                                                 | 7.782109925                | -2.79063445                | 2.79063445  | 6.91934008  | Down in Atq <sup>+/+</sup> | Zbp1                         |
| "Gstm3"                                                                     | 7.0347883                  | 7.03560235                 | 11.088466                  | 8.537801                | "Gstm3"                 | 7.035195325                                                                 | 11.8813335                 | -2.777938175               | 2.777938175 | 6.858714365 | Down in Atq <sup>+/+</sup> | Gstm3                        |
| "Tlcl2"                                                                     | 7.282476                   | 7.676787                   | 10.305197                  | 10.208662               | "Tlcl2"                 | 7.4796315                                                                   | 10.2562995                 | -2.777298                  | 2.777298    | 6.855671585 | Down in Atq <sup>+/+</sup> | Tlcl2                        |
| "Sic22a2"                                                                   | 2.7354717                  | 5.16658                    | 4.9456068                  | 4.883089                | "Sic22a2"               | 3.95102585                                                                  | 6.7147478                  | -2.76334895                | 2.76334895  | 6.789705246 | Down in Atq <sup>+/+</sup> | Sic22a2                      |
| "Ly6l1"                                                                     | 6.423827                   | 6.638027                   | 8.782175                   | 8.971407                | "Ly6l1"                 | 6.4242402                                                                   | 9.601742                   | -3.1795443                 | 3.1795443   | 7.75944027  | Down in Atq <sup>+/+</sup> | Ly6l1                        |
| "Adamc1c1"                                                                  | 7.3432508                  | 4.446443                   | 8.958674                   | 8.343436                | "Adamc1c1"              | 5.8948469                                                                   | 8.651055                   | -2.7562081                 | 2.7562081   | 6.765818567 | Down in Atq <sup>+/+</sup> | Adamc1c1                     |
| "Gbp2"                                                                      | 8.2237732                  | 5.72781635                 | 10.267135                  | 9.150463                | "Gbp2"                  | 6.97576775                                                                  | 9.70858725                 | -2.732810475               | 2.732810475 | 6.647493563 | Down in Atq <sup>+/+</sup> | Gbp2                         |
| "Ly6d1"                                                                     | 6.479546                   | 7.3053174                  | 10.974933                  | 8.274952                | "Ly6d1"                 | 6.8924317                                                                   | 9.6249425                  | -2.7325108                 | 2.7325108   | 6.646112896 | Down in Atq <sup>+/+</sup> | Ly6d1                        |
| "Nfe2"                                                                      | 2.0070367                  | 1.9687781                  | 7.3668003                  | 1.958101                | "Nfe2"                  | 1.9879074                                                                   | 4.6613052                  | -2.6733978                 | 2.6733978   | 6.79298559  | Down in Atq <sup>+/+</sup> | Nfe2                         |
| "Gbp8"                                                                      | 7.867787                   | 5.293909                   | 9.4671459                  | 9.393939                | "Gbp8"                  | 7.3903393                                                                   | 9.8652649                  | -2.4682116                 | 2.4682116   | 6.356422768 | Down in Atq <sup>+/+</sup> | Gbp8                         |
| "Cyp2g1"                                                                    | 2.961825                   | 3.185047                   | 5.582792                   | 5.836580                | "Cyp2g1"                | 3.0736485                                                                   | 5.7096855                  | -2.6360217                 | 2.6360217   | 6.261515649 | Down in Atq <sup>+/+</sup> | Cyp2g1                       |
| "Aldh1b1"                                                                   | 6.36854                    | 5.637181                   | 9.677121                   | 7.526752                | "Aldh1b1"               | 5.9979175                                                                   | 8.601991                   | -2.6040216                 | 2.6040216   | 6.079905493 | Down in Atq <sup>+/+</sup> | Aldh1b1                      |
| "H1b"                                                                       | 5.6003375                  | 4.7008944                  | 8.38883                    | 7.068824                | "H1b"                   | 5.15061595                                                                  | 7.728827                   | -2.5782105                 | 2.5782105   | 5.971987104 | Down in Atq <sup>+/+</sup> | H1b                          |
| "Hsd3b3"                                                                    | 5.9152957                  | 7.4355817                  | 8.876171                   | 8.577626                | "Hsd3b3"                | 6.674387                                                                    | 9.2268985                  | -2.5524598                 | 2.5524598   | 5.86633638  | Down in Atq <sup>+/+</sup> | Hsd3b3                       |
| "Sult1a2"                                                                   | 3.689294                   | 2.816222                   | 4.486275                   | 5.484265                | "Sult1a2"               | 3.4244721                                                                   | 5.9313925                  | -2.5069204                 | 2.5069204   | 5.718733728 | Down in Atq <sup>+/+</sup> | Sult1a2                      |
| "Rasd2"                                                                     | 3.879007                   | 6.547711767                | 10.84010967                | 9.019651                | "Rasd2"                 | 7.463353383                                                                 | 9.92880333                 | -2.46552095                | 2.46552095  | 5.527093238 | Down in Atq <sup>+/+</sup> | Rasd2                        |
| "Gstm4"                                                                     | 5.897996                   | 8.0624                     | 10.206584                  | 8.674903                | "Gstm4"                 | 6.980198                                                                    | 9.4407435                  | -2.4605455                 | 2.4605455   | 5.5042481   | Down in Atq <sup>+/+</sup> | Gstm4                        |
| "Osl2"                                                                      | 4.1710825                  | 2.5262144                  | 6.108594                   | 5.493502                | "Osl2"                  | 3.34864885                                                                  | 5.801948                   | -2.45329955                | 2.45329955  | 5.476672268 | Down in Atq <sup>+/+</sup> | Osl2                         |
| "Pphn1"                                                                     | 4.85143625                 | 3.8989855                  | 7.1771795                  | 6.3571798               | "Pphn1"                 | 4.34306614                                                                  | 6.765449825                | -2.424788425               | 2.424788425 | 5.408053045 | Down in Atq <sup>+/+</sup> | Pphn1                        |
| "Lg1"                                                                       | 8.147625                   | 7.0105617                  | 11.238619                  | 8.213427                | "Lg1"                   | 7.58685021                                                                  | 10.01136                   | -2.42515175                | 2.42515175  | 5.384848928 | Down in Atq <sup>+/+</sup> | Lg1                          |
| "Hsg2"                                                                      | 3.6168113                  | 3.1348704                  | 6.452099                   | 5.110455                | "Hsg2"                  | 3.37584535                                                                  | 5.781322                   | -2.40547665                | 2.40547665  | 5.298105786 | Down in Atq <sup>+/+</sup> | Hsg2                         |
| "Cxc10"                                                                     | 9.862221                   | 4.7752843                  | 9.224445                   | 10.176828               | "Cxc10"                 | 7.31875265                                                                  | 9.7006365                  | -2.38188385                | 2.38188385  | 5.212186798 | Down in Atq <sup>+/+</sup> | Cxc10                        |
| "Cxc11"                                                                     | 12.1273669                 | 7.560706                   | 12.09601                   | 12.396469               | "Cxc11"                 | 9.8665373                                                                   | 12.246685                  | -2.3801475                 | 2.3801475   | 5.205899642 | Down in Atq <sup>+/+</sup> | Cxc11                        |
| "Leap2"                                                                     | 5.217778                   | 8.437862                   | 9.045024                   | 9.33431                 | "Leap2"                 | 6.82782                                                                     | 9.19217                    | -2.371397                  | 2.371397    | 5.174419422 | Down in Atq <sup>+/+</sup> | Leap2                        |
| "Gbp3"                                                                      | 4.349025                   | 4.349025                   | 6.36484                    | 6.36484                 | "Gbp3"                  | 4.349025                                                                    | 6.36484                    | -2.0158195                 | 2.0158195   | 5.165687268 | Down in Atq <sup>+/+</sup> | Gbp3                         |
| "Dbp"                                                                       | 4.9823763                  | 9.34159425                 | 8.3301235                  | 10.708797               | "Dbp"                   | 7.161985275                                                                 | 9.51949675                 | -2.3574744                 | 2.3574744   | 5.124724326 | Down in Atq <sup>+/+</sup> | Dbp                          |
| "Isgn1"                                                                     | 7.262826                   | 4.3425274                  | 8.94928                    | 7.3219056               | "Isgn1"                 | 5.8026767                                                                   | 8.1359168                  | -2.3332401                 | 2.3332401   | 5.03958523  | Down in Atq <sup>+/+</sup> | Isgn1                        |
| "Hfl2"                                                                      | 7.410817                   | 4.4265776                  | 8.652904                   | 7.846277                | "Hfl2"                  | 5.9186973                                                                   | 8.2498155                  | -2.3311182                 | 2.3311182   | 5.031952138 | Down in Atq <sup>+/+</sup> | Hfl2                         |
| "Ltl1"                                                                      | 7.159322                   | 4.3192844                  | 8.555838                   | 7.5345097               | "Ltl1"                  | 5.756032                                                                    | 8.04517385                 | -2.2897065                 | 2.2897065   | 4.885718187 | Down in Atq <sup>+/+</sup> | Ltl1                         |
| "Cxc9"                                                                      | 8.9027195                  | 7.0967464                  | 8.986239                   | 8.986239                | "Cxc9"                  | 8.0627195                                                                   | 10.3730535                 | -2.310234                  | 2.310234    | 4.9848484   | Down in Atq <sup>+/+</sup> | Cxc9                         |
| "Sic22a27"                                                                  | 6.8082786                  | 2.197813                   | 7.823599                   | 5.7339945               | "Sic22a27"              | 4.5003433                                                                   | 6.77879675                 | -2.27845345                | 2.27845345  | 4.851575924 | Down in Atq <sup>+/+</sup> | Sic22a27                     |
| "Cyp3a44"                                                                   | 7.09975                    | 7.4620177                  | 7.679458                   | 8.726787                | "Cyp3a44"               | 5.92979635                                                                  | 8.201225                   | -2.2732615                 | 2.2732615   | 4.834364515 | Down in Atq <sup>+/+</sup> | Cyp3a44                      |
| "Hfl3"                                                                      | 8.284914                   | 6.495468                   | 6.871162                   | 9.651105                | "Hfl3"                  | 7.390191                                                                    | 9.6621335                  | -2.2719425                 | 2.2719425   | 4.829729869 | Down in Atq <sup>+/+</sup> | Hfl3                         |
| "Cnd1"                                                                      | 6.881846233                | 6.3427601                  | 8.888541                   | 8.870894813             | "Cnd1"                  | 6.612303167                                                                 | 8.882717917                | -2.27041475                | 2.27041475  | 4.824618106 | Down in Atq <sup>+/+</sup> | Cnd1                         |
| "Mtd1g1"                                                                    | 7.2681279                  | 7.445812                   | 8.460051                   | 8.154167                | "Mtd1g1"                | 7.292168                                                                    | 9.382473                   | -2.1302768                 | 2.1302768   | 4.523073687 | Down in Atq <sup>+/+</sup> | Mtd1g1                       |
| "Pion"                                                                      | 1.866185                   | 2.3517625                  | 5.176118                   | 3.5168502               | "Pion"                  | 2.1089739                                                                   | 4.3464841                  | -2.2375102                 | 2.2375102   | 4.715825058 | Down in Atq <sup>+/+</sup> | Pion                         |
| "Ddx60"                                                                     | 5.328057                   | 4.358453                   | 7.3674917                  | 6.76223                 | "Ddx60"                 | 4.84352935                                                                  | 7.06468085                 | -2.2213315                 | 2.2213315   | 4.66321618  | Down in Atq <sup>+/+</sup> | Ddx60                        |
| "Gamt"                                                                      | 7.5735083                  | 7.947263                   | 9.293882                   | 10.624493               | "Gamt"                  | 7.76038585                                                                  | 9.9591395                  | -2.19880785                | 2.19880785  | 4.509998148 | Down in Atq <sup>+/+</sup> | Gamt                         |
| "Pgr1"                                                                      | 4.311902                   | 4.022158                   | 6.9781394                  | 6.7340337               | "Pgr1"                  | 4.14703                                                                     | 6.5313265                  | -2.1862965                 | 2.1862965   | 4.551535639 | Down in Atq <sup>+/+</sup> | Pgr1                         |
| "Pnk10"                                                                     | 5.851679                   | 7.220335                   | 10.632149                  | 11.113488               | "Pnk10"                 | 5.714931775                                                                 | 8.2149375                  | -2.5009375                 | 2.5009375   | 4.51565151  | Down in Atq <sup>+/+</sup> | Pnk10                        |
| "Hsd3b2"                                                                    | 4.4775596                  | 5.47738505                 | 6.460696                   | 7.828715                | "Hsd3b2"                | 4.97747325                                                                  | 7.14218375                 | -2.164711425               | 2.164711425 | 4.483767357 | Down in Atq <sup>+/+</sup> | Hsd3b2                       |
| "Pdgfs"                                                                     | 7.3794215                  | 6.4548814                  | 8.84097                    | 9.3262                  | "Pdgfs"                 | 6.9171545                                                                   | 9.0801485                  | -2.16299705                | 2.16299705  | 4.478442397 | Down in Atq <sup>+/+</sup> | Pdgfs                        |
| "Trim21"                                                                    | 5.5226374                  | 5.7658993                  | 8.022055                   | 7.5884413               | "Trim21"                | 5.6443333                                                                   | 7.80344815                 | -2.1591348                 | 2.1591348   | 4.466469159 | Down in Atq <sup>+/+</sup> | Trim21                       |
| "Igf1"                                                                      | 8.946358                   | 8.975899                   | 11.302227                  | 10.631104               | "Igf1"                  | 8.8111285                                                                   | 10.966655                  | -2.155537                  | 2.155537    | 4.453454533 | Down in Atq <sup>+/+</sup> | Igf1                         |
| "Akr1c5"                                                                    | 11.454666                  | 11.903191                  | 11.80148                   | 11.899467               | "Akr1c5"                | 11.4994928                                                                  | 13.85183485                | -2.352342                  | 2.352342    | 4.41413398  | Down in Atq <sup>+/+</sup> | Akr1c5                       |
| "Parg1a"                                                                    | 7.3453937                  | 7.023765                   | 9.415812                   | 9.251224                | "Parg1a"                | 7.18457935                                                                  | 9.333518                   | -2.14893865                | 2.14893865  | 4.435013973 | Down in Atq <sup>+/+</sup> | Parg1a                       |
| "Elife3"                                                                    | 5.53468275                 | 5.3095685                  | 7.2855913                  | 7.849117                | "Elife3"                | 5.422125625                                                                 | 7.56735415                 | -2.145228525               | 2.145228525 | 4.423621266 | Down in Atq <sup>+/+</sup> | Elife3                       |
| "Irgm2"                                                                     | 7.9921784                  | 7.996522                   | 10.346045                  | 9.916234                | "Irgm2"                 | 7.9943502                                                                   | 10.1316345                 | -2.1372843                 | 2.1372843   | 4.399311452 | Down in Atq <sup>+/+</sup> | Irgm2                        |
| "Hao2"                                                                      | 2.4341195                  | 2.4274862                  | 6.747094                   | 2.9621595               | "Hao2"                  | 2.42780105                                                                  | 4.55462675                 | -2.1268257                 | 2.1268257   | 4.387954488 | Down in Atq <sup>+/+</sup> | Hao2                         |
| "H2-Tb2"                                                                    | 4.477944                   | 4.792225                   | 8.47121                    | 8.031187                | "H2-Tb2"                | 4.1198447                                                                   | 7.23649025                 | -2.11748135                | 2.11748135  | 4.339302128 | Down in Atq <sup>+/+</sup> | H2-Tb2                       |
| "Ecpd1"                                                                     | 5.12335                    | 6.1122313                  | 7.725289                   | 7.73233                 | "Ecpd1"                 | 5.6179065                                                                   | 7.7292615                  | -2.1114705                 | 2.1114705   | 4.321315302 | Down in Atq <sup>+/+</sup> | Ecpd1                        |
| "Mterf3"                                                                    | 2.664099                   |                            |                            |                         |                         |                                                                             |                            |                            |             |             |                            |                              |

|                 |              |             |             |             |                 |              |             |              |             |              |                           |        |               |
|-----------------|--------------|-------------|-------------|-------------|-----------------|--------------|-------------|--------------|-------------|--------------|---------------------------|--------|---------------|
| "Aif1"          | 8.580107     | 6.3145323   | 9.735881    | 8.664101    | "Aif1"          | 7.44731965   | 9.199991    | -1.75267135  | 1.75267135  | 3.698819576  | Down in Atg <sup>10</sup> | Fasted | Aif1          |
| "Srebf1"        | 8.627753     | 8.045313    | 10.489935   | 8.687003    | "Srebf1"        | 8.336533     | 10.088469   | -1.7579136   | 1.7579136   | 3.988102397  | Down in Atg <sup>10</sup> | Fasted | Srebf1        |
| "Tbcl1d19"      | 3.916465     | 3.4137446   | 5.596818    | 5.237719    | "Tbcl1d19"      | 3.4653814    | 5.41262848  | -1.7470018   | 1.7470018   | 3.356660129  | Down in Atg <sup>10</sup> | Fasted | Tbcl1d19      |
| "Cyp3a10"       | 3.454496     | 3.427617    | 6.957515    | 3.463177    | "Cyp3a10"       | 3.4640332    | 5.2103447   | -1.7464015   | 1.7464015   | 3.355206357  | Down in Atg <sup>10</sup> | Fasted | Cyp3a10       |
| "Slc2a9"        | 4.0750074    | 4.4551654   | 5.766025    | 6.243099    | "Slc2a9"        | 4.2508664    | 6.00446825  | -1.73938185  | 1.73938185  | 3.318920747  | Down in Atg <sup>10</sup> | Fasted | Slc2a9        |
| "Tlra"          | 3.1332575    | 3.25518275  | 5.5770015   | 4.2700585   | "Tlra"          | 3.194220125  | 4.9235278   | -1.729306765 | 1.729306765 | 3.315686659  | Down in Atg <sup>10</sup> | Fasted | Tlra          |
| "Pla2g4a"       | 5.6045413    | 5.5795636   | 7.5649304   | 7.0721236   | "Pla2g4a"       | 5.5920245    | 7.319082    | -1.72720955  | 1.72720955  | 3.31045507   | Down in Atg <sup>10</sup> | Fasted | Pla2g4a       |
| "Spcl"          | 5.267032     | 5.13358905  | 7.4805178   | 6.3017075   | "Spcl"          | 5.320710775  | 7.0457276   | -1.72564689  | 1.72564689  | 3.305945471  | Down in Atg <sup>10</sup> | Fasted | Spcl          |
| "Slc44a3"       | 3.4758072    | 3.4859343   | 5.050287    | 5.356017    | "Slc44a3"       | 3.48087075   | 5.20314285  | -1.7222721   | 1.7222721   | 3.29955645   | Down in Atg <sup>10</sup> | Fasted | Slc44a3       |
| "Cdc25"         | 3.1941867    | 5.7914977   | 7.3626384   | 5.064076    | "Cdc25"         | 4.4928422    | 6.2130797   | -1.7202375   | 1.7202375   | 3.29490644   | Down in Atg <sup>10</sup> | Fasted | Cdc25         |
| "D4Wsu53e"      | 7.54045533   | 8.3357895   | 9.87326333  | 9.422515667 | "D4Wsu53e"      | 7.938117517  | 9.647876    | -1.709758483 | 1.709758483 | 3.271060591  | Down in Atg <sup>10</sup> | Fasted | D4Wsu53e      |
| "Gstm7"         | 5.7377205    | 6.7849493   | 8.2181015   | 7.7167377   | "Gstm7"         | 6.2613349    | 7.9672396   | -1.7059047   | 1.7059047   | 3.262334466  | Down in Atg <sup>10</sup> | Fasted | Gstm7         |
| "Tlec"          | 5.016517     | 4.4469427   | 7.0607834   | 5.895552    | "Tlec"          | 4.7667985    | 6.4781677   | -1.701480785 | 1.701480785 | 3.252362062  | Down in Atg <sup>10</sup> | Fasted | Tlec          |
| "Ctcf4"         | 7.5649184    | 6.218192    | 9.160144    | 8.011199    | "Ctcf4"         | 6.89155253   | 8.5856715   | -1.69411625  | 1.69411625  | 3.235786117  | Down in Atg <sup>10</sup> | Fasted | Ctcf4         |
| "Nqo1"          | 5.353037     | 6.357605    | 8.061686    | 7.0331526   | "Nqo1"          | 5.855321     | 7.5474193   | -1.6920893   | 1.6920893   | 3.231263269  | Down in Atg <sup>10</sup> | Fasted | Nqo1          |
| "Cela1"         | 6.177096     | 7.7506623   | 7.336305    | 9.947484    | "Cela1"         | 6.96418599   | 8.65552225  | -1.6913363   | 1.6913363   | 3.229557037  | Down in Atg <sup>10</sup> | Fasted | Cela1         |
| "Stamfp1"       | 3.3959458    | 2.7865659   | 5.610692    | 3.943599    | "Stamfp1"       | 3.09310135   | 4.77981595  | -1.6885146   | 1.6885146   | 3.22124667   | Down in Atg <sup>10</sup> | Fasted | Stamfp1       |
| "Nret1a"        | 4.423429     | 6.572311    | 7.130214    | 7.2399163   | "Nret1a"        | 4.59778      | 7.18506385  | -1.68728185  | 1.68728185  | 3.220498123  | Down in Atg <sup>10</sup> | Fasted | Nret1a        |
| "Irf4"          | 11.171717    | 10.914978   | 12.513876   | 12.903413   | "Irf4"          | 11.0264075   | 12.7086445  | -1.682597    | 1.682597    | 3.210052739  | Down in Atg <sup>10</sup> | Fasted | Irf4          |
| "Slc22a30"      | 8.805788     | 8.505639    | 10.749114   | 9.921264    | "Slc22a30"      | 8.6557135    | 10.136189   | -1.6804755   | 1.6804755   | 3.205135788  | Down in Atg <sup>10</sup> | Fasted | Slc22a30      |
| "T3"            | 8.022041     | 9.242965    | 9.979953    | 10.644886   | "T3"            | 8.623509     | 10.3124195  | -1.6799165   | 1.6799165   | 3.2040494059 | Down in Atg <sup>10</sup> | Fasted | T3            |
| "Snh3"          | 4.776535     | 3.8992937   | 6.822186    | 5.544773    | "Snh3"          | 4.33441435   | 6.0109413   | -1.67652495  | 1.67652495  | 3.197575014  | Down in Atg <sup>10</sup> | Fasted | Snh3          |
| "Igm1"          | 7.272593     | 7.6406      | 9.725018    | 8.977096    | "Igm1"          | 7.6815965    | 9.351462    | -1.6696855   | 1.6696855   | 3.181348283  | Down in Atg <sup>10</sup> | Fasted | Igm1          |
| "Prtn3"         | 10.094868    | 7.9359145   | 11.142998   | 10.227074   | "Prtn3"         | 9.01539125   | 10.685036   | -1.66964475  | 1.66964475  | 3.181362458  | Down in Atg <sup>10</sup> | Fasted | Prtn3         |
| "Gas2"          | 6.4865932    | 5.682317    | 7.2421133   | 9.165085    | "Gas2"          | 6.5344551    | 8.20314915  | -1.66868905  | 1.66868905  | 3.17926671   | Down in Atg <sup>10</sup> | Fasted | Gas2          |
| "Ighv14-2"      | 3.144136     | 3.4797535   | 5.571049    | 4.294416    | "Ighv14-2"      | 3.31194475   | 4.9799568   | -1.66802105  | 1.66802105  | 3.177783968  | Down in Atg <sup>10</sup> | Fasted | Ighv14-2      |
| "Cyp21a1"       | 6.982197     | 7.94429933  | 8.701468    | 9.5468067   | "Cyp21a1"       | 7.44863089   | 9.145698139 | -1.667562717 | 1.667562717 | 3.176260262  | Down in Atg <sup>10</sup> | Fasted | Cyp21a1       |
| "Cyp7a1"        | 5.9499175    | 9.1400123   | 8.423745    | 9.62503     | "Cyp7a1"        | 7.36750025   | 9.0243875   | -1.65888475  | 1.65888475  | 3.153530365  | Down in Atg <sup>10</sup> | Fasted | Cyp7a1        |
| "Cid48"         | 6.6972756    | 5.2522073   | 8.093045    | 7.15848     | "Cid48"         | 5.97474145   | 7.6307625   | -1.65602105  | 1.65602105  | 3.151461262  | Down in Atg <sup>10</sup> | Fasted | Cid48         |
| "Dio1"          | 8.941373     | 10.63514    | 10.99471    | 11.892215   | "Dio1"          | 9.7882565    | 11.44350215 | -1.65524475  | 1.65524475  | 3.149762112  | Down in Atg <sup>10</sup> | Fasted | Dio1          |
| "Elovl6"        | 6.32203745   | 6.9894509   | 8.08277115  | 8.5321775   | "Elovl6"        | 6.655744175  | 8.307474325 | -1.65173015  | 1.65173015  | 3.142102295  | Down in Atg <sup>10</sup> | Fasted | Elovl6        |
| "Tcf21"         | 7.2121203    | 4.0784229   | 7.7951448   | 7.8219647   | "Tcf21"         | 4.631717     | 6.0507946   | -1.6473187   | 1.6473187   | 3.14071292   | Down in Atg <sup>10</sup> | Fasted | Tcf21         |
| "Serpina3g"     | 7.3638571    | 5.6537786   | 8.448946    | 7.8573203   | "Serpina3g"     | 6.50881795   | 8.15311315  | -1.6443152   | 1.6443152   | 3.125994413  | Down in Atg <sup>10</sup> | Fasted | Serpina3g     |
| "Bdh1"          | 5.36724365   | 8.2086385   | 8.186706    | 8.6252085   | "Bdh1"          | 6.787941075  | 8.420963425 | -1.63302235  | 1.63302235  | 3.101620875  | Down in Atg <sup>10</sup> | Fasted | Bdh1          |
| "Ncagg2"        | 5.0161245    | 2.677374    | 5.7030064   | 5.215154    | "Ncagg2"        | 3.82702925   | 5.4573052   | -1.63027595  | 1.63027595  | 3.095722061  | Down in Atg <sup>10</sup> | Fasted | Ncagg2        |
| "Pld4"          | 5.9636726    | 4.790072    | 7.3843865   | 6.226545    | "Pld4"          | 5.3768723    | 7.00546575  | -1.62859345  | 1.62859345  | 3.09211387   | Down in Atg <sup>10</sup> | Fasted | Pld4          |
| "D04H45114"     | 3.0484326    | 5.4423235   | 8.0979146   | 6.210434    | "D04H45114"     | 3.0484326    | 5.4423235   | -1.62859345  | 1.62859345  | 3.086500052  | Down in Atg <sup>10</sup> | Fasted | D04H45114     |
| "Pldm4"         | 4.040705     | 2.7116401   | 5.056182    | 4.951945    | "Pldm4"         | 3.37935955   | 5.00393825  | -1.6245787   | 1.6245787   | 3.083521061  | Down in Atg <sup>10</sup> | Fasted | Pldm4         |
| "Trim30a"       | 6.658150233  | 4.916036133 | 7.726782167 | 7.099085433 | "Trim30a"       | 5.787093183  | 7.4088838   | -1.621790617 | 1.621790617 | 3.07756775   | Down in Atg <sup>10</sup> | Fasted | Trim30a       |
| "Fam105a"       | 4.4272905    | 4.0596655   | 6.4457408   | 5.332202    | "Fam105a"       | 4.283977     | 5.9033864   | -1.6194904   | 1.6194904   | 3.072492311  | Down in Atg <sup>10</sup> | Fasted | Fam105a       |
| "Ube2b"         | 5.3547482    | 4.394243    | 6.553437    | 6.425646    | "Ube2b"         | 4.8744956    | 6.4895415   | -1.6150459   | 1.6150459   | 3.06321343   | Down in Atg <sup>10</sup> | Fasted | Ube2b         |
| "Ube"           | 4.6221866    | 6.5177908   | 8.680395    | 7.462947    | "Ube"           | 4.1628953    | 5.7438126   | -1.60928178  | 1.60928178  | 3.059124166  | Down in Atg <sup>10</sup> | Fasted | Ube           |
| "Ct7b9"         | 3.6568954    | 4.3844323   | 5.888497    | 5.3713293   | "Ct7b9"         | 4.0206385    | 5.6299145   | -1.60925065  | 1.60925065  | 3.059931322  | Down in Atg <sup>10</sup> | Fasted | Ct7b9         |
| "Slp5"          | 3.8576858    | 4.4744687   | 5.1808444   | 6.369714    | "Slp5"          | 4.16607725   | 5.7752992   | -1.60922195  | 1.60922195  | 3.050872629  | Down in Atg <sup>10</sup> | Fasted | Slp5          |
| "Ncald"         | 5.6744667    | 4.7683815   | 7.0574422   | 6.6848125   | "Ncald"         | 5.266842425  | 6.87113185  | -1.604289425 | 1.604289425 | 3.040459611  | Down in Atg <sup>10</sup> | Fasted | Ncald         |
| "Lnx1"          | 3.1517545    | 3.4799125   | 5.068433    | 4.7618825   | "Lnx1"          | 3.31581535   | 4.915167925 | -1.599332575 | 1.599332575 | 3.030311004  | Down in Atg <sup>10</sup> | Fasted | Lnx1          |
| "Acot2"         | 5.3971385    | 3.3881895   | 5.1397135   | 7.0178175   | "Acot2"         | 5.49548643   | 7.119921503 | -1.598149125 | 1.598149125 | 3.023777426  | Down in Atg <sup>10</sup> | Fasted | Acot2         |
| "Ngef"          | 5.68355      | 6.2990284   | 7.543717    | 8.526703    | "Ngef"          | 6.4411917    | 8.035209    | -1.5940173   | 1.5940173   | 3.018888188  | Down in Atg <sup>10</sup> | Fasted | Ngef          |
| "BC021614"      | 4.5731654    | 5.1243978   | 6.822186    | 6.0479345   | "BC021614"      | 4.4887816    | 6.43506025  | -1.58627865  | 1.58627865  | 3.002738104  | Down in Atg <sup>10</sup> | Fasted | BC021614      |
| "Cyp4a14"       | 7.80897      | 13.542629   | 2.8957175   | 5.089205    | "Cyp4a14"       | 10.7567995   | 3.9933914   | 6.6824081    | 6.6824081   | 102.7082386  | Down in Atg <sup>10</sup> | Fasted | Cyp4a14       |
| "Cknl1a"        | 9.765074     | 8.4113845   | 4.5371875   | 3.63593565  | "Cknl1a"        | 9.088229125  | 3.9945662   | 5.093662925  | 5.093662925 | 34.14643182  | Down in Atg <sup>10</sup> | Fasted | Cknl1a        |
| "Tm3"           | 8.950563     | 3.2077043   | 7.424749    | 6.269044    | "Tm3"           | 8.1360685    | 4.55914685  | 4.7596498    | 4.7596498   | 1.68083477   | Down in Atg <sup>10</sup> | Fasted | Tm3           |
| "Lcp"           | 8.951594     | 5.9315265   | 4.0969648   | 2.629044    | "Lcp"           | 7.441553325  | 3.3633846   | 4.078168725  | 4.078168725 | 16.89083477  | Down in Atg <sup>10</sup> | Fasted | Lcp           |
| "Ddit4"         | 12.552324    | 11.419613   | 9.440683    | 7.0178113   | "Ddit4"         | 11.5859685   | 8.22924715  | 3.75672135   | 3.75672135  | 13.5171712   | Down in Atg <sup>10</sup> | Fasted | Ddit4         |
| "Cyp4a10"       | 10.382945    | 14.170708   | 6.2831435   | 10.852322   | "Cyp4a10"       | 12.2768265   | 8.55423275  | 3.72259375   | 3.72259375  | 13.02116868  | Down in Atg <sup>10</sup> | Fasted | Cyp4a10       |
| "Cyp2b10"       | 10.025047133 | 11.743793   | 8.53507333  | 7.848027    | "Cyp2b10"       | 11.819713217 | 8.185667167 | 3.711465     | 3.711465    | 13.09972844  | Down in Atg <sup>10</sup> | Fasted | Cyp2b10       |
| "Nab1"          | 10.336603    | 9.921817    | 8.803483    | 7.691247    | "Nab1"          | 10.37912619  | 6.7331518   | 3.6477125    | 3.6477125   | 13.0471308   | Down in Atg <sup>10</sup> | Fasted | Nab1          |
| "Acot1"         | 7.4212065    | 10.616214   | 4.8204646   | 8.341109    | "Acot1"         | 9.01871025   | 5.5807838   | 3.4379245    | 3.4379245   | 10.83724731  | Down in Atg <sup>10</sup> | Fasted | Acot1         |
| "Slc25a25"      | 8.785505     | 6.487537    | 3.4322      | 4.0656385   | "Slc25a25"      | 7.363521     | 4.20391925  | 3.43260175   | 3.43260175  | 10.79732219  | Down in Atg <sup>10</sup> | Fasted | Slc25a25      |
| "Slc10a6"       | 7.7052466    | 4.487883    | 2.9811794   | 2.5258342   | "Slc10a6"       | 6.0965738    | 2.753476    | 3.3430978    | 3.3430978   | 10.14781909  | Down in Atg <sup>10</sup> | Fasted | Slc10a6       |
| "1810055G02Rik" | 9.7140665    | 8.95095     | 6.2991056   | 5.840117    | "1810055G02Rik" | 9.33250825   | 6.0250112   | 3.30749705   | 3.30749705  | 9.900470239  | Down in Atg <sup>10</sup> | Fasted | 1810055G02Rik |
| "Cyp4a12a"      | 9.2140545    | 8.2231225   | 6.217861    | 5.578627    | "Cyp4a12a"      | 5.62312125   | 4.4013261   | 3.27104235   | 3.27104235  | 9.853451626  | Down in Atg <sup>10</sup> | Fasted | Cyp4a12a      |
| "Gadd45b"       | 8.761055     | 7.3891177   | 5.195399    | 4.5975055   | "Gadd45b"       | 8.07509635   | 4.8967975   | 3.178299     | 3.178299    | 9.052391626  | Down in Atg <sup>10</sup> | Fasted | Gadd45b       |
| "Plin5"         | 8.606551     | 10.424597   | 6.222135    | 6.5813303   | "Plin5"         | 9.515574     | 6.40172605  | 3.1384135    | 3.1384135   | 8.65684515   | Down in Atg <sup>10</sup> | Fasted | Plin5         |
| "Sik1"          | 9.079668     | 5.4663224   | 4.4802036   | 3.9112027   | "Sik1"          | 7.2729552    | 1.9567038   | 3.07729205   | 3.07729205  | 8.440286962  | Down in Atg <sup>10</sup> | Fasted | Sik1          |
| "Hfd1"          | 11.889616    | 8.922522    | 7.0584356   | 7.056788    | "Hfd1"          | 10.390609    | 4.3542025   | 3.0414482    | 3.0414482   | 8.337171053  | Down in Atg <sup>10</sup> | Fasted | Hfd1          |
| "700017805Rik"  | 4.672464     | 5.7949275   | 3.2052716   | 3.657078    | "700017805Rik"  | 4.40074848   | 4.40613268  | 3.03873075   | 3.03873075  | 8.018630867  | Down in Atg <sup>10</sup> | Fasted | 700017805Rik  |
| "Angpt1"        | 10.21368     | 7.1607331   | 5.0831624   | 3.989770    | "Angpt1"        | 8.68270705   | 5.74104515  | 2.9461819    | 2.9461819   | 7.700592983  |                           |        |               |

|               |             |             |             |             |               |             |             |             |             |             |                           |        |             |
|---------------|-------------|-------------|-------------|-------------|---------------|-------------|-------------|-------------|-------------|-------------|---------------------------|--------|-------------|
| "Rassf1"      | 6.912343    | 5.447235    | 4.000123    | 4.660691    | "Rassf1"      | 6.179789    | 4.330407    | 1.849382    | 1.849382    | 3.603457925 | Up. in. Aig <sup>tm</sup> | Fasted | Rassf1      |
| "Fam134b"     | 13.395218   | 12.68444    | 11.24907125 | 11.135067   | "Fam134b"     | 13.039829   | 11.19206913 | 1.847759875 | 1.847759875 | 3.599408577 | Up. in. Aig <sup>tm</sup> | Fasted | Fam134b     |
| "Cyp26a1"     | 9.985359    | 8.976977    | 6.7271085   | 8.554353    | "Cyp26a1"     | 9.481168    | 7.64073075  | 1.84041275  | 1.84041275  | 1.5811855   | Up. in. Aig <sup>tm</sup> | Fasted | Cyp26a1     |
| "Chac1"       | 8.963326    | 7.002385    | 6.502994    | 5.7824645   | "Chac1"       | 7.982857    | 6.14272935  | 1.84012775  | 1.84012775  | 3.580417314 | Up. in. Aig <sup>tm</sup> | Fasted | Chac1       |
| "Atoh8"       | 5.957793    | 2.829845    | 2.2352467   | 2.8979337   | "Atoh8"       | 4.39381875  | 2.5665902   | 1.82722855  | 1.82722855  | 3.548547333 | Up. in. Aig <sup>tm</sup> | Fasted | Atoh8       |
| "Klf4"        | 7.4672595   | 4.6725276   | 4.391744    | 4.3986823   | "Klf4"        | 6.21989355  | 4.39521315  | 1.8246804   | 1.8246804   | 3.542285268 | Up. in. Aig <sup>tm</sup> | Fasted | Klf4        |
| "Rabgef1"     | 8.424324133 | 6.664941533 | 5.961675967 | 5.504091233 | "Rabgef1"     | 7.544632833 | 5.7328846   | 1.811748233 | 1.811748233 | 3.510674484 | Up. in. Aig <sup>tm</sup> | Fasted | Rabgef1     |
| "Rc2l11"      | 6.70058918  | 4.8583019   | 3.9303232   | 4.03113642  | "Rc2l11"      | 5.7944554   | 3.98522937  | 1.79421617  | 1.79421617  | 3.468269892 | Up. in. Aig <sup>tm</sup> | Fasted | Rc2l11      |
| "Maff"        | 8.982677    | 2.7494369   | 1.470609    | 4.6780376   | "Maff"        | 5.86605695  | 4.0743233   | 1.79173365  | 1.79173365  | 3.462306993 | Up. in. Aig <sup>tm</sup> | Fasted | Maff        |
| "Socs2"       | 12.301066   | 11.2383415  | 10.249299   | 9.708657    | "Socs2"       | 11.76970375 | 9.978978    | 1.79072575  | 1.79072575  | 3.45988899  | Up. in. Aig <sup>tm</sup> | Fasted | Socs2       |
| "Cirbp"       | 7.944811    | 8.745747    | 6.6041856   | 6.5300593   | "Cirbp"       | 8.345279    | 6.56712245  | 1.77815655  | 1.77815655  | 3.42987631  | Up. in. Aig <sup>tm</sup> | Fasted | Cirbp       |
| "Ugt2b38"     | 5.563176    | 10.140636   | 3.610997    | 8.540987    | "Ugt2b38"     | 7.851906    | 6.075992    | 1.775914    | 1.775914    | 3.424548992 | Up. in. Aig <sup>tm</sup> | Fasted | Ugt2b38     |
| "Ppp1r15a"    | 2.641602    | 6.042271    | 5.596809    | 5.554597    | "Ppp1r15a"    | 7.3413965   | 5.57598435  | 1.76623215  | 1.76623215  | 3.401691126 | Up. in. Aig <sup>tm</sup> | Fasted | Ppp1r15a    |
| "Retna"       | 9.925987    | 5.685643    | 2.5421343   | 2.5372952   | "Retna"       | 4.305815    | 2.59771675  | 1.76609825  | 1.76609825  | 3.401328268 | Up. in. Aig <sup>tm</sup> | Fasted | Retna       |
| "Thbd"        | 8.18854     | 7.187605    | 5.695106    | 6.173248    | "Thbd"        | 7.6880725   | 5.934177    | 1.7538955   | 1.7538955   | 3.372680136 | Up. in. Aig <sup>tm</sup> | Fasted | Thbd        |
| "Trp53inp1"   | 9.97383825  | 8.12259015  | 7.3512692   | 7.26157515  | "Trp53inp1"   | 9.0482142   | 7.306422175 | 1.741792025 | 1.741792025 | 3.34450343  | Up. in. Aig <sup>tm</sup> | Fasted | Trp53inp1   |
| "Dit"         | 8.939843    | 7.98571235  | 6.51884015  | 6.936295    | "Dit"         | 8.462777675 | 6.727834825 | 1.73494285  | 1.73494285  | 3.328663077 | Up. in. Aig <sup>tm</sup> | Fasted | Dit         |
| "Rc027231"    | 7.0460594   | 6.5583353   | 4.93612     | 5.1957517   | "Rc027231"    | 6.79747035  | 5.06593585  | 1.7315345   | 1.7315345   | 3.320808411 | Up. in. Aig <sup>tm</sup> | Fasted | Rc027231    |
| "Mag3k5"      | 8.352873    | 8.314534    | 6.2738463   | 7.004113    | "Mag3k5"      | 8.3536925   | 6.63797965  | 1.71571285  | 1.71571285  | 3.284588983 | Up. in. Aig <sup>tm</sup> | Fasted | Mag3k5      |
| "Zfp746"      | 8.026871    | 7.0027976   | 5.748114    | 5.870628    | "Zfp746"      | 7.5148343   | 5.809371    | 1.7054633   | 1.7054633   | 3.261136491 | Up. in. Aig <sup>tm</sup> | Fasted | Zfp746      |
| "Sgk1"        | 13.182602   | 10.251591   | 10.113218   | 9.924009    | "Sgk1"        | 11.7170965  | 10.0186135  | 1.698483    | 1.698483    | 3.245595033 | Up. in. Aig <sup>tm</sup> | Fasted | Sgk1        |
| "D16ftrd472e" | 9.249509333 | 7.008099067 | 6.3394421   | 6.522829967 | "D16ftrd472e" | 8.1288042   | 6.431136033 | 1.697668167 | 1.697668167 | 3.243762441 | Up. in. Aig <sup>tm</sup> | Fasted | D16ftrd472e |
| "Temp"        | 10.474244   | 8.1540425   | 7.2171505   | 8.0207338   | "Temp"        | 9.314414325 | 7.61894215  | 1.6952011   | 1.6952011   | 3.238220216 | Up. in. Aig <sup>tm</sup> | Fasted | Temp        |
| "Peg3"        | 6.3209766   | 5.1798433   | 4.365081567 | 3.754097733 | "Peg3"        | 5.75040895  | 4.05958965  | 1.6908193   | 1.6908193   | 3.228399951 | Up. in. Aig <sup>tm</sup> | Fasted | Peg3        |
| "Ccnf"        | 4.408216    | 6.2648544   | 2.8754787   | 4.423952    | "Ccnf"        | 5.3365352   | 3.64971535  | 1.68681985  | 1.68681985  | 3.21946251  | Up. in. Aig <sup>tm</sup> | Fasted | Ccnf        |
| "D7ftrd183e"  | 7.258331    | 3.7200282   | 3.9044766   | 3.7019768   | "D7ftrd183e"  | 5.4891796   | 3.8032267   | 1.6859529   | 1.6859529   | 3.217528439 | Up. in. Aig <sup>tm</sup> | Fasted | D7ftrd183e  |
| "Abcd4"       | 7.7532206   | 7.748437    | 6.07662     | 6.0596213   | "Abcd4"       | 7.7508288   | 6.06812065  | 1.68270815  | 1.68270815  | 3.210300062 | Up. in. Aig <sup>tm</sup> | Fasted | Abcd4       |
| "Cry2"        | 6.1439204   | 7.059952    | 5.101697    | 5.3726      | "Cry2"        | 6.9193962   | 5.2372985   | 1.6826377   | 1.6826377   | 3.210143299 | Up. in. Aig <sup>tm</sup> | Fasted | Cry2        |
| "Slc45a3"     | 8.3443425   | 7.6873795   | 7.0469986   | 5.61966265  | "Slc45a3"     | 8.01586925  | 6.333330625 | 1.6825303   | 1.6825303   | 3.209904332 | Up. in. Aig <sup>tm</sup> | Fasted | Slc45a3     |
| "Tns1"        | 7.390799    | 8.13620475  | 6.0952485   | 6.07076085  | "Tns1"        | 7.763501875 | 6.083004675 | 1.6804972   | 1.6804972   | 3.205384    | Up. in. Aig <sup>tm</sup> | Fasted | Tns1        |
| "Cebpd"       | 10.2247305  | 9.483505    | 8.692074    | 7.6589117   | "Cebpd"       | 9.85411775  | 8.17549285  | 1.6786249   | 1.6786249   | 3.201226817 | Up. in. Aig <sup>tm</sup> | Fasted | Cebpd       |
| "Cry2"        | 9.785486    | 7.551902    | 6.4127183   | 7.582976    | "Cry2"        | 8.668694    | 6.99784715  | 1.67084685  | 1.67084685  | 3.184014377 | Up. in. Aig <sup>tm</sup> | Fasted | Cry2        |
| "Tipr1"       | 9.90303725  | 8.11302     | 7.4220825   | 7.3763093   | "Tipr1"       | 9.062528625 | 7.399197775 | 1.66333085  | 1.66333085  | 3.167469769 | Up. in. Aig <sup>tm</sup> | Fasted | Tipr1       |
| "Sens2"       | 7.92125685  | 5.916142    | 5.170433    | 5.3532432   | "Sens2"       | 6.918699425 | 5.2618381   | 1.656861325 | 1.656861325 | 3.15329758  | Up. in. Aig <sup>tm</sup> | Fasted | Sens2       |
| "Ugt2b37"     | 7.4225655   | 9.673351    | 4.880447    | 8.9391985   | "Ugt2b37"     | 8.54795825  | 6.8940716   | 1.65388665  | 1.65388665  | 3.146802533 | Up. in. Aig <sup>tm</sup> | Fasted | Ugt2b37     |
| "Fbxo31"      | 7.6094525   | 7.573633    | 6.023127    | 5.878417    | "Fbxo31"      | 7.59152925  | 5.950772    | 1.64075725  | 1.64075725  | 3.118294637 | Up. in. Aig <sup>tm</sup> | Fasted | Fbxo31      |
| "Baiap21"     | 9.54418     | 10.5791315  | 8.273821    | 8.57141     | "Baiap21"     | 10.06165575 | 8.4226155   | 1.63904025  | 1.63904025  | 3.114585697 | Up. in. Aig <sup>tm</sup> | Fasted | Baiap21     |
| "Apoa5"       | 13.953965   | 13.869656   | 11.886409   | 12.66023    | "Apoa5"       | 13.9801095  | 12.2721216  | 1.6367945   | 1.6367945   | 3.109741155 | Up. in. Aig <sup>tm</sup> | Fasted | Apoa5       |
| "Dusp1"       | 12.05964    | 10.346683   | 9.853333    | 9.296618    | "Dusp1"       | 11.2031615  | 9.5749755   | 1.628186    | 1.628186    | 3.091240712 | Up. in. Aig <sup>tm</sup> | Fasted | Dusp1       |
| "Cdc6"        | 11.85934075 | 9.8599415   | 9.5551695   | 8.927004    | "Cdc6"        | 10.85964113 | 9.23793675  | 1.621704375 | 1.621704375 | 3.077383784 | Up. in. Aig <sup>tm</sup> | Fasted | Cdc6        |
| "Gm3579"      | 7.69525425  | 7.7705762   | 5.71661275  | 6.7103476   | "Gm3579"      | 7.834915225 | 6.213480175 | 1.62143505  | 1.62143505  | 3.076809346 | Up. in. Aig <sup>tm</sup> | Fasted | Gm3579      |
| "Ripk4"       | 6.748525    | 6.09483675  | 4.82943785  | 4.80215455  | "Ripk4"       | 6.421844625 | 4.8157962   | 1.606048425 | 1.606048425 | 3.044168939 | Up. in. Aig <sup>tm</sup> | Fasted | Ripk4       |
| "Serpinh3k"   | 11.023618   | 11.52136025 | 9.4965455   | 9.8458095   | "Serpinh3k"   | 11.2748913  | 9.6711875   | 1.601301625 | 1.601301625 | 3.03416938  | Up. in. Aig <sup>tm</sup> | Fasted | Serpinh3k   |
| "Zfp36"       | 10.783648   | 7.9908314   | 7.699348    | 7.896427    | "Zfp36"       | 9.3872397   | 7.7978875   | 1.5893522   | 1.5893522   | 3.009142024 | Up. in. Aig <sup>tm</sup> | Fasted | Zfp36       |
| "Pim3"        | 8.997179    | 7.384342033 | 6.472812267 | 6.737840867 | "Pim3"        | 8.190760517 | 6.605326567 | 1.58543395  | 1.58543395  | 3.000980511 | Up. in. Aig <sup>tm</sup> | Fasted | Pim3        |
