# Supplementary material
Source: PubMed Central journal article supplement (PMC4125614)
Supplement: NIHMS600167-supplement-6.pdf [file NIHMS600167-supplement-6.pdf]

|                 |             |             |             |             |             |             |             |             |
|-----------------|-------------|-------------|-------------|-------------|-------------|-------------|-------------|-------------|
| "1500032L24Rik" | 10.848239   | 11.190158   | 11.23093    | 11.061068   | 10.9678955  | 10.7811165  | 11.074809   | 10.933607   |
| "1600012F09Rik" | 5.727617233 | 6.197977133 | 6.027886033 | 6.382125933 | 5.936830833 | 5.7619633   | 6.073669567 | 5.264510633 |
| "1600012H06Rik" | 6.43350215  | 6.1668324   | 6.58100555  | 6.685422    | 6.5982195   | 6.489837    | 6.79073485  | 6.5851095   |
| "1600014C10Rik" | 5.5053715   | 4.58027055  | 5.27346635  | 5.10851025  | 5.16957205  | 4.9574418   | 5.28672215  | 5.2130042   |
| "1600015I10Rik" | 2.310085    | 2.3786476   | 2.3401928   | 2.43659     | 2.3424911   | 2.3199277   | 2.343596    | 2.418469    |
| "1600029D21Rik" | 2.2693975   | 2.246587    | 2.2275617   | 2.29378     | 2.223212    | 2.1852248   | 2.8668196   | 2.293108    |
| "1700001C19Rik" | 2.4389727   | 2.6133933   | 2.4968522   | 2.6060777   | 2.4973795   | 2.471166    | 2.4964526   | 2.592033    |
| "1700001F09Rik" | 2.602288    | 2.7128055   | 2.649859    | 2.7767043   | 2.662849    | 2.5997047   | 2.6276715   | 2.7493076   |
| "1700001J03Rik" | 2.4280777   | 2.5205555   | 2.4617195   | 2.5825934   | 2.4676132   | 2.4191394   | 2.4505541   | 2.5349638   |
| "1700001K19Rik" | 2.5272572   | 2.5850897   | 2.5429175   | 2.643558    | 2.5483456   | 2.5216775   | 2.5481763   | 2.6326785   |
| "1700001O22Rik" | 2.0620718   | 2.380311    | 2.092863    | 3.8345702   | 2.0913458   | 2.082407    | 2.0876021   | 2.1649077   |
| "1700008F21Rik" | 3.0958095   | 3.430834    | 3.2473996   | 3.4527361   | 3.2574203   | 3.1456347   | 3.235543    | 3.3758812   |
| "1700008P20Rik" | 2.4667096   | 2.5903506   | 2.519683    | 2.6114938   | 2.6913662   | 2.4712048   | 2.5142822   | 2.5690832   |
| "1700010I14Rik" | 2.7506039   | 2.994116533 | 2.875004533 | 2.955270833 | 2.8675836   | 2.796896533 | 2.8467295   | 2.915450633 |
| "1700011A15Rik" | 2.4888318   | 2.5883398   | 2.6602638   | 2.6169412   | 2.5378852   | 2.4986699   | 2.5527077   | 2.618711    |
| "1700011H14Rik" | 2.6183908   | 2.7171497   | 2.6463168   | 2.7911646   | 2.6582782   | 2.5926652   | 2.6446025   | 2.779433    |
| "1700016D06Rik" | 2.4227657   | 2.5505235   | 2.4668174   | 2.58866     | 2.4727407   | 2.4418502   | 2.445683    | 2.5727944   |
| "1700017B05Rik" | 6.6668873   | 4.268273    | 3.3326333   | 3.9241953   | 4.305738    | 5.647949    | 4.2191596   | 2.944075    |
| "1700018F24Rik" | 2.341102    | 2.4414217   | 2.3904037   | 2.4674358   | 2.3878279   | 2.3442597   | 2.3871264   | 2.4490492   |
| "1700019G17Rik" | 3.0887781   | 3.2918749   | 3.17059     | 3.3483742   | 3.16734155  | 3.08187565  | 3.45851885  | 3.30349895  |
| "1700019N12Rik" | 2.3497746   | 2.419601    | 2.3780932   | 2.4799604   | 2.3806124   | 2.3420856   | 2.3762572   | 2.466471    |
| "1700019N19Rik" | 2.5794408   | 2.6784947   | 2.610979    | 2.7136405   | 2.6235113   | 2.5600533   | 2.6092284   | 2.7423794   |
| "1700020D05Rik" | 2.6994615   | 2.780301    | 2.7463896   | 2.846439    | 2.74957     | 2.7182126   | 2.7469537   | 2.8231637   |
| "1700020I14Rik" | 6.9447894   | 6.8544836   | 6.99272     | 7.8050847   | 7.1196585   | 6.5399985   | 7.2268863   | 7.69723     |
| "1700021F05Rik" | 9.768938    | 9.7671      | 10.536567   | 10.835169   | 10.048697   | 9.393668    | 10.691146   | 10.688345   |
| "1700023D09Rik" | 2.6762278   | 3.1108773   | 2.9259338   | 3.091814    | 2.9358566   | 2.8572147   | 2.9220107   | 3.0930886   |
| "1700028P14Rik" | 2.888225    | 2.9967015   | 2.9218411   | 3.0165126   | 2.9278078   | 2.8864625   | 2.9217947   | 3.0365677   |
| "1700029F12Rik" | 2.826347    | 3.1895492   | 3.0147865   | 3.0866785   | 3.0145352   | 2.9943159   | 3.0141327   | 3.0855656   |
| "1700029H14Rik" | 2.515375    | 2.5788267   | 2.543376    | 2.6340659   | 2.5446417   | 2.5152802   | 2.5506027   | 2.6230001   |
| "1700029I01Rik" | 3.5771182   | 3.3123717   | 3.4397469   | 3.832698    | 3.8908024   | 3.704647    | 3.8207366   | 3.7612324   |
| "1700030K09Rik" | 3.7867894   | 4.5798125   | 4.053774    | 4.2037153   | 4.252158    | 4.9440026   | 4.5297413   | 4.181498    |
| "1700037H04Rik" | 3.6361704   | 3.7555192   | 3.6867244   | 3.5999234   | 3.9646816   | 4.300926    | 5.7142076   | 3.8719187   |
| "1700040I03Rik" | 6.639907    | 6.327701    | 7.3647532   | 7.5767574   | 6.347915    | 5.5434003   | 7.484631    | 7.311902    |
| "1700052N19Rik" | 4.9615529   | 4.9140112   | 4.9765294   | 5.34057785  | 4.8094583   | 4.24301765  | 5.2705515   | 5.29733925  |
| "1700054N08Rik" | 2.3149965   | 2.4277725   | 2.3381636   | 2.466946    | 2.3429005   | 2.2938726   | 2.337527    | 2.4018316   |
| "1700054O13Rik" | 2.2909403   | 2.3857658   | 2.3258467   | 2.4194589   | 2.3287344   | 2.2939584   | 2.3250904   | 2.4128048   |
| "1700065I17Rik" | 2.9110126   | 3.235039    | 2.950842    | 3.0760555   | 2.9506032   | 2.9305286   | 2.94948     | 3.0623536   |
| "1700071K01Rik" | 9.3005385   | 9.1300785   | 9.5980835   | 9.8518745   | 9.577556    | 9.006852    | 9.5553815   | 9.6868775   |
| "1700073E17Rik" | 2.6146445   | 2.7420951   | 2.6877076   | 2.8017473   | 2.6879157   | 2.65940025  | 2.6853102   | 2.76176225  |
| "1700074P13Rik" | 2.3457963   | 2.4644923   | 2.3946757   | 2.5851884   | 2.3984096   | 2.3570626   | 2.395129    | 2.4800978   |
| "1700082M22Rik" | 2.567895    | 2.697838    | 2.823659    | 2.7638772   | 2.5743756   | 2.5790944   | 2.6342103   | 2.7409308   |
| "1700088E04Rik" | 2.9373236   | 3.173791    | 2.8894541   | 3.0022416   | 2.932199    | 2.8549316   | 2.9426482   | 3.1862264   |
| "1700091H14Rik" | 2.066145    | 3.9346464   | 2.6127229   | 2.1042912   | 2.0250568   | 2.0567276   | 2.0716038   | 2.1017246   |
| "1700093K21Rik" | 2.3287768   | 2.4306054   | 2.3691576   | 2.4813194   | 2.3728254   | 2.3193817   | 2.3511844   | 2.4615388   |
| "1700094D03Rik" | 5.1745186   | 5.284381    | 5.1384044   | 5.3043594   | 5.6617284   | 5.520148    | 5.2364564   | 5.379382    |
| "1700094J05Rik" | 2.8971622   | 3.0788956   | 2.953863    | 3.0837708   | 2.9641027   | 2.9074428   | 2.9560542   | 3.065869    |
| "1700097N02Rik" | 2.344346    | 2.4035604   | 2.3711288   | 2.553009    | 2.3626103   | 2.3348017   | 2.3702924   | 2.4525514   |
| "1700102P08Rik" | 2.6646738   | 2.7826777   | 2.6850796   | 2.8200846   | 2.6864223   | 2.6310396   | 2.6784143   | 2.8018863   |
| "1700120B22Rik" | 2.4628258   | 2.5568693   | 2.5143054   | 2.618756    | 2.515702    | 2.4738925   | 2.508171    | 2.6054347   |
| "1700123K08Rik" | 2.8145287   | 2.9627137   | 2.8924565   | 3.0068593   | 2.8875718   | 2.810971    | 2.8586314   | 2.9502144   |
| "1700123O20Rik" | 7.651902    | 7.1332026   | 7.4801416   | 7.3985686   | 7.589397    | 7.682475    | 7.58577     | 7.175997    |
| "1700129C05Rik" | 2.356544    | 2.425133    | 2.3732405   | 2.4545095   | 2.378407    | 2.3339887   | 2.3729239   | 2.447546    |
| "1810006K21Rik" | 2.1309245   | 2.457281    | 2.5898182   | 2.480694    | 2.456637    | 2.574682    | 2.8053517   | 2.444545    |
| "1810008A18Rik" | 5.3405385   | 5.9154773   | 4.752312    | 4.523247    | 5.3693      | 5.720703    | 4.644037    | 4.7575116   |
| "1810009A15Rik" | 8.456391    | 8.478531    | 8.354516    | 8.278306    | 8.358029    | 8.026657    | 9.240143    | 8.008627    |
| "1810009N02Rik" | 3.525199    | 3.5581925   | 3.564299    | 3.5871599   | 3.48518     | 3.593991    | 3.564807    | 3.5866776   |
| "1810011O10Rik" | 8.81194     | 8.006361    | 8.513536    | 8.934601    | 9.457537    | 9.168594    | 8.999107    | 9.262796    |
| "1810014F10Rik" | 7.5118017   | 6.232869    | 7.4107556   | 7.7797995   | 7.3306847   | 6.5729294   | 7.6561303   | 7.597162    |
| "1810019J16Rik" | 3.199795    | 3.5728328   | 3.388774    | 3.5778246   | 3.400552    | 3.261917    | 3.366724    | 3.5123298   |
| "1810019N24Rik" | 2.4703178   | 2.570266    | 2.537073    | 2.6338224   | 2.5358846   | 2.5067706   | 2.5354776   | 2.6185272   |
| "1810020D17Rik" | 10.748547   | 10.895387   | 11.891138   | 11.917027   | 10.673914   | 10.274258   | 11.594344   | 11.641445   |
| "1810021B22Rik" | 2.663369    | 2.631166    | 2.6994352   | 2.7533832   | 2.9638674   | 2.182158    | 3.528029    | 2.7555554   |
| "1810026J23Rik" | 7.4833308   | 7.78502435  | 7.7668635   | 8.1332665   | 7.546494    | 7.773293    | 7.52017215  | 8.03109685  |
| "1810029B16Rik" | 6.8002355   | 7.32464785  | 6.9390977   | 6.87350845  | 6.76575     | 6.69509835  | 6.89407925  | 6.76421365  |
| "1810030J14Rik" | 2.3193614   | 2.4628916   | 2.3749104   | 2.486095    | 2.3768234   | 2.3400612   | 2.3593562   | 2.4742632   |
| "1810030N24Rik" | 9.387815    | 9.476826    | 9.406834    | 9.474428    | 9.302939    | 8.749613    | 9.830507    | 9.329424    |
| "1810030O07Rik" | 4.6729593   | 4.8991638   | 5.1597735   | 5.0986745   | 5.1200106   | 4.91235925  | 4.96585925  | 5.07764235  |
| "1810031K17Rik" | 7.8455772   | 8.60591     | 6.77331     | 6.5601854   | 7.9506545   | 8.657358    | 7.1259837   | 6.8714986   |
| "1810032O08Rik" | 2.7856262   | 2.817283    | 2.7963238   | 2.847019    | 2.8003635   | 2.7754073   | 2.6981268   | 2.891684    |
| "1810035L17Rik" | 10.767466   | 11.201803   | 11.300831   | 11.401831   | 10.949956   | 10.504456   | 11.206406   | 11.2235775  |
| "1810037I17Rik" | 8.50888     | 8.241011    | 8.721954    | 8.537695    | 8.595629    | 8.368778    | 9.028735    | 8.611579    |
| "1810043G02Rik" | 3.9307834   | 3.8091793   | 3.7777323   | 3.76079095  | 4.02481785  | 3.77190505  | 3.8104781   | 3.86461115  |
| "1810044D09Rik" | 6.1841702   | 6.4813676   | 5.636394    | 6.4005523   | 5.980674    | 5.928734    | 6.125535    | 5.859164    |
| "1810046J19Rik" | 9.045171    | 8.599618    | 9.112097    | 8.898834    | 8.718006    | 8.330955    | 9.196384    | 8.933722    |
| "1810048J11Rik" | 2.8203394   | 2.8745992   | 2.8538494   | 3.2944148   | 2.886453    | 2.8389654   | 3.1105478   | 2.8577225   |
| "1810049H13Rik" | 7.2562203   | 7.077986    | 6.7671876   | 7.1049976   | 7.157969    | 6.4758244   | 7.013232    | 6.9673014   |
| "1810055G02Rik" | 7.275446    | 6.273464    | 6.3456035   | 6.129137    | 5.1947556   | 5.0165615   | 5.707774    | 5.795892    |
| "1810058I24Rik" | 10.490892   | 9.945326    | 10.070432   | 9.715159    | 10.421345   | 10.180564   | 10.603284   | 9.688082    |
| "1810063B05Rik" | 6.49241015  | 6.26627935  | 7.21171575  | 7.1350398   | 6.4919345   | 5.941113    | 6.953012    | 7.21822975  |
| "1810063B07Rik" | 7.1576886   | 6.9034505   | 6.175893    | 6.8354406   | 6.4578104   | 6.81612     | 6.864207    | 6.504896    |
| "1810065E05Rik" | 2.644168    | 2.679233    | 2.6539629   | 2.7610912   | 2.653712    | 2.6353874   | 2.6511087   | 2.7266896   |

|                 |             |             |             |             |             |             |             |             |
|-----------------|-------------|-------------|-------------|-------------|-------------|-------------|-------------|-------------|
| "2-Mar"         | 8.7658205   | 8.899829    | 9.30586     | 9.269926    | 8.907322    | 8.97797     | 9.160151    | 9.167744    |
| "2-Sep"         | 5.816571    | 6.00688715  | 6.1337282   | 5.9560332   | 6.01601135  | 6.07703235  | 5.9592184   | 6.0758323   |
| "2010001E11Rik" | 4.976795    | 2.6823843   | 3.0079553   | 3.6025615   | 3.2924113   | 3.2236335   | 3.194621    | 3.2910566   |
| "2010001M06Rik" | 2.85082     | 3.2378738   | 2.9094424   | 2.9791815   | 2.8811364   | 2.9137456   | 3.1814158   | 3.0224771   |
| "2010003K11Rik" | 2.5597095   | 2.6250374   | 2.5336542   | 2.6643054   | 2.572892    | 2.483652    | 2.5647256   | 2.6135104   |
| "2010003O02Rik" | 9.287407    | 9.333019    | 9.714546    | 9.723609    | 9.105822    | 9.089845    | 9.710769    | 9.35568     |
| "2010005H15Rik" | 2.788642    | 3.01094     | 2.8595748   | 3.0353155   | 2.8695235   | 2.7891574   | 2.8534253   | 3.001597    |
| "2010010I01Rik" | 2.670767    | 2.8399162   | 2.7727427   | 2.8486087   | 2.7719727   | 2.7202742   | 2.755476    | 2.8566165   |
| "2010011120Rik" | 5.164854867 | 4.600353233 | 4.5023747   | 4.606089333 | 4.575635767 | 4.4046789   | 4.451108367 | 4.436950567 |
| "2010012O05Rik" | 7.702878    | 8.025715    | 7.661502    | 7.9932575   | 7.753387    | 7.71283     | 8.0006695   | 8.047729    |
| "2010106E10Rik" | 2.620877    | 2.7661438   | 2.6952558   | 2.8366075   | 2.7057106   | 2.6304858   | 2.7070177   | 2.815985    |
| "2010106G01Rik" | 8.614366667 | 7.99988     | 8.357406    | 8.618641167 | 8.0181311   | 7.893716267 | 8.207589333 | 8.553767167 |
| "2010107E04Rik" | 11.936409   | 11.916638   | 12.373851   | 12.770689   | 12.126051   | 11.720415   | 12.142992   | 12.695488   |
| "2010107G23Rik" | 3.0373757   | 3.7130847   | 4.025982    | 3.7488358   | 3.6989305   | 3.6594214   | 3.8200314   | 4.435106    |
| "2010109K11Rik" | 7.358452    | 7.7227917   | 6.8980246   | 6.923962    | 7.902205    | 8.379511    | 7.2965994   | 7.4212027   |
| "2010111I01Rik" | 7.6197483   | 8.69784225  | 6.7644032   | 7.2712777   | 7.42552985  | 7.95450735  | 6.9376452   | 6.903426    |
| "2010204K13Rik" | 3.060062    | 3.3681977   | 4.052983    | 3.4034786   | 3.326682    | 3.3938856   | 3.3088884   | 3.4138665   |
| "2010305A19Rik" | 7.513303    | 7.496559    | 7.6666417   | 8.098514    | 7.5290318   | 6.8978424   | 7.0971875   | 7.5795755   |
| "2010321M09Rik" | 7.2910705   | 7.861411    | 7.754373    | 7.699963    | 7.446921    | 7.4417396   | 7.41358     | 7.6360164   |
| "2210010C04Rik" | 4.870601933 | 3.162260533 | 2.802932267 | 2.8909766   | 2.7934834   | 2.764808733 | 2.789667467 | 2.882147    |
| "2210012G02Rik" | 4.298484    | 5.1700864   | 3.5494173   | 4.116213    | 4.848852    | 4.839911    | 4.1577787   | 3.6746576   |
| "2210016F16Rik" | 4.8688823   | 4.309016    | 4.7557956   | 4.5386647   | 4.7944085   | 4.7207429   | 5.47917415  | 4.5395032   |
| "2210016L21Rik" | 5.697955    | 6.657895    | 6.5327725   | 6.682789    | 6.154813    | 5.891299    | 5.802718    | 6.0362077   |
| "2210018M11Rik" | 7.21861     | 7.5045333   | 7.088994    | 7.1273766   | 7.319162    | 7.527529    | 6.814892    | 7.012789    |
| "2210021J22Rik" | 7.224964    | 7.523216    | 6.581302    | 6.8896885   | 6.868943    | 6.894369    | 6.930613    | 6.666169    |
| "2210407C18Rik" | 2.5690126   | 2.6660028   | 2.6509845   | 2.722529    | 2.6481469   | 2.6097064   | 2.6476927   | 2.7291155   |
| "2210409E12Rik" | 2.72500555  | 2.9259461   | 2.81345     | 2.98732965  | 2.81989865  | 2.8348445   | 2.8012109   | 2.94513915  |
| "2210418O10Rik" | 3.5348768   | 3.747883    | 3.658027    | 3.8745713   | 3.6542797   | 3.6354294   | 3.6197033   | 3.957227    |
| "2310001A20Rik" | 6.1963663   | 6.15995365  | 6.48695305  | 6.31441985  | 6.7999503   | 7.7202389   | 6.660456    | 6.3958154   |
| "2310002J15Rik" | 2.260451    | 2.3595464   | 2.4142444   | 2.329767    | 2.2932167   | 2.2886732   | 2.2831366   | 2.3292618   |
| "2310003F16Rik" | 6.4583781   | 6.81561835  | 7.0255014   | 7.35873565  | 6.8329456   | 6.5531504   | 7.1222869   | 7.2702515   |
| "2310003L22Rik" | 8.095348    | 8.67556     | 9.033552    | 9.099115    | 8.724985    | 8.152956    | 8.508611    | 9.181259    |
| "2310004I24Rik" | 6.754501    | 7.53161     | 6.061332    | 6.2596636   | 7.4968777   | 8.459125    | 6.797667    | 6.533782    |
| "2310004N24Rik" | 6.765554    | 6.4065895   | 7.0331836   | 7.1187906   | 6.562963    | 5.699928    | 6.610302    | 7.0844517   |
| "2310008H04Rik" | 5.6017375   | 6.7389703   | 2.154195    | 2.9944642   | 4.7741942   | 5.9988093   | 3.6619194   | 3.37071     |
| "2310008H09Rik" | 4.79932665  | 5.4176803   | 5.2303779   | 5.52421215  | 5.32731415  | 5.4858558   | 5.2888795   | 5.22729175  |
| "2310010I17Rik" | 5.593102    | 5.640909    | 5.434597    | 5.479439    | 5.1676054   | 5.4150763   | 6.4571834   | 5.166687    |
| "2310011J03Rik" | 5.3241343   | 5.368744    | 5.0260525   | 4.9269776   | 5.0533037   | 5.0525465   | 5.102359    | 4.9520383   |
| "2310014L17Rik" | 3.0931299   | 2.5009327   | 2.4438488   | 2.5019228   | 2.3364735   | 2.3987975   | 2.4440393   | 2.5014274   |
| "2310016M24Rik" | 11.114864   | 11.168224   | 11.477293   | 11.519722   | 11.245969   | 10.901926   | 11.495659   | 11.34682    |
| "2310022A10Rik" | 7.5510993   | 8.029892    | 7.8344717   | 7.964719    | 7.5902247   | 6.823731    | 7.850178    | 7.7709575   |
| "2310030G06Rik" | 6.645548    | 4.0175114   | 4.063441    | 4.84165     | 6.5300574   | 3.4840157   | 5.9017286   | 4.8294096   |
| "2310031A07Rik" | 2.5154023   | 2.570836    | 2.5479794   | 2.651956    | 2.545899    | 2.4935052   | 2.5295916   | 2.629828    |
| "2310033P09Rik" | 3.4307308   | 3.4379494   | 3.362013    | 3.6762815   | 3.407296    | 3.4343507   | 3.7382038   | 4.003178    |
| "2310034C09Rik" | 2.8294594   | 3.0547202   | 2.967376    | 3.1016362   | 2.9657552   | 2.8599002   | 2.9630017   | 3.0508842   |
| "2310035K24Rik" | 5.02881885  | 4.0998447   | 3.9405891   | 3.9926989   | 4.29193045  | 3.9299757   | 4.0855668   | 4.05963385  |
| "2310036Q22Rik" | 8.924284    | 9.514393    | 8.958335    | 9.106655    | 8.918558    | 9.35773     | 9.057073    | 8.958844    |
| "2310039H08Rik" | 10.363918   | 10.424488   | 10.368385   | 10.21508    | 10.230619   | 10.018588   | 10.599442   | 9.847078    |
| "2310044G17Rik" | 6.788656733 | 7.425031667 | 6.515731967 | 6.924524133 | 6.782386533 | 6.850492933 | 7.079305667 | 6.792669    |
| "2310044H10Rik" | 7.383036    | 6.5076613   | 7.620294    | 7.35042     | 7.416188    | 7.2125154   | 7.119887    | 7.150954    |
| "2310047B19Rik" | 2.3289263   | 2.3356001   | 2.323552    | 2.3727648   | 2.3318827   | 2.2930608   | 2.4423933   | 2.361852    |
| "2310050C09Rik" | 1.9365821   | 1.9662068   | 3.3366506   | 2.0094707   | 1.9491807   | 1.9222671   | 1.9449191   | 2.0105913   |
| "2310057J18Rik" | 2.5291026   | 2.6238241   | 2.5588026   | 2.690212    | 2.5613894   | 2.5244079   | 2.556942    | 2.6463704   |
| "2310061C15Rik" | 6.5957361   | 6.325920067 | 7.0471424   | 7.457571    | 6.684132067 | 6.264291833 | 7.0537275   | 7.258742    |
| "2310061I04Rik" | 9.120921    | 9.416279    | 9.508939    | 9.975375    | 9.4836795   | 8.9442325   | 9.5528725   | 9.8782775   |
| "2310061J03Rik" | 3.0067933   | 3.052629    | 2.743146    | 2.276723    | 3.2485647   | 3.8204432   | 3.0050528   | 3.0397847   |
| "2310067B10Rik" | 4.671041    | 4.673183    | 5.552216    | 6.35414     | 4.714461    | 4.452984    | 5.99718     | 6.167158    |
| "2310075K07Rik" | 5.429049    | 5.1839995   | 5.441832    | 5.3234196   | 4.9892599   | 4.4674835   | 5.9187098   | 5.278988    |
| "2400001E08Rik" | 8.739562133 | 8.637323333 | 8.951715667 | 8.991668667 | 8.5208897   | 8.3635099   | 9.171328    | 8.936408833 |
| "2400003C14Rik" | 8.484699    | 8.940262    | 8.1502055   | 8.3063995   | 8.4593425   | 8.95386025  | 8.20734     | 8.3152945   |
| "2410001C21Rik" | 7.1147445   | 7.4980162   | 6.8847427   | 7.01560175  | 7.32601725  | 7.3923235   | 7.0683785   | 6.7796996   |
| "2410002F23Rik" | 5.9504175   | 7.123553    | 6.481864    | 6.3164854   | 6.5609097   | 6.4911118   | 5.9537826   | 6.7310658   |
| "2410002O22Rik" | 4.9852076   | 2.9491022   | 5.52948     | 6.191395    | 4.591674    | 5.138325    | 5.524223    | 5.4076943   |
| "2410004B18Rik" | 8.835894    | 9.322972    | 9.166925    | 9.514327    | 8.922172    | 9.018529    | 9.2366705   | 9.191961    |
| "2410015M20Rik" | 6.64237365  | 6.5573988   | 6.80096225  | 6.90796695  | 6.7262805   | 6.46326625  | 6.88573785  | 6.7833791   |
| "2410016O06Rik" | 6.1009536   | 7.3081083   | 4.8080482   | 4.920474    | 6.0885944   | 6.543975    | 5.147154    | 5.1684923   |
| "2410017P09Rik" | 7.9231396   | 7.5058765   | 7.513221    | 7.59641     | 7.3462114   | 7.421279    | 8.007517    | 7.7564306   |
| "2410018L13Rik" | 2.501845    | 2.5569642   | 2.26366     | 2.6062517   | 2.526473    | 2.4893012   | 2.5201912   | 2.6058598   |
| "2410018M08Rik" | 12.077238   | 12.261114   | 12.178833   | 12.358339   | 12.26611    | 12.016002   | 12.195121   | 12.169766   |
| "2410022L05Rik" | 4.3150069   | 3.8575576   | 4.821909367 | 5.075078067 | 4.4844234   | 3.731501033 | 5.331056    | 5.0652689   |
| "2410042D21Rik" | 5.2259417   | 5.467719    | 5.4317355   | 5.092934    | 5.6069574   | 5.54991     | 5.4383097   | 5.4892783   |
| "2410075B13Rik" | 2.2492807   | 2.397095    | 2.3767955   | 2.449905    | 2.3739703   | 2.3410485   | 2.3953109   | 2.4371517   |
| "2410091C18Rik" | 6.228256    | 6.7084455   | 6.743443    | 7.1278524   | 6.764635    | 6.1046877   | 6.477565    | 7.0105495   |
| "2410133F24Rik" | 2.681324    | 2.8453074   | 2.7614121   | 2.922156    | 2.7776256   | 2.694071    | 2.7730289   | 2.8958955   |
| "2500003M10Rik" | 9.0422625   | 9.229043    | 9.399702    | 9.51329125  | 9.031797    | 9.1465445   | 9.3466005   | 9.554013    |
| "2510002D24Rik" | 7.0191927   | 7.370701    | 7.367807    | 7.7176313   | 7.3591075   | 7.0337443   | 7.1141243   | 7.3310905   |
| "2510009E07Rik" | 7.1515527   | 6.6675367   | 8.444101    | 8.57122     | 7.664167    | 6.9005747   | 8.168493    | 8.473124    |
| "2510039O18Rik" | 7.3015528   | 7.7287013   | 6.9014863   | 7.7087622   | 7.4461208   | 7.27013755  | 6.8486757   | 7.6050815   |
| "2600001M11Rik" | 2.344324    | 2.381363    | 2.756688    | 2.430406    | 2.37526     | 2.3461342   | 2.821268    | 2.4288192   |
| "2610001J05Rik" | 5.6875215   | 5.91304335  | 6.08481865  | 6.1937774   | 5.8939281   | 5.691458    | 6.0999505   | 6.2641481   |
| "2610002J02Rik" | 3.715572967 | 3.033511933 | 3.724242    | 2.6976123   | 3.7430753   | 4.147608967 | 3.972702867 | 3.062604733 |

|                 |             |             |             |             |             |             |             |             |
|-----------------|-------------|-------------|-------------|-------------|-------------|-------------|-------------|-------------|
| "2610002M06Rik" | 3.0559237   | 3.0358267   | 3.2391784   | 2.9401133   | 3.1032763   | 3.0084577   | 2.809752    | 2.8527164   |
| "2610005L07Rik" | 5.277687    | 5.963847    | 5.26979433  | 5.188462833 | 5.397632333 | 5.510206    | 5.2739012   | 5.2363036   |
| "2610018G03Rik" | 3.1107301   | 3.486222    | 4.1321689   | 3.72206675  | 3.45033695  | 4.09907525  | 2.72066465  | 3.370836    |
| "2610019E17Rik" | 2.8002527   | 2.945204    | 2.886717    | 2.99756     | 2.9028816   | 2.8628058   | 2.8886807   | 2.9723895   |
| "2610019F03Rik" | 5.365581    | 7.0411396   | 6.810248    | 6.9574327   | 7.4387293   | 7.1326056   | 7.0061865   | 6.6750436   |
| "2610020H08Rik" | 2.6459074   | 2.8139791   | 2.746644    | 2.9047844   | 2.748004    | 2.6556544   | 2.7424562   | 2.8384974   |
| "2610027L16Rik" | 6.435838    | 7.091576    | 6.159191    | 6.6049385   | 6.681601    | 6.898977    | 6.3427815   | 6.420063    |
| "2610029G23Rik" | 7.640753    | 7.418175    | 7.5721283   | 6.9899626   | 7.4487066   | 7.39879     | 7.652181    | 6.9743094   |
| "2610039C10Rik" | 4.0236344   | 4.01317515  | 3.9758693   | 4.0456679   | 4.3225373   | 4.58189155  | 3.9573795   | 4.1124143   |
| "2610042L04Rik" | 2.608448    | 2.658821    | 2.681166    | 2.7590446   | 2.617837    | 2.5386357   | 2.6163101   | 2.6755776   |
| "2610101N10Rik" | 7.857316    | 8.5606305   | 7.77396415  | 8.00272225  | 8.0676297   | 8.3153045   | 7.9047547   | 7.893586    |
| "2610201A13Rik" | 3.2321029   | 4.365905    | 3.95039655  | 3.8823038   | 3.5499795   | 3.56489835  | 3.4854436   | 3.79328725  |
| "2610301B20Rik" | 5.4488053   | 5.6634946   | 5.0451126   | 5.475886    | 5.7065697   | 5.287961    | 5.2922463   | 5.936315    |
| "2610301G19Rik" | 4.956372    | 5.47231     | 4.9388022   | 4.8566203   | 5.1113043   | 5.356127    | 4.8943057   | 5.006518    |
| "2610507B11Rik" | 8.6584885   | 8.77263275  | 9.3598465   | 9.510127    | 8.8812525   | 8.73075575  | 8.933482    | 9.2826365   |
| "2610528A11Rik" | 2.3363008   | 2.4573631   | 2.3638945   | 2.4533567   | 2.3715181   | 2.3339417   | 2.366537    | 2.4448266   |
| "2700007P21Rik" | 5.7268115   | 6.3961205   | 5.636145    | 6.011761    | 6.2223135   | 5.91072605  | 5.87062435  | 5.94471885  |
| "2700029M09Rik" | 7.291609    | 7.4255486   | 7.972229    | 7.705395    | 7.128067    | 7.4580593   | 8.129832    | 7.950576    |
| "2700050L05Rik" | 6.7886505   | 6.6270294   | 5.6586843   | 6.1216164   | 6.5778494   | 6.6590624   | 5.9952793   | 6.2982407   |
| "2700060E02Rik" | 12.02910633 | 12.18429433 | 12.152576   | 12.24456267 | 11.95393283 | 11.83069133 | 12.46910567 | 12.20678667 |
| "2700062C07Rik" | 3.3472993   | 3.3008304   | 3.087091    | 3.2859013   | 3.3124106   | 3.305284    | 3.285007    | 3.3345807   |
| "2700078E11Rik" | 5.0455276   | 5.29866314  | 5.14057876  | 5.27764574  | 5.0379054   | 5.3276868   | 5.19807312  | 5.2361695   |
| "2700079J08Rik" | 8.780888    | 8.960804    | 8.82397     | 8.2469015   | 8.446904    | 8.591961    | 8.608423    | 8.82525     |
| "2700089E24Rik" | 9.493638    | 9.939815    | 10.2275225  | 10.732855   | 9.688568    | 9.331865    | 9.8074535   | 10.560855   |
| "2700094K13Rik" | 7.795092    | 7.567382    | 8.564743    | 8.233416    | 8.169464    | 8.000132    | 8.460453    | 8.218134    |
| "2700097O09Rik" | 8.040572    | 7.324265    | 7.33027     | 7.4276805   | 7.7864995   | 7.108464    | 7.4557242   | 7.5328784   |
| "2700099C18Rik" | 3.2091508   | 3.4889498   | 3.3200104   | 3.5052533   | 3.364122    | 3.2571027   | 3.311121    | 3.4275498   |
| "2810002D19Rik" | 3.910672    | 4.301265    | 5.3699093   | 5.7307725   | 4.0770955   | 4.0137415   | 5.726639    | 5.553072    |
| "2810004N23Rik" | 8.019658    | 7.362199    | 7.6221385   | 7.7216153   | 7.737659    | 7.6806335   | 8.057451    | 7.871697    |
| "2810021B07Rik" | 3.6338086   | 3.317815    | 3.0815396   | 3.1168501   | 3.3386579   | 3.2921078   | 3.2134106   | 2.899407    |
| "2810025M15Rik" | 6.404222    | 6.6994705   | 5.685605    | 5.628674    | 6.558782    | 6.6855206   | 6.5041904   | 5.913406    |
| "2810040C05Rik" | 3.7226124   | 3.99299     | 3.7822344   | 3.987847    | 3.7961981   | 3.6676033   | 3.7506323   | 3.885889    |
| "2810043O03Rik" | 4.5249243   | 4.7688174   | 4.648631    | 4.621752    | 4.567296    | 4.9437537   | 4.7892923   | 4.670184    |
| "2810046L04Rik" | 2.4910417   | 2.1356153   | 2.08883     | 2.1370153   | 2.103183    | 2.0859551   | 2.079843    | 2.122093    |
| "2810055F11Rik" | 3.673952    | 2.8512359   | 4.325081    | 3.5768495   | 5.0242944   | 4.451687    | 5.2072654   | 3.9647894   |
| "2810403A07Rik" | 7.6271086   | 8.452084    | 7.550729    | 7.3800535   | 8.046056    | 8.464397    | 7.5069637   | 7.3999104   |
| "2810405K02Rik" | 10.087683   | 10.516712   | 10.907729   | 11.042058   | 10.58898    | 10.616553   | 10.81126    | 10.764491   |
| "2810407C02Rik" | 10.461205   | 10.674918   | 11.304556   | 11.112095   | 10.835047   | 10.819792   | 10.932306   | 11.180546   |
| "2810408B13Rik" | 3.8882818   | 4.3913155   | 4.1554933   | 4.286319    | 4.1694245   | 3.9730203   | 4.114624    | 4.2260666   |
| "2810408M09Rik" | 3.54619705  | 3.65399225  | 3.55274325  | 3.7345779   | 3.593662    | 3.2389873   | 3.7007575   | 3.6514496   |
| "2810417H13Rik" | 2.84270775  | 2.8920189   | 2.8542352   | 2.91224825  | 2.86039695  | 3.4062923   | 3.2300891   | 2.93936875  |
| "2810422J05Rik" | 14.398921   | 14.42636    | 14.388059   | 14.117023   | 14.348024   | 14.454901   | 14.389189   | 14.086409   |
| "2810422O20Rik" | 4.000526    | 3.453022    | 4.1094832   | 5.03201     | 3.991804    | 3.3589852   | 4.8200736   | 4.906897    |
| "2810428I15Rik" | 9.015336    | 9.437852    | 9.806955    | 9.693361    | 8.83474     | 8.731714    | 9.584193    | 9.529355    |
| "2810432D09Rik" | 9.040707    | 9.669167    | 8.806617    | 8.902762    | 9.028956    | 8.499562    | 8.735437    | 8.770356    |
| "2810453I06Rik" | 7.5688069   | 7.850366    | 7.6930907   | 8.2624323   | 7.656623    | 7.91818885  | 7.8058075   | 8.2036185   |
| "2810474O17Rik" | 7.212799167 | 7.029807733 | 5.593022333 | 5.827083567 | 6.584103    | 6.866164167 | 5.9579454   | 5.868139333 |
| "2900010M23Rik" | 8.823251    | 9.1208844   | 9.347611    | 9.218687    | 8.91738735  | 8.37647775  | 9.29689535  | 9.10879075  |
| "2900011O08Rik" | 2.2863533   | 2.4683175   | 2.542545    | 2.3646479   | 2.3222337   | 2.3642874   | 2.3195972   | 2.4427905   |
| "2900053A13Rik" | 5.5209763   | 5.65504965  | 5.7378368   | 5.8032563   | 5.6421609   | 5.5005928   | 5.7933852   | 5.70863265  |
| "2900064A13Rik" | 10.081928   | 10.284002   | 10.051832   | 9.798439    | 10.148487   | 10.197653   | 10.036246   | 9.754876    |
| "2900092E17Rik" | 5.9778445   | 5.298304933 | 6.0559519   | 6.326729933 | 5.960521833 | 5.854174367 | 6.392640667 | 6.520545567 |
| "2900097C17Rik" | 8.3901503   | 9.769735    | 8.3142274   | 8.589399    | 8.38579185  | 9.023409    | 8.2402258   | 8.38160535  |
| "3-Sep"         | 2.3302107   | 2.3552175   | 2.3454823   | 2.3575542   | 2.343567    | 2.3342142   | 2.340783    | 2.3716087   |
| "3000002C10Rik" | 13.774913   | 14.098944   | 14.232881   | 13.90623    | 13.955133   | 13.968097   | 13.946615   | 13.744671   |
| "3010026O09Rik" | 2.6317582   | 2.6754842   | 2.6642928   | 2.7184901   | 2.6628826   | 2.5244946   | 3.184863    | 2.7016432   |
| "3110001D03Rik" | 10.061504   | 10.03574    | 10.082672   | 10.01742    | 9.991402    | 9.9655285   | 10.106888   | 9.914651    |
| "3110002H16Rik" | 3.93568755  | 3.9205568   | 3.95183065  | 4.13050035  | 3.97046875  | 3.90243385  | 3.9614406   | 3.893415    |
| "3110003A17Rik" | 7.3118973   | 5.552915    | 6.8815255   | 6.556051    | 6.8743734   | 7.956307    | 7.371558    | 6.49059     |
| "3110007F17Rik" | 2.5314016   | 2.6435516   | 2.5850034   | 2.7070744   | 2.5939546   | 2.5565906   | 2.5925636   | 2.7037883   |
| "3110009E18Rik" | 4.8602257   | 5.079592    | 5.7736497   | 5.4487376   | 5.037383    | 4.419205    | 5.2836742   | 5.2062936   |
| "3110040N11Rik" | 4.8977222   | 4.787762    | 5.1503625   | 5.0595083   | 4.9096394   | 4.892568    | 4.909401    | 4.9840446   |
| "3110043O21Rik" | 9.174367    | 7.618389    | 8.011197    | 7.571089    | 8.2415495   | 8.349314    | 8.458889    | 7.848741    |
| "3110053B16Rik" | 2.4155667   | 2.589168    | 2.477241    | 2.6010308   | 2.4490297   | 2.5245848   | 2.4412084   | 2.5428002   |
| "3110056O03Rik" | 5.7732897   | 5.7900906   | 6.063768    | 5.8609576   | 5.7807374   | 5.43761     | 5.956579    | 5.633799    |
| "3110057O12Rik" | 4.09144365  | 2.6674218   | 3.26399485  | 3.4098995   | 3.58742225  | 3.3917445   | 3.29405185  | 3.47862505  |
| "3110070M22Rik" | 2.9694166   | 3.241646    | 3.0871983   | 3.2942512   | 3.0770533   | 3.0210958   | 3.0877614   | 3.233921    |
| "3200002M19Rik" | 7.0711479   | 6.92296035  | 6.99238515  | 7.18936665  | 6.82922485  | 6.52893255  | 7.7425702   | 6.95471335  |
| "3230401D17Rik" | 10.482146   | 11.325353   | 9.209881    | 9.399982    | 10.396619   | 11.322329   | 9.283129    | 9.517415    |
| "3632451O06Rik" | 3.6649492   | 2.71171     | 4.463212    | 3.9145417   | 4.8350983   | 2.9169345   | 4.964971    | 4.021479    |
| "3830403N18Rik" | 2.8061938   | 2.9568527   | 2.8860972   | 3.0170188   | 2.9243817   | 2.8028052   | 2.9092536   | 2.9774892   |
| "3830406C13Rik" | 6.610217    | 6.6318445   | 7.4503126   | 7.052905    | 6.9577293   | 6.932631    | 7.080164    | 7.2773514   |
| "4-Sep"         | 5.83698105  | 5.108922    | 6.55400925  | 6.8871773   | 6.4589575   | 6.03511715  | 6.8484062   | 6.77023675  |
| "4632415L05Rik" | 3.3592868   | 3.50159985  | 3.48803675  | 3.5656117   | 3.4862293   | 3.4679594   | 3.50678345  | 3.74470195  |
| "4632419I22Rik" | 5.43836     | 5.314789    | 6.359585    | 6.2435293   | 5.8978615   | 5.576495    | 6.363596    | 6.0365257   |
| "4632428N05Rik" | 4.3802632   | 3.70950615  | 4.50726475  | 4.48106265  | 5.0565549   | 5.6023998   | 4.532782    | 4.6343172   |
| "4732418C07Rik" | 7.57669     | 7.4493465   | 8.837795    | 8.437734    | 7.6993294   | 7.312086    | 8.573454    | 8.4006815   |
| "4732471D19Rik" | 3.4986586   | 4.135694533 | 3.567496433 | 3.738875267 | 3.677357133 | 3.617493033 | 3.634829333 | 3.8372794   |
| "4833420G11Rik" | 5.5409427   | 6.0581868   | 6.1767527   | 6.44758315  | 5.6612512   | 5.48886315  | 5.7291861   | 5.9534082   |
| "4833420G17Rik" | 6.918876833 | 7.115916433 | 6.0031022   | 6.4462102   | 7.138034333 | 7.167367467 | 6.390663767 | 6.556137267 |
| "4833439L19Rik" | 5.412349467 | 5.707671567 | 5.8525062   | 6.030330233 | 5.549656133 | 5.462367033 | 5.824366833 | 5.938731967 |

|                 |             |             |             |             |             |             |            |             |
|-----------------|-------------|-------------|-------------|-------------|-------------|-------------|------------|-------------|
| "4833441D16Rik" | 5.2584195   | 6.497413    | 4.894604    | 5.148384    | 4.784274    | 5.9926105   | 4.6572037  | 5.01768     |
| "4833442J19Rik" | 8.404499    | 8.764998    | 7.3080244   | 7.310401    | 8.618658    | 8.775565    | 7.4020853  | 7.606163    |
| "4921510H08Rik" | 2.3703704   | 2.4178307   | 2.391598    | 2.46596     | 2.391692    | 2.3663707   | 2.3887596  | 2.461881    |
| "4921517L17Rik" | 2.8608162   | 3.009204    | 2.6100533   | 2.7010543   | 3.0548732   | 2.5413127   | 2.9672446  | 2.6885223   |
| "4921524J17Rik" | 8.442405    | 8.851618    | 8.513887    | 8.537355    | 8.595249    | 8.521894    | 8.753887   | 8.536148    |
| "4921530L21Rik" | 2.699247    | 2.8505158   | 2.7775364   | 2.9283774   | 2.7797036   | 2.7137802   | 2.7680871  | 2.8943884   |
| "4921536K21Rik" | 2.3094447   | 2.3999295   | 2.3284793   | 2.4620624   | 2.3298507   | 2.3048992   | 2.321921   | 2.457361    |
| "4922502D21Rik" | 2.847768    | 3.0744505   | 2.9683986   | 3.110869    | 2.9758964   | 2.9225514   | 2.966792   | 3.0874414   |
| "4930403N07Rik" | 2.4098458   | 2.522788    | 2.4807124   | 2.6583962   | 2.4842544   | 2.411393    | 2.4792328  | 2.5531626   |
| "4930420K17Rik" | 9.128577    | 9.296582    | 8.457669    | 8.315146    | 8.725421    | 9.250302    | 8.41529    | 8.323024    |
| "4930430F08Rik" | 2.9625332   | 3.2299805   | 3.201998    | 3.3471656   | 3.2013848   | 2.756495    | 3.2015533  | 3.9527276   |
| "4930432F04Rik" | 2.4424853   | 2.9367292   | 2.9530098   | 2.990129    | 2.9325674   | 2.8748555   | 3.3005235  | 2.9766767   |
| "4930433N12Rik" | 2.6692302   | 2.7354143   | 2.684169    | 2.83842     | 2.6916795   | 2.6284287   | 2.6833436  | 2.814969    |
| "4930441O14Rik" | 2.3876061   | 2.522344    | 2.4239826   | 2.5834768   | 2.4362984   | 2.3827744   | 2.4230509  | 2.519991    |
| "4930444A02Rik" | 3.6726079   | 3.7664412   | 4.72337295  | 4.32352185  | 3.92901025  | 3.19684625  | 4.57920685 | 4.39408065  |
| "4930453N24Rik" | 5.2566348   | 5.7241887   | 5.55714415  | 5.857799475 | 5.3081111   | 5.454450025 | 5.65995965 | 5.703908525 |
| "4930455C21Rik" | 5.854755    | 5.560871    | 5.8161135   | 6.7837744   | 5.925458    | 5.8408313   | 6.3373528  | 6.5429697   |
| "4930471M23Rik" | 4.414239    | 5.067253    | 4.27159335  | 4.81906775  | 4.1346339   | 4.6025271   | 4.6536205  | 4.7108367   |
| "4930507D05Rik" | 2.42029515  | 2.51405775  | 2.45144025  | 2.5496591   | 2.46233475  | 2.4158884   | 2.4818895  | 2.5422089   |
| "4930520O04Rik" | 2.3358164   | 2.3899026   | 2.352199    | 2.4296217   | 2.353613    | 2.3300717   | 2.3521988  | 2.438753    |
| "4930525F21Rik" | 2.9079595   | 3.1080484   | 2.9992437   | 3.1676304   | 2.990182    | 2.8521438   | 2.9987605  | 3.134208    |
| "4930533N22Rik" | 2.2948265   | 2.3637362   | 2.3194442   | 2.4334872   | 2.3264527   | 2.28691     | 2.321889   | 2.4103422   |
| "4930535I16Rik" | 2.4248857   | 2.4942317   | 2.4244168   | 2.4754019   | 2.4314306   | 2.4169104   | 2.4248092  | 2.447918    |
| "4930547C10Rik" | 2.5395927   | 2.6894007   | 2.599893    | 2.771535    | 2.6080832   | 2.563075    | 2.6027825  | 2.7351124   |
| "4930549C01Rik" | 2.4501603   | 2.7539992   | 2.500377    | 2.6267197   | 2.528103    | 2.4781182   | 2.516531   | 2.6162617   |
| "4930571B16Rik" | 3.1004043   | 3.293509    | 3.1421006   | 3.236927    | 3.143384    | 3.0419579   | 3.1415539  | 3.2116065   |
| "4930579C15Rik" | 2.93792405  | 3.350515    | 3.04082975  | 3.1954849   | 3.0485864   | 2.92349835  | 3.0216812  | 3.15390535  |
| "4931406C07Rik" | 6.6353468   | 4.4208475   | 6.7072203   | 6.13805795  | 7.1384218   | 7.439617    | 7.928812   | 6.697222    |
| "4931408A02Rik" | 2.3658752   | 2.4183424   | 2.40137     | 2.4551888   | 2.4058826   | 2.3888257   | 2.4019177  | 2.4553912   |
| "4931432E15Rik" | 2.78881     | 3.0159287   | 2.92265     | 3.1386235   | 2.895828    | 2.7793183   | 2.8902497  | 3.014988    |
| "4932416H05Rik" | 2.657713    | 2.7586584   | 2.7697115   | 2.8149436   | 2.8198917   | 2.687236    | 2.71839    | 2.7948472   |
| "4932431P20Rik" | 8.522083    | 9.096223    | 9.050614    | 9.602149    | 8.904741    | 8.635242    | 8.993213   | 9.744577    |
| "4932438A13Rik" | 7.906351    | 8.304661    | 8.076973    | 8.594135    | 8.319443    | 8.435083    | 7.728518   | 8.878393    |
| "4933400A11Rik" | 2.7367177   | 2.8979974   | 2.8138661   | 2.9571116   | 2.8104873   | 2.7445397   | 2.793578   | 2.9238918   |
| "4933407C03Rik" | 7.16975875  | 6.465673    | 6.3069866   | 5.8004895   | 6.6511717   | 7.4523725   | 6.2659197  | 6.2127525   |
| "4933411K20Rik" | 4.5838175   | 5.913654    | 4.8182783   | 5.478313    | 5.6674995   | 4.801026    | 5.1278334  | 5.3982677   |
| "4933413G19Rik" | 2.559361    | 2.6697335   | 2.6184733   | 2.7579217   | 2.632194    | 2.5883808   | 2.6256528  | 2.746245    |
| "4933415F23Rik" | 2.2809377   | 2.4670243   | 2.2894814   | 2.3925076   | 2.2904289   | 2.25111976  | 2.2856803  | 2.3672466   |
| "4933417A18Rik" | 2.4859538   | 2.5603209   | 2.5317945   | 2.6280181   | 2.5651875   | 2.4823718   | 2.5164793  | 2.6001904   |
| "4933421I07Rik" | 2.3686178   | 2.4779382   | 2.3877394   | 2.4563124   | 2.3876302   | 2.362108    | 2.373462   | 2.4555273   |
| "4933424B01Rik" | 6.40934755  | 6.72352695  | 6.408474    | 6.47538285  | 6.18092345  | 6.5909572   | 6.5850674  | 6.3390698   |
| "4933425L06Rik" | 2.5326552   | 2.6498365   | 2.593058    | 2.7144485   | 2.5953212   | 2.5376055   | 2.590711   | 2.6905255   |
| "4933426M11Rik" | 8.160194    | 8.642646    | 7.768511    | 8.02606     | 8.3375225   | 8.683825    | 7.9574366  | 8.071108    |
| "4933428G20Rik" | 2.4831605   | 2.6017485   | 2.539628    | 2.647761    | 2.5408034   | 2.5024273   | 2.534223   | 2.6468613   |
| "4933429H19Rik" | 3.1605449   | 3.376911    | 3.162541    | 3.2111683   | 3.178994    | 3.1422951   | 3.0726447  | 3.2119584   |
| "4933434E20Rik" | 8.894359    | 9.3010025   | 9.640288    | 9.8376475   | 9.2055615   | 9.1229695   | 9.419449   | 9.682594    |
| "4933434I20Rik" | 2.45778685  | 2.5659331   | 2.52229785  | 2.6320847   | 2.52649925  | 2.46756855  | 2.5157525  | 2.5829487   |
| "4933436I01Rik" | 2.7070515   | 2.8646579   | 2.7817116   | 2.943278    | 2.7890925   | 2.736095    | 2.7745109  | 2.8989928   |
| "4933439F18Rik" | 4.619427883 | 4.9856937   | 5.610090617 | 6.125687333 | 5.0111655   | 4.987612583 | 5.2819091  | 5.755966917 |
| "5-Mar"         | 9.90510125  | 9.71519525  | 9.8725985   | 10.0781045  | 9.896535    | 10.0298615  | 10.417447  | 9.974887    |
| "5031439G07Rik" | 5.4308596   | 6.2428308   | 6.2325134   | 6.413775    | 5.540432    | 5.8062363   | 5.9145746  | 5.917419    |
| "5033411D12Rik" | 2.8323212   | 2.8900409   | 2.8642268   | 2.9506223   | 2.861143    | 2.8477657   | 2.8608081  | 2.9250433   |
| "5033414D02Rik" | 7.163929    | 7.4025617   | 7.9894223   | 7.751192    | 7.5912294   | 7.569926    | 8.079964   | 7.7047462   |
| "5430417L22Rik" | 3.551356    | 3.7010741   | 3.614621    | 3.7520585   | 3.6834433   | 3.561543    | 3.7871919  | 3.7563882   |
| "5430421N21Rik" | 2.333841    | 2.4262779   | 2.381373    | 2.4785066   | 2.3920398   | 2.3364446   | 2.3806248  | 2.445028    |
| "5430435G22Rik" | 3.62482315  | 3.27258375  | 4.3713083   | 3.3546127   | 3.81308065  | 3.8290071   | 4.28036525 | 3.7763784   |
| "5430437P03Rik" | 8.773367    | 8.783323    | 9.044997    | 8.895974    | 8.464932    | 8.333547    | 9.114947   | 8.728852    |
| "5730403B10Rik" | 7.2224426   | 7.25206385  | 7.4712262   | 7.7020945   | 7.3873227   | 6.9230065   | 7.5655128  | 7.67649365  |
| "5730408K05Rik" | 2.44856     | 2.54277695  | 2.5899858   | 2.49458945  | 2.6240123   | 2.5923651   | 2.4447324  | 2.579865    |
| "5730469M10Rik" | 8.978005    | 8.612048    | 8.789509    | 8.581993    | 10.054498   | 9.813691    | 9.885217   | 9.075828    |
| "5730494M16Rik" | 4.7413864   | 4.4788017   | 5.1872263   | 6.212544    | 4.569524    | 4.3012795   | 5.870739   | 6.1688023   |
| "5730494N06Rik" | 9.65827     | 9.271772    | 10.397312   | 10.463526   | 9.841091    | 9.344265    | 10.5309105 | 10.3358345  |
| "5730528L13Rik" | 4.3160243   | 4.575413    | 4.888674    | 5.6144447   | 5.139785    | 4.778912    | 5.6310835  | 4.919997    |
| "5730559C18Rik" | 2.3935444   | 2.4360015   | 2.5972548   | 2.4705      | 2.4096196   | 2.388425    | 2.4093068  | 2.4588416   |
| "5830411J07Rik" | 3.4093223   | 3.5850995   | 3.4497242   | 3.5231605   | 3.4352932   | 3.396026    | 3.4028459  | 3.5187685   |
| "5830417I10Rik" | 4.3349776   | 4.7483845   | 3.9881425   | 4.705309    | 4.842921    | 4.8641725   | 4.7043266  | 4.425793    |
| "5830433M19Rik" | 4.6748004   | 4.907028    | 4.435525    | 4.944245    | 4.773707    | 4.828283    | 4.693721   | 5.184244    |
| "5930416I19Rik" | 6.2637773   | 6.5842505   | 6.6834702   | 6.6263957   | 6.5968447   | 6.9147935   | 6.914866   | 6.4902105   |
| "6-Mar"         | 11.077526   | 11.508731   | 11.674      | 11.667835   | 11.491574   | 11.45029    | 11.334914  | 11.712364   |
| "6-Sep"         | 2.660672417 | 2.886555333 | 2.912501267 | 2.960528067 | 2.832145767 | 2.831781967 | 2.8410633  | 2.931249483 |
| "6030458C11Rik" | 4.312224    | 4.7830708   | 4.9657559   | 5.06822525  | 4.7113661   | 4.4937013   | 4.9330878  | 4.99543205  |
| "6330406I15Rik" | 6.4921672   | 5.76469685  | 6.8466763   | 6.2019      | 6.25167335  | 6.4689265   | 6.3283675  | 6.78663895  |
| "6330408A02Rik" | 3.7350178   | 4.3197975   | 4.0961394   | 4.4483833   | 4.001868    | 3.727962    | 3.9561481  | 4.1545324   |
| "6330409N04Rik" | 7.8862133   | 8.335377    | 8.738301    | 9.125364    | 8.314395    | 8.552953    | 8.880937   | 8.909015    |
| "6330416G13Rik" | 3.562749    | 3.54954685  | 3.53321885  | 3.6481661   | 3.48249575  | 2.9454565   | 3.97393605 | 3.7199775   |
| "6330509M05Rik" | 3.69175     | 4.106902    | 4.2564096   | 4.564981    | 4.064867    | 4.6099396   | 4.0579753  | 4.346119    |
| "6330578E17Rik" | 8.0145576   | 8.03851215  | 8.46588465  | 8.739037    | 8.07589285  | 7.55815375  | 8.2308767  | 8.32921015  |
| "6430548M08Rik" | 5.45779345  | 6.67576135  | 3.76158685  | 3.27201645  | 5.23404215  | 5.31401575  | 4.2584709  | 3.80178095  |
| "6430706D22Rik" | 4.02888925  | 4.09967805  | 4.69272765  | 4.1352434   | 4.2504779   | 4.49185     | 4.486742   | 4.3540716   |
| "6720456B07Rik" | 9.75909     | 9.459852    | 9.86923875  | 9.832149    | 9.778884    | 9.8407425   | 9.891397   | 9.90649825  |
| "6720456H20Rik" | 3.7617126   | 4.4614644   | 4.4255      | 4.4788847   | 4.4462996   | 4.4037204   | 4.42164    | 4.4934807   |

|                 |             |             |             |             |             |             |             |             |
|-----------------|-------------|-------------|-------------|-------------|-------------|-------------|-------------|-------------|
| "6720475J19Rik" | 6.999899    | 6.9051995   | 7.2070756   | 8.024792    | 7.445374    | 7.001528    | 7.579691    | 8.514174    |
| "6820431F20Rik" | 5.359759    | 6.033981    | 5.3793464   | 5.338438    | 5.3414607   | 5.852542    | 5.3765063   | 5.120663    |
| "7-Mar"         | 9.223838    | 9.8013335   | 8.7951505   | 8.885842    | 9.3045527   | 9.6081885   | 8.5712685   | 8.7911415   |
| "7-Sep"         | 9.8222385   | 10.1386035  | 10.2521175  | 10.420228   | 10.170353   | 10.175922   | 10.283794   | 10.599404   |
| "8-Sep"         | 5.988123    | 5.2986717   | 6.7784796   | 6.3343143   | 6.4523783   | 6.5479546   | 6.807351    | 6.4492826   |
| "8430406I07Rik" | 4.6794224   | 5.536075    | 5.522182    | 5.487879    | 4.6151843   | 4.7499676   | 6.2395387   | 5.472373    |
| "8430410A17Rik" | 5.7982907   | 5.6401606   | 5.4165764   | 5.609497    | 6.2507186   | 6.268324    | 5.6183786   | 5.6091437   |
| "8430410K20Rik" | 7.655299    | 8.885007    | 8.279895    | 8.802722    | 8.393403    | 8.974552    | 8.148129    | 8.829371    |
| "8430419L09Rik" | 3.7857628   | 2.8474152   | 2.8101927   | 2.8674289   | 2.81816505  | 2.7948333   | 2.92007935  | 2.87975345  |
| "9-Mar"         | 2.2984147   | 2.361396    | 2.3244798   | 2.4788532   | 2.3396573   | 2.310457    | 2.3410354   | 2.39357     |
| "9-Sep"         | 6.096432    | 5.550944    | 6.076029    | 6.14672     | 6.097684    | 6.5213723   | 6.200275    | 6.1350203   |
| "9030425E11Rik" | 3.999707    | 4.0602      | 5.750068    | 4.7723091   | 5.0790403   | 4.34081835  | 4.85217405  | 4.9595742   |
| "9030617O03Rik" | 5.2535033   | 5.4604716   | 5.413819    | 6.098863    | 5.1296873   | 5.17974     | 5.6718173   | 5.159881    |
| "9030624J02Rik" | 4.86948735  | 4.9019132   | 4.9836048   | 5.08498785  | 4.9498636   | 4.92634515  | 5.1386636   | 5.013483    |
| "9130004C02Rik" | 3.7354858   | 4.2974296   | 4.261917    | 4.0631895   | 3.9468663   | 3.2869318   | 3.92587     | 4.053207    |
| "9130011J15Rik" | 7.2989675   | 7.99452367  | 7.533676    | 7.547826467 | 7.423248    | 7.403404167 | 7.2935154   | 7.626560167 |
| "9130017N09Rik" | 2.2890942   | 2.418606    | 2.30331     | 2.4988956   | 2.4233825   | 2.26549     | 2.3020437   | 2.4100554   |
| "9130019O22Rik" | 2.8892894   | 3.2335813   | 3.3070679   | 3.1527658   | 3.2123613   | 3.414532    | 3.8526511   | 3.281043    |
| "9130221H12Rik" | 5.4302306   | 6.7064323   | 6.4772964   | 6.3647623   | 6.65009     | 5.998459    | 6.286748    | 6.2553844   |
| "9130401M01Rik" | 7.365201    | 7.1161337   | 7.7768965   | 7.94028     | 6.866314    | 7.0252056   | 7.6922493   | 7.7488174   |
| "9430015G10Rik" | 3.1115534   | 3.330917    | 3.2086015   | 3.343762    | 3.2502267   | 3.206534    | 3.2444263   | 3.3458276   |
| "9430016H08Rik" | 8.922526    | 9.738177    | 8.869705    | 9.094119    | 9.239912    | 9.163299    | 9.0857525   | 9.18649     |
| "9430023L20Rik" | 5.9919167   | 5.8559055   | 6.368821    | 6.84411     | 6.345907    | 6.6041384   | 6.6406493   | 6.612868    |
| "9530002B09Rik" | 2.389552    | 2.4572277   | 2.4103358   | 2.4865825   | 2.4092586   | 2.3831596   | 2.4089963   | 2.4795756   |
| "9530008L14Rik" | 6.1278863   | 2.6521945   | 2.6102903   | 2.727508    | 3.69725     | 4.229852    | 2.677416    | 2.6934872   |
| "9530068E07Rik" | 6.7807368   | 7.2800995   | 6.5726843   | 6.534032    | 6.956102    | 7.37188785  | 6.5138343   | 6.54764125  |
| "9930013L23Rik" | 2.3942318   | 2.4311445   | 2.4100723   | 2.4769912   | 2.4106312   | 2.3868244   | 2.4093332   | 2.4790015   |
| "9930023K05Rik" | 2.398366    | 2.499402    | 2.4346418   | 2.5122514   | 2.4333916   | 2.3943467   | 2.4241028   | 2.5097628   |
| "9930105H17Rik" | 8.42569     | 7.8356643   | 8.784285    | 9.22627     | 8.878241    | 8.664133    | 8.778618    | 9.692381    |
| "A030009H04Rik" | 2.3898546   | 2.45973125  | 2.8520762   | 2.51248665  | 2.41071235  | 2.3863691   | 2.4000603   | 2.4998039   |
| "A130006I12Rik" | 2.5008416   | 2.676472    | 2.546412    | 2.6714315   | 2.5432951   | 2.507764    | 2.545496    | 2.6308708   |
| "A130040M12Rik" | 11.656715   | 9.915828    | 8.988762    | 7.9648476   | 10.912429   | 12.024204   | 9.577067    | 8.682687    |
| "A230006K03Rik" | 2.52819895  | 2.66664005  | 2.59951415  | 2.7241115   | 2.6006413   | 2.54290345  | 2.58993565  | 2.7055693   |
| "A230046K03Rik" | 5.670999467 | 5.663265    | 5.4856901   | 5.491964467 | 5.6242314   | 6.133325133 | 5.4827409   | 5.893103433 |
| "A230050P20Rik" | 3.4975128   | 3.1776636   | 3.277239    | 3.0390635   | 3.5283887   | 3.9745703   | 4.251073    | 3.5065126   |
| "A2Id1"         | 6.9072285   | 6.920184    | 6.7039227   | 7.2635236   | 6.2480025   | 6.7116237   | 5.8904114   | 6.74766     |
| "A330033J07Rik" | 2.4286427   | 2.5003715   | 2.450685    | 2.5971937   | 2.4552536   | 2.4066763   | 2.448086    | 2.5495832   |
| "A330049M08Rik" | 6.952379    | 7.055216    | 6.13536     | 5.1384926   | 7.5485764   | 5.8928127   | 6.48899     | 5.17726     |
| "A430005L14Rik" | 8.25655     | 7.851204    | 8.180248    | 8.470657    | 8.075505    | 7.9735894   | 8.351811    | 8.258518    |
| "A430104N18Rik" | 3.5288234   | 4.4834948   | 4.1562967   | 3.9272609   | 3.8671882   | 3.8558142   | 3.8525898   | 3.5974455   |
| "A4galt"        | 3.1594257   | 3.2683358   | 3.2259686   | 3.2792466   | 3.2234826   | 3.790189    | 3.1806967   | 3.2814538   |
| "A530016L24Rik" | 3.238083    | 3.3695538   | 3.3338256   | 3.4890432   | 4.3035283   | 3.4248693   | 4.5384016   | 3.4186277   |
| "A530005N18Rik" | 3.1449478   | 3.4048054   | 3.2241664   | 3.4375007   | 3.2402444   | 3.1522057   | 3.223462    | 3.3485284   |
| "A630007B06Rik" | 7.275057    | 8.54058     | 7.4435225   | 7.7372484   | 7.6008244   | 7.8799458   | 6.9610963   | 7.579584    |
| "A630038E17Rik" | 2.9675093   | 2.9857938   | 2.977224    | 3.0292826   | 2.9742603   | 3.2363534   | 2.9590669   | 3.0318587   |
| "A630072M18Rik" | 4.3500576   | 5.5453796   | 4.314267    | 4.8628874   | 5.014141    | 5.408406    | 4.3682013   | 4.8458977   |
| "A730098P11Rik" | 12.4003365  | 13.04711325 | 12.93412375 | 12.782723   | 12.78490863 | 13.10535325 | 12.97294625 | 12.80934725 |
| "A830007P12Rik" | 2.6388726   | 2.738329    | 2.727173    | 2.7850673   | 3.2267544   | 4.114088    | 2.79294     | 2.7852967   |
| "A930001N09Rik" | 7.3291648   | 8.3109653   | 6.11251545  | 6.09116225  | 8.086365    | 8.203044    | 6.4019861   | 6.6433685   |
| "AA407107"      | 2.5812783   | 2.6857164   | 2.6347704   | 2.793424    | 2.78163     | 2.6350245   | 2.9520333   | 2.765045    |
| "AA407331"      | 3.25644065  | 3.30953685  | 3.2742129   | 3.35682     | 3.27848875  | 3.23321915  | 3.2562387   | 3.3093326   |
| "AA408650"      | 4.117019    | 4.264047    | 4.350526    | 4.25506     | 4.122733    | 4.5858555   | 3.6851215   | 4.218665    |
| "AA408954"      | 2.3785474   | 2.4437284   | 2.4247043   | 2.535836    | 2.4247043   | 2.3651526   | 2.4256294   | 2.4934597   |
| "AA409749"      | 2.8411539   | 2.86553955  | 2.71966605  | 2.8086414   | 2.73836375  | 2.6197002   | 2.6988528   | 2.82635605  |
| "AA414903"      | 2.6418943   | 2.8035202   | 2.74498     | 2.8727458   | 2.746288    | 2.7175941   | 2.7309809   | 2.8307564   |
| "AA414993"      | 2.6867301   | 2.86270885  | 2.76419845  | 2.90590645  | 2.774366    | 2.69886425  | 2.75498375  | 2.878999    |
| "AA416453"      | 3.2774684   | 3.6754673   | 3.4851372   | 3.5960627   | 3.4856005   | 3.3690486   | 3.4824257   | 3.5308464   |
| "AA511261"      | 2.540035    | 2.6918898   | 2.6170204   | 2.711594    | 2.6278021   | 2.5666428   | 2.6153927   | 2.693755    |
| "AA516738"      | 2.6182058   | 2.7217069   | 2.6856773   | 2.8097146   | 2.692469    | 2.6514215   | 2.6783266   | 2.7380035   |
| "AA517023"      | 2.81712375  | 3.1434505   | 2.94313525  | 3.12183855  | 2.9562433   | 2.84655395  | 2.93890035  | 3.0811411   |
| "AA517545"      | 3.2647765   | 3.6826112   | 3.4915466   | 3.6747904   | 3.4985096   | 3.3892024   | 3.478562    | 3.5925477   |
| "AA517562"      | 2.8640242   | 3.039201    | 2.9417205   | 3.1053257   | 2.9474583   | 2.8820963   | 2.9272957   | 3.0637271   |
| "AA517650"      | 2.401945    | 2.612103    | 2.565548    | 2.677426    | 2.6021996   | 2.498771    | 2.544712    | 2.6513557   |
| "AA517841"      | 2.34516765  | 2.40598765  | 2.3826592   | 2.45919665  | 2.38600995  | 2.3457445   | 2.38322825  | 2.4532411   |
| "AA517858"      | 2.84665765  | 3.09740275  | 2.96326565  | 3.14161945  | 2.97350805  | 2.8710785   | 2.9646117   | 3.0839716   |
| "AA517864"      | 2.4538512   | 2.556161    | 2.5061293   | 2.6207108   | 2.507338    | 2.4649794   | 2.5020947   | 2.60943     |
| "AA522020"      | 2.81673955  | 3.0523909   | 2.92630925  | 3.084174    | 2.93365325  | 2.8480632   | 2.91782815  | 3.02712035  |
| "AA536748"      | 3.038022    | 3.2328367   | 3.0934863   | 3.2338421   | 3.099362    | 2.9789221   | 3.090644    | 3.1821966   |
| "AA672641"      | 2.6443448   | 2.7740679   | 2.6879096   | 2.8399694   | 2.7005816   | 2.6366317   | 2.6864898   | 2.8164086   |
| "AA675344"      | 2.73066245  | 2.83702835  | 2.76734     | 2.8900106   | 2.7777723   | 2.7068654   | 2.7659297   | 2.8710208   |
| "AA960436"      | 3.7917762   | 4.2421327   | 4.1363955   | 4.1363955   | 4.1366196   | 4.139163    | 4.137743    | 4.198635    |
| "Aaas"          | 3.3021588   | 3.3473709   | 2.8405688   | 3.1782703   | 3.3669143   | 3.4007735   | 2.8222127   | 3.383318    |
| "Aacs"          | 3.5529246   | 3.54537925  | 3.6501038   | 2.9810073   | 5.4823335   | 4.8607195   | 5.709213    | 3.1155006   |
| "Aadac"         | 7.798789    | 2.3616683   | 3.4101975   | 2.4146237   | 2.3131454   | 2.2320855   | 2.2901325   | 2.4037673   |
| "Aadat"         | 4.7607827   | 2.4866343   | 2.3749795   | 2.4778018   | 2.3721108   | 2.330964    | 2.3668406   | 2.4793818   |
| "Aagab"         | 4.7861035   | 4.92625135  | 4.8065025   | 5.1415185   | 5.13262435  | 4.7906995   | 4.97003175  | 5.0387543   |
| "Aak1"          | 5.278318533 | 5.477029167 | 5.609248    | 5.6337231   | 5.5155345   | 5.543860333 | 5.7387463   | 5.487926333 |
| "Aamp"          | 8.381526    | 8.586023    | 8.323338    | 8.165658    | 8.289072    | 8.593364    | 8.258259    | 8.033947    |
| "Aars"          | 8.62787925  | 9.057271    | 8.6095645   | 8.6049845   | 8.3412498   | 8.6748945   | 8.1174083   | 8.6395935   |
| "Aarsd1"        | 7.967039    | 8.196304    | 8.290017    | 8.530284    | 8.183326    | 7.7804523   | 8.23226     | 8.361915    |
| "Aass"          | 9.840425    | 2.7998302   | 2.9653552   | 2.8583918   | 2.7074406   | 2.6409094   | 2.6970286   | 2.790022    |

|            |             |             |             |             |             |             |             |             |
|------------|-------------|-------------|-------------|-------------|-------------|-------------|-------------|-------------|
| "Aatf"     | 7.0476627   | 7.8744326   | 7.1237884   | 7.1427107   | 7.457597    | 7.51745     | 7.1149936   | 7.1662207   |
| "Aatk"     | 2.7779717   | 2.818329    | 2.834976    | 2.714393    | 3.1381502   | 2.698349    | 2.9347062   | 2.835008    |
| "AB041803" | 8.570007    | 9.740113    | 6.0634527   | 6.849936    | 9.258894    | 9.407797    | 6.33245     | 6.9728      |
| "AB099516" | 7.4159937   | 7.105118    | 6.9706936   | 6.7066717   | 8.712419    | 8.59048     | 7.6459866   | 6.6930213   |
| "Abat"     | 6.5239105   | 3.9292786   | 3.9813237   | 3.8435545   | 4.3645763   | 3.6526494   | 3.7393117   | 3.8860483   |
| "Abca1"    | 6.6960238   | 6.19446995  | 6.04298175  | 6.0336118   | 6.82031725  | 6.8914693   | 6.6484977   | 6.14429235  |
| "Abca2"    | 2.3882186   | 2.403647    | 2.4019036   | 2.4524443   | 2.398876    | 2.3787267   | 2.4516456   | 2.4483976   |
| "Abca3"    | 4.1024004   | 4.057114833 | 4.125940467 | 3.9691522   | 4.260350633 | 4.530610933 | 4.0913864   | 4.0756857   |
| "Abca4"    | 1.8565183   | 3.555596    | 1.8670897   | 1.916144    | 1.8652191   | 1.8480495   | 1.8639503   | 1.9239652   |
| "Abca7"    | 3.3740644   | 3.241202    | 3.0067961   | 3.4901881   | 3.0177267   | 3.5698612   | 3.583558    | 3.4193492   |
| "Abca8a"   | 9.989027    | 9.043501    | 10.0941105  | 10.316153   | 9.969486    | 9.933239    | 10.218252   | 10.349281   |
| "Abca8b"   | 3.9886928   | 3.6460404   | 3.7021253   | 4.0438175   | 3.6997833   | 3.7615259   | 3.7836552   | 4.02811     |
| "Abcb10"   | 5.97960785  | 5.8119215   | 6.1293835   | 6.3559347   | 5.8231215   | 5.5837207   | 6.034381    | 6.21124765  |
| "Abcb11"   | 6.4486194   | 2.0915532   | 2.0849013   | 2.132596    | 2.0739233   | 2.0225832   | 2.0828147   | 2.1303809   |
| "Abcb1a"   | 5.51387325  | 5.8844402   | 5.653353    | 6.25849335  | 6.0463085   | 6.1156776   | 5.7624595   | 6.34023765  |
| "Abcb1b"   | 6.127634    | 6.121415    | 6.0164404   | 6.2256355   | 6.464647    | 6.560861    | 6.57718     | 6.576146    |
| "Abcb4"    | 9.872226    | 10.171155   | 10.563547   | 10.571565   | 9.963306    | 9.673407    | 10.026611   | 10.032221   |
| "Abcb6"    | 8.242878    | 8.321072    | 8.452845    | 8.768326    | 8.156195    | 8.019562    | 8.241814    | 8.397531    |
| "Abcb7"    | 5.686887233 | 5.721619967 | 5.851832567 | 5.9916642   | 5.834030233 | 5.6543308   | 5.7624963   | 6.207385672 |
| "Abcb8"    | 3.1677694   | 3.82711925  | 3.48940655  | 3.932325    | 3.4795351   | 3.4485302   | 3.5199039   | 3.67477145  |
| "Abcb9"    | 2.95906795  | 3.04618265  | 3.2646849   | 3.0973779   | 3.066836    | 2.9354092   | 2.9674365   | 2.9534857   |
| "Abcc1"    | 6.266308    | 7.14655865  | 6.5724177   | 6.6124955   | 6.6000685   | 6.5605368   | 6.82159385  | 6.2669084   |
| "Abcc2"    | 7.2771096   | 2.5616007   | 2.4720867   | 2.6558619   | 2.491483    | 2.4117267   | 2.5073106   | 2.6080363   |
| "Abcc3"    | 7.155351    | 2.759202    | 3.176481    | 2.7559597   | 2.793356    | 2.5552287   | 2.7649012   | 2.7226663   |
| "Abcc5"    | 3.9479158   | 3.654899933 | 3.772031767 | 3.7730281   | 3.787573333 | 3.7673863   | 3.885682517 | 3.9885606   |
| "Abcc8"    | 4.976018    | 6.0863805   | 3.4149184   | 3.4713871   | 3.5287313   | 4.979637    | 3.9541054   | 3.6898072   |
| "Abcc9"    | 8.131847    | 8.410019    | 8.545801    | 8.597346    | 8.404095    | 8.087474    | 8.030535    | 8.842994    |
| "Abcd1"    | 6.2076507   | 6.2399263   | 6.6365447   | 6.3118367   | 6.402704    | 6.2388644   | 6.154417    | 6.2875943   |
| "Abcd2"    | 3.5106382   | 4.4208593   | 7.185007    | 6.7469053   | 6.623994    | 5.456621    | 7.17755     | 6.6699452   |
| "Abcd3"    | 10.444496   | 10.17153    | 10.521587   | 10.574616   | 10.764719   | 10.425368   | 10.483927   | 10.778085   |
| "Abcd4"    | 6.062904    | 4.7468457   | 5.273201    | 5.298663    | 5.0344296   | 5.2034693   | 5.6473494   | 5.4376545   |
| "Abce1"    | 8.20921615  | 8.9318275   | 8.197889    | 8.37417     | 8.32443725  | 8.58848275  | 8.1139497   | 8.372318    |
| "Abcf1"    | 6.235643383 | 6.5154525   | 6.110730767 | 6.270672933 | 6.108851233 | 6.271610483 | 6.321946333 | 6.317194633 |
| "Abcf2"    | 4.95304655  | 5.5028864   | 5.2307398   | 5.34335205  | 5.136713    | 5.03252685  | 5.1624407   | 5.2787714   |
| "Abcf3"    | 4.351303633 | 4.626615867 | 4.3045235   | 4.312012167 | 4.506869267 | 4.555580533 | 4.295034233 | 4.338998967 |
| "Abcg1"    | 5.8441024   | 4.7482843   | 4.7233744   | 4.538342    | 6.7976894   | 8.143523    | 6.6315913   | 4.7706404   |
| "Abcg2"    | 9.646851    | 9.826598    | 9.079455    | 9.386101    | 9.628727    | 9.830496    | 9.804777    | 9.389594    |
| "Abcg3"    | 2.4187078   | 2.5397305   | 2.4511058   | 2.5274367   | 2.4577618   | 2.7100616   | 2.439444    | 2.5695055   |
| "Abcg5"    | 7.0052824   | 2.1845472   | 2.1730745   | 2.2397287   | 2.1588306   | 2.1213286   | 2.1506503   | 2.23174     |
| "Abcg8"    | 4.170147    | 1.827749    | 1.8150709   | 1.8697186   | 1.8164059   | 1.8013278   | 1.8154542   | 1.8622601   |
| "Abhd10"   | 4.9250902   | 5.8066622   | 5.6309918   | 5.5765135   | 5.1384871   | 5.28868365  | 5.29418715  | 6.0011115   |
| "Abhd12"   | 5.4967718   | 5.286265    | 5.280116    | 5.4184882   | 5.61022965  | 5.571298    | 5.7991292   | 5.41616585  |
| "Abhd14a"  | 5.471542    | 5.6983676   | 6.058445    | 5.787239    | 5.7542996   | 5.459744    | 5.7584057   | 5.652817    |
| "Abhd14b"  | 7.6447983   | 5.0814986   | 6.3364806   | 5.5504975   | 6.248907    | 5.3063455   | 6.345469    | 6.298409    |
| "Abhd15"   | 4.3666615   | 4.370092    | 4.362765    | 2.5318038   | 5.6166945   | 7.1740017   | 5.5613627   | 3.9829059   |
| "Abhd16a"  | 8.35243865  | 8.6722065   | 8.806797    | 9.0407195   | 8.29911     | 8.12144515  | 8.8540105   | 8.78158775  |
| "Abhd3"    | 6.9315834   | 3.1111453   | 3.3186903   | 3.333538    | 4.1310964   | 3.4333947   | 3.6955842   | 3.6785889   |
| "Abhd4"    | 8.2798377   | 9.10329265  | 7.6450385   | 7.668005    | 8.848381    | 9.6552955   | 7.812028    | 7.914992    |
| "Abhd5"    | 7.13600445  | 7.5583675   | 7.4566635   | 7.6121743   | 8.027932    | 8.050426    | 7.97145165  | 7.729293    |
| "Abhd6"    | 4.4027072   | 4.91790565  | 3.87842835  | 4.1708739   | 4.34748825  | 4.9546907   | 4.7217148   | 4.28961665  |
| "Abhd8"    | 2.990641    | 2.9629624   | 3.0971127   | 2.916957    | 2.9514308   | 2.9232392   | 3.1914442   | 3.025227    |
| "Abi1"     | 6.5577927   | 7.04822705  | 6.274741925 | 6.474265875 | 6.5819211   | 6.90918685  | 6.29052075  | 6.5235431   |
| "Abi3bp"   | 5.448496    | 5.43459345  | 8.50314525  | 8.0358908   | 6.53562405  | 5.84380675  | 6.34784015  | 8.05869575  |
| "Abi1"     | 7.064284    | 6.841588    | 7.542119    | 7.8802204   | 7.314129    | 6.770482    | 7.474867    | 7.8355503   |
| "Abli1"    | 8.629008    | 8.477305    | 8.45738     | 8.920431    | 9.830246    | 9.489693    | 8.9311695   | 9.054514    |
| "Abpa"     | 2.823116    | 3.0057986   | 2.898566    | 3.0447643   | 2.902318    | 2.8657243   | 2.89876     | 2.975272    |
| "Abpb"     | 2.3547237   | 2.451408    | 2.4020636   | 2.5144215   | 2.4062252   | 2.3461375   | 2.4070868   | 2.4901836   |
| "Abpd"     | 2.8519583   | 3.026962    | 2.9452991   | 3.0523071   | 2.9631014   | 2.9065425   | 2.943788    | 3.0318964   |
| "Abph"     | 2.4655654   | 2.558537    | 2.5447056   | 2.6250334   | 2.524025    | 2.4697442   | 2.542639    | 2.6105778   |
| "Abr"      | 5.9671116   | 5.761043    | 5.4287834   | 5.7674713   | 6.567824    | 6.4604645   | 5.7847853   | 5.9364333   |
| "Abt1"     | 8.058983    | 8.805157    | 7.1985106   | 7.294865    | 8.088138    | 8.2244835   | 7.3847866   | 7.34295     |
| "Abtb1"    | 4.3858595   | 5.4399667   | 4.3528924   | 4.3973203   | 4.550858    | 4.867256    | 3.8110867   | 4.397077    |
| "Acaa1a"   | 8.188932867 | 6.4669968   | 7.514531733 | 7.834242333 | 7.393896333 | 6.940805    | 7.481061    | 7.893001567 |
| "Acaa1b"   | 7.451222    | 2.8086176   | 3.982109    | 2.4005237   | 5.327341    | 2.8962612   | 3.413872    | 4.124197    |
| "Acaa2"    | 10.22661067 | 8.927833167 | 9.804535667 | 10.03060283 | 10.29685533 | 9.2073782   | 9.7441915   | 10.61810433 |
| "Acacb"    | 9.482801    | 10.2354965  | 8.923098    | 9.135378    | 9.935266    | 9.999817    | 9.0754795   | 9.217943    |
| "Acad10"   | 3.3142028   | 3.1477392   | 3.320004    | 3.026307    | 3.5394645   | 3.1458902   | 3.9026213   | 3.374874    |
| "Acad11"   | 9.27625325  | 8.309677    | 8.782256    | 8.7167575   | 9.428573    | 9.111487    | 8.92094975  | 8.9421215   |
| "Acad8"    | 6.1279388   | 6.39322215  | 6.224737    | 6.4794483   | 6.34634035  | 6.045741    | 6.3642983   | 6.6566715   |
| "Acad9"    | 5.1711855   | 5.47046765  | 5.46700715  | 5.99298735  | 5.2916722   | 5.17151565  | 5.526289    | 5.70542095  |
| "Acad1"    | 7.3717813   | 7.2759551   | 7.23351035  | 7.3799756   | 7.5894505   | 7.53788355  | 7.4601524   | 7.60009215  |
| "Acadm"    | 12.050695   | 11.658703   | 12.253755   | 12.277475   | 12.553153   | 12.030132   | 12.311149   | 12.542468   |
| "Acads"    | 7.222226    | 6.6076393   | 7.4315844   | 7.3525953   | 7.6685033   | 7.125886    | 7.4937696   | 7.6749725   |
| "Acadsb"   | 8.969065    | 8.742485    | 8.995275    | 8.858593    | 9.332083    | 9.395262    | 9.317418    | 9.242681    |
| "Acadvl"   | 11.222459   | 10.828168   | 11.045736   | 11.309205   | 11.7656355  | 11.323638   | 11.1793165  | 11.523738   |
| "Acat1"    | 10.39356167 | 10.38115233 | 10.67705067 | 10.99165333 | 10.95068417 | 10.5068765  | 10.82581633 | 11.10602617 |
| "Acat2"    | 6.94038935  | 4.65172215  | 5.6432655   | 5.56478615  | 5.7130356   | 5.85002615  | 6.81042825  | 5.803173    |
| "Acdb3"    | 4.9792812   | 5.7161146   | 5.231740967 | 5.147610967 | 5.145676133 | 5.362333667 | 5.049788367 | 5.141452633 |
| "Acdb6"    | 5.8951964   | 6.2007025   | 5.9334223   | 6.0509179   | 5.80746635  | 5.83255135  | 6.1425398   | 5.9573669   |
| "Accn5"    | 2.4064004   | 2.4744892   | 2.4443705   | 2.5278957   | 2.446347    | 2.3923967   | 2.4268708   | 2.5223832   |
| "Acd"      | 5.9462085   | 5.9628453   | 6.0439596   | 5.9876986   | 5.978237    | 5.9383154   | 5.9536314   | 5.8761883   |

|          |             |             |             |             |             |             |             |             |
|----------|-------------|-------------|-------------|-------------|-------------|-------------|-------------|-------------|
| "Ace"    | 4.02223315  | 3.92168425  | 4.4748009   | 4.4757154   | 4.6862328   | 4.3639818   | 4.26994825  | 4.31110935  |
| "Ace2"   | 2.57177445  | 2.63096345  | 2.591283    | 2.67562065  | 2.5903367   | 2.560266    | 2.5834011   | 2.6831652   |
| "Acer2"  | 4.1015863   | 4.40653755  | 3.34140215  | 3.49308015  | 4.747251    | 4.893023    | 4.1732136   | 3.73986715  |
| "Ache"   | 3.516079    | 3.5330992   | 3.6911645   | 3.6695867   | 3.3507493   | 3.2351358   | 3.5214806   | 3.5719984   |
| "Acin1"  | 7.7532605   | 7.68497275  | 7.6187389   | 7.66574965  | 7.7312128   | 7.9622646   | 7.8641908   | 7.6713221   |
| "Acly"   | 5.6681215   | 5.04108856  | 5.56663212  | 5.07800752  | 5.33274992  | 5.42940828  | 7.9956125   | 5.35045346  |
| "Acnat2" | 4.6678805   | 2.2395797   | 2.1676946   | 2.2826672   | 2.1739721   | 2.1603634   | 2.165923    | 2.2564135   |
| "Aco1"   | 7.3172353   | 6.41104435  | 7.08038435  | 7.2112885   | 7.30323935  | 6.50913875  | 8.0748816   | 7.2288335   |
| "Aco2"   | 13.0085265  | 13.2769625  | 13.213623   | 13.4505235  | 13.422059   | 13.272479   | 13.1156195  | 13.3369745  |
| "Acot1"  | 6.25605635  | 7.79597075  | 4.68525085  | 4.542689    | 7.238386    | 8.028814    | 4.2282622   | 5.45538285  |
| "Acot10" | 9.826584    | 9.699667    | 9.196314    | 8.769453    | 9.872517    | 9.612644    | 10.058039   | 9.029769    |
| "Acot12" | 5.33019285  | 2.33327915  | 2.29096305  | 2.380095    | 2.2924051   | 2.25862515  | 2.28858315  | 2.3710359   |
| "Acot13" | 10.9184475  | 10.852919   | 11.290744   | 11.408612   | 11.198641   | 10.575486   | 11.181669   | 11.468598   |
| "Acot2"  | 5.654789    | 8.1783495   | 3.9754746   | 4.280447    | 6.361001    | 7.4760094   | 3.3311865   | 4.9050026   |
| "Acot3"  | 2.9353163   | 3.1869829   | 2.9625075   | 3.017329    | 3.0338593   | 2.9056456   | 2.8896556   | 3.0295947   |
| "Acot5"  | 2.3460722   | 2.4384701   | 2.3851645   | 2.4968944   | 2.3900995   | 2.4062767   | 2.3835027   | 2.450072    |
| "Acot6"  | 2.2389661   | 2.2892651   | 2.2518869   | 2.3246352   | 2.4613793   | 2.23287215  | 2.2440057   | 2.31696045  |
| "Acot7"  | 7.0952635   | 7.4915648   | 8.2811782   | 8.871428    | 7.355406    | 7.423125    | 7.2662864   | 8.583325    |
| "Acot8"  | 6.5026793   | 6.54025     | 6.4916315   | 6.766525    | 6.48678     | 6.529204    | 6.348665    | 6.1656013   |
| "Acot9"  | 10.23278    | 10.215948   | 9.66206     | 8.968343    | 10.379257   | 10.011578   | 10.450259   | 9.151343    |
| "Acox1"  | 9.8305115   | 8.8068435   | 8.63590475  | 8.4110975   | 9.4151875   | 9.611222    | 9.1406805   | 8.80656825  |
| "Acox2"  | 6.5082893   | 2.3881567   | 2.380617    | 2.43857     | 2.3758264   | 2.349794    | 2.34004     | 2.4334183   |
| "Acp1"   | 7.90977306  | 8.43031066  | 8.01815636  | 8.2609436   | 7.76231054  | 7.67107146  | 7.97955446  | 8.12553386  |
| "Acp2"   | 5.063829233 | 4.632537667 | 4.850440267 | 4.7150863   | 4.849393333 | 4.863723133 | 4.928420333 | 4.856564333 |
| "Acp5"   | 7.4649167   | 3.6565163   | 4.2679157   | 3.220075    | 6.168165    | 7.1812057   | 7.018784    | 3.5874236   |
| "Acp6"   | 6.03343     | 6.553114    | 7.0148897   | 6.793226    | 6.6848865   | 6.4915934   | 7.2147164   | 7.0834694   |
| "Acpp"   | 2.3400486   | 2.376044    | 2.33941     | 2.4448009   | 2.3435047   | 2.3212724   | 2.3396657   | 2.433387    |
| "Acrbp"  | 3.0445696   | 3.244231    | 3.07923565  | 3.1853168   | 3.0773126   | 3.0528141   | 3.0968264   | 3.1981522   |
| "Acrv1"  | 2.4174833   | 2.5197985   | 2.4829748   | 2.5840123   | 2.4829247   | 2.4432657   | 2.4819944   | 2.5638728   |
| "Acsbg1" | 2.369462    | 2.4473724   | 2.474345    | 2.488699    | 2.4042573   | 2.3916852   | 2.4034007   | 2.4823232   |
| "Acsf3"  | 4.676888    | 4.705168    | 4.7144403   | 4.7488904   | 4.8811426   | 4.5525165   | 4.7952127   | 4.744732    |
| "Acsl1"  | 8.8337012   | 8.7518358   | 8.632875925 | 9.03770875  | 10.15724265 | 9.92333535  | 9.652501325 | 9.27468725  |
| "Acsl4"  | 6.115534433 | 5.372546667 | 6.086589033 | 6.451747733 | 5.711394833 | 5.3482845   | 5.727377567 | 6.189604667 |
| "Acsl5"  | 7.512097    | 5.1367188   | 6.9322696   | 5.64889     | 6.351335    | 7.0560246   | 7.033291    | 6.1650753   |
| "Acsl6"  | 8.801904    | 10.463589   | 9.04603     | 9.54418     | 8.7631855   | 8.525404    | 9.584813    | 9.514421    |
| "Acsm1"  | 6.611679    | 2.1190915   | 2.0924785   | 2.1654856   | 2.0908382   | 2.0584793   | 2.0832746   | 2.1693082   |
| "Acsm2"  | 2.3518521   | 2.4401729   | 2.3990728   | 2.51344555  | 2.40369185  | 2.35804615  | 2.3977687   | 2.487532    |
| "Acsm3"  | 3.3860626   | 2.610472    | 2.545578    | 2.6369913   | 3.571335    | 4.4665704   | 2.834926    | 2.6130078   |
| "Acss1"  | 5.082491    | 5.4956625   | 4.458036567 | 4.355876767 | 5.547916833 | 5.742980233 | 4.6377715   | 4.742633933 |
| "Acss2"  | 7.800151    | 6.448332    | 7.1491477   | 7.5035833   | 7.1060432   | 6.5828145   | 8.3787015   | 7.87744575  |
| "Acta1"  | 15.887776   | 15.89104    | 15.97065    | 15.734326   | 15.922709   | 15.861104   | 15.846174   | 15.806856   |
| "Acta2"  | 10.830322   | 10.288749   | 10.84532    | 10.497418   | 10.648416   | 10.511617   | 10.658441   | 10.353821   |
| "Actb"   | 12.7307656  | 12.6338578  | 13.1195987  | 12.6152268  | 12.7197108  | 13.097976   | 12.9256754  | 12.6684186  |
| "Actc1"  | 13.326392   | 11.756929   | 13.810836   | 12.58287    | 14.303744   | 13.170152   | 12.3464155  | 14.266921   |
| "Actg1"  | 11.927005   | 10.908775   | 12.476584   | 11.810765   | 11.565161   | 12.060842   | 12.115068   | 11.536663   |
| "Actg2"  | 5.1320715   | 4.9988813   | 5.3808026   | 5.199998    | 5.325127    | 5.04449     | 5.023496    | 5.2130857   |
| "Actl6a" | 7.2065982   | 7.8478308   | 7.682456    | 7.7913265   | 7.66369835  | 7.8768055   | 7.4123475   | 7.904181    |
| "Actn1"  | 3.9600084   | 3.894584033 | 4.0075357   | 3.883409567 | 4.075559767 | 4.1518824   | 3.845602167 | 3.903029433 |
| "Actn2"  | 13.073719   | 12.031412   | 11.790184   | 12.247565   | 13.087443   | 12.135733   | 12.644362   | 12.600546   |
| "Actn3"  | 14.927391   | 15.340214   | 15.306258   | 15.061429   | 15.055373   | 15.062974   | 15.203915   | 14.96611    |
| "Actn4"  | 8.242061    | 7.964148    | 8.040831    | 7.62946     | 8.261927    | 8.406513    | 8.240126    | 7.815961    |
| "Actr10" | 7.1713545   | 7.75064965  | 7.79545035  | 7.9423155   | 7.4342145   | 7.41195265  | 7.683583    | 8.0209575   |
| "Actr1a" | 6.1191406   | 6.3089199   | 5.8795517   | 5.9151445   | 6.30570295  | 6.3318207   | 6.2036252   | 5.881491    |
| "Actr1b" | 6.3344869   | 6.40655225  | 6.1147163   | 6.026015    | 6.233665    | 5.9281232   | 6.238544    | 6.23745615  |
| "Actr2"  | 9.8715      | 9.363154    | 9.865027    | 9.403599    | 9.811231    | 10.306847   | 10.009526   | 9.690824    |
| "Actr3"  | 9.183184667 | 9.173972333 | 9.443767667 | 9.3250595   | 9.272582667 | 9.992822667 | 9.584391    | 9.245385333 |
| "Actr6"  | 6.0711837   | 5.582988    | 6.2820096   | 6.858514    | 6.0017595   | 5.7813535   | 6.63945     | 7.0711126   |
| "Actr8"  | 8.433437    | 9.309247    | 8.277225    | 8.285823    | 8.894402    | 8.822817    | 8.544411    | 8.40281     |
| "Actrt2" | 2.3881607   | 2.4615335   | 2.431631    | 2.509459    | 2.4453354   | 2.3988967   | 2.43993     | 2.5100763   |
| "Acvr1"  | 4.9399209   | 4.4606741   | 5.9886381   | 5.7333813   | 5.21301315  | 4.77234415  | 5.254051    | 5.48008075  |
| "Acvr1b" | 9.724246    | 11.649883   | 8.766385    | 8.6778755   | 10.353744   | 10.584032   | 8.754619    | 8.742495    |
| "Acvr1c" | 2.472551    | 2.5636635   | 2.545475    | 2.6302094   | 2.7888734   | 2.5131207   | 2.5415678   | 2.6111283   |
| "Acvr2a" | 7.76199585  | 8.3719383   | 6.79840935  | 7.1055882   | 7.15203955  | 7.41098815  | 7.002257    | 6.97084425  |
| "Acvr2b" | 4.8285103   | 5.339265    | 6.107912    | 6.4631      | 5.995016    | 4.8316693   | 5.554537    | 6.0976434   |
| "Acvrl1" | 3.3819897   | 3.464391    | 3.4254248   | 3.8872032   | 3.70177     | 3.4436822   | 3.4589667   | 4.2532196   |
| "Acy1"   | 4.9077964   | 4.501821    | 4.877294    | 4.242519    | 5.098199    | 4.1660285   | 5.4259996   | 4.305727    |
| "Acy3"   | 2.3119264   | 2.346422    | 2.3192244   | 2.3946002   | 2.3182118   | 2.2789352   | 2.4170828   | 2.3937547   |
| "Acyp1"  | 5.936581267 | 6.1592095   | 6.2490942   | 6.6645426   | 5.979791267 | 6.411550167 | 6.278436233 | 6.5168196   |
| "Acyp2"  | 12.426718   | 12.647502   | 13.275611   | 13.301718   | 12.7285     | 12.391285   | 12.921867   | 13.216863   |
| "Ada"    | 2.3264995   | 2.3795063   | 2.3871567   | 2.449911    | 2.3378925   | 2.5318735   | 2.3556838   | 2.4264426   |
| "Adad1"  | 2.2770038   | 2.418064    | 2.331937    | 2.4807415   | 2.3696861   | 2.3253703   | 2.3644886   | 2.4470465   |
| "Adam10" | 5.503893533 | 5.2166219   | 5.4796286   | 5.444624167 | 5.5191492   | 5.616066133 | 5.529233    | 5.473820567 |
| "Adam11" | 2.545496    | 2.652446    | 2.5995412   | 2.678997    | 2.5943804   | 2.5478714   | 2.579905    | 2.6869583   |
| "Adam12" | 2.777622    | 2.8392966   | 3.0886822   | 2.1669555   | 2.837736    | 2.9836113   | 2.9084413   | 2.835142    |
| "Adam15" | 4.9744964   | 5.004718067 | 4.959808567 | 5.019475767 | 5.2767025   | 5.029026533 | 4.977590567 | 4.966598733 |
| "Adam17" | 4.9642627   | 4.026747167 | 5.224305133 | 4.9432824   | 4.863065067 | 4.9317021   | 5.2751239   | 4.998626533 |
| "Adam18" | 2.4828463   | 2.5059466   | 2.486938    | 2.5534992   | 2.4855523   | 2.4002247   | 2.4843318   | 2.5499814   |
| "Adam19" | 4.7366014   | 4.0830407   | 5.153119    | 4.7470393   | 4.820554    | 5.38038     | 5.5300407   | 4.814783    |
| "Adam1a" | 2.1785934   | 2.3732305   | 2.7302992   | 2.4243329   | 2.3456569   | 2.3459432   | 2.3696768   | 2.4121003   |
| "Adam1b" | 2.3600502   | 2.4518328   | 2.4019628   | 2.5202255   | 2.4241948   | 2.3667557   | 2.4008768   | 2.4926665   |
| "Adam23" | 2.580555    | 2.5911708   | 2.638758    | 2.6336443   | 2.540506    | 2.4828515   | 2.5326555   | 2.6378932   |

|             |             |             |             |             |             |             |             |             |
|-------------|-------------|-------------|-------------|-------------|-------------|-------------|-------------|-------------|
| "Adam24"    | 2.844894    | 3.0667393   | 2.9370842   | 3.0399568   | 2.9542608   | 2.8339713   | 2.9356782   | 3.0116386   |
| "Adam25"    | 2.8592181   | 3.127705    | 2.955861    | 3.144447    | 2.9694598   | 2.8767045   | 2.929711    | 3.0876029   |
| "Adam26a"   | 2.6301043   | 2.743902    | 2.6733308   | 2.7851994   | 2.67548     | 2.613341    | 2.6637313   | 2.7723846   |
| "Adam28"    | 2.3667586   | 2.4716196   | 2.4119546   | 2.5643961   | 2.4220123   | 2.369632    | 2.412889    | 2.5265803   |
| "Adam3"     | 2.3638284   | 2.485738    | 2.4501584   | 2.5393372   | 2.4489005   | 2.4196434   | 2.4448824   | 2.533124    |
| "Adam5"     | 2.6323485   | 2.8148465   | 2.7005436   | 2.8783987   | 2.7022202   | 2.632251    | 2.6887596   | 2.7769866   |
| "Adam7"     | 2.3842773   | 2.473278    | 2.438935    | 2.5290904   | 2.441346    | 2.3847127   | 2.4389646   | 2.5049345   |
| "Adam8"     | 2.8435287   | 2.6483054   | 2.8161492   | 2.8116012   | 2.7598753   | 2.9699209   | 3.7192056   | 2.8392348   |
| "Adam9"     | 9.712948    | 9.725971    | 10.08979    | 10.062303   | 9.855525    | 9.872798    | 9.781952    | 10.210446   |
| "Adamts1"   | 8.236702    | 6.993725    | 9.183792    | 8.746       | 7.1364284   | 7.875601    | 8.398865    | 9.061484    |
| "Adamts15"  | 4.3014507   | 3.1187086   | 2.4224787   | 2.394794    | 3.1914043   | 2.3619096   | 2.3835979   | 2.3963227   |
| "Adamts4"   | 2.36520545  | 2.4419657   | 2.39278315  | 2.4912158   | 2.400341    | 2.38795945  | 2.4024342   | 2.479704    |
| "Adamts5"   | 5.99151805  | 5.9218638   | 6.840681    | 6.4601595   | 6.42961     | 6.7467895   | 5.8419902   | 6.3651505   |
| "Adamts8"   | 2.7665768   | 2.8265395   | 3.7196221   | 2.895883    | 2.7323089   | 2.756353    | 2.696568    | 3.4842787   |
| "Adamtsl4"  | 5.673165    | 4.822131    | 5.572677    | 5.4383817   | 6.6258993   | 4.697905    | 6.154579    | 5.5766597   |
| "Adamtsl5"  | 2.2660801   | 2.0637138   | 2.0691605   | 2.1060615   | 2.3544233   | 2.0509923   | 2.7949104   | 2.1071398   |
| "Adap2"     | 6.64873775  | 6.3426343   | 6.1089273   | 6.15424915  | 6.8417929   | 7.2856436   | 6.30753975  | 6.29462115  |
| "Adar"      | 2.830294    | 2.7701597   | 2.699565    | 2.8146875   | 2.6994102   | 2.912836    | 2.7628322   | 2.767877    |
| "Adarb1"    | 4.519825    | 5.076539    | 4.267342    | 4.24225     | 5.330169    | 5.245994    | 3.5695488   | 4.4602194   |
| "Adat1"     | 2.8271143   | 2.894254    | 2.8167653   | 2.9622076   | 3.4035156   | 2.822854    | 2.7296343   | 2.9431226   |
| "Adat2"     | 2.9386673   | 3.3070555   | 3.157166    | 3.7810235   | 3.6081252   | 3.2605298   | 3.1895266   | 3.3541849   |
| "Adck1"     | 6.103583    | 5.7576056   | 5.9882956   | 6.3109465   | 6.47673     | 5.718835    | 6.1643934   | 6.02787     |
| "Adck2"     | 2.4670744   | 2.4519022   | 2.4771662   | 2.5545373   | 2.4748344   | 2.459241    | 2.3828454   | 2.9911275   |
| "Adck3"     | 10.6939825  | 10.6046955  | 9.862158    | 10.3786065  | 11.0782925  | 10.107116   | 10.341072   | 10.7273055  |
| "Adck4"     | 3.5465117   | 2.85812     | 2.8769376   | 2.9036915   | 2.8755457   | 2.807454    | 3.3422751   | 2.92629     |
| "Adcy2"     | 7.985756    | 8.218899    | 7.4589906   | 7.8076024   | 7.9780912   | 7.321679    | 6.990179    | 7.352743    |
| "Adcy3"     | 3.8471637   | 4.23483965  | 4.4634375   | 4.32613175  | 4.5505495   | 4.715308    | 4.26420805  | 4.28696345  |
| "Adcy4"     | 4.344707    | 4.466267    | 4.327807    | 4.071428    | 4.1676664   | 4.6827354   | 4.3698697   | 4.3602977   |
| "Adcy6"     | 6.813041    | 7.618904    | 7.7750716   | 7.777575    | 7.90526     | 7.735799    | 7.8428025   | 7.799609    |
| "Adcy7"     | 4.08418735  | 2.92309845  | 6.01909425  | 5.3118372   | 4.3557965   | 5.75456     | 4.9199035   | 5.55237825  |
| "Adcy9"     | 7.4417925   | 8.073100333 | 8.1862165   | 8.611444333 | 8.101216167 | 7.9529576   | 7.763539033 | 8.386766    |
| "Adcyap1r1" | 2.3842616   | 2.47476795  | 2.4362828   | 2.52790895  | 2.4362937   | 2.4061861   | 2.42333785  | 2.5238708   |
| "Add1"      | 5.607301533 | 5.574708433 | 5.734763333 | 5.756804333 | 5.700004    | 5.516952067 | 5.950765267 | 5.607718433 |
| "Add2"      | 2.9005394   | 3.00952605  | 2.9817319   | 3.07801075  | 2.94865015  | 2.9486072   | 2.97494555  | 3.04739525  |
| "Add3"      | 5.800962967 | 6.067254167 | 7.3533854   | 6.995233233 | 6.470818067 | 6.635075    | 6.802778767 | 7.063112333 |
| "Adh1"      | 11.51167    | 8.886295    | 9.138005    | 8.941859    | 10.420658   | 10.041834   | 10.126306   | 9.623945    |
| "Adh4"      | 2.879767    | 2.2796886   | 2.2390883   | 2.331982    | 2.2413757   | 2.2073255   | 2.2383718   | 2.3279276   |
| "Adh5"      | 11.339656   | 10.928222   | 10.97671    | 11.024184   | 10.9643345  | 10.973786   | 10.873376   | 11.0611725  |
| "Adh7"      | 2.79296525  | 2.95529255  | 2.7805351   | 2.88862815  | 2.9836663   | 2.7422348   | 2.7574819   | 2.86017955  |
| "Adhfe1"    | 8.227037    | 8.1467735   | 8.83849925  | 8.554038    | 8.95897875  | 8.7880615   | 8.883556    | 9.0637845   |
| "Adi1"      | 7.602956567 | 7.662429233 | 8.268130333 | 8.487726933 | 7.318739067 | 7.133001    | 7.913594667 | 8.167015    |
| "Adig"      | 4.775073    | 5.223609    | 7.0304937   | 4.829918    | 8.652413    | 9.199206    | 9.330647    | 6.9110074   |
| "Adipoq"    | 8.484783    | 9.651186    | 11.932227   | 8.221262    | 13.255893   | 13.522108   | 13.444744   | 10.922628   |
| "Adipor1"   | 9.875303333 | 10.60709283 | 10.2003533  | 10.38468317 | 9.799484    | 9.9982939   | 9.942485567 | 10.21773667 |
| "Adipor2"   | 9.3678      | 9.737596    | 9.202461    | 9.09513     | 9.828344    | 10.115687   | 9.514643    | 9.223407    |
| "Adk"       | 6.760013225 | 5.694603975 | 6.341388625 | 6.473888175 | 6.24658095  | 5.781733575 | 6.115151325 | 6.57658905  |
| "Adm"       | 6.984296    | 6.933284    | 5.4487214   | 5.12177     | 6.3045526   | 6.5702496   | 5.810841    | 5.43044     |
| "Adnp"      | 9.19199     | 9.469179    | 9.878768    | 9.706964    | 10.001965   | 9.908656    | 10.001497   | 9.865401    |
| "Adnp2"     | 4.37521355  | 6.0322416   | 4.38957395  | 4.13939115  | 5.14436655  | 5.914379    | 4.2748408   | 4.21269405  |
| "Adora1"    | 2.9703002   | 3.085381    | 3.0010293   | 3.1474757   | 4.596716    | 3.106058    | 3.3645768   | 3.1536531   |
| "Adora2a"   | 2.5255244   | 2.6876041   | 2.6594308   | 2.9617592   | 2.668267    | 2.96377085  | 2.6643162   | 2.6990691   |
| "Adora2b"   | 3.0616395   | 3.376265    | 3.2146509   | 3.3755777   | 3.2107482   | 3.135469    | 3.1985602   | 3.3420358   |
| "Adpgk"     | 4.60893405  | 4.777347    | 4.4616387   | 4.6403755   | 4.57777715  | 4.5527618   | 4.5756395   | 4.61517585  |
| "Adprh"     | 5.5445068   | 5.6469163   | 5.8442345   | 5.89016465  | 5.6775535   | 5.47955145  | 5.74030115  | 5.78557935  |
| "Adprhl2"   | 4.569079    | 6.0804405   | 4.029863    | 3.6070607   | 5.335725    | 5.4696894   | 3.8215752   | 4.072204    |
| "Adrb1"     | 3.8505695   | 3.6083605   | 3.3817263   | 3.5697122   | 3.391552    | 3.2848082   | 3.436782    | 3.488169    |
| "Adrb2"     | 8.088559    | 9.720422    | 7.7919235   | 8.841937    | 9.194772    | 9.652494    | 8.402546    | 8.708537    |
| "Adrb3"     | 2.1365664   | 2.4819722   | 2.7599416   | 2.5253925   | 4.888602    | 4.9314475   | 6.556928    | 2.8488517   |
| "Adrbk1"    | 5.6981398   | 6.1668291   | 6.27095485  | 6.2827761   | 6.0119728   | 6.391886    | 6.2017715   | 6.18306765  |
| "Adrm1"     | 8.904989    | 9.43305625  | 8.6672755   | 8.8187645   | 8.774981    | 9.109078    | 8.8843355   | 8.67256275  |
| "Adsl"      | 9.5567255   | 9.878702    | 9.894304    | 10.158227   | 9.733678    | 9.46223     | 9.807781    | 9.98278     |
| "Adss"      | 8.030091    | 7.710426    | 7.7480474   | 7.826261    | 7.804892    | 8.081417    | 7.7780957   | 7.7910337   |
| "Adssl1"    | 12.762218   | 12.897966   | 13.490675   | 13.215784   | 12.743862   | 12.193682   | 13.33219    | 12.996451   |
| "Aebp1"     | 7.56664075  | 7.79728415  | 9.674208    | 8.18315815  | 8.377877    | 7.895471    | 8.6673725   | 8.7481185   |
| "Aebp2"     | 6.2308211   | 6.22799185  | 6.01055125  | 6.070691    | 6.07838315  | 6.2301202   | 6.0965945   | 6.03308775  |
| "Aen"       | 5.677109    | 5.6497151   | 5.46521595  | 5.972419    | 5.2037568   | 5.1822065   | 5.48358685  | 5.7242347   |
| "Aes"       | 8.081972    | 8.399427    | 8.687118    | 9.068396    | 8.1735935   | 8.06768     | 8.431713    | 8.935709    |
| "AF067063"  | 2.5982106   | 2.727435    | 2.6610508   | 2.7581725   | 2.7497122   | 2.6048467   | 2.5848086   | 2.736572    |
| "AF251705"  | 5.279684    | 2.9222844   | 2.9271922   | 2.9673328   | 2.8988855   | 3.213789    | 3.629024    | 2.9757774   |
| "AF366264"  | 2.6642873   | 2.7799823   | 2.715191    | 2.8535366   | 2.733508    | 2.6898832   | 2.739231    | 2.8543377   |
| "Aff1"      | 4.560454467 | 5.195808367 | 4.498937533 | 4.439275233 | 4.724728167 | 4.894052833 | 4.406757667 | 4.596279633 |
| "Aff2"      | 2.8403316   | 3.5731354   | 2.8699296   | 3.0154629   | 2.9167662   | 2.8751292   | 2.915964    | 3.0037808   |
| "Aff4"      | 6.781056    | 6.57730065  | 6.7891317   | 6.686418    | 6.73658185  | 6.58843     | 7.20037425  | 6.8239668   |
| "Afg3l1"    | 4.4078225   | 4.40740825  | 4.37014135  | 4.74593135  | 4.11452605  | 4.5160203   | 4.42505645  | 4.5461118   |
| "Afg3l2"    | 8.3708705   | 8.378335    | 8.01424675  | 8.50062675  | 8.47237675  | 8.204861    | 8.26306425  | 8.4859895   |
| "Afrm"      | 8.004603    | 2.34042045  | 2.34635615  | 2.3960744   | 2.3377378   | 2.2958241   | 2.3362932   | 2.39658735  |
| "Afmld"     | 3.0144112   | 3.2164311   | 3.0956445   | 3.2849982   | 3.1002545   | 3.0798597   | 3.0919945   | 3.2391372   |
| "Afp"       | 2.64073745  | 2.78462355  | 2.693433475 | 2.834936275 | 2.69878805  | 2.644934675 | 2.689108525 | 2.803856675 |
| "Aftph"     | 7.3507552   | 7.3824349   | 6.978185    | 7.02875035  | 7.3647487   | 7.52844535  | 7.1484162   | 7.0057604   |
| "Agap1"     | 2.9040222   | 2.9154892   | 3.1431024   | 2.996376    | 2.9512897   | 2.8529599   | 3.0907116   | 3.0001311   |
| "Agap3"     | 5.2060256   | 5.285565    | 5.159937    | 5.4454684   | 5.282203    | 5.261799    | 5.321136    | 5.332322    |

|            |             |             |             |             |             |             |            |             |
|------------|-------------|-------------|-------------|-------------|-------------|-------------|------------|-------------|
| "Agbl3"    | 2.6379274   | 2.8463175   | 2.7079193   | 2.846285    | 2.73173865  | 2.6668272   | 2.77321085 | 2.8271077   |
| "Agbl5"    | 3.508915    | 4.2115164   | 4.1793003   | 4.9244776   | 3.7901685   | 3.686156    | 4.332007   | 5.0812836   |
| "Ager"     | 3.042965    | 3.1617095   | 3.06461     | 3.2881236   | 3.1228025   | 3.0651178   | 3.1156394  | 3.2022529   |
| "Agfg1"    | 6.71278254  | 6.6751942   | 6.84223728  | 6.9353326   | 6.75383606  | 6.7385917   | 6.74442318 | 7.00610176  |
| "Agfg2"    | 4.53582005  | 3.74859655  | 3.3434611   | 3.14917935  | 4.087736    | 4.38340535  | 3.4034598  | 3.1464073   |
| "Aggf1"    | 7.930961    | 8.330168    | 8.052193    | 8.389306    | 8.125376    | 8.204521    | 8.250246   | 8.228546    |
| "Agk"      | 2.8708725   | 2.9878168   | 4.0665812   | 3.0487797   | 2.92711     | 2.967582    | 4.1044064  | 3.1186914   |
| "Agl"      | 10.590258   | 10.9501795  | 10.9418945  | 11.644791   | 10.930168   | 10.6846735  | 10.678979  | 11.6428425  |
| "Agmat"    | 6.4232693   | 2.2306964   | 2.176339    | 2.2571783   | 2.1763945   | 2.1459265   | 2.1797366  | 2.2500734   |
| "Agpat1"   | 4.3096272   | 4.9175335   | 4.93060305  | 5.46896245  | 4.4877242   | 4.45985295  | 5.0358533  | 4.8333342   |
| "Agpat3"   | 8.645248    | 8.4015465   | 7.687956    | 8.263075    | 8.612499    | 8.70012     | 8.7953825  | 8.260542    |
| "Agpat5"   | 3.0607834   | 3.9172697   | 4.12481     | 4.308592    | 3.8868723   | 3.8989344   | 4.672492   | 4.2765207   |
| "Agpat6"   | 3.89003745  | 3.43758605  | 3.4899806   | 3.50714185  | 3.87178875  | 3.79510495  | 3.97979295 | 3.45218     |
| "Agr2"     | 2.8117205   | 3.07319745  | 2.93159075  | 3.08313645  | 2.95328615  | 2.85280775  | 2.91957965 | 3.03912035  |
| "Agrn"     | 5.743156    | 4.923881    | 5.771597    | 6.1720095   | 5.881162    | 5.261094    | 6.276594   | 6.1544003   |
| "Agrp"     | 2.3258724   | 2.38922     | 2.3451807   | 2.4188795   | 2.9205396   | 2.3090832   | 2.3462079  | 2.4136806   |
| "Agt"      | 10.062325   | 5.6188626   | 5.980001    | 3.893917    | 6.791592    | 7.352611    | 6.3806396  | 4.5349765   |
| "Agtpbp1"  | 8.943554    | 9.401791    | 9.53283     | 9.951788    | 9.183495    | 8.907147    | 9.400026   | 9.963593    |
| "Agtr2"    | 2.7466204   | 2.8611321   | 2.7616527   | 2.9288821   | 2.7734463   | 2.714988    | 2.7926261  | 2.8791375   |
| "Agtrap"   | 3.2420664   | 3.8675716   | 3.7649891   | 3.4720266   | 3.6029131   | 3.5824945   | 3.5798333  | 3.4293058   |
| "Agxt"     | 10.048771   | 2.2766469   | 2.2519262   | 2.3508554   | 2.2536442   | 2.2194135   | 2.2497482  | 2.3413875   |
| "Agxt2l2"  | 5.48239415  | 6.07548985  | 5.9243225   | 6.044275    | 5.8196513   | 5.5582552   | 6.142571   | 5.8652896   |
| "Ahctf1"   | 7.08361695  | 6.9016197   | 7.0699175   | 7.152764    | 7.17058185  | 7.2350445   | 7.1555848  | 7.32589815  |
| "Ahcy"     | 12.45592    | 9.577615    | 8.569177    | 8.53436     | 8.6915455   | 9.867935    | 8.500906   | 8.614271    |
| "Ahcy1l"   | 6.886204767 | 6.611523967 | 6.526132167 | 6.468975833 | 6.832636633 | 7.049452733 | 6.5988267  | 6.547115567 |
| "Ahcy12"   | 4.5607374   | 4.602243867 | 4.837620033 | 4.984324333 | 4.930820333 | 4.622236333 | 4.8792581  | 4.830412933 |
| "Ahdcl1"   | 2.3246922   | 2.3466172   | 2.5248325   | 2.4066782   | 2.3343139   | 2.258613    | 2.339261   | 2.4077094   |
| "Ahi1"     | 3.2112541   | 3.2079353   | 3.2129712   | 3.2435722   | 3.2168443   | 3.191886    | 3.2087903  | 3.2391717   |
| "Ahnak"    | 7.46241135  | 8.221125125 | 7.5722495   | 7.16751875  | 7.580507675 | 7.491920075 | 8.0259204  | 7.0075386   |
| "Ahr"      | 4.7275284   | 3.9641677   | 4.3060422   | 4.50570435  | 4.3235011   | 4.68109475  | 4.61904075 | 4.56550265  |
| "Ahsa1"    | 9.936887    | 10.104657   | 9.940547    | 9.87109     | 9.949434    | 10.057477   | 9.839499   | 9.898773    |
| "Ahsa2"    | 7.5962324   | 6.7476554   | 7.818515    | 7.7905464   | 7.306062    | 7.4563823   | 8.02038    | 7.7372622   |
| "Ahsq"     | 11.358475   | 2.5188308   | 5.2087893   | 2.331234    | 3.3535051   | 2.3115127   | 2.239871   | 3.121408    |
| "Ahsq"     | 2.322542    | 2.3773654   | 2.3529992   | 2.4381707   | 2.3700926   | 2.803959    | 2.3639095  | 3.540867    |
| "Ai118078" | 2.498122    | 2.501247    | 2.5083582   | 2.5503068   | 2.4894638   | 2.4293656   | 2.5971243  | 2.539265    |
| "Ai314180" | 10.20001    | 10.824612   | 10.818577   | 10.831739   | 10.570833   | 11.105728   | 10.459719  | 10.705523   |
| "Ai314976" | 7.207079    | 7.491519    | 7.472638    | 7.580417    | 7.484298    | 7.208425    | 7.4724007  | 7.7035384   |
| "Ai316807" | 7.917387    | 7.878832    | 8.461614    | 8.882763    | 8.389446    | 7.44789     | 8.877057   | 8.315475    |
| "Ai317395" | 3.730237    | 3.073179    | 2.9712663   | 3.3395915   | 3.0116756   | 2.939349    | 2.9942722  | 3.0456727   |
| "Ai413582" | 2.8498375   | 2.8363092   | 3.0363245   | 2.6825361   | 2.818724    | 2.9956994   | 2.85735    | 2.9175653   |
| "Ai428936" | 2.9838706   | 2.9952873   | 3.0120271   | 3.1086784   | 2.98038255  | 2.96179975  | 2.99111845 | 3.0623555   |
| "Ai462493" | 8.983423    | 8.847002    | 9.447277    | 9.720739    | 8.888466    | 8.718644    | 9.586814   | 9.319014    |
| "Ai464131" | 7.9249945   | 7.5746946   | 9.282887    | 9.446102    | 8.418675    | 6.787971    | 8.990911   | 9.23983     |
| "Ai503316" | 7.32692325  | 8.6156855   | 7.44454335  | 7.38843215  | 8.1411115   | 8.237398    | 7.6915188  | 7.890074    |
| "Ai504432" | 2.3548098   | 2.4259353   | 2.3912783   | 2.4923446   | 2.394937    | 2.4882598   | 2.4030833  | 2.4730237   |
| "Ai594671" | 2.7781858   | 3.0076756   | 2.863309    | 3.0470307   | 2.8729692   | 2.7930412   | 2.8575401  | 3.00087     |
| "Ai596198" | 2.4774828   | 2.577417    | 2.5437005   | 2.6378567   | 2.5466106   | 2.5141537   | 2.5522432  | 2.62622     |
| "Ai597479" | 7.1820793   | 7.205782    | 7.790974    | 7.9576435   | 7.4615235   | 6.88306     | 7.8406057  | 7.787128    |
| "Ai646383" | 2.389362    | 2.9227839   | 2.4471986   | 2.491961    | 2.818908    | 3.4193435   | 2.4872491  | 2.7468557   |
| "Ai837181" | 6.2873836   | 6.9963565   | 6.300695    | 6.343815    | 6.728092    | 6.742575    | 6.1205807  | 6.113282    |
| "Aicda"    | 2.2933207   | 2.387249    | 2.3459322   | 2.4252706   | 2.3313618   | 2.2912285   | 2.3458078  | 2.4141376   |
| "Aida"     | 6.7265015   | 6.75849055  | 7.11726615  | 7.34989925  | 6.9763108   | 6.9215584   | 7.35484815 | 7.18873385  |
| "Aif1"     | 4.331566    | 3.0687063   | 3.7701998   | 3.4494016   | 3.5565345   | 5.0805297   | 4.8055716  | 3.8094594   |
| "Aif1l"    | 3.780210433 | 3.751230033 | 3.5145419   | 3.460670533 | 3.435582933 | 3.2157334   | 4.3296302  | 3.107609667 |
| "Aifm1"    | 9.215269    | 8.898697    | 9.178112    | 9.598959    | 9.51174     | 8.900923    | 9.2633095  | 9.721043    |
| "Aig1"     | 5.074668    | 4.651764    | 5.3410068   | 5.324432    | 5.1266837   | 4.595714    | 5.1264005  | 5.205475    |
| "Aim1"     | 3.402001    | 2.3183887   | 2.2919757   | 2.3681028   | 2.385904    | 2.3223794   | 2.2913795  | 2.3665822   |
| "Aim2"     | 3.6005187   | 3.83572     | 3.7207277   | 3.9177036   | 3.7406838   | 3.6303577   | 3.7263064  | 3.8427253   |
| "Aimp1"    | 10.494158   | 10.757776   | 10.76104    | 10.859823   | 10.668924   | 10.342708   | 10.69586   | 10.95004    |
| "Aimp2"    | 10.6956885  | 10.9499475  | 11.84540725 | 11.8139295  | 10.5391285  | 10.3822565  | 11.25057   | 11.45375075 |
| "Aip"      | 7.1720214   | 7.2250695   | 7.38569     | 7.5634723   | 7.1311913   | 7.0588317   | 7.2621856  | 7.5317564   |
| "Aipl1"    | 2.8486574   | 3.0104847   | 2.9120378   | 3.0439625   | 2.9169943   | 2.846599    | 2.9107435  | 3.0246425   |
| "Airn"     | 6.0646663   | 6.103651    | 6.813736    | 6.5369754   | 6.0192223   | 6.081323    | 7.31925    | 6.4809084   |
| "AK010878" | 6.6961684   | 6.9309964   | 6.9841967   | 7.244634    | 6.99474     | 6.8467946   | 7.024155   | 6.800966    |
| "Ak1"      | 7.91563575  | 8.284576    | 9.13524225  | 9.06743875  | 7.88669445  | 7.66966885  | 8.3732481  | 9.03556965  |
| "Ak2"      | 7.33792215  | 6.6032803   | 7.4278431   | 6.97153735  | 7.6499457   | 7.5367928   | 8.2772505  | 7.15830935  |
| "Ak3"      | 6.234181233 | 5.394302633 | 6.350351633 | 6.508870833 | 6.094625433 | 5.626469667 | 6.8518466  | 6.302856667 |
| "Ak4"      | 3.222965567 | 2.674606233 | 3.830205333 | 2.634626033 | 3.371048333 | 2.8771045   | 3.4798535  | 3.326116267 |
| "Ak5"      | 2.194032    | 2.2472503   | 2.5195148   | 2.2322924   | 2.2199318   | 2.1907692   | 2.2168367  | 2.2809508   |
| "Akap1"    | 6.7718377   | 6.04901265  | 6.57941175  | 6.77164325  | 6.85538915  | 6.11914515  | 6.5738289  | 7.0518535   |
| "Akap10"   | 2.92392     | 3.1947088   | 2.9748414   | 3.0378232   | 3.068528    | 3.0081632   | 3.024952   | 3.1443639   |
| "Akap12"   | 6.9370384   | 5.2452335   | 7.5892553   | 7.030095    | 7.148663    | 7.1022563   | 7.261243   | 7.2336626   |
| "Akap17b"  | 4.141468    | 4.185209    | 4.1792855   | 4.356277    | 5.0544286   | 3.8662407   | 4.5991426  | 4.1971564   |
| "Akap2"    | 7.5046887   | 6.534528    | 6.3447466   | 7.3701706   | 6.7111497   | 6.8083506   | 6.886034   | 7.0319085   |
| "Akap3"    | 2.2349575   | 2.2858999   | 2.5447478   | 2.4820182   | 2.26977     | 2.2318528   | 2.2647436  | 2.3208637   |
| "Akap4"    | 2.7558423   | 2.8994049   | 2.82666445  | 2.9353087   | 2.8275559   | 2.74572505  | 2.8127085  | 2.90346375  |
| "Akap8"    | 7.8625067   | 8.0708003   | 7.7518745   | 7.95197165  | 8.3061175   | 8.003199    | 7.945277   | 8.0312512   |
| "Akap8l"   | 6.5637736   | 7.926052    | 6.574087    | 6.534339    | 7.6062493   | 7.8245807   | 6.5770807  | 6.715668    |
| "Akap9"    | 8.2864705   | 9.519402    | 8.3033835   | 8.20816085  | 8.5097437   | 9.044564    | 8.073268   | 8.47115035  |
| "Akirin1"  | 8.659257    | 8.7657755   | 8.755072    | 8.8582745   | 8.7098745   | 8.7728195   | 8.674856   | 8.92229025  |
| "Akirin2"  | 10.29933    | 10.627501   | 9.820361    | 9.641065    | 10.647591   | 10.65       | 9.905325   | 9.756945    |

|            |             |             |             |             |             |             |             |             |
|------------|-------------|-------------|-------------|-------------|-------------|-------------|-------------|-------------|
| "Akna"     | 2.97520555  | 2.959164    | 2.91165945  | 3.08762715  | 3.00648685  | 5.6845891   | 3.08029125  | 3.0473522   |
| "Akr1a1"   | 11.357464   | 11.28324563 | 11.44640125 | 11.1891695  | 11.1718875  | 11.13515675 | 11.3745875  | 11.16247325 |
| "Akr1b10"  | 2.7265444   | 2.3644757   | 2.8718659   | 3.2358967   | 2.70123205  | 2.8371179   | 2.73955165  | 2.8360898   |
| "Akr1b3"   | 11.22327667 | 11.38946633 | 11.74069533 | 11.940673   | 11.41206483 | 10.74885    | 11.69115867 | 11.87395    |
| "Akr1b7"   | 2.8857002   | 2.626612    | 2.602743    | 2.6903498   | 2.6021438   | 2.513138    | 2.4316099   | 2.670358    |
| "Akr1b8"   | 5.641678    | 4.9095945   | 5.5262585   | 4.7844105   | 5.5805674   | 4.5160885   | 6.7806077   | 4.4631844   |
| "Akr1c12"  | 5.83355285  | 3.02749265  | 3.04059065  | 3.0838101   | 2.98646215  | 3.2038355   | 2.95109865  | 3.0569215   |
| "Akr1c13"  | 7.325127    | 3.352342    | 3.6274815   | 3.3494182   | 3.6811702   | 3.6696217   | 3.6035466   | 3.3036635   |
| "Akr1c14"  | 6.08436     | 3.2839818   | 3.5493858   | 3.762886    | 3.5520105   | 3.0616      | 3.684972    | 3.6545026   |
| "Akr1c20"  | 4.0070951   | 2.9291099   | 2.84759175  | 2.9810884   | 2.84511995  | 2.80284085  | 2.84061275  | 2.9428173   |
| "Akr1c6"   | 8.064937    | 2.4611895   | 5.349741    | 2.52961     | 2.5766842   | 2.3517551   | 2.5583694   | 2.8232443   |
| "Akr1cl"   | 1.8554868   | 1.891856    | 5.0815463   | 1.949523    | 2.5298815   | 1.8756337   | 1.8875566   | 1.9401808   |
| "Akr1d1"   | 4.3132615   | 2.6648745   | 2.5580512   | 2.70114625  | 2.7244621   | 2.4867928   | 2.5519755   | 2.66106575  |
| "Akr1e1"   | 6.491087    | 6.0984035   | 6.777339    | 7.113542    | 6.693449    | 6.3061686   | 6.7871323   | 6.7362185   |
| "Akr7a5"   | 8.4791915   | 8.2279065   | 8.5074812   | 8.4777448   | 8.28428965  | 7.761679    | 8.56481235  | 8.2853105   |
| "Akt1"     | 6.5776562   | 6.476796    | 5.6719005   | 5.6667435   | 6.0383507   | 6.00501395  | 6.60331125  | 5.60370225  |
| "Akt2"     | 7.47878     | 7.827723    | 7.203379    | 7.14784315  | 7.602599    | 7.3275998   | 7.6092162   | 7.3475553   |
| "Akt3"     | 2.46852     | 2.5518696   | 2.481752    | 2.6087224   | 2.4855542   | 2.4253583   | 2.4806302   | 2.5630112   |
| "Aktip"    | 5.633630333 | 6.089632933 | 6.181468833 | 6.498786133 | 5.973772733 | 5.651115433 | 6.118457333 | 6.5451853   |
| "Alad"     | 7.8816175   | 7.2435384   | 8.019229    | 7.8786626   | 8.098515    | 7.342306    | 8.261309    | 8.041157    |
| "Alas1"    | 8.61522975  | 8.72959485  | 8.70728365  | 9.202143    | 9.1394885   | 8.814615    | 8.68716765  | 8.884962    |
| "Alas2"    | 3.8415449   | 3.9872916   | 3.1936219   | 3.4084141   | 3.8494759   | 4.6741543   | 3.0532334   | 4.53607     |
| "Alb"      | 15.423029   | 4.820199    | 11.91586    | 3.5171123   | 11.291389   | 3.0695987   | 4.30395     | 10.080703   |
| "Alcam"    | 4.80588385  | 3.410588    | 3.4047224   | 3.30033865  | 3.5590101   | 3.346631    | 3.4082922   | 3.41940855  |
| "Aldh16a1" | 5.593525    | 4.173907    | 4.224965    | 4.132394    | 4.3277636   | 4.340946    | 4.595877    | 3.9355412   |
| "Aldh18a1" | 2.7721825   | 2.707959867 | 3.179154233 | 3.034735433 | 2.7641669   | 2.784812467 | 2.999905167 | 3.017618667 |
| "Aldh1a1"  | 10.816024   | 10.437644   | 9.983787    | 10.486747   | 11.379269   | 10.836986   | 9.691973    | 10.642007   |
| "Aldh1a2"  | 2.307102    | 2.3321993   | 2.3462727   | 4.3761005   | 2.2265203   | 2.2102811   | 3.2976372   | 3.9125013   |
| "Aldh1a3"  | 2.6798481   | 2.78420555  | 2.79032575  | 2.8506284   | 2.89062555  | 2.74842675  | 2.69291245  | 2.9118304   |
| "Aldh1a7"  | 8.345961    | 3.3404722   | 5.803031    | 4.3959703   | 6.446469    | 4.1671276   | 7.6919518   | 4.5597363   |
| "Aldh1b1"  | 2.7613163   | 2.2578375   | 2.2420223   | 2.316507    | 2.2234445   | 2.2156305   | 2.2203417   | 2.3007274   |
| "Aldh1l1"  | 6.286759    | 4.5200588   | 4.0543431   | 3.23499845  | 4.75413905  | 5.1708631   | 4.91491635  | 3.8759104   |
| "Aldh2"    | 6.974103667 | 4.866026    | 5.3733672   | 4.938809567 | 5.992631967 | 5.602576    | 6.268158267 | 5.4358069   |
| "Aldh3a1"  | 2.7242587   | 2.7980127   | 2.769219    | 2.8400059   | 2.7664094   | 2.707789    | 2.7607658   | 2.8398855   |
| "Aldh3a2"  | 6.108965    | 5.6291018   | 5.7568684   | 5.115655    | 5.686436    | 5.938058    | 5.717603    | 5.3180585   |
| "Aldh3b1"  | 2.764714    | 2.497503    | 2.476668    | 2.5234168   | 2.460719    | 2.485667    | 2.4993482   | 2.5258038   |
| "Aldh4a1"  | 2.3995974   | 2.3988554   | 2.3924096   | 2.4226317   | 2.3536923   | 2.352434    | 2.352834    | 2.4536219   |
| "Aldh6a1"  | 11.053212   | 10.943278   | 11.004718   | 10.970868   | 11.585335   | 11.277327   | 11.213832   | 11.290186   |
| "Aldh7a1"  | 6.06864565  | 5.22593425  | 5.5556111   | 5.3167245   | 5.3442389   | 5.172564    | 5.56702225  | 5.55806465  |
| "Aldh8a1"  | 6.8864802   | 2.7459016   | 2.35466185  | 2.4605747   | 2.3809106   | 2.72675575  | 2.3314773   | 2.4220612   |
| "Aldh9a1"  | 8.5193727   | 6.69317195  | 7.36299365  | 6.76594735  | 8.087854    | 7.95575365  | 7.769166    | 7.48978675  |
| "Aldoa"    | 15.035919   | 15.26019075 | 15.28163575 | 15.224821   | 15.16428375 | 15.07406675 | 15.28121175 | 15.14018925 |
| "Aldoart1" | 3.089658    | 3.4040017   | 3.2958174   | 3.2941298   | 3.1708548   | 3.085954    | 3.1557505   | 3.2510555   |
| "Aldoart2" | 2.6283545   | 2.7272651   | 2.6617413   | 2.910114    | 2.669174    | 2.6282806   | 2.66872     | 2.8463194   |
| "Aldob"    | 11.318403   | 3.6018064   | 5.850811    | 3.5536184   | 6.3190207   | 3.1989083   | 2.227367    | 4.469203    |
| "Aldoc"    | 2.93573915  | 2.4968312   | 2.4568137   | 2.56252775  | 2.4622213   | 2.4301075   | 2.4571632   | 2.53273725  |
| "Alg1"     | 6.4388895   | 7.3768682   | 6.174639    | 6.14272     | 6.6756983   | 7.121572    | 6.420258    | 6.0981307   |
| "Alg12"    | 2.8280954   | 2.841593    | 2.814306667 | 2.895972333 | 2.7959914   | 2.853325767 | 2.875876933 | 2.812579367 |
| "Alg13"    | 5.159002    | 5.2642837   | 4.842374    | 5.281665    | 4.8444414   | 4.6967196   | 5.1398673   | 5.4776635   |
| "Alg14"    | 4.8504207   | 4.291364533 | 5.1863993   | 5.012571633 | 4.688291933 | 4.6885303   | 5.024595467 | 5.262916533 |
| "Alg2"     | 3.725547    | 3.4504118   | 6.1512403   | 5.710993    | 4.930583    | 4.2412677   | 5.4240904   | 5.4140787   |
| "Alg3"     | 5.033956    | 5.4860764   | 6.2146497   | 5.9980283   | 5.1269264   | 4.4723577   | 5.6128836   | 5.3090153   |
| "Alg5"     | 7.012421    | 6.814448    | 6.7100143   | 6.219433    | 6.7920012   | 6.571905    | 6.9331284   | 6.224912    |
| "Alg9"     | 3.9111483   | 4.071746    | 4.7158813   | 4.3310585   | 4.111725    | 4.4103127   | 5.4184694   | 3.880346    |
| "Alkbh4"   | 3.603695    | 3.5712534   | 3.57988325  | 3.66967955  | 3.6474738   | 3.56603435  | 3.6649425   | 3.72461975  |
| "Alkbh5"   | 8.3675375   | 8.738893    | 8.733074    | 8.797695    | 8.340683    | 8.26077     | 8.685217    | 8.838811    |
| "Alox12e"  | 2.289615    | 2.3648176   | 3.5497887   | 2.4223242   | 2.3190162   | 2.3030193   | 2.3316607   | 2.4083605   |
| "Alox5ap"  | 8.316524    | 6.353652    | 7.9629893   | 6.7862678   | 7.9382863   | 8.30864     | 8.211334    | 6.786374    |
| "Alpk2"    | 7.9158797   | 6.7297664   | 6.214119    | 5.6342173   | 7.366715    | 7.036077    | 6.2195454   | 6.243523    |
| "Alpk3"    | 10.298424   | 10.279749   | 10.288035   | 10.580355   | 10.638721   | 10.100778   | 10.412781   | 10.584198   |
| "Alpl"     | 2.5121415   | 2.60232     | 2.8390403   | 2.652808    | 2.4710097   | 2.5547667   | 2.568526    | 2.9179647   |
| "Als2"     | 6.394489    | 6.318369    | 6.3065853   | 6.479156    | 6.390145    | 6.5745335   | 6.512084    | 6.477485    |
| "Alx3"     | 2.5974135   | 2.691505    | 2.6295843   | 2.7208514   | 2.6355553   | 2.5951452   | 2.6320772   | 2.7150164   |
| "Alyref"   | 8.7390645   | 9.0413135   | 9.0633035   | 9.05543775  | 8.673378    | 9.0692315   | 9.066443    | 8.9270115   |
| "Amac1"    | 2.2092745   | 2.7193475   | 2.3101175   | 2.3190315   | 2.3920488   | 2.2486045   | 2.2658699   | 2.3143976   |
| "Amacr"    | 8.890719    | 7.716847    | 8.589099    | 8.690515    | 8.549088    | 7.644294    | 8.457856    | 8.569092    |
| "Ambn"     | 2.2947335   | 2.3521407   | 2.3258934   | 2.4372897   | 2.325963    | 2.2985778   | 2.3257904   | 2.4254794   |
| "Ambp"     | 12.715095   | 2.1689897   | 5.9772253   | 2.251854    | 3.9439464   | 2.1166573   | 2.1350284   | 3.9157207   |
| "Ambra1"   | 6.8627386   | 7.0484896   | 6.3400426   | 6.4795475   | 6.5681205   | 6.8600645   | 6.4889836   | 6.48576     |
| "Amd1"     | 8.8788665   | 11.231078   | 10.800283   | 13.69584    | 9.256136    | 11.7367445  | 9.954128    | 12.5123645  |
| "Amdhd1"   | 6.6889215   | 2.7179773   | 2.6120608   | 2.7438865   | 2.6192725   | 2.5840194   | 2.6075916   | 2.7275677   |
| "Amelx"    | 2.3637452   | 3.3206558   | 2.3728552   | 2.4323583   | 2.3762577   | 2.3547714   | 2.3790343   | 2.4336023   |
| "Amfr"     | 9.961615    | 9.982517    | 10.331022   | 10.363462   | 9.930855    | 9.6932125   | 9.910663    | 10.386654   |
| "Amhr2"    | 3.2524235   | 4.963691    | 4.323044    | 5.631559    | 4.1712995   | 4.274145    | 4.004701    | 4.5773063   |
| "Amigo1"   | 3.39339     | 3.3089204   | 3.5828142   | 3.7632186   | 3.3107138   | 3.4123766   | 4.2472405   | 3.61986     |
| "Ammecr1"  | 2.6249328   | 2.7265995   | 2.6636322   | 2.7874053   | 2.6702173   | 2.6245837   | 2.657391    | 2.74122     |
| "Ammecr1l" | 6.9006499   | 6.470514433 | 6.243108867 | 5.955561733 | 6.455655    | 6.835872267 | 6.354847833 | 5.991611533 |
| "Amot"     | 6.355301    | 6.9957034   | 6.41625425  | 6.42132705  | 6.83505645  | 6.3960018   | 6.4876865   | 6.2850993   |
| "Amotl2"   | 7.5381427   | 7.354602    | 7.087378    | 6.4772987   | 7.729193    | 7.1742926   | 7.841471    | 7.066791    |
| "Ampd2"    | 3.481588    | 2.91908915  | 4.2608831   | 4.4571094   | 3.5473145   | 3.40336585  | 4.09228275  | 4.05152605  |
| "Ampd3"    | 11.83757    | 12.390875   | 7.992123    | 7.3326225   | 10.866975   | 11.756624   | 9.079366    | 7.979065    |

|            |             |             |             |             |             |             |             |             |
|------------|-------------|-------------|-------------|-------------|-------------|-------------|-------------|-------------|
| "Amph"     | 2.853786    | 3.0780742   | 3.0109212   | 3.1927557   | 3.0040805   | 2.9778023   | 2.9969149   | 3.0845325   |
| "Amy1"     | 9.4855385   | 9.927603    | 9.431449    | 9.698297    | 10.027538   | 9.656246    | 9.661313    | 10.527359   |
| "Amy2a1"   | 9.097994    | 3.2839577   | 3.0241797   | 3.2004242   | 3.0443242   | 2.8996792   | 3.0253744   | 3.636797    |
| "Amz2"     | 7.2642205   | 7.56613     | 8.058334    | 8.1591968   | 7.1207195   | 7.28627875  | 7.8652565   | 8.1831748   |
| "Anapc1"   | 4.97333405  | 5.2082809   | 5.38931125  | 5.4311097   | 5.33268265  | 5.01159715  | 5.2849834   | 5.35795375  |
| "Anapc11"  | 6.2117033   | 6.0937266   | 6.6201267   | 6.2660646   | 6.127535    | 6.0943375   | 6.288873    | 6.3362107   |
| "Anapc13"  | 10.774418   | 10.8011265  | 10.999993   | 10.943777   | 10.734685   | 10.523887   | 11.033569   | 10.879992   |
| "Anapc16"  | 7.229184425 | 7.6844475   | 5.928293475 | 6.096376625 | 6.9341424   | 7.772967775 | 5.729629125 | 6.00878265  |
| "Anapc2"   | 7.480254    | 8.107974    | 7.7107244   | 7.5585217   | 7.9613643   | 7.9962144   | 7.567482    | 7.510363    |
| "Anapc4"   | 8.097696    | 8.6369995   | 8.374063    | 8.614297    | 8.36875565  | 8.408242    | 8.54638465  | 8.76592     |
| "Anapc5"   | 11.04588608 | 12.11086375 | 11.83665767 | 11.70221267 | 11.32044508 | 11.39656725 | 11.6319635  | 11.58004133 |
| "Anapc7"   | 7.758041    | 8.431525    | 7.552399    | 7.604663    | 8.040082    | 7.9658165   | 7.6275187   | 7.4369903   |
| "Ang"      | 10.186903   | 5.6531444   | 5.4596786   | 4.7793427   | 6.5550666   | 7.081275    | 4.9230614   | 5.554977    |
| "Ang2"     | 2.8094683   | 2.9479597   | 2.8453245   | 3.0153456   | 2.8472328   | 2.779805    | 2.8362818   | 2.9444127   |
| "Ang3"     | 2.5493805   | 2.7070928   | 2.569462    | 2.6438222   | 2.5697129   | 2.4906404   | 2.5688443   | 2.6434677   |
| "Angel1"   | 2.29888     | 2.3029547   | 2.3034294   | 2.3333197   | 2.3060002   | 2.142929    | 2.466291    | 2.336407    |
| "Angel2"   | 5.16057988  | 5.60496732  | 5.52195648  | 5.729736    | 5.45519072  | 5.45293496  | 5.5570918   | 5.6383814   |
| "Angpt1"   | 2.2459733   | 2.3274283   | 2.378762    | 2.3903494   | 2.2966514   | 2.2442665   | 2.2943428   | 2.3855832   |
| "Angpt2"   | 3.6671815   | 4.036545    | 3.9558895   | 3.9870405   | 3.998979    | 3.944021    | 3.949625    | 4.061685    |
| "Angpt4"   | 2.3951745   | 2.5618727   | 2.4136567   | 2.517739    | 2.4154181   | 2.3732543   | 2.4129922   | 2.4901452   |
| "Angpt11"  | 2.7089589   | 2.79572     | 3.3100073   | 2.837563    | 2.795342    | 2.7353024   | 2.7856274   | 2.837951    |
| "Angpt12"  | 4.731224367 | 4.417517267 | 6.7589789   | 5.6866621   | 5.128244933 | 4.377598267 | 6.331133667 | 5.649227267 |
| "Angpt13"  | 9.37959     | 2.5519972   | 2.68962     | 2.768168    | 2.5193887   | 2.4368734   | 2.4888039   | 2.6026578   |
| "Angpt14"  | 6.7259425   | 5.5286793   | 5.00692605  | 3.77973535  | 6.08131     | 6.60358625  | 5.52746965  | 4.96934485  |
| "Angpt16"  | 5.116497    | 5.123923    | 5.1268735   | 5.1620464   | 3.7446392   | 3.7081292   | 6.138817    | 5.386169    |
| "Angpt17"  | 7.424951    | 7.4725366   | 8.660302    | 7.5138936   | 6.23132     | 8.382899    | 2.7868233   | 8.926546    |
| "Ank"      | 10.628706   | 11.466171   | 10.860494   | 11.324693   | 10.975387   | 11.195478   | 10.526408   | 11.081395   |
| "Ank1"     | 6.371840833 | 6.1433252   | 7.435084933 | 7.268027067 | 6.0067544   | 4.981414    | 7.210744033 | 7.2073653   |
| "Ank3"     | 10.89780133 | 11.053207   | 9.9900355   | 10.12247233 | 10.94650967 | 10.54354067 | 10.02156277 | 10.189002   |
| "Ankfy1"   | 5.6926923   | 5.5536327   | 5.754406    | 5.476565    | 5.628091    | 6.0212927   | 5.8370376   | 5.6332526   |
| "Ankhd1"   | 6.7589035   | 7.380744    | 6.502715    | 6.62183685  | 6.843426    | 7.02144575  | 6.5201051   | 6.6686575   |
| "Ankib1"   | 5.08899215  | 5.51064945  | 5.57292835  | 5.8440397   | 5.35425905  | 5.21539115  | 5.3992383   | 5.81315425  |
| "Ankmy2"   | 2.999415067 | 2.9563385   | 3.126731867 | 3.193448867 | 3.0560991   | 2.957241833 | 3.2709114   | 3.130583733 |
| "Ankra2"   | 5.603438    | 6.4569407   | 6.2481956   | 6.193248    | 5.567064    | 5.938692    | 6.40774     | 5.8354516   |
| "Ankrd1"   | 9.7896065   | 7.55439185  | 7.683496    | 6.64677715  | 6.83193035  | 6.68046     | 9.5681225   | 7.9896133   |
| "Ankrd10"  | 8.927988    | 8.09040085  | 8.6123145   | 8.81878915  | 8.4631128   | 8.4352762   | 9.22706475  | 8.9513087   |
| "Ankrd12"  | 2.874814    | 2.9853482   | 2.8885179   | 2.9571466   | 2.8914254   | 2.8679867   | 2.8867273   | 3.0267785   |
| "Ankrd13a" | 6.861917    | 7.1402717   | 7.0440574   | 7.0134      | 7.093777    | 7.6557336   | 7.0161195   | 7.1384497   |
| "Ankrd13c" | 8.91198     | 8.966189    | 9.27042     | 8.937044    | 8.446708    | 8.749022    | 9.01073     | 8.900841    |
| "Ankrd17"  | 5.90374478  | 5.97780276  | 5.93341726  | 6.02385796  | 6.07951756  | 5.94567108  | 6.0778251   | 6.02993746  |
| "Ankrd2"   | 12.925726   | 12.202344   | 9.781855    | 11.266403   | 13.186033   | 12.623871   | 11.561311   | 11.342381   |
| "Ankrd22"  | 2.6943008   | 2.8444766   | 2.76258995  | 2.8866465   | 2.7615463   | 2.6920195   | 2.7602954   | 2.84383365  |
| "Ankrd24"  | 3.666423533 | 3.531969167 | 4.340712633 | 4.66895     | 3.589442367 | 3.583541467 | 4.1971172   | 4.184713167 |
| "Ankrd28"  | 3.1228943   | 3.3450594   | 3.4018292   | 3.7115622   | 3.2723186   | 2.7623749   | 3.3185182   | 3.4168148   |
| "Ankrd27"  | 2.478674    | 2.6094112   | 2.558792    | 2.6397138   | 2.567643    | 2.5359993   | 2.5643904   | 2.64288     |
| "Ankrd28"  | 7.703484    | 8.189088    | 8.8296795   | 9.260032    | 8.117802    | 7.865469    | 8.416373    | 9.305174    |
| "Ankrd32"  | 7.617283    | 7.5716476   | 5.985519    | 6.4347563   | 7.6928415   | 7.4260106   | 6.4484854   | 6.841639    |
| "Ankrd33b" | 10.902405   | 8.760332    | 6.840885    | 6.089345    | 9.056035    | 9.661626    | 7.2806797   | 6.953147    |
| "Ankrd36"  | 2.7241852   | 2.8174205   | 2.7509081   | 2.8657296   | 2.7570927   | 2.6984296   | 2.754257    | 2.8370087   |
| "Ankrd40"  | 8.3825348   | 8.23106575  | 8.990561    | 9.2576165   | 8.4906427   | 7.9013185   | 9.0585975   | 9.16441     |
| "Ankrd44"  | 6.685817    | 7.067792    | 7.069237    | 6.7848334   | 7.423765    | 8.270248    | 7.273909    | 7.0218973   |
| "Ankrd46"  | 6.4229565   | 6.4707036   | 6.6547303   | 6.3114505   | 6.611842    | 6.4134216   | 6.6853094   | 6.289035    |
| "Ankrd49"  | 6.3584275   | 6.821511    | 6.518808    | 6.7896404   | 6.575873    | 6.3441863   | 6.482478    | 6.6427255   |
| "Ankrd5"   | 2.4322476   | 2.4709587   | 2.4075477   | 2.5236177   | 2.8319383   | 2.4259684   | 2.4349952   | 2.5103495   |
| "Ankrd54"  | 3.89596     | 4.5377455   | 3.998698    | 4.04001155  | 4.0136572   | 4.44384735  | 3.86672795  | 3.8711354   |
| "Anks1"    | 3.4758182   | 3.4720545   | 3.4829726   | 3.5012803   | 3.6789994   | 3.467059    | 3.481679    | 3.5177464   |
| "Anks3"    | 4.5646133   | 5.7434053   | 5.005783    | 4.926252    | 5.1666207   | 5.701873    | 4.72965     | 5.1519737   |
| "Ankf1"    | 3.414646717 | 4.092401383 | 3.445798533 | 3.563749917 | 3.79679565  | 4.004832083 | 3.5120672   | 3.57309085  |
| "Anln"     | 3.1121788   | 3.5084305   | 3.4167051   | 3.1145337   | 3.1255407   | 3.0972238   | 3.2423298   | 3.192292    |
| "Ano1"     | 2.6221268   | 2.765184    | 2.7229567   | 2.8135185   | 2.7249422   | 2.9303303   | 2.6856642   | 2.8113022   |
| "Ano10"    | 6.193728    | 6.5037346   | 6.5258946   | 6.5326343   | 6.481869    | 6.4903274   | 6.7728076   | 6.450124    |
| "Anp32a"   | 6.8844181   | 7.320464833 | 6.672022167 | 6.5751653   | 7.0253195   | 7.925928767 | 6.647150333 | 6.7985252   |
| "Anp32b"   | 10.453909   | 10.677907   | 10.598952   | 10.543995   | 10.550073   | 10.597696   | 10.748627   | 10.552752   |
| "Anp32e"   | 8.4645607   | 8.72291625  | 8.91821525  | 8.9213215   | 8.700432    | 8.721295    | 8.980315    | 8.9305305   |
| "Antxr1"   | 7.1955833   | 6.3716373   | 9.374451    | 8.357575    | 7.908068    | 7.890941    | 7.5671425   | 8.516393    |
| "Antxr2"   | 7.691028    | 6.0061398   | 8.525453    | 7.959051    | 7.9050903   | 7.567945    | 7.9691324   | 8.119965    |
| "Anxa1"    | 10.2432375  | 9.212017    | 10.892168   | 9.7505045   | 10.516737   | 10.457593   | 10.260333   | 10.078318   |
| "Anxa10"   | 2.349953    | 2.4328809   | 2.3875093   | 2.5222514   | 2.3902977   | 2.3474724   | 2.3875682   | 2.4875011   |
| "Anxa11"   | 7.9506187   | 8.286931    | 7.974113    | 8.269511    | 8.095956    | 8.166071    | 7.9152174   | 8.04655     |
| "Anxa13"   | 2.3810787   | 3.662037    | 2.4037726   | 2.4808857   | 2.411346    | 3.0843585   | 2.400394    | 2.452104    |
| "Anxa2"    | 5.204157533 | 4.6286738   | 5.406750933 | 5.0539005   | 5.112639467 | 4.951405833 | 5.365196067 | 5.117132067 |
| "Anxa3"    | 8.317508    | 7.951216    | 8.650511    | 8.093681    | 8.996037    | 9.3390875   | 8.091571    | 8.3648615   |
| "Anxa4"    | 7.756277    | 6.97926525  | 7.135592    | 6.8993122   | 7.4551409   | 7.04030185  | 8.126017    | 6.8862285   |
| "Anxa5"    | 9.897857    | 8.117738    | 10.706522   | 9.711836    | 9.867616    | 9.790695    | 10.344555   | 9.942459    |
| "Anxa6"    | 4.4044987   | 4.994408333 | 5.318598167 | 5.3592671   | 5.355308233 | 5.0103805   | 5.4111047   | 5.453739667 |
| "Anxa7"    | 7.6076438   | 8.657709367 | 7.8653942   | 8.1730747   | 7.628266233 | 8.973747167 | 7.9358789   | 7.894225667 |
| "Anxa8"    | 3.94210665  | 2.4487045   | 5.25244425  | 2.448375    | 2.7393989   | 3.12349775  | 2.7516384   | 2.44835555  |
| "Aoc3"     | 5.6586514   | 5.7575912   | 8.583741    | 6.3759418   | 9.399424    | 8.085438    | 9.100272    | 7.3979626   |
| "Aox1"     | 8.557678    | 7.303501    | 8.404886    | 8.769439    | 9.331921    | 8.802466    | 8.881769    | 9.3264475   |
| "Aox3"     | 4.282263    | 2.2533023   | 2.2325869   | 2.290773    | 2.234139    | 2.2313333   | 2.231606    | 2.299847    |
| "Ap1ar"    | 8.494188    | 8.5515585   | 9.293964    | 9.510117    | 8.633686    | 8.320651    | 8.86582     | 9.333065    |

|           |             |             |             |             |             |             |             |             |
|-----------|-------------|-------------|-------------|-------------|-------------|-------------|-------------|-------------|
| "Ap1b1"   | 6.004047    | 6.1899514   | 6.132149    | 6.3482423   | 6.2933893   | 6.111425    | 6.0466137   | 6.0831504   |
| "Ap1g1"   | 4.4741666   | 4.6299969   | 4.0122454   | 4.2645489   | 4.5483408   | 4.61721005  | 4.2349572   | 4.28166795  |
| "Ap1g2"   | 3.8298776   | 3.8398442   | 3.8997483   | 3.9007533   | 3.8440967   | 4.1960974   | 3.8433046   | 3.6020298   |
| "Ap1m1"   | 5.405479    | 5.53708     | 5.399651    | 5.376032    | 5.410613    | 5.396742    | 5.4110518   | 5.184243    |
| "Ap1s1"   | 6.207609    | 5.806167    | 6.488269    | 6.410932    | 5.9978466   | 5.7033014   | 6.6680627   | 5.8235483   |
| "Ap1s2"   | 4.609174333 | 4.640516767 | 4.703531633 | 4.939854133 | 4.538343133 | 4.543688033 | 4.6728149   | 4.900556667 |
| "Ap2a1"   | 3.9131007   | 4.8518424   | 3.9817448   | 3.9680645   | 4.151501    | 3.9266572   | 3.685413    | 3.3214197   |
| "Ap2a2"   | 6.83546348  | 5.9963832   | 6.11804894  | 6.20907786  | 6.35716438  | 6.24414268  | 6.37750134  | 6.17631892  |
| "Ap2b1"   | 5.87156365  | 5.94861385  | 5.5551702   | 5.2341539   | 5.86059785  | 6.2271412   | 6.085092    | 5.22131515  |
| "Ap2m1"   | 7.8582683   | 8.123684    | 8.19522     | 7.8642416   | 7.954323    | 7.825431    | 8.287719    | 7.5176673   |
| "Ap2s1"   | 8.683287    | 8.579555    | 8.622045    | 8.537579    | 8.561357    | 8.70591     | 9.026661    | 8.635125    |
| "Ap3b1"   | 7.8068887   | 7.62713335  | 7.3171673   | 7.1781232   | 7.5143162   | 7.71078035  | 7.56744565  | 7.31950165  |
| "Ap3b2"   | 2.48715545  | 2.67197335  | 2.54021895  | 2.66424825  | 2.5310576   | 2.49189375  | 2.52615715  | 2.6407748   |
| "Ap3d1"   | 8.59779     | 8.922154    | 8.014577    | 8.037375    | 8.549981    | 8.867491    | 8.514535    | 8.103508    |
| "Ap3m1"   | 4.47292055  | 5.103880625 | 5.377957325 | 5.48540185  | 5.0273745   | 5.371535675 | 5.277914    | 5.6031806   |
| "Ap3m2"   | 2.4538803   | 2.708581    | 2.6700494   | 2.7504864   | 2.6707242   | 2.699173    | 3.4388185   | 2.7528393   |
| "Ap3s1"   | 8.5851555   | 7.815368    | 9.127017    | 8.834787    | 9.271846    | 9.319971    | 9.688435    | 9.0394335   |
| "Ap3s2"   | 2.8077664   | 3.0007526   | 2.889640333 | 2.9618821   | 2.914012667 | 2.9098095   | 2.913450267 | 2.971584167 |
| "Ap4b1"   | 7.5184155   | 7.684158    | 6.821048    | 7.0853357   | 7.695429    | 7.3376026   | 6.848052    | 7.0523634   |
| "Ap4s1"   | 10.636867   | 10.781632   | 11.044444   | 11.13127    | 10.537159   | 10.366326   | 11.2422     | 10.92689    |
| "Apaf1"   | 3.906588    | 3.8073912   | 4.565118    | 3.890362    | 4.775961    | 5.0406513   | 4.1316395   | 4.0305843   |
| "Apba3"   | 7.6512837   | 7.938259    | 7.7530994   | 7.7331476   | 7.849467    | 7.5971794   | 8.024183    | 7.840587    |
| "Apbb1"   | 3.5491489   | 3.55633775  | 3.62959015  | 3.77411745  | 3.4059274   | 3.3012085   | 3.490624    | 3.7815423   |
| "Apbb2"   | 5.481970633 | 5.781723033 | 6.71153     | 7.013011833 | 6.4264014   | 6.724783567 | 6.437431767 | 6.907081467 |
| "Apbb3"   | 3.7355375   | 6.0868974   | 3.6991463   | 3.7166705   | 4.4450455   | 5.938985    | 3.6843457   | 3.7050025   |
| "Apc"     | 4.864891267 | 5.053649067 | 4.9768506   | 5.1434439   | 5.003009067 | 5.003369333 | 5.2505334   | 5.114591367 |
| "Apc2"    | 2.2943742   | 2.3734107   | 2.3351626   | 2.4345777   | 2.3324964   | 2.2923253   | 2.3297224   | 2.41771     |
| "Apcdd1"  | 4.029412325 | 4.523743275 | 5.5249401   | 4.85131935  | 6.86163775  | 4.993958175 | 5.926689    | 5.24565095  |
| "Apcs"    | 10.53726    | 2.7244434   | 3.234255    | 2.7751303   | 2.703347    | 2.5831501   | 2.6478333   | 2.7688666   |
| "Apeh"    | 7.86555     | 7.6572037   | 7.8626785   | 7.6925244   | 8.025194    | 7.522291    | 7.717837    | 7.6257453   |
| "Apex1"   | 7.853057767 | 8.296100667 | 8.043721567 | 8.203430667 | 7.8199469   | 7.619163867 | 8.049248833 | 7.976021767 |
| "Apex2"   | 2.7403586   | 3.5757632   | 2.8317091   | 2.946104    | 2.8050323   | 3.335047    | 2.7923617   | 2.88541     |
| "Aph1a"   | 6.9746458   | 7.017631833 | 6.929258133 | 7.024851033 | 7.264268067 | 6.975421133 | 6.8286692   | 7.071116667 |
| "Api5"    | 6.225618525 | 6.49147105  | 6.183799325 | 6.2710327   | 6.2459021   | 6.577536    | 6.17996365  | 6.206493325 |
| "Apiip"   | 8.175377    | 8.475706    | 8.483424    | 8.781768    | 8.41269     | 8.248104    | 8.462526    | 8.641385    |
| "Aplf"    | 2.84269845  | 2.97259555  | 2.8708182   | 3.01321015  | 2.934746    | 2.84359075  | 2.8867053   | 3.0083787   |
| "Apln"    | 2.7012296   | 2.923467    | 3.5047453   | 2.935172    | 2.8947008   | 2.8612769   | 2.8381371   | 2.9374478   |
| "Aplnr"   | 3.3686529   | 3.48057485  | 6.2647443   | 6.607771    | 4.95210335  | 3.8460926   | 5.48944045  | 6.43963     |
| "Aplp2"   | 6.62587152  | 6.45753108  | 7.00485956  | 6.8918098   | 6.99557916  | 6.86951272  | 7.11830618  | 6.97576034  |
| "Apoa1"   | 13.308497   | 2.714314425 | 7.370899175 | 2.696615475 | 5.52543615  | 2.613063375 | 2.593503125 | 5.1796045   |
| "Apoa1bp" | 8.784152    | 8.943211    | 9.276149    | 9.209452    | 8.876272    | 8.421974    | 9.141628    | 9.151732    |
| "Apoa2"   | 14.148873   | 2.6960707   | 8.466669    | 2.6207528   | 7.8027554   | 2.4980721   | 2.5490236   | 6.9749846   |
| "Apoa4"   | 7.004621    | 2.51513185  | 2.5086645   | 2.5618239   | 2.50207115  | 2.384104    | 2.4497372   | 2.56162655  |
| "Apoa5"   | 11.498968   | 3.1555498   | 3.6095805   | 3.1531072   | 5.4943614   | 3.2420876   | 3.1362505   | 3.3635414   |
| "Apob"    | 10.908411   | 2.6415732   | 3.72464     | 2.6887665   | 2.7597666   | 2.5851305   | 2.6238322   | 2.723412    |
| "Apobec1" | 5.325181    | 4.268451    | 4.778909    | 4.8452005   | 5.7309303   | 6.681651    | 5.5646524   | 4.6397963   |
| "Apobec2" | 12.643976   | 12.886455   | 13.349636   | 13.265228   | 13.4496     | 12.876963   | 13.062244   | 13.197332   |
| "Apobec3" | 3.177944    | 3.4398873   | 3.3034437   | 3.3889534   | 3.2963634   | 3.9303794   | 3.3315072   | 3.3645582   |
| "Apoc1"   | 12.619682   | 6.4843326   | 7.902136    | 3.885973    | 7.851019    | 8.411238    | 9.694496    | 6.812614    |
| "Apoc2"   | 8.221922    | 2.4423552   | 2.4341388   | 2.487746    | 2.4318626   | 2.6901696   | 2.4315898   | 2.476234    |
| "Apoc3"   | 12.979844   | 6.0950103   | 6.6827025   | 3.8807442   | 7.5412645   | 7.3634834   | 5.4337425   | 5.5777063   |
| "Apoc4"   | 9.652882    | 2.110466    | 3.904627    | 2.156839    | 2.2500668   | 2.0620136   | 2.0887208   | 2.177216    |
| "Apod"    | 11.666336   | 11.89194    | 10.620356   | 10.263392   | 11.80862    | 11.624622   | 11.982487   | 10.590069   |
| "Apoe"    | 12.915913   | 8.38781     | 9.841501    | 7.9349103   | 11.115699   | 11.522046   | 11.073593   | 8.9300375   |
| "Apoif"   | 9.781947    | 2.3285623   | 2.3187943   | 2.3615396   | 2.3161483   | 2.1802993   | 2.2927756   | 2.3959568   |
| "Apoih"   | 12.258154   | 3.3491974   | 6.536552    | 2.8009114   | 5.7847066   | 2.9032304   | 2.9603875   | 3.8014145   |
| "Apol9a"  | 6.7059116   | 2.9797242   | 2.88808     | 3.042089    | 2.8898396   | 2.8680506   | 2.9445748   | 3.0041306   |
| "Apom"    | 9.630094    | 2.8275343   | 2.9341276   | 2.7843943   | 2.805825    | 2.6045071   | 2.64445505  | 2.92390825  |
| "Apon"    | 8.791931    | 2.3486357   | 2.377086    | 2.3907998   | 2.765973    | 2.2514079   | 2.3028283   | 2.396172    |
| "Apool"   | 8.354189    | 8.364574    | 8.65173     | 8.869661    | 8.844736    | 8.403904    | 8.671238    | 8.873137    |
| "App"     | 10.2116275  | 9.4461815   | 10.3677445  | 9.857796    | 10.171626   | 10.1080655  | 10.155506   | 10.161619   |
| "Appbp2"  | 8.284048    | 7.7139063   | 7.815899    | 7.3906345   | 8.041442    | 8.169768    | 7.6774254   | 7.4373517   |
| "Appl1"   | 5.7728705   | 6.668136    | 7.01005     | 6.8696632   | 6.6564226   | 6.753549    | 6.8001842   | 7.0055118   |
| "Appl2"   | 9.053692    | 8.953009    | 8.801056    | 8.2385235   | 9.075677    | 9.055535    | 8.665653    | 8.791799    |
| "Aprt"    | 8.3645547   | 8.581306    | 8.07795865  | 7.9571534   | 8.3552295   | 8.4124185   | 7.99165925  | 7.9976238   |
| "Aptx"    | 6.25434     | 7.0598435   | 6.811119    | 7.46407     | 6.924122    | 6.372198    | 6.999203    | 7.0637417   |
| "Aqp1"    | 11.103937   | 11.628205   | 11.208419   | 11.507762   | 11.76628    | 11.652237   | 11.081841   | 11.666277   |
| "Aqp2"    | 2.507563    | 2.7283926   | 2.5162559   | 2.5650394   | 2.5156431   | 2.4998531   | 2.5115407   | 2.5510142   |
| "Aqp3"    | 3.3888706   | 3.6591229   | 3.58013725  | 3.7430055   | 3.54873455  | 3.47284385  | 3.5113989   | 3.63753445  |
| "Aqp4"    | 5.10689845  | 4.8200416   | 8.51585215  | 8.4127306   | 6.52136325  | 4.552587    | 8.091327    | 8.5450225   |
| "Aqp5"    | 2.970697    | 2.9847796   | 5.584855    | 3.0064132   | 3.6715083   | 3.2079697   | 5.957209    | 3.3924527   |
| "Aqp7"    | 3.2539643   | 3.0083797   | 3.96724605  | 3.77683805  | 4.1304431   | 4.17345735  | 4.3333241   | 4.238303    |
| "Aqp8"    | 2.568642    | 2.3826175   | 2.3532403   | 2.423524    | 2.3519723   | 2.251283    | 2.406599    | 2.379423    |
| "Aqp9"    | 7.672186    | 2.276277    | 2.7808747   | 2.3230207   | 2.3449047   | 2.2364764   | 2.2598689   | 2.3231637   |
| "Aqr"     | 4.092753225 | 4.33579695  | 4.006698925 | 4.084961025 | 4.040029    | 4.159899725 | 4.032872375 | 4.1133917   |
| "Ar"      | 4.7883325   | 5.3544536   | 5.180439    | 5.2831945   | 4.9654684   | 5.5926285   | 4.9837785   | 5.014682    |
| "Araf"    | 6.2762256   | 6.099059    | 5.7767363   | 5.1378384   | 5.761316    | 6.139735    | 6.4092646   | 5.295152    |
| "Arap1"   | 3.2362657   | 3.4052598   | 3.78251     | 3.424167    | 3.3142219   | 3.528996    | 3.3900762   | 3.4490023   |
| "Arap2"   | 4.1001015   | 2.9440753   | 3.6133313   | 2.9664676   | 3.075851    | 4.7376513   | 3.8651156   | 3.0682003   |
| "Arap3"   | 4.485587    | 4.4679999   | 4.53412925  | 4.6645203   | 4.64761785  | 4.87189865  | 4.72894615  | 4.93007005  |
| "Arcn1"   | 6.4739867   | 7.218249    | 6.7920811   | 6.70326665  | 6.6659384   | 6.9300778   | 6.77956065  | 6.69034545  |

|             |             |             |             |             |             |             |             |             |
|-------------|-------------|-------------|-------------|-------------|-------------|-------------|-------------|-------------|
| "Arf1"      | 10.570702   | 10.887775   | 10.875873   | 10.5639395  | 10.6530915  | 10.7802515  | 10.801075   | 10.571016   |
| "Arf2"      | 3.6739556   | 3.837626125 | 3.857373075 | 3.888438875 | 3.759081075 | 3.66312355  | 3.750673525 | 3.87116635  |
| "Arf3"      | 4.57711885  | 4.372303825 | 4.667471    | 4.587615725 | 4.696533875 | 4.8188077   | 4.81035245  | 4.44733515  |
| "Arf4"      | 5.58976335  | 4.891484425 | 5.60727035  | 5.478393075 | 5.4774181   | 5.621839925 | 5.6089155   | 5.36711585  |
| "Arf5"      | 6.851138    | 6.105825    | 6.970621    | 6.488917    | 6.7659187   | 6.6822186   | 7.149812    | 6.7245836   |
| "Arf6"      | 7.02590585  | 6.55959425  | 6.783595425 | 6.79009055  | 6.7206108   | 6.99301465  | 6.9641836   | 6.684606225 |
| "Arfgap1"   | 6.773035    | 8.060996    | 6.9578094   | 6.8118825   | 7.0794373   | 7.704039    | 6.2712846   | 6.7128935   |
| "Arfgap2"   | 9.7215355   | 10.9228875  | 10.0584425  | 10.2692025  | 10.05145875 | 10.3807435  | 9.99096225  | 10.15359    |
| "Arfgap3"   | 5.0475245   | 4.72349     | 5.3966312   | 4.222764    | 5.671127    | 5.611086    | 5.400408    | 5.075301    |
| "Arfgef1"   | 9.071791    | 9.749792    | 10.040181   | 10.16938    | 9.482037    | 9.872278    | 9.518851    | 10.243539   |
| "Arfip2"    | 2.3347642   | 3.0968904   | 2.5088332   | 2.559879    | 2.6311588   | 2.4895322   | 2.511754    | 2.5595908   |
| "Arfrp1"    | 6.5244273   | 6.55623     | 6.620922667 | 6.663327667 | 6.619493267 | 6.785733767 | 6.687119333 | 6.847358333 |
| "Arg1"      | 11.953897   | 2.0973692   | 4.8442      | 2.1460319   | 2.1758988   | 2.0569108   | 2.078757    | 2.1645806   |
| "Arg2"      | 3.1492422   | 3.271438    | 3.051719    | 3.2057748   | 3.0652268   | 2.9965613   | 3.050559    | 3.1806269   |
| "Arhlu1"    | 8.456898    | 9.358253    | 8.60516475  | 8.597813    | 8.613098    | 8.9833107   | 8.3454465   | 8.53594065  |
| "Arhgap1"   | 5.998671    | 6.194079    | 6.20631     | 6.313972    | 6.1393714   | 6.2785516   | 6.4688487   | 5.7029095   |
| "Arhgap10"  | 2.4903474   | 2.8665612   | 2.6855807   | 2.8209467   | 2.5479403   | 2.6396637   | 2.6686401   | 2.6557646   |
| "Arhgap12"  | 5.16434525  | 5.0975003   | 5.5874743   | 5.60385615  | 5.5770236   | 5.2064508   | 5.42739965  | 5.7349432   |
| "Arhgap17"  | 7.757985    | 8.484998    | 8.28436     | 8.277344    | 8.321941    | 8.512294    | 8.478784    | 8.430178    |
| "Arhgap18"  | 4.155459    | 3.7923856   | 4.2846026   | 4.1850753   | 4.0440326   | 4.1397767   | 4.186746    | 4.505322    |
| "Arhgap20"  | 6.4014006   | 7.3115177   | 7.6961756   | 7.559096    | 6.8004327   | 6.297027    | 7.621365    | 7.2838864   |
| "Arhgap21"  | 6.974387    | 7.047379    | 7.1579458   | 7.306997    | 7.31268615  | 6.9284425   | 7.0541564   | 7.38937535  |
| "Arhgap23"  | 4.6269493   | 4.909755    | 4.9079447   | 4.025594    | 5.0496135   | 5.440078    | 4.7693996   | 4.360263    |
| "Arhgap24"  | 7.5377827   | 7.390039    | 6.3978624   | 7.13868     | 6.9579954   | 7.012958    | 7.0422926   | 7.107113    |
| "Arhgap27"  | 3.4005253   | 3.610033    | 3.3199964   | 3.5395427   | 3.7742913   | 3.8033643   | 3.4032712   | 3.3320038   |
| "Arhgap29"  | 3.508833    | 3.9407213   | 3.5901575   | 3.9270923   | 3.6897924   | 3.5050566   | 3.6416225   | 3.8726826   |
| "Arhgap31"  | 3.1149542   | 3.573424    | 3.003872    | 3.0609174   | 3.167971    | 2.96395     | 3.0036752   | 3.1054788   |
| "Arhgap39"  | 2.9592519   | 3.1922512   | 3.083587    | 3.1897602   | 3.178045    | 2.8447309   | 3.1460652   | 3.5615003   |
| "Arhgap4"   | 2.7973948   | 2.858537    | 2.8407269   | 2.9105504   | 2.843044    | 3.93272     | 2.8210888   | 2.9627404   |
| "Arhgap5"   | 7.868056333 | 7.951417    | 8.151643167 | 8.697582    | 8.266149333 | 7.574737333 | 8.149887833 | 8.754946    |
| "Arhgap6"   | 4.336740767 | 5.319737933 | 4.7760157   | 4.7701437   | 4.942669867 | 4.613535967 | 4.735109533 | 4.738591333 |
| "Arhgap9"   | 2.49911985  | 2.5030023   | 2.4982608   | 2.587377375 | 2.53521185  | 3.325302325 | 2.6442036   | 2.5240251   |
| "Arhgdia"   | 6.92431     | 6.8328843   | 6.9479547   | 6.5857744   | 6.9387207   | 7.292621    | 7.0989666   | 6.7424793   |
| "Arhgdib"   | 4.681505    | 3.9901862   | 5.3134127   | 4.737404    | 4.640026    | 6.643719    | 4.6818275   | 4.733282    |
| "Arhgdig"   | 2.3062143   | 2.3675103   | 2.3334289   | 2.3833373   | 2.3356624   | 2.3159046   | 2.8088732   | 2.3676383   |
| "Arhgef1"   | 2.9670684   | 3.0266533   | 2.9053166   | 3.065666    | 3.0041058   | 3.2965615   | 2.9976583   | 3.0776305   |
| "Arhgef10"  | 2.37765775  | 2.43291855  | 2.403735    | 2.54943375  | 2.43472685  | 2.4177592   | 2.43566165  | 2.50023565  |
| "Arhgef10l" | 4.690647    | 5.154145    | 6.1049423   | 6.6594963   | 5.236199    | 3.7463136   | 6.161132    | 6.0427384   |
| "Arhgef12"  | 6.9685051   | 6.5605882   | 5.951418067 | 6.387637567 | 6.4961855   | 6.654219667 | 6.488331767 | 6.334275667 |
| "Arhgef16"  | 2.3928328   | 2.4166613   | 2.3980093   | 2.4872575   | 2.3966084   | 2.3348837   | 2.3871903   | 2.4965746   |
| "Arhgef18"  | 5.0812902   | 4.016943    | 4.8820887   | 5.047796    | 5.134777    | 6.1433744   | 4.9179535   | 4.988865    |
| "Arhgef2"   | 5.14523425  | 5.29275115  | 4.90469765  | 4.9002987   | 4.92190425  | 4.97372345  | 4.92911025  | 4.9792764   |
| "Arhgef25"  | 4.891039933 | 5.0220865   | 5.840638367 | 5.512819967 | 5.403579767 | 4.7806729   | 5.387341967 | 5.880545433 |
| "Arhgef3"   | 5.8105173   | 6.3892093   | 6.174328    | 6.3324804   | 6.706957    | 6.64515     | 6.315351    | 6.528906    |
| "Arhgef40"  | 3.3243657   | 3.445303567 | 3.3808324   | 3.4014915   | 3.407727367 | 3.337611767 | 3.363102567 | 3.427219733 |
| "Arhgef5"   | 4.86736     | 5.5826664   | 5.226041    | 5.0338254   | 4.976474    | 5.3856916   | 5.07179     | 4.9885306   |
| "Arhgef7"   | 5.0886433   | 5.1155573   | 5.0892254   | 5.1016415   | 4.9422042   | 4.83963115  | 5.0808583   | 5.177997    |
| "Arid1a"    | 5.2375123   | 5.3325296   | 5.2907187   | 5.405611    | 5.52480735  | 5.5840057   | 5.4432172   | 5.35689895  |
| "Arid2"     | 8.529152    | 8.703294    | 8.376034    | 8.299908    | 8.810116    | 8.926556    | 8.363461    | 8.383549    |
| "Arid3a"    | 2.4561346   | 2.4970005   | 2.4713535   | 2.502586    | 2.4603636   | 2.4630663   | 2.4644032   | 2.490176    |
| "Arid3b"    | 2.546082    | 2.6342463   | 2.5408418   | 2.6152287   | 2.541481    | 2.6360157   | 2.5366626   | 2.6263008   |
| "Arid4b"    | 5.2250641   | 5.43439178  | 5.03654782  | 5.37184856  | 5.04268482  | 5.58226586  | 5.00785628  | 5.20486806  |
| "Arid5a"    | 5.142973    | 5.2335215   | 3.2659135   | 3.202104    | 4.329802    | 5.5727396   | 3.8472257   | 3.2868237   |
| "Arid5b"    | 6.0373752   | 5.83292835  | 5.25032055  | 5.11365675  | 5.4823817   | 5.915662    | 5.28260645  | 5.02411465  |
| "Arih1"     | 8.004175467 | 8.097017667 | 7.933851367 | 8.0450497   | 7.972174167 | 7.978319667 | 7.987782867 | 8.031939    |
| "Arih2"     | 7.740090175 | 8.5781136   | 7.781241    | 8.0090865   | 7.78022675  | 8.012912325 | 7.623084125 | 7.88886325  |
| "Arl1"      | 10.274541   | 10.224561   | 10.658875   | 10.910767   | 10.161586   | 9.9929085   | 10.419099   | 10.766967   |
| "Arl16"     | 3.78066505  | 3.66159     | 3.82038885  | 4.0754766   | 3.8466315   | 3.82167935  | 3.8435174   | 3.93774715  |
| "Arl2"      | 8.259974    | 8.463835    | 8.417165    | 8.268019    | 8.381685    | 8.0921      | 8.660154    | 8.361967    |
| "Arl2bp"    | 7.04533415  | 7.3645867   | 7.1630025   | 7.59262375  | 7.24146135  | 7.2746778   | 7.03577965  | 7.4713315   |
| "Arl3"      | 10.175657   | 10.359686   | 10.847152   | 10.684067   | 10.465664   | 10.069404   | 10.648325   | 10.773775   |
| "Arl4a"     | 9.923245    | 9.404257    | 9.096302    | 9.36021     | 9.86825     | 10.335395   | 9.792791    | 9.034842    |
| "Arl4c"     | 2.4260645   | 2.4526992   | 2.4127398   | 2.5287523   | 2.431423    | 2.6660986   | 2.5235581   | 2.5056024   |
| "Arl4d"     | 6.0699715   | 6.40385975  | 3.92712925  | 4.20955325  | 5.4878885   | 6.2610508   | 4.0468582   | 4.25895205  |
| "Arl5a"     | 7.1813375   | 7.0214515   | 7.2951585   | 7.357003    | 7.05872725  | 7.1300275   | 7.234545    | 7.286716    |
| "Arl6"      | 5.3899226   | 5.2298965   | 5.525418    | 5.800047    | 5.5760093   | 5.425718    | 5.579559    | 5.7466264   |
| "Arl6ip1"   | 7.15198     | 6.4318461   | 7.095518467 | 6.454958133 | 7.624291033 | 8.226029667 | 7.5735742   | 6.875470333 |
| "Arl6ip4"   | 9.16477     | 9.175864    | 9.349137    | 9.288762    | 8.982033    | 8.9108      | 9.461817    | 9.232022    |
| "Arl6ip5"   | 10.615784   | 10.106947   | 10.719998   | 10.635468   | 10.618153   | 10.443327   | 11.213641   | 10.584862   |
| "Arl6ip6"   | 4.0682117   | 4.29081185  | 4.2010474   | 4.2875303   | 4.2513741   | 4.27511155  | 4.1972699   | 4.54287775  |
| "Arl8a"     | 6.2646723   | 6.807915    | 6.027547    | 6.2367525   | 6.7851615   | 6.913685    | 6.3588066   | 6.3236732   |
| "Arl8b"     | 9.226048667 | 9.823138333 | 9.270975    | 9.5355295   | 9.54169     | 9.744661333 | 9.197585    | 9.540503667 |
| "Armc1"     | 7.9940382   | 8.07467965  | 8.260888    | 8.4639385   | 8.12674385  | 7.88120635  | 8.15159935  | 8.40561475  |
| "Armc10"    | 5.715128    | 5.7424083   | 5.490967    | 5.5696063   | 5.7459784   | 6.4278717   | 5.7030973   | 5.571785    |
| "Armc5"     | 6.179697    | 6.4748263   | 6.2094026   | 6.1539845   | 6.096439    | 6.0680056   | 6.0938377   | 6.1435065   |
| "Armc6"     | 5.1772532   | 5.369316    | 5.6140547   | 5.4203796   | 5.263109    | 5.276493    | 5.3095865   | 5.661749    |
| "Armcx1"    | 3.7436655   | 4.3641253   | 4.4500446   | 4.531219    | 4.3299875   | 4.483412    | 4.809661    | 4.398671    |
| "Armcx2"    | 5.02229015  | 3.36488035  | 5.781816    | 5.0593759   | 4.72134525  | 4.48318615  | 5.71874045  | 5.147344    |
| "Armcx3"    | 7.98410175  | 6.95128415  | 8.3301137   | 8.14376025  | 7.692575    | 7.0845103   | 8.5983265   | 8.13241485  |
| "Armcx4"    | 8.191595    | 6.7328434   | 7.90528     | 7.6947      | 7.3427334   | 6.349066    | 8.038746    | 7.7504935   |
| "Armcx5"    | 4.041868    | 5.3910503   | 4.2005973   | 4.2584543   | 5.140509    | 5.5963125   | 3.8730702   | 4.4132757   |

|           |             |             |             |             |             |             |             |             |
|-----------|-------------|-------------|-------------|-------------|-------------|-------------|-------------|-------------|
| "Arnt"    | 2.8514478   | 2.903063    | 2.8170416   | 2.917216    | 2.860967    | 2.8452606   | 2.776533    | 2.9090753   |
| "Arntl"   | 9.976254    | 9.492183    | 6.8390107   | 5.702671    | 7.3392076   | 9.151973    | 6.0052867   | 6.1767206   |
| "Arpc1a"  | 8.046422    | 8.195237    | 8.197144    | 8.0251255   | 8.441181    | 8.370146    | 8.487308    | 8.33585     |
| "Arpc1b"  | 5.63943175  | 4.90654685  | 5.80927635  | 5.329847    | 5.561301    | 5.8116377   | 5.8705238   | 5.4834025   |
| "Arpc2"   | 11.53738    | 11.198496   | 11.66626    | 11.307798   | 11.288784   | 11.504164   | 11.805899   | 11.307802   |
| "Arpc3"   | 10.408426   | 9.859915    | 10.080364   | 9.860742    | 10.190046   | 10.374555   | 10.42888    | 10.038769   |
| "Arpc4"   | 6.4142437   | 6.4080279   | 6.46135065  | 6.63091115  | 6.40224425  | 6.5365163   | 6.5354525   | 6.5203164   |
| "Arpc5"   | 8.616124    | 7.7669525   | 8.471108    | 7.7622476   | 8.336467    | 8.981196    | 8.534843    | 8.077583    |
| "Arpc5i"  | 10.0926245  | 10.397209   | 10.83914875 | 11.0318505  | 10.178455   | 9.949734    | 10.809814   | 10.871007   |
| "Arpp19"  | 8.352893333 | 8.408932033 | 8.2220018   | 8.499454333 | 8.215068133 | 8.0890582   | 8.549858933 | 8.556744133 |
| "Arpp21"  | 5.009925567 | 3.669818333 | 3.467312233 | 3.685820167 | 3.6967898   | 3.3129524   | 4.006322467 | 3.708546933 |
| "Arr3"    | 2.401605    | 2.4979067   | 2.4436536   | 2.5562754   | 2.4473653   | 2.405515    | 2.4424934   | 2.527531    |
| "Arrb1"   | 5.1024356   | 4.8278136   | 6.698664    | 5.6995316   | 5.8306727   | 6.5530224   | 6.420452    | 5.902299    |
| "Arrb2"   | 4.71932065  | 3.704449    | 4.21972375  | 3.9978945   | 3.9400792   | 5.23453825  | 4.22841025  | 3.9907273   |
| "Arrdc1"  | 3.39093415  | 3.801723    | 3.62842725  | 3.725945    | 3.63264845  | 3.63814625  | 3.61935265  | 3.6678675   |
| "Arrdc4"  | 6.688767    | 5.897748    | 5.2891485   | 5.5250847   | 5.65994985  | 5.41968985  | 5.4253715   | 5.57626745  |
| "Arsa"    | 6.143082    | 5.6252995   | 6.4697914   | 6.116367    | 6.362765    | 6.506785    | 6.52803     | 6.310837    |
| "Arsq"    | 2.49850045  | 2.55706155  | 2.53962835  | 2.6641324   | 2.5177009   | 2.44691265  | 2.512561    | 2.59663405  |
| "Arsi"    | 2.3655434   | 2.3648877   | 2.3912323   | 2.458861    | 2.385201    | 2.3654995   | 2.3843083   | 2.4196043   |
| "Art1"    | 10.841333   | 11.8610475  | 11.066633   | 11.129872   | 11.6491285  | 11.293181   | 10.7793105  | 10.99123675 |
| "Art2b"   | 2.4546993   | 2.5602677   | 2.5196767   | 2.641552    | 2.5190883   | 2.4681323   | 2.51822     | 2.6092749   |
| "Art3"    | 11.150909   | 12.384876   | 11.285884   | 11.457328   | 11.817541   | 11.372014   | 10.658323   | 11.263928   |
| "Art4"    | 2.4254444   | 2.4882662   | 2.4523878   | 2.583447    | 2.451864    | 2.4218564   | 2.4506843   | 2.542541    |
| "Art5"    | 6.72511765  | 7.06740565  | 5.9359377   | 6.02908255  | 7.1509062   | 6.57340885  | 6.29154765  | 6.58663205  |
| "Arvcf"   | 4.32765025  | 3.6825987   | 3.8234988   | 3.8255119   | 3.85020985  | 3.4670453   | 4.56033085  | 3.69412635  |
| "Arx"     | 2.420735    | 2.4573307   | 2.4369164   | 2.5031621   | 2.4369583   | 2.389673    | 2.4352422   | 2.4724398   |
| "Arxes1"  | 2.6142876   | 2.6850184   | 3.7158492   | 2.46032145  | 6.0672345   | 6.8286315   | 6.85200285  | 3.6702198   |
| "As3mt"   | 8.192257    | 7.504911    | 7.7905645   | 7.4790826   | 8.014103    | 7.1257143   | 8.331739    | 8.265738    |
| "Asah1"   | 9.61835     | 8.765842    | 9.719369    | 9.164436    | 9.6769495   | 9.799919    | 9.557996    | 9.23619     |
| "Asah2"   | 3.73857765  | 3.909513    | 4.28653715  | 4.4098925   | 4.31329625  | 4.00419245  | 4.37183125  | 4.0334215   |
| "Asap1"   | 3.40543735  | 3.30236785  | 3.3732385   | 3.4308805   | 3.4770828   | 3.2190117   | 3.363185    | 3.56839135  |
| "Asb10"   | 8.133871    | 8.598644    | 9.698467    | 10.2221985  | 8.412685    | 8.035841    | 8.997097    | 10.120476   |
| "Asb11"   | 11.90017    | 12.603313   | 11.49683    | 11.004356   | 12.313901   | 12.6511135  | 11.669902   | 11.397263   |
| "Asb12"   | 8.089395    | 8.266828    | 8.911326    | 8.93315     | 8.722203    | 8.641019    | 8.473921    | 8.836382    |
| "Asb13"   | 4.6717149   | 4.897807667 | 5.2816371   | 5.896854833 | 4.7459803   | 4.498847267 | 5.132883967 | 5.850418    |
| "Asb14"   | 8.822771    | 9.932777    | 10.062264   | 10.209287   | 9.227914    | 9.188973    | 9.349932    | 10.252913   |
| "Asb15"   | 4.2405744   | 5.5353503   | 4.587364    | 4.417761    | 4.3986983   | 4.019427    | 3.8619545   | 4.40416     |
| "Asb18"   | 2.558117    | 2.5947883   | 2.5716624   | 2.6931152   | 2.5732098   | 2.551235    | 2.5734935   | 2.6417084   |
| "Asb3"    | 5.0041847   | 5.4883723   | 5.244691    | 5.5886025   | 6.0705237   | 5.589063    | 5.267248    | 5.846061    |
| "Asb4"    | 6.0342755   | 7.800483    | 7.46514845  | 7.7987995   | 7.7653434   | 7.55593155  | 6.342598    | 7.5631775   |
| "Asb5"    | 12.871136   | 13.518851   | 12.705731   | 13.136875   | 13.094165   | 13.322887   | 12.127757   | 13.11657    |
| "Asb6"    | 4.63375725  | 5.1398507   | 4.98666955  | 5.1085705   | 5.09996375  | 4.7907965   | 4.74230835  | 4.797548    |
| "Asb8"    | 7.4807463   | 7.9979995   | 8.45678515  | 9.0187815   | 8.3105745   | 7.36611085  | 8.3439285   | 8.5839925   |
| "Ascc1"   | 4.4220753   | 5.2580776   | 4.1241174   | 4.0422153   | 4.118339    | 4.3879385   | 3.9048967   | 3.990182    |
| "Ascc2"   | 4.193913    | 4.11241055  | 4.1956036   | 4.3451461   | 3.7904997   | 4.1082536   | 4.50739165  | 4.3394838   |
| "Ascl2"   | 2.831991    | 3.046835    | 2.9237318   | 3.1099207   | 2.939804    | 2.8744383   | 2.9190516   | 3.0492432   |
| "Asf1a"   | 6.743601    | 7.1055235   | 6.959321    | 7.2792675   | 6.98536575  | 6.69499465  | 6.88436435  | 7.38395885  |
| "Asf1b"   | 3.158059    | 3.2130063   | 3.159978    | 3.2710738   | 3.298079    | 3.9537473   | 3.2077172   | 3.2529752   |
| "Asgr1"   | 8.647444    | 2.1595132   | 2.156964    | 2.2176547   | 2.1468034   | 2.119688    | 2.1251578   | 2.2149596   |
| "Asgr2"   | 2.4902306   | 2.2528865   | 2.2075312   | 2.295959    | 2.2531903   | 2.1780822   | 2.2105484   | 2.3001287   |
| "Ash1l"   | 8.233816233 | 8.897495333 | 8.440332667 | 8.571750333 | 8.463097667 | 8.736072667 | 8.2807539   | 8.4478065   |
| "Ash2l"   | 4.9660738   | 5.1338396   | 5.0485473   | 5.518585    | 5.0297045   | 5.0413227   | 5.0562372   | 5.2533815   |
| "Asl"     | 10.312124   | 3.1826077   | 3.7113353   | 3.190392    | 4.0104566   | 3.8442326   | 4.7061343   | 3.5297651   |
| "Asna1"   | 6.031459    | 6.0213766   | 5.7622356   | 6.7022614   | 5.8912253   | 5.7417884   | 6.6096773   | 6.311805    |
| "Asns"    | 4.2329357   | 4.1541757   | 4.2526447   | 3.52293705  | 6.451009    | 6.15099905  | 6.753597    | 4.23038465  |
| "Asnsd1"  | 10.811579   | 11.048043   | 11.021598   | 10.981935   | 10.615607   | 10.644341   | 11.113125   | 11.032681   |
| "Aspa"    | 5.452007    | 5.1823716   | 5.72087     | 6.6088133   | 6.3679485   | 5.717037    | 6.99809     | 7.080789    |
| "Aspdh"   | 5.11389     | 2.3086166   | 2.2910676   | 2.3719287   | 2.3150043   | 2.2603235   | 2.289476    | 2.3466952   |
| "Asph"    | 7.94477694  | 8.1382941   | 8.44886426  | 8.17234128  | 8.72794736  | 8.451372    | 8.4273978   | 8.23573954  |
| "Aspm"    | 2.3939393   | 2.4049625   | 2.3751497   | 2.434523    | 2.3939965   | 2.3392735   | 2.384517    | 2.4355369   |
| "Aspn"    | 7.30749775  | 6.53281235  | 7.7007003   | 8.0171024   | 7.9899483   | 7.1210187   | 7.37840465  | 8.065994    |
| "Asprv1"  | 2.4085584   | 2.1190114   | 3.4156559   | 2.1648648   | 2.1115167   | 2.0746381   | 2.1032472   | 2.1668153   |
| "Aspscr1" | 5.225682    | 5.601824    | 4.8851194   | 4.9265947   | 5.130009    | 5.767416    | 5.3221636   | 5.1893725   |
| "Asrgl1"  | 7.622146667 | 7.691385333 | 7.442006    | 7.451172333 | 7.594274667 | 7.116783233 | 7.875278333 | 7.176245833 |
| "Ass1"    | 8.836982    | 2.343545    | 2.3119755   | 2.4005604   | 2.3007996   | 2.241959    | 2.2952988   | 2.3887846   |
| "Aste1"   | 3.0039885   | 3.1100328   | 3.043221    | 3.127038    | 3.0528224   | 3.041448    | 3.0400302   | 3.1221807   |
| "Astn1"   | 2.2911315   | 2.3638654   | 2.3325355   | 2.4268322   | 2.3347752   | 2.2977774   | 2.3304336   | 2.4354303   |
| "Astn2"   | 2.3817427   | 2.4916904   | 2.4618778   | 2.573214    | 2.4632266   | 2.4328558   | 2.4612477   | 2.5401928   |
| "Asxl1"   | 6.2013517   | 6.6820463   | 5.56619385  | 5.3298874   | 6.41892095  | 6.4621368   | 5.692631    | 5.6317965   |
| "Aszl1"   | 2.667425    | 2.7919815   | 2.7095773   | 2.826718    | 2.722777    | 2.6545157   | 2.717597    | 2.8375742   |
| "Atad1"   | 5.64186285  | 5.6604888   | 5.6779279   | 5.9407356   | 5.820162    | 5.6035393   | 5.7080485   | 5.7337102   |
| "Atad2b"  | 7.96452     | 7.928428    | 7.867568    | 7.8227615   | 8.047126    | 8.665296    | 7.7703648   | 7.941591    |
| "Atad3a"  | 8.74068135  | 8.851269825 | 8.17987595  | 8.566379    | 8.766864925 | 9.11076775  | 8.385072575 | 8.35515     |
| "Atcay"   | 2.69122625  | 2.8572806   | 2.74216975  | 2.84861365  | 2.73065285  | 2.7025233   | 2.79303455  | 2.81793615  |
| "Ate1"    | 2.6551185   | 2.7391025   | 2.65773925  | 2.7135857   | 2.82872765  | 2.76556975  | 2.6715815   | 2.721634    |
| "Atf1"    | 9.310191    | 9.564896    | 9.745117    | 9.964743    | 9.631176    | 9.802659    | 9.658776    | 9.725844    |
| "Atf2"    | 6.4136359   | 6.656520775 | 6.473804525 | 6.535728825 | 6.63962745  | 6.7599964   | 6.447738525 | 6.60779835  |
| "Atf3"    | 8.860957    | 6.5882754   | 6.4357953   | 5.666789    | 5.664934    | 7.7136297   | 6.671737    | 4.8115263   |
| "Atf4"    | 7.574146333 | 8.237553467 | 7.114857567 | 7.4075166   | 7.4491912   | 8.052139333 | 7.0274086   | 7.3408416   |
| "Atf5"    | 7.967454    | 8.110197    | 7.943273    | 7.8868637   | 7.414353    | 8.392358    | 7.902469    | 7.966852    |
| "Atf6"    | 8.261231    | 7.394395    | 7.30247     | 7.261589    | 7.8240995   | 7.9517546   | 7.3716283   | 7.5828056   |

|            |             |             |             |             |             |             |             |             |
|------------|-------------|-------------|-------------|-------------|-------------|-------------|-------------|-------------|
| "Atf6b"    | 3.7003558   | 3.6588469   | 3.5542357   | 3.7731218   | 3.7124164   | 4.2468414   | 3.7494268   | 3.7741134   |
| "Atf7ip"   | 5.9701853   | 6.5795307   | 5.1340404   | 4.9871564   | 6.0623746   | 6.653729    | 5.457733    | 5.0872097   |
| "Atf7ip2"  | 2.39177     | 2.5209064   | 2.4273274   | 2.5581477   | 2.4335349   | 2.387505    | 2.4275305   | 2.5327532   |
| "Atg10"    | 5.3084784   | 5.4599056   | 5.657055    | 6.033402    | 5.207041    | 4.488389    | 5.7876477   | 5.829229    |
| "Atg12"    | 5.2636663   | 5.4346718   | 5.363672167 | 5.601985    | 5.356993633 | 5.426110033 | 5.406843    | 5.522955733 |
| "Atg13"    | 4.8888054   | 5.31163445  | 4.415136    | 4.34668885  | 4.7531407   | 5.14008225  | 4.45136085  | 4.4008935   |
| "Atg14"    | 6.0051937   | 6.7814198   | 5.71346     | 5.5870495   | 6.3948426   | 6.9466763   | 5.6989884   | 6.073038    |
| "Atg16l1"  | 7.5202503   | 8.054147    | 7.2038174   | 7.5789795   | 7.5734296   | 7.723418    | 7.1352572   | 7.6087017   |
| "Atg2a"    | 5.096878    | 5.6053524   | 4.538309    | 4.5595713   | 4.9155707   | 5.4926524   | 4.743989    | 4.7785897   |
| "Atg2b"    | 6.8306017   | 7.129521    | 6.118805    | 6.389797    | 6.928987    | 7.5153027   | 6.5102572   | 6.5231595   |
| "Atg3"     | 6.3921696   | 6.3595519   | 6.3526841   | 6.408309    | 6.3725336   | 6.3343124   | 6.43538035  | 6.45961725  |
| "Atg4b"    | 5.97591255  | 6.46822195  | 6.20692525  | 6.35815925  | 6.1732643   | 6.326877    | 5.78102085  | 6.18893165  |
| "Atg4d"    | 7.2344456   | 7.3581057   | 7.2699933   | 7.4396105   | 7.178856    | 7.1082897   | 7.4329276   | 7.347385    |
| "Atg5"     | 6.341274967 | 5.744966133 | 5.974572667 | 6.166364467 | 5.8911511   | 5.669184867 | 6.17315     | 6.052763633 |
| "Atg7"     | 3.0236087   | 3.0471435   | 4.15357     | 4.2854257   | 3.354743    | 5.2178288   | 3.0112116   | 3.0753849   |
| "Atg9b"    | 2.5743496   | 2.630688    | 2.6049113   | 2.7136846   | 2.6020775   | 2.524578    | 2.6043077   | 2.7020726   |
| "Athl1"    | 3.9653683   | 3.8670251   | 3.9741812   | 4.0681157   | 4.0137863   | 4.0660515   | 4.0588713   | 4.059988    |
| "Atl2"     | 10.5903265  | 10.283488   | 10.6205975  | 10.5152195  | 10.415525   | 9.892492    | 9.892492    | 10.5950085  |
| "Atl3"     | 2.519359433 | 2.596850267 | 2.553970733 | 2.6502006   | 2.567367733 | 2.613587333 | 2.546377333 | 2.6312661   |
| "Atm"      | 5.635088    | 5.163667    | 5.797519    | 5.9703298   | 5.8981204   | 5.9803376   | 5.9417953   | 5.923249    |
| "Atmin"    | 6.147336    | 6.5717373   | 6.65158     | 7.005015    | 6.326063    | 5.9404974   | 7.0464025   | 6.823369    |
| "Atn1"     | 2.3331778   | 2.4014137   | 2.2875042   | 2.4691932   | 2.3728971   | 2.4466834   | 2.3744047   | 2.3731482   |
| "Atoh8"    | 3.4104009   | 2.5516794   | 2.2818375   | 2.5138433   | 2.459865    | 2.416188    | 2.4607012   | 2.5395865   |
| "Atox1"    | 6.801485667 | 6.355841533 | 6.696597233 | 6.491372033 | 6.5157517   | 6.5128138   | 6.945132933 | 6.297804767 |
| "Atp10a"   | 4.0358877   | 4.506258    | 4.230503    | 4.404171    | 4.23518     | 4.2916403   | 4.2308884   | 4.541317    |
| "Atp11a"   | 8.05179     | 7.709318    | 8.557476    | 8.837749    | 7.7970624   | 7.8551226   | 8.850002    | 8.629892    |
| "Atp11b"   | 6.958077    | 6.777422    | 7.1073      | 6.990371    | 6.7794886   | 7.590016    | 6.8473563   | 7.0329885   |
| "Atp11c"   | 2.1825528   | 2.2191243   | 2.1614728   | 2.2414856   | 2.382103    | 2.1726317   | 2.1567183   | 2.2374015   |
| "Atp12a"   | 2.5820088   | 2.6978028   | 2.6256297   | 2.7711008   | 2.6310089   | 2.57164     | 2.6237986   | 2.7337666   |
| "Atp13a1"  | 7.0340734   | 7.1087055   | 6.553317    | 6.33093     | 6.8083363   | 7.2982078   | 6.4807343   | 6.267974    |
| "Atp13a2"  | 4.51165175  | 4.42585755  | 4.5002362   | 4.55018685  | 4.42719865  | 4.6899178   | 4.637545    | 4.5036987   |
| "Atp13a3"  | 5.7601682   | 5.66426295  | 5.344285    | 5.6582195   | 5.69899865  | 5.9173868   | 6.0137156   | 5.76185585  |
| "Atp1a1"   | 10.349553   | 8.816227    | 9.223584    | 9.3767535   | 8.8286885   | 8.9431025   | 9.505658    | 9.216687    |
| "Atp1a2"   | 10.56994375 | 11.41743885 | 10.33475075 | 10.50186893 | 11.3250541  | 11.27175525 | 10.385884   | 10.75099038 |
| "Atp1b1"   | 10.88307038 | 7.991538    | 9.354592    | 10.48532388 | 10.76767975 | 8.413700225 | 10.06099875 | 10.559062   |
| "Atp1b2"   | 5.2467565   | 5.5599686   | 5.74483875  | 5.5671094   | 5.45988265  | 5.0964357   | 5.37652725  | 5.49524325  |
| "Atp1b3"   | 9.651589    | 8.75124     | 9.408966    | 9.079132    | 9.497452    | 9.663102    | 9.618445    | 9.113952    |
| "Atp1b4"   | 6.4814563   | 4.524711    | 5.296941    | 4.9055195   | 4.785534    | 4.119935    | 4.7110395   | 5.41938     |
| "Atp2a1"   | 13.669309   | 14.201382   | 14.199935   | 14.036847   | 14.0002775  | 14.042143   | 13.879438   | 13.997763   |
| "Atp2a2"   | 10.26002715 | 7.551868875 | 8.4656013   | 9.109598125 | 9.944439875 | 8.41959825  | 9.3194639   | 9.49629615  |
| "Atp2a3"   | 3.5773651   | 3.59546635  | 3.7721397   | 3.8225504   | 4.0178515   | 4.68259315  | 3.861578    | 3.8540032   |
| "Atp2b2"   | 2.5172036   | 2.589633    | 2.5567079   | 2.62768     | 2.563746    | 2.5273094   | 2.56397     | 2.6287017   |
| "Atp2c1"   | 7.91150615  | 8.11299385  | 7.6618645   | 7.35507845  | 8.127358    | 7.7006795   | 7.4435396   | 7.7599643   |
| "Atp2c2"   | 2.404216    | 2.46484     | 2.4271312   | 2.4880595   | 2.4263804   | 2.393799    | 2.4230177   | 2.4840736   |
| "Atp4b"    | 2.4598205   | 2.5646095   | 2.538839    | 3.4214265   | 2.5220535   | 2.5187693   | 2.529168    | 2.616703    |
| "Atp5a1"   | 11.50221813 | 11.640691   | 11.63134267 | 11.905824   | 11.73452567 | 11.4892142  | 11.4867919  | 11.813517   |
| "Atp5b"    | 13.383113   | 13.396124   | 13.5840025  | 13.653219   | 13.679526   | 13.371223   | 13.505549   | 13.596391   |
| "Atp5c1"   | 9.253993    | 9.3900343   | 9.5166045   | 9.6278385   | 9.8328282   | 9.4496115   | 9.6307072   | 9.6203688   |
| "Atp5d"    | 11.962539   | 11.9619325  | 12.2370975  | 12.232278   | 12.258319   | 11.8828575  | 12.067289   | 12.067777   |
| "Atp5e"    | 13.341148   | 13.416358   | 13.691851   | 13.698766   | 13.570062   | 13.283664   | 13.487632   | 13.721288   |
| "Atp5f1"   | 13.4484375  | 13.423966   | 13.8058355  | 13.93329875 | 13.8291995  | 13.3876005  | 13.597572   | 13.948177   |
| "Atp5g1"   | 13.228922   | 13.233901   | 13.4531     | 13.618683   | 13.519965   | 13.043075   | 13.283062   | 13.500832   |
| "Atp5g2"   | 7.2801309   | 7.40112235  | 7.3387431   | 7.427342    | 7.3626846   | 7.213756    | 7.4769817   | 7.36339075  |
| "Atp5g3"   | 13.928234   | 13.811648   | 14.134701   | 14.190077   | 14.194848   | 14.000128   | 13.982118   | 14.144306   |
| "Atp5h"    | 13.5221295  | 13.252487   | 13.731044   | 13.9217755  | 13.711006   | 13.44550625 | 13.5729735  | 13.9430615  |
| "Atp5j"    | 12.629103   | 12.537711   | 13.108501   | 13.286713   | 12.979694   | 12.680697   | 12.928338   | 13.232165   |
| "Atp5j2"   | 13.24612075 | 13.253546   | 13.5480895  | 13.612029   | 13.42794    | 13.240227   | 13.4176775  | 13.5687145  |
| "Atp5k"    | 12.36951967 | 12.51966267 | 12.932023   | 13.021613   | 12.78503567 | 12.594543   | 12.66157233 | 12.98045733 |
| "Atp5l"    | 13.393801   | 13.541023   | 13.46945    | 13.634074   | 13.644007   | 13.471365   | 13.471948   | 13.613105   |
| "Atp5o"    | 12.4862325  | 12.62366    | 12.965195   | 13.410824   | 12.8223545  | 12.4065005  | 12.727231   | 13.51316    |
| "Atp5s"    | 6.6567907   | 6.947807    | 7.2042685   | 7.358       | 6.6882463   | 7.045595    | 7.272952    | 7.460731    |
| "Atp5sl"   | 7.1956573   | 7.228838    | 7.15435     | 7.5854588   | 7.319842    | 7.1546483   | 6.964855    | 7.4620605   |
| "Atp6ap1"  | 9.566026    | 9.636091    | 10.095683   | 9.805287    | 9.734658    | 9.697998    | 9.7478285   | 9.77967     |
| "Atp6ap2"  | 10.27874433 | 9.271115    | 8.98722     | 8.616159833 | 9.602575667 | 10.233588   | 9.224060667 | 8.735057667 |
| "Atp6v0a1" | 3.9488548   | 4.02284025  | 4.1081139   | 4.0690987   | 3.8059735   | 4.45794685  | 3.8993845   | 3.93742695  |
| "Atp6v0a2" | 4.678280533 | 5.029332    | 4.968251033 | 5.1204511   | 4.8490262   | 4.921497633 | 4.993764933 | 5.056502767 |
| "Atp6v0b"  | 5.4718262   | 5.5906312   | 5.660928867 | 5.672412233 | 5.5179327   | 5.507359167 | 5.620091433 | 5.631818333 |
| "Atp6v0c"  | 10.41313867 | 10.3312405  | 10.467069   | 10.355049   | 10.42452383 | 10.28366867 | 10.67208467 | 10.269943   |
| "Atp6v0d1" | 9.7350445   | 9.382414    | 8.874986    | 8.724218    | 9.310779    | 9.3582115   | 9.26941     | 8.794704    |
| "Atp6v0e"  | 9.264187    | 9.315052    | 8.654676    | 8.270157    | 9.32537     | 9.805321    | 8.921316    | 8.229682    |
| "Atp6v0e2" | 8.451412    | 8.883722    | 8.757369    | 8.602262    | 8.638114    | 8.125606    | 8.133256    | 8.540013    |
| "Atp6v1a"  | 8.1943735   | 7.77232     | 7.5758675   | 7.2936545   | 7.67811915  | 8.0415155   | 8.16179975  | 7.52293445  |
| "Atp6v1b2" | 7.57545375  | 7.1308775   | 6.49764315  | 7.0526687   | 6.9391291   | 7.279316    | 6.9683442   | 6.7415877   |
| "Atp6v1c1" | 7.787525    | 8.172332    | 7.7619437   | 8.006987433 | 8.025519333 | 8.029101767 | 8.3297522   | 8.0191888   |
| "Atp6v1d"  | 10.20347917 | 10.45751167 | 10.39107    | 10.594758   | 10.379121   | 10.16258133 | 10.48502183 | 10.57814883 |
| "Atp6v1e1" | 7.08436815  | 7.056172    | 7.0531039   | 7.0901013   | 7.106869    | 7.2196321   | 7.1167743   | 7.16011425  |
| "Atp6v1e2" | 2.7494185   | 2.9341083   | 2.8339958   | 2.9025645   | 2.8382282   | 2.7617126   | 2.8312142   | 2.8546274   |
| "Atp6v1f"  | 11.028159   | 10.993505   | 10.898076   | 10.94143    | 10.845538   | 10.65594    | 11.023313   | 10.760839   |
| "Atp6v1g1" | 9.0442056   | 8.969625467 | 9.302756267 | 9.210185733 | 8.972412333 | 8.690463    | 9.464777867 | 9.1536496   |
| "Atp6v1g2" | 2.324265    | 2.4198122   | 2.3706894   | 2.4725723   | 2.3746657   | 2.3219924   | 2.4466283   | 2.465987    |
| "Atp6v1h"  | 9.221744    | 10.445971   | 7.5029364   | 7.6051545   | 9.193211    | 10.445925   | 8.036114    | 7.6784053   |

|                 |             |             |             |             |             |             |             |             |
|-----------------|-------------|-------------|-------------|-------------|-------------|-------------|-------------|-------------|
| "Atp7a"         | 6.41273065  | 6.4201592   | 6.614361    | 6.6812065   | 6.54996375  | 6.4380755   | 6.73194385  | 6.6056328   |
| "Atp7b"         | 2.5648469   | 2.62309035  | 2.58631595  | 2.6655713   | 2.59222015  | 2.5599323   | 2.58859785  | 2.6741556   |
| "Atp8a1"        | 5.85491465  | 6.2659343   | 6.1556301   | 6.18345515  | 5.67322685  | 5.7828775   | 5.9072721   | 6.03499885  |
| "Atp8a2"        | 2.459337    | 2.539308    | 2.539257    | 2.552739    | 2.52964     | 2.217638    | 2.497708    | 2.46447     |
| "Atp9a"         | 6.44643225  | 5.3564134   | 6.0468147   | 5.79932095  | 6.1568535   | 5.8297517   | 6.8618905   | 5.7262088   |
| "Atp9b"         | 5.4938173   | 5.595911    | 5.610426    | 5.4185886   | 5.5351973   | 5.4101477   | 5.644452    | 5.508937    |
| "Atpaf2"        | 6.417009    | 6.26927     | 6.631237    | 6.531955    | 6.4776607   | 6.32222     | 7.231977    | 6.555669    |
| "Atpdb4"        | 5.3644      | 5.7628107   | 5.9189763   | 5.947969    | 5.8361654   | 5.725246    | 6.0533433   | 6.050187    |
| "Atpif1"        | 6.14800895  | 6.0899687   | 6.3287545   | 6.2890378   | 6.11603415  | 5.88490185  | 6.34791925  | 6.3910488   |
| "Atr"           | 5.5879946   | 5.975572    | 5.9239736   | 5.3721285   | 5.8385797   | 5.650975    | 5.766767    | 5.8670373   |
| "Atrip"         | 6.941857    | 6.8465433   | 6.788213    | 6.478862    | 6.890788    | 7.0117297   | 7.128781    | 6.4726944   |
| "Atrx"          | 4.46700294  | 4.5623696   | 4.88572076  | 4.67273332  | 4.6976668   | 4.87151052  | 4.83019768  | 4.71672802  |
| "Atxn1"         | 2.2859216   | 2.3582609   | 2.3116283   | 2.424909    | 2.3414586   | 2.2870517   | 2.341739    | 2.4324212   |
| "Atxn10"        | 7.164035575 | 6.86706375  | 7.25275125  | 7.12623475  | 7.26180215  | 7.17531205  | 7.256137    | 7.1835911   |
| "Atxn2"         | 7.741359567 | 7.534203867 | 7.869251133 | 8.438994667 | 7.886508233 | 7.440097167 | 7.740426333 | 8.467870333 |
| "Atxn7"         | 4.6501365   | 5.250617    | 5.013688    | 4.9487376   | 4.825982    | 4.551722    | 4.8130007   | 4.5642095   |
| "Atxn7l1"       | 4.630502    | 4.512599    | 4.6858783   | 5.192296    | 4.6150155   | 4.580343    | 4.8509355   | 4.9021816   |
| "Atxn7l3"       | 6.3421407   | 6.601498    | 6.1458178   | 6.677904    | 6.5599847   | 6.704084    | 6.7150693   | 6.591771    |
| "Atxn7l3b"      | 8.318647625 | 8.032973125 | 8.016192925 | 7.598365    | 8.02517475  | 8.448135    | 7.87304035  | 7.707688125 |
| "AU020206"      | 4.840019    | 5.1073117   | 5.85181     | 6.4230056   | 6.089278    | 7.4294667   | 6.628287    | 6.683612    |
| "AU040096"      | 3.1648455   | 3.494456    | 3.3462846   | 3.541917    | 3.354983    | 3.2569287   | 3.3430088   | 3.4804914   |
| "AU040320"      | 7.2151175   | 7.923023    | 7.9614778   | 7.7109256   | 7.6164586   | 7.3882885   | 7.723441    | 7.6261277   |
| "Auh"           | 4.552408067 | 4.788677367 | 4.7234393   | 4.783874667 | 4.906597933 | 4.636540033 | 4.700322533 | 4.81252867  |
| "Aup1"          | 8.240839    | 8.124796    | 8.026685    | 7.807317    | 7.803301    | 8.00246     | 8.604599    | 7.8842077   |
| "Aurka"         | 2.4506207   | 3.233168    | 5.3568      | 6.3081546   | 2.742663    | 2.8113267   | 3.120602    | 5.502838    |
| "Aurkaip1"      | 10.408162   | 10.446244   | 10.767933   | 10.686893   | 10.512614   | 10.490081   | 10.770204   | 10.670978   |
| "Aurb"          | 3.116456    | 3.439819    | 3.272815    | 3.4899018   | 3.289025    | 3.1662126   | 3.26108     | 3.4111502   |
| "Aut52"         | 4.9933463   | 6.0717223   | 5.458867567 | 5.551093433 | 5.096506433 | 5.555714233 | 4.7034499   | 5.0221746   |
| "AV320801"      | 3.034097    | 3.1474714   | 3.0707877   | 3.1990514   | 3.0735264   | 2.9728897   | 3.0664465   | 3.1596599   |
| "Avil"          | 6.592291    | 6.2419915   | 5.9838204   | 4.7375383   | 6.2164936   | 6.7812114   | 7.090004    | 6.201844    |
| "Avl9"          | 5.10787     | 5.2910843   | 4.8612194   | 5.1718616   | 5.283371    | 5.8957367   | 4.901724    | 5.1762114   |
| "Avp"           | 2.371848    | 2.423789    | 2.3782594   | 2.482663    | 2.3999841   | 2.3238573   | 2.376206    | 2.411686    |
| "Avpi1"         | 8.3908205   | 7.811418    | 7.7676177   | 7.9228635   | 7.845182    | 7.2449603   | 8.092497    | 7.556497    |
| "Avpr1a"        | 5.84603835  | 2.6514678   | 2.58435775  | 2.642361    | 2.57807315  | 2.5602275   | 2.5704808   | 2.636029    |
| "AW112010"      | 9.752329    | 6.3615274   | 8.097874    | 8.24702     | 8.030745    | 8.1517      | 8.850943    | 8.535245    |
| "AW121686"      | 2.5181892   | 2.5889099   | 2.5483782   | 2.6451578   | 2.5511339   | 2.5146484   | 2.5461264   | 2.6616576   |
| "AW209491"      | 7.908643    | 8.190251    | 8.160685    | 8.450916    | 8.455836    | 7.757057    | 8.235437    | 8.02581     |
| "AW549877"      | 8.150196    | 8.028982    | 7.5800076   | 7.4679193   | 8.276568    | 8.392445    | 7.7654467   | 7.877331    |
| "Axin1"         | 4.67134845  | 4.74598185  | 4.6562957   | 4.7202456   | 4.5543848   | 4.6496901   | 4.4659095   | 4.6543875   |
| "Axin2"         | 4.279354    | 6.3004456   | 4.904169    | 5.0156374   | 5.205226    | 5.334811    | 4.756952    | 4.9716425   |
| "Axl"           | 5.0053761   | 4.6427468   | 5.2803211   | 5.1171715   | 5.0417225   | 5.23380265  | 5.0114061   | 5.14480635  |
| "AY036118"      | 8.754064    | 8.9802      | 9.645468    | 9.734402    | 8.939325    | 8.99432     | 8.998959    | 9.618989    |
| "Aym1"          | 2.378439    | 2.4500153   | 2.4284332   | 2.503293    | 2.549334    | 2.4012637   | 2.4148986   | 2.4964044   |
| "Azgp1"         | 11.238541   | 2.6133308   | 5.522205    | 2.5505574   | 3.9181912   | 2.464193    | 2.3208783   | 3.6261683   |
| "Azi1"          | 5.556826    | 5.155206    | 4.5455537   | 4.2964926   | 4.700601    | 4.465507    | 5.469879    | 4.2728624   |
| "Azi2"          | 7.50587125  | 7.6401203   | 7.5007358   | 7.614586    | 7.43874875  | 7.51298715  | 7.3178252   | 7.69234275  |
| "Azin1"         | 7.08415915  | 6.3475188   | 7.97442135  | 8.17253625  | 7.11130045  | 7.26788805  | 7.8854945   | 7.607662    |
| "B130024G19Rik" | 3.3569329   | 3.9142473   | 3.6169894   | 3.7270536   | 3.6475432   | 3.4165423   | 3.5347855   | 3.641131    |
| "B230118H07Rik" | 10.563268   | 11.124044   | 11.271624   | 11.383771   | 10.787983   | 10.343753   | 11.047596   | 11.077167   |
| "B230120H23Rik" | 3.6813334   | 3.7556702   | 3.62294885  | 4.1137895   | 3.7453003   | 3.5517287   | 3.6306254   | 3.60414585  |
| "B230219D22Rik" | 9.810326    | 10.32209    | 10.447543   | 10.423948   | 10.166574   | 10.380203   | 10.215038   | 10.147535   |
| "B230308N11Rik" | 7.03449925  | 6.997602    | 7.408535    | 7.5785935   | 7.314707    | 7.48636385  | 7.25463535  | 7.58833625  |
| "B230312A22Rik" | 7.104378    | 7.3727922   | 5.901874    | 6.4523287   | 7.2882414   | 7.6197314   | 6.5845327   | 6.197058    |
| "B230354K17Rik" | 8.38143075  | 9.193254    | 7.976499    | 7.8350865   | 8.7931215   | 9.153593    | 8.04129675  | 8.1268118   |
| "B230354O11Rik" | 2.5189867   | 2.7080967   | 2.5860415   | 2.6757374   | 2.587366    | 2.523674    | 2.5738626   | 2.689783    |
| "B2m"           | 13.036749   | 10.769872   | 11.9356135  | 11.428434   | 12.339709   | 12.434767   | 12.8686395  | 11.739001   |
| "B3galnt1"      | 4.6699767   | 4.061922    | 5.972248    | 5.687393    | 5.7183166   | 5.8672233   | 6.1703362   | 5.822376    |
| "B3galnt2"      | 8.9098165   | 8.234572    | 10.0545435  | 10.494219   | 8.3367995   | 8.3991085   | 10.031211   | 10.3514785  |
| "B3galt1"       | 2.4515326   | 2.451519    | 2.448752    | 2.5654082   | 2.4586995   | 2.381842    | 2.5207226   | 2.5564988   |
| "B3galt2"       | 3.44234515  | 3.86044685  | 3.7233212   | 3.8324882   | 3.8415805   | 3.89569305  | 4.35610555  | 4.0700903   |
| "B3galt4"       | 2.33471     | 2.3859427   | 2.3781567   | 2.4518886   | 2.374936    | 2.3611856   | 2.373275    | 2.422448    |
| "B3galt6"       | 2.5185682   | 2.61102255  | 2.5959777   | 2.74314825  | 2.6348206   | 2.52148405  | 2.89251505  | 2.64150045  |
| "B3gat1"        | 2.490499    | 2.6243391   | 2.567060967 | 2.666232367 | 2.568695067 | 2.517702933 | 2.559687267 | 2.6301953   |
| "B3gat3"        | 4.17025615  | 4.429276    | 4.3986723   | 4.3066473   | 4.372632    | 4.529266    | 4.33977185  | 4.25127505  |
| "B3gnt1"        | 6.4006114   | 6.398243    | 7.400667    | 7.4102554   | 7.007443    | 6.291079    | 6.8439097   | 6.959055    |
| "B3gnt2"        | 3.90803945  | 4.1265054   | 4.04523185  | 4.1856494   | 3.99766955  | 4.5170719   | 4.0664134   | 3.9448525   |
| "B3gnt5"        | 2.4074457   | 2.52054535  | 2.4702691   | 2.57546345  | 2.4679418   | 3.21234965  | 2.4727387   | 2.5602249   |
| "B3gnt9-ps"     | 2.9702415   | 3.1079419   | 3.1695123   | 3.51596     | 3.1642048   | 3.019492    | 3.3290455   | 3.520392    |
| "B4galnt1"      | 2.4090617   | 1.9899106   | 1.9782594   | 2.0519235   | 1.982175    | 2.2935662   | 1.9653889   | 2.0439982   |
| "B4galt1"       | 7.7580657   | 7.8960023   | 7.0263414   | 7.0646553   | 7.7727904   | 8.770344    | 7.2452326   | 6.4176927   |
| "B4galt2"       | 2.4898565   | 2.621983    | 2.8745093   | 2.7270374   | 2.5719066   | 2.4974406   | 3.0856683   | 2.6783729   |
| "B4galt3"       | 5.2357063   | 5.8920527   | 4.407682    | 4.4394393   | 4.8944607   | 5.8897686   | 4.9327345   | 4.7543745   |
| "B4galt4"       | 3.8878057   | 3.976703    | 3.918477    | 4.0571027   | 4.438149    | 3.9914787   | 3.919017    | 3.9868255   |
| "B4galt6"       | 3.942721    | 2.668366667 | 3.880589767 | 3.278683067 | 3.2820644   | 3.425584933 | 3.812986533 | 3.75612725  |
| "B4galt7"       | 4.21968685  | 4.3308273   | 4.4170735   | 4.4502788   | 4.39803675  | 4.39298285  | 4.2559669   | 4.4197136   |
| "B930003M22Rik" | 3.4106066   | 3.9122229   | 3.5859191   | 3.8122146   | 3.5923226   | 3.4289227   | 3.5394254   | 3.6993835   |
| "B930041F14Rik" | 2.7615042   | 2.9335327   | 2.9250035   | 2.8533623   | 2.8519635   | 2.987394    | 2.8509598   | 2.911379    |
| "B9d1"          | 2.9866178   | 3.0499787   | 3.014629    | 3.8791747   | 2.7511866   | 2.7287312   | 3.1720538   | 3.1179698   |
| "B9d2"          | 3.641224    | 3.6542587   | 3.473384    | 3.6002753   | 3.6258893   | 3.747163    | 3.6254075   | 3.6717017   |
| "Baalc"         | 2.4937725   | 2.2708538   | 2.2499611   | 2.3133337   | 2.2260578   | 2.179289    | 2.3750908   | 2.2863348   |
| "Baat"          | 4.90998215  | 2.90379725  | 2.8261746   | 2.9588655   | 2.82248365  | 2.7113378   | 2.80962095  | 2.91578185  |

|            |             |             |             |             |             |             |             |             |
|------------|-------------|-------------|-------------|-------------|-------------|-------------|-------------|-------------|
| "Baat1"    | 4.95305395  | 5.15454575  | 4.9900083   | 4.9728735   | 5.34282435  | 5.17546775  | 5.01472065  | 5.0661538   |
| "Bace1"    | 4.481589325 | 4.384502075 | 5.594412575 | 6.109833875 | 4.633453125 | 4.317780025 | 5.4385549   | 5.3852262   |
| "Bace2"    | 2.4879043   | 2.53812125  | 2.73379385  | 2.6042613   | 2.53344425  | 2.42483245  | 2.52851925  | 2.61202615  |
| "Bach1"    | 8.6053585   | 8.754823    | 7.005422    | 7.44943275  | 7.7664055   | 8.7835105   | 6.81969225  | 7.2726625   |
| "Bach2"    | 5.6427946   | 6.657008    | 3.3094835   | 3.0061185   | 3.9398756   | 6.739199    | 3.172221    | 3.007993    |
| "Bad"      | 6.25462585  | 6.3583394   | 6.523577    | 6.25620915  | 6.30055515  | 6.06888015  | 6.48757715  | 6.16614175  |
| "Bag1"     | 11.168453   | 11.110229   | 11.424758   | 11.323013   | 11.177097   | 10.881667   | 11.545383   | 11.326474   |
| "Bag2"     | 5.698901    | 5.7215314   | 7.092392    | 7.3218155   | 6.4051995   | 5.5512123   | 6.940377    | 7.4452076   |
| "Bag3"     | 10.343924   | 10.252844   | 9.928075    | 10.185898   | 10.350119   | 10.610937   | 10.07747    | 10.539023   |
| "Bag4"     | 3.26117185  | 3.34713505  | 3.19342135  | 3.1180978   | 3.65991865  | 3.78377435  | 3.3589255   | 3.2343483   |
| "Bag5"     | 7.704942    | 8.227305    | 7.2025957   | 7.1705523   | 7.6181426   | 7.883372    | 7.0357337   | 7.0395455   |
| "Bag6"     | 7.720618    | 8.58789     | 7.999598    | 8.206178    | 7.644423    | 7.5296907   | 7.842194    | 8.06377     |
| "Bai1"     | 2.5850072   | 3.2973304   | 2.6081967   | 2.7083564   | 2.621793    | 2.579814    | 2.6107578   | 2.685214    |
| "Baiap2"   | 2.6263804   | 2.4686294   | 2.4113412   | 2.528758    | 2.4198718   | 2.4032953   | 2.4123077   | 2.505675    |
| "Baiap211" | 5.2555488   | 2.4043608   | 2.36627585  | 2.43545295  | 2.4034994   | 2.3122399   | 2.37564095  | 2.4502486   |
| "Bak1"     | 4.4284496   | 4.4692793   | 4.347464    | 4.712282    | 4.180347    | 4.4495955   | 4.983596    | 4.51295     |
| "Bambi"    | 3.8927653   | 3.0911326   | 3.4162874   | 3.6706343   | 3.54524     | 3.4361758   | 3.5351088   | 4.2013216   |
| "Banf1"    | 10.23886333 | 10.22395533 | 10.234182   | 10.154284   | 10.06786433 | 9.714633    | 10.31202167 | 10.08560133 |
| "Banp"     | 2.642507    | 2.5160513   | 3.1737785   | 2.3698068   | 2.4653308   | 2.9305968   | 2.7479942   | 2.4829884   |
| "Bap1"     | 8.1484615   | 8.8511672   | 8.126856    | 8.3285005   | 8.129544    | 8.4452275   | 8.172095    | 8.204483    |
| "Barhl1"   | 2.500606    | 2.649245    | 2.5478137   | 2.7107964   | 2.5592747   | 2.5045118   | 2.5605052   | 2.6644135   |
| "Barx2"    | 2.6330438   | 2.5938408   | 2.4875622   | 2.708375    | 2.6334615   | 2.4309008   | 2.6707652   | 3.4857116   |
| "Basp1"    | 4.6255074   | 2.6852446   | 5.8644686   | 4.61888     | 3.2824547   | 4.4994936   | 4.641759    | 4.6156154   |
| "Batf"     | 3.351904    | 3.480706    | 3.4035969   | 3.4765787   | 3.4156277   | 3.4367282   | 3.4136055   | 3.446276    |
| "Batf2"    | 2.5137014   | 2.5476327   | 2.5001938   | 2.5571556   | 2.5273943   | 2.4910355   | 2.5225859   | 2.846147    |
| "Bax"      | 6.7266116   | 5.695406    | 5.8163867   | 5.2550063   | 5.268115    | 6.136187    | 5.9644775   | 5.686823    |
| "Baz1b"    | 4.217843367 | 4.224365033 | 4.1756456   | 4.311851933 | 4.313638    | 4.399744133 | 4.509145033 | 4.6146784   |
| "Baz2a"    | 4.920464067 | 5.105591267 | 4.917388233 | 4.940497    | 5.056842    | 5.048935767 | 5.002249333 | 4.959981133 |
| "Baz2b"    | 8.193059    | 8.247909    | 7.6994853   | 7.906507    | 8.48332     | 8.432923    | 8.002861    | 8.269738    |
| "BB283400" | 2.262683    | 2.3348987   | 2.309848    | 2.432949    | 2.3079655   | 2.2222772   | 2.5297437   | 2.3590662   |
| "BB287469" | 2.683023    | 3.3081498   | 2.8081255   | 2.858129    | 2.8441207   | 2.6739602   | 2.7548068   | 2.808765    |
| "Bbc3"     | 5.1572084   | 3.9430218   | 3.7783844   | 3.8385684   | 3.7985055   | 3.691393    | 3.7748919   | 3.6961687   |
| "Bbip1"    | 7.5076914   | 7.52402     | 7.9274197   | 7.7108545   | 7.837112    | 8.061212    | 7.909558    | 7.931236    |
| "Bbox1"    | 5.7273703   | 2.1411638   | 3.2560554   | 2.1321445   | 2.0829165   | 2.0290897   | 2.0750356   | 2.1402361   |
| "Bbs2"     | 3.982396    | 3.8315477   | 3.9568312   | 3.4963186   | 3.957695    | 4.421295    | 4.066554    | 3.8478787   |
| "Bbs9"     | 3.8115544   | 4.0986466   | 4.370442    | 4.028515    | 4.3398414   | 3.948561    | 3.5508456   | 3.8853998   |
| "Bbx"      | 3.145446833 | 3.1060811   | 3.521231967 | 3.378231633 | 3.2145183   | 3.489645633 | 3.562078067 | 3.419852867 |
| "BC001981" | 3.0503035   | 3.1220937   | 3.3550963   | 3.0383656   | 3.0626547   | 3.044604    | 3.0573208   | 3.1131072   |
| "BC002059" | 4.897468    | 5.2193274   | 5.1562138   | 5.151179    | 5.1996965   | 5.134075    | 5.3279767   | 5.584157    |
| "BC002163" | 12.419755   | 12.54471    | 12.743078   | 13.132576   | 12.719829   | 12.301713   | 12.836324   | 12.986402   |
| "BC002189" | 5.07059     | 6.756201    | 6.8732467   | 7.031569    | 6.486874    | 5.775632    | 6.5559034   | 7.0536675   |
| "BC002230" | 5.348811    | 6.755116    | 5.477695    | 5.9352384   | 5.96295     | 5.865851    | 5.4363604   | 5.850958    |
| "BC003266" | 7.044254    | 7.7514486   | 7.652608    | 7.853274    | 7.103651    | 7.8027196   | 7.6008577   | 7.8368306   |
| "BC003331" | 8.0260845   | 8.368379    | 7.969897    | 8.02291325  | 8.1167755   | 8.03800365  | 8.202098    | 7.99923125  |
| "BC003965" | 6.8823675   | 7.1344592   | 7.36868135  | 7.48385775  | 6.9439545   | 6.577565    | 7.3572955   | 7.43592175  |
| "BC004004" | 7.794840875 | 8.07200855  | 8.2070006   | 8.219232575 | 7.88539825  | 7.55001375  | 8.327868325 | 7.99331085  |
| "BC005512" | 3.66317155  | 3.7058787   | 3.6201319   | 3.5538969   | 3.3990624   | 3.258741    | 3.44238945  | 3.55540865  |
| "BC005537" | 7.5210965   | 7.841094    | 6.48879315  | 6.38736485  | 7.0455954   | 8.1612858   | 6.57025585  | 6.4695115   |
| "BC005561" | 3.0680916   | 4.2601566   | 3.0203156   | 3.076933    | 2.5750074   | 3.956906    | 3.0776772   | 3.1556416   |
| "BC005624" | 4.3856936   | 4.51256215  | 4.4147934   | 4.46365695  | 4.23853585  | 4.37440485  | 4.35676155  | 4.5366625   |
| "BC005685" | 2.314344    | 2.6887515   | 2.4555564   | 2.6232152   | 2.468159    | 2.4132218   | 2.4832041   | 2.5291443   |
| "BC006779" | 7.1379995   | 5.329997    | 5.100487    | 5.17428     | 5.4253554   | 6.894869    | 5.9696217   | 5.642424    |
| "BC006965" | 2.313356    | 2.4738846   | 2.3494718   | 2.458185    | 2.3520205   | 2.3051863   | 2.3510597   | 2.4280772   |
| "BC013529" | 10.1733235  | 10.5464705  | 10.64253625 | 10.45038    | 10.653198   | 10.1071285  | 11.02637    | 10.574373   |
| "BC013712" | 3.2516592   | 3.2678156   | 3.2669399   | 3.0805776   | 3.2737658   | 4.0953064   | 3.3745513   | 3.282273    |
| "BC016423" | 6.143457    | 7.0852895   | 6.917158    | 6.991177    | 6.976431    | 6.5811996   | 6.6400156   | 7.5160656   |
| "BC016548" | 2.6512764   | 2.8260128   | 2.7388875   | 2.8328338   | 2.7440937   | 2.6988325   | 2.7361007   | 2.830162    |
| "BC016579" | 2.4174352   | 2.5510495   | 2.4611876   | 2.5741591   | 2.4683244   | 2.4109342   | 2.4607382   | 2.5623887   |
| "BC017158" | 2.9914985   | 2.4964547   | 3.128302    | 2.891189    | 3.209309    | 2.989844    | 3.439111    | 3.054712    |
| "BC017612" | 3.4178975   | 3.2808805   | 5.2173295   | 4.902669    | 3.833017    | 4.3850365   | 4.719849    | 4.529402    |
| "BC017643" | 5.1451945   | 4.1457148   | 5.4374304   | 5.485901    | 5.466278    | 6.2898693   | 5.5152283   | 5.501159    |
| "BC017647" | 3.240316    | 3.3958835   | 3.2795815   | 3.6157063   | 3.15659055  | 3.3519764   | 3.51502765  | 3.4189103   |
| "BC018242" | 2.4680686   | 2.573939    | 2.5246005   | 2.6399302   | 2.5265336   | 2.4589696   | 2.5222573   | 2.5977626   |
| "BC018473" | 2.40707755  | 2.50050295  | 2.4465407   | 2.5503294   | 2.45522265  | 2.4223114   | 2.4504687   | 2.53900525  |
| "BC018507" | 8.3870555   | 8.7265185   | 8.195793    | 8.2005165   | 8.4879255   | 8.7285015   | 8.0348285   | 8.2504025   |
| "BC020535" | 4.541047    | 4.807318    | 4.487161    | 4.864597    | 4.817453    | 4.7282414   | 4.38318     | 4.9776106   |
| "BC021614" | 2.3176973   | 2.3715534   | 2.3411036   | 2.4236443   | 2.3342657   | 2.3064864   | 2.3207207   | 2.4157481   |
| "BC022687" | 2.7505035   | 2.9019387   | 2.7996016   | 2.9282722   | 2.803547    | 2.7500203   | 2.7947845   | 2.8961945   |
| "BC022960" | 2.5704534   | 3.2415237   | 2.6104894   | 2.7942677   | 2.624783    | 2.5564857   | 2.610316    | 2.7156444   |
| "BC023105" | 6.0576754   | 6.4287877   | 5.817027    | 7.5361195   | 6.167249    | 6.422199    | 6.4759808   | 6.8155003   |
| "BC023829" | 8.132736    | 7.961614    | 9.310593    | 9.2525625   | 8.469027    | 8.145009    | 8.793316    | 8.871114    |
| "BC024137" | 2.497052    | 2.5394917   | 2.512373    | 2.5913177   | 2.5211198   | 2.480913    | 2.5143082   | 2.5932183   |
| "BC024139" | 2.615373    | 2.6980828   | 2.64446     | 2.7387292   | 2.5743012   | 2.6221507   | 2.6431396   | 2.7054932   |
| "BC024479" | 5.803121    | 6.076444    | 6.247008    | 5.8185124   | 6.250785    | 6.2533917   | 6.171666    | 6.3272333   |
| "BC025446" | 4.0013947   | 2.0686412   | 2.0406127   | 2.0979285   | 2.0235598   | 1.9991252   | 2.0171616   | 2.097379    |
| "BC025933" | 2.7076693   | 2.7749712   | 2.7313933   | 2.83481     | 2.7477188   | 2.70766     | 2.7327342   | 2.8154159   |
| "BC027231" | 4.9224133   | 5.1539536   | 3.7653208   | 4.6054792   | 4.934324    | 5.4048133   | 4.469801    | 4.7476068   |
| "BC028528" | 4.5752916   | 4.2395067   | 4.771903    | 4.771139    | 4.743128    | 5.0223193   | 4.838156    | 4.7223864   |
| "BC028777" | 2.7852848   | 2.839164    | 2.8066354   | 2.8861384   | 2.8107123   | 2.7878182   | 2.8027663   | 2.878896    |
| "BC029722" | 7.3055363   | 7.3812943   | 7.9385967   | 8.08078     | 7.637435    | 7.375389    | 8.018872    | 7.940421    |
| "BC031181" | 8.751973    | 8.215631    | 9.020384    | 8.847772    | 8.509101    | 8.594438    | 9.14878     | 8.85952     |

|            |             |             |             |             |             |             |             |             |
|------------|-------------|-------------|-------------|-------------|-------------|-------------|-------------|-------------|
| "BC037034" | 3.142694    | 3.150145    | 3.1485748   | 3.1887782   | 3.144828    | 3.1336284   | 3.1448817   | 3.180455    |
| "BC046331" | 6.782489    | 7.476724    | 7.315061    | 7.626481    | 7.025       | 7.1224275   | 6.9369607   | 7.75495     |
| "BC048355" | 4.65432     | 5.055523    | 5.6913347   | 5.6433496   | 4.2787843   | 4.5119066   | 5.1039753   | 6.001293    |
| "BC048403" | 3.0169349   | 3.2165318   | 3.0594368   | 3.296414    | 3.0991173   | 3.0564842   | 3.0809305   | 3.2265136   |
| "BC051019" | 2.790954    | 2.9912875   | 2.8887491   | 3.057045    | 2.8942447   | 2.8063676   | 2.8680005   | 3.0138426   |
| "BC053393" | 2.2911284   | 2.4767833   | 2.4019964   | 2.4930267   | 2.4156446   | 2.3377645   | 2.4026136   | 2.5260122   |
| "BC056474" | 3.498203    | 3.6617131   | 4.1444864   | 3.998004    | 3.6918879   | 3.2331352   | 3.6562595   | 3.856223    |
| "BC089491" | 2.1669846   | 2.6359673   | 2.201198    | 2.2767541   | 2.208096    | 2.1917253   | 2.208243    | 2.2797673   |
| "BC089597" | 8.154898    | 2.5537324   | 2.606648    | 2.566452    | 2.5082946   | 2.4240532   | 2.498899    | 2.5771496   |
| "BC090627" | 8.763119    | 9.115074    | 9.039103    | 9.294888    | 9.535014    | 8.640537    | 8.732157    | 9.436163    |
| "BC094435" | 13.11018575 | 13.393893   | 12.150506   | 11.5322165  | 12.88546    | 13.588939   | 12.123964   | 12.3630805  |
| "BC096441" | 4.6896897   | 4.1262899   | 4.6088762   | 4.499712    | 4.7946077   | 4.9030304   | 5.037652    | 4.83025165  |
| "BC147527" | 3.5490482   | 4.1380877   | 3.812642    | 4.0523887   | 3.860592    | 3.7954795   | 3.7956114   | 3.9220746   |
| "Bcap29"   | 8.762825    | 9.713303    | 9.529354    | 9.62579     | 9.498829    | 9.071949    | 9.229339    | 9.474155    |
| "Bcap31"   | 9.4634005   | 9.0766825   | 9.7882685   | 9.3482995   | 9.8256005   | 9.691901    | 10.415714   | 9.631613    |
| "Bcar1"    | 5.992378    | 5.9773063   | 6.28563955  | 6.02280635  | 6.0762482   | 5.80366215  | 6.21713305  | 5.87859465  |
| "Bcar3"    | 6.6782365   | 5.170059    | 5.8199844   | 5.5620947   | 6.42737     | 6.8978057   | 6.451258    | 5.8952694   |
| "Bcas2"    | 5.231070333 | 5.4211596   | 5.487954733 | 5.7276232   | 5.222059067 | 4.877361267 | 5.224374867 | 5.881771067 |
| "Bcas3"    | 4.3291462   | 4.57076865  | 4.2873752   | 4.3568289   | 4.2954847   | 4.28424695  | 4.2234683   | 4.364812201 |
| "Bcat1"    | 2.3899424   | 2.4570382   | 2.4314065   | 2.5048034   | 2.4423587   | 2.4189022   | 2.4343293   | 2.4822205   |
| "Bcat2"    | 3.7498465   | 3.818181    | 3.8022392   | 3.9081483   | 3.8053067   | 3.7872133   | 3.996557    | 3.8653169   |
| "Bccip"    | 10.338825   | 10.686003   | 10.998363   | 11.084507   | 10.467201   | 10.327234   | 10.754747   | 11.044291   |
| "Bcdin3d"  | 5.4681506   | 6.886474    | 5.0971937   | 5.780837    | 5.911151    | 6.1900063   | 4.9846983   | 6.16083     |
| "Bche"     | 2.5682477   | 2.68748865  | 2.6256374   | 2.7480445   | 2.8444859   | 2.58427765  | 2.6374792   | 2.72521995  |
| "Bckdha"   | 8.935427    | 9.635632    | 8.703746    | 8.934469    | 9.46412     | 9.488858    | 8.594975    | 9.103741    |
| "Bckdha"   | 9.649321    | 9.202447    | 9.335838    | 8.75162     | 9.707585    | 9.6364765   | 9.9077835   | 9.194538    |
| "Bckdk"    | 8.489259    | 8.93151     | 9.324108    | 9.542246    | 9.014054    | 8.849402    | 9.09809     | 9.35303     |
| "Bcl10"    | 7.018326    | 6.892365    | 6.213360967 | 6.241430767 | 6.9336905   | 7.2087809   | 6.498223067 | 6.220798467 |
| "Bcl11a"   | 2.5499702   | 2.65732575  | 2.61985385  | 2.7432468   | 2.6194921   | 3.0234667   | 2.60865225  | 2.6986774   |
| "Bcl11b"   | 2.2364862   | 2.2874544   | 2.2744515   | 2.3260598   | 2.2518473   | 2.9982653   | 2.2505763   | 2.3329813   |
| "Bcl2"     | 2.4095378   | 2.5261576   | 2.488267    | 2.532801    | 2.4711783   | 2.4565277   | 2.436113    | 2.5208492   |
| "Bcl2a1a"  | 3.313688067 | 2.7942432   | 2.761823533 | 2.8583338   | 2.718353667 | 2.849532967 | 2.7536356   | 2.8383562   |
| "Bcl2i1"   | 4.554443    | 4.9956728   | 4.19508065  | 3.6255707   | 4.46438185  | 4.6308505   | 4.0653388   | 4.21332165  |
| "Bcl2i10"  | 2.3316474   | 2.3942223   | 2.3682308   | 2.4715166   | 2.3654766   | 2.3282266   | 2.3619866   | 2.4590957   |
| "Bcl2i11"  | 5.08441672  | 4.33377492  | 3.77034608  | 3.78024316  | 4.40843304  | 4.428412    | 3.97559144  | 4.06902034  |
| "Bcl2i13"  | 7.7117004   | 8.174555    | 7.813898    | 7.9261866   | 7.9373007   | 7.802005    | 8.280774    | 8.065984    |
| "Bcl2i14"  | 2.767968    | 3.3280668   | 2.969309    | 3.0378025   | 2.9703681   | 2.9464772   | 2.9688826   | 3.023176    |
| "Bcl2i2"   | 4.0713308   | 4.442101667 | 4.487228767 | 4.664010933 | 4.379958933 | 4.247868867 | 4.379775267 | 4.559942833 |
| "Bcl3"     | 5.138161    | 3.1264331   | 3.269795    | 3.3216264   | 3.0941398   | 3.39946     | 3.7540758   | 3.3234832   |
| "Bcl6"     | 5.79165605  | 5.76760935  | 7.88155325  | 7.28888565  | 6.22325275  | 5.5133692   | 7.1824565   | 7.47546     |
| "Bcl6b"    | 3.6304162   | 3.6883223   | 3.6816487   | 3.9839592   | 3.6582181   | 3.6404922   | 4.3953457   | 3.929052    |
| "Bcl7b"    | 6.9380074   | 7.7354527   | 6.3499346   | 6.866503    | 7.134082    | 7.344333    | 7.2488065   | 6.9707327   |
| "Bcl7c"    | 7.1860104   | 6.6500936   | 7.5246005   | 7.1901197   | 6.713627    | 6.447192    | 7.9099865   | 7.086667    |
| "Bcl9"     | 2.6783261   | 2.7444665   | 2.6646965   | 2.7332482   | 2.6862025   | 2.672178    | 2.696437    | 2.7231047   |
| "Bcl9i"    | 3.5371537   | 3.8563485   | 4.1559362   | 4.181096    | 4.3821588   | 4.1257277   | 4.4445205   | 4.194442    |
| "Bclaf1"   | 8.613107    | 9.4706815   | 8.2459238   | 8.41334225  | 8.927572    | 9.51717     | 8.07396885  | 8.579871    |
| "Bcmo1"    | 2.3676739   | 2.4128513   | 2.396006    | 2.4672377   | 2.3827271   | 2.3442545   | 2.377085    | 2.4557135   |
| "Bcr"      | 4.6830153   | 4.92632     | 4.6403737   | 4.167976    | 4.891116    | 5.313851    | 4.708011    | 4.522655    |
| "Bcs1l"    | 7.10807     | 6.9644194   | 8.156683    | 8.158077    | 7.4180946   | 6.9630036   | 8.2444725   | 7.8827972   |
| "Bdh1"     | 7.6354782   | 5.03124785  | 4.05833175  | 7.003066    | 4.8289454   | 5.49887805  | 5.29480615  | 7.518183    |
| "Bdnf"     | 2.660244    | 2.712322    | 2.7659876   | 2.7666197   | 2.7757633   | 2.646865    | 2.6819208   | 2.9182377   |
| "Becn1"    | 6.4010825   | 6.80449205  | 6.780960075 | 7.0683922   | 6.610592275 | 6.592755375 | 6.6838068   | 7.1346557   |
| "Bet1"     | 7.32349185  | 7.4679022   | 7.71798785  | 7.7297665   | 7.4009354   | 7.1052918   | 7.63785175  | 7.6575587   |
| "Bet1i"    | 6.64342745  | 7.46929725  | 5.99247175  | 5.72810805  | 6.685983825 | 7.58413965  | 5.958436075 | 5.9040872   |
| "Beta-s"   | 13.414754   | 13.362667   | 12.499518   | 12.718692   | 13.599662   | 13.810575   | 12.356092   | 13.6508665  |
| "Bex1"     | 11.449809   | 9.472032    | 11.0597515  | 10.523317   | 9.681765    | 8.745737    | 11.5190115  | 10.59078    |
| "Bex2"     | 2.469974    | 2.667789    | 2.6195006   | 2.739318    | 2.6182055   | 2.571774    | 2.5975246   | 2.6715221   |
| "Bex4"     | 2.4933095   | 2.5933266   | 2.55214     | 2.6697228   | 2.5481088   | 2.5230799   | 2.5384572   | 2.653089    |
| "Bex6"     | 2.6668782   | 2.7978468   | 2.7162828   | 2.8879938   | 2.7235985   | 2.6584      | 2.7076726   | 2.849254    |
| "Bfar"     | 8.536407    | 9.282373    | 8.703175333 | 8.803168    | 9.459928667 | 9.506203333 | 8.5645865   | 8.781208667 |
| "Bgla"     | 2.6869      | 2.8527813   | 3.052781    | 2.9072216   | 2.7580185   | 6.528796    | 2.8248293   | 2.8794165   |
| "Bgn"      | 9.534002667 | 8.362474    | 10.105285   | 8.909004    | 9.516793667 | 9.175718    | 9.541524667 | 9.323141667 |
| "Bhlha15"  | 2.33684495  | 2.432219    | 2.381247    | 2.4736675   | 2.3773214   | 2.3425552   | 2.3727572   | 2.45869855  |
| "Bhlhe22"  | 2.722862    | 2.9049673   | 2.79612     | 2.97398     | 2.803858    | 2.8196514   | 2.7973785   | 2.9143915   |
| "Bhlhe40"  | 9.685676    | 7.453391    | 10.497613   | 10.918364   | 9.172012    | 7.3981686   | 10.441009   | 10.787088   |
| "Bhmt"     | 11.465633   | 3.1372366   | 8.240874    | 2.9865336   | 7.416707    | 2.8186142   | 2.8674507   | 6.976142    |
| "Bhmt2"    | 7.1519792   | 3.0528336   | 2.9437844   | 3.0342599   | 2.95660505  | 2.79565545  | 2.8925415   | 2.9944059   |
| "Bicc1"    | 6.858568    | 6.9133935   | 7.564       | 7.002361    | 7.3529835   | 7.2135463   | 6.9169283   | 6.997433    |
| "Bicd1"    | 2.617693033 | 2.7363677   | 2.6564127   | 2.774354667 | 2.6632633   | 2.598476867 | 2.661323133 | 2.7397103   |
| "Bicd2"    | 5.344909933 | 5.119457467 | 5.623317833 | 5.764238767 | 5.422104233 | 5.1336912   | 5.7879146   | 5.777665467 |
| "Bid"      | 3.11122605  | 2.58730175  | 2.5724938   | 2.6390102   | 2.63691545  | 3.1971981   | 3.02897145  | 2.63381135  |
| "Bik"      | 3.0642742   | 3.1029855   | 3.0691217   | 3.20231715  | 3.04359005  | 3.0577585   | 3.11011685  | 3.15361725  |
| "Bin1"     | 10.440933   | 10.812139   | 11.186058   | 11.200364   | 10.460303   | 10.276467   | 11.255593   | 11.122256   |
| "Bin3"     | 7.3345604   | 6.732974    | 6.4692707   | 6.320891    | 6.9960837   | 6.8892145   | 6.634312    | 6.255377    |
| "Birc2"    | 7.9408107   | 8.230461    | 7.923028    | 8.173854    | 8.137046    | 8.540537    | 8.031484    | 8.120631    |
| "Birc3"    | 4.94784785  | 4.29606005  | 4.548856    | 4.45408535  | 4.5762666   | 5.3562224   | 4.90085985  | 4.4158987   |
| "Birc5"    | 2.5572007   | 2.5977383   | 2.5747693   | 2.6412349   | 2.5634685   | 3.1850183   | 2.5874715   | 2.641921    |
| "Birc6"    | 5.216532733 | 5.234618433 | 4.964422333 | 5.285575533 | 5.1836601   | 5.710148967 | 4.9227179   | 5.306954667 |
| "Blcap"    | 7.1350884   | 7.076239    | 8.373891    | 7.9210353   | 8.1962385   | 7.403781    | 8.316394    | 8.024676    |
| "Blk"      | 1.8410777   | 1.8833014   | 1.8629448   | 1.9286565   | 1.8715112   | 3.0969048   | 1.8530846   | 1.9311689   |
| "Blm"      | 2.3345077   | 3.4548693   | 2.3449233   | 2.4021263   | 2.3466847   | 2.3245046   | 2.344478    | 2.4048805   |

|           |             |             |             |             |             |             |             |             |
|-----------|-------------|-------------|-------------|-------------|-------------|-------------|-------------|-------------|
| "Blmh"    | 7.1466307   | 7.0730695   | 7.2293497   | 7.087494    | 7.0152462   | 7.2867555   | 7.21398185  | 7.0991765   |
| "Blmk"    | 3.4748585   | 2.5951777   | 3.5006483   | 3.0744174   | 3.2739394   | 5.624866    | 5.407919    | 3.6978962   |
| "Bloc1s1" | 10.663089   | 10.445565   | 10.776226   | 10.685074   | 10.631761   | 10.185524   | 11.008963   | 10.496341   |
| "Bloc1s3" | 5.437002    | 5.443909    | 5.410329    | 5.43632     | 5.440837    | 5.384368    | 5.639976    | 5.502584    |
| "Blvra"   | 6.8803797   | 6.7033415   | 7.2875104   | 7.3742895   | 7.033213    | 6.910979    | 7.07314     | 7.1036167   |
| "Blvrb"   | 7.7265854   | 4.1802816   | 6.3367863   | 4.904106    | 6.2810955   | 6.378811    | 6.7305374   | 5.473413    |
| "Blzff1"  | 6.094358    | 6.627521    | 6.0688472   | 6.29699275  | 6.1078768   | 6.3452561   | 5.9289428   | 6.0925445   |
| "Bmi1"    | 8.68219225  | 9.1109055   | 9.7435985   | 10.113084   | 9.1778825   | 8.726114    | 9.755117    | 9.8957095   |
| "Bmp1"    | 3.829264233 | 3.752252467 | 4.223550333 | 3.9781225   | 3.9710875   | 3.7649243   | 3.755423767 | 3.907637    |
| "Bmp10"   | 2.2398171   | 2.3056722   | 2.2835093   | 2.3713481   | 2.2823994   | 2.225071    | 2.4989643   | 2.3577886   |
| "Bmp2"    | 5.0995216   | 4.134258    | 4.0592823   | 4.3085914   | 4.063968    | 4.1059804   | 4.0599856   | 4.267119    |
| "Bmp2k"   | 4.9180805   | 5.2076993   | 4.32598065  | 4.4365525   | 4.3553128   | 4.60676535  | 4.408624    | 4.15624425  |
| "Bmp4"    | 7.169717    | 7.2627625   | 6.450911    | 6.3926806   | 7.0634375   | 6.861693    | 6.754735    | 6.9339957   |
| "Bmp5"    | 2.9063268   | 2.9588878   | 3.1902475   | 3.0967103   | 2.86325375  | 2.8339894   | 2.93803955  | 3.5742761   |
| "Bmp6"    | 4.813754    | 4.410103    | 4.5507975   | 4.743297    | 5.1729503   | 5.1666946   | 4.8139744   | 5.02504     |
| "Bmp8a"   | 2.7708685   | 2.9783337   | 2.8471332   | 2.964014    | 2.8803735   | 2.9009125   | 2.8461144   | 2.8796906   |
| "Bmp8b"   | 2.3203166   | 2.4171958   | 2.3558698   | 2.4814649   | 2.3594992   | 2.3163538   | 2.3531382   | 2.4513152   |
| "Bmpr1a"  | 5.17605746  | 5.47518448  | 5.97932366  | 6.26606724  | 5.95367788  | 5.04775186  | 5.91614808  | 6.10105776  |
| "Bmpr1b"  | 2.7392952   | 2.8857358   | 2.7932932   | 2.937647    | 2.822885    | 2.7842624   | 2.8197904   | 2.9379334   |
| "Bmpr2"   | 4.819518    | 5.4351597   | 5.0218763   | 4.7433844   | 4.713799    | 4.855386    | 5.3883743   | 5.1617928   |
| "Bms1"    | 7.8864584   | 8.353172    | 7.8550215   | 8.235462    | 7.9283915   | 7.9964643   | 8.061325    | 8.177407    |
| "Bmx"     | 2.7920291   | 2.8604627   | 2.8426774   | 2.9234922   | 2.841152    | 2.7473016   | 2.799688    | 2.9008403   |
| "Bmyc"    | 3.7455552   | 3.7618973   | 3.7625766   | 3.7955966   | 3.754483    | 3.7385883   | 3.8506103   | 4.14072     |
| "Bnc1"    | 2.8522398   | 2.9003036   | 2.8631637   | 3.000312    | 2.869918    | 2.8315196   | 2.8694232   | 2.948922    |
| "Bnip1"   | 7.020637    | 7.551134    | 7.0634236   | 7.2490063   | 6.915696    | 6.895594    | 7.300926    | 7.223878    |
| "Bnip2"   | 7.49993595  | 7.650757825 | 7.9769234   | 7.97287185  | 7.59108755  | 7.661433475 | 7.7923195   | 8.00645285  |
| "Bnip3"   | 13.281464   | 13.965618   | 11.899755   | 12.077023   | 13.493278   | 14.067094   | 12.225716   | 12.264067   |
| "Bnip3l"  | 10.06321233 | 11.064889   | 9.365077    | 9.216633    | 9.9502055   | 10.554366   | 9.281336233 | 9.536377    |
| "Boc"     | 3.276575533 | 3.5760231   | 3.554644333 | 3.527533967 | 3.4519455   | 3.5370062   | 3.32651     | 3.611335833 |
| "Bod1l"   | 6.9908895   | 7.979496    | 6.8817415   | 7.2451468   | 7.369341    | 7.6801767   | 7.056365    | 7.4808593   |
| "Bok"     | 4.3142242   | 2.9346101   | 2.9321504   | 2.9417818   | 3.0488143   | 3.40427     | 2.6847792   | 2.942111    |
| "Bola1"   | 5.1070952   | 5.34053395  | 5.11262925  | 5.17961585  | 5.12948405  | 4.8743261   | 5.1865857   | 5.14925445  |
| "Bola2"   | 8.229179375 | 8.069691675 | 7.724149425 | 7.693109675 | 7.785882525 | 7.6455      | 8.4109799   | 7.623994825 |
| "Bop1"    | 5.779286    | 6.0964746   | 5.6395826   | 5.73812     | 5.466581    | 5.2925315   | 6.139135    | 5.2371416   |
| "Bpgm"    | 8.032085667 | 9.061139333 | 9.909709333 | 10.12751333 | 8.6778512   | 8.209287233 | 8.992106833 | 9.90087333  |
| "Bphi"    | 5.495985    | 5.10947945  | 5.3467695   | 5.3213847   | 5.2402565   | 5.1194808   | 5.39358395  | 5.33598985  |
| "Bpifa1"  | 2.2866654   | 2.3586679   | 2.3220224   | 2.4241784   | 2.3296447   | 2.2909293   | 2.3273215   | 2.4132695   |
| "Bpifb1"  | 2.9141519   | 2.9951282   | 2.9070397   | 3.0256201   | 2.95642555  | 2.8198909   | 2.8395408   | 3.01023065  |
| "Bpifb5"  | 2.4716606   | 2.5518084   | 2.438448    | 2.6125915   | 2.5100431   | 2.4780815   | 2.4955611   | 2.5712957   |
| "Bpnt1"   | 6.2684595   | 5.15068135  | 6.82117605  | 6.85942785  | 6.36583135  | 5.62495135  | 6.93982795  | 6.79785205  |
| "Bptf"    | 7.0776457   | 7.868068875 | 7.2043048   | 6.884999525 | 7.270961    | 8.072626925 | 7.1524626   | 7.105658075 |
| "Brap"    | 5.83575465  | 5.424537    | 4.96559605  | 5.2321537   | 5.2881545   | 5.3646305   | 5.2612594   | 5.116449    |
| "Brca1"   | 2.4932781   | 2.526775    | 2.4800856   | 2.59988715  | 2.4780928   | 2.4320705   | 2.46948245  | 2.57658515  |
| "Brca2"   | 2.6860466   | 3.17891     | 2.7142053   | 2.7565305   | 2.7341478   | 2.6927607   | 3.1364305   | 2.8011243   |
| "Brcc3"   | 5.8748718   | 6.312631967 | 6.0727209   | 6.235814567 | 6.209275667 | 5.7533496   | 6.043816433 | 6.129719033 |
| "Brd1"    | 6.447144    | 7.2894545   | 6.2301536   | 5.7845078   | 7.06123     | 7.1153245   | 6.306864    | 6.471305    |
| "Brd2"    | 8.905794    | 9.171685    | 8.5940147   | 8.6706185   | 8.5279348   | 8.962543    | 8.67445275  | 8.653995    |
| "Brd3"    | 4.550353167 | 4.8006603   | 4.7489701   | 4.776135    | 4.7136848   | 4.684853967 | 4.864233567 | 4.829825667 |
| "Brd4"    | 6.642196867 | 6.832201333 | 6.315046867 | 6.134150333 | 6.4518251   | 6.933233367 | 6.4220003   | 6.255094867 |
| "Brd7"    | 9.501665    | 9.784909    | 9.829446    | 9.855434    | 9.384647    | 9.473463    | 9.781936    | 9.917401    |
| "Brd8"    | 5.6898343   | 6.475101    | 5.891418967 | 5.5653262   | 6.49509     | 6.56685633  | 5.9443182   | 5.979645467 |
| "Brdt1"   | 3.5924065   | 3.4982977   | 3.4646068   | 3.4827373   | 3.4588428   | 3.407826    | 3.4667757   | 3.6066773   |
| "Bre"     | 7.24693565  | 7.1663499   | 7.22547785  | 7.0543945   | 7.0321922   | 6.9100575   | 7.165809    | 7.04243995  |
| "Bri3"    | 8.79129     | 9.25288     | 8.809939    | 8.866313    | 9.233339    | 8.990821    | 9.0323715   | 8.811912    |
| "Brix1"   | 6.0616865   | 6.5523011   | 5.9767269   | 5.9749589   | 6.0883803   | 6.32841885  | 5.9674849   | 6.0889062   |
| "Brms1"   | 3.90731835  | 4.0340755   | 3.7021921   | 3.7124568   | 3.6553195   | 3.6614352   | 3.52726725  | 3.7121971   |
| "Brox"    | 5.8119002   | 6.08016185  | 5.77482885  | 5.779348    | 6.03019215  | 6.09116035  | 5.78200165  | 5.77584535  |
| "Brp44"   | 12.602367   | 12.58518    | 13.058215   | 13.485397   | 12.9474125  | 12.756474   | 12.820823   | 13.292268   |
| "Brp44l"  | 12.909437   | 12.753566   | 13.02164    | 13.327688   | 12.870907   | 12.623408   | 13.063441   | 13.192238   |
| "Brpf1"   | 7.3429112   | 7.9703517   | 6.815158    | 7.0341654   | 7.4473467   | 8.091034    | 6.994973    | 7.310969    |
| "Brwd1"   | 5.46959505  | 5.475722825 | 5.4193665   | 5.5209023   | 5.539307275 | 5.64344905  | 5.36256575  | 5.446067125 |
| "Bsc12"   | 5.93159885  | 5.94608675  | 6.600659    | 6.06177365  | 7.2251535   | 7.7126947   | 8.395198    | 6.34326615  |
| "Bsdc1"   | 8.121927    | 8.94173335  | 7.62252235  | 7.755407    | 8.4017645   | 9.084049    | 7.7553335   | 7.7278315   |
| "Bsg"     | 10.343327   | 10.64575    | 10.833181   | 10.684251   | 10.651787   | 10.085783   | 10.800103   | 10.400235   |
| "Bst1"    | 2.501565    | 2.5992837   | 2.5343914   | 2.6822183   | 2.5490913   | 2.6223302   | 2.5437617   | 2.6483998   |
| "Bst2"    | 7.7578692   | 4.043297    | 6.3580236   | 6.0555015   | 5.268014    | 5.913386    | 7.3555975   | 6.2443256   |
| "Btbd1"   | 7.49231865  | 7.72047525  | 7.8293896   | 7.86096985  | 7.681454    | 7.4633657   | 7.67690635  | 7.84956115  |
| "Btbd10"  | 5.540766    | 5.6261396   | 6.6006527   | 6.171307    | 5.9589977   | 6.2958975   | 6.353423    | 6.211433    |
| "Btbd17"  | 3.3873284   | 3.5376182   | 3.4287865   | 3.5486457   | 3.430445    | 3.2956905   | 3.4277608   | 3.517604    |
| "Btbd2"   | 5.5792303   | 6.1886806   | 5.6378794   | 5.72783     | 5.772332    | 5.4222546   | 5.650796    | 5.23094     |
| "Btbd3"   | 2.2092981   | 2.2467313   | 2.281857    | 2.4306638   | 2.2616866   | 2.2426789   | 2.2591436   | 3.0900006   |
| "Btc"     | 2.4372965   | 2.5379597   | 2.48450575  | 2.5835372   | 2.48836015  | 2.57738375  | 2.477432    | 2.56508235  |
| "Btd"     | 4.8310475   | 2.7921062   | 3.1526308   | 2.327383    | 3.3621094   | 3.5196617   | 3.111095    | 3.2443185   |
| "Btf3"    | 8.9093722   | 9.252642733 | 8.886447067 | 9.047169567 | 8.9560668   | 8.941384567 | 9.098543067 | 9.057684433 |
| "Btf3l4"  | 6.518036933 | 7.0082798   | 6.592573733 | 6.591584833 | 6.555447233 | 6.643277933 | 6.574488233 | 6.675149167 |
| "Btg1"    | 10.533457   | 10.328563   | 9.525492    | 9.2180895   | 10.388686   | 11.2321515  | 9.668553    | 9.759794    |
| "Btg2"    | 11.2809465  | 11.4134075  | 7.58750225  | 7.4657795   | 9.8319475   | 10.6092975  | 8.433387    | 7.280623    |
| "Btg3"    | 8.489945    | 7.540021    | 7.1945944   | 6.8853      | 7.8092804   | 8.74796     | 7.1915026   | 6.9757795   |
| "Btg4"    | 2.34578     | 2.4218478   | 2.38739     | 2.5141153   | 2.4244602   | 2.3523479   | 2.4026842   | 2.470677    |
| "Btk"     | 2.3888092   | 2.4119456   | 2.4065983   | 2.4523094   | 2.3985317   | 3.3358533   | 2.4040475   | 2.45186626  |
| "Btn1a1"  | 2.9395072   | 3.2221525   | 3.0601377   | 3.2742445   | 3.0790153   | 2.967308    | 3.0530047   | 3.1986244   |

|                 |             |             |             |             |             |             |             |             |
|-----------------|-------------|-------------|-------------|-------------|-------------|-------------|-------------|-------------|
| "Btrc"          | 2.500909    | 2.5676172   | 2.5562603   | 2.863031    | 2.7672842   | 2.5612986   | 2.5463457   | 2.6364932   |
| "Bub1"          | 2.5411229   | 2.6526047   | 2.58616685  | 2.70974915  | 2.5933612   | 2.5373274   | 2.5910764   | 2.6927245   |
| "Bub3"          | 5.076712775 | 5.521556925 | 5.243725375 | 5.352131725 | 5.30239515  | 5.384541075 | 5.256603575 | 5.367903875 |
| "Bud13"         | 4.280624    | 5.7111473   | 4.472767    | 4.7266483   | 5.0810766   | 5.033831    | 4.376047    | 4.5392084   |
| "Bud31"         | 7.2079305   | 7.242647333 | 7.223071567 | 7.199113667 | 7.093884267 | 7.379112333 | 7.348199433 | 7.2608438   |
| "Bves"          | 8.197134    | 8.00113     | 8.345494    | 8.486778    | 7.958429    | 7.5779166   | 8.670712    | 8.24593     |
| "Bysl"          | 6.70568785  | 7.48108245  | 6.6544252   | 6.6956716   | 6.641543    | 6.7786345   | 6.9047755   | 6.76326035  |
| "Bzw1"          | 7.21547468  | 7.1975059   | 7.01247436  | 6.8876192   | 7.2897595   | 7.49190464  | 6.99725306  | 6.90826112  |
| "Bzw2"          | 7.53729235  | 7.851844    | 8.44545     | 7.89092865  | 7.64198225  | 6.90047435  | 7.89983285  | 7.8729935   |
| "C030006K11Rik" | 6.193177    | 6.1632004   | 6.328125    | 6.5685573   | 6.8151116   | 6.102409    | 6.658643    | 6.375989    |
| "C030018P15Rik" | 2.4128566   | 2.5714943   | 2.837566    | 2.614961    | 2.5398407   | 2.5242841   | 2.5609767   | 2.736014    |
| "C130026I21Rik" | 2.87749045  | 2.9500693   | 2.9315786   | 2.9638303   | 2.95361365  | 2.9406991   | 2.91869465  | 2.7066307   |
| "C130036L24Rik" | 2.3286889   | 2.3971374   | 2.3516707   | 2.458998    | 2.335856    | 2.3146157   | 2.3511438   | 2.4059048   |
| "C1d"           | 5.589837    | 5.780437    | 5.8522263   | 6.3884088   | 5.6604826   | 5.560684433 | 5.810979267 | 6.248457033 |
| "C1galt1"       | 3.4693371   | 3.6704687   | 3.51195705  | 3.5361354   | 3.42412185  | 3.65921     | 3.42627715  | 3.3619452   |
| "C1galt1c1"     | 8.5100975   | 8.096645    | 8.3422785   | 8.323796    | 7.9241834   | 8.360029    | 8.243995    | 8.407013    |
| "C1qa"          | 9.555697    | 5.2005033   | 8.295335    | 7.271493    | 8.679689    | 9.126211    | 9.127359    | 7.525729    |
| "C1qb"          | 9.446101333 | 5.594951333 | 8.004413667 | 7.116249333 | 8.454556333 | 8.674578333 | 9.086731333 | 7.728960333 |
| "C1qbp"         | 10.78443225 | 10.99890375 | 10.872636   | 10.863722   | 11.0246405  | 10.901888   | 10.9405285  | 10.833773   |
| "C1qc"          | 8.430551    | 3.3618007   | 6.9146094   | 5.4132643   | 7.0685453   | 8.015673    | 7.6883364   | 6.2546816   |
| "C1ql1"         | 2.3952615   | 2.425886    | 2.4108126   | 2.540506    | 2.4158933   | 2.3924427   | 2.4100366   | 2.507673    |
| "C1ql3"         | 3.00014825  | 2.92259775  | 3.047865    | 3.06821125  | 2.9939004   | 2.86254635  | 3.25402395  | 3.08640085  |
| "C1qtnf1"       | 4.48589505  | 4.5201902   | 5.32394265  | 4.6488564   | 5.07914255  | 4.853496    | 4.71580555  | 4.76328715  |
| "C1qtnf3"       | 3.4462976   | 3.3703754   | 4.212096    | 3.4388883   | 3.57858     | 3.1336458   | 4.1066427   | 3.4123273   |
| "C1qtnf4"       | 6.714427    | 8.201809    | 7.290325    | 7.1378345   | 6.159623    | 5.9740596   | 7.3268332   | 7.1182623   |
| "C1qtnf5"       | 3.9197712   | 4.164027    | 4.9824843   | 4.3555083   | 3.989629    | 3.8480694   | 4.201048    | 4.3322678   |
| "C1qtnf6"       | 2.329238    | 2.375042    | 2.853584    | 2.4469733   | 2.3621078   | 2.1639202   | 2.3626714   | 2.4407444   |
| "C1ra"          | 7.89362165  | 6.1456621   | 6.91990135  | 6.6179095   | 7.0238915   | 7.3964584   | 7.05010425  | 6.7940638   |
| "C1s"           | 9.162471    | 7.397439    | 8.620515    | 8.121526    | 9.03138     | 8.931417    | 8.674239    | 8.485091    |
| "C2"            | 8.9383918   | 5.32102865  | 5.94190435  | 4.6319357   | 6.08714985  | 6.5046802   | 6.12768005  | 5.08000015  |
| "C230052I12Rik" | 3.4560301   | 4.068935    | 3.704729    | 4.4068003   | 3.7357988   | 3.5862682   | 3.725713    | 3.8666685   |
| "C230081A13Rik" | 2.3489118   | 2.44607     | 2.4012454   | 2.490713    | 2.4041038   | 2.3889372   | 2.4080992   | 2.469809    |
| "C230091D08Rik" | 6.66544865  | 7.53540325  | 7.6337365   | 7.63855515  | 7.42305485  | 7.281148    | 7.38493     | 7.865068    |
| "C2cd2"         | 8.15562     | 7.7449155   | 8.5816765   | 8.572977    | 7.962371    | 8.509051    | 8.506915    | 8.70411     |
| "C2cd21"        | 4.255748    | 4.3148613   | 3.944796    | 4.674013    | 4.2859454   | 3.8886325   | 4.284003    | 4.5171876   |
| "C2cd3"         | 5.6236715   | 6.601446    | 5.688535    | 5.9655313   | 5.961537    | 6.597161    | 5.2069273   | 5.7596707   |
| "C3"            | 14.575293   | 9.245957    | 11.177861   | 9.315984    | 11.5496645  | 12.033799   | 12.282913   | 10.235945   |
| "C330006A16Rik" | 6.7102203   | 6.4592524   | 6.93759     | 6.7904143   | 7.0633197   | 6.524522    | 6.736013    | 6.770733    |
| "C330007P06Rik" | 5.4538757   | 5.8971913   | 5.5629994   | 5.30588945  | 6.0301726   | 6.8423665   | 5.6178313   | 5.53933015  |
| "C330027C09Rik" | 2.5753801   | 2.7595476   | 2.666532    | 2.78882945  | 2.6482836   | 2.6172496   | 2.64434135  | 2.74954665  |
| "C4b"           | 10.295632   | 6.2909336   | 8.371786    | 6.263051    | 8.236177    | 9.287376    | 8.745085    | 7.4390564   |
| "C4bp-ps1"      | 2.8524969   | 2.8618462   | 2.8188422   | 2.9526865   | 2.8100524   | 2.7659595   | 2.793507    | 2.8923178   |
| "C4bp"          | 9.902678    | 2.6735246   | 2.8510761   | 2.7103443   | 2.6735246   | 2.594483    | 2.609943    | 2.7089684   |
| "C530030P08Rik" | 2.4855435   | 2.596177    | 2.5083802   | 2.6444402   | 2.508612    | 2.455749    | 2.504545    | 2.5826583   |
| "C6"            | 4.342358    | 2.191149    | 2.2076476   | 2.2370026   | 2.1748486   | 2.195752    | 2.162418    | 2.2348871   |
| "C630004H02Rik" | 2.2523603   | 2.5080597   | 2.5059364   | 2.5529456   | 2.4973724   | 2.483346    | 2.4912713   | 2.5537844   |
| "C76332"        | 2.6774752   | 2.875962    | 2.7464342   | 2.9335744   | 2.7505122   | 2.6840465   | 2.7458165   | 2.8836286   |
| "C76472"        | 2.6258984   | 2.8092628   | 2.7738795   | 2.879989    | 2.7781749   | 2.6862993   | 2.7728734   | 2.883091    |
| "C76533"        | 2.6806703   | 2.861477    | 2.709448    | 2.8256288   | 2.712777    | 2.6771352   | 2.7054293   | 2.7949169   |
| "C76554"        | 2.8540347   | 3.2848551   | 2.9724011   | 3.1646197   | 3.0379624   | 2.9146986   | 2.9749484   | 3.1333494   |
| "C76614"        | 2.379783    | 2.5881658   | 2.5779161   | 2.4712286   | 2.4104958   | 2.3599904   | 2.4183168   | 2.5232556   |
| "C76628"        | 2.45867755  | 2.5476692   | 2.4887493   | 2.5718826   | 2.48992255  | 2.4584344   | 2.4865577   | 2.57631235  |
| "C77027"        | 5.5789576   | 5.4741464   | 4.4320116   | 4.5925913   | 4.870779    | 4.5161376   | 4.633089    | 4.734586    |
| "C77068"        | 2.492315    | 2.5753343   | 2.5068526   | 2.6880274   | 2.5122786   | 2.4612043   | 2.5056884   | 2.6179838   |
| "C77080"        | 3.0570903   | 3.0397723   | 3.0493388   | 3.081173    | 3.0515873   | 3.0287597   | 3.049541    | 3.0899904   |
| "C77137"        | 2.6149044   | 2.776724    | 2.7421942   | 2.8830686   | 2.7495022   | 2.688179    | 2.7427464   | 2.8201728   |
| "C77144"        | 2.882917    | 3.1200383   | 2.9946086   | 3.1753683   | 3.0075183   | 2.9549427   | 2.9915636   | 3.085603    |
| "C77405"        | 3.6434298   | 3.9787676   | 3.663445    | 3.7567215   | 3.709296    | 3.8646362   | 3.6388721   | 3.6103995   |
| "C77609"        | 2.5210922   | 2.7034173   | 2.5528712   | 2.6316907   | 2.5704315   | 2.5353856   | 2.5666502   | 2.6556342   |
| "C77614"        | 2.6731696   | 2.9671507   | 2.8255875   | 2.9045024   | 2.8225725   | 2.810659    | 2.7924283   | 2.8874154   |
| "C77691"        | 2.6448233   | 2.7869453   | 2.7231092   | 2.8463097   | 2.678142    | 2.7077644   | 2.6356812   | 2.7893326   |
| "C77815"        | 2.9407372   | 3.2499928   | 3.0416207   | 3.1664786   | 3.0737796   | 2.9370708   | 3.0255268   | 3.118863    |
| "C77874"        | 2.279583    | 2.3874292   | 2.3137217   | 2.416882    | 2.3171902   | 2.26296     | 2.3114882   | 2.3850236   |
| "C78142"        | 2.3129244   | 2.415203    | 2.346911    | 2.471612    | 2.3539705   | 2.3098402   | 2.3436873   | 2.4576907   |
| "C78339"        | 10.39686675 | 10.73571    | 10.3086205  | 10.294161   | 10.3896675  | 10.5308715  | 10.6555135  | 10.3914715  |
| "C78344"        | 3.0327332   | 3.3207517   | 3.1770399   | 3.3770015   | 3.1818478   | 3.0667596   | 3.1734924   | 3.3004558   |
| "C78441"        | 2.1929371   | 2.4566936   | 2.2366672   | 2.3171358   | 2.2439084   | 2.1813338   | 2.2322974   | 2.3501778   |
| "C78532"        | 2.8950531   | 3.2743208   | 3.0664992   | 3.202406    | 3.0666616   | 2.9622676   | 3.046262    | 3.1879678   |
| "C78704"        | 2.915744    | 2.6655924   | 2.6299405   | 2.7156959   | 2.653812    | 2.5733335   | 2.6598213   | 2.7078085   |
| "C78859"        | 2.3136985   | 2.3618429   | 2.3269637   | 2.4133189   | 2.329478    | 2.2979605   | 2.3246899   | 2.4202847   |
| "C78878"        | 2.7666116   | 3.0439577   | 2.8216047   | 2.9393296   | 2.8450494   | 2.7118585   | 2.82227     | 2.9101439   |
| "C78891"        | 2.4772167   | 2.5834289   | 2.527083    | 2.6345322   | 2.5347242   | 2.4860606   | 2.5245242   | 2.6061974   |
| "C78948"        | 2.6604214   | 3.068871    | 2.7111602   | 2.778648    | 2.718101    | 2.6724052   | 2.698277    | 2.7816448   |
| "C79122"        | 2.7231493   | 2.85073     | 2.7701766   | 2.8842697   | 2.782502    | 2.7198837   | 2.7683442   | 2.8526955   |
| "C79130"        | 2.5720685   | 2.74052     | 2.601268    | 2.7605555   | 2.6069105   | 2.5426886   | 2.5981622   | 2.7133625   |
| "C79242"        | 3.2223592   | 4.6925097   | 3.8229535   | 3.8607872   | 5.598636    | 4.545943    | 3.823244    | 3.9564922   |
| "C79246"        | 2.893388    | 3.5417466   | 2.9583437   | 3.1223464   | 2.966606    | 2.9043975   | 2.9601889   | 3.0817      |
| "C79329"        | 2.3320334   | 2.4161432   | 2.3537717   | 2.4317892   | 2.3564491   | 2.332151    | 2.3514907   | 2.428587    |
| "C79452"        | 2.414361    | 2.494691    | 2.4359062   | 2.5824437   | 2.4398644   | 2.39517     | 2.4299557   | 2.5247946   |
| "C79468"        | 3.510341    | 3.5509775   | 3.6674771   | 3.7107875   | 3.8150413   | 3.6701276   | 3.6858244   | 3.6902633   |
| "C79562"        | 2.7776656   | 2.9198217   | 2.897915    | 2.972682    | 2.90374     | 2.8755212   | 2.864922    | 2.9944394   |

|                 |             |             |             |             |             |             |             |             |
|-----------------|-------------|-------------|-------------|-------------|-------------|-------------|-------------|-------------|
| "C80012"        | 2.7032552   | 2.6412163   | 2.5712776   | 3.2606444   | 3.3595455   | 2.514237    | 2.7648277   | 3.0029202   |
| "C80068"        | 2.4742925   | 2.5391293   | 2.715313    | 2.5744457   | 2.5200648   | 2.5044239   | 2.5082011   | 2.619826    |
| "C80171"        | 2.3865404   | 2.4421048   | 2.415535    | 2.5036302   | 2.414314    | 2.388295    | 2.4123461   | 2.489752    |
| "C80360"        | 2.5442312   | 2.6709926   | 2.5643592   | 2.6542418   | 2.5691314   | 2.5384097   | 2.5636034   | 2.638814    |
| "C80425"        | 2.7760105   | 3.0534542   | 2.858457    | 3.0342872   | 2.9064436   | 2.8766735   | 2.9103768   | 3.007421    |
| "C80678"        | 2.643983    | 2.706684    | 2.6980896   | 2.7501612   | 2.7003288   | 2.6132782   | 2.6947668   | 2.7292235   |
| "C80719"        | 2.78394     | 2.955727    | 2.8762643   | 3.0406508   | 2.8829787   | 2.7849817   | 2.8593688   | 2.9953406   |
| "C80913"        | 7.596159333 | 8.223633767 | 7.6910409   | 7.855986667 | 7.898465    | 7.4704049   | 7.636446267 | 7.616176567 |
| "C81600"        | 3.3830514   | 3.7272666   | 3.6488252   | 3.9789984   | 3.718869    | 3.6561296   | 3.6836228   | 3.751134    |
| "C86187"        | 2.386275    | 2.4727166   | 2.425803    | 2.5347798   | 2.4356012   | 2.3794725   | 2.4335685   | 2.5365884   |
| "C87436"        | 4.1950436   | 5.142411    | 4.654781    | 4.8020487   | 5.228475    | 4.869752    | 4.7900934   | 5.1064053   |
| "C8a"           | 8.951149    | 2.359877    | 2.3181603   | 2.4208322   | 2.3240514   | 2.281853    | 2.3157618   | 2.503096    |
| "C8b"           | 6.959394    | 2.2074475   | 2.1966133   | 2.2502677   | 2.194908    | 2.1850953   | 2.1817553   | 2.2517192   |
| "C8g"           | 9.589571    | 3.8350587   | 5.2774625   | 4.2818756   | 4.0452976   | 3.7346432   | 4.2223997   | 4.606068    |
| "C9"            | 8.58229     | 2.430735    | 2.6993413   | 2.470476    | 2.3864849   | 2.3644524   | 2.2822251   | 2.456675    |
| "C920021L13Rik" | 2.7885625   | 2.9229677   | 2.976557    | 2.9757848   | 2.9181197   | 2.840376    | 3.0452332   | 2.6968818   |
| "C920025E04Rik" | 6.233926    | 4.9688283   | 5.57244755  | 5.2133902   | 5.7317466   | 6.187842    | 5.96814375  | 5.3872742   |
| "Cab39"         | 10.63783    | 10.96578    | 9.9271065   | 10.6409125  | 10.644114   | 10.5200935  | 9.76766025  | 10.5077845  |
| "Cab39l"        | 5.270318567 | 4.954593067 | 5.220941133 | 5.3519094   | 4.996593867 | 5.5811344   | 5.504865567 | 5.3119539   |
| "Cables1"       | 4.9718122   | 4.5859017   | 3.0714784   | 3.7785606   | 4.45798     | 7.097991    | 4.182976    | 3.2660916   |
| "Cables2"       | 3.8736887   | 4.2867975   | 4.6584883   | 5.052775    | 3.4261758   | 4.3040648   | 4.932833    | 4.2510524   |
| "Cabp2"         | 2.3414364   | 2.5534763   | 2.4139915   | 2.4585965   | 2.4151487   | 2.3955317   | 2.4113264   | 2.464103    |
| "Cabp4"         | 2.4553466   | 2.556805    | 2.510087    | 2.6200902   | 2.5118508   | 2.4790907   | 2.510973    | 2.5932374   |
| "Cabp5"         | 2.4396987   | 2.5644212   | 2.482622    | 2.5770903   | 2.4930394   | 2.4307258   | 2.481549    | 2.5933232   |
| "Cabyr"         | 2.2907324   | 2.3910136   | 2.340212    | 2.4570264   | 2.3388364   | 2.29469405  | 2.339054    | 2.41800465  |
| "Cacfd1"        | 5.53714965  | 5.9124539   | 5.5224441   | 5.58730715  | 5.6464      | 5.7185392   | 5.4274085   | 5.6399577   |
| "Cachd1"        | 3.4039625   | 4.4471235   | 4.1797377   | 4.0863756   | 4.41167985  | 4.394067    | 4.241182    | 4.18454385  |
| "Cacna1a"       | 2.6156361   | 2.74940065  | 2.7081517   | 2.96244845  | 2.75069845  | 2.5948317   | 2.617981    | 2.82230975  |
| "Cacna1c"       | 2.2930086   | 2.3733854   | 2.3457081   | 2.4419065   | 2.3452995   | 2.3182707   | 2.3452995   | 2.4214475   |
| "Cacna1d"       | 2.6131418   | 2.907795    | 2.7171235   | 2.740469    | 2.657248    | 2.5982325   | 2.6448956   | 2.7270231   |
| "Cacna1g"       | 1.8525696   | 2.043038    | 1.9930232   | 2.430906    | 1.9900343   | 1.9084017   | 1.978729    | 2.12718     |
| "Cacna1h"       | 2.5465624   | 2.6253242   | 2.57513     | 2.7302651   | 2.581408    | 2.545912    | 2.5821352   | 2.7007012   |
| "Cacna1s"       | 11.468796   | 11.981174   | 12.566669   | 12.439948   | 11.864421   | 11.483725   | 11.808276   | 12.310515   |
| "Cacna2d1"      | 6.27889025  | 6.72124785  | 6.9104735   | 7.1024905   | 6.2114184   | 6.4957718   | 6.38466285  | 7.2145728   |
| "Cacna2d2"      | 2.745106667 | 2.915616133 | 2.827743333 | 2.941755767 | 2.825668233 | 2.8359879   | 2.822436767 | 2.8996199   |
| "Cacna2d3"      | 2.562914    | 2.844727    | 3.0116327   | 3.106581    | 2.5181603   | 2.5510728   | 2.5711322   | 2.6269212   |
| "Cacnb1"        | 6.189552    | 6.03116785  | 6.3058323   | 6.2013065   | 6.07613125  | 5.46241335  | 6.5877169   | 6.0948993   |
| "Cacnb2"        | 2.5352733   | 2.6828504   | 2.5861392   | 2.7359307   | 2.5994496   | 2.5374286   | 2.572342    | 2.7152412   |
| "Cacnb4"        | 3.02219785  | 2.97386955  | 2.82135235  | 3.00284915  | 3.2336979   | 2.9928575   | 2.8660564   | 2.95681985  |
| "Cacng1"        | 11.565064   | 11.575068   | 11.524576   | 11.325613   | 10.624777   | 10.134569   | 12.129585   | 10.877411   |
| "Cacng6"        | 5.7610703   | 6.23209915  | 7.0284185   | 7.57696135  | 6.04089785  | 5.6243895   | 6.36310165  | 6.75674615  |
| "Cacybp"        | 9.485763    | 9.3997755   | 9.949361    | 10.021551   | 9.520219    | 9.171436    | 10.095596   | 10.227836   |
| "Cad"           | 3.32663965  | 3.5910703   | 4.26056985  | 3.9856411   | 3.7183052   | 3.8789874   | 4.121742    | 4.0224596   |
| "Cadm1"         | 3.354138675 | 3.344180575 | 4.389952125 | 4.5369482   | 2.9476958   | 3.00132625  | 3.430315025 | 3.703173425 |
| "Cadm3"         | 3.400333333 | 3.544702067 | 3.5273996   | 3.607509167 | 3.5453103   | 3.475463233 | 3.498402433 | 3.590213067 |
| "Cadm4"         | 3.3974442   | 3.1078706   | 3.1538143   | 3.1687577   | 3.5211532   | 2.897767    | 3.2421033   | 3.187589    |
| "Cadps"         | 2.3863325   | 2.490602    | 2.4258795   | 2.5431128   | 2.4312534   | 2.3852968   | 2.424459    | 2.5295455   |
| "Cadps2"        | 2.7015362   | 2.685359    | 2.7116878   | 2.6035063   | 2.720618    | 2.6932392   | 2.8788853   | 2.5029137   |
| "Calb1"         | 2.6631188   | 2.8169045   | 2.7206798   | 2.885847    | 2.7328796   | 2.670505    | 2.7216592   | 2.8599632   |
| "Calca"         | 2.383906    | 2.500954    | 2.4035928   | 2.4707906   | 2.402903    | 2.363361    | 2.4032185   | 2.470504    |
| "Calccoco2"     | 3.0091248   | 3.2439296   | 3.068605    | 3.2038736   | 3.0728643   | 3.0148351   | 3.0652304   | 3.18016     |
| "Calcr"         | 2.5037973   | 2.5798793   | 2.5577857   | 2.603887    | 2.5544116   | 2.5402706   | 2.537204    | 2.6370707   |
| "Calcri"        | 7.401826    | 6.9007907   | 7.89907     | 8.121779    | 7.4586854   | 7.743717    | 7.8565736   | 8.157505    |
| "Cald1"         | 8.837564233 | 8.007489667 | 8.6900632   | 8.4214192   | 8.490149    | 8.594474467 | 8.248154    | 8.442825233 |
| "Calhm2"        | 2.6685107   | 2.5034304   | 3.1793377   | 3.2330682   | 3.4365528   | 4.276512    | 3.1677368   | 3.317115    |
| "Calm1"         | 9.528151478 | 9.4737608   | 10.6948204  | 10.75282453 | 9.569597111 | 9.284138    | 10.31243511 | 10.58491998 |
| "Calm4"         | 5.524288    | 2.0773008   | 7.3367085   | 2.1161542   | 2.050881    | 2.027641    | 2.0506725   | 2.1588666   |
| "Calm13"        | 2.3114142   | 2.3947353   | 3.0999382   | 2.4566944   | 2.3465378   | 2.3079329   | 2.3610673   | 2.4168694   |
| "Calm14"        | 3.8638701   | 3.358145    | 4.750886    | 5.0475926   | 3.8756266   | 3.8217669   | 4.65222     | 3.8491704   |
| "Calr"          | 8.834466    | 8.312000667 | 9.092455667 | 8.622619667 | 8.850416333 | 8.640466567 | 9.353496    | 8.885110667 |
| "Calu"          | 9.392091    | 8.966399    | 10.069082   | 9.629879    | 9.545201    | 9.048227    | 9.613802    | 9.573464    |
| "Camk1"         | 4.6938592   | 4.52435215  | 5.6668088   | 5.4520558   | 5.08006     | 4.742861    | 5.45433685  | 5.364954    |
| "Camk1d"        | 4.7557139   | 2.79653035  | 3.4115082   | 3.3187815   | 3.166761    | 3.31313315  | 3.28868315  | 3.05859625  |
| "Camk2a"        | 2.6685653   | 2.8126798   | 2.7766252   | 2.9655929   | 2.740821    | 2.6798162   | 2.7757711   | 2.912708    |
| "Camk2b"        | 8.347275    | 8.928231    | 8.68604     | 8.599225    | 8.309692    | 7.4962087   | 8.435745    | 8.265261    |
| "Camk2d"        | 6.147446    | 6.25917135  | 6.2784303   | 6.2255402   | 6.23017505  | 6.353649    | 6.854036    | 6.1713975   |
| "Camk2g"        | 8.20775415  | 8.862925    | 9.425591    | 9.298044    | 8.41720865  | 8.0767158   | 9.0655225   | 9.3774425   |
| "Camk4"         | 2.6933687   | 2.75454675  | 2.7253623   | 2.7940151   | 2.93735465  | 2.7006617   | 2.7241647   | 2.79011645  |
| "Camkk2"        | 4.0413004   | 3.94248275  | 4.81710085  | 4.6345054   | 4.6351608   | 5.0690646   | 5.1276845   | 4.59113695  |
| "Caml"          | 6.2345257   | 6.533676    | 6.089308    | 6.386573    | 6.5520663   | 7.2477117   | 5.975134    | 6.497538    |
| "Camp"          | 2.607429    | 2.1791327   | 2.128286    | 2.2249143   | 2.1378453   | 7.9004855   | 2.161345    | 2.2261002   |
| "Camsap1"       | 5.795204633 | 5.972294733 | 5.675384433 | 5.817128033 | 5.753062467 | 5.7712626   | 5.819938933 | 5.838580333 |
| "Camta2"        | 6.730484    | 6.9977922   | 7.098696    | 7.3788333   | 6.836814    | 6.7583933   | 7.0109963   | 7.0428104   |
| "Cand1"         | 7.0894284   | 6.843131    | 6.827672    | 6.570655    | 7.0877676   | 7.1892667   | 7.0182776   | 6.9199405   |
| "Cant1"         | 4.51697145  | 4.65540745  | 4.4350743   | 4.4344802   | 4.74425845  | 4.67500185  | 4.7055495   | 4.49709845  |
| "Canx"          | 7.192023833 | 6.464102467 | 7.109112867 | 7.1723431   | 7.179873667 | 7.0439176   | 7.659716567 | 7.311919267 |
| "Cap1"          | 4.2656135   | 4.12439515  | 4.2897184   | 4.3647005   | 4.1544033   | 4.70905245  | 4.27442975  | 4.3621285   |
| "Cap2"          | 10.12162975 | 10.3410985  | 10.5803465  | 10.5584305  | 9.9935905   | 9.6827535   | 10.984255   | 10.60272725 |
| "Capg"          | 6.5933304   | 6.694318    | 7.045504    | 6.753617    | 6.9658318   | 6.8348455   | 6.8498936   | 6.618886    |
| "Capn1"         | 3.93707675  | 4.2796981   | 4.52971615  | 4.56496585  | 4.198111    | 3.97820365  | 4.20290065  | 4.51465145  |
| "Capn10"        | 4.1772847   | 3.574206    | 3.1949396   | 3.253089    | 3.481494    | 4.30348     | 3.123681    | 3.3462303   |

|             |             |             |             |             |             |             |             |             |
|-------------|-------------|-------------|-------------|-------------|-------------|-------------|-------------|-------------|
| "Capn12"    | 2.5930424   | 2.6780784   | 2.968179    | 2.7260103   | 2.9647808   | 2.6147516   | 2.6291926   | 2.7225826   |
| "Capn2"     | 9.742304    | 9.751073    | 9.749122    | 9.562689    | 9.940607    | 9.859137    | 10.391191   | 9.508549    |
| "Capn3"     | 8.469118    | 8.831586    | 9.433647    | 9.295172    | 8.64492     | 8.43923     | 8.976291    | 9.352974    |
| "Capn6"     | 3.051098    | 3.0984993   | 3.531397    | 3.0825613   | 2.7868252   | 2.5674696   | 3.0488667   | 3.067392    |
| "Capn7"     | 8.243310667 | 8.710752233 | 8.579007133 | 8.99345     | 8.473240567 | 8.5062691   | 8.665594467 | 9.100179667 |
| "Capns1"    | 9.308001    | 9.010664    | 9.230254    | 9.091155    | 9.226666    | 9.045268    | 9.533078    | 8.939224    |
| "Caprin1"   | 6.944602983 | 6.690972583 | 6.8524108   | 6.7470101   | 6.8812879   | 7.244031767 | 7.025006083 | 6.8429371   |
| "Caprin2"   | 2.9350312   | 2.9840848   | 3.2691734   | 3.179626    | 3.4618423   | 2.8285882   | 3.126495    | 3.2464528   |
| "Capza1"    | 8.37700725  | 8.163302    | 8.9787785   | 8.743095    | 8.618848    | 9.052831    | 9.228081    | 8.827019    |
| "Capza2"    | 11.119721   | 11.830909   | 12.1079955  | 12.18299625 | 11.494856   | 11.566923   | 11.582433   | 12.14148375 |
| "Capza3"    | 2.3778822   | 2.4669588   | 2.4307342   | 2.5293806   | 2.42561     | 2.3750305   | 2.4108417   | 2.514027    |
| "Capzb"     | 8.0688685   | 8.367867475 | 8.563150375 | 8.480963325 | 8.130136175 | 8.16818865  | 8.298944125 | 8.394212625 |
| "Car1"      | 2.5349455   | 2.6405149   | 2.5565062   | 2.7547336   | 2.5844638   | 2.5656476   | 2.5800374   | 2.6632843   |
| "Car10"     | 2.6684387   | 2.7519112   | 2.675669    | 2.8311853   | 2.6892805   | 2.6246314   | 2.6848898   | 2.8065367   |
| "Car11"     | 2.4503648   | 2.6184993   | 2.8173158   | 2.9685137   | 2.7761848   | 2.7671864   | 2.7187805   | 3.0790555   |
| "Car12"     | 2.0880795   | 2.1491992   | 2.444939    | 2.1927607   | 2.1235812   | 2.1310494   | 2.1175551   | 2.1959834   |
| "Car13"     | 2.64291135  | 2.74274935  | 2.7975799   | 2.80613775  | 2.69537915  | 3.0316478   | 2.90006315  | 2.78450505  |
| "Car14"     | 8.976614    | 10.98893    | 8.328393    | 8.648074    | 9.593339    | 9.505436    | 8.2335415   | 8.687887    |
| "Car2"      | 6.8035855   | 6.511658    | 6.6215653   | 6.4944253   | 6.7257466   | 6.666124    | 6.9456596   | 7.390294    |
| "Car3"      | 15.1020605  | 14.9185855  | 15.374591   | 14.880619   | 15.028129   | 15.0012305  | 15.206206   | 14.981643   |
| "Car4"      | 5.3566034   | 6.1519807   | 5.18153975  | 5.7727905   | 7.4588817   | 7.77162585  | 5.7974892   | 6.63329565  |
| "Car5b"     | 2.324872    | 2.6140912   | 2.5937378   | 2.4340024   | 5.195208    | 5.8674927   | 5.327873    | 2.6579812   |
| "Car7"      | 3.3291776   | 3.4457095   | 3.355892    | 3.4137087   | 3.3466427   | 3.1274428   | 3.345739    | 3.4207952   |
| "Car8"      | 4.87358485  | 3.885149    | 4.61215045  | 5.25984635  | 4.39021995  | 4.19302455  | 4.46305395  | 5.32522425  |
| "Car9"      | 2.3579211   | 2.6720302   | 2.8268309   | 2.5546615   | 2.7173727   | 2.5209153   | 2.337624    | 2.4342852   |
| "Card10"    | 4.4726734   | 5.3195677   | 5.35697     | 5.282241    | 5.2153378   | 6.480701    | 5.41889     | 5.5918775   |
| "Carf"      | 2.9535785   | 3.2695377   | 3.067691    | 3.2354648   | 3.0865114   | 3.036354    | 3.0647385   | 3.244927    |
| "Carhsp1"   | 5.384173    | 3.8865482   | 4.2196525   | 3.8894379   | 4.60810785  | 4.5596898   | 4.89244745  | 4.2934204   |
| "Carkd"     | 8.207155    | 8.377584    | 8.12916     | 8.023936    | 8.095179    | 8.442001    | 7.9709225   | 8.0941515   |
| "Carm1"     | 5.981346    | 6.3203006   | 5.7314425   | 6.39948     | 5.7687893   | 6.0043335   | 6.1677947   | 5.968889    |
| "Carns1"    | 5.701032    | 6.0313077   | 7.15971     | 7.5373373   | 6.0228105   | 5.216075    | 6.810041    | 6.7340026   |
| "Cars"      | 7.1285586   | 7.6730137   | 7.3624616   | 7.228954    | 7.0882      | 7.2030153   | 6.820964    | 7.250048    |
| "Casc3"     | 6.910758    | 7.60399     | 6.2029486   | 6.088009    | 7.063809    | 7.3531876   | 6.5361905   | 6.5191054   |
| "Casd1"     | 5.4539559   | 5.8087057   | 6.0079686   | 6.0415392   | 5.7026156   | 5.6631256   | 5.74861615  | 5.97306485  |
| "Cask"      | 4.231330633 | 4.255072233 | 4.3667469   | 4.3034431   | 4.291203233 | 4.624242    | 4.125983967 | 4.2744767   |
| "Caskin2"   | 6.9052253   | 7.0343127   | 7.2634883   | 6.962653    | 7.395696    | 7.270581    | 7.186693    | 7.006185    |
| "Casp1"     | 2.634359    | 2.8379092   | 2.8920803   | 2.8340373   | 3.005365    | 3.10895     | 3.1248357   | 2.8932018   |
| "Casp12"    | 6.708663    | 7.50752625  | 6.399045    | 8.334339    | 6.9752043   | 7.1838875   | 6.77489805  | 8.01184175  |
| "Casp2"     | 5.05906     | 5.0473003   | 5.263999    | 5.210257    | 5.5863614   | 6.2681355   | 5.1585274   | 5.5121756   |
| "Casp3"     | 4.7074447   | 3.4342606   | 3.9455083   | 3.9732826   | 3.9450846   | 3.9341438   | 4.163559    | 3.7676039   |
| "Casp4"     | 3.4254332   | 2.5655386   | 2.7162838   | 2.6311522   | 2.7290373   | 3.3166933   | 3.1013074   | 2.586969    |
| "Casp6"     | 5.3247757   | 4.7884417   | 4.914064    | 4.8277216   | 5.0566635   | 5.013838    | 5.0024185   | 4.970643    |
| "Casp7"     | 4.352314    | 3.334467    | 5.0903125   | 5.0675483   | 5.011485    | 4.4414124   | 5.3622727   | 5.0337334   |
| "Casp8"     | 4.983979    | 3.8253107   | 4.939358    | 4.442382    | 5.6794357   | 6.4443803   | 5.982063    | 5.067562    |
| "Casp8ap2"  | 6.4981093   | 7.3530493   | 6.6728225   | 6.7967253   | 6.8471074   | 6.887655    | 6.350796    | 6.900746    |
| "Casp9"     | 3.103235    | 3.2355957   | 3.0540273   | 3.1386334   | 3.40188205  | 3.67131835  | 3.28915685  | 3.2310769   |
| "Casq1"     | 11.292095   | 11.69356    | 12.9439     | 12.843533   | 12.031029   | 11.42889    | 11.874896   | 12.609743   |
| "Casq2"     | 9.3426      | 6.3613987   | 8.520525    | 8.7163315   | 9.078558    | 6.829692    | 9.853632    | 9.480692    |
| "Casr"      | 3.39965375  | 3.4165548   | 3.7696333   | 3.55144335  | 3.98429295  | 3.29822935  | 3.4139745   | 3.90404035  |
| "Cast"      | 8.47468225  | 9.3292725   | 8.492126    | 8.885445    | 8.8635975   | 9.031225    | 8.551162    | 8.797572    |
| "Cat"       | 11.347184   | 10.6110725  | 10.1061465  | 10.4404145  | 11.483706   | 11.885169   | 10.8051035  | 11.0189685  |
| "Catsper2"  | 4.236527    | 4.8107905   | 4.238508    | 4.9909124   | 4.570429    | 4.3066354   | 4.932308    | 4.7180614   |
| "Catsperg1" | 2.4752424   | 2.5144975   | 2.4918075   | 2.6015189   | 2.4923644   | 2.446565    | 2.4862037   | 2.5617783   |
| "Cav1"      | 10.632527   | 10.563507   | 11.403567   | 11.143175   | 11.556279   | 11.206544   | 11.770449   | 11.446322   |
| "Cav2"      | 5.91133035  | 6.0507071   | 6.4283363   | 6.3723959   | 6.69634065  | 6.4037239   | 6.8683123   | 6.5995308   |
| "Cav3"      | 8.59009     | 8.6120205   | 9.523832    | 9.733195    | 8.776268    | 8.032544    | 9.5049925   | 9.460054    |
| "Cbfa2t2"   | 7.018096    | 7.289363    | 7.4871407   | 7.326388    | 7.3835807   | 6.8421817   | 7.27583     | 7.345159    |
| "Cbfa2t3"   | 4.54541515  | 4.5352133   | 4.519683875 | 4.5948146   | 4.74782735  | 4.58109415  | 4.52219345  | 4.564547425 |
| "Cbfb"      | 10.50333    | 11.398451   | 11.628727   | 11.247948   | 11.3309765  | 11.545352   | 10.92888    | 11.418093   |
| "Cbl"       | 5.282856    | 5.049083    | 5.581764    | 4.735179    | 5.8210754   | 6.169655    | 5.758964    | 5.330351    |
| "Cblc"      | 2.386099    | 2.4146054   | 2.3880396   | 2.4836552   | 2.3924828   | 2.3713615   | 2.3831043   | 2.4597006   |
| "Cblil1"    | 7.15313485  | 7.98674515  | 7.01960335  | 7.2957775   | 7.4557016   | 8.07361425  | 7.06630565  | 7.27675125  |
| "Cbr1"      | 8.201586    | 6.7514257   | 7.2759504   | 6.9644933   | 7.276162    | 6.6764593   | 7.5475726   | 7.1848545   |
| "Cbr2"      | 6.489743    | 7.9084263   | 8.530051    | 9.136399    | 8.1123495   | 8.952138    | 7.5035653   | 8.193578    |
| "Cbr3"      | 5.9054255   | 5.420773    | 6.2630825   | 5.9956446   | 5.9106007   | 6.459951    | 5.870511    | 5.9725614   |
| "Cbr4"      | 9.313493    | 9.441914    | 9.404653    | 9.660975    | 9.621265    | 9.359618    | 9.399985    | 9.423606    |
| "Cbs"       | 6.33648525  | 2.4957317   | 2.43411305  | 2.52407795  | 2.46709065  | 2.73517925  | 2.46032185  | 2.54351985  |
| "Cbwd1"     | 6.9093704   | 7.282603    | 6.863996    | 7.437021    | 6.817915    | 6.761119    | 7.025956    | 7.2281885   |
| "Cbx1"      | 4.48331734  | 4.44130336  | 4.79057992  | 4.80554388  | 4.58714194  | 4.52823462  | 4.6407852   | 4.8753388   |
| "Cbx3"      | 7.3688709   | 7.46291875  | 7.859587925 | 7.925033825 | 7.703889025 | 7.5403805   | 7.66006615  | 7.8980498   |
| "Cbx4"      | 6.149581    | 3.8221283   | 5.11356     | 5.570322    | 5.4935403   | 6.1299033   | 6.1287265   | 5.59632     |
| "Cbx5"      | 4.416168567 | 4.473389433 | 4.772515667 | 4.8879181   | 4.6143409   | 4.3491141   | 4.9739328   | 4.700970133 |
| "Cbx6"      | 6.1926455   | 6.8571005   | 7.4388604   | 7.2641487   | 7.183848    | 7.16788     | 7.015086    | 7.259411    |
| "Cbx7"      | 2.2928      | 2.4726143   | 2.3206494   | 2.4148726   | 2.3232765   | 2.2682328   | 2.3169382   | 2.4029312   |
| "Cbx8"      | 2.55262135  | 2.6103091   | 2.58759155  | 2.6936903   | 2.5787314   | 2.502009    | 2.5784167   | 2.6573405   |
| "Cby1"      | 5.2221766   | 5.1552854   | 6.4227033   | 6.6947365   | 5.6494884   | 5.125208    | 6.0921316   | 6.403315    |
| "Cc2d1a"    | 4.841028    | 5.0919867   | 4.824107    | 5.0257816   | 4.7839413   | 4.257654    | 5.225209    | 4.5963016   |
| "Ccb12"     | 9.853893    | 6.8885627   | 6.4624047   | 6.4423842   | 7.487024    | 8.114192    | 7.3817067   | 6.8078995   |
| "Ccdc101"   | 6.5852341   | 6.988728967 | 6.981706333 | 7.359091333 | 6.479304667 | 6.624886667 | 6.8079729   | 6.912860667 |
| "Ccdc102a"  | 3.6714444   | 4.01730965  | 5.02150785  | 4.9414444   | 4.4343938   | 4.5197785   | 4.87073395  | 4.854459    |
| "Ccdc104"   | 8.215483    | 8.273611    | 7.583184    | 7.2226543   | 7.6257763   | 7.325738    | 8.263985    | 7.2794957   |

|            |             |             |             |             |             |             |             |             |
|------------|-------------|-------------|-------------|-------------|-------------|-------------|-------------|-------------|
| "Ccdc107"  | 8.056465    | 7.971769    | 7.92354     | 7.8041787   | 7.6201763   | 7.1691737   | 8.197832    | 7.611274    |
| "Ccdc109b" | 2.4020789   | 2.335577    | 3.3069663   | 2.3310068   | 2.7154517   | 2.693074    | 2.7779455   | 2.35425     |
| "Ccdc115"  | 7.1290708   | 7.7178087   | 7.204565    | 7.4938955   | 7.4870577   | 7.3797035   | 7.3781037   | 7.3879085   |
| "Ccdc117"  | 5.16848265  | 5.2972317   | 5.23180245  | 5.3317661   | 5.4305411   | 5.78500115  | 5.04819885  | 5.25243355  |
| "Ccdc12"   | 8.0045337   | 8.3227615   | 8.049888    | 8.12057485  | 7.55446575  | 7.932472    | 7.831599    | 7.8445555   |
| "Ccdc120"  | 2.5564492   | 2.6108398   | 2.625905    | 2.6567125   | 2.6175547   | 2.4767501   | 2.5221806   | 2.653383    |
| "Ccdc123"  | 4.082444    | 4.48809675  | 4.18576045  | 4.3511725   | 4.1214145   | 3.88360715  | 4.09962965  | 4.1259698   |
| "Ccdc127"  | 8.08913     | 8.238633    | 8.369937    | 8.557607    | 8.475982    | 8.01096     | 8.572809    | 8.662109    |
| "Ccdc130"  | 3.085209    | 3.535706    | 3.1327138   | 3.22643     | 3.1953502   | 3.027677    | 3.035705    | 3.2196164   |
| "Ccdc132"  | 7.2728496   | 7.81693     | 7.5918574   | 7.907841    | 7.502487    | 7.244       | 7.1658034   | 7.8142366   |
| "Ccdc134"  | 2.0479267   | 2.404726    | 2.099804    | 2.129494    | 2.0695775   | 2.0430343   | 2.0812619   | 2.1252756   |
| "Ccdc136"  | 6.306098    | 7.2423806   | 6.177796    | 6.204088    | 6.3245115   | 6.3013825   | 6.551441    | 5.8719635   |
| "Ccdc137"  | 5.0182457   | 5.0448008   | 5.009656    | 5.0708046   | 5.181311    | 5.0126915   | 5.2739506   | 5.0213947   |
| "Ccdc142"  | 10.666885   | 10.619014   | 10.719115   | 10.766747   | 10.488339   | 10.221028   | 10.87561    | 10.67506    |
| "Ccdc159"  | 2.4995718   | 2.611876    | 2.5664735   | 2.6530464   | 2.5679116   | 2.536788    | 2.567408    | 2.63564     |
| "Ccdc163"  | 3.2275574   | 3.292926    | 3.254043    | 3.2935767   | 3.269387    | 3.2197504   | 3.2437878   | 3.370337    |
| "Ccdc21"   | 6.3212857   | 7.0101957   | 6.2033057   | 6.2418303   | 6.321971    | 6.511197    | 5.6707864   | 6.376913    |
| "Ccdc22"   | 6.85463565  | 6.6296225   | 6.8251033   | 7.0441125   | 6.85807925  | 6.6994445   | 6.813249    | 6.7101695   |
| "Ccdc23"   | 7.9201574   | 7.922058    | 8.350832    | 8.084306    | 7.716121    | 7.518878    | 8.420254    | 8.056967    |
| "Ccdc25"   | 2.8575819   | 3.1887705   | 3.13745     | 3.1636972   | 3.0861936   | 2.9591346   | 3.0940704   | 3.1723652   |
| "Ccdc28a"  | 3.8803776   | 4.19341195  | 3.78165485  | 3.96206215  | 4.00448105  | 4.21259465  | 3.90096845  | 3.9088781   |
| "Ccdc34"   | 3.2692351   | 3.3401551   | 3.9841805   | 4.01442     | 3.381851    | 3.3218665   | 3.4164748   | 4.5109625   |
| "Ccdc43"   | 8.413644    | 9.1242025   | 9.1486685   | 9.5960835   | 8.3791565   | 8.2478425   | 9.286495    | 9.3292805   |
| "Ccdc45"   | 2.5325823   | 2.9116576   | 2.512426    | 2.6188402   | 2.5513783   | 2.684016    | 2.5087748   | 2.5551534   |
| "Ccdc46"   | 3.3488964   | 3.48288755  | 3.3844844   | 3.5322183   | 3.62444725  | 3.2458347   | 3.4217216   | 3.4540379   |
| "Ccdc47"   | 9.1346071   | 9.331317567 | 9.466911467 | 9.499951    | 9.406133767 | 9.656531667 | 9.357026667 | 9.38189333  |
| "Ccdc48"   | 2.392468    | 2.4910018   | 2.4475536   | 2.517673    | 2.4443402   | 2.4307475   | 2.4265325   | 2.4911065   |
| "Ccdc50"   | 6.334642175 | 6.28494465  | 6.431429875 | 6.535152825 | 6.054017575 | 5.7685634   | 6.636373    | 6.305483525 |
| "Ccdc53"   | 5.61582805  | 5.5296092   | 5.70871285  | 5.83265     | 5.59698915  | 5.4397744   | 5.8600345   | 5.7733388   |
| "Ccdc56"   | 9.5010505   | 9.5720835   | 9.8313535   | 9.799464    | 9.390073    | 9.1442865   | 9.7485795   | 9.478192    |
| "Ccdc58"   | 8.161756    | 8.02684     | 7.8581      | 8.378244    | 7.896713    | 7.595699    | 8.115696    | 8.211909    |
| "Ccdc59"   | 7.326383    | 8.447211    | 7.2789392   | 7.909002    | 7.7250333   | 7.84983     | 7.693764    | 7.613994    |
| "Ccdc6"    | 9.650471    | 9.94499     | 9.975697    | 9.911134    | 9.53684     | 9.647992    | 9.769583    | 9.659641    |
| "Ccdc64"   | 2.9632444   | 3.0574493   | 3.0531144   | 3.1206665   | 3.1899717   | 3.0348344   | 2.9948573   | 3.1006393   |
| "Ccdc65"   | 2.8145802   | 3.217911    | 2.91038     | 3.0647926   | 2.9295714   | 2.8847792   | 2.9336162   | 3.0288455   |
| "Ccdc70"   | 2.7552593   | 2.960734    | 2.8982837   | 3.0257306   | 2.9034865   | 2.7779467   | 2.8977938   | 2.9827023   |
| "Ccdc71"   | 6.1097364   | 6.850877    | 5.607337    | 5.6457696   | 6.16065     | 6.463828    | 5.762378    | 5.7933927   |
| "Ccdc72"   | 12.901932   | 13.19387    | 13.331825   | 13.295062   | 13.030857   | 12.96417    | 13.432196   | 13.16517    |
| "Ccdc77"   | 4.4222458   | 5.4051582   | 3.738041233 | 4.171368833 | 5.729317    | 6.436931967 | 3.920087167 | 4.2213953   |
| "Ccdc80"   | 6.23290835  | 5.78743875  | 7.78620785  | 6.3779975   | 8.6331774   | 8.15368585  | 7.38113125  | 6.96617725  |
| "Ccdc82"   | 2.6625192   | 2.8413036   | 2.831494    | 2.8707566   | 2.7532933   | 2.6562314   | 2.7187781   | 2.833277    |
| "Ccdc84"   | 3.40608185  | 3.27405005  | 3.40004725  | 3.50437225  | 3.53471745  | 3.3767023   | 3.8923665   | 3.53540875  |
| "Ccdc85a"  | 4.4421725   | 4.65873455  | 4.47633715  | 4.95873285  | 4.55798535  | 4.49426065  | 4.61179925  | 5.383246    |
| "Ccdc86"   | 7.79227765  | 8.42667     | 7.11625955  | 7.6903952   | 7.2533435   | 7.79676925  | 7.29101375  | 7.36102555  |
| "Ccdc88a"  | 4.281989    | 3.6189263   | 4.348758    | 3.9109657   | 3.8790073   | 5.2678585   | 3.9805477   | 4.408588    |
| "Ccdc88c"  | 4.346281    | 5.130308    | 6.371956    | 7.0524955   | 4.5890007   | 5.3555307   | 6.575218    | 6.9116592   |
| "Ccdc90b"  | 8.55158     | 8.723997    | 9.42446     | 9.525218    | 8.780215    | 8.667627    | 9.349521    | 9.49675     |
| "Ccdc91"   | 8.2466841   | 9.046913    | 9.013903    | 9.472062    | 8.4080479   | 8.6939315   | 8.261131    | 9.312231    |
| "Ccdc92"   | 2.336555    | 2.3815207   | 2.3472643   | 2.4016829   | 2.3453994   | 2.3230245   | 2.3401785   | 2.4151886   |
| "Ccdc93"   | 4.7643363   | 5.4369025   | 4.71302575  | 4.8296144   | 4.8797388   | 5.1815325   | 4.7547166   | 4.7126279   |
| "Ccdc97"   | 4.7896242   | 5.17598985  | 4.66884875  | 4.7349405   | 4.8108374   | 4.98286715  | 4.72763315  | 5.1040995   |
| "Cck"      | 2.33631     | 2.4604168   | 2.3762484   | 2.4540234   | 2.3763428   | 2.3492496   | 2.3745532   | 2.4519293   |
| "Cckar"    | 2.5092044   | 2.6036794   | 2.540454    | 2.6573937   | 2.5410652   | 2.479089    | 2.5349932   | 2.6388779   |
| "Ccl1"     | 2.3554978   | 2.4155917   | 2.3993149   | 2.4684525   | 2.3987799   | 2.3545728   | 2.3943937   | 2.462976    |
| "Ccl11"    | 7.87515     | 8.668451    | 8.914985    | 9.425119    | 9.240255    | 8.627851    | 8.747544    | 9.299461    |
| "Ccl12"    | 2.248209    | 2.331833    | 2.457504    | 2.3984234   | 2.3178358   | 2.3166482   | 4.09611     | 2.3692174   |
| "Ccl19"    | 2.6072714   | 2.693662    | 2.6327217   | 2.6864414   | 2.6382275   | 5.8317275   | 2.6314774   | 2.6910207   |
| "Ccl2"     | 3.122526    | 3.0548058   | 2.982374    | 3.036962    | 2.9954634   | 2.8738713   | 3.5847304   | 3.0182383   |
| "Ccl21a"   | 6.697652    | 5.830972    | 8.424284    | 7.7909827   | 7.006213    | 9.663727    | 8.07955     | 5.8592925   |
| "Ccl22"    | 2.232469    | 2.2662754   | 2.2282078   | 2.4269857   | 2.246966    | 2.2257357   | 2.2056108   | 2.2712166   |
| "Ccl24"    | 2.6776056   | 2.2679186   | 2.7440784   | 2.7132382   | 2.6843765   | 2.621888    | 3.1264946   | 2.7154884   |
| "Ccl25"    | 5.057376    | 5.4028625   | 5.3794622   | 6.102934    | 4.761118    | 4.360588    | 6.075135    | 6.2833138   |
| "Ccl27a"   | 6.182491067 | 6.2969522   | 6.571741867 | 6.429053333 | 6.0609065   | 5.545631067 | 6.375993303 | 6.4144526   |
| "Ccl28"    | 2.52838885  | 2.6313813   | 2.5782471   | 2.70002465  | 2.57996825  | 2.5372908   | 2.5755622   | 2.6806655   |
| "Ccl5"     | 2.8391123   | 1.9841888   | 1.964112    | 2.0304153   | 1.9623883   | 6.9563155   | 1.9690263   | 2.0301626   |
| "Ccl6"     | 9.97382575  | 6.38757115  | 8.5394225   | 6.5079998   | 9.27820125  | 9.8698875   | 8.712719    | 7.47320475  |
| "Ccl7"     | 2.340182    | 2.365588    | 2.3240564   | 2.4097576   | 2.2972746   | 2.3267908   | 2.6237903   | 2.4074583   |
| "Ccl8"     | 4.902584    | 3.0481617   | 8.117603    | 5.313138    | 7.433215    | 8.464341    | 8.71339     | 6.4313254   |
| "Ccl9"     | 8.217793    | 4.37560345  | 6.9329959   | 5.38185915  | 7.10970365  | 7.9876778   | 7.34528065  | 6.0847664   |
| "Ccm2"     | 6.024297033 | 5.936663433 | 6.2846874   | 6.423301    | 6.120145867 | 6.378838933 | 6.570354333 | 6.2673861   |
| "Ccna2"    | 2.6799052   | 2.309456    | 2.58036555  | 2.3533801   | 2.3070247   | 2.5854961   | 2.3044614   | 2.3517363   |
| "Ccnb1"    | 2.362945    | 2.463714867 | 2.406017333 | 2.485153167 | 2.4064588   | 2.373542233 | 2.400931833 | 2.4877408   |
| "Ccnb2"    | 1.9408212   | 1.9461824   | 1.9782817   | 1.9948602   | 1.9298928   | 2.3640347   | 1.9465373   | 1.9957477   |
| "Ccnb3"    | 2.3292165   | 2.4060614   | 2.3671882   | 2.4619522   | 2.3624108   | 2.3241124   | 2.35822     | 2.4489517   |
| "Ccnc"     | 4.0305892   | 4.1810775   | 4.095010067 | 4.542827367 | 4.111003067 | 3.941641267 | 4.1790581   | 4.484130467 |
| "Ccnd1"    | 5.340480667 | 3.8770795   | 6.115360933 | 5.191647367 | 4.272267333 | 4.799245567 | 5.234841467 | 5.148542233 |
| "Ccnd2"    | 4.347793471 | 4.3133823   | 6.393576057 | 5.838683    | 6.275994729 | 6.233148057 | 6.8195981   | 6.128622457 |
| "Ccnd3"    | 5.8602715   | 5.703962    | 6.205299    | 5.980123    | 6.2695084   | 6.7612653   | 6.512945    | 5.843302    |
| "Ccndbp1"  | 8.377156    | 8.460147    | 8.3512535   | 8.14592     | 8.561769    | 8.467171    | 8.500997    | 8.388686    |
| "Ccne1"    | 2.6447895   | 2.4463825   | 2.427598    | 2.4278957   | 2.4274948   | 2.3872943   | 2.3981175   | 2.4721375   |
| "Ccne2"    | 4.8748946   | 5.6548047   | 5.5995593   | 6.9911513   | 5.703028    | 5.225719    | 5.337508    | 7.09482     |

|           |             |             |             |             |             |             |             |             |
|-----------|-------------|-------------|-------------|-------------|-------------|-------------|-------------|-------------|
| "Ccng1"   | 10.959562   | 11.05098933 | 11.60191567 | 11.98788367 | 11.099803   | 11.07061267 | 11.62414733 | 11.95622317 |
| "Ccng2"   | 7.784303    | 7.937145    | 6.2154754   | 6.4677065   | 7.879063    | 8.01157765  | 6.66692735  | 7.0033075   |
| "Ccnh"    | 8.0880761   | 7.905419467 | 8.895472667 | 8.992824233 | 8.272408167 | 7.606622833 | 8.756786667 | 9.006430333 |
| "Ccni"    | 9.722661333 | 9.518956    | 9.230630067 | 9.023799733 | 9.671484    | 9.775040667 | 9.462437333 | 9.244768667 |
| "Ccni"    | 3.1807916   | 3.3967636   | 3.5234437   | 4.4282146   | 3.4072893   | 3.2106774   | 3.4607189   | 3.8440113   |
| "Ccnk"    | 4.426431    | 6.9687967   | 5.8218927   | 6.996103    | 4.829971    | 4.78599     | 5.844348    | 5.891972    |
| "Ccnl1"   | 11.038659   | 10.394386   | 8.69089     | 8.376067    | 9.3966255   | 10.209466   | 9.134821    | 8.586749    |
| "Ccnl2"   | 7.4473059   | 7.819908133 | 7.162302567 | 6.989558    | 7.7939541   | 7.998419867 | 7.637039667 | 7.215807333 |
| "Ccni1"   | 2.3466363   | 2.5141525   | 2.37122     | 2.4281778   | 2.356438    | 2.4068875   | 2.3259306   | 2.415165    |
| "Ccni2"   | 6.775594    | 7.6990625   | 6.68556455  | 6.8496485   | 7.10430385  | 7.630093    | 6.70057635  | 6.96755285  |
| "Ccpg1"   | 8.153473    | 8.819416    | 7.695116    | 8.107043    | 8.370313    | 8.284222    | 7.646468    | 8.323632    |
| "Ccr1"    | 3.12108785  | 3.34326085  | 3.45844425  | 3.33604585  | 3.2704146   | 3.255541    | 3.5415115   | 3.33626035  |
| "Ccr2"    | 2.559863233 | 2.506579767 | 3.073938533 | 2.995818767 | 2.861510133 | 2.8322276   | 3.160015567 | 2.9357068   |
| "Ccr5"    | 2.93003085  | 3.1503762   | 2.97862315  | 3.10599315  | 2.98228155  | 2.9138693   | 2.99665495  | 3.0549815   |
| "Ccr6"    | 1.7132466   | 1.7381519   | 1.7254809   | 1.7821628   | 1.7240472   | 3.2785912   | 1.7291268   | 1.7825505   |
| "Ccr7"    | 2.05992     | 2.11208     | 2.0829475   | 2.1677191   | 2.085885    | 3.817864    | 2.083363    | 2.1598334   |
| "Ccr9"    | 2.3349077   | 2.42857525  | 2.39014125  | 2.4877387   | 2.40732395  | 2.6110038   | 2.3903509   | 2.4749452   |
| "Ccr12"   | 6.947795    | 7.000813    | 5.337675    | 5.5010047   | 7.1825333   | 5.4952283   | 5.110772    | 5.766907    |
| "Ccrn4l"  | 8.538484    | 6.564378    | 8.5926485   | 8.590993    | 7.640243    | 7.48888     | 8.744713    | 8.875217    |
| "Ccs"     | 8.244024    | 7.3616147   | 7.6797743   | 7.3569584   | 7.380117    | 7.2067766   | 7.606192    | 7.438798    |
| "Cct2"    | 11.46820233 | 11.567145   | 11.407821   | 11.4234305  | 11.50250533 | 11.51011733 | 11.39029367 | 11.52800933 |
| "Cct3"    | 7.055245317 | 7.185338983 | 7.11803575  | 7.057951667 | 7.016136783 | 7.310534033 | 7.122463733 | 7.118755717 |
| "Cct4"    | 8.44452158  | 8.5118031   | 8.46727768  | 8.55836868  | 8.52618888  | 8.5081803   | 8.52353676  | 8.64413816  |
| "Cct5"    | 10.574637   | 10.735963   | 11.1123085  | 10.89548    | 10.64626    | 10.592249   | 10.98122    | 10.920485   |
| "Cct6a"   | 11.09176    | 11.2020885  | 11.429868   | 11.4375645  | 11.1821285  | 11.387253   | 11.451135   | 11.4140575  |
| "Cct6b"   | 2.4783378   | 2.6950238   | 2.5391066   | 2.5963478   | 2.5256557   | 2.5204055   | 2.536609    | 2.5954988   |
| "Cct7"    | 9.8850255   | 9.996679    | 10.106193   | 10.026264   | 9.85074025  | 9.794392    | 10.386174   | 9.98381475  |
| "Cct8"    | 6.32421895  | 6.346202    | 6.32882435  | 6.5476052   | 6.2936537   | 6.2562709   | 6.38894125  | 6.5760224   |
| "Ccz1"    | 9.017632    | 9.739267    | 9.898202    | 9.86204     | 9.21413     | 9.190758    | 9.670736    | 9.798869    |
| "Cd109"   | 2.4420066   | 2.537734    | 2.9263728   | 2.5900822   | 2.5135655   | 2.4889288   | 2.4416728   | 2.5869412   |
| "Cd14"    | 10.234829   | 3.068418    | 5.029984    | 3.7999585   | 5.331368    | 6.3863935   | 5.957955    | 4.3612046   |
| "Cd151"   | 8.1593029   | 7.74488154  | 8.2353153   | 8.1664639   | 8.2748417   | 8.12495866  | 8.6091457   | 8.27897372  |
| "Cd160"   | 2.525086    | 2.6154578   | 2.5586791   | 2.66702505  | 2.57549765  | 2.55557015  | 2.57425435  | 2.63775523  |
| "Cd163"   | 9.527046    | 6.7032976   | 8.59945     | 7.6195645   | 9.405258    | 10.046544   | 8.760692    | 8.50855     |
| "Cd164"   | 11.725619   | 12.114978   | 11.771555   | 11.685832   | 11.804878   | 12.122514   | 11.783441   | 11.639959   |
| "Cd177"   | 2.3488305   | 2.3753018   | 2.345539    | 2.4569705   | 2.3522274   | 2.3421814   | 2.344864    | 2.443426    |
| "Cd19"    | 2.3106837   | 2.5308084   | 2.58524     | 2.6289406   | 2.4980428   | 4.6254625   | 2.492248    | 2.611084    |
| "Cd1d1"   | 6.507059367 | 3.056265967 | 6.3522758   | 3.926241933 | 6.883153333 | 5.515887467 | 6.881990267 | 5.7233088   |
| "Cd2"     | 2.6199384   | 2.6451192   | 2.658553    | 2.6955123   | 2.6594613   | 5.2019215   | 2.6379864   | 2.6893957   |
| "Cd200"   | 6.3862324   | 6.4160185   | 6.829465    | 7.200152    | 6.6979494   | 7.400205    | 7.0235157   | 7.388455    |
| "Cd209a"  | 2.398592    | 2.5013044   | 2.4946225   | 2.516039    | 2.4719472   | 2.4691532   | 2.5398936   | 2.5279589   |
| "Cd209b"  | 2.216197    | 2.2713861   | 2.2648845   | 2.3324363   | 4.1303577   | 7.1883087   | 2.2645931   | 2.3199759   |
| "Cd209d"  | 2.5460904   | 3.0184875   | 4.2463894   | 3.0380728   | 4.093069    | 3.071898    | 3.0025873   | 3.0585115   |
| "Cd209f"  | 4.959422    | 4.638158    | 6.883346    | 5.4459615   | 6.259201    | 5.276114    | 5.998365    | 5.5014453   |
| "Cd209g"  | 2.5619123   | 2.6501524   | 3.8018706   | 2.7061858   | 3.1497087   | 2.5730329   | 3.2448275   | 2.7459044   |
| "Cd22"    | 2.1253462   | 2.2630348   | 2.2597716   | 2.3108044   | 2.2614005   | 6.148775    | 2.2621417   | 2.3105009   |
| "Cd244"   | 2.5204145   | 2.66963575  | 2.6129326   | 2.7643876   | 2.610407    | 2.56250325  | 2.6023025   | 2.70492605  |
| "Cd247"   | 2.863625933 | 3.036938067 | 2.9592135   | 3.0679879   | 2.963563333 | 3.2156652   | 2.953101567 | 3.102578467 |
| "Cd248"   | 3.2001011   | 3.2487478   | 6.625474    | 5.101178    | 3.8364506   | 3.480149    | 4.624593    | 3.8987002   |
| "Cd24a"   | 11.022915   | 11.3434755  | 11.31761767 | 12.277139   | 11.34748333 | 11.36750967 | 11.223871   | 11.929151   |
| "Cd27"    | 2.6638446   | 4.3003674   | 2.7619212   | 3.4809656   | 2.76906     | 3.9744873   | 2.760496    | 2.8619711   |
| "Cd274"   | 2.594976    | 3.527318    | 3.721779    | 4.1742306   | 3.4878817   | 3.3215775   | 5.2515235   | 4.1120257   |
| "Cd276"   | 2.989246    | 2.9815307   | 3.5013938   | 3.2737138   | 2.9439313   | 2.6391382   | 3.012069    | 3.0154533   |
| "Cd28"    | 2.79116     | 2.4532592   | 2.8849263   | 4.38972425  | 2.7056096   | 2.9241595   | 3.4827435   | 3.56248575  |
| "Cd2ap"   | 4.980126133 | 5.239947367 | 4.778457867 | 4.921805167 | 5.0925875   | 5.027381667 | 4.8320976   | 4.9641736   |
| "Cd2bp2"  | 5.4016819   | 5.453249933 | 4.929425167 | 5.111387633 | 5.3439952   | 5.4870077   | 5.112255833 | 5.1729981   |
| "Cd300a"  | 4.7181225   | 2.6128578   | 2.607221    | 2.653618    | 2.6167214   | 4.425394    | 2.8324533   | 2.601762    |
| "Cd300ld" | 3.231811    | 2.6801753   | 2.7611358   | 2.8132308   | 2.5932653   | 2.7413151   | 3.612718    | 2.8049185   |
| "Cd300lf" | 3.8739855   | 3.1077902   | 2.9223802   | 2.9171476   | 3.0895748   | 3.7847033   | 3.4019313   | 3.1586366   |
| "Cd302"   | 11.517629   | 7.271694    | 8.540875    | 7.653876    | 9.037487    | 8.757594    | 8.871128    | 7.9546633   |
| "Cd320"   | 6.325196    | 5.729316    | 6.4338336   | 6.0362606   | 6.792859    | 6.4916387   | 6.5737233   | 6.5746627   |
| "Cd34"    | 7.683446    | 6.715399    | 9.460902    | 8.982971    | 8.568094    | 7.8814063   | 8.185057    | 8.998645    |
| "Cd36"    | 10.74063067 | 10.70760467 | 10.22137033 | 10.45935267 | 11.73844233 | 11.7556905  | 11.0853675  | 11.15846933 |
| "Cd37"    | 2.0774124   | 2.1460035   | 2.2056227   | 2.191697    | 2.4089236   | 6.294243    | 2.143429    | 2.1914976   |
| "Cd38"    | 4.985032    | 4.3263618   | 4.7960779   | 4.8740916   | 4.859331    | 5.5403184   | 4.70065315  | 5.1565026   |
| "Cd3d"    | 2.049481    | 2.1099436   | 2.0778365   | 2.1537938   | 2.0968397   | 6.3903103   | 2.0961313   | 2.176885    |
| "Cd3g"    | 2.5406525   | 2.593723    | 2.552913    | 2.6409147   | 2.5641687   | 4.739832    | 2.55293     | 2.6464272   |
| "Cd4"     | 2.7812164   | 2.8824043   | 2.8043766   | 2.949754    | 2.8083906   | 2.74549     | 2.8048759   | 2.926085    |
| "Cd40"    | 2.6234007   | 2.7130267   | 2.82755495  | 2.74771     | 2.6511651   | 2.6767386   | 2.6464273   | 2.73802185  |
| "Cd44"    | 5.11000655  | 2.9572016   | 4.7049718   | 4.3481636   | 4.0110569   | 4.4736583   | 4.82312485  | 4.32633595  |
| "Cd46"    | 2.6196537   | 3.043619    | 2.713869    | 2.8515606   | 2.7471309   | 2.767571    | 2.7261603   | 2.792618    |
| "Cd47"    | 8.622605    | 7.618380267 | 8.386613    | 7.927055667 | 8.459879    | 8.676729667 | 8.435967333 | 8.142913233 |
| "Cd48"    | 3.5494323   | 2.1356204   | 4.185599    | 3.274512    | 3.8054245   | 6.4838114   | 4.967696    | 3.6927438   |
| "Cd5"     | 2.0706213   | 2.1236784   | 2.114074    | 2.1772096   | 2.0968814   | 2.7437522   | 2.0946248   | 2.1738415   |
| "Cd52"    | 7.203623    | 2.4208422   | 6.35237     | 4.5855947   | 5.6875176   | 9.334622    | 7.002541    | 4.649704    |
| "Cd53"    | 7.974239    | 4.0254884   | 6.6418076   | 5.5427976   | 6.7846727   | 8.937265    | 7.6880584   | 5.84841     |
| "Cd55"    | 6.739486467 | 6.7787288   | 6.849386233 | 7.060023567 | 6.341539767 | 6.882741667 | 6.737859133 | 6.948683933 |
| "Cd59a"   | 8.41773925  | 7.605151    | 8.1828245   | 8.04646665  | 8.3514985   | 7.69050625  | 8.2391233   | 7.95649285  |
| "Cd5l"    | 9.48611     | 2.3662248   | 2.4744952   | 2.4181216   | 2.3804984   | 2.6238523   | 2.3274982   | 2.412336    |
| "Cd68"    | 8.368037    | 3.9753315   | 5.5345707   | 3.4088051   | 6.8278866   | 6.897823    | 8.90399     | 4.3269444   |
| "Cd72"    | 3.0390022   | 3.0758317   | 3.0519705   | 3.1052961   | 3.0234718   | 4.487439    | 3.050388    | 3.1015296   |

|            |             |             |             |             |             |             |             |             |
|------------|-------------|-------------|-------------|-------------|-------------|-------------|-------------|-------------|
| "Cd74"     | 6.146071    | 4.1806307   | 6.4404936   | 5.689845    | 6.156258    | 7.5338683   | 7.0517163   | 5.599206    |
| "Cd79b"    | 2.1991382   | 2.25793     | 2.2591226   | 2.3080149   | 2.2504067   | 7.6780767   | 2.2361867   | 2.2942173   |
| "Cd80"     | 2.535771633 | 2.714676267 | 2.606762367 | 2.7401665   | 2.604510133 | 2.5956816   | 2.5995886   | 2.69122933  |
| "Cd81"     | 10.911245   | 9.998439    | 11.339802   | 10.757396   | 10.973967   | 10.69766    | 11.108546   | 10.866543   |
| "Cd82"     | 8.518395    | 6.1061      | 6.6963525   | 5.7785873   | 6.151165    | 7.082226    | 7.385393    | 5.666113    |
| "Cd83"     | 2.8185818   | 2.5842285   | 2.8702092   | 2.9616227   | 2.8879833   | 4.176379    | 4.5339518   | 3.059111    |
| "Cd84"     | 4.5020137   | 2.8392057   | 3.3636627   | 2.2426243   | 3.334187    | 3.89635     | 3.4728215   | 2.2655542   |
| "Cd86"     | 2.75879     | 2.37051295  | 2.4800451   | 2.46328985  | 2.5064565   | 3.4022929   | 2.6290295   | 2.16924355  |
| "Cd8a"     | 2.6732364   | 2.837665    | 2.7393732   | 2.909269    | 2.7571154   | 3.0314493   | 2.7381744   | 2.758607    |
| "Cd8b1"    | 2.4140022   | 2.5397346   | 2.489248    | 2.5680833   | 2.4903505   | 2.807548    | 2.4892251   | 2.5661561   |
| "Cd9"      | 10.476524   | 10.081991   | 10.701269   | 9.998451    | 10.660898   | 9.946068    | 10.357097   | 10.148791   |
| "Cd93"     | 4.78997975  | 4.67408445  | 5.25322075  | 5.18133405  | 5.16305155  | 5.295499    | 5.30058575  | 5.42242975  |
| "Cd97"     | 7.4454975   | 7.1322174   | 7.45003     | 7.2936625   | 7.4365273   | 7.436251    | 7.756061    | 7.3260984   |
| "Cd99"     | 5.364776433 | 5.633425733 | 5.526373933 | 5.121004833 | 5.267821433 | 5.105069667 | 5.3274105   | 4.973582333 |
| "Cd99l2"   | 7.877691675 | 7.890971175 | 8.14948225  | 8.325231575 | 8.07058385  | 7.83268145  | 8.27109825  | 8.20112925  |
| "Cda"      | 4.5128164   | 2.1452692   | 2.148224    | 2.1834288   | 2.136895    | 2.067648    | 2.1359518   | 2.1988556   |
| "Cdadcl1"  | 5.88347924  | 6.30932876  | 5.49669208  | 5.6736821   | 5.68706948  | 5.7075543   | 5.27205122  | 5.77532176  |
| "Cdc123"   | 9.998594    | 9.803437    | 10.00527    | 9.959853    | 9.712017    | 9.571899    | 10.425887   | 9.945319    |
| "Cdc16"    | 8.863026    | 8.862531    | 9.034812    | 9.011492    | 8.911617    | 8.992489    | 8.602427    | 9.070678    |
| "Cdc20"    | 2.7166646   | 2.759392067 | 2.904818833 | 2.820200967 | 2.896961633 | 3.133251333 | 2.861805333 | 2.767736267 |
| "Cdc23"    | 4.705585    | 5.1432915   | 5.1141187   | 5.25501015  | 5.2502732   | 5.1118008   | 5.06848285  | 5.18598975  |
| "Cdc25a"   | 3.445078    | 3.5657377   | 4.52858125  | 4.213472    | 3.8303721   | 4.0456818   | 4.048544    | 4.733959885 |
| "Cdc25c"   | 2.4479032   | 2.5319886   | 2.5001752   | 2.593282    | 2.5001521   | 2.4504871   | 2.4936795   | 2.581423    |
| "Cdc26"    | 8.660232    | 8.8087225   | 8.825429    | 8.922387    | 8.691643    | 9.239382    | 8.79868     | 8.854983    |
| "Cdc27"    | 2.623453    | 2.7043586   | 2.6579635   | 2.7675903   | 2.6572187   | 2.6009574   | 2.6398602   | 2.7149003   |
| "Cdc34"    | 10.487044   | 10.617925   | 10.920577   | 10.989161   | 10.498997   | 10.021324   | 11.094099   | 10.754537   |
| "Cdc37"    | 5.70209455  | 5.63486035  | 5.9284411   | 5.9437124   | 5.74223095  | 5.6977225   | 5.84758975  | 5.8720617   |
| "Cdc37l1"  | 7.416147    | 7.374907567 | 6.907989433 | 7.188813967 | 7.43237     | 7.791012333 | 7.3283158   | 7.229517333 |
| "Cdc42"    | 9.187614    | 8.97494625  | 9.460880425 | 9.3140525   | 9.3847985   | 9.099224125 | 9.37923525  | 9.358381125 |
| "Cdc42bpa" | 4.1281877   | 5.3072977   | 4.633657    | 4.9327297   | 5.0238833   | 4.905645    | 4.9445405   | 4.929179    |
| "Cdc42ep1" | 5.9597893   | 6.024793    | 6.925795    | 6.546933    | 7.218771    | 6.53602     | 6.344693    | 6.6850724   |
| "Cdc42ep3" | 7.39274735  | 9.01670475  | 8.373314    | 8.8110675   | 7.77210015  | 7.9913615   | 7.75662725  | 8.4298313   |
| "Cdc42ep4" | 5.213956    | 5.3485206   | 5.2615925   | 4.76228855  | 5.5233663   | 5.40670725  | 5.1838327   | 5.30002745  |
| "Cdc42ep5" | 3.3452334   | 3.3166466   | 3.8313997   | 3.4425938   | 3.7034733   | 3.247253    | 3.468997    | 3.3324592   |
| "Cdc42se1" | 5.3076285   | 5.1957454   | 5.32138395  | 5.2649005   | 5.47887935  | 6.4030745   | 5.6431644   | 5.08980215  |
| "Cdc42se2" | 7.0673194   | 7.6252666   | 7.3048835   | 7.7187376   | 7.461589    | 7.6606326   | 7.2274117   | 7.5143123   |
| "Cdc45"    | 2.4722886   | 2.6345716   | 2.497947    | 2.5788932   | 2.3727422   | 2.3658252   | 2.8291366   | 2.5540311   |
| "Cdc51"    | 8.172138    | 8.63346975  | 8.2251645   | 8.2368865   | 8.150162    | 8.3766367   | 7.873957    | 8.2858125   |
| "Cdc6"     | 2.777748    | 2.8843138   | 2.8551288   | 2.9918423   | 2.824866    | 2.8231494   | 2.853629    | 2.9646916   |
| "Cdc7"     | 2.47549035  | 2.5910826   | 2.8496306   | 2.60041785  | 2.56198235  | 2.6036038   | 2.57973195  | 2.60500645  |
| "Cdc73"    | 4.8877065   | 5.593348275 | 5.144574275 | 5.525010325 | 5.114074175 | 4.993401225 | 5.0770661   | 5.364238775 |
| "Cdca3"    | 2.4108286   | 2.5162573   | 2.5181546   | 2.558535    | 2.5428157   | 2.661913    | 2.637059    | 2.5218005   |
| "Cdca4"    | 3.968230267 | 4.1224311   | 4.140835167 | 4.1616585   | 4.282521667 | 4.801674433 | 4.033879833 | 4.117601367 |
| "Cdca7"    | 3.5040443   | 3.557506    | 3.5158806   | 3.5985777   | 3.513992    | 3.5001886   | 3.4881835   | 3.5773015   |
| "Cdca7l"   | 2.2264957   | 2.3252668   | 2.324376    | 2.3629966   | 2.3372903   | 2.3197908   | 2.4730024   | 2.3579      |
| "Cdh1"     | 4.367538    | 3.0076914   | 3.9428606   | 3.0703356   | 2.969957    | 2.8917947   | 3.0477228   | 3.1564393   |
| "Cdh10"    | 2.5204232   | 2.665606    | 2.662911    | 2.6763942   | 2.5838757   | 2.5474677   | 2.5823092   | 2.6463022   |
| "Cdh11"    | 3.98673     | 3.3692636   | 6.518215    | 3.8505876   | 4.560491    | 4.2341895   | 3.9699855   | 4.877719    |
| "Cdh13"    | 5.219490867 | 5.2316839   | 5.470056    | 5.804915667 | 5.310371667 | 5.059871533 | 5.291956567 | 5.6850992   |
| "Cdh15"    | 6.869107    | 6.4740105   | 6.3348413   | 6.3325496   | 6.331387    | 5.8234954   | 7.2263017   | 6.296673    |
| "Cdh16"    | 2.369953    | 2.4620495   | 2.519929    | 2.6017284   | 2.4580173   | 2.395423    | 2.352669    | 2.5149326   |
| "Cdh2"     | 4.3975885   | 2.7479856   | 3.34135565  | 2.86479105  | 2.75573955  | 2.61428265  | 2.78635335  | 3.377368    |
| "Cdh20"    | 2.3931994   | 2.45426     | 2.4274566   | 2.5008607   | 2.427612    | 2.3999026   | 2.427074    | 2.496528    |
| "Cdh22"    | 2.308727    | 2.391111    | 2.3597775   | 2.443401    | 2.3647335   | 2.3226638   | 2.3617256   | 2.458796    |
| "Cdh3"     | 2.2708178   | 2.3419433   | 2.3937552   | 2.3918633   | 2.3172171   | 2.253886    | 2.2980266   | 2.3751423   |
| "Cdh4"     | 3.58438225  | 4.00749885  | 4.1164778   | 4.2099148   | 3.78824175  | 3.74074     | 3.7843319   | 4.82524145  |
| "Cdh5"     | 8.038989    | 7.784404    | 8.30003     | 8.335777    | 8.4438095   | 8.557137    | 8.315718    | 8.569644    |
| "Cdh8"     | 2.7195072   | 2.875814    | 2.7805965   | 2.9410305   | 2.7776349   | 2.7132673   | 2.771047    | 2.9101906   |
| "Cdh9"     | 2.6750946   | 2.8200774   | 2.738158    | 2.8816953   | 2.8682272   | 2.7190216   | 2.7894716   | 2.8446639   |
| "Cdh95"    | 2.4057753   | 2.4356499   | 2.4086084   | 2.4969363   | 2.4120507   | 2.3661423   | 2.3837943   | 2.4857202   |
| "Cdipt"    | 8.5345405   | 8.840875    | 8.66515515  | 8.99654975  | 8.55979     | 9.10645865  | 8.5110137   | 8.59937885  |
| "Cdk1"     | 2.577701    | 2.5097365   | 2.7177505   | 2.5011237   | 2.4631743   | 3.0168781   | 2.5131702   | 2.5008233   |
| "Cdk11b"   | 8.99941     | 9.647936    | 8.870316    | 8.953594    | 9.31942     | 9.440533    | 9.097285    | 8.9896965   |
| "Cdk12"    | 3.7801843   | 4.0931005   | 3.7987847   | 3.79271985  | 3.80246495  | 4.34280265  | 3.80404675  | 3.90048575  |
| "Cdk14"    | 3.173986    | 3.4207625   | 3.615898033 | 3.260719933 | 3.4133062   | 3.326987133 | 3.593536067 | 3.568298867 |
| "Cdk16"    | 8.1440578   | 8.353515467 | 8.481108567 | 8.630864667 | 8.104508233 | 8.346378267 | 8.381095867 | 8.501154433 |
| "Cdk18"    | 2.366986    | 2.3367531   | 2.3287437   | 2.4037244   | 2.324886    | 2.2813218   | 2.32336     | 2.4029927   |
| "Cdk2"     | 4.0658417   | 3.927335    | 4.023996    | 4.1528673   | 4.523632    | 4.3664227   | 4.1148214   | 4.2113895   |
| "Cdk20"    | 2.7077525   | 2.7246885   | 2.4327667   | 2.5756829   | 2.5179484   | 2.4934816   | 2.5132551   | 2.5735495   |
| "Cdk2ap1"  | 11.086205   | 11.14376867 | 11.47705817 | 11.47401833 | 10.928688   | 10.70990733 | 11.57386833 | 11.41689167 |
| "Cdk2ap2"  | 7.9738984   | 7.915393    | 7.5568895   | 7.3480105   | 8.195426    | 8.357001    | 7.8517647   | 7.392224    |
| "Cdk4"     | 6.434288867 | 6.3275499   | 6.625647733 | 6.6377098   | 6.5864334   | 6.428862167 | 7.071257933 | 6.641355    |
| "Cdk5"     | 6.3778343   | 6.047665    | 5.9403467   | 6.002341    | 6.1922603   | 5.6319757   | 6.5465755   | 6.1729274   |
| "Cdk5r1"   | 2.44520235  | 2.4769834   | 2.5066565   | 2.5311109   | 2.4217334   | 2.43797715  | 2.95476195  | 2.5206396   |
| "Cdk5rap1" | 7.2241073   | 7.1669745   | 6.7113204   | 6.5928006   | 7.6078925   | 7.623401    | 6.393311    | 7.1519747   |
| "Cdk5rap2" | 4.554532    | 4.626237    | 4.5990086   | 4.664706    | 4.583435    | 4.505091    | 4.590126    | 4.663747    |
| "Cdk5rap3" | 8.089879    | 7.7554846   | 7.9860506   | 7.6936154   | 7.8416543   | 7.1421084   | 8.379678    | 7.464585    |
| "Cdk7"     | 4.53178695  | 5.0575475   | 5.0845885   | 5.1655718   | 5.1252806   | 5.17230975  | 4.8009638   | 5.0414287   |
| "Cdk8"     | 8.009887    | 8.339765    | 7.754238    | 7.986832    | 8.250854    | 8.631242    | 8.003849    | 8.052995    |
| "Cdk9"     | 8.805756    | 9.12809     | 8.848888    | 8.345671    | 8.89315     | 9.360427    | 8.576225    | 8.532103    |
| "Cdkal1"   | 6.565838    | 9.40822     | 6.4550557   | 7.2995634   | 7.0529523   | 9.2619      | 6.430038    | 6.9972763   |

|              |             |             |             |             |             |             |             |             |
|--------------|-------------|-------------|-------------|-------------|-------------|-------------|-------------|-------------|
| "Cdkl2"      | 5.5134163   | 5.6799135   | 5.3875732   | 6.0545936   | 5.331486    | 5.4727397   | 5.5074716   | 5.4357786   |
| "Cdkn1a"     | 11.810853   | 11.539885   | 7.744632    | 6.0846058   | 10.7104195  | 11.2536505  | 9.021264    | 7.1007545   |
| "Cdkn1b"     | 6.8954938   | 7.15557125  | 6.776441    | 7.0309747   | 7.472963    | 7.155107    | 6.6455555   | 7.0475237   |
| "Cdkn1c"     | 8.621714    | 7.8364663   | 8.684845    | 7.96376     | 8.1300125   | 7.9490643   | 8.648396    | 8.135565    |
| "Cdkn2aipn1" | 7.1763716   | 8.037339    | 7.7739887   | 7.8927026   | 7.166361    | 7.1634626   | 7.5426884   | 7.202099    |
| "Cdkn2b"     | 4.44312     | 4.587348    | 5.286061    | 4.8752728   | 4.5093246   | 4.4260244   | 4.703347    | 4.5950947   |
| "Cdkn2c"     | 6.599718    | 7.151468    | 7.8893723   | 7.049318    | 7.366193    | 7.720097    | 8.785906    | 7.2158813   |
| "Cdkn2d"     | 6.9253917   | 6.4954557   | 7.081348    | 7.6229024   | 6.9529295   | 6.6891594   | 7.309641    | 7.8215976   |
| "Cdo1"       | 11.371002   | 6.393694    | 8.0705595   | 4.7463713   | 9.289925    | 9.143582    | 10.476968   | 7.205731    |
| "Cdr2"       | 2.5656848   | 2.5343704   | 3.2927296   | 2.5989802   | 2.8331156   | 2.5087016   | 2.7595701   | 2.6006534   |
| "Cdr2l"      | 3.5004396   | 4.1415057   | 4.5897903   | 4.2634273   | 4.017027    | 3.8245702   | 3.920602    | 3.559178    |
| "Cdr4"       | 2.7395673   | 2.8969858   | 2.8694859   | 2.9622262   | 2.8671665   | 2.8478398   | 2.8647087   | 2.946081    |
| "Cds2"       | 5.5100853   | 4.776599175 | 4.741398275 | 4.64865125  | 5.076742675 | 5.8186172   | 4.904862    | 4.8296727   |
| "Cdsn"       | 2.2374496   | 2.276556    | 2.5653048   | 2.3281524   | 2.2558155   | 2.213671    | 2.2546916   | 2.320481    |
| "Cdt1"       | 2.8565745   | 2.430505933 | 2.466878633 | 2.531487333 | 2.711012967 | 3.619624933 | 2.595620633 | 2.837120833 |
| "Cdv3"       | 9.87422025  | 9.3751535   | 9.63842565  | 9.9513885   | 9.4688688   | 9.1456335   | 10.146843   | 9.973778    |
| "Cdx1"       | 2.553123    | 2.6522748   | 2.585529    | 2.6698794   | 2.5863783   | 2.5650048   | 2.5788813   | 2.6639569   |
| "Cdx4"       | 2.3584087   | 2.4559422   | 2.39242     | 2.5084054   | 2.3986862   | 2.3558471   | 2.391706    | 2.4952638   |
| "Cdy1"       | 4.2889497   | 4.623950567 | 4.283969667 | 4.549277633 | 4.5958243   | 4.442278633 | 4.468427767 | 4.656255533 |
| "Ceacam1"    | 6.23759288  | 3.94536486  | 3.96029404  | 4.05993431  | 4.1475524   | 4.52949195  | 3.99353799  | 4.28843784  |
| "Ceacam10"   | 2.7057698   | 2.91883     | 2.7595925   | 2.9453428   | 2.7712526   | 2.6982896   | 2.7556942   | 2.8253248   |
| "Ceacam11"   | 2.4553697   | 2.55784325  | 2.4957602   | 2.64201035  | 2.50169645  | 2.4525727   | 2.49155885  | 2.5807065   |
| "Ceacam12"   | 2.4900086   | 2.5571022   | 2.4950104   | 2.6207807   | 2.5064745   | 2.468577    | 2.492861    | 2.5860515   |
| "Ceacam14"   | 2.8571095   | 3.0758245   | 2.948322    | 3.136684    | 2.958461    | 2.8694923   | 2.9421432   | 3.0823839   |
| "Ceacam2"    | 3.06862     | 3.3159266   | 3.1360075   | 3.2786992   | 3.1343486   | 3.089021    | 3.1139627   | 3.1764517   |
| "Cebpa"      | 5.1197643   | 3.8006835   | 4.130157    | 2.720836    | 4.946713    | 5.348404    | 5.988877    | 3.2212682   |
| "Cebpb"      | 11.938639   | 12.009533   | 9.08725635  | 9.52460965  | 11.130803   | 11.781645   | 10.580177   | 9.888404    |
| "Cebpd"      | 8.29411185  | 9.46062025  | 5.54739195  | 6.6194467   | 8.9087015   | 8.9844008   | 6.7449021   | 6.6384615   |
| "Cebpg"      | 7.208257467 | 7.5985629   | 7.198681067 | 7.685686    | 7.167368767 | 7.559874667 | 6.889559867 | 7.500485833 |
| "Cebpz"      | 6.0126387   | 6.32243765  | 5.8573255   | 6.08705215  | 6.01653165  | 5.9960043   | 6.01922795  | 5.9937064   |
| "Cecr5"      | 2.4018164   | 2.491776    | 2.4910004   | 2.9442098   | 2.6701372   | 2.4753354   | 2.494862    | 2.9776628   |
| "Cela1"      | 5.045613    | 2.412671    | 2.5565858   | 2.2949545   | 2.381065    | 2.9434855   | 2.9412067   | 2.299826    |
| "Cela2a"     | 5.4829535   | 2.3849566   | 2.3281095   | 2.4306543   | 2.3328602   | 2.2889628   | 2.323871    | 2.4294322   |
| "Cela3b"     | 4.90090268  | 2.46838178  | 2.40838684  | 2.52587876  | 2.41341578  | 2.3759199   | 2.4092416   | 2.5059464   |
| "Celf1"      | 6.36219608  | 6.71029452  | 7.00250432  | 7.01631212  | 6.7294182   | 6.74080644  | 6.99625914  | 6.75950206  |
| "Celf2"      | 9.5649625   | 10.05020167 | 10.25309517 | 9.977192    | 10.22178867 | 10.1011     | 10.33031867 | 10.25994733 |
| "Celf4"      | 2.4907      | 2.6583846   | 2.5843463   | 2.7327662   | 2.592864    | 2.5306406   | 2.5769503   | 2.691405    |
| "Celsr1"     | 2.363289    | 2.4447265   | 2.396201    | 2.4895205   | 2.3956187   | 2.3604457   | 2.3924627   | 2.4813812   |
| "Celsr2"     | 2.83881005  | 2.92933715  | 2.871634    | 3.3309647   | 2.9209603   | 2.50064485  | 2.95060565  | 3.0730419   |
| "Cend1"      | 2.948183425 | 3.193746925 | 3.167389875 | 3.125605075 | 3.023726325 | 2.958261225 | 2.973268525 | 3.082343525 |
| "Cenpa"      | 4.292685    | 3.0363567   | 4.065527    | 4.1054997   | 4.170179    | 4.1849      | 4.025014    | 4.443303    |
| "Cenpb"      | 6.1973906   | 6.268354    | 6.3884106   | 6.649554    | 6.243127    | 6.1463137   | 6.2603817   | 6.3473635   |
| "Cenpc1"     | 3.2356055   | 2.6870384   | 4.0241437   | 4.0599003   | 3.4135363   | 3.3498664   | 3.529989    | 4.757514    |
| "Cenpe"      | 2.6223195   | 2.7892005   | 2.6728976   | 2.817656    | 2.6865113   | 2.665195    | 2.672861    | 2.7940187   |
| "Cenph"      | 2.5878167   | 2.785117    | 2.6535416   | 2.776115    | 2.6660528   | 2.5657868   | 2.6539478   | 2.7793102   |
| "Cenpk"      | 2.793483    | 2.875244    | 3.1318638   | 2.89355     | 2.8396444   | 2.7957795   | 2.8361113   | 2.8659492   |
| "Cenpo"      | 2.8939624   | 3.0869427   | 2.917909    | 3.092282    | 2.9520729   | 2.874922    | 2.9096744   | 3.0614958   |
| "Cenpq"      | 5.9910946   | 7.00737     | 5.6162834   | 5.8580904   | 5.909872    | 6.0533347   | 5.526598    | 6.0562453   |
| "Cenpt"      | 2.6471834   | 2.6008072   | 3.0618172   | 2.703892    | 2.6337337   | 2.7462373   | 2.676079    | 2.7488477   |
| "Cenpv"      | 7.620677    | 8.148785    | 8.091102    | 7.7612267   | 8.164764    | 7.719975    | 8.238231    | 7.9186854   |
| "Cep110"     | 4.6341324   | 5.422856    | 4.9801493   | 4.959526    | 4.388473    | 5.4771624   | 4.7482476   | 4.970955    |
| "Cep152"     | 2.7954943   | 2.6977232   | 2.6718445   | 2.7461312   | 2.7005563   | 2.9534078   | 2.7092474   | 2.7433708   |
| "Cep250"     | 2.539542    | 2.7039995   | 2.5840783   | 2.729954    | 2.5825648   | 2.5449955   | 2.5785027   | 2.7074409   |
| "Cep290"     | 3.3656952   | 3.6214962   | 3.5363543   | 3.9397633   | 3.539847    | 3.3020923   | 3.514204    | 3.7763145   |
| "Cep350"     | 6.3600495   | 6.833948    | 6.73435285  | 6.871591    | 6.5787752   | 6.72310215  | 6.6166578   | 6.679189    |
| "Cep55"      | 2.2532805   | 2.3441305   | 2.2881384   | 2.3887261   | 2.2923623   | 2.4024703   | 2.28483155  | 2.37889945  |
| "Cep5711"    | 3.5085018   | 5.0279255   | 3.58362855  | 3.79672625  | 3.87495755  | 4.21330735  | 3.5346848   | 3.69303885  |
| "Cep68"      | 4.485020625 | 4.603235375 | 4.425929825 | 4.85372425  | 4.8851207   | 4.618222675 | 4.6345342   | 4.7882721   |
| "Cep70"      | 3.0733105   | 3.23327585  | 3.313614    | 3.3359797   | 3.282832    | 3.11793245  | 3.28988025  | 3.4902276   |
| "Cept1"      | 9.516881    | 9.012898    | 10.084707   | 9.433995    | 9.426869    | 9.874484    | 9.303489    | 9.824581    |
| "Cer1"       | 2.3090248   | 2.3914497   | 2.3525035   | 2.4208133   | 2.3536305   | 2.3046489   | 2.3525624   | 2.4250371   |
| "Cerk"       | 5.4542108   | 4.6909924   | 4.8061824   | 3.9350042   | 5.7260823   | 6.8009033   | 5.578697    | 4.6732116   |
| "Ces1c"      | 12.068588   | 3.274404    | 5.901106    | 2.8985274   | 3.6743994   | 2.7692137   | 2.771342    | 3.52947     |
| "Ces1d"      | 7.725239    | 6.347486933 | 8.222874567 | 6.873254667 | 9.533328667 | 8.492272767 | 8.318242833 | 7.7315689   |
| "Ces1e"      | 3.573213    | 2.9767537   | 3.040636    | 3.064873    | 2.9313455   | 2.81288     | 2.8710265   | 3.0264156   |
| "Ces1f"      | 5.6160684   | 2.6131785   | 3.2900383   | 2.8506553   | 6.2118917   | 6.965225    | 8.0791855   | 4.6041446   |
| "Ces1g"      | 8.264779    | 2.554441    | 2.5017824   | 2.6177804   | 2.4840174   | 2.448159    | 2.4912238   | 2.5962906   |
| "Ces2a"      | 5.806677    | 2.2477114   | 2.2192624   | 2.3050296   | 2.2169812   | 2.1801999   | 2.211055    | 2.2965055   |
| "Ces2c"      | 3.76154     | 2.6294255   | 2.5948286   | 2.6907043   | 2.589506    | 2.5219164   | 4.041887    | 2.674848    |
| "Ces2e"      | 4.1226845   | 2.9024534   | 2.8597648   | 2.9861708   | 2.8771486   | 2.8260474   | 2.8188832   | 2.9503605   |
| "Ces2g"      | 2.7158074   | 2.847321    | 2.9258199   | 2.7324567   | 2.749641    | 2.6653576   | 2.7457561   | 2.835877    |
| "Ces3a"      | 8.168003    | 2.715075    | 2.6559072   | 2.763339    | 3.3333185   | 2.553096    | 2.6328478   | 3.7002409   |
| "Ces4a"      | 2.4206173   | 2.5047464   | 2.4396527   | 2.5067878   | 2.4393995   | 2.416099    | 2.437648    | 2.4897363   |
| "Cetn2"      | 8.333072    | 8.37005765  | 8.857982    | 8.9545522   | 8.2595058   | 8.142323    | 8.67556325  | 8.84832375  |
| "Cetn3"      | 8.386263    | 8.335112    | 8.280747    | 8.834241    | 8.5386305   | 8.11908     | 8.30043     | 8.83403     |
| "Cfd"        | 10.818361   | 11.362738   | 12.738193   | 9.9680605   | 14.09993    | 14.366775   | 14.655244   | 12.3956785  |
| "Cfdp1"      | 7.7603946   | 8.03356     | 7.9315295   | 7.668901    | 7.6088448   | 8.076279    | 8.026364    | 7.90508     |
| "Cfh"        | 9.9350165   | 7.5926256   | 7.28822725  | 7.24027945  | 7.6899576   | 8.3606575   | 7.240658    | 7.49551165  |
| "Cfhr1"      | 7.112573    | 3.219853    | 3.152073    | 3.2996776   | 3.2166445   | 3.022437    | 3.128212    | 3.254784    |
| "Cfhr2"      | 4.436454    | 2.51788115  | 2.45294575  | 2.55295885  | 2.4534203   | 2.4174595   | 2.45146835  | 2.549172    |
| "Cfi"        | 10.737947   | 2.1895626   | 2.8008795   | 2.2472427   | 2.3749523   | 2.1239786   | 2.1536179   | 2.2657511   |

|           |             |             |             |             |             |             |             |             |
|-----------|-------------|-------------|-------------|-------------|-------------|-------------|-------------|-------------|
| "Cfl1"    | 9.948069    | 8.90165     | 10.220568   | 9.501214    | 9.714209    | 10.358037   | 10.165369   | 9.492738    |
| "Cfl2"    | 12.178041   | 12.121111   | 12.27053    | 12.4347125  | 12.154919   | 11.949703   | 12.4418015  | 12.5162305  |
| "Cflar"   | 4.507284975 | 4.143928225 | 4.7549995   | 4.784649825 | 4.786029825 | 4.689088825 | 4.662643425 | 4.800230125 |
| "Cfp"     | 6.5119014   | 2.3817313   | 4.803898    | 3.3988447   | 5.274725    | 5.6133933   | 4.8290377   | 3.4763982   |
| "Cftr"    | 2.76879515  | 3.01586605  | 2.8450973   | 3.01987335  | 2.85921385  | 2.8008522   | 2.8306787   | 2.9528267   |
| "Cggbp1"  | 8.149151    | 7.5536995   | 8.651086    | 8.203679    | 8.503251    | 8.704166    | 8.652387    | 8.19093     |
| "Cgni1"   | 3.3974688   | 2.9018637   | 3.386742033 | 2.742486167 | 3.384881167 | 3.019573033 | 3.379736167 | 3.010315867 |
| "Cgref1"  | 2.7132512   | 2.81781285  | 3.30757665  | 2.91182125  | 2.7514565   | 2.69694295  | 3.3401527   | 2.87983015  |
| "Chac1"   | 10.721513   | 11.016046   | 8.166897    | 10.446536   | 11.14171    | 10.649106   | 8.80514     | 10.3767605  |
| "Chac2"   | 8.143675    | 7.391671    | 8.930155    | 9.130601    | 8.413338    | 7.653871    | 8.739819    | 9.326845    |
| "Chad"    | 3.9390593   | 4.0261273   | 9.098547    | 7.2549324   | 3.4765544   | 3.440839    | 3.5232387   | 7.614661    |
| "Chaf1b"  | 2.3122795   | 2.3437462   | 2.3226078   | 2.4343052   | 2.3255222   | 2.2859366   | 2.297961    | 2.3898473   |
| "Chchd1"  | 11.357067   | 11.511898   | 11.8154335  | 11.959206   | 11.434233   | 10.898074   | 11.771348   | 11.863218   |
| "Chchd10" | 13.1036405  | 13.413486   | 13.282507   | 13.567353   | 13.42837725 | 13.353726   | 13.136162   | 13.447841   |
| "Chchd2"  | 14.286063   | 14.115105   | 14.258706   | 14.548356   | 14.2949705  | 14.140963   | 14.347681   | 14.570444   |
| "Chchd3"  | 8.165481    | 7.7299299   | 8.563956    | 8.8869313   | 7.9439261   | 7.74313765  | 8.58786635  | 8.6138656   |
| "Chchd4"  | 7.383816    | 6.92869     | 7.6475      | 7.972849    | 7.458493    | 7.326423    | 7.613331    | 7.5484157   |
| "Chchd5"  | 4.8582064   | 5.09568965  | 4.6855147   | 4.82595485  | 4.6538968   | 4.6780821   | 4.992394    | 4.60471675  |
| "Chchd6"  | 5.34290735  | 5.3032225   | 5.92354665  | 5.77998965  | 6.32993105  | 6.31660605  | 6.66925825  | 5.8668308   |
| "Chchd7"  | 9.307302    | 9.28393     | 9.404433    | 9.47204     | 9.333477    | 8.953645    | 9.5582695   | 9.273452    |
| "Chd1"    | 4.678918033 | 4.149869067 | 3.458726333 | 3.496810533 | 4.240969467 | 4.515763067 | 3.241325567 | 3.412523767 |
| "Chd1l"   | 7.3434515   | 7.6994863   | 7.772662    | 7.931432    | 7.664348    | 7.662452    | 7.5478663   | 7.8385124   |
| "Chd4"    | 7.364783467 | 7.461750667 | 7.587946567 | 7.6312572   | 7.640633133 | 7.693493467 | 7.852522333 | 7.702830333 |
| "Chd6"    | 6.0554433   | 7.5242243   | 5.572765    | 5.66979     | 5.3696547   | 5.986088    | 5.2203107   | 5.5693254   |
| "Chd7"    | 7.70365     | 8.81621     | 6.128292    | 6.8009915   | 7.0680556   | 7.676322    | 6.4657955   | 6.710302    |
| "Chd8"    | 6.684416    | 7.2310104   | 6.602762    | 6.9157376   | 6.7753506   | 7.0273027   | 6.9906564   | 7.0005403   |
| "Chdh"    | 6.595136    | 2.705562    | 3.58599     | 3.231264    | 5.046237    | 3.6183963   | 5.482135    | 3.3262503   |
| "Chek1"   | 2.502613467 | 2.650194    | 2.5582996   | 2.6934811   | 2.5641312   | 2.512971467 | 2.5602963   | 2.665975467 |
| "Chek2"   | 2.558567    | 2.7064831   | 2.7289891   | 2.8246381   | 2.7425728   | 2.7340403   | 2.9349425   | 2.8740337   |
| "Cherp"   | 6.487286    | 7.2750083   | 6.52433655  | 7.0500773   | 6.8498355   | 7.691351    | 6.6919675   | 7.1900528   |
| "Chfr"    | 8.0690465   | 9.6825095   | 7.881155    | 8.00199135  | 8.6080975   | 8.9026295   | 7.71245005  | 8.1404788   |
| "Chi3i1"  | 3.1836812   | 2.452913    | 2.3963823   | 2.4885914   | 2.4325926   | 2.4142597   | 2.432482    | 2.5063694   |
| "Chi3i3"  | 5.95695325  | 2.5817572   | 2.5591884   | 2.63354385  | 2.5493851   | 7.4062065   | 2.96292105  | 2.6275166   |
| "Chi3i4"  | 2.9358144   | 3.1731036   | 3.0944698   | 3.2276247   | 3.0946002   | 3.044273    | 3.0693352   | 3.1628575   |
| "Chic2"   | 9.3926325   | 9.523425    | 8.277636    | 8.133421    | 9.350347    | 9.880331    | 8.533418    | 8.3321905   |
| "Chid1"   | 3.54206265  | 3.024642    | 2.99548665  | 3.1063004   | 3.0872592   | 3.31412695  | 3.7934548   | 3.17001615  |
| "Chka"    | 5.3955555   | 2.9360166   | 2.5691364   | 2.6453822   | 2.9339797   | 3.5179725   | 2.566904    | 2.6362295   |
| "Chkb"    | 8.41063     | 8.899644    | 7.786043    | 7.9161825   | 8.933784    | 8.463073    | 7.8088064   | 7.870638    |
| "Chl1"    | 2.3907485   | 2.4943497   | 2.425298    | 2.5385048   | 2.429217    | 2.3461864   | 2.4197311   | 2.5046668   |
| "Chm"     | 7.5399356   | 8.024667    | 7.765627    | 7.7632513   | 7.570494    | 7.7252674   | 7.4778905   | 7.7392035   |
| "Chmp1a"  | 8.748648    | 8.653507    | 8.60615     | 8.0051155   | 8.140635    | 8.3353      | 8.489143    | 7.9988737   |
| "Chmp1b"  | 7.983715    | 8.349396    | 8.160617    | 8.682835    | 8.1316335   | 8.32852515  | 8.0478222   | 8.4918835   |
| "Chmp2a"  | 10.544452   | 10.557561   | 10.574484   | 10.485778   | 10.493173   | 10.174283   | 10.713484   | 10.7373771  |
| "Chmp3"   | 6.39292725  | 6.34702385  | 6.44385455  | 6.60361115  | 6.21661065  | 6.24540855  | 6.6425893   | 6.75376815  |
| "Chmp4b"  | 10.085384   | 10.4862185  | 10.4266805  | 10.6858595  | 10.277196   | 10.232832   | 10.3895225  | 10.4553285  |
| "Chmp4c"  | 2.80327105  | 3.01158405  | 2.907873    | 3.07433605  | 2.91698195  | 2.85574905  | 2.9034947   | 3.0346745   |
| "Chmp5"   | 9.3189535   | 8.7356      | 9.493434    | 9.354917    | 9.522652    | 9.329056    | 9.6898      | 9.502622    |
| "Chmp6"   | 7.357038    | 7.7998176   | 7.6078396   | 7.546144    | 7.3979993   | 7.433539    | 7.6723986   | 7.199625    |
| "Chmp7"   | 8.052562    | 8.43357     | 8.406716    | 8.529779    | 8.202698    | 8.128195    | 8.573907    | 8.570297    |
| "Chn1"    | 2.6413374   | 2.6916919   | 2.6567328   | 2.744979    | 2.9154468   | 2.6974142   | 3.1597567   | 2.7382638   |
| "Chn2"    | 3.2799083   | 2.9009529   | 2.8583838   | 2.96070115  | 2.85587035  | 2.7910507   | 2.88335505  | 2.9468878   |
| "Chodl"   | 5.5296807   | 6.276984    | 7.2399087   | 7.3591027   | 6.3817987   | 6.0249615   | 5.670384    | 7.865635    |
| "Chordc1" | 9.409429    | 9.601186    | 9.966346    | 10.141119   | 9.681142    | 10.012473   | 10.014343   | 10.172391   |
| "Chpf2"   | 3.586186    | 4.1950126   | 3.585728    | 3.6166487   | 3.5889728   | 4.0487657   | 3.34257     | 3.052214    |
| "Chpt1"   | 8.64584265  | 8.5207426   | 8.9034965   | 9.228330375 | 9.283792625 | 9.45753625  | 9.555863375 | 9.42173875  |
| "Chrac1"  | 9.859839    | 10.412617   | 10.293407   | 10.363553   | 9.783371    | 9.685273    | 10.184873   | 10.064345   |
| "Chrd"    | 2.8827798   | 2.9211273   | 2.8992057   | 2.9402113   | 3.674339    | 2.8379807   | 3.3825727   | 2.9691243   |
| "Chrd1l"  | 2.5384479   | 2.65550875  | 2.98605965  | 2.66832925  | 2.67941785  | 2.6341432   | 2.56930265  | 2.70692445  |
| "Chrna1"  | 9.420744    | 7.2658987   | 7.494667    | 7.3446107   | 6.9689927   | 5.9331846   | 9.473573    | 7.626371    |
| "Chrna4"  | 2.2927656   | 2.5331204   | 2.34199     | 2.460967    | 2.343552    | 2.3107007   | 2.3472538   | 2.4122589   |
| "Chrna6"  | 2.5657682   | 2.697547    | 2.6198308   | 2.6914127   | 2.6506014   | 2.5764623   | 2.6208577   | 2.691719    |
| "Chrn1b"  | 9.187756    | 9.418039    | 8.162365    | 8.042607    | 8.290138    | 8.008706    | 8.88111     | 8.092033    |
| "Chrn4"   | 2.580561    | 2.6547155   | 2.6447036   | 2.9364438   | 2.6525598   | 2.622499    | 2.6766107   | 2.6852524   |
| "Chrnd"   | 2.4242754   | 2.4914699   | 2.4696121   | 2.5278063   | 2.467886    | 2.4204996   | 2.4743443   | 2.496721    |
| "Chrne"   | 2.538834    | 2.5502324   | 2.5482082   | 2.9974537   | 2.2470307   | 2.23968     | 2.5460014   | 2.5730164   |
| "Chst1"   | 4.080852    | 5.3122287   | 6.100389    | 5.2355084   | 7.7849135   | 7.609316    | 7.705301    | 6.414306    |
| "Chst11"  | 3.0853322   | 3.48724375  | 3.33452825  | 3.44375715  | 3.5441977   | 3.2156994   | 3.1611143   | 3.3988925   |
| "Chst12"  | 2.219247    | 2.4020467   | 2.4022827   | 2.4357672   | 2.4043663   | 2.3824687   | 2.2655923   | 2.4360688   |
| "Chst14"  | 3.6227722   | 4.0603976   | 4.0860863   | 4.0879345   | 4.037951    | 4.2233124   | 4.083503    | 4.094014    |
| "Chst15"  | 3.08479635  | 3.4287435   | 3.16592515  | 2.9639976   | 3.5381132   | 4.25713665  | 3.3728534   | 2.869036    |
| "Chst2"   | 2.416735    | 2.5236104   | 2.4735205   | 2.5783656   | 2.536914    | 2.415062    | 2.466639    | 2.5870523   |
| "Chst3"   | 2.221051    | 2.5421278   | 2.2498817   | 2.3794954   | 2.2494967   | 2.222071    | 2.2470586   | 2.3181095   |
| "Chst4"   | 2.3970218   | 2.4859147   | 2.4452977   | 2.5615149   | 2.4532623   | 2.413698    | 2.4448872   | 2.52903     |
| "Chst5"   | 2.4261527   | 2.528504    | 2.4695542   | 2.594079    | 2.476322    | 2.4682827   | 2.4689083   | 2.560851    |
| "Chst7"   | 2.5669005   | 2.459982    | 2.617141    | 2.7320063   | 2.6759975   | 2.6160977   | 2.6383355   | 3.044158    |
| "Chtf8"   | 5.702031    | 5.7064466   | 5.572544    | 5.4328704   | 5.8681693   | 6.4941053   | 6.099682    | 5.267334    |
| "Chuk"    | 6.68455565  | 7.0865205   | 6.38381115  | 6.9209535   | 7.2044205   | 7.1088663   | 6.9797307   | 7.0914535   |
| "Churc1"  | 10.469986   | 10.452707   | 10.552307   | 10.587705   | 10.663883   | 10.142025   | 10.540077   | 10.627791   |
| "Ciao1"   | 9.01003     | 9.473332    | 8.893311    | 8.945762    | 9.454205    | 9.195371    | 8.889238    | 8.871915    |
| "Ciapin1" | 7.4795693   | 7.03473615  | 6.45498085  | 7.03321625  | 7.36734325  | 6.98470665  | 6.9628091   | 7.009285    |
| "Cib1"    | 7.676417    | 6.079531    | 6.26227     | 5.792546    | 6.6709223   | 7.245798    | 6.873287    | 6.094429    |

|           |             |             |             |             |             |             |             |             |
|-----------|-------------|-------------|-------------|-------------|-------------|-------------|-------------|-------------|
| "Cib2"    | 9.611133    | 10.129393   | 10.856858   | 10.716998   | 9.638908    | 9.890773    | 10.456971   | 10.440311   |
| "Cic"     | 6.045862    | 6.1151123   | 5.590213    | 5.7641177   | 6.1180205   | 6.3255324   | 5.9367833   | 5.9591804   |
| "Cidea"   | 3.5328283   | 4.3541913   | 2.9479907   | 2.440261    | 6.4867377   | 6.2889967   | 5.809885    | 3.5826302   |
| "Cideb"   | 6.269945    | 2.089685    | 2.1005232   | 2.1330922   | 2.0560505   | 2.0230024   | 2.0519779   | 2.1341689   |
| "Cidec"   | 6.67895     | 7.914032    | 6.9392686   | 3.751633    | 10.427577   | 11.761765   | 9.921686    | 6.812711    |
| "Ciita"   | 2.1590703   | 2.2009404   | 2.6955588   | 2.244837    | 2.1772974   | 3.0821183   | 2.1768      | 2.2462583   |
| "Cilp2"   | 1.8669577   | 2.1264749   | 4.582575    | 2.7707891   | 2.12725     | 2.392093    | 2.1250439   | 2.6855087   |
| "Cinp"    | 7.167963    | 7.2881336   | 7.289419    | 7.985646    | 7.2070003   | 7.2574053   | 7.064472    | 7.7958217   |
| "Cir1"    | 7.660993    | 8.250599    | 6.3584013   | 7.1300607   | 7.787887    | 7.7755237   | 6.5887594   | 7.0800366   |
| "Cirbp"   | 8.019496    | 9.118992    | 7.290033    | 7.861259    | 8.340019    | 7.6604443   | 7.347731    | 7.2272215   |
| "Cirh1a"  | 8.078075    | 8.846554    | 7.4868445   | 7.8028836   | 8.273032    | 8.489568    | 7.80725     | 7.608545    |
| "Cisd1"   | 12.097767   | 12.08365    | 12.3916655  | 12.610299   | 12.154782   | 11.885356   | 12.16831    | 12.5846855  |
| "Cish"    | 6.4211454   | 5.690798    | 3.2442148   | 6.7511      | 5.6466246   | 4.354611    | 5.5982237   | 4.0002384   |
| "Cit"     | 2.72066715  | 2.84796395  | 2.82277365  | 3.0027459   | 2.82492305  | 2.79955975  | 2.80629705  | 2.892447    |
| "Cited1"  | 2.360487    | 2.3713036   | 2.3242537   | 2.4162717   | 2.357006    | 2.320511    | 2.3960364   | 2.4126868   |
| "Cited2"  | 7.382554    | 8.0245657   | 6.49331815  | 7.063891    | 7.8146275   | 7.151299    | 6.99238765  | 7.0232095   |
| "Ciz1"    | 6.405304    | 6.76924     | 6.239005    | 6.3938875   | 6.2031775   | 6.357307    | 6.3254285   | 6.26405     |
| "Ckap2"   | 2.5533125   | 2.6210117   | 2.6232424   | 2.7091603   | 2.6485734   | 2.5163841   | 2.6164854   | 2.7687337   |
| "Ckap4"   | 4.35392495  | 3.93072125  | 5.13483475  | 4.39741275  | 4.167866975 | 4.290590575 | 4.6508688   | 4.49171935  |
| "Ckap5"   | 6.0200276   | 6.900988    | 6.595763    | 6.594822    | 6.849762    | 6.2421274   | 6.386586    | 6.9052763   |
| "Ckb"     | 5.994014    | 4.960473    | 7.680872    | 6.207883    | 5.903495    | 5.4466486   | 6.7938824   | 6.0755587   |
| "Cklf"    | 2.7885407   | 2.861076633 | 2.855877983 | 2.857541617 | 2.855352767 | 3.337976883 | 2.838776883 | 2.8902976   |
| "Ckm"     | 15.07213    | 15.348587   | 15.377195   | 15.154727   | 15.217182   | 15.185952   | 15.233098   | 15.159625   |
| "Ckmt1"   | 2.60105625  | 2.7004244   | 2.65136435  | 2.78945515  | 2.6521375   | 2.57454765  | 2.64511075  | 2.74403415  |
| "Ckmt2"   | 13.362668   | 12.818386   | 13.244746   | 13.820512   | 13.692026   | 13.266372   | 13.014342   | 13.990217   |
| "Cks1b"   | 5.62301465  | 6.05818425  | 7.06537115  | 6.2831492   | 6.5155882   | 6.8524385   | 7.3170822   | 6.38134815  |
| "Cks2"    | 5.86701155  | 2.89978585  | 3.85904025  | 3.1314473   | 3.3149716   | 4.9736972   | 3.4923439   | 3.2672367   |
| "Clasp1"  | 5.966686    | 5.85754375  | 6.38669415  | 6.38948195  | 6.0108721   | 5.7801204   | 6.38693095  | 6.2774085   |
| "Clasp2"  | 4.584832067 | 4.6117785   | 4.8509376   | 5.004371167 | 4.812224533 | 4.465357    | 4.742495233 | 4.979536367 |
| "Clasrp"  | 7.087298    | 7.641306    | 6.9511905   | 6.9746537   | 7.389565    | 7.4897475   | 7.0544457   | 6.8710637   |
| "Clca1"   | 3.875366567 | 2.625416867 | 3.291282667 | 2.448651467 | 2.5653447   | 4.6704873   | 2.558603667 | 2.599972567 |
| "Clca2"   | 2.9043815   | 3.028633    | 6.237973    | 3.0839667   | 2.9397523   | 2.86914     | 2.9220688   | 3.0540027   |
| "Clca3"   | 2.9260445   | 3.058061    | 2.9437048   | 2.996441    | 2.9538498   | 2.8864143   | 2.9518676   | 3.0418239   |
| "Clca4"   | 2.4748466   | 2.5857992   | 2.5241725   | 2.6512566   | 2.5312643   | 2.4805746   | 2.5243902   | 2.6315777   |
| "Clcc1"   | 7.176666525 | 8.00927595  | 7.14764075  | 7.43385305  | 7.407954    | 7.713135    | 7.28521665  | 7.56011575  |
| "Clcf1"   | 3.24759005  | 3.38920015  | 3.30630865  | 3.44127165  | 3.28750135  | 3.5576674   | 3.24734235  | 3.4127297   |
| "Clcn1"   | 3.365263    | 3.8998532   | 4.954277    | 5.2062716   | 3.9642706   | 2.5325415   | 4.7618346   | 4.4517517   |
| "Clcn2"   | 2.412982    | 2.3583252   | 2.2844412   | 2.3935466   | 2.3685362   | 2.2815776   | 2.3111498   | 2.3739872   |
| "Clcn3"   | 7.2614332   | 7.1879951   | 7.763122725 | 7.7928115   | 7.6400455   | 6.910132225 | 7.7887329   | 7.973704825 |
| "Clcn4-2" | 8.2598095   | 7.980643    | 8.8381825   | 8.851404    | 8.6045825   | 8.4748915   | 8.3294165   | 8.8303715   |
| "Clcn5"   | 3.0790508   | 2.8701835   | 4.466357    | 3.1940484   | 3.08915     | 3.2725594   | 3.8124866   | 3.3535416   |
| "Clcn7"   | 3.04324885  | 3.11719665  | 3.1407528   | 3.2490074   | 3.1014453   | 3.0749824   | 3.09467785  | 3.1628585   |
| "Clcn1"   | 4.1866238   | 3.7978788   | 4.0618085   | 3.91201735  | 4.0896898   | 3.4705433   | 3.8708647   | 4.0169837   |
| "Clcn11"  | 2.7480183   | 2.9539948   | 2.8600833   | 2.997714    | 2.8159394   | 2.830754    | 2.8417003   | 2.9596934   |
| "Clcn14"  | 3.5538106   | 3.0815449   | 2.7807624   | 2.950351    | 2.7809136   | 2.6539168   | 2.7813184   | 2.8206751   |
| "Clcn15"  | 2.7275949   | 2.866643    | 2.820807    | 2.716495    | 2.8310044   | 2.8428106   | 2.8129687   | 2.6852381   |
| "Clcn18"  | 2.4900312   | 2.5889199   | 2.555708    | 2.6541781   | 2.5570726   | 2.4812253   | 2.5540004   | 2.6386392   |
| "Clcn2"   | 5.8400707   | 2.4731696   | 2.4723973   | 2.5166616   | 2.4204178   | 2.3432508   | 2.4552755   | 2.5191982   |
| "Clcn23"  | 2.340369    | 2.3886204   | 2.366797    | 2.4491038   | 2.3552995   | 2.3112707   | 2.3476956   | 2.435848    |
| "Clcn25"  | 5.8478811   | 6.206030933 | 6.401786567 | 6.524534233 | 6.263915867 | 6.903852    | 6.3049066   | 6.570422367 |
| "Clcn3"   | 3.8327335   | 1.91428255  | 1.89866495  | 1.94730975  | 1.89023185  | 1.8702206   | 1.89421775  | 1.9335237   |
| "Clcn5"   | 6.564748    | 7.1070395   | 7.1985836   | 6.991351    | 6.978077    | 7.786982    | 6.8535194   | 7.2530932   |
| "Clcn7"   | 2.2643676   | 2.3763661   | 2.3168125   | 2.4395185   | 2.31506     | 2.2778726   | 2.3200517   | 2.4242687   |
| "Clec10a" | 5.033356    | 5.020731    | 7.416057    | 5.9045773   | 8.442514    | 9.273849    | 7.5956445   | 6.659822    |
| "Clec11a" | 2.1480515   | 1.9352479   | 5.9345965   | 3.4226677   | 2.5129404   | 2.0840213   | 2.1857557   | 2.867075    |
| "Clec14a" | 4.14539965  | 4.28575895  | 4.19524055  | 4.326391    | 4.3120505   | 4.31764135  | 4.0444574   | 4.67539455  |
| "Clec16a" | 5.607373    | 5.1873584   | 5.884056    | 5.8247967   | 5.113617    | 4.70988     | 6.048721    | 6.0154886   |
| "Clec1b"  | 5.9399767   | 2.3257098   | 2.2850685   | 2.3828053   | 2.2854085   | 3.0037627   | 2.2824671   | 2.366561    |
| "Clec2d"  | 8.025139    | 9.462875    | 9.278137    | 9.658825    | 9.453794    | 9.569393    | 10.032433   | 9.759155    |
| "Clec2g"  | 2.545064    | 2.6068432   | 2.5658126   | 2.6630528   | 2.5388317   | 2.4778304   | 2.5683818   | 2.6444786   |
| "Clec2h"  | 2.6431648   | 2.8580439   | 2.7860265   | 2.912889767 | 2.757454367 | 2.7115938   | 2.745921367 | 2.849381    |
| "Clec2i"  | 2.5410392   | 3.1248357   | 2.749779    | 2.883934    | 2.7705066   | 2.7971046   | 2.7299066   | 2.8602016   |
| "Clec3b"  | 3.8566082   | 3.0550632   | 5.724864    | 5.0205917   | 3.838893    | 3.827626    | 4.537755    | 4.6142035   |
| "Clec4a2" | 4.0405128   | 3.570058933 | 3.9356837   | 3.9750378   | 3.8293811   | 3.945510933 | 4.9528682   | 3.7313272   |
| "Clec4b1" | 3.0856078   | 3.3002067   | 3.2922578   | 3.4896684   | 3.2998252   | 3.0987983   | 3.4570146   | 3.348489    |
| "Clec4d"  | 5.440213    | 2.5730531   | 2.463792    | 2.6129818   | 2.5511491   | 5.1532626   | 2.786332    | 2.5755968   |
| "Clec4e"  | 2.43439555  | 2.3346629   | 2.2989733   | 2.39117685  | 2.2969371   | 2.2675091   | 2.2928137   | 2.3844507   |
| "Clec4f"  | 7.4185557   | 1.8620869   | 1.7911274   | 1.8483241   | 1.7855625   | 1.7401      | 1.7684515   | 1.8215      |
| "Clec4g"  | 7.498905    | 2.3379126   | 2.3016903   | 2.3909256   | 2.3025126   | 2.249245    | 2.2914846   | 2.368584    |
| "Clec4n"  | 4.5929318   | 2.59680275  | 2.54889095  | 2.57392005  | 2.4613007   | 3.71510755  | 3.56551575  | 2.6413362   |
| "Clec7a"  | 6.408886    | 3.097197    | 4.94101     | 3.464346    | 4.941233    | 5.44999     | 6.251885    | 4.942003    |
| "Clgn"    | 2.8147183   | 3.0887202   | 2.93052575  | 3.05399215  | 2.93293715  | 2.83608745  | 2.92923865  | 3.00519525  |
| "Clc1"    | 7.025325    | 4.721182    | 7.033744    | 5.7395997   | 5.861754    | 7.305157    | 7.098229    | 6.440692    |
| "Clc3"    | 2.571304    | 2.6403408   | 3.1150625   | 2.651147    | 2.5940561   | 2.5629807   | 2.6057396   | 2.6495245   |
| "Clc4"    | 8.707936333 | 7.4088492   | 7.950425433 | 7.296886133 | 8.352987133 | 8.562564533 | 8.558149    | 7.5454469   |
| "Clint1"  | 9.831018    | 10.381142   | 9.994901    | 9.854226    | 10.080584   | 10.539772   | 9.765113    | 9.940919    |
| "Clip1"   | 10.00609733 | 9.841191    | 9.032872667 | 9.294713933 | 9.5455561   | 9.836926333 | 9.056704833 | 9.386792333 |
| "Clip2"   | 2.3303676   | 2.3966763   | 2.356812    | 2.4317777   | 2.3535414   | 2.3108788   | 2.3509667   | 2.3986049   |
| "Clip4"   | 7.5766918   | 6.588464483 | 7.7448663   | 7.812913667 | 8.2837652   | 7.186535033 | 8.571605817 | 8.1341504   |
| "Clk1"    | 10.87088    | 11.887052   | 10.213192   | 10.025036   | 11.674362   | 12.033802   | 10.645889   | 10.559986   |
| "Clk2"    | 5.977707    | 6.5027804   | 5.807462    | 5.8152757   | 6.331855    | 6.970486    | 6.0244417   | 5.8920374   |

|           |             |             |             |             |             |             |             |             |
|-----------|-------------|-------------|-------------|-------------|-------------|-------------|-------------|-------------|
| "Clk3"    | 8.254654    | 8.381708    | 7.9913797   | 7.691881    | 8.1912775   | 8.157847    | 7.851378    | 7.5434055   |
| "Clk4"    | 8.79536575  | 9.338829    | 7.6985483   | 8.0024937   | 8.8877555   | 9.259871    | 8.0281153   | 8.294142    |
| "Clmn"    | 2.5568142   | 2.4722207   | 2.4596024   | 2.4896755   | 2.6524336   | 3.2521992   | 2.4273722   | 2.5167232   |
| "Cln3"    | 2.132779    | 2.1592705   | 2.6146724   | 2.2095654   | 2.1633694   | 2.1769288   | 2.173756    | 2.210693    |
| "Cln5"    | 7.7532406   | 6.9117007   | 7.623195    | 7.5262523   | 7.1870217   | 7.299874    | 7.6532216   | 7.473907    |
| "Cln6"    | 3.7571158   | 3.9300117   | 3.880875    | 4.0100665   | 3.891381    | 3.8646436   | 3.8908434   | 3.9618332   |
| "Cln8"    | 5.724306933 | 4.7246232   | 5.0122973   | 5.367256167 | 4.915418667 | 4.175843833 | 5.0637632   | 5.2698055   |
| "Clns1a"  | 9.069792333 | 9.058144333 | 9.208579333 | 9.254490667 | 8.856248667 | 8.817246233 | 9.411712667 | 9.130966667 |
| "Clock"   | 7.922177    | 7.95558675  | 7.5177618   | 7.3888005   | 7.2262423   | 7.7204798   | 7.2466375   | 7.2564513   |
| "Clp1"    | 4.541982    | 4.56858     | 4.6024303   | 4.5854135   | 4.474192    | 5.1879406   | 5.0188007   | 4.410853    |
| "Clpb"    | 4.91926285  | 4.83031595  | 5.001335    | 5.12024835  | 5.03640035  | 4.93921625  | 5.22271925  | 5.0577931   |
| "Clpp"    | 8.696141    | 8.631448    | 8.6495365   | 8.7414075   | 8.852234    | 9.0650355   | 9.0599475   | 8.6645275   |
| "Clps"    | 3.9673721   | 2.51050725  | 2.4643787   | 2.5642551   | 2.46406175  | 2.41233145  | 2.45604145  | 2.5740428   |
| "Clptm1"  | 6.050925    | 6.106405    | 5.5480614   | 5.48225     | 5.507826    | 5.47075     | 5.6681232   | 5.121862    |
| "Clptm11" | 9.150142    | 9.095535    | 9.659444    | 9.314194    | 9.268417    | 9.508102    | 9.641092    | 9.361303    |
| "Clpx"    | 10.436533   | 11.333031   | 9.400272    | 9.741203    | 10.630141   | 10.814489   | 9.163898    | 10.00182    |
| "Clstn1"  | 4.0993398   | 4.27193105  | 4.38017435  | 4.30791415  | 4.671573    | 4.0876947   | 4.25831055  | 4.4153732   |
| "Clta"    | 0.7957783   | 0.9461087   | 0.9438061   | 9.2146975   | 9.8148865   | 9.977205    | 9.40768125  | 9.391114    |
| "Cltb"    | 8.4167048   | 8.75661275  | 8.39397515  | 8.627822    | 8.32328     | 8.870069    | 8.72346225  | 8.356357    |
| "Cltc"    | 10.751954   | 10.720531   | 11.007664   | 10.813236   | 10.802826   | 11.188036   | 11.072049   | 10.788254   |
| "Clu"     | 11.49516725 | 8.69831525  | 9.5429095   | 8.984466875 | 9.7442375   | 10.58561075 | 9.8914975   | 9.38986215  |
| "Cluap1"  | 6.970545    | 7.5888495   | 6.8172398   | 6.8846755   | 6.595314    | 6.931965    | 6.934002    | 6.969699    |
| "Clvs1"   | 2.6351013   | 2.8056405   | 2.6930077   | 2.8350918   | 2.759943    | 2.7053244   | 2.725007    | 2.8539581   |
| "Clybl"   | 7.9867654   | 8.199734    | 8.493718    | 8.883461    | 8.517501    | 8.009771    | 8.52096     | 8.600232    |
| "Cma1"    | 2.057914    | 1.9592419   | 5.7879663   | 3.8847814   | 5.560052    | 5.23067     | 4.6154737   | 3.9301353   |
| "Cma2"    | 2.9521892   | 3.2718232   | 3.0760648   | 3.2316222   | 3.0824702   | 2.9943264   | 3.0633898   | 3.1948447   |
| "Cmah"    | 2.363784    | 2.3748739   | 2.3605938   | 2.4296734   | 2.337767    | 3.04458     | 2.3265154   | 2.4346435   |
| "Cmas"    | 8.380446    | 8.270992    | 8.589107    | 8.8420315   | 8.092994    | 8.355894    | 8.712372    | 8.732241    |
| "Cmb1"    | 10.128347   | 10.858412   | 10.941389   | 10.9900465  | 10.303816   | 10.354744   | 10.304264   | 10.4263115  |
| "Cml1"    | 4.9941406   | 3.0205674   | 3.015142    | 3.0709298   | 3.012424    | 2.942972    | 3.0260384   | 3.0694501   |
| "Cml2"    | 4.5606216   | 2.130421    | 2.2750245   | 2.17872     | 2.09879315  | 2.0657714   | 2.0940947   | 2.17820835  |
| "Cml5"    | 2.4221675   | 2.4954998   | 2.4782307   | 2.5953448   | 2.4812112   | 2.4015243   | 2.4769294   | 2.5439181   |
| "Cmpk1"   | 9.243756    | 8.67482     | 9.422306    | 9.005462    | 9.480717    | 9.680942    | 9.57696     | 9.294954    |
| "Cmpk2"   | 2.807708    | 2.87785075  | 2.9024981   | 2.9755186   | 2.89104995  | 2.7775891   | 3.38052825  | 3.10038945  |
| "Cmtm1"   | 2.5748053   | 2.709375    | 2.6548004   | 2.7493954   | 2.6560154   | 2.5877116   | 2.631612    | 2.7587106   |
| "Cmtm2a"  | 3.085763    | 3.326317    | 3.2516754   | 3.3920276   | 3.251629    | 3.1806223   | 3.244968    | 3.351875    |
| "Cmtm3"   | 6.2005744   | 4.679415    | 7.3759103   | 6.628772    | 6.582421    | 7.04215     | 7.0066104   | 6.6103806   |
| "Cmtm6"   | 6.30563215  | 5.07989925  | 6.39968945  | 6.0355575   | 6.5023005   | 6.74581165  | 6.44254435  | 6.19496615  |
| "Cmtm7"   | 4.54637055  | 4.0276981   | 4.42297785  | 4.23486475  | 4.18582325  | 4.7680856   | 4.7765019   | 4.20676805  |
| "Cmtm8"   | 3.4916124   | 2.4635162   | 2.5657523   | 2.618102    | 2.5639083   | 2.5451167   | 2.561679    | 2.6142068   |
| "Cmya5"   | 12.999908   | 13.752351   | 13.584911   | 13.733327   | 13.336693   | 13.32873    | 13.35137    | 13.723086   |
| "Cnbp"    | 12.4142235  | 12.931883   | 12.7159775  | 13.0988845  | 12.650613   | 12.603429   | 12.629278   | 13.0693675  |
| "Cndp2"   | 7.4179652   | 7.32358215  | 7.345912    | 7.0503432   | 7.57680385  | 7.694052    | 7.5048012   | 7.03864085  |
| "Cnga1"   | 2.3296502   | 2.3946352   | 2.3726864   | 2.438989    | 2.5556018   | 2.3121176   | 2.346194    | 2.4344847   |
| "Cngb1"   | 2.6175992   | 2.819693    | 2.671854    | 2.733855    | 2.6829805   | 2.669838    | 2.6270907   | 2.752663    |
| "Cngb3"   | 2.8830006   | 3.1089847   | 2.9860904   | 3.1165867   | 2.996063    | 2.9322832   | 2.979791    | 3.078218    |
| "Cnih"    | 10.340533   | 10.490789   | 10.900611   | 10.734543   | 10.38705    | 10.194501   | 10.743449   | 10.729494   |
| "Cnih2"   | 2.3386462   | 2.4059777   | 2.3782635   | 2.4415169   | 2.3717384   | 2.3522968   | 2.4519618   | 2.436613    |
| "Cnih4"   | 9.263123    | 9.141392    | 9.348484    | 9.464592    | 9.155004    | 9.016742    | 9.849902    | 9.526648    |
| "Cnn1"    | 2.6117487   | 2.4468203   | 2.69658     | 3.0966566   | 2.6294122   | 2.6028147   | 2.824138    | 2.4732065   |
| "Cnn2"    | 5.668667    | 4.1815147   | 6.881808    | 6.0917253   | 5.4472065   | 7.1284304   | 6.157196    | 5.92839     |
| "Cnn3"    | 8.597068917 | 8.179543333 | 8.543574083 | 8.177251333 | 8.398061733 | 8.379936333 | 8.2761494   | 8.321640883 |
| "Cnnm2"   | 3.1373172   | 2.4741447   | 2.4799008   | 2.5202727   | 3.5883548   | 3.6226916   | 3.154192    | 2.306875    |
| "Cnnm3"   | 3.634155675 | 4.2288622   | 3.22377635  | 3.040005875 | 3.5918674   | 3.56738505  | 3.093272575 | 3.357783825 |
| "Cno"     | 5.740327    | 6.2624836   | 5.5199323   | 5.428521    | 5.9981494   | 6.000628    | 5.505038    | 5.5522957   |
| "Cnot1"   | 8.799636    | 9.061265    | 8.498609    | 8.659882    | 8.928112    | 9.159075    | 8.684198    | 8.708335    |
| "Cnot2"   | 8.197549125 | 8.733743875 | 8.483998625 | 8.380749425 | 8.2326855   | 8.521582125 | 8.32188975  | 8.324836625 |
| "Cnot3"   | 1.7003874   | 2.251895    | 2.1392622   | 2.181344    | 2.519621    | 2.1398335   | 2.1497889   | 2.1698248   |
| "Cnot4"   | 7.34021716  | 8.16880338  | 7.53659484  | 7.7626255   | 7.84777216  | 8.0808218   | 7.5644814   | 7.9136112   |
| "Cnot6"   | 5.725280175 | 5.808672525 | 6.000131325 | 5.8356103   | 5.9920538   | 6.187426575 | 6.013835825 | 5.86546325  |
| "Cnot6l"  | 5.933499375 | 5.10218165  | 4.99384785  | 5.02310025  | 5.565579925 | 5.8953173   | 4.93151115  | 5.050828575 |
| "Cnot7"   | 6.8177999   | 7.0601118   | 6.765294533 | 7.390264233 | 6.7510913   | 7.205633    | 6.488912    | 7.086968633 |
| "Cnot8"   | 7.424904    | 7.7640627   | 7.8321618   | 8.0143925   | 7.5128474   | 7.3050035   | 8.0212855   | 7.92174915  |
| "Cnp"     | 5.320355    | 5.212142667 | 5.219960433 | 5.104089633 | 5.503931933 | 5.46327     | 5.343199333 | 5.1272475   |
| "Cnpy2"   | 7.478518    | 7.414457833 | 7.538064567 | 7.753620733 | 7.5009305   | 7.372914333 | 7.756012667 | 7.5261132   |
| "Cnpy3"   | 3.8828936   | 3.759611    | 4.318461    | 3.8385437   | 4.0610175   | 3.7349005   | 3.9293063   | 3.8234174   |
| "Cnr2"    | 2.546682    | 2.6496005   | 2.6027694   | 2.7672043   | 2.6165366   | 3.2975821   | 2.5976386   | 2.7481003   |
| "Cntd1"   | 6.4950793   | 6.9164717   | 6.85406725  | 6.843203    | 6.51913375  | 6.7214212   | 6.78560785  | 6.8960869   |
| "Cntf"    | 6.9351373   | 6.5006585   | 6.0377407   | 5.3306775   | 8.197969    | 6.4754944   | 7.045467    | 6.5607843   |
| "Cntfr"   | 3.108536    | 3.18043365  | 3.47989305  | 3.4322754   | 3.14355465  | 3.1115383   | 3.2018895   | 3.3154111   |
| "Cntln"   | 2.6580303   | 2.6087372   | 3.631867    | 2.662328    | 3.5930004   | 2.6485293   | 2.7414632   | 2.6421058   |
| "Cntn1"   | 2.361708    | 2.470302    | 2.4098806   | 2.5058      | 2.4077928   | 2.3524008   | 2.400624    | 2.493061    |
| "Cntn3"   | 2.7918744   | 2.8428006   | 2.8128457   | 2.9340525   | 2.817058    | 2.8286395   | 2.8332143   | 2.9317992   |
| "Cntn4"   | 2.6018066   | 2.7279155   | 2.6685965   | 2.7886255   | 2.672166    | 2.6376197   | 2.6675994   | 2.7851202   |
| "Cntn6"   | 2.4779434   | 2.5917776   | 2.5406373   | 2.658       | 2.537073    | 2.4995809   | 2.529386    | 2.6266298   |
| "Cntnap1" | 2.2698889   | 2.331284    | 2.3060572   | 2.4485135   | 2.3150594   | 2.2557783   | 2.3045588   | 2.3855      |
| "Cntnap2" | 3.0133055   | 3.73502615  | 5.13727785  | 4.739356    | 2.7677392   | 2.719998    | 4.2223153   | 4.46251485  |
| "Cntrob"  | 3.4247675   | 3.7233315   | 4.035735    | 4.103266    | 3.8205402   | 3.9650838   | 4.098953    | 3.8158245   |
| "Coasy"   | 7.0113955   | 6.612894    | 5.2995605   | 5.4110503   | 6.4864645   | 7.329674    | 6.8878627   | 5.2963133   |
| "Cobra1"  | 7.1850843   | 7.5331845   | 7.584975    | 7.5263042   | 7.5429134   | 7.9110465   | 7.7346954   | 7.563711    |
| "Coch"    | 2.473325    | 2.5875309   | 2.5649667   | 2.6333413   | 2.5440192   | 2.5632305   | 2.5671537   | 2.6233006   |

|            |             |             |             |             |             |             |             |             |
|------------|-------------|-------------|-------------|-------------|-------------|-------------|-------------|-------------|
| "Cog1"     | 5.78691458  | 6.05735278  | 5.64954206  | 5.9907815   | 5.74412454  | 5.74024714  | 5.80292702  | 5.98881432  |
| "Cog2"     | 5.721477    | 6.2699103   | 5.8856893   | 5.908494    | 6.3654857   | 5.941257    | 5.893737    | 5.799273    |
| "Cog4"     | 6.5326088   | 6.806174767 | 6.5985049   | 6.682320267 | 6.745112133 | 6.603803333 | 6.768667    | 6.881336667 |
| "Cog6"     | 8.47232     | 9.765896    | 9.154947    | 9.384752    | 9.085272    | 9.477974    | 8.218529    | 9.381203    |
| "Cog8"     | 7.02487165  | 7.143369    | 6.9826257   | 7.1848979   | 7.159875    | 7.0940385   | 6.8113945   | 7.1127137   |
| "Coil"     | 5.302676    | 5.423238    | 5.414091    | 5.4673553   | 5.099518    | 5.3604627   | 5.661191    | 5.676411    |
| "Col11a1"  | 2.60021335  | 2.7350545   | 6.9947445   | 5.2612432   | 2.6450703   | 2.819583    | 2.4781497   | 5.801592    |
| "Col11a2"  | 2.001383    | 2.2407649   | 4.344415    | 2.1672823   | 2.0715878   | 2.0352113   | 2.049169    | 2.2361474   |
| "Col12a1"  | 3.0198474   | 3.2771728   | 3.4870663   | 3.259046    | 3.0643947   | 3.0238142   | 2.8806534   | 3.3813343   |
| "Col13a1"  | 2.8591044   | 2.9770722   | 3.4899287   | 2.89349     | 2.8836691   | 2.8518193   | 2.730787    | 2.930165    |
| "Col14a1"  | 5.34145595  | 2.7730291   | 7.08419535  | 4.94877295  | 6.20072325  | 4.4946933   | 5.884749    | 5.19898135  |
| "Col15a1"  | 2.1763191   | 2.2316391   | 3.2306612   | 2.5441833   | 2.2446961   | 2.2138004   | 2.2424705   | 2.3059802   |
| "Col16a1"  | 5.156614    | 5.592734    | 6.800573    | 5.640531    | 5.6385074   | 5.2412405   | 5.565234    | 5.6399555   |
| "Col17a1"  | 2.8399916   | 2.559805    | 5.5483813   | 2.6232777   | 2.5166006   | 2.472781    | 2.5724242   | 2.6032245   |
| "Col18a1"  | 5.350394    | 2.7008023   | 3.33118435  | 2.76102965  | 2.84864295  | 2.47864665  | 2.70180595  | 2.98757755  |
| "Col19a1"  | 3.1932797   | 3.5442475   | 2.4396945   | 2.61113905  | 2.15128235  | 2.5584832   | 2.77331165  | 2.51380255  |
| "Col1a1"   | 5.7269295   | 4.56391025  | 11.016381   | 8.5815847   | 7.275136    | 6.87867     | 6.7127597   | 9.170801    |
| "Col1a2"   | 9.916441    | 7.7128563   | 14.0561405  | 12.087001   | 11.249618   | 10.877014   | 10.714804   | 12.556675   |
| "Col20a1"  | 3.55234745  | 3.57530965  | 3.56218655  | 3.60017145  | 3.582377    | 3.51505825  | 3.4896842   | 3.799753    |
| "Col22a1"  | 4.0913739   | 5.36230175  | 7.2151925   | 6.65674615  | 4.60747275  | 4.87856675  | 4.12665115  | 7.34660785  |
| "Col2a1"   | 2.2474983   | 2.2901392   | 2.7291846   | 2.3815596   | 2.2645497   | 2.2081726   | 2.2561142   | 3.2930994   |
| "Col3a1"   | 9.5291833   | 5.680071    | 12.269463   | 10.240358   | 10.6053775  | 8.430978    | 10.587092   | 10.17649125 |
| "Col4a1"   | 9.36787415  | 8.39011185  | 9.28836065  | 8.63712135  | 9.8508815   | 9.743915    | 9.1543525   | 8.9249275   |
| "Col4a2"   | 8.659107    | 8.180256    | 9.037964    | 8.339856    | 9.455658    | 9.226458    | 8.737762    | 8.599965    |
| "Col4a3"   | 2.064612    | 2.1281693   | 2.109989    | 2.1888678   | 2.4224398   | 2.0933313   | 2.1113837   | 2.1781697   |
| "Col4a3bp" | 5.136221167 | 5.5515348   | 5.300343767 | 5.4131277   | 5.635894867 | 5.4203742   | 5.518863233 | 5.3582537   |
| "Col4a4"   | 2.9123626   | 3.1014917   | 3.0219002   | 3.215965    | 3.0443351   | 2.9682045   | 3.0097144   | 3.1670926   |
| "Col4a5"   | 3.4317738   | 3.0843133   | 4.38281345  | 3.6847262   | 4.4931839   | 3.9251835   | 3.5094244   | 3.9929029   |
| "Col4a6"   | 2.26114375  | 2.33107545  | 2.3587234   | 2.355713    | 2.456308    | 2.2111101   | 2.28143635  | 2.3298543   |
| "Col5a1"   | 5.1117971   | 4.258409833 | 7.1050283   | 5.784308    | 6.067788833 | 5.311977    | 5.847009867 | 5.622385667 |
| "Col5a2"   | 7.59174425  | 5.59420035  | 9.531332    | 7.6552728   | 8.31987025  | 7.424108    | 7.80908     | 7.994694    |
| "Col5a3"   | 4.8128343   | 3.674868    | 6.9607906   | 5.4695687   | 6.2420664   | 5.0839834   | 6.2821383   | 5.4732394   |
| "Col6a1"   | 7.380486    | 5.1184216   | 9.495469    | 8.314094    | 7.966276    | 6.6921167   | 8.282197    | 8.259399    |
| "Col6a2"   | 5.38127475  | 3.1071126   | 8.0669535   | 6.04720045  | 5.80830935  | 4.1509995   | 6.3785683   | 6.28721165  |
| "Col6a3"   | 8.458721    | 5.1873255   | 10.9909     | 9.34054     | 9.176706    | 7.410173    | 9.806578    | 9.409105    |
| "Col7a1"   | 5.222972    | 5.823504    | 5.356248    | 5.152602    | 4.633334    | 4.3835707   | 5.36388     | 4.4706      |
| "Col8a1"   | 4.330676    | 3.3623977   | 5.831993    | 4.850164    | 4.885496    | 4.3163266   | 4.764645    | 5.652313    |
| "Col9a1"   | 2.63637995  | 3.26427125  | 4.1267039   | 4.4386625   | 2.72707105  | 2.86637335  | 2.84760405  | 3.04594435  |
| "Col9a2"   | 2.8002043   | 2.955938    | 2.9426284   | 3.0569263   | 2.9458547   | 2.9017203   | 2.9453385   | 3.0374923   |
| "Col9a3"   | 3.026659    | 3.2860445   | 3.1418384   | 3.3383705   | 3.16197895  | 3.064203    | 3.1357379   | 3.26752105  |
| "Collec12" | 4.323123    | 3.1517313   | 4.5750985   | 4.533752    | 4.331829    | 4.2350097   | 4.334798    | 4.5299993   |
| "Colq"     | 2.4251876   | 2.4714892   | 2.4253838   | 2.5274851   | 2.475079    | 2.4079268   | 2.4250727   | 2.490922    |
| "Commnd1"  | 9.4610725   | 9.66307725  | 10.1685685  | 10.21002425 | 9.66047225  | 9.109724    | 9.794046    | 10.1150095  |
| "Commnd2"  | 7.6018066   | 8.154512    | 7.6491404   | 7.7077937   | 7.611946    | 7.5876346   | 7.9174905   | 7.585596    |
| "Commnd4"  | 7.696645    | 8.044614    | 7.740636    | 7.6515837   | 7.5768166   | 7.4701285   | 8.059411    | 7.4930735   |
| "Commnd5"  | 5.3466675   | 5.5784207   | 6.1202222   | 6.025829    | 6.04102445  | 5.134022    | 6.42908435  | 5.99269725  |
| "Commnd6"  | 7.421919    | 7.1053743   | 6.534291    | 7.022473    | 7.288914    | 7.405163    | 7.829035    | 7.0406156   |
| "Commnd7"  | 6.656208    | 6.327724    | 7.266637    | 6.830904    | 6.571395    | 6.3463264   | 7.036504    | 6.984507    |
| "Commnd9"  | 7.114848433 | 7.670396333 | 7.6123839   | 7.7087242   | 7.467727    | 7.492413867 | 7.3178978   | 7.6602981   |
| "Comp"     | 6.5024824   | 5.7892375   | 9.322012    | 8.062893    | 4.64059     | 6.0639176   | 4.8205433   | 8.358481    |
| "Comt"     | 8.718385    | 7.6440815   | 7.64686135  | 7.32390615  | 8.0838565   | 7.4933033   | 7.7807228   | 7.2731475   |
| "Comtd1"   | 5.49748     | 6.529848    | 6.03037     | 6.192432    | 5.570266    | 6.030605    | 6.67542     | 5.801464    |
| "Copa"     | 9.065553    | 9.208841    | 9.363253    | 9.077757    | 9.024933    | 9.198214    | 9.340597    | 9.113153    |
| "Copb1"    | 7.992791    | 7.932634    | 8.193356    | 7.7071333   | 7.9684114   | 8.430448    | 7.957322    | 7.781799    |
| "Copb2"    | 8.767929    | 9.060132    | 8.9970755   | 9.017711    | 8.822684    | 8.959026    | 8.879834    | 8.9449935   |
| "Cope"     | 9.58581     | 9.774698    | 10.183672   | 10.049627   | 9.677364    | 9.672733    | 9.930657    | 9.837782    |
| "Cpg"      | 6.217438    | 6.04044365  | 6.36643985  | 6.42019845  | 6.1869365   | 6.0226996   | 6.49224625  | 6.1623415   |
| "Cpgp2"    | 5.377992    | 4.8932757   | 5.9833775   | 6.363523    | 5.753708    | 5.1786647   | 6.273052    | 6.4457355   |
| "Cpgp2as2" | 3.6154088   | 4.10654634  | 3.84663562  | 3.86259852  | 3.98558222  | 3.87033498  | 3.64857656  | 3.91052064  |
| "Cops2"    | 8.8049792   | 9.3476395   | 8.959308    | 9.10223125  | 9.1270775   | 9.3292585   | 8.867276    | 9.129605    |
| "Cops3"    | 11.255913   | 11.489719   | 11.484464   | 11.425349   | 11.065563   | 10.939938   | 11.74612    | 11.498619   |
| "Cops4"    | 9.949625    | 10.12177    | 10.120465   | 10.384196   | 9.955827    | 9.613558    | 10.622815   | 10.143042   |
| "Cops5"    | 7.1215596   | 7.7512716   | 7.4348506   | 7.55367615  | 7.274181    | 7.366658    | 7.48478185  | 7.45080725  |
| "Cops6"    | 7.51009475  | 8.11201965  | 8.00604165  | 7.94539865  | 7.6574825   | 7.383368    | 7.9973519   | 7.656159    |
| "Cops7a"   | 8.02120535  | 8.5501035   | 8.72963775  | 8.735226    | 7.8678002   | 7.8274025   | 8.55467185  | 8.5554853   |
| "Cops7b"   | 4.86268685  | 5.2033702   | 5.3944912   | 5.53092525  | 5.00920385  | 5.040322    | 5.43235635  | 5.7180901   |
| "Cops8"    | 9.238373    | 9.627616    | 9.475965    | 9.551592    | 9.135874    | 9.257325    | 9.458577    | 9.404017    |
| "Cpz1"     | 7.7774925   | 7.668996    | 7.518626    | 7.4134417   | 7.420596    | 7.6006403   | 7.691337    | 7.3942604   |
| "Cpz2"     | 7.482861    | 7.0342307   | 7.6103706   | 7.393021    | 6.8886204   | 6.4218183   | 8.002993    | 7.291762    |
| "Coq10a"   | 9.868197    | 9.768027    | 10.287257   | 10.767092   | 10.29738    | 9.6828785   | 9.974391    | 10.843725   |
| "Coq3"     | 5.5426077   | 5.8101672   | 5.780605    | 6.08828815  | 6.1884955   | 5.8961015   | 5.9000647   | 6.1416085   |
| "Coq4"     | 4.55092     | 4.101919    | 4.1675873   | 4.813905    | 4.442764    | 4.0437613   | 4.9425454   | 4.7081704   |
| "Coq5"     | 7.81978825  | 7.99449445  | 8.0818794   | 8.49700915  | 8.1873073   | 7.904965    | 8.188304    | 8.4779813   |
| "Coq6"     | 7.0484867   | 7.4389515   | 7.338457    | 7.7095184   | 7.5002313   | 7.4162064   | 7.3566694   | 7.807851    |
| "Coq7"     | 10.171327   | 9.813828    | 10.613929   | 11.027137   | 10.49583    | 9.532433    | 10.264102   | 10.914868   |
| "Coq9"     | 12.130473   | 12.348696   | 12.283745   | 12.540325   | 12.343742   | 12.126801   | 12.026778   | 12.220859   |
| "Coro1a"   | 4.0189247   | 3.728358933 | 4.144847    | 4.047023567 | 4.005753667 | 6.707558567 | 4.446909867 | 4.030448467 |
| "Coro1b"   | 5.4738054   | 5.0700407   | 5.6567936   | 4.9515224   | 6.6258593   | 7.2021093   | 6.59176     | 5.1644335   |
| "Coro1c"   | 5.905792    | 5.472297    | 6.224274    | 5.722793    | 5.923898    | 6.062824    | 5.9028263   | 5.7396784   |
| "Coro2a"   | 3.8499434   | 4.2416873   | 4.0102873   | 4.175477    | 4.014163    | 4.056153    | 4.023436    | 4.1285577   |
| "Coro2b"   | 2.16580635  | 2.19459105  | 2.2042607   | 2.23315915  | 2.728615    | 2.89631545  | 2.1476102   | 2.2909594   |

|           |             |             |             |             |             |             |             |             |
|-----------|-------------|-------------|-------------|-------------|-------------|-------------|-------------|-------------|
| "Coro6"   | 5.37788015  | 5.4957328   | 5.01817145  | 5.5803108   | 5.4831571   | 5.045296    | 5.1756548   | 5.54795365  |
| "Cott1"   | 6.1378379   | 5.45552286  | 6.19590612  | 5.7342865   | 5.9463666   | 6.44996866  | 6.14187388  | 5.80192536  |
| "Cox15"   | 6.946676133 | 7.214096133 | 7.525116333 | 7.857585767 | 7.1937351   | 6.710098567 | 7.4945219   | 7.882939167 |
| "Cox16"   | 9.807232    | 9.997475    | 9.887842    | 9.886438    | 9.6197195   | 9.411713    | 10.038921   | 9.799971    |
| "Cox17"   | 12.084103   | 11.803807   | 12.20136    | 12.323029   | 12.046492   | 11.67336    | 12.564011   | 12.176983   |
| "Cox18"   | 7.374975    | 7.4185467   | 7.389542    | 7.507433    | 7.5266247   | 7.2917557   | 7.6899915   | 7.722742    |
| "Cox19"   | 8.86046     | 8.768612    | 8.628277    | 8.596342    | 8.951269    | 8.61515     | 9.2381935   | 8.441984    |
| "Cox4i1"  | 14.144552   | 14.1063595  | 14.236209   | 14.381162   | 14.365774   | 14.229998   | 14.168498   | 14.311356   |
| "Cox4nb"  | 6.926089    | 6.7482634   | 6.802428    | 6.5499744   | 6.8488264   | 6.8976045   | 7.5095673   | 6.6166344   |
| "Cox5a"   | 13.829125   | 13.66792983 | 14.002544   | 14.28049433 | 13.94435    | 13.780737   | 13.918868   | 14.22577133 |
| "Cox5b"   | 9.90728625  | 9.925400583 | 10.06894242 | 10.1284756  | 10.06128333 | 9.917762583 | 9.956000733 | 10.07851212 |
| "Cox6a1"  | 11.711753   | 10.574016   | 11.138639   | 10.39856    | 11.9748425  | 11.75729075 | 12.175832   | 10.6346735  |
| "Cox6a2"  | 13.65273    | 14.006973   | 13.94123    | 13.762445   | 13.759407   | 13.443052   | 13.755874   | 13.77731    |
| "Cox6b1"  | 13.28849525 | 13.225813   | 13.3413465  | 13.4238395  | 13.398919   | 13.264383   | 13.3026595  | 13.3928135  |
| "Cox6b2"  | 2.3276205   | 2.3804932   | 2.351297    | 2.4298966   | 2.3518577   | 2.3227353   | 2.350782    | 2.460978    |
| "Cox6c"   | 12.827445   | 12.82412025 | 13.160828   | 13.3221065  | 13.0693605  | 12.816244   | 12.9341735  | 13.3923465  |
| "Cox7a1"  | 12.319855   | 12.379888   | 12.834272   | 13.299275   | 13.013385   | 12.737859   | 12.252236   | 13.191048   |
| "Cox7a2"  | 13.268033   | 13.3326565  | 13.4872065  | 13.71622    | 13.370068   | 13.0103985  | 13.408644   | 13.60015    |
| "Cox7a2i" | 10.43102967 | 10.31924233 | 10.473779   | 10.53159933 | 10.45049933 | 10.48406533 | 10.37814167 | 10.48587067 |
| "Cox7c"   | 7.068581567 | 6.532279    | 6.702743167 | 6.669405833 | 6.903709367 | 6.915199167 | 6.689746167 | 6.764132867 |
| "Cox8a"   | 8.833838    | 8.12169085  | 8.0201853   | 7.72955935  | 8.9543825   | 8.7865625   | 9.36356625  | 7.88331185  |
| "Cox8b"   | 13.612377   | 13.876752   | 13.889667   | 14.076998   | 13.835835   | 13.512026   | 13.872268   | 14.0414295  |
| "Cp"      | 9.455689829 | 4.676709014 | 5.428628443 | 4.759592257 | 5.912375143 | 6.232470643 | 5.9958335   | 5.2219426   |
| "Cpa1"    | 2.6559114   | 2.220428    | 2.1938255   | 2.260627    | 2.200836    | 2.156675    | 2.193431    | 2.2470887   |
| "Cpa3"    | 2.595842    | 2.4545383   | 6.6682606   | 4.749556    | 6.129967    | 5.944948    | 5.9538145   | 4.317978    |
| "Cpb1"    | 3.2836297   | 2.2858386   | 2.255363    | 2.3295949   | 2.2543457   | 2.2323217   | 2.251841    | 2.3248227   |
| "Cpb2"    | 10.773221   | 2.7951536   | 4.115201    | 2.7964118   | 2.9802918   | 2.6234863   | 2.6651094   | 2.8440464   |
| "Cpd"     | 6.1613381   | 6.606956    | 6.54461338  | 6.657869    | 6.7776936   | 6.2953027   | 6.74161596  | 6.52161006  |
| "Cpe"     | 11.270943   | 11.112973   | 11.847192   | 11.85848    | 11.498085   | 10.713927   | 11.653755   | 11.854427   |
| "Cpeb1"   | 7.2127323   | 8.464714    | 8.292627    | 8.931184    | 7.877348    | 8.07044     | 7.8716555   | 8.477456    |
| "Cpeb2"   | 7.6400995   | 7.758774    | 7.5765586   | 8.542812    | 7.784905    | 7.7978387   | 7.7996216   | 8.3405695   |
| "Cpeb3"   | 8.318768133 | 8.495853667 | 9.329429833 | 9.834782667 | 8.494985    | 7.614841833 | 9.324594    | 9.560305333 |
| "Cpeb4"   | 10.0782555  | 9.6470585   | 10.161593   | 10.7068135  | 10.009602   | 9.799087    | 10.129468   | 10.9282865  |
| "Cphx"    | 2.75026435  | 2.923440125 | 2.836278475 | 2.941269225 | 2.812532325 | 2.7949339   | 2.823262025 | 3.01264405  |
| "Cplx1"   | 2.656738233 | 2.9583011   | 2.682225467 | 2.7478382   | 2.7039592   | 2.871903933 | 2.679902767 | 2.725507767 |
| "Cpn1"    | 7.1388435   | 2.5837297   | 2.5735667   | 2.6242273   | 2.570476    | 2.558243    | 2.5677004   | 2.6289215   |
| "Cpn2"    | 8.429035    | 2.6767335   | 2.7049756   | 2.7314985   | 2.687595    | 2.6087823   | 2.626326    | 2.7319992   |
| "Cpne1"   | 7.2348123   | 7.9730797   | 7.712241    | 7.4523087   | 8.199299    | 8.49251     | 7.777085    | 7.7935824   |
| "Cpne2"   | 7.6817555   | 6.5946574   | 6.8697815   | 5.388035    | 5.4208455   | 5.245531    | 8.524973    | 5.7792563   |
| "Cpne3"   | 7.725953    | 7.8432198   | 8.064856    | 7.970792    | 8.112459    | 8.102327    | 8.198607    | 8.177125    |
| "Cpox"    | 5.2244535   | 5.313738    | 5.695047    | 5.67609135  | 5.47163     | 5.174814    | 5.31413935  | 6.0023265   |
| "Cpped1"  | 7.740325    | 8.218025    | 8.431372    | 9.208881    | 8.011904    | 7.2752624   | 8.449541    | 9.020651    |
| "Cps1"    | 12.647393   | 1.9845172   | 3.8015046   | 2.0269926   | 2.957277    | 1.9519948   | 1.8997972   | 2.326675    |
| "Cpsf1"   | 7.4539914   | 7.8361826   | 7.3079534   | 7.3263135   | 7.5914106   | 8.103705    | 7.4368434   | 7.251049    |
| "Cpsf2"   | 5.26692225  | 5.6270287   | 5.62090205  | 5.65759575  | 5.5089023   | 5.4662918   | 5.6756958   | 5.7587081   |
| "Cpsf3"   | 6.9222466   | 6.960497933 | 7.012788333 | 6.9841895   | 7.021250733 | 6.9253634   | 7.081271167 | 6.992124833 |
| "Cpsf3i"  | 6.6303673   | 6.5918617   | 6.6288194   | 6.653899    | 6.4412737   | 6.356329    | 6.9734626   | 6.8027525   |
| "Cpsf4"   | 6.0119596   | 6.1131825   | 6.0348806   | 6.019571    | 6.203353    | 6.5458965   | 6.114184    | 6.0461154   |
| "Cpsf4i"  | 2.6167943   | 2.6970086   | 2.6881843   | 2.831306    | 2.6885858   | 2.6653638   | 2.6769698   | 2.766835    |
| "Cpsf7"   | 8.77405     | 9.13403     | 8.541652    | 8.404936    | 9.092223    | 9.328887    | 8.683609    | 8.63646     |
| "Cpt1a"   | 6.939438    | 4.8222991   | 5.322555433 | 5.170440667 | 5.188697067 | 5.332457267 | 4.707456633 | 5.376369233 |
| "Cpt2"    | 6.29517715  | 6.04714325  | 6.29851     | 6.467276    | 6.6673295   | 6.465757    | 6.54788425  | 6.47618875  |
| "Cpxm1"   | 2.8675327   | 3.1556098   | 4.1180496   | 3.0478106   | 3.12048     | 3.0925865   | 3.1283488   | 3.1932795   |
| "Cpxm2"   | 4.55789015  | 4.4531399   | 6.5209843   | 6.29042     | 4.5870639   | 4.63439735  | 4.7004817   | 6.697691    |
| "Cpz"     | 2.375613    | 2.440182    | 2.4356868   | 2.4935083   | 2.4281266   | 2.4178917   | 2.4220243   | 2.4849145   |
| "Cr1i"    | 8.3817425   | 8.26001     | 8.299879    | 8.041756    | 8.39167     | 8.477524    | 8.389078    | 8.040972    |
| "Cr2"     | 2.1512685   | 2.2811868   | 2.259836    | 2.328108    | 2.2600024   | 2.8956857   | 2.2295642   | 2.3290002   |
| "Crabp1"  | 2.672894    | 2.892152    | 4.745055    | 3.0814066   | 2.7767453   | 2.7810512   | 2.8243935   | 3.214784    |
| "Crabp2"  | 2.3747191   | 2.4625514   | 2.418254    | 2.5254653   | 2.4234054   | 2.3708925   | 2.4184554   | 2.5128846   |
| "Cradd"   | 3.2197826   | 3.5998015   | 3.2168746   | 3.226234    | 3.209526    | 3.0416307   | 3.247193    | 3.2259483   |
| "Cramp1i" | 5.37584035  | 5.9226291   | 5.103917425 | 5.126516975 | 5.588844225 | 5.78128495  | 5.187056675 | 5.330789375 |
| "Crat"    | 7.423301    | 7.82045115  | 7.82403525  | 8.30681525  | 7.71357845  | 7.534124    | 7.7695205   | 8.1479255   |
| "Crb1"    | 2.6493945   | 2.756589    | 2.6686802   | 2.746235    | 2.6756525   | 2.6360967   | 2.6731462   | 2.780253    |
| "Crb3"    | 3.3981736   | 3.6050448   | 3.386476    | 3.5001779   | 3.3935134   | 3.301951    | 3.4877276   | 3.4731374   |
| "Crbn"    | 7.9253769   | 8.868644667 | 7.419446533 | 7.795768667 | 8.361252767 | 8.727883533 | 7.674234767 | 8.088196333 |
| "Crcp"    | 7.29574     | 7.30968     | 6.67607     | 6.7584753   | 6.1074347   | 6.919283    | 6.3263974   | 6.770148    |
| "Crcrt1"  | 2.7607422   | 2.457281    | 5.942503    | 2.5125294   | 2.4476607   | 2.3650272   | 2.3948672   | 2.4992266   |
| "Creb1"   | 3.211913567 | 3.278055933 | 3.320172067 | 3.328075433 | 3.238101567 | 3.169111167 | 3.3078356   | 3.403454133 |
| "Creb3"   | 7.6517724   | 7.688538767 | 7.6784358   | 7.532154333 | 7.6935      | 7.836435667 | 7.639993533 | 7.4683485   |
| "Creb3i2" | 4.62930315  | 3.9850016   | 5.3370106   | 4.765304    | 4.8673967   | 4.3743324   | 4.8091714   | 4.91804195  |
| "Creb3i3" | 6.3528605   | 2.674937    | 2.6388645   | 2.8163495   | 2.6449745   | 2.568021    | 2.599703    | 2.723702    |
| "Creb3i4" | 2.63366     | 2.7118585   | 2.656335    | 2.7815597   | 2.66057     | 2.6556904   | 2.642804    | 2.7604887   |
| "Crebbp"  | 7.636134    | 8.827621    | 7.8537884   | 8.06278     | 8.110922    | 7.996336    | 7.492893    | 8.178681    |
| "Crebzf"  | 4.8127824   | 4.85042885  | 5.0439999   | 5.0907488   | 4.94327235  | 5.56941755  | 5.3522184   | 4.82486765  |
| "Creg1"   | 10.7154105  | 9.6642795   | 9.926382    | 9.5158735   | 9.94383075  | 10.080728   | 9.7246635   | 9.7629995   |
| "Crelid1" | 7.2853713   | 6.8372884   | 6.994471    | 7.3374624   | 7.3662825   | 7.318047    | 7.28913     | 7.20905     |
| "Crelid2" | 6.591531    | 5.9839387   | 6.869839    | 6.718064    | 6.3019032   | 6.6804094   | 7.1313534   | 6.8948402   |
| "Crem"    | 5.406437067 | 3.658887467 | 3.6463584   | 3.822169167 | 3.5870684   | 3.926371867 | 3.966730567 | 3.880847333 |
| "Crhr1"   | 2.8705428   | 2.8936145   | 2.9111452   | 2.9347632   | 2.890716    | 2.8629138   | 2.8795755   | 2.933579    |
| "Crhr2"   | 3.85775315  | 4.18891185  | 4.3801517   | 4.88547235  | 4.34812415  | 3.8895935   | 4.4096614   | 4.7992422   |
| "Crim1"   | 7.0884143   | 7.538366    | 7.21898975  | 7.65886885  | 7.62435675  | 7.3994258   | 7.14191825  | 7.9002045   |

|              |             |             |             |             |             |             |             |             |
|--------------|-------------|-------------|-------------|-------------|-------------|-------------|-------------|-------------|
| "Crip1"      | 10.691364   | 9.684647    | 11.532621   | 10.855153   | 10.83025    | 10.69554    | 10.965735   | 10.7198105  |
| "Crip2"      | 8.634273    | 8.0436535   | 8.603045    | 8.276919    | 8.334479    | 8.48085     | 8.4908285   | 8.40464     |
| "Crip3"      | 2.593695    | 2.798653    | 2.6751869   | 3.1543057   | 2.7158926   | 2.7317073   | 2.7110682   | 2.843185    |
| "Cript"      | 6.820011    | 7.0456135   | 6.93234695  | 7.301362    | 6.9015163   | 6.7416936   | 6.9515811   | 7.4094911   |
| "Crisp1"     | 2.4261384   | 2.6773736   | 2.5033133   | 2.6278026   | 2.5043495   | 2.4562669   | 2.502132    | 2.607641    |
| "Crisp2"     | 2.5750256   | 2.7678256   | 2.6811614   | 2.8758059   | 2.6876438   | 2.629867    | 2.683293    | 2.7855635   |
| "Crisp3"     | 2.6079166   | 2.7672076   | 2.675475    | 2.8110778   | 2.6956608   | 2.615608    | 2.6743016   | 2.774881    |
| "Crispld1"   | 2.60568835  | 2.6651361   | 3.13804115  | 2.8882027   | 3.16879735  | 2.544487    | 2.46622125  | 3.32965735  |
| "Crk"        | 6.611689975 | 6.8474404   | 6.949353325 | 7.09861205  | 6.9902225   | 6.870500375 | 7.089793625 | 6.991363575 |
| "Crkl"       | 7.8556695   | 8.219133    | 8.397798    | 7.8297515   | 8.187105    | 8.052152    | 8.03984     | 7.7248745   |
| "Crif1"      | 2.5682313   | 2.5030658   | 2.7239752   | 3.5008385   | 2.4896295   | 2.4708827   | 2.947763    | 2.6203806   |
| "Crif2"      | 7.6159234   | 6.988295    | 7.312304    | 7.379676    | 7.313925    | 7.583543    | 7.3936605   | 7.381086    |
| "Crif3"      | 6.276067    | 5.983661    | 6.926219    | 6.958944    | 7.0977297   | 8.286128    | 7.2596235   | 6.8663473   |
| "Crnkl1"     | 4.1222311   | 5.99108265  | 4.67579555  | 4.3252397   | 4.5765849   | 5.3591115   | 5.04779095  | 4.9053278   |
| "Crot"       | 9.244921    | 8.764563    | 8.836189    | 9.544957    | 8.25596     | 7.8243933   | 8.7759577   | 9.27416     |
| "Crp"        | 9.622058    | 2.2125733   | 2.4582615   | 2.23544     | 2.1850226   | 2.132408    | 2.1766002   | 2.2503965   |
| "Crtam"      | 2.5456674   | 2.6268003   | 2.543068    | 2.6952612   | 2.5466177   | 2.4907215   | 2.541655    | 2.6500685   |
| "Crtap"      | 6.1931257   | 5.2459974   | 8.131275    | 6.816036    | 6.601984    | 6.4997444   | 6.7946897   | 6.8157783   |
| "Crtc2"      | 4.306671    | 5.2391376   | 4.368927    | 4.1650696   | 4.5169773   | 5.3650255   | 4.3881607   | 4.576408    |
| "Crtc3"      | 4.5383315   | 5.467907    | 4.7482986   | 4.753224    | 4.716707    | 4.714609    | 4.53757     | 4.323032    |
| "Crx"        | 2.5721014   | 2.734571    | 2.6289303   | 2.7706473   | 2.63719     | 2.5916035   | 2.624558    | 2.7468152   |
| "Crxos1"     | 2.5304165   | 2.669789    | 2.6053984   | 2.7371175   | 2.6035936   | 2.5398147   | 2.5955932   | 2.7343168   |
| "Cry1"       | 7.5609646   | 6.672145    | 6.3365955   | 6.6729345   | 6.6042385   | 6.032656    | 6.37882     | 6.574712    |
| "Cry2"       | 10.116186   | 11.102707   | 7.4548836   | 7.731637    | 9.200443    | 10.168871   | 7.8893704   | 7.8346551   |
| "Cryab"      | 10.31447973 | 9.578273533 | 9.858387067 | 10.0029851  | 10.38756593 | 9.8782991   | 10.36966163 | 10.27580173 |
| "Cryba4"     | 2.3262448   | 2.366956    | 2.3481393   | 2.4281127   | 2.3446808   | 2.3209975   | 2.3581653   | 2.4234407   |
| "Crybb1"     | 2.3151426   | 2.3928545   | 2.3820748   | 2.4451165   | 2.3797483   | 2.334009    | 2.3792562   | 2.446855    |
| "Crybb2"     | 3.0107067   | 3.26177     | 3.141611    | 3.2347598   | 3.1499944   | 3.1093388   | 3.1402435   | 3.2112448   |
| "Crybb3"     | 2.415716    | 2.722881    | 2.7107742   | 2.7645426   | 2.7088697   | 2.6653397   | 2.692783    | 2.764954    |
| "Crybg3"     | 7.246839    | 7.213056    | 7.2521424   | 7.338908    | 7.6641555   | 7.130983    | 7.7855763   | 7.3534255   |
| "Crygb"      | 2.8087134   | 2.8790662   | 2.834383    | 2.97641715  | 2.83640295  | 2.8014649   | 2.821916    | 2.9126722   |
| "Crygd"      | 2.3922532   | 2.4890876   | 2.4340906   | 2.5489604   | 2.3876946   | 2.4181955   | 2.439248    | 2.525311    |
| "Cryl1"      | 3.5033255   | 3.3059151   | 3.3666871   | 3.4308287   | 3.56357765  | 3.2634846   | 3.5192594   | 3.28473745  |
| "Crym"       | 5.1204143   | 5.3422227   | 5.3723083   | 6.1430063   | 4.039137    | 3.9857278   | 5.4895463   | 6.182932    |
| "Cryz"       | 7.32422765  | 6.73670775  | 7.215677    | 7.23272775  | 6.711861    | 6.4398528   | 6.97493525  | 7.12390775  |
| "Cryzl1"     | 7.221573    | 7.2474475   | 7.34883     | 7.1127787   | 7.261144    | 7.124141    | 7.9024453   | 7.56194     |
| "Cs"         | 11.81925033 | 11.770664   | 12.15361633 | 12.36670467 | 12.226425   | 11.941136   | 12.00710867 | 12.25253667 |
| "Csad"       | 6.7449613   | 5.1754007   | 5.231572    | 3.9220526   | 6.402606    | 6.600844    | 5.6445875   | 4.59816     |
| "Csda"       | 14.563071   | 14.7895515  | 14.3262675  | 14.4679805  | 14.3244655  | 14.246298   | 14.738709   | 14.4040135  |
| "Csdc2"      | 2.613749067 | 2.894521633 | 2.687897433 | 2.773143133 | 2.689296567 | 2.634575333 | 2.678576    | 2.772613    |
| "Csde1"      | 12.7163035  | 13.4397885  | 13.470964   | 13.49354    | 13.08134675 | 13.141164   | 13.051836   | 13.577629   |
| "Cse1l"      | 9.756638    | 10.173714   | 10.019082   | 9.993257    | 9.962407    | 9.85829     | 10.047519   | 9.9966345   |
| "Csfl1"      | 3.598711425 | 3.72835605  | 4.02733575  | 3.950962975 | 3.9395935   | 4.08046395  | 3.863611225 | 3.860641925 |
| "Csflr"      | 8.752844833 | 5.4103461   | 8.0084991   | 6.978667633 | 8.233567433 | 8.525481133 | 8.110427767 | 7.377298833 |
| "Csfl2ra"    | 3.3797033   | 3.0763009   | 3.364295    | 3.2408442   | 3.2027755   | 3.4085124   | 3.6463537   | 3.2189443   |
| "Csfl2rb"    | 5.775751    | 3.6460614   | 3.5840127   | 3.717856    | 3.8521287   | 5.8024807   | 4.8316574   | 3.742748    |
| "Csfl2rb2"   | 4.736825    | 3.506633    | 4.519533    | 3.5636222   | 4.694953    | 6.336349    | 4.970396    | 3.7517953   |
| "Csfl3"      | 2.414677    | 2.49817     | 2.4590838   | 2.5788639   | 2.4627788   | 2.4200158   | 2.4546366   | 2.5650048   |
| "Csfl3r"     | 3.0632386   | 3.1167266   | 3.0957024   | 3.1448696   | 3.0972648   | 3.244108    | 3.0949712   | 3.146374    |
| "Csgalnact1" | 3.1408497   | 3.3565717   | 3.4792209   | 3.76517735  | 3.46167385  | 3.3388128   | 3.54917075  | 3.6602684   |
| "Csgalnact2" | 8.951504    | 9.396367    | 9.815516    | 10.059191   | 9.286934    | 9.413901    | 9.482949    | 10.229996   |
| "Csk"        | 3.7971747   | 3.8981237   | 4.1115084   | 3.7264392   | 3.8097641   | 5.1368494   | 4.0497875   | 3.9469185   |
| "Csl"        | 3.132372    | 3.3079863   | 3.2047033   | 3.374461    | 3.2489507   | 3.215515    | 3.2526777   | 3.3245595   |
| "Csn1s1"     | 2.4012127   | 2.4610617   | 2.428965    | 2.5194376   | 2.4312005   | 2.3970392   | 2.4286795   | 2.5101078   |
| "Csn1s2a"    | 2.407385775 | 2.529248175 | 2.453035975 | 2.596068075 | 2.462632575 | 2.40547665  | 2.4521964   | 2.56469335  |
| "Csn1s2b"    | 2.4106193   | 2.5104036   | 2.4524918   | 2.636427    | 2.4580708   | 2.3977046   | 2.4552037   | 2.5588996   |
| "Csnk1a1"    | 8.291967    | 8.806581133 | 8.472084267 | 8.668447767 | 8.599108333 | 8.6906583   | 8.647253167 | 8.528417167 |
| "Csnk1d"     | 7.2736902   | 7.48692766  | 7.0696692   | 7.13848628  | 7.65026282  | 7.70483102  | 7.28300416  | 7.21580552  |
| "Csnk1e"     | 7.3986659   | 8.419664    | 7.475665    | 7.58426     | 7.879084    | 8.285886    | 7.3784184   | 7.41844975  |
| "Csnk1g1"    | 2.7447047   | 2.901919    | 3.0297515   | 2.9501357   | 2.9624822   | 2.7551367   | 3.0201356   | 3.454491    |
| "Csnk1g2"    | 7.190514    | 7.5613275   | 7.6730638   | 7.6952353   | 7.0622177   | 7.1918654   | 7.5251513   | 7.921869    |
| "Csnk2a1"    | 6.662464933 | 6.93388165  | 6.928526033 | 7.035759017 | 6.672141317 | 6.974990367 | 6.90014345  | 7.09135685  |
| "Csnk2a2"    | 7.045092333 | 7.367193333 | 6.908700267 | 6.6741203   | 7.185987133 | 7.641196933 | 6.820892333 | 6.712937467 |
| "Csnk2b"     | 10.418214   | 10.72975    | 10.614094   | 10.582428   | 10.56955    | 10.413248   | 10.680703   | 10.587967   |
| "Cspg4"      | 5.161239    | 5.2055451   | 5.96062865  | 6.03548915  | 5.7129157   | 5.1659025   | 6.14870425  | 5.91920355  |
| "Cspg5"      | 2.3701313   | 2.4338722   | 2.3867326   | 2.4535873   | 2.3868032   | 2.344462    | 2.383046    | 2.4377592   |
| "Cspp1"      | 3.7132685   | 3.84962215  | 3.73897585  | 3.679639    | 3.7910304   | 3.78640865  | 3.7349341   | 3.899469    |
| "Csprs"      | 2.5789584   | 2.804649567 | 2.833004667 | 2.707855233 | 2.6086371   | 2.600155333 | 2.6200227   | 2.684356067 |
| "Csrp1"      | 6.2957755   | 5.89772565  | 5.8252156   | 5.8045728   | 6.07363535  | 5.9373363   | 6.466021    | 5.84766515  |
| "Csrp2"      | 8.318573    | 5.0742636   | 7.043673    | 5.5807085   | 6.8694873   | 6.729583    | 6.7177033   | 5.9917955   |
| "Csrp3"      | 13.060728   | 10.871139   | 10.612112   | 10.820295   | 12.906325   | 12.471604   | 11.0872555  | 11.059942   |
| "Cst11"      | 2.564681    | 2.6961105   | 2.6260638   | 2.7656505   | 2.6259055   | 2.5766175   | 2.6201243   | 2.7114464   |
| "Cst3"       | 12.547766   | 12.624443   | 12.705987   | 12.571009   | 12.817619   | 12.665912   | 12.683319   | 12.595904   |
| "Cst6"       | 8.824883    | 8.872123    | 8.7175045   | 8.633921    | 8.400309    | 7.4550323   | 9.154247    | 8.452293    |
| "Cst7"       | 2.1773498   | 2.2406359   | 2.2034857   | 2.2970629   | 2.205174    | 2.7256956   | 2.2011845   | 2.2876325   |
| "Cst8"       | 2.7815573   | 3.1074724   | 2.818117    | 2.883975    | 2.812526    | 2.747313    | 2.814535    | 2.8831136   |
| "Cstb"       | 9.8742595   | 8.5964715   | 9.0669365   | 8.2897245   | 9.3560985   | 9.255383    | 9.6512135   | 8.30458515  |
| "Cstf1"      | 6.927107    | 7.9828367   | 6.150748    | 6.488292    | 7.1650357   | 7.4038014   | 6.4472785   | 6.3459773   |
| "Cstf2"      | 4.68842325  | 4.6862366   | 5.16616275  | 4.7684958   | 4.7441381   | 4.7269903   | 4.8945165   | 4.8823074   |
| "Cstf2t"     | 8.70433     | 9.504057    | 9.218686    | 9.410495    | 9.315326    | 9.326103    | 8.971017    | 9.315022    |
| "Cstf3"      | 5.683404    | 5.2651434   | 6.569228    | 5.646218    | 5.7915506   | 5.5003366   | 6.6803956   | 6.1739674   |

|             |             |             |             |             |             |             |             |             |
|-------------|-------------|-------------|-------------|-------------|-------------|-------------|-------------|-------------|
| "Ctage5"    | 8.621611    | 9.704171    | 7.7450747   | 7.6423173   | 8.685971    | 8.773845    | 7.28973     | 7.5043797   |
| "Ctbp1"     | 10.503719   | 10.816469   | 11.2077875  | 11.342532   | 10.596261   | 10.635954   | 10.995417   | 11.231489   |
| "Ctbp2"     | 6.61829445  | 6.6869242   | 7.18397595  | 7.221287    | 6.90457935  | 6.585125    | 7.33438775  | 6.8979303   |
| "Ctbs"      | 4.12744345  | 3.51403165  | 3.8200059   | 3.87487185  | 3.9576646   | 3.43534445  | 4.16438715  | 3.6962676   |
| "Ctcf"      | 8.12986725  | 8.5991805   | 8.754651    | 8.694978    | 8.3621355   | 8.515729    | 8.5764035   | 8.633263    |
| "Ctdnep1"   | 7.428941    | 7.438587    | 8.427716    | 8.513391    | 7.844383    | 6.912301    | 8.306921    | 8.123625    |
| "Ctdp1"     | 6.9909043   | 7.9776325   | 5.7618694   | 5.928168    | 7.359736    | 8.379776    | 5.8913083   | 6.063426    |
| "Ctdsp1"    | 8.210719    | 8.57464     | 8.621216    | 8.35043     | 8.334633    | 8.387459    | 8.55998     | 8.333187    |
| "Ctdsp2"    | 9.116116333 | 9.825198333 | 8.615507767 | 8.7620361   | 9.003118    | 9.200042    | 8.9072958   | 8.6731056   |
| "Ctdspl"    | 6.3242927   | 6.7396636   | 6.7649713   | 6.259138    | 8.438747    | 8.066437    | 7.2052956   | 6.5821815   |
| "Ctf1"      | 5.4149404   | 5.3442745   | 5.985093    | 5.5607867   | 5.7170796   | 5.209799    | 5.4695535   | 5.680664    |
| "Ctgf"      | 10.00665    | 9.660536    | 10.424278   | 9.544876    | 9.620131    | 10.221995   | 9.081188    | 9.846043    |
| "Cth"       | 12.534038   | 6.287839    | 5.0770845   | 4.2854795   | 6.550976    | 6.447081    | 5.818145    | 5.900188    |
| "Ctla2a"    | 8.4233115   | 9.172484    | 7.3515951   | 7.6299825   | 9.1595585   | 9.4778675   | 7.9374728   | 8.1202055   |
| "Ctla2b"    | 7.827138    | 6.96417     | 6.1830244   | 6.4672313   | 7.2661095   | 7.783188    | 6.580846    | 6.551914    |
| "Ctla4"     | 2.3484302   | 2.7641344   | 2.405867    | 2.490592    | 2.391841    | 2.7278461   | 2.407163    | 2.4877748   |
| "Ctnna1"    | 8.035700467 | 8.323108    | 7.816834933 | 7.6202289   | 8.293494867 | 8.400248933 | 7.835241867 | 7.819843833 |
| "Ctnna2"    | 2.7015297   | 2.8143988   | 2.7230897   | 2.872577    | 2.7238898   | 2.658246    | 2.7111053   | 2.8370843   |
| "Ctnnal1"   | 5.95344     | 5.9312096   | 6.205513    | 5.959745    | 6.0102267   | 5.0670714   | 6.0757895   | 6.4989734   |
| "Ctnnb1"    | 8.777601367 | 9.160118867 | 9.484324867 | 9.435287667 | 9.0606121   | 9.405284667 | 9.051282767 | 9.599345667 |
| "Ctnnbip1"  | 5.372076    | 6.06109115  | 6.45466135  | 5.6882119   | 5.41830225  | 5.74835765  | 6.9356562   | 6.29825545  |
| "Ctnnbl1"   | 7.0702395   | 7.31624     | 6.805565    | 6.157726    | 6.852734    | 6.967682    | 7.0821404   | 6.394563    |
| "Ctnnd1"    | 2.5234952   | 2.543753    | 2.5381725   | 2.5901794   | 2.5521696   | 2.5158875   | 2.5350456   | 2.5805316   |
| "Ctnnd2"    | 2.6481757   | 2.7169797   | 2.6670253   | 2.7388673   | 2.6711307   | 2.64331     | 2.6679087   | 2.739521    |
| "Ctns"      | 4.131499    | 4.806549    | 4.0609016   | 4.2960024   | 5.1067286   | 4.7196393   | 3.8633628   | 4.296713    |
| "Ctps"      | 7.941797    | 8.175916    | 8.036288    | 8.04652     | 7.6531687   | 7.6594625   | 8.409567    | 7.973086    |
| "Ctps2"     | 4.6845616   | 5.21742485  | 4.3111551   | 3.8400925   | 4.81162115  | 5.37184     | 4.41808775  | 3.9833487   |
| "Ctrp"      | 4.04632915  | 4.2168275   | 4.30046295  | 4.30781875  | 4.33451075  | 4.01221525  | 4.2321751   | 4.219489725 |
| "Ctrb1"     | 4.6249123   | 2.3396835   | 2.330779    | 2.3743289   | 2.329482    | 2.2796998   | 2.30866     | 2.3657708   |
| "Cts3"      | 2.7465847   | 2.9251409   | 2.8302877   | 2.993326    | 2.8437216   | 2.781979    | 2.8222718   | 2.9535372   |
| "Cts6"      | 2.3359535   | 2.4226267   | 2.3728755   | 2.4887507   | 2.374159    | 2.3341167   | 2.3710716   | 2.471831    |
| "Cts8"      | 2.5498602   | 2.7791386   | 2.6049685   | 2.74612     | 2.6130905   | 2.5674486   | 2.603445    | 2.7282465   |
| "Ctsa"      | 8.800788    | 8.238109    | 8.827944    | 8.34935     | 8.820976    | 8.681399    | 8.666205    | 8.466589    |
| "Ctsb"      | 8.4166969   | 6.955660775 | 8.208461125 | 7.75691725  | 8.337585225 | 7.85939935  | 8.52251325  | 8.08425825  |
| "Ctsc"      | 10.516992   | 8.025219    | 10.440791   | 9.844002    | 9.8149395   | 9.887136    | 10.376393   | 9.9399395   |
| "Ctsd"      | 10.683639   | 10.061304   | 9.914709    | 9.812667    | 10.359934   | 10.392833   | 10.6382     | 9.947755    |
| "Ctse"      | 2.0706491   | 2.2335637   | 2.166774    | 2.2535672   | 2.1789715   | 2.4233863   | 2.1818063   | 2.2565715   |
| "Ctsf"      | 7.0975766   | 7.059734    | 6.802865    | 6.6181808   | 7.595356    | 7.0868225   | 6.4265857   | 6.7594543   |
| "Ctsg"      | 2.1757834   | 2.2594883   | 2.2047558   | 2.284939    | 2.200409    | 2.5036032   | 2.1919878   | 2.2659824   |
| "Ctsh"      | 9.840763    | 6.3470573   | 8.932242    | 7.471573    | 8.282546    | 8.957297    | 8.633912    | 7.8047514   |
| "Ctsk"      | 5.305433    | 3.9716177   | 8.194209    | 6.576129    | 6.7702017   | 6.7757397   | 5.7924128   | 7.0114684   |
| "Ctsl"      | 13.801287   | 13.980357   | 11.880175   | 11.168348   | 13.324596   | 13.938949   | 11.824649   | 11.573288   |
| "Ctsll3"    | 2.2880795   | 2.3887339   | 2.3507786   | 2.4469001   | 2.350667    | 2.3073437   | 2.341559    | 2.4303756   |
| "Ctsm"      | 2.797613    | 2.9813392   | 2.8606467   | 3.046161    | 2.874724    | 2.8145597   | 2.8586981   | 2.9958584   |
| "Ctsq"      | 2.3592677   | 2.431849    | 2.386826    | 2.4849052   | 2.388014    | 2.3547652   | 2.380286    | 2.4637892   |
| "Ctsr"      | 2.5870702   | 2.6989431   | 2.6401224   | 2.7681928   | 2.6471133   | 2.6114523   | 2.6382432   | 2.7487185   |
| "Ctss"      | 11.09312    | 6.7925754   | 8.734926    | 7.8519135   | 9.1493435   | 10.085016   | 10.6965955  | 8.2067      |
| "Ctsw"      | 2.160634    | 2.1952775   | 2.1749358   | 2.2422595   | 2.175397    | 2.8834236   | 2.1736202   | 2.2154257   |
| "Ctssz"     | 10.200345   | 8.620516433 | 9.056055    | 8.761555    | 9.472803167 | 9.886665667 | 9.834587167 | 8.806068667 |
| "Cttn"      | 5.8047138   | 5.9683682   | 5.8369135   | 5.67150946  | 5.84129896  | 5.91374744  | 5.86762394  | 5.74491488  |
| "Cttnbp2nl" | 3.66644945  | 2.7232769   | 2.55228295  | 2.59485735  | 2.72794985  | 3.1680532   | 2.681067    | 2.6113891   |
| "Ctu1"      | 3.9206898   | 3.9703188   | 3.82421     | 4.018771    | 4.5347958   | 4.123413    | 4.1737776   | 4.0240955   |
| "Cuedc1"    | 4.812148267 | 4.995376433 | 5.658256667 | 6.051768267 | 5.386649667 | 4.846856667 | 5.265992333 | 5.653435067 |
| "Cuedc2"    | 8.701856    | 8.800538    | 9.073532    | 9.027353    | 8.796417    | 8.4447      | 9.085108    | 8.979051    |
| "Cul1"      | 9.795897    | 10.829274   | 9.90086     | 10.026703   | 10.270603   | 10.735941   | 9.747013    | 9.909796    |
| "Cul2"      | 6.334217    | 7.0093725   | 7.1281662   | 7.27869385  | 6.6191065   | 6.4053488   | 6.99558615  | 7.2445425   |
| "Cul3"      | 8.681014767 | 9.682366667 | 9.396668333 | 9.833544333 | 9.076688333 | 9.366631333 | 9.088243667 | 9.826224333 |
| "Cul4a"     | 7.980983    | 8.207211    | 8.268609    | 8.463716    | 8.258723    | 7.92206     | 8.3248005   | 8.446956    |
| "Cul4b"     | 6.6485758   | 6.809768    | 6.191733    | 6.25647125  | 7.06073     | 7.515003    | 6.6437519   | 6.56570965  |
| "Cul7"      | 3.77289     | 3.6680226   | 4.7042723   | 4.6240997   | 4.8259544   | 4.2668943   | 4.76318     | 4.6266966   |
| "Cul9"      | 3.190597    | 3.2217455   | 3.2060087   | 3.2824745   | 3.204876    | 3.251988    | 3.0890014   | 3.2668078   |
| "Cuta"      | 8.858977    | 9.303959    | 9.514005    | 9.299233    | 9.07246     | 8.595704    | 9.397325    | 9.200128    |
| "Cutc"      | 7.4285827   | 7.11249     | 7.6341043   | 7.7274137   | 7.3215895   | 6.548806    | 7.73559     | 7.5065413   |
| "Cux1"      | 4.009726    | 4.47540914  | 4.30834744  | 4.5453301   | 4.23693306  | 4.32550394  | 4.22272992  | 4.36821782  |
| "Cux2"      | 2.7227423   | 2.64286     | 2.5876184   | 2.6870043   | 2.5762346   | 2.5915647   | 2.571349    | 2.6740215   |
| "Cuzd1"     | 3.2305057   | 3.6984172   | 3.2346075   | 3.4436548   | 3.2816641   | 3.3161097   | 2.9606893   | 4.1931906   |
| "Cwc15"     | 10.16041    | 10.585328   | 10.27247    | 10.301184   | 10.187614   | 10.059994   | 10.528133   | 10.197832   |
| "Cwc22"     | 6.85575     | 7.8241606   | 6.1883016   | 6.6755924   | 7.127611    | 7.2722635   | 6.276285    | 6.6818147   |
| "Cwc27"     | 6.332093    | 7.1200686   | 6.793637    | 7.0570536   | 6.8867292   | 6.7583075   | 7.188826    | 7.2225533   |
| "Cwf19l1"   | 3.7271993   | 5.437581    | 4.264001    | 4.409941    | 4.363018    | 4.124481    | 4.2600846   | 4.669735    |
| "Cwh43"     | 2.440884    | 2.4959033   | 2.4690423   | 2.5589862   | 2.4690619   | 2.4452956   | 2.4641623   | 2.5442119   |
| "Cx3cl1"    | 2.33126435  | 2.3976586   | 2.511598    | 2.44130115  | 2.36189975  | 2.34526975  | 2.3591976   | 2.4472841   |
| "Cx3cr1"    | 2.6088499   | 2.68773735  | 2.6525362   | 2.7277477   | 2.65011085  | 2.6277127   | 2.65076025  | 2.71489335  |
| "Cxadr"     | 2.55295575  | 2.7111311   | 2.49646225  | 2.6045377   | 2.49716185  | 2.47138325  | 2.4621222   | 2.54444165  |
| "Cxc11"     | 9.630547    | 2.871994    | 3.2592545   | 3.5474215   | 2.8854032   | 2.7881434   | 3.5586543   | 3.7108722   |
| "Cxc110"    | 7.503146    | 3.8845782   | 3.8857985   | 3.93742     | 3.8037248   | 3.7806742   | 6.6731954   | 3.8186977   |
| "Cxc111"    | 2.6574304   | 2.8192236   | 2.74132325  | 2.88572205  | 2.74670135  | 2.6954714   | 2.73406685  | 2.8152295   |
| "Cxc112"    | 8.448311    | 7.5594705   | 9.1229505   | 9.0118585   | 8.426117    | 9.0014375   | 8.5905385   | 9.017929    |
| "Cxc113"    | 10.867678   | 7.0236855   | 3.3947183   | 3.2349894   | 8.509921    | 11.0256335  | 6.1948038   | 3.2041429   |
| "Cxc114"    | 5.063403    | 5.2591818   | 4.7484355   | 5.1100395   | 4.01760985  | 4.55036225  | 4.8938585   | 4.89193865  |
| "Cxc116"    | 4.17541135  | 2.91640485  | 3.48691615  | 2.96169065  | 2.8972578   | 3.0388215   | 2.9734359   | 2.9717791   |

|            |             |             |             |             |             |             |             |             |
|------------|-------------|-------------|-------------|-------------|-------------|-------------|-------------|-------------|
| "Cxc12"    | 5.9637036   | 2.4903498   | 2.4533489   | 2.551408    | 2.459058    | 2.381926    | 2.4592128   | 2.536252    |
| "Cxc15"    | 2.787448    | 2.9718704   | 2.7778559   | 2.9036264   | 2.794036    | 2.7167616   | 2.7764575   | 2.8854659   |
| "Cxc19"    | 4.3358355   | 3.2016988   | 3.694266    | 2.8207848   | 3.6886725   | 3.6745791   | 6.3286953   | 3.5692105   |
| "Cxcr2"    | 2.4207778   | 2.490553    | 2.4573479   | 2.5246263   | 2.4689295   | 2.4509292   | 2.467611    | 2.527138    |
| "Cxcr3"    | 2.3341293   | 2.3660166   | 2.35354     | 2.413301    | 2.3613975   | 3.0583825   | 2.3256521   | 2.4068148   |
| "Cxcr4"    | 2.7456484   | 2.8322713   | 2.8311255   | 2.8907      | 3.4896252   | 4.544608    | 2.8093064   | 2.8845294   |
| "Cxcr5"    | 2.1924176   | 2.2605052   | 2.2237377   | 2.303821    | 2.2238355   | 2.9869125   | 2.2234163   | 2.2945073   |
| "Cxcr6"    | 2.4807585   | 2.59421415  | 2.5335051   | 2.66036715  | 2.539243    | 2.7799701   | 2.53319315  | 2.6341485   |
| "Cxcr7"    | 8.611094    | 8.209087    | 10.27659    | 9.975505    | 9.300781    | 8.98867     | 8.859339    | 9.853642    |
| "Cxx1a"    | 6.6159034   | 7.2801833   | 6.617283    | 6.580701    | 6.5907197   | 6.688302    | 6.770816    | 6.616738    |
| "Cxx1c"    | 3.1917663   | 3.362619    | 3.3885438   | 3.109124    | 3.6801846   | 3.7004623   | 3.3914545   | 3.4361289   |
| "Cxxc1"    | 4.57007485  | 4.8069795   | 4.5138446   | 4.5111052   | 4.57098305  | 4.53761245  | 4.61577015  | 4.55966835  |
| "Cxxc5"    | 3.79536915  | 2.7986889   | 6.8461735   | 6.3807645   | 5.0628593   | 3.84493395  | 6.18697765  | 5.8567193   |
| "Cyb5"     | 11.954269   | 9.997332    | 10.705435   | 9.922796    | 11.251179   | 12.000125   | 11.19179    | 10.31986    |
| "Cyb561"   | 3.0160275   | 2.82973     | 3.0158226   | 2.898457    | 2.818415    | 2.7910604   | 2.80139     | 2.877036    |
| "Cyb561d2" | 2.8584223   | 2.4623883   | 2.4422548   | 2.6439803   | 2.2868378   | 2.423862    | 2.4584959   | 2.5031924   |
| "Cyb5b"    | 7.608489533 | 7.566239533 | 8.078087167 | 8.804561    | 7.783438033 | 7.7223246   | 8.0594816   | 8.047718233 |
| "Cyb5d1"   | 5.240308    | 6.271997    | 6.2165937   | 5.9902377   | 5.716005    | 5.4481087   | 5.1437335   | 6.307544    |
| "Cyb5r1"   | 9.451727    | 9.281589    | 9.692776    | 9.976362    | 9.149689    | 8.706161    | 9.904552    | 9.810711    |
| "Cyb5r3"   | 5.86061655  | 5.1292034   | 5.4328011   | 5.179670825 | 5.386520475 | 5.2888811   | 5.5870069   | 5.3141053   |
| "Cyb5r4"   | 8.657513    | 8.9486065   | 9.287163    | 9.700567    | 8.681384    | 8.540235    | 9.29525     | 9.567089    |
| "Cyb5r1"   | 2.1875572   | 2.4961421   | 2.270133    | 2.3180044   | 2.2448845   | 2.121682    | 2.2299342   | 2.318266    |
| "Cyba"     | 7.8189883   | 5.8485484   | 7.2398844   | 5.9439187   | 6.8706512   | 8.1109915   | 7.733274    | 6.4180794   |
| "Cybb"     | 3.2585092   | 2.4251015   | 2.3902445   | 2.4531362   | 2.3995895   | 3.04144     | 3.1398373   | 2.4785378   |
| "Cyc1"     | 12.615722   | 12.375076   | 12.848216   | 13.03156    | 13.038819   | 12.393528   | 12.65022    | 12.922371   |
| "Cycs"     | 13.05214733 | 13.14478833 | 13.58291067 | 14.00890017 | 13.53037983 | 13.20438933 | 13.14597467 | 13.91345267 |
| "Cyc1"     | 3.1411774   | 3.416403    | 3.254643    | 3.4164653   | 3.2582762   | 3.1621644   | 3.2250872   | 3.382065    |
| "Cyfip1"   | 9.487795    | 9.1701565   | 9.302993    | 9.218415    | 9.490379    | 9.82728     | 9.563307    | 9.31196     |
| "Cyfip2"   | 2.338911    | 1.7347903   | 2.052029    | 2.4702535   | 2.4483643   | 3.3981674   | 2.3477144   | 3.003288    |
| "Cygb"     | 4.380814    | 4.5742927   | 4.8628426   | 5.0560803   | 4.8108473   | 5.2076654   | 4.950261    | 5.159384    |
| "Cyhr1"    | 4.97851404  | 5.2702386   | 5.30615848  | 5.41130816  | 5.1364082   | 4.92430044  | 5.08564626  | 5.35068162  |
| "Cylc1"    | 2.9801254   | 3.4306123   | 3.1187158   | 3.3022275   | 3.1633308   | 3.0500677   | 3.1123092   | 3.2352643   |
| "Cyp11a1"  | 2.3571177   | 2.4382186   | 2.4105904   | 2.5478632   | 2.409365    | 2.3818252   | 2.4083986   | 2.4801927   |
| "Cyp17a1"  | 7.673218    | 1.8974712   | 1.8789252   | 1.9451647   | 1.8828053   | 1.8547827   | 1.8808246   | 1.9430983   |
| "Cyp19a1"  | 2.2358665   | 2.3606157   | 2.3173387   | 2.4177794   | 2.31928     | 2.279594    | 2.3106315   | 2.427122    |
| "Cyp1a1"   | 2.9233918   | 3.1601038   | 3.1619358   | 3.2477388   | 3.0498853   | 3.1476443   | 3.575034    | 3.1808546   |
| "Cyp1a2"   | 8.211791    | 2.14333     | 2.1255136   | 2.1780326   | 2.1143603   | 2.0753582   | 2.1210854   | 2.180389    |
| "Cyp1b1"   | 3.8351827   | 2.9924893   | 2.63065665  | 2.83576335  | 3.99688075  | 5.3093921   | 2.91468455  | 2.97949695  |
| "Cyp24a1"  | 2.43838785  | 2.49201955  | 2.46503415  | 2.5796447   | 2.46291225  | 2.41221035  | 2.4476403   | 2.5402531   |
| "Cyp26a1"  | 6.2083344   | 1.8631912   | 1.8442293   | 1.9091551   | 1.8431289   | 1.8225082   | 1.8393412   | 1.8834581   |
| "Cyp27a1"  | 10.541935   | 10.462709   | 8.653809    | 9.138785    | 9.8242445   | 10.234826   | 8.325642    | 9.042919    |
| "Cyp2a12"  | 7.1857247   | 2.0257115   | 1.9931693   | 2.0555086   | 2.0061135   | 1.9619846   | 1.9883188   | 2.067923    |
| "Cyp2a4"   | 10.258608   | 2.2195313   | 4.573559    | 2.2749023   | 2.230244    | 2.151334    | 2.2304676   | 2.2681944   |
| "Cyp2b10"  | 8.947486333 | 2.571058767 | 2.642225867 | 2.585254767 | 2.619705267 | 2.5384678   | 2.2098833   | 2.325980267 |
| "Cyp2b19"  | 2.381608    | 2.4757967   | 2.4221454   | 2.5347996   | 2.4269423   | 2.3991144   | 2.4210405   | 2.522861    |
| "Cyp2b9"   | 2.8468874   | 2.2880225   | 2.2479064   | 2.340851    | 2.2649794   | 2.2270248   | 2.2563658   | 2.3340483   |
| "Cyp2c29"  | 8.510878    | 2.3380704   | 2.3038654   | 2.3785396   | 2.3178105   | 2.2440727   | 2.2919867   | 2.4331183   |
| "Cyp2c37"  | 8.940808    | 2.724697    | 2.9035068   | 2.7192369   | 2.7958417   | 2.5473497   | 2.5720963   | 2.7733293   |
| "Cyp2c38"  | 2.33921     | 2.3444872   | 2.3275495   | 2.3876905   | 2.3456404   | 2.3064163   | 2.33573     | 2.5399094   |
| "Cyp2c44"  | 6.5409193   | 2.1897254   | 2.1819267   | 2.2446837   | 2.179955    | 2.1614437   | 2.1621647   | 2.239042    |
| "Cyp2c50"  | 10.2922325  | 3.507657    | 4.502765    | 3.5336509   | 4.3671384   | 3.1629763   | 3.2644649   | 4.770337    |
| "Cyp2c54"  | 6.4468293   | 1.7896036   | 1.770893    | 1.8406354   | 1.7900268   | 1.7512842   | 1.7854215   | 1.8364223   |
| "Cyp2c65"  | 2.428147    | 2.5010986   | 2.4477239   | 2.5442133   | 2.4459682   | 2.394195    | 2.4364057   | 2.522929    |
| "Cyp2c68"  | 10.666645   | 2.628254    | 3.5817409   | 2.4694827   | 2.4889643   | 2.3615057   | 2.4226148   | 2.467537    |
| "Cyp2c70"  | 11.294845   | 2.1667528   | 4.0028014   | 2.2206028   | 2.1760504   | 2.1275914   | 2.1677997   | 2.2188847   |
| "Cyp2d10"  | 10.366225   | 2.7412508   | 3.4293315   | 2.812829    | 3.6433904   | 2.657933    | 2.6872478   | 2.8749924   |
| "Cyp2d12"  | 2.5859673   | 2.7173731   | 2.6346157   | 2.7789698   | 2.6393566   | 2.583473    | 2.6351213   | 2.7369287   |
| "Cyp2d22"  | 6.2682474   | 5.70086695  | 3.7711147   | 4.1887685   | 6.0352015   | 6.410816    | 4.5626116   | 4.4800005   |
| "Cyp2d26"  | 9.711626    | 2.3295314   | 2.3646522   | 2.3847907   | 2.3189893   | 2.2586112   | 2.2827373   | 2.3746068   |
| "Cyp2d9"   | 6.318464    | 2.9372766   | 2.8557847   | 2.9384754   | 2.896879    | 2.788185    | 2.8271432   | 2.925208    |
| "Cyp2e1"   | 12.51147    | 11.095859   | 8.631497    | 7.4110317   | 12.4130945  | 13.201902   | 11.669573   | 9.695422    |
| "Cyp2f2"   | 7.3920813   | 1.9271076   | 2.2887092   | 2.0707297   | 2.585141    | 3.9206007   | 4.126811    | 2.325774    |
| "Cyp2j13"  | 2.78093     | 2.951054    | 2.8168468   | 2.9302068   | 2.8218145   | 2.780199    | 2.8076353   | 2.9080381   |
| "Cyp2j5"   | 5.2234258   | 2.3987275   | 2.3624554   | 2.45662325  | 2.36873885  | 2.3355643   | 2.37398225  | 2.4526377   |
| "Cyp2j6"   | 3.6938462   | 3.6009789   | 4.1078305   | 4.0956984   | 4.3164277   | 3.7725842   | 4.2457986   | 4.014159    |
| "Cyp2j9"   | 2.3499012   | 2.3555913   | 2.2984147   | 2.4241664   | 2.3203418   | 2.4188268   | 2.444641    | 2.4045424   |
| "Cyp39a1"  | 6.6527796   | 3.253154    | 3.7069364   | 3.4240065   | 3.4624262   | 3.1874776   | 3.5279186   | 3.527068    |
| "Cyp3a11"  | 12.409155   | 1.4376997   | 7.0346117   | 1.4733262   | 5.653143    | 1.4110755   | 1.4301515   | 5.2099376   |
| "Cyp3a13"  | 9.555749    | 3.345165    | 3.1678894   | 3.3745968   | 3.2537267   | 3.2289293   | 3.1658125   | 3.307284    |
| "Cyp3a16"  | 2.7790928   | 2.9833121   | 2.9160836   | 3.077287    | 2.9235115   | 2.8168132   | 2.8998723   | 3.01457     |
| "Cyp3a25"  | 9.626839    | 2.4325104   | 2.4283957   | 2.4872336   | 2.8620234   | 2.3642447   | 2.3948975   | 2.8003922   |
| "Cyp3a41a" | 8.18741     | 3.1500587   | 7.2227187   | 3.2509143   | 5.766523    | 2.9735258   | 3.037117    | 3.2196648   |
| "Cyp3a44"  | 3.0414317   | 3.0055878   | 2.9352677   | 3.0751252   | 2.9503672   | 2.8210797   | 2.9151716   | 3.0409572   |
| "Cyp4a10"  | 7.0143466   | 2.230186    | 2.1766286   | 2.2862241   | 2.8696852   | 2.1592543   | 2.1609888   | 2.2785006   |
| "Cyp4a14"  | 3.7529185   | 2.7415152   | 2.6861446   | 2.7589207   | 2.9930193   | 2.616642    | 2.6669993   | 2.7541618   |
| "Cyp4a31"  | 2.7550826   | 2.8944995   | 2.7984006   | 2.9496639   | 2.802979    | 2.7589831   | 2.8062887   | 2.9275022   |
| "Cyp4b1"   | 6.3152018   | 6.1331205   | 6.1668453   | 6.239712    | 7.5264506   | 8.589213    | 7.3803267   | 6.56984     |
| "Cyp4f13"  | 3.3337007   | 2.7697668   | 2.7202575   | 2.673835    | 2.7692542   | 3.040605    | 2.754673    | 2.79589     |
| "Cyp4f14"  | 4.279817    | 1.8290976   | 1.8293865   | 1.8683332   | 1.7832667   | 1.795749    | 1.8174981   | 1.8676654   |
| "Cyp4f15"  | 2.9104831   | 2.2076015   | 2.1953497   | 2.2677212   | 2.1960187   | 2.1627655   | 2.194654    | 2.253656    |
| "Cyp4f16"  | 2.256295867 | 2.3344071   | 2.372212267 | 2.370206033 | 2.384121333 | 2.299630567 | 2.3418644   | 2.374212967 |

|                 |             |             |             |             |             |             |             |             |
|-----------------|-------------|-------------|-------------|-------------|-------------|-------------|-------------|-------------|
| "Cyp4f18"       | 2.9376075   | 2.9244883   | 2.9709852   | 3.0171824   | 2.9685667   | 3.6401336   | 3.058081    | 2.9823143   |
| "Cyp4v3"        | 8.09251025  | 3.0572965   | 4.3252753   | 3.59473845  | 4.660061    | 4.57674835  | 4.6071701   | 4.10618365  |
| "Cyp51"         | 7.1668285   | 3.1152155   | 3.692422    | 3.1598572   | 2.8093195   | 3.85299755  | 3.4751613   | 3.51652465  |
| "Cyp7a1"        | 2.3701053   | 2.448495    | 2.4015052   | 2.510547    | 2.4002144   | 2.3563895   | 2.3973205   | 2.4828703   |
| "Cyp7b1"        | 9.584972    | 2.78052725  | 2.6739224   | 2.82444525  | 2.9073888   | 2.59342325  | 2.78095965  | 3.3942473   |
| "Cyp8b1"        | 8.384294    | 2.2019942   | 2.172214    | 2.2242923   | 2.1781847   | 2.1442397   | 2.1769035   | 2.2423627   |
| "Cyr61"         | 9.9133775   | 8.36018335  | 7.1262412   | 7.6561855   | 9.0222715   | 7.8382158   | 8.516576    | 7.713726    |
| "Cys1"          | 3.992657    | 4.023854    | 4.017683    | 4.5156274   | 4.01485     | 3.7238078   | 3.9270616   | 4.647812    |
| "Cysltr1"       | 2.35624315  | 2.42422375  | 3.11463665  | 2.7686425   | 2.48351515  | 2.64984765  | 3.11594225  | 2.90593465  |
| "Cyth1"         | 8.654572    | 8.324479    | 8.499505    | 8.755789    | 8.745458    | 8.726833    | 8.325484    | 8.796831    |
| "Cyth2"         | 6.7730966   | 6.6509356   | 6.239673    | 6.296841    | 6.5164976   | 7.096021    | 6.5710754   | 6.5037785   |
| "Cyth3"         | 6.930199    | 7.424898    | 7.0079203   | 6.738155    | 7.1828084   | 7.2831087   | 6.9702654   | 7.0732985   |
| "Cytip"         | 5.870963    | 2.5239396   | 2.58399335  | 2.42114615  | 2.6367232   | 7.561367    | 3.1233387   | 2.6610625   |
| "Cyyr1"         | 2.6489558   | 2.6741872   | 2.664044    | 2.7290673   | 2.759674    | 2.6661897   | 2.5820806   | 2.7031786   |
| "D030029J20Rik" | 5.073188    | 4.2967834   | 5.2281227   | 5.087096    | 5.504257    | 5.466185    | 5.173341    | 5.5243397   |
| "D030056L22Rik" | 5.6216043   | 5.95669625  | 6.0421969   | 5.882089    | 5.9304452   | 5.79736135  | 6.0600642   | 6.051914    |
| "DOH4S114"      | 7.0909835   | 7.5311389   | 11.423829   | 11.8465025  | 8.848547    | 8.5358878   | 8.26680785  | 11.4142355  |
| "DOKist5"       | 2.314333    | 2.4822931   | 2.3292584   | 2.4206567   | 2.340097    | 2.2860389   | 2.3290257   | 2.3998413   |
| "D10Jhu81e"     | 10.87591    | 10.793091   | 11.272774   | 11.342622   | 11.13067    | 10.966652   | 10.999558   | 11.314272   |
| "D10Wsu102e"    | 6.0985665   | 5.1213593   | 3.4646351   | 3.7897296   | 4.119317    | 4.738425    | 4.3477297   | 4.396925    |
| "D10Wsu159e"    | 2.30711     | 2.3697755   | 2.3386354   | 2.4217086   | 2.3479543   | 2.303299    | 2.3469763   | 2.4167135   |
| "D10Wsu52e"     | 6.358379333 | 6.535544333 | 6.306874067 | 6.291509533 | 6.459822833 | 6.711001833 | 6.205918667 | 6.411648233 |
| "D11Ertdd326e"  | 2.9513175   | 3.0624301   | 2.9601908   | 3.0949368   | 2.9605699   | 3.0655818   | 2.968522    | 3.0487266   |
| "D11Wsu99e"     | 8.327183233 | 8.7141324   | 8.682094333 | 8.880403667 | 8.0130275   | 8.217275667 | 8.768031867 | 8.725587    |
| "D13Ertdd37e"   | 2.7464802   | 3.0200732   | 2.86892     | 3.0582182   | 2.883908    | 2.7702491   | 2.8760836   | 2.9935336   |
| "D15Ertdd30e"   | 2.72992     | 3.3100705   | 2.7880812   | 2.8511925   | 2.7872458   | 2.8892577   | 2.7370803   | 2.8247876   |
| "D15Ertdd50e"   | 2.7064698   | 3.0242016   | 2.8107047   | 3.0353835   | 2.8321486   | 2.716116    | 2.808306    | 2.9239757   |
| "D15Ertdd55e"   | 2.6130639   | 2.787674    | 2.689428    | 2.80031185  | 2.68356955  | 2.6516241   | 2.6824932   | 2.7711966   |
| "D15Ertdd621e"  | 7.0015001   | 6.5122228   | 6.39582835  | 6.0902075   | 6.96411825  | 6.8254075   | 6.646265    | 6.39288855  |
| "D16Ertdd472e"  | 5.4327432   | 3.480357967 | 3.697970767 | 3.784225467 | 3.970957867 | 4.394344567 | 3.712975233 | 3.8099823   |
| "D16H225680E"   | 9.0755625   | 9.646066    | 7.324232    | 7.546056    | 9.441122    | 9.526697    | 8.176892    | 8.019142    |
| "D17H6556E-3"   | 2.6328182   | 2.7283814   | 3.1539204   | 2.738354    | 2.671282    | 2.56075     | 2.603122    | 2.7084148   |
| "D17H6556E-5"   | 3.6674011   | 3.4323466   | 3.7595372   | 3.5365247   | 3.90486285  | 7.2213478   | 4.0974588   | 3.554351    |
| "D17Wsu104e"    | 6.1539592   | 6.1321251   | 6.128491867 | 5.5363089   | 5.9629776   | 5.643500867 | 5.585894133 | 5.587550333 |
| "D17Wsu92e"     | 8.751193    | 8.851305    | 9.010625    | 9.575511    | 8.670166    | 8.365488    | 8.91246     | 9.3696995   |
| "D18Ertdd232e"  | 6.512889    | 3.1074784   | 3.0050583   | 3.1018567   | 2.9412177   | 3.7561119   | 3.00097     | 3.0640101   |
| "D18Ertdd653e"  | 3.0239441   | 3.2156332   | 3.1200323   | 3.27218     | 3.1396029   | 3.07659185  | 3.124719    | 3.30993605  |
| "D19Bwg1357e"   | 5.8596165   | 6.16557435  | 5.8827798   | 5.767112    | 5.6978258   | 6.1683337   | 5.6939976   | 5.8035605   |
| "D19Wsu162e"    | 8.921266133 | 9.253204333 | 7.1634262   | 6.6501498   | 8.136677    | 8.298381433 | 7.326391667 | 7.152429833 |
| "D1Ertdd164e"   | 2.2932038   | 2.3662877   | 2.3377528   | 2.4137156   | 2.338233    | 2.3122857   | 2.3200161   | 2.4131947   |
| "D1Ertdd622e"   | 5.06359535  | 4.67973115  | 7.2237755   | 7.721651    | 5.15594005  | 5.1422867   | 6.49524275  | 7.110549    |
| "D1Ertdd75e"    | 3.0919402   | 4.1495404   | 3.8720157   | 3.5179107   | 3.4158742   | 3.6668777   | 3.407771    | 3.2874954   |
| "D1Ertdd83e"    | 2.4115295   | 2.4647856   | 2.4313037   | 2.5143702   | 2.4365659   | 2.4095187   | 2.4345627   | 2.5321112   |
| "D1Pas1"        | 2.6378412   | 2.7663057   | 2.7105618   | 2.8802686   | 2.7123237   | 2.6396096   | 2.691362    | 2.813796    |
| "D230025D16Rik" | 10.4555595  | 12.2167535  | 7.2417823   | 7.2323241   | 10.827834   | 12.01203    | 7.16365005  | 7.45057065  |
| "D2Ertdd127e"   | 2.2911687   | 2.354553    | 2.3260744   | 2.4307919   | 2.3331985   | 2.3117008   | 2.3262825   | 2.4026902   |
| "D2Ertdd239e"   | 2.417962    | 2.5278587   | 2.5021207   | 2.5981088   | 2.4654472   | 2.4201343   | 2.4927561   | 2.5697145   |
| "D2Ertdd63e"    | 2.79534425  | 3.10518585  | 2.8437674   | 2.97154415  | 2.85508595  | 2.8263925   | 2.83601825  | 2.9032596   |
| "D2Ertdd750e"   | 2.7998343   | 3.0188923   | 2.884456    | 3.0009184   | 2.889072    | 2.8533688   | 2.8861048   | 2.9315276   |
| "D2Ertdd93e"    | 2.9458039   | 3.2075844   | 3.2704551   | 3.9324074   | 3.0974646   | 3.1558747   | 3.367759    | 3.424584    |
| "D2hgdh"        | 3.4437716   | 3.697099    | 3.940377    | 3.7985315   | 3.8927443   | 3.236912    | 3.699749    | 3.7011507   |
| "D2Wsu81e"      | 3.7642424   | 3.777838    | 4.1147766   | 4.021041    | 3.9580235   | 3.9519117   | 3.9654238   | 4.102729    |
| "D3Bwg0562e"    | 2.3970428   | 2.472284    | 2.4444113   | 2.5284643   | 2.4333963   | 2.3780296   | 2.426961    | 2.5188751   |
| "D3Ertdd229e"   | 2.4285269   | 2.5431788   | 2.4687903   | 2.5700555   | 2.4802644   | 2.4415047   | 2.4687397   | 2.5548604   |
| "D3Ertdd246e"   | 2.8795497   | 2.9906094   | 2.9483502   | 3.128818    | 2.9489453   | 2.926413    | 2.935896    | 3.1298149   |
| "D4Ertdd117e"   | 2.7650993   | 2.92226075  | 2.85711212  | 2.86399725  | 2.8316089   | 2.74816885  | 2.78865325  | 2.8640442   |
| "D4Ertdd335e"   | 2.3219793   | 2.3832102   | 2.3625326   | 2.4528294   | 2.3617926   | 2.3153417   | 2.3523266   | 2.4508314   |
| "D4Ertdd58e"    | 2.8597598   | 3.1324084   | 3.0821965   | 3.1829941   | 2.9601424   | 2.8728812   | 2.9423242   | 3.089024    |
| "D4Wsu53e"      | 9.297558667 | 10.36453933 | 8.925395667 | 9.077910467 | 9.502599333 | 10.07210667 | 9.466755333 | 9.520070333 |
| "D530037H12Rik" | 5.3303776   | 5.450794    | 5.7894354   | 6.140411    | 5.9127555   | 6.2046275   | 6.1537204   | 6.21605     |
| "D5Ertdd102e"   | 2.3401253   | 2.4817564   | 2.372415    | 2.5231807   | 2.3803873   | 2.3361511   | 2.3710752   | 2.4729445   |
| "D630032N06Rik" | 2.2103863   | 2.2979612   | 2.519592    | 2.3285053   | 2.297957    | 2.2080278   | 2.3022747   | 2.3219488   |
| "D6Ertdd160e"   | 2.5398333   | 2.6703954   | 2.610625    | 2.733905    | 2.613251    | 2.5452063   | 2.5935178   | 2.732009    |
| "D6Wsu116e"     | 6.3122722   | 6.910018    | 6.17575575  | 6.079136    | 6.347994925 | 7.03898655  | 5.900674725 | 6.3375828   |
| "D6Wsu163e"     | 5.6880875   | 6.781045    | 5.999823    | 6.1229057   | 6.241241    | 6.080388    | 6.4154468   | 6.648009    |
| "D730039F16Rik" | 2.6917186   | 2.7919586   | 2.7137198   | 2.8324015   | 2.6575384   | 2.6828005   | 2.6448731   | 2.7909596   |
| "D7Bwg0826e"    | 2.5021007   | 2.597899    | 2.5729325   | 2.6610606   | 2.564934    | 2.4863224   | 2.532492    | 2.6464658   |
| "D7Ertdd128e"   | 2.3434823   | 2.3931475   | 2.372558    | 2.4492955   | 2.3746204   | 2.3562555   | 2.3743634   | 2.4408026   |
| "D7Ertdd183e"   | 6.25841     | 5.401239    | 3.8728743   | 3.6709156   | 5.190327    | 4.8788323   | 4.153324    | 4.4648185   |
| "D7Ertdd1e"     | 2.3367877   | 2.650913    | 2.5002878   | 2.4980543   | 2.4935002   | 2.3607242   | 2.3985403   | 2.4788556   |
| "D8Ertdd107e"   | 2.818861    | 2.904613    | 2.8399715   | 2.940167    | 2.8460317   | 2.7975173   | 2.8181248   | 2.902774    |
| "D8Ertdd28e"    | 2.4715781   | 2.5849507   | 2.5245183   | 2.6015997   | 2.5242999   | 2.510349    | 2.5141966   | 2.5791683   |
| "D8Ertdd67e"    | 2.5360594   | 2.6103263   | 2.5638018   | 2.6426015   | 2.5636249   | 2.5291655   | 2.561542    | 2.6589913   |
| "D8Ertdd738e"   | 7.87866685  | 7.93787195  | 7.69519775  | 7.98531175  | 7.82013565  | 7.843858    | 7.82559365  | 7.9742295   |
| "D930014E17Rik" | 7.73776     | 7.220896    | 7.0544195   | 7.4004116   | 7.0028343   | 7.448154    | 7.7290125   | 7.2024255   |
| "D930015E06Rik" | 5.330211    | 5.66021     | 4.3906775   | 4.657042    | 5.8090353   | 6.095438    | 5.0261006   | 4.818948    |
| "D930016D06Rik" | 5.66820875  | 7.36467425  | 5.89953395  | 5.96568295  | 6.31517575  | 7.16190065  | 5.9093313   | 5.9615109   |
| "D930048N14Rik" | 2.4818258   | 2.5426471   | 2.4987595   | 2.5901644   | 2.5058286   | 2.4516182   | 2.4783874   | 2.585398    |
| "D9Ertdd306e"   | 4.332024    | 4.200452    | 4.1689816   | 4.3465815   | 4.18049     | 4.1351523   | 4.375345    | 4.311142    |
| "Dab1"          | 2.47727075  | 2.5658675   | 2.520357325 | 2.638766475 | 2.5162096   | 2.472361625 | 2.54809445  | 2.609117625 |
| "Dab2"          | 4.715425433 | 4.5464902   | 5.615317033 | 5.390628233 | 4.994683933 | 5.1438936   | 5.347677967 | 5.501487667 |

|           |             |             |             |             |             |             |             |             |
|-----------|-------------|-------------|-------------|-------------|-------------|-------------|-------------|-------------|
| "Dab2ip"  | 7.671838    | 8.478861    | 7.8670187   | 8.011225    | 8.097411    | 8.100927    | 7.3098197   | 7.7424455   |
| "Dach1"   | 2.74575795  | 2.8567483   | 2.81345475  | 2.9240503   | 2.8166573   | 2.7806392   | 2.81096825  | 2.9100666   |
| "Dach2"   | 3.0906982   | 3.1438928   | 3.1105776   | 4.7195883   | 3.2424054   | 2.9466128   | 3.1170716   | 4.4021273   |
| "Dact1"   | 6.235094    | 5.330081    | 6.180374    | 6.284306    | 6.5775905   | 6.4765534   | 6.184466    | 6.8183904   |
| "Dad1"    | 9.859952    | 9.523628    | 9.81372     | 9.706634    | 9.577198    | 9.581347    | 9.9457155   | 9.636188    |
| "Daf2"    | 2.9262047   | 3.2782104   | 3.0506911   | 3.2333188   | 3.0709834   | 2.9530158   | 3.0523686   | 3.1542337   |
| "Dag1"    | 8.8667795   | 9.685860375 | 9.3052465   | 8.9486185   | 9.429051375 | 9.288387    | 9.050308    | 8.96538675  |
| "Daglb"   | 6.857068    | 6.542034    | 7.3443627   | 7.332473    | 6.9607162   | 6.5686564   | 6.922213    | 7.390893    |
| "Dalrd3"  | 5.2178082   | 4.9528837   | 4.947694    | 5.0453863   | 4.8639565   | 5.4901433   | 5.066235    | 5.004549    |
| "Dap"     | 9.233593    | 4.60464645  | 7.843905    | 6.101493    | 6.673144    | 6.7749727   | 7.3095155   | 6.63235865  |
| "Dap3"    | 9.080929    | 9.359022    | 9.437236    | 9.1228      | 9.227813    | 9.087719    | 9.33941     | 9.345435    |
| "Dapk1"   | 4.38009675  | 3.7657476   | 3.59272335  | 2.7154193   | 3.58145875  | 4.41508035  | 3.53670625  | 3.2443684   |
| "Dapk2"   | 5.147447    | 4.266448    | 6.363047    | 5.86481     | 5.5592785   | 4.836645    | 5.8033934   | 6.241737    |
| "Dapk3"   | 2.3593898   | 2.1823022   | 2.1257203   | 2.2071366   | 2.1347566   | 2.10101     | 2.5547585   | 2.1942163   |
| "Dapp1"   | 3.0809033   | 2.6023716   | 2.57799455  | 2.67073955  | 2.57738385  | 2.5738027   | 2.5726389   | 2.67692915  |
| "Darc"    | 4.4657865   | 5.2874584   | 6.2016745   | 5.1962485   | 5.6935835   | 6.0867066   | 5.342142    | 5.1395335   |
| "Dars"    | 9.5842285   | 9.618126    | 9.488686    | 9.714907    | 9.592747    | 9.420162    | 9.583205    | 9.823307    |
| "Daxx"    | 6.709705    | 7.816303    | 6.0644417   | 6.088913    | 6.8627243   | 7.5991983   | 6.213367    | 6.052804    |
| "Dazap1"  | 7.7204704   | 7.929847    | 7.3132925   | 7.6334023   | 8.069043    | 7.9001346   | 7.8544874   | 7.700104    |
| "Dazap2"  | 11.195907   | 11.366186   | 10.830659   | 10.741866   | 11.302866   | 11.353554   | 10.941854   | 10.796109   |
| "Dazl"    | 2.3854449   | 2.4820502   | 2.4013512   | 2.5888762   | 2.416425    | 2.3751938   | 2.4037497   | 2.5040822   |
| "Dbc1"    | 2.8301454   | 2.9429796   | 2.8948684   | 2.9995499   | 2.9146073   | 2.8227978   | 2.9022596   | 3.0557988   |
| "Dbf4"    | 2.686987    | 2.7343936   | 2.6670033   | 2.69476285  | 2.688585    | 3.1157408   | 2.63033425  | 2.73428565  |
| "Dbi"     | 11.093988   | 10.39807125 | 11.24893225 | 11.09854725 | 11.5632905  | 11.06205225 | 11.998904   | 11.36875675 |
| "Dbil5"   | 2.78380475  | 2.91847965  | 2.8111049   | 2.93141255  | 2.8173214   | 2.7834535   | 2.801846    | 2.91771135  |
| "Dbn1"    | 3.0741627   | 2.523948    | 2.80529     | 2.8705294   | 3.1344924   | 2.9844866   | 2.5062804   | 2.5640137   |
| "Dbndd2"  | 7.4588447   | 7.3652353   | 8.047266    | 7.6720924   | 7.710607    | 7.1534276   | 7.535039    | 7.669883    |
| "Dbnl"    | 3.6499717   | 3.18889     | 3.5455716   | 3.2921991   | 3.3963127   | 3.5020902   | 4.735959    | 3.0270033   |
| "Dbp"     | 4.842288    | 6.25904325  | 10.3435165  | 10.8025325  | 9.1900115   | 6.27670815  | 10.204346   | 10.627699   |
| "Dbr1"    | 5.5837073   | 6.28028     | 6.0259547   | 6.2131658   | 6.1896515   | 6.364707    | 5.9391465   | 6.478373    |
| "Dbt"     | 9.363806    | 9.171485    | 9.057088    | 8.871634    | 9.561557    | 9.699446    | 8.907885    | 9.106099    |
| "Dcaf11"  | 10.24217    | 10.5276525  | 10.3632485  | 10.4349195  | 10.137222   | 10.0739635  | 9.7427535   | 10.3350555  |
| "Dcaf12"  | 7.3325915   | 7.677718    | 7.524205    | 7.6126633   | 7.5184226   | 7.9236007   | 7.312307    | 7.697817    |
| "Dcaf13"  | 8.960991    | 9.334465    | 8.604233    | 8.545772    | 8.971591    | 9.283717    | 8.728563    | 8.505048    |
| "Dcaf15"  | 5.3373537   | 5.6369667   | 5.350346    | 5.4325566   | 5.2927403   | 5.493648    | 5.42641     | 5.4321647   |
| "Dcaf4"   | 7.049761    | 7.3144426   | 7.461567    | 7.488949    | 7.255662    | 6.2277765   | 7.8216796   | 7.547506    |
| "Dcaf8"   | 7.1226785   | 8.27179275  | 7.4895472   | 7.6812661   | 7.55060935  | 7.56551965  | 7.09992625  | 7.7017076   |
| "Dcadk"   | 2.2415967   | 2.2967017   | 2.296651    | 2.496434    | 2.3104398   | 2.2325435   | 2.573379    | 2.368445    |
| "Dcbld1"  | 3.1995771   | 2.6039057   | 2.5847378   | 2.7302154   | 2.62610315  | 2.88076555  | 2.75604055  | 2.71528975  |
| "Dck"     | 3.6667179   | 3.3827939   | 3.835113233 | 4.017840833 | 3.427748367 | 4.105177067 | 4.050502833 | 4.361343433 |
| "Dclk1"   | 4.69222288  | 3.21571744  | 3.80791338  | 3.56887602  | 3.1900217   | 3.27256872  | 5.20190304  | 3.67333138  |
| "Dclre1a" | 2.84869645  | 2.92491675  | 2.8862032   | 2.86263115  | 2.91127125  | 2.69177675  | 2.8082563   | 2.973811    |
| "Dclre1b" | 2.4075387   | 3.7207322   | 2.320803    | 2.4057386   | 2.384039    | 3.5479865   | 2.3099227   | 2.4069197   |
| "Dcn"     | 13.142763   | 13.322047   | 13.812034   | 13.419271   | 13.677475   | 13.788279   | 13.18612    | 13.454101   |
| "Dcp1a"   | 3.3589871   | 3.8800614   | 3.5061803   | 3.68777385  | 3.6839075   | 4.1542431   | 3.57825245  | 3.8609607   |
| "Dcpp1"   | 2.7007904   | 2.77791295  | 2.7353054   | 2.8507823   | 2.7386267   | 2.7033925   | 2.73389365  | 2.8160696   |
| "Dcps"    | 4.20473645  | 4.3026482   | 4.43689385  | 4.2013928   | 4.0616421   | 3.9172742   | 4.3811898   | 4.19567625  |
| "Dct"     | 4.5626187   | 1.9081963   | 1.8873576   | 1.9477438   | 1.8986189   | 1.8896085   | 1.903584    | 1.9504426   |
| "Dctn1"   | 7.52714435  | 7.962487    | 7.5046055   | 7.39352585  | 7.6651144   | 7.637995    | 7.843046    | 7.439725    |
| "Dctn2"   | 9.360043    | 9.310179    | 9.26642     | 9.0358715   | 9.290305    | 9.297515    | 9.367051    | 9.04934     |
| "Dctn3"   | 9.343912    | 9.2697525   | 9.144537    | 8.997849    | 9.378045    | 9.394064    | 9.485954    | 9.118248    |
| "Dctn4"   | 5.137828075 | 5.549475025 | 4.79138525  | 4.894076775 | 5.31111325  | 5.63601615  | 4.902543425 | 4.987813075 |
| "Dctn5"   | 6.803343    | 6.402194    | 6.624529    | 6.3831263   | 6.805412    | 6.6491346   | 6.8820376   | 6.5411515   |
| "Dctn6"   | 9.13483175  | 9.657354    | 9.7561875   | 9.8499285   | 9.511192    | 9.1471365   | 9.7828845   | 9.7619155   |
| "Dctpp1"  | 7.796618    | 7.6576962   | 8.182966    | 8.219327    | 7.7022815   | 6.954539    | 8.164077    | 8.130465    |
| "Dcun1d1" | 6.13397824  | 6.17163992  | 7.21710154  | 7.34498958  | 5.9858734   | 5.77086036  | 6.8826902   | 7.35109714  |
| "Dcun1d5" | 6.2237845   | 6.5777168   | 6.5559486   | 6.8227947   | 6.6252384   | 6.46241785  | 6.54763345  | 6.74258175  |
| "Dcxr"    | 7.2831926   | 6.088709    | 5.945346    | 5.5487003   | 6.402136    | 6.1605687   | 6.204693    | 5.841603    |
| "Dda1"    | 7.070275567 | 7.518188233 | 6.6897382   | 6.854847    | 6.851408767 | 7.2631802   | 6.8774662   | 6.742526667 |
| "Ddah2"   | 6.134055    | 5.684648    | 6.8681607   | 6.3580904   | 6.4557147   | 6.246487    | 6.293683    | 6.287654    |
| "Ddb1"    | 8.89768     | 9.8016815   | 8.590794    | 8.635178    | 9.116633    | 9.423967    | 8.797155    | 8.545195    |
| "Ddb2"    | 4.8544551   | 4.84626015  | 5.21273815  | 5.6496607   | 5.5268775   | 5.7975375   | 5.724906    | 5.8715117   |
| "Ddc"     | 6.689088    | 2.5718415   | 2.5266705   | 2.4706705   | 2.364668    | 2.3227227   | 3.6779058   | 2.5387497   |
| "Ddh1"    | 3.26409005  | 3.1058825   | 3.1795567   | 3.14878975  | 3.37203155  | 3.7186962   | 3.22760535  | 3.2276795   |
| "Ddh2"    | 7.2173443   | 7.2012935   | 7.8263636   | 7.917636    | 7.996757    | 7.8602223   | 8.43631     | 7.9954557   |
| "Ddi2"    | 10.026507   | 11.609139   | 7.7317953   | 7.365335    | 9.980218    | 10.385353   | 6.9571447   | 7.59998     |
| "Ddit3"   | 6.339814    | 5.3151603   | 6.9485006   | 7.341971    | 6.619789    | 5.924066    | 6.8978996   | 7.01076     |
| "Ddit4"   | 12.014027   | 12.932342   | 6.867595    | 8.072323    | 12.048609   | 13.098584   | 9.122326    | 8.34564     |
| "Ddit4l"  | 9.124172    | 9.7410415   | 11.060196   | 10.694331   | 11.473548   | 10.4964925  | 10.6664005  | 10.846708   |
| "Ddo"     | 5.230442    | 5.209411    | 5.431958    | 6.066039    | 5.051909    | 4.147236    | 5.8474584   | 6.1590824   |
| "Ddost"   | 5.2231308   | 5.10342565  | 5.5748701   | 5.32375875  | 5.27627735  | 5.1994002   | 5.54773685  | 5.32341285  |
| "Ddr1"    | 5.004687017 | 5.278178867 | 5.312351667 | 5.393249583 | 5.228845033 | 5.02613235  | 5.193098417 | 5.2902562   |
| "Ddr2"    | 3.2272387   | 3.1709085   | 3.391616    | 3.368998    | 3.352102    | 3.2648618   | 3.3371782   | 3.4005387   |
| "Ddrgk1"  | 9.97033     | 9.841444    | 9.944438    | 9.875623    | 9.739127    | 9.529107    | 10.2926     | 9.921237    |
| "Ddt"     | 10.327261   | 8.394979    | 8.6336      | 8.282705    | 9.225701    | 9.483456    | 9.354163    | 8.709027    |
| "Ddx1"    | 10.621202   | 11.068916   | 10.874319   | 10.741177   | 10.729593   | 10.610421   | 11.080893   | 10.859531   |
| "Ddx10"   | 6.1077795   | 6.682546    | 5.87781665  | 5.90719515  | 6.2812779   | 6.42996815  | 5.85099165  | 5.9532323   |
| "Ddx17"   | 7.877490667 | 8.158552267 | 8.0452675   | 7.691227333 | 7.852344367 | 8.106521967 | 7.926289233 | 7.885788    |
| "Ddx18"   | 7.6577555   | 8.500343    | 7.44618675  | 7.52129265  | 7.936529    | 8.160483    | 7.4804465   | 7.5037617   |
| "Ddx19a"  | 5.55104135  | 6.05018115  | 5.90711475  | 5.8975965   | 5.49086515  | 5.57657385  | 5.921839    | 5.5535728   |
| "Ddx19b"  | 4.030686    | 4.98707125  | 4.02242815  | 4.0756005   | 4.0368681   | 4.01864075  | 3.9765198   | 4.0999389   |

|             |             |             |             |             |             |             |             |             |
|-------------|-------------|-------------|-------------|-------------|-------------|-------------|-------------|-------------|
| "Ddx20"     | 7.447258    | 7.8084164   | 6.7833877   | 7.115433    | 7.4544153   | 7.3788996   | 7.255536    | 7.1843896   |
| "Ddx21"     | 7.39628785  | 7.997482    | 6.429285    | 6.71721915  | 7.50256275  | 8.03236     | 6.94399165  | 6.8219935   |
| "Ddx24"     | 8.636067    | 9.315335    | 8.233937    | 8.506391    | 8.780503    | 8.937503    | 8.46863     | 8.152051    |
| "Ddx25"     | 2.3788352   | 2.408845    | 2.3863761   | 2.4528322   | 2.3900454   | 2.371491    | 2.378004    | 2.4529247   |
| "Ddx26b"    | 6.5380435   | 6.7270527   | 7.4536543   | 7.416461    | 7.587425    | 7.6295347   | 7.770335    | 7.7131486   |
| "Ddx27"     | 7.1311173   | 7.6638384   | 5.591283    | 6.332714    | 6.6571608   | 7.312927    | 6.445732    | 5.9231596   |
| "Ddx39"     | 6.96794165  | 7.21384515  | 7.49031245  | 7.672634475 | 7.055043775 | 7.3503456   | 7.54104975  | 7.604418525 |
| "Ddx39b"    | 6.819938767 | 7.5230636   | 7.3463906   | 7.3528105   | 7.084153067 | 7.129736233 | 7.395974233 | 7.299640233 |
| "Ddx3x"     | 11.71238033 | 11.58948733 | 11.41081333 | 10.97912267 | 11.94335567 | 11.513248   | 11.34551967 | 11.08919533 |
| "Ddx3y"     | 2.781194133 | 10.02102983 | 3.042859167 | 9.666991167 | 3.033512867 | 9.919563333 | 2.966280333 | 9.706917333 |
| "Ddx4"      | 2.7393925   | 2.943983    | 2.7942097   | 2.9961617   | 2.8119404   | 2.7262626   | 2.7901492   | 2.9062955   |
| "Ddx41"     | 3.5039177   | 3.3237062   | 3.3897583   | 3.4067702   | 3.3950422   | 3.898834    | 3.3659673   | 3.8288357   |
| "Ddx42"     | 6.837034    | 7.3725834   | 7.053025    | 7.1941524   | 7.402542    | 7.6659923   | 6.9477873   | 7.132787    |
| "Ddx46"     | 4.9284211   | 5.497861367 | 5.026004167 | 5.103649933 | 5.4802451   | 5.4370549   | 5.0201432   | 4.8976081   |
| "Ddx47"     | 4.658408567 | 4.9318986   | 4.5550214   | 4.679046    | 4.776997    | 4.752664767 | 4.5922602   | 4.599259567 |
| "Ddx49"     | 4.68927475  | 4.9091054   | 4.758984    | 4.7541113   | 4.7467632   | 4.90782825  | 4.74974675  | 4.62525295  |
| "Ddx5"      | 9.70051642  | 10.32431474 | 9.61850848  | 9.91622908  | 9.76986958  | 9.8304641   | 9.74930326  | 9.89290352  |
| "Ddx50"     | 9.814713    | 10.006992   | 9.870256    | 9.802585    | 9.884843    | 9.94603     | 9.982682    | 9.888761    |
| "Ddx51"     | 5.04264     | 5.572969    | 5.911452    | 5.785575    | 5.78383     | 5.3583264   | 5.473353    | 5.733191    |
| "Ddx52"     | 6.7556028   | 7.49278855  | 6.4337247   | 6.8182117   | 6.96508335  | 6.9049585   | 6.55500285  | 6.900473    |
| "Ddx54"     | 7.903695    | 7.8337187   | 7.1890445   | 7.4362187   | 7.5859303   | 8.0335027   | 7.4619393   | 7.4346972   |
| "Ddx56"     | 6.6498914   | 7.1069455   | 5.4669437   | 6.2881255   | 7.1768217   | 7.4236574   | 5.352504    | 6.2704377   |
| "Ddx59"     | 5.5984416   | 6.5390024   | 6.279996    | 6.903058    | 6.0305433   | 5.7416286   | 6.391402    | 6.7084455   |
| "Ddx6"      | 8.883569867 | 9.171779667 | 9.377645667 | 9.4940915   | 9.161447    | 9.385776    | 9.402707833 | 9.450772667 |
| "Ddx60"     | 2.9017184   | 2.9169242   | 2.8217924   | 2.986489    | 2.8227546   | 2.652413    | 3.1933642   | 3.5877676   |
| "Deaf1"     | 3.0523593   | 2.8616266   | 3.8484337   | 3.963606    | 2.8655257   | 3.0440533   | 3.525717    | 3.1027768   |
| "Deb1"      | 10.777356   | 10.637884   | 11.090142   | 11.26209    | 10.637526   | 10.156332   | 11.266638   | 11.1508045  |
| "Decr1"     | 8.873205    | 8.8232525   | 9.264197    | 9.4910085   | 9.7096945   | 9.156419    | 9.42148875  | 9.747478    |
| "Decr2"     | 5.1541157   | 2.6356854   | 2.7202878   | 2.782474    | 2.7171454   | 2.623486    | 2.6716375   | 2.9184098   |
| "Dedd"      | 5.891015367 | 6.626142633 | 5.982781233 | 6.3504848   | 6.2535021   | 6.132172567 | 6.2991309   | 6.355746667 |
| "Dedd2"     | 5.5160875   | 5.1753316   | 3.8985596   | 3.867591    | 5.1326675   | 4.903012    | 3.9422796   | 4.1428494   |
| "Def8"      | 4.8331766   | 5.0750074   | 5.294144    | 5.314635    | 4.297684    | 4.3200097   | 5.3318796   | 5.1245117   |
| "Defa-rs1"  | 2.9928303   | 3.1662853   | 3.1061037   | 3.3285382   | 3.103974    | 3.027034    | 3.1009266   | 3.2151234   |
| "Defa-rs10" | 2.5124578   | 2.8275774   | 2.5116904   | 2.5490398   | 2.517818    | 2.4966269   | 2.5105674   | 2.5356157   |
| "Defa-rs12" | 2.7210352   | 2.782475    | 2.7401297   | 2.8718534   | 2.7198915   | 2.7160892   | 2.7439573   | 2.8316996   |
| "Defa-rs2"  | 2.2208889   | 2.884459    | 2.2699566   | 2.3103888   | 2.2763865   | 2.2696917   | 2.2765534   | 2.3120232   |
| "Defa-rs7"  | 2.346354    | 2.439248    | 2.4129066   | 2.5023475   | 2.455806    | 2.37545     | 2.408422    | 2.4878347   |
| "Defa1"     | 3.235242    | 3.6225445   | 3.4101157   | 3.6377642   | 3.4270844   | 3.2965586   | 3.4190881   | 3.5481346   |
| "Defa3"     | 2.3789532   | 2.4679298   | 2.4083068   | 2.5185838   | 2.412101    | 2.3643441   | 2.4075756   | 2.4990897   |
| "Defa4"     | 2.8707995   | 3.0728955   | 2.9560726   | 3.0606766   | 2.9650128   | 2.9127333   | 2.9551854   | 3.04005     |
| "Defa5"     | 2.4182506   | 2.5357425   | 2.476552    | 2.5930083   | 2.4770198   | 2.407991    | 2.4639115   | 2.578905    |
| "Defb1"     | 2.45343875  | 2.35949615  | 2.49600075  | 2.38807935  | 2.29711485  | 2.26863145  | 2.3021691   | 2.3878583   |
| "Defb11"    | 2.3448048   | 2.4222567   | 2.3815684   | 2.49158     | 2.3941767   | 2.3208141   | 2.3758616   | 2.4870398   |
| "Defb15"    | 2.969097    | 3.1344054   | 3.0694983   | 3.1662333   | 3.0710278   | 3.0355911   | 3.0661683   | 3.1481957   |
| "Defb2"     | 2.4381473   | 2.5339756   | 2.4578488   | 2.5883112   | 2.571074    | 2.8191278   | 2.474225    | 2.5818033   |
| "Defb3"     | 2.8269925   | 2.9911284   | 2.8973296   | 3.1184816   | 2.8972666   | 2.8123233   | 2.8994796   | 3.020039    |
| "Defb4"     | 2.7575665   | 2.9654195   | 2.8446589   | 3.0189483   | 2.8567507   | 2.7717605   | 2.8394558   | 2.9756317   |
| "Defb5"     | 2.6091657   | 2.8280637   | 2.6713078   | 2.7942703   | 2.6799595   | 2.6313596   | 2.66774     | 2.792226    |
| "Defb6"     | 2.583668    | 2.6364324   | 4.9132137   | 2.7003412   | 2.5475206   | 2.5290585   | 2.591781    | 2.6777883   |
| "Defb7"     | 2.712255    | 2.8372955   | 2.7380807   | 2.9052513   | 2.7544699   | 2.6919236   | 2.7409697   | 2.8693733   |
| "Defb8"     | 2.2807472   | 2.414834    | 2.3234758   | 2.436495    | 2.3288398   | 2.3067663   | 2.3186326   | 2.4145339   |
| "Defb9"     | 2.7862358   | 2.8795145   | 2.817283    | 3.049367    | 2.8293378   | 2.7636714   | 2.8195536   | 2.9549913   |
| "Degs1"     | 8.60241425  | 7.7809375   | 8.48050865  | 8.351451    | 8.5612075   | 8.306701    | 8.58194115  | 8.45972635  |
| "Dek"       | 10.774355   | 11.229126   | 10.752018   | 10.883283   | 11.150934   | 11.139748   | 10.8357935  | 10.98446    |
| "Dennd1a"   | 6.5993347   | 7.324036    | 6.6761613   | 6.775989    | 6.7937245   | 6.6681004   | 6.8716693   | 6.8149433   |
| "Dennd2d"   | 2.5680082   | 2.8468142   | 2.7342112   | 2.9114935   | 2.8352277   | 4.672121    | 2.8551002   | 2.8756201   |
| "Dennd4b"   | 8.430802    | 9.301533    | 9.56983     | 9.8102455   | 9.062948    | 8.731588    | 8.984945    | 9.589822    |
| "Dennd4c"   | 8.746675    | 9.006051    | 9.103302    | 9.271634    | 9.251772    | 9.665317    | 8.980477    | 9.32301     |
| "Dennd5a"   | 9.735391    | 9.314198    | 9.642636    | 9.501439    | 9.767974    | 9.733232    | 9.988392    | 9.604777    |
| "Denr"      | 6.7128368   | 6.81262575  | 7.268766    | 7.2788015   | 6.42334485  | 6.45573605  | 7.0595795   | 7.5273205   |
| "Dep1"      | 2.4999754   | 2.5881987   | 2.5431023   | 2.6481931   | 2.546014    | 2.5078876   | 2.5459073   | 2.6513422   |
| "Depdc1a"   | 2.747293    | 2.9497263   | 2.844783    | 3.0167532   | 2.8466713   | 2.79042     | 2.8293118   | 2.9598575   |
| "Depdc7"    | 3.7379656   | 2.4040253   | 2.9913676   | 3.0546577   | 3.089041    | 4.260213    | 4.4707794   | 3.0848787   |
| "Deptor"    | 8.115446667 | 8.127405667 | 8.562308333 | 8.480178233 | 8.2641901   | 7.583875433 | 8.577696    | 8.588754433 |
| "Dera"      | 6.7357984   | 6.1124954   | 6.1476793   | 6.6828356   | 6.014921    | 5.909519    | 6.5072303   | 6.4401994   |
| "Derl1"     | 8.654546    | 8.55457765  | 8.502852925 | 8.29483     | 8.600360875 | 8.393429675 | 9.014960375 | 8.469968625 |
| "Derl2"     | 6.955286    | 6.14775535  | 6.584867    | 6.73707335  | 6.4090988   | 6.69492     | 6.85938585  | 6.79711185  |
| "Derl3"     | 2.233943    | 2.4155476   | 2.2590754   | 2.2848518   | 2.261818    | 2.340491    | 2.1839793   | 2.2854135   |
| "Des"       | 8.0313773   | 8.0621243   | 7.70381625  | 7.6643119   | 7.6754635   | 7.5175886   | 8.10853935  | 7.54885755  |
| "Dexi"      | 7.5295715   | 7.238998    | 7.967368    | 8.419496    | 7.788539    | 6.810647    | 7.9722357   | 7.9994545   |
| "Dffa"      | 7.6768513   | 7.427108    | 7.5927577   | 8.052513    | 7.892658    | 7.0039287   | 7.461288    | 7.9880705   |
| "Dffb"      | 3.075271    | 2.99964465  | 3.02354695  | 3.17300605  | 2.97428545  | 2.9676224   | 3.0733211   | 3.2858331   |
| "Dfna5"     | 7.581707    | 8.568776    | 9.045367    | 9.443152    | 7.952962    | 8.176604    | 8.909911    | 9.109384    |
| "Dgat1"     | 5.840915    | 5.8958783   | 6.5059295   | 5.4549265   | 7.4715233   | 8.505876    | 7.9542265   | 6.010733    |
| "Dgat2"     | 6.9327364   | 5.2138628   | 6.27965515  | 6.09388035  | 7.23887515  | 5.9312694   | 8.68926815  | 6.73729085  |
| "Dgcr14"    | 2.34019885  | 2.9913195   | 2.24861595  | 2.3244649   | 2.55671625  | 2.4225054   | 2.3462834   | 2.39270975  |
| "Dgcr2"     | 4.1008245   | 4.171465767 | 4.362493333 | 4.2528881   | 4.259289    | 4.1834118   | 4.030145933 | 4.047063133 |
| "Dgcr6"     | 6.101057033 | 6.2900991   | 6.088386667 | 6.267955167 | 5.759557633 | 5.6041376   | 6.4163922   | 6.053985767 |
| "Dgcr8"     | 2.4665854   | 2.5211139   | 2.4870555   | 2.5829415   | 2.4776103   | 2.4683433   | 2.4783232   | 2.5713913   |
| "Dgka"      | 5.969926    | 6.7135496   | 6.363016    | 5.8869033   | 6.564453    | 7.722638    | 6.1898365   | 5.7254353   |
| "Dgke"      | 2.4968987   | 2.805468    | 2.5067217   | 2.5919058   | 2.5780847   | 2.4842813   | 2.5284317   | 2.5306766   |

|          |             |             |             |             |             |             |             |             |
|----------|-------------|-------------|-------------|-------------|-------------|-------------|-------------|-------------|
| "Dgkq"   | 2.2862005   | 2.6420238   | 2.4763532   | 2.5658257   | 2.4800057   | 2.462958    | 2.4720702   | 2.540877    |
| "Dgkz"   | 7.924616    | 8.357825    | 8.77035375  | 8.5672303   | 8.5917382   | 7.82801825  | 8.370688    | 8.57610725  |
| "Dguok"  | 7.01335     | 7.017787    | 7.6148057   | 7.6928406   | 7.281663    | 7.340699    | 7.545498    | 7.621515    |
| "Dhcr24" | 7.201019    | 3.21044675  | 4.41972315  | 3.25959655  | 3.2435362   | 3.05487585  | 3.2081636   | 3.2618146   |
| "Dhcr7"  | 4.158716    | 2.6336195   | 3.5085468   | 3.606596    | 3.507716    | 3.1402698   | 3.5074759   | 3.5623338   |
| "Dhdds"  | 3.72965945  | 3.7894129   | 3.7662076   | 3.82955665  | 3.75765985  | 3.9576025   | 3.79101705  | 3.8386105   |
| "Dhfr"   | 4.498107    | 3.7240293   | 4.1283803   | 3.9978795   | 3.9309154   | 3.307118    | 3.5889447   | 4.632052    |
| "Dhh"    | 3.178171    | 3.2699027   | 3.5019734   | 3.2744641   | 3.655514    | 3.2222064   | 3.217779    | 3.2740781   |
| "Dhodh"  | 3.8742324   | 4.0936917   | 4.22010665  | 4.97636565  | 4.23151945  | 3.8659395   | 4.3594115   | 4.6335913   |
| "Dhps"   | 6.48421685  | 7.2923358   | 6.92233     | 6.80969135  | 6.4611685   | 6.40349365  | 7.214772    | 7.1222379   |
| "Dhrs1"  | 7.8938427   | 7.5906405   | 7.8802156   | 8.184673    | 7.637977    | 7.1143656   | 7.507778    | 7.8969812   |
| "Dhrs11" | 4.2949634   | 4.436303    | 4.2948036   | 5.2383833   | 4.757588    | 4.1316657   | 4.3981524   | 5.055907    |
| "Dhrs3"  | 8.169171    | 7.764121    | 7.3082485   | 6.325046    | 7.9586425   | 7.481641    | 7.1565347   | 7.662541    |
| "Dhrs4"  | 7.5425083   | 5.976045    | 6.50461835  | 6.85136625  | 7.044564    | 6.74908065  | 6.99685405  | 7.4440616   |
| "Dhrs7"  | 7.100199    | 6.553908    | 7.7570953   | 7.2817955   | 7.850594    | 6.620467    | 8.248685    | 7.447657    |
| "Dhrs7b" | 7.6455746   | 7.888216    | 8.018318    | 8.158813    | 7.966887    | 7.5257607   | 8.180933    | 7.8939905   |
| "Dhx15"  | 10.66178    | 11.2900025  | 10.2378655  | 10.4069665  | 10.81037    | 11.0890225  | 10.443323   | 10.4286945  |
| "Dhx16"  | 7.1462717   | 7.070505    | 7.030817    | 7.2565374   | 7.0871544   | 7.2299676   | 7.73875     | 7.4473414   |
| "Dhx30"  | 7.114108125 | 7.6280611   | 7.347232525 | 7.374701925 | 7.39371345  | 7.5223069   | 7.1993156   | 7.372278875 |
| "Dhx32"  | 7.9431396   | 8.214745    | 8.677608    | 8.68756     | 8.31243     | 8.157346    | 8.6338215   | 8.340419    |
| "Dhx36"  | 8.25098425  | 8.5354095   | 7.9414595   | 8.09185315  | 8.3243222   | 7.74445815  | 8.0932686   | 8.2095865   |
| "Dhx38"  | 3.418964    | 4.080469    | 3.1229463   | 2.9699435   | 3.1907854   | 3.1823766   | 3.1793747   | 3.2209816   |
| "Dhx40"  | 8.4204      | 9.033483    | 7.9321156   | 7.7814136   | 8.457384    | 8.71967     | 8.117038    | 7.947078    |
| "Dhx57"  | 5.380451    | 5.5823727   | 5.422027    | 5.523456    | 5.4799504   | 5.562073    | 5.3822627   | 5.5616364   |
| "Dhx58"  | 2.391796    | 2.443383    | 2.4067538   | 2.5003391   | 2.4013338   | 2.3608719   | 2.85188055  | 2.4844867   |
| "Dhx8"   | 4.935178    | 6.1902604   | 4.739774    | 4.3212504   | 5.540209    | 6.1372795   | 4.171819    | 4.885338    |
| "Dhx9"   | 7.9040725   | 7.9853223   | 7.7372275   | 8.01347135  | 7.6152112   | 8.04360665  | 7.96927775  | 7.991878    |
| "Diablo" | 6.6641635   | 7.0464777   | 6.835069    | 6.87820025  | 6.8745663   | 7.1012245   | 6.9283945   | 6.8530537   |
| "Diap1"  | 7.280552    | 8.0561537   | 6.37327     | 6.90519635  | 7.1830105   | 7.57826135  | 6.6973875   | 6.534493    |
| "Diap2"  | 6.0889673   | 5.6051717   | 5.3484354   | 4.9747605   | 6.155281    | 6.4322805   | 5.9064684   | 5.94668     |
| "Diap3"  | 2.9908676   | 3.0666068   | 3.0210757   | 3.1820257   | 3.024481    | 2.9358554   | 3.1445022   | 3.113685    |
| "Dicer1" | 6.81809135  | 6.99339435  | 7.30274725  | 7.4659176   | 6.99166295  | 6.9722106   | 7.275376    | 7.3714625   |
| "Dido1"  | 7.3625402   | 7.829513    | 7.144941    | 7.025407    | 7.133878    | 8.482496    | 7.480081    | 7.0480237   |
| "Diexf"  | 5.8057337   | 6.7538233   | 4.8360515   | 4.892571    | 5.8805304   | 6.558407    | 5.098697    | 4.8938885   |
| "Dimt1"  | 4.9300549   | 5.8136275   | 4.86495045  | 4.8297641   | 5.01104155  | 5.02283395  | 4.61956905  | 4.85831535  |
| "Dio1"   | 4.715036    | 2.3608062   | 2.3193495   | 2.418772    | 2.3225086   | 2.282919    | 2.3167892   | 2.4004908   |
| "Dio2"   | 3.2525203   | 3.0763881   | 3.063491    | 3.372942    | 2.8314173   | 2.7857983   | 3.474982    | 3.1658397   |
| "Dip2b"  | 6.810406    | 7.1643457   | 6.8746047   | 6.7714496   | 7.5132236   | 7.604352    | 7.0787473   | 7.0924783   |
| "Diras1" | 2.2791452   | 2.3610559   | 2.324145    | 2.4442306   | 2.3385973   | 2.3119817   | 2.3297315   | 2.4218633   |
| "Dis3"   | 6.8145905   | 7.264456    | 6.62344     | 6.362559    | 6.8023567   | 6.7499123   | 7.0698028   | 6.250111    |
| "Dixdc1" | 2.3102608   | 2.367383    | 2.348714    | 2.4508307   | 2.3537176   | 2.3403597   | 2.347776    | 2.4208734   |
| "Dkk2"   | 3.9946957   | 4.9600906   | 5.9972577   | 5.0900087   | 4.5976067   | 5.5089493   | 3.4469216   | 5.8236265   |
| "Dkk3"   | 2.6499523   | 2.6328823   | 3.19413005  | 2.67562305  | 2.62018285  | 2.78281245  | 2.6960561   | 2.6931174   |
| "Dkl1"   | 2.5392964   | 2.6008527   | 2.5770504   | 2.6616454   | 2.5315137   | 2.5527172   | 2.5221539   | 2.6142058   |
| "Dlat"   | 9.063059333 | 8.695169833 | 9.816447333 | 10.34886333 | 9.731645333 | 9.025928667 | 9.658845667 | 10.38054133 |
| "Dlc1"   | 2.253294    | 2.0652103   | 2.2799518   | 2.218679    | 2.3509905   | 2.2845898   | 2.7016666   | 2.331501    |
| "Dld"    | 10.607699   | 10.849038   | 10.927602   | 11.431953   | 11.079529   | 10.712442   | 10.69754    | 11.361059   |
| "Dleu2"  | 6.42420185  | 4.65409325  | 5.6278057   | 5.7905188   | 5.711618    | 5.83470875  | 6.1990786   | 6.1912995   |
| "Dlg1"   | 8.1210749   | 8.5359247   | 8.2017183   | 8.30624025  | 8.1175995   | 8.4423402   | 8.20933335  | 8.43200035  |
| "Dlg2"   | 2.71415365  | 2.83233795  | 2.7603776   | 2.8866135   | 2.871381    | 2.716481    | 2.7566633   | 2.8819734   |
| "Dlg3"   | 3.2795115   | 2.9373546   | 2.9298353   | 2.9335139   | 3.0565834   | 2.836718    | 2.9227962   | 2.9808662   |
| "Dlgs"   | 3.7203677   | 4.427454    | 2.7048383   | 2.8945298   | 2.893804    | 3.632234    | 2.9252353   | 2.872078    |
| "Dlgap4" | 8.068012    | 8.581223    | 8.142636    | 8.239287    | 8.1899808   | 8.023956    | 8.427443    | 7.9323807   |
| "Dlk2"   | 2.8692224   | 2.9884255   | 2.925431    | 3.0442693   | 2.923999    | 2.901132    | 2.9206922   | 3.037615    |
| "Dll1"   | 3.6611755   | 2.899741    | 2.805358    | 3.065316    | 2.9289742   | 3.3980126   | 4.297063    | 3.0232735   |
| "Dll3"   | 2.3684788   | 2.485953    | 2.4096298   | 2.511477    | 2.4387927   | 2.452231    | 2.4244401   | 2.504506    |
| "Dll4"   | 2.3522719   | 2.4432162   | 2.3962969   | 2.5542269   | 2.4020406   | 2.3670502   | 2.6963865   | 2.52984865  |
| "Dist"   | 7.5361585   | 7.5130788   | 7.5867145   | 7.6743075   | 7.7112923   | 7.569781    | 7.37944575  | 7.7658746   |
| "Dlx1"   | 2.3064365   | 2.3834343   | 2.3374496   | 2.4512641   | 2.3421366   | 2.295649    | 2.3451884   | 2.4245539   |
| "Dlx1as" | 2.5426512   | 2.751478    | 2.5800822   | 2.6944795   | 2.583083    | 2.5282557   | 2.5792704   | 2.6775594   |
| "Dlx2"   | 2.5768561   | 2.6645422   | 2.5896401   | 2.6929855   | 2.6141303   | 2.609776    | 2.6241448   | 2.6673572   |
| "Dlx3"   | 2.2238536   | 2.3878722   | 2.3765647   | 2.4485834   | 2.3845122   | 2.3603885   | 2.3582313   | 2.4466808   |
| "Dmap1"  | 6.636863    | 7.700991    | 7.1458964   | 7.0341043   | 6.869177    | 6.8892746   | 7.0315547   | 7.1049447   |
| "Dmbx1"  | 2.812769    | 2.946272    | 2.9381595   | 3.034054    | 2.9403763   | 2.9227657   | 2.9211109   | 2.9825842   |
| "Dmc1"   | 2.612856    | 2.7261639   | 2.6626058   | 2.9474833   | 2.708705    | 2.6207628   | 2.6638398   | 2.7770677   |
| "Dmd"    | 7.423605    | 7.4605097   | 7.407362967 | 7.410718067 | 7.409388333 | 7.030784867 | 7.330989833 | 7.592043833 |
| "Dmgdh"  | 7.7789164   | 2.817882    | 3.1723077   | 2.8799858   | 2.7835898   | 2.7280488   | 2.7659674   | 2.9097352   |
| "Dmkn"   | 6.468942    | 2.0669742   | 8.279995    | 2.799958    | 2.0385854   | 2.0113938   | 2.024026    | 2.1150527   |
| "Dmp1"   | 2.7533357   | 2.9402127   | 2.835253    | 3.0056877   | 2.844392    | 2.8072398   | 2.8296878   | 2.9760132   |
| "Dmpk"   | 8.646028    | 7.3157415   | 8.39351     | 8.749601    | 8.035201    | 7.4322424   | 9.129181    | 8.683117    |
| "Dmrt1"  | 2.7991052   | 2.9491706   | 2.8924792   | 3.0153196   | 2.8977633   | 2.8145804   | 2.895668    | 2.9783807   |
| "Dmrt2"  | 2.6609354   | 3.3638546   | 4.690071    | 3.408506    | 4.3964806   | 4.4166903   | 4.2814655   | 3.8206425   |
| "Dmrtb1" | 2.2176025   | 2.424737    | 2.3769639   | 2.4974174   | 2.3861146   | 2.344374    | 2.3867836   | 2.520275    |
| "Dmtf1"  | 4.448610833 | 4.8742334   | 4.5969549   | 4.7173207   | 4.715435533 | 4.8083333   | 4.6338573   | 4.7198475   |
| "Dmx11"  | 7.3839464   | 7.8598843   | 8.551993    | 9.123705    | 8.307003    | 7.6644373   | 8.151073    | 9.227724    |
| "Dna2"   | 2.9300277   | 2.6184037   | 2.709158    | 2.8056433   | 2.774631    | 3.0050178   | 2.8146763   | 2.7074194   |
| "Dnaja1" | 8.26798075  | 7.8255287   | 8.6624685   | 8.3684295   | 8.5790369   | 8.8494025   | 8.868457    | 8.40326285  |
| "Dnaja2" | 8.8819057   | 9.9625285   | 9.128197    | 9.40089675  | 9.4034785   | 9.55196775  | 8.4556513   | 9.3386195   |
| "Dnaja3" | 6.411714733 | 6.3672531   | 6.4126347   | 6.705792067 | 6.389008267 | 6.091535767 | 6.397824167 | 6.461224533 |
| "Dnaja4" | 8.395899233 | 7.621872667 | 7.775362033 | 8.166017667 | 8.415438667 | 8.088359    | 8.622686333 | 8.10545     |
| "Dnajb1" | 6.24770725  | 5.55891085  | 5.8584433   | 5.48570705  | 5.93589115  | 6.5003452   | 6.34401935  | 5.6413953   |

|            |             |             |             |             |             |             |             |             |
|------------|-------------|-------------|-------------|-------------|-------------|-------------|-------------|-------------|
| "Dnajb11"  | 7.663689    | 7.6892138   | 7.711681    | 7.5816784   | 7.638774    | 7.683537    | 7.54739     | 7.499213    |
| "Dnajb12"  | 4.8798398   | 5.24551125  | 5.06714225  | 5.0594298   | 4.81762195  | 4.889813    | 5.1980425   | 4.8795381   |
| "Dnajb2"   | 8.003882    | 8.325979    | 7.9641848   | 7.9218183   | 7.895692    | 9.152547    | 7.953558    | 8.216366    |
| "Dnajb4"   | 9.5362405   | 7.9664785   | 9.0196965   | 9.1977515   | 9.1214993   | 8.48509     | 9.3676705   | 9.2669735   |
| "Dnajb5"   | 6.232357367 | 7.107818567 | 6.828216067 | 7.0183873   | 6.274764467 | 5.835698833 | 6.110184333 | 6.949504933 |
| "Dnajb6"   | 7.6650604   | 8.276384975 | 6.38101435  | 6.76431445  | 7.266244425 | 8.106346975 | 6.599109475 | 6.7321391   |
| "Dnajb7"   | 2.656963    | 2.7872045   | 2.7055602   | 2.8335562   | 2.7126718   | 2.641755    | 2.7029588   | 2.811492    |
| "Dnajb9"   | 10.5601635  | 11.24321    | 9.8053      | 10.006882   | 10.834818   | 11.552286   | 9.712578    | 10.149836   |
| "Dnajc1"   | 6.5826228   | 6.42632035  | 6.03586685  | 5.7919355   | 6.3629681   | 6.8560519   | 6.34919815  | 5.90648235  |
| "Dnajc10"  | 6.659805233 | 6.791863033 | 7.027312933 | 6.936800267 | 6.8031438   | 6.771910767 | 6.856380567 | 7.000166067 |
| "Dnajc11"  | 5.25425375  | 5.1629126   | 5.31344805  | 5.4532248   | 5.27273775  | 5.098458    | 5.21509465  | 5.5138874   |
| "Dnajc12"  | 8.087844    | 7.4749694   | 8.649476    | 8.56782     | 7.795073    | 6.463686    | 8.639978    | 8.192281    |
| "Dnajc13"  | 8.09532     | 8.149114    | 8.027204    | 8.03062     | 8.106039    | 8.088439    | 8.455043    | 8.122128    |
| "Dnajc14"  | 5.619305667 | 5.7578328   | 5.786648533 | 5.879004167 | 5.755238333 | 5.532879333 | 6.014825767 | 6.111569    |
| "Dnajc15"  | 10.69974    | 10.658682   | 10.949163   | 11.263109   | 10.768948   | 10.483958   | 11.388593   | 10.999293   |
| "Dnajc17"  | 3.489781    | 3.6372068   | 3.630417    | 3.682157    | 3.627815    | 3.6112921   | 3.6251032   | 3.6848216   |
| "Dnajc18"  | 3.87451925  | 3.6873733   | 3.8881278   | 4.1919798   | 3.71820425  | 3.87000335  | 4.0142542   | 4.003999    |
| "Dnajc19"  | 6.61436225  | 6.715429    | 7.1053588   | 7.46415075  | 6.7433281   | 6.4006507   | 6.91597545  | 7.02173505  |
| "Dnajc2"   | 7.050991733 | 7.245738733 | 7.059537    | 7.164167433 | 6.9961503   | 6.9428189   | 7.3911004   | 7.021401733 |
| "Dnajc21"  | 9.982522    | 10.508872   | 10.426766   | 10.859228   | 9.959069    | 9.898825    | 10.603044   | 10.891731   |
| "Dnajc24"  | 4.023558    | 4.1497924   | 4.18241215  | 4.3637675   | 4.344629    | 4.21003865  | 4.5569465   | 4.4408748   |
| "Dnajc27"  | 5.8303756   | 6.23513155  | 6.0680939   | 6.6667011   | 5.90328535  | 5.9113665   | 6.22258455  | 6.6224025   |
| "Dnajc28"  | 4.63571525  | 4.96356485  | 4.68289015  | 4.9577853   | 4.95930765  | 4.59942385  | 4.79586885  | 4.91224465  |
| "Dnajc3"   | 7.26731348  | 6.59830492  | 7.0348334   | 7.09201932  | 6.8493779   | 7.11355754  | 6.8031857   | 7.07858146  |
| "Dnajc30"  | 8.283552    | 8.399723    | 8.125984    | 8.33455     | 8.165564    | 7.997865    | 8.130241    | 7.8570733   |
| "Dnajc4"   | 7.4442286   | 8.121018    | 8.475313    | 8.653328    | 8.09118     | 7.5611634   | 8.157943    | 8.230924    |
| "Dnajc5"   | 6.9371239   | 7.03875696  | 6.73799964  | 6.87512624  | 6.90303262  | 6.84903052  | 6.9750013   | 6.77555718  |
| "Dnajc5b"  | 2.372724    | 2.4083147   | 2.3944786   | 2.4474483   | 2.4161315   | 2.3664768   | 2.401165    | 2.4774904   |
| "Dnajc7"   | 8.710049    | 9.049177    | 9.003017    | 9.18383     | 8.8197155   | 9.110802    | 8.87199     | 9.03746     |
| "Dnajc8"   | 8.783071    | 9.274507    | 9.247286    | 9.019514    | 9.217213    | 9.466148    | 8.980046    | 8.812154    |
| "Dnajc9"   | 7.4091153   | 7.633954    | 8.009293    | 8.027996    | 7.385715    | 7.3432765   | 7.826663    | 8.037698    |
| "Dnalc4"   | 3.9571462   | 4.6634555   | 3.9547348   | 3.989106    | 4.13699     | 3.8645437   | 3.9483237   | 3.9853196   |
| "Dnase111" | 9.2789955   | 9.687792    | 10.134459   | 10.013102   | 9.461666    | 9.549482    | 9.548505    | 10.059282   |
| "Dnase2a"  | 7.13085     | 5.757314    | 5.7786803   | 5.21802     | 6.755013    | 6.4835634   | 5.8229694   | 5.8818316   |
| "Dnase2b"  | 2.5146925   | 2.3982334   | 2.356761    | 2.4590657   | 2.372661    | 2.3296623   | 2.358567    | 2.4327157   |
| "Dnd1"     | 2.869221    | 3.0205946   | 3.0039015   | 3.211272    | 3.02476     | 2.9032977   | 3.0165942   | 3.1283262   |
| "Dner"     | 2.5916767   | 2.733244    | 2.6537738   | 2.7969904   | 2.6853914   | 2.5997343   | 2.6511798   | 2.7729802   |
| "Dnlz"     | 6.735701    | 7.033903    | 7.0008683   | 6.8037825   | 6.9228687   | 6.642308    | 7.331145    | 7.1489086   |
| "Dnm1"     | 2.8587162   | 1.8403656   | 4.881734    | 3.638045    | 3.3203087   | 3.2008028   | 3.4984725   | 3.9001462   |
| "Dnm11"    | 5.4763609   | 5.8150444   | 5.765373    | 5.914768925 | 5.6832865   | 5.547077175 | 5.64778755  | 5.870824775 |
| "Dnm2"     | 3.275062    | 3.3791806   | 3.2935825   | 3.374420883 | 3.350612983 | 3.330102267 | 3.426377917 | 3.257990167 |
| "Dnm3"     | 2.3801782   | 2.5052655   | 2.4493608   | 2.5368073   | 2.451175    | 2.4535687   | 2.446642    | 2.529741    |
| "Dnm3oc"   | 3.17695425  | 3.32248425  | 4.4613261   | 3.42262805  | 3.5540943   | 3.2441241   | 3.2737961   | 3.36155475  |
| "Dnmbp"    | 6.5546227   | 5.606436    | 6.5059886   | 6.430584    | 6.60009     | 6.091412    | 6.1197743   | 6.836168    |
| "Dnmt1"    | 5.84102345  | 5.71418355  | 6.579288    | 6.1271985   | 6.001517    | 6.63472835  | 6.48744625  | 6.23275065  |
| "Dnmt3a"   | 5.12508908  | 4.89532314  | 6.84694988  | 6.9430775   | 5.86169246  | 5.34749394  | 6.18604184  | 6.55817822  |
| "Dnmt3b"   | 2.62086675  | 2.6760646   | 2.6338476   | 2.72080735  | 2.64679565  | 2.730661    | 2.9075653   | 2.7342265   |
| "Dnmt3l"   | 2.57794     | 2.630224    | 2.6010137   | 2.7584789   | 2.6025224   | 2.5458903   | 2.597753    | 2.6784654   |
| "Dnpep"    | 7.35303826  | 7.22987846  | 7.55840788  | 7.64462016  | 7.53370388  | 7.32975494  | 7.3596594   | 7.5421121   |
| "Dntt"     | 2.0570962   | 2.1326115   | 2.0893075   | 2.1639032   | 2.0905201   | 2.8550396   | 2.08755     | 2.1623344   |
| "Dnttip1"  | 8.61903     | 9.446433    | 8.207705    | 8.253458    | 8.79289     | 9.197992    | 8.296421    | 8.204338    |
| "Dnttip2"  | 8.06916285  | 9.237283    | 7.648618    | 7.9037805   | 8.50739665  | 9.0934745   | 7.820833    | 8.0347735   |
| "Doc2a"    | 2.546345    | 2.6702285   | 2.6235023   | 2.7375093   | 2.6225138   | 2.5767546   | 2.6113865   | 2.719748    |
| "Doc2b"    | 2.889709    | 5.09357625  | 2.02114165  | 2.4736116   | 3.14051305  | 4.29239365  | 2.1689936   | 2.185468    |
| "Doc2g"    | 2.3985975   | 2.4238029   | 2.4140494   | 2.475061    | 2.4093435   | 2.336964    | 2.4086165   | 2.4649694   |
| "Dock1"    | 5.9013596   | 4.953683    | 5.6209393   | 5.198076    | 5.492233    | 5.4084363   | 5.733535    | 5.1387153   |
| "Dock2"    | 2.3783479   | 2.412105    | 2.3933215   | 2.247947    | 2.7264395   | 4.243001    | 2.5091722   | 2.3241506   |
| "Dock5"    | 2.4619493   | 2.4611337   | 2.4624636   | 2.5269065   | 2.4604313   | 2.5625176   | 2.5579538   | 2.5022457   |
| "Dock6"    | 5.045925    | 5.0821824   | 4.9090705   | 4.97612     | 4.922203    | 5.087075    | 4.9082456   | 5.0919886   |
| "Dock7"    | 5.03208325  | 5.03837185  | 5.4230933   | 5.32340765  | 5.20046115  | 4.874107    | 5.4593308   | 5.20253585  |
| "Dock8"    | 4.588767    | 4.2337027   | 4.670334    | 3.9147055   | 4.3801494   | 5.3758345   | 4.377135    | 4.319457    |
| "Dock9"    | 7.5531965   | 8.478987533 | 7.561506667 | 8.134048333 | 8.562802233 | 8.752927    | 8.002072    | 8.273735333 |
| "Dohh"     | 5.0922695   | 5.30509045  | 5.2174862   | 5.277479    | 5.089852    | 5.0620605   | 5.0351332   | 5.09484505  |
| "Dok1"     | 3.2299488   | 3.0059097   | 3.8103564   | 3.0484254   | 3.0417163   | 3.3670282   | 2.8836906   | 3.0535035   |
| "Dok2"     | 2.3054283   | 2.3401778   | 2.4014218   | 2.3640819   | 2.353871    | 2.3283195   | 2.3375187   | 2.3654819   |
| "Dok3"     | 2.740324    | 2.786047    | 2.7388883   | 2.854624    | 2.7825277   | 3.5169861   | 2.7887635   | 2.8343835   |
| "Dolk"     | 7.444883    | 8.166315    | 8.275819    | 8.079169    | 8.203122    | 7.8194776   | 8.124904    | 8.033157    |
| "Dom3z"    | 3.7795331   | 3.506611    | 3.4591968   | 3.4711933   | 3.5401309   | 3.8434553   | 4.131921    | 3.506497    |
| "Donson"   | 2.9532478   | 3.2213142   | 3.0407925   | 3.109733    | 3.08855     | 3.0760531   | 3.0891933   | 3.1716137   |
| "Dopey2"   | 4.125782    | 3.76858     | 4.50831985  | 4.51711     | 3.9296738   | 3.88037825  | 4.3784176   | 4.7896459   |
| "Dos"      | 2.7039819   | 2.81101475  | 2.76511135  | 2.8761295   | 2.74807865  | 2.74416365  | 2.7654627   | 2.84912985  |
| "Dpagt1"   | 4.4616256   | 4.452335    | 4.6525927   | 4.504365    | 4.4676113   | 4.327916    | 4.5147386   | 4.5047245   |
| "Dpcd"     | 6.7700796   | 6.8505397   | 7.1260166   | 7.035831    | 6.824789    | 6.4591374   | 6.7479277   | 7.117092    |
| "Dpep1"    | 7.60572665  | 7.75582665  | 6.61268775  | 6.66565315  | 8.5916605   | 8.9988945   | 7.32620265  | 7.19370875  |
| "Dpep3"    | 2.728841    | 2.835676    | 2.7734609   | 2.9288447   | 2.7940593   | 2.729971    | 2.7624853   | 2.8696709   |
| "Dpf1"     | 2.74583665  | 2.85716355  | 2.7686508   | 2.8713838   | 2.7738049   | 2.7171579   | 2.76810835  | 2.8640381   |
| "Dpf2"     | 7.3021197   | 8.099292    | 7.5935326   | 7.481969    | 8.09093     | 7.8254128   | 7.0534596   | 7.3254113   |
| "Dpf3"     | 3.05346085  | 4.0370707   | 2.9121041   | 2.69733595  | 4.00925835  | 3.78585525  | 2.65904705  | 2.6646963   |
| "Dph1"     | 4.554822    | 5.355889    | 4.1899443   | 4.30542     | 4.1371613   | 5.349308    | 4.190174    | 3.300888    |
| "Dph2"     | 2.8227184   | 3.0079067   | 2.8836825   | 3.019832    | 2.8822486   | 2.8486679   | 2.8780062   | 3.0030382   |
| "Dph5"     | 4.6628195   | 5.231851    | 4.3132405   | 4.70052575  | 4.7882435   | 4.8294758   | 4.76333035  | 3.9178657   |

|              |             |             |             |             |             |             |             |             |
|--------------|-------------|-------------|-------------|-------------|-------------|-------------|-------------|-------------|
| "Dpm1"       | 6.5333155   | 8.11271915  | 7.1880625   | 7.3662175   | 7.0170238   | 7.1818213   | 6.527463    | 7.344919    |
| "Dpm2"       | 6.8022428   | 7.400435    | 6.680116    | 6.7353387   | 7.1110487   | 7.3111234   | 6.8648586   | 6.704045    |
| "Dpp3"       | 5.8133264   | 5.157864    | 5.7434835   | 5.791231    | 5.737816    | 5.6212687   | 5.890993    | 5.7912054   |
| "Dpp4"       | 4.25729875  | 3.4017525   | 4.23850865  | 3.59528325  | 4.0310777   | 3.99978805  | 3.75092085  | 3.9279999   |
| "Dpp7"       | 5.085889067 | 4.669537733 | 4.871621967 | 4.7903593   | 4.9800105   | 4.820101333 | 4.844037933 | 4.866839967 |
| "Dpp8"       | 6.534782    | 7.87165315  | 7.16826225  | 7.38576265  | 6.9946978   | 7.3132255   | 6.5873647   | 6.92210745  |
| "Dppa2"      | 2.5615857   | 2.7278395   | 2.6225977   | 2.7187967   | 2.6253638   | 2.5846019   | 2.5926173   | 2.7377717   |
| "Dppa4"      | 2.6495893   | 2.660078    | 2.6230216   | 2.710051    | 2.6318893   | 2.566214    | 2.6379397   | 2.7079332   |
| "Dppa5a"     | 2.402278    | 2.4754152   | 2.6622365   | 2.555071    | 2.5036235   | 2.418155    | 3.0124474   | 2.5228386   |
| "Dpt"        | 8.999678    | 8.7645855   | 11.337695   | 9.911525    | 11.445279   | 10.7593355  | 10.371759   | 10.218412   |
| "Dpy30"      | 8.742843    | 8.844432    | 9.846105    | 9.889301    | 8.988374    | 8.691293    | 9.821097    | 9.619838    |
| "Dpyd"       | 8.5954575   | 4.65732645  | 3.89582435  | 4.49705325  | 4.86930835  | 5.9184082   | 4.88694495  | 4.5087719   |
| "Dpys"       | 6.90161205  | 2.3978896   | 2.3495684   | 2.4273872   | 2.34415115  | 2.29927635  | 2.3213614   | 2.41878915  |
| "Dpysl3"     | 4.80432585  | 4.04766285  | 6.22760365  | 5.3889653   | 4.923088    | 4.67776685  | 5.36885765  | 5.43962565  |
| "Dpysl4"     | 2.5431583   | 2.9752204   | 2.6167839   | 2.6815615   | 2.623174    | 2.5564039   | 2.6179807   | 2.8403776   |
| "Dpysl5"     | 2.6916778   | 2.9143956   | 2.8367398   | 3.0931334   | 2.848427    | 2.7631512   | 2.836767    | 2.9584804   |
| "Dqx1"       | 2.9523394   | 2.9862638   | 2.9674275   | 3.0498781   | 2.9663608   | 3.015249    | 2.9512625   | 3.0487742   |
| "Dr1"        | 5.51499115  | 5.4754978   | 5.3775245   | 5.95035395  | 5.6619381   | 5.70717635  | 5.65161835  | 6.133206    |
| "Dram1"      | 4.7368603   | 4.729132    | 5.86423     | 3.4618714   | 7.3217416   | 7.1794524   | 6.736021    | 5.122315    |
| "Dram2"      | 9.615156    | 9.479138    | 9.663613    | 9.893713    | 9.859786    | 9.80561725  | 9.6905985   | 10.0532685  |
| "Drap1"      | 9.926018    | 10.652339   | 10.623393   | 10.541557   | 10.182028   | 10.052003   | 10.147156   | 10.317677   |
| "Drd2"       | 2.3732915   | 2.4024885   | 2.3887966   | 2.459165    | 2.3864427   | 2.3443341   | 2.388076    | 2.4551399   |
| "Drd4"       | 2.6387892   | 2.6972752   | 2.6521614   | 2.9113207   | 2.651344    | 2.624642    | 2.6376681   | 2.7071683   |
| "Drg1"       | 8.9445635   | 9.1997895   | 8.7983545   | 8.85754025  | 9.0060835   | 8.980743    | 9.1974425   | 8.842111    |
| "Drg2"       | 5.7708216   | 6.2297163   | 4.659933    | 5.299356    | 5.6369843   | 6.101391    | 5.0286527   | 4.7830815   |
| "Dsc1"       | 2.3513231   | 2.5038738   | 2.41172046  | 2.5749469   | 2.426441    | 2.3811598   | 2.406099    | 2.5576603   |
| "Dsc2"       | 4.1924795   | 2.70037985  | 2.63492775  | 2.76383745  | 2.64218905  | 2.58577585  | 2.62832285  | 2.73056765  |
| "Dsc3"       | 2.5331495   | 2.6138287   | 2.5935018   | 2.677886    | 2.5964108   | 2.5145068   | 2.5951738   | 2.6720395   |
| "Dscr3"      | 7.9065638   | 7.311164    | 8.152599    | 8.006712    | 7.745465    | 8.087746    | 8.14101     | 7.8261013   |
| "Dsg2"       | 4.7174461   | 2.82057155  | 2.903150025 | 2.95144645  | 2.817309625 | 3.6358443   | 2.825603025 | 2.9616949   |
| "Dsn1"       | 2.842354    | 3.5456362   | 2.8580363   | 2.9222467   | 3.0833647   | 2.861593    | 2.787076    | 3.0186014   |
| "Dsp"        | 5.6482994   | 2.751064667 | 6.727986567 | 2.816261433 | 2.6901492   | 2.651676067 | 2.677258433 | 2.785311333 |
| "Dst"        | 6.4109077   | 6.681441275 | 6.493511225 | 6.43099395  | 6.5110221   | 6.559915575 | 6.21926465  | 6.586838925 |
| "Dstn"       | 10.996133   | 11.110807   | 10.440781   | 9.954012    | 10.584875   | 11.20531    | 9.90859     | 9.924257    |
| "Dstyky"     | 6.5420645   | 6.6740384   | 6.62166     | 6.655678    | 6.732386    | 6.947794    | 6.778023    | 6.5878301   |
| "Dtd1"       | 7.920617    | 8.29057     | 8.503402    | 8.117546    | 7.9426045   | 8.084035    | 8.381896    | 8.102745    |
| "Dti"        | 2.339882    | 2.4429717   | 2.4069471   | 2.5128496   | 2.3894243   | 2.334311    | 2.3833976   | 2.4747314   |
| "Dtna"       | 6.251819817 | 7.229445133 | 7.299856867 | 7.5075377   | 6.533941217 | 6.757873733 | 7.437608    | 7.562558583 |
| "Dtnb"       | 3.4899209   | 3.6866424   | 3.6065545   | 3.6799538   | 3.5153153   | 3.5885866   | 3.5719984   | 3.644342    |
| "Dtnbp1"     | 8.449429    | 8.526279    | 8.212519    | 8.486805    | 8.656876    | 8.0152645   | 9.292039    | 8.555176    |
| "Dtwd1"      | 5.601072    | 5.5179324   | 6.088257    | 6.2841043   | 6.2131066   | 5.527622    | 6.1866326   | 6.34056     |
| "Dtx1"       | 2.1348326   | 1.9562144   | 1.9960186   | 1.9888299   | 1.9573648   | 2.7918706   | 1.9249254   | 2.019047    |
| "Dtx2"       | 5.18693615  | 5.5748118   | 5.2841183   | 5.1104367   | 5.32012655  | 5.65101255  | 5.40689995  | 5.26495605  |
| "Dtx3"       | 3.410853    | 3.8197422   | 3.6450632   | 4.0035524   | 3.6680012   | 3.6077359   | 3.6630661   | 3.7171056   |
| "Dtymk"      | 5.9913771   | 5.685175    | 6.609971067 | 6.575879867 | 5.837576233 | 5.9504731   | 6.872827867 | 6.644541333 |
| "Dub2a"      | 2.495893    | 2.608302    | 2.55183     | 2.6785039   | 2.55457725  | 2.5062226   | 2.54594005  | 2.64639365  |
| "Duoxa1"     | 2.1409864   | 2.1860464   | 2.8775008   | 2.240761    | 2.1527636   | 2.132311    | 2.1506271   | 2.215241    |
| "Duoxa2"     | 2.1708772   | 2.2776248   | 2.203163    | 2.2917254   | 2.4678268   | 2.1728299   | 2.2088745   | 2.2854085   |
| "Dus1"       | 8.2713165   | 8.7044115   | 8.2004762   | 8.284536    | 8.4333752   | 8.4678      | 8.1661165   | 8.2584815   |
| "Dus3"       | 6.9479046   | 7.3059487   | 7.030526    | 6.927974    | 7.1296744   | 7.033133    | 6.501704    | 6.694165    |
| "Dusp1"      | 10.369962   | 9.667905    | 10.873489   | 10.611576   | 9.746172    | 9.850398    | 10.547029   | 10.564442   |
| "Dusp10"     | 3.95648555  | 3.2359759   | 4.9537274   | 5.60962485  | 4.39362585  | 4.09547675  | 4.670352    | 5.15886425  |
| "Dusp11"     | 7.54703875  | 7.60051115  | 7.51249415  | 7.0338243   | 7.558346    | 6.1670825   | 7.70954975  | 7.31552165  |
| "Dusp12"     | 5.46864     | 5.522787    | 5.625014    | 5.5022426   | 5.478146    | 5.3870564   | 5.48776     | 5.505245    |
| "Dusp13"     | 9.246929    | 9.372089    | 8.736347    | 8.717485    | 8.298476    | 8.892965    | 9.10186     | 8.564714    |
| "Dusp14"     | 3.5008926   | 2.535781    | 4.4267387   | 5.3411407   | 3.5122008   | 2.0894637   | 4.6865425   | 4.0662603   |
| "Dusp16"     | 8.962802    | 8.404124    | 8.519694    | 8.439013    | 8.116938    | 8.152571    | 8.254979    | 8.315768    |
| "Dusp18"     | 8.032213    | 6.763734    | 5.9855742   | 7.1686373   | 7.88142     | 6.969838    | 6.950441    | 7.4985886   |
| "Dusp19"     | 6.74953985  | 5.944714    | 7.06510665  | 7.42188435  | 6.6659743   | 5.9341425   | 7.62025335  | 7.1237115   |
| "Dusp2"      | 1.8955228   | 1.9095113   | 1.904396    | 1.9179541   | 1.8976873   | 2.6932945   | 2.8501954   | 1.9367537   |
| "Dusp22"     | 7.998995    | 7.3481536   | 8.097457    | 8.435173    | 7.8429136   | 7.2590404   | 8.521357    | 8.250611    |
| "Dusp26"     | 9.143494    | 9.9012375   | 8.8049965   | 8.579183    | 9.934309    | 9.164509    | 9.1659155   | 8.6375065   |
| "Dusp3"      | 7.7792009   | 7.25761215  | 7.98712965  | 7.9777915   | 7.1028503   | 6.9491615   | 7.95393575  | 7.68876935  |
| "Dusp6"      | 8.233532    | 6.567575    | 7.9984627   | 8.53452     | 7.6136184   | 8.125781    | 8.154677    | 8.541241    |
| "Dusp7"      | 4.951659267 | 5.157588333 | 5.149924067 | 5.1444323   | 5.713839333 | 4.836244    | 5.225936067 | 5.500385367 |
| "Dusp8"      | 5.3446426   | 4.988733    | 5.371522    | 5.2272043   | 4.6687202   | 4.6453485   | 4.868069    | 4.9245954   |
| "Dusp9"      | 2.512243367 | 2.622293233 | 2.562612267 | 2.690240167 | 2.5725505   | 2.521731133 | 2.5641472   | 2.660271533 |
| "Dut"        | 5.6101766   | 5.907849    | 7.1100674   | 7.2209597   | 5.820865    | 6.112086    | 6.252049    | 7.1344995   |
| "Dvl1"       | 10.309497   | 10.719592   | 10.93671    | 11.0138485  | 10.6492855  | 10.293815   | 10.9789325  | 10.8621375  |
| "Dvl2"       | 2.60363765  | 2.8775524   | 2.71367365  | 2.79714695  | 2.7253461   | 2.73879565  | 2.71540485  | 2.795143    |
| "DXBay18"    | 2.6476488   | 2.7690337   | 2.7933862   | 2.853075    | 2.7312474   | 2.661354    | 2.732278    | 2.8187988   |
| "DXErtd11e"  | 2.7546487   | 2.9290469   | 2.9270325   | 2.864964    | 2.7944252   | 2.6508632   | 2.7572176   | 2.8472817   |
| "DXErtd223e" | 2.99527525  | 3.2902527   | 3.03323075  | 3.09485085  | 2.9527862   | 3.14542745  | 3.09722515  | 3.10521805  |
| "DXErtd242e" | 2.6158772   | 2.749341    | 2.7093854   | 2.8141224   | 2.7088242   | 2.6300793   | 2.706203    | 2.7933867   |
| "Dym"        | 8.798047    | 9.406232    | 8.8491825   | 9.212634    | 8.818843    | 8.58586035  | 9.321359    | 9.065373    |
| "Dync1h1"    | 9.204716    | 9.195354    | 9.093216    | 9.007056    | 9.228666    | 9.787212    | 9.209206    | 9.071798    |
| "Dync1i1"    | 2.6577048   | 2.7650251   | 2.6191946   | 2.8842158   | 2.6953382   | 2.626451    | 2.689874    | 2.803924    |
| "Dync1i2"    | 9.248497    | 9.54669     | 9.44253     | 9.36977     | 9.414551    | 9.526484    | 9.317578    | 9.548343    |
| "Dync1li1"   | 8.69608     | 8.556003    | 8.099253    | 8.391556    | 8.107145    | 8.12469     | 8.233968    | 8.097096    |
| "Dync1l1"    | 9.854533    | 8.362743667 | 10.69310767 | 10.14457    | 9.635735667 | 9.580406    | 11.610316   | 10.23069833 |
| "Dync1l2"    | 9.3510165   | 8.7584327   | 9.86737675  | 10.1371205  | 9.10289075  | 8.7070435   | 10.249724   | 9.81781925  |

|                 |             |             |             |             |             |             |             |             |
|-----------------|-------------|-------------|-------------|-------------|-------------|-------------|-------------|-------------|
| "Dylnrb1"       | 10.695866   | 10.51254    | 10.948712   | 11.031785   | 10.841448   | 10.3793955  | 11.029994   | 10.741711   |
| "Dyln1a"        | 11.0831605  | 11.209538   | 11.3851195  | 11.40572    | 11.21064025 | 11.12497    | 11.541603   | 11.1672485  |
| "Dyln1f"        | 4.60176445  | 5.2949478   | 5.23224075  | 5.297987    | 4.73926315  | 4.896322    | 5.2817453   | 5.43657305  |
| "Dyln13"        | 9.174238567 | 8.978439667 | 9.771507333 | 9.770399333 | 9.3438871   | 8.791812333 | 9.631068833 | 9.606957667 |
| "Dyrk1a"        | 6.965163333 | 7.339195733 | 5.933847467 | 6.640066667 | 6.8532466   | 6.9679952   | 6.358142333 | 6.579020367 |
| "Dyrk1b"        | 2.9885614   | 3.3318686   | 3.126953    | 3.162141    | 3.3880796   | 2.9882367   | 3.1076927   | 3.1550982   |
| "Dyrk3"         | 2.414381    | 2.467233    | 2.4261565   | 2.516311    | 2.4201422   | 2.4046197   | 2.4227166   | 2.5132422   |
| "Dysf"          | 6.54726     | 6.9386406   | 6.488674    | 6.9565377   | 6.396042    | 6.3893604   | 6.907082    | 6.3120737   |
| "Dyx1c1"        | 2.8751419   | 2.9598572   | 2.8277812   | 2.9896739   | 2.9223347   | 2.9077346   | 2.9099116   | 2.9911985   |
| "Dzip1"         | 2.5389825   | 2.708081067 | 2.714802367 | 2.7350731   | 2.629996233 | 2.586405833 | 2.614105767 | 2.705667167 |
| "E130012A19Rik" | 2.6058278   | 2.6795855   | 2.6253924   | 2.7658117   | 2.6275315   | 2.584852    | 2.6202352   | 2.7404323   |
| "E130303B06Rik" | 2.4122407   | 2.4529781   | 2.4409347   | 2.5320737   | 2.439876    | 2.420814    | 2.4394004   | 2.525698    |
| "E130018D02Rik" | 6.37955235  | 6.50612115  | 6.44910325  | 6.52096065  | 6.102082    | 6.52449845  | 6.48389535  | 6.3868192   |
| "E230006M18Rik" | 2.5209084   | 2.6001687   | 2.566887    | 2.6949656   | 2.5700016   | 2.5139937   | 2.5605745   | 2.650454    |
| "E2f1"          | 2.5880746   | 2.68383345  | 2.81504355  | 2.7913106   | 2.64910615  | 2.6195995   | 2.61652455  | 2.73621895  |
| "E2f3"          | 2.3196445   | 2.350202    | 2.345666    | 2.509068    | 2.3473363   | 2.1872706   | 2.3558822   | 2.4133363   |
| "E2f5"          | 4.354884    | 4.1142313   | 4.4119885   | 4.47547745  | 4.5013407   | 4.1575912   | 4.54313725  | 4.717744    |
| "E2f6"          | 9.116068    | 9.142959    | 9.956653    | 10.360284   | 9.13989     | 9.324425    | 9.812225    | 10.3157215  |
| "E2f8"          | 2.417101    | 2.442878    | 2.4333808   | 2.4871435   | 2.4459713   | 2.4073348   | 2.4313114   | 2.5139182   |
| "E330009J07Rik" | 3.6693482   | 4.331397    | 4.895796    | 4.8179517   | 5.232865    | 5.426027    | 4.893041    | 5.2424893   |
| "E330034G19Rik" | 2.4912353   | 2.6133676   | 2.5709665   | 2.6733227   | 2.57364     | 2.5377803   | 2.56849     | 2.6604133   |
| "E430018J23Rik" | 3.3116896   | 3.4447238   | 3.2686994   | 3.4281163   | 3.2644196   | 3.2133446   | 3.1249537   | 3.3517365   |
| "E4f1"          | 6.3532434   | 7.567031    | 6.2797933   | 6.3006496   | 7.1118484   | 6.986752    | 5.951199    | 5.9920006   |
| "Eapp"          | 8.985491    | 9.469157    | 8.708038    | 8.654601    | 8.83152     | 9.303047    | 9.1933775   | 8.693964    |
| "Ear1"          | 5.2232068   | 4.12898695  | 5.15733     | 4.1735536   | 5.3892609   | 4.77934445  | 4.7409579   | 4.502013    |
| "Ear11"         | 2.6705303   | 2.8302283   | 2.7723317   | 2.9019146   | 2.7744708   | 2.722436    | 2.7619455   | 2.8437257   |
| "Ear12"         | 6.159994    | 2.9221225   | 6.0499287   | 2.8519034   | 6.014718    | 5.552455    | 4.6626368   | 3.3315501   |
| "Ear3"          | 3.4419053   | 3.468217    | 3.4474287   | 3.5388744   | 3.4600415   | 3.445013    | 3.4557953   | 3.5349674   |
| "Ear4"          | 2.329317    | 2.5273564   | 2.3646824   | 2.4891431   | 2.3818772   | 2.3226137   | 2.3760083   | 2.4787612   |
| "Ear5"          | 2.4328446   | 2.4854555   | 2.4541557   | 2.509452    | 2.4475071   | 2.4107687   | 2.4420762   | 2.5347145   |
| "Ears2"         | 3.69628825  | 3.9204429   | 3.7129163   | 3.8045082   | 3.73445725  | 3.4848838   | 3.694874    | 3.64580125  |
| "Ebag9"         | 8.298384    | 8.661038    | 8.862299    | 9.408533    | 8.510115    | 8.347       | 8.798211    | 8.95993     |
| "Ebf1"          | 6.3487271   | 6.4159834   | 7.234789867 | 7.047199433 | 7.513283    | 7.498749933 | 7.3132029   | 7.5351211   |
| "Ebf2"          | 3.596627933 | 3.593698433 | 3.805183967 | 3.9532429   | 4.095337733 | 4.0104228   | 3.895856433 | 3.996472433 |
| "Ebf3"          | 4.6870866   | 5.339327267 | 4.902282467 | 5.0962603   | 5.3024175   | 4.980644233 | 5.055264933 | 4.739384967 |
| "Ebi3"          | 2.3191779   | 2.3397942   | 2.3371372   | 2.4137692   | 2.3313127   | 2.754866    | 2.3429317   | 2.3953946   |
| "Ebna1bp2"      | 5.7840701   | 6.2328947   | 5.71992165  | 5.91300215  | 5.9070467   | 5.9232455   | 5.93609815  | 5.89082435  |
| "Ebp"           | 9.80694     | 6.5656924   | 5.761726    | 6.8140225   | 7.493087    | 7.438149    | 7.6130733   | 6.928289    |
| "Ebpl"          | 6.831969    | 5.6145954   | 7.0957737   | 6.4736934   | 5.84982     | 5.5172443   | 6.9354053   | 6.357854    |
| "Ecd"           | 6.1464115   | 6.37383465  | 6.4205727   | 6.44950015  | 6.2417523   | 5.79323115  | 6.555875    | 6.422139    |
| "Ece1"          | 6.52506055  | 6.7829363   | 5.796032    | 5.938674    | 6.51984185  | 6.34206435  | 5.7139428   | 6.11350195  |
| "Ece2"          | 6.2673516   | 5.789665    | 5.847934    | 5.4714556   | 5.4841075   | 5.8175693   | 6.20204     | 5.5086675   |
| "Ech1"          | 11.430091   | 11.269606   | 11.399647   | 11.436722   | 11.939134   | 11.56592    | 11.623182   | 11.848945   |
| "Echdc1"        | 6.3883505   | 5.3411775   | 6.2284713   | 6.4553576   | 6.4108005   | 6.4593925   | 7.276454    | 6.529257    |
| "Echdc2"        | 6.7240767   | 4.758567    | 5.2902117   | 5.17191     | 5.7963524   | 5.264575    | 5.6751003   | 5.209179    |
| "Echdc3"        | 6.580825    | 4.9141827   | 6.419151    | 6.059722    | 6.0776844   | 5.0909348   | 6.623704    | 5.5412874   |
| "Echs1"         | 10.658872   | 10.232879   | 10.132093   | 10.052146   | 10.923151   | 10.374207   | 10.731093   | 10.416637   |
| "Eci1"          | 10.812484   | 10.662958   | 10.808137   | 10.914668   | 11.27438    | 10.737505   | 10.994703   | 11.146586   |
| "Eci2"          | 9.8314705   | 10.213975   | 9.647854    | 9.541306    | 10.47505    | 10.559593   | 9.710195    | 9.92424     |
| "Eci3"          | 2.5332246   | 2.5660686   | 2.5615635   | 2.6141777   | 3.021046    | 2.5231519   | 2.9829187   | 2.6133466   |
| "Ecm1"          | 7.073449    | 4.9488306   | 6.638734    | 5.6057205   | 6.825467    | 7.1410346   | 6.311426    | 5.2833967   |
| "Ecsit"         | 8.116488    | 8.427141    | 8.564013    | 8.992007    | 8.281042    | 7.9375415   | 8.375601    | 8.593639    |
| "Ect2"          | 2.368197    | 2.4926376   | 2.3948789   | 2.4808977   | 2.3737972   | 2.3448334   | 2.3866801   | 2.4632087   |
| "Eda"           | 2.38627875  | 2.46366105  | 2.423947    | 2.5239533   | 2.42807835  | 2.3822609   | 2.42182875  | 2.5076475   |
| "Edc4"          | 6.684192    | 7.463863    | 6.781213    | 6.702719    | 7.122603    | 7.2658606   | 6.7626514   | 6.732247    |
| "Edem1"         | 7.9891015   | 6.80543335  | 5.9063013   | 5.177148    | 7.10327385  | 7.91931765  | 6.4316833   | 5.432694    |
| "Edem2"         | 4.1869087   | 3.7725155   | 3.80767     | 3.5770075   | 4.310186    | 4.4996114   | 3.607768    | 3.601581    |
| "Edem3"         | 8.397594    | 8.479841    | 8.402716    | 8.2338295   | 8.432337    | 8.93428     | 8.346144    | 8.210827    |
| "Edf1"          | 10.237403   | 9.965786    | 10.162163   | 10.188036   | 9.859451    | 9.5343625   | 10.644712   | 10.05203275 |
| "Edil3"         | 2.750771    | 2.9413425   | 2.83353925  | 3.0017284   | 2.8683708   | 2.74961375  | 2.82156145  | 2.95207165  |
| "Edn1"          | 5.9248896   | 4.930834    | 3.8706431   | 3.8470294   | 4.6541114   | 5.7791343   | 3.6588948   | 4.234998    |
| "Ednra"         | 2.479914    | 2.5654936   | 2.5260503   | 2.6437352   | 2.535211    | 2.493901    | 2.643658    | 2.6878717   |
| "Ednrb"         | 3.76820275  | 3.3904075   | 3.5960321   | 3.3428615   | 3.52334     | 3.4054446   | 3.6651578   | 3.6239445   |
| "Eea1"          | 6.972412    | 7.3336606   | 7.4502907   | 7.650802    | 7.3762064   | 7.526075    | 7.336731    | 7.838645    |
| "Eed"           | 5.769049    | 6.3170397   | 5.655439    | 5.77027025  | 5.99832925  | 6.29215965  | 5.8463496   | 5.7573715   |
| "Eef1a1"        | 13.846873   | 12.887176   | 13.216612   | 12.519757   | 13.514213   | 13.833857   | 13.461507   | 12.706555   |
| "Eef1a2"        | 11.309783   | 11.319041   | 11.623671   | 11.492367   | 11.544806   | 11.149906   | 11.601048   | 11.434603   |
| "Eef1b2"        | 13.019184   | 12.903576   | 12.980893   | 12.871973   | 12.967369   | 12.893322   | 13.259806   | 13.161353   |
| "Eef1d"         | 11.2444275  | 11.28809425 | 11.4015955  | 11.5256605  | 11.296054   | 11.05664    | 11.500409   | 11.5172705  |
| "Eef1e1"        | 8.467748    | 8.271582    | 8.794672    | 8.963421    | 8.149352    | 7.606974    | 9.056583    | 8.711385    |
| "Eef1g"         | 12.327852   | 12.358969   | 12.985359   | 12.82442    | 12.372594   | 12.50023    | 12.845146   | 12.663665   |
| "Eef2"          | 11.972334   | 11.968737   | 11.848808   | 11.917848   | 11.767213   | 11.963251   | 12.109066   | 11.873446   |
| "Eef2k"         | 6.868037    | 7.5323887   | 7.2043004   | 7.302468    | 6.898898    | 6.241516    | 7.869882    | 7.206851    |
| "Eefsec"        | 3.3049688   | 3.032579    | 3.0654643   | 3.2909315   | 3.4629273   | 3.1892252   | 3.1242719   | 3.423195    |
| "Eepd1"         | 8.303271    | 9.781905    | 9.364176    | 9.520245    | 9.960272    | 8.503289    | 8.963932    | 9.667987    |
| "Efcab2"        | 5.0476085   | 5.6593604   | 5.0808107   | 5.7199316   | 4.91657075  | 4.9784364   | 5.0161821   | 5.4564228   |
| "Efcab4a"       | 3.3048122   | 4.218583    | 4.02777     | 4.1586275   | 4.71053     | 5.3272996   | 4.1550693   | 4.501505    |
| "Efcab7"        | 2.6299562   | 2.9562895   | 2.9374914   | 2.9987538   | 2.7258992   | 2.90365     | 3.1580799   | 3.2826858   |
| "Efemp1"        | 7.344254    | 6.329986    | 8.279636    | 8.164777    | 8.542155    | 8.147956    | 7.650833    | 8.497654    |
| "Efemp2"        | 3.2746043   | 2.8527985   | 5.5693445   | 4.460355    | 4.4011135   | 4.3967333   | 4.526005    | 4.562102    |
| "Efhd1"         | 4.7381926   | 4.2418346   | 6.758111    | 5.5525136   | 5.4970255   | 4.9346848   | 4.745583    | 5.1825857   |

|             |             |             |             |             |             |             |             |             |
|-------------|-------------|-------------|-------------|-------------|-------------|-------------|-------------|-------------|
| "Efh2"      | 6.5849485   | 5.0967937   | 5.254465    | 4.838536    | 5.286009    | 5.837569    | 5.5665445   | 4.741681    |
| "Efn1"      | 7.3252675   | 4.6478795   | 5.0663475   | 5.29397     | 4.814446    | 4.65000775  | 4.96720735  | 5.336815    |
| "Efn3"      | 3.030927    | 3.0795913   | 3.0486646   | 3.1296828   | 3.0492473   | 2.9813845   | 3.036127    | 3.118135    |
| "Efnb1"     | 4.9898569   | 4.8536657   | 4.8459545   | 4.8844846   | 5.1504815   | 5.5668692   | 4.97408795  | 5.2464841   |
| "Efnb2"     | 5.0280785   | 5.1902393   | 5.16465305  | 5.41905785  | 4.9774067   | 5.043318    | 5.1933905   | 5.38703975  |
| "Efnb3"     | 2.1656237   | 2.350423    | 2.2381184   | 2.3083043   | 2.588471    | 2.1702125   | 2.266029    | 2.3206112   |
| "Efr3a"     | 6.882887    | 7.061588    | 7.4768954   | 7.572343667 | 7.426266233 | 7.155990333 | 7.319431333 | 7.736201333 |
| "Efs"       | 2.3089345   | 2.5971498   | 3.5730095   | 2.6476106   | 2.5747136   | 2.56888815  | 2.5740694   | 2.6739607   |
| "Eftud1"    | 5.717408    | 6.570919    | 5.564996    | 5.951566    | 5.8858294   | 5.86082     | 5.884096    | 6.297301    |
| "Eftud2"    | 7.986520433 | 8.4581065   | 7.9252884   | 7.696649333 | 7.9425798   | 8.0860721   | 8.007726867 | 7.8710788   |
| "Egf"       | 7.731724    | 8.237393    | 8.761965    | 8.44227     | 8.747673    | 7.672201    | 8.627525    | 8.415079    |
| "Egfbp2"    | 2.64502845  | 3.0071984   | 2.6902865   | 2.83863425  | 2.7132877   | 2.6391894   | 2.6803577   | 2.7837168   |
| "Egfl6"     | 2.6552296   | 2.833095    | 3.6649566   | 2.888989    | 2.8102732   | 2.6820493   | 2.7274597   | 2.938297    |
| "Egfl7"     | 6.743133275 | 7.41229225  | 7.5174263   | 7.856233375 | 7.2757113   | 7.979535525 | 7.6743735   | 7.86074275  |
| "Egfl8"     | 3.3741753   | 3.4242601   | 3.8210251   | 3.3013532   | 3.7238364   | 3.1397057   | 3.3954945   | 3.4912715   |
| "Egfr"      | 5.5146786   | 4.73654565  | 4.505820325 | 4.2293403   | 4.693419025 | 4.804167925 | 4.221505225 | 4.307381325 |
| "Egln1"     | 9.1462577   | 9.5836495   | 9.7582845   | 10.2266875  | 9.5324885   | 9.3201615   | 9.637247    | 10.192147   |
| "Egln2"     | 9.403832    | 9.814472    | 9.3325      | 9.235353    | 9.121662    | 9.343115    | 9.2960415   | 9.140212    |
| "Egln3"     | 9.912348    | 9.1160235   | 5.5545771   | 5.5769156   | 7.728571    | 8.864871    | 6.849968    | 6.309372    |
| "Egr1"      | 8.97092     | 7.0755796   | 8.220668    | 9.005161    | 7.3068757   | 7.209179    | 9.291       | 8.069792    |
| "Egr2"      | 4.85609515  | 4.6068184   | 4.8971198   | 4.6676819   | 4.47455685  | 4.1581365   | 5.2574582   | 4.7153348   |
| "Ehbp1"     | 6.2001185   | 6.635517    | 6.819063    | 6.601193    | 6.6769023   | 6.269443    | 6.9088545   | 7.203218    |
| "Ehbp11"    | 8.401515    | 8.494429    | 9.29829     | 9.31296     | 8.45610375  | 8.061698    | 8.9039005   | 9.233024    |
| "Ehd1"      | 6.32799735  | 5.723695175 | 5.892584375 | 5.721877325 | 5.98349385  | 6.4428438   | 6.456401425 | 5.871950175 |
| "Ehd2"      | 4.1370977   | 4.64117125  | 4.9288087   | 4.8273094   | 4.9925655   | 4.69729415  | 5.18027305  | 5.0104195   |
| "Ehd3"      | 5.9896673   | 4.21167745  | 3.378154    | 3.3277404   | 4.43608215  | 4.4414515   | 4.0452037   | 3.65315865  |
| "Ehd4"      | 8.395681    | 8.748286    | 8.047254    | 7.847381    | 8.608699    | 8.747022    | 8.259188    | 7.9580674   |
| "Eh"        | 2.868159667 | 3.0555651   | 2.9642108   | 3.097296607 | 2.956916267 | 2.8794188   | 2.9302646   | 3.043808733 |
| "Ehhadh"    | 9.094774    | 5.616953    | 5.6900616   | 4.842058    | 6.4732475   | 8.657623    | 6.127118    | 5.3027997   |
| "Ehmt2"     | 7.5475974   | 7.0978556   | 7.1503363   | 7.2928543   | 7.1714573   | 7.3255987   | 7.7156024   | 7.202469    |
| "Ei24"      | 9.808908    | 9.354965    | 10.001989   | 10.174782   | 9.281101    | 9.222944    | 9.912445    | 9.961042    |
| "Eid1"      | 8.4196776   | 8.193035833 | 9.053774    | 8.754350667 | 8.802136833 | 8.165051533 | 9.080636667 | 8.875739333 |
| "Eif1"      | 13.779002   | 13.9681035  | 13.5461285  | 13.617232   | 13.7322815  | 13.7822785  | 13.8457865  | 13.6670495  |
| "Eif1a"     | 7.69703385  | 6.7962589   | 6.7989498   | 6.3859675   | 6.98582435  | 6.8942642   | 6.8510821   | 6.73254775  |
| "Eif1ax"    | 9.258551    | 9.688299    | 9.956091    | 10.0231005  | 9.621746    | 9.489783    | 9.8040045   | 10.0475435  |
| "Eif1b"     | 9.817825    | 10.435064   | 9.779345    | 9.84313     | 10.011559   | 10.012394   | 9.981237    | 9.728727    |
| "Eif2ak1"   | 3.825936667 | 3.903087533 | 3.858752167 | 4.0359804   | 3.7749878   | 3.832879733 | 3.776559267 | 3.921637267 |
| "Eif2ak2"   | 2.9803421   | 3.33774865  | 3.1179095   | 3.23072145  | 3.0656411   | 3.1524564   | 3.13780725  | 3.2329359   |
| "Eif2ak3"   | 4.4167885   | 4.0575755   | 4.4108255   | 4.41633975  | 4.37179945  | 4.43546765  | 4.4942614   | 4.48311005  |
| "Eif2ak4"   | 6.047769    | 8.401313    | 4.979372    | 5.3882327   | 6.596833    | 8.566059    | 5.331826    | 5.7503343   |
| "Eif2b1"    | 8.604735    | 9.043681    | 8.423319    | 8.376406    | 8.675288    | 8.510369    | 8.589343    | 8.441088    |
| "Eif2b2"    | 8.033248067 | 8.525427333 | 8.256407667 | 8.2560786   | 8.088731767 | 8.141220167 | 8.129426667 | 8.106012    |
| "Eif2b4"    | 9.267219    | 9.486619    | 8.8570385   | 9.156073    | 9.320174    | 9.903996    | 9.218717    | 9.114013    |
| "Eif2b5"    | 8.572625    | 8.992133    | 8.710624    | 8.673976    | 8.617805    | 8.735379    | 8.617875    | 8.783324    |
| "Eif2c2"    | 8.20476     | 8.167418    | 8.661547    | 8.855337    | 8.026944    | 8.175293    | 9.016756    | 8.883944    |
| "Eif2d"     | 7.692399667 | 7.897708667 | 7.6974999   | 7.919100167 | 7.548943667 | 7.430792133 | 7.884480333 | 7.7226378   |
| "Eif2s1"    | 6.4605236   | 6.5886315   | 6.38415765  | 6.4831581   | 6.4653831   | 6.4966415   | 6.5466066   | 6.5107078   |
| "Eif2s2"    | 9.522558167 | 10.37524745 | 10.00984805 | 10.13035037 | 9.783475833 | 10.10762448 | 9.7457275   | 10.12386845 |
| "Eif2s3x"   | 8.754242333 | 8.308680833 | 8.90127     | 8.077519333 | 8.774597667 | 8.399589333 | 8.766636467 | 8.255612167 |
| "Eif2s3y"   | 2.5277364   | 10.23325    | 2.6321225   | 10.162828   | 2.6449037   | 9.834908    | 2.62578     | 10.0890465  |
| "Eif3a"     | 9.733211175 | 10.362478   | 9.062637575 | 9.281836    | 9.662224125 | 10.322757   | 9.1012665   | 9.27146775  |
| "Eif3b"     | 8.471794    | 8.589995    | 7.8744383   | 7.8740687   | 8.231066    | 8.467226    | 8.494128    | 7.947507    |
| "Eif3c"     | 10.817146   | 11.189625   | 10.79837375 | 10.68975775 | 10.87845538 | 10.944087   | 10.924014   | 10.80468075 |
| "Eif3d"     | 9.658491    | 9.9328165   | 9.2930565   | 9.0812645   | 9.599855    | 10.013278   | 9.348761    | 9.163786    |
| "Eif3e"     | 9.932388    | 10.28054605 | 10.1827477  | 10.17128    | 10.05341175 | 10.12479513 | 10.32697905 | 10.2024938  |
| "Eif3f"     | 11.7520895  | 12.194956   | 12.086104   | 12.105976   | 11.90445    | 11.938391   | 12.278539   | 12.09936    |
| "Eif3g"     | 10.399465   | 10.773823   | 10.292051   | 10.227417   | 10.373919   | 10.471552   | 10.398376   | 10.254878   |
| "Eif3h"     | 7.063928    | 7.35665835  | 7.1356245   | 7.1912322   | 7.05002615  | 7.04367135  | 7.1928537   | 7.16893675  |
| "Eif3i"     | 11.6209175  | 11.7743095  | 11.8319565  | 11.7004555  | 11.621823   | 11.520641   | 11.93867825 | 11.627963   |
| "Eif3j"     | 10.05499867 | 10.43241667 | 10.018218   | 10.34727367 | 10.34203733 | 10.44668    | 10.18924183 | 10.49499933 |
| "Eif3k"     | 10.482423   | 10.608923   | 10.64036    | 10.5082245  | 10.580266   | 10.490708   | 11.001988   | 10.575244   |
| "Eif3l"     | 5.5923171   | 5.7764024   | 5.631222533 | 5.643385133 | 5.836067533 | 5.696145133 | 5.6946136   | 5.580607767 |
| "Eif3m"     | 6.8831201   | 7.05757065  | 7.00543335  | 7.2398566   | 7.0632955   | 6.946302    | 7.0395871   | 7.15703125  |
| "Eif4a1"    | 10.53417933 | 10.767773   | 9.7051655   | 9.81595     | 10.41119267 | 10.72723767 | 10.148773   | 9.651042667 |
| "Eif4a2"    | 12.797401   | 13.355175   | 12.777186   | 12.750461   | 13.021233   | 13.283357   | 12.474046   | 12.888062   |
| "Eif4a3"    | 9.278884    | 9.752914    | 8.8633      | 8.698804    | 9.190231    | 9.58797     | 8.955526    | 8.592537    |
| "Eif4b"     | 8.908955767 | 9.085448667 | 8.925946167 | 8.759420867 | 8.884076333 | 9.141308767 | 9.212945    | 8.9351567   |
| "Eif4e"     | 6.775093667 | 7.18958133  | 8.602675133 | 8.9129975   | 7.712194667 | 7.285799267 | 8.045457333 | 8.5742599   |
| "Eif4e2"    | 5.1312182   | 5.443191875 | 4.95516415  | 5.09297635  | 5.084753825 | 5.1990448   | 5.140051125 | 5.096232475 |
| "Eif4e3"    | 8.0205705   | 9.6221525   | 9.1150365   | 9.076567    | 8.84371675  | 9.1463805   | 8.8150185   | 8.880329    |
| "Eif4ebp1"  | 10.60851357 | 11.47544167 | 8.386679667 | 8.279499667 | 10.547107   | 11.20218967 | 9.409249767 | 8.6921585   |
| "Eif4ebp2"  | 5.0710946   | 5.691654867 | 4.976301533 | 5.2310737   | 5.092188267 | 5.475451433 | 5.063286533 | 5.198900267 |
| "Eif4enif1" | 8.076929    | 8.55795     | 8.137953    | 8.13335     | 8.161565    | 8.457504    | 8.05555     | 7.99548     |
| "Eif4g1"    | 6.830740433 | 7.313636333 | 7.214177467 | 7.307566733 | 7.006805767 | 6.993415667 | 6.7261099   | 7.082163167 |
| "Eif4g2"    | 9.2245917   | 9.4295198   | 9.654105775 | 9.6888075   | 9.29964345  | 9.23886415  | 9.542066    | 9.71831025  |
| "Eif4g3"    | 10.53004    | 11.4637575  | 10.612309   | 10.553004   | 11.02225    | 11.01384    | 10.328563   | 10.462209   |
| "Eif4h"     | 10.43114933 | 10.868447   | 10.47608733 | 10.525325   | 10.54825767 | 10.82035667 | 10.595921   | 10.4206267  |
| "Eif5"      | 10.482506   | 10.49101175 | 10.08855963 | 10.059223   | 10.10694425 | 10.3951965  | 10.353682   | 10.148237   |
| "Eif5a"     | 11.4732245  | 11.4237     | 11.598887   | 11.595418   | 11.332164   | 11.1909185  | 11.602339   | 11.428698   |
| "Eif5b"     | 7.265697167 | 7.93294     | 7.247031667 | 7.6632699   | 7.2828229   | 7.376569    | 7.378864433 | 7.583768767 |
| "Eif6"      | 9.248521    | 8.833366    | 8.238533    | 8.22031     | 8.295977    | 8.480236    | 8.934702    | 8.028297    |

|             |             |             |             |             |             |             |             |             |
|-------------|-------------|-------------|-------------|-------------|-------------|-------------|-------------|-------------|
| "Elac1"     | 3.723247    | 3.96691875  | 3.93681465  | 3.9585802   | 4.10010145  | 4.17087025  | 4.0043045   | 4.12314115  |
| "Elac2"     | 5.9734442   | 6.272107767 | 5.2631017   | 5.581342533 | 5.6665754   | 6.2195119   | 5.573862533 | 5.2972819   |
| "Elavl1"    | 8.186235    | 8.204292    | 8.379667    | 8.3437318   | 8.2324647   | 8.694367    | 8.39738635  | 8.4510895   |
| "Elavl2"    | 2.444485833 | 2.630577167 | 2.5860245   | 2.588964533 | 2.480356067 | 2.4314958   | 2.475697433 | 2.5797068   |
| "Elavl3"    | 2.304232    | 2.3994439   | 2.3384454   | 2.4514232   | 2.3439014   | 2.3084493   | 2.3374097   | 2.4362068   |
| "Elavl4"    | 2.484497167 | 2.594841067 | 2.5291186   | 2.6644093   | 2.535718667 | 2.492143    | 2.527476967 | 2.6414875   |
| "Elf1"      | 5.6576705   | 5.70713     | 5.609388    | 5.5518484   | 5.9178796   | 6.555347    | 5.418158    | 5.794173    |
| "Elf2"      | 7.48443985  | 7.48656725  | 7.5411024   | 7.49909475  | 7.1917723   | 7.31361625  | 7.0603294   | 7.47808175  |
| "Elk1"      | 2.8858105   | 3.38449965  | 2.8810321   | 2.9954891   | 3.03581355  | 2.94329425  | 2.904438    | 2.97286785  |
| "Elk3"      | 4.611865333 | 4.060610067 | 4.9676634   | 5.0253731   | 4.7314045   | 5.138659    | 4.9636715   | 5.259190433 |
| "Elk4"      | 6.5923615   | 7.16846985  | 6.1274102   | 6.2314915   | 6.57458315  | 6.93856625  | 6.0653519   | 6.24202385  |
| "Eli"       | 7.3802977   | 8.126704    | 5.7034426   | 5.4022756   | 6.75333     | 7.793158    | 5.2698245   | 5.5984654   |
| "Eli2"      | 10.311456   | 8.923687    | 8.741812    | 8.904997    | 9.190752    | 8.848156    | 9.055461    | 8.961718    |
| "Elmo1"     | 2.2226685   | 2.2719846   | 2.39495515  | 2.3493047   | 2.31010985  | 2.61899375  | 2.30373015  | 2.4601331   |
| "Elmo2"     | 3.0706367   | 3.5564585   | 3.3035917   | 3.002906    | 3.3176842   | 3.292003    | 3.2996519   | 3.3034413   |
| "Elmo3"     | 2.8712084   | 2.8886375   | 2.8622813   | 2.9618564   | 2.863146    | 2.7176576   | 2.865011    | 2.9286244   |
| "Elmod3"    | 2.5771418   | 2.5849485   | 2.5168183   | 2.6452608   | 2.5559793   | 2.4667506   | 2.5163164   | 2.5486484   |
| "Eln"       | 4.950326    | 4.421122    | 6.228966    | 4.5105143   | 5.8328867   | 5.787302    | 4.428433    | 4.120306    |
| "Elof1"     | 7.968152    | 8.052517    | 8.070452    | 8.083599    | 7.8436594   | 7.806737    | 8.154549    | 7.9501195   |
| "Elov1"     | 5.879722067 | 4.594536    | 6.024313    | 5.021386133 | 5.726915333 | 6.027868667 | 6.224449933 | 5.248797367 |
| "Elov2"     | 7.4215117   | 2.9069986   | 2.806378    | 2.9752607   | 2.8161554   | 2.740253    | 2.8016315   | 2.931653    |
| "Elov3"     | 2.5452795   | 2.5582082   | 2.5527005   | 2.6026323   | 2.549231    | 2.496455    | 2.548434    | 2.5859008   |
| "Elov4"     | 2.33454885  | 2.4463631   | 4.9265597   | 2.46004965  | 2.35454775  | 2.3058575   | 2.34594085  | 2.4484022   |
| "Elov5"     | 10.149911   | 8.0322575   | 8.512528    | 7.77444635  | 8.8360285   | 9.167941    | 8.52037     | 7.9407185   |
| "Elov6"     | 2.47389235  | 2.19429465  | 5.1947655   | 2.2314745   | 2.300318    | 2.160642    | 6.2873335   | 2.23779995  |
| "Elov7"     | 2.483233    | 2.591556    | 2.54763805  | 2.62316655  | 2.5455078   | 2.49004755  | 2.53639405  | 2.63714005  |
| "Elp2"      | 6.5738118   | 6.8282232   | 6.83680665  | 6.7124607   | 6.8575955   | 6.9214315   | 6.7636455   | 6.67034525  |
| "Elp3"      | 6.391213867 | 6.994480133 | 6.8151069   | 6.985336667 | 6.6546553   | 6.523109    | 6.5950651   | 7.089109    |
| "Elp4"      | 3.89764915  | 4.46273205  | 3.9986496   | 4.0343468   | 4.05578135  | 4.03146165  | 3.97817525  | 3.8181394   |
| "Eltd1"     | 7.364057    | 7.320124    | 6.6488659   | 7.149482    | 7.380049    | 8.2601817   | 6.96527685  | 7.4966145   |
| "Emb"       | 2.10222595  | 2.10238755  | 3.1563505   | 2.1161869   | 2.2345345   | 3.2371443   | 2.12038065  | 2.09167845  |
| "Emcn"      | 6.774704    | 6.6475987   | 6.769447    | 7.051019    | 7.160097    | 7.5186844   | 6.9480076   | 6.9943542   |
| "Emd"       | 7.837402    | 7.9966087   | 7.6526294   | 7.719661    | 7.604641    | 7.5958424   | 7.9556947   | 7.7081504   |
| "Emg1"      | 10.306142   | 10.542981   | 10.766415   | 10.5804     | 10.237464   | 10.286945   | 10.970397   | 10.519736   |
| "Emid1"     | 3.7974715   | 5.297694    | 6.2174163   | 6.8933873   | 4.7977686   | 4.779881    | 4.836591    | 5.7373495   |
| "Emilin1"   | 3.37770225  | 3.2462778   | 3.75157365  | 3.19366475  | 3.12753095  | 3.1895784   | 3.36945335  | 3.25747585  |
| "Emilin3"   | 3.009665    | 3.159719    | 3.1895661   | 3.2795138   | 3.3405273   | 3.113384    | 3.1079388   | 3.222065    |
| "Emi3"      | 3.2496016   | 3.3729355   | 4.0914125   | 3.3330777   | 4.1030407   | 4.2368097   | 3.83508     | 3.4168038   |
| "Emi5"      | 2.914242167 | 3.209567733 | 3.051146633 | 3.200245933 | 3.1039446   | 2.981618133 | 3.0609511   | 3.2197804   |
| "Emp1"      | 7.7045956   | 6.40929     | 9.216339    | 8.559139    | 7.837338    | 7.3332      | 8.229189    | 8.624172    |
| "Emp2"      | 5.83802075  | 5.44668265  | 6.2066873   | 4.9789935   | 6.18892385  | 5.609959    | 5.8452155   | 5.6252265   |
| "Emp3"      | 7.431538    | 5.5604935   | 8.808126    | 7.624869    | 7.4245777   | 7.5337687   | 8.069781    | 7.5976357   |
| "Emr1"      | 7.7220535   | 3.9169354   | 6.2114267   | 5.8030014   | 6.017005    | 6.0955844   | 7.0993443   | 5.336959    |
| "Emr4"      | 4.88606385  | 2.49363585  | 2.5267408   | 2.602159    | 2.4795337   | 2.5036453   | 2.5962762   | 2.673947    |
| "En1"       | 2.3172307   | 2.4220777   | 2.3442988   | 2.563669    | 2.3523583   | 2.3109884   | 2.3431835   | 2.4315982   |
| "En2"       | 2.5272396   | 2.6504896   | 2.5634112   | 2.7165718   | 2.5897617   | 2.5318081   | 2.5630739   | 2.686203    |
| "Enah"      | 6.0933959   | 5.182604975 | 5.52814675  | 5.88757875  | 6.053043725 | 5.3520164   | 6.137898375 | 5.98900245  |
| "Enc1"      | 6.6138395   | 4.99682225  | 5.2707932   | 4.6393895   | 6.9718595   | 6.9524655   | 5.062094    | 4.79037035  |
| "Endod1"    | 3.244591775 | 3.26474305  | 3.308454575 | 3.3179297   | 3.24669745  | 3.141302975 | 3.415752875 | 3.3995813   |
| "Endog"     | 9.130112    | 9.016366    | 9.60476     | 9.7637975   | 9.2606625   | 8.5006555   | 9.2028375   | 9.6861095   |
| "Eng"       | 7.4636455   | 7.2008293   | 7.1167326   | 6.860816    | 7.07931485  | 7.4719045   | 6.9743287   | 7.11612135  |
| "Eno1"      | 8.349992667 | 7.940971533 | 8.278813833 | 8.119077833 | 8.0919505   | 7.806998    | 8.845416667 | 7.8847598   |
| "Eno2"      | 2.9045672   | 2.9833274   | 2.9613245   | 3.0402493   | 2.956009    | 2.8372948   | 2.9613516   | 3.03101     |
| "Eno3"      | 14.805336   | 15.225675   | 15.36955    | 15.354851   | 15.129945   | 15.010503   | 14.946325   | 15.240955   |
| "Enoph1"    | 5.132703    | 5.21784035  | 5.86066225  | 6.3012702   | 5.2402835   | 5.14831665  | 5.77632     | 6.18990125  |
| "Enox2"     | 6.70955835  | 8.43177665  | 5.64516235  | 5.9792775   | 6.6226615   | 7.3477273   | 5.77619025  | 5.6716668   |
| "Enpep"     | 7.9982724   | 5.7932086   | 8.070615    | 7.5065217   | 7.854924    | 7.067744    | 8.488691    | 7.956338    |
| "Enpp1"     | 3.57094705  | 2.89980805  | 3.4331374   | 3.3110051   | 3.0917121   | 3.0959759   | 2.8823912   | 3.1520097   |
| "Enpp2"     | 5.946632    | 5.489936    | 6.37702205  | 6.2952151   | 6.3693623   | 6.787946    | 6.1524782   | 6.29334275  |
| "Enpp3"     | 3.9951357   | 3.41115695  | 3.7249919   | 3.838399425 | 3.87716205  | 3.394568725 | 3.629057125 | 3.919112725 |
| "Enpp4"     | 6.9804616   | 7.044344    | 7.3118787   | 7.568803    | 6.9951143   | 6.5563836   | 7.3418093   | 7.356463    |
| "Enpp5"     | 4.4281106   | 4.857819    | 5.72942     | 5.486143    | 5.613426    | 5.339355    | 6.049       | 5.4167643   |
| "Ensa"      | 8.00214235  | 8.6814666   | 8.579942    | 8.64715115  | 8.10069115  | 8.134835    | 8.05984665  | 8.432137    |
| "Entpd1"    | 5.4609413   | 4.6053596   | 4.476977    | 4.664717    | 4.625569    | 4.651533    | 4.6257763   | 4.666857    |
| "Entpd2"    | 6.3296576   | 6.4648232   | 7.775526    | 7.5363154   | 7.6353383   | 7.3952637   | 7.1757345   | 6.9923673   |
| "Entpd4"    | 8.353037    | 8.495354    | 9.831607    | 10.057246   | 8.6575135   | 8.14836325  | 8.6539325   | 9.377372    |
| "Entpd5"    | 4.540197925 | 3.22515565  | 3.6250027   | 3.571921375 | 3.6052372   | 4.019748875 | 3.98628295  | 3.6766178   |
| "Entpd6"    | 2.5752916   | 3.038235    | 2.5966997   | 2.6033134   | 2.6855907   | 2.5736408   | 2.557998    | 2.6443448   |
| "Entpd7"    | 2.50563675  | 2.6155493   | 2.5501784   | 2.6252645   | 2.5471575   | 2.5116509   | 2.5463478   | 2.62665715  |
| "Eny2"      | 6.622591375 | 6.520693075 | 6.301497825 | 6.6425264   | 6.357097175 | 6.3155952   | 6.496189825 | 6.495960475 |
| "Eogt"      | 5.2138155   | 4.73630025  | 5.3949052   | 5.48667915  | 5.2371552   | 5.14654945  | 5.29038765  | 5.5341134   |
| "Eomes"     | 2.6601932   | 2.77462935  | 2.68311335  | 2.75624615  | 2.68481425  | 2.69031025  | 2.6901355   | 2.7626401   |
| "Ep400"     | 6.8554378   | 7.2992387   | 6.800053    | 6.098101    | 7.048599    | 7.3026214   | 6.790487    | 6.7183      |
| "Epas1"     | 2.884243    | 2.277019    | 2.2125418   | 2.3489065   | 2.4331074   | 2.365457    | 2.2289534   | 2.3706803   |
| "Epb4.1"    | 8.022601    | 8.402187    | 8.403581    | 8.369145    | 8.325425    | 8.125374    | 8.095927    | 8.388688    |
| "Epb4.1i1"  | 2.6588011   | 2.58859125  | 2.78318335  | 2.71797435  | 2.83781025  | 2.7793369   | 3.0300406   | 2.7592492   |
| "Epb4.1i2"  | 4.6635141   | 4.424072233 | 4.9433743   | 4.76819     | 4.979914067 | 4.815936233 | 4.9891144   | 4.8860674   |
| "Epb4.1i3"  | 2.75806905  | 2.21859465  | 2.2366447   | 2.2246682   | 2.5879005   | 2.51281935  | 2.5968795   | 2.21995585  |
| "Epb4.1i4a" | 2.0343223   | 2.379537    | 2.3642476   | 2.4528692   | 2.364408    | 2.3121269   | 2.415597    | 2.4450195   |
| "Epb4.1i4b" | 3.54978625  | 3.7127407   | 3.50803495  | 3.6614751   | 3.4919122   | 3.09137175  | 3.37783615  | 3.370769    |
| "Epb4.1i5"  | 3.372523    | 2.7870097   | 2.7472818   | 2.7227397   | 2.6671045   | 2.5195572   | 2.6437263   | 2.7160459   |

|            |             |             |             |             |             |             |             |             |
|------------|-------------|-------------|-------------|-------------|-------------|-------------|-------------|-------------|
| "Epb4.2"   | 2.82476     | 3.1412804   | 2.972798    | 3.1434016   | 3.002461    | 2.9115114   | 2.9503496   | 3.090035    |
| "Epc1"     | 8.668863    | 9.134477    | 8.888451    | 8.535346    | 9.260331    | 9.504815    | 8.78816     | 8.759765    |
| "Epcam"    | 2.4216046   | 2.4599836   | 2.977407    | 2.5232615   | 2.439317    | 2.420269    | 2.4231467   | 2.5080748   |
| "Epdrl1"   | 7.5579138   | 7.504192    | 8.05531725  | 8.25230015  | 8.20771325  | 7.492509    | 7.83689415  | 8.1884815   |
| "Epha1"    | 2.558589    | 2.651804    | 2.6137404   | 2.7107558   | 2.6154404   | 2.5946755   | 2.6111166   | 2.6888576   |
| "Epha2"    | 3.408378    | 3.4097054   | 3.4124525   | 3.447634    | 3.3372235   | 3.3949125   | 3.4057152   | 3.4406567   |
| "Epha3"    | 2.5461971   | 2.741535    | 2.780947833 | 2.732130667 | 2.612644567 | 2.567852667 | 2.5902667   | 2.716006033 |
| "Epha4"    | 3.29138205  | 3.4184189   | 3.5957258   | 3.4664616   | 3.3196114   | 3.28333015  | 3.33216495  | 3.26881145  |
| "Epha5"    | 2.7147565   | 2.810999    | 2.7535644   | 2.874599    | 2.7559469   | 2.7340195   | 2.7613719   | 2.8457742   |
| "Epha7"    | 2.543366633 | 2.680428833 | 2.6241463   | 2.8512914   | 2.6233166   | 2.5617029   | 2.619359333 | 2.8239388   |
| "Ephb2"    | 2.3455747   | 2.4442875   | 2.419408267 | 2.4967424   | 2.384410767 | 2.357705933 | 2.3836485   | 2.4756797   |
| "Ephb3"    | 2.5693538   | 2.5404148   | 2.6974835   | 2.6588273   | 2.532682    | 2.5658205   | 2.5291142   | 2.676489    |
| "Ephb4"    | 3.3173974   | 3.337933    | 3.3297923   | 3.3115196   | 3.3300798   | 3.3483522   | 3.329187    | 3.4007752   |
| "Ephx1"    | 7.8451157   | 6.753192    | 7.617922    | 7.8107333   | 7.802564    | 7.6131153   | 7.81143     | 7.9817085   |
| "Ephx2"    | 10.038347   | 7.5349836   | 8.442148    | 8.6473055   | 9.725436    | 10.291761   | 9.407173    | 9.020771    |
| "Epm2aip1" | 2.7298365   | 3.1823807   | 2.5917494   | 2.6636634   | 2.5906632   | 2.5587847   | 2.6019988   | 2.6272006   |
| "Epn1"     | 3.6108074   | 4.009287    | 3.8347015   | 4.733617    | 3.8150756   | 3.6512957   | 3.8264663   | 3.9628963   |
| "Epn2"     | 5.51809775  | 6.09855485  | 6.1976787   | 5.84306875  | 6.048468    | 5.695567    | 6.2815518   | 5.97281885  |
| "Epor"     | 2.3485844   | 2.4930534   | 2.3772304   | 2.4120011   | 2.3827336   | 2.3622074   | 2.376578    | 2.4143007   |
| "Eppk1"    | 3.7566233   | 2.3541975   | 3.9274461   | 1.8336053   | 2.4727714   | 2.7124119   | 2.4682667   | 1.770557    |
| "Eprs"     | 11.05297533 | 11.160927   | 10.6784367  | 11.162456   | 11.010906   | 11.05645933 | 10.90931617 | 11.20047967 |
| "Eps15"    | 7.3141165   | 7.28352     | 7.185469    | 7.5419162   | 7.0136128   | 7.43475425  | 7.4618745   | 7.32089875  |
| "Eps15l1"  | 4.631276    | 5.082042    | 4.816443    | 5.021198    | 5.14898935  | 5.3360218   | 4.9974606   | 4.90918205  |
| "Eps8"     | 4.853623367 | 5.0425202   | 5.173970833 | 5.100788833 | 5.173930367 | 5.106735433 | 5.131170133 | 5.102345533 |
| "Eps8l1"   | 3.4725227   | 2.4741087   | 2.371454    | 2.4005601   | 2.5341332   | 3.5428243   | 2.3159423   | 2.4023952   |
| "Eps8l2"   | 2.6841998   | 2.852522    | 2.6887681   | 2.6772609   | 2.6254272   | 2.6066003   | 2.6194866   | 2.5104554   |
| "Epsti1"   | 2.81785685  | 2.52653375  | 2.77947405  | 2.58487605  | 2.58186985  | 5.2571325   | 2.76667045  | 2.575452    |
| "Epyc"     | 2.7909193   | 2.9982982   | 2.9345171   | 2.9983172   | 2.9059496   | 2.7844768   | 2.9343555   | 3.019971    |
| "Eral1"    | 5.61997766  | 6.01835704  | 5.65887494  | 5.73405662  | 5.74979166  | 5.63400166  | 5.9990918   | 5.77415242  |
| "Erap1"    | 5.5676904   | 4.7565403   | 5.056505    | 4.6706114   | 5.979155    | 5.843152    | 5.5125713   | 4.884167    |
| "Eras"     | 2.9277783   | 3.1569757   | 3.033233    | 3.2134635   | 3.0453875   | 2.9311097   | 3.0144076   | 3.1681275   |
| "Erbb2"    | 2.8227167   | 2.7693026   | 2.8267984   | 2.8825216   | 2.884727    | 2.5993526   | 3.0562396   | 2.8338423   |
| "Erbb2ip"  | 8.074356    | 8.696173833 | 6.594094667 | 6.667786433 | 7.3744421   | 7.387579267 | 7.0837474   | 6.7724026   |
| "Erbb3"    | 5.0784338   | 3.77739335  | 4.1470189   | 3.97332095  | 4.5464835   | 3.6744355   | 4.0922819   | 4.0886601   |
| "Erbb4"    | 3.231042    | 3.5609329   | 3.3604846   | 3.5657055   | 3.3663247   | 3.2692013   | 3.335478    | 3.4972785   |
| "Erc1"     | 3.535994333 | 3.559815267 | 3.835277    | 4.020860033 | 3.5575623   | 3.337060933 | 3.608577767 | 3.9539502   |
| "Ercc1"    | 7.9768496   | 8.510771    | 7.905594    | 7.847356    | 7.90107     | 8.457902    | 7.971948    | 7.7914567   |
| "Ercc3"    | 6.1427145   | 6.454921    | 6.0665264   | 6.09144     | 6.065846    | 6.315052    | 6.1712546   | 6.100765    |
| "Ercc4"    | 2.40377245  | 2.56331545  | 2.53182125  | 2.62489665  | 2.7166065   | 2.5286352   | 2.5552095   | 2.605461    |
| "Ercc5"    | 8.574747    | 8.333483    | 7.7385435   | 7.546268    | 8.628482    | 8.390371    | 7.7476754   | 7.668086    |
| "Ercc8"    | 2.890887033 | 3.1118676   | 3.053621    | 3.0227887   | 2.947476267 | 2.885452267 | 2.909462167 | 2.926211767 |
| "Erdr1"    | 9.488832    | 9.889244    | 8.8292265   | 7.4421206   | 9.6976795   | 9.494936    | 9.896908    | 8.434363    |
| "Ereg"     | 3.0217454   | 3.1761625   | 3.0941017   | 3.1150901   | 3.0222347   | 2.9873672   | 2.9760792   | 3.1075854   |
| "Erf"      | 3.31464925  | 2.72719235  | 2.8509802   | 2.90604175  | 2.8785547   | 2.62024085  | 2.99664115  | 2.9017726   |
| "Ergic1"   | 5.114027525 | 5.305723175 | 6.08264115  | 6.4881445   | 5.353816075 | 4.91284235  | 6.281476875 | 5.8465842   |
| "Ergic2"   | 7.0416708   | 7.674632233 | 8.002599    | 8.216615233 | 7.306333233 | 7.196505833 | 7.7583022   | 8.091246667 |
| "Ergic3"   | 7.178652133 | 6.9144586   | 7.5125623   | 7.240570667 | 7.265424    | 6.800030033 | 7.683080467 | 7.491349267 |
| "Erh"      | 9.073705    | 9.027076    | 9.467042    | 9.392372    | 8.897933    | 9.090586    | 9.436684    | 9.252756    |
| "Eri1"     | 4.5381484   | 4.6697567   | 4.3229456   | 4.4464975   | 5.04204835  | 5.0044163   | 4.55711635  | 4.43957435  |
| "Eri2"     | 2.91502125  | 3.0891695   | 3.1537825   | 3.2565646   | 3.08881585  | 2.9806302   | 3.1519953   | 3.201087    |
| "Eri3"     | 6.6141534   | 7.351403    | 7.1003428   | 7.110924    | 6.5043235   | 6.60234     | 6.932073    | 6.968102    |
| "Erlec1"   | 6.48827725  | 6.5097305   | 6.5402183   | 6.433075    | 6.5640963   | 6.3570437   | 6.41494215  | 6.4551934   |
| "Erlin1"   | 5.0343523   | 3.8986628   | 4.9840784   | 4.435961    | 5.124403    | 5.4689817   | 5.3436465   | 4.846648    |
| "Ermp1"    | 5.9907994   | 6.0026274   | 6.968468    | 6.830051    | 7.3022676   | 7.672619    | 7.2509146   | 6.837237    |
| "Ernl1"    | 2.4039087   | 2.4698853   | 2.4248295   | 2.5200548   | 2.4327974   | 2.4072165   | 2.4332047   | 2.5169678   |
| "Erol1"    | 3.628789167 | 3.348676133 | 3.4321977   | 3.551693667 | 3.6301182   | 3.6136582   | 3.555477433 | 3.5205946   |
| "Erol1b"   | 6.480227    | 5.2208104   | 5.0695515   | 5.124802    | 5.2459846   | 6.5258374   | 5.3470454   | 5.202579    |
| "Erp29"    | 7.9987135   | 7.5246005   | 8.050614    | 7.9432445   | 8.003537    | 7.979543    | 8.179356    | 7.964232    |
| "Erp44"    | 7.2257337   | 7.4172987   | 7.681416    | 8.015267    | 7.4184606   | 7.2647782   | 7.4755645   | 7.8104277   |
| "Errfi1"   | 11.6084635  | 10.7443135  | 7.4029807   | 7.9082185   | 9.480609    | 10.792747   | 8.5068984   | 7.5796792   |
| "Esam"     | 7.8948307   | 7.982898    | 7.924515    | 7.905929    | 8.4486685   | 8.518819    | 8.182209    | 8.136659    |
| "Esco1"    | 6.912412    | 7.41389715  | 7.3414172   | 7.483622    | 7.32494715  | 7.2636195   | 7.2690517   | 7.6698847   |
| "Esd"      | 11.632791   | 10.515412   | 10.886897   | 10.772549   | 10.766644   | 10.720398   | 11.477124   | 10.702502   |
| "Esf1"     | 7.7364605   | 8.287969    | 7.9819414   | 8.13056975  | 8.147264    | 7.85538525  | 7.71722     | 8.2074045   |
| "Esm1"     | 3.031393    | 3.315294    | 3.1504335   | 3.3359296   | 3.1596277   | 3.0583537   | 3.5180347   | 3.2856536   |
| "Espn"     | 2.7457235   | 2.9405756   | 2.8151786   | 2.9721007   | 2.81592     | 2.7959073   | 2.8111696   | 2.9376798   |
| "Esrp2"    | 3.5058801   | 2.9415148   | 3.13231325  | 2.98676375  | 2.9109739   | 2.8480728   | 2.73791895  | 2.9722136   |
| "Esrra"    | 7.6770034   | 7.5051665   | 7.689499    | 8.748431    | 8.037126    | 7.2649674   | 7.6964855   | 8.725766    |
| "Esrrb"    | 2.8306358   | 2.5606644   | 2.5123723   | 2.609059    | 2.5928776   | 2.489109    | 2.4632292   | 2.6760387   |
| "Esx1"     | 2.6276398   | 2.721078    | 2.6969252   | 2.8471415   | 2.7050328   | 2.6348307   | 2.6908305   | 2.7687678   |
| "Esyt1"    | 6.8603997   | 6.47454     | 7.0393763   | 6.4880786   | 7.00568     | 7.147363    | 7.399233    | 6.436447    |
| "Esyt3"    | 2.5137632   | 2.5956156   | 3.7363214   | 2.6847763   | 3.0141377   | 2.5390027   | 2.585232    | 2.6401231   |
| "Etaa1"    | 3.817983    | 3.4385655   | 3.3838968   | 3.6000235   | 3.4144998   | 3.8463972   | 3.352912    | 3.5015228   |
| "Etf1"     | 7.03520386  | 7.23416142  | 6.87526502  | 7.13732194  | 6.90729998  | 6.97960586  | 7.38517594  | 7.1491573   |
| "Etf2"     | 12.028511   | 11.606014   | 11.95739    | 12.021273   | 12.42215    | 12.103053   | 12.101485   | 12.212958   |
| "Etfb"     | 11.053111   | 10.821783   | 11.249182   | 11.091323   | 11.423262   | 10.843603   | 11.435976   | 11.181369   |
| "Etfdh"    | 10.731299   | 10.569126   | 10.413638   | 10.661876   | 11.393018   | 10.836202   | 10.521246   | 11.067379   |
| "Eth1"     | 8.280487    | 7.9464726   | 8.235773    | 8.52052     | 8.110173    | 7.8410387   | 8.321133    | 8.495325    |
| "Et14"     | 6.842208    | 7.5430615   | 6.7294303   | 7.5107373   | 7.333087    | 6.8630118   | 6.13508725  | 7.7724739   |
| "Etnk1"    | 4.651899233 | 4.571457767 | 4.82822067  | 4.928565433 | 4.849311833 | 4.935853867 | 4.859257233 | 4.847131067 |
| "Etohd2"   | 4.095578    | 4.1275544   | 4.0140176   | 4.209606    | 4.107234    | 4.087149    | 3.9623108   | 4.164426    |

|            |             |             |             |             |             |             |             |             |
|------------|-------------|-------------|-------------|-------------|-------------|-------------|-------------|-------------|
| "Ets1"     | 5.616432233 | 5.498444767 | 6.211624667 | 6.500847667 | 6.071448567 | 7.029481667 | 6.306760433 | 6.506208067 |
| "Ets2"     | 10.41289    | 10.55069    | 9.820698    | 9.677266    | 10.227611   | 10.149156   | 10.01884    | 9.822196    |
| "Etv1"     | 3.3956388   | 3.359507    | 3.69402595  | 4.05562065  | 3.4854211   | 3.4727157   | 3.24151675  | 3.97961095  |
| "Etv3"     | 4.6971655   | 5.2718515   | 4.4299507   | 4.433894167 | 5.2082692   | 5.688224967 | 4.668469267 | 4.753290033 |
| "Etv5"     | 2.46682015  | 2.5324972   | 2.4876661   | 2.58773265  | 2.4763342   | 2.3159661   | 2.4886911   | 2.53899635  |
| "Evc"      | 3.693454    | 2.98622435  | 3.30464545  | 3.57248235  | 3.36096535  | 3.2410895   | 3.2621283   | 3.55025325  |
| "Evi2a"    | 3.7585352   | 2.66902495  | 4.37957565  | 4.2426696   | 3.79369045  | 3.99929275  | 4.44418675  | 4.08810805  |
| "Evi2b"    | 2.5237365   | 2.5731757   | 2.5615635   | 2.6150887   | 2.5699918   | 4.9105124   | 3.0635865   | 2.6177242   |
| "Evi5"     | 9.0917795   | 8.256773    | 8.0124933   | 8.082645    | 8.260472    | 8.5137532   | 8.2394105   | 8.2390235   |
| "Evl"      | 5.2002805   | 5.2384233   | 4.97609355  | 5.12760925  | 4.49123455  | 6.041068    | 5.16663025  | 5.38936905  |
| "Evpl"     | 2.2559578   | 2.3453805   | 2.4165013   | 2.4025667   | 2.3270943   | 2.4160755   | 2.2799478   | 2.3927147   |
| "Ewsr1"    | 6.268153267 | 7.0088674   | 6.396262133 | 6.448152    | 6.824658067 | 6.792986367 | 6.464678667 | 6.468162133 |
| "Exd2"     | 5.115595    | 4.1785946   | 6.612458    | 6.8197885   | 4.967594    | 4.629907    | 6.6080356   | 6.704412    |
| "Exoc1"    | 5.898116    | 6.3447337   | 6.052953    | 5.679988    | 5.890767    | 5.8697653   | 5.8508816   | 6.066123    |
| "Exoc4"    | 6.13765634  | 6.78095804  | 6.62751172  | 6.85572642  | 6.28999606  | 6.22811118  | 6.19156638  | 6.69176588  |
| "Exoc6"    | 8.502258075 | 8.828990675 | 8.551224825 | 8.854781325 | 8.5743651   | 8.06936775  | 8.7609357   | 8.7966261   |
| "Exoc7"    | 7.6102896   | 7.9294996   | 9.007621    | 9.003244    | 8.401318    | 7.8443117   | 8.804645    | 8.636044    |
| "Exoc8"    | 5.3449883   | 5.469304    | 5.496791    | 6.0125966   | 5.495307    | 5.521382    | 5.4816613   | 5.627323    |
| "Exosc1"   | 5.227073    | 5.52658505  | 5.000983    | 5.1085956   | 5.2143216   | 5.2938224   | 5.3214279   | 5.0579825   |
| "Exosc10"  | 5.716538475 | 6.292838525 | 5.66493025  | 5.8569286   | 6.244844625 | 6.1036488   | 5.691289525 | 5.813203525 |
| "Exosc2"   | 5.5031486   | 5.464388    | 5.4590664   | 5.4293823   | 5.441005    | 5.6450768   | 5.426491    | 5.4909925   |
| "Exosc4"   | 6.775582933 | 7.0769361   | 6.796037433 | 6.956402633 | 6.794983567 | 6.799963633 | 6.929624    | 6.818186333 |
| "Exosc5"   | 5.6560874   | 5.980049    | 5.5477332   | 5.5295477   | 5.49451547  | 5.452162    | 6.3498664   | 5.578741    |
| "Exosc7"   | 8.306349    | 8.424862    | 8.378761    | 8.466823    | 8.394878    | 8.178539    | 8.330702    | 8.459478    |
| "Exosc8"   | 4.339984    | 4.510473    | 4.4963007   | 4.483863    | 4.5074306   | 4.5061803   | 4.514533    | 5.1071634   |
| "Exosc9"   | 8.081581    | 8.63185     | 8.174457    | 8.264399    | 8.170602    | 8.052167    | 8.197848    | 8.295282    |
| "Ext1"     | 7.3534913   | 5.5906487   | 6.494825    | 6.2143264   | 6.364401    | 6.0724874   | 6.2824063   | 6.4542      |
| "Ext2"     | 6.2428465   | 6.818885    | 7.0084224   | 6.9555306   | 6.800225    | 6.274776    | 7.0097184   | 6.823068    |
| "Extl1"    | 6.7594776   | 6.900321    | 6.8243103   | 7.1910343   | 7.159074    | 6.236039    | 6.9121046   | 6.982745    |
| "Extl2"    | 5.4647756   | 6.03241975  | 6.664804    | 6.6116576   | 6.16423075  | 4.752614    | 6.22181345  | 6.3763978   |
| "Extl3"    | 7.296823    | 7.654984    | 7.9647846   | 7.9654107   | 7.925372    | 7.662483    | 7.976761    | 7.9867077   |
| "Eya3"     | 3.4720347   | 3.7148707   | 3.3655949   | 3.498854    | 3.4455175   | 3.4306788   | 3.4707928   | 3.46014     |
| "Eya4"     | 2.6664202   | 2.780669    | 2.677658    | 2.839672    | 2.6805472   | 2.7074103   | 2.6831942   | 2.7680836   |
| "Ezh1"     | 6.31094325  | 7.05334585  | 5.9278325   | 6.20686975  | 6.63694645  | 6.64395365  | 6.2042398   | 6.2694745   |
| "Ezh2"     | 4.9375734   | 5.5612907   | 5.5579195   | 5.831757    | 5.556992    | 5.8085904   | 5.490428    | 5.5785165   |
| "Ezr"      | 5.1041935   | 4.031807    | 5.0246287   | 4.1258551   | 4.1409489   | 5.45376     | 4.33606565  | 4.3750036   |
| "F10"      | 6.050769333 | 2.49797     | 2.504677167 | 2.5473004   | 2.442282033 | 2.479179133 | 2.430000667 | 2.524062933 |
| "F11"      | 4.043265    | 2.483352    | 2.444021    | 2.5593305   | 2.4436686   | 2.3976383   | 2.4402208   | 2.5334973   |
| "F11r"     | 4.1369348   | 3.7274951   | 3.69722975  | 3.6335087   | 3.8093419   | 3.8425647   | 3.7407754   | 3.7861732   |
| "F12"      | 7.7662754   | 2.3752646   | 2.3555422   | 2.4203095   | 2.355028    | 2.3020647   | 2.330558    | 2.421941    |
| "F13a1"    | 8.081537    | 5.7376394   | 9.225872    | 7.51229     | 9.183208    | 9.244247    | 9.054886    | 8.228268    |
| "F13b"     | 8.382931    | 2.3383822   | 2.3421984   | 2.398415    | 2.323714    | 2.2430487   | 2.2794733   | 2.3881066   |
| "F2"       | 10.742943   | 2.4920893   | 2.9806874   | 2.5098355   | 2.5466545   | 2.3836734   | 2.4007294   | 3.0314908   |
| "F2r"      | 8.253455    | 6.87063265  | 7.398793    | 7.378253    | 7.6325905   | 7.6727755   | 7.3617578   | 7.70152865  |
| "F2rl3"    | 2.1368163   | 2.229813    | 2.3907492   | 2.2767286   | 2.1956847   | 2.17118     | 2.2151532   | 2.274282    |
| "F3"       | 6.235622    | 5.8252606   | 6.9324617   | 6.84609     | 5.8634624   | 6.1633925   | 6.432943    | 7.288954    |
| "F5"       | 8.56780915  | 2.6658609   | 2.6421384   | 2.71114515  | 2.64914795  | 2.5993655   | 2.6335078   | 2.8511745   |
| "F7"       | 6.248997    | 1.8191268   | 1.8178599   | 1.8659925   | 1.8153844   | 1.7827706   | 1.8029091   | 1.8657614   |
| "F8"       | 2.327258    | 2.1941652   | 2.2331305   | 2.3087168   | 2.240709    | 2.8700705   | 2.2415128   | 2.2225373   |
| "F8a"      | 4.7321825   | 5.4903917   | 4.8801003   | 5.08813     | 5.286724    | 4.1521993   | 4.0610223   | 4.587865    |
| "F9"       | 8.691565    | 1.9674864   | 1.9482927   | 1.9919951   | 1.9323701   | 1.9086045   | 1.9292727   | 2.01224     |
| "Fa2h"     | 3.8635535   | 4.178339    | 4.1670375   | 3.5314412   | 4.340647    | 3.7201009   | 3.1907885   | 4.0378327   |
| "Fabp1"    | 10.4260475  | 2.975338    | 7.42258185  | 3.0784324   | 5.5053257   | 2.74999625  | 3.3348172   | 6.955609    |
| "Fabp2"    | 2.8977096   | 2.4459224   | 2.3954456   | 2.509688    | 2.3997593   | 2.3560834   | 2.3951745   | 2.4927835   |
| "Fabp3"    | 13.06709    | 12.275079   | 12.361714   | 12.977984   | 13.492951   | 12.898252   | 12.645978   | 13.470625   |
| "Fabp4"    | 8.0488034   | 9.4360695   | 10.04272408 | 9.196473575 | 11.1999385  | 11.13073275 | 11.38476675 | 10.31732038 |
| "Fabp5"    | 8.736258    | 6.81255065  | 9.141638    | 8.2840507   | 9.379227    | 9.98257     | 10.7811535  | 8.726127    |
| "Fabp6"    | 2.6936524   | 2.8256264   | 2.7429976   | 2.712113    | 2.740379    | 2.6874757   | 2.7408442   | 2.8853796   |
| "Fabp7"    | 5.605093    | 2.6500218   | 2.6426938   | 2.7058306   | 2.6403003   | 2.4973292   | 2.6195295   | 2.6850462   |
| "Fabp9"    | 2.7867589   | 2.98084435  | 2.8597868   | 3.0243026   | 2.8958352   | 2.7926242   | 2.8581313   | 2.97650565  |
| "Fadd"     | 2.416033    | 2.469959    | 2.495378    | 2.515325    | 2.461098    | 2.4326854   | 2.4380774   | 2.489739    |
| "Fads1"    | 8.154017    | 5.4563646   | 7.11287     | 5.518037    | 6.471324    | 6.108201    | 7.1854525   | 5.3215637   |
| "Fads2"    | 4.7459164   | 3.5446246   | 3.7611399   | 3.6602714   | 3.5207918   | 3.3298926   | 3.5204875   | 3.5966635   |
| "Fads3"    | 2.4974842   | 2.47015555  | 2.6181283   | 2.5837361   | 3.7155638   | 2.8605381   | 3.39941075  | 2.611934    |
| "Faf1"     | 8.0764995   | 8.334951    | 8.04235575  | 8.4898375   | 8.0141995   | 8.0415697   | 8.5665842   | 8.2101335   |
| "Fah"      | 9.2535305   | 4.889224    | 5.8023357   | 3.849121    | 6.72468     | 7.0807014   | 5.9406796   | 4.612019    |
| "Fahd1"    | 7.734179    | 7.966998    | 8.158618    | 8.253235    | 8.020543    | 6.9138107   | 8.026132    | 8.041382    |
| "Faim"     | 4.8368664   | 3.8617346   | 4.558588    | 4.3130727   | 5.130323    | 4.911968    | 5.253691    | 4.9670715   |
| "Fam100a"  | 4.0030465   | 4.714568    | 4.0440207   | 4.059821    | 4.2716727   | 4.7735376   | 3.7905073   | 3.8542495   |
| "Fam100b"  | 9.876168    | 10.972669   | 10.038468   | 10.16541    | 10.41647    | 10.422501   | 9.609697    | 10.00872    |
| "Fam101b"  | 7.305888    | 6.4720297   | 8.307804    | 7.559375    | 7.236191    | 7.917037    | 7.2268987   | 7.977094    |
| "Fam102a"  | 3.530087    | 3.85964475  | 4.0291221   | 4.3003533   | 4.00706085  | 4.4222999   | 4.08366235  | 4.40131595  |
| "Fam103a1" | 9.573305    | 10.271575   | 9.362843    | 9.443305    | 9.686456    | 9.878281    | 9.51338     | 9.472132    |
| "Fam105a"  | 3.092693    | 3.0045133   | 3.031025    | 3.0889454   | 3.3386235   | 5.1408577   | 3.0564342   | 3.0854135   |
| "Fam105b"  | 8.96059     | 8.534747    | 6.6935787   | 7.1651063   | 7.7423186   | 8.281024    | 7.644179    | 7.080404    |
| "Fam107b"  | 4.469563367 | 3.617887233 | 3.9944368   | 3.5914429   | 3.794120933 | 5.245054667 | 3.888311467 | 3.91146     |
| "Fam108a"  | 8.725138    | 9.0180645   | 9.182839    | 8.985405    | 8.566634    | 8.688499    | 8.886038    | 8.813444    |
| "Fam108c"  | 7.5276423   | 5.320152    | 4.9905863   | 5.106932    | 5.2050014   | 4.8118      | 5.939295    | 4.996456    |
| "Fam109b"  | 2.8049533   | 3.0970812   | 3.1800776   | 3.1849875   | 3.0314226   | 2.967297    | 2.9638963   | 3.119687    |
| "Fam111a"  | 3.7676823   | 4.0569844   | 4.822099    | 4.535226    | 4.9152684   | 6.0358276   | 5.1371756   | 4.7736926   |
| "Fam114a1" | 4.0379952   | 3.743017    | 5.647976    | 5.0378383   | 4.2389907   | 3.92594955  | 4.3542072   | 4.6632948   |

|            |             |             |             |             |             |             |             |             |
|------------|-------------|-------------|-------------|-------------|-------------|-------------|-------------|-------------|
| "Fam114a2" | 8.3589195   | 8.9562535   | 8.952114    | 8.894257    | 8.7672105   | 8.72247425  | 8.6780425   | 8.990944    |
| "Fam115c"  | 2.7234232   | 2.796293    | 2.7975175   | 2.8659227   | 2.7491016   | 2.7247543   | 2.7940218   | 2.844047    |
| "Fam116a"  | 3.9058332   | 4.0252358   | 4.26670275  | 4.3956848   | 4.3791497   | 4.1492051   | 4.27358     | 4.44829515  |
| "Fam117a"  | 4.894046    | 4.776582    | 6.368231    | 6.3020124   | 6.657695    | 6.729451    | 6.823424    | 6.907399    |
| "Fam117b"  | 6.656011    | 7.0138226   | 5.827992    | 5.4536314   | 6.961101    | 7.4775877   | 6.1306458   | 5.655141    |
| "Fam118a"  | 5.8488226   | 6.517335    | 6.200174    | 6.447682    | 6.2786255   | 6.2536144   | 6.34352     | 5.823448    |
| "Fam118b"  | 6.14780575  | 6.6510606   | 7.426658    | 7.7023255   | 6.140548    | 6.0517995   | 7.6609824   | 7.32946335  |
| "Fam120a"  | 6.92654305  | 6.819351175 | 6.967104575 | 7.14176475  | 6.915886125 | 6.9043045   | 7.198973575 | 7.0969885   |
| "Fam120b"  | 5.50331685  | 5.539899    | 5.3889462   | 5.5573133   | 5.42940545  | 5.921288    | 5.38538005  | 5.393843    |
| "Fam122a"  | 3.994328467 | 4.394035    | 4.531095033 | 5.253306767 | 3.974414433 | 3.964190633 | 4.8029219   | 4.625101367 |
| "Fam125a"  | 6.326974633 | 6.126969833 | 6.402253567 | 6.373503533 | 6.145693233 | 5.9489002   | 6.597977767 | 6.305990533 |
| "Fam125b"  | 4.962145267 | 5.716134333 | 5.984511433 | 6.1744128   | 5.448950433 | 5.1313162   | 5.7866269   | 6.107812533 |
| "Fam126a"  | 5.7991247   | 5.011531    | 6.2269654   | 6.112762    | 6.337292    | 6.5546207   | 6.3063126   | 6.1701636   |
| "Fam126b"  | 7.0936136   | 7.172653    | 7.60185     | 7.7738433   | 8.537516    | 7.7779427   | 8.434405    | 8.036109    |
| "Fam129a"  | 5.7790046   | 4.056198    | 5.287612    | 5.892147    | 5.398592    | 5.5151987   | 4.7367477   | 6.0261965   |
| "Fam129b"  | 6.3806577   | 5.796812    | 6.2550287   | 5.273978    | 7.16265     | 7.9473486   | 7.0102572   | 5.5192204   |
| "Fam131a"  | 2.278739    | 5.0815716   | 5.734483    | 6.4258175   | 4.7108355   | 4.429515    | 4.245758    | 5.7326784   |
| "Fam131b"  | 2.916025    | 3.1883278   | 3.0293067   | 3.2107239   | 3.043308    | 2.9610295   | 3.0233123   | 3.1644268   |
| "Fam132a"  | 5.79221705  | 6.082314325 | 6.75181665  | 6.51207545  | 6.435270425 | 6.7610944   | 6.839835525 | 6.441323075 |
| "Fam133b"  | 8.153765    | 9.054113    | 8.036154    | 8.197128    | 8.522947    | 9.343158    | 7.964382    | 8.217197    |
| "Fam134a"  | 4.8314896   | 3.9207816   | 3.5418296   | 3.4540095   | 4.301848    | 4.557763    | 3.9182875   | 3.829082    |
| "Fam134b"  | 13.7862445  | 14.332177   | 11.023948   | 11.196276   | 13.55329    | 13.965765   | 11.1856195  | 11.4900835  |
| "Fam134c"  | 6.5991354   | 6.7785215   | 6.4152327   | 6.7752175   | 6.564981    | 7.0262856   | 6.430986    | 6.783105    |
| "Fam136a"  | 8.165278    | 7.5435724   | 8.548026    | 8.566587    | 8.159936    | 7.566297    | 8.9440775   | 8.464116    |
| "Fam13b"   | 7.194261    | 7.0591483   | 7.0101085   | 6.4134417   | 6.7943773   | 7.4650626   | 6.753385    | 6.7836566   |
| "Fam13c"   | 6.5201007   | 8.231846    | 5.3964226   | 6.58747     | 6.7827972   | 7.1680174   | 5.48966035  | 6.42761685  |
| "Fam149b"  | 3.1060836   | 3.2382414   | 3.2311213   | 3.3910425   | 3.3281958   | 3.14831     | 3.1513247   | 3.3919702   |
| "Fam158a"  | 5.7145767   | 5.6293583   | 6.8618      | 6.7987947   | 6.4482307   | 5.559683    | 6.9827914   | 6.595472    |
| "Fam160a2" | 4.27433525  | 4.42997385  | 4.2555307   | 4.4188076   | 4.5220685   | 4.3986156   | 4.26475835  | 4.53237735  |
| "Fam160b1" | 5.00693415  | 4.88472715  | 4.5644745   | 4.5106466   | 4.95478985  | 4.78571295  | 4.5640595   | 4.5422705   |
| "Fam161a"  | 2.4387436   | 2.4826014   | 2.4750667   | 2.5227454   | 2.4734025   | 2.4435694   | 2.470354    | 2.5820637   |
| "Fam162a"  | 10.567903   | 10.363978   | 11.050975   | 11.214921   | 10.530864   | 10.148754   | 11.244791   | 11.136503   |
| "Fam164c"  | 1.9724494   | 2.0211577   | 1.9890119   | 2.0613708   | 1.9898989   | 2.8152409   | 1.9855677   | 2.0570667   |
| "Fam165b"  | 9.113341    | 8.7896805   | 9.4828415   | 9.66599     | 8.876189    | 8.624139    | 10.043111   | 9.365537    |
| "Fam166a"  | 2.6727724   | 2.7173722   | 2.6944876   | 2.7657473   | 2.6933537   | 2.6725976   | 2.6919699   | 2.7648716   |
| "Fam169a"  | 2.2359579   | 2.3244193   | 2.2507231   | 2.4587252   | 2.2590795   | 2.3141866   | 2.256929    | 2.356407    |
| "Fam173a"  | 8.74964     | 8.575317    | 9.146124    | 9.144644    | 8.814131    | 8.554803    | 9.19765     | 9.097403    |
| "Fam174a"  | 7.197049    | 8.128483    | 8.4266005   | 8.887885    | 8.08569915  | 7.309469    | 8.3757325   | 8.57446425  |
| "Fam174b"  | 3.1071687   | 3.1360478   | 3.1241636   | 3.1912274   | 3.1143675   | 3.3967376   | 3.1220887   | 3.19723     |
| "Fam176a"  | 6.29717     | 3.2530127   | 3.1116      | 3.3586578   | 3.183211    | 3.3129559   | 3.2310228   | 3.269098    |
| "Fam178a"  | 6.1890283   | 6.401274    | 6.1916676   | 6.030817    | 6.37202     | 6.9927664   | 6.193269    | 6.2313023   |
| "Fam181b"  | 2.5554063   | 2.6284869   | 2.5783622   | 2.651181    | 2.5961387   | 2.56656     | 2.5964694   | 2.6568363   |
| "Fam188a"  | 7.433367    | 7.586157    | 7.4730277   | 7.537426    | 7.3998747   | 7.709611    | 6.940966    | 7.301142    |
| "Fam189b"  | 4.4251738   | 5.16099     | 5.678256    | 5.880629    | 4.798978    | 4.9988365   | 5.293367    | 5.196773    |
| "Fam18a"   | 3.0924125   | 3.3187668   | 3.128859    | 3.356975    | 3.1313856   | 3.0835245   | 3.1217256   | 3.2753587   |
| "Fam192a"  | 8.269901    | 8.970798    | 8.3439      | 8.37932     | 8.42359     | 8.4000225   | 8.53605     | 8.289499    |
| "Fam193b"  | 6.577702    | 6.9838734   | 6.099351    | 6.1327844   | 6.5587835   | 7.415514    | 6.5871496   | 6.494225    |
| "Fam195a"  | 9.885509    | 9.584244    | 9.679603    | 10.075854   | 9.995878    | 9.342381    | 9.96276     | 9.912747    |
| "Fam195b"  | 5.872397    | 6.54314     | 6.217217    | 5.1556      | 6.1742954   | 6.4726205   | 6.05472     | 5.6389265   |
| "Fam198b"  | 6.633634    | 6.9660535   | 8.22189     | 7.9033456   | 7.576945    | 7.9301186   | 7.4976454   | 7.4088483   |
| "Fam19a5"  | 4.5069733   | 4.7796545   | 4.8457484   | 5.129263    | 4.61852     | 4.608175    | 4.604089    | 5.4455714   |
| "Fam20b"   | 5.31161535  | 5.784579    | 5.771767    | 6.3698125   | 5.35334675  | 5.45983375  | 5.54180575  | 5.82249025  |
| "Fam20c"   | 6.0463667   | 5.6230845   | 6.458317    | 6.0252786   | 5.5248466   | 5.110743    | 5.55384     | 5.8941865   |
| "Fam26e"   | 4.2740455   | 4.3910785   | 4.4461923   | 4.439093    | 4.2370872   | 4.004118    | 4.3671193   | 4.9389715   |
| "Fam32a"   | 5.5405513   | 5.92126915  | 5.7173628   | 5.38861615  | 5.61716435  | 6.626827    | 5.6692235   | 5.12366865  |
| "Fam33a"   | 3.11335425  | 3.24347635  | 3.4098252   | 3.77213205  | 3.39775825  | 3.0772395   | 3.92493025  | 3.77234555  |
| "Fam36a"   | 9.900888    | 10.05825    | 10.039444   | 10.193588   | 9.93829     | 9.533815    | 10.521257   | 9.940918    |
| "Fam3b"    | 2.3856826   | 2.4812858   | 2.421555    | 2.5440288   | 2.4319172   | 2.390762    | 2.4253693   | 2.5305533   |
| "Fam3c"    | 6.8584283   | 6.18894745  | 7.598251    | 7.0949625   | 6.7117665   | 6.83661425  | 7.238949    | 7.2114875   |
| "Fam43a"   | 5.274409    | 5.18318     | 5.3071947   | 5.5451446   | 5.284523    | 5.6027613   | 5.4214497   | 5.6736817   |
| "Fam45a"   | 6.3892016   | 6.272395    | 6.8817472   | 6.833493    | 7.0626063   | 6.704841    | 7.0213246   | 6.9635715   |
| "Fam46c"   | 3.4030359   | 3.3744655   | 2.494975    | 2.6045928   | 3.0032213   | 4.6927366   | 2.6289954   | 3.6399362   |
| "Fam48a"   | 4.43058385  | 4.50467155  | 4.60171595  | 4.6086645   | 4.5250113   | 4.6951239   | 4.4578539   | 4.68664625  |
| "Fam49b"   | 7.638653    | 6.1056666   | 7.6769347   | 7.4162784   | 6.8660808   | 8.06803     | 7.7164316   | 7.4685287   |
| "Fam50a"   | 8.203427    | 8.186232    | 8.2214155   | 8.125492    | 8.209508    | 8.39831     | 8.261875    | 8.316996    |
| "Fam53a"   | 7.4982996   | 7.984692    | 8.620882    | 8.986591    | 7.891178    | 7.774809    | 8.30361     | 8.626703    |
| "Fam53c"   | 6.6844726   | 6.9172163   | 6.973806    | 6.916186    | 7.0919294   | 7.0433917   | 7.1434836   | 6.8615108   |
| "Fam54b"   | 8.159505    | 8.637829667 | 8.777554    | 9.020011167 | 8.489125333 | 8.194196333 | 8.656846767 | 8.869739667 |
| "Fam58b"   | 6.08755     | 6.7414103   | 7.03692     | 7.106626    | 6.2318053   | 5.980585    | 6.927452    | 7.1261816   |
| "Fam60a"   | 2.5094552   | 2.6115375   | 2.5634768   | 2.6442606   | 2.536108    | 2.7584543   | 2.5490172   | 2.6403131   |
| "Fam63a"   | 8.798923    | 10.0780515  | 7.614097    | 7.621371125 | 9.1867564   | 9.7713235   | 7.659069775 | 7.759002825 |
| "Fam64a"   | 2.5992167   | 2.6468053   | 2.6387298   | 2.835995    | 2.64319     | 2.5990098   | 2.6395493   | 2.6855483   |
| "Fam65a"   | 5.9444447   | 6.2926044   | 6.094513    | 6.4725194   | 6.6705337   | 6.4813724   | 6.4326324   | 6.3669214   |
| "Fam65b"   | 3.6338882   | 3.1778655   | 4.4302297   | 5.1213846   | 3.5507662   | 6.3229237   | 3.8996453   | 4.212335    |
| "Fam69b"   | 2.287888    | 2.3245044   | 2.309748    | 2.6319728   | 2.3145769   | 2.2806792   | 2.3120663   | 2.758877    |
| "Fam73b"   | 6.4633378   | 5.8679193   | 6.0952298   | 5.820533    | 6.61413435  | 6.155232    | 6.84317675  | 5.995526    |
| "Fam76a"   | 5.2623303   | 5.505949    | 5.5199683   | 5.83195035  | 5.4885605   | 5.3531045   | 5.48878475  | 5.7079364   |
| "Fam76b"   | 7.096705    | 7.367704867 | 6.777170667 | 6.9177467   | 7.4182415   | 7.5693229   | 6.689641167 | 6.850318433 |
| "Fam82a2"  | 5.67614415  | 4.5465129   | 5.0481508   | 4.80184245  | 5.23283235  | 4.95915075  | 5.2435975   | 4.9704945   |
| "Fam82b"   | 4.941586067 | 4.8725547   | 5.486506433 | 6.104399767 | 5.573124567 | 5.005323833 | 5.522952267 | 6.1835176   |
| "Fam89b"   | 5.721396    | 5.6678452   | 6.195024    | 6.029964    | 5.840846    | 5.615282    | 6.1909866   | 6.026447    |

|           |             |             |             |             |             |             |             |             |
|-----------|-------------|-------------|-------------|-------------|-------------|-------------|-------------|-------------|
| "Fam92a"  | 7.723787    | 7.3777647   | 7.9889984   | 8.486647    | 7.6716695   | 6.8726      | 7.899664    | 8.044924    |
| "Fam96a"  | 9.826074    | 9.380571    | 10.157766   | 10.6347275  | 9.746799    | 9.49306875  | 10.436081   | 10.530055   |
| "Fam96b"  | 9.087186    | 8.636942    | 9.131775    | 9.0261      | 8.843184    | 8.566425    | 9.87847     | 9.876196    |
| "Fam98a"  | 8.954113    | 9.571574    | 9.525677    | 9.539844    | 9.370272    | 9.178068    | 9.298659    | 9.671506    |
| "Fam98c"  | 5.572625    | 5.874488    | 5.743244    | 6.3252816   | 5.761922    | 5.457523    | 5.42132     | 6.228307    |
| "Fanc"    | 3.03387465  | 3.0454147   | 3.1721495   | 2.878644    | 3.14595085  | 3.06353745  | 2.86333605  | 3.02830745  |
| "Fance"   | 3.6216984   | 3.6358545   | 3.5970612   | 3.6737547   | 3.6281903   | 3.6141882   | 3.6258585   | 3.6749125   |
| "Fancf"   | 3.0411463   | 3.2873806   | 3.34233315  | 3.56605275  | 3.33491215  | 3.2447537   | 3.4359808   | 3.620078    |
| "Fanci"   | 2.4047594   | 2.5040336   | 2.4576974   | 2.5668712   | 2.461063    | 2.4166958   | 2.4572167   | 2.5608025   |
| "Fanci"   | 4.9011664   | 5.9491625   | 5.9259564   | 6.0758753   | 5.898166    | 5.700288    | 4.963038    | 6.1453357   |
| "Fancm"   | 2.724774    | 2.8097637   | 2.7755485   | 2.8296394   | 2.7825654   | 2.755247    | 2.7825248   | 2.900366    |
| "Fank1"   | 2.8764826   | 3.0275494   | 2.96003525  | 3.12230245  | 2.96516585  | 2.8742727   | 2.9614155   | 3.0717469   |
| "Fap"     | 6.467065    | 5.244766    | 7.994066    | 7.3318157   | 7.2575927   | 6.2412357   | 7.4593425   | 7.434177    |
| "Far1"    | 4.51035236  | 4.77364566  | 5.3080611   | 5.32290998  | 4.94456374  | 5.2058784   | 5.2381337   | 5.43945678  |
| "Farp1"   | 4.00099     | 5.18076     | 4.529717    | 4.3002725   | 4.112325    | 4.337692    | 4.369062    | 3.879272    |
| "Farp2"   | 3.3170748   | 3.0819173   | 3.2298813   | 3.1350436   | 3.043104    | 2.9254217   | 2.9795988   | 3.108858    |
| "Fars2"   | 6.88144985  | 7.16867855  | 6.92196605  | 7.4122258   | 7.0334117   | 6.6233032   | 6.83164535  | 7.39800765  |
| "Farsa"   | 6.4297976   | 6.7095723   | 6.551474    | 6.604171    | 6.502504    | 6.596354    | 6.552535    | 6.4923253   |
| "Farsb"   | 7.422172825 | 7.64280365  | 7.627237575 | 7.78507625  | 7.411280875 | 7.62988675  | 7.7486065   | 7.844899075 |
| "Fas"     | 6.7144594   | 6.461242    | 6.3819475   | 6.2018886   | 7.116992    | 7.018881    | 6.3830175   | 6.466804    |
| "Fasl"    | 2.3185468   | 2.3776746   | 2.352653    | 2.4260798   | 2.3534026   | 2.3280978   | 2.3463001   | 2.4250708   |
| "Fasn"    | 6.38214     | 5.628492    | 8.242026    | 5.3067856   | 7.0721493   | 6.801363    | 12.1567335  | 6.9656215   |
| "Fastk"   | 7.6738553   | 8.020698    | 8.400036    | 8.757219    | 7.9788766   | 7.1934204   | 8.31582     | 8.294599    |
| "Fastkd1" | 7.1512685   | 6.5033026   | 6.6125493   | 7.3586955   | 7.404079    | 6.6002626   | 7.1815553   | 7.527713    |
| "Fastkd2" | 8.129889333 | 8.651626667 | 8.541812333 | 8.954563667 | 8.350919567 | 8.070034333 | 8.508402833 | 8.825061333 |
| "Fastkd5" | 7.3717775   | 7.8019247   | 6.997013    | 7.5519657   | 7.4018173   | 7.5567975   | 7.2915664   | 7.706842    |
| "Fau"     | 13.021904   | 13.106974   | 12.854914   | 12.479265   | 12.893549   | 13.140457   | 13.095355   | 12.438254   |
| "Fbi"     | 7.2559725   | 6.98979825  | 7.11048005  | 7.01307655  | 7.131909    | 7.4396243   | 7.118407    | 6.94283605  |
| "Fblim1"  | 2.62039175  | 2.6270037   | 2.55514165  | 2.64863885  | 2.631358    | 3.06736945  | 2.651786    | 2.62520525  |
| "Fbln1"   | 4.4159678   | 4.1384066   | 4.5242376   | 4.4242875   | 4.07377005  | 4.0410055   | 4.67777565  | 5.24975285  |
| "Fbln2"   | 8.298302    | 7.4055195   | 9.033104    | 8.622438    | 9.351753    | 8.638382    | 8.767284    | 8.791732    |
| "Fbln5"   | 7.7906756   | 7.5909247   | 8.276069    | 7.598327    | 8.441388    | 8.32618     | 7.528363    | 8.015392    |
| "Fbln7"   | 3.0593395   | 2.031684    | 3.9766364   | 3.708262    | 3.1371279   | 2.7253537   | 3.7390728   | 3.178818    |
| "Fbn1"    | 8.02302575  | 5.847568    | 10.148426   | 8.8607603   | 8.8454845   | 7.7004295   | 8.4494405   | 8.6441462   |
| "Fbn2"    | 2.305549    | 2.4148376   | 2.8803425   | 2.4961038   | 2.3563707   | 2.3145764   | 2.3448064   | 2.5073495   |
| "Fbp1"    | 11.79732    | 2.2846081   | 4.477126    | 2.133902    | 4.407653    | 2.0667586   | 2.0836084   | 2.345536    |
| "Fbp2"    | 10.570667   | 11.174437   | 11.555642   | 10.9651375  | 11.072191   | 10.742349   | 10.20649    | 10.861433   |
| "Fbrs"    | 3.8664692   | 4.4908452   | 3.8270763   | 4.00898635  | 3.94082085  | 4.43504925  | 3.7336837   | 3.9955493   |
| "Fbxi12"  | 5.3556595   | 5.475347    | 4.2607656   | 4.540283    | 5.2123375   | 6.0071726   | 4.8031273   | 5.1466713   |
| "Fbxi14"  | 5.334309    | 6.044372    | 6.436184    | 6.7016783   | 5.578236    | 5.5606904   | 6.1910295   | 6.4881296   |
| "Fbxi15"  | 2.5740502   | 2.414988    | 2.4408882   | 2.4977348   | 2.415476    | 2.4236367   | 2.3885934   | 2.4661095   |
| "Fbxi20"  | 6.820825    | 7.059751    | 6.4531307   | 6.438944    | 7.2285576   | 6.984258    | 6.4472885   | 6.7177167   |
| "Fbxi3"   | 8.80313885  | 9.51801225  | 7.849294    | 7.9322465   | 8.71280625  | 8.618372    | 7.3969755   | 8.27163175  |
| "Fbxi6"   | 3.575703    | 3.4220853   | 3.5460718   | 3.5511472   | 3.5136912   | 4.175506    | 3.5125856   | 3.3424337   |
| "Fbxo11"  | 8.325545    | 8.761462    | 8.825017    | 9.292675    | 9.02459     | 8.607713    | 8.713088    | 9.511539    |
| "Fbxo17"  | 4.437521    | 5.0264626   | 4.500174    | 4.9255896   | 3.8904216   | 3.1755204   | 4.435156    | 4.2020288   |
| "Fbxo18"  | 7.6008215   | 7.467472    | 7.406045    | 6.8277483   | 7.3284354   | 7.348761    | 7.6144605   | 7.019652    |
| "Fbxo21"  | 3.2438276   | 3.69000125  | 3.2829071   | 3.13391805  | 4.40554855  | 3.7074162   | 3.4922302   | 3.4917511   |
| "Fbxo22"  | 5.9223642   | 6.321479667 | 6.070911967 | 6.342638467 | 6.118812667 | 6.032203267 | 5.95329     | 6.317234033 |
| "Fbxo25"  | 6.437527    | 6.591027    | 6.931145    | 7.3786826   | 6.675369    | 6.50851     | 7.4943166   | 7.160339    |
| "Fbxo28"  | 6.0790806   | 6.720337    | 6.562516    | 6.5539637   | 6.5753155   | 6.8710513   | 6.637781    | 6.665078    |
| "Fbxo3"   | 6.710762625 | 6.807885125 | 7.14029475  | 7.60144065  | 7.22292045  | 6.65276565  | 7.06588805  | 7.368277    |
| "Fbxo31"  | 8.056827    | 7.666117    | 6.1164036   | 6.2686176   | 7.751483    | 8.116253    | 7.175824    | 6.6222      |
| "Fbxo32"  | 13.34090925 | 14.0390905  | 10.44969725 | 11.061779   | 13.6273725  | 13.921159   | 11.165881   | 11.645567   |
| "Fbxo33"  | 7.37863815  | 6.55473565  | 6.480679    | 6.30616045  | 6.6683987   | 7.2744048   | 6.8477673   | 6.4432615   |
| "Fbxo36"  | 4.038599    | 4.0499215   | 4.0447526   | 4.1626344   | 4.044371    | 3.9670699   | 4.4098253   | 4.0889387   |
| "Fbxo38"  | 7.573178    | 7.97595     | 7.308252    | 7.2809887   | 7.507707    | 7.96916     | 7.2590604   | 7.064168    |
| "Fbxo4"   | 5.752698    | 6.0337396   | 5.417223    | 4.7580976   | 5.799685    | 6.95661     | 5.7236633   | 4.4181137   |
| "Fbxo42"  | 2.4395041   | 2.625479    | 2.585694    | 2.6836092   | 2.8158784   | 2.858017    | 2.582269    | 2.4869561   |
| "Fbxo45"  | 5.0353086   | 5.1955576   | 5.8374717   | 6.01020625  | 5.4403483   | 5.126894    | 6.0851068   | 5.9486965   |
| "Fbxo6"   | 7.7869177   | 7.990612    | 7.459281    | 7.881539    | 8.054999    | 7.577913    | 8.293135    | 7.621572    |
| "Fbxo8"   | 7.8221493   | 7.929816    | 7.9277544   | 7.8478565   | 7.878499    | 7.928625    | 7.998272    | 7.969673    |
| "Fbxo9"   | 8.99086925  | 9.5220835   | 8.8227405   | 8.796602    | 8.9805847   | 8.97450275  | 8.1957915   | 8.6124415   |
| "Fbxw11"  | 10.4354245  | 11.17034075 | 10.01461    | 10.2805435  | 10.4324065  | 10.950519   | 10.129958   | 10.14645275 |
| "Fbxw2"   | 5.77085126  | 6.39547286  | 5.73333134  | 6.0265512   | 6.0041885   | 6.2463706   | 5.9076112   | 6.01108918  |
| "Fbxw4"   | 7.193692    | 7.441767    | 7.2570434   | 7.421832    | 7.100849    | 7.0068884   | 7.7712326   | 7.1502976   |
| "Fbxw5"   | 6.2365465   | 7.0403094   | 6.625955    | 6.4820013   | 6.104796    | 6.028121    | 6.313988    | 6.4011455   |
| "Fbxw7"   | 8.127179    | 7.179848    | 7.9784555   | 7.60839375  | 7.13988475  | 6.65579105  | 7.69718135  | 7.7504339   |
| "Fbxw8"   | 6.0407267   | 6.4336762   | 5.7751966   | 5.8443336   | 6.095388    | 6.251546    | 6.0974426   | 5.758013    |
| "Fbxw9"   | 3.06094275  | 3.1101685   | 3.1267165   | 3.1346944   | 3.11684405  | 3.01021645  | 3.1120081   | 3.1630373   |
| "Fcer1a"  | 2.1966143   | 2.2436972   | 2.2272685   | 2.303625    | 2.2308455   | 2.6531518   | 2.202775    | 2.316454    |
| "Fcer1g"  | 8.456999    | 4.904745    | 7.523401    | 5.8391414   | 7.287504    | 7.773027    | 8.299135    | 6.6259713   |
| "Fcer2a"  | 2.27418005  | 2.38494665  | 2.3194585   | 2.4043504   | 2.3311789   | 2.63552925  | 2.31609665  | 2.3914175   |
| "Fcgbp"   | 2.5135434   | 2.5733337   | 3.1709082   | 2.7477787   | 2.5720403   | 2.5044801   | 2.5627077   | 2.6145766   |
| "Fcgr1"   | 3.9265332   | 2.5248334   | 2.6215982   | 2.6018867   | 2.3472145   | 2.5363574   | 4.3999166   | 2.599701    |
| "Fcgr2b"  | 7.7261356   | 4.635485325 | 6.7354276   | 5.097207675 | 6.7407172   | 7.5289394   | 7.4018355   | 5.639100725 |
| "Fcgr3"   | 9.103412    | 5.5219097   | 7.8155127   | 6.677729    | 7.894567    | 8.511734    | 8.529783    | 7.109994    |
| "Fcgr4"   | 5.67173     | 1.9270066   | 1.9124311   | 1.9684986   | 1.900078    | 2.2991858   | 2.3988433   | 1.9692144   |
| "Fcgrt"   | 7.999197    | 6.926397    | 8.314109    | 7.332771    | 8.511118    | 8.443782    | 8.42289     | 7.6617723   |
| "Fcho1"   | 2.6529285   | 2.7738005   | 2.7027167   | 2.82168735  | 2.70986565  | 2.6637654   | 2.6994133   | 2.807548    |
| "Fcna"    | 8.602848    | 4.5565014   | 6.131226    | 4.383387    | 7.8425965   | 8.128116    | 6.9481106   | 5.1978736   |

|            |             |             |             |             |             |             |             |             |
|------------|-------------|-------------|-------------|-------------|-------------|-------------|-------------|-------------|
| "Fcrl1"    | 2.2177303   | 2.28295825  | 2.25289885  | 2.33308365  | 2.25307465  | 3.723156    | 2.24355915  | 2.3245626   |
| "Fcrla"    | 2.427269433 | 2.523865467 | 2.4803317   | 2.582454567 | 2.470967267 | 2.711135233 | 2.474863767 | 2.5541746   |
| "Fcrls"    | 4.124517    | 3.0210056   | 6.6094203   | 4.8375883   | 4.951581    | 3.9785275   | 6.405665    | 5.449085    |
| "Fdft1"    | 10.590768   | 11.2352475  | 9.808853    | 10.002427   | 10.937379   | 10.69168525 | 10.227124   | 9.902326    |
| "Fdps"     | 8.602795    | 6.155146    | 6.482306    | 6.4490886   | 5.798851    | 5.075783    | 6.6261935   | 6.4396796   |
| "Fdx1"     | 9.924172    | 9.778282    | 9.764714    | 10.05092    | 10.058416   | 9.891454    | 9.969489    | 9.963023    |
| "Fdx1l"    | 8.547553    | 8.468103    | 8.446975    | 8.602921    | 7.9635415   | 7.6786985   | 8.901063    | 8.487934    |
| "Fdxr"     | 2.2573307   | 2.2920232   | 2.2664933   | 2.3114765   | 2.2640727   | 2.178635    | 2.7609875   | 2.3112235   |
| "Fech"     | 9.560835167 | 9.748236667 | 9.887495667 | 10.36605967 | 9.647303667 | 9.417444667 | 9.779285333 | 10.37283367 |
| "Fem1a"    | 9.280554    | 9.959983    | 9.481023    | 9.81431     | 9.586476    | 9.174571    | 9.599297    | 9.433707    |
| "Fem1b"    | 6.2853298   | 6.22873015  | 6.093266    | 5.87006055  | 6.2468634   | 5.85360435  | 5.85703135  | 5.8659823   |
| "Fen1"     | 5.59437375  | 6.16626785  | 5.64889125  | 5.6933962   | 5.81461115  | 5.5729893   | 5.7015509   | 5.4093922   |
| "Ferd3l"   | 2.36727     | 2.4553223   | 2.403469    | 2.5167184   | 2.4095864   | 2.3664243   | 2.4045348   | 2.4684796   |
| "Fermt2"   | 9.785453    | 10.4756235  | 10.254865   | 10.331947   | 10.2721785  | 10.356386   | 10.030501   | 10.390626   |
| "Fermt3"   | 5.66166725  | 3.78736995  | 4.90396885  | 4.07633175  | 5.12682855  | 7.139842    | 5.20288575  | 4.3618035   |
| "Fert2"    | 2.8896723   | 3.37595125  | 3.2512343   | 3.17017995  | 3.2602724   | 3.1058077   | 3.23234375  | 3.3435246   |
| "Fes"      | 3.9975403   | 3.59303245  | 4.0140228   | 3.8342265   | 3.9896449   | 4.30306305  | 3.8702827   | 3.83588625  |
| "Fetub"    | 9.277067    | 2.3435118   | 2.8091776   | 2.378963    | 2.3309      | 2.2591023   | 2.2586272   | 2.3738134   |
| "Fez1"     | 5.2809424   | 3.8500452   | 4.1242366   | 3.868545    | 4.6741915   | 4.1068816   | 5.6124926   | 4.0114417   |
| "Fez2"     | 8.216215    | 8.545152    | 9.147356    | 9.412213    | 8.481772    | 8.642969    | 8.648249    | 9.328132    |
| "Fezf2"    | 2.5568857   | 2.6602798   | 2.6246228   | 2.7545924   | 2.6260347   | 2.5671668   | 2.6143825   | 2.7087574   |
| "Ffar2"    | 2.1232043   | 2.19896915  | 2.2664604   | 2.19802095  | 2.18652775  | 2.44908965  | 2.650956    | 2.231754    |
| "Fga"      | 12.467357   | 2.7309654   | 5.1379404   | 2.8642437   | 4.23095     | 2.6501503   | 2.6867583   | 4.409161    |
| "Fgb"      | 13.99886    | 3.0056462   | 6.142824    | 2.9207792   | 4.550703    | 2.601563    | 2.5706515   | 3.493342    |
| "Fgd1"     | 2.71659325  | 3.09709235  | 3.15320935  | 3.1512135   | 3.04291005  | 2.79966715  | 3.0287409   | 3.0796616   |
| "Fgd2"     | 2.196773    | 2.2326503   | 2.2346625   | 2.3215597   | 2.2384906   | 2.2366712   | 2.2266712   | 2.306924    |
| "Fgd4"     | 2.81244855  | 3.140277875 | 3.087086275 | 3.05890315  | 2.9053447   | 2.884780475 | 2.911462675 | 2.991553    |
| "Fgd6"     | 4.3704805   | 2.4094784   | 2.4276      | 2.4647613   | 2.473861    | 2.6233132   | 2.4617705   | 2.4545856   |
| "Fgf1"     | 6.8063005   | 5.9693593   | 5.91027415  | 6.0101394   | 6.62809975  | 5.8182631   | 5.9675095   | 6.2602447   |
| "Fgf11"    | 2.8414834   | 3.0011303   | 2.8913376   | 2.9699047   | 2.9026203   | 2.84552     | 3.987265    | 2.9709601   |
| "Fgf13"    | 8.020927    | 8.0241785   | 8.83971     | 8.8118      | 8.446307    | 7.890792    | 8.665568    | 8.769397    |
| "Fgf14"    | 2.8034878   | 3.0063689   | 2.8921402   | 3.0937474   | 2.9073608   | 2.8060257   | 2.8863692   | 3.0330775   |
| "Fgf16"    | 2.4306498   | 2.52823     | 2.4506595   | 2.5926728   | 2.4591258   | 2.4264176   | 2.45494     | 2.5861323   |
| "Fgf17"    | 2.4121401   | 2.532917    | 2.4462442   | 2.5523567   | 2.4496431   | 2.4132857   | 2.4451106   | 2.5409055   |
| "Fgf18"    | 2.2490351   | 2.3285186   | 2.725106    | 2.4184825   | 2.2988422   | 2.2554772   | 2.2936797   | 2.4075632   |
| "Fgf2"     | 2.5910635   | 2.7293987   | 2.6517062   | 2.7709455   | 2.6626348   | 2.6113493   | 2.6487756   | 2.7507896   |
| "Fgf20"    | 2.5248065   | 2.5938742   | 2.5262249   | 2.6855826   | 2.5313275   | 2.4900231   | 2.5241683   | 2.6453788   |
| "Fgf22"    | 2.6757772   | 2.7941694   | 2.7040424   | 2.764525    | 2.7033873   | 2.67032     | 2.7048464   | 2.8390136   |
| "Fgf3"     | 2.5791588   | 2.6784642   | 2.6594439   | 2.74859865  | 2.6587275   | 2.5813173   | 2.6557252   | 2.73309135  |
| "Fgf6"     | 2.8035688   | 2.901063    | 4.2341337   | 4.723296    | 2.8411884   | 2.799577    | 3.1264079   | 4.0640316   |
| "Fgf7"     | 3.2966034   | 3.4586322   | 4.491783    | 3.8473582   | 3.5078256   | 3.3311      | 3.6068435   | 3.714745    |
| "Fgf9"     | 2.8515773   | 3.0162256   | 2.898305    | 3.02746     | 2.8972893   | 2.8739552   | 2.8914278   | 2.9890625   |
| "Fgfbp1"   | 4.007834    | 3.647135    | 7.451136    | 7.085519    | 4.714644    | 2.9598715   | 3.9384544   | 6.7910633   |
| "Fgfr1"    | 6.57285735  | 7.776897    | 6.1801985   | 5.92017785  | 7.42903335  | 7.2630885   | 6.0326712   | 6.2324442   |
| "Fgfr1op2" | 7.312244067 | 7.707518    | 7.8903238   | 8.0453828   | 7.732788333 | 7.6627745   | 8.1399255   | 8.0770564   |
| "Fgfr2"    | 4.085858    | 2.219278    | 2.2793715   | 2.2281108   | 2.2352524   | 2.3541229   | 2.2028344   | 2.2632203   |
| "Fgfr3"    | 5.3405313   | 4.4910717   | 4.272681    | 4.3119535   | 4.271854    | 4.6062307   | 4.0123687   | 4.388507    |
| "Fgfr4"    | 3.022468567 | 2.426638533 | 2.570491033 | 2.595617433 | 2.512499633 | 2.418255067 | 2.563773933 | 2.5695429   |
| "Fgfrl1"   | 6.374592    | 5.6170635   | 6.211912    | 6.0313406   | 7.710503    | 6.0771294   | 7.0454893   | 6.609213    |
| "Fgg"      | 14.087277   | 3.5314841   | 7.024716    | 3.0588028   | 5.179291    | 2.9366515   | 2.547128    | 4.8590007   |
| "Fggy"     | 5.9194345   | 4.262027    | 4.279598    | 4.574874    | 4.1400576   | 3.7827923   | 4.7516847   | 4.297455    |
| "Fgl1"     | 12.121719   | 3.0132613   | 4.442255    | 3.0698593   | 3.4718516   | 2.95432     | 2.845086    | 3.6415777   |
| "Fgl2"     | 6.34976265  | 5.8090537   | 5.9233177   | 5.788581    | 6.55811     | 6.0255873   | 5.86564185  | 6.08502555  |
| "Fh1"      | 12.1746025  | 11.718566   | 12.042415   | 12.329931   | 12.242596   | 11.983174   | 12.002897   | 12.355294   |
| "Fhdc1"    | 2.3837552   | 2.4748442   | 2.8159022   | 2.5366068   | 2.4311588   | 2.3993292   | 2.4260256   | 2.528164    |
| "Fhit"     | 2.6685872   | 2.230042    | 2.607932    | 2.30614     | 2.564747    | 2.3591418   | 2.3829374   | 2.2684374   |
| "Fhl1"     | 14.046961   | 13.043214   | 13.738079   | 13.887054   | 14.51261    | 13.720319   | 14.107877   | 14.050131   |
| "Fhl2"     | 5.0328116   | 4.774657    | 4.7135234   | 5.076608    | 5.2752357   | 4.090608    | 5.9431605   | 5.6603265   |
| "Fhl3"     | 2.6138706   | 3.1670034   | 2.7504058   | 2.7829018   | 3.151128    | 2.7427897   | 2.7439232   | 2.7613993   |
| "Fhl4"     | 2.423992    | 2.5106398   | 2.46562575  | 2.6046361   | 2.4689865   | 2.429047    | 2.46316695  | 2.55897945  |
| "Fhod3"    | 8.041659    | 7.668566    | 8.402087    | 8.718958    | 7.468814    | 7.583495    | 8.149079    | 8.491478    |
| "Fibin"    | 8.753054    | 10.125603   | 5.3635864   | 5.4355617   | 7.2283177   | 9.459092    | 4.1623487   | 6.237537    |
| "Fibp"     | 5.5827746   | 6.0005302   | 6.8313375   | 6.956101    | 5.865414    | 5.423467    | 6.6549287   | 6.332834    |
| "Ficd"     | 5.0094724   | 5.7103963   | 5.2921033   | 5.5509043   | 5.4259      | 5.168606    | 5.1807213   | 5.3689666   |
| "Fig4"     | 5.383526    | 5.705848    | 6.086113    | 5.9586167   | 5.7487454   | 5.6879663   | 5.790486    | 5.8908234   |
| "Figf"     | 7.864004167 | 9.052399667 | 5.208829667 | 5.273129667 | 7.8428361   | 8.433798667 | 6.7171465   | 6.176938367 |
| "Fign"     | 2.402715    | 2.5924976   | 3.2600412   | 2.71543     | 2.5490973   | 2.5480156   | 2.8589087   | 2.64882     |
| "Fignl1"   | 2.3094788   | 2.412476    | 2.5244217   | 2.4347825   | 2.3560905   | 2.3685355   | 2.344533    | 2.433632    |
| "Fip111"   | 7.7652622   | 8.1448073   | 7.35393065  | 7.4855225   | 7.8274177   | 8.3055625   | 7.2424473   | 7.59942385  |
| "Fis1"     | 9.545695    | 10.008945   | 10.005675   | 9.881551    | 9.787625    | 9.416483    | 9.841028    | 9.839964    |
| "Fitm1"    | 10.398626   | 10.61204    | 11.293944   | 11.14411    | 10.632311   | 10.017652   | 10.697926   | 10.875394   |
| "Fiz1"     | 6.810454    | 7.9194074   | 6.4414325   | 6.6507306   | 7.0914245   | 7.69187     | 6.82688     | 6.737945    |
| "Fjx1"     | 2.9639373   | 3.0377202   | 3.0074224   | 3.0980632   | 2.992238    | 2.9995208   | 2.9568782   | 3.0599213   |
| "Fkbp10"   | 2.545657    | 2.0890293   | 3.7935045   | 2.9232085   | 2.8065734   | 2.7455308   | 2.786087    | 2.93221     |
| "Fkbp11"   | 2.64937425  | 2.6893994   | 2.66484045  | 2.7654795   | 2.7166228   | 2.59829735  | 3.0180117   | 2.71633725  |
| "Fkbp15"   | 6.09334     | 6.3034554   | 4.733699    | 4.7028317   | 5.7758193   | 6.517987    | 5.2303853   | 4.944031    |
| "Fkbp1a"   | 8.58773984  | 8.77578048  | 9.09036     | 9.12024604  | 8.8274321   | 8.71745038  | 9.0172176   | 9.09241428  |
| "Fkbp2"    | 7.3900514   | 4.6787515   | 7.327089    | 6.6669474   | 6.5618935   | 6.2416754   | 7.526703    | 6.6050234   |
| "Fkbp3"    | 11.1196425  | 11.207259   | 11.6157095  | 12.127673   | 11.397074   | 10.9146195  | 11.537846   | 12.03122775 |
| "Fkbp4"    | 5.638161    | 5.626397    | 6.03283765  | 6.1672976   | 5.8249938   | 5.33139135  | 6.06410025  | 5.9689784   |
| "Fkbp5"    | 9.0197255   | 9.77375915  | 6.06935935  | 6.10875605  | 8.7112764   | 9.7364675   | 6.11043075  | 6.03256065  |

|           |             |             |             |             |             |             |             |             |
|-----------|-------------|-------------|-------------|-------------|-------------|-------------|-------------|-------------|
| "Fkbp6"   | 2.4265351   | 2.605626    | 2.5793154   | 2.6227694   | 2.5857427   | 2.5520525   | 2.5791323   | 2.611842    |
| "Fkbp7"   | 6.867001    | 6.4742327   | 8.499561    | 7.749269    | 7.5631075   | 7.073959    | 7.732974    | 7.5551186   |
| "Fkbp8"   | 6.0854583   | 6.1544375   | 5.862655    | 6.2017426   | 5.8924384   | 5.800078    | 5.9798393   | 5.9820476   |
| "Fkbp9"   | 9.2263025   | 9.1746955   | 10.6753205  | 9.8428705   | 9.795784    | 9.48322     | 10.241164   | 10.102484   |
| "Fkbp1"   | 4.677434    | 5.5737286   | 3.817       | 4.2323003   | 4.936327    | 5.370222    | 4.729885    | 4.3595824   |
| "Fktn"    | 2.84519625  | 3.04791995  | 3.83975825  | 3.81792765  | 2.95519125  | 2.9675507   | 3.14623415  | 4.01123865  |
| "Flad1"   | 4.57960745  | 4.554188125 | 5.09120635  | 5.1679597   | 4.731236875 | 4.56656805  | 4.956483375 | 5.05158165  |
| "Flcn"    | 6.9033652   | 7.3071451   | 6.3931049   | 6.500267067 | 6.886574133 | 7.121116133 | 6.2445545   | 6.658406467 |
| "Flg"     | 2.6342762   | 2.8284452   | 3.9134037   | 2.8509552   | 2.7052886   | 2.6517673   | 2.690007    | 2.816919    |
| "Fli1"    | 4.571741    | 5.53365935  | 5.44615245  | 6.0277685   | 6.0188582   | 6.72972275  | 5.79400485  | 6.24349     |
| "Flii"    | 7.083491933 | 7.1624716   | 7.14888933  | 7.1222292   | 7.277066833 | 7.050690067 | 7.292819833 | 7.1489965   |
| "Flna"    | 6.896429    | 6.781366    | 7.302642    | 6.954245    | 7.115037    | 7.1585073   | 7.244315    | 7.08812     |
| "Flnb"    | 5.9031024   | 5.0372796   | 5.9025407   | 5.8929496   | 5.6747465   | 5.9308934   | 5.9377317   | 6.061027    |
| "Flnc"    | 10.215483   | 10.339645   | 9.926676    | 9.697665    | 10.137254   | 10.669077   | 9.970241    | 9.660325    |
| "Flot1"   | 9.056784    | 8.9630165   | 9.141484    | 9.162537    | 9.062493    | 8.453887    | 9.423473    | 9.1959305   |
| "Flot2"   | 6.861397    | 6.98165365  | 7.3525903   | 7.1976987   | 7.447586    | 6.91151425  | 7.22453515  | 7.1459467   |
| "Flt1"    | 5.862320733 | 6.153426167 | 5.1882644   | 5.5690408   | 5.758924933 | 5.997165167 | 5.535084467 | 5.781314633 |
| "Flt31"   | 2.4321988   | 2.5124726   | 2.5460498   | 2.5295272   | 2.497275    | 2.7020571   | 2.450943    | 2.5292048   |
| "Flt4"    | 4.179389    | 3.1185138   | 2.9803903   | 3.1671135   | 3.2177439   | 3.5369325   | 2.9854143   | 2.6649854   |
| "Flywch1" | 5.48871995  | 6.47600365  | 5.463245    | 5.593342    | 5.5284522   | 6.279814    | 5.416565    | 5.47451925  |
| "Fmn1"    | 2.3921857   | 2.4598444   | 2.4288926   | 2.5398176   | 2.4170487   | 2.3832119   | 2.4273171   | 2.5265293   |
| "Fmn2"    | 2.7241534   | 2.4543879   | 2.3831948   | 2.4727298   | 2.39605525  | 2.33739005  | 2.4686996   | 2.48282225  |
| "Fmnl3"   | 3.4198182   | 3.460604    | 3.4590192   | 3.51163     | 3.4564974   | 3.5478535   | 3.4520097   | 3.616095    |
| "Fmo1"    | 9.03388     | 7.468747    | 7.640038    | 7.767747    | 8.726388    | 8.768518    | 9.006265    | 8.235839    |
| "Fmo2"    | 7.3114953   | 7.7712718   | 5.18206535  | 6.2182834   | 7.602518    | 8.0795865   | 6.6400105   | 6.47252135  |
| "Fmo3"    | 3.9527917   | 2.396356    | 2.3737526   | 2.4349937   | 2.341815    | 2.2980316   | 2.3338072   | 2.4249008   |
| "Fmo5"    | 5.8372049   | 2.68977725  | 3.06818675  | 2.73905255  | 3.0109902   | 3.9486965   | 2.962268    | 2.72345305  |
| "Fmod"    | 9.543197667 | 8.872827283 | 11.60598217 | 10.6861205  | 8.295009783 | 8.955992333 | 8.281389    | 11.08913    |
| "Fmr1"    | 4.426418    | 4.6274942   | 4.721463467 | 4.458852167 | 4.580404667 | 4.666831267 | 4.5514523   | 4.6120879   |
| "Fn1"     | 7.2974749   | 5.0639083   | 7.8774615   | 6.43823     | 6.55476885  | 6.35916665  | 6.0755484   | 6.949537    |
| "Fn3k"    | 6.7718697   | 6.9721737   | 7.469301    | 8.000842    | 6.899819    | 5.935717    | 7.788894    | 7.555423    |
| "Fnbp1"   | 2.97482815  | 2.7353654   | 3.2228305   | 3.00947665  | 3.3911966   | 3.66993915  | 3.2190665   | 3.5112666   |
| "Fnbp4"   | 5.09065835  | 5.48231975  | 4.7707397   | 4.81484685  | 5.4262769   | 5.5957272   | 5.01534215  | 4.95916055  |
| "Fndc1"   | 6.487474    | 4.709859    | 9.592311    | 8.186064    | 7.7830653   | 6.656336    | 7.9341044   | 8.377395    |
| "Fndc3a"  | 7.6631665   | 6.8887253   | 7.1830673   | 7.020647    | 7.553832    | 7.9962053   | 7.540407    | 7.5172343   |
| "Fndc4"   | 2.4554186   | 2.527349    | 2.6873349   | 2.545177    | 2.46854875  | 2.4258597   | 2.49243805  | 2.5752356   |
| "Fnta"    | 9.856798    | 10.153843   | 10.475491   | 10.156585   | 10.204843   | 9.903692    | 10.509009   | 10.313846   |
| "Fntb"    | 3.7712152   | 3.9926476   | 3.6179082   | 3.6027703   | 3.645419    | 3.7832472   | 3.3787155   | 3.6744995   |
| "Folh1"   | 2.5185964   | 2.6773653   | 2.5755556   | 2.703329    | 2.6179106   | 2.5401983   | 2.573799    | 2.6871629   |
| "Folr1"   | 2.380795    | 2.4569156   | 2.442748    | 2.5118032   | 2.440846    | 2.44132     | 2.4105897   | 2.4905944   |
| "Folr2"   | 5.2308807   | 3.0346243   | 6.248971    | 3.2908309   | 6.1273403   | 5.12333     | 5.8245935   | 4.782059    |
| "Folr4"   | 2.253731    | 2.3036387   | 2.2761755   | 2.328422    | 2.276759    | 2.3688722   | 2.2748394   | 2.352731    |
| "Fos"     | 9.270505    | 8.163027    | 7.971856    | 8.578978    | 7.0645347   | 8.255608    | 8.153395    | 7.3161545   |
| "Fosl2"   | 2.7763855   | 3.4305239   | 2.9281893   | 3.0679824   | 2.6892722   | 2.5418596   | 2.657854    | 2.763491    |
| "Foxa1"   | 2.3912652   | 2.3989356   | 2.3622627   | 2.4609928   | 2.3647897   | 2.3293593   | 2.357528    | 2.4511788   |
| "Foxa3"   | 5.7058077   | 2.3186707   | 2.2865205   | 2.3808756   | 2.2871819   | 2.2530968   | 2.285623    | 2.3596313   |
| "Foxc1"   | 3.56078705  | 4.09917355  | 3.1496264   | 3.466457    | 3.1165719   | 3.5030097   | 3.11860025  | 3.181414    |
| "Foxc2"   | 2.6498373   | 2.6798806   | 2.5998302   | 2.7579033   | 2.6576371   | 2.6352687   | 2.6549602   | 2.7278647   |
| "Foxd1"   | 2.4617674   | 2.522809    | 2.4932592   | 2.5830188   | 2.56297     | 2.4655404   | 2.5057697   | 2.568464    |
| "Foxf1"   | 2.5120664   | 2.8536935   | 2.5644171   | 2.6353986   | 2.6348991   | 2.5450559   | 2.5620844   | 2.6223185   |
| "Foxf2"   | 3.0026517   | 3.152941    | 3.0662265   | 3.2470162   | 3.0814981   | 3.014977    | 3.0625935   | 3.1598363   |
| "Foxg1"   | 2.7752972   | 2.9696338   | 2.8660815   | 3.053067    | 2.8833969   | 2.7918704   | 2.865162    | 3.0001898   |
| "Foxh1"   | 3.4643015   | 3.67263555  | 3.57908295  | 3.695893    | 3.6044893   | 3.5383411   | 3.56136835  | 3.7165804   |
| "Foxj1"   | 3.0415895   | 3.2615805   | 3.2401426   | 3.365249    | 3.238253    | 3.1095762   | 3.2159276   | 3.3103569   |
| "Foxj2"   | 4.63224045  | 5.37208     | 5.17503405  | 5.2044759   | 5.27696665  | 5.13841025  | 5.05419335  | 5.2817173   |
| "Foxj3"   | 6.0832557   | 6.55979315  | 6.00513145  | 6.0788952   | 6.284401    | 6.29028515  | 5.964187    | 6.0324258   |
| "Foxk1"   | 2.2135673   | 2.6540618   | 2.1925716   | 2.2601619   | 2.323585    | 2.186842    | 2.1911793   | 2.2614155   |
| "Foxk2"   | 6.500530433 | 6.693240933 | 7.130531    | 7.332425767 | 6.479915467 | 6.365964    | 7.365319933 | 6.757394233 |
| "Foxm1"   | 2.3198254   | 2.45709025  | 2.35858595  | 2.49401805  | 2.366577    | 2.329851    | 2.36194935  | 2.4153042   |
| "Foxn2"   | 8.240786    | 9.283425    | 8.316242    | 8.552198    | 8.82065     | 8.7694025   | 8.031731    | 8.66358     |
| "Foxo1"   | 9.651729333 | 10.505519   | 6.457321933 | 5.650276233 | 9.100627667 | 9.742376667 | 7.564133667 | 6.4716946   |
| "Foxo3"   | 9.559304    | 9.992572    | 7.89260435  | 6.9826403   | 9.26394     | 9.45809     | 7.8982005   | 7.78866625  |
| "Foxo4"   | 2.208709    | 2.2259789   | 2.3925552   | 2.2937176   | 2.2205977   | 2.2006261   | 2.7243452   | 2.2836251   |
| "Foxp1"   | 6.214876371 | 6.845653886 | 5.034762757 | 4.362560086 | 5.689324043 | 7.2693878   | 4.693303414 | 4.970413857 |
| "Foxp2"   | 2.3331866   | 2.9131098   | 2.3598      | 2.43507     | 2.359595    | 2.3077314   | 2.3586426   | 2.4410987   |
| "Foxp3"   | 2.4000492   | 2.41919     | 2.4089582   | 2.4629054   | 2.4165778   | 2.391899    | 2.4090075   | 2.4589958   |
| "Foxred1" | 6.3349543   | 6.3267946   | 6.6254177   | 6.795047    | 7.271733    | 6.2257566   | 6.922858    | 6.7328186   |
| "Fpgs"    | 2.9769814   | 2.5654058   | 2.58336     | 2.6017156   | 2.5272126   | 2.5059257   | 2.566032    | 2.582581    |
| "Fpr1"    | 2.397367    | 2.4453545   | 2.4065657   | 2.4855103   | 2.4143653   | 2.3871458   | 2.408657    | 2.4810324   |
| "Fpr2"    | 4.845061    | 2.2387056   | 2.2212586   | 2.273872    | 2.2119188   | 3.0360167   | 2.235343    | 2.2710843   |
| "Frat1"   | 2.982888    | 3.050504    | 3.00701     | 3.047521    | 3.390989    | 2.997068    | 3.0270317   | 2.80967     |
| "Frat2"   | 6.733379    | 6.993578    | 7.4986167   | 7.4546533   | 6.773663    | 6.403216    | 6.8215637   | 6.994958    |
| "Frg1"    | 6.927523    | 7.5839343   | 6.823304    | 7.0065417   | 7.110525    | 7.335769    | 7.1187363   | 6.8929896   |
| "Frk"     | 2.662388567 | 2.871344633 | 2.8541742   | 2.9259218   | 2.799198533 | 2.698317133 | 2.8197572   | 2.9251629   |
| "Frm4b"   | 7.513318767 | 6.076990567 | 6.673283667 | 6.355246567 | 7.0568421   | 7.1261893   | 7.008020867 | 6.677251667 |
| "Frm6"    | 7.2023535   | 7.2996125   | 8.199398    | 7.767158    | 7.6994843   | 7.2762117   | 7.832136    | 7.494922    |
| "Frm62"   | 3.7832208   | 3.419463    | 2.865606    | 3.3648877   | 4.536455    | 5.1334743   | 3.790153    | 3.8331962   |
| "Frrs1"   | 5.8433924   | 4.1515527   | 3.2774606   | 3.9587216   | 5.1318765   | 5.3835692   | 4.1141105   | 3.380709    |
| "Frs3"    | 2.9128847   | 3.8746376   | 3.7058382   | 3.9414089   | 3.7101529   | 3.5762632   | 3.7049656   | 3.78171     |
| "Fryl"    | 7.22360805  | 7.74315275  | 7.3194398   | 6.86150425  | 7.37102415  | 7.9111883   | 7.57581565  | 7.3367493   |
| "Frzb"    | 3.502507    | 3.3399752   | 4.33858145  | 4.9940967   | 4.7364919   | 3.7447549   | 4.5342682   | 4.87436155  |

|              |             |             |             |             |             |             |             |             |
|--------------|-------------|-------------|-------------|-------------|-------------|-------------|-------------|-------------|
| "Fscn1"      | 5.747396    | 5.43636265  | 6.5382304   | 6.2208615   | 5.8689897   | 6.09281275  | 6.132128    | 6.304187    |
| "Fscn3"      | 2.6679447   | 2.7640204   | 2.7088685   | 2.796103    | 2.7143157   | 2.6679604   | 2.7132604   | 2.7512324   |
| "Fshb"       | 2.3792775   | 2.473446    | 2.421822    | 2.5678554   | 2.4241161   | 2.3870957   | 2.416871    | 2.4996037   |
| "Fslp1"      | 2.61571085  | 2.75365335  | 2.67921115  | 2.7799418   | 2.6838415   | 2.62344525  | 2.67118765  | 2.76703185  |
| "Fst"        | 7.053865    | 5.834814    | 6.7774234   | 5.6831803   | 5.6164045   | 5.7106066   | 5.7985897   | 5.6839867   |
| "Fstl1"      | 8.981183    | 7.007338    | 10.934466   | 9.586146    | 9.523434    | 8.44888025  | 9.578423    | 9.6280795   |
| "Fstl3"      | 3.5260563   | 3.7743838   | 3.5774276   | 3.569934    | 3.3471394   | 3.497798    | 3.5198781   | 3.5718496   |
| "Ftcd"       | 7.593355    | 2.134783    | 2.7047157   | 2.1743839   | 2.07138     | 2.024937    | 2.1532      | 2.2070625   |
| "Fth1"       | 14.4306455  | 14.4122745  | 14.2085095  | 14.293879   | 14.1949405  | 14.240282   | 14.4154295  | 14.2294295  |
| "Fthl17"     | 2.4504933   | 2.5693605   | 2.5015514   | 2.604714    | 2.5040963   | 2.4533894   | 2.5013366   | 2.5804572   |
| "Ftl1"       | 10.63092477 | 10.01258117 | 9.726108333 | 9.610997333 | 9.9927151   | 10.80347233 | 10.38376653 | 9.493497    |
| "Fto"        | 6.571713    | 7.00242975  | 6.7446934   | 6.8566071   | 6.62232435  | 6.5540785   | 6.67514835  | 6.75114415  |
| "Ftsj1"      | 7.8066278   | 8.1789055   | 8.022001    | 8.229553    | 8.061573    | 7.995553    | 8.048138    | 8.166873    |
| "Ftsj2"      | 3.1679246   | 2.7724788   | 4.0532103   | 4.342654    | 3.6762722   | 2.927771    | 3.9426024   | 4.433839    |
| "Ftsj3"      | 7.066771    | 7.5222316   | 6.6239567   | 6.5285034   | 7.0126166   | 7.14997     | 6.6508145   | 6.9054494   |
| "Ftsjd1"     | 2.9152495   | 3.25772575  | 2.9644519   | 3.03902635  | 2.9474175   | 2.86535615  | 3.1216537   | 3.16718545  |
| "Ftsjd2"     | 6.3069818   | 6.7253455   | 5.92857195  | 6.4063344   | 6.46037185  | 6.526221    | 6.361958    | 6.25127715  |
| "Fubp1"      | 6.4590048   | 7.223945375 | 6.383400175 | 6.347387025 | 6.5680179   | 7.0329412   | 6.4293572   | 6.4626295   |
| "Fuca1"      | 6.544937967 | 6.114906367 | 6.389249667 | 6.025213667 | 6.335443767 | 5.935262333 | 6.327664833 | 6.1634541   |
| "Fuca2"      | 5.871279    | 6.1079416   | 6.201597    | 6.2661934   | 6.0854254   | 5.8366637   | 5.7525897   | 6.467456    |
| "Fundc1"     | 6.99507935  | 6.7853672   | 8.2537492   | 8.07490015  | 7.29267725  | 7.1768075   | 7.9517205   | 8.123635    |
| "Fundc2"     | 9.3357564   | 9.851038367 | 10.06776133 | 10.33800817 | 9.64789     | 9.5463691   | 9.610557633 | 10.36444767 |
| "Furin"      | 4.9426627   | 5.227387    | 4.069588    | 4.029906    | 4.4967933   | 4.632053    | 4.1468673   | 4.2415185   |
| "Fus"        | 7.745725067 | 8.2557465   | 8.516794333 | 8.1047499   | 7.847277333 | 8.63243     | 8.083630233 | 8.2149996   |
| "Fut8"       | 6.496243    | 6.1780124   | 6.8752656   | 7.035808    | 6.581234    | 6.3721833   | 6.8576164   | 6.9645575   |
| "Fut9"       | 2.921082    | 3.1579578   | 3.0362127   | 3.2437844   | 3.0453339   | 2.962267    | 3.0381238   | 3.1637278   |
| "Fxc1"       | 7.7989772   | 8.062237825 | 7.74965125  | 7.91046245  | 7.759707425 | 7.80211725  | 8.2453481   | 7.832081025 |
| "Fxn"        | 7.806875    | 8.190766    | 8.464452    | 8.44402     | 8.177014    | 7.7181754   | 8.5701      | 8.373466    |
| "Fxr1"       | 10.833964   | 11.25640675 | 11.545362   | 11.699784   | 11.034917   | 11.0205145  | 11.2695905  | 11.642207   |
| "Fxr2"       | 6.752003    | 6.951955    | 6.7629004   | 6.744833    | 6.5696898   | 6.901933    | 6.9510508   | 6.7251616   |
| "Fxyd1"      | 11.534189   | 11.730425   | 11.816909   | 11.653999   | 11.798376   | 11.341246   | 11.526274   | 11.556693   |
| "Fxyd2"      | 3.009301    | 3.0481798   | 3.3671664   | 3.28203365  | 3.545924075 | 3.437008625 | 3.350971325 | 3.201396575 |
| "Fxyd3"      | 3.7003963   | 3.1952126   | 5.030446    | 3.4799592   | 4.0068226   | 3.0528946   | 3.44912     | 3.4668176   |
| "Fxyd5"      | 6.8563933   | 5.451534    | 6.4983096   | 5.9161515   | 6.072715    | 7.092849    | 6.403605    | 5.799719    |
| "Fxyd6"      | 7.854859    | 6.7291584   | 8.074099    | 8.00641     | 7.801578    | 6.55243     | 7.9470625   | 8.400132    |
| "Fxyd7"      | 2.2249873   | 2.433984    | 2.2537177   | 2.3532717   | 2.2562907   | 2.2181997   | 2.2521162   | 2.342351    |
| "Fyb"        | 6.184337    | 4.497683    | 4.4681563   | 4.0267105   | 4.3416266   | 6.7979918   | 5.4841386   | 3.432677    |
| "Fyco1"      | 10.903176   | 11.117847   | 11.436894   | 11.39145    | 11.367493   | 10.73878    | 11.164306   | 11.328668   |
| "Fyn"        | 6.4837142   | 6.056633    | 6.23000465  | 5.72819065  | 6.4079465   | 6.7737639   | 6.168185    | 5.89133615  |
| "Fytt1"      | 6.763774667 | 7.1907349   | 7.718374133 | 7.951916833 | 7.170810767 | 6.850005567 | 7.429652567 | 7.7535955   |
| "Fzd1"       | 2.3899565   | 2.5276914   | 2.4515295   | 2.5721126   | 2.4576826   | 2.411275    | 2.4507809   | 2.5729852   |
| "Fzd2"       | 2.6648591   | 2.5349185   | 2.87224135  | 2.78310895  | 2.79787555  | 2.3957394   | 3.4559195   | 3.2614254   |
| "Fzd3"       | 2.5415549   | 2.69375535  | 2.60219255  | 2.74797535  | 2.60769115  | 2.5457294   | 2.60020965  | 2.70644605  |
| "Fzd4"       | 5.5145872   | 6.8857875   | 4.7947729   | 5.11109855  | 6.81997935  | 6.43582265  | 4.9078412   | 5.3513658   |
| "Fzd5"       | 2.6178608   | 2.6530514   | 2.6557841   | 2.7321496   | 2.6657693   | 2.5818133   | 2.6235347   | 2.7250686   |
| "Fzd6"       | 3.5467064   | 3.7778606   | 3.7411368   | 3.8410223   | 3.907407    | 4.139462    | 3.7729735   | 4.049407    |
| "Fzd7"       | 5.1217158   | 5.13286855  | 5.6532776   | 5.7429286   | 5.5620235   | 4.58497095  | 5.2813768   | 5.9109002   |
| "Fzd8"       | 3.8012688   | 4.936289    | 3.7153106   | 3.8961947   | 3.9458323   | 3.5183315   | 3.6807861   | 3.8960268   |
| "Fzd9"       | 6.292705    | 5.348625    | 5.903367    | 6.5978875   | 5.8001857   | 4.1623755   | 6.5543942   | 6.4928327   |
| "Fzr1"       | 5.2587023   | 5.143967    | 5.4258795   | 5.430794    | 5.4069633   | 5.1563563   | 5.717949    | 5.971012    |
| "G0s2"       | 4.2997036   | 5.935347    | 7.023145    | 7.228384    | 7.961788    | 6.658913    | 9.727598    | 7.7731705   |
| "G3bp1"      | 7.9832825   | 7.9586615   | 8.15769     | 7.923723    | 7.946343    | 7.61191825  | 8.0636125   | 8.0410905   |
| "G3bp2"      | 9.0125932   | 8.530767767 | 9.406125533 | 9.347565233 | 9.356663767 | 9.0497769   | 9.499464167 | 9.309514233 |
| "G6pc"       | 10.281443   | 1.9197693   | 1.9025514   | 1.964596    | 1.9029894   | 1.882157    | 1.9019481   | 1.9654282   |
| "G6pc2"      | 2.490618    | 2.6129227   | 2.572967    | 2.672307    | 2.5801454   | 2.5239267   | 2.566248    | 2.659991    |
| "G6pc3"      | 5.915138    | 6.521814    | 6.290199    | 6.3173804   | 5.8118854   | 5.379162    | 6.1100144   | 6.438916    |
| "G6pd2"      | 2.6098375   | 2.7329608   | 2.6673051   | 2.7925048   | 2.74290365  | 2.82393825  | 2.76862885  | 2.78833     |
| "G6pdx"      | 3.9735787   | 3.982053    | 5.205021    | 3.8859205   | 6.471136    | 5.9383135   | 7.312377    | 4.3214464   |
| "Gaa"        | 9.676488    | 10.041397   | 9.4510965   | 9.39373075  | 9.7119465   | 9.990012    | 9.60028     | 9.443966    |
| "Gab1"       | 6.519653    | 7.5479524   | 6.078582233 | 5.845669767 | 6.762686267 | 7.021102333 | 6.113979567 | 6.1529057   |
| "Gabarap"    | 10.950654   | 10.464766   | 10.633432   | 10.508632   | 10.708479   | 10.6726055  | 11.310849   | 10.569523   |
| "Gabarapl1"  | 11.569522   | 12.37163125 | 8.32710675  | 8.2324355   | 11.244706   | 12.551238   | 8.482776    | 9.035921    |
| "Gabarapl2"  | 10.4533     | 10.566696   | 10.405342   | 10.334997   | 10.403673   | 10.427494   | 10.599587   | 10.401287   |
| "Gabb1"      | 3.0103265   | 3.064809767 | 2.9352638   | 3.346532333 | 3.132162867 | 3.444969167 | 3.009980067 | 3.145204733 |
| "Gabpa"      | 7.02751085  | 7.4217162   | 6.797476    | 7.04057665  | 7.34915775  | 7.15613975  | 6.69929525  | 7.34749425  |
| "Gabpb1"     | 2.351012    | 2.8235046   | 2.40418925  | 2.4736048   | 2.482198    | 2.9415989   | 2.38597265  | 2.492101    |
| "Gabra1"     | 2.5172517   | 2.64517615  | 2.59298065  | 2.7274158   | 2.57360255  | 2.50603425  | 2.55749535  | 2.6753476   |
| "Gabra2"     | 2.544218    | 2.6966171   | 2.5823503   | 2.7147493   | 2.5875041   | 2.535228    | 2.5771592   | 2.6845062   |
| "Gabra6"     | 2.3744503   | 2.58813545  | 2.4185048   | 2.5092728   | 2.424853    | 2.3992692   | 2.404806    | 2.48510595  |
| "Gabrb3"     | 2.536579    | 2.6479778   | 2.5715916   | 2.7095456   | 2.5792341   | 2.5357666   | 2.5733833   | 2.676889    |
| "Gabrg1"     | 2.4944713   | 2.5664504   | 2.5304887   | 2.6305783   | 2.530166    | 2.4585946   | 2.515761    | 2.5990996   |
| "Gabbr1"     | 2.2987146   | 2.6109457   | 2.2428534   | 2.3635578   | 2.3169923   | 2.3086019   | 2.3056467   | 2.349793    |
| "Gabbr2"     | 2.3063462   | 2.2124414   | 2.1464126   | 2.2483091   | 2.255383    | 2.133334    | 2.555209    | 2.2374501   |
| "Gad1"       | 2.736306    | 2.9598582   | 2.8152575   | 2.9764996   | 2.8314614   | 2.776366    | 2.8414693   | 2.9473383   |
| "Gadd45a"    | 12.326198   | 10.741036   | 9.098063    | 8.502762    | 11.392269   | 11.825558   | 10.491113   | 10.222428   |
| "Gadd45b"    | 8.550339    | 9.304477    | 7.8189705   | 7.54264475  | 8.4836405   | 8.796634    | 7.95731375  | 7.85774525  |
| "Gadd45g"    | 12.968509   | 13.590488   | 8.21797     | 10.660922   | 12.498862   | 13.4304695  | 10.83034    | 10.59246    |
| "Gadd45gip1" | 5.854048    | 5.89413295  | 5.88184265  | 5.955348    | 5.87220475  | 5.4534325   | 6.06385975  | 5.940169    |
| "Gak"        | 4.6029266   | 4.7004385   | 4.53456715  | 4.0214632   | 4.53448075  | 4.80175805  | 4.3898692   | 4.3162543   |
| "Gal"        | 2.248423    | 2.3810437   | 2.4000554   | 2.5974627   | 2.3983798   | 2.2871602   | 2.5012295   | 2.4959164   |
| "Galc"       | 3.044746767 | 2.706420533 | 3.208112    | 3.316419533 | 3.418416667 | 3.318271633 | 3.362269433 | 3.279288333 |

|           |             |             |             |             |             |             |             |             |
|-----------|-------------|-------------|-------------|-------------|-------------|-------------|-------------|-------------|
| "Gale"    | 1.8359169   | 1.7898046   | 1.8449585   | 1.8532085   | 1.8425442   | 1.8284705   | 2.421029    | 1.8867434   |
| "Galk1"   | 4.402715    | 3.7680922   | 4.19744     | 4.1381383   | 4.1461987   | 4.077033    | 5.2660913   | 3.9123092   |
| "Galk2"   | 4.5562315   | 4.607717    | 4.6605115   | 4.6632037   | 4.7835674   | 4.6401505   | 4.8632956   | 4.7172666   |
| "Galm"    | 5.693095    | 3.871711    | 3.6601868   | 3.860112    | 4.034876    | 3.667685    | 4.665141    | 3.791522    |
| "Galns"   | 2.6884842   | 2.6608963   | 2.7473702   | 2.8045466   | 2.9973      | 2.6813033   | 2.7313766   | 2.6819298   |
| "Galnt1"  | 7.871004    | 8.495496    | 8.6670195   | 8.9641905   | 8.02347255  | 8.1900165   | 8.529176    | 8.7465035   |
| "Galnt10" | 3.278139    | 3.20461905  | 3.50408685  | 3.416021    | 3.4763803   | 3.37636875  | 3.30770325  | 3.47836925  |
| "Galnt11" | 5.8389745   | 6.0995417   | 5.8429003   | 5.7613873   | 5.5295024   | 5.957576    | 5.7565184   | 5.804412    |
| "Galnt2"  | 8.375789    | 8.259645133 | 8.344625333 | 8.30497     | 7.921128667 | 8.114545767 | 8.568056    | 8.141553333 |
| "Galnt3"  | 2.657144    | 2.73002395  | 2.6872362   | 2.8230804   | 2.74773285  | 2.64687135  | 2.6711582   | 2.7786435   |
| "Galnt4"  | 3.164894    | 2.827491    | 3.57042435  | 3.3389783   | 2.86953305  | 3.46602935  | 3.3232442   | 3.3250485   |
| "Galnt7"  | 4.1483451   | 4.233328767 | 3.9399882   | 4.5261496   | 4.289505467 | 4.616309033 | 4.8106663   | 4.280950933 |
| "Galnt11" | 4.099706    | 4.152211    | 4.1307883   | 4.061057    | 5.290658    | 4.412218    | 3.9351323   | 3.6529953   |
| "Galnt15" | 2.375433    | 2.4689293   | 2.4153593   | 2.4992182   | 2.4231126   | 2.3892717   | 2.4107935   | 2.4826217   |
| "Galr3"   | 5.7889485   | 4.753462    | 5.097495    | 4.3651114   | 4.636731    | 3.970441    | 5.335217    | 4.4526334   |
| "Galt"    | 8.218919    | 7.875841    | 8.022052    | 8.108842    | 8.182304    | 7.6043663   | 7.864095    | 7.9583497   |
| "Gamt"    | 7.038963    | 4.935939    | 6.559684    | 5.9493203   | 5.5467615   | 4.513997    | 6.814731    | 5.521603    |
| "Ganab"   | 3.6269516   | 3.47040605  | 3.4836196   | 3.4982809   | 3.4795805   | 3.8233098   | 3.8036754   | 3.57389835  |
| "Ganc"    | 4.14909     | 4.276231    | 6.007401    | 6.1830616   | 5.829165    | 5.8632417   | 5.9323435   | 6.104589    |
| "Gap43"   | 2.4214935   | 2.4879837   | 2.4480093   | 2.5782526   | 2.435687    | 2.391443    | 2.440459    | 2.5377207   |
| "Gapdh"   | 12.54653058 | 12.8114827  | 13.00484463 | 13.02117683 | 12.684114   | 12.53334293 | 12.83886213 | 12.79934225 |
| "Gar1"    | 7.846183    | 8.590523    | 7.7042737   | 7.7585173   | 7.687708    | 7.777248    | 7.5220456   | 7.5043874   |
| "Gars"    | 9.001525    | 9.453686    | 9.107499    | 9.106595    | 8.913009    | 8.881738    | 9.014027    | 9.086435    |
| "Gart"    | 6.375038433 | 7.109568667 | 6.752664167 | 6.574343    | 6.879467367 | 6.844702533 | 6.421454867 | 6.717775333 |
| "Gas1"    | 8.4219712   | 7.18404425  | 8.85844365  | 8.069285    | 8.37824685  | 7.61964915  | 7.994487    | 8.091233    |
| "Gas2"    | 3.6203525   | 4.0013433   | 4.682582    | 4.7889895   | 3.8600237   | 3.6790922   | 3.738382    | 4.5150623   |
| "Gas5"    | 8.48327006  | 9.8557362   | 7.85535416  | 7.78686882  | 8.6343047   | 9.45890906  | 7.68311294  | 7.83640512  |
| "Gas6"    | 9.331598    | 9.014309    | 10.31732    | 9.428759    | 9.623667    | 9.173019    | 10.441171   | 9.7778845   |
| "Gas7"    | 2.9012196   | 2.98095     | 2.9216337   | 3.0484967   | 2.9010103   | 2.892864    | 2.8940961   | 3.0088897   |
| "Gas8"    | 2.7627902   | 2.936464    | 3.3162196   | 2.9050455   | 2.6586132   | 2.8163986   | 2.8373811   | 2.905911    |
| "Gata1"   | 2.3195548   | 2.3835082   | 2.345777    | 2.6013494   | 2.3427794   | 2.3095148   | 2.3438115   | 2.4321945   |
| "Gata2"   | 5.30258615  | 4.74039505  | 4.0502534   | 4.15461205  | 4.42650315  | 4.8558635   | 4.5031868   | 4.50702525  |
| "Gata3"   | 2.5286746   | 2.6105711   | 2.60147     | 2.679541    | 2.5927818   | 2.5716512   | 2.5974598   | 2.6752207   |
| "Gata6"   | 5.0332932   | 2.8780377   | 2.8503616   | 2.9917972   | 2.9488862   | 3.5569177   | 2.9780333   | 2.9147604   |
| "Gata1d"  | 7.14286575  | 7.30186285  | 7.8024675   | 7.968796    | 7.3582826   | 6.8737125   | 7.7264817   | 7.735599    |
| "Gatad2a" | 6.056746    | 6.227463267 | 5.995319533 | 6.089679133 | 6.055191033 | 6.411004667 | 6.2958806   | 5.942155967 |
| "Gatad2b" | 6.3529515   | 7.171287    | 6.0170474   | 6.3142834   | 6.7802563   | 6.851405    | 5.6717944   | 6.179187    |
| "Gatc"    | 5.954528    | 6.2740803   | 7.105811    | 6.801903    | 5.888721    | 5.415935    | 6.864958    | 6.6559296   |
| "Gatm"    | 6.5246315   | 5.0721593   | 6.50551     | 5.79565     | 6.0638146   | 4.57545     | 6.947612    | 5.803587    |
| "Gatsl2"  | 7.5575595   | 7.8987284   | 8.821052    | 8.602728    | 8.202681    | 7.246391    | 8.185757    | 8.490354    |
| "Gba"     | 7.0947778   | 7.0173284   | 7.235242    | 6.68722895  | 7.1421635   | 7.2017365   | 7.28672175  | 6.51299815  |
| "Gba2"    | 2.7715435   | 2.89046325  | 3.17405225  | 3.2495089   | 3.1769383   | 3.22134555  | 3.36401845  | 3.2711288   |
| "Gbas"    | 11.785523   | 11.95361    | 12.125281   | 12.279045   | 12.131777   | 11.74726    | 12.066267   | 12.371269   |
| "Gbe1"    | 9.426372    | 9.189546    | 8.509835    | 9.420383    | 9.409135    | 8.584477    | 9.674121    | 9.417058    |
| "Gbf1"    | 6.3192795   | 6.5767955   | 6.60030615  | 6.6248533   | 6.331199    | 6.3535175   | 6.4970591   | 6.4902575   |
| "Gbp2"    | 5.98911415  | 4.24718435  | 6.2013221   | 6.4816866   | 6.1092665   | 6.078541    | 7.70439785  | 6.96442295  |
| "Gbp3"    | 6.7132325   | 5.1254177   | 6.918248    | 7.10061     | 6.8528357   | 6.70118     | 6.7113606   | 7.7144127   |
| "Gbp4"    | 2.38922     | 2.478432    | 2.450156    | 2.5480545   | 2.435369    | 2.4169629   | 2.6090846   | 2.5345697   |
| "Gbp6"    | 8.8689995   | 7.3341336   | 4.8579855   | 6.190551    | 7.67133     | 8.577196    | 6.7297754   | 6.2046967   |
| "Gbp7"    | 6.5691525   | 7.1485642   | 7.126408    | 7.6797875   | 6.8117321   | 7.305982    | 8.07299075  | 7.7880826   |
| "Gbp8"    | 2.9168384   | 2.9565554   | 2.8809354   | 3.0227945   | 2.8858979   | 4.713688    | 2.8811743   | 3.0060377   |
| "Gbx2"    | 2.7724028   | 2.8674262   | 2.8246965   | 2.9470952   | 2.8096735   | 2.775255    | 2.8226316   | 2.9033172   |
| "Gc"      | 13.510806   | 2.3297157   | 7.363389    | 2.3936427   | 6.8769445   | 2.236045    | 2.265967    | 5.8821783   |
| "Gca"     | 3.9293699   | 4.1194045   | 4.78431205  | 4.69045     | 4.5408084   | 3.86180785  | 4.7270988   | 4.71661115  |
| "Gcap14"  | 8.570037    | 8.7721815   | 8.986839    | 9.089259    | 8.522853    | 8.058794    | 8.724284    | 9.049969    |
| "Gcap8"   | 2.588548    | 2.7522511   | 2.6494567   | 2.803488    | 2.6626546   | 2.579478    | 2.6520936   | 2.781031    |
| "Gcc1"    | 3.96832965  | 4.3495041   | 4.0634215   | 4.0951815   | 4.0556575   | 4.1751756   | 3.94144945  | 4.1897583   |
| "Gcc2"    | 3.2585602   | 3.4087958   | 3.2965577   | 4.1143737   | 3.3428402   | 3.2497082   | 3.2364721   | 3.5110443   |
| "Gcdh"    | 8.897786    | 7.67268     | 8.210711    | 8.06037     | 8.035444    | 7.3112726   | 8.173837    | 8.275182    |
| "Gcfc1"   | 6.30082675  | 6.193974    | 6.24932365  | 6.4337798   | 6.7095425   | 6.90872375  | 6.70579     | 6.8382961   |
| "Gcg"     | 2.332171    | 2.4001606   | 2.365445    | 2.4798203   | 2.3729105   | 2.348892    | 2.3676598   | 2.4781501   |
| "Gcgr"    | 6.78842     | 2.5300126   | 2.480845    | 2.5386891   | 2.4791307   | 2.397358    | 2.4226193   | 2.5414488   |
| "Gch1"    | 7.9911922   | 3.57283235  | 3.275595    | 3.495456    | 4.15961805  | 3.8971756   | 3.8492148   | 3.45567885  |
| "Gck"     | 2.1837308   | 2.7812567   | 2.212745    | 2.2613037   | 2.2170165   | 2.239014    | 2.2140093   | 2.2785425   |
| "Gckr"    | 5.1166086   | 2.173263    | 2.1523452   | 2.2675824   | 2.1556005   | 2.1229472   | 2.1413684   | 2.2325153   |
| "Gclc"    | 9.6733795   | 8.6073685   | 6.42652795  | 6.93959715  | 7.497931    | 7.86190135  | 6.53176435  | 6.87935985  |
| "Gclm"    | 9.92019     | 9.789013    | 7.9161654   | 8.7462      | 9.128844    | 10.798896   | 8.392276    | 8.428269    |
| "Gcm1"    | 2.3165674   | 2.6498542   | 2.4071188   | 2.4294357   | 2.3522167   | 2.3136063   | 2.352541    | 2.4275227   |
| "Gcm2"    | 2.34950285  | 2.4234316   | 2.36919795  | 2.4794854   | 2.3743709   | 2.33922945  | 2.37181285  | 2.4463971   |
| "Gcnt1"   | 2.6956315   | 2.8446448   | 2.8016307   | 2.91142     | 2.8106172   | 2.7098854   | 2.7921052   | 2.912766    |
| "Gcnt2"   | 3.778574925 | 4.0382079   | 3.641310575 | 3.82227445  | 3.8704559   | 3.936315425 | 3.772172    | 3.963266325 |
| "Gcnt3"   | 2.9416494   | 3.133895    | 3.0589004   | 3.2063851   | 3.0708148   | 2.969203    | 3.0513675   | 3.190085    |
| "Gcsh"    | 10.023128   | 9.609883    | 10.214759   | 10.349115   | 9.90457     | 9.466463    | 10.110301   | 10.564266   |
| "Gda"     | 3.5871508   | 3.637131    | 3.5203497   | 3.6646872   | 4.352841    | 5.049162    | 3.9167717   | 3.4354064   |
| "Gdap1"   | 2.919414975 | 4.152557675 | 5.0181005   | 5.469605725 | 3.06127835  | 4.024458475 | 3.53353075  | 4.40047195  |
| "Gdap10"  | 8.054902    | 8.8189335   | 7.1938415   | 7.9485292   | 8.612898    | 8.92777     | 7.769101    | 7.94752     |
| "Gdap11"  | 2.412343    | 2.464796    | 2.4591732   | 2.5697901   | 2.45611     | 2.412327    | 2.4522862   | 2.5485194   |
| "Gdap2"   | 6.1371264   | 5.973417    | 4.75421     | 4.560396    | 5.801775    | 6.5971236   | 5.346715    | 4.6519513   |
| "Gde1"    | 10.070992   | 9.692291    | 9.665579    | 10.01474    | 9.631434    | 10.143324   | 10.011371   | 9.94683     |
| "Gdf1"    | 2.0092766   | 2.2121527   | 2.88294     | 3.314194    | 2.3540554   | 2.1833045   | 3.0164769   | 2.4011354   |
| "Gdf10"   | 5.6027956   | 5.5321236   | 7.592929    | 6.485945    | 7.39191     | 6.4788704   | 6.320382    | 6.216769    |

|            |             |             |             |             |             |             |             |             |
|------------|-------------|-------------|-------------|-------------|-------------|-------------|-------------|-------------|
| "Gdf15"    | 6.6131635   | 2.3607225   | 2.328833    | 2.3746362   | 2.3268816   | 2.2994275   | 2.332725    | 2.3741598   |
| "Gdf2"     | 3.5026443   | 2.719045    | 2.755648    | 2.8953695   | 2.754082    | 2.735451    | 2.7729933   | 2.7937257   |
| "Gdf5"     | 3.024103    | 3.112042    | 2.9929333   | 3.127396    | 3.012212    | 2.9309247   | 2.9926372   | 3.0700877   |
| "Gdi1"     | 6.5830216   | 6.75685     | 7.012197    | 6.962489    | 7.197277    | 7.1593614   | 7.104009    | 7.0515733   |
| "Gdi2"     | 10.83904983 | 10.3679425  | 10.521331   | 10.35832743 | 10.73610717 | 10.79831767 | 10.767555   | 10.57114808 |
| "Gdpd1"    | 5.7246305   | 5.46631     | 5.5391616   | 5.8691292   | 5.67321665  | 5.4493496   | 6.5802225   | 5.705986    |
| "Gdpd2"    | 2.4458535   | 2.6866317   | 2.513378    | 2.7086897   | 2.5086672   | 2.4568555   | 2.4811113   | 2.6002932   |
| "Gdpd5"    | 3.1076117   | 4.662983    | 4.16455     | 4.670976    | 4.0435815   | 3.948648    | 4.1631546   | 4.6106467   |
| "Gem"      | 3.0244236   | 3.0859792   | 3.0958483   | 3.2501938   | 3.1207674   | 3.0385652   | 3.0993161   | 3.328752    |
| "Gemin6"   | 6.898382    | 7.156288    | 6.7978888   | 7.1972523   | 7.409967    | 7.012889    | 7.255181    | 6.7779503   |
| "Gemin7"   | 8.115959    | 8.521336    | 8.372364    | 8.897295    | 8.039408    | 7.837277    | 8.799261    | 8.5243025   |
| "Gemin8"   | 2.56061495  | 2.52710195  | 2.5264476   | 2.5916052   | 2.52469235  | 2.6074374   | 2.5247475   | 2.5921051   |
| "Get4"     | 7.71607115  | 8.1658876   | 7.930349    | 7.83549925  | 7.8803776   | 8.0761765   | 7.86916755  | 7.7267085   |
| "Gfap"     | 2.2264795   | 2.3525586   | 2.2713392   | 2.4316368   | 2.272874    | 2.250076    | 2.2713342   | 2.4156158   |
| "Gfer"     | 8.48227815  | 8.9404545   | 8.61475865  | 8.6904115   | 8.283169    | 8.0947043   | 9.0958888   | 8.11044485  |
| "Gfi1"     | 2.5929904   | 2.6614249   | 2.604587    | 2.7319515   | 2.6189737   | 2.5856562   | 2.600656    | 2.7085192   |
| "Gfm1"     | 8.00382425  | 8.4367095   | 8.3428507   | 8.7248045   | 8.3065385   | 8.36406525  | 7.90199675  | 8.62566135  |
| "Gfm2"     | 6.981033    | 6.957232    | 7.221062    | 7.5447903   | 7.2588744   | 7.226679    | 7.1760144   | 7.691891    |
| "Gfod2"    | 3.9346802   | 4.116875    | 4.0366015   | 4.515917    | 4.131364    | 3.970863    | 3.904779    | 4.406518    |
| "Gfpt1"    | 2.2657862   | 2.301249    | 2.291502    | 2.353501    | 2.289367    | 2.3453214   | 2.2891853   | 2.3543434   |
| "Gfpt2"    | 3.6291373   | 3.7226086   | 4.5107555   | 3.8453894   | 4.3643737   | 4.812359    | 3.535687    | 3.6234453   |
| "Gfra1"    | 4.1262274   | 2.172223    | 2.140604    | 2.2145398   | 2.163157    | 2.0974388   | 2.129897    | 2.2135668   |
| "Gfra2"    | 2.39132495  | 2.484969    | 2.44671525  | 2.55234075  | 2.4463216   | 2.40955185  | 2.44483925  | 2.5269193   |
| "Gga1"     | 4.8053274   | 5.1482778   | 4.801166    | 4.8308964   | 4.781738    | 4.7976995   | 5.3507924   | 4.8362217   |
| "Gga2"     | 7.3613124   | 6.499709    | 8.073488    | 7.872564    | 7.5162363   | 7.67628     | 8.426447    | 7.6618423   |
| "Ggct"     | 4.66714895  | 3.5317836   | 4.47518435  | 4.1299069   | 3.590824    | 3.34188425  | 3.7852316   | 4.23021415  |
| "Ggcx"     | 2.651292    | 2.501296    | 3.2586522   | 2.7939043   | 2.3663025   | 2.5525076   | 2.728419    | 2.731103    |
| "Ggh"      | 6.926574    | 5.7401266   | 7.7582207   | 7.4929237   | 7.1088996   | 6.871623    | 7.725962    | 7.557556    |
| "Ggnbp1"   | 5.293572    | 5.409345    | 5.213792    | 5.439716    | 5.327639    | 5.0447297   | 5.2877793   | 5.825577    |
| "Ggnbp2"   | 8.09751     | 8.3305425   | 7.2578035   | 6.7881245   | 7.700713    | 7.93297275  | 7.0782465   | 6.9055215   |
| "Ggps1"    | 5.1895131   | 5.91832945  | 5.0932081   | 5.35222075  | 5.4319491   | 5.773440825 | 5.15324535  | 5.5069114   |
| "Ggt5"     | 3.42648205  | 2.79388715  | 3.55097985  | 3.0661011   | 3.64493045  | 3.73182     | 3.93128165  | 3.6169895   |
| "Ggta1"    | 4.9586835   | 8.077188    | 6.131458    | 6.3026257   | 6.685022    | 7.596709    | 6.416294    | 7.0451503   |
| "Gh"       | 2.5889718   | 2.786972167 | 2.677827533 | 2.854264967 | 2.688419833 | 2.629182267 | 2.6788961   | 2.800610233 |
| "Ghdc"     | 3.8237925   | 3.4345877   | 3.0282774   | 2.9940696   | 3.7038844   | 3.6058905   | 3.3458807   | 3.3392847   |
| "Ghitm"    | 11.143242   | 11.348078   | 11.3354185  | 11.471514   | 11.31539175 | 11.3836245  | 11.2892305  | 11.555386   |
| "Ghr"      | 8.146299567 | 8.226006433 | 8.878522133 | 8.368511433 | 8.811694133 | 8.190394333 | 8.942666    | 8.588798133 |
| "Ghrh"     | 2.2542117   | 2.3564177   | 2.2790122   | 2.386275    | 2.2881641   | 2.227406    | 2.2818866   | 2.3702981   |
| "Gif"      | 2.5529373   | 2.6951725   | 2.614994    | 2.7436218   | 2.6125903   | 2.5539725   | 2.60577     | 2.6737325   |
| "Gigyf1"   | 6.8251114   | 7.297981    | 6.543574    | 6.6094418   | 7.0271783   | 6.920768    | 6.5933237   | 6.7265563   |
| "Gigyf2"   | 4.38807555  | 4.4897812   | 4.1395348   | 4.21411395  | 4.29287125  | 4.6016123   | 4.22408995  | 4.2077144   |
| "Gimap1"   | 3.317084    | 3.7341647   | 3.624162    | 3.774327    | 3.6645572   | 5.3077135   | 3.7239454   | 3.7912917   |
| "Gimap4"   | 5.69840485  | 3.7221409   | 5.85573555  | 6.15636115  | 5.73348165  | 7.67652775  | 6.31421785  | 6.1651039   |
| "Gimap6"   | 6.0010724   | 6.36743     | 6.2078934   | 6.424586    | 6.7137437   | 7.830949    | 6.834658    | 6.530165    |
| "Gimap7"   | 2.0235415   | 2.068664    | 2.043617    | 2.1212862   | 2.0436764   | 2.455809    | 2.0504408   | 2.1076486   |
| "Gins1"    | 5.717291    | 6.53228     | 5.169115    | 5.5441694   | 6.6140103   | 6.1520305   | 5.408422    | 5.683614    |
| "Gins4"    | 7.122438    | 7.2130556   | 6.891678    | 7.318012    | 7.1864066   | 6.948095    | 7.4881086   | 7.1403317   |
| "Gipc1"    | 4.247852    | 4.2400947   | 4.7955303   | 4.5649657   | 3.9805639   | 4.1177387   | 4.2717614   | 4.318502    |
| "Gipc2"    | 2.3967185   | 2.4866917   | 2.4302087   | 2.5282347   | 2.424109    | 2.3934004   | 2.4382234   | 2.5313473   |
| "Git1"     | 4.3843093   | 4.4980187   | 4.476072    | 4.552619    | 4.490401    | 4.360127    | 4.6430974   | 4.6487503   |
| "Git2"     | 4.71947645  | 5.0749865   | 4.86606945  | 4.73994015  | 5.14564     | 5.67129175  | 4.8666844   | 4.94835915  |
| "Gja1"     | 5.63018655  | 6.112723017 | 7.107645133 | 6.831549167 | 6.801910517 | 6.533123083 | 6.646676117 | 6.829197883 |
| "Gja4"     | 3.5362043   | 3.2497113   | 3.1998236   | 3.2864103   | 3.6799037   | 3.1608293   | 3.0810125   | 3.0414338   |
| "Gja5"     | 2.4821339   | 2.5758667   | 2.5259902   | 2.6448007   | 2.5350394   | 2.499451    | 2.5301619   | 2.6255703   |
| "Gjb1"     | 4.0613856   | 2.33887145  | 2.3397075   | 2.4037304   | 2.3198761   | 2.29202735  | 2.3154652   | 2.38740095  |
| "Gjb2"     | 7.452399    | 2.3945131   | 2.430531    | 2.4808636   | 2.452106    | 2.3873074   | 2.4291644   | 2.4786015   |
| "Gjb3"     | 3.1326544   | 3.3931386   | 3.369287    | 3.4409883   | 3.3688214   | 3.3172207   | 3.3743827   | 3.4352913   |
| "Gjb6"     | 2.561818    | 2.740525    | 2.7237754   | 2.8191886   | 2.699865    | 2.5770328   | 2.686735    | 2.7888155   |
| "Gjc1"     | 6.25737     | 6.265231    | 6.5409136   | 6.3921213   | 6.983169    | 6.764165    | 6.5747566   | 6.63842     |
| "Gjc2"     | 2.43407215  | 2.6649257   | 2.5508871   | 2.62291435  | 2.4776318   | 2.42464725  | 2.45318885  | 2.5358541   |
| "Gjd4"     | 2.3705015   | 2.4176795   | 2.3890798   | 2.467872    | 2.3897488   | 2.3611734   | 2.3851755   | 2.4659708   |
| "Gk2"      | 2.484935    | 2.5800292   | 2.5163589   | 2.6519845   | 2.53052     | 2.4738526   | 2.5153039   | 2.6295147   |
| "Gkap1"    | 8.880119    | 9.050188    | 8.916595    | 8.9807825   | 8.9998      | 9.070587    | 9.163716    | 9.068192    |
| "Gkn1"     | 2.375111    | 2.44020855  | 2.40331705  | 2.555478    | 2.41105975  | 2.37319005  | 2.404144    | 2.50695345  |
| "Gkn2"     | 2.571726    | 2.6680572   | 2.6279418   | 2.735892    | 2.6206863   | 2.5713732   | 2.607318    | 2.7176807   |
| "Gla"      | 2.67981565  | 2.798169    | 2.881521    | 2.86324635  | 2.73009405  | 2.67668305  | 2.719646    | 2.8307989   |
| "Glb1"     | 3.296854    | 2.35454     | 3.6514857   | 2.9837215   | 3.466496    | 3.8922005   | 4.0092773   | 3.0583537   |
| "Glb1l"    | 2.885641    | 2.9615736   | 2.9308238   | 3.115078    | 2.9515858   | 2.8316545   | 2.9403405   | 3.0472293   |
| "Glcc1"    | 2.96924055  | 3.84195825  | 3.15131995  | 3.8760475   | 3.87616315  | 4.804617    | 3.2222438   | 3.24633265  |
| "Glce"     | 7.5808144   | 6.915018    | 7.199771    | 6.775231    | 7.1393285   | 7.4082055   | 7.020054    | 6.989301    |
| "Gldc"     | 4.4263453   | 2.4787054   | 2.4679015   | 2.5273497   | 2.469571    | 2.4416988   | 2.4677577   | 2.520546    |
| "Gle1"     | 6.6367679   | 7.332375    | 6.579973    | 6.49518685  | 6.80866925  | 6.70824725  | 6.7676233   | 6.62957335  |
| "Glg1"     | 7.326277667 | 7.172231167 | 7.5352592   | 6.992516233 | 7.493964433 | 7.504509133 | 7.295317867 | 7.1080672   |
| "Gli1"     | 2.2922063   | 2.436099    | 2.318618    | 2.4490616   | 2.3367567   | 2.2898445   | 2.3244324   | 2.4190938   |
| "Gli2"     | 3.21789645  | 3.360681    | 3.31961525  | 3.38361395  | 3.3004815   | 3.176755    | 3.25168315  | 3.3854245   |
| "Glipr1"   | 2.8295305   | 2.3241718   | 2.4696445   | 2.50949     | 2.4666553   | 5.629094    | 2.9582856   | 2.5108643   |
| "Glipr1l2" | 2.3921661   | 2.4787781   | 2.4274964   | 2.5363202   | 2.4232755   | 2.3891168   | 2.41966     | 2.52823     |
| "Glipr2"   | 2.42757775  | 2.5329522   | 2.506699    | 2.54821845  | 2.50322345  | 2.48803595  | 2.5027386   | 2.5459161   |
| "Glis2"    | 2.2737399   | 2.24304755  | 3.1840192   | 2.38772295  | 2.16101635  | 2.25988605  | 2.4378047   | 2.34350085  |
| "Glmn"     | 3.6838038   | 4.101988    | 5.1248255   | 4.5656586   | 4.4355145   | 3.7693052   | 4.788106    | 4.9351535   |
| "Glo1"     | 9.9332375   | 9.945063    | 10.22302433 | 10.36389533 | 9.746604667 | 9.618520333 | 9.825102333 | 10.291264   |

|           |             |             |             |             |             |             |             |             |
|-----------|-------------|-------------|-------------|-------------|-------------|-------------|-------------|-------------|
| "Glod4"   | 7.999208    | 7.6684985   | 8.481766    | 8.20457     | 8.169328    | 7.6713448   | 8.58763     | 8.0741      |
| "Glr1"    | 2.3491013   | 2.4551754   | 2.426355    | 2.4906023   | 2.4338174   | 2.3927732   | 2.4328966   | 2.5030985   |
| "Glr3"    | 2.46166     | 2.5763912   | 2.505344    | 2.5966878   | 2.5070782   | 2.4614902   | 2.5031996   | 2.5908246   |
| "GlrB"    | 3.2078948   | 3.621697    | 3.391963    | 3.5746284   | 3.391173    | 3.261935    | 3.35534     | 3.4981701   |
| "GlrX"    | 7.3180577   | 6.56351675  | 7.0382035   | 7.1108315   | 6.5570123   | 7.15797015  | 7.009897    | 6.97609115  |
| "GlrX2"   | 9.358814333 | 9.472786333 | 9.593914667 | 9.756283167 | 9.342206333 | 9.178390667 | 9.932059667 | 9.575587333 |
| "GlrX3"   | 10.253363   | 10.50504    | 10.3705815  | 11.028806   | 10.425755   | 10.2358985  | 11.0046595  | 11.125139   |
| "Git25d1" | 7.05914025  | 6.9150855   | 6.97507575  | 6.5853409   | 7.00321655  | 6.7817974   | 6.5313155   | 6.57034525  |
| "GltP"    | 7.656314    | 6.419412    | 8.3929615   | 6.928822    | 7.5974936   | 8.126898    | 7.821068    | 7.3360786   |
| "Gltpd1"  | 5.817231    | 5.838903    | 6.0364513   | 6.2947392   | 5.1283126   | 5.388747    | 6.752327    | 6.0776362   |
| "Gltscr2" | 6.989462367 | 7.263010167 | 6.990729667 | 6.837430733 | 7.078047367 | 7.219304767 | 6.803354733 | 6.857626367 |
| "Glud1"   | 10.4069615  | 9.4905045   | 9.9416805   | 9.8657555   | 10.0488595  | 10.37545625 | 9.873958    | 10.083592   |
| "Glul"    | 12.754804   | 13.220558   | 10.393636   | 10.119787   | 12.6140955  | 13.1682165  | 11.2006905  | 10.875191   |
| "Glyat"   | 6.304214    | 3.2019878   | 3.09329467  | 3.230844633 | 3.0960141   | 2.9987491   | 3.071704633 | 3.188565933 |
| "Glycam1" | 2.5294313   | 2.6504414   | 2.580316    | 2.6932871   | 2.5878937   | 9.99937     | 2.584526    | 2.6736333   |
| "Glyctk"  | 3.7546897   | 2.2842817   | 2.2465768   | 2.3430805   | 2.245845    | 2.224446    | 2.251285    | 2.325124    |
| "Glyr1"   | 9.167922    | 9.924382    | 8.896707    | 8.881877    | 9.197887    | 9.915701    | 8.815784    | 8.817344    |
| "Gm10015" | 8.686537325 | 9.074463    | 9.0891425   | 9.1315105   | 8.69825275  | 9.00647925  | 9.1584645   | 9.04792925  |
| "Gm10020" | 13.302241   | 13.354579   | 13.465745   | 13.194788   | 13.303449   | 13.284506   | 13.690727   | 13.368565   |
| "Gm10045" | 9.770269233 | 9.9589254   | 9.756826    | 9.8470426   | 9.6281112   | 9.728597167 | 9.963245267 | 9.9685001   |
| "Gm10051" | 13.541607   | 13.660883   | 13.445166   | 13.18652    | 13.396722   | 13.4286175  | 13.712063   | 13.173893   |
| "Gm10052" | 10.340167   | 11.273083   | 9.296748    | 9.267282    | 10.630951   | 11.31341    | 9.286078    | 9.466126    |
| "Gm10055" | 2.598721    | 2.7961075   | 2.6843498   | 2.78575     | 2.6563919   | 2.5868032   | 2.6384592   | 2.7647731   |
| "Gm10058" | 3.295352    | 3.5781813   | 3.38849415  | 3.4810942   | 3.31184685  | 3.2007702   | 3.29788775  | 3.3858051   |
| "Gm10063" | 12.8090385  | 13.031687   | 12.80433375 | 12.605818   | 12.800946   | 12.784083   | 12.9814095  | 12.5855455  |
| "Gm10071" | 13.60917767 | 13.81458667 | 13.660718   | 13.43813267 | 13.52655567 | 13.51266767 | 13.85247967 | 13.44550067 |
| "Gm10094" | 8.4823539   | 8.5522699   | 8.58218702  | 8.48438446  | 8.41004502  | 8.48434286  | 8.68166994  | 8.48365     |
| "Gm10132" | 11.7988172  | 11.92447426 | 11.83763352 | 11.72614518 | 11.7544346  | 11.754699   | 11.9239016  | 11.6438488  |
| "Gm10166" | 13.92541933 | 13.829245   | 13.87417    | 13.836962   | 13.73353483 | 13.966913   | 14.27260767 | 13.89607317 |
| "Gm10177" | 11.2604265  | 11.416051   | 11.48795    | 11.201196   | 11.099724   | 10.890647   | 11.532537   | 11.230985   |
| "Gm10193" | 6.1792379   | 6.12817288  | 6.58039146  | 6.6778289   | 6.19484142  | 6.13087792  | 6.67720256  | 6.47201808  |
| "Gm10224" | 9.129457    | 9.939682    | 10.153171   | 10.053663   | 9.83379     | 9.609816    | 9.500623    | 10.364064   |
| "Gm10228" | 2.323414    | 2.4085827   | 2.3597417   | 2.4699574   | 2.3633938   | 2.3218238   | 2.358153    | 2.4566443   |
| "Gm10256" | 2.785204    | 2.9547791   | 2.8118913   | 2.9727411   | 2.8227363   | 2.72729     | 2.8170867   | 2.9182591   |
| "Gm10257" | 12.248636   | 12.0889825  | 12.6154635  | 12.481196   | 12.3636485  | 12.4143215  | 12.530443   | 12.534049   |
| "Gm10302" | 3.3024697   | 3.5132656   | 3.3952951   | 3.5687218   | 3.4163435   | 3.3139126   | 3.3805912   | 3.48009     |
| "Gm10334" | 2.7095075   | 2.8649604   | 2.732292    | 2.877305    | 2.737017    | 2.6914003   | 2.729393    | 2.8221188   |
| "Gm10340" | 6.2990665   | 8.158352    | 6.90526775  | 6.7100904   | 6.75809535  | 7.67188475  | 6.78441145  | 6.92404245  |
| "Gm10349" | 9.302988333 | 9.666279    | 9.8949434   | 9.8801955   | 9.2995625   | 9.1526268   | 9.939649867 | 9.8496665   |
| "Gm10374" | 5.765533    | 6.313055    | 5.704021    | 5.483837    | 6.2968807   | 5.9456997   | 5.8586926   | 5.3533354   |
| "Gm10393" | 8.268238    | 8.600715    | 9.474564    | 8.9834385   | 9.016773    | 9.168484    | 9.336623    | 8.853716    |
| "Gm10420" | 14.1487875  | 14.2259375  | 14.2460345  | 13.9254855  | 14.139235   | 14.0590145  | 14.226148   | 13.9310935  |
| "Gm10439" | 3.1839395   | 3.8844461   | 5.1219783   | 3.2486362   | 3.0915477   | 2.6671066   | 3.2627466   | 2.8900435   |
| "Gm10499" | 2.7611637   | 2.952454    | 2.8083725   | 2.9337702   | 2.8123713   | 2.7637668   | 2.803698    | 2.94196     |
| "Gm10651" | 9.125301    | 8.332372    | 7.7638893   | 7.816636    | 8.734616    | 9.296628    | 8.23516     | 7.991348    |
| "Gm10693" | 2.8071516   | 2.2538328   | 2.2615457   | 2.3039882   | 2.2665057   | 2.4048584   | 2.271375    | 2.313361    |
| "Gm10817" | 2.6199646   | 2.7249537   | 2.682491    | 2.8104388   | 2.6910586   | 2.6584778   | 2.6874804   | 2.811818    |
| "Gm10913" | 12.8141305  | 12.927459   | 12.84634625 | 12.57334575 | 12.73525325 | 12.70132025 | 13.05093925 | 12.5728875  |
| "Gm10921" | 2.3648472   | 2.4622316   | 2.413069    | 2.4970343   | 2.408491    | 2.3639743   | 2.404981    | 2.4829144   |
| "Gm11362" | 13.312416   | 13.355273   | 13.437802   | 13.004813   | 13.24536    | 13.37307    | 13.621421   | 13.09855    |
| "Gm11425" | 10.08237917 | 10.698082   | 10.11458543 | 9.703229333 | 10.18158167 | 10.29362063 | 10.28004987 | 9.833833433 |
| "Gm11478" | 14.232646   | 14.163082   | 14.049824   | 13.927999   | 14.020687   | 14.095621   | 14.375419   | 13.974106   |
| "Gm11517" | 6.9531484   | 7.90068     | 6.742844    | 7.2864676   | 7.2896237   | 6.945217    | 6.6380644   | 7.102056    |
| "Gm11554" | 2.5356956   | 2.609213    | 2.5963087   | 2.6263516   | 2.589981    | 2.5305555   | 2.5751293   | 2.6158552   |
| "Gm11567" | 2.4830694   | 2.5432386   | 2.5026913   | 2.6061153   | 2.5053725   | 2.4777453   | 2.4990015   | 2.589892    |
| "Gm11677" | 5.0005903   | 5.99147     | 5.764271    | 5.7662253   | 5.363608    | 5.003715    | 5.7642255   | 5.415957    |
| "Gm11694" | 14.3291855  | 14.164763   | 14.262396   | 14.259716   | 14.178671   | 14.208578   | 14.435756   | 14.256027   |
| "Gm11767" | 2.5449789   | 2.6188488   | 2.5775013   | 2.6646602   | 2.588677    | 2.5423527   | 2.5776162   | 2.6609616   |
| "Gm11787" | 5.9713065   | 4.75971815  | 5.3937252   | 5.20665735  | 5.26442265  | 6.3790213   | 5.5797643   | 5.2367617   |
| "Gm11793" | 9.8620545   | 10.4970405  | 9.5349485   | 9.6320215   | 10.117073   | 10.6445925  | 9.627935    | 9.623665    |
| "Gm11810" | 13.316936   | 13.400494   | 13.351635   | 13.152186   | 13.297328   | 13.384027   | 13.529641   | 13.101323   |
| "Gm12185" | 2.255857    | 2.4613867   | 2.2672193   | 2.3821127   | 2.287397    | 2.2704036   | 2.2789943   | 2.3658288   |
| "Gm12191" | 13.0850725  | 13.434831   | 13.098189   | 13.127197   | 13.037719   | 12.923223   | 13.248533   | 13.031268   |
| "Gm12264" | 3.4972253   | 3.8023136   | 3.8440285   | 3.8729677   | 3.8058865   | 3.604647    | 3.8393373   | 3.8645055   |
| "Gm12372" | 9.836123    | 10.3126815  | 9.6728695   | 10.137727   | 9.966383    | 9.700919    | 9.67829675  | 9.988999    |
| "Gm12538" | 7.7866697   | 7.846922    | 7.956222    | 7.9779234   | 8.959398    | 8.72438     | 8.294588    | 8.02613     |
| "Gm12568" | 11.356885   | 12.031957   | 11.7866535  | 11.872666   | 11.813227   | 11.736521   | 11.650879   | 11.881352   |
| "Gm12597" | 2.5083065   | 2.6275482   | 2.5588455   | 2.6936622   | 2.5682058   | 2.512658    | 2.5573597   | 2.6894727   |
| "Gm12606" | 2.3352454   | 2.4283867   | 2.371808    | 2.4910762   | 2.3839922   | 2.343474    | 2.3797646   | 2.4718904   |
| "Gm12657" | 11.99541767 | 11.56928933 | 11.13807933 | 10.82739333 | 11.379614   | 11.78293917 | 11.327873   | 10.99139417 |
| "Gm12693" | 10.938425   | 11.164991   | 11.252676   | 11.397393   | 10.873409   | 10.4510975  | 11.511542   | 11.455974   |
| "Gm12816" | 7.1528085   | 7.7585985   | 7.01840785  | 6.597184    | 7.21642395  | 7.509967    | 7.3317338   | 6.7826225   |
| "Gm12854" | 8.329995    | 6.964422    | 9.118621    | 8.033221    | 8.754209    | 8.411786    | 9.16391     | 8.224774    |
| "Gm12942" | 5.42619     | 5.3058233   | 5.413528    | 5.562177    | 6.0102158   | 6.102325    | 6.0646343   | 5.434937    |
| "Gm12952" | 9.229223    | 9.988834    | 8.9122305   | 9.101094    | 9.241708    | 9.050798    | 9.151195    | 9.112958    |
| "Gm13023" | 2.8705976   | 3.1010215   | 2.9729805   | 3.1596236   | 2.985508    | 2.8920128   | 2.9659736   | 3.1164396   |
| "Gm13102" | 2.967302    | 3.0683978   | 2.9831915   | 3.1237125   | 2.9998744   | 2.995516    | 2.9829662   | 3.096601    |
| "Gm13152" | 2.9044743   | 3.2526796   | 3.1157796   | 3.362737    | 3.1412656   | 3.0058866   | 3.1072607   | 3.2577786   |
| "Gm13271" | 2.42857     | 2.6168776   | 2.7220588   | 2.5744886   | 2.5744715   | 2.5046206   | 2.4729452   | 2.5823925   |
| "Gm13305" | 8.475658    | 8.389775    | 8.644944    | 8.357008    | 8.468796    | 8.205576    | 8.700619    | 8.693824    |
| "Gm13342" | 9.188321667 | 9.2385995   | 9.7255799   | 9.987000333 | 9.602380133 | 9.291369867 | 9.653762333 | 10.04939847 |

|           |             |             |             |             |             |             |             |             |
|-----------|-------------|-------------|-------------|-------------|-------------|-------------|-------------|-------------|
| "Gm13363" | 12.435902   | 11.92041875 | 11.5367365  | 11.7526295  | 12.07297    | 12.14403275 | 11.8090435  | 12.158754   |
| "Gm13369" | 10.800119   | 10.853795   | 10.683787   | 10.912928   | 10.70365    | 10.665027   | 10.632056   | 10.630913   |
| "Gm13430" | 12.52454    | 12.446966   | 13.097801   | 13.011864   | 12.779441   | 12.884201   | 13.139557   | 13.051842   |
| "Gm13502" | 8.15755775  | 4.89211205  | 6.2574157   | 6.2226143   | 5.220437    | 4.71298215  | 5.71303085  | 6.09166485  |
| "Gm13777" | 14.248686   | 14.438702   | 14.206134   | 14.026936   | 14.152208   | 14.140277   | 14.281526   | 14.024789   |
| "Gm13826" | 10.5305575  | 10.57779825 | 10.57012175 | 10.62340363 | 10.386523   | 10.37314275 | 10.79030835 | 10.60978125 |
| "Gm13889" | 6.981062    | 4.0908546   | 4.0039787   | 3.5992298   | 3.9356875   | 4.1659164   | 5.5476365   | 3.7573245   |
| "Gm13981" | 13.833581   | 13.862463   | 13.720443   | 13.486689   | 13.699732   | 13.76171    | 13.973055   | 13.544625   |
| "Gm14059" | 13.998655   | 13.977713   | 13.847352   | 14.000482   | 13.875997   | 13.894802   | 14.090235   | 14.131036   |
| "Gm14085" | 4.8225174   | 3.9565544   | 6.2829375   | 6.8209434   | 6.35736     | 6.475459    | 6.3565574   | 7.4758973   |
| "Gm14217" | 10.254856   | 11.13646583 | 10.71757533 | 10.71065267 | 10.383594   | 10.23679887 | 10.26658187 | 10.76728633 |
| "Gm14277" | 6.979422    | 6.914413    | 6.9366345   | 7.158359    | 6.7198615   | 6.9687963   | 7.273698    | 7.0031767   |
| "Gm14680" | 7.238273    | 8.152714    | 8.231864    | 8.737206333 | 7.6329351   | 7.617034467 | 7.649607333 | 8.3458856   |
| "Gm14698" | 7.920591033 | 8.599114333 | 10.389091   | 10.62398133 | 8.662777833 | 8.794563    | 9.169519    | 10.47878467 |
| "Gm14743" | 2.7679365   | 2.8920627   | 2.7912576   | 2.8933368   | 2.7949798   | 2.7607486   | 2.7887366   | 2.9289753   |
| "Gm15210" | 9.5606585   | 9.9326005   | 9.757114    | 9.48625     | 9.6194435   | 9.69606     | 9.894873    | 9.6684785   |
| "Gm15453" | 10.995421   | 11.86165    | 11.308213   | 11.221988   | 11.186677   | 11.375689   | 11.087704   | 10.590618   |
| "Gm15455" | 6.000719333 | 6.4875219   | 6.241830367 | 6.2112944   | 6.4398488   | 6.484114733 | 6.4981602   | 6.3527544   |
| "Gm15466" | 12.049347   | 11.065663   | 12.340224   | 11.8812275  | 12.062453   | 12.56259    | 12.318668   | 11.932554   |
| "Gm15483" | 10.4391485  | 10.85633538 | 10.614699   | 10.50061088 | 10.63639238 | 10.6595139  | 10.76486095 | 10.45939863 |
| "Gm1549"  | 2.738336    | 3.0047934   | 2.824617    | 2.9428062   | 2.830666    | 2.7823296   | 2.8224325   | 2.9207847   |
| "Gm15501" | 13.27590533 | 13.493595   | 13.283124   | 13.0129233  | 13.22643983 | 13.36290567 | 13.50362367 | 12.94925283 |
| "Gm15583" | 5.06004     | 6.2047763   | 6.8882046   | 7.0960484   | 5.8896832   | 5.6769166   | 6.7144346   | 7.238656    |
| "Gm16136" | 2.3722312   | 2.444361    | 2.6953743   | 2.4742022   | 2.4057677   | 2.3314397   | 2.4121804   | 2.4748025   |
| "Gm16340" | 3.638350467 | 3.074393967 | 3.618187    | 3.812391733 | 3.548002433 | 4.069206233 | 4.1234295   | 4.028758433 |
| "Gm16489" | 2.4158688   | 2.5218513   | 2.4635699   | 2.5287728   | 2.440893    | 2.4303021   | 2.4288366   | 2.5242584   |
| "Gm16499" | 2.3519416   | 2.4446652   | 2.4345229   | 2.454853    | 2.3717477   | 2.3553135   | 2.3706615   | 2.4509702   |
| "Gm16515" | 8.205771    | 8.342051    | 6.2705536   | 6.102092    | 7.280361    | 8.160835    | 6.314007    | 6.0347586   |
| "Gm16516" | 6.413827    | 6.4193296   | 5.440518    | 5.981537    | 6.916813    | 6.874362    | 5.914941    | 5.2745442   |
| "Gm16517" | 6.1927567   | 6.2282457   | 6.1798854   | 6.224052    | 6.1602216   | 5.8392057   | 6.1552515   | 6.282163    |
| "Gm17066" | 4.5918885   | 5.2502874   | 5.100965333 | 5.145271067 | 5.099454967 | 5.007195    | 5.0387021   | 5.081930567 |
| "Gm17275" | 2.5443518   | 2.7168274   | 2.681864    | 3.43905     | 2.4653842   | 2.60054     | 2.5347314   | 3.2235456   |
| "Gm17546" | 2.823666    | 2.8738945   | 2.906506    | 3.4092371   | 2.9040265   | 2.4797173   | 3.0913813   | 3.311797    |
| "Gm17748" | 5.057468    | 5.235562    | 5.583626533 | 5.425411033 | 4.8779668   | 4.8952021   | 5.358082333 | 5.284644967 |
| "Gm1821"  | 14.34252633 | 14.60077233 | 14.12214483 | 13.83549667 | 14.41703533 | 14.67304967 | 14.08541067 | 13.87272467 |
| "Gm19322" | 2.390226    | 2.4304914   | 2.398562    | 2.4600918   | 2.3991623   | 2.3373635   | 2.3977618   | 2.460243    |
| "Gm19361" | 6.654899    | 6.840319    | 6.651108    | 6.418611    | 6.6990333   | 6.653821    | 6.4197345   | 6.732752    |
| "Gm19420" | 11.817329   | 12.165308   | 12.217187   | 12.26602    | 11.782729   | 11.720482   | 12.054753   | 12.156035   |
| "Gm19486" | 10.812471   | 11.265303   | 11.204313   | 11.295956   | 10.952413   | 10.663543   | 11.201418   | 11.151695   |
| "Gm19491" | 2.410358    | 2.464571    | 2.4212937   | 2.5217032   | 2.436356    | 2.3730016   | 2.3841972   | 2.7490184   |
| "Gm19496" | 6.9575086   | 6.0117636   | 6.7171974   | 7.2636733   | 6.518861    | 6.258167    | 7.283978    | 7.2898483   |
| "Gm19531" | 2.9231448   | 3.1615891   | 2.9186418   | 3.1494946   | 2.9702582   | 2.938356    | 3.0723734   | 3.0522594   |
| "Gm19579" | 9.061828    | 9.620618    | 8.749348    | 9.149018    | 9.365647    | 9.91284     | 8.755041    | 9.068336    |
| "Gm19597" | 3.3242705   | 5.381098    | 4.2084856   | 4.243863    | 3.7785215   | 4.545013    | 3.8018856   | 4.4000416   |
| "Gm19631" | 6.7964234   | 7.1469016   | 6.2238355   | 7.2953343   | 7.1404195   | 7.114949    | 5.8552876   | 7.5887866   |
| "Gm1971"  | 2.3631704   | 2.4567325   | 2.4051802   | 2.486299    | 2.405353    | 2.3608913   | 2.4006083   | 2.5029      |
| "Gm1976"  | 2.2715018   | 2.3320684   | 2.3272347   | 2.4090442   | 2.3210797   | 2.3074312   | 2.3050508   | 2.5793018   |
| "Gm19774" | 10.919552   | 10.877867   | 11.328277   | 10.966808   | 10.835519   | 10.627109   | 11.567373   | 11.031229   |
| "Gm19831" | 6.1745515   | 6.1945276   | 6.1100597   | 6.36099     | 6.185143    | 6.0283427   | 6.110131    | 6.4566736   |
| "Gm19974" | 5.1284246   | 5.3163033   | 5.2472053   | 5.568797    | 5.246679    | 4.9692645   | 5.0525475   | 5.3980575   |
| "Gm19980" | 2.9374397   | 3.1702209   | 3.1038132   | 3.235297    | 3.164151    | 4.833747    | 3.0074265   | 3.2448792   |
| "Gm20274" | 3.150652    | 3.809219    | 3.3155606   | 3.3268726   | 3.4199998   | 3.503955    | 3.5821395   | 3.227445    |
| "Gm20362" | 3.5598098   | 4.1045731   | 3.82100765  | 3.9090259   | 3.80598965  | 3.6786555   | 3.7879417   | 3.90428755  |
| "Gm20559" | 4.856008    | 4.8460698   | 5.7869632   | 5.88358905  | 5.7245252   | 6.15506985  | 6.14328265  | 6.1308334   |
| "Gm20605" | 3.070130467 | 3.323215467 | 3.236871    | 3.3179849   | 3.259752033 | 3.2352332   | 3.2622222   | 3.181728867 |
| "Gm2083"  | 12.602117   | 9.1006975   | 11.747313   | 7.853285    | 12.210608   | 8.646907    | 10.033711   | 12.363669   |
| "Gm2382"  | 7.799918    | 7.044087    | 7.253944    | 7.758848    | 7.0669847   | 6.704485    | 7.684451    | 7.5736737   |
| "Gm2695"  | 5.0761614   | 5.145953    | 5.160247    | 5.4953465   | 5.105586    | 4.7473392   | 5.409479    | 5.3049126   |
| "Gm2710"  | 12.087246   | 12.701045   | 12.495642   | 12.577937   | 12.532102   | 12.588467   | 12.466179   | 12.608066   |
| "Gm2a"    | 6.40354185  | 5.80899185  | 6.2555735   | 5.592766    | 6.43565035  | 6.6309219   | 6.62624265  | 6.0415795   |
| "Gm3244"  | 12.472284   | 12.8400975  | 13.010601   | 13.1472565  | 12.7636145  | 12.430518   | 12.834109   | 12.933259   |
| "Gm3258"  | 9.81263     | 10.356495   | 9.019213    | 9.080361    | 9.66444     | 10.080645   | 9.17738     | 9.0574875   |
| "Gm3417"  | 2.90732995  | 3.3709957   | 3.00024035  | 3.16784085  | 3.02628635  | 2.9286698   | 2.9815335   | 3.1060646   |
| "Gm3470"  | 6.498531    | 5.1663885   | 5.2916336   | 5.4821424   | 5.8477807   | 5.999254    | 6.0333624   | 5.420164    |
| "Gm3579"  | 6.1357041   | 3.2484839   | 3.1849938   | 2.9589147   | 3.7003754   | 5.2007235   | 2.5336694   | 3.04094565  |
| "Gm3650"  | 5.2248354   | 4.9597297   | 4.4487414   | 4.7357965   | 5.4226007   | 5.1826615   | 5.5577283   | 4.884491    |
| "Gm3716"  | 2.3590922   | 2.445027    | 2.4030356   | 2.4998724   | 2.4063864   | 2.3436532   | 2.4043846   | 2.4743648   |
| "Gm3776"  | 7.6864095   | 3.39547     | 3.5313094   | 3.1147826   | 5.255966    | 2.9628656   | 4.588339    | 3.1150756   |
| "Gm3837"  | 12.570993   | 12.7843     | 12.656982   | 12.685181   | 12.476223   | 12.346167   | 12.855642   | 12.513811   |
| "Gm4024"  | 9.02449075  | 8.8856095   | 9.039151    | 9.35037925  | 9.19486775  | 8.93419975  | 9.23666925  | 9.46342275  |
| "Gm4354"  | 10.687519   | 10.7469535  | 11.1339155  | 10.3923885  | 10.648695   | 10.92426    | 10.7058     | 10.6431135  |
| "Gm4604"  | 13.01268    | 13.19067767 | 12.90059367 | 12.797656   | 12.8879525  | 12.851293   | 13.24119433 | 12.71694133 |
| "Gm4705"  | 13.079748   | 13.1955215  | 13.0032115  | 12.8023965  | 13.062448   | 13.106225   | 13.1665855  | 12.9362435  |
| "Gm4736"  | 3.7043984   | 3.9028099   | 3.8132217   | 3.9191244   | 4.110431    | 4.001999    | 3.8158765   | 3.886296    |
| "Gm4802"  | 3.0520072   | 3.1495626   | 3.0928676   | 3.210379    | 3.1331682   | 3.052028    | 3.1329033   | 3.700644    |
| "Gm4887"  | 4.5525368   | 4.1894938   | 4.335789333 | 4.019341667 | 4.3019944   | 4.342420433 | 4.332565133 | 4.127987067 |
| "Gm4943"  | 11.676594   | 11.780972   | 12.141951   | 12.251537   | 12.164846   | 11.467951   | 11.950781   | 12.149448   |
| "Gm5093"  | 2.397328    | 2.5610917   | 2.3278463   | 2.4281487   | 2.3450856   | 2.5774736   | 2.3284116   | 2.4217367   |
| "Gm5161"  | 6.576003    | 6.860097    | 6.5831366   | 6.105983    | 6.447104    | 6.542008    | 6.5480213   | 6.267921    |
| "Gm5526"  | 11.4052165  | 11.1954795  | 11.913533   | 11.3179995  | 11.686441   | 11.5820495  | 11.6474705  | 11.2804085  |
| "Gm5553"  | 5.063014    | 4.0578885   | 4.1644464   | 3.294401    | 3.9930475   | 4.8172398   | 4.8479137   | 3.4812508   |

|          |             |             |             |             |             |             |             |             |
|----------|-------------|-------------|-------------|-------------|-------------|-------------|-------------|-------------|
| "Gm5595" | 3.93223875  | 3.97927965  | 4.10271415  | 4.858129    | 4.29428935  | 3.93131395  | 4.08689655  | 5.0934715   |
| "Gm561"  | 10.092787   | 10.212651   | 10.441246   | 10.605787   | 10.247005   | 9.664156    | 10.501584   | 10.657343   |
| "Gm5616" | 9.7747065   | 10.125168   | 10.1535845  | 10.0369195  | 9.980132    | 9.999077    | 10.1068145  | 9.986015    |
| "Gm5617" | 6.013516    | 5.425069    | 5.4170403   | 5.9602356   | 5.872017    | 5.534513    | 6.8155856   | 5.428828    |
| "Gm5620" | 7.198951967 | 6.51362133  | 7.116838867 | 6.700681    | 6.9657188   | 7.2111108   | 7.355110167 | 6.8099161   |
| "Gm5621" | 14.02051525 | 13.897904   | 14.1009995  | 13.770746   | 13.955192   | 13.9876505  | 14.2824215  | 13.8529385  |
| "Gm5633" | 7.2186847   | 8.071487    | 7.3359165   | 7.3968415   | 7.0272064   | 7.279419    | 7.525207    | 7.0505753   |
| "Gm568"  | 2.4334764   | 2.5511339   | 2.4898772   | 2.5852299   | 2.4925184   | 2.4333925   | 2.4740384   | 2.5773787   |
| "Gm5802" | 3.5476618   | 3.6703112   | 3.6403155   | 3.7973304   | 3.7331324   | 3.4089882   | 3.5380929   | 3.7183976   |
| "Gm5806" | 6.736889567 | 7.225459667 | 6.7242302   | 6.883348467 | 6.836638467 | 7.4170862   | 6.940582133 | 6.7023132   |
| "Gm5963" | 11.78314438 | 12.028127   | 11.77153575 | 11.81286243 | 11.82463575 | 11.70916893 | 11.9745195  | 11.89119525 |
| "Gm6109" | 2.81339705  | 3.02378715  | 2.860134    | 2.9994934   | 2.93224095  | 2.82811085  | 2.84980955  | 2.99033715  |
| "Gm6115" | 10.996671   | 11.579484   | 11.480651   | 11.374935   | 11.393887   | 11.400324   | 11.3294195  | 11.4030045  |
| "Gm6211" | 2.5119646   | 2.4764967   | 2.388196    | 2.448236    | 2.4013948   | 2.3894277   | 2.397064    | 2.5035474   |
| "Gm6238" | 12.203396   | 12.321184   | 12.524301   | 12.607135   | 12.243015   | 12.06431    | 12.554289   | 12.543699   |
| "Gm6293" | 10.64018967 | 10.64405667 | 10.96219933 | 11.221263   | 10.74361667 | 10.63157333 | 10.68109867 | 11.127151   |
| "Gm6334" | 10.274291   | 10.06639    | 10.24111675 | 10.464232   | 9.763523    | 9.6954255   | 10.8864355  | 10.45205    |
| "Gm6402" | 11.516104   | 11.686731   | 11.509033   | 11.37841    | 11.474197   | 11.392378   | 11.686869   | 11.349495   |
| "Gm6415" | 11.713745   | 11.686946   | 12.322159   | 12.477406   | 11.839762   | 11.538341   | 12.052282   | 12.2871065  |
| "Gm6484" | 3.6780608   | 2.731173    | 2.662998    | 2.7624497   | 2.6892962   | 2.6402142   | 3.359902    | 2.8057065   |
| "Gm6594" | 10.29468    | 9.443786    | 10.62693    | 10.579626   | 10.411985   | 10.190871   | 10.436459   | 10.6854515  |
| "Gm6607" | 3.670639    | 3.8716214   | 3.6766636   | 3.7785153   | 3.6329784   | 3.647603    | 4.233347    | 3.738478    |
| "Gm6747" | 9.816186133 | 10.2447242  | 10.1047308  | 10.0367359  | 10.05147    | 10.39770067 | 10.12854013 | 10.05985283 |
| "Gm6756" | 4.264268    | 4.455548    | 5.0649867   | 4.4149613   | 4.9802237   | 4.8187404   | 6.4469795   | 4.574061    |
| "Gm6787" | 2.3774905   | 2.4309311   | 2.3991977   | 2.53012895  | 2.3840323   | 2.3680988   | 2.40412005  | 2.49040375  |
| "Gm6793" | 11.288484   | 11.27097    | 10.636322   | 10.44733    | 10.848072   | 10.950741   | 10.559181   | 10.293633   |
| "Gm6988" | 13.668074   | 14.079271   | 13.727335   | 13.608086   | 13.727537   | 13.473488   | 13.822691   | 13.537446   |
| "Gm7008" | 3.0533488   | 3.1184688   | 3.0820854   | 3.248392    | 3.0825627   | 2.9535544   | 3.0814238   | 3.149884    |
| "Gm7040" | 2.555762    | 3.002467    | 2.626033    | 2.7699623   | 2.6318862   | 2.5848663   | 2.625114    | 2.745418    |
| "Gm7120" | 5.6244792   | 6.45060305  | 6.1994408   | 6.3801014   | 5.6481791   | 5.75720775  | 6.3365467   | 6.085903    |
| "Gm7226" | 8.519639    | 8.705753    | 8.668054    | 8.905387833 | 8.526584    | 8.292693667 | 8.861869433 | 8.990175667 |
| "Gm7285" | 13.15563    | 13.048112   | 12.90602    | 12.737178   | 12.849659   | 13.049041   | 13.407103   | 12.774508   |
| "Gm7511" | 7.51881     | 7.3132143   | 7.419384    | 7.6388965   | 7.43986     | 7.2657084   | 7.773641    | 7.574126    |
| "Gm7846" | 8.734693    | 8.888433    | 8.942305    | 9.264768    | 8.945669    | 8.480593    | 9.041698    | 9.28429     |
| "Gm8069" | 9.818869    | 9.485819    | 9.8041935   | 9.957545    | 9.887239    | 9.330158    | 10.141274   | 9.8496475   |
| "Gm8096" | 3.2182546   | 3.434272    | 3.5926812   | 3.396267    | 3.8297448   | 3.3764703   | 4.9445424   | 3.471595    |
| "Gm8203" | 9.8553125   | 9.705449    | 10.693643   | 10.998335   | 10.2597425  | 9.925163    | 10.763105   | 11.0104425  |
| "Gm8430" | 13.660883   | 13.596021   | 13.73781    | 13.563063   | 13.608738   | 13.716341   | 13.829981   | 13.535493   |
| "Gm8465" | 3.5341344   | 3.6064057   | 4.1089525   | 3.9065356   | 3.5533352   | 3.4703045   | 3.6189384   | 4.270534    |
| "Gm8479" | 2.4440243   | 2.552632    | 2.10512827  | 2.6157029   | 2.5031362   | 2.467613    | 2.4999127   | 2.5931013   |
| "Gm8539" | 4.6398734   | 4.6779023   | 4.710950433 | 4.8091002   | 4.632676933 | 4.556483267 | 4.903532733 | 4.711937833 |
| "Gm8615" | 7.2954063   | 6.6820545   | 7.4312367   | 7.5168996   | 7.626185    | 7.390793    | 7.706911    | 7.6211915   |
| "Gm8801" | 4.3737384   | 5.165044    | 5.1552074   | 4.92607985  | 5.04509415  | 5.7822472   | 5.4318831   | 5.02094275  |
| "Gm8942" | 13.234962   | 13.164295   | 13.122282   | 12.980954   | 13.091442   | 13.176348   | 13.364678   | 13.286885   |
| "Gm9222" | 6.8125343   | 7.726533    | 7.908195    | 7.0531163   | 6.596178    | 6.8870234   | 6.942858    | 6.9418325   |
| "Gm9706" | 3.7658486   | 3.7471776   | 3.8019341   | 3.76017845  | 3.54402555  | 3.69700945  | 4.59619165  | 4.0592788   |
| "Gm9748" | 2.5263207   | 2.6094596   | 2.5545757   | 2.6452768   | 2.567708    | 2.5225189   | 2.5696702   | 2.6562316   |
| "Gm9757" | 4.2044888   | 7.857172    | 2.3467264   | 2.5459158   | 4.146351    | 6.882973    | 2.4049535   | 2.5322204   |
| "Gm9769" | 11.15107    | 11.03242125 | 11.013621   | 10.9589135  | 11.139869   | 11.487597   | 11.192443   | 11.0075505  |
| "Gm9798" | 3.8179424   | 3.819033    | 3.8284855   | 3.882627    | 3.838812    | 3.8086996   | 3.8251283   | 3.8521035   |
| "Gm9817" | 2.498030333 | 2.4397046   | 2.1626988   | 2.032676567 | 2.1847718   | 2.646172367 | 2.1960507   | 2.044525733 |
| "Gm9835" | 5.3496194   | 4.36031665  | 4.8773029   | 4.3373296   | 5.2263525   | 6.3791855   | 5.2862355   | 4.6319255   |
| "Gm9840" | 8.2253887   | 8.491623825 | 8.563525925 | 8.43338105  | 8.236277375 | 8.177611025 | 8.54283965  | 8.3581267   |
| "Gm9846" | 13.984358   | 14.397671   | 13.936218   | 13.797315   | 14.131304   | 14.272095   | 14.495571   | 13.968324   |
| "Gm9861" | 2.447911    | 2.5154188   | 2.4842002   | 2.556142    | 2.5463738   | 2.461417    | 2.497255    | 2.9302208   |
| "Gm9905" | 2.557671    | 2.6174307   | 2.634442    | 2.7098176   | 2.6064453   | 2.560046    | 2.5916157   | 2.697685    |
| "Gm9923" | 6.4016348   | 6.94106505  | 6.6537536   | 6.9281039   | 6.6555638   | 6.4741007   | 6.6718674   | 6.87675775  |
| "Gm9983" | 7.2165847   | 7.4437914   | 8.024677    | 8.270127    | 7.4045506   | 7.0610867   | 7.976314    | 7.996757    |
| "Gmcl1"  | 3.346591475 | 2.95759385  | 3.5096905   | 3.45951195  | 3.35662855  | 3.67397125  | 4.04618295  | 3.495186025 |
| "Gmeb1"  | 3.83552495  | 4.113889    | 3.9137643   | 3.97542875  | 3.80399405  | 4.3628395   | 3.9431325   | 3.92224145  |
| "Gmfb"   | 6.8410042   | 6.899651175 | 6.808364875 | 6.81233235  | 7.15930375  | 6.7536258   | 7.20901635  | 6.9987728   |
| "Gmip"   | 3.00018     | 3.0397224   | 2.9954267   | 3.0978305   | 3.09874     | 3.3856175   | 3.0556264   | 3.08666     |
| "Gmnn"   | 6.7420926   | 6.026192    | 5.5262723   | 6.816042    | 6.716073    | 6.103276    | 6.483618    | 6.9717145   |
| "Gmppa"  | 5.51430442  | 5.91511196  | 6.07410912  | 6.11968562  | 5.832742    | 5.519003    | 5.87551366  | 5.91361804  |
| "Gmppb"  | 3.9111369   | 3.3150709   | 4.2401943   | 4.770575    | 4.0422783   | 3.626411    | 4.2573586   | 4.104291    |
| "Gmpr"   | 9.72691     | 10.303007   | 11.183787   | 10.9684105  | 10.5788765  | 9.410877    | 10.49312    | 10.924934   |
| "Gmpr2"  | 4.5984564   | 4.6739573   | 5.1128983   | 4.620146    | 5.203086    | 5.134231    | 5.3255987   | 4.739863    |
| "Gna11"  | 7.65071535  | 7.6700935   | 7.5726647   | 7.746955    | 7.79699     | 8.0013835   | 7.866772    | 7.7562383   |
| "Gna12"  | 3.741673067 | 3.6348444   | 3.856781133 | 3.8290462   | 3.7492675   | 3.746673667 | 3.804868167 | 3.820118133 |
| "Gna13"  | 7.1215995   | 6.63781345  | 5.680174433 | 5.617526233 | 6.124114883 | 6.181581667 | 6.198760283 | 5.7853003   |
| "Gna14"  | 2.3791245   | 2.83872225  | 2.423349    | 2.5338359   | 2.4257546   | 2.3627902   | 2.4162046   | 2.4943489   |
| "Gnai1"  | 4.669807033 | 5.0595746   | 6.786597367 | 4.993675    | 7.599669833 | 6.736818967 | 6.861076333 | 5.889598667 |
| "Gnai2"  | 8.1239435   | 7.5720573   | 8.56798     | 8.472677    | 8.1256475   | 8.4219675   | 8.683667    | 8.49803725  |
| "Gnai3"  | 5.92380275  | 6.05468585  | 6.01898485  | 5.7426317   | 5.9239844   | 6.20337555  | 5.947061    | 5.8368477   |
| "Gnao1"  | 2.7535012   | 2.826428167 | 2.817005467 | 2.876178133 | 2.807703233 | 2.739504333 | 2.800452167 | 2.93589567  |
| "Gnas"   | 7.1092879   | 7.161761867 | 7.105562033 | 7.060239533 | 6.957733167 | 7.029834433 | 7.102841733 | 6.996769533 |
| "Gnat2"  | 2.2666554   | 2.3289635   | 2.2917972   | 2.5125165   | 2.3048954   | 2.2908351   | 2.2834601   | 2.370388    |
| "Gnaz"   | 2.333087    | 2.4004803   | 2.3590355   | 2.4302418   | 2.410505    | 2.3261957   | 2.355514    | 2.4298751   |
| "Gnb1"   | 5.5946854   | 5.0874219   | 5.7936541   | 5.576889233 | 5.7290383   | 5.917240367 | 5.9625615   | 5.684253    |
| "Gnb1l"  | 2.429182    | 2.4262204   | 2.5966187   | 2.3288689   | 2.3731065   | 2.2844927   | 2.6631742   | 2.637711    |
| "Gnb2"   | 9.604922    | 9.563107    | 9.898413    | 9.491356    | 9.74924     | 9.920599    | 9.908365    | 9.529477    |

|              |             |             |             |             |             |             |             |             |
|--------------|-------------|-------------|-------------|-------------|-------------|-------------|-------------|-------------|
| "Gnb2l1"     | 12.896439   | 13.203946   | 12.90878    | 12.651961   | 12.831307   | 13.043449   | 13.310412   | 12.69108    |
| "Gnb3"       | 2.4440277   | 2.4886718   | 2.473698    | 2.5579858   | 2.4715827   | 2.4398122   | 2.4613495   | 2.5757794   |
| "Gnb4"       | 3.8530481   | 3.91478635  | 4.719238    | 4.47435365  | 4.2927662   | 4.46289635  | 4.4290235   | 4.434987    |
| "Gnb5"       | 4.8373284   | 4.513159    | 6.0310593   | 6.0720334   | 5.599782    | 4.9282084   | 6.364677    | 5.743252    |
| "Gne"        | 6.2678795   | 2.9692416   | 3.271817    | 3.7923021   | 4.306106    | 4.4085126   | 4.388513    | 4.1715837   |
| "Gng10"      | 7.3879747   | 6.992919    | 8.109692    | 7.8127084   | 7.653128    | 7.749583    | 7.616533    | 7.806815    |
| "Gng11"      | 8.643827    | 8.17118     | 9.524999    | 9.370609    | 8.692404    | 8.725765    | 9.054249    | 9.467555    |
| "Gng12"      | 6.8907463   | 5.8666265   | 6.6297155   | 5.9228632   | 6.7297879   | 6.8957517   | 7.3066635   | 6.02907155  |
| "Gng13"      | 2.305295    | 2.4034371   | 2.3685472   | 2.451462    | 2.3474724   | 2.3258443   | 2.3422937   | 2.4291916   |
| "Gng2"       | 4.311018    | 3.776044    | 4.331572    | 4.34431     | 4.3315024   | 4.6845098   | 5.5290565   | 4.3087287   |
| "Gngt1"      | 2.963422075 | 3.18642845  | 3.04903635  | 3.25375105  | 3.041340025 | 3.02719305  | 3.030894325 | 3.1680442   |
| "Gnl1"       | 4.70396725  | 4.82543915  | 4.799833    | 4.83733965  | 4.89330985  | 4.7771299   | 4.84540555  | 4.613745    |
| "Gnl2"       | 7.298454867 | 8.405681333 | 7.097219667 | 7.307787    | 7.5673656   | 7.9484542   | 7.209055967 | 7.414664133 |
| "Gnl3"       | 9.947856    | 10.838947   | 9.149512    | 9.4984865   | 10.054883   | 10.901401   | 9.0390835   | 9.263744    |
| "Gnmt"       | 11.374454   | 4.8728547   | 4.6921077   | 2.735252    | 6.646552    | 5.0305214   | 3.8573117   | 3.953122    |
| "Gnpat"      | 8.915289    | 9.272995    | 9.072809    | 9.534537    | 8.921227    | 8.684659    | 9.319556    | 9.417299    |
| "Gnpda1"     | 3.5276172   | 3.3476052   | 3.5478308   | 3.591197    | 3.535558    | 3.8997447   | 3.9222949   | 3.4058454   |
| "Gnpda2"     | 4.58253375  | 4.8632563   | 6.0118908   | 5.939107    | 5.8510714   | 5.5095053   | 6.1982436   | 6.17735145  |
| "Gnpnat1"    | 6.621686167 | 5.4844262   | 6.4975385   | 6.542589    | 5.845137733 | 6.361920867 | 6.224192333 | 6.520302167 |
| "Gnptab"     | 4.205770033 | 4.454858133 | 4.4818496   | 4.889172033 | 4.529407367 | 4.090067533 | 4.5942503   | 4.5328921   |
| "Gnrhr"      | 2.42952665  | 2.5276939   | 2.4802196   | 2.580179    | 2.49497915  | 2.4743509   | 2.48036965  | 2.56811345  |
| "Gns"        | 9.8386505   | 9.118525    | 9.393878    | 9.0245415   | 9.77719625  | 9.894697    | 9.510208    | 9.330342    |
| "Golga2"     | 8.339863    | 8.852936    | 8.843156    | 8.711564    | 8.678116    | 8.537732    | 8.681254    | 8.7634115   |
| "Golga3"     | 4.8758211   | 5.3029474   | 4.84827315  | 5.0796075   | 5.0618985   | 4.9719026   | 5.05181325  | 5.02480725  |
| "Golga4"     | 10.41462167 | 11.00806533 | 10.54431383 | 10.84245833 | 10.506532   | 10.57260633 | 10.52110967 | 10.87057667 |
| "Golga5"     | 9.085878    | 10.019397   | 8.83708     | 9.030167    | 9.247108    | 9.436764    | 8.973288    | 8.91674     |
| "Golga7"     | 9.730709    | 9.737811    | 9.830311    | 9.72633     | 9.713667    | 9.84613     | 9.545029    | 9.710754    |
| "Golima4"    | 7.875946    | 5.6780357   | 8.424374    | 7.741332    | 7.3187637   | 6.7718043   | 7.432952    | 8.025002    |
| "Golm1"      | 6.2514095   | 6.9380097   | 7.525667    | 8.25767     | 6.016564    | 7.2560425   | 6.451722    | 7.2384524   |
| "Golp3"      | 6.99644215  | 6.799099125 | 7.019461775 | 7.70934175  | 6.7752175   | 6.826026175 | 6.929353625 | 7.309576975 |
| "Golp3l"     | 5.8291264   | 6.0237575   | 5.88816     | 6.0818644   | 5.900609    | 5.9257174   | 5.8941073   | 6.0333514   |
| "Golt1a"     | 3.2612276   | 2.2658012   | 2.2503853   | 2.3330855   | 2.2501411   | 2.2246559   | 2.2447748   | 2.301607    |
| "Golt1b"     | 4.01103445  | 3.80946425  | 4.442482    | 4.7926239   | 3.8837179   | 3.863441    | 4.7565283   | 4.53356835  |
| "Gon4l"      | 5.1845317   | 5.6198173   | 4.9903736   | 4.760132    | 5.5612593   | 5.8251815   | 5.180866    | 5.1251903   |
| "Gopc"       | 3.963001    | 3.937814    | 4.06447775  | 4.08030125  | 4.2025237   | 4.21329915  | 4.1373958   | 4.38032755  |
| "Goraspl1"   | 4.127377    | 4.1457192   | 3.8730705   | 4.1437388   | 4.147478    | 4.0033095   | 3.9838635   | 4.0786091   |
| "Goraspl2"   | 6.50572415  | 6.9555709   | 6.5067294   | 6.61723235  | 6.57977475  | 6.41440065  | 6.41518395  | 6.4636575   |
| "Gosr1"      | 6.5786442   | 7.3918225   | 5.56330755  | 5.46901185  | 6.5438765   | 7.036885    | 5.27601315  | 5.50589585  |
| "Gosr2"      | 7.2639888   | 7.04720375  | 6.8986036   | 7.06755265  | 6.876585    | 6.99938375  | 7.51035965  | 6.28489285  |
| "Got1"       | 13.277546   | 12.463995   | 11.594949   | 11.781442   | 12.545595   | 12.718324   | 11.402047   | 12.126484   |
| "Got2"       | 10.410389   | 9.697365    | 10.0494785  | 10.2974465  | 10.2824015  | 9.788568    | 10.16685    | 10.2873925  |
| "Gp1bb"      | 2.39731155  | 2.506983    | 2.4720118   | 2.5387015   | 2.4461361   | 2.44680645  | 2.4323164   | 2.51103755  |
| "Gp49a"      | 8.30676     | 5.1256657   | 7.077066    | 6.225183    | 7.2678914   | 7.34014     | 8.210264    | 6.3975625   |
| "Gpaa1"      | 3.05707415  | 3.62366895  | 3.69663845  | 3.7497252   | 3.60859465  | 3.39283065  | 3.68518435  | 3.67850705  |
| "Gpam"       | 6.1912008   | 6.60408185  | 7.2031487   | 7.35703925  | 6.95995485  | 6.67951845  | 6.91890855  | 7.19695965  |
| "Gpamk1"     | 3.242702    | 3.4330033   | 3.121731    | 3.37252095  | 3.3062689   | 3.33490585  | 3.0262526   | 3.3380971   |
| "Gpatch1"    | 6.6707473   | 7.9557524   | 6.710196    | 6.837801    | 6.8741117   | 8.54719     | 6.727529    | 6.85466     |
| "Gpatch2"    | 2.8921382   | 2.9679272   | 2.9277222   | 3.0597508   | 3.0169578   | 2.870227    | 2.9238048   | 3.0116944   |
| "Gpatch4"    | 6.813810233 | 7.385654333 | 6.858656133 | 7.146601667 | 6.389843567 | 6.457582533 | 7.274754133 | 7.030565833 |
| "Gpatch8"    | 5.615423033 | 6.8956588   | 5.991578667 | 6.141382267 | 6.315441933 | 6.4220779   | 5.603332467 | 6.022487    |
| "Gbbp1"      | 9.96598     | 10.145089   | 10.073284   | 10.084543   | 10.119686   | 10.141919   | 10.08329    | 10.114445   |
| "Gbbp1l1"    | 6.8080344   | 7.5005527   | 7.2042184   | 7.333553    | 6.970926    | 7.284417    | 7.032653    | 7.3091793   |
| "Gpc1"       | 10.082324   | 10.364307   | 10.399975   | 10.74142    | 10.070447   | 9.527277    | 10.396131   | 10.230148   |
| "Gpc3"       | 5.3061123   | 5.0100093   | 6.236604    | 5.060079    | 6.9710445   | 5.345813    | 6.528569    | 5.760723    |
| "Gpc4"       | 6.8722587   | 5.78873     | 6.9828787   | 6.7993555   | 6.4891634   | 5.6105585   | 7.1044903   | 6.5517015   |
| "Gpc6"       | 2.6071682   | 2.672522    | 2.6324675   | 2.7140923   | 2.6339116   | 2.603302    | 2.6301928   | 2.6658995   |
| "Gpcpd1"     | 12.08611    | 11.887903   | 12.096933   | 12.017526   | 12.016271   | 12.148093   | 11.3190975  | 12.193151   |
| "Gpd1"       | 6.7092363   | 7.5911034   | 7.709942333 | 7.762498133 | 7.1940127   | 7.008797133 | 7.5454042   | 7.555351567 |
| "Gpd2"       | 8.228018    | 8.32281     | 10.584269   | 10.495655   | 9.025236    | 8.407136    | 10.020317   | 9.998356    |
| "Gphn"       | 8.1501095   | 8.4899985   | 8.3116905   | 8.3633065   | 8.26524925  | 8.1298528   | 8.2690117   | 8.31519     |
| "Gpi1"       | 12.04089633 | 12.937493   | 12.423547   | 12.54515283 | 12.37160767 | 12.60146167 | 12.476552   | 12.369199   |
| "Gpld1"      | 6.978179    | 2.2376451   | 2.236956    | 2.3043      | 2.2461855   | 2.176842    | 2.2542436   | 2.271043    |
| "Gpm6a"      | 4.36307375  | 3.94253085  | 3.7632325   | 3.4270199   | 4.23767535  | 3.87450185  | 3.96118635  | 3.60209885  |
| "Gpm6b"      | 5.88349735  | 5.617636    | 6.1571116   | 5.5794743   | 6.186419    | 5.23765865  | 6.5845675   | 5.89522715  |
| "Gpn1"       | 7.325353    | 7.486374    | 7.5811005   | 7.5804133   | 6.973265    | 7.0939975   | 7.5388546   | 7.557738    |
| "Gpn2"       | 6.2941456   | 6.3872223   | 5.707482    | 5.9403653   | 5.9942102   | 5.888536    | 5.88845     | 5.7407203   |
| "Gpn3"       | 6.376686    | 6.86872     | 6.6530538   | 6.690627    | 6.8051906   | 6.48749     | 6.544219    | 6.9357934   |
| "Gpnmb"      | 7.312413    | 5.989659    | 5.5555367   | 4.9677095   | 6.4746623   | 6.5362263   | 6.840362    | 4.8967195   |
| "Gpr108"     | 5.866928    | 5.886595    | 5.688879    | 5.5606346   | 6.1149516   | 5.964197    | 6.444631    | 5.8678074   |
| "Gpr110"     | 2.509925    | 2.6094556   | 2.5422535   | 2.6771584   | 2.550581    | 2.5082173   | 2.542427    | 2.644703    |
| "Gpr124"     | 2.3671036   | 2.3786118   | 2.391696    | 2.5128007   | 2.394421    | 2.372464    | 2.4035397   | 2.462726    |
| "Gpr125"     | 6.267196    | 5.821568    | 7.382041    | 6.9624596   | 6.4724464   | 6.0512757   | 7.002114    | 6.9831924   |
| "Gpr133"     | 5.2592635   | 4.834707    | 6.080166    | 5.3111634   | 5.6349525   | 6.5636077   | 4.696371    | 5.4996696   |
| "Gpr137b-ps" | 6.5202904   | 6.0754676   | 7.011126    | 6.3304896   | 6.7856603   | 6.860531    | 6.8461833   | 6.79388     |
| "Gpr137b"    | 3.655452217 | 3.564070083 | 3.781578433 | 3.776233767 | 3.890531733 | 3.829585    | 3.8391578   | 3.887805183 |
| "Gpr146"     | 4.79392175  | 5.0160967   | 4.89509545  | 4.92727935  | 4.80813005  | 4.77382705  | 4.58207865  | 4.79013095  |
| "Gpr153"     | 2.5243683   | 2.038998    | 2.9063218   | 2.8946595   | 2.5309591   | 2.3907273   | 2.5525236   | 3.0451975   |
| "Gpr155"     | 6.976367    | 6.7318754   | 8.570898    | 8.434888    | 7.083013    | 5.737475    | 7.490634    | 7.7697377   |
| "Gpr180"     | 8.481267    | 8.336094    | 9.244212    | 9.244886    | 8.317704    | 7.927345    | 8.960502    | 8.806088    |
| "Gpr182"     | 2.0869007   | 2.1021497   | 2.0490532   | 2.1431751   | 2.0928304   | 2.8451316   | 2.071158    | 2.128549    |
| "Gpr19"      | 4.342927    | 4.721873    | 4.099003    | 4.096989    | 5.176733    | 4.0471544   | 3.783977    | 4.138192    |

|           |             |             |             |             |             |             |             |             |
|-----------|-------------|-------------|-------------|-------------|-------------|-------------|-------------|-------------|
| "Gpr3"    | 3.3597326   | 3.606321    | 3.3873446   | 3.4550297   | 3.389239    | 3.2502763   | 3.3845036   | 3.4423075   |
| "Gpr33"   | 2.5691478   | 3.3287592   | 2.6034043   | 2.715717    | 2.604027    | 2.566871    | 2.602025    | 2.6550868   |
| "Gpr34"   | 2.5885332   | 2.7557259   | 2.9586706   | 2.836491    | 2.6971786   | 2.6393683   | 2.8402839   | 2.8675203   |
| "Gpr37"   | 2.6602356   | 2.7233891   | 2.6860354   | 2.7790966   | 2.6946113   | 2.6560585   | 2.682733    | 2.7696126   |
| "Gpr56"   | 4.4939425   | 4.8438913   | 4.3178346   | 4.6744825   | 4.6497942   | 4.7590339   | 4.5437627   | 4.66429575  |
| "Gpr65"   | 3.742198    | 3.4858801   | 3.3731065   | 3.5381255   | 3.3952951   | 4.767501    | 3.5511131   | 3.5144124   |
| "Gpr85"   | 2.772711167 | 2.9409924   | 2.8343788   | 2.971124233 | 2.838812167 | 2.784469767 | 2.8433498   | 2.949554267 |
| "Gpr88"   | 3.3406453   | 3.662463    | 3.509681    | 3.720496    | 3.5884116   | 3.3522866   | 3.4724069   | 3.611874    |
| "Gpr89"   | 7.0094423   | 6.2140646   | 6.263876    | 5.935289    | 6.578067    | 6.16521     | 7.331367    | 6.2233505   |
| "Gpr98"   | 2.52542175  | 2.63018345  | 2.55342475  | 2.65679405  | 2.5610761   | 2.5088848   | 2.55482625  | 2.65678735  |
| "Gprasp1" | 6.6306357   | 7.178657    | 7.4001775   | 7.3069324   | 6.9470825   | 7.36355     | 7.5654836   | 7.5530405   |
| "Gprc5b"  | 5.34394715  | 4.9131742   | 5.6559196   | 5.3451858   | 5.94959335  | 5.3035085   | 6.1890531   | 5.7182595   |
| "Gprc5c"  | 5.7863393   | 5.6647215   | 7.3694944   | 7.81997     | 6.035852    | 5.105437    | 6.8378267   | 7.4764786   |
| "Gprin1"  | 2.5148182   | 2.7605247   | 2.609479    | 2.7663457   | 2.6239862   | 2.5908346   | 2.605476    | 2.6746273   |
| "Gps1"    | 9.031136    | 9.252676    | 9.349909    | 9.2348      | 9.057959    | 8.818148    | 9.307369    | 9.260475    |
| "Gps2"    | 5.5874844   | 6.261306    | 5.554084    | 5.5144463   | 5.5444536   | 5.5211596   | 6.011277    | 5.409684    |
| "Gpsm1"   | 3.613632733 | 3.550970467 | 3.890306467 | 3.739754767 | 3.655760333 | 3.589557633 | 3.615143    | 4.148390067 |
| "Gpsm2"   | 3.4645503   | 2.368044    | 4.0280766   | 3.8584325   | 3.5650866   | 3.4915874   | 3.5580814   | 3.6082087   |
| "Gpsm3"   | 2.6454298   | 2.6617844   | 2.5847845   | 2.6987603   | 2.6364188   | 3.980894    | 3.4172812   | 2.719109    |
| "Gpt"     | 8.195909    | 6.744395    | 7.5571504   | 7.2277083   | 7.7469883   | 7.0163136   | 8.063462    | 7.4208035   |
| "Gpt2"    | 11.89045983 | 12.7139445  | 10.6445775  | 11.268698   | 11.46660333 | 12.05393333 | 10.40926333 | 10.85261617 |
| "Gpx1"    | 13.14182    | 10.993355   | 11.614807   | 11.349601   | 12.068858   | 12.857705   | 11.665203   | 11.380774   |
| "Gpx2"    | 2.8676517   | 2.9395306   | 2.9302309   | 2.995201    | 3.0159543   | 2.68476     | 2.9257145   | 3.314144    |
| "Gpx3"    | 9.602168    | 10.13282    | 10.480674   | 9.629809    | 11.349118   | 11.082955   | 10.746239   | 10.418874   |
| "Gpx4"    | 12.5033925  | 12.139982   | 12.313894   | 12.308522   | 12.314054   | 11.8692945  | 12.9508565  | 12.1466945  |
| "Gpx7"    | 6.2643056   | 6.7262654   | 7.9084597   | 7.0310044   | 6.89105     | 6.5368657   | 7.223414    | 6.729862    |
| "Gpx8"    | 6.731286    | 6.0484023   | 7.8148932   | 7.072374    | 7.1531463   | 6.6277366   | 8.684973    | 7.490846    |
| "Gramd1a" | 6.917702    | 7.0706916   | 6.6952477   | 6.824621    | 7.466072    | 7.121872    | 7.4946346   | 7.0562925   |
| "Gramd3"  | 4.75139985  | 4.8852818   | 4.6307217   | 4.52254325  | 4.8049046   | 5.05128035  | 4.6546714   | 4.53731965  |
| "Gramd4"  | 7.011652    | 6.929101    | 6.7678      | 6.2572975   | 5.9077735   | 7.10314     | 6.618647    | 6.6365447   |
| "Grap2"   | 3.4636445   | 3.5838065   | 3.5016026   | 3.5628226   | 3.5312276   | 3.479448    | 3.500691    | 3.559327    |
| "Grasp"   | 4.1936297   | 3.9804296   | 3.924898    | 3.9960084   | 3.5909877   | 4.546273    | 4.517601    | 3.9884105   |
| "Grb10"   | 7.07180125  | 6.598325    | 7.598353    | 6.64522745  | 7.176725    | 6.84872675  | 7.3180265   | 6.8500058   |
| "Grb14"   | 7.1270924   | 5.0957937   | 7.823739    | 8.077598    | 7.707215    | 6.425502    | 6.992356    | 8.11477     |
| "Grb2"    | 6.7508712   | 6.3822675   | 6.8233583   | 6.7624925   | 6.51575275  | 6.93368575  | 7.374002    | 6.8629544   |
| "Grb7"    | 2.682808    | 2.1453397   | 2.1309674   | 2.1920335   | 2.130002    | 2.1119516   | 2.1288707   | 2.1917162   |
| "Grcc10"  | 6.6838573   | 6.6308228   | 6.5625238   | 6.66366015  | 6.6334655   | 6.5508065   | 6.95269785  | 6.6024459   |
| "Greb1"   | 2.835821    | 3.0019388   | 2.320103    | 2.4618752   | 2.3783853   | 3.54579     | 2.3186727   | 2.4077652   |
| "Grem1"   | 3.0602791   | 3.3216302   | 3.1130924   | 3.257416    | 3.1608396   | 3.4152436   | 3.155808    | 3.2570615   |
| "Grem2"   | 4.0459795   | 3.908927    | 6.009597    | 4.7221537   | 3.9817986   | 3.8299227   | 6.5391283   | 5.146892    |
| "Grhl1"   | 2.3202899   | 2.4537494   | 3.9284194   | 2.3710666   | 2.3175235   | 3.0380898   | 2.3019679   | 2.3724709   |
| "Grhl2"   | 2.380930167 | 2.491441467 | 2.403984567 | 2.479571267 | 2.4063152   | 2.3852543   | 2.401229    | 2.469327533 |
| "Grhpr"   | 8.699696    | 7.6963515   | 8.156105    | 8.12047     | 7.943197    | 7.8252234   | 8.450003    | 7.9885383   |
| "Gria1"   | 2.3178668   | 2.3833203   | 2.345492    | 2.468849    | 2.3478694   | 2.306454    | 2.343926    | 2.4292207   |
| "Gria2"   | 2.66734055  | 2.9103775   | 2.7244521   | 2.88025095  | 2.7273028   | 2.67058505  | 2.71999185  | 2.8324597   |
| "Gria3"   | 3.0357077   | 3.301686    | 3.5688736   | 3.3684294   | 3.4425726   | 3.1410189   | 3.2584276   | 3.3502843   |
| "Grid2ip" | 2.6591272   | 3.0335538   | 2.8695972   | 2.7568293   | 2.6296437   | 2.689014    | 2.6868045   | 2.6946273   |
| "Grik1"   | 3.0250974   | 3.3107908   | 3.1543567   | 3.2476156   | 3.1600974   | 3.1291494   | 3.09732     | 3.2205591   |
| "Grin2b"  | 2.3939116   | 2.6448264   | 2.4090557   | 2.4688528   | 2.4092417   | 2.3880444   | 2.4081402   | 2.4693375   |
| "Grin3b"  | 2.505282    | 2.6240313   | 2.5574493   | 2.6552563   | 2.5652785   | 2.5338063   | 2.5575595   | 2.6330369   |
| "Grina"   | 9.697107    | 9.5627435   | 9.3341695   | 9.485529    | 9.664883    | 9.733108    | 10.0724495  | 9.324707    |
| "Grip1"   | 2.7196217   | 2.9353745   | 2.8222644   | 2.9508366   | 2.82906415  | 2.759766    | 2.8173559   | 2.92073835  |
| "Gripap1" | 5.8082895   | 6.0298333   | 6.0748167   | 6.108943    | 6.0508103   | 6.1450653   | 5.9789686   | 5.8690543   |
| "Grk1"    | 2.2229774   | 2.3064141   | 2.242266    | 2.427149    | 2.2387116   | 2.2234156   | 2.2394102   | 2.3351505   |
| "Grk4"    | 2.7556617   | 3.0570263   | 2.787726    | 2.91432555  | 2.79543265  | 2.7601371   | 2.81505095  | 2.88061165  |
| "Grk5"    | 4.8511267   | 4.968173    | 5.241068    | 4.871461    | 5.1478653   | 5.9699802   | 5.0700855   | 5.12414     |
| "Grk6"    | 3.03649935  | 3.3659093   | 3.3680118   | 3.4090843   | 3.20941785  | 3.85359515  | 3.35017365  | 3.3551459   |
| "Grif1"   | 7.794781    | 8.448507    | 5.6579313   | 6.30082     | 7.2681265   | 7.1208982   | 7.555297    | 6.503967    |
| "Grm1"    | 3.000425    | 3.0567112   | 3.0391288   | 3.1046393   | 3.038009    | 3.0167017   | 3.038505    | 3.1057112   |
| "Grm8"    | 2.5776556   | 2.7048638   | 2.6350427   | 2.7825935   | 2.6671174   | 2.5652251   | 2.6665976   | 2.7805285   |
| "Grn"     | 10.65695733 | 8.924378333 | 9.765870667 | 8.644813    | 10.30100517 | 10.539918   | 10.05070117 | 9.060984    |
| "Grpel1"  | 10.141625   | 10.394822   | 9.75157     | 9.9204      | 10.266205   | 10.393686   | 10.148955   | 9.806239    |
| "Grpel2"  | 7.602961    | 7.8756065   | 7.5382986   | 7.885018    | 7.6483335   | 7.4098535   | 7.46795     | 7.4400554   |
| "Grpr"    | 2.569247    | 2.7072892   | 2.624991    | 2.786622    | 2.6409526   | 2.5842402   | 2.6262312   | 2.746129    |
| "Grsf1"   | 10.57320533 | 10.6118695  | 10.81856733 | 11.302647   | 10.93166633 | 10.40069667 | 10.809181   | 11.55750717 |
| "Grtp1"   | 3.83535695  | 3.24411115  | 4.17736925  | 4.1300559   | 3.7139578   | 3.32377455  | 3.9992693   | 4.0965384   |
| "Grwd1"   | 6.4539101   | 7.300133333 | 6.163641467 | 6.394615    | 6.3690711   | 6.417302333 | 6.272881667 | 6.213536533 |
| "Gsc"     | 2.1174      | 2.1974173   | 2.4540715   | 2.247664    | 2.1721616   | 2.114654    | 2.1856644   | 2.2432637   |
| "Gsdma"   | 2.7968628   | 2.8744702   | 2.7906497   | 2.9450505   | 2.8021765   | 2.7229202   | 2.8011985   | 2.9156597   |
| "Gsdmc"   | 2.5451584   | 2.6788483   | 2.5696468   | 2.6457222   | 2.5885305   | 2.5383415   | 2.552673    | 2.6079845   |
| "Gsg1"    | 2.5008748   | 2.5548441   | 2.521949    | 2.521949    | 2.5288885   | 2.4837418   | 2.5210457   | 2.6027305   |
| "Gsk3a"   | 9.839076    | 10.168783   | 10.181003   | 10.223315   | 10.135881   | 10.1249695  | 10.13623    | 10.18754    |
| "Gsk3b"   | 7.566964    | 9.249798    | 7.0005474   | 7.6421084   | 8.144121    | 8.559063    | 6.633385    | 7.491925    |
| "Gsn"     | 11.03811682 | 11.2115357  | 11.85897184 | 11.7532315  | 12.02735502 | 11.99955704 | 11.61994788 | 11.72909906 |
| "Gspt1"   | 6.933624933 | 7.023384467 | 7.101862767 | 7.212384767 | 7.1276198   | 6.987544167 | 7.1162826   | 7.1261332   |
| "Gspt2"   | 2.274526    | 2.3512256   | 2.3591974   | 2.4113777   | 2.4894204   | 2.3396213   | 2.3339217   | 2.4069774   |
| "Gsr"     | 7.5756035   | 6.99692895  | 6.5893347   | 6.67304125  | 6.6414517   | 7.87625375  | 6.84914425  | 6.6440947   |
| "Gss"     | 2.9958782   | 2.4602005   | 2.2209466   | 2.5222719   | 2.4727888   | 2.4090414   | 2.4571302   | 2.53093     |
| "Gsta2"   | 6.631053    | 2.7475014   | 2.7301855   | 2.7993898   | 2.6593652   | 2.5850935   | 2.680016    | 2.7716174   |
| "Gsta3"   | 8.0844045   | 3.16811765  | 3.36233575  | 3.094124    | 3.3704594   | 3.0257158   | 4.3847527   | 3.1792555   |
| "Gsta4"   | 7.502604    | 6.4632826   | 7.5609016   | 7.4993124   | 7.273792    | 5.5980144   | 7.7402716   | 7.385316    |

|                 |             |             |             |             |             |             |             |             |
|-----------------|-------------|-------------|-------------|-------------|-------------|-------------|-------------|-------------|
| "Gstk1"         | 9.831422    | 9.822777    | 10.155619   | 9.985428    | 10.014129   | 9.299546    | 10.105676   | 9.949587    |
| "Gstm1"         | 9.045488833 | 7.4369187   | 7.468845867 | 7.176774367 | 7.469932    | 7.212877733 | 7.484914533 | 7.294285    |
| "Gstm2"         | 9.975334    | 10.013184   | 9.880934    | 8.959988    | 9.676964    | 9.357939    | 10.386072   | 9.507471    |
| "Gstm3"         | 5.0592494   | 2.3478954   | 2.501968    | 2.388303    | 2.3625169   | 2.3121686   | 2.3449523   | 2.3869216   |
| "Gstm4"         | 5.866184    | 6.081742    | 6.557556    | 6.138197    | 5.975544    | 5.432992    | 6.5497365   | 5.873114    |
| "Gstm5"         | 11.263951   | 11.822375   | 11.560491   | 11.650878   | 11.244097   | 11.129447   | 11.858587   | 11.556848   |
| "Gstm6"         | 2.4965754   | 2.2287378   | 2.2205582   | 2.2756274   | 2.2188234   | 2.1983347   | 2.219888    | 2.2766035   |
| "Gstm7"         | 2.3913167   | 2.3474889   | 2.2847416   | 2.3764186   | 2.3497381   | 2.2903173   | 2.3451192   | 2.3873649   |
| "Gsto1"         | 10.08313025 | 9.565075    | 9.323247    | 10.0090265  | 10.010989   | 9.6096085   | 10.0906765  | 10.0747645  |
| "Gstp1"         | 13.570982   | 12.919382   | 13.363548   | 13.126817   | 13.198866   | 12.947463   | 13.723456   | 13.232116   |
| "Gstt1"         | 7.731409    | 4.837527    | 7.4503794   | 6.7266183   | 7.34842     | 6.368393    | 7.4225903   | 7.063484    |
| "Gstt2"         | 3.8663292   | 3.7538178   | 4.3707943   | 4.7039127   | 6.321238    | 6.462188    | 5.546029    | 5.062463    |
| "Gstt3"         | 3.6439214   | 2.9061759   | 3.1960523   | 3.4661655   | 3.266902    | 3.15439     | 3.2388167   | 3.6663656   |
| "Gstz1"         | 8.655685    | 7.2873306   | 7.9397855   | 7.1975017   | 8.964476    | 8.636606    | 8.991054    | 7.6607685   |
| "Gt(ROSA)26Sor" | 6.498868    | 7.480629    | 7.529699    | 8.018       | 7.1605725   | 7.0734277   | 7.6324987   | 7.9108224   |
| "Gtf2a1"        | 4.835442567 | 5.147814233 | 4.812489967 | 5.068727967 | 5.008524433 | 5.3826856   | 4.8553153   | 5.111679267 |
| "Gtf2b"         | 8.418961    | 8.502914    | 7.406246    | 7.8059707   | 8.215742    | 8.880138    | 7.743166    | 7.530723    |
| "Gtf2e2"        | 6.6860375   | 6.3868957   | 7.4535456   | 7.5702806   | 7.117316    | 6.6013794   | 7.298755    | 7.474225    |
| "Gtf2f1"        | 6.28908205  | 6.4167368   | 6.5104225   | 6.133233    | 6.18329135  | 6.17898915  | 6.4187485   | 6.34715     |
| "Gtf2f2"        | 6.515986    | 6.990265    | 6.4046903   | 6.672933    | 6.437042    | 6.5549035   | 6.557575    | 6.7457833   |
| "Gtf2h1"        | 7.3709774   | 7.266105    | 7.2774973   | 7.2935777   | 7.099369    | 7.393464    | 7.0841217   | 7.33493     |
| "Gtf2h2"        | 6.536035    | 6.9912405   | 6.552986    | 6.981948    | 6.5221024   | 6.312891    | 6.78121     | 6.8790426   |
| "Gtf2h3"        | 3.5576193   | 3.52354     | 3.7057383   | 3.9351804   | 3.656786    | 3.5954401   | 3.944527    | 3.7168148   |
| "Gtf2h4"        | 5.474221175 | 5.9611034   | 6.0394151   | 6.175082125 | 5.928927925 | 5.580812425 | 6.172482475 | 6.0735145   |
| "Gtf2i"         | 5.431429025 | 5.56839805  | 5.734461225 | 5.791639075 | 5.573105175 | 5.477652425 | 5.67725935  | 5.76406915  |
| "Gtf2ird1"      | 4.2224284   | 4.6042975   | 4.11380715  | 4.1704037   | 4.3318505   | 4.111542    | 4.35084365  | 3.94580915  |
| "Gtf2ird2"      | 5.321157    | 6.42445     | 5.3785377   | 5.501598    | 5.363874    | 5.460914    | 4.9979463   | 5.4781218   |
| "Gtf3a"         | 8.857722    | 8.811606    | 9.136025    | 9.363459    | 8.637876    | 8.179758    | 9.819077    | 9.331746    |
| "Gtf3c1"        | 6.5808425   | 6.9093266   | 6.6843777   | 6.787468    | 6.597431    | 6.853053    | 6.7468696   | 6.7679396   |
| "Gtf3c2"        | 6.43308365  | 7.06626215  | 6.154881025 | 6.35311305  | 6.6579284   | 6.664055925 | 6.56263425  | 6.656892625 |
| "Gtf3c4"        | 7.1449847   | 8.304004    | 6.8723283   | 6.645208    | 7.4379034   | 9.058556    | 6.686448    | 7.0355735   |
| "Gtf3c5"        | 4.5634084   | 4.0883427   | 4.9039783   | 4.5306854   | 4.585572    | 4.5248632   | 4.877714    | 4.6402025   |
| "Gtf3c6"        | 5.4557114   | 5.50714835  | 5.63032865  | 5.7629358   | 5.37834995  | 5.13968935  | 5.75274015  | 5.56962     |
| "Gtl3"          | 6.6912727   | 6.330254    | 6.659975    | 6.4541385   | 6.86859825  | 6.6495874   | 6.52587675  | 6.64390495  |
| "Gtpbp1"        | 3.8067584   | 3.8233965   | 3.83575825  | 3.8765497   | 3.85189895  | 3.78552105  | 3.8283734   | 3.8564035   |
| "Gtpbp2"        | 5.061951667 | 5.363457467 | 5.278217    | 5.582253733 | 5.327226    | 5.2245438   | 5.1419138   | 5.338319633 |
| "Gtpbp3"        | 3.8953958   | 3.782006    | 3.9057958   | 4.0189614   | 3.8858478   | 4.053337    | 3.7118094   | 3.9148423   |
| "Gtpbp4"        | 8.656640667 | 9.265897667 | 8.091965233 | 8.812860467 | 8.825182333 | 8.941278    | 8.4738575   | 8.810347667 |
| "Gtpbp5"        | 3.7921858   | 3.80148715  | 3.8109281   | 3.730714    | 3.69265085  | 3.7727674   | 3.86983065  | 3.78657525  |
| "Gtpbp6"        | 4.2248526   | 4.3559504   | 3.840434    | 4.222405    | 4.2064376   | 4.2450786   | 4.055519    | 4.1141343   |
| "Gtpbp8"        | 4.0513463   | 4.1419077   | 4.3696404   | 4.579264    | 4.4445252   | 4.511292    | 4.783126    | 4.5194955   |
| "Gtse1"         | 2.4624248   | 2.5415368   | 2.4916599   | 2.5447211   | 2.505047    | 2.472125    | 2.4860032   | 2.5440502   |
| "Guca2b"        | 2.3034084   | 2.3341787   | 2.316217    | 2.242335    | 2.3165731   | 2.292992    | 2.3076937   | 2.3825052   |
| "Gucy1a3"       | 2.4908248   | 2.68813265  | 2.57618355  | 2.7929632   | 2.8831803   | 2.4969318   | 2.52794195  | 2.6220715   |
| "Gucy1b3"       | 3.63592     | 3.9343025   | 3.9131985   | 4.08272675  | 3.9085927   | 4.07003345  | 3.68482065  | 4.2425803   |
| "Gucy2c"        | 2.4441636   | 2.5372977   | 2.476247    | 2.5710084   | 2.4752972   | 2.4338882   | 2.4752398   | 2.5638087   |
| "Guk1"          | 7.87083     | 7.6411514   | 7.74863     | 7.9671845   | 7.524157    | 7.212556    | 7.8477383   | 7.909454    |
| "Gulo"          | 4.670147    | 2.0115113   | 1.9974172   | 2.0547426   | 2.0070162   | 1.9830198   | 1.9947246   | 2.0574787   |
| "Gusb"          | 5.07570305  | 3.88122885  | 4.8497101   | 4.3806072   | 4.7339504   | 4.71519235  | 5.20017695  | 4.5309717   |
| "Gyg"           | 12.588184   | 12.919939   | 13.098991   | 13.250131   | 12.88641    | 12.687716   | 13.042149   | 13.263498   |
| "Gyk"           | 5.6040718   | 3.7166983   | 3.5361756   | 3.5947637   | 3.79699515  | 3.60703565  | 3.59811435  | 3.7525104   |
| "Gyki1"         | 2.4303586   | 2.5518367   | 2.5073814   | 2.623309    | 2.5020964   | 2.4821706   | 2.4850225   | 2.5828407   |
| "Gypa"          | 2.9311752   | 3.3019238   | 2.980451    | 3.0719886   | 2.9012876   | 3.0986829   | 2.8424182   | 3.1206155   |
| "Gypc"          | 6.1921835   | 7.1508255   | 7.5189047   | 7.4950294   | 7.233088    | 6.9228005   | 7.46232     | 7.2060676   |
| "Gys1"          | 7.24679325  | 7.26651675  | 7.20436285  | 8.1219005   | 7.9204845   | 6.94951285  | 7.2338225   | 7.8540715   |
| "Gys2"          | 5.7561603   | 2.3003016   | 2.3035107   | 2.355623    | 2.3063712   | 2.2939239   | 2.9729      | 2.377028    |
| "Gzma"          | 2.790295    | 2.605981    | 2.593441    | 2.643106    | 2.6064065   | 2.5959384   | 2.598404    | 2.6458519   |
| "Gzmc"          | 2.5042858   | 2.601692    | 2.5376348   | 2.6349695   | 2.539564    | 2.501495    | 2.5352044   | 2.6281662   |
| "Gzmd"          | 2.549924367 | 2.682159667 | 2.593184233 | 2.6984185   | 2.600106567 | 2.53423     | 2.588569233 | 2.6805572   |
| "Gzme"          | 2.8620899   | 3.0303552   | 2.962794    | 3.0780835   | 2.9751663   | 2.9311075   | 2.9682415   | 3.0530856   |
| "Gzmf"          | 3.0435295   | 3.3127985   | 3.119304    | 3.2307684   | 3.13325     | 3.0566976   | 3.1087363   | 3.2485363   |
| "Gzmg"          | 2.2906315   | 2.383526    | 2.3406532   | 2.433037    | 2.3425727   | 2.3097892   | 2.338374    | 2.4249918   |
| "Gzmk"          | 2.7758033   | 2.8898516   | 2.8235755   | 2.885592    | 2.8478992   | 2.8236096   | 2.8234046   | 2.888077    |
| "Gzmm"          | 2.389486    | 4.7368217   | 2.3682137   | 2.508122    | 2.4979866   | 2.4075222   | 2.3933368   | 2.2970788   |
| "Gzmn"          | 2.6637468   | 2.7660391   | 2.7036214   | 2.815506    | 2.7036214   | 2.6625724   | 2.7019439   | 2.7937522   |
| "H13"           | 3.67593678  | 3.6789963   | 3.636639    | 3.48719054  | 3.65737816  | 3.77161226  | 3.61804806  | 3.5906354   |
| "H19"           | 12.584222   | 9.3468075   | 11.220239   | 11.330966   | 11.152601   | 10.067596   | 12.953359   | 11.752854   |
| "H1f0"          | 8.828642    | 9.856315    | 8.73780665  | 8.94287985  | 9.27084425  | 9.36429975  | 8.778902    | 8.7893282   |
| "H1foo"         | 2.7604322   | 2.935498    | 2.8400974   | 2.9139671   | 2.8496552   | 2.8348444   | 2.8478136   | 2.9306624   |
| "H2-Aa"         | 7.90171575  | 5.75831605  | 8.268962    | 7.4983522   | 7.82187585  | 9.4773405   | 8.9041735   | 7.7358232   |
| "H2-Ab1"        | 6.3212825   | 4.396503033 | 6.603320233 | 6.107874233 | 6.3055712   | 7.6483929   | 7.2462069   | 6.153791433 |
| "H2-B1"         | 3.146387    | 3.3152537   | 3.1581635   | 3.3827777   | 3.17471     | 3.17407     | 3.1631875   | 3.2183223   |
| "H2-D1"         | 6.889858811 | 5.962026333 | 6.354292111 | 6.275438744 | 6.7799206   | 7.072752133 | 7.063810133 | 6.495826478 |
| "H2-DMa"        | 4.5240207   | 2.9933136   | 5.2354693   | 4.2121983   | 4.806206    | 6.1655693   | 4.932643    | 5.957227    |
| "H2-DMb1"       | 3.33487595  | 2.7816835   | 3.7692004   | 3.44207905  | 3.48231765  | 5.01182265  | 3.69512315  | 3.4104435   |
| "H2-DMb2"       | 2.9993727   | 3.2476852   | 3.2130978   | 3.305351    | 3.175029    | 3.1539493   | 3.0870876   | 3.2435577   |
| "H2-Ea-ps"      | 2.63485965  | 3.1087763   | 2.7334499   | 2.9130488   | 3.00881385  | 2.7311876   | 2.7055864   | 2.8764913   |
| "H2-Eb1"        | 7.508851    | 5.7725935   | 7.94134     | 7.3839197   | 7.5904765   | 9.170656    | 8.819335    | 7.2690544   |
| "H2-K1"         | 8.6009193   | 7.039397    | 7.511393775 | 7.12227565  | 8.03684975  | 8.490746225 | 8.4105965   | 7.5062877   |
| "H2-Ke2"        | 9.242984    | 9.641068    | 9.677143    | 9.516535    | 9.202403    | 9.144996    | 9.593097    | 9.516968    |
| "H2-Ke6"        | 8.637174    | 8.255157    | 8.3245      | 8.324666    | 8.360524    | 8.038334    | 9.025015    | 8.565492    |

|            |             |             |             |             |             |             |             |             |
|------------|-------------|-------------|-------------|-------------|-------------|-------------|-------------|-------------|
| "H2-M10.1" | 2.1995053   | 2.273919    | 2.3891876   | 2.3246346   | 2.2276208   | 2.2004533   | 2.2312088   | 2.3197017   |
| "H2-M3"    | 5.1315556   | 5.03697     | 6.5839524   | 5.718158    | 6.1793847   | 6.9689345   | 6.530629    | 6.0385876   |
| "H2-M9"    | 2.5627685   | 2.7250586   | 2.66306     | 2.7580743   | 2.7920394   | 2.8164754   | 2.7216825   | 2.774517    |
| "H2-Oa"    | 1.9244028   | 1.9670607   | 1.9525194   | 2.0184026   | 1.9472387   | 4.2156563   | 1.9310476   | 2.0149872   |
| "H2-Ob"    | 2.4523027   | 2.5188115   | 2.4982593   | 2.6243384   | 2.5052655   | 3.2766817   | 2.4913654   | 2.5678008   |
| "H2-Q10"   | 9.778179    | 3.4076087   | 4.959718    | 3.23839     | 4.659608    | 3.4678247   | 5.0846868   | 4.4360523   |
| "H2-Q2"    | 2.906505    | 3.1553438   | 3.0088763   | 3.1930685   | 3.018751    | 2.9589248   | 3.0001903   | 3.1470006   |
| "H2-Q4"    | 3.8046298   | 4.0788374   | 4.0862617   | 4.405775    | 4.125235    | 4.5976124   | 4.743885    | 4.2328258   |
| "H2-Q6"    | 7.4219904   | 5.8514667   | 5.7849097   | 6.7357116   | 6.6168256   | 8.359179    | 7.8815885   | 6.946481    |
| "H2-Q7"    | 8.342017    | 6.365094    | 6.635588    | 7.2813334   | 7.2480855   | 9.30426     | 8.497063    | 7.5116534   |
| "H2-T10"   | 8.529042    | 7.3982973   | 8.097223    | 8.087204    | 8.531245    | 8.642366    | 9.093474    | 8.350467    |
| "H2-T18"   | 3.4935443   | 3.8305645   | 3.628383    | 3.826188    | 3.4988873   | 3.4336147   | 3.5810647   | 3.623671    |
| "H2-T24"   | 2.5172522   | 2.660306    | 2.5887673   | 2.715004    | 2.5884366   | 2.566586    | 2.7546322   | 2.6571996   |
| "H28"      | 2.72635985  | 2.910663    | 2.81485475  | 2.9817475   | 2.82234635  | 2.782879    | 2.7745009   | 2.9241604   |
| "H2afj"    | 5.3974131   | 5.1160667   | 5.0435071   | 5.03380525  | 5.09313085  | 5.16719515  | 5.43721315  | 5.0356587   |
| "H2afv"    | 9.583628    | 9.437115    | 10.107757   | 9.710461    | 9.508219    | 9.242044    | 10.322519   | 9.94645     |
| "H2afx"    | 5.659173    | 5.7646513   | 5.757255    | 5.770434    | 5.7548094   | 6.4979477   | 5.7603765   | 5.7011085   |
| "H2afy"    | 9.758959    | 9.779246    | 10.25789    | 10.149773   | 9.899947    | 10.047337   | 9.978828    | 10.013191   |
| "H2afy2"   | 2.2850342   | 2.479602    | 2.3405218   | 2.5359085   | 2.3382807   | 2.2819815   | 2.3331895   | 2.561307    |
| "H2afy3"   | 2.2821732   | 2.3488204   | 2.3206394   | 2.404827    | 2.3515868   | 2.2883735   | 2.3112872   | 2.380174    |
| "H2afz"    | 9.3837255   | 9.284607    | 10.0754485  | 10.2701865  | 9.692767    | 9.606734    | 9.8952145   | 10.2832445  |
| "H47"      | 8.9832958   | 8.537067333 | 9.0605884   | 8.735939    | 9.1416768   | 8.791044267 | 8.907724533 | 9.122852867 |
| "H6pd"     | 8.901869    | 10.672668   | 6.885515    | 6.5084796   | 8.091579    | 9.289299    | 7.012564    | 6.874403    |
| "Haao"     | 5.5620656   | 2.0670033   | 2.3881636   | 2.0795548   | 2.0506158   | 1.994262    | 1.902614    | 1.9918394   |
| "Habp4"    | 4.7847035   | 4.93843295  | 4.96486855  | 5.1011047   | 4.75715195  | 4.3259704   | 4.8087441   | 5.0166727   |
| "Hace1"    | 4.214873    | 4.481352    | 4.4792385   | 4.4249296   | 4.355275    | 4.2458463   | 4.3354654   | 4.48781     |
| "Hac11"    | 10.089993   | 5.4293485   | 6.6255355   | 5.928469    | 6.644582    | 7.2602367   | 6.706       | 6.413057    |
| "Hadh"     | 9.328202567 | 8.9388843   | 9.727731333 | 9.8210699   | 9.749275267 | 9.332074333 | 9.581780267 | 9.894131    |
| "Hadhha"   | 9.054449    | 8.868854    | 8.92702     | 9.19231     | 9.511475    | 8.963208    | 9.074446    | 9.430802    |
| "Hadhba"   | 11.510507   | 11.3889265  | 11.571083   | 11.896285   | 11.9708535  | 11.6478835  | 11.7207505  | 12.40563    |
| "Hagh"     | 10.03240267 | 9.502820667 | 9.794503    | 9.709362    | 9.769756667 | 9.513277667 | 9.7557195   | 9.75749     |
| "Hal"      | 8.844816    | 2.132173    | 3.0307395   | 2.181829    | 2.1087651   | 2.0732064   | 2.10226     | 2.1802373   |
| "Hamp"     | 11.4167375  | 3.38340915  | 3.382955    | 3.44883975  | 3.6655053   | 3.18568415  | 3.32948205  | 3.79347215  |
| "Hamp2"    | 5.089121    | 3.3913093   | 4.1408253   | 3.4419155   | 3.3713071   | 3.3328257   | 3.3513925   | 3.42102     |
| "Hand1"    | 2.3113766   | 2.3920417   | 2.3345914   | 2.4304347   | 2.3580835   | 2.3398004   | 2.3464377   | 2.4403534   |
| "Hand2"    | 2.298653    | 2.4784331   | 2.4745512   | 2.686458    | 2.4811256   | 2.4524367   | 2.4724405   | 2.586266    |
| "Hao1"     | 5.913017    | 2.1229315   | 2.1015847   | 2.1712093   | 2.1070023   | 2.0612557   | 2.0989559   | 2.1706095   |
| "Hao2"     | 2.2739813   | 2.4486504   | 2.41119256  | 2.5041924   | 2.4126642   | 2.3805776   | 2.4101033   | 2.4950464   |
| "Hap1"     | 2.4432528   | 2.5074816   | 2.4552596   | 2.5131261   | 2.4524214   | 2.4353824   | 2.4504642   | 2.55353     |
| "Hapln1"   | 2.85920795  | 3.0412471   | 2.9287069   | 3.1039082   | 2.9297074   | 2.8554355   | 2.9153236   | 3.0468863   |
| "Hapln2"   | 2.2529228   | 2.3561962   | 2.292788    | 2.4320846   | 2.2897563   | 2.2493627   | 2.289689    | 2.371696    |
| "Hars"     | 8.3001845   | 8.5141095   | 8.331436    | 8.3194415   | 8.26737975  | 8.0178065   | 8.63433725  | 8.2750695   |
| "Hars2"    | 4.95789075  | 5.313872    | 5.3631555   | 5.8723005   | 5.25566815  | 5.0558358   | 5.3986519   | 5.8161182   |
| "Has2"     | 2.45039415  | 2.53228655  | 2.49788595  | 2.6702226   | 2.4988556   | 2.4864597   | 2.50586125  | 2.5659292   |
| "Has3"     | 2.1065185   | 2.1486073   | 2.1400437   | 2.4843369   | 2.1186795   | 2.1216567   | 2.139504    | 2.2216573   |
| "Hat1"     | 8.056297    | 7.7460575   | 7.9907045   | 8.21316     | 8.032473    | 7.6978354   | 8.003954    | 8.423401    |
| "Haus1"    | 8.138456    | 8.293627    | 8.246307    | 8.215654    | 8.149363    | 7.312194    | 8.708311    | 8.040808    |
| "Haus2"    | 6.4678965   | 6.817783    | 6.101738    | 6.5340624   | 6.5595512   | 6.345517    | 6.564084    | 6.5011244   |
| "Haus3"    | 6.557263    | 5.8877096   | 6.581214    | 6.5916085   | 6.5797358   | 7.02039     | 6.6947227   | 7.0355673   |
| "Haus4"    | 5.923392    | 5.2843494   | 5.9572678   | 5.537442    | 5.71626     | 5.514578    | 5.8141756   | 5.9589596   |
| "Haus5"    | 5.705195967 | 6.154678333 | 5.644200133 | 5.6751898   | 5.8121991   | 5.859415467 | 5.599386933 | 5.5802707   |
| "Haus6"    | 3.5558112   | 3.98347     | 3.920285    | 3.922594    | 3.9277837   | 3.706076    | 3.9323645   | 4.193342    |
| "Haus7"    | 6.2040663   | 6.878891    | 6.908784    | 6.614221    | 6.678044    | 5.701516    | 6.891909    | 6.2858276   |
| "Haus8"    | 2.7763522   | 2.7650614   | 2.5602243   | 2.641695    | 2.9708624   | 2.960258    | 3.024406    | 2.8267415   |
| "Havcr1"   | 2.3919866   | 2.527892    | 2.4319577   | 2.5454688   | 2.4399805   | 2.4010162   | 2.430039    | 2.541983    |
| "Hax1"     | 9.5639005   | 9.6616655   | 9.484861    | 9.4407235   | 9.426302    | 9.7568735   | 9.6581085   | 9.4049405   |
| "Hba-a1"   | 12.93845767 | 12.898915   | 12.03429067 | 12.29026033 | 13.24027267 | 13.35292883 | 11.81145267 | 13.07923633 |
| "Hba-x"    | 2.2717535   | 2.3924327   | 2.3059988   | 2.4093876   | 2.3123207   | 2.295578    | 2.303385    | 2.4007182   |
| "Hbb-b2"   | 4.0199637   | 4.066376    | 3.964564    | 4.114418    | 4.040146    | 4.025507    | 3.945025    | 4.1142488   |
| "Hbb-bh1"  | 2.4641583   | 2.5177422   | 2.476392    | 2.5830672   | 2.4836643   | 2.419552    | 2.4741974   | 2.566053    |
| "Hbb-y"    | 2.591267567 | 2.7139356   | 2.639747067 | 2.773545367 | 2.649063367 | 2.5940599   | 2.636661767 | 2.745441933 |
| "Hbegf"    | 6.8574805   | 5.2707188   | 7.594025    | 6.70133495  | 5.6862235   | 6.068287    | 6.48380755  | 6.36785125  |
| "Hbp1"     | 7.878471567 | 8.4360225   | 7.6623262   | 7.576022667 | 8.0309961   | 8.265247867 | 7.389176    | 7.753034433 |
| "Hbxip"    | 10.47895    | 10.6942155  | 10.390926   | 10.741899   | 10.395935   | 10.3577715  | 10.42065    | 10.6519625  |
| "Hc"       | 9.797356    | 2.5921986   | 2.641546    | 2.636216    | 2.5945532   | 2.5499983   | 2.5760703   | 2.6320894   |
| "Hccs"     | 6.4888046   | 5.7117772   | 6.579043    | 6.8071315   | 6.641532    | 5.77835     | 6.47514975  | 7.03002575  |
| "Hcfc1"    | 4.325198767 | 4.794548333 | 4.4429128   | 4.395953067 | 4.410149033 | 4.461591833 | 4.2972257   | 4.40909     |
| "Hcfc1r1"  | 10.8992145  | 10.473445   | 10.35951    | 10.297686   | 10.5081525  | 9.6421335   | 11.260899   | 10.0115545  |
| "Hck"      | 4.7234497   | 2.3206172   | 2.3704689   | 2.3653052   | 2.3376267   | 4.8867292   | 2.5454085   | 2.3938024   |
| "Hcls1"    | 2.908907    | 2.4169734   | 2.3932042   | 2.443245    | 2.4247699   | 3.6339598   | 2.4202163   | 2.445177    |
| "Hcn1"     | 2.3460886   | 2.4275923   | 2.387399    | 2.497399    | 2.3890598   | 2.3368661   | 2.3827028   | 2.778475    |
| "Hcn2"     | 3.5025957   | 3.703731    | 3.5928733   | 3.7695804   | 3.6011338   | 3.52027     | 3.5538564   | 3.6757426   |
| "Hcst"     | 2.116844    | 2.1274145   | 2.1160104   | 2.1624568   | 2.1078951   | 3.1825755   | 2.1210008   | 2.1231384   |
| "Hdac1"    | 5.8285503   | 5.7121444   | 6.3356557   | 6.497914    | 6.518571    | 6.7379637   | 6.425699    | 6.4589624   |
| "Hdac11"   | 3.622506    | 3.203581    | 3.6288002   | 3.4568603   | 4.0317235   | 3.2057085   | 3.6279254   | 3.7466495   |
| "Hdac2"    | 8.068706    | 8.217117    | 9.319789    | 9.765915    | 8.397981    | 8.172814    | 9.494612    | 9.902222    |
| "Hdac3"    | 7.833583    | 8.27841     | 8.693903    | 8.840566    | 8.236333    | 8.308157    | 8.533292    | 8.517212    |
| "Hdac5"    | 6.5874996   | 7.1357994   | 6.3085794   | 6.2277613   | 6.803261    | 6.497269    | 6.1556683   | 6.3289676   |
| "Hdac6"    | 3.8793204   | 3.9952533   | 3.99997     | 4.0095167   | 4.0418057   | 3.9100475   | 3.949246    | 3.9147294   |
| "Hdac7"    | 3.70318785  | 3.98703715  | 3.99397565  | 3.5917892   | 4.29087585  | 3.9301887   | 3.91532575  | 3.7013237   |
| "Hdac9"    | 2.4066904   | 2.4993184   | 2.4597979   | 2.5677834   | 2.455029    | 2.4064844   | 2.4616528   | 2.517974    |

|              |             |             |             |             |             |             |             |             |
|--------------|-------------|-------------|-------------|-------------|-------------|-------------|-------------|-------------|
| "Hdc"        | 3.1085099   | 2.99810385  | 3.0054458   | 3.0533379   | 2.95422485  | 3.0303174   | 3.02124915  | 3.0725724   |
| "Hddc2"      | 6.8169928   | 6.8600674   | 7.589594    | 7.7191143   | 7.014435    | 6.7786326   | 7.2740097   | 7.59851     |
| "Hdgf"       | 7.970960267 | 8.452494667 | 8.556381333 | 8.675309567 | 8.125558333 | 8.101177667 | 8.464108333 | 8.5267952   |
| "Hdgff1"     | 2.42384     | 2.5294814   | 2.4680534   | 2.55163455  | 2.4736924   | 2.4469939   | 2.4716704   | 2.5251659   |
| "Hdgfrp2"    | 3.958312933 | 4.276048233 | 3.975129    | 4.041243233 | 4.0304588   | 3.991097    | 4.123166    | 3.975299833 |
| "Hdgfrp3"    | 3.904450633 | 4.239472067 | 4.3129849   | 4.244514133 | 4.2858959   | 4.327526067 | 4.128938067 | 4.2458787   |
| "Hdhd2"      | 7.0820136   | 6.690482    | 7.9087462   | 8.026365    | 7.4210443   | 6.8001876   | 7.7725215   | 7.858878    |
| "Hdlbp"      | 8.3132784   | 8.52925134  | 8.5844992   | 8.54800636  | 8.29475172  | 8.42881648  | 8.2695324   | 8.4361958   |
| "Heatr1"     | 4.37380835  | 4.8064897   | 4.05266595  | 4.20128895  | 4.26988365  | 4.6685369   | 4.26829965  | 4.14080235  |
| "Heatr2"     | 6.157047    | 6.9750624   | 6.6686053   | 6.983475    | 6.834819    | 6.937375    | 6.357106    | 6.685129    |
| "Heatr5b"    | 2.6823487   | 2.826233    | 2.8085399   | 2.9445677   | 2.7692199   | 2.7069945   | 2.751039    | 2.9056997   |
| "Heatr6"     | 4.1435275   | 4.516755967 | 4.573040133 | 4.514693867 | 4.3289932   | 4.6991516   | 4.401720033 | 4.363348033 |
| "Heatr7a"    | 3.7249374   | 4.473333    | 3.8178058   | 4.1759615   | 4.028236    | 4.409449    | 4.0110774   | 3.8430467   |
| "Hebp1"      | 9.116299    | 6.5938277   | 7.888931    | 6.748798    | 7.8890486   | 7.8678694   | 8.03057     | 7.046182    |
| "Hebp2"      | 2.4261223   | 2.55215205  | 3.13202565  | 2.6279135   | 2.5226239   | 2.49910815  | 2.59171505  | 2.5985712   |
| "Hectd1"     | 12.275521   | 13.162074   | 10.846077   | 10.863489   | 12.269155   | 13.327801   | 10.711885   | 11.126732   |
| "Hectd3"     | 5.3695507   | 6.0233502   | 5.033409    | 5.314065    | 5.6536207   | 5.5832043   | 5.3677807   | 5.400075    |
| "Helb"       | 2.975730867 | 3.178685167 | 2.742054233 | 3.196156167 | 3.6689538   | 3.214150767 | 2.995085967 | 3.023335333 |
| "Hells"      | 2.4820008   | 2.5675833   | 2.5171874   | 2.6174436   | 2.4823155   | 2.6435404   | 2.5152135   | 2.5832648   |
| "Helz"       | 6.632122    | 7.17947315  | 6.9191108   | 6.75702465  | 7.0286463   | 7.4078535   | 6.9329082   | 6.98713835  |
| "Hemk1"      | 3.2498825   | 3.352409    | 3.344704    | 3.456089    | 3.3576574   | 3.1770892   | 3.9372303   | 3.354986    |
| "Heph"       | 2.6527781   | 3.2881143   | 4.168025    | 3.3440378   | 6.026128    | 4.908032    | 5.130844    | 3.4393296   |
| "Herc1"      | 5.24677125  | 5.7495144   | 5.6397721   | 5.77092875  | 5.57593185  | 5.5488968   | 5.2530818   | 5.80325975  |
| "Herc2"      | 5.5364576   | 5.6975815   | 5.762591    | 5.88160425  | 5.82450805  | 5.7804683   | 5.54186865  | 5.92282145  |
| "Herc4"      | 5.5973625   | 5.5869484   | 5.3372183   | 5.3687118   | 5.5469505   | 5.6758041   | 5.44852485  | 5.4432185   |
| "Herpud1"    | 10.5193205  | 11.1187535  | 9.7990485   | 9.964416    | 10.129552   | 10.658866   | 9.6151905   | 10.102367   |
| "Herpud2"    | 8.954574667 | 9.484124    | 8.576994867 | 8.785406333 | 9.205818567 | 9.178627233 | 8.747802667 | 8.879814333 |
| "Hes1"       | 5.309165    | 4.4526443   | 5.843081    | 5.842806    | 4.317481    | 3.9816413   | 6.315863    | 6.0428634   |
| "Hes5"       | 2.80216035  | 3.091349    | 2.91689165  | 3.45691     | 2.9119232   | 2.84219155  | 2.9484767   | 3.02346295  |
| "Hes6"       | 5.4513263   | 4.5216428   | 4.9864738   | 5.22699815  | 4.6009337   | 4.5597726   | 6.27397915  | 5.0408983   |
| "Hes7"       | 2.8002214   | 2.9137893   | 2.8092155   | 2.9950645   | 2.8226643   | 2.711863    | 2.795876    | 2.8488357   |
| "Hexa"       | 10.725684   | 9.614528    | 10.113349   | 9.625741    | 10.203719   | 10.241928   | 10.782625   | 9.871629    |
| "Hexb"       | 8.05571885  | 6.969183    | 8.1982188   | 7.776755    | 8.0177765   | 8.6172705   | 8.5078095   | 8.0741105   |
| "Hexdc"      | 3.9388568   | 3.5249038   | 5.0130615   | 4.7416525   | 3.9492471   | 3.901025    | 4.6467304   | 4.6569777   |
| "Hexim1"     | 6.45279485  | 6.60170375  | 6.94869285  | 6.88197675  | 6.60290785  | 6.86947295  | 7.523536    | 7.02295475  |
| "Hey1"       | 3.661431    | 3.59842     | 3.261188    | 3.6422741   | 3.586984    | 3.763513    | 3.4003773   | 3.644736    |
| "Hey2"       | 3.4608579   | 3.8272324   | 3.7025678   | 3.788838    | 3.688353    | 3.9166563   | 3.5660427   | 3.785861    |
| "Heyl"       | 2.6205538   | 2.63576705  | 2.95803565  | 2.85741425  | 2.7050704   | 2.645657    | 2.6132337   | 2.7795874   |
| "Hfe"        | 6.72230245  | 5.83080325  | 6.4072406   | 6.08795735  | 6.11389565  | 5.9016762   | 6.8620025   | 5.90554815  |
| "Hgd"        | 9.891091    | 2.3260226   | 2.36066     | 2.3656507   | 2.3224275   | 2.2892334   | 2.312375    | 2.3997998   |
| "Hgf"        | 2.36938465  | 2.4513744   | 2.4098142   | 2.49573685  | 2.4103268   | 2.37324175  | 2.4081929   | 2.48011215  |
| "Hgfac"      | 6.8261523   | 2.0199652   | 2.0119867   | 2.0687735   | 2.0069385   | 1.9927076   | 2.0058684   | 2.0596054   |
| "Hgs"        | 5.9864154   | 6.2121425   | 4.316418    | 4.9466686   | 5.8393154   | 6.7460575   | 6.097068    | 5.462961    |
| "Hgsnat"     | 8.15358     | 7.724612    | 8.000885    | 8.152111    | 7.7032294   | 7.718137    | 7.96464196  | 7.8371077   |
| "Hhatl"      | 8.516251    | 9.728683    | 10.164978   | 9.730146    | 9.237026    | 9.027266    | 8.803297    | 9.631283    |
| "Hhex"       | 4.906248    | 2.8985646   | 2.8932893   | 2.9468699   | 2.837763    | 4.0475197   | 2.861019    | 2.9470806   |
| "Hhip"       | 2.9145522   | 3.1292033   | 2.935458    | 3.1095245   | 2.94773     | 2.8741488   | 2.9224257   | 3.0733747   |
| "Hiat1"      | 6.61144985  | 6.6756463   | 6.60667395  | 6.9752377   | 6.8118275   | 7.16876075  | 6.5034787   | 6.751235    |
| "Hiatl1"     | 6.7149534   | 5.8101044   | 6.78767     | 6.6367497   | 6.6883287   | 7.0653443   | 6.6683207   | 6.741026    |
| "Hibad1"     | 10.6037735  | 10.643376   | 10.6754275  | 10.6663445  | 10.944062   | 10.8132125  | 10.699906   | 10.875981   |
| "Hibch"      | 7.4630665   | 7.2889785   | 7.795663    | 8.4963536   | 8.0614249   | 8.2104145   | 8.390618    | 8.4667168   |
| "Hic1"       | 4.032883    | 4.370951    | 4.960619    | 4.615365    | 4.3946986   | 4.367124    | 4.3797746   | 4.47032     |
| "Hic2"       | 3.087307    | 3.1965384   | 3.1216605   | 3.3484974   | 3.1234715   | 3.043632    | 3.125348    | 3.1858947   |
| "Hif1a"      | 5.802278433 | 5.6047228   | 5.768661833 | 5.6855171   | 5.8622462   | 5.726206867 | 5.784326467 | 5.9945128   |
| "Hif3a"      | 2.4287772   | 2.930014967 | 2.364041933 | 2.4276789   | 2.539910167 | 2.872732533 | 2.374419667 | 2.405450833 |
| "Higd1a"     | 7.701705    | 8.167835867 | 8.1880819   | 8.635112467 | 8.005287767 | 7.823801833 | 7.757065867 | 8.523509    |
| "Higd1b"     | 4.9112654   | 4.6648297   | 5.219696    | 4.8793054   | 5.208749    | 4.937067    | 5.653586    | 5.1885977   |
| "Higd2a"     | 11.640575   | 12.037546   | 12.23626    | 12.351449   | 11.876643   | 11.822247   | 11.741989   | 12.148534   |
| "Hilpda"     | 5.9293814   | 4.034647    | 4.413652    | 3.9071984   | 3.4662473   | 3.7277281   | 3.9876897   | 4.00169     |
| "Hils1"      | 3.303594    | 3.3514423   | 3.2957473   | 3.4382308   | 3.3090293   | 3.2696066   | 3.295236    | 3.1661294   |
| "Hinfp"      | 2.07353     | 2.1134672   | 2.4617941   | 2.18094     | 2.1031578   | 2.196319    | 2.071545    | 2.161294    |
| "Hint1"      | 12.926702   | 12.785838   | 12.98856975 | 12.7675565  | 12.785503   | 12.600772   | 13.103882   | 12.6728375  |
| "Hint2"      | 9.125084    | 8.3978815   | 8.509161    | 8.536955    | 8.7605      | 8.349207    | 9.060723    | 8.290224    |
| "Hint3"      | 10.417865   | 10.764833   | 10.640869   | 10.804768   | 10.590624   | 10.167005   | 11.086021   | 10.517679   |
| "Hip1"       | 5.7853615   | 6.83984635  | 5.8256905   | 5.553118    | 5.9947687   | 6.14231945  | 5.68931725  | 5.83768025  |
| "Hip1r"      | 4.7219136   | 4.621356733 | 3.669537367 | 3.919789667 | 3.711373633 | 4.494101567 | 3.680833    | 3.851860233 |
| "Hipk1"      | 6.1790846   | 6.7087322   | 5.8071323   | 5.74748565  | 6.5782658   | 6.898396    | 6.0311695   | 5.8670535   |
| "Hipk2"      | 4.347829075 | 5.1318827   | 4.681973675 | 5.42472175  | 4.485557125 | 4.782546875 | 4.692441875 | 4.97664815  |
| "Hipk3"      | 8.2621393   | 8.4135097   | 8.08194215  | 8.37316485  | 8.06007865  | 8.637923    | 7.9815239   | 8.42778325  |
| "Hira"       | 3.356079967 | 3.767820233 | 3.585158933 | 3.624363667 | 3.431669433 | 3.601165    | 3.514133967 | 3.657776867 |
| "Hist1h1c"   | 12.8482145  | 13.695389   | 11.770524   | 12.2626905  | 13.3133625  | 13.452765   | 11.7379795  | 12.269833   |
| "Hist1h1e"   | 2.6207175   | 2.765839    | 2.7123396   | 2.792142    | 2.7106798   | 2.5798547   | 2.7123797   | 2.77659     |
| "Hist1h1t"   | 2.3543937   | 3.1003935   | 2.5213037   | 2.6326175   | 2.5222297   | 2.4997742   | 2.5220885   | 2.5942297   |
| "Hist1h2ab"  | 8.480517    | 4.56003     | 7.6757145   | 4.6795607   | 6.528936    | 9.085584    | 6.845031    | 5.8679895   |
| "Hist1h2bc"  | 12.296137   | 11.8984175  | 11.883938   | 11.8861015  | 11.9476315  | 11.650331   | 11.77284    | 11.950406   |
| "Hist1h2bp"  | 7.445968    | 7.151629    | 7.061924    | 7.073644    | 7.0798235   | 7.0193343   | 7.0460567   | 7.063313    |
| "Hist1h3a"   | 4.9742575   | 5.417686    | 5.33719     | 5.251486    | 4.4942446   | 5.5881224   | 4.2186675   | 5.245635    |
| "Hist1h3b"   | 3.635936275 | 4.41179785  | 3.90579975  | 3.90636515  | 3.34693455  | 3.92012005  | 3.620851625 | 3.954941625 |
| "Hist1h3f"   | 3.1292117   | 4.519157    | 3.3339133   | 3.8258824   | 3.252032    | 2.9714348   | 2.806232    | 3.24824     |
| "Hist1h4a"   | 7.24487415  | 8.111501225 | 7.073256275 | 7.215785925 | 7.000777925 | 7.247455075 | 6.4928676   | 7.150215625 |
| "Hist2h2aa1" | 8.5181875   | 9.37099075  | 8.605318    | 8.67764025  | 8.8796025   | 8.6713845   | 8.59134275  | 8.675825    |

|             |             |             |             |             |             |             |             |             |
|-------------|-------------|-------------|-------------|-------------|-------------|-------------|-------------|-------------|
| "Hist3h2a"  | 7.1131339   | 6.9367538   | 7.329116    | 7.304337    | 7.04121035  | 7.2674018   | 7.213876    | 7.205424    |
| "Hist3h2ba" | 2.352362    | 2.433447    | 2.3626258   | 2.4151547   | 2.3628664   | 2.3494961   | 2.3637338   | 2.406553    |
| "Hivep1"    | 6.096363    | 5.831014    | 6.3176327   | 6.8732624   | 6.384052    | 6.2105784   | 6.2952156   | 6.6681533   |
| "Hivep2"    | 7.38491415  | 7.7020165   | 7.556607    | 7.84884985  | 7.2769842   | 7.21903945  | 7.24955     | 7.58953335  |
| "Hivep3"    | 3.2514403   | 3.2970302   | 3.2703722   | 3.3453069   | 3.2695968   | 3.245184    | 3.268567    | 3.3361082   |
| "Hk1"       | 5.2607875   | 4.6563034   | 5.494631    | 4.8791456   | 5.144208    | 5.3056374   | 5.587105    | 5.2376876   |
| "Hk2"       | 11.881244   | 10.362968   | 12.004724   | 12.380842   | 11.3955765  | 10.390842   | 12.096098   | 12.256286   |
| "Hkdc1"     | 2.4973462   | 2.5122066   | 2.5041761   | 2.6891584   | 2.501507    | 2.4928775   | 2.5043771   | 2.5471456   |
| "Hlcs"      | 2.7410417   | 2.4946473   | 3.1947017   | 3.1590931   | 3.4411888   | 2.3944602   | 3.2434964   | 2.8532226   |
| "Hlf"       | 2.9104473   | 3.41934825  | 4.48307635  | 5.27771595  | 4.3024713   | 3.48395065  | 4.181535    | 4.7567035   |
| "Hltf"      | 3.711017733 | 3.879767567 | 3.8255444   | 3.8541794   | 3.841711567 | 4.104598467 | 3.919014333 | 4.0471141   |
| "Hlx"       | 4.6746426   | 6.205872    | 4.6464405   | 4.6812177   | 4.639912    | 5.057831    | 4.1770487   | 4.5373335   |
| "Hmbox1"    | 3.3611317   | 3.7814232   | 3.46001025  | 3.58626225  | 3.5001422   | 3.43344295  | 3.6054075   | 3.63762235  |
| "Hmbs"      | 5.9240806   | 5.957789    | 6.3108155   | 6.74485875  | 6.0174935   | 5.8531875   | 6.04608935  | 6.873972    |
| "Hmg20a"    | 4.91713935  | 5.2524147   | 5.5901332   | 5.50086225  | 5.5454333   | 5.35742175  | 5.5827159   | 5.39664615  |
| "Hmga1"     | 5.585631    | 6.583834    | 5.362709    | 5.6724334   | 5.4192815   | 5.928518    | 5.937       | 5.645763    |
| "Hmga2"     | 2.64197065  | 2.68066825  | 2.66699575  | 2.78118875  | 2.6646793   | 2.6271231   | 2.66389355  | 2.7293756   |
| "Hmgb2"     | 8.176128    | 9.5707625   | 6.4520538   | 6.2329223   | 8.034521    | 9.035357    | 6.04751625  | 6.5730635   |
| "Hmgb3"     | 6.129443    | 5.35944     | 5.9710994   | 5.7021847   | 6.624169    | 6.053192    | 5.8469114   | 5.949635    |
| "Hmgb4"     | 2.6142068   | 2.693039    | 2.6216462   | 2.776543    | 2.6379921   | 2.5703702   | 2.6386817   | 2.7273064   |
| "Hmgcl"     | 9.400958    | 7.9123235   | 8.344835    | 8.170468    | 8.356615    | 8.383083    | 8.4857025   | 8.203558    |
| "Hmgcr"     | 5.2929163   | 3.0922115   | 3.054724    | 3.2106752   | 2.9293761   | 2.991622    | 3.0474586   | 3.000616    |
| "Hmgcs1"    | 10.0413635  | 8.07797235  | 9.0952724   | 8.868619375 | 8.84924715  | 8.08464365  | 8.4272485   | 9.0172535   |
| "Hmgcs2"    | 8.0558591   | 3.54827855  | 2.9697316   | 2.90563405  | 4.6241643   | 3.9617697   | 2.9938118   | 3.0947821   |
| "Hmgn1"     | 10.80094717 | 10.25791383 | 11.098356   | 10.73900983 | 10.84180267 | 10.7610285  | 11.3454535  | 10.730733   |
| "Hmgn3"     | 5.6570045   | 5.09297755  | 7.29899045  | 6.61325     | 6.5925565   | 6.374549    | 6.3939729   | 6.432961    |
| "Hmgn5"     | 8.46401     | 7.431823    | 8.387907    | 8.169465    | 8.8924675   | 8.276566    | 8.553902    | 8.580846    |
| "Hmgxb3"    | 7.5879335   | 8.216466    | 7.6441526   | 7.9642034   | 8.029182    | 7.79655     | 7.5639877   | 7.8316894   |
| "Hmgxb4"    | 5.416707    | 5.412017    | 5.49684     | 5.5229654   | 5.6002693   | 5.484057    | 5.4504714   | 5.5244656   |
| "Hmh1a1"    | 3.2602532   | 2.9672043   | 3.0518613   | 3.1627605   | 3.2027647   | 5.6326866   | 3.4057686   | 3.118349    |
| "Hmnr"      | 2.493775325 | 2.58870005  | 2.589433125 | 2.62699295  | 2.550445725 | 2.505469725 | 2.530506325 | 2.62699855  |
| "Hmox1"     | 5.947503    | 3.8010614   | 3.6425683   | 3.6713135   | 3.950114    | 5.2089233   | 3.6391091   | 3.7748535   |
| "Hmox2"     | 8.758829    | 8.439804    | 8.871692    | 8.987165    | 8.7048855   | 8.245592    | 8.81039     | 8.985554    |
| "Hn1"       | 8.706138333 | 8.623552333 | 8.576107333 | 8.811108    | 8.428215333 | 8.575229667 | 9.375058333 | 8.693882667 |
| "Hnf4a"     | 6.3110227   | 2.3720151   | 2.343355225 | 2.427266375 | 2.351114025 | 2.2964726   | 2.32694525  | 2.41266565  |
| "Hnf4g"     | 2.6341023   | 2.814072    | 2.7203429   | 2.847191    | 2.7189224   | 2.642561    | 2.6969414   | 2.8210418   |
| "Hnmt"      | 5.753627    | 5.4534883   | 5.86028     | 6.731581    | 7.0300226   | 5.582027    | 6.5044074   | 6.6649537   |
| "Hnrnpa1"   | 8.74401652  | 9.53243488  | 8.0512996   | 8.17668324  | 8.9766811   | 9.4010022   | 8.0999246   | 8.24048322  |
| "Hnrnpa2b1" | 10.117835   | 10.4180315  | 10.37697975 | 10.45589475 | 10.4733285  | 10.477434   | 10.48873125 | 10.61228338 |
| "Hnrnpa3"   | 8.293716    | 8.85151775  | 8.635697    | 8.40093755  | 8.42851     | 8.65698125  | 8.5403655   | 8.54767625  |
| "Hnrnpab"   | 7.6625805   | 7.837077529 | 8.007329971 | 7.994894071 | 7.751989386 | 7.914142043 | 7.899464571 | 7.970852871 |
| "Hnrnpc"    | 8.08231215  | 8.215675    | 7.746323    | 8.1722585   | 8.1414505   | 8.40789165  | 8.129209    | 8.2938465   |
| "Hnrnpd"    | 8.950119    | 9.327571    | 9.068084    | 9.285694    | 9.383109    | 9.552912    | 9.288586    | 9.008694    |
| "Hnrnpf"    | 9.230213    | 9.850829    | 8.7266445   | 8.396307    | 9.354398    | 9.94437     | 8.492202    | 8.509835    |
| "Hnrnp1"    | 11.402991   | 11.595452   | 11.406847   | 11.44154    | 11.3742485  | 11.815698   | 11.490368   | 11.528504   |
| "Hnrnp2"    | 9.385442    | 9.575544    | 9.464617    | 9.781559    | 9.598326    | 9.421307    | 9.298884    | 9.829845    |
| "Hnrnp3"    | 8.662911    | 8.5177555   | 8.488327    | 8.531183    | 8.392815    | 8.547047    | 8.61534     | 8.670828    |
| "Hnrnpk"    | 8.9943836   | 9.537143825 | 9.0032793   | 8.980466875 | 9.299208375 | 9.28707555  | 8.8690682   | 9.0109834   |
| "Hnrnpl"    | 8.145559    | 8.752601    | 8.019613    | 8.220482    | 8.613382    | 8.589725    | 7.8744497   | 8.036812    |
| "Hnrnppm"   | 8.388867    | 8.8980665   | 8.695754    | 8.6359      | 8.563374    | 8.721504    | 8.700649    | 8.677432    |
| "Hnrnpr"    | 6.574657267 | 6.815767    | 7.062402633 | 7.297055667 | 6.896433633 | 6.776908333 | 6.9834625   | 7.283467333 |
| "Hnrnpu"    | 10.53109    | 10.70872667 | 9.776226    | 9.896811667 | 10.26644133 | 10.74128033 | 10.374295   | 10.076778   |
| "Hnrnpul1"  | 8.688794    | 9.411079    | 8.9255495   | 9.201727    | 8.978955    | 9.137517    | 8.082865    | 9.009737    |
| "Hnrnpul2"  | 6.791682    | 7.014433    | 6.920648    | 6.9610185   | 6.66966065  | 7.2153588   | 6.99516225  | 7.0038755   |
| "Hnrpdl"    | 8.5076971   | 8.957596117 | 9.095799417 | 9.2335705   | 9.004565667 | 9.037459933 | 9.050480883 | 9.302453817 |
| "Hnrpll"    | 8.3235213   | 8.694094    | 7.99327065  | 8.3214107   | 8.2983412   | 8.7351595   | 8.36930275  | 8.3846567   |
| "Hoga1"     | 6.5044074   | 7.46332     | 3.7153862   | 3.048305    | 4.5525894   | 5.435729    | 3.628176    | 3.1385791   |
| "Homer1"    | 3.039634533 | 3.311290767 | 3.8564757   | 4.440821433 | 3.188903533 | 3.0607097   | 3.861838467 | 4.220178433 |
| "Homer2"    | 8.5531225   | 6.8392982   | 8.508796    | 8.8444      | 8.375798    | 6.8908453   | 8.742814    | 9.019843    |
| "Homer3"    | 2.2099767   | 2.2922914   | 2.5262482   | 2.2602222   | 2.2479196   | 2.2383788   | 2.2484767   | 2.2737854   |
| "Hook2"     | 4.16838     | 5.152916    | 3.9230263   | 4.206594    | 4.16301     | 3.8766122   | 4.2093983   | 4.1734266   |
| "Hopx"      | 7.2471763   | 5.5466137   | 5.844566    | 5.50308365  | 5.487805    | 5.6192703   | 5.29874215  | 5.1464339   |
| "Hormad1"   | 3.5700953   | 3.9958158   | 3.742382    | 3.8785627   | 3.738164    | 3.6014547   | 3.6870053   | 3.753694    |
| "Hoxa10"    | 6.5663195   | 6.91714     | 7.551987    | 7.780914    | 6.603799    | 6.273899    | 7.279804    | 7.6367955   |
| "Hoxa11"    | 2.2917612   | 2.3745413   | 2.3171492   | 2.4686737   | 2.3038368   | 2.2915998   | 2.2630873   | 2.3621812   |
| "Hoxa11as"  | 2.5253735   | 3.0334973   | 2.5218403   | 3.0462358   | 2.53895     | 2.850957    | 2.3624876   | 2.5170023   |
| "Hoxa2"     | 2.5603504   | 2.6486673   | 2.618266    | 2.8147566   | 2.6347651   | 2.540978    | 2.6277761   | 2.7317505   |
| "Hoxa3"     | 2.8997995   | 3.06021775  | 2.979544    | 3.1126211   | 3.14766845  | 2.93534525  | 3.061208    | 3.1157697   |
| "Hoxa4"     | 2.88831255  | 3.0654775   | 2.9928155   | 3.10916985  | 2.99678465  | 2.92764695  | 2.9741225   | 3.26217575  |
| "Hoxa5"     | 4.8857713   | 4.5666127   | 4.595933    | 4.664331    | 5.403766    | 5.0269427   | 4.9823184   | 5.350553    |
| "Hoxa7"     | 2.814036    | 3.261593    | 3.1313195   | 2.933792    | 3.1765635   | 2.952712    | 3.1255865   | 3.1318908   |
| "Hoxa9"     | 5.08402035  | 4.99206265  | 5.8952364   | 5.72521995  | 5.54079115  | 5.3581275   | 6.3830995   | 6.0082473   |
| "Hoxb13"    | 2.5521066   | 2.649502    | 2.5743444   | 2.6518307   | 2.575969    | 2.5468297   | 2.57375     | 2.6369367   |
| "Hoxb4"     | 3.43453365  | 3.51583965  | 3.4728822   | 3.56556855  | 3.4638029   | 3.43927835  | 3.4714331   | 3.54991825  |
| "Hoxb5"     | 2.560813    | 2.6864424   | 2.6107879   | 2.7547522   | 2.6116707   | 2.565277    | 2.6207678   | 2.6834168   |
| "Hoxb6"     | 2.316517    | 2.5032525   | 2.4977975   | 2.543973    | 2.493415    | 2.8217556   | 2.488003    | 2.560005    |
| "Hoxb9"     | 2.1336467   | 2.2215984   | 2.1897085   | 2.2552943   | 2.147634    | 2.161834    | 2.4713326   | 2.2401853   |
| "Hoxc13"    | 2.3837543   | 2.4567726   | 2.4172223   | 2.5139482   | 2.4233088   | 2.3997462   | 2.4177146   | 2.4878464   |
| "Hoxc4"     | 5.9253597   | 6.5583587   | 6.291384    | 6.7828417   | 6.260107    | 6.119039    | 6.7148967   | 6.5251946   |
| "Hoxc5"     | 2.5697803   | 2.681919    | 2.650356    | 2.7512503   | 2.700735    | 2.5549212   | 2.652555    | 2.7347708   |
| "Hoxc6"     | 2.443743267 | 2.529220367 | 2.637392933 | 2.691509367 | 2.7308689   | 2.589522467 | 2.841705333 | 2.8079883   |

|            |             |             |             |             |             |             |             |             |
|------------|-------------|-------------|-------------|-------------|-------------|-------------|-------------|-------------|
| "Hoxc8"    | 3.1542344   | 3.8842504   | 4.8550615   | 4.761563    | 4.864496    | 3.356317    | 4.2982283   | 4.7466154   |
| "Hoxc9"    | 5.863865    | 6.9766893   | 6.508133    | 6.6321573   | 6.3081374   | 6.2577057   | 6.8801007   | 6.5028644   |
| "Hoxd10"   | 3.8536117   | 5.439605    | 5.974882    | 5.405455    | 4.320774    | 4.0072765   | 5.531615    | 5.4906874   |
| "Hoxd12"   | 2.3174548   | 2.395311    | 2.3559155   | 2.4649873   | 2.356627    | 2.319654    | 2.3518693   | 2.4415095   |
| "Hoxd8"    | 7.9426556   | 8.779692    | 9.17171     | 9.068003    | 8.128086    | 8.12999     | 9.297775    | 9.060028    |
| "Hoxd9"    | 7.236734    | 8.467569    | 7.9825897   | 8.292923    | 7.363666    | 7.5337667   | 7.746046    | 8.121141    |
| "Hp"       | 13.712268   | 6.204649    | 9.532523    | 4.8848643   | 9.184179    | 9.088122    | 8.982394    | 7.5580626   |
| "Hp1bp3"   | 9.612734    | 9.929942    | 9.6772375   | 9.479646    | 10.143466   | 10.335284   | 9.776467    | 9.68863     |
| "Hpcal1"   | 6.436216    | 5.4147377   | 5.089618    | 4.2109365   | 5.59896     | 6.9487104   | 5.504202    | 5.0294175   |
| "Hpd"      | 11.467001   | 2.3707335   | 3.9349964   | 2.4621875   | 4.0227957   | 2.5897138   | 2.3893328   | 2.8435748   |
| "Hpgd"     | 7.442736    | 4.197915    | 6.355598    | 5.6216516   | 6.851272    | 6.709085    | 5.3588915   | 6.423707    |
| "Hpgds"    | 2.1196086   | 2.1543002   | 2.1360035   | 2.1978326   | 2.124378    | 2.0852144   | 2.3598552   | 2.2066555   |
| "Hpn"      | 7.6269712   | 4.4183207   | 4.236388    | 5.067956    | 4.4438276   | 3.555513    | 4.2066073   | 4.592416    |
| "Hprt"     | 9.109086    | 8.907037    | 8.932497    | 8.751808    | 9.101278    | 9.258174    | 9.441898    | 8.707744    |
| "Hps3"     | 5.3605127   | 5.4449334   | 5.176018    | 4.9351354   | 5.9226265   | 6.4088845   | 5.325447    | 5.231149    |
| "Hps4"     | 6.9894366   | 5.698133    | 5.7492003   | 4.829649    | 6.0581145   | 5.662623    | 6.0365043   | 5.707154    |
| "Hpx"      | 14.765593   | 2.981055    | 8.90848     | 3.0385964   | 6.9423065   | 2.7331488   | 3.0288782   | 5.8089037   |
| "Hr"       | 4.17030125  | 4.94277335  | 4.2348762   | 4.56308725  | 4.4365209   | 4.35719635  | 3.87489045  | 4.2393026   |
| "Hras1"    | 8.2411355   | 8.07259735  | 8.7521695   | 8.6866642   | 7.9667133   | 7.4153185   | 8.4456043   | 8.3300125   |
| "Hrasls"   | 6.644792    | 6.692669    | 7.322656    | 7.763346    | 6.7733426   | 5.858268    | 7.4660363   | 7.172221    |
| "Hrc"      | 11.124756   | 11.481658   | 11.8256235  | 11.564576   | 11.672691   | 10.893937   | 11.503296   | 11.616822   |
| "Hrg"      | 10.600713   | 2.2181525   | 2.4883244   | 2.2620797   | 2.3468463   | 2.170379    | 2.2052102   | 2.2646502   |
| "Hrh2"     | 2.6373415   | 2.6565828   | 2.6481254   | 2.7908564   | 2.6499965   | 2.5746138   | 2.6471384   | 2.702657    |
| "Hrh3"     | 2.4581223   | 2.5697534   | 2.51566     | 2.610623    | 2.5156524   | 2.4819613   | 2.4748342   | 2.6028073   |
| "Hrnr"     | 2.9766564   | 2.6356628   | 3.7469606   | 2.6991706   | 2.5828593   | 2.5173328   | 2.5667477   | 2.6823943   |
| "Hrsp12"   | 10.44891    | 5.80417     | 7.147718    | 7.2331266   | 6.389597    | 5.6255126   | 6.6488123   | 7.075875    |
| "Hsl1bp3"  | 2.6574525   | 2.6519507   | 2.5076109   | 2.67359615  | 2.8154004   | 2.637233    | 2.68391565  | 2.75212015  |
| "Hs2st1"   | 4.4319551   | 4.4983452   | 5.0916835   | 5.0537629   | 4.6702086   | 4.0927004   | 4.969462    | 5.0092447   |
| "Hs3st1"   | 2.3424935   | 2.4589977   | 2.752447    | 2.5011735   | 2.4577632   | 3.4108229   | 2.4590344   | 2.503857    |
| "Hs3st3a1" | 2.3543088   | 2.5699122   | 2.3940027   | 2.4509654   | 2.3954322   | 2.3565145   | 2.379289    | 2.4506989   |
| "Hs3st3b1" | 2.579627    | 2.6402588   | 2.6079183   | 2.6816294   | 2.6110864   | 2.5828998   | 2.6045907   | 2.6631892   |
| "Hs6st1"   | 6.351582    | 6.0161114   | 5.610625    | 5.967508    | 5.756345    | 5.2891026   | 5.734537    | 5.6267843   |
| "Hs6st2"   | 3.2702194   | 3.468105433 | 3.6383219   | 3.316447    | 3.0467549   | 2.931363133 | 3.587848    | 3.502518867 |
| "Hsbp1"    | 10.3292835  | 10.39526675 | 10.613815   | 10.4676645  | 10.262771   | 10.134032   | 10.5210495  | 10.528219   |
| "Hscb"     | 6.15803     | 6.4304824   | 6.187252    | 6.035749    | 6.171828    | 5.188326    | 6.6822767   | 5.762914    |
| "Hsd11b1"  | 10.659297   | 7.586078    | 7.1211576   | 7.694013    | 8.315698    | 9.830575    | 9.132472    | 7.7767816   |
| "Hsd11b2"  | 2.370709    | 2.5697012   | 2.508608    | 2.637299    | 2.5120437   | 2.4960077   | 2.5057898   | 2.5840983   |
| "Hsd17b1"  | 2.8429682   | 2.8817816   | 2.8599045   | 2.924954    | 2.8619235   | 2.8406205   | 2.859096    | 2.9264839   |
| "Hsd17b10" | 9.412612    | 9.6345145   | 9.337126    | 9.3967285   | 9.7293885   | 9.666025    | 9.768489    | 9.487188    |
| "Hsd17b11" | 6.1211444   | 5.582004    | 5.4038412   | 5.28380015  | 5.85082305  | 6.228993    | 5.55086565  | 5.424032    |
| "Hsd17b12" | 7.8315745   | 5.75205025  | 7.46893625  | 6.34125665  | 7.585969    | 8.26618915  | 8.8568205   | 7.0178432   |
| "Hsd17b2"  | 7.3621693   | 2.5190065   | 2.4606664   | 2.540296    | 2.4607303   | 2.3512814   | 2.454391    | 2.560981    |
| "Hsd17b3"  | 2.4432075   | 2.539633    | 2.6820655   | 2.602745    | 2.4982173   | 2.4572139   | 2.490132    | 2.5834894   |
| "Hsd17b4"  | 9.4672745   | 9.417397    | 9.5880845   | 9.514723    | 10.2578215  | 9.795558    | 9.6951955   | 10.0515455  |
| "Hsd17b6"  | 4.788437    | 2.0569282   | 2.0345187   | 2.101696    | 2.034379    | 2.0105233   | 2.0329967   | 2.0968707   |
| "Hsd17b7"  | 4.2994258   | 3.54887675  | 2.330182    | 2.62710335  | 2.33194205  | 2.30541585  | 2.16374755  | 2.5086777   |
| "Hsd3b2"   | 2.69203     | 2.649015    | 2.6921635   | 2.6921794   | 2.5910687   | 2.5271323   | 2.5742428   | 2.6943395   |
| "Hsd3b3"   | 2.8620806   | 2.4648826   | 2.4579341   | 2.506667    | 2.4554996   | 2.3680766   | 2.3931158   | 2.5069296   |
| "Hsd3b7"   | 6.862212    | 3.9339862   | 5.6983066   | 4.7082133   | 5.774244    | 6.159045    | 6.3056083   | 5.3017426   |
| "Hsd12"    | 8.3311885   | 8.16787745  | 8.2059098   | 8.8142245   | 9.1924095   | 8.5371965   | 8.39671375  | 9.089424    |
| "Hsf1"     | 6.83736     | 7.1931195   | 6.8866577   | 7.1552954   | 6.6533265   | 6.802349    | 7.3799343   | 6.970138    |
| "Hsf2"     | 6.3142576   | 6.867739    | 6.4764752   | 6.624227    | 6.407828    | 6.828603    | 5.883916    | 6.829232    |
| "Hsf4"     | 2.5591114   | 2.6931617   | 2.622443    | 2.6538174   | 2.6286995   | 2.576769    | 2.6161249   | 2.704395    |
| "Hsp90aa1" | 8.941227833 | 8.200532667 | 8.283072    | 8.2665768   | 8.487723567 | 9.057100333 | 8.880302767 | 8.504482    |
| "Hsp90ab1" | 13.100878   | 13.049662   | 12.79374    | 12.6709875  | 12.957796   | 13.067037   | 13.3345505  | 12.8566725  |
| "Hsp90b1"  | 10.48412    | 9.3888575   | 10.2310395  | 9.980322    | 10.0884595  | 10.052537   | 10.4801625  | 10.2622065  |
| "Hspa12b"  | 4.340046    | 4.2840605   | 4.477687    | 4.802844    | 4.8777466   | 5.2058563   | 4.59369     | 5.04321     |
| "Hspa14"   | 5.19193815  | 5.5246795   | 5.66956225  | 5.73346375  | 5.7424765   | 5.5844637   | 5.84939115  | 5.6475006   |
| "Hspa1a"   | 4.9208217   | 4.3885546   | 4.5250425   | 4.9012427   | 6.1161575   | 4.9249263   | 5.125197    | 4.971506    |
| "Hspa1b"   | 7.206958133 | 5.977333667 | 7.604625667 | 7.3559605   | 8.442519433 | 7.5187064   | 8.061831433 | 7.248494433 |
| "Hspa1l"   | 6.341982    | 5.9793973   | 6.117324    | 6.064045    | 6.896645    | 5.543728    | 6.774721    | 6.1263523   |
| "Hspa2"    | 6.502405    | 5.108819    | 5.1813526   | 5.8805366   | 6.1907053   | 5.5264964   | 5.843591    | 5.7294555   |
| "Hspa4"    | 7.704703067 | 7.708077267 | 8.032652067 | 8.247393433 | 7.592068567 | 7.8621428   | 7.959803833 | 8.334145567 |
| "Hspa4l"   | 3.38650485  | 2.6560221   | 3.2310084   | 3.22287025  | 3.23202825  | 2.8882029   | 3.51459635  | 3.1897633   |
| "Hspa5"    | 11.906281   | 11.097326   | 11.6030945  | 11.35828625 | 11.5698875  | 11.461681   | 11.546876   | 11.4849385  |
| "Hspa8"    | 10.337629   | 10.53933943 | 10.3929625  | 10.69001668 | 10.64164518 | 11.17988913 | 11.211974   | 11.00875613 |
| "Hspa9"    | 8.3465108   | 8.333403533 | 8.326810367 | 8.4698644   | 8.472429333 | 8.3668576   | 8.404478633 | 8.5562119   |
| "Hspb1"    | 13.1943     | 13.1781865  | 11.7631925  | 11.3064605  | 12.5815575  | 13.3965425  | 12.3593565  | 11.4873125  |
| "Hspb11"   | 4.943463    | 4.6314272   | 4.89175685  | 5.1868925   | 4.76550215  | 4.5599849   | 5.33282935  | 5.1446288   |
| "Hspb2"    | 9.677788    | 9.441528    | 10.271652   | 10.108506   | 9.395125    | 8.901145    | 10.203563   | 9.945644    |
| "Hspb3"    | 8.619328    | 8.143531    | 9.974347    | 9.890716    | 8.312609    | 7.434051    | 9.704321    | 9.331963    |
| "Hspb7"    | 11.19116067 | 10.49763833 | 8.659575667 | 9.522358667 | 10.968586   | 10.8631     | 10.55016333 | 9.7229075   |
| "Hspb8"    | 8.629490533 | 8.4594892   | 8.438102667 | 8.6679769   | 8.075284    | 8.331204    | 9.063120433 | 8.392055133 |
| "Hspbp1"   | 5.759636    | 5.774378    | 5.6859546   | 5.8670697   | 5.718485    | 5.844354    | 5.767175    | 5.8157077   |
| "Hspd1"    | 11.3302     | 11.185816   | 11.415417   | 11.338142   | 11.29942    | 11.262838   | 11.46015    | 11.403504   |
| "Hspe1"    | 10.406225   | 10.336112   | 10.3289375  | 10.3345845  | 10.29295325 | 10.170438   | 10.652382   | 10.332813   |
| "Hspg2"    | 6.7452323   | 6.6791687   | 7.33621065  | 7.278301    | 7.16271615  | 6.87130415  | 7.07464055  | 7.15996785  |
| "Hsph1"    | 9.0766285   | 8.7834205   | 7.9825585   | 8.559603    | 8.742632    | 9.026834    | 8.610252    | 8.735955    |
| "Htati2"   | 7.1814766   | 4.060738    | 5.474031    | 4.879679    | 5.8294697   | 5.7593083   | 6.9599113   | 5.074898    |
| "Htatsf1"  | 6.818288467 | 7.331186667 | 7.098426567 | 7.202548667 | 6.881528367 | 6.871471667 | 7.086804333 | 7.128964433 |
| "Htr1a"    | 2.3069475   | 2.3656015   | 2.3447764   | 2.4719088   | 2.3465006   | 2.305204    | 2.3123448   | 2.4228914   |

|            |             |             |             |             |             |             |             |             |
|------------|-------------|-------------|-------------|-------------|-------------|-------------|-------------|-------------|
| "Htr1b"    | 2.65635     | 2.8895714   | 2.6730244   | 2.6939394   | 2.6729066   | 2.646956    | 2.6724756   | 2.7167668   |
| "Htr1f"    | 2.3751597   | 2.4521914   | 2.4078236   | 2.5164137   | 2.4067278   | 2.380208    | 2.4023218   | 2.5036306   |
| "Htr2c"    | 2.3361225   | 2.4117668   | 2.3639154   | 2.456914    | 2.3666592   | 2.3327343   | 2.3630028   | 2.4507072   |
| "Htr4"     | 2.4122736   | 2.459064    | 2.4285526   | 2.5226564   | 2.4348226   | 2.3883176   | 2.4330478   | 2.511233    |
| "Htra1"    | 8.6337135   | 10.284904   | 9.739129    | 8.7218305   | 9.6158895   | 10.2472615  | 8.7550125   | 8.64816125  |
| "Htra2"    | 6.49173595  | 6.701456    | 6.5031032   | 6.6180945   | 6.66219565  | 6.5982073   | 6.7844235   | 6.64707785  |
| "Htra3"    | 6.986264    | 6.72679535  | 7.1431788   | 6.3986115   | 8.27838375  | 8.154604    | 7.012231    | 6.5472473   |
| "Htt"      | 3.5086942   | 3.510637    | 3.6038783   | 3.5410643   | 3.510637    | 3.5244634   | 3.252795    | 3.5417867   |
| "Hus1"     | 3.81744565  | 4.31448815  | 4.2075934   | 4.4858875   | 4.05894265  | 3.99945965  | 4.30259475  | 4.5466837   |
| "Huwe1"    | 5.2698718   | 5.729373467 | 5.6027895   | 5.608376667 | 5.470698733 | 5.722232567 | 5.404995333 | 5.489611433 |
| "Hvcn1"    | 2.268862    | 2.3512182   | 2.3044088   | 2.3605225   | 2.2918868   | 4.957855    | 2.531143    | 2.3601313   |
| "Hyal1"    | 5.013726    | 2.762052    | 3.7201715   | 3.7560444   | 3.8533707   | 3.6436708   | 3.685514    | 3.6843681   |
| "Hyi"      | 3.4789324   | 3.2230623   | 3.094242    | 3.1804862   | 3.1016824   | 3.071654    | 3.125232    | 3.1996868   |
| "Hyou1"    | 2.486018367 | 2.497171633 | 2.449851933 | 2.804113867 | 2.4428169   | 2.386374633 | 2.557635933 | 2.547336    |
| "lah1"     | 8.86767     | 5.659809    | 6.7504888   | 5.65311     | 7.234       | 7.149451    | 7.184494    | 6.812613    |
| "lapp"     | 2.584566525 | 2.7026989   | 2.63894835  | 2.754943675 | 2.646110475 | 2.605364425 | 2.633935825 | 2.73198165  |
| "lars"     | 9.17824175  | 9.870595    | 9.368062    | 9.4666575   | 9.3188085   | 9.264775    | 9.030293    | 9.3860345   |
| "lars2"    | 8.634686    | 8.847475    | 8.848958    | 8.875808    | 9.076901    | 8.574624    | 8.941017    | 9.027311    |
| "lbsp"     | 2.77191075  | 2.9508388   | 2.82943705  | 2.98514855  | 2.8754842   | 2.81630675  | 2.85364425  | 2.9888092   |
| "lbtkt"    | 5.4486009   | 5.53628115  | 5.8923742   | 6.07862335  | 5.6201612   | 5.74849455  | 5.35743575  | 6.0383643   |
| "lca1"     | 2.3602498   | 2.4179666   | 2.2624414   | 2.49491     | 2.284047    | 2.3778198   | 2.384548    | 2.4668615   |
| "lcam1"    | 7.77106     | 4.452224    | 4.4506865   | 4.603326    | 4.991786    | 6.3857694   | 5.8112736   | 4.6399107   |
| "lcam2"    | 6.3007307   | 5.6325836   | 6.5812507   | 6.5915904   | 6.481488    | 7.082225    | 6.547363    | 6.6215262   |
| "lcam4"    | 2.3246565   | 2.3080916   | 2.4006042   | 2.5144186   | 2.3960886   | 2.3738048   | 2.8123918   | 2.465302    |
| "lck"      | 2.312059    | 2.7949252   | 2.3208814   | 2.2609086   | 2.322592    | 2.3620949   | 2.2773259   | 2.2899394   |
| "lcm1"     | 6.494672    | 6.769222    | 6.7517824   | 6.591791    | 6.417939    | 6.322375    | 6.6892734   | 6.2508154   |
| "lcos"     | 1.8946383   | 1.9410945   | 1.919672    | 1.9958147   | 1.9328036   | 2.4890141   | 1.927402    | 1.9883648   |
| "lcos1"    | 2.47060895  | 2.56544005  | 2.5380631   | 2.6119273   | 2.5383066   | 2.51255     | 2.5338728   | 2.6326899   |
| "lct1"     | 9.950761    | 9.882406    | 10.183038   | 10.089129   | 9.860098    | 9.513491    | 10.277217   | 9.982577    |
| "ld1"      | 8.617118    | 8.463715    | 8.080431    | 7.665271    | 8.608913    | 9.332762    | 9.396999    | 7.9592752   |
| "ld2"      | 6.114843333 | 4.506107633 | 5.202451933 | 4.812412833 | 4.640476233 | 5.056394967 | 4.818629567 | 4.919337433 |
| "ld3"      | 9.186196    | 8.463285    | 8.425981    | 7.967552    | 8.588455    | 8.949028    | 8.936266    | 8.364069    |
| "ld4"      | 3.3404311   | 3.3074282   | 5.27332805  | 4.0315132   | 3.63511575  | 3.4025429   | 3.79875785  | 4.1202431   |
| "lde"      | 7.515800825 | 8.066864575 | 8.025035375 | 7.964707775 | 7.552993425 | 7.816198975 | 7.65102135  | 7.86745075  |
| "ldh1"     | 8.671909    | 7.3191225   | 9.1041935   | 8.79508275  | 9.8361255   | 8.38852385  | 9.6520845   | 9.1434905   |
| "ldh2"     | 10.658281   | 9.323334    | 9.684356    | 10.067261   | 10.343632   | 9.616463    | 10.685039   | 11.176431   |
| "ldh3a"    | 10.17415633 | 10.862016   | 11.11849867 | 11.55591333 | 10.94097167 | 10.46636833 | 10.31240333 | 11.317137   |
| "ldh3b"    | 10.0101695  | 9.56846275  | 10.0743517  | 10.05161015 | 10.408172   | 10.2604335  | 10.71100975 | 10.153482   |
| "ldh3g"    | 12.318167   | 12.469666   | 12.70589025 | 12.8966425  | 12.813079   | 12.6930855  | 12.5234415  | 12.853812   |
| "ldnk"     | 6.9347153   | 4.2192154   | 6.056308    | 5.9119997   | 6.600576    | 6.255558    | 6.8387537   | 5.900246    |
| "lds"      | 2.6771573   | 2.8698912   | 2.743929925 | 2.887108925 | 2.7765475   | 2.6961236   | 2.74080195  | 2.851946    |
| "ldua"     | 3.495860667 | 3.726301567 | 3.4096871   | 3.462862433 | 3.691367033 | 3.5125257   | 3.870712133 | 3.6861597   |
| "ler2"     | 7.912792    | 6.151629    | 6.309979    | 6.30297     | 5.963464    | 6.43148     | 6.9017434   | 6.1005936   |
| "ler3"     | 6.392104    | 7.2837443   | 6.1513357   | 6.1598153   | 7.5569453   | 7.484755    | 6.918499    | 6.3177524   |
| "ler3ip1"  | 8.7730555   | 8.67699     | 9.280421    | 9.4475595   | 8.759573    | 8.5103415   | 9.3281345   | 9.362514    |
| "ler5"     | 4.165508267 | 4.829021933 | 4.447358167 | 4.290316467 | 4.3954412   | 5.231600733 | 4.174033733 | 4.203865667 |
| "lffo1"    | 3.4384242   | 3.66676455  | 3.73173265  | 3.7210851   | 3.77706235  | 3.61029135  | 4.12186055  | 3.45470145  |
| "lffo2"    | 3.7120435   | 2.6369147   | 3.0785356   | 2.5199733   | 2.799689    | 3.244779    | 3.0881028   | 2.5899415   |
| "lfi202b"  | 2.6695065   | 2.8178225   | 2.725202    | 2.8751073   | 2.7388725   | 2.6690707   | 2.715724    | 2.85167     |
| "lfi204"   | 6.6909223   | 6.32015835  | 6.0608662   | 6.56131175  | 6.905563    | 7.25375875  | 6.8929565   | 6.730419    |
| "lfi205"   | 9.989058    | 9.394409    | 9.512714    | 8.844481    | 10.555071   | 10.561243   | 10.283281   | 9.659788    |
| "lfi2712a" | 8.428789    | 7.1635404   | 9.504579    | 8.034882    | 11.524619   | 11.909675   | 12.362504   | 8.756154    |
| "lfi2712b" | 3.2196066   | 3.13459     | 2.9872732   | 3.198072    | 3.046868    | 2.9776573   | 3.1455302   | 3.018018    |
| "lfi30"    | 8.904883    | 7.7256594   | 7.4373765   | 6.951488    | 7.8747473   | 8.530769    | 8.179788    | 6.9348054   |
| "lfi35"    | 6.474438    | 6.5321155   | 6.515159    | 6.4183664   | 6.6747994   | 7.067314    | 6.8355384   | 6.2823153   |
| "lfi44"    | 3.2040918   | 3.2061677   | 3.2177784   | 3.2771869   | 3.030189    | 3.173524    | 4.4705553   | 3.4004402   |
| "lfi47"    | 5.782041    | 4.414776    | 5.274707    | 4.987637    | 5.2564707   | 6.6435337   | 6.6072164   | 5.35159     |
| "lfihi1"   | 6.069658    | 4.7943506   | 6.3747315   | 6.124962    | 6.140884    | 5.651543    | 7.3635955   | 6.2984695   |
| "lfit1"    | 3.8507173   | 3.3507671   | 3.8113549   | 3.8648334   | 3.844753    | 3.4590094   | 5.5445695   | 4.2892895   |
| "lfit2"    | 5.608823    | 4.809206    | 5.2885666   | 6.1391973   | 5.614192    | 5.8352365   | 6.251766    | 6.401043    |
| "lfit3"    | 6.263657    | 5.22522     | 6.3239226   | 6.718972    | 5.7081366   | 5.223637    | 8.192405    | 7.0214896   |
| "lfitm1"   | 7.0011277   | 5.5796165   | 4.5927577   | 4.6283293   | 4.580357    | 6.9559813   | 6.170617    | 5.141857    |
| "lfitm2"   | 9.040564    | 7.0047197   | 7.8678665   | 7.409856    | 7.8444614   | 7.9702888   | 8.1861      | 7.7335753   |
| "lfitm3"   | 11.032713   | 8.57473     | 10.002204   | 9.577573    | 9.753323    | 9.464203    | 10.529007   | 9.799589    |
| "lfitm6"   | 5.4332857   | 2.4836493   | 3.4289708   | 2.541585    | 3.3318934   | 6.709591    | 4.2374086   | 2.5352802   |
| "lfna1"    | 2.3626652   | 2.4418032   | 2.3927882   | 2.5222876   | 2.3953707   | 2.351235    | 2.3893197   | 2.4359853   |
| "lfna2"    | 2.4066055   | 2.505722    | 2.4462852   | 2.5703506   | 2.4544077   | 2.341724    | 2.4123433   | 2.5678725   |
| "lfna5"    | 2.371044    | 2.4614885   | 2.3953755   | 2.5276186   | 2.4023287   | 2.3564897   | 2.3939023   | 2.4979517   |
| "lfna9"    | 2.4948785   | 2.5663283   | 2.5445836   | 2.6774948   | 2.5458295   | 2.5145962   | 2.5447485   | 2.66127     |
| "lfnab"    | 2.5064113   | 2.5741858   | 2.5132048   | 2.6409307   | 2.5169709   | 2.49878     | 2.5120666   | 2.6236424   |
| "lfnar1"   | 5.5855446   | 5.1979733   | 5.1743436   | 5.2325783   | 5.622028    | 5.791364    | 5.4646378   | 5.0795383   |
| "lfnar2"   | 5.83969     | 4.9236926   | 5.41398225  | 4.9749901   | 5.4722932   | 6.0409813   | 5.5674841   | 5.24144285  |
| "lfng"     | 2.3678727   | 2.4886065   | 2.4532185   | 2.5671225   | 2.459773    | 2.429094    | 2.4502172   | 2.540184    |
| "lfngr1"   | 8.264712    | 7.981844    | 7.655992    | 7.7198367   | 8.696619    | 8.995757    | 8.11127     | 8.152215    |
| "lfngr2"   | 6.2230405   | 5.816793    | 6.9101345   | 6.7727965   | 6.0882723   | 5.8337865   | 6.79803715  | 6.7952847   |
| "lfrd1"    | 11.800606   | 12.220183   | 9.235168    | 9.4169035   | 11.214171   | 11.768001   | 9.44837     | 9.647775    |
| "lfrd2"    | 6.9574895   | 7.593871    | 7.420095    | 7.615022    | 7.087827    | 7.0113516   | 7.2300777   | 7.3696575   |
| "lft122"   | 4.6134243   | 4.4668818   | 5.1047316   | 5.02988     | 3.071912    | 2.7588212   | 3.7074566   | 3.4010277   |
| "lft140"   | 3.77748     | 4.232002    | 4.714061    | 4.3113074   | 4.213215    | 4.579844    | 4.2080793   | 4.3407984   |
| "lft172"   | 6.081011    | 6.1440144   | 6.082946    | 6.154479    | 6.081742    | 5.6001406   | 6.1546893   | 6.2742333   |
| "lft20"    | 7.501262    | 6.732448    | 8.141852    | 7.3525023   | 7.101747    | 7.403091    | 7.5987678   | 7.36546     |

|              |             |             |             |             |             |             |             |             |
|--------------|-------------|-------------|-------------|-------------|-------------|-------------|-------------|-------------|
| "lft27"      | 6.589826533 | 6.473102333 | 7.4174079   | 7.891020067 | 6.375033467 | 5.3660072   | 7.3919591   | 7.482155133 |
| "lft46"      | 7.1922727   | 7.37453     | 6.939728    | 7.165854    | 7.2258635   | 7.022764    | 7.1015844   | 6.8982496   |
| "lft57"      | 5.2990856   | 5.8338804   | 5.133555    | 4.755695    | 5.4695625   | 5.1276326   | 5.35021     | 5.236101    |
| "lft74"      | 6.5058975   | 7.1565433   | 6.0402384   | 6.875316    | 6.5583577   | 6.6870947   | 6.724731    | 6.8065443   |
| "lft80"      | 2.91462445  | 2.93577955  | 3.0160606   | 3.0413464   | 2.75612805  | 3.00129485  | 2.89824175  | 3.44913325  |
| "lft81"      | 4.9001225   | 3.3280048   | 3.2515404   | 4.20209435  | 4.32384885  | 3.9705001   | 4.0669585   | 4.14403925  |
| "lft88"      | 4.6988254   | 5.017245    | 4.7899594   | 4.8433766   | 4.8620462   | 4.697528    | 4.6048536   | 4.8457236   |
| "lgbp1"      | 6.121440525 | 6.15288285  | 6.06217955  | 6.13279935  | 6.196407325 | 6.159885625 | 6.1718395   | 6.1238656   |
| "lgdcc3"     | 2.4900856   | 2.5447564   | 2.4962268   | 2.5402725   | 2.4981728   | 2.4762306   | 2.458696    | 2.5407472   |
| "lgdcc4"     | 8.11043735  | 6.9911805   | 8.89942075  | 8.7435855   | 7.74048     | 6.72355915  | 9.177165    | 8.45733115  |
| "lgl1"       | 9.337616667 | 7.464823    | 7.487394433 | 6.576456567 | 6.424239    | 6.7930969   | 7.119694867 | 6.622686567 |
| "lgl1r"      | 4.2215798   | 5.1809772   | 4.064424    | 3.9935875   | 4.442402    | 4.19591515  | 3.8909302   | 3.7992743   |
| "lgl2"       | 6.1696544   | 5.2964363   | 5.4986555   | 5.191577    | 5.42937185  | 5.22001175  | 6.0094487   | 5.5030221   |
| "lgl2as"     | 2.511156    | 2.6071408   | 2.5697715   | 2.6574268   | 2.5906768   | 2.5570612   | 2.5797238   | 2.6481953   |
| "lgl2bp1"    | 2.562901    | 2.635789    | 2.5944772   | 2.6898127   | 2.5910258   | 2.5645099   | 2.5747685   | 2.6631827   |
| "lgl2bp2"    | 2.558977    | 2.5132005   | 2.4881372   | 2.522782    | 2.5029786   | 2.4919174   | 2.4978783   | 2.5100653   |
| "lgl2bp3"    | 2.479869825 | 2.703591925 | 2.546249425 | 2.6450242   | 2.5449972   | 2.497739975 | 2.525622125 | 2.6361574   |
| "lgl2r"      | 8.2307688   | 7.86218815  | 8.6523795   | 8.5044425   | 8.2893337   | 8.022704    | 8.5923485   | 8.487155    |
| "lgfals"     | 2.8273528   | 1.9509218   | 1.9702824   | 1.9023945   | 1.9373429   | 1.9222155   | 2.0623837   | 1.7984961   |
| "lgbp1"      | 14.038539   | 2.072088    | 2.072726    | 2.1181617   | 2.0561755   | 2.02945     | 2.0533066   | 2.1096728   |
| "lgbp2"      | 5.7757196   | 2.8820145   | 2.9036133   | 2.9472842   | 2.8439069   | 2.784947    | 2.8396282   | 2.9690888   |
| "lgbp3"      | 9.681699    | 10.833497   | 8.273198    | 7.36109     | 10.00934    | 10.74151    | 8.694755    | 7.684231    |
| "lgbp4"      | 8.55665426  | 7.1463168   | 7.3177612   | 6.58827758  | 8.03198188  | 8.20997334  | 7.237379    | 6.51781036  |
| "lgbp5"      | 6.13099035  | 6.0694236   | 7.8564515   | 7.747349    | 5.99952885  | 5.83351435  | 7.320833    | 7.64747055  |
| "lgbp6"      | 8.576935    | 7.9740243   | 9.816693    | 8.954826    | 9.61403     | 9.083857    | 8.720023    | 9.152582    |
| "lgbp7"      | 7.65166235  | 7.156913    | 8.109972    | 7.5637948   | 7.921459    | 7.895203    | 7.9292743   | 7.6785228   |
| "lgh-VJ558"  | 3.165329778 | 2.727487256 | 2.631830022 | 2.735417389 | 2.662208356 | 5.398486689 | 2.940911244 | 2.679224689 |
| "lghg"       | 2.564949733 | 2.660132767 | 2.605382633 | 2.745575667 | 2.627964867 | 3.548426567 | 2.621811933 | 2.706321667 |
| "lghg3"      | 3.2331628   | 3.34778135  | 3.3019456   | 3.42239915  | 3.30519105  | 4.3501189   | 3.30195775  | 3.38144255  |
| "lghm"       | 2.666118567 | 2.788988544 | 3.207548911 | 3.514057344 | 3.343644056 | 4.4578994   | 3.2321248   | 3.108904311 |
| "lghmbp2"    | 2.6621921   | 2.9240852   | 2.687945867 | 2.742004967 | 2.877868933 | 2.673206267 | 2.705021    | 2.726661633 |
| "lghv14-2"   | 2.5296266   | 2.620112    | 2.5856006   | 2.768252    | 2.596707    | 8.13724     | 2.5936368   | 2.6936026   |
| "lgi"        | 2.5483387   | 2.5337353   | 2.530188    | 2.5846686   | 2.5478036   | 9.040305    | 2.5437174   | 2.6014235   |
| "lgi-V1"     | 2.4088445   | 2.5227308   | 2.4707367   | 2.5900896   | 2.4694085   | 2.5866277   | 2.4637067   | 2.5632672   |
| "lgi-V21"    | 2.756332    | 2.929997    | 2.8130486   | 2.9875083   | 2.8228598   | 2.7447717   | 2.813912    | 2.9284332   |
| "lgi-V28"    | 3.026745217 | 2.463014067 | 2.4728198   | 2.4317146   | 2.449121817 | 6.591685883 | 2.581149583 | 2.5217174   |
| "lgi"        | 2.462108067 | 2.5223934   | 2.502748967 | 2.583450567 | 2.507166633 | 2.560775633 | 2.503127567 | 2.5614515   |
| "lgkv1-117"  | 2.6082444   | 2.7376757   | 2.6478155   | 2.7891974   | 2.6622682   | 2.5953884   | 2.6600924   | 2.7313483   |
| "lgkv1-135"  | 2.383586    | 2.52941     | 2.4226537   | 2.5331523   | 2.4231138   | 2.3889627   | 2.4209118   | 2.525558    |
| "lgkv14-111" | 2.6319518   | 2.7812376   | 2.7129939   | 2.7884564   | 2.7223492   | 2.8935094   | 2.7389584   | 2.838831    |
| "lgkv15-103" | 2.4621868   | 2.5643167   | 2.4990005   | 2.6096735   | 2.508449    | 2.4606438   | 2.5000443   | 2.5898318   |
| "lgkv19-93"  | 2.4788268   | 2.6928706   | 2.525524    | 2.5782232   | 2.5004852   | 2.463334    | 2.4763663   | 2.5686944   |
| "lgkv4-55"   | 2.4926329   | 2.6116083   | 2.5338526   | 2.6613803   | 2.53588     | 2.4845686   | 2.531999    | 2.6201925   |
| "lgkv4-68"   | 2.3995328   | 2.4939628   | 2.4428494   | 2.5573301   | 2.4444077   | 2.4170172   | 2.437512    | 2.5296912   |
| "lgkv4-72"   | 2.652014    | 2.7521532   | 2.708357    | 2.8151686   | 2.7076948   | 2.6497612   | 2.6900108   | 2.8013458   |
| "lgkv5-39"   | 2.6903737   | 2.8635664   | 2.7736645   | 2.8925745   | 2.7753263   | 2.7507906   | 2.7628393   | 2.8778555   |
| "lgkv6-14"   | 2.4139926   | 2.513302    | 2.4570763   | 2.5776162   | 2.4515817   | 4.304564    | 2.438809    | 2.563473    |
| "lgkv8-30"   | 2.6565204   | 2.8640656   | 2.6928883   | 2.797305    | 2.689704    | 7.5058208   | 2.6944704   | 2.787057    |
| "lgkv9-120"  | 2.693933    | 2.8580449   | 2.7865715   | 2.9297278   | 2.799326    | 2.7156389   | 2.7758799   | 2.903396    |
| "lglc1"      | 2.5726838   | 2.618344    | 2.5845768   | 2.6647224   | 2.5827913   | 4.4521675   | 2.5846593   | 2.6485505   |
| "lgl1"       | 2.4173908   | 2.5298      | 2.4645119   | 2.5854082   | 2.4701266   | 2.4225426   | 2.4695225   | 2.5256448   |
| "lglv1"      | 2.5665028   | 2.78297185  | 2.654891    | 2.7790686   | 2.8669318   | 4.1538582   | 2.6540451   | 2.7375761   |
| "lgsf5"      | 3.2439003   | 2.2602482   | 2.2304062   | 2.3174727   | 2.2364879   | 2.199893    | 2.2329443   | 2.310208    |
| "lgsf6"      | 4.5553784   | 3.0137954   | 2.9543786   | 3.0953999   | 2.9828398   | 3.2477589   | 3.0889175   | 3.0173936   |
| "lgsf8"      | 3.36142     | 3.3307426   | 3.3101425   | 3.3464315   | 3.706466    | 3.2583694   | 3.3386366   | 3.1750193   |
| "lgsf9"      | 2.4381971   | 2.4472806   | 2.4403079   | 2.4963183   | 2.4385016   | 2.351084    | 2.4356198   | 2.4895263   |
| "lgtp"       | 6.9256024   | 5.447562    | 7.220866    | 7.160365    | 6.2687664   | 6.1862326   | 8.858388    | 7.2435036   |
| "ligp1"      | 8.8633825   | 5.866296    | 7.5062105   | 7.782455    | 6.9382785   | 6.5752245   | 9.4056675   | 7.78700925  |
| "ligp1b"     | 2.5202425   | 2.7721715   | 2.5911763   | 2.688275    | 2.605892    | 2.5352168   | 2.5887718   | 2.668526    |
| "lk"         | 10.0004725  | 10.5060595  | 9.880206    | 10.00057525 | 10.33901    | 10.31605975 | 9.92923     | 10.073764   |
| "lkbip"      | 4.607477    | 4.9764843   | 6.5965405   | 6.123116    | 5.4059343   | 5.2345243   | 5.586773    | 6.384368    |
| "lkbkap"     | 6.285519    | 6.63916025  | 6.462542    | 6.4579139   | 6.37701625  | 6.34546265  | 5.79708515  | 6.3870241   |
| "lkbkb"      | 3.875442575 | 3.882221275 | 3.84948365  | 3.878751    | 3.8493201   | 3.9817692   | 3.88918025  | 3.907386475 |
| "lkbke"      | 2.9742293   | 2.4217954   | 2.413327    | 2.491589    | 2.4519057   | 2.640739    | 2.4147797   | 2.4919353   |
| "lkbkg"      | 4.605800933 | 4.767166    | 4.545719167 | 4.696657767 | 4.906446367 | 5.003865633 | 4.6509453   | 4.646861967 |
| "lkzf1"      | 2.2252216   | 2.6338615   | 2.4069219   | 2.2922306   | 2.2520514   | 2.1897073   | 2.2478774   | 2.292667    |
| "ll10ra"     | 2.472176567 | 2.5616541   | 2.465162933 | 2.606061533 | 2.518700967 | 3.000373033 | 2.5147644   | 2.615431767 |
| "ll10rb"     | 6.3149567   | 5.1711674   | 6.958778    | 6.3602996   | 7.0803976   | 7.730094    | 7.527566    | 6.9487815   |
| "ll11"       | 2.9633205   | 3.0088925   | 2.9846563   | 3.1034207   | 3.0932152   | 2.9023027   | 3.070037    | 3.0704591   |
| "ll12a"      | 3.4148958   | 3.348151    | 5.3312645   | 4.968163    | 4.4217217   | 3.2011502   | 5.2730985   | 5.064413    |
| "ll12b"      | 2.7831368   | 2.9653966   | 2.852116    | 2.9951673   | 2.8506222   | 2.821874    | 2.8504813   | 2.9398234   |
| "ll13"       | 2.7599864   | 2.891636    | 2.820245    | 2.8830981   | 2.815798    | 2.8101306   | 2.8103342   | 2.8801634   |
| "ll13ra1"    | 3.854733225 | 2.95406795  | 3.165188075 | 3.243639    | 3.104555825 | 2.983364075 | 3.148331075 | 3.17947045  |
| "ll13ra2"    | 2.6460583   | 2.841608    | 2.689925    | 2.9347777   | 2.6851485   | 2.6367278   | 2.6865604   | 2.7755346   |
| "ll15"       | 4.6051574   | 3.9527278   | 5.9050713   | 6.419596    | 6.0537906   | 4.086578    | 6.157028    | 6.7005816   |
| "ll15ra"     | 5.281428    | 5.93800425  | 4.77317285  | 4.53135275  | 6.2217618   | 6.12545275  | 5.4322755   | 5.237174    |
| "ll16"       | 3.34055935  | 3.3855981   | 3.4638126   | 3.116725    | 3.36698935  | 4.56213785  | 3.371366    | 3.4272646   |
| "ll17d"      | 3.0528476   | 3.3458674   | 3.2252862   | 3.3305361   | 3.178039    | 3.0462992   | 3.2605815   | 3.2629757   |
| "ll17ra"     | 5.16840785  | 3.49944825  | 3.669677    | 3.09455525  | 3.78492235  | 4.6640702   | 3.73444125  | 3.294894    |
| "ll17rb"     | 2.7985663   | 2.3386838   | 2.3363352   | 2.3925273   | 2.7756894   | 2.2759936   | 2.3184721   | 2.3819468   |
| "ll17rc"     | 2.2334893   | 2.2219515   | 2.2281256   | 2.2492986   | 2.2344093   | 2.5002565   | 2.461344    | 2.2550347   |

|           |             |             |             |             |             |             |             |             |
|-----------|-------------|-------------|-------------|-------------|-------------|-------------|-------------|-------------|
| "I18"     | 5.9637537   | 3.2421472   | 3.875661    | 3.4262745   | 3.8838532   | 5.722367    | 3.8613112   | 3.858337    |
| "I18bp"   | 4.994773    | 3.044594    | 3.018436    | 3.205919    | 3.0848095   | 3.0283024   | 3.3536396   | 3.1306622   |
| "I18r1"   | 2.2826617   | 2.3313906   | 2.3041863   | 2.3949482   | 2.3049457   | 4.336078    | 2.2995427   | 2.3805647   |
| "I11b"    | 2.7583141   | 3.0665863   | 2.7356052   | 2.8684769   | 2.73533     | 2.6809933   | 3.4970412   | 3.0226173   |
| "I1f10"   | 2.7370057   | 2.869083    | 2.8285933   | 2.8790154   | 3.065176    | 2.7427526   | 2.8247275   | 2.8848853   |
| "I1f5"    | 2.3800929   | 2.4489183   | 2.3933554   | 2.467761    | 2.3934937   | 2.362835    | 2.3816876   | 2.467678    |
| "I1r1"    | 7.224597    | 6.8021903   | 5.545658    | 5.5798144   | 5.632199    | 6.623869    | 5.639505    | 4.446823    |
| "I1r2"    | 3.8192568   | 4.1339226   | 3.6403503   | 2.648652    | 3.4506185   | 5.178729    | 2.7869434   | 2.5476465   |
| "I1rap"   | 4.356041333 | 2.808669433 | 2.895567267 | 2.8380215   | 2.713182867 | 2.762774467 | 2.617281667 | 2.879767133 |
| "I1r11"   | 2.0874233   | 2.3826604   | 2.662755    | 2.3686984   | 2.5882454   | 3.1394782   | 2.3673973   | 2.4267735   |
| "I1rn"    | 3.212625867 | 2.4136187   | 2.4103762   | 2.4694946   | 2.380967133 | 2.355911233 | 2.376991933 | 2.455698567 |
| "I12"     | 2.3975635   | 2.4913416   | 2.4399855   | 2.5584185   | 2.4465127   | 2.5216112   | 2.4407957   | 2.5435426   |
| "I121"    | 2.3415956   | 2.4315948   | 2.3790433   | 2.4941936   | 2.3834012   | 2.3401783   | 2.3777003   | 2.4792492   |
| "I121r"   | 2.272615    | 2.7199116   | 2.3178258   | 2.3836331   | 2.3285527   | 2.8226512   | 2.297899    | 2.3778276   |
| "I122"    | 2.6122248   | 2.7444189   | 2.6724236   | 2.8153677   | 2.6861541   | 2.619517    | 2.6625912   | 2.7997267   |
| "I123a"   | 2.6864383   | 2.848024    | 2.7230852   | 2.8463316   | 2.748051    | 2.720438    | 2.7153492   | 2.8232446   |
| "I12ra"   | 2.3368583   | 2.4292428   | 2.3694441   | 2.4553268   | 2.3752735   | 2.3325586   | 2.3684607   | 2.4488802   |
| "I12rb"   | 2.2687998   | 2.3593104   | 2.312356    | 2.4040291   | 2.3148696   | 2.374099    | 2.3114731   | 2.3483832   |
| "I12rg"   | 3.63474315  | 2.6631471   | 2.93408535  | 2.815163    | 2.77046835  | 6.52420615  | 3.3115967   | 3.0440154   |
| "I131ra"  | 2.3638701   | 2.122394    | 2.0898416   | 2.1389966   | 2.08927     | 2.0600872   | 2.0879893   | 2.1221912   |
| "I133"    | 5.1189203   | 3.61154     | 5.443511    | 6.130795    | 4.4546924   | 4.862256    | 4.898366    | 6.948397    |
| "I13ra"   | 2.645304    | 2.6630151   | 2.6552978   | 2.7370052   | 2.6537995   | 2.6423755   | 2.6516292   | 2.6950397   |
| "I14i1"   | 2.6072066   | 2.7436209   | 2.8112452   | 2.8537476   | 2.6963017   | 3.3585987   | 2.6841621   | 2.821935    |
| "I14ra"   | 5.4475646   | 4.30854     | 4.077382    | 3.729728    | 4.319151    | 5.2074056   | 4.113319    | 3.9440541   |
| "I15"     | 2.3062038   | 2.4223442   | 2.326523    | 2.4116833   | 2.3318493   | 2.3099024   | 2.3203099   | 2.4402184   |
| "I15ra"   | 2.8930993   | 3.114999    | 2.9792373   | 3.0969949   | 2.95467     | 2.9326687   | 2.9883525   | 3.0925393   |
| "I16ra"   | 6.54784715  | 7.42065     | 3.9259792   | 3.79179785  | 6.5537221   | 7.2521472   | 4.4919903   | 4.0824435   |
| "I16st"   | 6.663466633 | 6.9188868   | 6.6747626   | 6.664551733 | 6.6393019   | 6.738568667 | 6.660761333 | 6.655813733 |
| "I17"     | 2.5951532   | 2.7662816   | 2.6900531   | 2.8430604   | 2.6803447   | 2.88895215  | 2.67547155  | 2.79225025  |
| "I17r"    | 2.6280259   | 2.71011005  | 2.6546811   | 2.7445214   | 2.66316365  | 5.85705715  | 2.69564485  | 2.7371514   |
| "I1dr1"   | 2.3235896   | 2.4148588   | 2.3736596   | 2.4779093   | 2.381545    | 2.322929    | 2.3625212   | 2.4644628   |
| "I1f2"    | 6.45503725  | 7.3110485   | 6.74301505  | 6.7534671   | 6.7681136   | 7.0434285   | 6.74162615  | 6.76002825  |
| "I1f3"    | 4.0980381   | 4.3672786   | 4.4480722   | 4.4103774   | 4.343976233 | 4.617243767 | 4.415466733 | 4.297169667 |
| "I1k"     | 6.8558884   | 6.832864    | 7.1426773   | 6.9908156   | 7.0214505   | 7.0285916   | 7.2643905   | 6.69419     |
| "I1kap"   | 6.769471    | 6.7845125   | 6.4886577   | 6.701513    | 6.60010485  | 6.71768     | 6.791199    | 6.549517    |
| "I1mp11"  | 10.936197   | 11.111823   | 11.325704   | 11.208075   | 10.8292885  | 10.657175   | 11.609545   | 11.111823   |
| "I1mp21"  | 8.606441    | 7.791288    | 7.873866    | 7.9638405   | 8.100584    | 7.444394    | 8.546033    | 8.277683    |
| "I1mmt"   | 8.929627667 | 8.906848867 | 8.991018667 | 9.152225167 | 9.0944255   | 8.822616533 | 9.141124767 | 9.243051    |
| "I1mp3"   | 8.905509    | 9.493709    | 8.956345    | 9.0044365   | 9.156703    | 9.104168    | 8.830199    | 8.936916    |
| "I1mp4"   | 3.98699295  | 3.6045767   | 3.5992169   | 3.61764     | 3.7911621   | 3.814656    | 3.91887905  | 3.3617938   |
| "I1mpa1"  | 7.44429825  | 7.29294685  | 7.982358    | 8.53202265  | 7.69151665  | 7.66992095  | 7.887337    | 8.2317978   |
| "I1mpa2"  | 3.608988    | 2.9656541   | 3.3635318   | 3.7515817   | 3.5848596   | 3.3542757   | 3.660304    | 3.7088237   |
| "I1mpact" | 7.3265014   | 7.0754757   | 6.8629503   | 6.5307837   | 6.783462    | 8.406156    | 6.954201    | 6.898945    |
| "I1mpad1" | 9.244948    | 10.017769   | 10.007246   | 10.14418483 | 9.619513333 | 9.614444    | 9.616165667 | 10.16093033 |
| "I1mpdh1" | 4.8118362   | 4.8660946   | 4.8664064   | 4.894866    | 4.8484607   | 4.867017    | 5.1003575   | 4.8988466   |
| "I1mpg1"  | 2.5595012   | 2.6626532   | 2.6119368   | 2.7423847   | 2.616264    | 2.562923    | 2.603013    | 2.7221305   |
| "I1na"    | 2.45296515  | 2.5684926   | 2.5469774   | 2.6690041   | 2.54012535  | 2.46381605  | 2.5386531   | 2.646467    |
| "I1nad1"  | 2.60153295  | 2.51357715  | 2.44058635  | 2.57025805  | 2.47547315  | 2.5769782   | 2.4824711   | 2.68965865  |
| "I1nca1"  | 5.8369884   | 4.6308575   | 4.606191    | 5.315335    | 5.6119275   | 5.2718015   | 5.4841604   | 5.071875    |
| "I1ncenp" | 3.595595    | 3.5670575   | 3.6308755   | 3.4061277   | 3.537603    | 3.9688594   | 3.73310315  | 3.42785015  |
| "I1ng1"   | 8.1168775   | 8.13040475  | 7.270081    | 7.391087    | 8.6405895   | 8.3075135   | 7.5316945   | 7.65769775  |
| "I1ng2"   | 8.368916    | 9.3790865   | 8.271066    | 8.295208    | 8.966679    | 8.276008    | 8.380189    | 8.033841    |
| "I1ng3"   | 6.554030333 | 6.725570533 | 5.587360067 | 5.784538033 | 6.0249985   | 6.477521467 | 5.525565233 | 5.727404733 |
| "I1ng4"   | 6.3348517   | 6.645621    | 6.7245173   | 6.460985    | 6.41406     | 6.7302794   | 6.2677336   | 6.5894356   |
| "I1nha"   | 2.3278866   | 2.939791    | 2.0556538   | 2.0869555   | 2.4951668   | 1.9886514   | 2.0147529   | 2.0538342   |
| "I1nhba"  | 3.5508854   | 3.6402597   | 4.211145    | 3.9891748   | 3.8180935   | 3.366308    | 3.8124487   | 3.9237773   |
| "I1nhbb"  | 4.11824735  | 3.47361455  | 4.69112915  | 3.31305965  | 3.53392755  | 3.93993465  | 3.5245546   | 3.5233601   |
| "I1nhbc"  | 2.3636932   | 2.3852394   | 2.3581085   | 2.446508    | 2.3648634   | 2.3368464   | 2.3600295   | 2.4335501   |
| "I1nmt"   | 10.144497   | 10.912414   | 8.41865     | 9.384169    | 11.913215   | 12.2084055  | 9.496664    | 9.8792      |
| "I1no80"  | 5.90766735  | 6.22068425  | 5.4347829   | 5.3419961   | 5.69322675  | 6.1754325   | 5.1963116   | 5.51674985  |
| "I1no80b" | 2.983022    | 3.3936143   | 2.9820812   | 3.0602627   | 2.9867756   | 2.978552    | 2.9846158   | 2.9241192   |
| "I1no80c" | 7.833257    | 8.237011    | 7.822572    | 8.428998    | 7.7779593   | 7.493006    | 8.064059    | 8.478879    |
| "I1no80e" | 3.5528724   | 3.753502867 | 3.730373367 | 3.678723833 | 3.552275967 | 3.570730533 | 3.562544367 | 3.500492    |
| "I1npp1"  | 3.7445452   | 4.0569587   | 4.1612287   | 4.2093024   | 4.5318213   | 4.30778     | 4.335956    | 4.819844    |
| "I1npp4a" | 6.878749    | 7.40665     | 7.089081    | 7.1315284   | 7.3081617   | 7.3777056   | 6.9491606   | 6.9150968   |
| "I1npp5a" | 8.835337    | 9.304897    | 9.198755    | 9.325921    | 8.5792465   | 8.829313    | 9.320287    | 9.377894    |
| "I1npp5b" | 6.668643    | 6.9547753   | 7.3401017   | 7.3354955   | 6.888715    | 7.1806264   | 7.298941    | 7.2763653   |
| "I1npp5d" | 3.603982    | 3.702721    | 3.30606165  | 3.2174276   | 3.58059835  | 3.94865285  | 3.37680725  | 3.1816299   |
| "I1npp5e" | 3.8142963   | 4.0465777   | 3.9636841   | 4.57499735  | 4.10490875  | 4.18789575  | 4.23597835  | 4.3061931   |
| "I1npp5j" | 4.5587993   | 5.4477296   | 5.1548557   | 5.3993635   | 5.1550827   | 5.1154513   | 5.152668    | 5.2266035   |
| "I1npp5k" | 5.843706433 | 6.074107867 | 5.759537133 | 5.880159467 | 5.865799867 | 5.7678369   | 5.865189    | 5.7704398   |
| "I1npp11" | 7.7095714   | 7.1941423   | 8.360064    | 8.586127    | 8.045165    | 7.6216617   | 8.274415    | 8.592801    |
| "I1nsig2" | 9.794166333 | 8.781657733 | 9.150470167 | 9.407485167 | 8.602878233 | 8.512609467 | 9.080861333 | 9.399677333 |
| "I1nsl3"  | 1.8412793   | 2.2936575   | 2.4022834   | 2.0200691   | 1.9831375   | 1.9531252   | 1.9775169   | 1.9811985   |
| "I1nsl6"  | 2.6070335   | 2.7145348   | 2.6643486   | 2.811446    | 2.6726475   | 2.6429877   | 2.6738596   | 2.7585738   |
| "I1nslr"  | 2.7021108   | 3.5518007   | 2.6892843   | 2.7891808   | 2.721858    | 2.806045    | 2.7209575   | 2.7907176   |
| "I1nslrr" | 2.759709    | 2.8271976   | 2.7647514   | 2.8898702   | 2.7880301   | 2.7534144   | 2.7479138   | 2.8426766   |
| "I1nts1"  | 6.1071086   | 6.9409246   | 7.003141    | 6.666734    | 6.59544     | 6.4974585   | 6.456398    | 6.7045546   |
| "I1nts12" | 6.9893384   | 7.7267437   | 6.579968    | 6.670966    | 7.0628295   | 7.096206    | 6.7184224   | 7.0831847   |
| "I1nts3"  | 5.2597458   | 5.50535135  | 5.1310172   | 5.5091363   | 5.2158312   | 5.44669285  | 5.2476203   | 5.48884845  |
| "I1nts4"  | 6.2369437   | 7.046621    | 6.8900304   | 7.147112    | 6.8174543   | 6.86436     | 6.9254537   | 6.8222995   |

|               |             |             |             |             |             |             |             |             |
|---------------|-------------|-------------|-------------|-------------|-------------|-------------|-------------|-------------|
| "Ints5"       | 5.893195267 | 6.245219033 | 5.9552982   | 6.036650233 | 6.024181533 | 6.011997633 | 6.050323067 | 5.963723467 |
| "Ints6"       | 5.82618575  | 5.67242265  | 5.4526175   | 5.36074335  | 5.2555875   | 5.7040794   | 5.6862442   | 5.5171809   |
| "Ints7"       | 4.4466822   | 3.96709705  | 4.378361    | 4.30517625  | 4.3658383   | 4.90813255  | 4.5302363   | 4.3961778   |
| "Ints8"       | 4.88571405  | 5.020288    | 4.8951077   | 5.06452395  | 5.1024056   | 4.62176065  | 5.20318955  | 5.1334658   |
| "Ints9"       | 5.739866    | 6.4549236   | 5.9661956   | 6.6137433   | 5.9787703   | 6.237568    | 6.4523406   | 6.1947412   |
| "Invs"        | 3.7797484   | 3.63356     | 3.6128922   | 3.7238584   | 3.6223998   | 3.8994222   | 3.9894314   | 3.731134    |
| "Ip6k1"       | 5.033226    | 5.7078899   | 4.707576033 | 4.489011467 | 5.040282467 | 5.231369167 | 4.658310167 | 4.3443842   |
| "Ip011"       | 6.5527296   | 6.979148    | 7.1665845   | 7.0232143   | 7.0446053   | 7.100579    | 6.647093    | 6.980165    |
| "Ip04"        | 8.143069933 | 8.285575767 | 8.077785667 | 7.9885978   | 8.032194267 | 8.1037496   | 8.530108833 | 8.161142833 |
| "Ip05"        | 6.964233667 | 7.2501871   | 7.0052228   | 7.080463267 | 7.1171981   | 6.9097115   | 7.2519031   | 7.1179855   |
| "Ip07"        | 10.522623   | 10.561004   | 10.3097925  | 10.545584   | 10.331213   | 10.713436   | 10.536615   | 10.618495   |
| "Ip08"        | 7.5716567   | 7.2526426   | 7.713652    | 7.8324437   | 7.3008156   | 7.360826    | 7.7321324   | 7.7651467   |
| "Ip09"        | 7.293796    | 7.7180104   | 7.530131    | 7.6411333   | 7.846118    | 7.208833    | 7.8014455   | 7.656907    |
| "Ipp"         | 5.9676533   | 5.754494    | 6.1139607   | 6.5286236   | 6.114925    | 5.673807    | 6.3345866   | 6.146541    |
| "Ippk"        | 4.143717    | 4.9079733   | 4.4706883   | 4.729198    | 4.612594    | 5.0327196   | 4.59508     | 4.2619123   |
| "Iqcc"        | 1.7914099   | 1.9884917   | 1.9193783   | 1.9479632   | 2.5538034   | 2.2221584   | 1.7969323   | 1.9672884   |
| "Iqcf3"       | 2.78885005  | 2.95125525  | 2.85965395  | 3.02017465  | 2.8736515   | 2.80599425  | 2.85546695  | 2.99919185  |
| "Iqcj-schip1" | 9.99101     | 10.312331   | 10.32226    | 10.98002    | 10.284674   | 10.475818   | 10.353138   | 10.713692   |
| "Iqgap1"      | 5.96197296  | 5.5338114   | 6.21216526  | 5.94356174  | 5.96990654  | 6.43396892  | 6.059543    | 5.97702174  |
| "Iqgap2"      | 8.511921    | 4.118536    | 4.612085    | 4.31557     | 4.8969426   | 5.794481    | 4.5818057   | 4.259793    |
| "Iqsec1"      | 6.079817    | 5.6230015   | 6.80858625  | 6.82318185  | 6.721454    | 6.5517493   | 6.76200605  | 6.874165    |
| "Irak1"       | 7.67001625  | 8.05739335  | 7.823681925 | 7.75596575  | 7.938776    | 8.11778775  | 7.973467075 | 7.77592685  |
| "Irak1bp1"    | 4.84915115  | 5.0768328   | 4.6849431   | 4.90399195  | 5.11834125  | 4.77423585  | 5.0567055   | 4.90390805  |
| "Irak4"       | 2.6568978   | 2.7694491   | 2.71222875  | 2.82359385  | 2.70974195  | 2.74044225  | 2.7036264   | 2.7872529   |
| "Ireb2"       | 8.033448    | 8.482875    | 8.268001    | 8.384576    | 8.406676    | 8.49954     | 8.151174    | 8.601315    |
| "Irf1"        | 5.8862877   | 5.3698015   | 6.6433754   | 6.4147983   | 6.7937603   | 7.1474586   | 7.4114404   | 6.9111695   |
| "Irf2"        | 6.3046713   | 6.7120004   | 5.632371    | 5.82379     | 6.565029    | 7.0065327   | 5.9475994   | 5.7550726   |
| "Irf2bp1"     | 3.3701503   | 2.9720328   | 3.4642692   | 3.7662175   | 3.4628322   | 3.8220255   | 3.4996727   | 3.5128155   |
| "Irf3"        | 4.049690225 | 4.11824865  | 4.23662575  | 4.094516925 | 4.37515285  | 4.44016215  | 4.250026375 | 4.12654685  |
| "Irf4"        | 3.29286755  | 2.5526888   | 2.4338429   | 2.3201567   | 4.20704175  | 5.4454532   | 3.5486332   | 2.44268095  |
| "Irf5"        | 3.17612485  | 3.15889265  | 3.1362498   | 3.3374345   | 3.24473845  | 3.41937615  | 3.3126108   | 3.35410365  |
| "Irf6"        | 5.6126037   | 2.1164079   | 3.1935358   | 2.156757    | 2.0970287   | 2.0854826   | 2.090813    | 2.1579428   |
| "Irf7"        | 3.839396    | 2.1302662   | 1.9515802   | 2.1679177   | 2.0900218   | 2.5717664   | 4.009318    | 2.1689954   |
| "Irf8"        | 3.4607495   | 2.61998495  | 2.8703645   | 2.9485327   | 2.53319145  | 5.76829145  | 3.528339    | 2.9816073   |
| "Irf9"        | 4.3896832   | 3.3649538   | 4.543329    | 3.9039435   | 4.3722425   | 4.595526    | 5.4115057   | 4.815715    |
| "Irgm1"       | 5.654627    | 4.148141    | 5.5223303   | 5.8034616   | 5.707717    | 5.603135    | 6.419299    | 5.9914007   |
| "Irgm2"       | 6.246061    | 4.915207    | 6.7935786   | 6.999076    | 6.8001356   | 5.6414084   | 7.993268    | 6.946705    |
| "Irs1"        | 10.338682   | 10.274167   | 11.10799    | 10.754101   | 10.350458   | 12.321688   | 11.011259   | 10.762844   |
| "Irs2"        | 9.727062    | 8.738581    | 6.2556      | 6.473198    | 7.4904985   | 8.547354    | 6.4759297   | 6.728781    |
| "Irs3"        | 2.5621405   | 2.7304657   | 2.6968305   | 2.7904654   | 2.6957238   | 2.660411    | 2.6725657   | 2.778421    |
| "Irx3"        | 2.8363876   | 3.5651045   | 4.2087154   | 5.956023    | 6.5501833   | 6.05766     | 3.5292225   | 6.1195054   |
| "Irx4"        | 2.3068094   | 2.4206173   | 2.75678     | 2.4230669   | 2.3561046   | 2.3020496   | 2.355288    | 2.4237962   |
| "Irx5"        | 2.4237561   | 2.49193     | 3.0410867   | 2.3797364   | 6.9715424   | 5.700547    | 2.4367337   | 3.3768694   |
| "Isca1"       | 10.28371225 | 10.6440275  | 10.61584875 | 11.032863   | 10.48517775 | 10.4235045  | 10.5197245  | 10.9252475  |
| "Isca2"       | 9.548672    | 9.795462    | 9.782779    | 9.780059    | 9.935787    | 9.442609    | 10.025586   | 9.760827    |
| "Iscau"       | 11.168001   | 11.568188   | 11.3594885  | 11.381856   | 11.469179   | 11.175095   | 11.289467   | 11.374808   |
| "Isq20"       | 2.7443576   | 2.245928    | 1.8630525   | 2.233776    | 3.1620803   | 4.279278    | 2.8124185   | 2.7956877   |
| "Isl2"        | 2.3644085   | 2.4843626   | 2.4346826   | 2.4866292   | 2.4339583   | 2.4100602   | 2.4325972   | 2.473973    |
| "Islr"        | 6.1763887   | 3.659402    | 7.6054587   | 7.0359726   | 6.9119334   | 5.8544984   | 7.2282195   | 7.028661    |
| "Isoc1"       | 5.9194575   | 5.481183667 | 6.526197633 | 6.155219567 | 5.988837    | 5.374686233 | 6.593897667 | 6.388701567 |
| "Isoc2b"      | 4.25654     | 3.3020287   | 4.3340726   | 4.2720523   | 4.132894    | 3.8877296   | 4.092702    | 4.1248937   |
| "Isy1"        | 3.7252681   | 3.4070275   | 4.1056366   | 3.459034    | 3.749149    | 3.301834    | 4.434826    | 3.4459248   |
| "Isyna1"      | 4.00395     | 2.1032994   | 2.0958626   | 2.1435452   | 2.0935342   | 2.1391025   | 2.0929704   | 2.067603    |
| "Itch"        | 8.059821    | 8.924543    | 7.5302196   | 7.762656    | 8.177174    | 8.871481    | 7.8471355   | 7.860484    |
| "Itfg1"       | 7.1478243   | 7.52458735  | 7.7614305   | 8.249829    | 7.49758005  | 6.98687125  | 7.678919    | 7.929661    |
| "Itfg2"       | 4.864755    | 5.7115173   | 5.32991     | 4.8767266   | 4.8721466   | 5.20098     | 4.547352    | 4.8842587   |
| "Itga2"       | 2.5590916   | 2.604525    | 2.590133    | 2.6431549   | 2.5880609   | 2.5617332   | 2.5817652   | 2.6595314   |
| "Itga2b"      | 2.538406    | 2.5404997   | 2.5405388   | 2.5813217   | 2.539043    | 2.533086    | 2.5360498   | 2.5737252   |
| "Itga3"       | 3.5445817   | 3.534602    | 3.503759    | 3.5597138   | 3.49014     | 3.4131408   | 3.4603631   | 3.5187635   |
| "Itga4"       | 2.76875475  | 2.87616095  | 2.7998006   | 2.95067665  | 2.79477915  | 2.7653179   | 2.79599035  | 2.90210035  |
| "Itga5"       | 2.4646251   | 2.5526505   | 2.5023174   | 2.6155052   | 2.5068758   | 2.4633393   | 2.4827561   | 2.4852228   |
| "Itga6"       | 6.45573355  | 6.21128785  | 7.506723    | 7.29360465  | 7.384629    | 7.1342193   | 7.62909165  | 7.535878    |
| "Itga7"       | 7.33213     | 6.555724    | 6.844147    | 6.4898887   | 6.733342    | 5.974493    | 8.037212    | 6.5930524   |
| "Itga9"       | 3.9263117   | 3.6980694   | 3.936191433 | 3.736436133 | 3.561331    | 3.611081    | 3.541389233 | 3.497533667 |
| "Itgae"       | 2.6392124   | 2.7212856   | 2.6805966   | 2.7993722   | 2.6820567   | 2.6388507   | 2.725799    | 2.7857587   |
| "Itgam"       | 2.5269787   | 2.4184763   | 2.5216854   | 2.480274    | 2.4507887   | 2.400904    | 2.448128    | 2.4803267   |
| "Itgav"       | 4.817515333 | 4.604870333 | 4.8734725   | 4.935818833 | 4.800882667 | 4.637413667 | 4.794610867 | 5.0006548   |
| "Itgb1"       | 6.19204424  | 5.94988954  | 6.26444742  | 6.2731872   | 6.13423508  | 5.94097604  | 6.14263338  | 6.2414155   |
| "Itgb1bp1"    | 8.788243    | 8.497739    | 8.937707    | 9.075057    | 8.775235    | 8.347678    | 9.64934     | 8.823249    |
| "Itgb1bp2"    | 10.419375   | 10.093274   | 10.999418   | 10.772838   | 10.836745   | 10.030828   | 10.2276535  | 10.6896105  |
| "Itgb2"       | 6.551922    | 3.151122    | 4.4008517   | 3.0827      | 4.7845454   | 6.0837007   | 5.181197    | 3.4609785   |
| "Itgb2l"      | 2.4242828   | 2.5137224   | 2.4801273   | 2.4931746   | 2.469731    | 2.4564574   | 2.4703994   | 2.4753103   |
| "Itgb3bp"     | 2.9084626   | 3.102462333 | 2.981898533 | 3.2220818   | 2.8336056   | 2.9013564   | 2.9826765   | 3.1201797   |
| "Itgb4"       | 2.2939148   | 2.1942005   | 2.5786865   | 2.384738    | 3.425559    | 1.8511713   | 2.3112354   | 2.4025688   |
| "Itgb5"       | 8.71539475  | 8.8682      | 8.77246325  | 8.97096525  | 9.051221    | 8.626724625 | 8.695817925 | 8.9267415   |
| "Itgb6"       | 3.07499675  | 2.95770725  | 4.4934199   | 4.4084409   | 3.13976425  | 3.06714015  | 3.281727    | 3.82403775  |
| "Itgb7"       | 2.5509055   | 2.6151583   | 2.5697536   | 2.643913    | 2.5703115   | 3.060495    | 2.5610902   | 2.6292355   |
| "Itgb1"       | 5.8142285   | 5.9028087   | 8.328267    | 7.0387383   | 6.24816     | 6.520928    | 5.278051    | 7.724211    |
| "Itih1"       | 9.232942    | 2.49335     | 2.488521    | 2.5398052   | 2.4853323   | 2.4318783   | 2.4149325   | 2.5425599   |
| "Itih2"       | 9.948156    | 2.6380522   | 3.7627811   | 2.4840038   | 2.6172497   | 2.3760753   | 2.4148035   | 2.6861095   |
| "Itih3"       | 11.781739   | 2.2551434   | 5.1327333   | 2.30502     | 3.728954    | 2.254274    | 2.228597    | 2.4769561   |

|            |             |             |             |             |             |             |             |             |
|------------|-------------|-------------|-------------|-------------|-------------|-------------|-------------|-------------|
| "Itih4"    | 12.119061   | 1.8634597   | 5.5620127   | 1.9115148   | 2.576516    | 1.832448    | 1.8494586   | 2.4862342   |
| "Itih5"    | 9.149037    | 8.24468     | 10.571508   | 9.699034    | 10.700045   | 10.205944   | 10.12605    | 10.049552   |
| "Itk"      | 2.1843386   | 2.2368472   | 2.2154846   | 2.298923    | 2.2192085   | 2.3662033   | 2.2159352   | 2.2847629   |
| "Itln1"    | 2.478483    | 2.5981987   | 2.5492983   | 2.660415    | 2.5522041   | 2.5090356   | 2.5490649   | 2.6426022   |
| "Itm2a"    | 10.712144   | 10.230832   | 11.765292   | 11.06633875 | 11.1729035  | 10.61402875 | 10.9416725  | 11.1798875  |
| "Itm2b"    | 9.289333167 | 8.803343767 | 9.373991033 | 9.115727867 | 9.357375267 | 9.249051933 | 9.387717933 | 9.1713139   |
| "Itm2c"    | 7.7936916   | 7.249478    | 8.896416    | 8.243026    | 7.919155    | 8.374411    | 8.08714     | 8.36361     |
| "Itpa"     | 7.5606313   | 7.8243465   | 7.959097    | 8.011137    | 7.546623    | 7.6754947   | 7.8478956   | 7.9448185   |
| "Itpk1"    | 6.207873    | 6.4999857   | 6.0786076   | 5.4419737   | 6.582906    | 6.198016    | 6.1869473   | 5.710969    |
| "Itпка"    | 2.3362699   | 2.448358    | 2.412885    | 2.4831746   | 2.416304    | 2.378111    | 2.500565    | 2.5042932   |
| "Itpkb"    | 4.7501197   | 4.611796    | 5.181555    | 5.148823    | 5.107911    | 5.4857206   | 5.4211483   | 5.4152207   |
| "Itpr1"    | 6.5792535   | 6.7901194   | 6.67954215  | 7.9877352   | 6.3273123   | 6.5590813   | 6.1843445   | 7.09126015  |
| "Itpr2"    | 4.113361625 | 4.06008225  | 3.86866305  | 3.9881018   | 4.195149275 | 4.375888475 | 3.870423875 | 3.8860984   |
| "Itpr3"    | 2.4545915   | 2.6266856   | 2.4917462   | 2.5082223   | 2.4892073   | 2.610577    | 2.4565089   | 2.542522    |
| "Itsn1"    | 5.70224214  | 6.155624    | 6.52306656  | 6.89838242  | 6.16349684  | 5.97046936  | 6.44385348  | 6.86291316  |
| "Itsn2"    | 5.873834267 | 6.183917133 | 5.976177733 | 5.972164867 | 6.057175133 | 6.746797167 | 5.930962133 | 6.058227867 |
| "Ivd"      | 8.9458725   | 8.713742    | 8.922779    | 8.6724825   | 9.36166975  | 9.34568825  | 9.0104615   | 9.126157    |
| "Ivl"      | 2.7792969   | 2.9075797   | 2.833205    | 3.0047219   | 2.8414938   | 2.7876103   | 2.8292975   | 2.9683735   |
| "Ivns1abp" | 8.6047548   | 9.2782509   | 8.268658333 | 8.492517733 | 8.7643692   | 9.156497867 | 8.317943767 | 8.654545633 |
| "Iyd"      | 6.5352845   | 2.0580616   | 2.0304372   | 2.1074297   | 2.0336313   | 2.0181205   | 2.0413105   | 2.1037915   |
| "Jag1"     | 3.70758415  | 3.774509    | 3.42305125  | 3.6318494   | 3.92596965  | 3.80374485  | 3.4636574   | 3.71974455  |
| "Jag2"     | 4.63442775  | 4.6948686   | 4.9444553   | 4.90761755  | 4.4816072   | 4.6550774   | 4.70690575  | 4.84194695  |
| "Jagn1"    | 8.840326    | 9.094276    | 8.668643    | 8.797317    | 8.787184    | 8.790726    | 8.732801    | 8.48177     |
| "Jak1"     | 8.838342    | 9.723038667 | 9.214438667 | 9.284422167 | 8.794858333 | 9.772034667 | 8.773192    | 8.934471    |
| "Jak2"     | 7.04798245  | 7.567453    | 7.6716515   | 8.59214975  | 7.3337693   | 7.31854685  | 7.088584    | 8.16128165  |
| "Jam2"     | 3.534071325 | 3.577189975 | 3.981489125 | 4.197496775 | 3.729289325 | 3.73862335  | 3.892565    | 4.154093425 |
| "Jam3"     | 3.61220275  | 3.43669275  | 3.9347842   | 4.0260243   | 3.93034315  | 3.8789809   | 4.09093965  | 4.04744135  |
| "Jarid2"   | 6.119543767 | 5.606233333 | 7.270063367 | 7.4865538   | 6.207289567 | 5.6697793   | 7.262280933 | 7.159071567 |
| "Jdp2"     | 7.022348    | 5.221821    | 6.815012    | 6.079882    | 6.609188    | 6.936805    | 6.56798     | 6.652643    |
| "Jhdm1d"   | 2.7054405   | 2.8731992   | 2.7704675   | 2.9350424   | 2.7754703   | 2.9461522   | 2.7716498   | 2.8334813   |
| "Jkamp"    | 6.91694425  | 6.51244355  | 7.8446575   | 7.6946748   | 7.24831035  | 7.08325935  | 7.7442667   | 7.34659585  |
| "Jmjd1c"   | 9.481011    | 9.850022    | 8.731731    | 8.798839    | 9.316703    | 9.919275    | 8.816421    | 9.138503    |
| "Jmjd5"    | 4.8460636   | 5.7266874   | 5.732975    | 6.1861367   | 5.6457796   | 5.4708266   | 5.4334245   | 6.169691    |
| "Jmjd6"    | 6.30075955  | 7.0125205   | 6.33698815  | 6.63398135  | 6.7234275   | 6.95116085  | 6.46702215  | 6.6380962   |
| "Jmjd7"    | 5.125233    | 5.2934766   | 5.1529074   | 5.233883    | 5.2416196   | 5.1032457   | 5.166522    | 5.142486    |
| "Jmjd8"    | 5.133841    | 4.939823    | 5.903337    | 5.2163086   | 4.992703    | 4.830965    | 5.707196    | 5.1645417   |
| "Jmy"      | 5.2599799   | 5.770257133 | 4.513457667 | 4.483629533 | 5.078836533 | 5.383576333 | 4.596595933 | 4.817641    |
| "Josd2"    | 6.5399184   | 6.355433    | 6.8953443   | 6.890245    | 6.5162954   | 6.315593    | 6.8634486   | 6.5758777   |
| "Jph1"     | 6.396348    | 6.7492237   | 6.385705    | 6.9406404   | 6.1713448   | 6.356651    | 5.8443165   | 6.7752476   |
| "Jph2"     | 2.3840072   | 3.1353607   | 3.4087996   | 4.2050653   | 2.3624282   | 3.0835705   | 3.1168842   | 4.1441708   |
| "Jrk"      | 2.258846    | 2.422998    | 2.2670684   | 2.3460352   | 2.3077404   | 2.2937994   | 2.3019645   | 2.3594952   |
| "Jtb"      | 11.272795   | 11.17585    | 11.777024   | 11.825439   | 11.039765   | 10.893902   | 11.765402   | 11.555723   |
| "Jub"      | 3.0663977   | 2.758522    | 3.0887485   | 3.0813887   | 3.0720777   | 3.002074    | 3.1357586   | 3.3804054   |
| "Jun"      | 8.5834715   | 9.3997505   | 9.3070745   | 8.64281675  | 8.6931922   | 8.655846    | 8.79660375  | 8.6514507   |
| "Junb"     | 5.892823    | 4.7597113   | 3.2615168   | 3.0819712   | 4.0121193   | 3.6920369   | 4.6421204   | 3.1427062   |
| "Jund"     | 9.226338    | 8.518509    | 8.916669    | 8.190408    | 8.550724    | 8.767984    | 8.383267    | 7.9307094   |
| "Jup"      | 7.4174066   | 7.943532    | 6.5722184   | 6.6890016   | 7.8097224   | 7.3530197   | 5.608521    | 6.82251     |
| "Kalrn"    | 4.2210982   | 4.13663865  | 4.2472905   | 4.4159174   | 4.27959085  | 4.0591332   | 4.6710067   | 4.2799239   |
| "Kank2"    | 4.1025076   | 3.7008042   | 5.6796765   | 5.2116375   | 5.0812626   | 4.2488527   | 6.034178    | 5.6923175   |
| "Kank3"    | 6.616295    | 7.0869519   | 6.47521685  | 6.714607    | 7.3864227   | 7.86627875  | 6.8000295   | 7.0296213   |
| "Kans1"    | 4.0271207   | 4.0807892   | 3.75177145  | 3.78693295  | 3.87391125  | 3.857349    | 3.6004996   | 3.8684277   |
| "Kans11"   | 6.580434533 | 6.90169     | 7.624464333 | 8.040861433 | 6.773616733 | 6.337061367 | 7.095295667 | 8.002142333 |
| "Kans12"   | 9.383847    | 9.913637    | 9.7911203   | 10.039066   | 9.833666    | 10.103322   | 9.958674    | 9.876699    |
| "Kap"      | 2.537975    | 2.6518764   | 2.584724    | 2.7377832   | 2.5855637   | 2.5365222   | 2.5817778   | 2.705673    |
| "Kars"     | 9.40204     | 9.702937    | 9.542517    | 9.497426    | 9.221051    | 8.9823065   | 9.962641    | 9.398113    |
| "Kat2a"    | 4.406323433 | 4.639951133 | 4.421926767 | 4.444367167 | 4.5904416   | 4.1542708   | 4.591946533 | 4.445644633 |
| "Kat2b"    | 8.31223225  | 8.5281755   | 8.445298    | 8.50632625  | 8.44735825  | 7.95521025  | 8.85494825  | 8.4164978   |
| "Katna1"   | 7.5046296   | 7.836679    | 7.821508    | 7.85346     | 7.647876    | 7.5718327   | 7.9160438   | 7.8908963   |
| "Katnb1"   | 4.6041994   | 5.359191    | 5.1083484   | 5.1070375   | 4.849245    | 4.615094    | 5.1040564   | 4.9552927   |
| "Kazald1"  | 4.854647    | 5.3742294   | 7.794796    | 5.99247     | 4.9405017   | 4.33314     | 5.4572115   | 5.552157    |
| "Kbtbd2"   | 8.836694    | 9.486215    | 8.077734    | 8.051445    | 9.019101    | 9.618235    | 8.279973    | 8.314961    |
| "Kbtbd4"   | 5.858308    | 5.9260583   | 6.1282287   | 6.7232237   | 5.976767    | 5.661211    | 6.1106744   | 6.396572    |
| "Kcmf1"    | 9.429846233 | 10.5973147  | 9.92859     | 10.18836877 | 9.688509667 | 10.51595543 | 10.02653033 | 10.13112917 |
| "Kcna1"    | 6.1682825   | 5.956843    | 5.5806494   | 4.7575855   | 6.2936087   | 5.445958    | 5.0295      | 5.0606728   |
| "Kcna2"    | 2.4693422   | 2.53661     | 2.5057445   | 2.5926175   | 2.5065498   | 2.4655447   | 2.4968333   | 2.5855558   |
| "Kcna5"    | 6.42565     | 7.150918    | 6.72877     | 6.654722    | 7.4528694   | 7.4218106   | 6.785838    | 6.609197    |
| "Kcna7"    | 9.026564    | 8.88217     | 10.074792   | 10.492087   | 9.922709    | 8.970654    | 9.605769    | 10.199619   |
| "Kcnab1"   | 3.5174224   | 4.598215    | 4.233045    | 4.78573     | 4.235967    | 4.3807945   | 3.7838967   | 4.1512294   |
| "Kcnab3"   | 2.881815    | 3.1901805   | 3.024695    | 3.1036787   | 3.0316174   | 2.9792004   | 3.0235388   | 3.07321     |
| "Kcnb1"    | 6.630488667 | 6.334826467 | 6.870362067 | 6.718991133 | 6.625743633 | 6.320139467 | 6.901328333 | 6.708727667 |
| "Kcnc1"    | 4.438487    | 4.7668986   | 4.898145    | 5.7953095   | 4.8174214   | 4.236575    | 4.595679    | 4.902593    |
| "Kcnc3"    | 2.55586815  | 2.63922555  | 2.5922391   | 2.68749535  | 2.6028842   | 2.55586645  | 2.59275985  | 2.71322875  |
| "Kcnc4"    | 5.4813063   | 6.37687585  | 6.1996439   | 5.7695394   | 5.69246035  | 5.61367875  | 6.08381435  | 5.43777515  |
| "Kcnd1"    | 2.3648303   | 2.440127    | 2.390454    | 2.4744985   | 2.3924801   | 2.3610766   | 2.3881288   | 2.4706247   |
| "Kcnd2"    | 2.3677108   | 2.47003695  | 2.4284939   | 2.5249542   | 2.42999315  | 2.37704705  | 2.4273565   | 2.50896535  |
| "Kcnd3"    | 2.3385053   | 2.4816456   | 2.3718014   | 2.441825    | 2.3765197   | 2.3346543   | 2.370884    | 2.4546957   |
| "Kcne2"    | 2.3783557   | 2.5609922   | 2.418212    | 2.5491107   | 2.411528    | 2.394822    | 2.4121342   | 2.5355892   |
| "Kcne3"    | 2.7850802   | 3.015234    | 2.8969803   | 3.0715837   | 2.901822    | 2.8553045   | 2.8858237   | 3.0012774   |
| "Kcne4"    | 5.0161204   | 4.864436    | 4.3482137   | 4.65218     | 5.0717416   | 4.6795073   | 4.5268583   | 4.711006    |
| "Kcnh3"    | 4.7101607   | 4.909883    | 4.706884    | 4.7744875   | 4.746134    | 4.899037    | 4.778624    | 4.773573    |
| "Kcnip1"   | 2.5377782   | 2.61033545  | 2.56662285  | 2.62113555  | 2.5754719   | 2.5356561   | 2.6196214   | 2.5958376   |

|           |             |             |             |             |             |             |             |             |
|-----------|-------------|-------------|-------------|-------------|-------------|-------------|-------------|-------------|
| "Kcni2"   | 2.4264858   | 2.5179117   | 2.4829485   | 2.6823654   | 2.4842093   | 2.416891    | 2.4770586   | 2.6242175   |
| "Kcni3"   | 2.8046014   | 3.4824362   | 2.9028194   | 2.954018    | 2.8797443   | 2.8188114   | 2.7656305   | 2.9067826   |
| "Kcni4"   | 2.4778018   | 2.5864434   | 2.535502    | 2.6578918   | 2.533629    | 2.503728    | 2.5068297   | 2.6013398   |
| "Kcnj1"   | 2.3089051   | 2.3922257   | 2.3528254   | 2.43141     | 2.351449    | 2.3071501   | 2.3511343   | 2.4250052   |
| "Kcnj11"  | 3.5731187   | 4.7662516   | 3.9710667   | 4.4968286   | 3.9673476   | 3.908397    | 3.965645    | 4.1287336   |
| "Kcnj12"  | 6.007824    | 6.7238255   | 6.5862756   | 6.841606    | 6.696093    | 6.06384     | 6.4256644   | 6.468378    |
| "Kcnj15"  | 2.382574    | 2.4562526   | 2.423373    | 2.513788    | 2.438366    | 2.3929977   | 2.4407053   | 2.4900904   |
| "Kcnj2"   | 2.7665834   | 3.0304718   | 2.8837616   | 3.0356445   | 2.8857596   | 2.8172898   | 2.8815682   | 2.9969068   |
| "Kcnj3"   | 2.3902652   | 2.6201203   | 2.508129    | 2.5953987   | 2.5185504   | 2.4739876   | 2.51759     | 2.6219757   |
| "Kcnj6"   | 2.52400085  | 2.61442075  | 2.67666935  | 2.65273625  | 2.5993283   | 2.52856475  | 2.57063675  | 2.63187315  |
| "Kcnj8"   | 7.9315453   | 8.010629    | 8.319898    | 9.0001955   | 8.310836    | 8.454382    | 8.213844    | 8.946593    |
| "Kcnj9"   | 2.58079935  | 2.63731215  | 2.6069213   | 2.68652115  | 2.77961625  | 2.54809275  | 2.6038023   | 2.68301285  |
| "Kcnk1"   | 2.99696815  | 3.49629265  | 3.1479828   | 3.05134545  | 3.40166625  | 3.10819445  | 3.0089221   | 3.19756945  |
| "Kcnk13"  | 2.4794254   | 2.544721    | 2.5639198   | 2.5880775   | 2.5066388   | 2.5102232   | 2.4972818   | 2.5627005   |
| "Kcnk2"   | 2.8645391   | 2.918066    | 3.3307295   | 3.2245305   | 3.3702328   | 3.028933    | 3.6398532   | 4.0221987   |
| "Kcnk3"   | 2.8734513   | 3.15132025  | 2.9530438   | 3.39785255  | 3.0393749   | 3.4551927   | 3.25147315  | 3.20126305  |
| "Kcnk5"   | 3.48705525  | 3.13010085  | 2.6631006   | 2.542875    | 2.66330405  | 3.05395975  | 2.41082405  | 2.4981455   |
| "Kcnma1"  | 5.1042639   | 5.1500797   | 5.27783865  | 5.7998405   | 4.76915405  | 4.55024415  | 5.540683    | 5.5364718   |
| "Kcnmb4"  | 2.6185408   | 2.65301     | 2.6284623   | 2.7188985   | 2.845333    | 2.549498    | 2.6275105   | 2.682349    |
| "Kcnn1"   | 4.69332075  | 5.0068975   | 4.78632975  | 5.1955588   | 4.5731082   | 4.41730095  | 4.80187845  | 5.11073805  |
| "Kcnn2"   | 4.7900867   | 3.8772726   | 4.294189    | 4.573902    | 3.8968961   | 2.7307906   | 3.4251118   | 4.6067376   |
| "Kcnn3"   | 2.3419592   | 2.3957205   | 2.3609517   | 2.457348    | 2.3595273   | 2.3372073   | 2.3594203   | 2.428525    |
| "Kcnn4"   | 2.5485395   | 2.59618375  | 2.5788678   | 2.61460325  | 2.57895805  | 2.9471804   | 2.59099325  | 2.6377325   |
| "Kcnq1"   | 2.296062    | 2.4347758   | 2.3996284   | 2.477886    | 2.400036    | 2.3912196   | 2.3991828   | 2.429746    |
| "Kcnq2"   | 2.51993095  | 2.61051515  | 2.63747215  | 2.70238635  | 2.57635515  | 2.52308165  | 2.5620486   | 2.6492002   |
| "Kcnq5"   | 3.0520203   | 3.0995586   | 3.3375018   | 3.1982365   | 3.410436    | 2.8615043   | 3.2747364   | 3.2966511   |
| "Kcns1"   | 2.3188424   | 2.4020977   | 2.36774     | 2.4566963   | 2.3729274   | 2.3538167   | 2.3570685   | 2.4849358   |
| "Kcns2"   | 2.4073377   | 2.5083556   | 2.4370844   | 2.5378535   | 2.4404306   | 2.4122274   | 2.4372435   | 2.5287192   |
| "Kcnu1"   | 2.125881    | 2.1750748   | 2.109581    | 2.0677032   | 2.6332822   | 2.1116605   | 2.2774825   | 2.253497    |
| "Kctd1"   | 4.1369789   | 4.3476693   | 4.2581672   | 4.2630174   | 4.171821    | 4.06653935  | 4.0914156   | 4.21026785  |
| "Kctd10"  | 5.576571    | 4.996326    | 5.192884    | 4.591691    | 5.527409    | 6.3252683   | 5.6999555   | 5.337154    |
| "Kctd11"  | 2.6767712   | 3.0292819   | 3.081104    | 3.0950837   | 2.7045445   | 2.8534927   | 3.1219797   | 3.0585651   |
| "Kctd12"  | 6.894606    | 5.918483    | 8.322       | 7.394916    | 7.285226    | 8.120788    | 7.4274416   | 7.5453157   |
| "Kctd17"  | 3.4639704   | 3.38914     | 4.405447    | 4.068364    | 4.4755793   | 4.5830703   | 4.1927576   | 4.144555    |
| "Kctd2"   | 5.585785    | 5.713449    | 6.066281    | 6.4140544   | 6.211329    | 5.680556    | 7.3690734   | 6.4251113   |
| "Kctd20"  | 7.883558333 | 8.5820188   | 6.021608333 | 6.327487767 | 8.045426    | 8.371617333 | 6.6003995   | 6.65785     |
| "Kctd4"   | 2.3561964   | 2.4813273   | 2.4948735   | 2.5203242   | 2.4226086   | 2.3687627   | 2.4097505   | 2.4996493   |
| "Kctd5"   | 5.0689418   | 5.672814    | 5.1869595   | 5.2431445   | 5.30554865  | 5.60655635  | 5.2657225   | 4.9618212   |
| "Kctd9"   | 7.911691    | 8.508268    | 8.248649    | 8.393222    | 8.182324    | 8.560644    | 8.326222    | 8.58957     |
| "Kdelc1"  | 5.6454717   | 5.48314765  | 5.7748251   | 5.88212035  | 6.0544642   | 6.17845085  | 5.94872025  | 5.885061    |
| "Kdelr1"  | 8.970873    | 8.821754    | 9.141176    | 8.917821    | 9.078611    | 9.01716     | 9.067933    | 8.940967    |
| "Kdelr2"  | 7.7306825   | 7.1724155   | 8.3312347   | 7.4164795   | 7.2690677   | 7.66685025  | 7.54364125  | 7.3780705   |
| "Kdelr3"  | 2.2206004   | 2.3470464   | 4.8060093   | 3.9790883   | 2.476318    | 2.2312484   | 3.0311694   | 3.374238    |
| "Kdm1a"   | 8.0112228   | 8.5241705   | 7.95435425  | 7.9255035   | 8.33348015  | 8.48597625  | 7.953011    | 8.0938512   |
| "Kdm2b"   | 5.867543    | 5.375699    | 7.1220665   | 7.1335526   | 6.460681    | 6.2428484   | 6.495434    | 6.8177004   |
| "Kdm3a"   | 7.687716    | 8.396422    | 7.008398    | 6.88689     | 8.153754    | 8.54666     | 7.1552978   | 7.2769485   |
| "Kdm3b"   | 7.9352655   | 8.899082    | 7.9362965   | 8.095891    | 8.501675    | 8.734506    | 7.720542    | 8.167064    |
| "Kdm4b"   | 4.3208327   | 5.058809    | 3.8347657   | 3.991939    | 4.3743343   | 4.6290464   | 4.2170606   | 4.2711434   |
| "Kdm4c"   | 6.499549    | 7.001341    | 6.6020093   | 7.1014204   | 6.9103913   | 7.0744896   | 6.750895    | 6.963095    |
| "Kdm5a"   | 7.560753    | 8.213346    | 7.1684575   | 7.3060303   | 7.9224143   | 8.187716    | 7.2966895   | 7.2557187   |
| "Kdm5b"   | 4.13616075  | 4.32169915  | 4.03032945  | 4.09873625  | 4.6255795   | 4.53512765  | 4.28820555  | 4.2078794   |
| "Kdm5c"   | 2.84496415  | 3.02284895  | 2.68790045  | 2.67199535  | 2.67292415  | 2.66377775  | 2.7024981   | 2.695542    |
| "Kdm5d"   | 2.4522734   | 4.899155    | 2.4674535   | 4.7499046   | 2.4700203   | 4.568433    | 2.4676828   | 5.98251     |
| "Kdm6a"   | 7.991724    | 7.3950087   | 7.79143575  | 6.7312105   | 8.5994065   | 7.3546905   | 7.48652915  | 6.9272115   |
| "Kdr"     | 6.308694    | 5.3469324   | 6.5759697   | 6.4495015   | 6.4725785   | 7.253059    | 7.199415    | 6.6273932   |
| "Keap1"   | 6.118029    | 6.5006115   | 6.1126973   | 6.3897565   | 5.9067777   | 6.5656083   | 6.2688405   | 6.10043515  |
| "Keg1"    | 5.266463    | 1.9512166   | 1.8832788   | 1.9437498   | 1.8886093   | 1.8718053   | 1.8886871   | 1.9514158   |
| "Kera"    | 5.042867    | 3.933592    | 9.294535    | 8.168465    | 3.7850428   | 4.214164    | 4.2539163   | 8.542464    |
| "Khdc1a"  | 2.7151704   | 2.891525    | 2.7987444   | 2.9592342   | 2.8080423   | 2.753294    | 2.7948062   | 2.9159744   |
| "Khdc1b"  | 2.41398095  | 2.58247305  | 2.4578445   | 2.5770382   | 2.46810295  | 2.41971785  | 2.4566027   | 2.5506861   |
| "Khdrbs1" | 6.233485214 | 6.693764957 | 6.6083857   | 6.683853543 | 6.524133971 | 6.4698771   | 6.738571514 | 6.686448171 |
| "Khdrbs2" | 2.4732916   | 2.5620937   | 2.5087132   | 2.6071408   | 2.5109248   | 2.4689312   | 2.507069    | 2.601415    |
| "Khdrbs3" | 6.498581    | 4.830254    | 5.7612696   | 6.400851    | 6.0249453   | 4.5680265   | 6.0305877   | 6.898663    |
| "Khk"     | 7.281108    | 6.0483828   | 5.8691845   | 5.6741004   | 6.073751    | 5.874462    | 6.3862166   | 5.350236    |
| "Kif11"   | 2.44090575  | 2.5615163   | 2.48151325  | 2.5924009   | 2.48839425  | 2.4355787   | 2.4746039   | 2.59248725  |
| "Kif12"   | 2.4411526   | 2.5095236   | 2.4585729   | 2.5677671   | 2.4546762   | 2.3961477   | 2.452692    | 2.5563226   |
| "Kif13a"  | 6.336083    | 6.6458583   | 6.5069613   | 6.73362     | 6.46508     | 6.2813077   | 6.5051765   | 6.6701164   |
| "Kif16b"  | 7.800434    | 7.991776    | 8.3011115   | 9.072436    | 8.286689    | 7.53771925  | 8.2509485   | 9.294305    |
| "Kif17"   | 2.44755815  | 2.48965165  | 2.4734684   | 2.5166808   | 2.4595517   | 2.43826675  | 2.4648483   | 2.52232945  |
| "Kif18a"  | 2.923177    | 3.2746592   | 3.1421316   | 3.3334875   | 3.129724    | 3.0966227   | 3.1315777   | 3.2591224   |
| "Kif1a"   | 2.526943    | 2.6761107   | 2.563782    | 2.6863298   | 2.5646808   | 2.5250418   | 2.5393186   | 2.6600409   |
| "Kif1b"   | 7.955052357 | 8.085952671 | 8.885954    | 9.037419071 | 8.606802571 | 7.909331886 | 8.888661    | 8.860249229 |
| "Kif1c"   | 7.557273333 | 8.531008333 | 8.236522333 | 8.623727533 | 7.774748767 | 7.720477567 | 8.0215708   | 8.468127333 |
| "Kif20a"  | 2.6682963   | 2.825068    | 2.732654    | 2.8261395   | 2.7464156   | 2.684852    | 2.732054    | 2.8126004   |
| "Kif21a"  | 8.70794     | 7.854702    | 7.965144    | 7.9789233   | 7.4034085   | 7.158386    | 7.638135    | 8.070604    |
| "Kif21b"  | 2.3416686   | 2.4082587   | 2.3870993   | 2.5144866   | 2.3989606   | 2.3499877   | 2.384791    | 2.4566767   |
| "Kif22"   | 4.25552633  | 4.382171867 | 4.354781667 | 4.479388767 | 4.350821033 | 4.308804033 | 4.339936767 | 4.447692533 |
| "Kif23"   | 2.8008312   | 3.009217567 | 2.894282767 | 3.0311927   | 2.899977567 | 2.885062133 | 2.8593267   | 2.978129133 |
| "Kif2a"   | 4.989014367 | 5.2905546   | 5.432508867 | 5.450389333 | 5.4604554   | 5.411635467 | 5.313922467 | 5.813154733 |
| "Kif2c"   | 2.57102955  | 2.6350571   | 2.66500875  | 2.68401865  | 2.59714195  | 2.5667584   | 2.5801536   | 2.665939    |
| "Kif3a"   | 4.2027128   | 4.0044055   | 4.3636989   | 4.15763175  | 4.1509205   | 3.7082702   | 4.66417055  | 4.27785435  |

|           |             |             |             |             |             |             |             |             |
|-----------|-------------|-------------|-------------|-------------|-------------|-------------|-------------|-------------|
| "Kif3b"   | 2.623492767 | 2.688229367 | 2.6983384   | 2.720183933 | 2.698724333 | 2.687922033 | 2.656664933 | 2.609460333 |
| "Kif3c"   | 6.5391517   | 6.9463997   | 7.336524    | 7.943632    | 6.7882586   | 6.732842    | 6.894827    | 7.77815     |
| "Kif5a"   | 2.6222563   | 2.761855    | 2.6973667   | 2.8385506   | 2.7032557   | 2.6516497   | 2.6964047   | 2.8151693   |
| "Kif5b"   | 9.7061192   | 9.729802    | 9.7695076   | 9.9751274   | 9.7368724   | 9.5237888   | 10.005284   | 10.0906634  |
| "Kif5c"   | 2.7438009   | 2.895918    | 2.8110473   | 2.967352    | 2.8228009   | 2.7722178   | 2.8101606   | 2.8639016   |
| "Kif9"    | 2.293365    | 2.3456478   | 2.3198717   | 2.619369    | 2.3292196   | 2.2839563   | 2.314422    | 2.3760529   |
| "Kifap3"  | 7.4980855   | 8.06609765  | 7.9860182   | 8.0267475   | 7.7158028   | 7.39991785  | 7.8076823   | 8.0791496   |
| "Kifc2"   | 2.7885281   | 2.90945145  | 2.84944805  | 2.9796616   | 2.8712796   | 2.85306705  | 2.873577    | 2.96399535  |
| "Kifc3"   | 5.5245323   | 6.0802617   | 6.0495687   | 6.330765    | 6.056017    | 5.8304024   | 6.2341146   | 6.2120275   |
| "Kifc5b"  | 2.337457    | 2.4299397   | 2.394146    | 2.4827628   | 2.3877308   | 2.3752503   | 2.384325    | 2.4738984   |
| "Kin"     | 6.652959    | 7.564196    | 6.610306    | 6.77715     | 7.306787    | 7.5702224   | 6.685165    | 6.884731    |
| "Kirrel"  | 2.4345255   | 2.4874318   | 2.4639673   | 2.5850024   | 2.465094    | 2.4211335   | 2.4631164   | 2.5712812   |
| "Kit"     | 2.62745985  | 2.70703745  | 2.6662876   | 2.7747955   | 2.7444972   | 2.65446855  | 2.6743328   | 2.7989329   |
| "Kitl"    | 5.06322485  | 5.836096625 | 5.773469325 | 5.9093518   | 5.8558963   | 6.25661865  | 5.85747     | 6.073971575 |
| "Klb"     | 4.72204     | 2.5489192   | 2.4721658   | 2.4951324   | 3.6233525   | 5.68442     | 4.713916    | 2.246633    |
| "Klc1"    | 6.98223735  | 7.2336361   | 6.814446    | 6.8353632   | 6.984222    | 7.064934    | 7.09355375  | 6.82583975  |
| "Klc3"    | 2.12631     | 2.487731    | 2.3998363   | 2.4400616   | 2.4709005   | 2.3795133   | 2.384215    | 2.4247792   |
| "Klc4"    | 3.80853925  | 3.67782625  | 3.7086032   | 3.7735119   | 3.61678015  | 3.481771    | 3.75123555  | 3.7725167   |
| "Klf10"   | 8.814038    | 9.571038    | 8.763335    | 8.212016    | 9.217418    | 8.24121     | 9.798875    | 9.276662    |
| "Klf13"   | 8.2708085   | 7.3754759   | 7.65010715  | 7.370174    | 7.8811067   | 7.87130125  | 7.886686    | 7.19125365  |
| "Klf15"   | 11.38657    | 11.105739   | 8.581217    | 8.21762     | 10.849718   | 11.1487255  | 9.346813    | 9.005856    |
| "Klf16"   | 2.4489639   | 2.4727266   | 2.5097017   | 2.5231855   | 2.469199    | 2.4330754   | 2.4549778   | 2.59903     |
| "Klf17"   | 2.3405244   | 2.441149    | 2.40526     | 2.507555    | 2.4029112   | 2.3845212   | 2.393794    | 2.4752681   |
| "Klf2"    | 7.7705417   | 7.724466    | 7.292036    | 7.7654514   | 8.294521    | 8.934275    | 8.092358    | 7.6633162   |
| "Klf3"    | 5.0012745   | 3.902740367 | 4.4162214   | 3.9601043   | 4.196317733 | 4.655028833 | 4.38619567  | 4.0640797   |
| "Klf4"    | 8.946087    | 7.48303525  | 8.4774153   | 7.6153175   | 7.986978    | 8.779828    | 7.7558405   | 7.61477     |
| "Klf5"    | 4.4901535   | 4.6888515   | 4.7720629   | 4.407559    | 4.72551045  | 4.58235175  | 4.5127551   | 4.40499255  |
| "Klf6"    | 9.399265333 | 9.2165388   | 7.618382667 | 7.805053433 | 8.920016833 | 9.0270591   | 8.004644233 | 8.076598767 |
| "Klf7"    | 6.7018096   | 6.585995475 | 7.035280925 | 6.87504605  | 6.7575099   | 7.0099774   | 6.869689975 | 7.095624475 |
| "Klf9"    | 9.941940271 | 10.25913664 | 9.166062486 | 9.456596643 | 10.04678507 | 9.820912771 | 9.082571857 | 9.5185917   |
| "Klhdc2"  | 9.7070445   | 10.014321   | 10.291238   | 10.541148   | 10.005415   | 10.0841145  | 10.044716   | 10.689409   |
| "Klhdc3"  | 6.70822715  | 7.237734475 | 7.493655    | 7.538465325 | 7.395885375 | 7.050561475 | 7.082953    | 7.3673402   |
| "Klhdc4"  | 3.8801522   | 4.1841745   | 3.9600036   | 4.203933    | 3.996341    | 3.756173    | 3.9567733   | 4.068067    |
| "Klhdc5"  | 3.4157631   | 3.1807559   | 5.3343406   | 4.6957765   | 4.445756    | 5.1857114   | 4.5568814   | 4.554094    |
| "Klhdc8a" | 2.720982    | 2.7588265   | 2.722762    | 2.7882254   | 2.7273731   | 2.6980178   | 2.7291126   | 2.7677999   |
| "Klhl1"   | 2.4999895   | 2.618861    | 2.5723298   | 2.7637353   | 2.57283     | 2.4705367   | 2.5709355   | 2.6670642   |
| "Klhl11"  | 2.3128374   | 2.3716023   | 2.366402    | 2.4132786   | 2.366525    | 2.3515615   | 2.4112642   | 2.4137094   |
| "Klhl13"  | 5.6627153   | 4.84038625  | 6.03026915  | 5.2392562   | 5.74982895  | 5.24927585  | 6.077791    | 5.4533925   |
| "Klhl2"   | 6.4145846   | 6.659972    | 5.0512385   | 5.8936872   | 6.516465    | 7.368141    | 6.3797927   | 6.48505     |
| "Klhl21"  | 9.806278    | 10.47856    | 9.4143      | 9.928049    | 10.409979   | 10.272668   | 9.227005    | 10.198172   |
| "Klhl22"  | 8.569492    | 8.5349455   | 8.492339    | 8.451455    | 8.893777    | 8.7694435   | 8.562006    | 8.587808    |
| "Klhl24"  | 8.112613    | 9.123568    | 7.226949    | 7.5073075   | 8.369158    | 8.617661    | 6.838458    | 7.532291    |
| "Klhl26"  | 3.8115044   | 4.246342    | 4.7554274   | 3.9197344   | 4.215362    | 4.17838     | 4.1804357   | 4.1827254   |
| "Klhl5"   | 7.0138273   | 6.344821    | 7.408498    | 6.9354442   | 8.006145    | 7.502282    | 7.694534    | 7.0819073   |
| "Klhl7"   | 9.175118    | 10.124435   | 8.8673565   | 9.3115845   | 9.865045    | 10.005343   | 8.6734635   | 9.4232535   |
| "Klhl9"   | 10.019562   | 9.913413    | 9.982324    | 10.160195   | 10.140189   | 10.054079   | 9.969794    | 10.246099   |
| "Klk1"    | 3.186450233 | 3.3044595   | 7.498212    | 3.374704    | 3.3710254   | 4.4039791   | 3.232317733 | 3.317427767 |
| "Klk10"   | 2.557102    | 2.6519828   | 2.5822937   | 2.70283     | 2.5864236   | 2.5323133   | 2.5790472   | 2.6917129   |
| "Klk1b1"  | 2.3307033   | 2.4590287   | 2.4062467   | 2.5678759   | 2.4058616   | 2.3256721   | 2.4086242   | 2.5078855   |
| "Klk1b11" | 2.4212198   | 2.5277135   | 2.4927647   | 2.5866055   | 2.494387    | 2.4546208   | 2.4892254   | 2.772127    |
| "Klk1b16" | 2.5542104   | 2.7023811   | 2.644143    | 2.7634554   | 2.6459637   | 2.5919883   | 2.6434278   | 2.7225692   |
| "Klk1b21" | 4.072784    | 4.2596774   | 4.4592667   | 4.261155    | 4.133192    | 4.070914    | 4.09191     | 4.165842    |
| "Klk1b22" | 2.7662525   | 4.237028    | 5.080258    | 2.8325393   | 2.7764018   | 2.757831    | 2.7676659   | 2.8336637   |
| "Klk1b24" | 2.330508    | 2.4108994   | 2.3430712   | 2.4110172   | 2.345304    | 2.314569    | 2.3287735   | 2.4009964   |
| "Klk1b27" | 2.78437     | 2.900236    | 2.8342142   | 3.0207973   | 2.8421888   | 2.7879722   | 2.8342142   | 2.9495313   |
| "Klk1b3"  | 2.4507809   | 2.5561192   | 2.4941359   | 2.6210618   | 2.5007114   | 2.4492245   | 2.492649    | 2.60505     |
| "Klk1b4"  | 2.59569705  | 2.73414695  | 2.6539364   | 2.8100535   | 2.66354145  | 2.6541824   | 2.65131735  | 2.7785014   |
| "Klk1b5"  | 2.2846675   | 2.3644454   | 2.3323045   | 2.4227178   | 2.332645    | 2.295714    | 2.3249884   | 2.413829    |
| "Klk1b8"  | 3.875395    | 4.2718654   | 3.996965    | 4.082886    | 4.0161824   | 3.9134943   | 3.9928992   | 4.0507846   |
| "Klk6"    | 2.3487923   | 2.399265    | 2.3637822   | 2.47672     | 2.3643873   | 2.332572    | 2.363697    | 2.4450712   |
| "Klk7"    | 2.1981611   | 2.2398245   | 2.5022569   | 2.24315     | 2.207161    | 2.1471252   | 2.1898708   | 2.2709308   |
| "Klk8"    | 2.504129    | 2.5074606   | 2.4964893   | 2.5101085   | 2.4943607   | 2.5948026   | 2.493668    | 2.5372808   |
| "Klkb1"   | 7.6555657   | 2.497179    | 2.520083    | 2.5408564   | 2.4517531   | 2.387748    | 2.4455595   | 2.5274205   |
| "Klra1"   | 2.73322095  | 2.87678975  | 2.81780465  | 2.9645284   | 2.81890285  | 2.7397287   | 2.80088975  | 2.91903375  |
| "Klra12"  | 2.6543883   | 2.843187    | 2.732422    | 2.8778716   | 2.73912285  | 2.6969859   | 2.7275622   | 2.8467859   |
| "Klra14"  | 2.976521    | 3.2533672   | 3.0995197   | 3.3018773   | 3.1132388   | 3.007453    | 3.0894864   | 3.2427063   |
| "Klra15"  | 2.655558    | 2.801619    | 2.7164109   | 2.8791409   | 2.7253222   | 2.6715493   | 2.721449    | 2.8543818   |
| "Klra16"  | 2.9473013   | 3.3970756   | 3.1801422   | 3.35454475  | 3.1871018   | 3.07570625  | 3.16785285  | 3.29114145  |
| "Klra17"  | 2.3309891   | 2.3899868   | 2.353214    | 2.4441512   | 2.3584487   | 2.7241066   | 2.3526967   | 2.4362466   |
| "Klra18"  | 3.740258    | 4.050231    | 6.5902553   | 4.1214733   | 4.0098352   | 3.7962077   | 3.9352067   | 4.0613737   |
| "Klra19"  | 2.471922    | 2.6055841   | 2.5201094   | 2.692771    | 2.5343182   | 2.4744601   | 2.5198395   | 2.635889    |
| "Klra2"   | 2.674644    | 2.8767297   | 2.7000775   | 2.860972    | 2.717898    | 2.6650867   | 2.715218    | 2.8122315   |
| "Klra20"  | 2.6681626   | 2.8107884   | 2.7231398   | 2.8622067   | 2.732851    | 2.6624346   | 2.717749    | 2.8380072   |
| "Klra5"   | 2.346051    | 2.4029846   | 2.366304    | 2.487114    | 2.3879833   | 2.3409598   | 2.35776     | 2.471039    |
| "Klra7"   | 2.943908    | 3.1401107   | 3.0388258   | 3.1977987   | 3.0242038   | 2.9237447   | 3.0055304   | 3.086228    |
| "Klraq1"  | 6.092622    | 6.157926    | 5.964793    | 5.8973355   | 6.26125     | 7.489044    | 6.109793    | 6.2006555   |
| "Klrb1a"  | 3.0321918   | 3.1164927   | 3.0864034   | 3.1586747   | 3.0833309   | 2.9790595   | 3.088266    | 3.1397626   |
| "Klrb1b"  | 2.960289767 | 3.183879667 | 3.046039967 | 3.2218632   | 3.066880567 | 2.9703343   | 3.032915433 | 3.166963367 |
| "Klrb1f"  | 2.2549677   | 2.370926    | 2.3067682   | 2.4343276   | 2.3340511   | 2.2878885   | 2.3317947   | 2.4393144   |
| "Klrc1"   | 2.5580904   | 2.70205     | 2.6060984   | 2.7345426   | 2.6145513   | 2.5792174   | 2.606537    | 2.716749    |
| "Klrc2"   | 2.7976863   | 2.9938416   | 2.8848407   | 3.0746832   | 2.8989706   | 2.8128414   | 2.8799777   | 3.0140395   |

|             |             |             |             |             |             |             |             |             |
|-------------|-------------|-------------|-------------|-------------|-------------|-------------|-------------|-------------|
| "Klrc3"     | 2.316123    | 2.396768    | 2.349815    | 2.4824545   | 2.3513374   | 2.3122618   | 2.348836    | 2.446504    |
| "Klrd1"     | 2.3343606   | 2.3664231   | 2.346737    | 2.4244964   | 2.347259    | 3.8185637   | 2.3276312   | 2.4109697   |
| "Kmo"       | 7.0845637   | 2.5511935   | 2.515208    | 2.5020475   | 2.4990525   | 2.7015593   | 2.5136337   | 2.6010923   |
| "Kng1"      | 11.5808585  | 2.65457085  | 3.92628935  | 2.7119481   | 2.9177362   | 2.599336    | 2.6380194   | 3.38385175  |
| "Kpna1"     | 7.54161816  | 7.8000823   | 7.96127466  | 8.0218688   | 7.39533474  | 7.60859948  | 7.85500446  | 7.90157766  |
| "Kpna2"     | 7.69155     | 8.178259    | 8.134452    | 8.429562    | 8.3986025   | 8.603163    | 7.8108444   | 8.283039    |
| "Kpna3"     | 8.098374333 | 8.230223833 | 8.561579667 | 8.921117167 | 8.109981    | 7.886744333 | 8.686157333 | 9.0006531   |
| "Kpna4"     | 10.059716   | 10.652137   | 10.720485   | 11.014293   | 10.512549   | 10.648468   | 10.7471895  | 10.863548   |
| "Kpna6"     | 6.12547495  | 6.50505935  | 6.5615785   | 6.72284815  | 6.6034585   | 6.36886015  | 6.57585485  | 6.6237705   |
| "Kpnb1"     | 6.328398525 | 6.45263475  | 6.28079145  | 6.3745313   | 6.416314225 | 6.36877025  | 6.4863223   | 6.578003    |
| "Kptn"      | 5.0221      | 5.056347    | 5.0496235   | 5.0882587   | 5.0513325   | 5.020509    | 5.044007    | 5.2802606   |
| "Kras"      | 5.33158055  | 4.954757575 | 5.19783135  | 5.17822655  | 5.055668075 | 5.07905775  | 5.234461625 | 5.21257915  |
| "Krba1"     | 4.767113    | 5.59156     | 5.434043    | 5.8343635   | 5.3861694   | 4.550113    | 5.2896814   | 5.5542746   |
| "Krc1"      | 6.489055    | 6.187004    | 6.768286    | 6.712892    | 6.5076      | 6.460261    | 7.1130605   | 5.7082105   |
| "Kri1"      | 6.2810836   | 6.511369    | 5.712123    | 5.7666836   | 6.5694547   | 6.9298515   | 5.9979773   | 5.827869    |
| "Krit1"     | 5.6717057   | 6.3811417   | 6.25776     | 6.975525    | 6.527195    | 6.586503    | 6.299487    | 7.1737685   |
| "Krr1"      | 6.2945804   | 7.74342565  | 6.03722535  | 6.4437369   | 6.517167    | 7.21786775  | 6.165678    | 6.56086     |
| "Krt1"      | 1.9940134   | 2.027122    | 5.1148005   | 2.06592     | 2.005806    | 1.9413295   | 1.9618852   | 2.0456913   |
| "Krt10"     | 9.184368    | 5.667354    | 11.72377    | 7.1096144   | 5.840306    | 5.3767686   | 6.5848904   | 6.618846    |
| "Krt12"     | 2.2589002   | 2.3331807   | 2.4726086   | 2.3786128   | 2.289109    | 2.2486715   | 2.2825027   | 2.3722043   |
| "Krt13"     | 2.335451    | 2.419407    | 2.3838512   | 2.48173965  | 2.37677955  | 2.34591185  | 2.37284925  | 2.4617686   |
| "Krt14"     | 2.66565455  | 2.0825694   | 4.8758459   | 2.109367    | 2.0460966   | 2.0209419   | 2.07204315  | 2.121731    |
| "Krt15"     | 2.7128282   | 2.5129046   | 5.4335175   | 2.5750532   | 2.488162    | 2.4116719   | 2.4862523   | 2.5617723   |
| "Krt17"     | 2.4798728   | 2.57707315  | 2.6404349   | 2.660959    | 2.5456774   | 2.5088862   | 2.5344038   | 2.62786425  |
| "Krt18"     | 8.101726    | 2.6989958   | 3.74163     | 2.7344537   | 2.6254187   | 2.4405172   | 4.819603    | 2.7292004   |
| "Krt19"     | 3.1441998   | 2.3863435   | 2.360506    | 2.4344602   | 2.3589683   | 2.3325      | 2.3442597   | 2.4340048   |
| "Krt2"      | 2.3135455   | 2.4158688   | 2.349534    | 2.4680912   | 2.351646    | 2.3171315   | 2.3338993   | 2.4381628   |
| "Krt23"     | 2.9691708   | 3.0957606   | 3.5210805   | 3.1555874   | 3.0611508   | 2.9686172   | 3.0206442   | 3.14505     |
| "Krt25"     | 3.300455    | 3.5476897   | 3.4596243   | 3.6289408   | 3.4713366   | 3.4151452   | 3.4608285   | 3.591211    |
| "Krt27"     | 2.504931    | 2.61698     | 2.5489013   | 2.6384885   | 2.5545347   | 2.5204327   | 2.5497544   | 2.6340857   |
| "Krt36"     | 2.9381337   | 3.190578    | 2.9662268   | 3.0399964   | 2.9693584   | 2.9312806   | 2.938404    | 3.0160844   |
| "Krt5"      | 4.113303    | 3.7419164   | 5.404918    | 3.7320943   | 3.6307633   | 3.4861393   | 3.4913716   | 4.127218    |
| "Krt6a"     | 2.1702114   | 2.2337014   | 2.4570969   | 2.27811025  | 2.1942738   | 2.18687795  | 2.194985    | 2.26549815  |
| "Krt7"      | 2.6179237   | 2.690728    | 2.66036     | 2.7213092   | 2.6325128   | 2.6217709   | 2.6572187   | 2.7201755   |
| "Krt75"     | 2.4128902   | 2.4711957   | 2.4513574   | 2.5230002   | 2.4518561   | 2.4263272   | 2.4358785   | 2.5156717   |
| "Krt77"     | 5.308249    | 2.186454    | 8.503264    | 2.2303784   | 2.1591094   | 2.135974    | 2.1530895   | 2.2294953   |
| "Krt79"     | 3.1350017   | 3.199568    | 5.6551523   | 3.1700523   | 3.1516004   | 3.1251752   | 3.060834    | 3.1328      |
| "Krt8"      | 6.232623167 | 2.256452167 | 2.240501133 | 2.292183467 | 2.231746733 | 2.172398433 | 2.297929833 | 2.281169733 |
| "Krt80"     | 3.3041906   | 2.723032    | 2.7040222   | 2.7090456   | 2.7009473   | 2.6882734   | 2.6996694   | 2.7111564   |
| "Krt81"     | 2.5683405   | 2.7734911   | 2.7017353   | 2.64359     | 2.6077213   | 2.4316347   | 2.6025007   | 2.6393147   |
| "Krtap12-1" | 2.4027803   | 2.4508166   | 2.4289455   | 2.5181692   | 2.4266415   | 2.3673913   | 2.4250672   | 2.4852235   |
| "Krtap16-1" | 2.370318    | 2.4629261   | 2.414493    | 2.526125    | 2.4157624   | 2.3844736   | 2.4132366   | 2.4943473   |
| "Krtap16-2" | 2.3891726   | 2.4952111   | 2.401991    | 2.5255094   | 2.404159    | 2.365821    | 2.399693    | 2.4646394   |
| "Krtap16-3" | 2.3919084   | 2.48987365  | 2.43236065  | 2.5539086   | 2.4415584   | 2.39094165  | 2.4308221   | 2.5402092   |
| "Krtap16-5" | 2.4363751   | 2.5822754   | 2.4846892   | 2.6062682   | 2.4852176   | 2.4390278   | 2.4839566   | 2.5732882   |
| "Krtap16-7" | 2.8090222   | 2.9864633   | 2.890352    | 2.9999096   | 2.9127612   | 2.8521006   | 2.9111047   | 2.9923716   |
| "Krtap3-1"  | 2.409753    | 2.6122556   | 2.426211    | 2.705438    | 2.4544022   | 2.3996418   | 2.4225936   | 2.0224934   |
| "Krtap4-2"  | 2.9112298   | 3.1249926   | 3.0292091   | 3.157808    | 3.0446944   | 2.9804037   | 3.0315309   | 3.1512363   |
| "Krtap6-3"  | 2.3873804   | 2.4785423   | 2.4244215   | 2.504031    | 2.427694    | 2.4051867   | 2.417711    | 2.527975    |
| "Krtap9-3"  | 2.527762    | 2.6396127   | 2.5872355   | 2.7022269   | 2.5901086   | 2.5461535   | 2.567622    | 2.6999292   |
| "Krtcap2"   | 9.52494575  | 9.3477395   | 9.855986    | 9.5661745   | 9.4805265   | 9.2881605   | 9.964507    | 9.638365    |
| "Krtdap"    | 6.5134025   | 2.297905    | 8.681684    | 2.3563704   | 2.2736437   | 2.2454195   | 2.2237215   | 2.3339849   |
| "Ksr1"      | 7.736412    | 8.7769375   | 8.633007    | 8.204617    | 7.923559    | 7.4727874   | 8.561687    | 8.18911     |
| "Kti12"     | 8.283087    | 8.596831    | 8.106104    | 7.9002438   | 8.2441      | 8.239       | 8.117094    | 7.971587    |
| "Ktn1"      | 11.96038    | 11.992064   | 12.169569   | 12.154464   | 12.033256   | 11.723691   | 12.094938   | 12.323767   |
| "L1cam"     | 2.4543239   | 2.491426    | 2.46535675  | 2.5420065   | 2.47233045  | 2.4498327   | 2.4713508   | 2.54125615  |
| "L2hgdh"    | 7.996957    | 8.320554    | 8.5114765   | 8.705465    | 8.377204    | 8.130644    | 8.285736    | 8.690587    |
| "l7Rn6"     | 9.213859    | 9.204681    | 10.135625   | 10.17853725 | 9.3235485   | 9.3013865   | 9.9908435   | 10.21989    |
| "Lace1"     | 5.452821    | 4.2157626   | 5.550321    | 5.667115    | 5.4449577   | 4.755997    | 5.4845104   | 5.7260585   |
| "Lactb"     | 8.226709    | 8.552046    | 9.050111    | 9.149154    | 8.449003    | 8.308153    | 8.751783    | 9.154255    |
| "Lactb2"    | 6.03680635  | 5.351217    | 5.5283296   | 5.82022315  | 5.6956985   | 5.631415    | 5.83431315  | 5.9097355   |
| "Lad1"      | 2.134396    | 2.1557457   | 2.4724762   | 2.2017207   | 2.151419    | 2.1261418   | 2.1470723   | 2.1965213   |
| "Lage3"     | 8.036831    | 8.515347    | 8.938683    | 9.076658    | 8.3731165   | 7.764867    | 8.771033    | 8.694504    |
| "Lair1"     | 2.3569367   | 2.3951716   | 2.366315    | 2.4144962   | 2.3424094   | 2.3501341   | 2.3622856   | 2.415075    |
| "Lama1"     | 2.3237467   | 2.4459705   | 2.3792405   | 2.4699867   | 2.3617287   | 2.343629    | 2.3612294   | 2.458088    |
| "Lama2"     | 8.335315    | 8.436344    | 8.791993    | 8.599574    | 8.8479      | 8.904889    | 7.9637756   | 8.786191    |
| "Lama3"     | 2.1815343   | 2.252955    | 2.831769    | 2.363186    | 2.217708    | 2.2138197   | 2.1992505   | 2.2978508   |
| "Lama4"     | 6.934041    | 6.0053244   | 8.03688     | 7.497584    | 7.8277206   | 7.438152    | 8.027384    | 7.504172    |
| "Lama5"     | 4.22659435  | 4.468427    | 4.47960335  | 4.4074175   | 4.639096    | 4.2798043   | 4.4915655   | 4.35442065  |
| "Lamb1"     | 5.6123616   | 5.053607233 | 6.227031767 | 5.692100233 | 6.236587    | 6.5987534   | 6.016918033 | 5.853762367 |
| "Lamb2"     | 7.3124824   | 7.5088973   | 8.297016    | 8.129167    | 8.320576    | 7.7057657   | 8.220475    | 8.612878    |
| "Lamb3"     | 2.8187523   | 2.9467142   | 2.842861    | 2.8891435   | 2.8521051   | 2.6998096   | 2.9728801   | 2.8845854   |
| "Lamc1"     | 5.08265245  | 5.01793565  | 6.00665915  | 5.62853025  | 5.5233863   | 5.4572627   | 5.3289887   | 5.5720091   |
| "Lamc2"     | 2.828856    | 2.91318265  | 2.8421346   | 2.9370854   | 2.86584855  | 3.0593756   | 2.8442994   | 2.89068365  |
| "Lamp1"     | 12.276733   | 11.954243   | 12.216374   | 12.058415   | 12.117855   | 11.985278   | 12.45692    | 12.121524   |
| "Lamp2"     | 10.66591    | 10.19959375 | 9.9257045   | 9.723205    | 10.43464813 | 10.6567045  | 10.14539013 | 9.940513    |
| "Lamp3"     | 9.195071    | 8.836618    | 9.251547    | 9.410767    | 9.267988    | 9.193539    | 9.373612    | 9.490412    |
| "Lamtor2"   | 9.765787    | 9.704964    | 10.315887   | 10.152874   | 9.687412    | 9.445497    | 10.283926   | 10.195549   |
| "Lamtor3"   | 8.881645    | 9.127534    | 9.000344    | 9.110063    | 9.330908    | 9.485754    | 9.141902    | 9.234874    |
| "Lanc1"     | 9.141755    | 9.510587    | 9.183902    | 9.658945    | 9.058691    | 9.048077    | 9.335492    | 9.488639    |
| "Lanc2"     | 4.120511467 | 4.362834467 | 4.158292967 | 4.266953367 | 4.118968133 | 4.075342733 | 4.152253433 | 4.3200826   |

|            |             |             |             |             |             |             |             |             |
|------------|-------------|-------------|-------------|-------------|-------------|-------------|-------------|-------------|
| "Lao1"     | 3.2916036   | 3.3688622   | 3.3274512   | 3.4473135   | 3.322516    | 3.3010418   | 3.3232236   | 3.4036987   |
| "Lap3"     | 9.424726    | 8.639858    | 8.915465    | 8.914818    | 8.875732    | 8.697212    | 9.283552    | 8.753711    |
| "Laptm4a"  | 11.702485   | 11.229429   | 12.125216   | 11.752708   | 11.940971   | 11.545629   | 12.094585   | 11.759895   |
| "Laptm4b"  | 7.5972413   | 7.420179133 | 9.020808    | 8.926800333 | 8.272658333 | 7.7260175   | 8.845598667 | 8.944824333 |
| "Laptm5"   | 6.0115889   | 3.841853867 | 5.047472033 | 4.210386033 | 5.044422733 | 6.7339099   | 5.599410467 | 4.602090133 |
| "Large"    | 4.9980991   | 4.8290667   | 4.9881613   | 5.30395     | 4.9828841   | 4.69887535  | 5.0947709   | 5.21850935  |
| "Larp1"    | 9.578614    | 10.189709   | 9.873925    | 9.848263    | 9.815031    | 10.044936   | 9.853207    | 9.8706455   |
| "Larp1b"   | 8.861721    | 8.607804    | 9.324058    | 9.358345    | 8.756106    | 8.769259    | 9.231291    | 9.295457    |
| "Larp4b"   | 8.9899595   | 9.1110555   | 9.568099    | 9.764325    | 9.195068    | 8.9802775   | 9.443641    | 9.623801    |
| "Larp6"    | 2.7810917   | 3.4826539   | 3.2394185   | 3.2768915   | 3.2020726   | 3.61305     | 3.150787    | 3.3779442   |
| "Larp7"    | 6.69138325  | 6.00244915  | 6.55702175  | 6.9870612   | 6.5311412   | 6.4026457   | 6.7174976   | 7.037771    |
| "Lars"     | 8.783707    | 9.609154    | 9.152308    | 9.129811    | 9.103794    | 9.3922      | 8.842869    | 9.218879    |
| "Las1l"    | 8.062965    | 8.587178    | 7.8733006   | 7.6545906   | 8.231638    | 8.259078    | 7.6597033   | 7.869247    |
| "Lasp1"    | 7.186076771 | 6.559653729 | 7.724721729 | 7.349903271 | 7.301114129 | 7.399040257 | 7.319229843 | 7.480538357 |
| "Lass2"    | 6.5036273   | 4.9155464   | 5.7857146   | 5.4535923   | 6.042961    | 6.0216217   | 5.8615346   | 5.6633177   |
| "Lass4"    | 2.705228867 | 2.934358433 | 3.140508    | 3.168166333 | 3.1643109   | 3.1055203   | 3.005462    | 3.158545767 |
| "Lass5"    | 6.8571486   | 6.9786234   | 7.746366    | 6.9969997   | 7.7358403   | 7.9922347   | 7.3159533   | 7.0141835   |
| "Lat"      | 2.4630127   | 2.5005293   | 2.4745579   | 2.540206    | 2.4685726   | 3.588367    | 2.4663804   | 2.529253    |
| "Lat2"     | 2.523427    | 2.6004226   | 2.566292    | 2.6592262   | 2.5631466   | 2.5152388   | 2.8405938   | 2.652232    |
| "Lats1"    | 2.675778    | 2.84113     | 2.7812846   | 2.909097    | 2.7870903   | 2.7353706   | 2.778866    | 2.880965    |
| "Lats2"    | 4.094570686 | 4.241037871 | 4.075203071 | 4.127965371 | 4.043523557 | 3.980500986 | 4.138796714 | 4.157188129 |
| "Lbh"      | 2.797989    | 3.2756696   | 2.9312568   | 2.9355512   | 2.9319332   | 2.910217    | 2.933029    | 3.0257678   |
| "Lbp"      | 10.017773   | 6.231234    | 7.923023    | 6.622669    | 7.184622    | 7.5298257   | 6.169279    | 6.694689    |
| "Lbr"      | 9.456192    | 10.048959   | 10.024927   | 10.034325   | 10.000842   | 10.091795   | 9.9117985   | 10.300421   |
| "Lbx1"     | 5.5581598   | 6.4727335   | 6.9406364   | 7.5077755   | 5.8709062   | 5.23417125  | 6.581002    | 6.70904285  |
| "Lcat"     | 6.219207    | 2.328957    | 2.29027     | 2.3436642   | 2.2960753   | 2.2266264   | 2.2778184   | 2.3302665   |
| "Lce1a1"   | 4.3364619   | 3.38048315  | 5.35532955  | 3.41081525  | 3.21757635  | 3.11821385  | 3.1909063   | 3.33301425  |
| "Lce1a2"   | 2.8953667   | 2.4993885   | 5.597868    | 2.5557926   | 2.4543731   | 2.4190102   | 2.4508564   | 2.5485013   |
| "Lce1b"    | 2.6878116   | 2.697932    | 4.177129    | 2.7391617   | 2.6766598   | 2.5556643   | 2.6926563   | 2.736967    |
| "Lce1d"    | 3.8263528   | 3.2675118   | 4.593141    | 3.3220475   | 3.2078393   | 3.0840025   | 3.148797    | 3.2632937   |
| "Lce1f"    | 3.600831    | 2.5910876   | 3.5822163   | 2.633335    | 2.5775528   | 2.5147824   | 2.5878375   | 2.628418    |
| "Lce1g"    | 2.5308444   | 2.6283355   | 2.5586007   | 2.655806    | 2.5620596   | 2.5274353   | 2.5593607   | 2.647968    |
| "Lce1h"    | 3.4340453   | 1.9866045   | 1.9735833   | 1.9817888   | 2.2870798   | 1.9707353   | 1.9139483   | 1.983438    |
| "Lce1i"    | 3.5903661   | 3.5059562   | 5.048541    | 3.5402129   | 3.4493744   | 3.4864497   | 3.5059853   | 3.536786    |
| "Lce1j"    | 3.0697784   | 3.3301864   | 3.1694462   | 3.367532    | 3.1785638   | 3.0896456   | 3.1506054   | 3.279254    |
| "Lck"      | 1.9415725   | 2.017905    | 2.0207353   | 2.0807767   | 1.9748682   | 6.13208     | 1.9701655   | 2.061849    |
| "Lclat1"   | 6.8701553   | 7.6566925   | 7.063484    | 7.0123396   | 6.7355776   | 6.98475     | 6.7838483   | 7.301866    |
| "Lcmt1"    | 8.045929    | 8.7728195   | 8.914701    | 8.798599    | 8.313652    | 7.6537833   | 9.006466    | 8.5321045   |
| "Lcmt2"    | 6.4828577   | 6.5013156   | 4.968177    | 5.3919163   | 6.28212     | 6.389413    | 5.5998974   | 5.140694    |
| "Lcn13"    | 2.7421794   | 2.2802513   | 2.239005    | 2.33556     | 2.2415736   | 2.2073293   | 2.237773    | 2.3259053   |
| "Lcn2"     | 12.55005    | 8.828214    | 6.7463813   | 3.3240538   | 7.045051    | 8.709157    | 5.7609024   | 3.5761342   |
| "Lcn3"     | 2.3619642   | 2.4452562   | 2.434626    | 2.5009327   | 2.4329286   | 2.3994296   | 2.4223442   | 2.482269    |
| "Lcn5"     | 2.5777383   | 2.7023673   | 2.6339223   | 2.717948    | 2.8046865   | 2.591194    | 2.634131    | 2.7498512   |
| "Lcor"     | 2.7545776   | 3.0190506   | 3.0395718   | 3.533849    | 2.9629216   | 2.9436085   | 3.0088687   | 3.0681207   |
| "Lcorl"    | 3.347436    | 3.1481473   | 3.6511157   | 3.4459844   | 3.2501552   | 3.440235    | 3.1929407   | 3.4689217   |
| "Lcp1"     | 5.0907302   | 2.98341205  | 4.6079763   | 4.2357054   | 4.32502435  | 6.1673581   | 5.09604075  | 4.3429589   |
| "Lcp2"     | 2.66572475  | 2.7012446   | 2.7039143   | 2.7617438   | 2.7025344   | 3.49552955  | 2.8242265   | 2.76282275  |
| "Ldb1"     | 4.313672    | 5.202584    | 4.340058    | 4.3884172   | 5.069775    | 5.173612    | 4.524455    | 4.368105    |
| "Ldb2"     | 4.4276834   | 4.841206    | 5.3962927   | 4.890326    | 5.081133    | 5.3186874   | 4.859772    | 4.8907895   |
| "Ldb3"     | 11.87713467 | 12.12495767 | 12.12306733 | 12.25483767 | 12.11326383 | 11.79386933 | 12.1277865  | 12.247954   |
| "Ldha"     | 14.1411     | 14.414127   | 14.724976   | 14.622824   | 14.345183   | 14.171799   | 14.472155   | 14.526352   |
| "Ldhb"     | 11.27517175 | 9.17402025  | 10.01633025 | 10.73849388 | 10.98922525 | 9.8518855   | 10.79562475 | 11.42039188 |
| "Ldlr"     | 8.05298     | 4.545113    | 5.62492     | 5.670895    | 5.4756994   | 5.060177    | 5.670293    | 5.4569507   |
| "Ldlrap1"  | 3.431993    | 3.1020193   | 3.436829    | 3.2209272   | 3.452503    | 3.1997313   | 3.294952    | 3.5671756   |
| "Ldoc1"    | 2.2318604   | 2.4931087   | 2.8815408   | 2.5422955   | 2.5579615   | 2.158466    | 2.4766955   | 3.0036404   |
| "Leap2"    | 2.4475946   | 2.491198    | 2.4523447   | 2.5385745   | 2.462866    | 2.4127953   | 2.4468734   | 2.5342174   |
| "Lect1"    | 2.5217342   | 2.1691637   | 2.1414182   | 2.2193513   | 2.1417644   | 2.1078134   | 2.331356    | 2.2171435   |
| "Lect2"    | 6.704752    | 2.1704779   | 2.1579983   | 2.1945786   | 2.1559632   | 2.0954509   | 2.1221116   | 2.196692    |
| "Lefty1"   | 2.376767    | 2.4622529   | 2.6422977   | 2.5336537   | 2.4217346   | 2.4242463   | 2.4381351   | 2.4812026   |
| "Lemd2"    | 7.570156    | 7.830889    | 6.77096     | 6.972022    | 7.781597    | 7.861579    | 7.1294575   | 6.6168776   |
| "Leng1"    | 5.627557    | 5.918463    | 5.9894366   | 6.15106     | 5.9935904   | 5.593066    | 6.0535636   | 5.8802752   |
| "Leng8"    | 5.0603127   | 5.696535    | 5.049845    | 4.9277086   | 5.500496    | 5.1326566   | 4.933773    | 4.805928    |
| "Lep"      | 2.413726    | 2.523169    | 6.567538    | 2.5602324   | 7.978571    | 2.4266174   | 4.5188127   | 2.5755618   |
| "Lepr"     | 5.30364205  | 3.1247544   | 2.9529745   | 3.231018    | 2.9732475   | 3.651597    | 2.5873666   | 3.29924085  |
| "Lepre1"   | 3.6362587   | 3.7154957   | 3.657395    | 3.7901559   | 3.6807598   | 3.65688065  | 3.6350508   | 3.76698065  |
| "Leprel2"  | 3.997684    | 4.0372343   | 5.9720836   | 4.4303746   | 5.0267067   | 4.323062    | 4.326904    | 4.8081856   |
| "Leprel4"  | 3.9538631   | 4.7942767   | 5.8895884   | 4.6760445   | 6.018888    | 4.9529448   | 4.3572426   | 4.910444    |
| "Leprot"   | 7.459461067 | 6.446873733 | 7.718486    | 7.394337833 | 7.3899035   | 7.3386407   | 7.460140333 | 7.529640933 |
| "Leprotl1" | 7.03353025  | 6.97828965  | 7.1217179   | 7.211399    | 6.9298565   | 7.0920662   | 7.6819111   | 7.137053    |
| "Letm1"    | 5.120944767 | 5.279534567 | 5.2206616   | 5.391082533 | 5.238933467 | 5.1284076   | 5.263608467 | 5.368609667 |
| "Letmd1"   | 4.6082234   | 5.067057    | 4.614091    | 4.8305306   | 5.255042    | 5.253918    | 5.0888577   | 4.7557206   |
| "Lfng"     | 2.7383094   | 2.8382103   | 2.788141    | 2.8553524   | 2.7876458   | 3.0745196   | 2.7830536   | 2.8453467   |
| "Lgals1"   | 13.2284275  | 12.178252   | 13.0974105  | 12.926254   | 12.5715935  | 12.037114   | 13.590239   | 12.785304   |
| "Lgals2"   | 2.53018225  | 2.67375005  | 2.81403875  | 2.71858585  | 3.72918325  | 2.6122378   | 4.4504385   | 2.7681165   |
| "Lgals3"   | 2.788328    | 3.0807796   | 2.970672    | 3.1846426   | 2.9940772   | 2.8441193   | 2.9465187   | 3.0992641   |
| "Lgals4"   | 11.417808   | 9.018131    | 8.954538    | 6.7659273   | 9.495537    | 9.429012    | 11.72635    | 7.071799    |
| "Lgals5"   | 5.4042015   | 2.53272     | 4.5643063   | 4.2133546   | 4.418913    | 5.2202997   | 6.519836    | 4.162877    |
| "Lgals6"   | 5.5140033   | 6.196204    | 5.2423463   | 5.484656    | 6.6288133   | 6.2589717   | 5.804161    | 5.9048567   |
| "Lgals7"   | 4.8228436   | 2.6188831   | 8.150141    | 2.7072835   | 2.6053317   | 2.5768747   | 2.602888    | 2.7231383   |
| "Lgals8"   | 6.96959085  | 6.0780449   | 5.95861015  | 6.19583845  | 6.1525557   | 6.3445511   | 6.34474265  | 6.1932261   |
| "Lgals9"   | 4.2426653   | 2.2004848   | 2.315147    | 2.3377275   | 2.1707578   | 2.2358851   | 2.4329333   | 2.3678372   |

|                |             |             |             |             |             |             |             |             |
|----------------|-------------|-------------|-------------|-------------|-------------|-------------|-------------|-------------|
| "Lgi1"         | 2.5473442   | 2.8376207   | 2.7768397   | 2.9016008   | 2.8323736   | 2.6949716   | 3.0908463   | 2.8810065   |
| "Lgi4"         | 3.3196204   | 3.412036    | 3.4101295   | 3.4856548   | 3.744108    | 3.2696605   | 3.4081223   | 3.4636161   |
| "Lgmn"         | 9.072192    | 6.6829863   | 7.7894664   | 7.0883055   | 8.024634    | 8.017981    | 8.85393     | 7.57315     |
| "Lgr6"         | 2.3981225   | 2.4254584   | 2.4030778   | 2.4748688   | 2.411547    | 2.3808453   | 2.4042113   | 2.5071337   |
| "Lhpp"         | 4.553764    | 4.498564    | 4.443719    | 4.2901416   | 4.314753    | 4.0483055   | 4.402162    | 4.395777    |
| "Lhx1"         | 2.5832293   | 2.7196946   | 2.6471016   | 2.7540202   | 2.646424    | 2.5896285   | 2.6429873   | 2.7314672   |
| "Lhx5"         | 2.444356    | 2.5352879   | 2.5064983   | 2.6290672   | 2.5072842   | 2.4781647   | 2.506118    | 2.5833573   |
| "Lhx6"         | 2.8161647   | 2.9037576   | 2.8556201   | 2.8759472   | 2.8563194   | 2.8144782   | 2.8556356   | 2.9534185   |
| "Lhx8"         | 2.685162    | 2.868961    | 2.7849507   | 2.9113886   | 4.393999    | 4.7219687   | 2.9503076   | 2.890267    |
| "Lhx9"         | 2.410239    | 2.44624925  | 2.4346062   | 2.49768005  | 2.43551505  | 2.40859495  | 2.43200265  | 2.490589    |
| "Lias"         | 9.276023    | 10.061939   | 9.393865    | 9.673975    | 9.613605    | 9.4108515   | 9.574727    | 9.405586    |
| "Lif"          | 2.281487    | 2.5307348   | 2.3471842   | 2.3985069   | 2.345348    | 2.2932224   | 2.3170507   | 2.4688623   |
| "Lifr"         | 9.3132655   | 7.23628165  | 7.4609608   | 7.11090265  | 7.9227774   | 7.9701665   | 6.99051285  | 7.657167    |
| "Lig1"         | 2.4923742   | 2.7217557   | 2.5314896   | 2.556152    | 2.5504656   | 2.558169    | 2.5478597   | 2.5912821   |
| "Lig3"         | 3.779694975 | 3.9754633   | 4.0098879   | 4.0685551   | 4.049067275 | 3.879197875 | 3.9897765   | 4.074484575 |
| "Lilrb3"       | 4.0826297   | 3.7407312   | 3.9548705   | 3.4596124   | 3.9651875   | 4.227424    | 4.264278    | 4.001331    |
| "Lima1"        | 5.40441767  | 4.894117    | 6.3779559   | 6.016521433 | 5.842310767 | 5.347700833 | 5.9962239   | 6.049251    |
| "Limch1"       | 9.1154395   | 9.730717    | 10.193659   | 9.8837115   | 9.7779565   | 9.3986855   | 9.7823595   | 10.0925555  |
| "Limd1"        | 9.098598    | 9.379116    | 8.958878    | 9.285458    | 9.20684     | 9.16576075  | 9.065939    | 9.1060235   |
| "Limd2"        | 3.6404982   | 2.7678144   | 3.7156454   | 2.8020503   | 3.058596    | 7.1174285   | 3.76965405  | 2.9137589   |
| "Lime1"        | 3.66794375  | 3.84246075  | 3.82766295  | 3.9320159   | 3.8095607   | 4.4578736   | 3.8491504   | 3.9768688   |
| "Limk1"        | 2.9465152   | 3.086722    | 3.0366512   | 3.1125032   | 2.9672804   | 2.93860685  | 2.91403835  | 3.0542105   |
| "Limk2"        | 4.8265915   | 5.0961485   | 5.096793    | 5.347018    | 4.863793    | 5.3186417   | 4.8888025   | 5.4393835   |
| "Lims1"        | 6.560654333 | 6.241263333 | 6.7718819   | 6.965984733 | 6.864058267 | 6.669753933 | 6.641184567 | 6.9487458   |
| "Lims2"        | 7.6568003   | 7.3245916   | 7.2087975   | 7.312128    | 8.1228075   | 8.160304    | 7.0724134   | 7.4603333   |
| "Lin28a"       | 2.4052541   | 2.4978528   | 2.4211302   | 2.5349393   | 2.43684     | 2.4019165   | 2.43507     | 2.5233521   |
| "Lin37"        | 2.8075666   | 2.9510877   | 2.9053178   | 2.9315956   | 2.9097726   | 2.8801568   | 3.3694868   | 2.9477222   |
| "Lin7b"        | 2.8397541   | 2.9886981   | 2.902483633 | 3.029049967 | 2.926532567 | 2.836598933 | 2.893852667 | 3.0134708   |
| "Lin7c"        | 6.734738133 | 7.017476433 | 6.6970349   | 6.8433763   | 6.903310867 | 6.822828    | 6.916826    | 6.854683633 |
| "Lin9"         | 4.243649    | 4.506818    | 4.4744854   | 4.820065    | 4.8961062   | 4.3456893   | 4.4350815   | 5.6150904   |
| "Lingo1"       | 2.2936192   | 2.5260017   | 2.3041086   | 2.3866727   | 2.3123796   | 2.2695708   | 2.3084757   | 2.386301    |
| "Lipa"         | 5.786281667 | 4.147960667 | 4.7941231   | 4.435032933 | 5.2245926   | 5.334206833 | 5.020659933 | 4.545102767 |
| "Lipc"         | 6.8024974   | 1.9750408   | 1.9523256   | 2.0341375   | 1.9520394   | 1.928804    | 1.949132    | 2.0207493   |
| "Lipe"         | 4.30964     | 5.3573494   | 5.6674976   | 3.5509083   | 7.9193273   | 8.222154    | 7.712311    | 5.1366816   |
| "Lipt1"        | 4.9186144   | 4.836558    | 4.9975805   | 5.594958    | 4.959841    | 4.481813    | 5.604043    | 4.8401604   |
| "Lipt2"        | 5.8104386   | 5.9174557   | 6.380549    | 6.759198    | 5.9154844   | 5.2681184   | 5.6438375   | 6.3273773   |
| "LitaF"        | 7.6777425   | 5.6498065   | 6.0104013   | 5.09311725  | 6.1018489   | 6.3006512   | 6.323421    | 5.13773185  |
| "Ligl1"        | 6.7207484   | 6.704718    | 6.732353    | 6.687154    | 7.279491    | 6.730984    | 7.0315204   | 6.7637043   |
| "Ligl2"        | 5.7575293   | 5.464645    | 4.7252064   | 4.940135    | 5.5631847   | 5.1699224   | 5.0501456   | 4.8706393   |
| "Lman1"        | 5.98420735  | 5.536764925 | 6.540392475 | 6.5575435   | 5.927365375 | 5.64273145  | 6.378000625 | 6.348476975 |
| "Lman2"        | 6.4642146   | 6.2334328   | 6.43821615  | 6.43469125  | 6.3143767   | 6.14227985  | 6.73839355  | 6.32036995  |
| "Lmbr1"        | 4.8071943   | 5.0599005   | 5.6622374   | 5.48426865  | 5.1428452   | 4.90611915  | 5.12017325  | 5.30232565  |
| "Lmbr1l"       | 2.61799     | 2.7128572   | 2.6366942   | 2.7414694   | 2.875865    | 2.9727104   | 2.515913    | 2.8382764   |
| "Lmbrd1"       | 8.0714143   | 7.9267505   | 7.5652935   | 7.49320615  | 7.73354765  | 7.9049665   | 7.5318435   | 7.609672    |
| "Lmcd1"        | 11.086249   | 10.098627   | 10.419938   | 10.33606    | 11.824758   | 11.245468   | 10.940071   | 10.542923   |
| "Lmf1"         | 3.972154    | 3.0934544   | 3.6690989   | 3.9223592   | 3.9961855   | 3.0994272   | 3.7167063   | 3.744031    |
| "Lmna"         | 4.716419325 | 4.449166975 | 4.846288025 | 4.541118325 | 4.578937075 | 4.45476655  | 4.87102825  | 4.5098921   |
| "Lmnb1"        | 3.3183597   | 3.3948275   | 3.7753185   | 3.67073475  | 3.29044445  | 3.3614396   | 3.4506154   | 3.52595575  |
| "Lmnb2"        | 2.5992222   | 2.6471786   | 2.620039    | 2.7175102   | 2.6125174   | 2.5962758   | 2.6168098   | 2.6958976   |
| "Lmo1"         | 4.792504    | 5.4505634   | 5.1787767   | 5.156027    | 5.6323533   | 5.546607    | 4.9525547   | 5.0445127   |
| "Lmo2"         | 6.413649    | 5.149147    | 7.2315464   | 6.6546893   | 7.009587    | 7.786153    | 7.154534    | 6.9030547   |
| "Lmo4"         | 7.397463    | 8.282826    | 7.579972    | 7.4264956   | 8.181435    | 8.223935    | 7.6185327   | 7.493348    |
| "Lmo7"         | 8.430229    | 8.85378     | 9.07526     | 9.37081     | 8.987047    | 7.922238    | 9.196531    | 9.593641    |
| "Lmod1"        | 3.4820993   | 3.721869    | 3.4716346   | 3.5191703   | 3.4699323   | 3.468722    | 3.467161    | 3.5120924   |
| "Lmod2"        | 13.133049   | 13.036059   | 11.004476   | 11.39284    | 12.754377   | 12.678174   | 11.647396   | 11.889953   |
| "Lnx1"         | 5.64618445  | 6.81069835  | 6.217966    | 6.246984    | 6.900854    | 6.5796818   | 6.425584    | 6.1520773   |
| "Lnx2"         | 5.883203    | 4.2523313   | 4.2594748   | 3.9903393   | 4.2636547   | 4.2868595   | 4.660108    | 3.67744     |
| "LOC100038937" | 2.4877133   | 2.59404     | 2.5496504   | 2.6582007   | 2.550855    | 2.4936726   | 2.5239677   | 2.6165802   |
| "LOC100038944" | 2.2127085   | 6.1996593   | 2.2429957   | 4.378235    | 2.7919824   | 2.8369954   | 2.789378    | 3.6733124   |
| "LOC100039014" | 2.6900444   | 2.762616    | 2.701326    | 2.8449864   | 2.663591    | 2.6424966   | 2.6984992   | 2.755882    |
| "LOC100043315" | 2.6921997   | 2.8779926   | 2.7598352   | 2.9121056   | 2.7699728   | 2.7013202   | 2.7621317   | 2.9003415   |
| "LOC100044627" | 12.22899613 | 12.2505566  | 12.0388425  | 11.87107225 | 12.12541485 | 12.13709383 | 12.3192325  | 12.06463925 |
| "LOC100044656" | 2.8055658   | 2.9437885   | 2.8760118   | 3.018044    | 2.8999817   | 2.7982302   | 2.8960845   | 2.9716284   |
| "LOC100044742" | 8.73366425  | 7.08870685  | 7.513558    | 7.326573    | 8.3861732   | 8.24945425  | 8.01034915  | 7.785912    |
| "LOC100044900" | 8.811204    | 8.965388    | 8.598946    | 8.442362    | 9.034135    | 9.198415    | 9.29932     | 8.4530525   |
| "LOC100045367" | 12.820464   | 12.68305    | 12.73879    | 12.438022   | 12.624469   | 12.843678   | 13.102761   | 12.488725   |
| "LOC100045924" | 4.407786    | 4.6209435   | 4.937789    | 4.3169575   | 4.75091     | 4.7582216   | 4.8730474   | 4.922466    |
| "LOC100045999" | 9.32612395  | 9.42241665  | 9.477312167 | 9.7567509   | 9.243702    | 9.293339583 | 9.737466717 | 9.754533333 |
| "LOC100046151" | 13.7213745  | 13.733431   | 13.832759   | 13.930937   | 13.912204   | 13.718372   | 13.782596   | 13.908039   |
| "LOC100046187" | 7.664173    | 2.3337493   | 2.2922275   | 2.373713    | 2.2947245   | 2.2260094   | 2.289578    | 2.45842     |
| "LOC100046223" | 13.2576525  | 13.3777435  | 13.164074   | 12.9226475  | 13.188101   | 13.188136   | 13.45641725 | 13.043775   |
| "LOC100046297" | 12.913498   | 13.0454235  | 13.030093   | 12.805434   | 12.880002   | 12.719553   | 13.123124   | 12.594116   |
| "LOC100046628" | 11.416599   | 11.533873   | 11.0981935  | 11.04618    | 11.4635425  | 11.4727165  | 11.379108   | 11.2315015  |
| "LOC100046650" | 8.401843167 | 7.4765747   | 8.456114    | 7.7972118   | 8.059968533 | 8.437520333 | 8.444988333 | 7.971113833 |
| "LOC100046899" | 2.5002806   | 2.6546881   | 2.6602798   | 2.82238     | 2.6587565   | 2.5478446   | 2.6576297   | 2.7841334   |
| "LOC100047252" | 4.31401435  | 3.82920015  | 4.53302915  | 3.346641    | 5.2780992   | 4.65964135  | 5.9609438   | 3.9935874   |
| "LOC100047468" | 2.3261106   | 2.4160862   | 2.3571758   | 2.4514115   | 2.3577838   | 2.3286872   | 2.3575335   | 2.421682    |
| "LOC100047518" | 7.461899    | 7.2705077   | 8.3727151   | 7.81535     | 8.1980597   | 7.914238    | 8.3714403   | 7.985729    |
| "LOC100048268" | 4.044654    | 3.82296385  | 4.1297394   | 4.3073402   | 4.2519325   | 4.2994225   | 4.49474965  | 4.07333805  |
| "LOC100048499" | 9.23263     | 9.429677    | 8.72716     | 9.012511    | 9.324463    | 9.496376    | 8.965594    | 9.187313    |
| "LOC100048662" | 10.82024333 | 2.9287329   | 5.5999605   | 2.7083112   | 5.771940333 | 5.295554133 | 6.219299467 | 4.188335167 |

|                |             |             |             |             |             |             |             |             |
|----------------|-------------|-------------|-------------|-------------|-------------|-------------|-------------|-------------|
| "LOC100048884" | 5.5148954   | 3.647178    | 3.8644855   | 3.4361725   | 4.0603604   | 3.2810385   | 3.4700391   | 4.9932003   |
| "LOC100135765" | 3.4325922   | 3.3032734   | 3.3733497   | 3.4245749   | 3.2840135   | 3.3289437   | 3.2863088   | 3.3715086   |
| "LOC100503235" | 10.727139   | 11.142088   | 11.6937475  | 11.844694   | 11.021619   | 10.48027    | 11.270126   | 11.580139   |
| "LOC100503296" | 10.529226   | 11.1957265  | 10.9743945  | 11.091886   | 10.552223   | 10.721619   | 10.7350305  | 11.0390265  |
| "LOC100504784" | 5.3289485   | 5.4564466   | 5.5112834   | 5.4671497   | 5.391824    | 5.3567142   | 5.3903227   | 5.501225    |
| "LOC100504863" | 10.262937   | 10.63755325 | 10.327609   | 10.2480155  | 10.1894355  | 10.3016355  | 10.1946325  | 10.315338   |
| "LOC100504922" | 6.9585608   | 7.51669865  | 7.11471485  | 7.2551716   | 6.710213    | 6.72024275  | 6.79235055  | 6.890973    |
| "LOC100504968" | 11.971519   | 12.122307   | 12.368641   | 12.467869   | 12.262704   | 11.962437   | 12.267597   | 12.3463     |
| "LOC100504988" | 10.68805838 | 10.759735   | 10.99745275 | 10.98533725 | 10.76713675 | 10.56897675 | 11.19679125 | 11.1036725  |
| "LOC100505002" | 2.5229384   | 2.6370603   | 2.5707006   | 2.70348395  | 2.57569395  | 2.5271058   | 2.5652499   | 2.6756355   |
| "LOC100505015" | 12.963305   | 13.019927   | 12.8475275  | 12.490145   | 12.848939   | 12.912986   | 13.197301   | 12.575364   |
| "LOC100505031" | 7.83143815  | 8.12619455  | 7.97128445  | 7.82514425  | 7.90685125  | 7.95024515  | 8.012404    | 7.7903709   |
| "LOC100505062" | 5.2679834   | 5.25740935  | 5.3612636   | 5.7449262   | 5.3663332   | 5.29073195  | 5.4877485   | 5.5385089   |
| "LOC100505149" | 5.804391    | 5.9074254   | 5.9836464   | 5.8389144   | 6.0576615   | 6.123178    | 5.7570043   | 5.8186975   |
| "LOC100505160" | 4.7948075   | 4.74765315  | 4.9278769   | 5.0404954   | 4.8675071   | 4.76164615  | 5.0210346   | 5.1934936   |
| "LOC100505293" | 8.684408    | 8.841414    | 8.552809    | 8.35045     | 8.637344    | 8.975198    | 8.233844    | 8.21677     |
| "LOC100653389" | 2.4882085   | 2.6919477   | 2.6142685   | 2.7607224   | 2.6278374   | 2.5753715   | 2.6280434   | 2.7164576   |
| "LOC100861640" | 2.710178    | 2.834978    | 2.7394578   | 2.83441     | 2.7339      | 2.7069952   | 2.7326348   | 2.796175    |
| "LOC100861650" | 3.328223    | 3.4642098   | 3.361228    | 3.4499788   | 3.3671284   | 3.287339    | 3.3517232   | 3.4519074   |
| "LOC100861749" | 3.1165849   | 2.94115295  | 3.07121515  | 3.16178325  | 3.096189    | 3.27658615  | 3.08116075  | 3.6780038   |
| "LOC100861758" | 5.6653805   | 6.233675    | 6.064715    | 6.1361985   | 6.036979    | 5.9795914   | 5.753037    | 6.311895    |
| "LOC100861853" | 10.579367   | 9.960299    | 10.269643   | 10.598443   | 10.302329   | 10.146731   | 10.159689   | 10.687409   |
| "LOC100861858" | 2.2163658   | 2.296955    | 2.2553816   | 2.3879857   | 2.247313    | 2.258626    | 2.2784262   | 2.4664516   |
| "LOC100862012" | 11.809028   | 11.8667772  | 11.5122484  | 11.7114498  | 11.7280406  | 12.0433887  | 11.6792348  | 11.7354182  |
| "LOC100862072" | 3.0592299   | 2.8272605   | 4.462593    | 3.0282648   | 2.8569033   | 2.7499344   | 2.8377843   | 3.0336535   |
| "LOC100862515" | 5.1890169   | 5.6366319   | 5.01371975  | 5.405081    | 4.9758949   | 4.76200795  | 4.4155247   | 5.0769738   |
| "LOC100862583" | 3.8421474   | 4.589203    | 4.541377    | 3.8459709   | 3.7859588   | 3.8349943   | 3.9517672   | 4.0210657   |
| "LOC100862584" | 2.3067145   | 3.0344157   | 2.3422356   | 2.4259968   | 2.4959414   | 2.6231205   | 2.3397803   | 2.4217005   |
| "LOC100862594" | 7.8256536   | 7.7598553   | 8.099       | 7.9949665   | 7.8225937   | 8.104958    | 8.07021     | 8.004056    |
| "LOC100862618" | 6.3995123   | 4.5400977   | 7.686678    | 6.942761    | 6.806816    | 5.9406157   | 7.612447    | 6.4655204   |
| "LOC171588"    | 2.4334228   | 2.510365    | 2.4525247   | 2.5800219   | 2.4714522   | 2.4294403   | 2.467379    | 2.5580368   |
| "LOC269472"    | 2.414769    | 2.6279435   | 2.4322507   | 2.5283663   | 2.3992286   | 2.4003386   | 2.4300659   | 2.465289    |
| "LOC541456"    | 3.1760366   | 3.2705505   | 3.2163827   | 3.3316162   | 3.21894     | 3.1756263   | 3.158131    | 3.334952    |
| "LOC624295"    | 2.9478981   | 3.9727893   | 4.2171507   | 3.0289574   | 2.956543    | 2.875122    | 2.975976    | 3.0312462   |
| "LOC632465"    | 10.0633015  | 10.2681905  | 10.6968685  | 10.751661   | 10.257217   | 9.791238    | 10.643967   | 10.714337   |
| "LOC634555"    | 6.0934362   | 6.749489    | 6.2518535   | 6.160671    | 6.702559    | 6.37372     | 6.116992    | 6.123542    |
| "LOC635087"    | 11.9928335  | 11.837632   | 12.4188305  | 12.772769   | 12.267785   | 11.7512345  | 12.270954   | 12.648018   |
| "LOC636306"    | 9.061969    | 9.336061    | 8.847807    | 8.8687902   | 8.9296398   | 9.0504655   | 9.14954025  | 9.0450755   |
| "LOC637202"    | 2.3982522   | 2.5023952   | 2.4413114   | 2.566481    | 2.439557    | 2.3976238   | 2.4380343   | 2.5342422   |
| "LOC637796"    | 8.9515462   | 9.378475667 | 9.330299233 | 9.791511333 | 9.292249333 | 9.1205905   | 9.429669167 | 9.57086667  |
| "LOC638399"    | 11.848878   | 11.950291   | 11.9230247  | 11.83168413 | 11.8582822  | 11.8304495  | 11.91958275 | 11.80197838 |
| "LOC639905"    | 3.6963602   | 4.1174977   | 3.2570863   | 3.402991867 | 3.7200731   | 3.8682146   | 3.193379767 | 3.6247135   |
| "LOC639910"    | 2.8969202   | 3.1355336   | 3.0009239   | 3.1941392   | 3.0137928   | 2.9543283   | 2.9964137   | 3.1314852   |
| "LOC641050"    | 2.4030006   | 2.4993489   | 2.451571    | 2.5614135   | 2.4612823   | 2.4074614   | 2.450323    | 2.5759745   |
| "LOC665506"    | 2.542740533 | 2.623010633 | 2.559291067 | 2.6666272   | 2.538813867 | 6.2784249   | 2.5991212   | 2.6301966   |
| "LOC673151"    | 6.241015    | 6.4397554   | 7.5224333   | 7.555879    | 6.883038    | 6.9401402   | 7.259264    | 7.6253443   |
| "LOC676708"    | 3.0230258   | 3.2706664   | 3.1003485   | 3.3090947   | 3.1124392   | 3.0054536   | 3.0970268   | 3.1905522   |
| "LOC677113"    | 10.25756727 | 10.3358731  | 10.169504   | 10.12660813 | 10.16816353 | 10.18363007 | 10.35396877 | 10.1886739  |
| "LOC677654"    | 10.599659   | 9.693944    | 9.897435    | 10.004928   | 10.501269   | 10.1440325  | 10.1985655  | 10.040063   |
| "Loh12crl1"    | 6.1187367   | 6.7821126   | 7.195299    | 7.259442    | 6.6509023   | 6.0546556   | 7.1435785   | 7.019735    |
| "Lonp1"        | 8.578591    | 8.890683    | 8.621495    | 8.70604     | 8.809787    | 8.770873    | 8.582233    | 8.799314    |
| "Lonp2"        | 5.795998    | 5.95281165  | 5.7737935   | 5.87018475  | 6.18081925  | 5.9294241   | 5.711139    | 5.8650754   |
| "Lor"          | 6.0249569   | 2.39124425  | 8.24771825  | 2.38867365  | 2.34231915  | 2.32345165  | 2.32325915  | 2.39687455  |
| "Lox"          | 8.40931125  | 8.26241     | 8.511289    | 5.5936168   | 8.43802225  | 9.188741    | 5.8055501   | 6.99212535  |
| "Loxl1"        | 6.725958    | 3.5815063   | 8.519272    | 7.174464    | 7.583466    | 6.288081    | 7.9278855   | 7.189119    |
| "Loxl3"        | 4.0136304   | 3.9981275   | 5.446996    | 4.9265366   | 4.4083405   | 3.7972565   | 4.376807    | 4.9765573   |
| "Lpar1"        | 5.045789733 | 4.9637244   | 6.187365233 | 5.575220733 | 5.314137333 | 4.8219808   | 5.278716667 | 5.725138067 |
| "Lpar3"        | 2.5283215   | 2.6538312   | 2.5865166   | 2.7091699   | 2.588838    | 2.531033    | 2.5780458   | 2.7002432   |
| "Lpcat1"       | 3.623872833 | 3.5502085   | 4.036546633 | 4.316157967 | 4.061430367 | 4.838571533 | 4.084142267 | 4.2302006   |
| "Lpcat3"       | 7.427582    | 7.3104444   | 7.1945786   | 6.8982253   | 7.958957    | 7.93642     | 7.8328867   | 7.186287    |
| "Lpgat1"       | 8.177709625 | 6.5183481   | 7.8318315   | 7.029565125 | 7.605964475 | 6.852087775 | 7.66722965  | 7.317287075 |
| "Lphn1"        | 3.68835415  | 3.842435    | 4.3045622   | 4.6223915   | 3.91907285  | 3.8762445   | 3.72267915  | 4.20226445  |
| "Lpin1"        | 13.031963   | 13.213559   | 11.58277    | 11.866318   | 12.876211   | 13.1660895  | 11.7481835  | 11.9491425  |
| "Lpin2"        | 7.635994333 | 4.868157    | 3.827518333 | 3.8665204   | 4.594093    | 5.295112567 | 4.1385245   | 3.734648633 |
| "Lpin3"        | 2.3066814   | 2.3227062   | 2.3150725   | 2.356955    | 2.3127227   | 2.4232767   | 2.311757    | 2.2905037   |
| "Lpl"          | 12.83118775 | 11.8522225  | 11.838205   | 11.95455125 | 12.9455645  | 13.232065   | 13.03076    | 12.566928   |
| "Lpp"          | 6.476894725 | 6.1487045   | 7.12712785  | 6.404776825 | 6.2283571   | 6.475319025 | 7.206594525 | 6.58320665  |
| "Lpxn"         | 2.1094685   | 1.9363394   | 2.1184547   | 1.926747    | 2.1363094   | 4.38553     | 2.3354008   | 2.1439161   |
| "Lrat"         | 2.3295856   | 2.453842    | 2.3582704   | 2.4674177   | 2.3591113   | 2.3227103   | 2.3566988   | 2.4500709   |
| "Lrba"         | 5.9739455   | 6.9490794   | 5.6329763   | 5.5440091   | 6.1960865   | 6.4340999   | 5.43981     | 5.8286293   |
| "Lrdd"         | 2.3779705   | 2.4622626   | 2.4464977   | 2.535228    | 2.4474483   | 2.398461    | 2.4448304   | 2.4855769   |
| "Lrg1"         | 10.602241   | 7.480996    | 8.277007    | 6.6579604   | 8.543168    | 8.508377    | 7.9192495   | 7.1957273   |
| "Lrig1"        | 8.849845    | 10.732181   | 9.3816025   | 9.4797475   | 9.7811115   | 10.4790235  | 8.756464    | 9.2520455   |
| "Lrmp"         | 2.685098    | 2.705282    | 2.721538    | 2.77766     | 2.726811    | 3.9915318   | 2.8110023   | 2.8040943   |
| "Lrp1"         | 8.183194    | 7.3696375   | 8.754758    | 8.147294    | 8.693092    | 9.11218     | 8.266738    | 8.2017565   |
| "Lrp10"        | 7.1100736   | 6.8290763   | 7.1921096   | 7.0141706   | 7.376511    | 7.3441043   | 7.0347934   | 6.8663545   |
| "Lrp2"         | 2.7207673   | 2.961098    | 2.8198547   | 2.99529     | 2.826968    | 2.7565715   | 2.821304    | 2.9524498   |
| "Lrp4"         | 3.3558035   | 3.171432    | 3.7937531   | 4.215148    | 3.2609217   | 3.2661428   | 3.688811    | 4.338771    |
| "Lrp6"         | 6.1236137   | 6.952967    | 7.1018475   | 7.15650315  | 6.7380897   | 6.9808327   | 6.58198965  | 7.0057395   |
| "Lrp8"         | 2.2554922   | 2.4937372   | 2.305926    | 2.3582861   | 2.309065    | 2.2773175   | 2.2971911   | 2.3598847   |
| "Lrpap1"       | 7.69021665  | 8.02225365  | 8.124644825 | 7.895442075 | 8.27305015  | 8.084777125 | 7.832453625 | 7.95295225  |

|            |             |             |             |             |             |             |             |             |
|------------|-------------|-------------|-------------|-------------|-------------|-------------|-------------|-------------|
| "Lrpprc"   | 8.182976    | 8.136882    | 8.258427    | 8.657168    | 8.356942    | 8.082236    | 8.047639    | 8.6128645   |
| "Lrr1"     | 2.77869475  | 2.88387975  | 2.8223814   | 2.9162173   | 2.8233498   | 2.7708177   | 2.8113867   | 2.9023352   |
| "Lrrc1"    | 2.8258986   | 3.1622834   | 2.994861    | 3.206611    | 2.993197    | 2.9055185   | 2.971393    | 3.1283774   |
| "Lrrc14"   | 4.5920844   | 4.5926366   | 4.795419    | 4.9469604   | 4.4031405   | 4.693744    | 4.921619    | 4.6500735   |
| "Lrrc16a"  | 3.2340865   | 3.3161018   | 2.775787    | 2.8061056   | 2.9719837   | 4.216444    | 2.9049444   | 2.6397161   |
| "Lrrc18"   | 2.598418    | 2.7068374   | 2.630876    | 2.7717974   | 2.6508312   | 2.5941997   | 2.6507258   | 2.7196331   |
| "Lrrc2"    | 10.025958   | 9.864874    | 9.1140375   | 9.816995    | 9.679384    | 9.735478    | 9.1633625   | 10.1348505  |
| "Lrrc20"   | 8.896082    | 9.819704    | 10.08618    | 10.46372    | 9.345113    | 9.72974     | 9.597312    | 10.325723   |
| "Lrrc33"   | 2.7391145   | 2.2210774   | 3.6750445   | 3.0989392   | 3.2027824   | 4.372219    | 3.7730346   | 3.0083764   |
| "Lrrc3b"   | 2.3456817   | 2.4872167   | 2.38699     | 2.4739645   | 2.3928838   | 2.3448029   | 2.379535    | 2.4689128   |
| "Lrrc4"    | 2.5897634   | 2.7208836   | 2.6444314   | 2.775551    | 2.650284    | 2.588246    | 2.637616    | 2.7413747   |
| "Lrrc40"   | 5.9234757   | 6.312312    | 6.31664     | 6.67221     | 6.456563    | 5.952903    | 6.4710054   | 6.600974    |
| "Lrrc41"   | 7.1029167   | 7.590536    | 7.0106707   | 6.744476    | 7.3131013   | 7.993399    | 6.99713     | 6.6265464   |
| "Lrrc42"   | 6.2747436   | 6.3162966   | 6.588085    | 7.1239552   | 5.955418    | 5.985668    | 6.656742    | 6.824174    |
| "Lrrc46"   | 2.7454894   | 2.8923357   | 2.7956393   | 2.9300747   | 2.7866108   | 2.7239714   | 2.791126    | 2.9332452   |
| "Lrrc48"   | 3.0214624   | 3.8704748   | 3.002425    | 3.2985873   | 2.8905942   | 2.8343415   | 3.0610116   | 3.0506146   |
| "Lrrc49"   | 2.5327945   | 2.6273527   | 2.560799    | 2.6934702   | 2.5753894   | 2.5320647   | 2.5637946   | 2.6676817   |
| "Lrrc51"   | 4.1965866   | 4.562935    | 3.4108639   | 3.673093    | 3.6086369   | 3.5644643   | 4.090025    | 3.615548    |
| "Lrrc57"   | 6.3507056   | 6.665805    | 6.643044    | 6.586361    | 6.654713    | 5.902305    | 6.695223    | 6.938574    |
| "Lrrc58"   | 11.708486   | 13.066318   | 9.750575    | 10.260064   | 11.970537   | 12.701495   | 10.09689    | 10.558324   |
| "Lrrc59"   | 6.7624603   | 6.71103375  | 6.63978985  | 6.30084     | 6.49150515  | 7.0665192   | 6.9467533   | 6.2510533   |
| "Lrrc6"    | 2.5942671   | 2.7816215   | 2.6107316   | 2.8197062   | 2.6351266   | 2.5735967   | 2.618246    | 2.7369483   |
| "Lrrc61"   | 4.9731803   | 5.0777755   | 5.039828    | 5.0792437   | 5.5275097   | 4.8912606   | 5.008283    | 5.081453    |
| "Lrrc8a"   | 8.57720125  | 8.5672648   | 7.0527135   | 7.6644207   | 8.006433    | 8.8168885   | 7.4636702   | 7.6328755   |
| "Lrrc8c"   | 5.3240767   | 4.826522    | 4.116845    | 3.6230397   | 4.1904325   | 4.787179    | 3.7039156   | 4.1458025   |
| "Lrrflip1" | 6.130410367 | 5.782683    | 6.714189433 | 6.7320831   | 5.5944541   | 5.873230467 | 6.5389837   | 6.551053267 |
| "Lrrflip2" | 9.421511    | 9.232072    | 9.347135    | 9.383329    | 9.430161    | 9.160036    | 9.738926    | 9.371927    |
| "Lrriq4"   | 2.2988338   | 2.3896794   | 2.3369133   | 2.430792    | 2.3414197   | 2.297161    | 2.3386903   | 2.428103    |
| "Lrrk1"    | 4.845526    | 4.305459    | 5.5995023   | 5.3742175   | 5.14643735  | 5.63880115  | 5.40993625  | 5.85721725  |
| "Lrrk2"    | 3.078733    | 3.0744617   | 3.307364    | 3.1162517   | 3.3758962   | 3.1464026   | 3.5686176   | 3.1802888   |
| "Lrrn1"    | 4.5726247   | 4.7037883   | 4.545864    | 5.224281    | 5.68524     | 4.366766    | 5.125212    | 5.9442563   |
| "Lrrtm1"   | 2.37401295  | 2.4883352   | 2.4186452   | 2.547219    | 2.42832515  | 2.37832     | 2.4181598   | 2.5187697   |
| "Lrrtm2"   | 2.5990489   | 2.7111595   | 2.6318426   | 2.7623155   | 2.641181    | 2.5867918   | 2.6333847   | 2.7605042   |
| "Lrwd1"    | 5.21838935  | 5.16680515  | 5.00131215  | 5.16495455  | 5.0586802   | 5.40077185  | 5.56268715  | 5.36285555  |
| "Lsg1"     | 5.6173673   | 6.599655    | 5.101479    | 5.482555    | 5.9599857   | 6.241472    | 5.434331    | 5.700997    |
| "Lsm1"     | 7.122379    | 7.2776275   | 7.4983597   | 7.604624    | 7.3137355   | 7.3160987   | 7.764257    | 7.215407    |
| "Lsm10"    | 6.436772    | 5.80585     | 6.383682    | 6.332225    | 6.240031    | 5.751103    | 7.3675876   | 6.317299    |
| "Lsm12"    | 6.019504    | 6.3111      | 6.466552    | 6.83869     | 5.9268394   | 6.105348    | 6.5993304   | 6.5137787   |
| "Lsm14a"   | 2.3755717   | 2.504391    | 2.4272604   | 2.5386837   | 2.4417667   | 2.392821    | 2.4274678   | 2.525567    |
| "Lsm14b"   | 7.7513185   | 8.146326    | 8.54051     | 8.751847    | 8.166573    | 7.9677906   | 8.269516    | 8.829502    |
| "Lsm2"     | 3.907317    | 3.9843094   | 3.9649549   | 4.09355     | 3.8137734   | 3.944756    | 6.211293    | 4.182095    |
| "Lsm3"     | 8.337948    | 8.206296    | 8.897917    | 8.841314    | 8.771381    | 8.303673    | 9.092691    | 8.825668    |
| "Lsm4"     | 9.941236    | 10.189753   | 9.976116    | 9.700324    | 9.777646    | 9.629617    | 9.762954    | 9.707239    |
| "Lsm7"     | 6.842144    | 7.17815     | 7.3143287   | 7.333359    | 7.078792    | 6.918415    | 7.0387125   | 7.203236    |
| "Lsmd1"    | 9.510906    | 9.265493    | 9.986063    | 9.827806    | 9.337736    | 9.069409    | 9.843647    | 9.9354925   |
| "Lsp1"     | 6.17538     | 6.607934    | 7.600854    | 7.3083434   | 6.009544    | 6.994064    | 6.537961    | 6.575891    |
| "Lsr"      | 5.656089    | 2.196566    | 2.116026    | 2.0568244   | 2.0919054   | 2.5634823   | 2.0470307   | 2.0479555   |
| "Lss"      | 5.020459967 | 3.609825233 | 3.542878533 | 3.707030133 | 3.501478567 | 3.497669933 | 3.434999033 | 3.733467867 |
| "Lst1"     | 3.236851    | 1.8144586   | 2.1611512   | 1.9694712   | 2.1589658   | 2.1920328   | 2.4719832   | 2.0517304   |
| "Lta4h"    | 5.3518825   | 5.17253365  | 5.32568155  | 5.27527545  | 5.408717    | 5.4237612   | 5.31546055  | 5.447402    |
| "Ltb"      | 3.5354903   | 3.638256    | 3.6414785   | 3.6860337   | 3.5927522   | 8.4762745   | 3.773368    | 3.6793797   |
| "Ltlbp1"   | 5.96942     | 6.0936637   | 6.43243     | 6.4532976   | 6.190439    | 6.439287    | 6.2176924   | 6.370375    |
| "Ltlbp2"   | 2.1344748   | 2.1949356   | 2.146861    | 2.2139254   | 2.182275    | 2.6841576   | 2.2830694   | 2.7239377   |
| "Ltlbp3"   | 7.63683225  | 7.4967116   | 8.2068917   | 7.92407615  | 7.99242785  | 7.092396    | 8.1892105   | 7.86437625  |
| "Ltlbp4"   | 5.237741    | 5.2019157   | 6.2166767   | 6.135118    | 5.348041    | 5.332874    | 5.1229553   | 5.6563234   |
| "Ltbr"     | 6.022792    | 5.4098945   | 5.4113784   | 5.312098    | 5.8887005   | 5.3690968   | 6.067608    | 5.158244    |
| "Ltc4s"    | 1.8226197   | 1.8332183   | 1.8491789   | 1.8725127   | 2.8177004   | 3.7247844   | 2.4629025   | 1.8727304   |
| "Ltf"      | 1.981188    | 1.9949515   | 1.9723511   | 2.0444658   | 1.97355     | 5.5916057   | 1.9754868   | 2.0422397   |
| "Ltk"      | 2.2581193   | 2.3239105   | 2.813155    | 2.3644156   | 2.2739398   | 2.272103    | 2.2904408   | 2.3398547   |
| "Ltn1"     | 5.5589398   | 5.92216195  | 5.58722045  | 5.7911668   | 5.609574    | 5.81112265  | 5.476337475 | 5.777088475 |
| "Ltv1"     | 8.897871    | 9.012009    | 8.635153    | 8.751326    | 8.540329    | 9.092289    | 8.568142    | 8.612884    |
| "Luc7l"    | 6.430534033 | 7.476149433 | 5.574071067 | 5.755668633 | 6.3830129   | 7.7962128   | 5.432552967 | 5.737832233 |
| "Luc7l2"   | 9.39389225  | 9.38283525  | 9.34801175  | 9.499557    | 9.41002375  | 9.37273225  | 9.233573875 | 9.72162975  |
| "Luc7l3"   | 9.588355    | 10.388017   | 10.0561015  | 9.99982225  | 9.9741535   | 10.262449   | 9.93617125  | 10.073197   |
| "Lum"      | 8.813721    | 6.207906    | 10.575464   | 9.39582     | 9.5570135   | 7.489076    | 10.09571    | 9.7839985   |
| "Luzp1"    | 5.94006395  | 6.20582935  | 6.24408005  | 6.5028095   | 6.08788345  | 6.15191675  | 6.108676    | 6.0909001   |
| "Lxn"      | 5.9898944   | 5.16139     | 7.298384    | 6.359153    | 6.2539496   | 6.630178    | 6.536978    | 6.4880743   |
| "Ly6a"     | 10.646931   | 9.72777     | 11.010472   | 10.678165   | 11.14576    | 11.203529   | 11.305119   | 10.917081   |
| "Ly6c1"    | 10.879455   | 10.55793    | 10.438741   | 10.588795   | 11.3471775  | 11.493306   | 10.972946   | 10.930402   |
| "Ly6d"     | 4.3662915   | 2.4200292   | 5.869662    | 2.4683943   | 2.39458     | 6.2194223   | 2.394661    | 2.4650297   |
| "Ly6f"     | 2.362814    | 2.4279187   | 2.3997946   | 2.5092306   | 2.4006605   | 2.3613772   | 2.3984532   | 2.4663699   |
| "Ly6i"     | 2.2846544   | 2.4626894   | 2.3335385   | 2.4226794   | 2.336266    | 2.3043048   | 2.328446    | 2.4117074   |
| "Ly75"     | 2.8074036   | 2.994411    | 2.87698     | 3.0588083   | 2.8921957   | 2.8356483   | 2.8781235   | 3.0135534   |
| "Ly86"     | 6.217688    | 3.2734923   | 5.6774583   | 3.6904736   | 5.1553874   | 7.0716925   | 6.6027894   | 3.9406238   |
| "Ly9"      | 2.440071    | 2.4648383   | 2.456611    | 2.5199614   | 2.4128222   | 2.4329207   | 2.449546    | 2.5100043   |
| "Ly96"     | 3.1858475   | 2.9620614   | 3.0139105   | 2.9945154   | 3.5699522   | 3.6863804   | 4.3196926   | 3.0348866   |
| "Lyar"     | 7.9405527   | 8.273325    | 8.318482    | 8.237962    | 8.077918    | 7.7581244   | 8.59724     | 8.185241    |
| "Lyl1"     | 1.7680407   | 2.6790671   | 3.438789    | 3.5338292   | 3.8596797   | 5.350005    | 3.5983167   | 3.4719162   |
| "Lynx1"    | 6.522072    | 5.4060993   | 7.17459     | 8.064876    | 7.212576    | 6.1197104   | 6.27708     | 7.832108    |
| "Lypd1"    | 2.5750978   | 2.6236782   | 2.5868134   | 2.6368585   | 2.5933793   | 2.561724    | 2.5906322   | 2.6375206   |
| "Lypd3"    | 2.3548872   | 2.393397    | 2.7466042   | 2.4433072   | 2.3658988   | 2.3361936   | 2.3603225   | 2.4413378   |

|            |             |             |             |             |             |             |             |             |
|------------|-------------|-------------|-------------|-------------|-------------|-------------|-------------|-------------|
| "Lypla1"   | 10.293499   | 10.464504   | 10.758109   | 11.137632   | 10.455206   | 10.063476   | 10.468113   | 11.034167   |
| "Lypla2"   | 6.97653     | 6.964096    | 6.9768844   | 6.9703646   | 6.966682    | 7.0252266   | 7.1245875   | 6.9980674   |
| "Lypal1"   | 4.3351464   | 4.1916456   | 4.4707837   | 4.2231593   | 4.8444257   | 4.7430315   | 4.925873    | 4.358971    |
| "Lyrml"    | 5.4014792   | 5.3907294   | 5.6292057   | 6.023502    | 4.976344    | 5.2065134   | 5.297718    | 5.584958    |
| "Lyrml2"   | 7.23560815  | 7.2351483   | 7.59583925  | 7.5345282   | 7.31318975  | 7.1556525   | 7.53999215  | 7.525173    |
| "Lyrml5"   | 6.472367    | 6.46400455  | 6.562629    | 6.94241225  | 6.5688969   | 6.326011    | 6.48882935  | 6.937608    |
| "Lysmd1"   | 4.119089    | 5.177597    | 5.1493773   | 5.3920965   | 4.96336     | 4.984909    | 4.6108856   | 5.142912    |
| "Lysmd2"   | 4.2921166   | 5.4598284   | 5.0458927   | 5.089341    | 5.158503    | 5.3093824   | 5.0217257   | 5.078536    |
| "Lysmd3"   | 6.981508    | 6.814779    | 6.6151567   | 6.924076    | 6.500333    | 6.7300954   | 6.8226833   | 6.9709954   |
| "Lyst"     | 4.48193285  | 3.80534595  | 4.3820002   | 4.03670785  | 4.3055052   | 4.775075    | 4.5140234   | 4.528157    |
| "Lyve1"    | 7.1292365   | 5.7068653   | 6.6370025   | 5.5035973   | 7.5368798   | 8.20487325  | 6.472358    | 5.753748    |
| "Lyz1"     | 9.293803333 | 7.6271949   | 8.988844867 | 8.2028738   | 9.301209033 | 9.474924933 | 9.340909    | 8.392803667 |
| "Lyz2"     | 11.764218   | 8.583202    | 10.89238    | 9.712413    | 11.25997    | 11.806597   | 11.627767   | 9.889884    |
| "Lyzl4"    | 2.2878127   | 2.3622155   | 2.6554022   | 2.380001    | 2.294597    | 2.2830043   | 2.3044095   | 2.370342    |
| "Lztlf1"   | 5.9717085   | 6.40339225  | 5.5963645   | 6.09126225  | 6.0955105   | 6.4502393   | 5.553577    | 6.0907587   |
| "Lztr1"    | 7.253541    | 7.4887735   | 6.8976662   | 6.951514    | 6.9653895   | 7.331854    | 6.9926684   | 6.9609725   |
| "Lzts2"    | 7.590586    | 7.592238    | 7.4955096   | 7.2825766   | 8.258745    | 7.712639    | 7.8557057   | 7.436206    |
| "M6pr"     | 7.3108785   | 7.2857244   | 7.008607    | 6.941471    | 7.2238135   | 7.37560535  | 7.404215    | 7.032267    |
| "Mab21l1"  | 2.4588602   | 2.5884378   | 2.5177137   | 2.97984375  | 2.514873    | 2.4657612   | 2.51147665  | 2.87752225  |
| "Macf1"    | 8.06462     | 7.4486495   | 7.994912    | 7.849281    | 7.973465    | 8.4692675   | 8.0620168   | 8.1492505   |
| "Macrodl1" | 10.646509   | 10.282369   | 11.0101185  | 10.78739    | 11.053388   | 10.076897   | 10.88307    | 10.534831   |
| "Macrodl2" | 5.78057475  | 5.96343415  | 6.52812875  | 6.37234985  | 6.026689    | 5.3365615   | 6.3686527   | 6.6657901   |
| "Mad2l1bp" | 7.6557574   | 8.121182    | 7.241546    | 7.7665505   | 7.71855     | 8.519812    | 7.4303446   | 7.8429666   |
| "Mad2l2"   | 5.8398685   | 5.867253    | 5.591041    | 6.216585    | 5.301737    | 5.896074    | 5.7874694   | 5.7571945   |
| "Madd"     | 2.6349463   | 2.6565163   | 2.7961655   | 2.706628    | 2.636727    | 2.6171856   | 2.6125064   | 2.6648068   |
| "Maea"     | 4.8353825   | 5.10907     | 5.40906085  | 5.108215    | 4.9670437   | 4.77212725  | 5.0686607   | 5.025687    |
| "Maf"      | 2.6139553   | 3.032687    | 3.028978    | 3.0806928   | 3.0254376   | 3.0107481   | 3.0269248   | 3.1021411   |
| "Maf1"     | 7.096180533 | 7.678890933 | 7.238820933 | 7.124281333 | 7.226338    | 7.293242533 | 7.194387933 | 7.197673433 |
| "Mafb"     | 5.85515045  | 5.7332524   | 5.31332965  | 6.1513572   | 5.8617462   | 5.5547328   | 5.3259172   | 5.73575575  |
| "Maff"     | 8.755807    | 9.014631    | 2.951536    | 3.2390194   | 6.9969606   | 9.319613    | 4.330843    | 3.9393954   |
| "Mafg"     | 8.4109005   | 8.5593137   | 7.4229985   | 7.608004    | 7.7776972   | 9.2196685   | 7.20437285  | 7.4047712   |
| "Mafk"     | 9.108676    | 9.171067    | 6.9977674   | 6.8700457   | 8.376265    | 8.819368    | 7.0065794   | 7.073063    |
| "Mag"      | 2.0641854   | 2.4228752   | 2.808409    | 2.4687998   | 2.4572442   | 2.3053946   | 2.8931007   | 2.356702    |
| "Magea1"   | 2.4805074   | 2.6294541   | 2.5605326   | 2.673671    | 2.564252    | 2.4771862   | 2.5593114   | 2.6975906   |
| "Magea4"   | 2.5024443   | 2.5856009   | 2.5384197   | 2.6465466   | 2.5397673   | 2.5015912   | 2.5370061   | 2.6340132   |
| "Mageb1"   | 2.341753    | 2.3690076   | 2.3262434   | 2.4140174   | 2.3301458   | 2.304231    | 2.3252563   | 2.4174283   |
| "Maged1"   | 7.2279005   | 5.948886    | 8.059349    | 7.12064     | 7.321286    | 6.7218943   | 8.427272    | 7.3426247   |
| "Maged2"   | 6.96668     | 6.2383094   | 6.7030644   | 6.426088    | 5.191617    | 5.3338237   | 7.174747    | 6.3370404   |
| "Mageh1"   | 5.3181915   | 5.0542006   | 6.63062     | 6.466361    | 5.907723    | 5.7290826   | 5.9154253   | 6.193025    |
| "Maged2"   | 2.6315465   | 2.8358455   | 2.7485454   | 2.896475    | 2.748194    | 2.7266986   | 2.7417102   | 2.81196     |
| "Magi1"    | 3.4434059   | 3.25410095  | 3.3873439   | 3.5383024   | 3.30164065  | 3.2349343   | 2.94891955  | 3.36027455  |
| "Magi2"    | 3.4204373   | 3.795556    | 3.705954    | 3.9320307   | 3.713979    | 3.6239884   | 4.1065116   | 3.7300947   |
| "Magi3"    | 2.484877    | 2.52934255  | 2.5020634   | 2.596534    | 2.5122451   | 2.46023985  | 2.50026715  | 2.560565    |
| "Magix"    | 3.6328895   | 3.7376618   | 3.8663757   | 3.9601603   | 3.6942677   | 3.652637    | 3.0809731   | 3.785983    |
| "Magoh"    | 9.338583    | 9.960707    | 9.291864    | 9.173557    | 9.490702    | 9.961044    | 9.285034    | 9.215761    |
| "Magohb"   | 6.7351565   | 7.453759    | 7.0108128   | 6.994957    | 6.4405746   | 6.938146    | 7.1270623   | 7.0082083   |
| "Magt1"    | 6.3370976   | 5.237513    | 6.8368416   | 6.646799    | 6.313059    | 6.339138    | 6.7903395   | 6.8433876   |
| "Mak16"    | 7.893013    | 8.456002    | 7.3325725   | 7.570398    | 7.960226    | 7.9761276   | 7.5497255   | 7.3929844   |
| "Mal"      | 5.9267315   | 4.70547575  | 5.9405322   | 4.7296215   | 6.91214375  | 4.52193905  | 6.4015222   | 5.5790037   |
| "Mal2"     | 2.9553814   | 3.1826484   | 3.0715578   | 3.238062    | 3.0810077   | 3.0197625   | 3.047321    | 3.1800022   |
| "Malat1"   | 9.98275754  | 10.270569   | 9.86017078  | 9.82024434  | 9.98053028  | 10.4457575  | 10.03471576 | 9.74530782  |
| "Maml1"    | 4.95053675  | 5.32713875  | 4.94195405  | 4.73927355  | 5.2272267   | 5.58112     | 4.88278345  | 4.8021722   |
| "Man1a"    | 8.84322825  | 5.9442148   | 7.3976171   | 6.43118955  | 7.63707165  | 8.404507    | 7.09699345  | 6.8517809   |
| "Man1a2"   | 4.0942663   | 4.5971045   | 3.58313715  | 3.41454625  | 4.214615    | 4.49362425  | 3.56904675  | 3.5245932   |
| "Man1b1"   | 2.6880326   | 2.7438965   | 2.7937093   | 2.7875981   | 2.7867446   | 2.797484    | 2.9101882   | 2.8601513   |
| "Man2a1"   | 9.0043545   | 6.7492595   | 7.5765038   | 6.4959245   | 7.9443965   | 8.514572    | 7.5056677   | 6.934139    |
| "Man2b1"   | 5.4791345   | 5.1301516   | 5.1448041   | 4.69569975  | 5.61654815  | 6.2152171   | 5.34914985  | 4.9001645   |
| "Man2b2"   | 3.0609822   | 3.1688535   | 3.0653906   | 3.1592073   | 3.0652661   | 3.0871654   | 3.0817227   | 3.143103    |
| "Man2c1"   | 7.133392    | 7.34710185  | 6.80831235  | 6.73915385  | 7.62099     | 7.2291115   | 7.3546995   | 6.80780625  |
| "Manba"    | 5.0733747   | 4.3484316   | 5.577623    | 5.551657    | 5.128416    | 4.9617276   | 5.196207    | 5.343364    |
| "Manbai"   | 4.695367    | 5.185669    | 5.1752763   | 4.725858    | 4.80083     | 4.738671    | 4.7311454   | 4.7966475   |
| "Maneal"   | 2.3812642   | 2.428694    | 2.4077346   | 2.5229428   | 2.4126046   | 2.393412    | 2.402468    | 2.4765139   |
| "Manf"     | 9.43105     | 8.118943    | 9.189771    | 8.742301    | 9.112525    | 9.108792    | 9.496829    | 8.675646    |
| "Manscl1"  | 2.6643417   | 2.782418    | 2.783593    | 2.9150336   | 2.7597113   | 2.767397    | 2.7748377   | 2.927114    |
| "Maoa"     | 5.890925    | 5.6049595   | 6.356371    | 6.314852    | 6.2578287   | 5.877138    | 6.709779    | 6.100815    |
| "Map1lc3a" | 11.39479    | 10.984087   | 10.66417    | 10.69142    | 11.036573   | 10.596225   | 11.380476   | 10.294372   |
| "Map1lc3b" | 10.16836458 | 10.3836271  | 9.18811695  | 9.13122105  | 9.834738175 | 10.22110045 | 9.389676625 | 9.3552334   |
| "Map2k1"   | 8.986402    | 9.350505    | 9.5252905   | 9.787979    | 9.004903    | 9.452986    | 9.646363    | 9.426731    |
| "Map2k2"   | 8.017105    | 8.5820975   | 8.2147532   | 8.25136325  | 7.6085129   | 7.75449685  | 8.276921    | 7.9474535   |
| "Map2k3"   | 9.9551005   | 10.369721   | 9.53399975  | 9.6761005   | 10.2495365  | 9.973048    | 9.3525445   | 9.238032    |
| "Map2k4"   | 6.11005935  | 7.160761    | 7.0207205   | 7.42738     | 6.5344262   | 6.73976165  | 6.565457    | 7.17462865  |
| "Map2k5"   | 5.2599066   | 5.6487861   | 5.4841227   | 5.872614867 | 5.437166733 | 5.522791667 | 5.4668831   | 5.785046267 |
| "Map2k6"   | 3.6076465   | 4.4905868   | 5.507598    | 5.9963627   | 3.8020954   | 4.4335666   | 4.2666373   | 5.6410723   |
| "Map2k7"   | 6.390343325 | 7.15897485  | 6.51496845  | 6.8499324   | 6.4612829   | 6.757209925 | 6.205076525 | 6.73743275  |
| "Map3k1"   | 3.4865768   | 2.8954792   | 3.9096186   | 3.885694    | 3.9186869   | 4.9593983   | 4.4633408   | 4.016785    |
| "Map3k11"  | 5.3364806   | 5.4312887   | 4.873418    | 5.4001827   | 5.6982484   | 5.723148    | 5.381537    | 5.4416895   |
| "Map3k12"  | 3.6657768   | 3.841060667 | 4.132895933 | 4.180549833 | 3.925918633 | 3.845041267 | 3.934932867 | 4.276294    |
| "Map3k14"  | 3.224614    | 3.635145    | 3.393407    | 3.3615546   | 3.460897    | 4.603038    | 3.5872626   | 3.3514621   |
| "Map3k3"   | 5.690090833 | 6.315876967 | 5.3461534   | 5.687650733 | 5.7873038   | 5.843363367 | 5.878453567 | 5.5078444   |
| "Map3k4"   | 5.2133537   | 5.688272    | 6.21361835  | 6.57319535  | 5.63567365  | 5.0453637   | 6.34645795  | 6.29301405  |
| "Map3k5"   | 5.508866    | 3.3888328   | 4.4579153   | 4.111692    | 4.377693    | 5.429569    | 5.015391    | 4.471546    |

|            |             |             |             |             |             |             |             |             |
|------------|-------------|-------------|-------------|-------------|-------------|-------------|-------------|-------------|
| "Map3k6"   | 6.5101953   | 9.059046    | 4.3571215   | 3.9092512   | 6.974757    | 8.80754     | 4.9563756   | 4.467606    |
| "Map3k7"   | 5.2331513   | 5.4919254   | 5.41417502  | 5.56342486  | 5.25786246  | 5.13699872  | 5.4987231   | 5.61407612  |
| "Map3k8"   | 3.7532333   | 3.7616901   | 3.04995     | 2.4589164   | 4.0342975   | 4.1037726   | 3.3184538   | 3.1452205   |
| "Map4k1"   | 2.5914853   | 2.6180673   | 2.6124272   | 2.6789653   | 2.606605    | 4.00871     | 2.607479    | 2.659264    |
| "Map4k2"   | 2.3949306   | 2.4771707   | 2.4536836   | 2.5168568   | 2.4348165   | 3.07044635  | 2.5530275   | 2.5080143   |
| "Map4k3"   | 8.751897    | 8.749372    | 9.2322      | 8.688604    | 9.126276    | 8.951405    | 9.213071    | 8.886709    |
| "Map4k4"   | 3.995201575 | 3.875874125 | 4.0036281   | 3.81749835  | 4.45719165  | 5.122290125 | 3.993037275 | 3.995708    |
| "Map4k5"   | 5.361665933 | 5.827283667 | 5.085948733 | 5.886204233 | 5.637670667 | 5.226532    | 5.040484333 | 5.710878    |
| "Mapk1"    | 7.85002915  | 8.09599875  | 7.74077835  | 7.8665425   | 7.8426849   | 7.9543215   | 7.7845229   | 7.7916985   |
| "Mapk10"   | 2.7958052   | 3.1056342   | 2.8789415   | 3.117978    | 2.9000416   | 2.8324971   | 2.865835    | 3.023381    |
| "Mapk12"   | 10.041801   | 10.089754   | 10.555666   | 10.509119   | 10.216036   | 9.436789    | 10.443096   | 10.324644   |
| "Mapk13"   | 2.4322848   | 2.5595417   | 2.477623    | 2.5353045   | 2.4898152   | 2.4334612   | 2.4436662   | 2.5310054   |
| "Mapk14"   | 5.4385586   | 5.459429433 | 5.600968133 | 5.954887733 | 5.444133533 | 5.437354133 | 5.516783033 | 5.904209767 |
| "Mapk3"    | 5.710175    | 5.093996    | 6.0163846   | 5.898382    | 6.4021153   | 6.187155    | 6.4546986   | 5.967055    |
| "Mapk6"    | 6.301846    | 6.2174406   | 6.1641707   | 6.4641914   | 5.962494    | 6.343417    | 5.8835607   | 5.62018     |
| "Mapk8"    | 4.6376713   | 4.603426933 | 4.8414591   | 4.938747733 | 4.715106367 | 4.984377133 | 4.670129567 | 4.854225567 |
| "Mapk8ip1" | 2.4161458   | 2.4524233   | 2.4438472   | 2.4968376   | 2.4308825   | 2.4106486   | 2.4413247   | 2.5220442   |
| "Mapk8ip2" | 2.7720203   | 3.07096125  | 2.9168533   | 3.05604125  | 2.89235795  | 2.86977075  | 2.8668175   | 2.9774229   |
| "Mapk8ip3" | 3.4138913   | 3.6706476   | 2.9759037   | 3.3243728   | 3.7337213   | 3.7585385   | 3.556122    | 3.3806922   |
| "Mapk9"    | 5.807297667 | 6.1445524   | 6.4324601   | 6.6160702   | 6.183171433 | 6.261813233 | 6.4982593   | 6.626317833 |
| "Mapkap1"  | 6.0357565   | 5.962481    | 6.2635896   | 6.135275    | 5.4973878   | 5.633148    | 6.147454    | 6.06112     |
| "Mapkapk2" | 8.800277    | 8.587736    | 8.667585    | 9.165852    | 8.50996     | 8.137427    | 8.759365    | 9.093929    |
| "Mapkapk5" | 9.962582    | 10.232228   | 10.330573   | 10.475138   | 9.957347    | 9.7684765   | 10.418543   | 10.474419   |
| "Mapkbp1"  | 4.7405275   | 5.2290587   | 5.29928685  | 5.29573785  | 5.74743875  | 5.961074    | 5.08684255  | 5.3936245   |
| "Mapre1"   | 6.119017675 | 6.078075675 | 6.63151325  | 6.508537375 | 6.1775674   | 6.2445821   | 6.471206725 | 6.416768525 |
| "Mapre2"   | 6.632009375 | 6.2855085   | 7.01850195  | 7.16859295  | 6.6184306   | 6.566557575 | 6.81913295  | 7.071381075 |
| "Mapre3"   | 3.8510025   | 4.6464972   | 3.8878038   | 4.0336075   | 3.4173098   | 4.1624618   | 3.8270242   | 3.8648047   |
| "Mapt"     | 5.277808567 | 5.3348808   | 5.604762133 | 5.786974167 | 5.240977833 | 4.614861567 | 5.927045933 | 5.8638579   |
| "Marcks"   | 7.71163142  | 6.69594054  | 9.343963    | 8.7626044   | 7.8418531   | 7.79390752  | 8.4523616   | 8.8646014   |
| "Marcks11" | 3.848684    | 3.5334849   | 3.785274733 | 3.546020833 | 3.441324733 | 4.185337333 | 3.6894861   | 3.626688333 |
| "Marco"    | 8.67494     | 2.227633    | 2.196608    | 2.2809787   | 2.2035332   | 5.712095    | 2.2067323   | 2.2727218   |
| "Mark1"    | 2.48994796  | 2.67293354  | 2.55005102  | 2.64486344  | 2.59414364  | 2.52106894  | 2.51732402  | 2.67910072  |
| "Mark2"    | 4.4053615   | 4.8708826   | 4.99171635  | 5.03153845  | 4.7932488   | 4.753373    | 4.76077035  | 4.80521405  |
| "Mark3"    | 8.802744    | 9.321297    | 8.7219515   | 8.835346    | 8.900319    | 9.167531    | 8.717793    | 8.742795    |
| "Mark4"    | 3.0516073   | 3.2301031   | 3.0661956   | 3.14013175  | 3.0852625   | 3.0174595   | 3.08254335  | 3.17786225  |
| "Marveld1" | 4.396315633 | 4.6725804   | 4.834223867 | 4.6142137   | 4.7593311   | 4.955713867 | 4.6913956   | 4.605811667 |
| "Marveld2" | 2.837466    | 2.7515745   | 2.7406282   | 2.7609863   | 2.7541838   | 2.7241037   | 2.7402353   | 2.7500505   |
| "Mas1"     | 3.2599301   | 3.6313953   | 3.3609328   | 3.5445445   | 3.3761802   | 3.2882986   | 3.3569462   | 3.4986708   |
| "Masp1"    | 4.23798522  | 2.4433749   | 2.513993    | 2.5675634   | 2.4909294   | 2.29788518  | 2.54802716  | 2.5310135   |
| "Masp2"    | 3.4722585   | 2.1987132   | 2.16832055  | 2.24078085  | 2.17141865  | 2.13394085  | 2.16333165  | 2.24339675  |
| "Mast1"    | 2.4167736   | 2.50192     | 2.482769    | 2.8543525   | 2.482905    | 2.4616349   | 2.4839368   | 2.5629184   |
| "Mast2"    | 8.710346    | 9.369767    | 7.690816    | 8.126079    | 8.761049    | 9.011374    | 8.229622    | 8.093512    |
| "Mast3"    | 4.8493857   | 4.4191995   | 3.5069408   | 2.9269733   | 4.048734    | 5.7141514   | 4.2844825   | 3.128384    |
| "Mastl"    | 2.8442963   | 2.9662957   | 2.89106955  | 3.0403279   | 2.90070545  | 2.83844545  | 2.88442235  | 2.97659925  |
| "Mat1a"    | 12.536324   | 2.633385    | 4.0600047   | 2.6968865   | 3.3295345   | 2.5924284   | 2.583956    | 2.704946    |
| "Mat2a"    | 7.766512443 | 8.4240492   | 9.283627186 | 9.883319371 | 8.224348529 | 7.880697471 | 9.106988929 | 9.345712929 |
| "Mat2b"    | 9.323926    | 10.228677   | 9.397919    | 9.867711    | 10.002681   | 9.603605    | 9.1575      | 9.788899    |
| "Matk"     | 2.8076928   | 2.8566484   | 2.7926447   | 2.9123023   | 2.8131597   | 2.8047068   | 2.819359    | 2.8702624   |
| "Matn1"    | 2.477087    | 2.6520712   | 2.5415235   | 2.6726995   | 2.54497     | 2.504934    | 2.5384777   | 2.6322396   |
| "Matn2"    | 5.01463465  | 4.0941657   | 6.09886185  | 5.36984885  | 4.992832    | 4.45952775  | 5.1124692   | 5.6217558   |
| "Matn3"    | 2.6679695   | 2.752352    | 3.8676229   | 2.8572433   | 2.7098713   | 2.6671684   | 2.7170641   | 3.0934904   |
| "Matn4"    | 2.0818367   | 2.123405    | 2.6076844   | 2.5122383   | 2.107267    | 2.0722244   | 2.1062067   | 2.1865902   |
| "Matr3"    | 10.22900333 | 10.57386633 | 9.985502667 | 10.040769   | 10.48143183 | 10.33133267 | 10.05474633 | 10.20023033 |
| "Mau2"     | 5.378431425 | 5.93340135  | 5.227592125 | 5.47386795  | 5.610173225 | 5.740303325 | 5.4592826   | 5.436148575 |
| "Mavs"     | 9.20926     | 8.67448435  | 8.326614    | 9.18250575  | 9.137488    | 8.4348752   | 8.60433485  | 9.172916    |
| "Max"      | 6.157657    | 7.1796722   | 5.8668694   | 5.1786856   | 6.1653185   | 6.734259    | 5.723419    | 5.7773094   |
| "Maz"      | 2.6679497   | 2.5904603   | 2.6693373   | 2.7402084   | 2.670248    | 2.4994955   | 2.6658843   | 2.7334192   |
| "Mb"       | 14.835166   | 13.996715   | 14.663021   | 14.941795   | 14.916949   | 14.60399    | 14.444766   | 15.010596   |
| "Mbd1"     | 5.189183975 | 5.313862075 | 4.72137325  | 4.777512675 | 5.0003134   | 5.230506625 | 4.831853975 | 4.926178325 |
| "Mbd2"     | 7.567518    | 7.72543775  | 7.9256885   | 8.087224    | 7.6401235   | 7.629696    | 7.8549883   | 7.934241    |
| "Mbd3"     | 8.478831    | 8.935983    | 8.989795    | 9.147685    | 8.555464    | 8.174633    | 8.981857    | 8.843415    |
| "Mbd3l1"   | 2.4378133   | 2.5467029   | 2.485773    | 2.6080043   | 2.4878268   | 2.4454017   | 2.482405    | 2.5677893   |
| "Mbd3l2"   | 2.8759186   | 3.010215    | 2.914861    | 3.024597    | 2.8918943   | 2.9023466   | 2.8920667   | 2.9988837   |
| "Mbd6"     | 3.446317    | 3.8606904   | 3.1953268   | 4.0716634   | 3.842585    | 3.1908534   | 3.9331448   | 3.2463806   |
| "Mbp"      | 6.425456    | 6.6112337   | 6.1533294   | 6.5762377   | 6.6792808   | 5.770083    | 6.2636943   | 6.5545      |
| "Mbl1"     | 6.830714    | 1.7565446   | 1.7435461   | 1.7998518   | 1.7456527   | 1.7233518   | 1.7400208   | 1.8013257   |
| "Mbl2"     | 10.345877   | 2.0898902   | 2.074455    | 2.1335802   | 2.407118    | 2.003194    | 2.0280585   | 2.134853    |
| "Mbnl1"    | 12.969046   | 13.323884   | 13.660095   | 13.471886   | 13.445534   | 13.1831455  | 13.383187   | 13.718038   |
| "Mbnl3"    | 2.4063287   | 2.47943     | 2.4380422   | 2.5321298   | 2.4651532   | 2.4088085   | 2.4301558   | 2.527653    |
| "Mboat2"   | 5.300611    | 5.545054    | 5.8190026   | 5.26607     | 5.3512464   | 4.6716094   | 5.3592095   | 5.154489    |
| "Mboat7"   | 6.6148643   | 5.6290536   | 6.448777    | 6.18853     | 6.6526585   | 6.5425773   | 6.6747985   | 6.4906783   |
| "Mbp"      | 7.873440386 | 7.683526457 | 8.068538986 | 7.215947671 | 8.7161628   | 7.285737271 | 8.191305229 | 7.920905614 |
| "Mbtd1"    | 5.9498978   | 6.38422485  | 6.0783428   | 6.0867455   | 6.51298265  | 6.64519885  | 5.6327737   | 5.9686019   |
| "Mbtps1"   | 5.14445085  | 5.3731737   | 5.0947417   | 5.157985    | 5.0902921   | 5.1788666   | 5.0219412   | 5.1485574   |
| "Mc1r"     | 2.3810246   | 2.402771    | 2.3902647   | 2.4895575   | 2.382611    | 2.372775    | 2.3724077   | 2.4468205   |
| "Mc2r"     | 2.0637236   | 2.027836    | 2.2464983   | 2.0759013   | 3.1636958   | 3.8063369   | 2.638973    | 2.0792608   |
| "Mc5r"     | 2.2312245   | 4.510406    | 2.2561274   | 2.2755532   | 2.2689056   | 2.3802962   | 2.2521775   | 2.234817    |
| "Mcam"     | 5.157148    | 4.977237    | 5.8345323   | 5.157163    | 6.020825    | 5.2440333   | 5.3467155   | 5.2150664   |
| "Mcart1"   | 8.248876333 | 7.833113567 | 7.5391484   | 7.476162833 | 7.9210649   | 8.60848     | 8.010598    | 7.5297901   |
| "Mcart6"   | 2.6002898   | 2.6741881   | 2.6698923   | 2.7148952   | 2.667344    | 3.047626    | 2.6428454   | 2.7501802   |
| "Mcat"     | 6.671401    | 6.717959    | 6.4640527   | 6.3235345   | 6.4617796   | 6.2191896   | 6.6323085   | 6.2230806   |

|               |             |             |             |             |             |             |             |             |
|---------------|-------------|-------------|-------------|-------------|-------------|-------------|-------------|-------------|
| "Mccc1"       | 8.211145    | 8.05223     | 8.7042675   | 8.415094    | 8.7964945   | 8.362027    | 8.834943    | 8.599356    |
| "Mccc2"       | 2.5015066   | 2.5735478   | 2.5753684   | 2.622545    | 2.8617797   | 2.5093296   | 2.446076    | 3.2028306   |
| "Mcee"        | 9.525599    | 9.192239    | 9.533848    | 9.735563    | 9.507553    | 9.072683    | 9.7292795   | 9.678153    |
| "Mcf2"        | 2.6329598   | 2.8001902   | 2.6970787   | 2.8621233   | 2.711341    | 2.6849391   | 2.7041032   | 2.8361938   |
| "Mcf2"        | 9.4191065   | 8.161532    | 8.710546    | 8.574834    | 8.741781    | 8.482533    | 8.792269    | 8.669881    |
| "Mcgl1038069" | 6.3798685   | 5.99956     | 7.1547437   | 7.18386     | 6.1860166   | 6.544161    | 6.755809    | 6.612837    |
| "Mcl1"        | 11.15327033 | 11.14084117 | 10.454294   | 10.7576495  | 11.1405205  | 11.0491925  | 11.175283   | 10.95725683 |
| "Mcm10"       | 5.008866    | 2.2238925   | 2.141663    | 2.2538686   | 2.1805844   | 2.147233    | 2.1622941   | 2.2175388   |
| "Mcm2"        | 2.67833325  | 3.4611842   | 3.38310015  | 3.4430094   | 3.13342025  | 3.3324057   | 3.2643315   | 3.5459721   |
| "Mcm3"        | 3.27521145  | 3.781576625 | 3.372745575 | 3.56521345  | 3.411152425 | 3.651057875 | 3.383839825 | 3.437521125 |
| "Mcm3ap"      | 7.3940964   | 7.5975723   | 7.473686    | 7.618167    | 7.548399    | 6.9487987   | 7.29329     | 7.7038417   |
| "Mcm4"        | 4.52011025  | 4.57433105  | 5.1466589   | 5.2958498   | 5.1753423   | 5.3368955   | 5.010808    | 5.72916235  |
| "Mcm6"        | 5.30931735  | 4.56883675  | 4.9177563   | 4.8672265   | 5.050285    | 5.63603     | 5.1765685   | 5.1520855   |
| "Mcm7"        | 6.31292025  | 7.3658943   | 5.442054575 | 5.16981995  | 6.782198025 | 7.4246492   | 5.68451865  | 5.66058245  |
| "Mcm9"        | 2.5770068   | 2.6504018   | 2.6125522   | 2.7083168   | 2.6149287   | 2.5807383   | 2.608195    | 2.6969512   |
| "Mcmbp"       | 6.633007    | 6.6751776   | 6.679587    | 6.6620646   | 6.9016385   | 6.945901    | 6.631515    | 6.6821218   |
| "Mcoln1"      | 7.203883    | 7.712565    | 7.213116    | 7.212274    | 7.212033    | 7.197067    | 7.2112155   | 7.0695424   |
| "Mcoln2"      | 2.4033186   | 2.4668086   | 2.4354756   | 2.5369046   | 2.4122174   | 2.6107721   | 2.4284728   | 2.5127625   |
| "Mcoln3"      | 2.567166    | 2.695589    | 2.6227467   | 2.7742486   | 2.6535811   | 2.701672    | 2.623387    | 2.7342286   |
| "Mcpt2"       | 2.3372884   | 2.4147775   | 2.3473966   | 2.4313145   | 2.3514698   | 2.3216689   | 2.3473628   | 2.4261472   |
| "Mcpt4"       | 2.4697223   | 2.320537    | 3.2765574   | 2.5697188   | 2.6278274   | 2.5716639   | 2.5012302   | 2.5557122   |
| "Mcrrs1"      | 6.9391418   | 7.892277    | 7.4562936   | 7.3871107   | 7.6807795   | 7.2910547   | 7.105511    | 7.5620904   |
| "Mcts1"       | 10.343699   | 10.482938   | 10.55412    | 10.9593525  | 10.369532   | 10.492951   | 10.532762   | 10.798804   |
| "Mcts2"       | 7.980959    | 8.590938    | 8.07656     | 8.3383      | 8.130331    | 8.186571    | 8.391143    | 7.901079    |
| "Mdfi"        | 2.4387684   | 2.5380876   | 2.4770942   | 2.6008072   | 2.4786525   | 2.4578254   | 2.4700873   | 2.594494    |
| "Mdfic"       | 6.7755837   | 6.472027    | 7.1800113   | 6.8452797   | 7.123101    | 7.014991    | 7.2933455   | 7.089649    |
| "Mdh1"        | 13.00041333 | 12.45662667 | 12.911996   | 13.217162   | 13.26568533 | 12.7939055  | 12.90682167 | 13.27783467 |
| "Mdh2"        | 13.4754905  | 13.4762     | 13.844646   | 13.97016975 | 13.792259   | 13.59120375 | 13.55923325 | 13.927526   |
| "Mdk"         | 3.0812707   | 3.3890417   | 3.2461114   | 3.6444898   | 3.4509037   | 3.33031     | 3.3783286   | 3.4312863   |
| "Mdm1"        | 2.5723333   | 2.7607238   | 2.598988    | 2.6629472   | 2.6764815   | 2.541368    | 2.5911484   | 2.655024    |
| "Mdm2"        | 7.6968385   | 7.4617085   | 6.92466525  | 6.8742805   | 7.0039394   | 7.40658325  | 7.242537    | 6.8738565   |
| "Mdm4"        | 5.475776    | 6.721722    | 5.7168145   | 5.9906652   | 5.8453765   | 6.11385035  | 6.40051735  | 6.1432098   |
| "Mdn1"        | 5.7154775   | 6.036509    | 5.962106    | 5.9959764   | 5.9100175   | 6.205045    | 5.655181    | 6.0198174   |
| "Mdp1"        | 7.05778165  | 6.82418515  | 7.6329425   | 7.43430625  | 6.886327    | 6.8173137   | 7.9305715   | 7.5282452   |
| "Me1"         | 9.1184215   | 10.0183375  | 10.419114   | 10.5420425  | 9.5535645   | 9.7798165   | 11.368981   | 10.4682615  |
| "Me2"         | 2.85106955  | 2.90197085  | 2.83143485  | 2.9307095   | 2.77250385  | 3.32497675  | 2.8526454   | 2.84793925  |
| "Mea1"        | 7.55025875  | 7.5497672   | 7.711468    | 7.761094    | 7.38491285  | 6.8097208   | 8.23752615  | 7.7182115   |
| "Mecom"       | 2.6267614   | 2.803229    | 2.689972    | 2.8451264   | 2.7033772   | 2.6349366   | 2.680557    | 2.8232298   |
| "Meccp2"      | 6.21631815  | 7.35029935  | 6.08074585  | 6.081241    | 6.71009015  | 7.2742605   | 6.3444895   | 5.95684015  |
| "Mecr"        | 6.240278    | 6.53813835  | 6.16892715  | 6.4990995   | 6.7308745   | 6.51469975  | 6.7354536   | 6.65313015  |
| "Med1"        | 4.82698222  | 5.21279192  | 4.8770858   | 5.0977627   | 4.8238568   | 5.09057026  | 4.91500718  | 5.0733585   |
| "Med10"       | 8.473751    | 8.830644    | 7.928703    | 8.195717    | 8.327892    | 8.492507    | 8.250555    | 8.139818    |
| "Med11"       | 5.871871    | 4.985527    | 5.781735    | 5.633665    | 5.894814    | 6.0540905   | 6.4433713   | 6.2571306   |
| "Med12"       | 5.7364554   | 6.197538    | 5.7964573   | 5.672025    | 5.9408464   | 6.08047     | 5.77306     | 5.7704296   |
| "Med12"       | 2.8089776   | 2.899946    | 2.9317431   | 3.0796576   | 2.889145    | 2.824407    | 2.8832493   | 3.1071322   |
| "Med14"       | 2.529812    | 2.5688543   | 2.402327    | 2.5647426   | 2.5364037   | 2.5207775   | 2.5192683   | 2.5857663   |
| "Med15"       | 7.412547    | 7.7319646   | 6.5019894   | 6.681768    | 7.3839216   | 8.002777    | 6.8176494   | 6.8373985   |
| "Med16"       | 6.779188    | 7.5433707   | 7.1750455   | 7.1642256   | 6.989796    | 7.1534677   | 6.6829906   | 7.1018353   |
| "Med17"       | 6.8311276   | 7.3338494   | 6.39174     | 6.5314665   | 7.0577283   | 7.1337676   | 6.6504784   | 6.594676    |
| "Med19"       | 4.24711765  | 4.41597465  | 4.90433215  | 5.1222725   | 4.38763285  | 4.3555825   | 4.7825029   | 4.8836462   |
| "Med20"       | 7.73609665  | 8.09849815  | 7.60605     | 7.560936    | 7.646052    | 8.3604591   | 7.4114965   | 7.6930547   |
| "Med21"       | 8.099843    | 8.499582    | 8.302376    | 8.4625845   | 8.16312     | 8.163439    | 8.538438    | 8.435287    |
| "Med22"       | 5.7505727   | 6.2996507   | 6.3876653   | 6.316389    | 6.3168445   | 6.2062125   | 5.962148    | 6.496864    |
| "Med23"       | 5.529813    | 5.4530983   | 5.787765    | 5.446145    | 5.619098    | 5.6339536   | 5.9291887   | 5.724647    |
| "Med24"       | 5.285729    | 5.7997494   | 5.38877     | 5.358018    | 5.285006    | 4.975797    | 5.283151    | 5.318377    |
| "Med25"       | 5.6833606   | 5.743811    | 5.7486563   | 5.820567    | 5.354729    | 5.4126897   | 5.6862974   | 5.7197714   |
| "Med26"       | 4.896415    | 5.483977    | 5.135347    | 5.001996    | 4.9930043   | 4.9398274   | 4.879082    | 4.3156343   |
| "Med27"       | 6.3772707   | 7.337038    | 5.994859    | 6.002791    | 6.2816386   | 7.026334    | 6.2388916   | 5.7329917   |
| "Med28"       | 6.0798368   | 6.28416035  | 6.50148745  | 6.85540315  | 6.2266879   | 6.051283    | 6.5843224   | 6.48520085  |
| "Med29"       | 7.152354    | 6.9868035   | 7.0692697   | 6.8639574   | 6.699794    | 6.488833    | 7.293274    | 6.929438    |
| "Med30"       | 7.362275    | 8.007994    | 8.024546    | 8.250193    | 7.647901    | 7.285829    | 8.156353    | 8.035335    |
| "Med31"       | 7.52061     | 8.370892    | 7.7791266   | 7.8287725   | 7.982691    | 8.108493    | 8.028239    | 7.6408615   |
| "Med4"        | 7.8820496   | 8.570885    | 7.8631516   | 7.934093    | 8.10132     | 8.241574    | 7.9422646   | 8.20076     |
| "Med6"        | 6.0638895   | 6.9599113   | 6.45532     | 6.637781    | 6.5913663   | 6.470506    | 6.3995543   | 6.5791397   |
| "Med7"        | 8.488289    | 8.45045     | 8.56661     | 8.778279    | 8.720155    | 8.326379    | 8.697375    | 8.601055    |
| "Med8"        | 9.124548    | 9.902887    | 9.341717    | 9.25374     | 9.341983    | 9.625874    | 9.287985    | 9.219913    |
| "Med9"        | 6.98068635  | 7.3758845   | 6.82937735  | 7.0319583   | 6.93678855  | 6.9873147   | 6.8009197   | 6.7046273   |
| "Mef2a"       | 8.16342824  | 8.790177    | 8.485624    | 8.78384644  | 8.37327992  | 8.5415038   | 8.49486188  | 8.6750038   |
| "Mef2c"       | 10.2941518  | 10.4043252  | 11.5993768  | 12.0385649  | 10.2931614  | 8.974721    | 11.2669538  | 11.860962   |
| "Mef2d"       | 5.9243543   | 6.72758505  | 6.17102075  | 6.3031139   | 6.42092315  | 6.1304871   | 6.0836421   | 5.92557185  |
| "Mefv"        | 2.315392    | 2.3914366   | 2.3355489   | 2.41433     | 2.331879    | 2.2762408   | 2.3351798   | 2.4045      |
| "Meg3"        | 8.811000375 | 6.90755935  | 8.982557825 | 7.55816125  | 8.236347    | 7.1372035   | 8.944591    | 7.68458475  |
| "Meig1"       | 2.4731107   | 2.6294265   | 2.5141983   | 2.6316493   | 2.537117    | 2.473084    | 2.503658    | 2.6181567   |
| "Meis1"       | 4.6315513   | 4.7803693   | 4.8422003   | 4.9335127   | 4.865672    | 4.7815204   | 5.4284906   | 4.985505    |
| "Meis2"       | 2.54245     | 2.5684977   | 2.510593    | 2.6241467   | 3.2874682   | 2.7743115   | 2.9994311   | 2.607897    |
| "Mela"        | 2.974204833 | 3.161484033 | 3.0115158   | 3.167890633 | 3.044029467 | 2.9527099   | 3.0181086   | 3.151541067 |
| "Melk"        | 2.4908953   | 2.5956297   | 2.5547168   | 2.6597888   | 2.5462801   | 2.5138922   | 2.54039     | 2.6441808   |
| "Memo1"       | 6.32329475  | 6.26492735  | 7.234393    | 7.4118435   | 6.63694965  | 6.46871     | 7.241958    | 7.4057443   |
| "Men1"        | 3.199173    | 3.511113    | 3.2541126   | 3.4034295   | 3.4885379   | 3.5855206   | 3.4517383   | 3.6266883   |
| "Meox1"       | 2.3414373   | 3.0783827   | 3.427509    | 3.125887    | 2.7797215   | 3.0195813   | 3.231745    | 3.3778577   |
| "Meox2"       | 5.998514    | 6.67318585  | 7.77026875  | 8.5053255   | 7.72396475  | 6.96596245  | 7.687596    | 8.64434475  |

|             |             |             |             |             |             |             |             |             |
|-------------|-------------|-------------|-------------|-------------|-------------|-------------|-------------|-------------|
| "Mepce"     | 4.598776833 | 5.399751433 | 4.921901833 | 4.996292533 | 5.004599933 | 5.1610203   | 5.047229133 | 4.9309625   |
| "Mepe"      | 2.7460544   | 2.931955    | 2.8300662   | 2.9088247   | 2.836976    | 2.759732    | 2.827307    | 2.901432    |
| "Mertk"     | 7.0350413   | 6.0603685   | 5.9828525   | 4.558434    | 6.3218503   | 7.2133303   | 5.961701    | 5.8358245   |
| "Mesdc1"    | 3.2485778   | 3.427949    | 3.446753    | 3.3418238   | 3.2711089   | 3.1574762   | 3.2742019   | 3.3428416   |
| "Mesdc2"    | 8.5562315   | 8.124733    | 8.70561     | 8.536524    | 8.526455    | 8.300621    | 8.750037    | 8.412241    |
| "Mesp1"     | 2.3722987   | 2.490606    | 2.402691    | 2.5455706   | 2.4081304   | 2.3636498   | 2.405505    | 2.4371347   |
| "Mest"      | 3.1942763   | 3.1977592   | 4.3089056   | 3.2512171   | 3.270459    | 3.0108786   | 3.8860152   | 3.2414386   |
| "Metap1"    | 8.134460533 | 8.7897605   | 8.555641    | 8.698590667 | 8.3067872   | 8.5872782   | 8.572285667 | 8.401031367 |
| "Metap1d"   | 5.33723195  | 5.70128755  | 5.5906241   | 5.7709467   | 5.48942805  | 5.3450849   | 5.43191915  | 5.73309935  |
| "Metap2"    | 8.0350575   | 8.645161667 | 8.343652667 | 8.758044167 | 8.3074294   | 8.394467833 | 8.247107533 | 8.444260333 |
| "Metrn"     | 6.041806    | 6.9807663   | 7.9365554   | 8.005453    | 7.193655    | 6.4796762   | 6.461758    | 7.8444123   |
| "Metrnl"    | 6.505404    | 4.118973    | 6.9899287   | 6.1684866   | 6.614062    | 5.4323673   | 6.915985    | 6.7370205   |
| "Mettl1"    | 4.1789293   | 5.1682754   | 4.224308    | 4.1800356   | 4.2403774   | 4.6153655   | 4.3708024   | 3.999829    |
| "Mettl11a"  | 5.7438318   | 6.48252985  | 6.0447095   | 5.939868    | 5.74676975  | 5.74535865  | 5.63473175  | 5.7315314   |
| "Mettl13"   | 2.9556727   | 3.2114272   | 3.086189    | 3.2168915   | 3.1049695   | 3.0265174   | 3.083501    | 3.2100954   |
| "Mettl17"   | 3.885522867 | 3.819666067 | 3.800740867 | 3.974243667 | 3.839358233 | 3.774996933 | 4.243570033 | 4.1718463   |
| "Mettl121a" | 6.1978282   | 6.169327133 | 6.2347763   | 6.2648357   | 6.465590933 | 5.4199134   | 6.3261288   | 6.0646833   |
| "Mettl22"   | 9.83172     | 10.063905   | 10.560913   | 10.527269   | 9.593317    | 9.211498    | 10.210189   | 10.412376   |
| "Mettl3"    | 7.6114707   | 7.712808    | 7.432376    | 7.247958    | 7.699651    | 7.8805265   | 7.4751472   | 7.5429635   |
| "Mettl5"    | 8.627151    | 8.590758    | 8.900315    | 8.884906    | 8.583718    | 8.2085705   | 8.945767    | 8.979071    |
| "Mettl6"    | 5.2632656   | 7.00820805  | 5.30432185  | 5.0214286   | 6.2228597   | 7.47248605  | 5.4550728   | 5.3933815   |
| "Mettl7a1"  | 10.68369067 | 9.202572    | 9.292464667 | 9.487774    | 11.02822933 | 11.18621233 | 9.950544333 | 9.846559667 |
| "Mettl7a2"  | 7.625701    | 6.4560146   | 6.4910955   | 6.60213     | 7.7711635   | 7.9727674   | 7.114914    | 7.0343676   |
| "Mettl7b"   | 7.417821    | 2.4686363   | 2.4189992   | 2.501036    | 2.4152818   | 2.3989754   | 2.4119358   | 2.5231292   |
| "Mettl8"    | 4.9298863   | 3.1126654   | 3.9487774   | 4.5886273   | 3.520918    | 3.843815    | 4.794131    | 4.1971674   |
| "Mettl9"    | 8.0852405   | 7.899462    | 8.51100215  | 8.5397165   | 8.25439615  | 7.93880485  | 8.5439893   | 8.6808795   |
| "Mfap1a"    | 8.489676    | 9.1276695   | 8.0912275   | 8.1424057   | 8.8308845   | 8.897152    | 8.4363445   | 8.4047055   |
| "Mfap2"     | 2.0557196   | 2.0633833   | 3.4071224   | 2.1401453   | 2.103629    | 2.0465755   | 2.1033196   | 2.1400497   |
| "Mfap3"     | 4.7364765   | 4.9524206   | 4.9084997   | 4.9290056   | 4.90795835  | 4.88254     | 4.91152045  | 5.0192095   |
| "Mfap4"     | 1.9304736   | 1.9491547   | 3.7152243   | 2.00539     | 1.9384878   | 1.9187858   | 1.9382199   | 2.2942944   |
| "Mfap5"     | 8.064896    | 6.0917764   | 8.57043035  | 7.17361075  | 8.3144495   | 7.8801823   | 7.7372475   | 7.7846983   |
| "Mfge8"     | 8.988008    | 9.220676    | 9.125243    | 8.869787    | 9.578088    | 9.822132    | 8.932911    | 8.936008    |
| "Mfhas1"    | 8.91646     | 7.9009633   | 7.198153    | 7.0412784   | 7.3860645   | 8.242244    | 7.259794    | 7.206518    |
| "Mfn1"      | 10.514065   | 10.60809    | 10.581094   | 10.9158435  | 10.8517965  | 10.6573905  | 10.5563475  | 11.181295   |
| "Mfn2"      | 11.356037   | 11.968573   | 11.864455   | 12.356955   | 11.810361   | 11.362405   | 11.679685   | 12.120606   |
| "Mfng"      | 3.3764744   | 3.4122617   | 3.3911922   | 2.7823994   | 4.862935    | 4.343913    | 4.5810204   | 3.4541738   |
| "Mfsd1"     | 5.886332    | 5.7657175   | 5.805034633 | 5.714647933 | 5.8826099   | 5.888561767 | 5.9302607   | 5.8603616   |
| "Mfsd10"    | 2.7127013   | 3.0735164   | 2.8941357   | 2.7654848   | 2.8090649   | 3.0778837   | 2.74111997  | 2.559578    |
| "Mfsd3"     | 6.0555778   | 5.663864    | 6.485756    | 6.952419    | 6.355563    | 5.1126704   | 6.286313    | 6.7780495   |
| "Mfsd4"     | 2.90313885  | 3.2415769   | 3.24486965  | 3.25488735  | 3.0333853   | 2.97948465  | 3.08171075  | 3.23317885  |
| "Mfsd5"     | 6.5187063   | 6.703055    | 6.8223743   | 6.68754     | 6.800148    | 6.692548    | 6.6964326   | 6.562461    |
| "Mfsd6"     | 5.458151433 | 5.255810433 | 5.691127367 | 5.853839633 | 5.805380167 | 5.7017939   | 5.467787933 | 5.992265167 |
| "Mfsd7b"    | 2.8307562   | 3.724402    | 2.9193046   | 3.058238    | 3.004549    | 3.0103798   | 2.582088    | 3.042818    |
| "Mfsd7c"    | 2.4901323   | 2.2297196   | 2.2138007   | 2.2674723   | 2.1937852   | 2.2436209   | 2.2110882   | 2.2623308   |
| "Mfsd8"     | 6.3574767   | 7.16481     | 7.291562    | 7.1768208   | 7.1813736   | 6.7274747   | 7.2588434   | 7.4878674   |
| "Mga"       | 4.8837054   | 5.42062505  | 4.8780489   | 4.97778075  | 5.1939801   | 4.9997182   | 4.9573975   | 5.08786685  |
| "Mgarp"     | 2.3646169   | 2.4360476   | 2.4037142   | 2.490637    | 2.4227242   | 2.3798091   | 2.594897    | 2.487522    |
| "Mgat1"     | 6.943117    | 6.946163    | 6.924283    | 7.2121634   | 6.9275937   | 6.855619    | 7.0024176   | 6.9798436   |
| "Mgat2"     | 5.780947    | 5.50115225  | 6.06721775  | 5.7705793   | 5.8134298   | 5.8958745   | 5.99405915  | 5.648802    |
| "Mgat4b"    | 7.5102787   | 7.5629754   | 7.765481    | 7.72184     | 8.174795    | 7.5112963   | 8.34343     | 7.823646    |
| "Mgat5"     | 2.9679623   | 3.1566095   | 3.0209627   | 3.124425    | 3.025041    | 2.9394228   | 3.0140042   | 3.110799    |
| "Mgea5"     | 7.7902693   | 7.94323874  | 5.8623012   | 6.02079904  | 7.01957444  | 7.7222562   | 6.46333838  | 6.26237806  |
| "Mgl2"      | 4.633865    | 3.3577425   | 7.480638    | 6.062246    | 6.608474    | 5.1575313   | 7.463258    | 6.6096187   |
| "Mgl1"      | 7.577411333 | 7.083977667 | 8.337279533 | 7.410105033 | 8.8919955   | 8.419729    | 8.595252667 | 7.992300333 |
| "Mgmt"      | 2.5507865   | 2.5414143   | 2.516913    | 2.5713031   | 2.500823    | 2.4460413   | 2.7412229   | 2.497143    |
| "Mgp"       | 11.503994   | 10.054568   | 10.954975   | 10.660288   | 10.772051   | 10.297183   | 10.2814     | 11.429822   |
| "Mgst1"     | 13.457938   | 10.89028    | 11.173549   | 10.856992   | 12.186557   | 12.798944   | 12.529552   | 11.206796   |
| "Mgst2"     | 3.675026    | 4.5288653   | 5.056073    | 3.7068572   | 5.699356    | 5.8207936   | 6.036768    | 4.833935    |
| "Mgst3"     | 7.5510252   | 7.77828285  | 7.62175315  | 8.2126393   | 7.8120358   | 7.5979685   | 7.7823728   | 7.7909395   |
| "Mia1"      | 5.9226785   | 5.633757    | 6.484284    | 5.3758144   | 5.832972    | 6.0880446   | 5.70647     | 5.579994    |
| "Mia3"      | 8.5048365   | 9.061191    | 8.7145327   | 8.90006875  | 8.67035295  | 9.088772    | 8.3713032   | 8.6470515   |
| "Mib1"      | 2.655102    | 2.925723    | 2.4434876   | 2.798585    | 2.6618998   | 2.646831    | 2.398755    | 2.785493    |
| "Mib2"      | 5.6575046   | 5.9784017   | 5.9224577   | 6.030206    | 5.870243    | 5.728473    | 6.0653725   | 6.284198    |
| "Mical1"    | 4.40227795  | 4.39210235  | 4.643852    | 4.56774405  | 4.36043885  | 5.06406095  | 4.416113    | 4.40969565  |
| "Mical2"    | 2.492959    | 2.5373635   | 2.5006287   | 2.5695512   | 2.5048935   | 2.4837618   | 2.50682     | 2.560025    |
| "Micu1"     | 7.2629194   | 7.2686577   | 7.449278    | 7.75624     | 7.3450584   | 6.786118    | 7.8515797   | 7.757021    |
| "Mid1ip1"   | 7.9169784   | 7.0020175   | 7.00676     | 8.058795    | 7.7013974   | 7.259912    | 8.669992    | 8.088015    |
| "Mid2"      | 2.3690946   | 2.4920616   | 2.4264314   | 2.4918356   | 2.4176733   | 2.3690028   | 2.399958    | 2.4912186   |
| "Midn"      | 7.602307    | 7.5515833   | 7.0398498   | 7.2691097   | 7.677951    | 8.193147    | 7.468294    | 7.1080627   |
| "Mier2"     | 3.7763314   | 4.437878767 | 4.256084067 | 4.2650373   | 4.1124683   | 4.096981633 | 4.046106833 | 4.1989366   |
| "Mif"       | 10.944731   | 10.572602   | 10.606425   | 10.542593   | 10.671435   | 10.464743   | 11.177634   | 10.749721   |
| "Mif4gd"    | 7.2157817   | 6.6975803   | 7.3450294   | 7.2879586   | 7.3719907   | 7.3251677   | 7.116561    | 7.4291296   |
| "Miip"      | 4.37340355  | 4.6408333   | 4.4495213   | 4.4642663   | 4.53662585  | 4.62347695  | 4.3809165   | 4.46907465  |
| "Mina"      | 5.206210133 | 5.043258867 | 5.4475912   | 5.767292367 | 5.650115433 | 5.048718433 | 5.704605867 | 5.8213279   |
| "Mink1"     | 4.784845    | 4.990184    | 4.9231462   | 5.0570292   | 5.1928854   | 4.829271    | 4.818696    | 5.0257215   |
| "Minos1"    | 11.6197615  | 11.516846   | 11.928425   | 12.1125925  | 11.778313   | 11.279668   | 11.7818905  | 11.89987575 |
| "Minpp1"    | 6.98381305  | 7.0174862   | 7.0885775   | 7.2228015   | 6.73104455  | 6.52391505  | 7.02546285  | 7.70533185  |
| "Mios"      | 6.6498895   | 7.46568735  | 6.47655675  | 6.7237656   | 6.9944945   | 7.04671685  | 6.58994515  | 6.67857095  |
| "Mip"       | 2.3226259   | 2.436076    | 2.3733337   | 2.4671519   | 2.3771327   | 2.363167    | 2.4383018   | 2.4586494   |
| "Mipol1"    | 2.8278103   | 2.954778    | 2.8498893   | 2.9837928   | 2.8664024   | 2.7893393   | 2.8594277   | 2.9564228   |
| "Mir682"    | 6.5485687   | 6.988595    | 6.8703036   | 6.983965    | 6.9249473   | 6.708821    | 7.121193    | 7.1398935   |

|           |             |             |             |             |             |             |             |             |
|-----------|-------------|-------------|-------------|-------------|-------------|-------------|-------------|-------------|
| "Mis12"   | 2.8813515   | 4.591398    | 4.311162    | 4.747617    | 4.176648    | 4.3575487   | 4.309041    | 4.6369896   |
| "Mitd1"   | 2.80265365  | 2.918663    | 3.0681436   | 3.0769384   | 3.08516525  | 3.17960085  | 3.29084445  | 3.2914871   |
| "Mitf"    | 5.3265542   | 5.71277725  | 5.24195685  | 5.48332385  | 5.5187647   | 5.805828    | 5.34853465  | 5.4622099   |
| "Mki67"   | 3.0986905   | 2.7233865   | 4.1336327   | 2.7672412   | 2.7048645   | 5.194133    | 2.8175159   | 2.9663892   |
| "Mki67ip" | 7.589085    | 8.498212    | 7.064307    | 7.306749    | 7.4557257   | 8.44768     | 7.3202934   | 7.124681    |
| "Mkks"    | 6.4294496   | 6.336522    | 6.771603    | 6.998477    | 6.37579725  | 6.0823052   | 6.69486885  | 7.0427685   |
| "Mkl1"    | 5.098954    | 4.014795    | 6.3021274   | 6.4840117   | 3.815245    | 4.8532934   | 6.2409062   | 5.5924616   |
| "Mkl1n1"  | 8.539511    | 8.95059     | 8.21172     | 8.551676    | 8.61907     | 8.785744    | 8.454751    | 8.346809    |
| "Mknk1"   | 4.5293315   | 4.55518215  | 4.71826625  | 4.6490209   | 4.87333945  | 4.60875145  | 4.9417224   | 4.6266795   |
| "Mknk2"   | 10.46621275 | 10.213399   | 8.5106215   | 8.921536    | 9.892805    | 10.034284   | 10.0329133  | 9.151369    |
| "Mkrn1"   | 6.16833524  | 6.3877688   | 5.43496428  | 5.51728542  | 6.3241458   | 6.86090746  | 5.8123761   | 5.9363205   |
| "Mkrn2"   | 8.481139    | 8.8780235   | 8.931598    | 9.1844115   | 8.77687225  | 8.48290235  | 8.9880095   | 9.0955845   |
| "Mkrn3"   | 2.4721289   | 2.5906734   | 2.5126693   | 2.6602392   | 2.5142193   | 2.4592063   | 2.5135822   | 2.6061869   |
| "Mlc1"    | 2.3688912   | 2.4867384   | 2.4102294   | 2.541375    | 2.4110153   | 2.365927    | 2.4080362   | 2.487073    |
| "Mlec"    | 6.2319365   | 6.49034     | 7.802861    | 7.172014    | 6.7806487   | 6.524901    | 7.265587    | 7.2087374   |
| "Mlf1"    | 10.851891   | 12.455468   | 12.304364   | 12.760271   | 12.740402   | 13.242211   | 11.781564   | 12.686878   |
| "Mlf2"    | 6.1359096   | 6.500304    | 6.805802    | 6.8925805   | 6.2854643   | 6.1729074   | 6.7824736   | 6.9576173   |
| "Mlh1"    | 4.502654    | 4.512307    | 5.02836     | 4.4938707   | 4.512307    | 4.320356    | 4.748753    | 4.4945807   |
| "Mlh3"    | 4.031033    | 5.1157694   | 4.846745    | 5.5638223   | 4.292595    | 3.5107327   | 4.609403    | 5.0811176   |
| "Mll1"    | 5.67370865  | 5.9491975   | 5.04395465  | 5.02532215  | 5.63863025  | 6.05078795  | 5.35957425  | 5.23663125  |
| "Mll2"    | 2.8705502   | 3.0765085   | 2.9830456   | 3.0236437   | 2.9814623   | 2.966947    | 2.9868479   | 3.0233326   |
| "Mll3"    | 7.7273293   | 8.333961    | 7.5608273   | 7.686871    | 7.811158    | 8.029322    | 7.5291123   | 7.420746    |
| "Mll5"    | 7.834083    | 8.06657     | 8.3673545   | 8.594295    | 8.822687    | 8.67431     | 8.494074    | 8.8776685   |
| "MlIt1"   | 4.4755354   | 4.887539    | 4.7049656   | 4.999009    | 4.530448    | 4.598135    | 5.331443    | 4.997964    |
| "MlIt10"  | 8.274632    | 9.440125    | 7.7797017   | 8.036668    | 9.082918    | 9.265007    | 7.9144845   | 8.104112    |
| "MlIt11"  | 5.80970315  | 6.2894597   | 6.3731978   | 6.3690184   | 5.91172235  | 6.5440565   | 6.2339124   | 6.2737446   |
| "MlIt3"   | 7.535801    | 8.161522    | 9.085131    | 9.494856    | 7.8625145   | 7.416531    | 8.60355     | 9.413109    |
| "MlIt6"   | 2.8865573   | 3.3277589   | 3.27140905  | 3.74530535  | 3.34414745  | 3.3521672   | 3.30307115  | 3.5832035   |
| "Mlph"    | 2.292194    | 2.3591459   | 2.3287375   | 2.4372854   | 2.333547    | 2.299231    | 2.3281727   | 2.406105    |
| "MlSt8"   | 3.29780295  | 3.3973794   | 3.31158845  | 3.45993075  | 3.31350185  | 3.4666963   | 3.3140898   | 3.4014143   |
| "Mlx"     | 5.3140725   | 5.1292946   | 5.10648465  | 5.0293988   | 5.3492095   | 5.7016685   | 5.80417325  | 5.22552225  |
| "Mlxip"   | 9.321964    | 10.116009   | 8.918684    | 8.659379    | 9.4895315   | 10.425128   | 9.09944     | 9.122547    |
| "Mlxipl"  | 8.603088    | 7.505862    | 9.510782    | 9.477377    | 8.813887    | 7.7310543   | 9.549811    | 9.332689    |
| "Mlycd"   | 8.959239    | 9.616718    | 8.067511    | 8.626493    | 9.545019    | 9.058127    | 8.47104     | 8.949933    |
| "Mmaa"    | 6.4391575   | 5.9219923   | 6.1276584   | 6.7825955   | 6.4524093   | 6.2080555   | 6.8990855   | 6.4564304   |
| "Mmab"    | 2.83335645  | 3.22250095  | 2.9889897   | 3.12190775  | 2.99173725  | 2.8830769   | 2.96633235  | 3.1035028   |
| "Mmachc"  | 8.007998    | 8.309854    | 8.758069    | 9.008104    | 8.5019655   | 8.02189     | 8.342429    | 8.904094    |
| "Mmadhc"  | 10.508595   | 11.040613   | 10.960607   | 11.0076885  | 10.878807   | 10.950477   | 10.789231   | 10.907159   |
| "Mmd"     | 8.38125675  | 8.15275935  | 8.9145535   | 7.33378965  | 9.4778665   | 8.259284    | 9.6346645   | 7.90892385  |
| "Mmd2"    | 6.5101443   | 3.83967865  | 4.7393551   | 3.684461    | 3.92092135  | 4.5718748   | 7.3032595   | 3.4849814   |
| "Mme"     | 2.348573    | 2.4162161   | 2.3768778   | 2.524802    | 2.395233    | 2.3861642   | 2.3755198   | 2.4738865   |
| "Mmgt2"   | 2.5185711   | 2.4173474   | 2.9799218   | 2.5843718   | 2.3708873   | 2.4936378   | 3.1057212   | 2.541711    |
| "Mmp11"   | 3.2427926   | 4.4841805   | 4.432552    | 4.349415    | 4.543455    | 5.8951025   | 4.513693    | 4.533378    |
| "Mmp12"   | 3.1195421   | 2.5851645   | 2.5160086   | 2.6345792   | 2.5229647   | 2.4743145   | 4.649642    | 2.6343875   |
| "Mmp13"   | 2.4900954   | 2.6282787   | 2.537029    | 2.6716993   | 2.543625    | 2.5033808   | 2.5396068   | 2.65406     |
| "Mmp14"   | 4.93564525  | 4.6823855   | 5.18256755  | 4.65124235  | 4.9936652   | 5.15253475  | 4.8430916   | 4.5276616   |
| "Mmp15"   | 2.8459535   | 2.5603602   | 3.0299718   | 3.4111323   | 2.8407328   | 2.4141574   | 3.0160306   | 3.181198    |
| "Mmp17"   | 2.317543    | 2.5787344   | 2.493052    | 2.571844    | 2.499722    | 2.4609356   | 2.4561782   | 2.578906    |
| "Mmp19"   | 2.67129025  | 2.7222519   | 2.70447005  | 2.7979145   | 2.71991785  | 2.66515255  | 2.70171205  | 2.775352    |
| "Mmp2"    | 7.89255275  | 6.93782535  | 9.59251     | 8.3897195   | 8.78385     | 8.0645963   | 8.1429162   | 8.456337    |
| "Mmp23"   | 3.3316591   | 3.6943893   | 5.570715    | 3.8701187   | 3.83558105  | 3.8155964   | 3.8123012   | 3.9249022   |
| "Mmp24"   | 2.72968185  | 2.89662955  | 3.02755565  | 3.0095891   | 2.88188695  | 2.81326745  | 2.82067125  | 2.89221595  |
| "Mmp3"    | 2.2837877   | 2.5706296   | 4.5441637   | 2.6575534   | 3.6957316   | 3.1610441   | 3.6243248   | 2.5821679   |
| "Mmp8"    | 2.8258083   | 2.2485652   | 2.1842034   | 2.2796412   | 2.2254772   | 3.181431    | 2.2210126   | 2.2794352   |
| "Mmp9"    | 3.3184502   | 3.2009032   | 3.5225317   | 3.3606896   | 3.7108831   | 4.009897    | 3.8694143   | 3.832093    |
| "Mms19"   | 4.3126969   | 4.341184    | 3.6799895   | 3.9217078   | 3.9681361   | 4.1973009   | 4.0055445   | 4.02906595  |
| "Mnat1"   | 7.2801137   | 7.833531    | 7.4948387   | 7.360401    | 7.596161    | 7.042106    | 7.666038    | 7.372344    |
| "Mndal"   | 8.0714755   | 6.7814437   | 7.94133085  | 7.889319    | 7.742254    | 9.027857    | 8.67725525  | 8.2412883   |
| "Mns1"    | 2.4946609   | 2.540674    | 2.4752378   | 2.671105    | 2.438771    | 2.4632087   | 2.483151    | 2.565517    |
| "Mnt"     | 5.37912735  | 5.3442781   | 4.999372    | 5.05908805  | 5.33633815  | 5.2226041   | 4.99931375  | 5.06933965  |
| "Mob1a"   | 6.79950425  | 6.53775015  | 7.11576665  | 6.74817135  | 7.2173185   | 7.936313    | 7.46878635  | 6.94480025  |
| "Mob1b"   | 7.812476    | 8.118966    | 8.695758    | 9.105212    | 8.325132    | 7.7993183   | 8.238506    | 8.9009905   |
| "Mob2"    | 7.383173    | 8.045276    | 7.173452    | 7.372513    | 7.626248    | 7.750338    | 7.006464    | 7.3936706   |
| "Mob4"    | 9.2692515   | 9.822923    | 9.3182605   | 9.52401025  | 9.445651    | 9.7171095   | 9.254956    | 9.4350985   |
| "Mobp"    | 2.83801     | 2.9978364   | 2.8882782   | 3.0639336   | 2.8976758   | 2.8405223   | 2.8891664   | 3.022008    |
| "Mocos"   | 6.313878    | 7.357989    | 4.5088625   | 4.8262434   | 6.3516207   | 7.625332    | 5.387621    | 4.795679    |
| "Mocs1"   | 2.7595606   | 3.9556649   | 2.520957    | 2.6778083   | 2.6199746   | 2.9789226   | 2.5205162   | 2.6752338   |
| "Mocs2"   | 6.06365625  | 5.96554805  | 6.23998395  | 6.2864401   | 6.0984868   | 6.0267202   | 6.13079145  | 6.1319112   |
| "Mog"     | 2.9605455   | 3.213974    | 3.074388    | 3.271907    | 3.0894127   | 2.9882977   | 3.0764718   | 3.2164164   |
| "Mogs"    | 5.7277355   | 4.9163766   | 5.5237203   | 5.166593    | 5.2511654   | 5.2572346   | 5.5898742   | 5.2410893   |
| "Morc1"   | 2.5857668   | 2.700997    | 2.643398    | 2.8020685   | 2.655637    | 2.6010056   | 2.6430333   | 2.7705796   |
| "Morc3"   | 5.4318761   | 5.566021133 | 5.604154867 | 5.741612467 | 5.501607133 | 5.659482867 | 5.675312767 | 5.8214375   |
| "Morc4"   | 2.9778473   | 3.1950812   | 3.5684712   | 3.167457    | 3.2292583   | 2.919845    | 4.1140995   | 3.2213812   |
| "Morf4l2" | 11.47804133 | 11.87684733 | 11.91797167 | 11.72290567 | 11.470734   | 11.625993   | 11.765408   | 11.60954767 |
| "Morn3"   | 2.7478392   | 2.9242747   | 2.823696    | 3.006124    | 2.8274195   | 2.7906566   | 2.822969    | 2.912346    |
| "Morn4"   | 2.38182     | 3.9906955   | 2.3582208   | 2.6528788   | 2.3398697   | 2.387169    | 2.4146037   | 2.5207403   |
| "Mos"     | 2.3051887   | 2.539643    | 2.3634312   | 2.4376884   | 2.3635714   | 2.330265    | 2.362605    | 2.4401977   |
| "Moscl1"  | 10.645282   | 2.8979802   | 3.437452    | 2.4437313   | 5.3370852   | 7.4927497   | 4.991613    | 2.9504235   |
| "Moscl2"  | 10.656532   | 9.936479    | 10.063859   | 9.924092    | 10.002217   | 10.011106   | 10.262287   | 9.672541    |
| "Mospd1"  | 10.797952   | 11.910499   | 11.209424   | 11.122011   | 11.383745   | 11.736546   | 10.549429   | 11.271787   |
| "Mospd2"  | 5.6420103   | 5.4466855   | 5.14371895  | 5.3647943   | 5.4161282   | 5.7283383   | 5.15908165  | 5.56188845  |

|             |             |             |             |             |             |             |             |             |
|-------------|-------------|-------------|-------------|-------------|-------------|-------------|-------------|-------------|
| "Mov10"     | 2.3989937   | 2.548166    | 2.4731681   | 2.5599666   | 2.465478    | 2.398161    | 2.4719183   | 2.5314775   |
| "Moxd1"     | 1.9614656   | 1.8403935   | 2.406343    | 2.1057713   | 2.404908    | 2.0161936   | 2.0229025   | 2.107053    |
| "Mpdu1"     | 5.0184684   | 4.171321    | 5.077861    | 4.920829    | 5.1548424   | 5.69889     | 5.5374894   | 5.17219     |
| "Mpdz"      | 7.03509025  | 6.88967     | 8.2140915   | 7.849493    | 8.0357667   | 7.2278225   | 7.73369075  | 8.06290225  |
| "Mpeg1"     | 9.361316    | 4.4441376   | 6.124286    | 4.861292    | 6.7028546   | 8.986306    | 8.685041    | 5.344142    |
| "Mpg"       | 4.6603116   | 5.1622785   | 4.8060978   | 5.0551668   | 4.873672    | 4.93156115  | 5.022266    | 4.82632945  |
| "Mphosph10" | 5.6816781   | 5.69047625  | 4.99108615  | 5.0204271   | 5.3508891   | 5.6439943   | 5.0029475   | 4.9214356   |
| "Mphosph6"  | 5.1838202   | 5.279597    | 5.76542     | 5.2433796   | 4.889612    | 4.829048    | 5.192096    | 5.1269536   |
| "Mphosph8"  | 6.4431419   | 7.166356167 | 5.9647488   | 6.3108411   | 6.792962667 | 6.972113567 | 6.011202567 | 6.2612299   |
| "Mphosph9"  | 3.163239567 | 2.821510967 | 3.384714833 | 3.3264726   | 3.231643533 | 3.6341993   | 3.5806833   | 3.474668667 |
| "Mpi"       | 7.0297236   | 7.3517814   | 7.417097    | 7.6942663   | 7.389234    | 7.0352283   | 7.3803115   | 7.7402325   |
| "Mpnd"      | 8.567415    | 7.837347    | 8.8093815   | 9.051359    | 8.130571    | 8.248535    | 8.740866    | 8.818356    |
| "Mpo"       | 2.2321653   | 2.28919     | 2.25356     | 2.342405    | 2.2592633   | 3.40075     | 2.2455842   | 2.3234448   |
| "Mpp1"      | 6.740804    | 6.3793826   | 7.479945    | 6.990153    | 7.9199553   | 7.6878      | 7.8887057   | 7.050008    |
| "Mpp2"      | 2.578652    | 2.6598935   | 2.641504    | 2.684184    | 2.6420848   | 2.572864    | 2.6379633   | 2.6845717   |
| "Mpp3"      | 6.4598513   | 7.887103    | 7.249078    | 7.450265    | 5.4960732   | 5.6604347   | 6.479566    | 6.752339    |
| "Mpp4"      | 2.411909    | 2.503106    | 2.4454858   | 2.5659573   | 2.4476292   | 2.4035      | 2.444548    | 2.5516653   |
| "Mpp5"      | 7.195733833 | 7.954890333 | 7.175414867 | 7.650365767 | 8.122773167 | 7.947538    | 7.2313362   | 7.921511733 |
| "Mpp6"      | 7.1128431   | 7.6861918   | 7.761947    | 8.1541955   | 7.53437085  | 7.1219005   | 7.9755099   | 8.20519265  |
| "Mpp7"      | 3.390763    | 3.566466    | 3.5755086   | 3.6967914   | 4.4857903   | 4.0021214   | 3.9986765   | 4.140108    |
| "Mprip"     | 8.586245    | 8.545464    | 8.589637    | 8.643158    | 8.750462    | 8.750879    | 8.958449    | 8.38015     |
| "Mpst"      | 5.856461    | 5.5069456   | 5.2877254   | 6.167247    | 5.967131    | 5.437498    | 5.344614    | 5.937876    |
| "Mpv17"     | 7.7371182   | 7.292444    | 8.373711    | 7.9148583   | 7.764029    | 7.373982    | 8.287571    | 8.417975    |
| "Mpv17l"    | 3.4877398   | 3.6855874   | 3.6153278   | 3.7293725   | 3.6159248   | 3.500713    | 3.5800157   | 3.6477973   |
| "Mpz"       | 8.911961    | 8.358358    | 9.521836    | 8.220587    | 9.916333    | 7.399777    | 9.45877     | 9.062481    |
| "Mpzl2"     | 7.66115975  | 3.73251485  | 3.6414792   | 3.46329105  | 3.699716    | 5.23433415  | 3.7955184   | 3.50284725  |
| "Mr1"       | 3.0216415   | 3.779618    | 3.99354     | 4.49131875  | 3.52167     | 3.3622465   | 3.80339815  | 3.8869057   |
| "Mrap"      | 5.0574105   | 4.1137761   | 4.1478861   | 2.9288496   | 5.0616418   | 5.4542534   | 5.5167462   | 3.2198491   |
| "Mras"      | 2.9220784   | 3.1271544   | 3.902199    | 3.1728837   | 3.21527     | 3.070702    | 3.7154036   | 3.1746268   |
| "Mrc1"      | 8.41392     | 5.3057003   | 8.812475    | 7.6125107   | 8.669322    | 8.808847    | 8.737826    | 7.8352985   |
| "Mrc2"      | 4.4317575   | 2.4594488   | 6.5694127   | 5.581903    | 4.942857    | 3.6818547   | 5.1604166   | 5.9569798   |
| "Mre11a"    | 3.7117965   | 3.7266006   | 4.1392794   | 3.959581    | 3.8251894   | 3.5068514   | 4.3227706   | 3.776031    |
| "Mrfap1"    | 11.561152   | 11.738491   | 11.997666   | 11.952173   | 11.66545    | 11.560614   | 11.914228   | 11.843318   |
| "Mrgrpa1"   | 2.4494705   | 2.5196302   | 2.4795606   | 2.575591    | 2.4821947   | 2.4464374   | 2.4763672   | 2.5340502   |
| "Mri1"      | 4.98516095  | 4.89774825  | 5.05779475  | 5.0516491   | 4.96203955  | 4.4912536   | 5.22010825  | 4.97388355  |
| "Mrm1"      | 4.667283    | 4.39942     | 4.493334    | 5.2745543   | 4.7048483   | 4.322215    | 4.6924334   | 4.9962707   |
| "Mrp63"     | 6.3297164   | 6.417794    | 6.39906825  | 6.76449415  | 6.30649735  | 6.0035071   | 6.6284371   | 6.6209496   |
| "Mrpl1"     | 5.214656167 | 5.666048333 | 5.717582167 | 5.9061033   | 5.357519233 | 5.4121597   | 5.481730367 | 5.902338367 |
| "Mrpl10"    | 7.0169477   | 7.1430464   | 7.2143383   | 7.353531    | 7.0207667   | 6.9084234   | 7.439101    | 7.1412444   |
| "Mrpl11"    | 7.568509525 | 7.766508125 | 7.757640475 | 7.943455125 | 7.657269375 | 7.4582606   | 7.803123175 | 7.82477545  |
| "Mrpl12"    | 10.806164   | 10.643997   | 11.126209   | 11.287418   | 10.866889   | 10.321945   | 11.108319   | 11.214354   |
| "Mrpl13"    | 9.0100359   | 9.17802     | 9.301692667 | 9.777133    | 9.113812667 | 8.641779567 | 9.172995233 | 9.640622    |
| "Mrpl14"    | 8.506892    | 8.311229    | 8.411384    | 8.565286    | 8.381337    | 8.098572    | 8.707593    | 8.491195    |
| "Mrpl15"    | 6.862668586 | 7.125004443 | 6.959272657 | 7.068911171 | 6.909803971 | 6.675010729 | 6.858840271 | 7.012598914 |
| "Mrpl16"    | 9.869985    | 10.403358   | 10.183828   | 10.447746   | 10.300854   | 10.211765   | 9.932633    | 10.317118   |
| "Mrpl17"    | 6.1534622   | 6.11415935  | 6.12636465  | 6.22723285  | 6.058541    | 5.9468893   | 6.2894697   | 6.0781265   |
| "Mrpl18"    | 10.808554   | 10.549919   | 11.187004   | 11.497891   | 10.889072   | 10.043868   | 11.273839   | 11.510572   |
| "Mrpl19"    | 5.264951667 | 5.210911267 | 5.551218067 | 6.0160701   | 5.442829667 | 4.9571338   | 5.617472067 | 5.9045791   |
| "Mrpl2"     | 10.387705   | 10.2946825  | 10.598096   | 10.722825   | 10.405842   | 10.083898   | 10.751627   | 10.551342   |
| "Mrpl20"    | 9.172954    | 9.536715    | 9.394849    | 9.435088    | 9.492856    | 9.269679    | 9.711229    | 9.231776    |
| "Mrpl21"    | 5.9648868   | 6.09453325  | 5.97863135  | 6.14770975  | 5.93489575  | 5.8525211   | 6.00781415  | 6.13667645  |
| "Mrpl22"    | 8.397037    | 8.818013    | 9.1248255   | 9.050226    | 8.924674    | 8.723729    | 9.011208    | 8.943866    |
| "Mrpl23"    | 10.852151   | 11.36616    | 11.456545   | 11.343003   | 11.019721   | 10.697745   | 11.401925   | 11.250876   |
| "Mrpl24"    | 10.273564   | 10.340572   | 10.273931   | 10.296513   | 10.381201   | 10.44038    | 10.467126   | 10.333445   |
| "Mrpl27"    | 10.636192   | 10.814838   | 10.823292   | 10.621839   | 10.718005   | 10.404361   | 10.62562    | 10.634039   |
| "Mrpl28"    | 8.1300978   | 8.1876138   | 8.633760667 | 8.708448    | 8.382208333 | 7.956255667 | 8.399545667 | 8.733247333 |
| "Mrpl3"     | 6.707279567 | 6.8228505   | 6.774292833 | 7.084486433 | 7.108381467 | 6.955490467 | 6.7234078   | 7.177820667 |
| "Mrpl32"    | 10.105908   | 10.765797   | 10.402898   | 10.511081   | 10.498833   | 10.517713   | 10.335706   | 10.464123   |
| "Mrpl33"    | 6.6012775   | 6.5965333   | 6.67933215  | 6.754664    | 6.6349288   | 6.4732674   | 6.67780375  | 6.780025    |
| "Mrpl34"    | 9.089726    | 8.820432    | 9.229631    | 9.338262    | 9.053129    | 8.591295    | 9.499744    | 9.170211    |
| "Mrpl35"    | 6.37985565  | 6.56463325  | 6.3921515   | 6.4742751   | 6.41226225  | 6.3358671   | 6.46739225  | 6.3377674   |
| "Mrpl36"    | 7.8486724   | 7.8681617   | 8.09521     | 8.408438    | 8.056357    | 7.671595    | 8.188136    | 8.144054    |
| "Mrpl37"    | 8.118138    | 7.891467    | 8.208116    | 8.031748    | 8.205484    | 7.77676     | 8.469504    | 8.16174     |
| "Mrpl38"    | 5.7005964   | 5.92143405  | 5.7479014   | 5.8529809   | 5.6856123   | 5.49892795  | 5.78706465  | 5.8269769   |
| "Mrpl39"    | 9.540418    | 9.2384375   | 9.55040425  | 9.724353    | 9.64594     | 9.3674345   | 9.797651    | 9.6861795   |
| "Mrpl4"     | 8.397368    | 8.608686    | 8.8168      | 8.918915    | 8.750924    | 8.439157    | 8.930015    | 8.859773    |
| "Mrpl40"    | 8.569939    | 8.475056    | 8.398494    | 8.659386    | 8.729282    | 7.9956      | 8.792221    | 8.536411    |
| "Mrpl41"    | 7.610175267 | 8.896399333 | 6.8550344   | 7.001728    | 8.196896    | 8.634637433 | 7.0186106   | 6.997329667 |
| "Mrpl42"    | 12.510238   | 12.703717   | 13.083952   | 13.223486   | 12.893608   | 12.354184   | 12.818907   | 13.048646   |
| "Mrpl43"    | 9.770785    | 9.554558    | 9.406237    | 9.678297    | 9.518716    | 9.244197    | 10.021025   | 9.628372    |
| "Mrpl44"    | 7.967655067 | 8.207190667 | 7.919179333 | 8.206756333 | 8.255956333 | 7.926759767 | 7.8485331   | 8.6340339   |
| "Mrpl45"    | 8.899384    | 8.8298025   | 8.855793    | 9.141344    | 8.84441     | 8.715202    | 9.1690645   | 9.02945     |
| "Mrpl46"    | 8.219154    | 8.233387    | 8.449363    | 8.6078825   | 8.390676    | 8.293082    | 8.160406    | 8.440502    |
| "Mrpl47"    | 9.057822    | 9.495066    | 9.080854    | 9.615026    | 9.658027    | 9.865705    | 9.083884    | 9.2888775   |
| "Mrpl48"    | 8.802437    | 8.6255465   | 9.30927675  | 9.4897525   | 8.807195    | 8.34583175  | 9.05413725  | 9.25241675  |
| "Mrpl49"    | 7.1490758   | 7.175664    | 7.40072375  | 7.708123    | 7.31765515  | 7.0054435   | 7.38000785  | 7.726358    |
| "Mrpl50"    | 7.420543    | 7.85851785  | 7.48891735  | 7.92639575  | 8.0437705   | 8.0712383   | 7.6190092   | 7.94785065  |
| "Mrpl51"    | 6.777284333 | 7.112327    | 7.442324667 | 7.600597233 | 7.173202767 | 7.136900433 | 7.7828091   | 7.778231667 |
| "Mrpl52"    | 8.2471864   | 8.373861925 | 8.405299825 | 8.503554875 | 8.2293047   | 7.88682185  | 8.6160751   | 8.2930395   |
| "Mrpl54"    | 9.377427    | 9.720661    | 9.470466    | 9.930974    | 9.306385    | 9.162017    | 9.636092    | 9.83745     |
| "Mrpl55"    | 8.464659    | 8.680803    | 8.542826    | 8.976166    | 8.627928    | 8.205923    | 8.951887    | 8.697842    |

|           |             |             |             |             |             |             |             |             |
|-----------|-------------|-------------|-------------|-------------|-------------|-------------|-------------|-------------|
| "Mrpl9"   | 8.34490265  | 8.64181835  | 7.5355565   | 7.98482025  | 8.289225    | 8.4705453   | 7.75557575  | 8.1225025   |
| "Mrps11"  | 4.81613895  | 4.94567065  | 5.03572035  | 5.2991306   | 4.81850695  | 4.6251658   | 4.98105775  | 5.1600638   |
| "Mrps12"  | 9.5417385   | 9.074544    | 9.505329    | 9.657077    | 9.561177    | 9.0167885   | 9.748452    | 9.500603    |
| "Mrps14"  | 7.699427    | 8.1690035   | 8.341656    | 8.1642348   | 7.99829715  | 7.6664492   | 7.9935751   | 8.2541875   |
| "Mrps15"  | 9.7572295   | 10.0259645  | 10.221842   | 10.478719   | 9.7729865   | 9.3280365   | 10.5022185  | 10.3177775  |
| "Mrps16"  | 9.775059    | 9.450927    | 10.362355   | 10.347871   | 9.817224    | 9.289293    | 10.789122   | 10.238688   |
| "Mrps17"  | 9.546829    | 9.909675    | 9.428639    | 9.772819    | 9.765989    | 9.603754    | 9.487191    | 9.588301    |
| "Mrps18a" | 10.549591   | 10.617929   | 10.1313095  | 10.52195    | 10.246095   | 10.209704   | 10.469385   | 10.377693   |
| "Mrps18b" | 9.296938    | 9.73735     | 9.21743     | 9.094724    | 9.321613    | 9.513077    | 9.317841    | 8.998891    |
| "Mrps18c" | 10.264493   | 10.233532   | 10.264267   | 10.365904   | 10.088778   | 9.896137    | 10.337095   | 10.195386   |
| "Mrps2"   | 5.7253708   | 5.92719175  | 5.40482855  | 5.7682005   | 5.9449921   | 5.7416821   | 5.829443    | 5.63498     |
| "Mrps21"  | 10.838785   | 11.060888   | 11.336525   | 11.388938   | 10.8853245  | 10.376805   | 11.305174   | 11.330508   |
| "Mrps22"  | 8.575635    | 8.827068    | 9.248814    | 9.333331    | 8.644944    | 8.741112    | 9.167797    | 9.203372    |
| "Mrps23"  | 8.27829725  | 8.1050057   | 8.228776    | 8.5043557   | 8.307837    | 7.774213    | 8.580273    | 8.62784225  |
| "Mrps24"  | 10.36412325 | 10.3834035  | 10.7135415  | 10.7221195  | 10.346998   | 9.855752    | 10.8779015  | 10.6453055  |
| "Mrps25"  | 4.978042067 | 5.033369133 | 5.1551874   | 5.2560917   | 4.965269    | 4.688716467 | 5.1991741   | 5.260664    |
| "Mrps26"  | 8.812119    | 8.892273    | 8.941311    | 8.953427    | 8.886816    | 8.386553    | 9.006372    | 9.016796    |
| "Mrps28"  | 10.188051   | 10.405234   | 10.904136   | 11.075491   | 10.484923   | 10.219927   | 10.444369   | 11.060459   |
| "Mrps30"  | 8.900054    | 9.055364    | 8.530518    | 8.658339    | 8.855751    | 8.687619    | 9.173144    | 8.688438    |
| "Mrps31"  | 8.802407    | 9.200104    | 9.054933    | 9.114472    | 9.155401    | 8.809515    | 8.879065    | 9.195458    |
| "Mrps33"  | 9.829426    | 9.855592    | 10.074479   | 10.125519   | 9.931951    | 9.454874    | 10.182495   | 10.240196   |
| "Mrps34"  | 8.347724    | 8.408205    | 8.568643    | 8.4495415   | 8.3651327   | 8.18658985  | 8.7506465   | 8.3189245   |
| "Mrps35"  | 8.510084    | 8.217099    | 8.415064    | 8.328922    | 8.5944195   | 8.0462265   | 8.638243    | 8.385078    |
| "Mrps36"  | 10.267083   | 10.077891   | 10.768734   | 10.76206    | 10.575617   | 10.008776   | 10.659708   | 10.769586   |
| "Mrps5"   | 6.63832285  | 6.8759535   | 6.6880715   | 7.0352676   | 6.82440835  | 6.54800085  | 6.95572     | 7.1812445   |
| "Mrps6"   | 7.862175    | 7.7264457   | 8.767273    | 8.157076    | 8.235453    | 7.780213    | 8.269766    | 8.378225    |
| "Mrps7"   | 9.498926    | 9.680111    | 9.689428    | 9.931342    | 9.514743    | 9.191396    | 9.951572    | 9.642725    |
| "Mrps9"   | 6.819745    | 7.244499175 | 6.850071175 | 7.17167775  | 7.11225135  | 7.08524805  | 6.856529025 | 7.23583985  |
| "Mrpf"    | 7.4328017   | 6.8465304   | 7.0093536   | 6.896401    | 7.121111    | 7.329287    | 7.326094    | 7.1814027   |
| "Mrvi1"   | 3.2722936   | 3.4186454   | 3.5511231   | 4.162426    | 3.4598024   | 4.323414    | 3.52476     | 4.471325    |
| "Ms4a1"   | 2.50578975  | 2.7061072   | 2.63008655  | 2.74112435  | 2.61148975  | 6.7544706   | 2.6007575   | 2.6871393   |
| "Ms4a4b"  | 2.6384621   | 2.7648406   | 2.69784045  | 2.83779765  | 2.7035431   | 5.169131    | 2.7350428   | 2.7934507   |
| "Ms4a4c"  | 2.4547476   | 2.5329266   | 2.4566983   | 2.5883205   | 2.4864018   | 3.5364441   | 2.7284845   | 2.5701524   |
| "Ms4a4d"  | 8.352646    | 8.789776    | 8.068249    | 8.333538    | 8.889481    | 9.305635    | 8.491302    | 8.456769    |
| "Ms4a6b"  | 7.585891    | 4.572126    | 5.868243    | 4.645841    | 7.2099895   | 9.022024    | 7.850167    | 5.851768    |
| "Ms4a6c"  | 6.9206023   | 5.238795    | 5.2033496   | 5.2551274   | 6.409761    | 7.2301364   | 6.2235694   | 5.225424    |
| "Ms4a6d"  | 5.192046333 | 3.341968833 | 3.744139067 | 3.707216667 | 4.1463924   | 4.447407667 | 4.921819133 | 3.75625133  |
| "Ms4a7"   | 4.370075    | 3.4101176   | 3.7723982   | 3.4438071   | 4.137037    | 5.0210657   | 6.098524    | 3.6037495   |
| "Ms4a8a"  | 4.651804    | 2.321621    | 2.2674174   | 2.2766137   | 2.9666557   | 4.1972055   | 2.2064013   | 2.2676344   |
| "Msc"     | 4.1129217   | 4.975361    | 3.7258198   | 3.4306855   | 5.623186    | 6.414942    | 3.806379    | 3.7524142   |
| "Msh2"    | 3.7003992   | 3.94211795  | 4.023303    | 4.2804255   | 4.06203175  | 3.8934326   | 4.0454249   | 4.0972207   |
| "Msh3"    | 4.07040855  | 4.121897    | 4.4256275   | 4.6624285   | 4.09823685  | 4.00488035  | 4.0865115   | 4.3939619   |
| "Msh4"    | 2.369214    | 2.43791     | 2.3936067   | 2.5012548   | 2.3941853   | 2.3473089   | 2.392829    | 2.4923189   |
| "Msh6"    | 4.5108647   | 4.4547415   | 4.3056855   | 4.844472    | 4.78115     | 4.7903986   | 4.939295    | 5.1609483   |
| "Msi1"    | 2.452893    | 2.634408    | 2.5903728   | 2.69467     | 2.5908177   | 2.5569596   | 2.58903     | 2.6634357   |
| "Msi2"    | 3.99378455  | 4.0675896   | 4.31022375  | 4.68877     | 4.0553253   | 3.7965635   | 4.2179925   | 4.39724645  |
| "Msl1"    | 6.94523405  | 7.082791575 | 7.5251808   | 7.54431165  | 7.2961273   | 7.257302575 | 7.35782375  | 7.68400595  |
| "Msl2"    | 6.965533067 | 7.6602553   | 7.2792168   | 7.447247567 | 7.565776567 | 7.578175467 | 7.166727067 | 7.4874617   |
| "Msl3"    | 8.163923    | 8.12244     | 8.247484    | 8.522915    | 8.467135    | 8.219163    | 8.342289    | 8.683116    |
| "Msl3l2"  | 2.4066076   | 2.5233798   | 2.4212847   | 2.4886436   | 2.4280586   | 2.392412    | 2.4191883   | 2.4896584   |
| "Msln"    | 5.0806804   | 3.1732051   | 2.9861083   | 3.211964    | 3.1908457   | 2.9468062   | 4.7975545   | 3.1722295   |
| "Msn"     | 6.8344875   | 6.2758171   | 6.68490835  | 6.639758    | 6.48299135  | 6.84481975  | 6.8355295   | 6.679559    |
| "Msr1"    | 3.969829125 | 3.46343835  | 3.230110125 | 3.357337625 | 3.26533625  | 3.631830025 | 3.281258875 | 3.34193465  |
| "Msra"    | 7.5568185   | 6.5274115   | 6.848155    | 7.101245    | 6.8586755   | 6.8285284   | 6.7784576   | 7.0557404   |
| "Msrb2"   | 4.8996468   | 5.0062847   | 6.333062    | 6.5170803   | 5.669443    | 6.1607795   | 5.1280355   | 6.672557    |
| "Mst1"    | 6.5614853   | 2.3990135   | 2.397416    | 2.4483123   | 2.3875885   | 2.3121996   | 2.3463173   | 2.4394226   |
| "Mst1r"   | 2.4745667   | 2.5847778   | 2.5543554   | 2.6400878   | 2.7868004   | 2.53547     | 2.5584583   | 2.6309693   |
| "Msto1"   | 4.028849    | 3.8934917   | 4.126928    | 4.1919713   | 4.361225    | 4.1012254   | 4.3445      | 3.7412565   |
| "Msx1"    | 3.1429818   | 3.2129684   | 3.2645948   | 3.3535334   | 3.20613885  | 3.0945406   | 3.2033993   | 3.5600472   |
| "Msx2"    | 2.3108227   | 2.3851798   | 2.3304775   | 2.4047425   | 2.3314807   | 2.3052685   | 2.3304558   | 2.3937428   |
| "Msx3"    | 2.8273728   | 2.8757188   | 2.8400154   | 2.8838944   | 2.839684    | 2.8140364   | 2.835845    | 2.9125066   |
| "Mt1"     | 11.1237175  | 10.427512   | 6.9133657   | 6.7426168   | 9.03912545  | 8.8371525   | 9.9773405   | 7.6916103   |
| "Mt2"     | 13.716499   | 13.053171   | 9.814194    | 8.22777     | 12.756849   | 12.591182   | 12.367736   | 9.237515    |
| "Mt3"     | 5.84952     | 3.9227798   | 3.67416     | 3.803869    | 4.25251     | 3.637464    | 6.584984    | 3.718162    |
| "Mt4"     | 3.490831    | 2.9217472   | 4.2780886   | 2.9658837   | 2.843501    | 2.7971976   | 5.7759933   | 2.9440343   |
| "Mta1"    | 5.8206935   | 6.0703187   | 6.4803443   | 6.456101    | 6.2544622   | 6.2176924   | 6.760956    | 6.4089313   |
| "Mta2"    | 3.9160566   | 3.9553425   | 3.93326     | 3.9362009   | 3.9359891   | 4.623981    | 3.930398    | 3.9671009   |
| "Mta3"    | 4.535484    | 4.477038    | 4.36403095  | 4.54945225  | 5.1073727   | 5.22026115  | 4.59169245  | 4.3708945   |
| "Mtap"    | 5.491729625 | 5.798761075 | 6.2815255   | 5.94863195  | 5.637925925 | 5.70122275  | 6.445135525 | 6.1018097   |
| "Mtap1b"  | 6.77994     | 6.3927593   | 6.8373303   | 6.1309776   | 5.680266    | 5.8403835   | 6.491289    | 6.145678    |
| "Mtap1s"  | 5.462727    | 6.223439    | 5.4214      | 5.4878163   | 5.4214683   | 5.555773    | 5.7424083   | 5.2179937   |
| "Mtap4"   | 7.975431733 | 8.248976333 | 7.915577    | 8.001066667 | 7.921063567 | 7.646727333 | 7.912247567 | 8.0191692   |
| "Mtap6"   | 3.6811047   | 3.8116493   | 3.77001     | 3.8429592   | 3.773347    | 3.7192342   | 3.7682118   | 3.8968115   |
| "Mtap7"   | 4.1757896   | 4.3011047   | 3.91241435  | 4.0570564   | 4.0155124   | 4.1534241   | 3.40388     | 3.997637    |
| "Mtap7d1" | 9.155508    | 9.074381    | 10.008731   | 10.379333   | 9.356885    | 9.124167    | 9.635039    | 10.008676   |
| "Mtbp"    | 2.3493316   | 2.3586507   | 2.3182132   | 2.3778844   | 2.313489    | 2.2816548   | 2.316136    | 2.3795204   |
| "Mtch1"   | 7.5782833   | 7.0973406   | 7.198005    | 7.4765954   | 7.266699    | 7.0396476   | 7.554144    | 7.3061843   |
| "Mtch2"   | 6.211955717 | 6.348228617 | 6.290897233 | 6.39051095  | 6.27004095  | 6.30236775  | 6.442720317 | 6.378840267 |
| "Mtcp1"   | 4.7658871   | 4.882922067 | 4.8695946   | 5.178343233 | 4.8570663   | 4.8996889   | 4.901908467 | 4.913637667 |
| "Mtdh"    | 9.02125625  | 9.15362375  | 9.27084725  | 9.3071      | 9.073622875 | 8.762819875 | 9.53007725  | 9.33763825  |
| "Mterfd1" | 9.731705    | 10.143902   | 9.385327    | 9.624785    | 9.987191    | 10.296564   | 9.438676    | 9.758419    |

|           |             |             |             |             |             |             |             |             |
|-----------|-------------|-------------|-------------|-------------|-------------|-------------|-------------|-------------|
| "Mterfd2" | 6.82051     | 7.2236586   | 6.228718    | 6.470103    | 6.972559    | 6.798092    | 6.3995094   | 6.5535893   |
| "Mterfd3" | 6.7302966   | 6.0219774   | 7.3611307   | 8.149036    | 7.20905     | 5.579649    | 7.4814935   | 8.396778    |
| "Mtf1"    | 5.26620015  | 5.5435565   | 5.629242    | 5.17204635  | 4.8631041   | 5.0812242   | 4.876554    | 4.96530325  |
| "Mtf2"    | 5.773925125 | 6.11894765  | 6.322590525 | 6.446502    | 6.139048    | 6.451850675 | 6.60752845  | 6.555109    |
| "Mtfmt"   | 4.865636    | 4.9783583   | 5.237026    | 6.0029945   | 5.34504     | 5.074807    | 5.329052    | 5.4910674   |
| "Mtfp1"   | 8.650057    | 7.8483562   | 9.152674    | 9.825947    | 8.656418    | 7.925325    | 8.614143    | 9.752673    |
| "Mtftr1"  | 5.3608772   | 4.83791795  | 5.518335    | 6.02261995  | 5.3471549   | 4.9037219   | 5.73762825  | 6.54678365  |
| "Mtg1"    | 7.51668     | 7.623966    | 7.7625046   | 7.8457136   | 7.7217855   | 7.2850723   | 7.5349426   | 7.9261312   |
| "Mthfd1"  | 7.449958633 | 6.971231433 | 7.348935533 | 7.468175567 | 6.976266867 | 6.4363522   | 6.941073567 | 7.5151459   |
| "Mthfd2"  | 4.312735    | 4.6816835   | 4.776045    | 4.969015    | 4.3090525   | 4.2682076   | 4.336653    | 4.4018044   |
| "Mthfr"   | 5.2370987   | 4.729597    | 4.2865434   | 4.473753    | 5.5300074   | 5.7537737   | 4.9171276   | 4.2212925   |
| "Mtif2"   | 8.066402    | 8.194051    | 8.421801    | 9.1705475   | 8.333292    | 7.830423    | 8.667446    | 9.019323    |
| "Mtm1"    | 5.909176467 | 6.603389767 | 6.707266433 | 6.166073467 | 5.942964233 | 5.982853067 | 6.2016416   | 6.2092488   |
| "Mtmr1"   | 5.2582569   | 6.0183431   | 4.95458865  | 5.06776     | 5.3695507   | 6.33049785  | 5.19042525  | 4.9549077   |
| "Mtmr10"  | 7.3409343   | 7.0964017   | 7.095204    | 7.304236    | 7.3360925   | 7.1451583   | 7.824915    | 7.105713    |
| "Mtmr14"  | 7.934516    | 8.8620615   | 7.467735    | 7.4574156   | 8.344525    | 8.3055      | 7.4605913   | 7.8493166   |
| "Mtmr2"   | 5.73525135  | 6.13950485  | 5.850245    | 6.1779213   | 6.17010135  | 6.1860261   | 6.05182955  | 6.2507739   |
| "Mtmr3"   | 3.235013    | 3.013773    | 2.7875373   | 3.290758    | 3.0031073   | 2.9892592   | 2.7826316   | 3.0023782   |
| "Mtmr4"   | 3.7953552   | 4.26961305  | 3.1801802   | 3.49640205  | 4.0607226   | 4.8800595   | 3.5542922   | 3.2920198   |
| "Mtmr6"   | 8.115633075 | 8.753934175 | 8.771298175 | 9.34305475  | 8.53279675  | 8.286911    | 8.6964181   | 9.19510525  |
| "Mtmr9"   | 4.6489927   | 4.4056237   | 5.2340973   | 5.123490167 | 4.944893    | 5.2034048   | 5.675205    | 5.095976    |
| "Mtnr1a"  | 2.2866762   | 2.384803    | 2.3275582   | 2.4290516   | 2.3300526   | 2.2937758   | 2.3261983   | 2.4206421   |
| "Mto1"    | 5.2844385   | 5.61883705  | 5.475505    | 5.60961075  | 5.42573575  | 5.526919    | 5.3554479   | 5.5545865   |
| "Mtor"    | 8.875286    | 8.591436    | 8.024736    | 8.160524    | 8.4354105   | 8.526463    | 8.414556    | 8.264245    |
| "Mtpn"    | 7.6955439   | 7.0224392   | 7.4199378   | 7.1364705   | 7.36155524  | 7.57017574  | 7.68810368  | 7.24289884  |
| "Mtrr"    | 5.8416395   | 6.654208    | 6.5349264   | 7.1707697   | 6.2451487   | 5.669447    | 6.4159746   | 6.9285765   |
| "Mts1"    | 6.405242833 | 5.063963833 | 5.7299877   | 5.6529411   | 5.604931167 | 5.245233833 | 5.716176767 | 5.5171579   |
| "Mttp"    | 5.15105035  | 2.5939069   | 2.59436235  | 2.6240554   | 2.56033755  | 2.4617032   | 2.5593213   | 2.6139861   |
| "Mtx1"    | 7.0881948   | 7.09707185  | 7.17728765  | 7.02087775  | 7.1412645   | 7.18647055  | 7.1919277   | 6.994077    |
| "Mtx2"    | 8.972011    | 8.402779    | 8.750395    | 9.30987     | 9.22291     | 8.397099    | 9.196921    | 9.366676    |
| "Muc13"   | 3.4556181   | 3.84411205  | 3.8049115   | 3.85764915  | 3.7258525   | 3.6570461   | 3.70640165  | 3.79721245  |
| "Muc3"    | 2.495973    | 2.5672178   | 2.5277994   | 2.622324    | 2.5342996   | 2.5003557   | 2.5335515   | 2.6099048   |
| "Muc5b"   | 2.3906248   | 2.495792    | 2.4317982   | 2.5340526   | 2.4225957   | 2.3962884   | 2.4159703   | 2.507761    |
| "Muc1"    | 3.048463    | 3.19676     | 3.2521772   | 3.258019    | 3.106662    | 3.0558844   | 3.1060348   | 3.1928363   |
| "Mudeng"  | 4.3671794   | 4.6922706   | 4.7353018   | 4.8823075   | 4.614934733 | 4.642602667 | 4.681632567 | 4.882982067 |
| "Mug-ps1" | 10.885075   | 3.1824903   | 4.384873    | 3.2480838   | 3.248311    | 2.8867533   | 3.0748863   | 3.2568028   |
| "Mug1"    | 10.825929   | 2.6076655   | 4.362365    | 2.65792     | 4.0379877   | 2.484064    | 2.5733407   | 3.9841673   |
| "Mul1"    | 5.4023147   | 5.7578508   | 4.94130805  | 5.409497    | 5.424965    | 5.0853766   | 5.2218478   | 5.21528375  |
| "Mum1"    | 6.254517    | 6.1777716   | 7.1831136   | 7.005917    | 7.173857    | 6.535223    | 7.31681     | 7.248427    |
| "Mup3"    | 4.6240244   | 3.7638016   | 3.69392525  | 3.8801329   | 4.13821115  | 3.5436854   | 3.649147    | 4.8684789   |
| "Mup4"    | 2.806263    | 2.9169729   | 2.8445451   | 2.9616802   | 2.837962    | 2.7444546   | 2.8049664   | 2.9475753   |
| "Murc"    | 9.978669    | 10.871973   | 10.52688    | 10.263804   | 10.441662   | 9.619017    | 10.440954   | 10.39093    |
| "Mus81"   | 5.9309215   | 5.95164875  | 6.665317    | 6.66976465  | 5.6905145   | 5.7382687   | 6.279717    | 6.50559405  |
| "Musk"    | 6.7110624   | 8.487542    | 2.6445029   | 3.8993495   | 3.3314507   | 7.1927037   | 3.7947888   | 3.6332296   |
| "Mustn1"  | 11.733652   | 11.302767   | 10.314533   | 9.489803    | 10.940144   | 12.380563   | 12.057793   | 9.680883    |
| "Mut"     | 7.158395433 | 7.0997611   | 7.3195969   | 7.3555156   | 7.325454267 | 7.2166205   | 7.11839     | 7.470233833 |
| "Muted"   | 7.5789836   | 4.845658    | 6.241131    | 6.588126    | 5.572097    | 4.873554    | 6.9295435   | 6.6622915   |
| "Mutyh"   | 2.6178129   | 2.711269    | 2.7700536   | 2.776896    | 2.7438984   | 2.691472    | 2.6717186   | 2.7502594   |
| "Mvd"     | 3.1519904   | 2.2678342   | 2.3143209   | 2.59327125  | 2.4105239   | 2.205829    | 2.4226357   | 2.46378175  |
| "Mvk"     | 3.6615712   | 3.45764135  | 3.3498755   | 3.52837615  | 3.35558795  | 3.1531895   | 3.35218655  | 3.4357818   |
| "Mvp"     | 5.986308    | 4.4860353   | 4.6307607   | 4.8512144   | 5.215971    | 5.06063     | 5.7835236   | 4.7631226   |
| "Mx1"     | 3.2381039   | 2.973753    | 2.8697703   | 2.9943068   | 2.875173    | 2.7813294   | 3.3893294   | 2.9731085   |
| "Mx2"     | 2.660182    | 2.2166944   | 2.1812608   | 2.2288418   | 2.1831832   | 2.152338    | 2.1803155   | 2.2464736   |
| "Mxd1"    | 2.6459045   | 2.6857157   | 2.6628344   | 2.7205777   | 2.6654894   | 2.6395676   | 2.6608295   | 2.713318    |
| "Mxd3"    | 2.77495315  | 2.94392075  | 2.8730919   | 2.96252025  | 2.8756572   | 2.78686885  | 2.86511825  | 2.9820416   |
| "Mxd4"    | 4.92917275  | 5.5977441   | 5.004604675 | 4.822435525 | 5.335032375 | 5.318382875 | 5.08994055  | 4.89967965  |
| "Mxi1"    | 6.42227565  | 6.40366335  | 6.7845349   | 6.7757978   | 6.1443506   | 6.30793     | 6.471948    | 6.92828475  |
| "Mxra8"   | 8.492244    | 7.969431    | 9.269126    | 8.255123    | 8.850942    | 8.691321    | 8.730378    | 8.399893    |
| "Myadm"   | 8.6408925   | 7.28060075  | 9.304724    | 8.8257365   | 8.6096485   | 8.9956545   | 9.316588    | 8.856189    |
| "Myb"     | 2.5077139   | 2.674032233 | 2.642075533 | 2.763094933 | 2.588297167 | 2.998225233 | 2.5944114   | 2.684214833 |
| "Mybbp1a" | 8.1815813   | 8.8969395   | 7.9410375   | 8.0127015   | 8.34331615  | 8.4456949   | 8.048551    | 8.0357574   |
| "Mybl1"   | 2.9088538   | 3.1581607   | 2.9920225   | 3.1216652   | 3.0001888   | 2.9482603   | 2.9902093   | 3.097803    |
| "Mybl2"   | 2.7584257   | 2.8486779   | 2.7907398   | 2.9114265   | 2.8016942   | 2.7343585   | 2.7769508   | 2.8867002   |
| "Mybph"   | 11.607671   | 10.389495   | 11.621372   | 10.124122   | 11.133576   | 10.020484   | 12.153883   | 11.459998   |
| "Myc"     | 8.591481    | 6.7079144   | 5.5862894   | 5.7573614   | 6.122711    | 6.2929063   | 6.1536584   | 5.633861    |
| "Mycbp"   | 5.6072458   | 5.91844164  | 5.97163072  | 6.21250316  | 5.71552652  | 5.46095858  | 5.97593804  | 6.29655136  |
| "Mycbp2"  | 9.418686    | 9.376677    | 9.542795    | 9.342278    | 9.469077    | 9.2316265   | 9.603611    | 9.318367    |
| "Mycbpap" | 3.228032    | 3.5159      | 3.3687997   | 3.5516205   | 3.3897605   | 3.2789857   | 3.3317254   | 3.468053    |
| "Mycl1"   | 2.638961    | 2.7817323   | 2.6608574   | 2.743585    | 4.4429054   | 4.0823784   | 2.6599605   | 2.7375188   |
| "Mycn"    | 3.0720021   | 3.3006837   | 3.757495567 | 3.363904467 | 3.215528567 | 3.141987    | 3.221384    | 3.422028967 |
| "Mycs"    | 2.4983518   | 2.568897    | 2.542786    | 2.6772478   | 2.5421855   | 2.5152395   | 2.539654    | 2.5921266   |
| "Myct1"   | 5.691958    | 6.1684747   | 6.367446    | 6.509809    | 6.5186577   | 6.179756    | 6.0289383   | 7.296482    |
| "Myd88"   | 5.031521    | 5.032831    | 4.945196    | 4.7231555   | 5.0492      | 5.2848954   | 5.2764206   | 5.0711956   |
| "Myef2"   | 3.3048264   | 3.31901215  | 3.2816435   | 3.4058767   | 3.26915665  | 3.25851865  | 3.29424145  | 3.391442    |
| "Myeov2"  | 11.5076475  | 11.465809   | 11.383711   | 11.467289   | 11.27600275 | 11.039571   | 11.5665605  | 11.366297   |
| "Myf5"    | 5.059228    | 4.609194    | 4.5625196   | 5.109948    | 4.8529215   | 3.6943343   | 5.60908     | 5.2137084   |
| "Myf6"    | 11.663273   | 10.309324   | 10.681946   | 10.885248   | 10.454274   | 9.706998    | 10.985943   | 10.862497   |
| "Myg1"    | 6.490097    | 6.4769263   | 6.489327    | 6.516125    | 6.502038    | 6.4835534   | 6.53825     | 6.8167915   |
| "Myh1"    | 11.4470198  | 11.30283187 | 11.40382933 | 11.6619689  | 11.88402867 | 11.24356547 | 11.17518457 | 11.64853583 |
| "Myh11"   | 5.0783887   | 5.46611645  | 5.12530495  | 5.20088335  | 5.42857055  | 5.2777723   | 5.0838584   | 5.1496054   |
| "Myh14"   | 7.0560246   | 7.0740147   | 6.4859185   | 7.0179796   | 6.954438    | 7.0732985   | 7.0369077   | 6.645027    |

|           |             |             |             |             |             |             |             |             |
|-----------|-------------|-------------|-------------|-------------|-------------|-------------|-------------|-------------|
| "Myh2"    | 14.777674   | 13.324566   | 14.620849   | 14.860802   | 14.719884   | 14.043104   | 14.725703   | 15.223412   |
| "Myh3"    | 9.838896    | 4.4859066   | 6.4913054   | 6.904511    | 7.0050726   | 4.3570604   | 9.708744    | 7.364139    |
| "Myh4"    | 15.519017   | 15.76493    | 15.7890415  | 15.71706    | 15.731203   | 15.752583   | 15.674868   | 15.652842   |
| "Myh6"    | 5.33979675  | 4.479611    | 4.8106184   | 5.284796775 | 5.92506245  | 4.530033225 | 5.22846565  | 5.3471062   |
| "Myh7"    | 12.7441845  | 8.77856     | 10.898179   | 11.922945   | 13.264324   | 9.852017    | 12.286189   | 12.320434   |
| "Myh8"    | 8.397374    | 5.71053     | 5.679465    | 5.872117    | 5.7723994   | 5.4189625   | 7.045373    | 5.786268    |
| "Myh9"    | 7.9558469   | 7.06681705  | 7.89880615  | 7.73710745  | 7.820953525 | 8.482956075 | 8.0943669   | 7.861573475 |
| "Myl1"    | 15.4558735  | 15.553271   | 15.621496   | 15.568792   | 15.512475   | 15.557871   | 15.35446    | 15.595729   |
| "Myl10"   | 6.747085    | 3.2083666   | 3.795729    | 5.261227    | 7.239518    | 5.390195    | 6.100662    | 6.4276657   |
| "Myl12a"  | 11.503104   | 10.5795735  | 10.5908605  | 10.58387    | 11.225253   | 10.7398355  | 10.9724025  | 11.077251   |
| "Myl12b"  | 9.856469    | 8.483389    | 9.623703    | 8.806178    | 9.529177    | 10.155714   | 9.495586    | 8.9691      |
| "Myl2"    | 14.000215   | 11.87831    | 12.832096   | 13.590223   | 14.1366825  | 11.805652   | 13.599783   | 13.880285   |
| "Myl3"    | 12.38489933 | 9.873631667 | 11.24971383 | 12.58071333 | 12.36618567 | 10.730995   | 11.89935967 | 12.99473417 |
| "Myl4"    | 6.3685552   | 5.0027165   | 5.74529485  | 5.15674415  | 5.61727705  | 4.7045632   | 6.4406282   | 5.38596405  |
| "Myl6"    | 5.4817805   | 6.856556    | 6.9188766   | 6.6715503   | 7.0942745   | 6.476401    | 6.499148    | 6.534702    |
| "Myl6b"   | 2.7067976   | 2.8693295   | 2.775627    | 2.8774757   | 2.7737725   | 2.745628    | 2.7681222   | 2.8356338   |
| "Myl9"    | 8.767784    | 8.387466    | 8.674362    | 8.615655    | 8.723097    | 8.328339    | 8.681604    | 8.737       |
| "Mylip"   | 8.728942    | 9.159208    | 8.243815    | 8.692061    | 9.4888      | 9.800885    | 9.005559    | 8.703734    |
| "Mylk"    | 8.282136    | 8.0661255   | 8.2148965   | 8.1445835   | 8.235414    | 8.3536405   | 7.9726515   | 8.1848245   |
| "Mylk2"   | 9.530142    | 10.199558   | 10.145705   | 9.663012    | 10.143681   | 9.619932    | 9.080073    | 9.650488    |
| "Mylpf"   | 15.733647   | 15.763412   | 15.898849   | 15.765295   | 15.774887   | 15.743404   | 15.699798   | 15.7190075  |
| "Mynn"    | 3.76699084  | 4.6819341   | 4.17531418  | 4.32535078  | 4.31573712  | 4.43712134  | 4.01182486  | 4.23668948  |
| "Myo10"   | 5.447930867 | 5.699421    | 5.488075    | 5.4653712   | 5.205166333 | 4.775717633 | 5.637147767 | 5.502658933 |
| "Myo15"   | 2.3883119   | 2.4711318   | 2.4450219   | 2.5192518   | 2.4444516   | 2.3819952   | 2.606723    | 2.4884503   |
| "Myo15b"  | 2.4530706   | 2.5565553   | 2.5020797   | 2.619896    | 2.4909413   | 2.4498389   | 2.4924428   | 2.5604115   |
| "Myo18a"  | 9.395354    | 9.615207    | 8.595104    | 8.672188    | 8.790535    | 8.988124    | 8.677376    | 8.639356    |
| "Myo19"   | 2.03359     | 1.801983    | 2.1425922   | 2.186172    | 2.2168884   | 2.1617136   | 2.8112419   | 2.1916823   |
| "Myo1b"   | 6.403389133 | 5.9151487   | 5.538270433 | 5.141152133 | 5.720978667 | 6.2782271   | 5.499409607 | 5.4992013   |
| "Myo1c"   | 6.282699533 | 6.0790081   | 6.3074033   | 6.170611433 | 6.364992667 | 6.3952348   | 6.62591     | 6.3257408   |
| "Myo1d"   | 5.4574933   | 5.612528    | 5.8024654   | 5.486452    | 5.6539874   | 5.35616     | 5.213519    | 5.9292912   |
| "Myo1e"   | 3.378399267 | 5.503752567 | 2.8388308   | 2.963151967 | 2.857975533 | 4.340271933 | 2.693505733 | 2.836505967 |
| "Myo1g"   | 2.8149056   | 2.8328936   | 2.8433874   | 2.8094208   | 3.2705536   | 5.9153376   | 2.8991225   | 2.7658763   |
| "Myo5a"   | 4.9978825   | 5.84638775  | 4.19694175  | 4.4499985   | 5.6901847   | 5.8406539   | 4.8112712   | 4.2141455   |
| "Myo5b"   | 2.7468266   | 2.461758    | 2.4254272   | 2.5438323   | 2.4223194   | 2.352359    | 2.409976    | 2.4983253   |
| "Myo5c"   | 3.7989705   | 4.651329    | 4.609789    | 5.6691837   | 4.605692    | 3.4262686   | 4.832878    | 4.713094    |
| "Myo6"    | 3.9357835   | 3.6638422   | 3.869809067 | 3.995239267 | 3.921866767 | 3.680891733 | 3.812451433 | 3.989325833 |
| "Myo7a"   | 3.9739616   | 3.798274    | 4.4709206   | 3.8167508   | 4.140045    | 4.628142    | 3.8778965   | 3.659851    |
| "Myo9a"   | 4.0525284   | 3.774943    | 3.4971383   | 3.1118667   | 3.64755     | 3.4247143   | 3.525975    | 3.3865533   |
| "Myo9b"   | 6.017498    | 5.570112    | 5.9043603   | 5.4380507   | 5.76927     | 6.4768867   | 5.9517856   | 5.588061    |
| "Myoc"    | 8.628344    | 7.3934903   | 10.340107   | 9.353901    | 9.131782    | 8.864035    | 9.696419    | 9.350575    |
| "Myocd"   | 2.469869    | 3.3662531   | 2.5088835   | 2.5398903   | 2.532064    | 2.4776628   | 2.46698646  | 2.5233002   |
| "Myod1"   | 1.8224192   | 1.7814406   | 2.2641795   | 3.1572108   | 1.8269478   | 1.8083737   | 3.8690624   | 2.6795783   |
| "Myof"    | 3.1704484   | 2.7614417   | 3.3724407   | 3.0175561   | 3.0839306   | 3.105201    | 3.18441235  | 3.18673075  |
| "Myog"    | 9.664056    | 6.500363    | 5.4068747   | 3.5350156   | 5.726863    | 3.6710043   | 8.263952    | 4.5437593   |
| "Myom1"   | 12.720065   | 13.412433   | 13.107754   | 13.079539   | 13.115185   | 13.0120535  | 12.933035   | 13.090388   |
| "Myom2"   | 12.950969   | 13.129549   | 13.240953   | 13.270567   | 13.270169   | 12.875235   | 13.159825   | 13.123601   |
| "Myot"    | 13.959203   | 14.067461   | 13.914044   | 13.987077   | 14.186624   | 13.817326   | 13.840703   | 14.029684   |
| "Myoz1"   | 10.3969375  | 11.417421   | 11.31509    | 11.6332665  | 11.00976    | 11.0318365  | 10.893985   | 11.4496705  |
| "Myoz2"   | 12.457682   | 10.66935    | 10.8567505  | 11.761214   | 12.12396    | 10.916826   | 12.111817   | 12.1933565  |
| "Mypop"   | 2.4046257   | 2.7248106   | 2.9785206   | 3.2395453   | 2.722888    | 2.3371835   | 3.2473996   | 2.7921705   |
| "Myst2"   | 4.62742435  | 5.0510102   | 4.75942535  | 4.46500805  | 4.99464665  | 5.1698357   | 4.50605365  | 4.56474565  |
| "Myst3"   | 6.3340545   | 7.4454055   | 6.985043    | 6.868465    | 6.8191266   | 7.1884484   | 6.742032    | 6.9954324   |
| "Myst4"   | 7.20318     | 7.412592    | 6.8624344   | 7.226322    | 6.9012814   | 6.7556744   | 6.9195557   | 7.3639736   |
| "Myt1"    | 2.8850098   | 3.0885227   | 2.9515154   | 3.1347067   | 2.9625175   | 2.8593302   | 2.9657607   | 3.0296502   |
| "Myt1l"   | 2.47967805  | 2.55253075  | 2.51154765  | 2.9127364   | 2.519008    | 2.4522817   | 2.50869     | 2.60009265  |
| "Myzap"   | 3.6672304   | 3.6344504   | 3.2484035   | 3.945702    | 3.9680512   | 4.72635     | 3.7391593   | 3.9581373   |
| "Mzt2"    | 8.222457    | 9.52176     | 7.772371    | 7.9197974   | 8.421339    | 8.706541    | 8.098739    | 7.881424    |
| "N4bp1"   | 5.5973773   | 5.9603014   | 5.8844132   | 6.1658435   | 5.6498485   | 6.2334747   | 6.2239676   | 6.1058903   |
| "N4bp2l1" | 7.0077057   | 5.823751    | 5.5238614   | 5.1769886   | 6.3979354   | 7.531528    | 6.4346223   | 6.0520163   |
| "N4bp3"   | 4.6775804   | 4.7405868   | 4.708374    | 4.770592    | 5.147732    | 4.8739963   | 4.691387    | 4.776283    |
| "N6amt2"  | 6.666746625 | 6.729061425 | 7.1018564   | 7.47880725  | 6.751079225 | 6.25622125  | 7.144153325 | 7.32782315  |
| "Naa10"   | 8.455867    | 8.419442    | 8.769497    | 8.636292    | 8.33875     | 8.004391    | 8.740967    | 8.490359    |
| "Naa11"   | 2.4080863   | 2.4867756   | 2.4421108   | 2.54644     | 2.4515278   | 2.40422     | 2.4417524   | 2.532777    |
| "Naa15"   | 8.009756675 | 8.258106275 | 8.64348725  | 8.80282515  | 8.130756    | 8.145071175 | 8.6396346   | 8.6941805   |
| "Naa20"   | 8.025221    | 9.624258    | 9.6814      | 8.903273    | 8.319769    | 9.583664    | 9.72498     | 9.905653    |
| "Naa30"   | 8.376993    | 8.881083    | 9.053059    | 8.967293    | 8.855526    | 9.017849    | 8.7884035   | 8.995017    |
| "Naa35"   | 7.067272833 | 7.165320433 | 7.543561667 | 7.7029953   | 7.158668767 | 7.070597333 | 7.711421833 | 7.7642595   |
| "Naa38"   | 7.7999125   | 8.237877    | 8.039327    | 8.190705    | 8.016409    | 7.8455253   | 8.415592    | 8.240012    |
| "Naa40"   | 4.8911304   | 6.1303754   | 5.364013    | 5.3309064   | 5.801676    | 5.70601     | 5.173128    | 5.13962     |
| "Naaa"    | 4.6025846   | 4.4768537   | 5.56671165  | 4.7559254   | 5.30344015  | 5.1672349   | 5.3491876   | 5.0918245   |
| "Naalad2" | 4.17090565  | 3.75191355  | 4.64232205  | 4.5922057   | 4.11610005  | 3.694914    | 4.22072135  | 4.4270442   |
| "Nab1"    | 6.8493789   | 5.7767403   | 6.0818698   | 6.0061762   | 6.22118385  | 6.19130535  | 6.8622863   | 6.0108085   |
| "Nab2"    | 2.2031674   | 2.2714124   | 2.7207565   | 2.3668196   | 2.3149886   | 2.3056142   | 2.337212    | 2.3860965   |
| "Naca"    | 12.4905815  | 12.725045   | 12.4366725  | 12.2542075  | 12.68991825 | 12.76838425 | 12.4795765  | 12.321518   |
| "Nacc1"   | 3.2034607   | 3.278585733 | 3.267361967 | 3.311969633 | 3.240043867 | 3.1881437   | 3.2340765   | 3.2841239   |
| "Nacc2"   | 4.302239033 | 3.981434767 | 4.764470433 | 4.736986767 | 4.360777333 | 4.115475133 | 4.758317967 | 4.7110673   |
| "Nadk"    | 6.20439985  | 5.28361665  | 5.8745391   | 5.4247386   | 6.10929375  | 6.432892    | 6.396393    | 5.6709068   |
| "Nae1"    | 9.237307    | 9.34568     | 9.641174    | 9.749103    | 9.611401    | 9.534675    | 9.718406    | 9.810633    |
| "Naf1"    | 7.6907086   | 8.078448    | 7.8875985   | 7.8471427   | 7.813338    | 7.5628414   | 7.7494144   | 7.7559004   |
| "Naga"    | 5.637099    | 5.408875    | 5.6226583   | 5.2390604   | 6.341161    | 6.408726    | 5.3729115   | 5.125607    |
| "Nagk"    | 5.918383    | 5.9540105   | 6.6644163   | 5.8369937   | 6.0991282   | 6.537247    | 6.831145    | 6.004409    |

|           |             |             |             |             |             |             |             |             |
|-----------|-------------|-------------|-------------|-------------|-------------|-------------|-------------|-------------|
| "Naglu"   | 3.295687    | 2.746242    | 2.8957138   | 2.8131065   | 3.2997007   | 3.25866     | 2.8938134   | 2.7862961   |
| "Nags"    | 4.7283516   | 2.7627592   | 2.3994007   | 2.4533775   | 2.3974674   | 2.3784976   | 2.3941712   | 2.4372635   |
| "Naip1"   | 2.7961688   | 2.9025202   | 2.8376775   | 2.9686406   | 2.8456855   | 2.7336812   | 2.8257356   | 2.930398    |
| "Naip2"   | 2.834033    | 2.6380303   | 2.6047502   | 2.6901479   | 2.6217182   | 3.7802958   | 2.606655    | 2.7263186   |
| "Naip5"   | 2.2438672   | 2.2505155   | 2.2123      | 2.3062103   | 2.3106184   | 2.3275952   | 2.2191226   | 2.2727342   |
| "Naip6"   | 2.4451103   | 2.5161018   | 2.5648913   | 2.5907657   | 2.4992094   | 2.4473948   | 2.5284057   | 2.555078    |
| "Namp1"   | 6.8903136   | 7.66167725  | 6.62016025  | 7.312608    | 7.2068222   | 7.779198    | 7.2233625   | 7.2382482   |
| "Nanog"   | 2.4814293   | 2.5972595   | 2.5314395   | 2.6612356   | 2.5420492   | 2.4854095   | 2.5271797   | 2.644856    |
| "Nanos1"  | 2.796173    | 3.0139785   | 2.9447505   | 2.98056     | 2.9520931   | 2.9286358   | 2.9035347   | 2.9809906   |
| "Nanp"    | 6.433557    | 5.621662    | 6.979567    | 7.181473    | 6.1603155   | 5.695137    | 7.060361    | 6.9862475   |
| "Nans"    | 4.8859874   | 4.46841845  | 5.59679025  | 4.95798935  | 4.44492265  | 4.5451015   | 5.867363    | 4.85290575  |
| "Nap1l1"  | 8.730464929 | 8.828348643 | 8.805721086 | 8.5598641   | 9.159542786 | 9.495029429 | 8.779885857 | 8.890588686 |
| "Nap1l2"  | 2.4110065   | 2.5272157   | 2.464782    | 2.5935192   | 2.4681427   | 2.4208417   | 2.4629836   | 2.5709505   |
| "Nap1l3"  | 2.6687598   | 2.818569    | 2.8464572   | 2.8651373   | 2.8047037   | 2.6716094   | 2.853692    | 2.8512754   |
| "Nap1l4"  | 10.283484   | 10.705922   | 10.946377   | 10.94237    | 10.58321    | 10.631274   | 10.527953   | 10.869861   |
| "Nap1l5"  | 2.814273    | 3.019659    | 2.8912601   | 3.0698204   | 2.943922    | 2.9438732   | 2.9577973   | 3.0361698   |
| "Napa"    | 8.6618355   | 9.0260355   | 8.5299545   | 8.1166263   | 8.37608265  | 8.6709771   | 8.335829    | 8.1120387   |
| "Napb"    | 6.9684376   | 8.2848362   | 5.1594591   | 5.37009336  | 7.36255988  | 8.59640034  | 5.7014951   | 5.65565708  |
| "Napg"    | 6.129983    | 6.766787    | 6.27309     | 6.4111875   | 6.36862975  | 6.5406471   | 5.9857185   | 6.420306    |
| "Napsa"   | 3.0751116   | 2.4924643   | 2.4177885   | 2.508937    | 2.4834654   | 6.6164145   | 2.4813242   | 2.5024517   |
| "Narf"    | 6.3472555   | 6.416715567 | 7.503520467 | 7.457650333 | 6.840329633 | 6.229469333 | 7.631378167 | 7.58537     |
| "Narfl"   | 7.5835624   | 7.6300144   | 7.3843565   | 7.7295985   | 7.7162037   | 7.2406588   | 7.329645    | 7.352927    |
| "Narg2"   | 5.04158735  | 6.242301    | 5.3941145   | 5.4884103   | 5.65237475  | 5.94482855  | 5.49994395  | 5.5528109   |
| "Nars"    | 9.084924    | 9.5969175   | 9.1803225   | 9.386164    | 9.1683075   | 9.50427     | 8.973058    | 9.3217565   |
| "Nasp"    | 4.68803765  | 5.12387775  | 4.455313    | 4.5583265   | 5.08585085  | 5.1886615   | 4.5962124   | 4.5794256   |
| "Nat15"   | 7.264347    | 6.430881    | 7.6530213   | 7.6285553   | 6.9920316   | 6.9972076   | 7.590587    | 7.538543    |
| "Nat2"    | 3.7423341   | 4.1823525   | 4.560235    | 3.9136407   | 4.6177244   | 5.0493484   | 3.799116    | 4.1991763   |
| "Nat3"    | 2.351847    | 2.4412274   | 2.389555    | 2.5059814   | 2.394897    | 2.350857    | 2.3891163   | 2.4928412   |
| "Nat6"    | 4.9443326   | 4.93924     | 4.829003    | 5.0318837   | 5.096397    | 4.974655    | 4.972023    | 5.108465    |
| "Nat9"    | 6.6846046   | 7.259279    | 6.6653137   | 6.0774546   | 7.0456867   | 6.2715187   | 6.8181353   | 6.2080517   |
| "Nav2"    | 2.5576377   | 2.9024742   | 3.8732102   | 3.0812435   | 2.9188418   | 2.546181    | 3.2095723   | 3.1504567   |
| "Nbea"    | 3.9197521   | 4.61269     | 4.550881    | 4.319656    | 4.8606167   | 4.77621     | 4.814392    | 4.651943    |
| "Nbeal2"  | 2.4444807   | 2.4837425   | 2.473705    | 2.5517836   | 2.4623914   | 2.540973    | 2.4682019   | 2.5268137   |
| "Nbl1"    | 4.0704584   | 3.4197342   | 4.507997    | 4.3294344   | 4.8118916   | 4.418228    | 4.642595    | 4.3199406   |
| "Nbn"     | 7.7145658   | 7.721383    | 7.9676886   | 8.328416    | 7.7167244   | 7.565536    | 7.782449    | 8.314828    |
| "Nbr1"    | 8.7657683   | 9.5053565   | 7.9689465   | 8.0316753   | 8.744241    | 9.31748735  | 7.8609132   | 7.96363765  |
| "Ncald"   | 3.76171505  | 3.67720935  | 4.1659138   | 3.9128994   | 3.83403245  | 3.0484857   | 3.765137    | 3.8110225   |
| "Ncam1"   | 4.439624233 | 3.320924533 | 3.415185233 | 3.398986133 | 3.238365367 | 2.934281533 | 3.880411067 | 3.536301333 |
| "Ncam2"   | 2.3991718   | 2.460608    | 2.431184    | 2.5314286   | 2.4317038   | 2.393371    | 2.4303005   | 2.5048265   |
| "Ncan"    | 2.6707852   | 2.7485926   | 2.7039146   | 2.8060668   | 2.7070322   | 2.6679664   | 2.7021306   | 2.7667108   |
| "Ncapd2"  | 2.6764455   | 2.369009    | 2.7918231   | 2.7767692   | 3.3916726   | 2.5932865   | 2.844673    | 2.8803961   |
| "Ncapg"   | 2.44961525  | 2.56616585  | 2.49961375  | 2.616744    | 2.5088848   | 2.4820559   | 2.5058142   | 2.59853485  |
| "Ncapg2"  | 3.8223429   | 3.5949914   | 3.9679215   | 3.2206967   | 3.569083    | 5.248983    | 4.188078    | 4.4421387   |
| "Ncaph"   | 1.7943808   | 2.54151915  | 2.38816225  | 2.40894785  | 2.3488971   | 2.3225194   | 2.3308336   | 2.5108781   |
| "Ncaph2"  | 6.129571367 | 6.3904718   | 6.190777667 | 6.271316633 | 6.1579345   | 6.0440381   | 6.307641467 | 6.155610433 |
| "Ncbp1"   | 6.3076854   | 6.1738124   | 6.475629    | 6.2765703   | 6.230403    | 6.756881    | 6.6349144   | 6.3572974   |
| "Ncbp2"   | 6.314527367 | 6.6461651   | 6.792947167 | 6.604736767 | 6.634866567 | 6.832749233 | 6.972967433 | 6.760590967 |
| "Ncdn"    | 3.8332481   | 4.4049773   | 3.7779067   | 3.9071407   | 3.778522    | 3.826809    | 3.7430565   | 3.8767843   |
| "Ncf1"    | 2.7488561   | 2.927557    | 2.83723235  | 2.9923131   | 2.85609185  | 3.3490281   | 2.91661075  | 2.97048545  |
| "Ncf2"    | 5.3596473   | 4.2972164   | 5.082373    | 4.3303304   | 5.594899    | 5.8945975   | 5.267216    | 4.172096    |
| "Ncf4"    | 3.85815     | 2.441025    | 2.4935012   | 2.1673265   | 2.4075866   | 5.0353017   | 3.4129791   | 2.537963    |
| "Nck1"    | 4.9388129   | 4.92401265  | 5.2282318   | 5.3066294   | 5.59967485  | 5.67117095  | 5.3421655   | 5.4063462   |
| "Nck2"    | 4.37141935  | 4.45580125  | 4.90453675  | 4.8369594   | 4.3597094   | 4.54123405  | 4.63454815  | 4.67157635  |
| "Nckap1"  | 10.521217   | 10.614251   | 10.4891815  | 10.42829    | 10.563414   | 11.117243   | 10.703591   | 10.430809   |
| "Nckap1l" | 3.6149601   | 2.4596293   | 2.87422845  | 2.67639095  | 2.9780487   | 4.0303168   | 3.5149453   | 2.6978935   |
| "Nckipsd" | 2.2925928   | 2.3343406   | 2.3513608   | 2.3726106   | 2.320049    | 2.2961142   | 2.8727698   | 2.3643136   |
| "Ncl"     | 8.5030974   | 8.924111575 | 8.344299525 | 8.618722725 | 8.5254791   | 8.759012    | 8.43752665  | 8.699650875 |
| "Ncln"    | 4.427539    | 5.2972374   | 4.6159363   | 3.945715    | 4.4938707   | 4.670046    | 3.9906769   | 4.2741637   |
| "Ncoa1"   | 7.70993485  | 8.3327205   | 8.05988185  | 8.1919615   | 8.1116725   | 8.135678    | 8.116219    | 7.90567435  |
| "Ncoa3"   | 3.337089    | 2.8099284   | 3.0794308   | 3.0122771   | 3.3446186   | 3.7110887   | 3.3279915   | 2.9403622   |
| "Ncoa4"   | 7.7587128   | 6.46745635  | 6.9031572   | 6.810469    | 7.0248765   | 7.78938225  | 7.1096275   | 7.107728    |
| "Ncoa5"   | 2.8126967   | 3.093627    | 2.7548354   | 2.6462464   | 2.7365534   | 3.1215782   | 2.7510257   | 2.8048513   |
| "Ncoa6"   | 7.3128376   | 7.194724    | 7.495824    | 7.588347    | 7.7904053   | 7.5771546   | 7.5107894   | 8.155738    |
| "Ncor1"   | 9.35761     | 9.72594     | 9.470595333 | 9.537341333 | 9.749041667 | 9.668708667 | 9.614309333 | 9.570430333 |
| "Ncor2"   | 4.6603031   | 4.75799975  | 4.81286765  | 4.67842725  | 4.6848145   | 4.53471185  | 4.91446835  | 4.6619727   |
| "Ncstn"   | 2.6676164   | 2.6930583   | 2.6763802   | 2.7112842   | 2.674965    | 2.6697717   | 2.6677766   | 2.7108183   |
| "ND5"     | 14.28949    | 14.365377   | 14.329542   | 14.630099   | 14.322527   | 14.310034   | 14.143624   | 14.698329   |
| "Ndc80"   | 2.3802638   | 2.4648283   | 2.4352138   | 2.5272784   | 2.4479926   | 2.3949857   | 2.4352033   | 2.5141337   |
| "Nde1"    | 6.566063    | 7.337637    | 6.871208    | 7.368995    | 6.6917186   | 7.0540514   | 7.495874    | 7.3867793   |
| "Ndel1"   | 7.971458    | 8.10364535  | 8.09470135  | 8.1792388   | 8.20057635  | 8.44983625  | 8.26902     | 8.15708385  |
| "Ndfip1"  | 10.19638583 | 10.02808367 | 10.15554083 | 10.195351   | 10.05711    | 10.17195967 | 9.931912667 | 10.13451933 |
| "Ndfip2"  | 7.46741     | 7.1759415   | 7.421385    | 7.205351    | 7.327211    | 7.3939953   | 7.516659    | 7.4398503   |
| "Ndn"     | 6.97592662  | 5.65168958  | 8.4932997   | 7.9877532   | 7.45577954  | 6.47047342  | 8.09276666  | 7.83626568  |
| "Ndnl2"   | 7.7371244   | 8.136629    | 6.7617965   | 7.219278    | 7.55004     | 7.5564547   | 6.888278    | 7.040258    |
| "Ndp"     | 2.4598637   | 2.5463417   | 2.4766731   | 2.5576217   | 2.4795752   | 2.453353    | 2.4759233   | 2.545579    |
| "Ndrgr1"  | 7.499318    | 7.33956355  | 7.29490725  | 7.07700025  | 7.888882375 | 7.64479575  | 7.6116731   | 7.3515919   |
| "Ndrgr2"  | 13.23397    | 13.436661   | 13.263612   | 13.375721   | 13.365632   | 13.099732   | 13.180024   | 13.421684   |
| "Ndrgr3"  | 5.8922      | 6.2105575   | 6.5322252   | 6.476347    | 6.53201065  | 6.050019    | 6.5318848   | 6.406474    |
| "Ndrgr4"  | 5.2663228   | 2.9230343   | 6.08665525  | 5.379845    | 6.2124305   | 3.4047503   | 5.88224555  | 5.13709045  |
| "Ndst1"   | 7.70863575  | 7.13096455  | 8.0330475   | 8.208624    | 7.8936795   | 7.2643002   | 7.7937608   | 8.0566635   |
| "Ndst2"   | 4.4108667   | 4.4116364   | 4.3063507   | 4.4505877   | 4.8087587   | 4.347574    | 4.431775    | 4.2882223   |

|            |             |             |             |             |             |             |             |             |
|------------|-------------|-------------|-------------|-------------|-------------|-------------|-------------|-------------|
| "Ndufa1"   | 13.090132   | 13.217541   | 13.623165   | 13.590753   | 13.475117   | 13.350711   | 13.368685   | 13.575799   |
| "Ndufa10"  | 8.758892    | 8.806263    | 9.0639833   | 9.35835625  | 9.0839552   | 9.093835    | 8.6139565   | 9.3778642   |
| "Ndufa12"  | 11.0765005  | 11.12465725 | 11.268982   | 11.27651693 | 11.01504825 | 10.885807   | 10.89568245 | 11.23840125 |
| "Ndufa13"  | 13.036154   | 13.075995   | 13.562875   | 13.493338   | 13.27208    | 13.033638   | 13.207206   | 13.461867   |
| "Ndufa2"   | 12.939195   | 13.013525   | 13.061471   | 13.084682   | 12.980618   | 12.810839   | 13.278536   | 12.989199   |
| "Ndufa3"   | 13.4228825  | 13.52643075 | 13.64143425 | 13.5866235  | 13.5395435  | 13.3713845  | 13.5408505  | 13.568041   |
| "Ndufa4"   | 13.19819    | 13.422692   | 13.494799   | 13.537467   | 13.437088   | 13.260087   | 13.277062   | 13.478304   |
| "Ndufa5"   | 12.3018095  | 12.446994   | 12.6178875  | 12.7961205  | 12.5970585  | 12.1303295  | 12.570295   | 12.669206   |
| "Ndufa6"   | 12.349266   | 12.346721   | 12.381861   | 12.578968   | 12.367012   | 12.166047   | 12.609873   | 12.497652   |
| "Ndufa7"   | 11.6190248  | 11.833813   | 11.7115378  | 11.688282   | 11.6152729  | 11.381958   | 11.8779813  | 11.6197548  |
| "Ndufa8"   | 11.628737   | 11.518619   | 12.142244   | 12.202873   | 12.078951   | 11.576714   | 12.010903   | 12.111299   |
| "Ndufa9"   | 12.12828    | 12.269016   | 12.515144   | 12.695985   | 12.638767   | 12.317498   | 12.233135   | 12.777868   |
| "Ndufab1"  | 8.934845    | 9.149906275 | 9.621065675 | 9.9773035   | 9.706457775 | 9.2378845   | 9.590951175 | 9.989925175 |
| "Ndufaf1"  | 9.111325    | 8.903707    | 9.25176     | 9.760282    | 9.354091    | 8.750615    | 8.974022    | 9.694863    |
| "Ndufaf3"  | 7.5547266   | 7.3272567   | 8.232651    | 8.099684    | 7.796887    | 7.4162436   | 8.548047    | 7.8929076   |
| "Ndufaf4"  | 8.81439275  | 8.983721    | 9.2113905   | 9.6139465   | 8.877191    | 8.53237535  | 9.1786715   | 9.487435    |
| "Ndufb10"  | 12.842135   | 12.7495985  | 13.143323   | 13.416288   | 13.051204   | 12.41442    | 13.254858   | 13.424953   |
| "Ndufb11"  | 12.75487667 | 12.83945767 | 13.069017   | 13.084942   | 12.91023333 | 12.8148775  | 12.89757167 | 13.001378   |
| "Ndufb2"   | 12.04027575 | 12.153205   | 12.5832295  | 12.6146495  | 12.3633345  | 12.036972   | 12.190335   | 12.552664   |
| "Ndufb3"   | 12.414926   | 12.178348   | 12.554738   | 12.744788   | 12.6759205  | 12.083722   | 12.623239   | 12.743157   |
| "Ndufb5"   | 13.1874755  | 13.144046   | 13.489972   | 13.815115   | 13.4244025  | 13.093333   | 13.3280545  | 13.801324   |
| "Ndufb6"   | 11.8517005  | 12.06561    | 12.363211   | 12.66567875 | 12.148692   | 11.738491   | 12.1909345  | 12.590097   |
| "Ndufb7"   | 11.6795335  | 11.541526   | 12.0780155  | 12.0261535  | 11.855261   | 11.3364305  | 11.9829145  | 11.93862375 |
| "Ndufb8"   | 12.645413   | 12.867856   | 13.284184   | 13.394119   | 13.070841   | 12.691893   | 12.890236   | 13.277346   |
| "Ndufb9"   | 9.836725333 | 9.848712467 | 10.04722533 | 10.13239907 | 9.9929972   | 9.795047433 | 10.01395877 | 10.06027967 |
| "Ndufc1"   | 12.5091465  | 12.6388925  | 13.09626    | 13.162613   | 12.8043125  | 12.672018   | 12.7560275  | 13.079131   |
| "Ndufs1"   | 12.078931   | 12.040709   | 12.493335   | 12.6363     | 12.611211   | 12.183617   | 12.025243   | 12.711465   |
| "Ndufs2"   | 12.616114   | 13.002423   | 12.561288   | 12.785724   | 12.964698   | 13.020465   | 12.49171    | 12.751252   |
| "Ndufs3"   | 12.42784    | 12.759357   | 12.8596735  | 12.935748   | 12.785828   | 12.480781   | 12.748129   | 12.858405   |
| "Ndufs4"   | 8.9861585   | 9.604239333 | 9.409214667 | 9.816368    | 9.463543333 | 9.323901833 | 9.048227833 | 9.762691667 |
| "Ndufs7"   | 12.4213545  | 12.7585405  | 12.8705515  | 12.899864   | 12.924662   | 12.4363315  | 12.6815245  | 12.7678355  |
| "Ndufs8"   | 11.6130346  | 11.5018966  | 12.114814   | 12.1434367  | 11.9864787  | 11.4370492  | 11.7155362  | 12.0734938  |
| "Ndufv1"   | 11.964292   | 11.93267367 | 12.110671   | 12.28783533 | 12.22934033 | 11.93603667 | 11.958808   | 12.206835   |
| "Ndufv2"   | 12.63477833 | 12.80190867 | 13.05485433 | 13.14934467 | 13.024491   | 12.594475   | 12.83663367 | 13.02746333 |
| "Ndufv3"   | 12.340273   | 12.4503975  | 12.895454   | 12.952697   | 12.615433   | 12.286365   | 12.625411   | 12.841096   |
| "Neat1"    | 12.914841   | 13.718153   | 13.053107   | 13.104512   | 13.284626   | 13.753437   | 13.199175   | 13.136902   |
| "Nebi"     | 2.3636754   | 2.478852    | 2.3991945   | 2.5066686   | 2.4018571   | 2.361761    | 2.3977876   | 2.4945126   |
| "Necap1"   | 5.551711    | 5.583518    | 5.1068068   | 5.5921307   | 5.7183986   | 6.1158013   | 5.634343    | 5.6684113   |
| "Necap2"   | 4.0830008   | 4.0614547   | 4.536938    | 4.0837274   | 4.22164395  | 4.4579515   | 4.52145675  | 4.25741015  |
| "Nedd1"    | 5.13607955  | 4.8633301   | 5.21037575  | 5.55536315  | 5.1395895   | 5.00916385  | 5.1978347   | 5.78841585  |
| "Nedd4"    | 10.196983   | 10.36489633 | 10.31577033 | 10.14479367 | 10.709604   | 10.43557567 | 10.55530783 | 10.26699467 |
| "Nedd41"   | 5.55787025  | 5.83526985  | 4.8775673   | 4.78570285  | 5.3742041   | 5.6464161   | 4.8628685   | 4.6549612   |
| "Nedd8"    | 11.0645485  | 11.038038   | 10.991186   | 11.072803   | 10.907864   | 10.721304   | 11.179274   | 11.026262   |
| "Nedd9"    | 4.557778167 | 3.908272833 | 4.5293483   | 4.4597487   | 4.5162345   | 4.747492967 | 4.448150133 | 4.548231767 |
| "Nefh"     | 2.782032    | 2.96058     | 2.8660538   | 2.9427123   | 2.8778613   | 2.8251946   | 2.86495     | 2.9695213   |
| "Nefm"     | 2.290243    | 2.4188719   | 2.360819    | 2.4822168   | 2.3763936   | 2.314152    | 2.3584063   | 2.4699047   |
| "Neil3"    | 3.2897081   | 3.3593462   | 3.8880987   | 3.4193738   | 3.3137424   | 3.1093807   | 3.8107464   | 3.3879457   |
| "Nek1"     | 2.8102686   | 2.8851655   | 2.833923    | 2.9559755   | 2.834967    | 2.798264    | 2.8090117   | 2.9144936   |
| "Nek2"     | 2.5675292   | 2.684981    | 2.6432524   | 2.7535288   | 2.6472445   | 2.5909824   | 2.6366446   | 2.7362957   |
| "Nek3"     | 5.458654    | 5.915276    | 5.8466554   | 5.662392    | 5.4650836   | 5.1384106   | 6.2603307   | 6.0599756   |
| "Nek4"     | 2.5911312   | 2.4938953   | 2.590722    | 2.6355524   | 2.4851055   | 2.4588227   | 2.9970496   | 2.67957     |
| "Nek6"     | 5.0665297   | 5.686513    | 5.1977353   | 5.9106148   | 4.39887395  | 4.66759475  | 4.9418493   | 4.6310907   |
| "Nek7"     | 11.163812   | 12.1226175  | 11.5123565  | 11.6950365  | 11.313521   | 11.7994705  | 11.336362   | 11.691951   |
| "Nek8"     | 2.6682367   | 2.6831021   | 2.6294558   | 2.718781    | 2.6452117   | 2.583733    | 2.6422248   | 2.735037    |
| "Nek9"     | 11.152562   | 11.659468   | 11.306147   | 11.558573   | 11.078467   | 11.747374   | 11.299426   | 11.370771   |
| "Nelf"     | 6.515067    | 6.3220074   | 6.5632865   | 6.3203535   | 6.697274    | 6.45929075  | 6.50264725  | 6.5856984   |
| "Nell2"    | 2.6615267   | 2.6824296   | 2.6714118   | 2.7264917   | 2.6711986   | 2.6560946   | 2.6702893   | 2.7284007   |
| "Nemf"     | 2.4268425   | 2.5313504   | 2.5149908   | 2.5946083   | 2.515346    | 2.458705    | 2.4926875   | 2.602141    |
| "Nenf"     | 8.564216    | 8.69825     | 9.128487    | 9.365634    | 8.472108    | 8.183307    | 9.376506    | 9.080805    |
| "Neo1"     | 6.0583262   | 6.6855545   | 7.3998203   | 7.107609    | 6.594876    | 5.9785695   | 6.685441    | 7.1077747   |
| "Nes"      | 6.1760678   | 5.06695875  | 5.7407448   | 5.7275723   | 5.0093573   | 4.5677658   | 6.20008635  | 5.91378905  |
| "Net1"     | 8.575553    | 9.7627535   | 8.132459    | 7.376573    | 9.330983    | 9.921376    | 8.083312    | 7.817763    |
| "Neto1"    | 2.6246922   | 2.6937215   | 2.6548505   | 2.703181    | 2.6629817   | 2.6213067   | 2.6498044   | 2.7241118   |
| "Neu1"     | 3.672661633 | 3.7904027   | 3.292861333 | 3.438726267 | 3.622161633 | 3.666197867 | 3.3809558   | 3.446197733 |
| "Neu2"     | 5.7880464   | 5.0713406   | 7.666253    | 6.5713677   | 6.635355    | 4.5736876   | 6.780651    | 6.483025    |
| "Neu3"     | 3.1408143   | 3.2813451   | 3.2747223   | 3.5004113   | 3.2943816   | 3.2232888   | 3.2635517   | 3.3460739   |
| "Neurl1a"  | 6.02945     | 5.882888    | 6.1903205   | 6.5722155   | 5.5960333   | 5.3096828   | 6.169699    | 5.9642577   |
| "Neurl4"   | 6.2653203   | 6.1070414   | 5.5437746   | 5.922804    | 5.9908204   | 6.3801837   | 6.2056656   | 6.0308104   |
| "Neurod1"  | 2.5424123   | 2.6704452   | 2.598052    | 2.7180128   | 2.6077442   | 2.552109    | 2.5962749   | 2.7201104   |
| "Neurod4"  | 2.98553825  | 3.2731868   | 3.11427745  | 3.2887169   | 3.11551175  | 3.01801215  | 3.10124915  | 3.234856    |
| "Neurod6"  | 2.638072    | 2.8418927   | 2.6985326   | 2.8595295   | 2.7158895   | 2.6463635   | 2.696629    | 2.833747    |
| "Neurog1"  | 2.329318    | 2.4225407   | 2.3618383   | 2.4748216   | 2.3696666   | 2.3277524   | 2.3617818   | 2.463138    |
| "Nf1"      | 2.7087002   | 2.835104    | 2.756928    | 2.8316221   | 2.7239237   | 2.7059562   | 2.6258695   | 3.1612053   |
| "Nf2"      | 4.06514475  | 4.3827014   | 4.383429    | 4.64604945  | 4.261855375 | 4.2097137   | 4.3628869   | 4.6648379   |
| "Nfam1"    | 2.3896527   | 2.4703813   | 2.4166727   | 2.4992783   | 2.419971    | 2.3959415   | 2.4176197   | 2.494627    |
| "Nfat5"    | 4.1817833   | 4.045826233 | 3.70492167  | 3.767404833 | 3.912979167 | 3.934534433 | 3.750189133 | 3.788867833 |
| "Nfatc1"   | 3.29254915  | 3.81074205  | 3.2058998   | 3.26440785  | 3.46550785  | 3.35806905  | 3.2997063   | 3.10209225  |
| "Nfatc2"   | 2.71575535  | 2.7548266   | 2.73019675  | 2.76130685  | 2.7357708   | 2.7195811   | 2.76019665  | 2.79759     |
| "Nfatc2ip" | 6.022919    | 7.121426    | 6.076579    | 6.0795484   | 6.4924707   | 7.1335773   | 5.832329    | 6.050456    |
| "Nfatc3"   | 7.14156325  | 7.4656129   | 7.7442412   | 7.87139075  | 7.6227012   | 7.878228    | 7.854416    | 7.7441225   |
| "Nfatc4"   | 3.59820945  | 3.6121452   | 3.7608861   | 3.7775959   | 3.69236495  | 3.68891015  | 3.54752065  | 3.80995285  |

|             |             |             |             |             |             |             |             |             |
|-------------|-------------|-------------|-------------|-------------|-------------|-------------|-------------|-------------|
| "Nfe2l1"    | 10.64036    | 10.85584    | 10.210205   | 10.195412   | 10.683921   | 10.583719   | 10.304468   | 10.235521   |
| "Nfe2l2"    | 10.722203   | 10.353744   | 9.514714    | 9.646691    | 10.477144   | 10.611839   | 9.438772    | 9.690335    |
| "Nfe2l3"    | 2.5000298   | 2.592857033 | 2.541542467 | 2.6396137   | 2.5526182   | 2.509886433 | 2.542519633 | 2.634270067 |
| "Nfia"      | 4.245901633 | 4.694976433 | 4.5218365   | 4.513842267 | 4.529731033 | 4.585695133 | 4.3977225   | 4.465137533 |
| "Nfib"      | 6.341724575 | 6.7739462   | 7.5840527   | 7.6557919   | 7.044697675 | 6.665177575 | 7.3297545   | 7.717099325 |
| "Nfic"      | 5.226642025 | 5.2194495   | 5.936916075 | 6.062903875 | 5.5324735   | 4.899173175 | 5.803552275 | 5.743672075 |
| "Nfil3"     | 11.2712345  | 10.24487    | 6.5446324   | 6.004168    | 8.143019    | 9.518965    | 7.1216507   | 6.3560495   |
| "Nfix"      | 7.3398559   | 7.8438975   | 8.00563602  | 8.04519842  | 7.64562532  | 7.36056014  | 7.84476354  | 8.08717704  |
| "Nfkb1"     | 6.289413    | 6.3246894   | 6.166045    | 6.3194914   | 6.290216    | 6.927685    | 6.40696     | 6.322393    |
| "Nfkb2"     | 5.642688    | 5.215924    | 5.216486    | 4.6479373   | 5.0962588   | 5.0541675   | 5.901584    | 4.7866125   |
| "Nfkbia"    | 10.61449325 | 9.815042675 | 8.362527    | 8.564266    | 9.918631    | 10.35336825 | 8.98821175  | 8.810573875 |
| "Nfkbib"    | 6.975324    | 7.1614423   | 6.897091    | 6.6571617   | 6.8923235   | 6.864302    | 7.1013603   | 6.4998903   |
| "Nfkbie"    | 2.4948583   | 2.609267    | 2.5467184   | 2.6162753   | 2.5533762   | 2.711556    | 2.5634604   | 2.588068    |
| "Nfkbil1"   | 5.199844    | 5.752772    | 4.8723493   | 5.0261555   | 5.3300605   | 5.318949    | 5.058173    | 5.2124867   |
| "Nfkbiz"    | 6.7136966   | 4.5854855   | 4.64584265  | 4.8346052   | 5.02859545  | 5.6532683   | 5.63976375  | 4.6266627   |
| "Nfs1"      | 7.3993305   | 7.56186175  | 7.60418     | 7.855589    | 7.542375    | 7.2868385   | 7.230356    | 8.00169435  |
| "Nfu1"      | 9.443147    | 9.8695855   | 9.9293865   | 10.097151   | 9.6407825   | 9.432745    | 9.9660155   | 9.9483095   |
| "Nfx1"      | 4.8612303   | 5.083319733 | 4.710820333 | 4.8742438   | 4.886549633 | 5.077234067 | 4.8945555   | 4.864937233 |
| "Nfxl1"     | 6.7494445   | 6.331862    | 6.4764214   | 6.3766804   | 6.5998664   | 7.2179604   | 6.5507426   | 6.829119    |
| "Nfy1"      | 2.7749815   | 2.840406    | 2.833237    | 2.8799043   | 2.8371725   | 2.8217778   | 3.0164719   | 2.8803775   |
| "Nfyb"      | 6.988747    | 7.75427965  | 7.76066225  | 7.90199715  | 7.2795785   | 7.17937735  | 7.32527965  | 7.46233225  |
| "Nfyc"      | 8.5960455   | 9.335715    | 9.114714    | 8.919515    | 8.678241    | 8.8447485   | 8.663211    | 8.993081    |
| "Ng23"      | 2.3207011   | 2.4640427   | 2.3850536   | 2.49234     | 2.3717785   | 2.3433862   | 2.3833065   | 2.4665122   |
| "Ngdn"      | 8.6648735   | 8.795781    | 8.10339175  | 8.3009005   | 8.5460739   | 8.926585    | 8.5350625   | 8.26552125  |
| "Ngef"      | 3.0524936   | 2.350951    | 2.3279672   | 2.4006453   | 2.3282268   | 2.2785902   | 2.305059    | 2.3900502   |
| "Ngef"      | 2.3806195   | 2.449932    | 2.4049768   | 2.5061593   | 2.4147453   | 2.3722878   | 2.4133062   | 2.4919257   |
| "Ngfr"      | 3.0638645   | 3.4083452   | 3.4340444   | 3.3211856   | 3.2449305   | 3.1116474   | 3.300943    | 3.3748224   |
| "Ngfrap1"   | 5.835355    | 5.503667    | 6.273524    | 5.6653585   | 5.64166     | 5.903       | 6.051697    | 5.7681837   |
| "Ngly1"     | 9.655421    | 10.188063   | 9.997127    | 10.062224   | 9.883568    | 10.228181   | 10.140535   | 9.942772    |
| "Ngp"       | 3.953581    | 2.1652493   | 1.9951967   | 2.1002626   | 1.996304    | 7.7582226   | 2.0277994   | 2.2975185   |
| "Ngrn"      | 8.220905    | 8.792483    | 7.9284234   | 8.160025    | 8.434053    | 8.431575    | 8.225076    | 8.314797    |
| "Nhedc1"    | 2.89521335  | 3.08053445  | 2.95320335  | 3.1495663   | 2.958597    | 2.87525465  | 2.9482299   | 3.04413015  |
| "Nhedc2"    | 2.3543508   | 2.4348438   | 2.3732607   | 2.4809535   | 2.549572    | 2.3295326   | 2.3677015   | 2.4671166   |
| "Nhp2"      | 9.0442705   | 9.4218045   | 8.911938    | 9.1110635   | 8.6150015   | 8.907718    | 9.130689    | 8.87941     |
| "Nhsl1"     | 5.196032    | 4.722695    | 6.078104    | 5.3543043   | 4.9299383   | 5.1517663   | 4.6642647   | 5.6152716   |
| "Nhsl2"     | 3.468611    | 3.851947    | 3.6671124   | 3.2051687   | 3.942126    | 3.6545296   | 3.6850345   | 3.7343612   |
| "Niacr1"    | 2.126547    | 2.1172845   | 2.1358414   | 2.1898189   | 2.133923    | 2.124684    | 2.710568    | 2.292649    |
| "Nlcn1"     | 5.57605625  | 5.00422135  | 5.63314505  | 5.6192718   | 5.3085976   | 4.63936445  | 5.5558972   | 5.6111573   |
| "Nid1"      | 8.67915825  | 7.4671066   | 9.3351665   | 8.46609265  | 9.851451    | 9.1919795   | 8.7538857   | 8.88203275  |
| "Nid2"      | 3.5283809   | 3.8715875   | 5.1734867   | 4.7386603   | 4.665751    | 3.7623923   | 4.9911246   | 4.963194    |
| "Nif31"     | 6.2427473   | 6.582926    | 6.2535067   | 6.413803    | 6.1422896   | 6.114903    | 6.3143697   | 6.3745666   |
| "Nin"       | 6.184867    | 6.7251997   | 6.849455    | 7.0212975   | 6.2657175   | 6.0631137   | 6.5250897   | 6.772972    |
| "Ninj1"     | 7.835755    | 6.82612175  | 6.525902    | 6.240226    | 7.0757025   | 7.5724287   | 7.31745425  | 6.276546    |
| "Nip7"      | 5.7528743   | 6.0442125   | 5.68152     | 5.6814003   | 5.5599839   | 5.89100325  | 5.92762225  | 5.5469323   |
| "Nipa2"     | 7.51542855  | 7.98251325  | 8.09533415  | 8.3664635   | 7.7700705   | 7.6208125   | 7.93494965  | 8.3821165   |
| "Nipal2"    | 2.3312714   | 2.4328184   | 2.4973495   | 2.501974    | 2.3758588   | 2.3324249   | 2.4087505   | 2.4860497   |
| "Nipbl"     | 6.633607    | 7.5536976   | 6.58089     | 6.6591315   | 7.056371    | 7.3380475   | 6.4669534   | 6.7095814   |
| "Nipsnap1"  | 6.47704885  | 2.40156555  | 2.5157558   | 2.42998075  | 2.4323782   | 2.34257615  | 2.36675355  | 2.4296583   |
| "Nipsnap3b" | 6.7019734   | 4.0496635   | 5.511402    | 4.529878    | 5.1022444   | 5.459366    | 5.9807825   | 4.895733    |
| "Nisch"     | 6.544580175 | 6.434107725 | 6.57366     | 6.2764932   | 6.83717095  | 7.038659725 | 6.519202825 | 6.47717545  |
| "Nit1"      | 6.16221595  | 6.0248047   | 5.4091437   | 5.40367115  | 5.506896    | 5.58225235  | 5.33037565  | 5.3771878   |
| "Nit2"      | 8.178691    | 7.6278005   | 8.186667    | 8.055563    | 8.079525    | 7.655432    | 8.039137    | 8.102318    |
| "Nkain1"    | 4.936969333 | 5.118052133 | 5.907447433 | 5.703968267 | 4.523442833 | 4.674886667 | 5.761440667 | 6.1513328   |
| "Nkap"      | 3.14834905  | 3.33653405  | 3.1868218   | 3.3322855   | 3.19712715  | 3.1410631   | 3.2026733   | 3.2914668   |
| "Nkapl"     | 2.4564085   | 2.589624    | 2.5698056   | 2.7067175   | 2.595808    | 2.4588828   | 2.543755    | 2.6783452   |
| "Nkd1"      | 2.9846568   | 3.1035285   | 2.9620361   | 3.134239    | 3.020485    | 2.9714847   | 3.0197043   | 3.1199162   |
| "Nkd2"      | 2.414558    | 2.4535007   | 2.4292862   | 2.5109682   | 2.4287965   | 2.3850312   | 2.4193077   | 2.497593    |
| "Nkg7"      | 2.1080964   | 2.1362052   | 2.1248422   | 2.1896005   | 2.1236887   | 3.1536493   | 2.1444426   | 2.180562    |
| "Nkiras1"   | 8.666267    | 9.173871    | 9.536567    | 9.926562    | 9.317552    | 8.840298    | 9.5261965   | 9.697456    |
| "Nkiras2"   | 6.7333355   | 7.224084    | 6.6937237   | 6.654847    | 6.855549    | 6.8312087   | 6.483993    | 6.564575    |
| "Nktr"      | 7.6906953   | 7.8575915   | 7.451346    | 7.58703415  | 7.6789167   | 7.738082    | 7.24283075  | 7.5287425   |
| "Nkx2-3"    | 2.689665733 | 2.813858333 | 2.783031033 | 2.865140367 | 2.7704505   | 2.721986833 | 2.761781633 | 2.816560333 |
| "Nkx6-1"    | 2.754317    | 2.8002      | 2.740227    | 2.8072891   | 2.7422636   | 2.754717    | 2.7346158   | 2.8055098   |
| "Nkx6-2"    | 2.4711156   | 2.535981    | 2.5268981   | 2.5940056   | 2.523915    | 2.5071099   | 2.5232103   | 2.5815418   |
| "Nle1"      | 2.6361566   | 3.0934355   | 2.6619594   | 2.7411728   | 2.6793647   | 2.6507833   | 2.6735044   | 2.7427971   |
| "Nlgn2"     | 2.3248224   | 2.3533175   | 2.3515077   | 2.3859823   | 2.3518815   | 2.3157873   | 2.3830597   | 2.3495083   |
| "Nlk"       | 6.3992315   | 6.63230465  | 7.70012075  | 7.73302265  | 7.044889    | 7.36391785  | 7.61323715  | 7.534535    |
| "Nln"       | 5.9654      | 5.30088185  | 4.674365    | 4.8033448   | 5.03542825  | 5.02319405  | 5.03961205  | 4.78218725  |
| "Nlrp4c"    | 2.5161648   | 2.774042    | 2.613382    | 2.6945186   | 2.637451    | 2.533271    | 2.6120071   | 2.69137     |
| "Nlrp5"     | 2.6647747   | 2.7292519   | 2.7014887   | 2.8102508   | 2.710169    | 2.6961763   | 2.7093627   | 2.7618227   |
| "Nlrp6"     | 3.7524357   | 2.2634218   | 2.235034    | 2.2845836   | 2.2351847   | 2.2084498   | 2.233555    | 2.3048844   |
| "Nlrx1"     | 5.9093294   | 6.473812    | 6.5101943   | 6.723269    | 6.5127134   | 5.523084    | 6.507692    | 6.517674    |
| "Nmb"       | 4.5777154   | 4.593586    | 4.72496     | 4.838473    | 6.2685537   | 5.472193    | 4.745507    | 4.635511    |
| "Nmd3"      | 8.481884    | 9.145846    | 7.8653415   | 8.476565    | 8.565345    | 9.18254     | 8.301076    | 8.319381    |
| "Nme1"      | 9.3677035   | 8.981826    | 9.262421    | 9.5814225   | 9.1395895   | 9.0559295   | 9.430604    | 9.313858    |
| "Nme2"      | 13.708155   | 13.629741   | 13.76387    | 13.856213   | 13.49745    | 13.523355   | 14.012755   | 13.82458    |
| "Nme5"      | 2.856336    | 3.0013804   | 2.9730506   | 3.073368    | 2.9933825   | 2.9571881   | 2.9009562   | 2.988546    |
| "Nme6"      | 7.625255    | 7.821086    | 8.004928    | 7.736706    | 7.295762    | 6.9958816   | 8.075592    | 7.7576194   |
| "Nme7"      | 3.1953096   | 2.8731818   | 2.997205    | 3.0467603   | 3.0849388   | 2.7838259   | 2.969973    | 3.047454    |
| "Nmi"       | 6.8918724   | 6.645082    | 7.0210004   | 7.105175    | 7.24457     | 7.309061    | 7.378173    | 7.1418486   |
| "Nmnat1"    | 6.19183755  | 5.89198235  | 6.6389178   | 7.1410136   | 6.34514665  | 5.72966535  | 6.6828523   | 7.0238693   |

|           |             |             |             |             |             |             |             |             |
|-----------|-------------|-------------|-------------|-------------|-------------|-------------|-------------|-------------|
| "Nmnat3"  | 6.049407    | 6.202963    | 7.0171757   | 7.596667    | 6.75201     | 6.1606736   | 6.830747    | 7.451839    |
| "Nmnrk1"  | 4.539361    | 4.390917    | 4.8796415   | 5.5650477   | 4.473436    | 3.367218    | 4.927934    | 5.4950657   |
| "Nmt1"    | 6.325092    | 6.942511133 | 6.042949    | 6.053495567 | 6.209638967 | 6.817553567 | 6.207780333 | 6.183862867 |
| "Nmt2"    | 3.1553977   | 3.203503    | 3.5055513   | 3.2407496   | 3.7543764   | 3.3222706   | 3.244482    | 3.2532265   |
| "Nnat"    | 2.7638073   | 3.0848472   | 6.129537    | 3.1352963   | 6.387225    | 3.5895975   | 4.413727    | 4.546735    |
| "Nnmt"    | 11.470606   | 6.9854283   | 7.5552297   | 5.587518    | 8.237461    | 9.126408    | 8.579178    | 6.5703015   |
| "Nnt"     | 9.05028275  | 8.663153    | 7.992095    | 9.192636    | 8.768932    | 8.24951325  | 8.732385    | 9.6052745   |
| "Noa1"    | 6.0663495   | 6.1844726   | 6.538827    | 6.5966396   | 6.501145    | 6.20691     | 6.821716    | 6.5362906   |
| "Noc2l"   | 6.955431    | 7.242523    | 6.8242917   | 7.2599454   | 6.6629424   | 7.03721     | 6.9991255   | 7.090747    |
| "Noc3l"   | 3.4310532   | 3.2779484   | 3.2729378   | 3.11169     | 3.3119733   | 3.315629    | 3.2690666   | 3.097362    |
| "Noc4l"   | 6.7675958   | 7.514497433 | 6.384659767 | 6.436255567 | 6.790958333 | 6.6915938   | 6.4396028   | 6.410035133 |
| "Nodal"   | 2.6588924   | 2.7142932   | 2.6865156   | 2.7545981   | 2.6848707   | 2.6548004   | 2.7702649   | 2.7878115   |
| "Nol11"   | 5.2485102   | 5.861698    | 5.391841833 | 5.4764084   | 5.3558965   | 5.430775567 | 5.418280367 | 5.494080733 |
| "Nol12"   | 7.9245734   | 8.610508    | 8.772308    | 8.390134    | 7.824292    | 7.510478    | 8.475484    | 8.346314    |
| "Nol3"    | 9.017329    | 8.778926    | 8.661267    | 8.510892    | 8.230865    | 8.070919    | 9.607445    | 8.116188    |
| "Nol6"    | 2.4443908   | 3.1965628   | 2.571879    | 2.618359    | 2.5476093   | 2.4334636   | 2.5311604   | 2.544385    |
| "Nol7"    | 7.099591567 | 7.705608633 | 7.065526133 | 7.3244589   | 7.192609767 | 7.254746433 | 6.966810533 | 7.567610433 |
| "Nolc1"   | 6.806604533 | 7.334029733 | 6.046229567 | 6.230971667 | 6.5156707   | 7.071930067 | 6.3136651   | 6.249624    |
| "Nomo1"   | 7.0956822   | 7.7341835   | 7.419727    | 7.2474737   | 7.140772    | 6.7994865   | 7.53989935  | 7.12311885  |
| "Nono"    | 6.6918752   | 6.753847    | 6.805787167 | 6.761256833 | 6.851333267 | 7.0172565   | 6.863815    | 6.834513567 |
| "Nop10"   | 10.5806065  | 10.7884235  | 10.5770025  | 10.6772795  | 10.610864   | 10.6101655  | 10.6866215  | 10.6211645  |
| "Nop14"   | 7.281229    | 8.025364    | 6.7515454   | 6.8860445   | 7.659319    | 7.834777    | 7.062294    | 6.9882207   |
| "Nop16"   | 4.95687975  | 4.98549045  | 4.8170693   | 4.88787865  | 4.82502855  | 4.70829485  | 4.77567445  | 4.8689397   |
| "Nop2"    | 6.489258    | 7.349209    | 6.462107    | 6.481795    | 7.112205    | 6.6375546   | 6.6252255   | 6.357403    |
| "Nop56"   | 7.776619    | 8.795814    | 7.824133678 | 7.8918175   | 7.916699    | 8.4078347   | 7.8189041   | 7.9633357   |
| "Nop58"   | 7.712196    | 8.326591    | 7.336771    | 7.089693    | 7.45174     | 8.202705    | 7.3643622   | 6.9923263   |
| "Nos1"    | 3.73320935  | 3.7878758   | 3.7790412   | 4.60052975  | 3.5301713   | 3.332531    | 3.9616016   | 4.13628375  |
| "Nos3"    | 5.516608    | 5.811828    | 5.6068296   | 5.873647    | 5.9147854   | 6.1483655   | 6.088695    | 5.844571    |
| "Nosip"   | 5.8125062   | 6.04789135  | 5.90302755  | 6.05038905  | 5.868315    | 5.6389387   | 5.9513115   | 5.775432    |
| "Notch1"  | 5.50021685  | 5.3648075   | 5.43595805  | 5.221969    | 5.67033615  | 5.9783861   | 5.77052605  | 5.4429093   |
| "Notch2"  | 7.490974    | 7.2664037   | 7.9701886   | 6.8886294   | 7.6390285   | 8.256601    | 7.4873085   | 7.328069    |
| "Notch3"  | 3.8562813   | 4.11859025  | 4.37146465  | 4.72562675  | 4.38976735  | 4.2696507   | 4.5706437   | 4.60702805  |
| "Notch4"  | 5.561003    | 5.5100727   | 4.8867207   | 5.2496505   | 5.5128007   | 6.001577    | 5.00105     | 5.314928    |
| "Notum"   | 2.3603015   | 2.3992405   | 2.3878953   | 2.4390895   | 2.3860247   | 2.3757386   | 2.383395    | 2.4400213   |
| "Nov"     | 7.1569638   | 7.48590835  | 7.04303375  | 7.1677133   | 6.637712    | 7.8575175   | 5.9377452   | 6.494179    |
| "Nova1"   | 3.6853675   | 3.82303455  | 4.06377765  | 4.18536035  | 4.487386    | 3.9590905   | 4.0003327   | 4.035493    |
| "Nox4"    | 3.04825355  | 5.17090065  | 3.712478    | 3.8768699   | 5.5251298   | 6.0869307   | 4.5889795   | 4.47107485  |
| "Npas2"   | 6.446873    | 2.6936774   | 2.469843    | 2.534038    | 2.4606757   | 2.5325062   | 2.4285772   | 2.5127041   |
| "Npas3"   | 3.0002456   | 3.1146786   | 3.0537648   | 3.1724153   | 3.0561774   | 2.9403048   | 3.0202527   | 3.1347167   |
| "Npc1"    | 9.756587    | 11.954689   | 7.497448    | 8.439606    | 10.512432   | 11.69546    | 7.4454565   | 8.636746    |
| "Npc2"    | 9.9976615   | 8.9355      | 9.80552525  | 8.8388145   | 10.1353825  | 10.340379   | 10.3741425  | 9.191922    |
| "Npdc1"   | 5.3059225   | 5.94329     | 6.3924284   | 6.080516    | 6.3607764   | 6.6187463   | 6.517903    | 6.169255    |
| "Npepl1"  | 8.238786    | 8.4560585   | 8.27474     | 8.567518    | 7.710559    | 7.841985    | 8.7620125   | 8.377302    |
| "Npepps"  | 8.6366152   | 8.38996135  | 8.5740428   | 8.73649475  | 8.6345328   | 8.52818365  | 8.82223     | 8.91374815  |
| "Nphp1"   | 5.484527067 | 6.176976833 | 6.045472    | 6.277163733 | 5.608919867 | 5.323975367 | 5.803380767 | 6.049672467 |
| "Nphs1"   | 2.3358192   | 2.4231055   | 2.3986647   | 2.4597855   | 2.3989632   | 2.3811188   | 2.3750324   | 2.4606197   |
| "Npl"     | 3.4974144   | 3.2944186   | 4.649468    | 3.6851606   | 3.40064     | 3.6062806   | 4.637537    | 3.567723    |
| "Nploc4"  | 8.661019    | 9.44309     | 7.833658    | 8.058293    | 8.527783    | 9.505161    | 8.678231    | 8.009801    |
| "Npm3"    | 5.1040015   | 4.9913206   | 5.284966    | 4.813595    | 4.629992    | 4.7860847   | 5.7489266   | 4.8152075   |
| "Npn2"    | 2.3428903   | 2.3772192   | 2.3500304   | 2.4266248   | 2.3499265   | 2.2954454   | 2.3408546   | 2.430443    |
| "Npnt"    | 3.876963375 | 3.77450685  | 3.559487375 | 4.97628925  | 3.7319988   | 4.008474825 | 3.716545125 | 4.139181475 |
| "Nppa"    | 2.738809    | 2.8688295   | 2.8238423   | 2.8908188   | 2.8263905   | 2.8030558   | 2.8220842   | 2.8919725   |
| "Npr1"    | 2.4463027   | 2.9325972   | 2.5357757   | 2.6034272   | 2.5360556   | 2.5160313   | 2.4940815   | 2.586642    |
| "Npr2"    | 6.196287    | 5.757881    | 6.235881    | 6.5797024   | 6.4704914   | 5.792257    | 6.4015927   | 6.2965055   |
| "Npr3"    | 4.975700533 | 3.9508235   | 4.9672193   | 4.434174667 | 5.8145932   | 4.236061567 | 4.458121333 | 5.090465567 |
| "Nprl2"   | 5.2218544   | 5.2401776   | 5.8945312   | 6.0647492   | 5.623311    | 5.66057     | 6.233584    | 5.60157     |
| "Nprl3"   | 4.4784536   | 5.1456604   | 4.4661646   | 4.514186    | 4.483548    | 4.449775    | 4.6700015   | 3.9202847   |
| "Nptn"    | 9.535605    | 10.036631   | 10.653731   | 10.664381   | 10.544877   | 9.910292    | 10.330758   | 10.703904   |
| "Npvf"    | 2.8221102   | 2.9306383   | 2.900194    | 2.9557178   | 2.908543    | 2.8716054   | 2.8934388   | 2.9789462   |
| "Npy1r"   | 3.5744238   | 3.9793904   | 3.6783862   | 3.0850382   | 4.3600764   | 4.179514    | 3.8021452   | 3.761482    |
| "Npy2r"   | 2.8375435   | 3.0185359   | 2.90451     | 3.0906901   | 2.9099455   | 2.845834    | 2.9030926   | 3.0370715   |
| "Npy5r"   | 2.3825893   | 2.4956312   | 2.4357245   | 2.5403585   | 2.4358757   | 2.4191635   | 2.4264276   | 2.5267062   |
| "Nqo1"    | 6.336006    | 5.906121    | 6.316619    | 7.2007904   | 6.2301464   | 5.1183147   | 6.1365747   | 6.5413404   |
| "Nqo2"    | 5.2332487   | 4.159253    | 5.3962936   | 5.6544294   | 5.107547    | 4.6391187   | 5.3714056   | 5.320593    |
| "Nr0b1"   | 2.3482268   | 2.578267    | 2.394914    | 2.4926467   | 2.416147    | 2.345974    | 2.4190466   | 2.483084    |
| "Nr0b2"   | 2.5684552   | 2.2055252   | 2.1869328   | 2.2533684   | 2.1652937   | 2.1159596   | 2.1540747   | 2.2475579   |
| "Nr1d1"   | 7.3658905   | 7.02822     | 6.198142    | 5.987108    | 6.4580255   | 5.6011305   | 5.628688    | 6.231277    |
| "Nr1d2"   | 6.5287246   | 6.8658695   | 7.1983135   | 7.2668952   | 7.0383541   | 6.8672852   | 7.15074585  | 7.25755775  |
| "Nr1h2"   | 4.3442626   | 4.6640663   | 4.712515    | 4.3776555   | 4.266254    | 4.437499    | 4.3448997   | 4.1044655   |
| "Nr1h3"   | 2.5748882   | 2.440918    | 2.3876803   | 2.3488688   | 2.991667    | 4.0537596   | 3.3366976   | 2.4770555   |
| "Nr1h4"   | 4.501035    | 2.6616569   | 2.6013908   | 2.6884466   | 2.6344178   | 2.6486115   | 2.6000743   | 2.703949    |
| "Nr1i2"   | 2.471887    | 2.2899559   | 2.2831519   | 2.3326771   | 2.262539    | 2.2221808   | 2.2536361   | 2.3325481   |
| "Nr2c1"   | 4.894116    | 5.504798    | 4.9588995   | 4.945589    | 4.9624033   | 5.1096897   | 4.956911    | 4.80974     |
| "Nr2c2"   | 3.8443115   | 4.365189    | 3.785042633 | 4.058612867 | 3.904342567 | 3.998640567 | 3.753152933 | 3.996266667 |
| "Nr2c2ap" | 2.4374595   | 2.4409163   | 2.444567    | 2.4766238   | 2.433909    | 2.4496999   | 2.4398308   | 2.4792879   |
| "Nr2f1"   | 3.3829982   | 3.6082692   | 3.417278    | 3.7359455   | 3.5289307   | 3.4175277   | 3.4953232   | 3.653349    |
| "Nr2f2"   | 4.690819433 | 5.027168767 | 4.9671778   | 5.099760167 | 5.056608533 | 4.81395     | 4.9324226   | 4.9670455   |
| "Nr2f6"   | 6.4778199   | 6.27248505  | 6.36463925  | 6.84856315  | 6.170511    | 5.7662432   | 6.5189045   | 6.3875775   |
| "Nr3c1"   | 7.234144533 | 7.3007249   | 7.403757567 | 7.389403667 | 7.029366    | 6.722095867 | 7.1529813   | 7.098293467 |
| "Nr4a1"   | 9.740841    | 8.061327    | 11.243749   | 11.223893   | 8.460665    | 7.1161985   | 10.643715   | 10.842651   |
| "Nr4a2"   | 3.31957875  | 3.33935445  | 3.3348223   | 3.6523651   | 3.37182155  | 3.19234     | 3.6032283   | 3.4000572   |

|            |             |             |             |             |             |             |             |             |
|------------|-------------|-------------|-------------|-------------|-------------|-------------|-------------|-------------|
| "Nr5a1"    | 2.6719415   | 2.787467    | 2.8866045   | 2.8206053   | 2.7533035   | 2.752697    | 2.6712124   | 2.6892102   |
| "Nr5a2"    | 3.417443133 | 2.632319767 | 2.567105567 | 2.66326     | 2.5391818   | 2.534273867 | 2.5658064   | 2.606853333 |
| "Nr6a1"    | 2.4446886   | 2.5191154   | 2.4546244   | 2.5441027   | 2.4652784   | 2.4257803   | 2.4600756   | 2.5417836   |
| "Nrap"     | 12.375327   | 12.890891   | 12.273791   | 12.171838   | 12.590953   | 12.462136   | 12.272581   | 12.203709   |
| "Nrarp"    | 2.22900815  | 2.6365583   | 3.00384365  | 2.7360467   | 2.556621    | 2.58378745  | 2.6364421   | 2.8530046   |
| "Nras"     | 6.5394798   | 6.588346967 | 6.709445533 | 6.6835469   | 6.327357    | 6.475137733 | 7.195753233 | 6.885281567 |
| "Nrbf2"    | 9.279821    | 9.917314    | 8.932279    | 9.208832    | 10.042352   | 9.290729    | 8.786396    | 9.070341    |
| "Nrbp1"    | 6.7093725   | 6.923422    | 6.75673     | 6.852922    | 6.775669    | 6.7319136   | 6.7353106   | 6.712319    |
| "Nrpb2"    | 6.94574     | 6.3208504   | 6.1041327   | 5.180211    | 6.677971    | 6.846507    | 6.489738    | 5.8445234   |
| "Nrcam"    | 2.266539    | 2.290305    | 2.2892992   | 2.3637078   | 2.3923986   | 2.2559235   | 2.5861816   | 2.3386605   |
| "Nrd1"     | 7.74327325  | 8.1620748   | 8.20501215  | 8.591707    | 7.93483085  | 7.7438623   | 8.25012975  | 8.3046135   |
| "Nrf1"     | 3.369887767 | 4.314825033 | 3.6607409   | 3.478485    | 3.9875213   | 4.168272467 | 3.7057391   | 3.6148545   |
| "Nrg3"     | 2.4716358   | 2.5980031   | 2.5198164   | 2.6478329   | 2.5261245   | 2.478181    | 2.5192466   | 2.627015    |
| "Nrg4"     | 4.463287    | 2.26969     | 2.224905    | 2.3469462   | 3.3877017   | 3.0277786   | 4.865708    | 2.3328185   |
| "Nrip1"    | 8.16970375  | 8.4077845   | 8.72879425  | 8.72056785  | 8.0760995   | 8.0885995   | 8.7305375   | 8.32126435  |
| "Nrip2"    | 2.5153503   | 2.6121552   | 2.592453    | 2.6069715   | 2.60469     | 2.5025518   | 2.5535796   | 2.5183182   |
| "Nrip3"    | 2.60028445  | 2.71903645  | 2.674767    | 2.77328685  | 2.66358755  | 2.6195171   | 2.6553551   | 2.7725497   |
| "Nrk"      | 2.37342067  | 2.4782045   | 2.6195078   | 2.719156533 | 2.425682467 | 2.388320067 | 2.4314913   | 2.5551838   |
| "Nrm"      | 2.1485472   | 2.1721196   | 2.1752224   | 2.2284458   | 2.1718414   | 2.3947573   | 2.1874332   | 2.2230246   |
| "Nrp1"     | 8.190282    | 7.264101    | 8.617136667 | 8.856364333 | 8.541127167 | 8.649737    | 8.771694    | 8.998799667 |
| "Nrp2"     | 2.8779964   | 3.0887356   | 3.2874665   | 3.1313384   | 3.1517193   | 3.435706    | 3.19815     | 3.133472    |
| "Nrsn1"    | 2.5380297   | 2.679006    | 2.6316795   | 2.7444744   | 2.6233249   | 2.5595343   | 2.6219914   | 2.6919708   |
| "Nrtn"     | 1.8578095   | 2.407157    | 1.8782289   | 1.7508733   | 2.0868115   | 1.8615937   | 1.8560573   | 1.7207038   |
| "Nsa2"     | 2.3333366   | 2.4826548   | 2.3703012   | 2.4731565   | 2.3675451   | 2.3361094   | 2.364426    | 2.461676    |
| "Nsdlh"    | 7.3414164   | 4.971128    | 5.485072    | 5.5912633   | 5.0060263   | 4.4089384   | 5.972709    | 5.350301    |
| "Nsf"      | 5.0894506   | 5.07679315  | 5.38407465  | 5.61251085  | 5.06590965  | 5.18621155  | 5.44216815  | 5.203565    |
| "Nsfl1c"   | 9.214676    | 9.858292    | 9.300967    | 9.252558    | 9.437389    | 10.286613   | 9.169365    | 9.261807    |
| "Nsg1"     | 2.90065345  | 2.97310875  | 2.9841559   | 3.0048206   | 2.905357    | 2.96654545  | 2.8195015   | 3.0163992   |
| "Nsmaf"    | 6.4892206   | 7.7332087   | 6.659978    | 6.96556     | 7.049882    | 7.7429366   | 6.6735935   | 7.2689457   |
| "Nsmce1"   | 7.7329355   | 7.91662125  | 7.73713875  | 7.4559721   | 8.0876458   | 8.226012    | 7.85454215  | 7.500854    |
| "Nsmce2"   | 6.2048197   | 6.6926985   | 6.3240023   | 6.0009155   | 6.840183    | 6.8096566   | 6.0477395   | 5.8863935   |
| "Nsme4a"   | 6.1831285   | 6.3255802   | 6.06807665  | 6.0375268   | 6.2805848   | 6.2740185   | 6.1091216   | 6.12118635  |
| "Nsun2"    | 9.171455    | 9.598757    | 8.639826    | 8.823606    | 9.066061    | 9.172115    | 9.430647    | 8.830543    |
| "Nsun4"    | 7.23035275  | 6.9706793   | 7.11792935  | 7.6471358   | 7.3748298   | 6.6721878   | 7.2793215   | 7.6356735   |
| "Nsun5"    | 3.2765288   | 3.5356464   | 3.484054    | 3.6230202   | 3.3638756   | 3.4324706   | 3.5322013   | 3.8701267   |
| "Nsun6"    | 2.7485973   | 3.00331035  | 2.9017361   | 2.9928464   | 2.93341625  | 2.83087155  | 2.90654655  | 3.00832115  |
| "Nt5c"     | 6.3953147   | 5.644127    | 6.340123    | 6.0470395   | 6.2099566   | 6.976156    | 6.714335    | 6.3173733   |
| "Nt5c2"    | 3.597304767 | 3.370560367 | 3.3293488   | 3.398061967 | 3.532977033 | 3.591427367 | 3.445203967 | 3.295488733 |
| "Nt5c3"    | 10.143283   | 10.315748   | 10.037374   | 9.899364    | 10.50234    | 10.361732   | 9.838961    | 10.090737   |
| "Nt5c31"   | 3.50039675  | 3.70946085  | 3.77912795  | 3.9928042   | 3.70980895  | 3.6252953   | 4.0391923   | 4.05360855  |
| "Nt5dc3"   | 8.402308    | 9.477864    | 7.917262    | 8.176527    | 8.304626    | 8.171925    | 7.8741965   | 8.108729    |
| "Nt5m"     | 6.6115904   | 7.0702643   | 6.889304    | 6.8060646   | 6.590123    | 6.214168    | 6.7063184   | 6.998224    |
| "Ntan1"    | 8.518819    | 8.778294    | 9.080482    | 9.113457    | 8.705515    | 8.357559    | 9.208515    | 9.032825    |
| "Ntf3"     | 3.1713736   | 3.4137938   | 3.734111    | 4.421802    | 3.3736165   | 3.2157998   | 3.6597862   | 4.4970784   |
| "Nthl1"    | 2.6675713   | 2.6624339   | 2.6306295   | 2.7062068   | 2.6696973   | 2.5883963   | 2.651038    | 2.698441    |
| "Ntnm"     | 2.8672972   | 3.1550186   | 2.9062731   | 3.1250107   | 3.2973993   | 2.8495846   | 2.8844829   | 2.9690435   |
| "Ntn1"     | 5.721876    | 6.277401    | 7.3410926   | 6.3485703   | 6.5944147   | 6.6555805   | 6.386032    | 6.2072854   |
| "Ntn4"     | 2.3733292   | 2.3996959   | 2.3784604   | 2.4454541   | 2.3796215   | 2.3641648   | 2.370432    | 2.4470124   |
| "Ntnng1"   | 2.4474337   | 2.54459155  | 2.49283815  | 2.5923752   | 2.765686    | 2.42125595  | 2.5437281   | 2.5686244   |
| "Ntpocr"   | 5.710357    | 5.447535    | 5.570533    | 5.5889654   | 5.3806047   | 5.4910383   | 5.498106    | 5.3781166   |
| "Ntrk2"    | 3.2251532   | 4.2678742   | 6.005164    | 4.540588    | 7.081712    | 5.5864997   | 6.1009293   | 5.4153323   |
| "Ntrk3"    | 2.5206602   | 2.654383867 | 2.581514467 | 2.679324233 | 2.583369933 | 2.552077433 | 2.592464367 | 2.651095933 |
| "Nts"      | 2.3192914   | 2.4209278   | 2.3506966   | 2.4689045   | 2.3309617   | 2.3125916   | 2.3508472   | 2.4505491   |
| "Ntsr2"    | 3.458182    | 3.449981    | 3.5529048   | 3.3952649   | 3.2357554   | 3.0978148   | 3.2442148   | 3.1888013   |
| "Nub1"     | 5.254986625 | 6.1701888   | 5.002620375 | 4.98111275  | 5.4346149   | 5.68374265  | 5.023122975 | 5.2133652   |
| "Nubp1"    | 4.327832233 | 4.0210989   | 4.171175867 | 4.259249533 | 3.9619138   | 4.119352333 | 4.522175133 | 4.23655567  |
| "Nubp2"    | 6.2131658   | 6.6377096   | 5.1697145   | 5.60135     | 6.2969685   | 6.1579037   | 5.8497214   | 5.642922    |
| "Nucb1"    | 6.691979    | 6.653729    | 6.868058    | 6.431411    | 6.9649763   | 6.9556637   | 6.86369     | 6.4593325   |
| "Nucb2"    | 5.606575    | 5.024537    | 7.0075645   | 5.869527    | 5.864184    | 6.0251846   | 5.9853845   | 6.3648205   |
| "Nucks1"   | 7.801209933 | 8.132794333 | 8.165650333 | 8.266863633 | 7.884401    | 7.9556149   | 8.018248733 | 8.239944967 |
| "Nudc"     | 8.7794455   | 9.0460015   | 8.878513    | 8.780807    | 8.716863    | 8.65806085  | 9.018661    | 8.9432515   |
| "Nudcd1"   | 2.48064495  | 2.5702381   | 2.5143863   | 2.6498675   | 2.5127282   | 2.4822225   | 2.63908925  | 2.63358975  |
| "Nudcd2"   | 7.994517    | 8.4052387   | 8.4321563   | 8.82514     | 8.70924715  | 8.346636    | 8.3982385   | 8.7789485   |
| "Nudcd3"   | 7.2614093   | 7.5061936   | 7.4396133   | 7.637416    | 7.1257305   | 7.0278263   | 7.231958    | 7.5496144   |
| "Nudt1"    | 4.4079976   | 3.9286296   | 4.814604    | 4.305742    | 3.5938287   | 3.3798184   | 4.3952136   | 4.307853    |
| "Nudt10"   | 2.4053967   | 2.475445    | 2.6012933   | 2.7760184   | 2.4820883   | 2.3381526   | 2.5103953   | 2.5819278   |
| "Nudt13"   | 4.6670928   | 4.96621535  | 5.12624705  | 5.2600817   | 5.4141944   | 4.624442    | 5.2282805   | 5.3613566   |
| "Nudt14"   | 4.987529    | 3.7946932   | 4.8180313   | 4.537632    | 4.5156946   | 4.3842487   | 5.1855826   | 4.1172724   |
| "Nudt16"   | 6.83377     | 7.007151    | 6.33931     | 6.367784    | 7.1306024   | 6.6599636   | 6.3055105   | 5.986895    |
| "Nudt16l1" | 5.69882375  | 5.8839719   | 6.1480003   | 6.2693975   | 6.567772    | 5.952491    | 6.098156    | 6.00228     |
| "Nudt19"   | 8.7659645   | 9.188506    | 9.144586    | 9.477509    | 8.840204    | 8.50186015  | 8.9857325   | 9.1544805   |
| "Nudt2"    | 8.414719    | 8.796027    | 9.024655    | 8.909249    | 8.618128    | 7.7986374   | 9.160217    | 8.84349     |
| "Nudt21"   | 8.872219    | 9.110744    | 8.667139    | 8.527283    | 8.922194    | 9.26494     | 8.936493    | 8.524376    |
| "Nudt22"   | 3.7214004   | 3.8479589   | 3.5678645   | 3.9619998   | 3.9170862   | 3.5708165   | 3.82159495  | 3.7172498   |
| "Nudt3"    | 8.915633    | 9.308974    | 9.996906    | 10.168593   | 9.182466    | 8.93966     | 9.561898    | 10.026508   |
| "Nudt4"    | 9.793638    | 8.6183053   | 10.548326   | 10.299413   | 10.04552    | 9.2733555   | 10.7263905  | 10.6136085  |
| "Nudt5"    | 3.356337    | 2.9419456   | 3.0225291   | 3.078808    | 3.564035    | 4.4535875   | 5.3518777   | 3.4505439   |
| "Nudt6"    | 7.015759    | 7.6856775   | 7.2725787   | 7.7813797   | 7.4224353   | 6.2049007   | 7.3052154   | 7.4009576   |
| "Nudt7"    | 8.915348    | 7.7052      | 8.56617     | 9.317753    | 9.642756    | 8.832011    | 9.221657    | 9.413895    |
| "Nudt8"    | 7.4722266   | 5.946374    | 6.665132    | 7.2687902   | 6.853858    | 6.1184278   | 7.7806015   | 6.9517446   |
| "Nudt9"    | 9.1630745   | 9.546753    | 9.381396    | 9.64786     | 9.226885    | 9.0205765   | 9.660956    | 9.479503    |

|            |             |             |             |             |             |             |             |             |
|------------|-------------|-------------|-------------|-------------|-------------|-------------|-------------|-------------|
| "Nuf2"     | 2.5377483   | 2.5842218   | 2.5720327   | 2.6440544   | 2.5789082   | 2.5633187   | 2.565982    | 2.6596591   |
| "Nufip1"   | 7.5264535   | 8.233809    | 6.2195463   | 6.79866     | 7.3436537   | 8.000211    | 5.883904    | 6.7888007   |
| "Numa1"    | 6.535826    | 6.9207015   | 6.46738175  | 6.2898409   | 6.84831225  | 7.3092778   | 6.34297085  | 6.2546633   |
| "Numb"     | 5.01443795  | 5.2283024   | 5.087248    | 5.0917037   | 5.1884221   | 5.2752253   | 4.9566115   | 5.13198545  |
| "Numb1"    | 4.007477    | 4.4263377   | 4.1454687   | 4.0782423   | 4.3236547   | 4.107981    | 4.144562    | 4.264449    |
| "Nup107"   | 5.733652    | 6.673695    | 5.759184    | 5.5456343   | 6.2257705   | 6.053144    | 6.120771    | 5.7762246   |
| "Nup133"   | 5.6120786   | 5.860472575 | 5.494689325 | 5.78224155  | 5.6049022   | 5.406770975 | 5.649009375 | 6.1309935   |
| "Nup153"   | 8.880516    | 9.297302    | 8.860016    | 9.260632    | 9.250601    | 9.433136    | 8.886728    | 9.364081    |
| "Nup155"   | 3.87056625  | 4.13186655  | 3.8810734   | 3.8796532   | 3.9633088   | 3.95905375  | 3.69901175  | 3.79382535  |
| "Nup160"   | 5.7268214   | 6.0215173   | 5.451302    | 5.024168    | 5.974556    | 6.1967006   | 5.44772     | 5.822451    |
| "Nup188"   | 3.9461563   | 4.7378893   | 4.402088    | 4.1265173   | 4.457135    | 4.636149    | 4.2834854   | 4.0183005   |
| "Nup210"   | 6.255933    | 7.396261    | 6.9063215   | 7.6355743   | 6.6808186   | 7.606821    | 6.703797    | 7.1461916   |
| "Nup35"    | 5.1085987   | 5.5136247   | 5.9838586   | 5.643357    | 5.516297    | 5.473855    | 6.2566586   | 5.7563915   |
| "Nup43"    | 3.73801115  | 3.6587229   | 3.88660995  | 3.8397661   | 3.62998125  | 3.29412985  | 4.5663352   | 4.1561334   |
| "Nup50"    | 4.860374233 | 5.133011167 | 4.813986433 | 4.907382267 | 4.889941733 | 4.986486667 | 4.864199    | 4.780720767 |
| "Nup54"    | 5.8400331   | 6.2047783   | 5.651633067 | 5.8615454   | 5.9793921   | 6.242456633 | 5.8909267   | 5.896242567 |
| "Nup62"    | 7.888548433 | 8.329975    | 7.139024333 | 7.046021767 | 7.575433833 | 8.108406667 | 7.274229833 | 6.984504767 |
| "Nup85"    | 6.2566927   | 6.726835    | 6.5431927   | 6.6893707   | 6.384009    | 6.2047852   | 6.3543833   | 7.0012908   |
| "Nup88"    | 8.593946    | 8.941845    | 8.512725    | 8.549777    | 8.88509     | 8.891865    | 8.602624    | 8.626054    |
| "Nup93"    | 6.986266    | 7.7461033   | 7.1819067   | 7.298126    | 7.476966    | 8.378582    | 7.2879314   | 7.393656    |
| "Nup98"    | 5.7016764   | 5.1587863   | 4.9067073   | 4.7049193   | 4.9058585   | 5.261156    | 4.4437933   | 5.1471543   |
| "Nupl1"    | 6.135611925 | 6.681579025 | 6.53971595  | 6.482123325 | 6.423329625 | 6.336033675 | 6.4096401   | 6.401440925 |
| "Nupl2"    | 2.5106442   | 2.8670084   | 2.7462342   | 2.6483843   | 2.5589848   | 2.6717703   | 2.717697    | 2.6342347   |
| "Nupr1"    | 7.43184875  | 6.1345289   | 8.4578195   | 7.29964     | 8.2961825   | 7.91077015  | 7.2580162   | 7.899455    |
| "Nus1"     | 5.517139033 | 5.138091533 | 5.3379715   | 5.6055158   | 5.431708567 | 5.744805067 | 5.840321533 | 5.4605205   |
| "Nusap1"   | 2.5874244   | 2.69191615  | 2.66692999  | 2.7716203   | 2.69549545  | 2.7947997   | 2.6631154   | 2.7386004   |
| "Nvl"      | 3.8787721   | 4.3014123   | 3.8748738   | 4.0691515   | 4.3576666   | 3.9884368   | 4.03511045  | 3.851113    |
| "Nxf1"     | 8.143232    | 8.465313    | 8.177052    | 8.094361    | 8.3041115   | 8.718929    | 8.166246    | 8.012008    |
| "Nxf7"     | 2.3875802   | 2.4784706   | 2.4516416   | 2.515905    | 2.4509938   | 2.4109612   | 2.449084    | 2.52461     |
| "Nxn"      | 6.03341065  | 6.529701    | 6.0311655   | 6.534471    | 5.93075615  | 6.17750365  | 6.6726145   | 6.3812225   |
| "Nxn12"    | 2.659015    | 2.7399924   | 2.6950445   | 2.8111167   | 2.6998315   | 2.65661     | 2.6943219   | 2.7785983   |
| "Nxph3"    | 3.4072728   | 3.8599145   | 4.103716    | 3.8943274   | 3.9601004   | 3.6410058   | 3.9345713   | 3.7557495   |
| "Nxt1"     | 6.081842    | 6.92682     | 6.508012    | 5.83744     | 6.804902    | 6.3319263   | 6.4432645   | 6.316469    |
| "Oaf"      | 7.690712    | 2.531084    | 6.3220587   | 5.610163    | 4.196087    | 4.0976133   | 5.1645675   | 5.701644    |
| "Oas1a"    | 3.9711971   | 2.8227835   | 2.9172125   | 3.2020576   | 2.8110833   | 3.5967956   | 5.6809607   | 3.2386692   |
| "Oas1c"    | 2.377507    | 2.4712484   | 2.4247851   | 2.5174913   | 2.4223583   | 2.377193    | 2.4232955   | 2.4965732   |
| "Oas1d"    | 2.3128803   | 2.3848443   | 2.3439834   | 2.455188    | 2.3462358   | 2.309405    | 2.338004    | 2.4334767   |
| "Oas1e"    | 2.5409489   | 2.5798059   | 2.5422072   | 2.5962648   | 2.5709891   | 2.5414      | 2.5435991   | 2.6167448   |
| "Oas1h"    | 2.2973404   | 2.391379    | 2.3339508   | 2.4477403   | 2.356351    | 2.3263068   | 2.3552704   | 2.4398973   |
| "Oas2"     | 3.2413075   | 3.341971    | 3.3590238   | 3.505197    | 3.3170924   | 3.2742817   | 3.7017334   | 3.4115312   |
| "Oasl1"    | 4.73215     | 2.7477698   | 2.6829536   | 2.722656    | 2.685309    | 2.6396387   | 2.9110627   | 2.7370965   |
| "Oasl2"    | 2.7076695   | 2.5880494   | 2.5703855   | 2.6523008   | 2.518064    | 2.6176758   | 4.2955437   | 2.7385871   |
| "Oat"      | 12.090354   | 12.203172   | 11.896878   | 11.659901   | 12.221379   | 12.10427    | 11.248358   | 11.744622   |
| "Oaz1"     | 12.69420475 | 12.818509   | 12.993213   | 12.973422   | 12.7033225  | 12.5329545  | 13.005822   | 12.917695   |
| "Oaz2"     | 8.02164415  | 7.5509767   | 8.52796815  | 8.50325     | 7.87464885  | 7.48495635  | 8.3525855   | 8.54764575  |
| "Obfc2a"   | 6.088549967 | 5.384761333 | 5.9825951   | 5.9918179   | 5.955286    | 5.9803129   | 4.743112833 | 5.7938621   |
| "Obox3"    | 2.450014    | 2.6005545   | 2.4710224   | 2.52657     | 2.4690673   | 2.428885    | 2.4531674   | 2.5282397   |
| "Obp1a"    | 2.597621    | 2.7754216   | 2.6847506   | 2.7928329   | 2.6846943   | 2.6534023   | 2.6628954   | 2.7678857   |
| "Oc90"     | 2.248321    | 2.3246222   | 2.2814565   | 2.458953    | 2.2825847   | 2.2421305   | 2.2791092   | 2.372243    |
| "Oca2"     | 2.3628917   | 2.4705145   | 2.4064565   | 2.4991455   | 2.402128    | 2.3938398   | 2.4051633   | 2.5174384   |
| "Ocel1"    | 3.3281457   | 3.3917315   | 3.3443692   | 3.270564    | 3.2980933   | 3.3284683   | 4.2100935   | 3.3865416   |
| "Ociad1"   | 6.8489876   | 7.14045415  | 6.6886888   | 6.6340247   | 6.89615825  | 6.9163954   | 6.6764382   | 6.584609    |
| "Ocln"     | 2.6973982   | 2.7816987   | 2.7172241   | 2.8394897   | 2.7225962   | 2.6878803   | 2.7067966   | 2.8255568   |
| "Odc1"     | 10.16961217 | 11.839022   | 10.26549947 | 11.26361533 | 10.07819767 | 11.2904185  | 9.041036333 | 10.45158017 |
| "Odf2"     | 4.286205    | 4.808136733 | 4.3558117   | 4.284215    | 4.747571333 | 4.572470767 | 4.444125733 | 4.356122567 |
| "Odf2l"    | 3.50018585  | 3.97184175  | 3.64533185  | 3.91434825  | 3.7841927   | 3.509156    | 3.64392755  | 3.7538144   |
| "Odz2"     | 2.889601    | 3.276156    | 2.9302025   | 2.9199579   | 2.923764    | 3.2632787   | 2.9206145   | 3.0433376   |
| "Odz3"     | 5.049288    | 6.2219954   | 7.119924    | 6.774732    | 6.2467036   | 5.363971    | 5.5944657   | 6.9074683   |
| "Odz4"     | 2.247292    | 2.5342042   | 4.774351    | 2.5632408   | 4.36504     | 2.6004925   | 5.595886    | 2.7079935   |
| "Ofa"      | 2.509121    | 2.633532    | 2.5690694   | 2.694934    | 2.5776186   | 2.5135643   | 2.569612    | 2.6736095   |
| "Ofd1"     | 5.087908    | 5.8684015   | 5.6517563   | 5.90987     | 5.587987    | 5.6884575   | 5.634658    | 5.93926     |
| "Ogdh"     | 10.768305   | 10.768093   | 10.712404   | 10.792372   | 10.913233   | 10.414943   | 10.604755   | 10.828962   |
| "Ogfod2"   | 2.6998544   | 2.6980212   | 2.7102594   | 2.7454078   | 2.6750224   | 2.6564744   | 3.0034213   | 2.7452314   |
| "Ogfr"     | 7.768364    | 8.128868    | 7.6700525   | 7.489861    | 8.1261635   | 8.081363    | 7.6558285   | 7.440281    |
| "Ogfrl1"   | 4.2805942   | 4.378440233 | 4.2692304   | 4.586405    | 4.049895367 | 4.5174981   | 4.382952833 | 4.4338627   |
| "Ogg1"     | 3.1563528   | 3.5825717   | 3.19835425  | 3.25006625  | 3.2106664   | 3.1747497   | 3.198342    | 3.2677733   |
| "Ogn"      | 9.314373    | 8.59483125  | 10.21274975 | 9.7191115   | 10.184332   | 8.94378     | 9.439198    | 10.0100885  |
| "Ogt"      | 6.90215316  | 6.95275688  | 6.94567646  | 6.9484366   | 6.92547416  | 7.2041882   | 6.85814888  | 7.06673028  |
| "Oit3"     | 3.1025558   | 2.7209258   | 2.6691947   | 2.7836444   | 2.6725187   | 2.5864074   | 2.8838282   | 2.759911    |
| "Ola1"     | 6.159737425 | 6.11457105  | 6.60442555  | 6.8088286   | 6.251783575 | 6.03373045  | 6.341345775 | 6.699523925 |
| "Olah"     | 2.9624305   | 3.2031064   | 3.1346803   | 3.2617393   | 3.1322458   | 3.0093813   | 3.099362    | 3.1899817   |
| "Olfm1"    | 4.778950567 | 4.229215167 | 4.667119367 | 4.4649428   | 4.368133667 | 4.258372467 | 4.567253767 | 4.653179    |
| "Olfm3"    | 2.722653333 | 2.960392533 | 2.8340547   | 2.999403633 | 2.8426504   | 2.7730915   | 2.830937967 | 2.9551917   |
| "Olfr12b"  | 4.211724    | 4.1243677   | 7.008823    | 5.47091     | 5.391485    | 4.340712    | 5.6173067   | 5.502404    |
| "Olfrl3"   | 4.43644     | 4.2086544   | 6.8019886   | 5.8163214   | 4.5217676   | 5.075964    | 4.738221    | 5.9352436   |
| "Olfr1507" | 2.4643867   | 2.6020927   | 2.5438087   | 2.6206758   | 2.5454044   | 2.4687746   | 2.5399451   | 2.6259494   |
| "Olfr1508" | 2.5395622   | 2.5727327   | 2.5509496   | 2.6100206   | 2.5613437   | 2.531157    | 2.547173    | 2.59867     |
| "Olfr157"  | 2.3164449   | 2.3981612   | 2.3512275   | 2.4684265   | 2.3559463   | 2.313377    | 2.3499072   | 2.4480493   |
| "Olfr159"  | 2.5023136   | 2.6163962   | 2.5645797   | 2.656052    | 2.552782    | 2.5292132   | 2.5410137   | 2.639326    |
| "Olfr64"   | 2.4029422   | 2.5491402   | 2.512106    | 2.5482032   | 2.514717    | 2.4767904   | 2.5095398   | 2.5506315   |
| "Olfr73"   | 2.3257332   | 2.4321988   | 2.366726    | 2.4721246   | 2.3732314   | 2.3397079   | 2.3713536   | 2.4520168   |

|           |             |             |             |             |             |             |             |             |
|-----------|-------------|-------------|-------------|-------------|-------------|-------------|-------------|-------------|
| "Olfr78"  | 3.1068738   | 3.3870711   | 3.2450485   | 3.5245814   | 3.2679656   | 3.1348825   | 3.229104    | 3.3998022   |
| "Olig1"   | 3.858155    | 1.7970178   | 1.7797866   | 1.8443938   | 1.7632511   | 1.7472366   | 1.7789402   | 1.8418324   |
| "Olig2"   | 2.772083    | 2.9087722   | 2.7685988   | 2.912596    | 2.7867548   | 2.7305534   | 2.7866337   | 2.8596907   |
| "Olr1"    | 2.7606063   | 2.9704108   | 2.8250315   | 2.993663    | 2.8324645   | 2.7663932   | 2.8160274   | 2.9609592   |
| "Oma1"    | 8.280025    | 8.531535    | 8.846445    | 8.947263    | 8.561066    | 8.137133    | 8.640587    | 8.778313    |
| "Omd"     | 6.470448    | 6.682969    | 6.312459    | 6.1319175   | 6.9737053   | 7.1913953   | 5.1640596   | 6.7654767   |
| "Omp"     | 2.624637    | 2.6866093   | 2.647563    | 2.7257943   | 2.6485887   | 2.6201024   | 2.63717     | 2.7345884   |
| "Omt2a"   | 2.6203752   | 2.7783465   | 2.6822703   | 2.8360596   | 2.6953554   | 2.6266189   | 2.6865435   | 2.794511    |
| "Omt2b"   | 2.5461588   | 2.7095125   | 2.660269    | 2.772702    | 2.6432307   | 2.6317656   | 2.6163542   | 2.7590215   |
| "Oncut1"  | 2.5372992   | 2.6290817   | 2.5561545   | 2.6115303   | 2.526044    | 2.5111852   | 2.5424235   | 2.6257095   |
| "Opa1"    | 5.15255915  | 4.93562115  | 5.121916    | 5.4971355   | 5.3016143   | 4.99809745  | 5.1755152   | 5.54677475  |
| "Opa3"    | 7.44423765  | 7.04987265  | 7.71831215  | 7.751693    | 7.1005887   | 7.2276067   | 7.7135812   | 7.8382677   |
| "Ophn1"   | 3.2262726   | 3.2980275   | 3.1242355   | 3.24270605  | 3.9672905   | 3.9624435   | 3.4828375   | 3.2111783   |
| "Oplah"   | 7.9728613   | 6.859078    | 7.424456    | 7.527657    | 7.7802596   | 7.6671233   | 7.80712     | 7.924038    |
| "Opn3"    | 3.3030167   | 3.424083    | 4.0010114   | 3.497336    | 4.2786407   | 4.913125    | 4.451013    | 3.335232    |
| "Oprd1"   | 2.4269233   | 2.531478    | 2.4812274   | 2.591058    | 2.483512    | 2.4371448   | 2.479336    | 2.5793502   |
| "Oprl1"   | 2.9632056   | 3.3044264   | 3.0611694   | 3.240469    | 3.0722296   | 2.9872997   | 3.0545776   | 3.1443744   |
| "Oprm1"   | 2.500463    | 2.6123197   | 2.5590558   | 2.6513305   | 2.5596843   | 2.5049024   | 2.5495255   | 2.618904    |
| "Orai1"   | 4.63557695  | 4.434707    | 5.45825885  | 5.6659936   | 4.85724475  | 3.7674064   | 5.442897    | 5.1766494   |
| "Oraov1"  | 4.08479     | 5.1840057   | 5.1578293   | 5.157017    | 4.63506     | 5.5958314   | 5.1880627   | 5.2345204   |
| "Orc2"    | 5.2665053   | 6.446105367 | 4.9164714   | 5.198424533 | 5.766568333 | 5.795154633 | 5.2600578   | 5.184526267 |
| "Orc3"    | 4.6741238   | 5.169417533 | 5.477438933 | 5.2950541   | 5.041756467 | 5.2736829   | 5.206430167 | 5.395681967 |
| "Orc4"    | 5.163500733 | 5.923725333 | 5.6161635   | 5.916140767 | 5.445650233 | 5.754082167 | 5.692642567 | 5.939067333 |
| "Orc5"    | 6.8858123   | 7.1544623   | 6.734646    | 6.797387    | 7.329908    | 7.051006    | 6.821418    | 7.097237    |
| "Orc6"    | 5.8610187   | 7.18944     | 6.0181203   | 5.8727164   | 6.364707    | 6.8845334   | 6.157348    | 5.889538    |
| "ORF61"   | 8.033412    | 8.259811    | 7.942652    | 7.951204    | 8.214094    | 8.208233    | 8.065854    | 7.9089336   |
| "Orm1"    | 13.964493   | 6.121978    | 8.7206545   | 3.1876483   | 7.507102    | 5.92613     | 9.374838    | 6.3696947   |
| "Orm2"    | 12.158334   | 3.1455293   | 5.9773226   | 3.0925825   | 3.0295913   | 2.9557426   | 3.0626137   | 3.0721304   |
| "Orm3"    | 7.089934    | 2.1719453   | 2.1487634   | 2.2230186   | 2.1488526   | 2.1318886   | 2.1543343   | 2.215146    |
| "Ormdl1"  | 6.2078567   | 5.0780964   | 7.469551    | 7.9131107   | 5.8590016   | 5.7895846   | 7.244281    | 7.643201    |
| "Os9"     | 4.65729715  | 3.93253865  | 3.9767313   | 3.9587751   | 4.1672496   | 4.1237265   | 3.95017605  | 3.89728995  |
| "Osbp"    | 8.822273    | 9.241207    | 9.373993    | 9.294895    | 9.499287    | 9.039738    | 9.317955    | 9.210084    |
| "Osbpl11" | 7.8690898   | 9.5302415   | 7.81385565  | 7.8323565   | 9.271655    | 9.447641    | 7.933963    | 8.050925    |
| "Osbpl1a" | 9.88593175  | 10.8495275  | 8.904443    | 8.77907225  | 10.211064   | 10.974107   | 9.4127865   | 9.1984015   |
| "Osbpl2"  | 6.795267    | 7.479642    | 7.146715    | 7.459023    | 7.2488065   | 6.9816585   | 6.9826217   | 7.2886944   |
| "Osbpl5"  | 4.855611    | 4.969753    | 4.967376    | 5.007693    | 4.9363823   | 5.252102    | 4.9656043   | 5.0263085   |
| "Osbpl6"  | 4.0583577   | 4.478337367 | 4.790319433 | 5.205157767 | 4.643231133 | 3.902503233 | 4.2835694   | 4.723609    |
| "Osbpl9"  | 7.367522325 | 7.7975953   | 7.880309425 | 7.8911171   | 7.852943    | 7.780608825 | 7.674960475 | 8.0446264   |
| "Osgep"   | 8.268336    | 8.399326    | 8.372616    | 8.41591     | 8.08118     | 8.257501    | 8.466132    | 8.416731    |
| "Osgin1"  | 6.927964    | 5.660371    | 4.76432     | 4.9639125   | 4.8740716   | 7.020278    | 4.4928594   | 4.979324    |
| "Osgin2"  | 4.1815669   | 3.917111    | 4.051467    | 4.36504195  | 4.2699295   | 4.1536912   | 4.7795916   | 4.53301805  |
| "Osmr"    | 7.44915     | 7.7137966   | 7.0454936   | 6.610275    | 7.5292373   | 8.467469    | 7.7855196   | 7.315409    |
| "Osr1"    | 5.2442303   | 5.365373    | 5.5981364   | 4.809631    | 5.9736204   | 5.6437573   | 5.7187333   | 5.0660405   |
| "Osta"    | 2.4348884   | 2.49433     | 2.4807973   | 2.6045659   | 2.4937      | 2.4359784   | 2.478901    | 2.5363746   |
| "Ostc"    | 7.59181     | 6.3001337   | 8.671751    | 7.9626627   | 7.523671    | 7.248885    | 8.385485    | 7.9292765   |
| "Ostf1"   | 8.072717    | 7.7937984   | 8.695467    | 8.607289    | 8.438455    | 8.30461     | 8.895519    | 8.330461    |
| "Otc"     | 5.220883433 | 2.6744329   | 2.602827567 | 2.710890233 | 2.5991647   | 2.529752933 | 2.5877433   | 2.6954039   |
| "Otof"    | 2.293747    | 2.4153903   | 2.3726537   | 2.44928     | 2.3714817   | 2.355921    | 2.3707483   | 2.4214892   |
| "Otog"    | 2.053097    | 2.5185595   | 2.104508    | 2.1870356   | 2.095076    | 2.083382    | 2.1038232   | 2.1443589   |
| "Otos"    | 2.4187918   | 2.4485686   | 2.4186761   | 2.4894876   | 2.421887    | 2.3948944   | 2.4160583   | 2.4845607   |
| "Otub1"   | 5.20817565  | 5.8381512   | 5.6821444   | 5.9425475   | 5.31801375  | 5.4911962   | 5.4688275   | 5.64256435  |
| "Otub2"   | 3.9134982   | 2.8317575   | 5.5635457   | 5.7534122   | 3.061379    | 2.3294523   | 5.9916267   | 5.1015964   |
| "Otud4"   | 7.76560785  | 7.8624907   | 7.9067243   | 7.8682555   | 7.97457015  | 7.36353515  | 7.80069325  | 8.1492163   |
| "Otud5"   | 4.98649325  | 5.4614293   | 4.651316    | 4.9094918   | 4.91033315  | 5.46736535  | 4.89762045  | 4.97178265  |
| "Otud6b"  | 8.185364    | 8.593119    | 8.47471     | 8.888139    | 8.083879    | 7.913241    | 8.521109    | 8.995484    |
| "Otud7a"  | 2.4772463   | 2.5612347   | 2.486864    | 2.5899599   | 2.489533    | 2.440722    | 2.4888172   | 2.5775294   |
| "Otud7b"  | 5.4267783   | 4.644598    | 4.154127    | 4.4488783   | 4.868329    | 4.4990897   | 4.4573226   | 4.3160534   |
| "Otx2"    | 2.4475634   | 2.541309    | 2.4963167   | 2.6193323   | 2.4956772   | 2.4486601   | 2.4918463   | 2.6022494   |
| "Ovca2"   | 4.299041    | 5.1613255   | 4.8835416   | 4.0273423   | 4.475325    | 4.5342617   | 4.6696715   | 4.5906973   |
| "Ovgp1"   | 5.8056746   | 6.9999723   | 6.286854    | 5.5305214   | 6.381047    | 7.119165    | 6.650796    | 6.4498205   |
| "Ovol1"   | 2.4490688   | 2.53185     | 2.4624236   | 2.5664387   | 2.4531295   | 2.421925    | 2.453369    | 2.5520613   |
| "Oxa1"    | 5.0880558   | 5.3687858   | 5.11241375  | 5.5468205   | 5.2585295   | 4.9904262   | 5.33317975  | 5.71994985  |
| "Oxct1"   | 10.20491485 | 9.6213183   | 10.64336258 | 11.098226   | 10.35067025 | 9.816349225 | 10.13473275 | 11.48922575 |
| "Oxnad1"  | 7.16892     | 6.1399913   | 7.3183494   | 7.9893556   | 7.4539537   | 6.3346376   | 7.5099196   | 7.9645677   |
| "Oxr1"    | 8.4696735   | 8.4714425   | 8.9874803   | 9.094887    | 8.53501475  | 8.411612    | 8.877709    | 9.079804    |
| "Oxsm"    | 3.233646    | 3.0465899   | 3.000405    | 3.4307957   | 3.0176592   | 2.9641485   | 3.0114098   | 3.062936    |
| "Oxsr1"   | 7.7908554   | 8.1944895   | 8.584326    | 8.717937    | 8.23052     | 7.9258027   | 8.22221     | 8.749178    |
| "Oxtr"    | 2.8322527   | 2.9519408   | 2.8842192   | 2.9647276   | 2.8937302   | 2.866361    | 2.8808925   | 2.962525    |
| "P2rx1"   | 2.211841    | 2.527617    | 2.2352347   | 2.2763603   | 2.2241573   | 2.2193613   | 2.2321186   | 2.277636    |
| "P2rx4"   | 5.55525165  | 4.4695917   | 4.63334975  | 4.0307032   | 4.5998168   | 5.434318    | 5.174484    | 4.3261426   |
| "P2rx5"   | 5.945617    | 5.4605637   | 5.461633    | 5.4930224   | 4.873489    | 4.7405343   | 5.5584316   | 5.4946995   |
| "P2rx6"   | 4.935905    | 5.0018315   | 5.443282    | 5.4094853   | 5.043088    | 5.038766    | 5.001502    | 5.124799    |
| "P2ry14"  | 4.044716    | 3.8405218   | 3.6496696   | 3.8552456   | 3.8684978   | 3.780731    | 3.7991123   | 3.9967558   |
| "P2ry2"   | 4.125664    | 3.284742    | 4.4696646   | 5.2326026   | 4.518236    | 3.232429    | 4.7590756   | 4.8847766   |
| "P2ry4"   | 2.4539208   | 2.5193715   | 2.483807    | 2.54591     | 2.4850726   | 2.4674044   | 2.4809225   | 2.5464761   |
| "P2ry6"   | 3.7714589   | 3.785673    | 3.7458892   | 3.848451    | 3.734059    | 4.04315     | 4.329212    | 3.8427253   |
| "P4ha1"   | 4.87860025  | 4.56323285  | 6.1023588   | 5.27416005  | 4.7355434   | 4.917042    | 5.35174975  | 5.4968911   |
| "P4ha2"   | 6.8327785   | 6.568171    | 7.0431066   | 6.828848    | 6.8382897   | 6.7446427   | 7.0368247   | 7.1226344   |
| "P4hb"    | 11.36924    | 10.347997   | 11.334211   | 10.614383   | 10.901707   | 10.469637   | 11.38048    | 10.782873   |
| "Pa2g4"   | 6.00478662  | 6.33996458  | 5.73256296  | 5.77078266  | 5.94380176  | 6.08036196  | 5.76503226  | 5.88874294  |
| "Pabpc1"  | 8.109952    | 7.7672004   | 7.8613133   | 7.4659672   | 7.735226    | 7.93405645  | 7.6076167   | 7.2783005   |

|            |             |             |             |             |             |             |             |             |
|------------|-------------|-------------|-------------|-------------|-------------|-------------|-------------|-------------|
| "Pabpn1"   | 8.486521275 | 8.831715425 | 8.8001905   | 8.27246     | 8.7785042   | 8.96362375  | 8.842545325 | 8.49750165  |
| "Pacrg"    | 3.1579692   | 2.6184132   | 2.4594436   | 2.6777225   | 2.9116466   | 2.5803814   | 3.8158314   | 2.2151902   |
| "Pacrgl"   | 3.7319078   | 4.097349    | 3.6479745   | 3.714414    | 3.713404    | 4.78035     | 3.6910162   | 3.7574234   |
| "Pacs2"    | 6.159688    | 6.014738    | 6.70448     | 6.407003    | 6.3463364   | 6.1632576   | 6.6693096   | 6.428133    |
| "Pacsin3"  | 9.941466    | 10.491942   | 10.462299   | 10.426473   | 10.04896    | 9.591229    | 10.430883   | 10.073398   |
| "Padi2"    | 8.231867    | 6.9250007   | 8.280817    | 7.9887495   | 8.241891    | 6.2793093   | 8.802705    | 8.201305    |
| "Pafi1"    | 7.2553844   | 8.078368    | 6.9352417   | 6.9389305   | 7.6422005   | 7.4963055   | 7.1970377   | 7.155567    |
| "Pafah1b1" | 7.05161925  | 7.227200475 | 7.03071495  | 7.066697625 | 7.209631925 | 7.687124325 | 6.92580505  | 7.120769325 |
| "Pafah1b2" | 5.251264575 | 5.431493775 | 5.118307425 | 4.85671575  | 5.409882025 | 5.566800125 | 5.274077075 | 5.015535575 |
| "Pafah1b3" | 3.051847    | 2.9057546   | 3.0759053   | 3.123844    | 2.9469512   | 3.0045483   | 3.0792751   | 3.3604403   |
| "Pafah2"   | 5.294591    | 4.2904954   | 4.734005    | 4.4776573   | 4.382767    | 4.2448792   | 4.3103657   | 4.476955    |
| "Pag1"     | 4.511922    | 4.4153811   | 4.97560425  | 4.464178    | 4.52346455  | 5.13718545  | 4.879936    | 4.6042703   |
| "Pah"      | 12.855556   | 3.2005262   | 5.722025    | 3.2529604   | 3.6250303   | 3.4445696   | 3.1649249   | 4.7860866   |
| "Paics"    | 10.44722383 | 10.36035467 | 10.33318433 | 10.659079   | 10.52772033 | 10.308413   | 10.26514567 | 10.70584    |
| "Paip1"    | 5.98383935  | 6.12548985  | 6.103852    | 6.21384475  | 5.78818605  | 6.2096283   | 5.5078948   | 6.1730578   |
| "Paip2"    | 11.680531   | 11.95525    | 12.029891   | 11.982283   | 12.015234   | 12.016146   | 11.977686   | 12.062202   |
| "Paip2b"   | 10.614555   | 11.821334   | 10.517097   | 10.643033   | 10.882371   | 11.404343   | 10.050638   | 10.928542   |
| "Pak1"     | 5.734277467 | 4.789506033 | 6.296030833 | 5.290956033 | 4.7058037   | 4.817698067 | 6.5712557   | 6.15327433  |
| "Pak1ip1"  | 8.48414475  | 8.877152    | 8.3121887   | 8.4536535   | 8.5005535   | 8.6464481   | 8.3992852   | 8.395613    |
| "Pak2"     | 6.0516157   | 6.064973    | 5.9611504   | 5.9891492   | 6.3316195   | 6.75424035  | 6.38742535  | 5.9201939   |
| "Pak3"     | 2.72548795  | 2.8208989   | 2.7661464   | 2.88014035  | 2.77230075  | 2.68868565  | 2.75799655  | 2.9178197   |
| "Palld"    | 8.528522    | 9.349614    | 9.831852    | 9.697911    | 8.896607    | 8.414307    | 9.320796    | 9.451444    |
| "Palm"     | 2.66447065  | 2.75914715  | 2.70784545  | 2.7860126   | 2.70936085  | 2.6712849   | 2.6603874   | 2.77985825  |
| "Palmd"    | 7.366491    | 7.2066207   | 7.293562    | 7.794243    | 7.538182    | 7.2227793   | 7.3651776   | 8.105076    |
| "Pam"      | 6.6744013   | 5.514659    | 7.349354    | 6.4744353   | 6.9592757   | 6.6535354   | 6.7138596   | 6.7652464   |
| "Pam16"    | 11.572533   | 11.703995   | 11.688264   | 11.889776   | 11.655359   | 11.389229   | 11.995217   | 11.748292   |
| "Pan2"     | 6.438063    | 6.472308    | 6.5866127   | 6.2829      | 6.519475    | 7.005639    | 6.4276557   | 6.511997    |
| "Pank1"    | 9.68712     | 8.70679     | 6.58525435  | 7.3008883   | 8.964164    | 8.87235     | 6.8173075   | 8.17933965  |
| "Pank3"    | 6.2533955   | 7.381252    | 6.3350995   | 6.14748375  | 7.2743952   | 7.8673913   | 7.84017985  | 6.50628835  |
| "Panx1"    | 5.417534    | 4.1032586   | 4.683778    | 4.6846952   | 4.2158175   | 4.082981    | 5.0388985   | 3.6170342   |
| "Papd4"    | 6.05499035  | 6.2141457   | 5.57582975  | 5.78727375  | 6.325776    | 6.391784    | 5.7111857   | 5.8606947   |
| "Papola"   | 6.525287667 | 6.629232333 | 6.5475358   | 6.615250967 | 6.268360567 | 6.790119667 | 6.792062767 | 6.4570412   |
| "Papolg"   | 6.9592257   | 7.1089144   | 6.9124775   | 6.808268    | 7.1789427   | 7.130988    | 6.9403787   | 7.1216273   |
| "Pappa"    | 2.8687472   | 3.0825028   | 2.916414    | 3.0121956   | 2.986076    | 2.8406155   | 2.9145868   | 2.996541    |
| "Paps1"    | 5.238943    | 4.251795    | 6.206433    | 5.8508334   | 5.9484205   | 5.4574533   | 6.197529    | 6.1929317   |
| "Paps2"    | 4.156072525 | 4.121603125 | 3.69849895  | 3.76552455  | 4.2073999   | 4.6073077   | 3.968522225 | 3.944749775 |
| "Paqr4"    | 2.228966    | 2.2429397   | 2.230507    | 2.316773    | 2.2448006   | 2.246148    | 2.5578644   | 2.33139     |
| "Paqr7"    | 2.1617527   | 2.1801248   | 2.819239    | 2.2859416   | 2.1463833   | 1.968725    | 2.1914887   | 2.2190614   |
| "Pard3"    | 4.84591875  | 5.32834825  | 4.656722    | 4.7510321   | 4.89247465  | 4.96734305  | 4.8451722   | 4.7868506   |
| "Pard3b"   | 5.3590765   | 5.8293405   | 6.116896    | 5.9324694   | 5.852558    | 5.853222    | 5.704897    | 6.0239153   |
| "Pard6a"   | 4.5427947   | 4.7303424   | 4.9106083   | 4.6988325   | 4.8592987   | 4.6376176   | 4.722638    | 4.4894333   |
| "Pard6b"   | 2.7733892   | 3.34233875  | 2.80123445  | 2.95532335  | 2.8036356   | 2.91248145  | 2.7920253   | 2.87457505  |
| "Pard6g"   | 3.438878    | 3.758172    | 4.761441    | 3.6769047   | 4.7978587   | 4.4576817   | 4.1310616   | 3.1519456   |
| "Parg"     | 6.8463726   | 7.245844    | 6.9643445   | 7.3963747   | 6.9874754   | 7.0786114   | 7.095402    | 7.2447553   |
| "Park2"    | 2.9131913   | 2.92080115  | 2.86971305  | 2.99751435  | 2.8858486   | 2.8624909   | 2.91402445  | 2.9500395   |
| "Park7"    | 13.7407225  | 14.2482465  | 14.077047   | 14.14973    | 13.7324695  | 13.6962115  | 13.637309   | 13.944403   |
| "Parl1"    | 9.555121    | 9.904146    | 9.60001     | 9.711429    | 9.783715    | 9.614095    | 9.8941345   | 9.508317    |
| "Parm1"    | 7.2938998   | 7.0424335   | 7.8186065   | 7.3570928   | 6.4488931   | 6.03545625  | 7.6805215   | 7.0102767   |
| "Parn"     | 4.15266585  | 4.7416037   | 3.9442048   | 4.14442485  | 4.2251799   | 4.3520485   | 3.7287332   | 4.06637185  |
| "Parp1"    | 7.178102    | 7.781329567 | 8.161994967 | 8.3726046   | 7.7558419   | 7.658558133 | 7.838712333 | 8.412482467 |
| "Parp10"   | 2.3477983   | 2.089679    | 2.40585     | 2.4302952   | 2.4034336   | 2.464225    | 3.4452686   | 2.7205994   |
| "Parp12"   | 6.261554    | 4.9904613   | 6.281472    | 6.1598496   | 6.4459186   | 6.214035    | 7.2706647   | 6.5984507   |
| "Parp14"   | 5.266369    | 4.441773    | 5.5796747   | 5.743048    | 5.9491935   | 6.222494    | 6.912896    | 6.3644648   |
| "Parp16"   | 6.206615    | 2.9458213   | 3.850934    | 4.75341     | 3.1819732   | 3.156971    | 4.4919467   | 4.028646    |
| "Parp2"    | 6.625426    | 7.152367    | 6.849193    | 6.5434995   | 6.683195    | 7.09633     | 6.748994    | 6.309644    |
| "Parp3"    | 9.4376135   | 9.592637    | 9.664045    | 10.23602675 | 9.7495625   | 8.9371465   | 10.1253935  | 9.673785    |
| "Parp4"    | 6.8123155   | 6.8738127   | 5.797293    | 6.184286    | 7.1458755   | 6.9860783   | 6.479762    | 6.6007156   |
| "Parp6"    | 6.786533    | 7.2286234   | 6.7831397   | 7.2651052   | 7.019766    | 6.9934406   | 6.701377    | 7.085477    |
| "Parp8"    | 6.1574364   | 6.459825    | 6.8808517   | 7.5178604   | 6.604873    | 6.2512703   | 6.946996    | 7.0504737   |
| "Parp9"    | 5.2402177   | 3.231864    | 5.3707333   | 5.549828    | 6.155615    | 5.839849    | 6.7964344   | 5.888129    |
| "Pars2"    | 2.749854    | 3.3085427   | 2.7735023   | 2.9233227   | 3.1581123   | 3.1910343   | 2.7871363   | 2.9239743   |
| "Parva"    | 6.1991835   | 5.5143385   | 6.4628034   | 6.004825    | 6.7046595   | 6.21305     | 6.2140384   | 6.063505    |
| "Parvg"    | 2.1480577   | 2.1612716   | 2.1475232   | 2.2040446   | 2.1544118   | 2.344537    | 2.104806    | 2.188553    |
| "Pate4"    | 2.2968814   | 2.3809326   | 2.3320115   | 2.4393737   | 2.3428714   | 2.3037806   | 2.3337429   | 2.4258122   |
| "Patz1"    | 4.3218846   | 5.4962473   | 5.5780787   | 5.4417553   | 5.884326    | 5.2298465   | 5.1521635   | 5.3256893   |
| "Pawr"     | 6.4424424   | 5.0283113   | 4.8402057   | 4.405892    | 5.5861144   | 5.869181    | 4.832178    | 4.557242    |
| "Pax3"     | 2.5850217   | 2.7331421   | 2.649523    | 2.7093365   | 2.7613125   | 2.5867865   | 2.6401577   | 2.6958845   |
| "Pax6"     | 2.270631    | 2.439163    | 2.3373094   | 2.4012642   | 2.3502452   | 2.3160932   | 2.337858    | 2.399063    |
| "Pax9"     | 2.5366545   | 2.675578    | 2.6024246   | 2.7094514   | 2.605465    | 2.5469954   | 2.5993037   | 2.711835    |
| "Paxip1"   | 4.680447125 | 5.939666275 | 4.41112065  | 4.5305531   | 5.2828775   | 5.729240925 | 4.292489525 | 4.60624225  |
| "Pbk"      | 2.5926354   | 2.6750722   | 2.7960045   | 2.6836536   | 2.6360555   | 2.6797242   | 2.6340382   | 2.668065    |
| "Pbld1"    | 3.94057     | 2.5964575   | 2.5404627   | 2.6313317   | 2.6936247   | 2.5613127   | 2.5390089   | 2.6249123   |
| "Pbld2"    | 4.4305      | 2.9195862   | 2.8714204   | 2.99328     | 2.9229665   | 2.8087275   | 2.8487976   | 2.9673593   |
| "Pbp2"     | 2.3854365   | 2.452622    | 2.418377    | 2.5180035   | 2.4214456   | 2.3965652   | 2.4169724   | 2.507104    |
| "Pbrm1"    | 9.161854667 | 9.193174    | 9.377998167 | 9.455782333 | 9.294223333 | 9.432514333 | 9.300863667 | 9.487037667 |
| "Pbsn"     | 2.5801423   | 2.7429447   | 2.6234381   | 2.7439742   | 2.6339633   | 2.5812988   | 2.6245086   | 2.734187    |
| "Pbx1"     | 3.358671    | 3.4373865   | 3.4374793   | 3.4736795   | 3.4406264   | 3.4279683   | 3.5146334   | 3.4806685   |
| "Pbx2"     | 4.3100245   | 3.973157733 | 4.280293867 | 4.430476    | 4.605339067 | 4.3035766   | 4.6372643   | 4.473216833 |
| "Pbx3"     | 2.5759418   | 2.5234268   | 2.5850897   | 2.6260817   | 2.5901845   | 2.729649    | 2.5537572   | 2.6322658   |
| "Pbx4"     | 2.547229    | 2.7978995   | 2.5761478   | 2.7429452   | 2.574231    | 2.4692147   | 2.5736706   | 2.6335483   |
| "Pbxip1"   | 10.117827   | 10.340945   | 10.434836   | 10.4291955  | 10.623361   | 10.244358   | 10.3534825  | 10.3129435  |

|           |             |             |             |             |             |             |             |             |
|-----------|-------------|-------------|-------------|-------------|-------------|-------------|-------------|-------------|
| "Pcbd1"   | 8.03105     | 2.747541    | 2.741969    | 2.776346    | 2.733478    | 2.7148821   | 3.2123866   | 2.7717524   |
| "Pcbd2"   | 8.134149    | 6.898657    | 8.295352    | 8.197489    | 7.565907    | 7.0045285   | 8.625216    | 8.049682    |
| "Pcbp1"   | 11.934337   | 12.130041   | 12.081129   | 12.038897   | 11.976675   | 12.211523   | 12.010965   | 11.953228   |
| "Pcbp2"   | 9.5323325   | 9.923593    | 9.9163055   | 9.78777475  | 9.9025535   | 9.79068925  | 9.5052095   | 9.7480025   |
| "Pcbp3"   | 3.5094123   | 4.16595     | 3.8032033   | 4.0095267   | 3.8009138   | 3.6290603   | 3.7968256   | 3.8815162   |
| "Pcbp4"   | 5.548438433 | 5.3065632   | 5.582334533 | 6.232119    | 5.633559633 | 5.2553674   | 5.375253    | 5.896846567 |
| "Pcca"    | 8.291981    | 8.065501    | 8.729246    | 8.72173     | 8.523827    | 8.350026    | 8.685808    | 8.564255    |
| "Pccb"    | 7.266152    | 7.166755    | 7.4946065   | 7.3815327   | 7.5837364   | 7.5278106   | 7.5308123   | 7.7430463   |
| "Pcdh1"   | 2.4139724   | 2.4228213   | 2.39403     | 2.4848497   | 2.4080415   | 2.3599544   | 2.384795    | 2.4986274   |
| "Pcdh12"  | 2.3142662   | 2.3947794   | 2.353073    | 2.416276    | 2.35158     | 2.3278499   | 2.3491895   | 2.4109166   |
| "Pcdh18"  | 2.804520867 | 3.152669267 | 3.788046433 | 3.572332133 | 3.330881033 | 2.969610167 | 3.596286767 | 3.5641398   |
| "Pcdh20"  | 2.9960203   | 3.2341366   | 3.0806477   | 3.2758007   | 3.1114337   | 3.0117948   | 3.0585144   | 3.2079065   |
| "Pcdh7"   | 2.7336483   | 2.997885    | 3.2698574   | 3.0569315   | 3.0039713   | 2.915802    | 2.9354632   | 3.0340488   |
| "Pcdh8"   | 2.3548462   | 2.4449453   | 2.3931603   | 2.509509    | 2.3980794   | 2.3634286   | 2.392961    | 2.489666    |
| "Pcdha1"  | 2.505189    | 2.637621375 | 2.637925675 | 2.695018425 | 2.552458475 | 2.51180065  | 2.55787825  | 2.6775851   |
| "Pcdhb10" | 2.341079    | 2.343603    | 2.3257172   | 2.377434    | 2.3412826   | 2.242414    | 2.3331246   | 2.3703077   |
| "Pcdhb11" | 2.520873    | 2.6426268   | 2.5819118   | 2.7063806   | 2.59402     | 2.5510252   | 2.5932834   | 2.6925867   |
| "Pcdhb14" | 3.1394093   | 3.3827114   | 3.22797355  | 3.4271287   | 3.23928835  | 3.11101915  | 3.20551065  | 3.3376637   |
| "Pcdhb15" | 2.3926554   | 2.4930744   | 2.4330354   | 2.5509014   | 2.4388022   | 2.398357    | 2.4323516   | 2.532876    |
| "Pcdhb16" | 2.4433372   | 2.5529256   | 2.5079033   | 2.6129823   | 2.510812    | 2.4637804   | 2.5076487   | 2.600993    |
| "Pcdhb17" | 2.8309324   | 2.7509058   | 3.730282    | 3.0667534   | 2.9233196   | 2.8200686   | 3.7100844   | 2.9701083   |
| "Pcdhb18" | 2.3312864   | 2.409738    | 2.3653417   | 2.4926426   | 2.3680892   | 2.3250008   | 2.362945    | 2.461771    |
| "Pcdhb2"  | 2.477676    | 2.5706677   | 2.5064206   | 2.6791167   | 2.5082374   | 2.4625578   | 2.5045366   | 2.6023512   |
| "Pcdhb20" | 3.065816    | 3.12134     | 3.3520591   | 3.1630795   | 3.1076314   | 3.0641017   | 3.1057115   | 3.194859    |
| "Pcdhb21" | 1.9649245   | 2.389152    | 1.980818    | 2.0244584   | 2.1056726   | 1.8996973   | 1.9742826   | 2.012543    |
| "Pcdhb22" | 2.7751272   | 3.0224607   | 3.2122743   | 3.126299    | 2.9543378   | 2.8640544   | 2.9354281   | 3.0847101   |
| "Pcdhb3"  | 2.3001742   | 2.3970175   | 2.3459058   | 2.4421582   | 2.3467696   | 2.298603    | 2.346731    | 2.429041    |
| "Pcdhb5"  | 2.662642    | 2.8585281   | 2.982291    | 2.8069818   | 2.8820143   | 2.7466571   | 2.7926958   | 2.8349993   |
| "Pcdhb7"  | 2.4484046   | 2.5323582   | 2.4752786   | 2.5941887   | 2.4888077   | 2.4391863   | 2.5942943   | 2.583599    |
| "Pcdhb9"  | 2.561574    | 2.6693447   | 2.6224046   | 2.7685409   | 2.6252065   | 2.5622995   | 2.6186373   | 2.742454    |
| "Pcdhga1" | 5.5522165   | 5.6195793   | 5.7844653   | 5.655387    | 5.859952    | 5.598692    | 5.5297194   | 5.5888815   |
| "Pcf11"   | 7.1814899   | 7.828154    | 6.84145465  | 7.0696783   | 7.3823358   | 7.3863566   | 7.0495255   | 7.186048    |
| "Pcgf1"   | 2.7316265   | 2.7743516   | 2.7427378   | 2.8399832   | 2.7456427   | 2.7072325   | 2.7322876   | 2.8335328   |
| "Pcgf2"   | 2.5864209   | 2.73847065  | 2.675527    | 2.83581295  | 2.68421105  | 2.601596    | 2.6635876   | 2.8389895   |
| "Pcgf6"   | 3.6144864   | 4.120563767 | 3.544729367 | 3.7329133   | 3.685918567 | 3.705139533 | 3.5109432   | 3.730466367 |
| "Pcid2"   | 3.6972749   | 4.3497601   | 3.3701997   | 3.88954385  | 3.6920185   | 4.13188205  | 3.8681941   | 3.47882815  |
| "Pck1"    | 6.8435244   | 4.6203889   | 4.8446982   | 3.51739     | 6.468743    | 6.681095    | 5.95907325  | 4.8760023   |
| "Pck2"    | 3.8144523   | 4.06426435  | 3.75047245  | 3.5710426   | 4.3758363   | 4.87541285  | 4.90285106  | 3.7658053   |
| "Pcm1"    | 5.16021362  | 5.60986888  | 5.91288394  | 6.08819582  | 5.57317558  | 5.25814904  | 5.69041666  | 6.09562     |
| "Pcmt1"   | 9.0728225   | 9.609833    | 9.260132525 | 9.539644075 | 9.16904235  | 8.997808425 | 9.39183905  | 9.24431     |
| "Pcmtd1"  | 8.236709433 | 8.117259867 | 8.8456968   | 8.925487333 | 8.6479719   | 8.445327667 | 8.564138433 | 9.036128333 |
| "Pcmtd2"  | 9.1110405   | 9.7747445   | 9.2814075   | 9.6601015   | 9.66168     | 9.54078     | 9.082187    | 10.09655125 |
| "Pcna"    | 10.203388   | 10.071892   | 9.875537    | 9.610068    | 10.093799   | 10.394155   | 10.05781    | 9.658424    |
| "Pcnp"    | 9.624988    | 9.972754    | 10.00290875 | 9.976123    | 9.7891475   | 9.98134475  | 9.8459295   | 10.058584   |
| "Pcnx"    | 6.70501615  | 6.94572065  | 6.15932015  | 6.6210468   | 6.6316677   | 6.6815688   | 6.57373545  | 6.6207221   |
| "Pcnx13"  | 5.9462843   | 6.325721    | 6.0865526   | 5.7007113   | 6.1145267   | 6.6347713   | 6.085798    | 6.0757074   |
| "Pcolce"  | 7.755743    | 6.02231575  | 10.48884125 | 8.95835915  | 8.601737    | 7.17886025  | 8.9140495   | 9.22130875  |
| "Pcolce2" | 6.915679    | 6.339146    | 9.095035    | 7.8565707   | 8.757689    | 8.60318     | 7.3688555   | 8.369158    |
| "Pcp2"    | 2.4875753   | 2.59241885  | 2.535777    | 2.6379317   | 2.5388765   | 2.487208    | 2.5291253   | 2.63619755  |
| "Pcp4"    | 2.7348998   | 2.7732321   | 2.7605698   | 2.79856     | 2.9644835   | 2.7631338   | 2.758136    | 2.7850063   |
| "Pcp411"  | 7.7870183   | 5.7541165   | 7.2798343   | 8.327704    | 6.4257655   | 6.4032173   | 6.4308205   | 8.595696    |
| "Pcsk4"   | 2.759432    | 2.9039006   | 2.8093035   | 2.8916383   | 3.0159893   | 2.721785    | 2.7897074   | 3.014455    |
| "Pcsk5"   | 3.3200386   | 3.09255055  | 3.5275009   | 3.1753692   | 3.7149702   | 3.977862    | 2.8964794   | 3.45146645  |
| "Pcsk6"   | 6.612576    | 3.9500828   | 6.105752    | 5.809922    | 5.553224    | 4.9873915   | 5.084797    | 5.44039     |
| "Pcsk7"   | 5.623226    | 6.006929    | 5.4241614   | 5.6382117   | 6.170793    | 5.615381    | 5.624509    | 5.392501    |
| "Pctp"    | 2.8303302   | 2.8745822   | 2.8433479   | 3.0750999   | 2.8484161   | 2.8032012   | 2.84252765  | 2.93657855  |
| "Pcx"     | 6.29036112  | 6.2978004   | 6.4937005   | 6.815821    | 6.248247    | 6.37495354  | 6.85780374  | 6.49465626  |
| "Pcyox1"  | 6.5378737   | 6.083235    | 7.1084046   | 6.7322183   | 6.4838705   | 6.215173    | 7.0105014   | 6.9322767   |
| "Pcyt1a"  | 6.745888325 | 6.979803375 | 7.120531175 | 7.345386675 | 7.00179635  | 6.5610935   | 7.008439    | 7.32912675  |
| "Pcyt2"   | 8.374294    | 6.273277    | 6.267339    | 6.062827    | 6.780745    | 6.1178894   | 6.640737    | 5.9807973   |
| "Pdap1"   | 8.16233315  | 8.3996188   | 8.37073615  | 8.3245907   | 8.154242    | 8.1857025   | 8.2962193   | 8.4035558   |
| "Pdc"     | 2.5967703   | 2.726767    | 2.876161    | 2.8310418   | 2.6313472   | 2.60685     | 2.646584    | 2.7610278   |
| "Pdcd1"   | 2.444403    | 2.5493364   | 2.4997811   | 2.6128483   | 2.498426    | 2.4464865   | 2.4924228   | 2.602301    |
| "Pdcd10"  | 7.288207    | 7.87543235  | 7.73788915  | 7.79927375  | 7.5342911   | 7.71252985  | 7.4038475   | 7.644368    |
| "Pdcd2"   | 8.0703535   | 8.318561    | 7.8133307   | 8.185591    | 8.310422    | 8.046882    | 8.098002    | 8.096118    |
| "Pdcd21"  | 7.3677678   | 7.5224932   | 8.16886815  | 8.31890935  | 7.7736615   | 7.54954925  | 7.9951035   | 8.2353225   |
| "Pdcd4"   | 8.083688    | 7.7283206   | 8.29393     | 8.098313    | 8.381498    | 8.78241     | 8.82544     | 8.392665    |
| "Pdcd6"   | 9.536596    | 8.866001    | 8.612882    | 8.614206    | 9.137208    | 9.080507    | 8.675122    | 8.710438    |
| "Pdcd6ip" | 4.95713968  | 4.92535166  | 4.93018164  | 4.96440854  | 5.0248692   | 5.12700926  | 4.8860004   | 5.1055369   |
| "Pdcd7"   | 6.9296565   | 8.316948    | 7.461431    | 7.8511615   | 7.5465455   | 8.259484    | 7.0068564   | 7.4135146   |
| "Pdcl"    | 6.65425725  | 6.54891755  | 7.2125523   | 7.45859575  | 7.1893703   | 6.70123165  | 7.07603485  | 7.5412257   |
| "Pdcl2"   | 2.900332    | 3.1405644   | 2.9621928   | 3.155882    | 2.9780133   | 2.8949797   | 2.9619436   | 3.0978217   |
| "Pdcl3"   | 10.29036    | 10.457988   | 10.603778   | 10.705486   | 10.526717   | 10.217081   | 11.023971   | 10.640402   |
| "Pde10a"  | 2.42032535  | 2.49862145  | 2.48597365  | 2.580382    | 2.49458585  | 2.6157119   | 2.4783369   | 2.5582224   |
| "Pde12"   | 6.4572406   | 6.4615097   | 6.049027    | 6.352771    | 6.1478863   | 6.104783    | 6.2618318   | 6.64699     |
| "Pde1a"   | 4.207402    | 4.8872833   | 4.3280625   | 4.3372498   | 5.493255    | 5.8525915   | 4.736385    | 4.619287    |
| "Pde1b"   | 2.2353852   | 2.3328857   | 2.3235006   | 2.3532772   | 2.4458141   | 2.8270957   | 2.321384    | 2.3683121   |
| "Pde1c"   | 2.66064075  | 2.79786145  | 2.7034125   | 2.85534885  | 2.71314025  | 2.6487956   | 2.7023153   | 2.8347625   |
| "Pde2a"   | 5.7862415   | 6.2368364   | 5.7421527   | 5.7766356   | 6.5479374   | 7.086809    | 6.117482    | 5.893815    |
| "Pde3a"   | 2.331821    | 2.4009662   | 2.3520527   | 2.4596355   | 2.358302    | 2.32741     | 2.3483791   | 2.4350998   |
| "Pde4b"   | 10.783598   | 10.269751   | 8.483104    | 8.305121    | 7.69335785  | 8.4951275   | 8.3277785   | 8.209675    |

|            |             |             |             |             |             |             |             |             |
|------------|-------------|-------------|-------------|-------------|-------------|-------------|-------------|-------------|
| "Pde4dip"  | 11.90140325 | 12.8952815  | 12.0620355  | 11.9414002  | 12.1161205  | 12.2445375  | 11.7632685  | 11.829749   |
| "Pde6a"    | 2.3869445   | 2.4911475   | 2.4301505   | 2.545705    | 2.4474435   | 2.3869445   | 2.4290826   | 2.52043     |
| "Pde6b"    | 2.5683815   | 2.679665    | 2.639321    | 2.7701983   | 2.6382325   | 2.5990407   | 2.5877295   | 2.7261665   |
| "Pde6c"    | 2.4423945   | 2.520896    | 2.4828186   | 2.591355    | 2.481612    | 2.4201572   | 2.4835236   | 2.569748    |
| "Pde6d"    | 7.4435797   | 7.1932287   | 8.440408    | 8.343346    | 7.6716337   | 7.1085954   | 8.258341    | 8.394867    |
| "Pde6g"    | 2.8130293   | 3.306534    | 2.9080124   | 3.4751263   | 2.9121044   | 2.9005969   | 2.906422    | 2.9657762   |
| "Pde6h"    | 2.49344135  | 2.61137305  | 2.5907436   | 2.68634585  | 2.58129345  | 2.54361345  | 2.58845985  | 2.6587877   |
| "Pde7a"    | 8.028882925 | 9.59360575  | 7.032785775 | 7.548287    | 8.65356     | 8.65558825  | 6.80798285  | 7.965314475 |
| "Pde8a"    | 6.27949265  | 5.04205635  | 5.48372435  | 5.2271803   | 5.7585877   | 5.5191251   | 5.8732669   | 5.5932846   |
| "Pde9a"    | 2.2993948   | 2.3600812   | 2.2959142   | 2.4159505   | 2.3323443   | 2.3390663   | 2.312868    | 2.4091973   |
| "Pdf"      | 8.197857    | 8.306589    | 8.975776    | 9.021593    | 8.375713    | 8.006283    | 8.857814    | 8.823559    |
| "Pdgfa"    | 6.4001823   | 6.5152843   | 7.94473965  | 8.130397    | 7.02958275  | 6.6754615   | 7.507142    | 7.7345573   |
| "Pdgfb"    | 3.71233915  | 4.3954296   | 4.24222825  | 4.3973627   | 4.11265025  | 4.183654    | 4.70314705  | 4.09555015  |
| "Pdgfc"    | 5.0312803   | 4.53794285  | 5.2778592   | 4.61168615  | 5.59442415  | 5.2494565   | 5.33031975  | 4.942727    |
| "Pdgfd"    | 2.6337214   | 2.7259982   | 2.6582189   | 2.7673745   | 2.6603727   | 2.6301088   | 2.633171    | 2.7627563   |
| "Pdgfra"   | 5.42614385  | 4.9642942   | 5.59129135  | 5.30317365  | 5.8441106   | 5.48663     | 5.54369775  | 5.4905975   |
| "Pdgfrb"   | 7.34495585  | 7.4143685   | 7.495417    | 7.750275    | 7.56187185  | 7.53736385  | 7.4598645   | 8.082659    |
| "Pdha1"    | 10.8659845  | 10.5106065  | 10.897682   | 11.1089905  | 11.1067765  | 10.81264    | 11.0268785  | 11.188061   |
| "Pdhb"     | 9.4637578   | 9.5742673   | 9.986578    | 10.2392625  | 9.90704775  | 9.4999925   | 9.83103115  | 10.08931885 |
| "Pdla3"    | 9.05813     | 7.9564734   | 9.160844    | 8.233002    | 8.622125    | 8.879848    | 8.855302    | 8.522161    |
| "Pdla4"    | 6.2492704   | 4.4110026   | 6.230028    | 5.6658463   | 6.0995946   | 6.4932027   | 6.207542    | 6.1541758   |
| "Pdla5"    | 7.4953666   | 4.7815585   | 6.024725    | 5.616629    | 5.468311    | 5.6640315   | 5.9672623   | 5.410059    |
| "Pdla6"    | 8.150824    | 7.148769    | 8.397505    | 7.829576    | 7.7533636   | 7.9577856   | 8.482941    | 8.118291    |
| "Pdik1l"   | 3.152571667 | 3.7909414   | 3.795731467 | 3.745278367 | 3.823096    | 4.321198933 | 3.665302167 | 3.777715133 |
| "Pdk1"     | 6.69432595  | 6.6046885   | 7.47295565  | 7.528384    | 7.66743525  | 6.67420785  | 7.70807535  | 7.86534575  |
| "Pdk2"     | 7.445928    | 7.9281936   | 7.8512197   | 8.390754    | 7.90913     | 7.4538655   | 7.948003    | 8.187841    |
| "Pdk3"     | 2.2712882   | 2.3591695   | 2.3323894   | 2.3662877   | 2.3149297   | 2.4749694   | 2.332125    | 2.3635218   |
| "Pdk4"     | 13.625732   | 14.397518   | 11.081059   | 11.816776   | 14.204752   | 14.30568    | 11.012102   | 12.775722   |
| "Pdlim1"   | 9.892689    | 7.8432593   | 8.774985    | 9.159634    | 9.155998    | 8.246512    | 9.5060425   | 9.678741    |
| "Pdlim2"   | 3.8107965   | 3.7361646   | 4.446556    | 3.788844    | 4.556782    | 4.8322287   | 3.6462228   | 4.3299727   |
| "Pdlim3"   | 12.895747   | 13.008902   | 13.192168   | 13.121018   | 12.809825   | 12.826148   | 13.278225   | 12.842086   |
| "Pdlim4"   | 5.4066467   | 4.5466766   | 6.7779903   | 5.683193    | 5.90257     | 5.254523    | 6.311784    | 5.6369467   |
| "Pdlim5"   | 7.298149267 | 7.355155233 | 7.008261833 | 7.054454867 | 7.351183233 | 7.549735717 | 7.023018867 | 7.141749083 |
| "Pdlim7"   | 8.3616365   | 9.05721175  | 9.7770132   | 9.37279985  | 9.1121275   | 8.78150125  | 9.2264905   | 9.6893012   |
| "Pdpk1"    | 9.358373    | 9.803563    | 8.663532    | 8.6508215   | 9.194545    | 9.553766    | 8.730453    | 8.7362295   |
| "Pdpn"     | 6.525571    | 4.413626    | 6.607396    | 5.8377824   | 6.1973047   | 4.9112043   | 6.9739714   | 5.852876    |
| "Pdrg1"    | 5.9058098   | 6.1394129   | 6.172317725 | 6.202715325 | 6.005370525 | 5.96020385  | 6.022661425 | 6.2170638   |
| "Pds5a"    | 5.6339316   | 5.2651734   | 5.6048126   | 5.641506    | 5.926213    | 6.0394287   | 5.649314    | 5.7305756   |
| "Pdss1"    | 5.8316336   | 6.487959    | 6.255613    | 7.018136    | 6.2514024   | 5.6680493   | 6.14347     | 6.739383    |
| "Pdx1"     | 2.7179751   | 3.6913137   | 7.825746    | 3.0559058   | 3.0729272   | 2.824883    | 2.8515825   | 2.9399948   |
| "Pdxcl1"   | 4.6968035   | 4.631417425 | 4.5150799   | 4.641847125 | 4.5518194   | 4.599250225 | 4.7965574   | 4.8449412   |
| "Pdxk"     | 4.62704735  | 3.38631105  | 4.08786575  | 4.16484205  | 4.27416815  | 4.01219985  | 4.4298141   | 4.0426471   |
| "Pdxp"     | 2.3410447   | 2.448429    | 2.6873922   | 2.5954764   | 2.3716383   | 2.4044654   | 2.5182624   | 2.4936857   |
| "Pdzd11"   | 5.3106265   | 4.1432486   | 5.453903    | 5.2950783   | 5.2551823   | 4.6632004   | 5.542898    | 4.879651    |
| "Pdzk1"    | 3.2719872   | 2.2459478   | 2.2327929   | 2.2969866   | 2.2300894   | 2.2054715   | 2.234128    | 2.286851    |
| "Pdzk1ip1" | 2.3132205   | 2.3598033   | 2.8540883   | 2.4117006   | 2.3297629   | 2.29677055  | 2.3157301   | 2.40204765  |
| "Pdzrn3"   | 9.933522    | 9.622543    | 10.92229    | 11.220879   | 10.566733   | 9.618569    | 10.932811   | 11.383379   |
| "Pea15a"   | 5.8483002   | 5.13619135  | 6.92156515  | 6.5287023   | 6.19072665  | 5.861365    | 6.8002365   | 6.6412091   |
| "Pear1"    | 5.7124653   | 6.237669    | 5.472968    | 5.8241415   | 5.892952    | 5.7423487   | 5.45437     | 5.845376    |
| "Pebp1"    | 11.9928605  | 12.310455   | 12.502188   | 12.433306   | 12.1558665  | 12.104952   | 12.360237   | 12.373945   |
| "Pecam1"   | 6.8608665   | 6.5485034   | 5.9138      | 5.827588    | 7.044061    | 7.51595     | 6.248578    | 6.286835    |
| "Pecr"     | 5.6026386   | 5.3949808   | 5.63546525  | 5.82730935  | 5.4629239   | 5.0224038   | 5.6489751   | 5.57373675  |
| "Pef1"     | 7.2443094   | 8.00078     | 6.8981056   | 7.1796966   | 7.378803    | 7.7947516   | 7.0952005   | 7.009687    |
| "Peg10"    | 2.7091405   | 2.8216138   | 2.7741683   | 2.8796782   | 2.785834    | 2.7184327   | 2.7735775   | 2.9160607   |
| "Peg12"    | 2.9914842   | 3.2848773   | 3.177314    | 3.331249    | 3.1470807   | 3.044948    | 3.14599     | 3.285679    |
| "Peg3"     | 9.936866    | 9.755274    | 7.070211933 | 4.823663033 | 10.41971    | 10.29996767 | 7.621857467 | 6.431924    |
| "Peli1"    | 7.75905125  | 8.334621    | 6.9582325   | 7.4327583   | 7.6519797   | 8.9356625   | 6.98608415  | 7.54670885  |
| "Peli2"    | 3.8049238   | 3.834943    | 3.8143027   | 3.9310553   | 3.7215009   | 3.877181    | 3.8122716   | 3.7576087   |
| "Pelo"     | 5.1552653   | 6.232437    | 5.8059325   | 5.840834    | 6.094613    | 7.002189    | 5.4621677   | 5.7987175   |
| "Pelp1"    | 6.627414    | 7.370264    | 6.667045    | 6.9585886   | 7.1063976   | 6.7739816   | 6.3597245   | 6.764451    |
| "Pemt"     | 3.5603013   | 2.0741115   | 2.0511804   | 2.110365    | 2.053401    | 2.0403757   | 2.5456688   | 2.1094418   |
| "Penk"     | 6.3378673   | 7.007293    | 5.2766585   | 5.803663    | 6.3236127   | 6.9939795   | 5.7331314   | 5.7334867   |
| "Pepd"     | 7.743701    | 7.8523364   | 8.306371    | 8.047729    | 8.031904    | 7.8252087   | 8.395186    | 7.971987    |
| "Per1"     | 9.093286    | 9.84437     | 8.336492    | 8.129342    | 9.43478     | 9.022486    | 8.650209    | 8.4291      |
| "Per2"     | 4.590657    | 6.3159003   | 5.850646    | 6.044304    | 6.7189465   | 5.586219    | 6.1070166   | 6.524331    |
| "Per3"     | 3.08311795  | 4.0233915   | 5.4528706   | 5.3909603   | 5.39614505  | 4.13747855  | 5.40684625  | 5.5545172   |
| "Perp"     | 7.1319586   | 6.989181    | 8.243906    | 3.4608836   | 6.5719852   | 7.115221    | 5.5414085   | 4.050685    |
| "Pes1"     | 5.454737    | 5.85325225  | 5.09533265  | 5.22041035  | 5.36913895  | 5.597865    | 5.09308615  | 5.21724635  |
| "Pet112l"  | 6.823904    | 6.6827154   | 6.902261    | 7.1290755   | 7.0070677   | 6.9840817   | 7.304313    | 7.020294    |
| "Pex11a"   | 6.8379295   | 5.64258095  | 6.8547151   | 7.37713965  | 7.0328384   | 6.6646714   | 7.6051985   | 7.5157034   |
| "Pex11b"   | 4.88983485  | 5.36732125  | 4.6821848   | 4.70644865  | 5.0815662   | 5.24911345  | 4.754292    | 4.73998055  |
| "Pex12"    | 8.1233225   | 8.486606    | 7.51984     | 7.8649597   | 8.084103    | 8.575046    | 8.097778    | 7.837254    |
| "Pex13"    | 5.75004965  | 5.7949832   | 5.57018835  | 5.5489052   | 6.210057    | 5.96167265  | 5.9633353   | 5.99768735  |
| "Pex14"    | 6.3030715   | 6.749389    | 6.2867637   | 6.0836167   | 6.451667    | 6.6831346   | 6.4819083   | 6.3783097   |
| "Pex16"    | 5.19115335  | 5.5158281   | 4.75147865  | 4.69128525  | 5.26539175  | 5.494276    | 5.30770515  | 4.8386888   |
| "Pex19"    | 7.24182965  | 7.53045135  | 7.3914881   | 7.5919705   | 7.81714105  | 7.298876    | 7.29343685  | 7.3571672   |
| "Pex26"    | 4.058289    | 3.7740908   | 4.4851007   | 5.062712    | 4.116479    | 3.863061    | 5.159209    | 5.27219     |
| "Pex3"     | 6.736931    | 6.603284    | 6.75859575  | 6.72354605  | 7.29494     | 7.20175125  | 7.07443525  | 6.9627488   |
| "Pex5"     | 4.30558375  | 4.0023829   | 4.19837415  | 4.289788    | 4.47369005  | 4.5967059   | 4.41715165  | 4.2859449   |
| "Pex6"     | 5.45084132  | 5.54209442  | 5.22850876  | 5.09446446  | 5.56454448  | 5.5637146   | 5.45172196  | 5.31680066  |
| "Pex7"     | 9.228428    | 8.645155    | 9.625086    | 9.22777     | 8.952178    | 8.787829    | 9.401568    | 9.117582    |

|            |             |             |             |             |             |             |             |             |
|------------|-------------|-------------|-------------|-------------|-------------|-------------|-------------|-------------|
| "Pf4"      | 7.322723    | 6.0783496   | 9.047641    | 8.1914835   | 8.562956    | 7.896371    | 8.95137     | 8.190902    |
| "Pfdn1"    | 10.702159   | 10.76087    | 11.060626   | 11.23095    | 10.559538   | 10.139848   | 10.771353   | 10.948632   |
| "Pfdn2"    | 9.750995    | 9.963044    | 9.328802    | 9.241844    | 9.370874    | 10.075436   | 9.745325    | 9.1972065   |
| "Pfdn5"    | 6.5396342   | 6.72129292  | 6.5977195   | 6.74875056  | 6.55369986  | 6.43565994  | 6.76472184  | 6.67571924  |
| "Pfkfb1"   | 8.717652    | 10.301744   | 8.675036    | 9.212339    | 9.975852    | 9.671598    | 8.284109    | 9.192141    |
| "Pfkfb2"   | 2.8934102   | 3.0203462   | 2.9397647   | 3.0932455   | 2.9536374   | 2.8987417   | 2.9461167   | 3.061921    |
| "Pfkfb3"   | 9.79504585  | 10.9686085  | 8.3869433   | 8.8370217   | 9.757588    | 9.6411373   | 7.4540235   | 9.0553065   |
| "Pfkf1"    | 2.218454    | 2.2319624   | 2.2208638   | 2.2795184   | 2.225097    | 2.1931305   | 2.4032297   | 2.271019    |
| "Pfkcm"    | 13.203714   | 13.931883   | 14.129244   | 14.036137   | 13.810913   | 13.627662   | 13.727994   | 13.892198   |
| "Pfkcp"    | 5.415057    | 5.1625924   | 5.975325    | 4.679714    | 5.747076    | 6.5477986   | 6.4729776   | 5.3651996   |
| "Pfn1"     | 8.418066    | 7.600783    | 8.749351    | 8.844518    | 7.9478207   | 8.3935585   | 8.741239    | 8.526085    |
| "Pfn2"     | 10.97112867 | 10.91937167 | 12.03590833 | 12.29848467 | 11.49694433 | 10.50179533 | 11.94065967 | 12.229022   |
| "Pfn3"     | 2.4269905   | 2.5214458   | 2.4635086   | 2.5379376   | 2.4541373   | 2.424448    | 2.4618196   | 2.5316367   |
| "Pgamm1"   | 7.8023033   | 6.3065042   | 7.4622803   | 6.8423567   | 7.579753    | 7.647952    | 8.46137     | 7.0522523   |
| "Pgamm2"   | 13.097293   | 13.236608   | 14.686618   | 14.655896   | 13.773829   | 12.887035   | 14.047846   | 14.452362   |
| "Pgamm5"   | 8.732045    | 9.212976    | 8.522236    | 8.82672     | 8.830293    | 9.01805     | 8.545742    | 8.910324    |
| "Pgapp2"   | 6.9838773   | 6.981027867 | 7.561894333 | 8.112781167 | 7.1493849   | 7.0815424   | 7.696269133 | 7.8313451   |
| "Pgcp"     | 5.00746     | 4.4777305   | 5.31288865  | 5.1490605   | 5.1064849   | 5.002028    | 4.9973961   | 5.1529942   |
| "Pgdf"     | 7.936281625 | 6.998537875 | 7.7723508   | 6.825542425 | 7.790795    | 8.5553305   | 9.711689375 | 7.271948775 |
| "Pgf"      | 2.6430852   | 3.4067683   | 3.012938    | 3.1175735   | 3.0143974   | 2.9924896   | 2.9674056   | 3.0699704   |
| "Pkg1"     | 12.324979   | 12.93569    | 12.978061   | 13.11801333 | 12.919078   | 12.899989   | 12.46832167 | 13.05661167 |
| "Pkg2"     | 2.8793015   | 3.0320466   | 2.9716508   | 3.170299    | 2.979282    | 2.9334366   | 2.9426115   | 3.0809188   |
| "Pgl5"     | 7.519825    | 6.666422    | 7.452721    | 7.220386    | 7.239936    | 7.3192596   | 7.9592237   | 6.7538476   |
| "Pglyrp2"  | 4.22932     | 2.1851797   | 2.158026    | 2.220547    | 2.1559525   | 2.1788006   | 2.1505573   | 2.2222173   |
| "Pgm1"     | 3.7016044   | 3.0406075   | 3.1666255   | 3.193313    | 3.3743322   | 3.4778948   | 3.4184282   | 3.1796765   |
| "Pgm2"     | 12.059303   | 12.477945   | 13.243951   | 13.341882   | 12.20966    | 12.021253   | 12.288611   | 12.997404   |
| "Pgp"      | 9.216114    | 10.0711845  | 9.67219     | 10.1120975  | 9.8327245   | 9.444854    | 9.648967    | 9.8892945   |
| "Pgpep1"   | 4.1654987   | 3.4587638   | 4.421174    | 4.188183    | 4.1769943   | 3.359117    | 4.6197743   | 4.23835     |
| "Pgr"      | 2.301787    | 2.3893175   | 2.3300068   | 2.423347    | 2.334132    | 2.2977793   | 2.3290062   | 2.4056995   |
| "Pgrmc1"   | 11.68028    | 8.56072     | 8.968752    | 8.159971    | 9.639303    | 9.590829    | 9.297171    | 8.738888    |
| "Pgrmc2"   | 6.30124045  | 6.445103    | 6.63761755  | 6.3479786   | 6.45368335  | 6.4307649   | 7.1748425   | 6.4943595   |
| "Pgs1"     | 6.536437667 | 7.104002167 | 6.7632066   | 6.694032    | 6.583162033 | 6.784515233 | 6.785822433 | 6.597991467 |
| "Phactr1"  | 2.8743978   | 3.3521144   | 3.6766324   | 3.1791828   | 3.101632    | 2.9470854   | 3.099634    | 3.1776838   |
| "Phactr2"  | 4.3366265   | 6.422313    | 5.6066484   | 5.947966    | 4.8501225   | 5.7006674   | 4.817816    | 5.6878815   |
| "Phax"     | 9.066764    | 9.676685    | 8.625307    | 8.531396    | 9.321442    | 9.413751    | 8.549992    | 8.660657    |
| "Phb2"     | 10.82567867 | 10.803143   | 10.56495833 | 10.47813067 | 10.81433367 | 10.45872167 | 11.07767667 | 10.463443   |
| "Phc1"     | 7.076035    | 7.979955    | 7.404387    | 7.895592    | 7.182095    | 7.150754    | 7.22162     | 7.932019    |
| "Phc2"     | 7.80422435  | 8.2283255   | 6.818192    | 6.88484315  | 7.67033505  | 8.1835575   | 6.90328965  | 6.92936675  |
| "Phex"     | 2.307586    | 2.4382733   | 2.36807295  | 2.52994585  | 2.3688035   | 2.3357259   | 2.3675377   | 2.4672146   |
| "Phf1"     | 4.532591    | 4.57189     | 4.6558456   | 4.043519    | 5.1269007   | 5.2146206   | 5.0508204   | 4.8643417   |
| "Phf10"    | 8.059631    | 8.30384     | 8.993331    | 8.53141     | 8.293966    | 8.397108    | 8.940281    | 8.715193    |
| "Phf12"    | 2.9491904   | 3.165663    | 3.02891     | 3.1327488   | 3.031144    | 2.9971976   | 3.0211954   | 3.1173646   |
| "Phf13"    | 5.3760695   | 5.5332985   | 4.7886195   | 5.180619    | 5.5987473   | 5.393574    | 5.0621843   | 4.8705044   |
| "Phf17"    | 6.873228525 | 7.370773725 | 7.5811491   | 7.877212175 | 7.415382175 | 6.8658919   | 7.810996575 | 7.787920225 |
| "Phf19"    | 2.4324245   | 2.4788795   | 2.457797    | 2.5277877   | 2.4574609   | 2.402322    | 2.457563    | 2.525728    |
| "Phf2"     | 4.250284733 | 4.675618867 | 4.352345433 | 4.4418775   | 4.405092133 | 4.5696002   | 4.4075184   | 4.5016726   |
| "Phf20"    | 6.4998263   | 6.3080578   | 6.72097725  | 6.776759575 | 6.448553975 | 6.394212575 | 6.94324255  | 6.8078699   |
| "Phf20i1"  | 7.42078835  | 8.2341265   | 7.42978815  | 8.1286905   | 7.2762102   | 7.6881857   | 7.629407    | 7.82648515  |
| "Phf21a"   | 6.7774195   | 7.3611541   | 6.9786475   | 6.81748715  | 7.18972805  | 7.10764435  | 6.7789485   | 6.90457865  |
| "Phf23"    | 6.956143    | 6.9455543   | 6.743697    | 6.9855466   | 7.2712917   | 6.989484    | 7.1817284   | 6.8652143   |
| "Phf3"     | 2.568734    | 2.9094599   | 2.6004962   | 2.6723553   | 2.669957167 | 2.601617733 | 2.589055467 | 2.7178932   |
| "Phf5a"    | 9.065908    | 9.425154    | 9.381256    | 9.2686      | 8.9962435   | 9.128134    | 9.286751    | 9.115707    |
| "Phf7"     | 5.1424978   | 5.0458217   | 4.8914274   | 4.9929413   | 4.7284449   | 4.53360515  | 5.36007745  | 4.79279115  |
| "Phf8"     | 4.536586    | 5.070388    | 4.624181    | 4.25183     | 6.013181    | 5.612974    | 4.583697    | 4.704932    |
| "Phgdh"    | 4.6268541   | 4.702322725 | 6.03346165  | 4.490079275 | 6.282198675 | 5.166408025 | 6.387483425 | 5.158959725 |
| "Phgr1"    | 2.591045    | 2.824724    | 2.68807     | 2.7821693   | 2.6529276   | 2.5950673   | 2.6434526   | 2.715205    |
| "Phip"     | 4.883323625 | 5.539450325 | 5.047081825 | 5.122174275 | 5.253220925 | 5.247284925 | 5.16534645  | 5.1986692   |
| "Phka1"    | 10.135882   | 10.87531967 | 11.06665217 | 11.63799983 | 10.34767    | 10.21251133 | 10.172835   | 11.41981433 |
| "Phka2"    | 3.73046575  | 4.2568619   | 4.2781885   | 3.9000386   | 4.3663857   | 4.4157464   | 4.2682684   | 3.92433865  |
| "Phkb"     | 12.103603   | 13.146716   | 13.049774   | 13.28308    | 12.688287   | 12.82661    | 12.523031   | 13.273255   |
| "Phkg1"    | 9.727316    | 10.7011375  | 11.14583775 | 11.2857555  | 10.352827   | 9.84572675  | 10.222779   | 11.165153   |
| "Phkg2"    | 5.8248935   | 6.5945945   | 6.1786127   | 5.87508     | 6.4673743   | 6.4427915   | 5.8753505   | 5.2487      |
| "Phlda1"   | 8.3444195   | 9.28081     | 7.140358    | 6.7121067   | 7.7339034   | 8.986777    | 6.6791077   | 7.0603437   |
| "Phlda3"   | 10.048381   | 10.147662   | 9.856566    | 10.648714   | 10.51308    | 9.398635    | 10.25843    | 10.25825    |
| "Phldb1"   | 4.7966685   | 5.26226835  | 5.43240825  | 5.3903172   | 5.6312581   | 5.2358982   | 5.67619205  | 5.4990435   |
| "Phldb2"   | 6.6656795   | 7.2702746   | 7.5765276   | 7.712301    | 7.125523    | 7.2071443   | 7.281792    | 8.022833    |
| "Phlpp1"   | 7.730051    | 8.148567    | 7.243053    | 7.701456    | 7.6874614   | 7.8308635   | 7.0258145   | 7.717353    |
| "Phospho2" | 6.921374    | 6.982471    | 6.84443285  | 7.038646    | 6.8227358   | 6.66292045  | 7.118329    | 7.0673971   |
| "Phox2a"   | 2.541884    | 2.5826693   | 2.5745187   | 2.6352406   | 2.5755138   | 2.5545764   | 2.5670774   | 2.6442595   |
| "Phox2b"   | 3.0847805   | 3.1057448   | 3.101241    | 3.1487155   | 3.1016738   | 3.0775082   | 3.079917    | 3.1599438   |
| "Phpt1"    | 9.117893    | 9.226866    | 9.691642    | 9.6124735   | 9.056807    | 9.135881    | 9.223288    | 9.500667    |
| "Phft1"    | 4.012572    | 4.087829    | 4.6125164   | 4.2856045   | 4.3122125   | 4.5692954   | 3.9926798   | 4.2784586   |
| "Phft2"    | 10.404219   | 10.628939   | 11.473359   | 11.536939   | 10.938235   | 10.465102   | 11.205586   | 11.673528   |
| "Phxr1"    | 3.6014097   | 3.0186453   | 3.1028504   | 3.0437198   | 3.2991714   | 3.486518    | 3.8457234   | 3.1045358   |
| "Phxr2"    | 2.41974     | 2.49639     | 2.4449954   | 2.5460556   | 2.4543502   | 2.3984828   | 2.448765    | 2.5454836   |
| "Phxr4"    | 3.9029577   | 4.3205876   | 4.265892    | 4.210941    | 4.2684574   | 5.2231216   | 4.261149    | 4.3168216   |
| "Phxr5"    | 3.7049937   | 4.588172    | 4.8042707   | 4.004703    | 3.8316736   | 3.607484    | 3.8165588   | 3.7220266   |
| "Phyh"     | 11.97855    | 9.821836    | 10.466625   | 10.785082   | 10.677839   | 10.57745    | 10.426823   | 10.956675   |
| "Phyhip"   | 2.9786627   | 3.2490015   | 3.07181335  | 3.25280835  | 3.1134433   | 3.00506485  | 3.0638659   | 3.19502855  |
| "Pi15"     | 2.6268015   | 2.8643937   | 2.6506238   | 2.7347307   | 2.6538644   | 2.6232314   | 2.649945    | 2.7309852   |
| "Pi16"     | 6.3436084   | 4.0299664   | 7.6970105   | 6.850715    | 6.8138666   | 6.313917    | 6.448239    | 7.2827916   |

|            |             |             |             |             |             |             |             |             |
|------------|-------------|-------------|-------------|-------------|-------------|-------------|-------------|-------------|
| "Pi4k2a"   | 7.7814932   | 8.8771775   | 5.8062945   | 5.4401295   | 7.21099575  | 7.7061985   | 5.9278448   | 5.58717     |
| "Pi4k2b"   | 4.0690783   | 3.488896833 | 3.0674755   | 3.0578187   | 3.535724067 | 3.694636833 | 3.029554633 | 3.175334233 |
| "Pi4ka"    | 5.2266274   | 5.92799815  | 5.2194777   | 4.9984905   | 5.2772637   | 5.72123505  | 5.1350688   | 5.04565235  |
| "Pias1"    | 5.592045    | 6.155912833 | 5.594677967 | 5.8407759   | 5.806023667 | 6.0650237   | 5.443031667 | 5.7833611   |
| "Pias2"    | 6.4568635   | 6.640561    | 6.5876185   | 7.13288935  | 6.447535    | 6.2772635   | 6.9841162   | 6.58990095  |
| "Pias3"    | 2.7384398   | 3.0507455   | 3.32085015  | 3.1497268   | 3.0334871   | 3.17543435  | 2.99612915  | 3.3498894   |
| "Pias4"    | 4.2633295   | 5.134226    | 4.287208    | 4.352099    | 4.9351406   | 5.157398    | 4.796327    | 3.8137887   |
| "Pibf1"    | 2.723786    | 2.8299065   | 2.7785823   | 2.8980763   | 2.8062224   | 2.736276    | 2.7927575   | 2.8682687   |
| "Picalm"   | 12.299664   | 12.989273   | 11.341164   | 11.221515   | 12.351863   | 12.646228   | 11.2691555  | 11.484363   |
| "Pick1"    | 7.575716    | 8.044565    | 7.6416674   | 7.7823877   | 7.6389174   | 7.401288    | 7.4366612   | 7.731051    |
| "Piga"     | 6.3211403   | 6.34233     | 3.404931    | 4.2987065   | 5.130245    | 5.563551    | 4.3892875   | 4.5399942   |
| "Pigb"     | 2.471837    | 2.5503654   | 2.4884543   | 2.6181264   | 2.5001392   | 2.4654937   | 2.5033152   | 2.5985224   |
| "Pigc"     | 4.72204565  | 5.1834482   | 5.0426637   | 5.02910475  | 5.16230465  | 5.24350565  | 4.9232355   | 4.8537745   |
| "Pigf"     | 5.5791674   | 3.998013    | 4.2386565   | 4.37995     | 4.242405    | 4.802626    | 4.565636    | 4.875238    |
| "Pigh"     | 3.6146002   | 3.9874656   | 4.1644793   | 3.6365747   | 3.6728368   | 3.8356946   | 3.9454327   | 4.0866246   |
| "Pigk"     | 3.653747    | 3.7468718   | 3.9843885   | 4.006279667 | 3.8487038   | 3.463308167 | 3.744297867 | 4.052209133 |
| "Pigm"     | 2.4057038   | 2.4753923   | 2.4299269   | 2.476234    | 2.5409846   | 3.507446    | 2.5459032   | 2.5315924   |
| "Pigo"     | 5.645443767 | 5.622675667 | 5.7875249   | 5.8202937   | 5.844057967 | 5.492483567 | 5.6542189   | 5.828894567 |
| "Pigp"     | 11.198424   | 11.4721985  | 11.732267   | 11.623885   | 11.325085   | 10.944782   | 11.773404   | 11.606007   |
| "Pigq"     | 6.2624252   | 6.33768262  | 6.7432226   | 6.7747034   | 6.61284998  | 6.69838856  | 6.9737226   | 6.73085326  |
| "Pigr"     | 8.98830325  | 2.3650502   | 2.3613253   | 2.418833    | 2.3592859   | 2.32161295  | 2.3440604   | 2.523764    |
| "Pigs"     | 2.3692992   | 2.1979244   | 2.371557    | 2.4212692   | 2.341601    | 2.3177063   | 2.3975646   | 3.0816102   |
| "Pigt"     | 3.100951    | 3.124683    | 3.2234795   | 3.1588068   | 3.11709     | 3.0943975   | 3.1182184   | 3.1594481   |
| "Pigu"     | 5.484253567 | 5.473792333 | 5.205606567 | 5.246587567 | 5.298787267 | 4.9714901   | 5.0627238   | 5.281496867 |
| "Pigx"     | 4.8529315   | 4.423263    | 5.0041881   | 5.07920365  | 4.7911802   | 4.52018095  | 5.00324725  | 4.96421315  |
| "Pigy1"    | 7.375076    | 7.1761246   | 7.7044377   | 7.932881    | 7.2962832   | 7.2024536   | 7.802559    | 7.917915    |
| "Pih1d1"   | 7.9331007   | 7.6580157   | 8.331647    | 8.152287    | 7.85419     | 7.400635    | 8.303713    | 8.118025    |
| "Pik3c2a"  | 5.04377775  | 4.83353445  | 4.7868805   | 4.78337235  | 5.00126285  | 4.9912691   | 4.81062045  | 4.7850689   |
| "Pik3c2g"  | 2.42889     | 2.4821024   | 2.4465475   | 2.5613787   | 2.4477634   | 2.4242253   | 2.4451156   | 2.5587752   |
| "Pik3c3"   | 6.3683186   | 7.0240417   | 5.9873524   | 6.4826837   | 6.610798    | 6.7879343   | 6.1144137   | 6.9730034   |
| "Pik3ca"   | 9.739359    | 9.607524    | 8.38378465  | 8.45223485  | 8.8098235   | 9.9133255   | 8.12280915  | 8.650892    |
| "Pik3cd"   | 3.1113186   | 2.8774555   | 3.7623413   | 4.046042    | 3.041956    | 3.6876688   | 3.3499696   | 3.6443832   |
| "Pik3cg"   | 2.1459982   | 2.1713688   | 2.1674187   | 2.257759    | 2.1722758   | 2.9690456   | 2.16739     | 2.2161644   |
| "Pik3r1"   | 6.6139379   | 8.016763467 | 5.810802333 | 5.708060333 | 7.088167433 | 6.218396067 | 6.440241867 | 5.584654267 |
| "Pik3r2"   | 4.185286    | 4.1828876   | 4.1955304   | 4.3599567   | 4.495392    | 4.044002    | 4.184964    | 4.2236385   |
| "Pik3r4"   | 6.787807    | 6.7343135   | 6.764735    | 6.891959    | 6.8969803   | 6.811616    | 6.69544     | 7.41774     |
| "Pikfyve"  | 2.3820794   | 2.4405723   | 2.408375    | 2.4938705   | 2.409495    | 2.378856    | 2.4055326   | 2.4950256   |
| "Pilra"    | 4.5682425   | 3.7495768   | 3.562341    | 3.6093054   | 3.646968    | 3.4315991   | 3.5777557   | 3.6467931   |
| "Pilrb1"   | 3.42521     | 2.2167199   | 2.263456    | 2.260383    | 2.2070177   | 2.1895232   | 2.2033823   | 2.2679563   |
| "Pim1"     | 8.492477    | 8.0338518   | 5.3420475   | 5.17505095  | 6.3779173   | 6.79861935  | 6.293842    | 6.0197455   |
| "Pim2"     | 2.3640568   | 2.4921827   | 2.5575056   | 2.5088267   | 2.515699    | 2.5432997   | 2.4082973   | 2.5382245   |
| "Pim3"     | 7.9115597   | 8.135561667 | 5.9998992   | 6.085746167 | 7.692638467 | 7.869574267 | 6.6196893   | 6.4427193   |
| "Pin1"     | 9.398296    | 9.768974    | 9.976109    | 9.908029    | 9.609404    | 9.360066    | 9.85661     | 9.8014965   |
| "Pink1"    | 12.784977   | 13.505562   | 13.363239   | 13.162241   | 13.03276    | 12.870576   | 12.944844   | 13.401383   |
| "Pinx1"    | 4.1953363   | 5.3008313   | 4.350928    | 4.0806212   | 4.474882    | 5.1604795   | 4.3507915   | 4.0179596   |
| "Pip"      | 2.4993885   | 2.6176054   | 2.5504935   | 2.683179    | 2.5585399   | 2.503854    | 2.5501087   | 2.6665373   |
| "Pip4k2a"  | 5.07329     | 4.16795875  | 5.0374202   | 4.55109215  | 5.11610985  | 6.2021565   | 5.30614665  | 4.8528587   |
| "Pip4k2b"  | 2.8118875   | 3.0185833   | 2.9028065   | 3.0834432   | 2.9149497   | 2.9356217   | 2.8957675   | 3.0244117   |
| "Pip4k2c"  | 4.31398345  | 4.5323298   | 4.1735382   | 3.9960726   | 4.19938035  | 4.33719895  | 4.07743895  | 4.059441    |
| "Pip5k1a"  | 5.4755443   | 5.8538753   | 5.31513425  | 5.5382399   | 5.466203875 | 5.5988265   | 5.016171725 | 5.430730175 |
| "Pip5k1b"  | 2.9727376   | 3.0973377   | 2.9902816   | 3.1610236   | 3.0011346   | 2.923365    | 3.00076     | 3.0648687   |
| "Pip5k1c"  | 3.31853795  | 3.58339505  | 3.441103    | 3.51015335  | 3.43134605  | 3.35595955  | 3.35625255  | 3.39307505  |
| "Pipox"    | 6.0598087   | 1.8935056   | 1.8788048   | 1.9265537   | 1.8768171   | 1.8768523   | 1.8768525   | 1.928244    |
| "Pira1"    | 4.59978     | 2.9139888   | 2.898065    | 2.9511526   | 2.8723145   | 3.0244436   | 3.0074263   | 2.9207957   |
| "Pira2"    | 2.7383084   | 3.0072002   | 2.8184862   | 3.0044498   | 2.8243842   | 2.7356875   | 2.806483    | 2.9580548   |
| "Pisd-ps1" | 5.1152795   | 4.947388    | 5.657484033 | 5.4138513   | 5.256048833 | 5.348042933 | 5.9430011   | 5.703427533 |
| "Pisd-ps3" | 6.3384145   | 6.0267523   | 7.1022488   | 6.692639    | 6.4075565   | 6.7591213   | 7.19353605  | 7.1151545   |
| "Pisd"     | 6.978644    | 7.107248    | 7.749563    | 7.25363     | 7.1505275   | 7.1847467   | 7.6790776   | 7.509314    |
| "Pitpna"   | 8.13274465  | 8.791002    | 9.0451635   | 9.2951285   | 7.9815675   | 8.31815675  | 8.446176    | 8.4026085   |
| "Pitpnb"   | 3.76804325  | 3.7344635   | 3.64160685  | 3.6622517   | 3.72856055  | 3.73260475  | 3.668023    | 3.87011005  |
| "Pitpncl1" | 6.331842525 | 5.4518444   | 7.5902248   | 7.646516975 | 7.015242025 | 5.980617938 | 6.8196617   | 7.776917113 |
| "Pitpnm1"  | 3.906561425 | 3.87756325  | 4.030175825 | 3.7892164   | 4.077667575 | 4.4851003   | 4.200872225 | 3.890642875 |
| "Pitpnm2"  | 2.5128996   | 2.56646135  | 2.54059375  | 2.6311779   | 2.5397539   | 2.50610045  | 2.5552888   | 2.62479985  |
| "Pitrm1"   | 6.95092295  | 7.3914045   | 6.9813721   | 7.2800407   | 7.13155085  | 7.12559685  | 7.034598    | 7.460689    |
| "Pitx2"    | 4.7992645   | 4.28895665  | 5.6324677   | 5.3588791   | 7.106496    | 5.49411885  | 5.505229    | 6.2721783   |
| "Piwil1"   | 2.418973    | 2.5651982   | 2.531638    | 2.6182096   | 2.5328102   | 2.5105445   | 2.5377932   | 2.6138308   |
| "Piwil2"   | 2.513155    | 2.6105433   | 2.7389393   | 2.6873484   | 2.5603807   | 2.5003476   | 2.5741863   | 2.6696224   |
| "Pja1"     | 4.955816125 | 5.0146702   | 5.231293925 | 5.2712483   | 5.21007875  | 4.8165641   | 5.27374715  | 5.242717    |
| "Pja2"     | 7.5216755   | 7.607447433 | 8.279271867 | 8.624497167 | 7.816283333 | 6.904131833 | 8.2070661   | 8.400453    |
| "Pkd1"     | 4.074445    | 4.0855865   | 4.0877037   | 4.1432123   | 4.2952356   | 4.73769     | 4.072482    | 4.1569166   |
| "Pkd2"     | 7.452299    | 7.3944044   | 8.139818    | 7.6825852   | 7.961026    | 8.106239    | 7.4688997   | 8.060829    |
| "Pkd2l2"   | 3.0410593   | 3.111044    | 3.0523858   | 3.1759975   | 2.795627    | 2.953668    | 4.1521535   | 3.106175    |
| "Pkdcc"    | 6.3744444   | 6.7774458   | 6.8991025   | 9.345988    | 7.40164785  | 6.3150511   | 8.1129135   | 9.02790975  |
| "Pkhd1"    | 2.3597999   | 2.4499712   | 2.3926058   | 2.5105984   | 2.4033842   | 2.3679502   | 2.3979402   | 2.5006688   |
| "Pkia"     | 10.096795   | 10.856086   | 11.551157   | 11.595223   | 10.564888   | 10.169674   | 11.0991105  | 11.766193   |
| "Pkib"     | 2.8808315   | 3.11779065  | 2.94560655  | 3.07262635  | 2.950315    | 2.9035077   | 2.9389784   | 3.0590714   |
| "Pklr"     | 2.3054602   | 2.5105073   | 2.3303067   | 2.5237117   | 2.3827581   | 2.313868    | 2.5653424   | 2.4416952   |
| "Pkm"      | 11.579098   | 12.474495   | 12.672998   | 13.000414   | 12.289913   | 12.277273   | 12.078028   | 12.524281   |
| "Pkmyt1"   | 2.737507    | 2.9000368   | 2.77670895  | 2.87132645  | 2.88575335  | 2.71840965  | 2.962406    | 2.8388997   |
| "Pkn1"     | 4.07641     | 4.6323895   | 4.165533    | 4.640552    | 5.2355704   | 4.916991    | 4.937733    | 4.4332314   |
| "Pknox1"   | 3.3123186   | 3.69614995  | 3.2301265   | 3.37414565  | 3.3534705   | 3.22781915  | 3.34878915  | 3.4754515   |

|             |             |             |             |             |             |             |             |             |
|-------------|-------------|-------------|-------------|-------------|-------------|-------------|-------------|-------------|
| "Pknx2"     | 2.537231    | 2.5970697   | 2.611817    | 2.6501508   | 2.569026    | 2.5864735   | 2.5689948   | 2.6406672   |
| "Pkp1"      | 2.182942    | 1.9691148   | 2.860951    | 2.0079837   | 1.9626137   | 1.9398994   | 1.949253    | 2.0082872   |
| "Pkp2"      | 4.419275525 | 3.917890225 | 3.50569645  | 3.779016675 | 3.745370075 | 3.640904975 | 3.517530175 | 3.54338395  |
| "Pkp4"      | 8.745178    | 8.2468488   | 6.8535408   | 7.164351    | 8.058834    | 8.5832855   | 7.67405115  | 7.7117951   |
| "Pla1a"     | 7.4273934   | 5.40121     | 6.520964    | 6.8018174   | 7.151844    | 7.5243726   | 6.1398163   | 6.8436437   |
| "Pla2g12a"  | 9.419256    | 9.177178    | 8.094435    | 8.724513    | 9.260778    | 8.979909    | 8.745857    | 8.857715    |
| "Pla2g12b"  | 6.4968805   | 2.0633411   | 2.0645397   | 2.194675    | 2.0455158   | 2.0182157   | 2.04467     | 2.1412914   |
| "Pla2g15"   | 3.0958009   | 2.464802    | 3.1278949   | 3.1185937   | 3.1575298   | 3.1925488   | 3.3222985   | 3.100226    |
| "Pla2g16"   | 8.897877    | 9.088657    | 9.332365    | 10.053645   | 10.349559   | 10.034438   | 10.46197    | 10.129948   |
| "Pla2g1b"   | 2.30269125  | 2.4855372   | 2.3393956   | 2.41151595  | 2.4065901   | 2.311216    | 2.33312615  | 2.4070446   |
| "Pla2g2a"   | 2.4076068   | 2.4386444   | 2.5764496   | 2.4822721   | 2.4206853   | 2.374423    | 2.4246626   | 2.4722526   |
| "Pla2g2c"   | 2.4023526   | 2.553504    | 2.546301    | 2.7337956   | 2.5466237   | 2.5224817   | 2.501956    | 2.610457    |
| "Pla2g2d"   | 2.32183925  | 2.43861925  | 2.46425315  | 2.48942065  | 2.3899468   | 4.6639023   | 2.61494875  | 2.47838005  |
| "Pla2g2f"   | 2.4361765   | 2.4863095   | 2.4580042   | 2.5331135   | 2.4585688   | 2.433032    | 2.457804    | 2.5343206   |
| "Pla2g4a"   | 3.5778131   | 3.3380547   | 4.13556     | 3.8675869   | 3.6915114   | 3.7727618   | 3.6685104   | 4.2244377   |
| "Pla2g4f"   | 3.237757    | 3.4401312   | 3.3912342   | 3.6093593   | 3.395125    | 3.3406725   | 3.3896275   | 3.4895697   |
| "Pla2g5"    | 3.5369215   | 3.5762208   | 3.6661465   | 3.6445694   | 3.6079025   | 3.5697625   | 3.602436    | 3.679711    |
| "Pla2g6"    | 6.52009     | 7.008833    | 6.9304056   | 7.271713    | 6.787417    | 6.9256554   | 7.1029286   | 7.139283    |
| "Pla2g7"    | 8.426928    | 8.386841    | 8.259453    | 9.321773    | 7.5506105   | 8.393398    | 8.103812    | 9.285456    |
| "Pla2r1"    | 3.7977204   | 3.9963038   | 4.0992618   | 4.0300436   | 3.950913    | 3.7956614   | 3.9748082   | 4.254292    |
| "Plaa"      | 8.9429655   | 9.343101    | 8.620514    | 8.793289    | 9.116148    | 9.614349    | 8.9918165   | 9.037887    |
| "Plac8"     | 7.965545    | 2.0603971   | 3.0589602   | 2.242435    | 5.9560413   | 7.103846    | 5.9281588   | 3.1258373   |
| "Plag11"    | 6.8389335   | 6.700684    | 8.489893    | 6.566552    | 8.457979    | 7.216279    | 8.1552105   | 7.138203    |
| "Plag12"    | 2.6551123   | 2.8340614   | 2.92580475  | 2.8781717   | 2.80154     | 2.82546615  | 2.7784896   | 2.8601407   |
| "Plat"      | 5.400789    | 4.899627    | 6.8733845   | 6.4007754   | 6.615465    | 5.7702837   | 5.939198    | 6.653473    |
| "Plau"      | 4.640296    | 3.9133909   | 4.60262     | 5.567867    | 4.7736635   | 4.920638    | 4.453665    | 5.537703    |
| "Plaur"     | 3.6550045   | 3.8841486   | 4.1092305   | 3.9388258   | 3.8766654   | 3.862413    | 3.9812994   | 3.938542    |
| "Plbd1"     | 8.589696    | 5.357937    | 7.161899    | 7.6799026   | 7.876747    | 7.913212    | 8.154763    | 8.10531     |
| "Plbd2"     | 4.17336665  | 3.884       | 3.5265885   | 3.85666945  | 4.19117735  | 3.86637195  | 3.7789662   | 3.6174253   |
| "Plcb1"     | 3.0725873   | 3.4220457   | 3.0252213   | 3.3134181   | 3.384922    | 2.968442    | 3.048166    | 3.1577718   |
| "Plcb2"     | 2.69932     | 2.807486    | 2.793091    | 2.8560886   | 2.7998362   | 2.8204877   | 2.7943041   | 2.8482258   |
| "Plcb3"     | 4.84993     | 4.992223    | 5.4350424   | 5.324342    | 5.4965706   | 5.258753    | 5.5193043   | 5.162282    |
| "Plcb4"     | 4.315568    | 4.18561015  | 3.8174225   | 4.1360743   | 4.34178085  | 4.2831713   | 4.2285079   | 4.291082    |
| "Plcd1"     | 4.36275275  | 4.5660272   | 4.88695375  | 4.59823445  | 5.01735855  | 4.5665257   | 4.7380335   | 4.75167185  |
| "Plce1"     | 5.3474407   | 4.6389365   | 5.725274    | 5.1447167   | 5.3851566   | 5.237513    | 5.4276695   | 5.3593435   |
| "Plcg1"     | 2.3400345   | 2.4616756   | 2.4066486   | 2.5768201   | 2.4058788   | 2.3730965   | 2.4054794   | 2.4752026   |
| "Plcg2"     | 3.2525795   | 3.2921078   | 3.2759657   | 3.326477    | 3.2756824   | 5.0082154   | 3.2715268   | 3.3280752   |
| "Plcl2"     | 8.041925    | 9.43346     | 9.110932    | 8.840935    | 8.981524    | 9.126174    | 9.125221    | 8.7512      |
| "Plcz1"     | 2.677663    | 2.8825932   | 2.746472    | 2.9119213   | 2.7528563   | 2.69277     | 2.745879    | 2.8715732   |
| "Plcl1"     | 4.5340932   | 4.838054367 | 4.288061    | 4.212996567 | 4.5864131   | 4.8994284   | 4.309136633 | 4.235413433 |
| "Plld2"     | 4.8285604   | 4.9050455   | 5.4222927   | 5.297928    | 4.891872    | 4.879239    | 5.4905353   | 5.201213    |
| "Plld3"     | 7.0912046   | 5.397777    | 6.5727124   | 6.960834    | 6.542424    | 6.2990146   | 7.064368    | 6.162269    |
| "Plld4"     | 3.5694253   | 3.0426035   | 3.2750947   | 3.158805    | 3.4302456   | 3.8675134   | 3.3563995   | 3.0883155   |
| "Plldn"     | 5.37220265  | 5.4587006   | 5.7057957   | 6.03351445  | 5.67578525  | 5.366008    | 5.81570925  | 5.7893975   |
| "Plec"      | 9.8602123   | 10.04652335 | 9.893825    | 10.0465964  | 9.9696345   | 9.37480435  | 9.91775     | 9.84959435  |
| "Plek"      | 3.6555782   | 2.9602939   | 3.322341467 | 3.1864868   | 3.128067333 | 4.243657133 | 3.480128633 | 3.214945367 |
| "Plek2"     | 2.8113256   | 3.0075996   | 2.882151    | 3.0114906   | 2.8734167   | 2.7644877   | 2.8350358   | 2.9690585   |
| "Plekha1"   | 8.1609      | 9.081411    | 7.976751    | 8.076792    | 8.517243    | 8.774701    | 8.156097    | 8.062548    |
| "Plekha2"   | 5.5246134   | 5.2730947   | 6.738568    | 6.384668    | 6.388975    | 6.952648    | 6.8134055   | 6.6287794   |
| "Plekha3"   | 5.1880243   | 5.4540735   | 5.1705033   | 5.59891535  | 5.2976063   | 5.3742785   | 5.698994    | 5.50511835  |
| "Plekha4"   | 3.9471739   | 3.6752119   | 3.9924613   | 3.7025857   | 4.178243    | 3.4468585   | 4.146841433 | 3.8982288   |
| "Plekha5"   | 3.0190042   | 2.0862266   | 2.03736195  | 2.0816787   | 2.0428361   | 2.10190385  | 2.5728647   | 2.0909292   |
| "Plekha6"   | 3.3118744   | 3.4817586   | 3.6527581   | 3.899858    | 3.442237    | 3.0552337   | 3.4237618   | 3.7621832   |
| "Plekha7"   | 2.477638    | 2.5803404   | 2.5952072   | 2.6764784   | 2.6211789   | 2.5049407   | 2.5953627   | 2.7404387   |
| "Plekha11"  | 8.007796    | 8.793544    | 8.77437     | 8.564634    | 8.468847    | 8.150275    | 8.576225    | 8.522083    |
| "Plekha2"   | 7.5148897   | 7.632463    | 8.14505     | 8.365646    | 7.802491    | 7.6962967   | 7.872566    | 8.3206415   |
| "Plekha1f1" | 7.183997    | 6.4627724   | 7.3711762   | 7.2690663   | 7.6960177   | 7.2253246   | 7.132785    | 7.2707524   |
| "Plekha2f2" | 3.62253045  | 3.3866854   | 3.53582755  | 3.6041919   | 3.55595535  | 3.40169405  | 3.53465     | 3.590145    |
| "Plekha2g2" | 5.152692    | 5.1071897   | 5.7998776   | 5.1299267   | 5.2892866   | 5.9921055   | 5.065344    | 4.714076    |
| "Plekha2g5" | 4.1333156   | 4.08644     | 4.074051    | 3.8771346   | 4.3648496   | 4.1874046   | 4.086809    | 3.808496    |
| "Plekha2g6" | 2.641488    | 2.6551619   | 2.8259447   | 2.695896    | 2.6437488   | 2.61141     | 2.5662894   | 2.7038271   |
| "Plekha11"  | 2.67283795  | 2.78791685  | 2.7270973   | 2.84318805  | 2.72137535  | 2.67394835  | 2.73933165  | 2.8125909   |
| "Plekha13"  | 4.185508    | 3.993368    | 5.8584027   | 6.0630445   | 4.8948574   | 4.1634755   | 6.1224184   | 6.15047     |
| "Plekha1j1" | 2.5788393   | 3.1722171   | 3.24361     | 2.7899175   | 2.6783266   | 2.7207599   | 3.050744    | 2.8130317   |
| "Plekha1n1" | 2.767701    | 3.0428576   | 2.9710443   | 3.0295858   | 2.9940398   | 2.7960622   | 2.9678612   | 3.0286887   |
| "Plekha1o1" | 5.894316    | 5.6419115   | 5.770495    | 5.932187    | 5.129672    | 5.7282124   | 6.0197644   | 5.813784    |
| "Plg"       | 11.543191   | 2.1302989   | 3.6257489   | 2.125603    | 3.0653286   | 2.0707598   | 2.0812013   | 2.2051651   |
| "Plin2"     | 8.884167    | 6.6757946   | 8.068188    | 6.8168607   | 8.971621    | 10.195623   | 9.65144     | 7.520084    |
| "Plin3"     | 7.923465    | 7.8809686   | 7.365572    | 7.393389    | 8.688499    | 8.21467     | 7.800353    | 7.3930335   |
| "Plin4"     | 11.939097   | 13.009047   | 11.226418   | 10.507611   | 12.604842   | 12.656946   | 11.235759   | 11.198239   |
| "Plin5"     | 7.534295    | 7.94138     | 5.432997    | 6.715416    | 9.305935    | 8.450001    | 6.4070477   | 7.5424104   |
| "Plk2"      | 7.605811    | 5.335536    | 6.5840683   | 6.6721845   | 5.955323    | 5.725872    | 7.3567843   | 6.6736546   |
| "Plk3"      | 7.1412935   | 2.1647658   | 2.1264536   | 2.203215    | 2.1281476   | 2.0968077   | 2.1270206   | 2.1783335   |
| "Plk4"      | 2.5877367   | 2.7985436   | 2.8746946   | 2.8089682   | 2.7314315   | 2.92430265  | 2.70713415  | 2.79635875  |
| "Plip"      | 3.1274464   | 3.1406984   | 3.0690217   | 3.210719    | 3.335148    | 2.8189368   | 3.067236    | 3.096753    |
| "Plin"      | 2.749877267 | 2.9032365   | 2.7506419   | 2.9218287   | 2.9729256   | 2.796396933 | 2.8011299   | 3.2943833   |
| "Plod1"     | 6.4830523   | 5.0223503   | 6.862418    | 6.4421363   | 6.657985    | 6.513264    | 6.5185347   | 6.616671    |
| "Plod2"     | 3.12536085  | 2.8255619   | 3.4339791   | 2.40593085  | 3.4358214   | 3.4216157   | 3.51963635  | 2.7745371   |
| "Plod3"     | 5.4094343   | 5.0100846   | 5.354703    | 5.06184     | 5.780989    | 5.421913    | 5.8810873   | 5.137795    |
| "Plp1"      | 5.659654833 | 5.237168267 | 5.27993467  | 4.899301367 | 5.953283667 | 4.8168208   | 5.898151067 | 5.280828767 |
| "Plp2"      | 6.13200875  | 6.04877415  | 5.94731115  | 5.9447684   | 5.9889572   | 5.9942099   | 6.1461213   | 5.8494836   |

|            |             |             |             |             |             |             |             |             |
|------------|-------------|-------------|-------------|-------------|-------------|-------------|-------------|-------------|
| "Plrg1"    | 8.027721    | 8.599671    | 7.904044    | 7.831002    | 7.9305105   | 8.163998    | 8.062658    | 8.036423    |
| "Pls1"     | 2.3996928   | 2.585649    | 2.4153628   | 2.552506    | 2.585203    | 2.3996432   | 2.4451482   | 2.5401251   |
| "Pls3"     | 8.534214    | 7.727135    | 8.71496     | 8.625355    | 8.31186     | 8.448715    | 8.243939    | 8.822807    |
| "Plscr1"   | 4.90386675  | 3.86442915  | 3.82905625  | 3.98162845  | 3.67374155  | 3.9206035   | 3.81710505  | 3.957498    |
| "Plscr2"   | 3.9964483   | 3.745682    | 3.4904354   | 3.7537553   | 3.580312    | 3.4874601   | 3.807333    | 3.7468243   |
| "Plscr3"   | 3.88597035  | 3.9911887   | 4.40705635  | 4.47911385  | 4.29185035  | 4.26541075  | 4.5888556   | 4.7536902   |
| "Pltp"     | 6.370431    | 5.09286045  | 6.2582464   | 6.18381375  | 6.65033625  | 6.4720273   | 6.4589304   | 6.2802092   |
| "Plvap"    | 7.4757895   | 6.9054556   | 7.3760605   | 7.3654337   | 7.765032    | 8.530372    | 7.4666657   | 7.5362377   |
| "Plxdc1"   | 2.3617234   | 2.5815938   | 2.8263154   | 2.9736059   | 2.545486    | 2.3247845   | 2.5579937   | 2.614018    |
| "Plxdc2"   | 7.1602537   | 7.39147035  | 7.8390827   | 7.430685    | 7.5753275   | 7.8311855   | 7.15757     | 7.63522225  |
| "Plxna2"   | 5.137428    | 4.8685403   | 4.5529947   | 4.523365    | 4.625276    | 4.6126904   | 4.8327417   | 4.6645236   |
| "Plxnb2"   | 5.694332    | 4.154635    | 5.207635    | 4.227435    | 5.1143      | 4.966584    | 5.290303    | 4.277986    |
| "Plxnc1"   | 4.915657    | 2.6971679   | 2.712992    | 2.7606082   | 2.7107348   | 3.3517919   | 2.687495    | 2.7430727   |
| "Plxnd1"   | 6.964697    | 6.411827    | 7.670536    | 7.3500357   | 6.4838796   | 6.984759    | 7.5975137   | 7.207388    |
| "Pm20d1"   | 6.5272026   | 2.935048    | 2.9587631   | 3.1298583   | 3.0634015   | 2.9126027   | 2.9737442   | 3.2367961   |
| "Pmaip1"   | 3.6282127   | 3.0330138   | 2.9524627   | 3.0569139   | 2.9028323   | 3.0242796   | 3.0122244   | 3.0312364   |
| "Pmepa1"   | 3.967071533 | 4.172020933 | 4.547600633 | 4.464615067 | 5.0930416   | 5.006935133 | 4.0971164   | 4.373401667 |
| "Pmf1"     | 2.4506443   | 2.4539843   | 2.45281     | 2.4822075   | 2.4538128   | 2.3928227   | 2.4484105   | 2.4899366   |
| "Pml"      | 2.182636    | 2.2279422   | 2.2060487   | 2.2836494   | 2.2063172   | 2.4926786   | 2.2083812   | 2.2755597   |
| "Pmm1"     | 6.85564735  | 6.92187     | 6.3777265   | 6.8092677   | 7.38169885  | 7.14137385  | 7.1537132   | 6.6597955   |
| "Pmm2"     | 4.3470521   | 4.51489925  | 4.34331585  | 4.6177088   | 4.35483195  | 4.4660355   | 4.17941155  | 4.2952937   |
| "Pmp22"    | 10.601202   | 10.0125885  | 11.128944   | 9.8897295   | 11.439578   | 9.857932    | 11.035271   | 10.492151   |
| "Pmpca"    | 8.94993875  | 9.32602595  | 9.4521215   | 9.534841    | 9.2351835   | 9.1780905   | 9.2056245   | 9.45618925  |
| "Pmpcb"    | 9.19193     | 8.996949    | 9.428101    | 9.6647915   | 9.3569915   | 8.9355395   | 9.3051905   | 9.714491    |
| "Pms2"     | 3.7287245   | 4.0222344   | 4.403118    | 5.292859    | 4.213323    | 4.295717    | 4.647469    | 4.395123    |
| "Pmvk"     | 8.329853    | 6.5424585   | 6.946091    | 6.9148564   | 6.6017632   | 7.31425     | 6.9720287   | 6.838655    |
| "Pncck"    | 2.7230392   | 2.8375034   | 3.0513816   | 2.9002123   | 2.8125148   | 2.7692456   | 2.7976644   | 2.8277087   |
| "Pnkcd"    | 6.70002365  | 6.40241985  | 6.79081     | 6.9016565   | 6.6392393   | 6.26275     | 6.9192815   | 7.01872525  |
| "Pnpk"     | 6.5301714   | 6.8306274   | 6.639599    | 6.6488085   | 6.2844677   | 6.290504    | 6.7709317   | 6.470597    |
| "Pnlip"    | 4.3407521   | 2.77887035  | 2.57327195  | 2.6501621   | 2.55827125  | 2.4722495   | 2.5475756   | 2.6390344   |
| "Pnliprp2" | 2.6917461   | 2.81762555  | 2.77354575  | 2.862553    | 2.7513454   | 2.694543    | 2.72856605  | 2.8259859   |
| "Pnmnt"    | 3.09086165  | 7.31596215  | 2.94682575  | 3.5003264   | 5.02054645  | 3.70596115  | 2.9562749   | 3.14888165  |
| "Pnn"      | 6.920893867 | 7.976934    | 7.091379233 | 6.593155867 | 7.232688833 | 7.474631767 | 7.063147167 | 7.112755233 |
| "Pno1"     | 9.287213    | 9.590214    | 9.609809    | 9.893395    | 9.431814    | 9.263802    | 9.525625    | 9.808157    |
| "Pnp"      | 9.2531025   | 7.304068    | 8.6294465   | 6.9889147   | 8.655051    | 8.8743275   | 8.845044    | 7.5935527   |
| "Pnp1a2"   | 5.9618635   | 6.9559985   | 5.0837035   | 5.3128805   | 6.35410995  | 7.2445286   | 5.8310431   | 5.45223885  |
| "Pnp1a3"   | 3.2328658   | 3.516151    | 3.7441308   | 3.8046463   | 3.8213372   | 3.1584249   | 6.1243153   | 3.8532722   |
| "Pnp1a6"   | 3.7242262   | 3.6064188   | 4.241124    | 4.0809884   | 4.141581    | 4.2085867   | 4.5738955   | 3.9931982   |
| "Pnp1a7"   | 9.32316     | 9.616005    | 7.513422    | 7.412483    | 9.381372    | 9.199131    | 7.2553644   | 7.9841313   |
| "Pnp1a8"   | 11.095001   | 11.755114   | 10.779081   | 11.214914   | 11.434359   | 12.017912   | 10.995839   | 11.16588    |
| "Pnp0"     | 6.4683294   | 4.2516828   | 4.3746243   | 4.9177256   | 5.0323753   | 4.1260567   | 4.522796    | 4.7227473   |
| "Pnrc1"    | 7.5924105   | 7.7289225   | 6.900507    | 7.0108955   | 7.38945165  | 7.5289197   | 7.45311465  | 7.264224    |
| "Pnrc2"    | 8.75860625  | 9.0943215   | 8.8945645   | 9.1499875   | 9.3876195   | 8.766407    | 9.459663    | 9.551982    |
| "Poc5"     | 2.82603125  | 4.31060285  | 2.7316998   | 3.312848    | 3.92020465  | 3.62251065  | 2.9644487   | 2.92187475  |
| "Podxl"    | 7.465727    | 5.7723155   | 7.1215696   | 7.3825226   | 6.797066    | 7.296544    | 7.5174904   | 7.869358    |
| "Pof1b"    | 3.9174864   | 2.7963626   | 6.264562    | 2.8617241   | 2.742163    | 2.6539056   | 2.7262123   | 2.8375702   |
| "Pofut1"   | 2.1967711   | 2.2005486   | 2.207262    | 2.2594714   | 2.1843822   | 2.7040977   | 2.2071807   | 2.2533846   |
| "Pofut2"   | 6.2766637   | 5.776633767 | 6.694479067 | 6.440893233 | 5.819135567 | 5.816839533 | 6.518563233 | 6.453681267 |
| "Poglut1"  | 6.04918     | 6.3767924   | 6.217638    | 5.9247837   | 6.3199973   | 6.4048505   | 6.159609    | 6.153062    |
| "Pola1"    | 2.6891966   | 2.5031629   | 2.5401871   | 2.5693712   | 2.5055752   | 2.6767364   | 2.960026    | 2.6087961   |
| "Pola2"    | 5.474324    | 5.488331    | 5.976667    | 6.9646616   | 5.984555    | 5.7621284   | 6.563561    | 6.659678    |
| "Polb"     | 8.115276333 | 7.9575218   | 8.555826167 | 8.408754133 | 8.285347667 | 8.060227433 | 8.523410367 | 8.505828333 |
| "Pold1"    | 4.7245498   | 4.898362    | 4.766878    | 4.95269415  | 4.9125166   | 4.890237    | 4.96761545  | 4.9530932   |
| "Pold2"    | 7.721227    | 7.5747023   | 7.2631435   | 7.7946734   | 7.4592624   | 7.4479294   | 8.267248    | 7.431654    |
| "Pold3"    | 4.88431175  | 5.19185495  | 4.73747435  | 4.7986031   | 4.740839    | 4.9739172   | 5.03021195  | 4.804615    |
| "Pold4"    | 7.9700193   | 8.0273695   | 6.983433    | 7.261358    | 7.5215015   | 7.7324853   | 7.3603544   | 6.760146    |
| "Poldip2"  | 8.4165835   | 8.8039485   | 8.604249    | 8.83626185  | 8.63948315  | 8.553022    | 8.8180275   | 8.6737705   |
| "Poldip3"  | 6.94627912  | 7.415521    | 6.7644048   | 6.726702    | 7.2139716   | 7.78814952  | 6.76963742  | 6.8473052   |
| "Pole"     | 3.603015    | 4.1948433   | 3.6271825   | 3.6797938   | 4.6798096   | 3.6305568   | 3.586139    | 3.6934147   |
| "Pole2"    | 2.8578131   | 2.8150651   | 3.4196126   | 2.9132469   | 2.9457078   | 2.857929    | 2.8819222   | 2.9169137   |
| "Pole3"    | 5.1626474   | 5.2919599   | 5.121203833 | 5.103923467 | 4.884454167 | 4.8369373   | 5.107427567 | 5.107731467 |
| "Pole4"    | 6.8779526   | 7.1020162   | 7.369011    | 7.57967815  | 6.57153715  | 7.3933623   | 7.11867525  | 7.4866524   |
| "Polg"     | 4.8513312   | 4.733919767 | 4.442927567 | 4.6251292   | 4.7952203   | 4.832794033 | 4.733154933 | 4.7586097   |
| "Polg2"    | 5.965505    | 6.210071    | 5.057436    | 6.015648    | 6.1974373   | 5.8442836   | 5.6299415   | 5.7930856   |
| "Polh"     | 4.4323688   | 4.748728    | 5.42184     | 6.1216335   | 4.8131266   | 4.4561443   | 4.751333    | 5.700504    |
| "Poli"     | 3.043768    | 3.1453044   | 3.1748717   | 3.2322578   | 3.1785603   | 3.2841792   | 3.1580958   | 3.221546    |
| "Polk"     | 4.439128    | 4.7047267   | 5.0927876   | 5.9800165   | 4.597518    | 4.46692675  | 4.7376181   | 5.7511571   |
| "Poll"     | 2.622943    | 3.3461657   | 3.0879269   | 3.4782157   | 3.0305407   | 2.8384562   | 3.0870717   | 3.1868577   |
| "Polr1a"   | 5.3658418   | 5.5620893   | 5.1196209   | 4.898220933 | 4.9256301   | 5.098201533 | 5.222865367 | 5.2499392   |
| "Polr1b"   | 4.246695    | 5.378108    | 4.437195    | 5.0298953   | 4.862616    | 4.413912    | 4.569885    | 4.6613355   |
| "Polr1c"   | 7.72692085  | 7.8048275   | 7.3174162   | 7.2094615   | 7.495634    | 7.6797675   | 7.717181    | 7.50771725  |
| "Polr1d"   | 10.3430765  | 10.2658935  | 10.1512315  | 10.2340705  | 10.1706195  | 10.200799   | 10.678746   | 9.9283215   |
| "Polr1e"   | 4.22736285  | 4.46728985  | 4.0020753   | 3.9376193   | 4.32528685  | 4.0416809   | 4.50460555  | 4.0268265   |
| "Polr2a"   | 6.993407    | 7.6101565   | 7.2614636   | 7.27778     | 7.382692    | 7.7828617   | 7.1497536   | 7.5384707   |
| "Polr2b"   | 9.672455    | 10.0035095  | 9.965755    | 9.987369    | 10.009717   | 9.826685    | 9.861815    | 9.976538    |
| "Polr2c"   | 9.841883    | 10.377029   | 10.111899   | 10.058743   | 9.9617405   | 9.77546     | 10.31028    | 10.018812   |
| "Polr2d"   | 6.141869    | 6.3222914   | 6.4753265   | 6.3785357   | 6.2210364   | 6.2250705   | 6.5196853   | 6.290521    |
| "Polr2e"   | 6.05422315  | 5.9931346   | 5.89295285  | 6.26954655  | 6.01041835  | 5.75150375  | 6.05005615  | 5.99129285  |
| "Polr2f"   | 6.22048935  | 6.1714995   | 6.26928195  | 6.3174915   | 6.1142392   | 5.996731    | 6.46844635  | 6.3909875   |
| "Polr2g"   | 9.271027    | 9.271172    | 9.080551    | 9.190451    | 9.139134    | 8.949899    | 9.326845    | 9.149855    |
| "Polr2i"   | 9.768151    | 10.0937195  | 10.153478   | 10.155418   | 9.771083    | 9.421629    | 10.3541765  | 10.002764   |

|            |             |             |             |             |             |             |             |             |
|------------|-------------|-------------|-------------|-------------|-------------|-------------|-------------|-------------|
| "Polr2j"   | 8.862926    | 9.407984    | 8.985261    | 8.904197    | 8.865278    | 8.6477585   | 9.311213    | 8.904798    |
| "Polr2l"   | 11.136023   | 10.936356   | 11.105245   | 11.188517   | 11.034488   | 10.663738   | 11.619885   | 11.000368   |
| "Polr2m"   | 10.099188   | 10.3124075  | 10.755307   | 10.964541   | 10.2284155  | 9.88702     | 10.522843   | 10.926652   |
| "Polr3a"   | 5.64346005  | 6.57601625  | 5.70701375  | 6.1540335   | 5.87088065  | 6.1228915   | 5.63206985  | 5.9714368   |
| "Polr3c"   | 5.3588175   | 5.5539132   | 5.22096035  | 5.76447665  | 5.1844279   | 5.1364952   | 5.9876009   | 5.79745295  |
| "Polr3d"   | 5.03790775  | 5.69206865  | 4.3847519   | 4.83752435  | 4.8285799   | 5.2003792   | 4.7315419   | 4.7502599   |
| "Polr3e"   | 4.68626715  | 4.81877575  | 4.56778585  | 4.6689283   | 4.7154336   | 4.8232187   | 4.6612495   | 4.5206751   |
| "Polr3f"   | 4.2261472   | 5.3134816   | 4.38015835  | 4.59292835  | 4.42570315  | 4.2510823   | 4.3943978   | 4.46422395  |
| "Polr3g"   | 2.14077     | 2.1542058   | 2.1520476   | 2.21015     | 2.1094806   | 2.1310282   | 2.60641     | 2.1930602   |
| "Polr3gl"  | 7.627842    | 8.21497     | 8.039021    | 8.685667    | 8.015288    | 8.140759    | 8.186196    | 8.518608    |
| "Polr3h"   | 4.22913425  | 4.4274212   | 4.4727857   | 4.60773015  | 4.15326855  | 4.1619148   | 4.3799592   | 4.36997795  |
| "Polr3k"   | 5.39330958  | 5.87782214  | 6.21322514  | 6.54945642  | 5.56155842  | 5.59296682  | 6.03414634  | 6.18932802  |
| "Polrmt"   | 6.70649175  | 6.892735    | 6.7162358   | 7.02544885  | 7.26741165  | 6.5716381   | 6.56139685  | 7.0113652   |
| "Pom121"   | 7.22750875  | 8.19109165  | 6.9363763   | 7.075881    | 7.4852264   | 7.9587615   | 6.8517043   | 6.9913223   |
| "Pomc"     | 2.8391964   | 3.001177    | 2.9108758   | 3.0702584   | 2.9243128   | 2.8326588   | 2.9073305   | 3.043322    |
| "Pomgnt1"  | 7.161028    | 7.292691    | 7.469027    | 7.3386836   | 7.3263555   | 7.2367086   | 7.237865    | 7.2362266   |
| "Pomp"     | 10.864107   | 10.960783   | 10.938219   | 10.940266   | 10.823166   | 10.813938   | 11.147877   | 10.915289   |
| "Pomt1"    | 2.8287234   | 4.273614    | 5.2331986   | 4.372054    | 4.327586    | 4.3067756   | 4.369031    | 4.3725657   |
| "Pomt2"    | 2.9035463   | 2.7769718   | 2.7864685   | 2.8435912   | 2.780819    | 2.7824013   | 2.7871265   | 2.8195853   |
| "Pon1"     | 11.213334   | 3.3814592   | 5.545446    | 4.213834    | 6.790751    | 4.4697895   | 4.004766    | 4.8133564   |
| "Pon2"     | 8.662138    | 8.198943    | 8.174437    | 8.671146    | 8.580041    | 8.28927     | 8.41622     | 8.526907    |
| "Pon3"     | 6.2006826   | 5.4766254   | 6.2026734   | 5.6660132   | 6.996477    | 6.9748507   | 7.021967    | 5.7449884   |
| "Pop4"     | 6.8018856   | 7.0321417   | 6.554964    | 6.959829    | 6.7563295   | 6.6739197   | 6.6567783   | 7.1403847   |
| "Pop5"     | 5.7577845   | 5.6758706   | 5.89401545  | 5.981909    | 5.7608809   | 5.5237745   | 5.94111675  | 6.01658975  |
| "Pop7"     | 6.2621512   | 6.3192515   | 6.341789    | 6.6395555   | 6.2472925   | 5.901531    | 6.9545035   | 6.3952813   |
| "Popdc2"   | 6.821534    | 8.614451    | 7.2170033   | 7.5015054   | 7.0424714   | 6.4795923   | 6.8253117   | 6.9965506   |
| "Popdc3"   | 9.683018    | 9.298302    | 9.39025     | 9.661824    | 8.975815    | 8.939722    | 10.103064   | 9.484427    |
| "Por"      | 8.589516    | 5.373151    | 5.3678293   | 4.809537    | 7.075365    | 7.1990185   | 6.6809397   | 4.809092    |
| "Porcn"    | 3.315722    | 3.317393    | 3.373399    | 3.4562662   | 3.6666858   | 3.2980149   | 3.3755462   | 3.352076    |
| "Postn"    | 8.621562    | 4.338846    | 11.091613   | 8.595302    | 10.314252   | 8.985076    | 9.762839    | 10.014409   |
| "Pot1a"    | 6.6866846   | 7.6121325   | 6.3383007   | 6.992821    | 7.397086    | 7.217825    | 6.369337    | 7.118646    |
| "Pou2af1"  | 2.363243    | 2.4643426   | 2.4186406   | 2.5221114   | 2.4231772   | 6.852175    | 2.14664     | 2.509811    |
| "Pou2f1"   | 3.526851    | 3.912380367 | 3.475660333 | 3.513216167 | 3.527576767 | 3.4424285   | 3.4501156   | 3.496525667 |
| "Pou2f3"   | 2.526306    | 2.6059906   | 2.6362925   | 2.6577508   | 2.5883396   | 2.5509427   | 2.5767372   | 2.6542356   |
| "Pou3f1"   | 3.10514     | 3.440004    | 3.522457    | 3.464453    | 3.263157    | 3.1438324   | 3.2360215   | 3.3926716   |
| "Pou4f3"   | 2.3246899   | 2.4093904   | 2.3625748   | 2.4709067   | 2.3639734   | 2.340126    | 2.3597398   | 2.427208    |
| "Pou5f1"   | 2.339308    | 2.36461     | 2.3519006   | 2.4247334   | 2.3541136   | 2.3323894   | 2.3449206   | 2.4122245   |
| "Pou6f1"   | 5.594855    | 6.128618    | 6.0005093   | 5.9479237   | 6.005818    | 5.945509    | 5.7054863   | 5.6849504   |
| "Ppa1"     | 9.334697    | 8.991362    | 9.241692    | 9.136948    | 9.209053    | 9.807638    | 9.395617    | 9.083005    |
| "Ppa2"     | 8.614515    | 8.143892    | 8.968983    | 8.99559     | 8.48739     | 8.153025    | 9.015351    | 9.092674    |
| "Ppan"     | 6.2746286   | 6.4210467   | 5.6353054   | 5.289612    | 5.825079    | 6.0363436   | 5.733639    | 5.8610682   |
| "Ppap2a"   | 7.249630267 | 6.847002767 | 7.3286625   | 7.3375482   | 7.071436233 | 6.900924033 | 7.339753133 | 7.310825433 |
| "Ppap2b"   | 10.1014175  | 10.8139595  | 10.4306485  | 10.14485125 | 10.776131   | 11.13672125 | 10.284249   | 10.2398285  |
| "Ppap2c"   | 3.8799527   | 3.07972315  | 3.04628945  | 3.1338087   | 3.3498169   | 3.08281745  | 3.37663635  | 3.10339905  |
| "Ppapdc3"  | 6.4390464   | 7.1555      | 9.29098     | 9.423038    | 7.1017833   | 6.4719625   | 8.604763    | 8.811465    |
| "Ppara"    | 8.226002    | 6.753085    | 5.376026    | 6.059439    | 7.139306    | 6.3527555   | 6.4000034   | 6.8628626   |
| "Ppard"    | 2.344118    | 2.4625728   | 2.4236522   | 2.5213716   | 2.4246824   | 2.3899045   | 2.422251    | 2.5061305   |
| "Pparg"    | 5.0150943   | 5.226191    | 6.4829736   | 4.2114906   | 8.090498    | 8.403034    | 8.557508    | 5.8448725   |
| "Pparg1a"  | 10.5399109  | 8.136667    | 7.93323978  | 8.57167974  | 7.36993956  | 7.09622522  | 7.966552    | 8.53612368  |
| "Ppargc1b" | 6.3406067   | 3.595463    | 8.21243     | 8.681262    | 6.7355504   | 5.0137553   | 8.213069    | 8.395962    |
| "Ppat"     | 5.74420975  | 6.04663135  | 6.78933075  | 7.121617    | 6.0642238   | 5.39061215  | 6.3997013   | 6.81060715  |
| "Ppbbp"    | 2.3940363   | 2.2005177   | 2.1803913   | 2.2542977   | 2.1814022   | 2.2095585   | 2.1788802   | 2.2477572   |
| "Ppcdc"    | 2.9248828   | 2.9721169   | 2.9849045   | 3.0109618   | 3.09092045  | 3.3586021   | 3.06576895  | 2.96403025  |
| "Ppcs"     | 4.8816166   | 3.8836665   | 4.571473    | 5.3424234   | 4.7529755   | 4.70973     | 5.2927136   | 5.275749    |
| "Ppdpf"    | 8.471926    | 8.122315    | 8.676017    | 8.851171    | 8.261681    | 8.180233    | 9.145477    | 8.661242    |
| "Ppef2"    | 2.480938    | 2.59663     | 2.5274935   | 2.616718    | 2.5346594   | 2.5057168   | 2.5322003   | 2.5922441   |
| "Ppfia4"   | 2.8845856   | 3.26089225  | 3.02821725  | 3.1665996   | 2.93221715  | 2.9902705   | 3.0578309   | 3.07663415  |
| "Ppfibp2"  | 4.3098297   | 3.182411    | 2.8931682   | 2.9455552   | 3.3309393   | 2.889032    | 2.8830547   | 2.942779    |
| "Ppia"     | 12.73389    | 12.157988   | 12.830543   | 12.460423   | 12.662885   | 12.797931   | 13.140642   | 12.435438   |
| "Ppib"     | 9.965594    | 9.192816    | 10.31533975 | 9.540501    | 10.0061025  | 9.8237315   | 10.0242165  | 9.655045    |
| "Ppic"     | 8.081159    | 7.3643274   | 9.481368    | 8.830809    | 8.673576    | 8.279347    | 8.7323065   | 8.692051    |
| "Ppie"     | 5.870433    | 5.9685073   | 5.7525377   | 5.9727993   | 5.784458    | 5.900371    | 5.6534243   | 5.8384886   |
| "Ppif"     | 4.84136265  | 4.61173805  | 4.5715594   | 4.9945123   | 4.7826366   | 4.06807345  | 4.5754147   | 4.83779515  |
| "Ppig"     | 8.2265735   | 8.823856    | 7.9292425   | 8.1339075   | 8.65625125  | 8.83339     | 8.09335875  | 8.1600115   |
| "Ppil2"    | 6.892382    | 6.8011475   | 6.6981964   | 6.708556    | 6.641107    | 7.0136256   | 6.5968843   | 6.4794865   |
| "Ppil4"    | 8.191606    | 8.8286915   | 7.917879    | 7.937282    | 8.376019    | 8.433586    | 7.9484415   | 7.995201    |
| "Ppl"      | 2.7656238   | 3.1285896   | 3.7616723   | 3.170731    | 3.7035952   | 3.1144583   | 3.0633225   | 3.1669786   |
| "Ppm1a"    | 7.06836745  | 7.3806749   | 7.51487535  | 7.6575394   | 7.3645425   | 7.335375    | 7.325635075 | 7.7061704   |
| "Ppm1b"    | 10.2194065  | 10.26802867 | 9.970992    | 10.17116467 | 10.09902233 | 10.47942967 | 9.993927667 | 10.31676167 |
| "Ppm1d"    | 5.970051    | 6.653231    | 4.1821165   | 5.62114     | 6.163645    | 6.368129    | 5.1899347   | 5.496236    |
| "Ppm1g"    | 6.394669    | 6.7793155   | 6.412374    | 6.583172    | 6.571275    | 6.816544    | 6.2652893   | 6.2217875   |
| "Ppm1m"    | 5.379304    | 5.405175    | 6.244359    | 5.621763    | 6.7865944   | 7.8419857   | 7.102299    | 5.7357717   |
| "Ppme1"    | 6.871273    | 7.095068    | 6.455154    | 6.5806417   | 6.835017    | 7.1447697   | 6.824685    | 6.645308    |
| "Ppnr"     | 2.7341285   | 3.4991362   | 3.5660124   | 3.5489604   | 4.0248327   | 3.4389148   | 3.4952881   | 3.59919     |
| "Ppox"     | 3.7486771   | 4.0570865   | 3.84740015  | 4.085534    | 4.1534397   | 3.89459035  | 4.07517335  | 4.1202438   |
| "Ppp1ca"   | 11.194675   | 11.121805   | 11.208662   | 11.169161   | 10.986652   | 10.7355     | 11.780409   | 11.078605   |
| "Ppp1cb"   | 10.74809927 | 11.21192433 | 11.03826767 | 11.50663    | 11.01537467 | 10.73973933 | 11.03109467 | 11.640444   |
| "Ppp1cc"   | 10.2374395  | 10.6880725  | 11.2539095  | 11.318916   | 10.541771   | 10.6203565  | 10.847517   | 11.172285   |
| "Ppp1r11"  | 5.07163975  | 4.8074413   | 4.719784    | 4.6492173   | 4.9858906   | 5.0741247   | 5.539209    | 4.8701482   |
| "Ppp1r12c" | 2.5374625   | 2.7119493   | 2.5475702   | 2.6014788   | 2.5458345   | 2.527666    | 2.5261183   | 2.6029239   |
| "Ppp1r14a" | 3.833311    | 3.4034507   | 3.7485716   | 3.8261685   | 3.8828576   | 3.7121403   | 4.0482206   | 3.716219    |

|              |             |             |             |             |             |             |             |             |
|--------------|-------------|-------------|-------------|-------------|-------------|-------------|-------------|-------------|
| "Ppp1r14b"   | 6.4296232   | 6.66068275  | 6.6037851   | 6.6967718   | 6.37645425  | 6.30567175  | 7.03871625  | 6.41152715  |
| "Ppp1r14c"   | 8.961445    | 9.440587    | 11.112858   | 10.995872   | 9.182183    | 9.040074    | 10.344356   | 10.592575   |
| "Ppp1r15a"   | 9.092163    | 10.131129   | 6.0436845   | 6.0081844   | 8.492765    | 9.829041    | 6.713093    | 5.9281545   |
| "Ppp1r15b"   | 9.465977    | 9.5167465   | 8.572384    | 8.436811    | 9.281063    | 9.551755    | 8.861809    | 8.434063    |
| "Ppp1r17"    | 2.8674245   | 3.018629    | 2.9034631   | 3.041357    | 2.9163847   | 2.8296144   | 2.901601    | 3.0456085   |
| "Ppp1r18"    | 5.314026    | 5.646877    | 5.6432586   | 5.6614656   | 5.842853    | 5.6118774   | 5.646111    | 5.5666924   |
| "Ppp1r1a"    | 9.515228    | 9.903082    | 10.274779   | 8.870155    | 10.29913    | 9.4652195   | 10.229917   | 8.970837    |
| "Ppp1r2-ps9" | 2.438857    | 2.4892526   | 2.459597    | 2.5392694   | 2.4603906   | 2.4332433   | 2.4546785   | 2.5253935   |
| "Ppp1r2"     | 7.8397199   | 8.123440333 | 8.387563667 | 8.630733667 | 8.129374233 | 8.1089939   | 8.402408    | 8.740063333 |
| "Ppp1r37"    | 7.2363687   | 7.2433133   | 7.156854    | 7.3628664   | 7.0946484   | 7.144459    | 7.31261     | 7.0921745   |
| "Ppp1r3c"    | 11.149124   | 10.832823   | 10.205473   | 10.081487   | 10.148346   | 10.07157635 | 11.0540485  | 10.43542    |
| "Ppp1r3f"    | 4.535034    | 5.135596    | 4.7065086   | 4.782646    | 4.9411545   | 4.686636    | 4.4778833   | 4.3952956   |
| "Ppp1r42"    | 2.854046    | 3.069742    | 2.932479    | 3.0161517   | 2.9350264   | 2.8575177   | 2.9286952   | 3.043361    |
| "Ppp1r7"     | 6.7267008   | 7.0358889   | 6.790568    | 6.8841844   | 6.6939437   | 6.689738    | 7.03608965  | 6.874224    |
| "Ppp1r8"     | 4.95643605  | 5.7661868   | 5.64818335  | 5.51521585  | 5.649994    | 5.572241    | 5.58707335  | 5.40074395  |
| "Ppp2ca"     | 10.9736795  | 11.429336   | 10.441366   | 10.6783625  | 11.025169   | 10.972342   | 10.54615    | 10.6346825  |
| "Ppp2cb"     | 5.5926969   | 5.7615709   | 5.71013625  | 5.8230722   | 5.6046319   | 5.7022549   | 5.7031822   | 5.82331015  |
| "Ppp2r1a"    | 8.81338686  | 9.0448618   | 9.8831832   | 8.91044652  | 8.8106407   | 8.8990834   | 8.6962566   | 8.90789792  |
| "Ppp2r1b"    | 6.5058765   | 6.079277    | 6.577851    | 5.8672423   | 7.97095     | 9.137731    | 8.179481    | 6.1259875   |
| "Ppp2r2a"    | 6.328744233 | 7.214848033 | 6.969054    | 7.244897633 | 6.7972525   | 7.024557667 | 6.964338433 | 7.1993695   |
| "Ppp2r2b"    | 2.287375    | 2.4083831   | 2.4355211   | 2.441625    | 2.3312469   | 2.2854724   | 2.3400145   | 2.4287217   |
| "Ppp2r2d"    | 7.104702467 | 7.6304111   | 6.745604733 | 6.9724358   | 7.022170933 | 7.372035333 | 6.817280433 | 6.946130367 |
| "Ppp2r3c"    | 4.761478967 | 5.105030867 | 4.968420433 | 5.030302133 | 4.858767367 | 4.864519633 | 5.0734765   | 4.993297567 |
| "Ppp2r3d"    | 3.4962652   | 3.331296    | 3.1296666   | 2.9615552   | 3.5506124   | 3.0652416   | 3.2912915   | 3.0422637   |
| "Ppp2r4"     | 5.511260933 | 5.6817707   | 5.929693233 | 5.985551467 | 5.7190443   | 5.581179667 | 6.053703467 | 5.9008623   |
| "Ppp2r5a"    | 9.290815    | 9.356489    | 10.075395   | 9.997505    | 9.677277    | 9.327487    | 10.520898   | 10.034836   |
| "Ppp2r5b"    | 5.2815695   | 5.399614    | 5.397507    | 6.1417303   | 5.052332    | 5.1409583   | 5.785878    | 5.468872    |
| "Ppp2r5c"    | 5.919208933 | 6.00562685  | 6.422282633 | 6.45434155  | 5.9702417   | 5.906813333 | 6.478398117 | 6.19458655  |
| "Ppp2r5d"    | 6.034829    | 6.2830777   | 6.2405176   | 6.0970073   | 6.093887    | 5.9692926   | 6.0789537   | 6.104219    |
| "Ppp3ca"     | 10.268499   | 10.74690267 | 11.27408067 | 11.02521333 | 10.73770933 | 10.11312033 | 10.77897233 | 11.02960133 |
| "Ppp3cb"     | 7.9714375   | 8.17631535  | 8.639269    | 8.76799715  | 8.269537    | 8.3351955   | 8.37713515  | 8.6342497   |
| "Ppp3cc"     | 3.8273959   | 4.1465679   | 3.9209409   | 4.3372666   | 3.559836    | 4.0747669   | 4.14099445  | 4.19004865  |
| "Ppp3r1"     | 6.334782567 | 6.345421733 | 6.767868533 | 6.6773828   | 6.239010333 | 6.2544814   | 6.3166813   | 6.532831833 |
| "Ppp4c"      | 7.5889754   | 7.7844005   | 7.391999    | 7.036325    | 7.530895    | 7.9938817   | 7.699521    | 7.0799446   |
| "Ppp4r1"     | 7.319434    | 7.624874    | 7.4659896   | 7.406144    | 7.1649494   | 7.754825    | 7.3944507   | 7.4246087   |
| "Ppp4r2"     | 10.858412   | 11.292919   | 10.934285   | 11.019769   | 11.117588   | 11.158255   | 10.895853   | 11.098773   |
| "Ppp5c"      | 6.794304633 | 7.026213167 | 6.855009467 | 7.060819333 | 6.954500767 | 6.800590533 | 6.678852133 | 6.909426    |
| "Ppp6c"      | 8.2838545   | 8.5469245   | 8.455737    | 8.553899    | 8.4728785   | 8.4319855   | 7.9599295   | 8.5606185   |
| "Ppp6r2"     | 3.223769833 | 3.801584533 | 3.653746333 | 3.618677533 | 3.3958478   | 3.4070174   | 3.644289333 | 3.526243833 |
| "Ppp6r3"     | 4.940838233 | 5.7237      | 4.953819367 | 4.7989339   | 5.015899267 | 5.301447333 | 4.663555933 | 4.7472295   |
| "Pppde1"     | 7.99628565  | 8.2096155   | 8.9148467   | 9.0351285   | 8.09140485  | 8.6925792   | 7.8057589   | 8.7873765   |
| "Pppde2"     | 4.9964557   | 4.84468795  | 4.961042    | 5.1693635   | 5.173814    | 5.4002005   | 5.0398482   | 4.9921695   |
| "Pprc1"      | 7.0327883   | 7.863854    | 6.766704    | 6.604931    | 7.2103443   | 7.2380342   | 6.8031096   | 6.4985743   |
| "Ppt1"       | 4.6641806   | 3.57843945  | 4.87343465  | 4.7359849   | 4.69059965  | 4.74263775  | 5.07242105  | 4.79677905  |
| "Ppt2"       | 7.6887484   | 7.7121267   | 7.884879    | 7.81208     | 7.824856    | 7.653392    | 7.7043314   | 7.800117    |
| "Pptc7"      | 10.741747   | 9.8665085   | 11.004891   | 11.702765   | 10.786645   | 9.557848    | 10.860414   | 11.553488   |
| "Pqbp1"      | 7.608773    | 7.22404275  | 7.7342155   | 7.64344975  | 7.533087    | 7.4160796   | 7.71566105  | 7.7437209   |
| "Pqlc1"      | 8.83992475  | 7.2552036   | 7.339765    | 7.31003335  | 7.8899968   | 7.3329362   | 7.9357193   | 7.466213    |
| "Pqlc2"      | 4.2178597   | 4.2909427   | 4.391223    | 4.498556    | 4.2999225   | 4.4525223   | 3.9919324   | 4.3563685   |
| "Pqlc3"      | 3.0246985   | 3.333487    | 4.3253417   | 3.5606637   | 3.3580341   | 3.463025    | 3.3592331   | 3.4957592   |
| "Praf2"      | 2.889103    | 2.938034    | 2.9068487   | 2.986152    | 3.0814617   | 2.8728018   | 2.9881804   | 2.985879    |
| "Prame16"    | 3.1237633   | 3.3138282   | 3.1604879   | 3.2657204   | 3.16807115  | 3.1239278   | 3.15940145  | 3.2494885   |
| "Prame17"    | 2.38006195  | 2.5623397   | 2.41069515  | 2.50731805  | 2.41338725  | 2.3905422   | 2.3982275   | 2.48705005  |
| "Prap1"      | 2.4226284   | 2.530593    | 2.489203    | 2.6209288   | 2.4946485   | 2.452967    | 2.477426    | 2.595226    |
| "Prc1"       | 2.7460592   | 2.9142053   | 2.8345983   | 3.02501     | 2.862313    | 2.8174043   | 2.8333228   | 2.969411    |
| "Prcc"       | 6.8884797   | 7.364485    | 6.961884    | 7.2980423   | 7.2752147   | 7.4404325   | 6.6748185   | 7.242722    |
| "Prcp"       | 3.77047445  | 3.39476295  | 4.2022352   | 3.7396797   | 4.06129615  | 4.65414265  | 4.497448    | 3.91902415  |
| "Prdm4"      | 7.013501    | 7.6926575   | 6.928047    | 7.3332067   | 7.016341    | 7.378483    | 6.8443108   | 7.0924215   |
| "Prdm5"      | 5.9775424   | 7.112378    | 5.8862123   | 5.597313    | 5.976783    | 6.535182    | 5.460913    | 5.2165165   |
| "Prdx2"      | 9.188798    | 8.96519485  | 9.1641462   | 9.3726245   | 9.2143515   | 8.749698    | 9.341501    | 9.3013705   |
| "Prdx3"      | 10.697067   | 10.857115   | 11.247842   | 11.27653    | 11.120309   | 10.9033165  | 11.248732   | 11.326698   |
| "Prdx4"      | 6.12301325  | 5.80939285  | 6.28214975  | 6.05718185  | 5.885319    | 5.6879437   | 6.0354803   | 6.23046415  |
| "Prdx5"      | 10.201424   | 10.081652   | 10.304712   | 10.562817   | 10.261      | 10.034131   | 10.2975445  | 10.319269   |
| "Preb"       | 7.50864715  | 7.6006285   | 7.73219     | 7.611407    | 7.5802198   | 7.57217645  | 7.76578385  | 7.470454    |
| "Prelid1"    | 3.0443995   | 3.13063805  | 3.2237183   | 3.1474085   | 3.137623    | 3.08613075  | 3.11086285  | 3.12296285  |
| "Prelp"      | 5.0408335   | 4.1041504   | 5.2516053   | 5.07970045  | 5.2162406   | 4.94148625  | 4.97511425  | 5.3292221   |
| "Prep"       | 6.8527975   | 6.8388786   | 6.99157     | 6.905923    | 6.905204    | 6.638008    | 7.0291524   | 7.0431905   |
| "Prepl"      | 4.3672746   | 3.806025167 | 4.394944033 | 4.408618633 | 4.737328733 | 3.982880667 | 4.496701667 | 4.1937481   |
| "Prg2"       | 2.3539948   | 2.4002678   | 2.3627462   | 2.4473948   | 2.360961    | 2.3629856   | 2.3520632   | 2.4435837   |
| "Prg4"       | 9.756087    | 8.495993    | 10.416578   | 8.723459    | 8.573932    | 9.772608    | 8.159394    | 9.167059    |
| "Prickle1"   | 5.5532265   | 5.34159     | 5.5045195   | 5.3483934   | 6.10837     | 5.7137337   | 5.851816    | 5.7705245   |
| "Prickle4"   | 8.69998375  | 9.16841125  | 9.08188315  | 9.01979765  | 8.8993244   | 8.9723963   | 9.12193775  | 8.91699175  |
| "Prim1"      | 3.11788775  | 3.18562865  | 3.1534073   | 3.2413869   | 3.15575185  | 3.61402775  | 3.48444015  | 3.25181275  |
| "Prim2"      | 2.8797177   | 2.985538    | 2.9431875   | 3.03659435  | 2.970087    | 3.44153815  | 3.009236    | 2.97603795  |
| "Prkab1"     | 5.928412    | 6.058877    | 5.521818    | 5.2285557   | 6.1225286   | 6.3058634   | 5.782023    | 5.5600514   |
| "Prkaca"     | 5.687407    | 5.970071    | 6.351383    | 6.4034452   | 5.852654    | 5.206598    | 6.7584743   | 6.7832333   |
| "Prkacb"     | 5.0913093   | 6.11200375  | 5.354998    | 5.74636285  | 5.3671106   | 6.18889145  | 5.24957595  | 5.252995    |
| "Prkag1"     | 6.5488068   | 6.66640585  | 6.54171515  | 6.8464937   | 6.61772585  | 6.307863    | 6.7022505   | 6.80043935  |
| "Prkag2"     | 4.1629872   | 4.0662168   | 4.318104067 | 4.4503656   | 4.274021667 | 4.289618    | 4.4787615   | 4.8703038   |
| "Prkar1a"    | 9.826731    | 8.6088403   | 9.155766    | 8.982717    | 9.107343    | 9.1318055   | 9.4895435   | 9.2322352   |
| "Prkar1b"    | 2.7262633   | 2.8786943   | 2.846911    | 2.943896    | 3.0695422   | 2.7318501   | 3.0690446   | 2.9444132   |

|           |             |             |             |             |             |             |             |             |
|-----------|-------------|-------------|-------------|-------------|-------------|-------------|-------------|-------------|
| "Prkar2a" | 2.5136786   | 2.5373366   | 2.5107248   | 3.8345718   | 2.5086687   | 2.4623175   | 2.5219092   | 2.9351308   |
| "Prkca"   | 4.30746235  | 5.2423177   | 4.3330868   | 4.7107168   | 4.4779363   | 4.6849314   | 4.4533375   | 4.50625415  |
| "Prkcb"   | 3.8822551   | 3.39562675  | 3.9193777   | 3.89971475  | 3.88134625  | 5.7484722   | 3.97614985  | 3.63011015  |
| "Prkcd"   | 5.7009664   | 6.311718    | 5.4715533   | 5.520965    | 5.393777    | 6.8409243   | 5.396683    | 4.9644006   |
| "Prkcdbp" | 6.2780294   | 5.9596934   | 7.869965    | 6.497393    | 6.804624    | 6.2614465   | 6.925257    | 6.4978595   |
| "Prkce"   | 3.72929965  | 4.7158102   | 3.91421615  | 4.1579422   | 4.1096921   | 4.3160224   | 4.1485184   | 4.41660885  |
| "Prkch"   | 3.349139    | 3.1111517   | 2.63987     | 2.808758    | 3.1999443   | 3.5433385   | 3.0698075   | 3.0307748   |
| "Prkci"   | 6.5977383   | 6.265431    | 6.77808     | 5.96889     | 7.3320394   | 6.8455787   | 6.96457     | 6.4740095   |
| "Prkck"   | 7.523691    | 7.9805946   | 8.022294    | 7.811523    | 7.68051     | 7.249857    | 8.455333    | 7.9929557   |
| "Prkcsh"  | 8.262775    | 7.687848    | 7.580804    | 7.257943    | 7.8274727   | 7.6708307   | 7.5482626   | 7.135644    |
| "Prkcz"   | 2.2710478   | 2.2728004   | 2.2834198   | 2.2951849   | 2.3501952   | 2.2368424   | 2.4593866   | 2.3112323   |
| "Prkd1"   | 4.459409    | 4.9004545   | 4.128033    | 4.420641    | 5.4764094   | 5.2933807   | 4.835333    | 4.859418    |
| "Prkd2"   | 3.78887774  | 3.93903856  | 3.7935057   | 3.9330277   | 4.1705854   | 4.74469254  | 4.1017914   | 4.21622062  |
| "Prkd3"   | 6.8828725   | 7.2233586   | 6.8947904   | 6.55556685  | 7.48343     | 7.30948305  | 6.7410543   | 6.7633027   |
| "Prkdc"   | 5.3761616   | 6.0186596   | 6.1763124   | 5.9486356   | 5.537081    | 5.666828    | 6.2097764   | 5.7753973   |
| "Prkg1"   | 4.2473097   | 3.7300591   | 5.819997    | 7.458699    | 6.318511    | 4.0527225   | 5.79902     | 7.6096625   |
| "Prkg2"   | 2.7030785   | 2.90915     | 2.8047206   | 3.299818    | 2.8157666   | 3.7281842   | 2.7954402   | 2.9906814   |
| "Prkra"   | 4.7340937   | 3.4290686   | 4.7780657   | 3.985788    | 4.7241173   | 4.7815924   | 5.193432    | 4.59444     |
| "Prkrip1" | 7.1511908   | 7.3265605   | 6.905117    | 7.1707177   | 7.1985607   | 7.4673805   | 7.227082    | 7.1014085   |
| "Prkrir"  | 9.8158675   | 10.735634   | 10.6140705  | 10.8445365  | 10.093349   | 9.9218965   | 10.2798815  | 10.5768935  |
| "Prkx"    | 4.5385725   | 4.479818567 | 4.8005655   | 4.7154509   | 4.6728005   | 4.7812245   | 5.06908     | 4.722982233 |
| "Pri"     | 2.5692627   | 2.6902316   | 2.6010485   | 2.6630785   | 2.5995831   | 2.5369983   | 2.5937848   | 2.6643338   |
| "Pri2b1"  | 3.02892415  | 3.2953834   | 3.09281635  | 3.2376169   | 3.0993738   | 3.05541555  | 3.0602173   | 3.144709    |
| "Pri2c2"  | 2.495786    | 2.643155    | 2.5046494   | 2.544677    | 2.5049875   | 2.4437869   | 2.5022302   | 2.5634308   |
| "Pri3b1"  | 2.6468034   | 2.835713    | 2.7033038   | 2.871957    | 2.724188    | 2.6498613   | 2.7049582   | 2.8436015   |
| "Pri3c1"  | 2.383746    | 2.4577956   | 2.418154    | 2.5184386   | 2.4183023   | 2.36175     | 2.4172475   | 2.5053003   |
| "Pri3d1"  | 2.88301135  | 3.0137054   | 2.93490515  | 3.10764145  | 2.9415058   | 2.859869    | 2.91666855  | 3.0182736   |
| "Pri5a1"  | 2.3582876   | 2.4563844   | 2.4042544   | 2.5188775   | 2.4103255   | 2.3675249   | 2.4029872   | 2.5050058   |
| "Pri6a1"  | 2.5034318   | 2.582684    | 2.538015    | 2.6457148   | 2.5455775   | 2.4992967   | 2.5370011   | 2.6187735   |
| "Pri7a1"  | 2.4020638   | 2.4973989   | 2.4495547   | 2.560588    | 2.4619133   | 2.3987012   | 2.4459946   | 2.5464325   |
| "Pri7a2"  | 2.5392072   | 2.6754222   | 2.596099    | 2.7301748   | 2.6014318   | 2.5425196   | 2.5900612   | 2.7207146   |
| "Pri7c1"  | 2.2954054   | 2.3792198   | 2.3574584   | 2.4391289   | 2.3875418   | 2.2928486   | 2.3396943   | 2.4271917   |
| "Pri7d1"  | 2.3629599   | 2.4464097   | 2.3958557   | 2.5116057   | 2.399612    | 2.3686504   | 2.3967032   | 2.511157    |
| "Pri8a6"  | 2.8283725   | 2.9798045   | 2.866345    | 2.9981728   | 2.8829703   | 2.833912    | 2.8631754   | 2.9894068   |
| "Pri8a8"  | 2.3746963   | 2.4455473   | 2.4100783   | 2.5264058   | 2.4114873   | 2.3781204   | 2.4103048   | 2.4941695   |
| "Prlr"    | 3.5044306   | 2.39221032  | 2.34658832  | 2.43571614  | 2.35216626  | 2.3183642   | 2.3495549   | 2.4209632   |
| "Prm1"    | 2.7107384   | 2.8801308   | 2.78505133  | 2.9680545   | 2.7936166   | 2.723499    | 2.776866267 | 2.894261633 |
| "Prm2"    | 2.3721828   | 2.4465694   | 2.4223657   | 2.4843407   | 2.4337301   | 2.4126782   | 2.4318438   | 2.484722    |
| "Prm3"    | 2.4367476   | 2.493071    | 2.6180696   | 2.5491266   | 2.4639935   | 2.3752      | 2.4578369   | 2.5417867   |
| "Prmt1"   | 9.714674    | 9.653876    | 10.522844   | 10.123064   | 9.540593    | 9.324192    | 10.609894   | 10.066877   |
| "Prmt2"   | 3.85853025  | 3.5432409   | 4.4366781   | 4.28567365  | 3.8520486   | 3.89858915  | 5.31604075  | 4.29952895  |
| "Prmt3"   | 5.38625705  | 5.54280435  | 5.66975925  | 5.71558415  | 5.4561653   | 5.41896035  | 5.600292    | 5.6000271   |
| "Prmt5"   | 7.474151    | 8.062981    | 7.54181     | 7.6256227   | 7.6974926   | 7.5880527   | 7.606448    | 7.6440177   |
| "Prmt6"   | 2.654598    | 2.7278862   | 2.687646    | 2.8325386   | 2.6864338   | 2.6588197   | 2.6584835   | 2.7919912   |
| "Prmt7"   | 4.83818535  | 5.64264595  | 5.0526052   | 5.0712212   | 4.996134    | 4.8490215   | 5.0942653   | 5.0490987   |
| "Prnp"    | 9.3441735   | 6.8895655   | 10.150885   | 9.6074285   | 9.5935385   | 8.968621    | 9.7531715   | 9.7289955   |
| "Proc"    | 8.175514    | 2.785396    | 2.7318187   | 2.844026    | 2.731201    | 2.6606293   | 2.707891    | 2.8288517   |
| "Procr"   | 8.147075    | 8.804962    | 8.084154    | 8.406873    | 9.509192    | 10.236461   | 8.007016    | 8.521716    |
| "Prodh"   | 7.766694    | 6.951004    | 5.477513    | 5.8931437   | 7.558644    | 6.9095187   | 6.8982577   | 5.5743165   |
| "Prodh2"  | 5.509754    | 2.2094154   | 2.186838    | 2.2769358   | 2.1892684   | 2.1647112   | 2.185982    | 2.270451    |
| "Prok2"   | 2.32626285  | 2.4146787   | 2.3567815   | 2.4641619   | 2.362283    | 2.32653715  | 2.3554757   | 2.4373127   |
| "Prokr1"  | 2.7944283   | 2.8868167   | 2.9924335   | 3.083509    | 2.8526607   | 2.7941532   | 2.8445687   | 3.049911    |
| "Prol1"   | 2.5862156   | 2.703671    | 2.6423663   | 2.7638144   | 2.64364115  | 2.62149855  | 2.6230804   | 2.7340804   |
| "Prom1"   | 5.9471836   | 8.240395    | 5.806593    | 5.9473114   | 7.602223    | 7.7408495   | 4.268857    | 5.972801    |
| "Prom2"   | 2.4127574   | 2.5049157   | 2.4713817   | 2.5735674   | 2.4837875   | 2.4652748   | 2.4751492   | 2.5782316   |
| "Pros1"   | 8.156528    | 6.431841    | 7.567559    | 6.99005     | 7.578304    | 7.7537894   | 7.5531435   | 7.301922    |
| "Prosc"   | 9.817233    | 10.01634    | 9.012976    | 9.398713    | 9.734336    | 9.88076     | 9.038799    | 9.309441    |
| "Proz"    | 4.7380449   | 2.52670445  | 2.4805708   | 2.56350125  | 2.4748993   | 2.43073965  | 2.47166135  | 2.5561541   |
| "Prp2"    | 2.7176576   | 2.9760835   | 2.807836    | 2.9629743   | 2.8205762   | 2.7346964   | 2.7921505   | 2.899498    |
| "Prpf19"  | 10.898188   | 10.619462   | 10.8649395  | 10.76962433 | 10.81747883 | 10.354723   | 10.961706   | 10.78085367 |
| "Prpf3"   | 5.973744    | 6.443434    | 5.9857063   | 6.035858    | 5.812139    | 5.9617276   | 5.836116    | 6.042188    |
| "Prpf31"  | 5.36499185  | 6.14641765  | 5.9427512   | 6.246135    | 5.7350166   | 5.56373485  | 5.5590348   | 5.8094325   |
| "Prpf38a" | 6.7939925   | 7.605937    | 7.037152    | 6.919821    | 7.3760285   | 7.2934217   | 7.1125655   | 7.063807    |
| "Prpf38b" | 7.6653042   | 8.4378505   | 7.81023355  | 7.61591385  | 8.137784    | 8.6809925   | 8.048557    | 7.7718194   |
| "Prpf39"  | 5.9978469   | 6.010545767 | 5.854781167 | 6.035970333 | 6.0517809   | 6.683002    | 5.879975633 | 6.0856181   |
| "Prpf40a" | 6.804842433 | 7.431494767 | 6.8858182   | 7.107741767 | 6.864106    | 7.318325067 | 6.825456233 | 7.133300333 |
| "Prpf40b" | 5.754768    | 6.424241    | 6.087499    | 6.201928    | 5.8595247   | 6.0504847   | 6.40964     | 6.1888695   |
| "Prpf4b"  | 6.02150175  | 6.412818133 | 6.066115333 | 6.142740817 | 6.306312817 | 6.687041283 | 6.110138567 | 6.373471    |
| "Prpf6"   | 6.3558518   | 6.9757818   | 5.879754133 | 5.972949933 | 6.4180647   | 6.737950267 | 6.042624    | 6.1236949   |
| "Prpf8"   | 8.284694    | 8.483426    | 8.381034    | 8.322847    | 8.282978    | 8.253925    | 8.293966    | 8.312542    |
| "Prph"    | 2.9119871   | 3.22344315  | 3.0962665   | 3.163829    | 3.14553285  | 3.039572    | 3.0531759   | 3.15606975  |
| "Prpmp5"  | 2.7983603   | 2.9879687   | 2.9289348   | 3.0566902   | 2.8983376   | 2.9093919   | 2.9250605   | 2.9931812   |
| "Prps1"   | 8.6179585   | 9.040373    | 8.93594775  | 9.0520955   | 8.9340315   | 8.9301165   | 8.821833    | 9.0456115   |
| "Prps1l3" | 7.94199625  | 8.065162    | 8.3588362   | 8.452992    | 7.75078325  | 8.09314585  | 8.0018645   | 8.622378    |
| "Prps2"   | 3.4757948   | 3.6527731   | 3.5501022   | 3.585167    | 3.5115337   | 3.5056438   | 3.4816725   | 3.6273065   |
| "Prpsap1" | 7.6015153   | 7.203333    | 7.1402354   | 7.1117454   | 7.6160417   | 7.6364856   | 7.4238243   | 7.1215434   |
| "Prpsap2" | 4.5965066   | 5.1650486   | 5.1219015   | 4.5957575   | 5.1590166   | 5.2442055   | 4.9777822   | 4.487364    |
| "Prr12"   | 3.2185102   | 3.3996437   | 3.4129004   | 3.5414042   | 3.3725967   | 2.8750682   | 3.3821166   | 3.626446    |
| "Prr13"   | 8.651781    | 8.594746    | 8.704677    | 8.425936    | 8.101581    | 8.980083    | 8.604496    | 8.631445    |
| "Prr14"   | 8.212167    | 8.685624    | 7.650533    | 7.620958    | 8.651451    | 8.713121    | 7.8027124   | 8.021415    |
| "Prr15"   | 2.812902    | 2.75004945  | 2.87128485  | 2.9543409   | 3.135319    | 2.58704575  | 3.1106891   | 2.99735565  |

|           |             |             |             |             |             |             |             |             |
|-----------|-------------|-------------|-------------|-------------|-------------|-------------|-------------|-------------|
| "Prr3"    | 2.7701952   | 2.5175407   | 2.4943907   | 2.5485218   | 2.5016234   | 2.6928682   | 2.4928794   | 2.5644147   |
| "Prrc1"   | 8.359203    | 8.155516    | 6.992709    | 7.1331835   | 8.398082    | 8.371026    | 7.171947    | 7.062283    |
| "Prrc2a"  | 3.7906314   | 4.0027586   | 4.268975    | 4.26983405  | 3.7171581   | 3.99495435  | 4.4588386   | 4.0863036   |
| "Prrg2"   | 3.81610325  | 3.7409997   | 3.9878394   | 4.0526988   | 3.6307745   | 3.6419896   | 3.66921005  | 3.9044015   |
| "Prrx1"   | 5.03709805  | 5.110987675 | 5.7600532   | 5.94524545  | 5.3666784   | 4.615323675 | 5.56506255  | 5.872632775 |
| "Prrx2"   | 2.2645385   | 2.3043811   | 3.2023132   | 2.35338     | 2.2827635   | 2.2283912   | 2.282862    | 2.3517885   |
| "Prss12"  | 2.8282583   | 2.841546    | 3.163922    | 2.9106884   | 3.520847    | 2.8749537   | 2.8729913   | 2.9191997   |
| "Prss2"   | 5.26433915  | 3.557565325 | 3.5103856   | 3.583112225 | 3.51713715  | 3.355788375 | 3.468521675 | 3.576937625 |
| "Prss21"  | 2.4382741   | 2.5334597   | 2.4559362   | 2.5727596   | 2.5015326   | 2.4177086   | 2.4564466   | 2.582932    |
| "Prss22"  | 2.406541    | 2.6730883   | 2.4357646   | 2.552548    | 2.4392765   | 2.3550017   | 2.4350882   | 2.5237799   |
| "Prss23"  | 9.384808    | 8.8077785   | 10.4506775  | 10.405087   | 9.625058    | 8.661927    | 9.7326865   | 10.35973925 |
| "Prss29"  | 2.40708685  | 2.5658636   | 2.69350865  | 2.54988255  | 2.461601    | 2.4764925   | 2.4468905   | 2.54362605  |
| "Prss3"   | 2.4517214   | 2.5539155   | 2.4930925   | 2.616827    | 2.4985447   | 2.4553723   | 2.4894724   | 2.5992317   |
| "Prss35"  | 2.742531    | 2.9315605   | 2.8355458   | 2.9897444   | 2.836713    | 2.796405    | 2.8171768   | 2.9626174   |
| "Prss39"  | 2.5195885   | 2.5817318   | 2.5357945   | 2.602667    | 2.5389252   | 2.5131173   | 2.542921    | 2.6047924   |
| "Prss40"  | 2.6753044   | 2.8404808   | 2.7416332   | 2.828385    | 2.7587109   | 2.708816    | 2.745379    | 2.819234    |
| "Prss44"  | 2.40447     | 2.5161471   | 2.4568396   | 2.5469098   | 2.4575586   | 2.40761     | 2.4566033   | 2.5351787   |
| "Prss58"  | 2.5316317   | 2.6892961   | 2.58000295  | 2.7485962   | 2.58971085  | 2.5388608   | 2.582161    | 2.6931238   |
| "Prtn3"   | 5.969288    | 2.888621    | 2.92258     | 2.461446    | 3.101338    | 3.3875957   | 2.3975472   | 2.437425    |
| "Prune"   | 6.6446667   | 7.9787197   | 6.739503    | 6.7711844   | 7.1686945   | 7.6712413   | 6.2219863   | 6.771973    |
| "Prx"     | 6.3089037   | 6.121626    | 6.7434587   | 5.8324423   | 7.2144275   | 5.476       | 6.7959585   | 6.575408    |
| "Psap"    | 10.414251   | 10.28651275 | 10.6179215  | 10.579601   | 10.681099   | 10.883188   | 10.6921485  | 10.5442685  |
| "Psap11"  | 2.3917065   | 2.7200537   | 3.9996774   | 2.4537857   | 2.3973255   | 2.358501    | 2.386312    | 2.4463677   |
| "Pscs"    | 2.3119783   | 2.9864407   | 2.352208    | 2.4096508   | 2.3702166   | 2.321795    | 2.3470204   | 2.4103622   |
| "Psd3"    | 6.88867     | 6.574548    | 7.7644644   | 8.322302    | 6.645956    | 6.2737703   | 7.800684    | 8.083453    |
| "Psen1"   | 4.60852365  | 4.996730775 | 4.240501375 | 4.24221305  | 4.527892275 | 4.703297    | 4.372371675 | 4.353104875 |
| "Psen2"   | 8.157855    | 5.717582    | 6.2518897   | 4.9436865   | 6.0899816   | 6.618092    | 6.030021    | 5.466984    |
| "Psenen"  | 10.88977    | 10.97871    | 11.229667   | 11.065514   | 10.992204   | 10.651193   | 11.283514   | 11.041022   |
| "Psg16"   | 2.6382937   | 2.79571     | 2.6366863   | 2.7894754   | 2.6536384   | 2.6427839   | 2.6732984   | 2.7680335   |
| "Psg18"   | 2.3174922   | 2.380412    | 2.3481488   | 2.4384024   | 2.350978    | 2.3105829   | 2.3484035   | 2.4232962   |
| "Psg19"   | 2.784945233 | 3.033171967 | 2.931698033 | 3.098110567 | 2.942024133 | 2.8575859   | 2.913508867 | 3.0541657   |
| "Psg23"   | 3.2154884   | 3.337705    | 3.321081    | 3.3147902   | 3.244688    | 3.1277611   | 3.2368834   | 3.3129232   |
| "Psg28"   | 2.2806933   | 3.67002     | 2.6130185   | 2.462367    | 2.3132448   | 2.2360342   | 2.33395     | 2.4113765   |
| "Psp11"   | 6.69767125  | 6.595708    | 6.86080005  | 6.81264685  | 6.81281495  | 7.0578895   | 6.7458015   | 7.3298765   |
| "Psm1"    | 5.805363933 | 6.208926167 | 5.724366667 | 5.949284833 | 6.0112284   | 6.333002    | 5.845098    | 6.064959833 |
| "Psm2"    | 11.517915   | 11.92386    | 11.571829   | 11.47519    | 11.70042    | 12.219372   | 11.755182   | 11.49733    |
| "Psm3"    | 12.703301   | 13.008719   | 12.830024   | 12.742305   | 12.8553     | 13.05365    | 12.913952   | 12.57256    |
| "Psm4"    | 11.194155   | 11.597307   | 11.371354   | 11.157263   | 11.241864   | 11.638514   | 11.632677   | 11.06758    |
| "Psm5"    | 8.057358767 | 9.046021433 | 8.081244833 | 8.113932267 | 8.489418667 | 9.086330133 | 8.225382167 | 8.111541767 |
| "Psm6"    | 8.21129125  | 8.51249765  | 8.1728716   | 8.170544525 | 8.245188475 | 8.61181935  | 8.24535075  | 8.112912425 |
| "Psm7"    | 10.95006    | 11.2203745  | 10.754975   | 10.649742   | 10.849509   | 11.254945   | 11.446608   | 10.63518125 |
| "Psmb1"   | 6.082657867 | 6.498868367 | 6.042794267 | 6.168698767 | 6.174135833 | 6.359316167 | 6.156169133 | 6.173058533 |
| "Psmb10"  | 6.821312    | 5.633127    | 7.0917244   | 6.967808    | 7.092781    | 6.9412427   | 7.648196    | 7.142123    |
| "Psmb2"   | 9.835269    | 10.499361   | 10.106584   | 10.010288   | 10.145372   | 10.632947   | 10.133708   | 9.804827    |
| "Psmb3"   | 11.040932   | 11.6863495  | 11.320752   | 11.0743315  | 11.2836775  | 11.799104   | 11.5140645  | 11.083105   |
| "Psmb4"   | 11.9747885  | 12.2012695  | 11.910457   | 11.9256165  | 11.9611675  | 12.2124215  | 12.1375295  | 11.955601   |
| "Psmb5"   | 11.816997   | 11.862397   | 12.029591   | 11.844866   | 11.768383   | 12.051372   | 12.258992   | 11.791871   |
| "Psmb6"   | 11.699159   | 12.0465355  | 12.036505   | 11.895182   | 11.847227   | 11.784971   | 12.13058    | 11.760515   |
| "Psmb7"   | 8.456961    | 8.754044    | 8.4424925   | 8.848649    | 8.354258    | 8.643471    | 8.487999    | 8.669712    |
| "Psmb8"   | 6.2831964   | 5.0816345   | 6.238561    | 5.810139    | 6.12644     | 7.5327625   | 7.7335796   | 6.2918224   |
| "Psmb9"   | 5.1420207   | 3.2718065   | 5.7755194   | 5.5682883   | 5.6056337   | 6.970416    | 7.153467    | 5.6206446   |
| "Psmc1"   | 10.231109   | 10.808678   | 10.383786   | 10.567445   | 10.471258   | 10.906277   | 10.519789   | 10.53438    |
| "Psmc2"   | 12.134897   | 12.841669   | 12.1502365  | 12.11256    | 12.52047    | 12.8766295  | 12.4502935  | 12.225422   |
| "Psmc3"   | 11.340206   | 11.69792    | 11.588327   | 11.229279   | 11.435291   | 11.504953   | 11.7547035  | 11.312035   |
| "Psmc3ip" | 5.5684056   | 5.690906    | 5.6501994   | 5.730906    | 5.7016997   | 5.4024553   | 5.6055565   | 5.606754    |
| "Psmc4"   | 10.632592   | 11.3764255  | 10.860616   | 10.9305285  | 10.798292   | 11.512549   | 10.8190505  | 10.94081    |
| "Psmc5"   | 10.5001135  | 10.8688     | 10.603686   | 10.61917    | 10.544321   | 10.77318    | 10.996219   | 10.566208   |
| "Psmc6"   | 8.706623833 | 9.846024333 | 9.310197    | 9.6788382   | 9.2941589   | 9.653333133 | 9.143615467 | 9.708843    |
| "Psmd1"   | 11.18029    | 11.776305   | 11.201341   | 11.2573805  | 11.267236   | 11.848445   | 11.274206   | 11.168983   |
| "Psmd10"  | 7.9099817   | 7.224542    | 7.7061896   | 7.7188835   | 7.4824486   | 7.330167    | 7.947627    | 7.689129    |
| "Psmd11"  | 7.78432     | 8.231222567 | 7.321839217 | 7.28713955  | 7.784252083 | 8.205585283 | 7.640354433 | 7.276068283 |
| "Psmd12"  | 11.1350565  | 11.827206   | 11.033675   | 11.218012   | 11.398266   | 11.987305   | 11.19455    | 11.090124   |
| "Psmd13"  | 7.9056135   | 8.1407294   | 8.05974055  | 8.085091    | 7.70328985  | 8.4549595   | 8.16311075  | 8.03937875  |
| "Psmd14"  | 10.522266   | 10.771754   | 10.695327   | 10.559039   | 10.467962   | 11.068684   | 10.68246    | 10.478385   |
| "Psmd2"   | 10.895134   | 11.316942   | 10.994423   | 10.780891   | 11.026676   | 11.49972    | 11.4145155  | 10.8756075  |
| "Psmd3"   | 9.206905    | 9.727358    | 9.110894    | 8.898369    | 9.338141    | 9.807554    | 9.330547    | 8.908544    |
| "Psmd4"   | 8.358304067 | 8.611540667 | 8.093005233 | 8.033621433 | 8.374388    | 8.668225233 | 8.755829667 | 8.035545733 |
| "Psmd5"   | 7.663112    | 7.15639     | 7.3657694   | 7.1761675   | 7.618504    | 7.4525895   | 7.656753    | 7.190599    |
| "Psmd6"   | 12.379347   | 12.552752   | 12.743668   | 12.934478   | 12.475124   | 12.642708   | 12.8213115  | 12.7744915  |
| "Psmd7"   | 6.0409187   | 6.408213367 | 5.790893467 | 5.932225    | 6.057584933 | 6.094950733 | 6.0729819   | 5.916070067 |
| "Psmd8"   | 11.785312   | 12.953074   | 11.39587    | 11.796517   | 11.887592   | 12.520309   | 11.631634   | 11.351672   |
| "Psmd9"   | 6.8764      | 6.5247045   | 6.307078    | 6.600091    | 6.662494    | 6.5018907   | 6.2705626   | 6.5707803   |
| "Psme1"   | 9.174723    | 8.734742    | 9.542862    | 9.428795    | 9.502385    | 9.334729    | 9.800858    | 9.399279    |
| "Psme2"   | 9.691848    | 8.548296    | 9.9771      | 9.555275    | 9.574501    | 9.617606    | 10.793945   | 9.695622    |
| "Psme3"   | 5.36837865  | 5.50320445  | 5.52174045  | 5.8458007   | 5.4318595   | 5.48044955  | 5.7526198   | 5.5981498   |
| "Psme4"   | 10.68028883 | 11.32315267 | 10.74746267 | 11.05187733 | 11.0266165  | 11.96967933 | 11.01324117 | 10.998177   |
| "Psmf1"   | 6.046342667 | 6.874899967 | 5.844992167 | 5.830049    | 6.284816667 | 6.1889544   | 5.8900179   | 6.161013933 |
| "Psmg1"   | 7.439541    | 7.1677713   | 8.030396    | 7.990535    | 7.3934026   | 7.0002675   | 8.305546    | 7.8044724   |
| "Psmg2"   | 8.232782    | 8.364287    | 8.806172    | 8.898002    | 8.4890655   | 8.018914    | 8.761967    | 9.0173635   |
| "Psmg3"   | 6.0234814   | 6.426799    | 5.6736813   | 5.800363    | 5.7922654   | 6.47287     | 6.071522    | 5.645602    |
| "Psmg4"   | 4.1267786   | 3.9604073   | 3.68465     | 3.7182038   | 3.4200613   | 3.7047205   | 4.3690653   | 3.1809838   |

|           |             |             |             |             |             |             |             |             |
|-----------|-------------|-------------|-------------|-------------|-------------|-------------|-------------|-------------|
| "Pspc1"   | 6.2929754   | 6.8950195   | 6.58221     | 6.065284    | 6.179719    | 6.823273    | 6.6018286   | 6.5612283   |
| "PspH"    | 6.4973235   | 6.399685    | 7.825032    | 7.5807915   | 6.202481    | 6.068109    | 7.528521    | 7.3295703   |
| "Psrc1"   | 3.3780522   | 3.7552354   | 3.4817767   | 3.725269    | 3.5364442   | 3.4053128   | 3.479219    | 3.621996    |
| "Pstk"    | 5.20157015  | 5.4950355   | 5.7879244   | 5.996654    | 5.54372985  | 5.0972638   | 5.46267875  | 5.9598934   |
| "Pstpip1" | 2.54466     | 2.4997478   | 2.703064    | 2.5885544   | 2.565761    | 2.9691665   | 2.565401    | 2.5983171   |
| "Pstpip2" | 7.8701408   | 8.977324    | 8.14733233  | 8.3618482   | 7.963045433 | 8.547087    | 8.090733867 | 8.184532867 |
| "Ptafr"   | 2.4789343   | 2.585134    | 2.5208607   | 2.6449351   | 2.5224843   | 2.4760325   | 2.5198312   | 2.6343265   |
| "Ptbp1"   | 4.74878375  | 4.39745165  | 4.59672475  | 4.26751235  | 4.51035485  | 4.92110945  | 4.58300215  | 4.34201695  |
| "Ptbp2"   | 5.59395325  | 6.139286    | 5.55570915  | 5.6326245   | 5.7416216   | 5.60147875  | 5.4010673   | 5.64583165  |
| "Ptcd1"   | 5.2840672   | 5.5824352   | 4.57738185  | 4.93047545  | 5.2498505   | 5.3971818   | 4.665158    | 5.240487    |
| "Ptcd2"   | 7.365778    | 7.028958    | 7.2803216   | 7.4804735   | 7.2219753   | 6.6271195   | 7.7624645   | 7.3296304   |
| "Ptcd3"   | 9.0087805   | 8.816386    | 9.410737    | 9.618381    | 9.354714    | 8.977092    | 9.232123    | 9.585213    |
| "Ptch1"   | 8.094269    | 8.533145    | 7.537479    | 7.6842427   | 8.638326    | 8.102104    | 8.042706    | 8.272711    |
| "Ptch2"   | 2.4483218   | 2.4871187   | 2.460857    | 2.5372577   | 2.459332    | 2.4306207   | 2.4577672   | 2.5289361   |
| "PtcrA"   | 2.4542494   | 2.5129535   | 2.4803853   | 2.5480487   | 2.4816418   | 2.450846    | 2.480466    | 2.5453453   |
| "Ptcss1"  | 5.852202133 | 5.4145511   | 5.902379533 | 6.1415441   | 5.817267733 | 5.448668767 | 6.056699833 | 6.137292233 |
| "Ptcss2"  | 5.657894183 | 5.7648431   | 5.624284667 | 5.5566999   | 5.780532367 | 5.583287833 | 5.889579233 | 5.622502567 |
| "Pten"    | 8.243771433 | 7.5436931   | 8.146683667 | 8.475040833 | 8.493065133 | 8.758868467 | 8.653917667 | 8.495322333 |
| "Pterr"   | 5.15794955  | 5.569752    | 5.6385645   | 5.80237815  | 5.74405095  | 5.13188615  | 4.8780977   | 5.72891595  |
| "Ptgdr"   | 2.1381123   | 2.4807065   | 2.1788266   | 2.2603486   | 2.1884727   | 2.1350298   | 2.1680834   | 2.2420921   |
| "Ptgds"   | 2.9617641   | 2.89959205  | 2.89123345  | 2.94022845  | 2.8554474   | 2.8120885   | 3.0464176   | 2.91931595  |
| "Ptger2"  | 2.5445518   | 2.6929677   | 2.6818805   | 2.7373135   | 2.7987287   | 4.1982536   | 2.6851509   | 2.737518    |
| "Ptger3"  | 2.49640025  | 2.70628335  | 2.85214075  | 2.68075525  | 3.095101    | 2.5098989   | 3.8037467   | 2.80053855  |
| "Ptger4"  | 3.7971665   | 4.39064815  | 4.3738614   | 4.644192    | 4.402744    | 4.92127015  | 4.53025615  | 4.7440108   |
| "Ptges"   | 2.3098726   | 2.351563    | 2.8988564   | 2.3826532   | 2.353026    | 2.3015876   | 4.3345175   | 2.3668914   |
| "Ptges2"  | 7.7497435   | 7.900878    | 7.9924946   | 8.114939    | 7.967581    | 7.628635    | 8.068518    | 8.042807    |
| "Ptgfr"   | 2.4483366   | 2.557353    | 2.4960558   | 2.6226592   | 2.4981945   | 2.4475477   | 2.4945889   | 2.608626    |
| "Ptgir"   | 3.1269646   | 3.4829478   | 3.616057    | 3.5491557   | 3.4516547   | 3.7110045   | 3.4704444   | 3.6442614   |
| "Ptgis"   | 6.404347    | 6.0292764   | 6.858892    | 6.8664894   | 6.5803742   | 6.409147    | 5.795591    | 7.001591    |
| "Ptgr1"   | 5.314563    | 5.038415    | 6.523907    | 4.8130956   | 5.886962    | 4.8465424   | 5.334464    | 5.331044    |
| "Ptgr2"   | 5.604373433 | 4.478608933 | 5.770943133 | 6.436401033 | 5.742526733 | 4.945776067 | 6.0472065   | 6.442403333 |
| "Ptgs1"   | 5.429726    | 4.908378    | 4.820694    | 4.47805615  | 4.6983684   | 5.4363243   | 4.6052432   | 4.3826616   |
| "Ptgs2"   | 2.5514173   | 2.66664205  | 2.603243    | 2.73269965  | 2.61463655  | 2.54508805  | 2.60514035  | 2.70745125  |
| "Pth1r"   | 2.7764773   | 3.0052176   | 3.306769    | 3.0430455   | 3.0131574   | 3.3443334   | 3.2565086   | 3.039041    |
| "Pth2"    | 1.997565    | 2.3731053   | 2.3628607   | 2.4144795   | 2.3639793   | 2.3490064   | 2.3637137   | 2.4284608   |
| "Pthlh"   | 3.0372762   | 3.23590565  | 4.7767502   | 5.21039055  | 3.14604865  | 3.38743545  | 3.06997     | 4.0090016   |
| "PtK2"    | 5.50308985  | 5.9041722   | 5.6797861   | 5.8740588   | 5.62346335  | 5.7994551   | 5.6876885   | 5.80010875  |
| "PtK2b"   | 2.969035    | 2.9185152   | 2.9218826   | 2.9722884   | 3.0736957   | 3.0988777   | 2.919073    | 2.9671478   |
| "PtK6"    | 2.3739524   | 2.4669259   | 2.4146886   | 2.529998    | 2.4196613   | 2.37364     | 2.4190462   | 2.5164442   |
| "Ptms"    | 4.716604333 | 4.280369333 | 4.6424609   | 4.509518033 | 4.616021133 | 4.578408167 | 4.7538759   | 4.47788     |
| "Ptn"     | 2.7266408   | 2.8705045   | 4.86469465  | 4.13992405  | 2.8268779   | 2.481124635 | 2.7572786   | 4.1273888   |
| "Ptov1"   | 7.1225182   | 7.85206575  | 7.86913065  | 7.5148237   | 7.4319375   | 6.91539825  | 7.71228925  | 7.2495567   |
| "Ptp4a2"  | 11.89955533 | 12.27523833 | 12.62343233 | 12.65315233 | 11.963855   | 11.71666667 | 12.32052967 | 12.65365333 |
| "Ptp4a3"  | 7.90624275  | 9.979108    | 8.1790793   | 8.39182275  | 9.10244335  | 8.6119783   | 7.76770235  | 8.375149    |
| "Ptpla"   | 9.727942    | 8.976655    | 12.191542   | 11.948044   | 10.12673    | 9.589021    | 11.053446   | 11.760967   |
| "Ptplad1" | 9.433654    | 9.2704595   | 7.6052077   | 7.278382    | 8.1187      | 9.4701935   | 7.820103    | 7.1798113   |
| "Ptplad2" | 4.307202    | 2.1377542   | 4.773614    | 3.7625449   | 4.268007    | 4.560376    | 4.169758    | 4.599682    |
| "Ptplb"   | 7.7417297   | 6.3931875   | 6.964766    | 5.229282    | 8.609944    | 9.592582    | 8.611973    | 6.4821224   |
| "Ptptm1"  | 9.250481    | 9.289698    | 9.592804    | 9.853443    | 8.99845     | 9.029828    | 9.222482    | 9.689411    |
| "Ptptn1"  | 6.8432592   | 7.491004    | 6.5741935   | 6.5807135   | 6.50890485  | 7.69708125  | 6.54835765  | 6.224228    |
| "Ptptn11" | 6.383056467 | 7.283413933 | 6.5340376   | 6.811276433 | 6.5548219   | 7.1642925   | 6.515331867 | 6.688166667 |
| "Ptptn12" | 7.86646015  | 7.407351875 | 7.348936825 | 7.351389875 | 7.87814255  | 8.026217075 | 7.774827425 | 7.3991615   |
| "Ptptn13" | 3.7557857   | 4.1324763   | 4.0626187   | 3.8971117   | 3.9367585   | 3.8020122   | 3.7195752   | 3.9228997   |
| "Ptptn14" | 3.7688917   | 3.09933235  | 3.04226615  | 3.1478201   | 3.07847545  | 2.90074825  | 3.63240365  | 3.1252388   |
| "Ptptn18" | 4.2047      | 3.6621113   | 5.100009    | 3.7200596   | 4.5788465   | 6.4814973   | 4.9491134   | 3.7217975   |
| "Ptptn2"  | 7.0252301   | 7.2167388   | 6.628432867 | 6.572019667 | 6.625503833 | 7.177847933 | 6.632070533 | 6.5173618   |
| "Ptptn20" | 2.6721015   | 2.767727    | 2.6934838   | 2.8166318   | 2.707642    | 2.6633873   | 2.695846    | 2.8079133   |
| "Ptptn21" | 5.916545467 | 6.271345367 | 6.534402567 | 6.454146633 | 5.909048833 | 5.802899267 | 6.356388067 | 6.301010567 |
| "Ptptn22" | 2.5386605   | 2.5545835   | 2.5533017   | 2.5982103   | 2.5419314   | 6.4239044   | 2.5383368   | 2.5987537   |
| "Ptptn23" | 2.7201886   | 2.7256327   | 2.7293766   | 2.7686589   | 3.0957716   | 2.7128553   | 2.7177896   | 2.7134802   |
| "Ptptn4"  | 2.9162953   | 2.89585     | 2.756874    | 2.8306208   | 2.7616043   | 2.7542439   | 2.75642     | 2.832045    |
| "Ptptn5"  | 2.6447259   | 2.7715602   | 2.7321771   | 2.829849    | 2.7334067   | 2.6638999   | 2.72994885  | 2.81963625  |
| "Ptptn6"  | 3.39444745  | 3.4627532   | 3.4696957   | 3.58451365  | 3.4504858   | 4.52030375  | 3.4619651   | 3.52653585  |
| "Ptptn9"  | 4.6955338   | 3.9130445   | 4.937772    | 4.825611    | 4.8042374   | 4.729767    | 4.805599    | 4.488824    |
| "Ptpra"   | 6.829894    | 6.723495    | 7.2475805   | 6.9916706   | 7.3451724   | 7.219506    | 7.3487926   | 6.8850226   |
| "Ptprb"   | 8.751588    | 8.744833    | 8.556206    | 8.735573    | 8.759693    | 9.276143    | 8.663807    | 8.738659    |
| "Ptprc"   | 7.131884    | 3.7169151   | 6.5568304   | 5.428563    | 6.098307    | 9.436823    | 7.312203    | 6.1002812   |
| "Ptprcap" | 2.495297    | 2.569972    | 2.5204551   | 2.5923426   | 2.531094    | 3.159156    | 2.5187695   | 2.593162    |
| "Ptprd"   | 6.305916033 | 4.825966133 | 6.462633    | 5.491031633 | 5.7724332   | 4.9667104   | 6.495474367 | 5.903506433 |
| "Ptpre"   | 3.24671815  | 3.616411    | 4.2635214   | 3.70204635  | 3.75581265  | 4.2401664   | 3.94829045  | 3.8631043   |
| "Ptprf"   | 4.840099433 | 4.463071    | 5.090928867 | 4.114403167 | 4.656620033 | 4.469819833 | 4.5348509   | 4.312044767 |
| "Ptprg"   | 5.7497864   | 6.0895143   | 5.3743587   | 5.3727      | 5.502379    | 5.4336486   | 5.3371234   | 4.988877    |
| "Ptprj"   | 3.1053034   | 2.71063525  | 2.8188605   | 2.909412    | 2.8188505   | 2.99998465  | 2.8178538   | 2.9101876   |
| "Ptprk"   | 2.987180633 | 2.655472767 | 2.7382528   | 2.693581033 | 2.641558933 | 2.622995633 | 2.680209433 | 2.763560733 |
| "Ptprm"   | 7.270226    | 7.39088     | 7.612169    | 7.472933    | 8.084602    | 7.948481    | 7.7217064   | 7.639831    |
| "Ptpro"   | 2.6423693   | 2.9319434   | 2.975523    | 3.006564    | 2.9768085   | 3.1708775   | 3.3813443   | 2.9943998   |
| "Ptprrr"  | 2.8655891   | 2.8536575   | 2.89057     | 2.9961317   | 3.5560853   | 2.89658     | 2.9246492   | 2.9334915   |
| "Ptprs"   | 4.3720293   | 3.439461    | 7.1705627   | 6.7533245   | 5.0449824   | 4.451969    | 6.178304    | 6.592531    |
| "Ptpru"   | 2.759091    | 2.800244    | 2.7523556   | 2.7852514   | 2.7692356   | 2.750286    | 2.7545779   | 2.7870624   |
| "Ptprz1"  | 2.6525404   | 2.7695905   | 2.7084708   | 2.8643132   | 2.7147965   | 2.63532355  | 2.70211995  | 2.7931187   |
| "Ptrf"    | 4.7414069   | 4.742020667 | 4.973991    | 4.904851733 | 4.911219333 | 4.881329633 | 4.9631396   | 4.9735501   |

|             |             |             |             |             |             |             |             |             |
|-------------|-------------|-------------|-------------|-------------|-------------|-------------|-------------|-------------|
| "Ptrh1"     | 2.4423904   | 2.4152656   | 2.451808    | 2.4882884   | 2.5523033   | 2.393014    | 2.6713018   | 2.4831324   |
| "Ptrh2"     | 5.3431988   | 6.0414068   | 5.606625    | 5.595027    | 5.666871    | 5.8450605   | 5.4351539   | 5.50817415  |
| "Pts"       | 7.0965323   | 7.1637917   | 7.8519764   | 7.838081    | 7.3028135   | 7.0092387   | 7.8032403   | 7.8663235   |
| "Pttg1"     | 8.478536067 | 8.972537667 | 8.707505    | 8.946846467 | 9.029920567 | 8.7081621   | 9.0506501   | 9.110148667 |
| "Pttg1ip"   | 8.0480188   | 7.6248796   | 7.3592813   | 7.148891833 | 7.997470667 | 8.060994933 | 7.409320533 | 7.383758067 |
| "Ptx3"      | 3.1408994   | 3.6098282   | 7.809837    | 8.180205    | 5.0020556   | 3.1787674   | 6.8396525   | 8.192368    |
| "Puf60"     | 9.020613    | 9.640615    | 8.806028    | 8.7375555   | 8.866327    | 9.265038    | 8.817076    | 8.767277    |
| "Pum1"      | 8.1347771   | 8.347761833 | 7.804279067 | 8.100242333 | 7.962062767 | 7.937437667 | 8.051668467 | 8.094990867 |
| "Pum2"      | 7.910484033 | 8.230671467 | 8.2646577   | 8.324098233 | 8.053693567 | 8.234219867 | 8.044653967 | 8.592106467 |
| "Pura"      | 8.1331973   | 8.4477495   | 8.8752005   | 8.5708      | 8.4571278   | 8.527025    | 8.6966215   | 8.63115115  |
| "Purb"      | 6.950589533 | 7.2505121   | 7.0669772   | 7.055686433 | 7.0683035   | 7.237228    | 7.0042942   | 6.919451    |
| "Purg"      | 3.28255445  | 3.3108226   | 3.9877567   | 4.1008393   | 4.2811341   | 4.1509831   | 3.97865005  | 4.0695096   |
| "Pus1"      | 6.6288004   | 6.8260098   | 5.7641597   | 5.417037    | 6.582715    | 6.251723    | 6.0090904   | 5.399635    |
| "Pus10"     | 6.474514    | 6.508529    | 7.032374    | 7.0194836   | 7.0932455   | 6.531742    | 7.0472355   | 7.288645    |
| "Pus3"      | 5.1966641   | 5.9541235   | 5.3693492   | 5.5828823   | 5.56752685  | 5.770509    | 5.4572328   | 5.33365455  |
| "Pus7"      | 7.170466    | 7.541686    | 7.121241    | 7.258047    | 7.528736    | 7.218365    | 6.6307297   | 7.2706285   |
| "Pvalb"     | 14.648502   | 15.054844   | 15.207282   | 14.938114   | 14.959778   | 14.936549   | 14.48364    | 14.849898   |
| "Pvr"       | 5.02353918  | 4.14271102  | 4.01508314  | 3.87440852  | 3.93144872  | 4.39512508  | 4.51961038  | 3.88427176  |
| "Pvrl1"     | 2.3703573   | 2.4334388   | 2.3960385   | 2.502077    | 2.3983274   | 2.3690424   | 2.3951912   | 2.464898    |
| "Pvrl2"     | 3.34405535  | 2.78519715  | 3.1314901   | 2.9493822   | 3.05414975  | 3.06370975  | 2.89807475  | 2.9363239   |
| "Pvrl3"     | 4.09751555  | 3.258129925 | 3.93846925  | 3.860461825 | 3.65113275  | 3.4983095   | 3.677849225 | 3.82018645  |
| "Pvrl4"     | 2.274878    | 2.332715    | 2.2923722   | 2.463666    | 2.2930188   | 2.2523801   | 2.2906706   | 2.3803873   |
| "Pvt1"      | 2.048837    | 2.3840656   | 2.083149    | 2.291164    | 2.168411    | 2.484699    | 2.1687427   | 2.245843    |
| "Pwp1"      | 5.9373939   | 6.62312535  | 5.919137    | 6.0567785   | 6.089356    | 6.15992535  | 5.96062675  | 5.9866985   |
| "Pwp2"      | 6.238547    | 7.0181093   | 5.7586784   | 6.166878    | 6.1163745   | 6.3785324   | 5.587688    | 5.940984    |
| "Pxx"       | 6.346445    | 6.1109076   | 5.523676    | 5.8661      | 6.164569    | 6.9249253   | 6.1741505   | 5.991958    |
| "Pxmp2"     | 9.387637    | 9.048297    | 9.17852     | 9.026855    | 9.120339    | 8.768264    | 9.028316    | 9.182475    |
| "Pxmp3"     | 8.330486    | 8.652465    | 8.882404    | 9.020723    | 8.715464    | 8.338601    | 8.742813    | 8.965727    |
| "Pxmp4"     | 5.3278456   | 4.716931    | 5.712352    | 5.1461735   | 6.3822722   | 6.0541525   | 6.152206    | 5.4774647   |
| "Pxn"       | 6.4948651   | 6.6841609   | 6.349341967 | 6.236227133 | 6.2766635   | 6.3021283   | 6.508855833 | 6.403164333 |
| "Pycard"    | 3.7099019   | 2.95624435  | 4.6671441   | 3.05327235  | 3.7822683   | 4.5441613   | 4.2799598   | 3.00507235  |
| "Pycr1"     | 2.4828596   | 2.4269598   | 3.483362    | 2.6214914   | 2.2217607   | 2.481133    | 2.9247508   | 2.654057    |
| "Pycr2"     | 6.421251    | 6.144882    | 6.7951784   | 6.8001285   | 6.4340286   | 6.1739736   | 6.8331747   | 6.605027    |
| "Pycl1"     | 4.5019574   | 3.7369072   | 4.908441    | 4.94395     | 4.5211854   | 4.5004845   | 4.6120334   | 4.5837293   |
| "Pygb"      | 4.258511    | 4.721925    | 5.949196    | 4.6113667   | 6.114115    | 5.7477126   | 5.8287935   | 6.0515056   |
| "Pygl"      | 8.764181    | 5.0781965   | 6.162983    | 4.802223    | 7.371138    | 7.4339685   | 9.660088    | 6.0000033   |
| "Pygm"      | 12.18394    | 13.071947   | 12.910738   | 13.0395     | 12.567605   | 12.406419   | 12.507489   | 12.719119   |
| "Pygo2"     | 4.9334044   | 5.130367    | 5.2993455   | 5.1229672   | 5.127339    | 5.167951    | 5.5210943   | 4.9622746   |
| "Pyhin1"    | 2.39966085  | 2.3658645   | 2.4758283   | 2.42353085  | 2.35603415  | 6.22985695  | 3.6959764   | 2.42168995  |
| "Pyroxid1"  | 6.6153555   | 7.486756    | 6.7637167   | 6.7514505   | 6.654852    | 6.721077    | 6.9106493   | 6.7708898   |
| "Pyy"       | 2.3921442   | 2.4423366   | 2.546732    | 2.5125685   | 2.412994    | 2.3849092   | 2.4138188   | 2.4990249   |
| "Pzp"       | 12.693493   | 2.6001852   | 6.985067    | 2.8143072   | 4.700568    | 2.4953797   | 2.584497    | 4.195371    |
| "Qars"      | 7.69706795  | 7.89948905  | 7.9359836   | 7.937233175 | 7.8522991   | 7.769251875 | 7.822086    | 7.8840105   |
| "Qdpr"      | 10.310153   | 9.296484    | 10.080834   | 10.1031715  | 9.9795485   | 9.473701    | 10.17803    | 9.9795705   |
| "Qk"        | 10.01401338 | 9.6905465   | 9.58775075  | 10.11992988 | 10.06897425 | 9.764623425 | 9.8098255   | 10.35991518 |
| "Qpct"      | 4.542527    | 4.0391994   | 5.741992    | 4.571061    | 5.4534326   | 5.082304    | 4.406078    | 5.0683994   |
| "Qpctl"     | 2.8194299   | 2.9165282   | 2.8233335   | 2.9395244   | 2.8408573   | 2.8015604   | 2.8242772   | 2.9287643   |
| "Qprt"      | 2.770928    | 1.87384335  | 1.87153345  | 1.9205706   | 1.8627213   | 1.85161615  | 1.86330085  | 1.9168586   |
| "Qrich1"    | 8.759895    | 9.128994    | 8.997219    | 9.225466    | 9.116544    | 9.087346    | 9.1730175   | 9.059044    |
| "Qrs11"     | 7.23325235  | 6.8400185   | 7.54918525  | 8.289042    | 7.09659195  | 6.3533764   | 7.3127555   | 8.24312585  |
| "Qser1"     | 7.2290384   | 8.1571018   | 8.79575     | 9.336325667 | 7.91715     | 7.5412037   | 8.297224767 | 9.380738333 |
| "Qsox1"     | 7.0468017   | 4.05247065  | 4.0279565   | 4.0425824   | 4.28609035  | 5.0715498   | 3.89651585  | 3.933076    |
| "Qtrt1"     | 6.993225    | 7.4647155   | 6.018051    | 6.223425    | 6.981945    | 7.164748    | 6.3026466   | 6.5674534   |
| "Qtrtd1"    | 5.521956    | 6.2908297   | 5.113111    | 6.353475    | 5.9283023   | 6.1214185   | 5.7985597   | 6.519589    |
| "R3hcc1"    | 5.9703      | 6.364259    | 6.404706    | 6.219491    | 6.121115    | 5.706291    | 5.847048    | 6.073995    |
| "R3hdm1"    | 9.829001    | 10.537119   | 9.859455    | 10.310321   | 9.911502    | 10.147319   | 10.254703   | 10.103538   |
| "R74862"    | 2.3337119   | 2.3989193   | 2.3635495   | 2.4600208   | 2.3643658   | 2.3455372   | 2.3627732   | 2.4326532   |
| "Rab1"      | 10.091956   | 10.3738055  | 10.47465    | 10.4420475  | 10.4783165  | 10.5196175  | 10.40522075 | 10.4150515  |
| "Rab10"     | 10.275159   | 10.30509883 | 10.45704767 | 10.93632717 | 10.1643175  | 10.02023367 | 10.535941   | 10.73003033 |
| "Rab11a"    | 9.0778815   | 9.084869    | 9.530109    | 9.658832    | 9.273312    | 9.015006    | 9.638906    | 9.77312175  |
| "Rab11b"    | 8.150974    | 8.886665    | 8.114643    | 8.443544    | 8.693427    | 8.6859      | 8.237389    | 8.259602    |
| "Rab11fip5" | 8.296633    | 7.2913127   | 7.6160827   | 7.919073    | 8.30656     | 7.436246    | 8.0695      | 7.84281     |
| "Rab12"     | 10.518366   | 11.112371   | 10.359401   | 10.795824   | 10.805782   | 10.774769   | 10.765282   | 10.751595   |
| "Rab13"     | 4.8699064   | 4.6474886   | 4.6252737   | 4.8122506   | 4.7703066   | 4.907537    | 5.708032    | 4.812877    |
| "Rab14"     | 7.7652846   | 7.83407335  | 7.53428485  | 7.622907983 | 7.7115849   | 7.87489005  | 7.77896985  | 7.6763156   |
| "Rab15"     | 3.6818683   | 3.6122117   | 3.6384234   | 3.6567535   | 3.9649732   | 3.6017323   | 3.713258    | 3.6770716   |
| "Rab17"     | 2.86727795  | 2.4051894   | 2.3719732   | 2.46293345  | 2.3730801   | 2.33364125  | 2.36898105  | 2.4464356   |
| "Rab18"     | 8.00772675  | 7.938349    | 8.42845385  | 8.4384195   | 7.6804067   | 8.042132    | 8.27821275  | 8.1990815   |
| "Rab1b"     | 6.3124475   | 6.463996    | 6.4309835   | 6.510664    | 6.432905    | 6.2706165   | 6.6724486   | 6.447073    |
| "Rab20"     | 4.9549484   | 3.8188589   | 4.142686    | 4.207271    | 3.7680428   | 3.8800397   | 3.9332662   | 3.3705025   |
| "Rab21"     | 7.359156    | 7.3915188   | 7.7729003   | 7.903709    | 7.377613    | 7.58122065  | 7.8567615   | 7.899234    |
| "Rab22a"    | 7.0087795   | 7.254160667 | 7.3579957   | 7.263000333 | 7.0381479   | 7.037567833 | 7.282344933 | 7.271016267 |
| "Rab23"     | 3.40066155  | 3.613698    | 3.5937872   | 4.03478     | 3.5771508   | 3.4510705   | 3.57892335  | 3.84723005  |
| "Rab24"     | 9.018954    | 9.31412075  | 9.2521115   | 9.426125    | 9.0744585   | 9.0187385   | 9.3058205   | 9.465788    |
| "Rab27a"    | 2.6083257   | 2.7775888   | 2.645975    | 2.7989693   | 2.6639614   | 2.5985937   | 2.6484485   | 2.762391    |
| "Rab27b"    | 2.647385    | 2.79108895  | 2.6846894   | 2.8035531   | 2.68898915  | 2.6453154   | 2.68361105  | 2.7769371   |
| "Rab28"     | 8.68936935  | 9.086932    | 9.607865    | 9.876893    | 9.069488    | 8.6826968   | 9.34525     | 10.0198285  |
| "Rab2a"     | 8.06466384  | 8.55834482  | 8.3108364   | 8.58343132  | 8.22171376  | 8.27736812  | 8.62236526  | 8.54171922  |
| "Rab2b"     | 2.83393494  | 2.83137938  | 3.0960544   | 3.05780912  | 3.03191958  | 3.12694098  | 3.3199837   | 3.40587988  |
| "Rab30"     | 7.4909163   | 4.722667    | 3.6333158   | 4.053052    | 3.3874164   | 4.426296    | 3.5823433   | 2.7010384   |
| "Rab31"     | 4.40025975  | 3.55536435  | 4.6296489   | 3.9598305   | 4.2397866   | 4.4993799   | 4.4381893   | 4.0694187   |

|            |             |             |             |             |             |             |             |             |
|------------|-------------|-------------|-------------|-------------|-------------|-------------|-------------|-------------|
| "Rab32"    | 4.5220203   | 3.3343773   | 4.7068987   | 3.6504889   | 4.0216494   | 4.1572833   | 4.052978    | 4.068791    |
| "Rab33b"   | 7.7225757   | 8.096609    | 8.157732    | 7.9878635   | 8.103935    | 8.393754    | 8.003024    | 8.109331    |
| "Rab34"    | 5.02430585  | 4.762518    | 6.7119265   | 5.25857015  | 7.3760993   | 6.7993053   | 7.08360085  | 5.947356    |
| "Rab38"    | 2.8748572   | 2.9355435   | 3.5065062   | 2.9631612   | 2.8111537   | 2.887568    | 3.2188895   | 2.97741     |
| "Rab3a"    | 3.7790775   | 3.4957788   | 3.8552308   | 3.8967617   | 3.8525517   | 3.7475863   | 3.9538577   | 3.967971    |
| "Rab3b"    | 2.2696056   | 2.3597553   | 2.5774097   | 2.4030972   | 2.3217146   | 2.268302    | 2.30238     | 2.3916724   |
| "Rab3c"    | 2.5853286   | 2.670255    | 2.6161585   | 2.7555962   | 2.6216507   | 2.5764515   | 2.6122618   | 2.7198007   |
| "Rab3d"    | 3.151648433 | 3.165045367 | 3.593386667 | 3.167342633 | 3.7294104   | 3.877335733 | 3.963694133 | 3.109284367 |
| "Rab3gap2" | 5.2416124   | 5.8416653   | 5.650813    | 5.818331    | 5.038024    | 5.630747    | 6.017298    | 6.008222    |
| "Rab3il1"  | 2.406332175 | 2.5800802   | 2.9343931   | 2.637648    | 2.5495008   | 2.5224652   | 2.55196335  | 2.7305289   |
| "Rab3ip"   | 8.151727    | 7.060143    | 7.289874    | 7.489481    | 7.5082755   | 7.1083713   | 8.769085    | 7.768426    |
| "Rab40b"   | 4.744359    | 4.8571988   | 5.3812785   | 5.6808007   | 4.5071987   | 4.5283786   | 6.4314335   | 5.4868134   |
| "Rab40c"   | 4.3333461   | 5.23554185  | 4.19853535  | 4.1186597   | 4.2124952   | 4.3211948   | 4.2489325   | 4.18418815  |
| "Rab43"    | 6.0743637   | 5.268982    | 5.3160686   | 5.2277174   | 5.4844446   | 5.5547347   | 5.4261236   | 5.56947     |
| "Rab4a"    | 4.61660105  | 4.41297445  | 4.27735135  | 4.73842085  | 4.2868337   | 4.13423615  | 4.1065282   | 4.6481105   |
| "Rab5a"    | 10.022721   | 10.460248   | 10.012959   | 10.210397   | 10.168457   | 10.386066   | 9.925278    | 10.202564   |
| "Rab5b"    | 2.5673122   | 2.6792116   | 2.6293225   | 3.4192486   | 2.633881    | 2.5730624   | 2.6249595   | 2.7495646   |
| "Rab5c"    | 7.506094    | 7.236808    | 7.6318865   | 7.712212    | 7.15189     | 7.6611867   | 7.9882407   | 7.4876485   |
| "Rab6a"    | 9.73987225  | 9.8215335   | 9.970105    | 10.260864   | 9.7955285   | 9.674597    | 9.927977    | 10.183484   |
| "Rab6b"    | 5.3907967   | 5.3319693   | 6.7146964   | 6.638768    | 6.1694474   | 6.0365324   | 6.895185    | 7.1596317   |
| "Rab7"     | 10.49525    | 10.986624   | 9.9836685   | 10.3673375  | 10.697037   | 10.5382055  | 10.0646515  | 10.2147005  |
| "Rab7l1"   | 4.073362    | 2.682996    | 5.2314324   | 4.8886876   | 4.703443    | 5.1521525   | 5.3874702   | 4.931578    |
| "Rab8a"    | 5.20249     | 4.329661    | 4.836079    | 4.895175    | 5.085497    | 5.4070635   | 4.874654    | 4.370214    |
| "Rab8b"    | 7.655388    | 7.525371    | 8.065282    | 7.4229093   | 8.324191    | 8.564066    | 7.9791083   | 7.7077804   |
| "Rab9"     | 9.292847    | 9.60735     | 8.752966    | 8.910054    | 9.750334    | 9.867386    | 8.695208    | 8.955088    |
| "Rabac1"   | 11.131153   | 11.482464   | 10.9391575  | 10.947103   | 10.9907465  | 10.809849   | 11.396191   | 10.784262   |
| "Rabep1"   | 5.63570165  | 5.789675175 | 5.737281425 | 5.77793655  | 5.635144725 | 5.752319    | 5.716365575 | 5.86097995  |
| "Rabep2"   | 3.2671778   | 3.385303    | 3.3044      | 3.3930733   | 3.3083408   | 3.3996828   | 3.3099756   | 3.3882036   |
| "Rabepk"   | 3.58547995  | 3.90562705  | 3.9216462   | 4.25426195  | 3.89443945  | 3.61792445  | 4.24633125  | 4.520242    |
| "Rabgap1"  | 5.1551571   | 5.55362305  | 5.3546857   | 5.4257326   | 5.38905085  | 5.38586685  | 5.3619025   | 5.52696425  |
| "Rabgap1l" | 5.392296    | 5.3948426   | 5.531187    | 5.4278183   | 5.827486    | 6.375194    | 4.947306    | 5.462435    |
| "Rabgef1"  | 9.312845    | 9.545344333 | 9.455483667 | 9.877157333 | 9.607466    | 9.510794    | 9.320510167 | 9.764458    |
| "Rabgga"   | 4.8605957   | 4.630741    | 4.6351013   | 4.847461    | 4.608884    | 4.573577    | 4.8349695   | 4.876827    |
| "Rabggta"  | 9.613379    | 10.565832   | 9.344048    | 9.372517    | 9.862976    | 10.583042   | 9.587925    | 9.407232    |
| "Rabif"    | 6.663387    | 5.618623    | 6.598379    | 6.661892    | 5.956344    | 5.969325    | 7.058382    | 6.7497826   |
| "RabI3"    | 4.3503385   | 4.52780685  | 4.3179683   | 4.4064849   | 4.38116945  | 3.97642375  | 4.1783166   | 4.3183722   |
| "RabI5"    | 3.835148    | 3.8274133   | 4.0334034   | 3.8906507   | 3.798072    | 3.6046965   | 3.8318174   | 3.8569834   |
| "RabI6"    | 6.637790867 | 6.721693167 | 6.769637167 | 7.0920814   | 6.4169045   | 6.407574333 | 6.897946433 | 6.993865267 |
| "Rac1"     | 7.480823933 | 7.671413233 | 7.437226967 | 7.407000767 | 7.495699467 | 7.815370667 | 7.530834433 | 7.370352667 |
| "Rac2"     | 2.9095364   | 2.0460386   | 2.0663164   | 2.097208    | 2.0135522   | 5.543283    | 2.065969    | 2.0968592   |
| "Rac3"     | 2.9194047   | 3.2579997   | 3.031133    | 3.1245718   | 3.0402584   | 2.8618217   | 3.0343494   | 3.1767466   |
| "Racgap1"  | 2.7819242   | 3.001757    | 3.0985234   | 3.017225    | 2.8942428   | 2.9270842   | 2.9291308   | 3.023401    |
| "Rad1"     | 5.04391     | 5.5543475   | 5.3944235   | 5.43728     | 5.5754437   | 5.3675313   | 5.8128567   | 5.9177976   |
| "Rad17"    | 7.2490916   | 7.649597    | 7.3815784   | 7.618709    | 7.459272    | 7.5560455   | 7.4130507   | 7.6312327   |
| "Rad21"    | 7.328837733 | 7.740594    | 7.608389    | 7.730825833 | 7.654483333 | 7.487824667 | 7.656053333 | 8.040288333 |
| "Rad23a"   | 8.764653    | 8.858286    | 8.6780475   | 8.714674    | 7.9919058   | 7.8840923   | 8.984699    | 8.4217215   |
| "Rad23b"   | 8.8567275   | 9.2077585   | 8.8110905   | 8.919863    | 8.8747815   | 9.597361    | 8.9940445   | 8.752845    |
| "Rad50"    | 4.60495     | 3.7993443   | 4.623951    | 4.851903    | 4.932666    | 5.0142546   | 5.134037    | 5.4469194   |
| "Rad51"    | 2.491071    | 2.740924    | 3.3157525   | 2.5313387   | 2.4652374   | 2.4397888   | 2.4753401   | 2.5197647   |
| "Rad51ap1" | 2.7469055   | 3.0101531   | 2.902178533 | 3.022259233 | 2.877617533 | 2.844759067 | 2.872697267 | 3.074973133 |
| "Rad51c"   | 2.4621181   | 2.5874772   | 2.542061    | 2.6166492   | 2.5403411   | 2.5262184   | 2.5247207   | 2.6594992   |
| "Rad51l3"  | 3.04004395  | 3.09470685  | 3.1376697   | 3.1380894   | 3.05685425  | 3.1108154   | 3.0902479   | 3.16569115  |
| "Rad52"    | 4.0012803   | 4.3506087   | 3.7343261   | 4.11444635  | 4.3800765   | 4.55440845  | 4.19384885  | 4.3948709   |
| "Rad54l"   | 2.6805153   | 2.8816274   | 2.767802    | 2.9195546   | 2.7744696   | 2.76508855  | 2.76088095  | 2.8840551   |
| "Rad9"     | 3.4438794   | 3.4700577   | 3.4596703   | 3.4938605   | 3.7731397   | 3.4365935   | 3.6216543   | 3.5098612   |
| "Rae1"     | 6.85576     | 7.222647    | 6.2094555   | 6.392443    | 6.985215    | 7.1771636   | 6.5904846   | 6.474207    |
| "Rae1a"    | 2.4503884   | 2.5532722   | 2.8763874   | 2.5838444   | 2.5055437   | 2.4527442   | 2.50204     | 2.5710416   |
| "Raf1"     | 7.514146    | 8.1506004   | 7.834530933 | 7.825113533 | 7.726637333 | 7.690782333 | 7.425371667 | 7.7870705   |
| "Rag1"     | 2.4670439   | 2.5940223   | 2.4935715   | 2.5906448   | 2.4914584   | 2.423069    | 2.462572    | 2.5767698   |
| "Rag2"     | 3.1631844   | 3.3300836   | 3.2123656   | 3.381931    | 3.2209847   | 3.146268    | 3.20786     | 3.3009214   |
| "Rai1"     | 4.4154963   | 4.27715     | 4.4760184   | 4.4974713   | 4.377236    | 4.525715    | 4.4622316   | 4.451662    |
| "Rai12"    | 8.031498    | 7.799548    | 8.28241     | 8.601976    | 8.105961    | 7.6936946   | 8.484227    | 8.40514     |
| "Rai14"    | 6.4713736   | 6.1175647   | 5.8889823   | 5.3264785   | 5.5705857   | 6.371835    | 5.6439495   | 5.658718    |
| "Rai2"     | 5.636807    | 7.219822    | 6.960327    | 7.773403    | 6.7969217   | 6.5776043   | 6.904402    | 7.3609242   |
| "Rala"     | 7.0240565   | 7.04301485  | 7.9367665   | 8.2551998   | 6.9383765   | 6.5938945   | 8.19808125  | 6.9263682   |
| "Ralb"     | 4.97272765  | 4.75363965  | 5.1793647   | 5.4871771   | 5.20266665  | 5.1367355   | 5.276933    | 5.5189774   |
| "Ralbp1"   | 8.0364915   | 8.8534165   | 8.0137875   | 8.01260085  | 8.3729165   | 8.6410257   | 8.10876735  | 8.103698    |
| "Ralgapa1" | 2.3780897   | 2.3747222   | 2.3680766   | 2.4914646   | 2.3654718   | 2.3721352   | 2.3946285   | 2.464406    |
| "Ralgds"   | 4.5585814   | 4.5644355   | 5.159382    | 5.191206    | 5.364705    | 5.1457763   | 5.986723    | 5.192512    |
| "Ralgps2"  | 2.9644274   | 2.8098743   | 2.77305885  | 2.867628    | 2.8421681   | 4.2009548   | 2.7767485   | 2.84765285  |
| "Raly"     | 7.5466113   | 7.360121    | 7.333903    | 7.5259337   | 7.1319494   | 7.452668    | 7.267332    | 7.360727    |
| "Ramp1"    | 8.648143    | 8.53789     | 9.53331     | 9.940782    | 9.485391    | 9.27337     | 8.629973    | 9.922576    |
| "Ramp2"    | 7.887903233 | 8.005760233 | 7.817901667 | 7.9807219   | 8.0651504   | 8.1585902   | 7.6420388   | 7.910092433 |
| "Ranbp1"   | 8.252459    | 8.181112    | 8.484982    | 8.038253    | 7.9381447   | 8.293373    | 8.430353    | 7.9848757   |
| "Ranbp10"  | 8.88937125  | 9.7744485   | 8.10618475  | 8.2095835   | 8.7886585   | 9.435683    | 7.86880225  | 8.0534125   |
| "Ranbp2"   | 9.2605955   | 10.0362825  | 8.837994    | 9.208687    | 9.506065    | 10.085021   | 8.87203425  | 9.1886965   |
| "Ranbp3"   | 7.2079477   | 7.873934    | 7.306004    | 7.275338    | 7.2456903   | 7.4263434   | 7.168454    | 7.2387633   |
| "Ranbp9"   | 10.388888   | 10.772662   | 8.2644688   | 8.4505685   | 9.752988    | 10.8946775  | 8.519899    | 8.5858275   |
| "Rangap1"  | 6.01405925  | 5.966169    | 5.98900555  | 5.8991885   | 5.82340215  | 6.110945    | 5.9511062   | 5.441338    |
| "Rangrf"   | 8.828249    | 9.134437    | 9.594565    | 9.945516    | 9.220489    | 8.691877    | 9.364018    | 9.7219095   |
| "Rap1a"    | 9.60958775  | 9.7982775   | 9.812705    | 10.0271385  | 9.63286025  | 9.763271    | 9.9243345   | 9.9781355   |

|            |             |             |             |             |             |             |             |             |
|------------|-------------|-------------|-------------|-------------|-------------|-------------|-------------|-------------|
|            |             |             |             |             |             |             |             |             |
| "Rap1b"    | 8.8281171   | 8.641071    | 8.692597833 | 8.480980767 | 8.664799    | 9.056680533 | 8.827156667 | 8.565051333 |
| "Rap1gds1" | 7.3116527   | 8.247763    | 7.967626    | 8.380732    | 7.757045    | 7.8686566   | 7.735823    | 8.264297    |
| "Rap2a"    | 3.906249    | 2.8341184   | 3.9647276   | 4.1426954   | 4.019198    | 4.0738053   | 4.5505557   | 4.09206     |
| "Rap2b"    | 2.967303867 | 2.6499788   | 3.7311586   | 3.279259867 | 3.475426767 | 3.517548433 | 4.048820567 | 3.2984058   |
| "Rap2c"    | 7.311760667 | 7.607245067 | 7.750817167 | 8.004163833 | 7.543469767 | 7.199525    | 7.8157939   | 7.8998535   |
| "Rapgef1"  | 9.461791    | 9.705618    | 8.894924    | 9.25992     | 9.103172    | 8.96805     | 9.67072     | 9.137972    |
| "Rapgef3"  | 3.410427125 | 4.098897625 | 3.865550575 | 3.977333875 | 4.2219112   | 4.5057035   | 3.896335125 | 4.101837575 |
| "Rapgef4"  | 7.209152    | 3.0994266   | 3.0504159   | 3.2050605   | 2.944517    | 3.01012535  | 3.04589     | 3.5452151   |
| "Rapgef6"  | 2.3743477   | 2.389157    | 2.3833177   | 2.4194252   | 2.3779185   | 2.7763872   | 2.345387    | 2.3824885   |
| "Rapsn"    | 5.7461276   | 5.5007095   | 5.8571877   | 5.945762    | 5.312217    | 3.3625166   | 7.0554557   | 5.9680395   |
| "Rara"     | 2.3890686   | 2.455476    | 2.417065    | 2.5207486   | 2.4185388   | 2.3844578   | 2.4163947   | 2.4914098   |
| "Rarb"     | 3.3284607   | 2.7299683   | 4.27126     | 6.2498226   | 3.706945    | 2.6134298   | 4.854635    | 5.287526    |
| "Rarg"     | 2.3205993   | 2.3616362   | 2.395692    | 2.3892627   | 2.3608074   | 2.3483295   | 2.4568577   | 2.326317    |
| "Rarres2"  | 7.337797733 | 5.758737167 | 6.919623133 | 6.298694267 | 7.2855426   | 6.9712104   | 6.859936267 | 6.375627333 |
| "Rars"     | 8.709738    | 9.265096    | 8.961539    | 9.144446    | 9.035858    | 8.982518    | 8.888028    | 8.959774    |
| "Rars2"    | 5.536627    | 6.357102    | 6.489763    | 6.5861597   | 6.324063    | 6.0654035   | 6.121448    | 5.9785743   |
| "Rasa1"    | 6.33511     | 6.568853767 | 6.657843667 | 6.830697433 | 6.5201201   | 6.560232933 | 6.709774233 | 6.8242301   |
| "Rasa2"    | 5.809237    | 5.95891     | 5.979095    | 5.1833906   | 6.6602573   | 6.796622    | 5.4000874   | 6.02921     |
| "Rasa3"    | 7.257225    | 8.058377    | 6.7229347   | 6.443036    | 8.150499    | 8.917161    | 7.75037     | 6.7697673   |
| "Rasa4"    | 4.1551757   | 4.313298    | 5.1750183   | 4.320755    | 3.9577441   | 4.227337    | 4.996676    | 4.6966844   |
| "Rasal2"   | 5.2869616   | 4.7734323   | 4.4301357   | 4.580376    | 5.098226    | 5.3052998   | 4.77708     | 4.7580886   |
| "Rasd1"    | 4.346363    | 4.3882833   | 4.369333    | 3.5977125   | 5.809287    | 5.3038034   | 4.442936    | 4.362664    |
| "Rasd2"    | 4.4839847   | 4.9469225   | 5.080585    | 5.39123965  | 5.0333863   | 3.9376375   | 6.233952    | 5.5835135   |
| "Rasgrf1"  | 2.45102945  | 2.54719175  | 2.49032965  | 2.6197097   | 2.4956367   | 2.46118725  | 2.48343155  | 2.59124205  |
| "Rasgrp1"  | 2.3545673   | 2.448362933 | 2.3995998   | 2.494070767 | 2.405443967 | 2.3592193   | 2.3997903   | 2.485652667 |
| "Rasgrp2"  | 3.7065064   | 3.5525763   | 3.613145267 | 3.655546267 | 3.6034301   | 4.364351067 | 3.600912567 | 3.848539433 |
| "Rasi1p1"  | 2.30211     | 2.3687813   | 2.3291385   | 2.4184844   | 2.3613703   | 2.6471398   | 2.7795656   | 2.422679    |
| "Ras11b"   | 5.362959    | 6.8566065   | 7.679457    | 6.94972     | 7.566897    | 7.2898154   | 7.2433085   | 7.2228627   |
| "Ras12"    | 4.366637    | 4.6299133   | 5.112584    | 5.206117    | 5.6324663   | 4.815619    | 4.9835453   | 5.0119247   |
| "Ras12-9"  | 5.3620152   | 5.4114037   | 5.4285784   | 5.959841    | 5.773324    | 4.933487    | 5.918236    | 5.9043727   |
| "Rassf1"   | 6.4892774   | 7.064801    | 6.2554336   | 6.266064    | 6.641455    | 6.911847    | 5.9665647   | 5.958055    |
| "Rassf2"   | 3.0063684   | 3.242813    | 4.0877705   | 3.6953151   | 4.7456846   | 5.855808    | 4.3356357   | 3.2530732   |
| "Rassf3"   | 6.5910633   | 6.34464575  | 6.6566192   | 6.9812685   | 6.7613728   | 6.5339433   | 7.158779    | 7.15492435  |
| "Rassf5"   | 5.39144925  | 3.42585205  | 3.8260683   | 3.0568789   | 3.53063135  | 6.71789335  | 3.4528866   | 3.3397329   |
| "Rassf8"   | 7.5795155   | 6.7971425   | 7.9086814   | 8.044705    | 7.6319056   | 6.33336     | 7.8516197   | 8.002192    |
| "Rassf9"   | 3.498428    | 3.6656373   | 3.6325083   | 3.8779378   | 3.6555073   | 3.525622    | 3.5269122   | 3.7389004   |
| "Rb1"      | 8.672737    | 8.794848    | 8.348977    | 8.177304    | 8.67009     | 8.49235     | 9.174375    | 8.324917    |
| "Rb1cc1"   | 9.6379915   | 10.379771   | 9.1949885   | 9.6951285   | 9.67391275  | 10.1376845  | 9.059041    | 9.681684    |
| "Rbbp4"    | 7.622285133 | 7.572884    | 7.710631    | 7.674581    | 7.720272    | 7.9342445   | 7.685288667 | 7.7894071   |
| "Rbbp6"    | 6.369552    | 7.472350567 | 6.3412781   | 6.7274896   | 6.810623667 | 7.0822455   | 6.557096967 | 6.723373833 |
| "Rbbp7"    | 10.826941   | 10.9795955  | 11.2134545  | 11.1346551  | 11.15513    | 11.0095355  | 10.9120995  | 11.35849    |
| "Rbbp8"    | 5.2850616   | 3.29429245  | 3.47786295  | 3.13360915  | 3.6447964   | 3.7576413   | 3.42005745  | 3.3518485   |
| "Rbbp9"    | 5.031319    | 5.0363727   | 5.453156    | 5.684383    | 5.4669      | 5.391547    | 5.4516597   | 6.204439    |
| "Rbck1"    | 6.542097    | 6.5828533   | 6.6857843   | 6.805663    | 6.6636143   | 6.8846884   | 7.130716    | 6.7453675   |
| "Rbfox1"   | 11.489295   | 12.12465    | 11.956526   | 11.9906025  | 11.949026   | 11.865663   | 11.706338   | 12.005124   |
| "Rbfox2"   | 3.2778258   | 3.599808575 | 3.89537315  | 3.829466225 | 3.534776325 | 3.3056527   | 3.886045375 | 3.795489025 |
| "Rbfox3"   | 2.546973    | 2.6782327   | 2.5771258   | 2.7032363   | 2.5857656   | 2.5455005   | 2.5743854   | 2.6762116   |
| "Rbks"     | 3.42146245  | 3.4477438   | 3.0889883   | 3.2742808   | 3.1967433   | 3.52917865  | 3.24193715  | 3.2403425   |
| "Rbl1"     | 2.53490395  | 2.6507428   | 2.99292245  | 2.74980915  | 2.807724    | 3.3720719   | 3.2776656   | 2.8422382   |
| "Rbl2"     | 7.416202    | 8.7292975   | 6.3527935   | 6.2992607   | 7.9561088   | 7.9722155   | 6.1438157   | 6.689503    |
| "Rbm12"    | 4.2362696   | 4.998768    | 4.562134    | 4.3753117   | 4.35062325  | 4.4410126   | 4.45088675  | 4.1519088   |
| "Rbm14"    | 4.8650554   | 6.11482605  | 4.871582283 | 4.637347033 | 5.169712767 | 6.074884883 | 4.886686117 | 4.805069717 |
| "Rbm15"    | 7.4811378   | 8.121472    | 7.529611    | 7.5429945   | 7.78553     | 7.9722514   | 7.7873764   | 7.642687    |
| "Rbm15b"   | 3.0914426   | 3.851875    | 2.9339025   | 3.001863    | 2.9768481   | 3.088059    | 2.9063275   | 3.175032    |
| "Rbm17"    | 9.041748    | 9.33507     | 8.812085    | 9.029691    | 9.072074    | 9.305776    | 8.877628    | 9.033367    |
| "Rbm18"    | 7.1143395   | 7.52298015  | 6.723872    | 7.104167    | 7.14911575  | 7.1316043   | 6.6344635   | 7.238083    |
| "Rbm19"    | 4.2758303   | 4.65689     | 4.269649    | 4.372634    | 4.279202    | 4.2550654   | 4.2864738   | 4.3623705   |
| "Rbm22"    | 8.20325     | 8.641871    | 8.02985     | 8.198042    | 8.307229    | 8.5868435   | 8.017912    | 8.288558    |
| "Rbm25"    | 6.65184246  | 7.01045208  | 6.26795944  | 6.42064696  | 6.76655246  | 6.87498968  | 6.24838522  | 6.54024278  |
| "Rbm26"    | 6.846762    | 7.2212205   | 7.083611    | 7.680757    | 7.0734744   | 6.973373    | 7.129378    | 7.8455653   |
| "Rbm28"    | 6.95291875  | 7.327485    | 6.7601582   | 6.70336625  | 6.76045935  | 7.0075485   | 7.0042351   | 7.1887965   |
| "Rbm38"    | 7.428731    | 7.750132    | 7.8053265   | 8.337948    | 7.7764564   | 7.2326283   | 7.791656    | 7.972338    |
| "Rbm39"    | 8.674363571 | 8.598910957 | 7.231692214 | 7.2615379   | 7.702488129 | 8.070910071 | 7.184285657 | 7.424963443 |
| "Rbm43"    | 3.6793528   | 3.8968325   | 4.2765617   | 3.8659074   | 4.3269186   | 5.2561545   | 4.595905    | 4.312727    |
| "Rbm47"    | 2.79578415  | 2.83158265  | 2.8021884   | 2.908044    | 2.810457    | 2.7843627   | 2.8102765   | 2.86857315  |
| "Rbm4b"    | 2.4010978   | 2.5051825   | 2.4137425   | 2.4525166   | 2.4125235   | 2.398673    | 2.4128108   | 2.4549923   |
| "Rbm5"     | 6.923340625 | 7.6270595   | 7.41270335  | 7.0336359   | 7.802874775 | 7.953968925 | 7.4338309   | 7.4637676   |
| "Rbm6"     | 6.441662    | 6.7427455   | 5.8778795   | 5.81862535  | 6.22404535  | 6.8073033   | 5.85775135  | 6.1669023   |
| "Rbm7"     | 9.842281    | 9.794881    | 9.268245    | 9.345409    | 9.827905    | 10.410857   | 9.406431    | 9.486136    |
| "Rbm8a"    | 6.4255732   | 6.9728053   | 6.6629178   | 6.7498387   | 6.738741    | 6.77928865  | 6.675131    | 6.6258645   |
| "Rbms1"    | 8.963278    | 8.23659925  | 9.0563135   | 8.794155    | 8.8602775   | 8.972226    | 8.8510965   | 8.822991    |
| "Rbms2"    | 6.0681906   | 6.3158517   | 6.580566    | 6.61609     | 7.5052443   | 7.2745395   | 6.994555    | 6.317653    |
| "Rbmxx"    | 3.66142805  | 4.44585465  | 4.288055475 | 4.190420075 | 4.4532132   | 4.1695566   | 4.250951    | 4.169379225 |
| "Rbmxx2"   | 2.7668865   | 3.4243073   | 3.0756857   | 2.956518    | 2.872125    | 2.8283987   | 3.7171743   | 2.9412398   |
| "Rbmxx1"   | 8.340105    | 9.146488    | 8.904008    | 8.574005    | 8.7763405   | 9.352419    | 8.645874    | 8.577982    |
| "Rbp1"     | 7.409343    | 6.3432407   | 7.456922    | 6.7633305   | 6.9925303   | 6.85228     | 6.916322    | 7.2304907   |
| "Rbp4"     | 12.453708   | 3.6664011   | 7.1287446   | 2.8398964   | 7.655055    | 5.799774    | 7.2831583   | 6.003764    |
| "Rbp7"     | 6.0023103   | 5.689609    | 5.373338    | 4.912155    | 7.5204244   | 9.614858    | 7.169958    | 6.2015305   |
| "Rbpj"     | 4.9124118   | 5.3795242   | 5.8075361   | 5.20649565  | 5.322552    | 5.5812305   | 5.354169    | 5.3262352   |
| "Rbpms"    | 4.90153395  | 4.6334486   | 4.119550825 | 4.304483    | 4.754679225 | 4.99219185  | 4.298536475 | 4.306672875 |
| "Rc3h2"    | 5.4393248   | 5.6820164   | 5.8851868   | 6.1607682   | 5.69224975  | 5.57612835  | 5.748064    | 6.0760226   |

|          |             |             |             |             |             |             |             |             |
|----------|-------------|-------------|-------------|-------------|-------------|-------------|-------------|-------------|
| "Rcan1"  | 9.103622    | 6.66820265  | 6.0765813   | 7.1497783   | 6.058716    | 6.7488663   | 6.09346415  | 6.1037842   |
| "Rcan2"  | 8.344942    | 7.466804    | 7.86313     | 9.017023    | 8.728453    | 8.354469    | 8.0630865   | 9.160418    |
| "Rcan3"  | 2.7353988   | 3.016908    | 3.1081383   | 3.0647254   | 2.9906561   | 2.9652689   | 3.0443425   | 3.4312117   |
| "Rcbb1"  | 7.0317445   | 7.160925    | 7.2827654   | 7.0428176   | 7.1963325   | 6.918083    | 7.0052567   | 7.1235766   |
| "Rcbb2"  | 4.96811065  | 4.83707065  | 6.1409043   | 5.9920325   | 5.8822728   | 5.24501775  | 6.1811598   | 5.83529935  |
| "Rcc1"   | 3.3702106   | 3.5750418   | 3.5666745   | 3.6487134   | 3.5649052   | 3.5872092   | 3.5647466   | 3.6208117   |
| "Rcc2"   | 5.5048213   | 5.0697703   | 5.7644353   | 5.7297883   | 5.682872    | 6.025313    | 5.807872    | 5.695848    |
| "Rccd1"  | 5.200648    | 5.241153    | 5.2344437   | 5.3140564   | 5.0539556   | 5.0042915   | 5.2322254   | 5.34523     |
| "Rce1"   | 4.205248    | 4.766652    | 4.342519    | 3.8338854   | 4.2328367   | 4.5206957   | 4.1129246   | 3.6967072   |
| "Rchy1"  | 9.538241    | 9.517233    | 9.599909    | 9.515868    | 9.496632    | 9.184803    | 9.483783    | 9.497802    |
| "Rcl1"   | 11.281338   | 7.3070064   | 6.9346385   | 7.1721616   | 7.9618177   | 7.4048753   | 6.821416    | 7.180623    |
| "Rcn1"   | 6.7041597   | 6.3613367   | 8.328973    | 7.1069136   | 6.5690417   | 6.598073    | 7.4940643   | 7.3303614   |
| "Rcn2"   | 8.901154    | 8.8358345   | 9.635062    | 9.556055    | 9.115761    | 8.882952    | 9.560864    | 9.762873    |
| "Rcn3"   | 5.2994466   | 3.9106004   | 7.7552342   | 6.4357457   | 5.7835927   | 5.4247293   | 6.0337276   | 6.2514668   |
| "Rcor1"  | 3.920053067 | 3.878539033 | 4.104068333 | 4.151905067 | 4.071798033 | 3.992692667 | 4.118928433 | 4.2164986   |
| "Rcor3"  | 3.6585958   | 4.0176525   | 4.139011    | 4.774585    | 4.0859227   | 3.6808934   | 4.61833     | 4.441282    |
| "Rcsd1"  | 8.173971    | 9.476324    | 9.050882    | 9.185505    | 8.83391     | 8.537053    | 8.774872    | 8.858559    |
| "Rd3"    | 2.44504155  | 2.5916747   | 2.52800555  | 2.6689981   | 2.5348888   | 2.4795177   | 2.526739    | 2.630692    |
| "Rdbp"   | 4.988671    | 3.978598    | 4.715811    | 4.7514725   | 4.595788    | 4.7121325   | 5.418273    | 4.6456714   |
| "Rdh1"   | 2.313533    | 2.4070847   | 2.3566644   | 2.4591212   | 2.353418    | 2.3332322   | 2.3514204   | 2.462233    |
| "Rdh10"  | 5.678013    | 5.0868526   | 5.073538    | 4.882021    | 5.3067546   | 5.649171    | 5.393518    | 4.8799133   |
| "Rdh11"  | 4.68896405  | 2.9631448   | 3.27593265  | 3.3886454   | 3.1703927   | 3.09631875  | 3.4025206   | 3.6260259   |
| "Rdh12"  | 2.3270438   | 2.401289    | 2.3685784   | 2.459456    | 2.365882    | 2.3486307   | 2.3549001   | 2.4484499   |
| "Rdh13"  | 5.505403    | 5.057687    | 5.4874387   | 5.669402    | 5.309691    | 4.480962    | 5.1511765   | 5.871681    |
| "Rdh14"  | 6.70300785  | 6.948083    | 7.09532215  | 7.111802    | 7.07940365  | 6.6422797   | 7.1053885   | 7.0385627   |
| "Rdh16"  | 2.6672554   | 2.341895    | 2.3141255   | 2.394452    | 2.3131726   | 2.2837915   | 2.3118048   | 2.3893661   |
| "Rdh5"   | 2.936314    | 2.906195    | 2.9162936   | 2.9543362   | 2.8070579   | 2.6507287   | 3.542102    | 2.9522414   |
| "Rdh7"   | 10.131063   | 2.240708    | 3.138788    | 2.294215    | 2.234761    | 2.1962464   | 2.2117126   | 2.3540788   |
| "Rdh9"   | 6.6854053   | 3.3273995   | 3.202709    | 3.3576999   | 3.2261271   | 3.1255906   | 3.1651883   | 3.2005668   |
| "Rdm1"   | 7.281589    | 8.040848    | 7.980665    | 7.835551    | 7.76481     | 7.593549    | 7.809166    | 7.8319187   |
| "Rdx"    | 10.441665   | 11.037852   | 11.124483   | 11.126331   | 10.80452483 | 10.70587333 | 10.76875767 | 11.335997   |
| "Reck"   | 5.104908    | 4.5445786   | 6.946986    | 6.4438033   | 6.675825    | 5.455549    | 6.20316     | 6.4304843   |
| "Recql"  | 3.362374367 | 3.6627269   | 3.467144433 | 3.569720567 | 3.498814167 | 3.608030333 | 3.514424433 | 3.753018733 |
| "Recql4" | 2.2744741   | 2.4140444   | 2.3135526   | 2.3735824   | 2.3117611   | 2.291158    | 2.3107657   | 2.346377    |
| "Recql5" | 2.9892352   | 3.0983872   | 3.0838542   | 3.1162896   | 3.086589    | 3.1252415   | 2.783712    | 3.1164272   |
| "Reep1"  | 5.7702258   | 6.1796982   | 6.638356    | 6.8373387   | 5.9106188   | 5.5755808   | 6.33730225  | 6.5191007   |
| "Reep2"  | 2.4384186   | 2.4893472   | 2.5275924   | 2.4999394   | 2.4516547   | 2.4010935   | 2.4557092   | 2.4994984   |
| "Reep3"  | 7.848372975 | 7.458760625 | 7.1953562   | 6.961300225 | 7.45339435  | 8.182302875 | 7.159661825 | 7.28419385  |
| "Reep5"  | 8.727679833 | 8.699966433 | 9.146498    | 8.765183667 | 9.140227167 | 8.689273167 | 9.762645667 | 8.735158    |
| "Reep6"  | 7.0805717   | 2.655613    | 2.6080217   | 2.6647825   | 2.6277714   | 2.570835    | 3.4377265   | 2.642641    |
| "Reg1"   | 3.4267092   | 2.3264651   | 2.283215    | 2.3834078   | 2.2842293   | 2.249436    | 2.2796984   | 2.374086    |
| "Reg3a"  | 2.355757    | 2.4695542   | 2.401643    | 2.5015883   | 2.401284    | 2.3793027   | 2.3782597   | 2.4694798   |
| "Reg3b"  | 2.3275075   | 2.406588    | 2.3375764   | 2.4681942   | 2.3500068   | 2.320651    | 2.3362892   | 2.4354498   |
| "Reg4"   | 2.4494693   | 2.725525    | 2.6571693   | 2.7960637   | 2.6650245   | 2.629497    | 2.6529      | 2.7688725   |
| "Rel"    | 3.3901715   | 2.644399    | 2.5891562   | 2.6512253   | 2.601065    | 2.541993    | 2.5895145   | 2.6708965   |
| "Rela"   | 8.430464    | 7.9211926   | 7.531131    | 7.4185233   | 7.9818635   | 8.242749    | 7.614354    | 7.3320756   |
| "Relb"   | 5.291423    | 2.4229465   | 3.5020008   | 3.2865777   | 3.0908277   | 3.4979863   | 4.643733    | 3.1168747   |
| "Rel11"  | 7.79916465  | 7.34132885  | 8.08674325  | 7.7067412   | 8.14912     | 7.6734318   | 8.0931635   | 7.58199185  |
| "Reln"   | 7.791418    | 6.550003    | 7.414507    | 6.3028092   | 7.2476277   | 7.1449986   | 6.885829    | 7.0945373   |
| "Rem1"   | 2.2558715   | 2.3158374   | 2.3265114   | 2.354721    | 2.327898    | 2.3140693   | 2.3384295   | 2.4159007   |
| "Renbp"  | 2.9658616   | 2.944661    | 2.9421742   | 2.9796057   | 3.1983142   | 2.9973605   | 3.2002015   | 2.9655066   |
| "Rep15"  | 2.5979812   | 4.111704    | 2.701764    | 2.6812856   | 2.6246421   | 2.5542104   | 2.59518     | 2.7055357   |
| "Repin1" | 7.5777695   | 8.49467475  | 6.86713135  | 7.2426779   | 7.8153075   | 7.911241    | 6.917475    | 7.065135    |
| "Reps1"  | 8.285431    | 8.064457    | 7.885853    | 8.07439     | 7.72984     | 7.8627653   | 8.243177    | 7.783132    |
| "Rer1"   | 8.468892    | 8.75639425  | 9.0209245   | 9.13730725  | 8.686541    | 8.3607545   | 9.0783305   | 9.13048375  |
| "Rere"   | 9.613727    | 10.659803   | 9.362191    | 9.222877    | 10.442754   | 10.598101   | 9.462264    | 9.46836     |
| "Rerg"   | 3.559324    | 3.9210088   | 3.6423824   | 3.6632135   | 3.7329302   | 3.4929922   | 3.5604582   | 3.7412632   |
| "Rest"   | 3.961326067 | 4.306486733 | 4.08404467  | 4.1206034   | 4.206377667 | 4.100030867 | 4.054266633 | 4.108875733 |
| "Retn"   | 5.9559364   | 6.542357    | 8.501938    | 4.7476807   | 10.00183    | 10.033397   | 11.720504   | 7.480853    |
| "Retnla" | 8.923125    | 8.314442    | 11.740029   | 9.287313    | 11.437994   | 10.281379   | 10.834727   | 10.281798   |
| "Retsat" | 6.4158545   | 5.830804    | 6.52223065  | 7.00746315  | 7.7037594   | 6.08707485  | 6.7620465   | 7.08179595  |
| "Rev1"   | 7.594592    | 7.883068    | 8.167337    | 8.602061    | 7.99138     | 7.559618    | 8.058625    | 8.356407    |
| "Rev3l"  | 6.0745931   | 6.88506035  | 6.085551    | 6.1867863   | 6.2225451   | 6.2647085   | 5.9069649   | 6.200574    |
| "Rex2"   | 2.9453006   | 3.034582    | 2.9615448   | 3.0822914   | 2.9499974   | 2.8910644   | 2.9424477   | 3.0275376   |
| "Rexo1"  | 5.5278797   | 6.2811027   | 5.486572    | 5.3182273   | 5.487246    | 5.867649    | 5.431522    | 5.1496153   |
| "Rexo2"  | 9.550131    | 10.246553   | 9.772205    | 9.622261    | 9.503354    | 10.247979   | 9.819359    | 9.555532    |
| "Rexo4"  | 6.0657333   | 6.18722425  | 6.0659345   | 5.7618782   | 5.99529925  | 6.3321682   | 6.06594325  | 5.97175535  |
| "Rfc1"   | 6.667465    | 7.2396319   | 6.880069333 | 7.007685833 | 6.6132625   | 6.6449636   | 7.171509433 | 7.063319667 |
| "Rfc2"   | 6.5008883   | 6.4511003   | 6.3904996   | 6.427473    | 6.285452    | 6.279528    | 6.3860903   | 6.4434967   |
| "Rfc3"   | 3.2385694   | 3.5260905   | 3.4211907   | 3.6923932   | 3.1859697   | 3.0847167   | 3.68803715  | 3.6453685   |
| "Rfc4"   | 6.1228365   | 6.45806145  | 6.24668085  | 6.8237293   | 6.0239433   | 5.82018415  | 6.71591635  | 6.86761175  |
| "Rfc5"   | 3.3457735   | 3.565695    | 3.345235    | 3.336898    | 3.3593776   | 3.2812138   | 3.619285    | 3.3546746   |
| "Rffi"   | 4.4217689   | 4.664336    | 4.2710316   | 4.6102112   | 4.6143298   | 4.6458718   | 4.5039417   | 4.6090153   |
| "Rfk"    | 8.0816815   | 8.393482733 | 8.397157567 | 8.662999467 | 8.0427762   | 8.075378067 | 8.4400585   | 8.556832333 |
| "Rfng"   | 3.9088925   | 4.05748155  | 4.28991035  | 4.191678    | 3.92464195  | 4.11440265  | 4.1084921   | 4.18957255  |
| "Rftn2"  | 2.7444024   | 2.7983476   | 3.01829875  | 2.8253572   | 3.19663585  | 2.6687623   | 2.6867349   | 2.83885585  |
| "Rfwd2"  | 9.337923    | 9.578355    | 10.038925   | 9.984047    | 9.6101885   | 9.64108     | 9.698213    | 10.056224   |
| "Rfx2"   | 2.7849739   | 2.8297348   | 2.796257    | 2.8755648   | 2.810256    | 2.778228    | 2.8106241   | 2.8772311   |
| "Rfx5"   | 4.183878    | 4.0648575   | 4.662291    | 4.078719    | 4.1904426   | 4.3821073   | 5.664195    | 4.3510356   |
| "Rfxank" | 2.700615    | 2.7133956   | 2.6442475   | 2.7441435   | 2.6506734   | 2.6422257   | 2.661735    | 2.724417    |
| "Rfxap"  | 7.3621244   | 7.496046    | 6.929568    | 7.2776885   | 7.088125    | 7.400778    | 7.1270676   | 7.227608    |

|           |             |             |             |             |             |             |             |             |
|-----------|-------------|-------------|-------------|-------------|-------------|-------------|-------------|-------------|
| "Rg9mtd1" | 7.468919    | 7.98593     | 7.1313562   | 7.879148    | 7.7613983   | 7.8597474   | 7.366707    | 7.7585936   |
| "Rg9mtd2" | 2.99374755  | 3.0038228   | 2.9872016   | 3.03081415  | 3.2352639   | 3.6232196   | 3.021811    | 2.97505425  |
| "Rg9mtd3" | 4.86362     | 4.8876505   | 4.9056573   | 4.9399366   | 4.9367404   | 4.5397806   | 5.071771    | 5.295183    |
| "Rgl1"    | 3.4374878   | 3.5605958   | 4.0206227   | 3.5282307   | 4.539322    | 4.458465    | 3.9640708   | 4.0224347   |
| "Rgl2"    | 7.929219    | 7.9553666   | 8.174322    | 8.439762    | 8.32948     | 8.279297    | 8.338333    | 8.245056    |
| "Rgn"     | 9.450135    | 2.1640666   | 3.36595     | 2.216516    | 2.532168    | 2.0828416   | 2.1102602   | 2.2124815   |
| "Rgnef"   | 3.0882473   | 3.1940758   | 3.1599305   | 3.2173414   | 3.2028837   | 3.0837786   | 3.1750698   | 3.2193289   |
| "Rgs1"    | 5.804234    | 2.8427095   | 2.8081813   | 2.9092286   | 2.8104312   | 3.054282    | 2.8095527   | 2.888135    |
| "Rgs10"   | 4.832187    | 3.6272757   | 6.0632014   | 5.0047827   | 5.641651    | 6.312833    | 5.8435206   | 5.2202435   |
| "Rgs14"   | 4.076225    | 4.230435    | 4.674155    | 4.503391    | 4.6484685   | 4.6603436   | 4.45899     | 4.4872365   |
| "Rgs16"   | 5.44082725  | 3.5355606   | 3.3719779   | 3.2309132   | 3.60525345  | 3.67245565  | 3.2829756   | 3.4036618   |
| "Rgs17"   | 2.5076873   | 2.6447368   | 2.5582695   | 2.686369    | 2.5972      | 2.5643897   | 2.594769    | 2.6800356   |
| "Rgs18"   | 2.88637575  | 3.03692915  | 3.2518969   | 3.1270162   | 3.10929775  | 3.36665295  | 3.0263513   | 3.25346575  |
| "Rgs19"   | 3.50758725  | 3.20819025  | 4.2037853   | 4.12399315  | 4.0988784   | 5.0879565   | 4.9455624   | 4.19018365  |
| "Rgs2"    | 10.6793245  | 11.5000705  | 6.51379725  | 7.55082075  | 9.9156015   | 11.0368155  | 8.37246275  | 7.44235085  |
| "Rgs20"   | 2.516459    | 2.7296562   | 2.5940766   | 2.7203672   | 2.6004558   | 2.534461    | 2.5863862   | 2.6960282   |
| "Rgs3"    | 3.54839985  | 3.6625844   | 3.636526525 | 3.448390675 | 4.66683225  | 4.847479975 | 4.4310407   | 3.5015483   |
| "Rgs4"    | 2.6022504   | 4.49840065  | 4.59984015  | 4.60213735  | 4.6913773   | 4.46018935  | 4.4352467   | 5.0879498   |
| "Rgs5"    | 9.30402175  | 9.2407031   | 9.674016625 | 9.92652125  | 9.310824    | 9.3091447   | 9.371709375 | 10.0464365  |
| "Rgs6"    | 2.736449    | 2.9473877   | 2.871211    | 2.9868898   | 2.8710217   | 2.767224    | 2.87078     | 2.928565    |
| "Rgs9"    | 2.4647257   | 2.498632    | 2.4798043   | 2.5536969   | 2.4789689   | 2.4531589   | 2.4767244   | 2.54632     |
| "Rhbdd1"  | 5.9739857   | 7.228863    | 6.0458694   | 6.1773024   | 6.4595113   | 6.813071    | 5.749905    | 6.2382936   |
| "Rhbdd2"  | 2.7226926   | 2.9648892   | 2.749309733 | 2.8271608   | 2.7407897   | 2.706967967 | 2.756837167 | 2.724712067 |
| "Rhbdd3"  | 4.478693933 | 5.161771833 | 5.2862928   | 5.142879133 | 5.166722433 | 5.2240886   | 5.128972033 | 5.1308708   |
| "Rhbdf1"  | 6.5587378   | 7.0338006   | 7.407531    | 7.1604996   | 7.299304    | 6.737833    | 7.1513195   | 7.1435986   |
| "Rhbdl1"  | 5.042255    | 6.2267156   | 7.064042    | 6.7819486   | 6.0099063   | 5.725149    | 6.0185375   | 6.419139    |
| "Rhbdl3"  | 2.8387604   | 3.0596578   | 3.2891268   | 4.13972015  | 3.0177796   | 2.7072606   | 3.7155698   | 3.34504845  |
| "Rheb"    | 11.554715   | 12.028956   | 11.727935   | 11.858881   | 11.781591   | 11.962826   | 11.863298   | 11.845015   |
| "Rheb1"   | 5.0190787   | 6.487908    | 5.371762    | 5.0224214   | 6.1967697   | 5.889105    | 4.5716066   | 5.432463    |
| "Rho"     | 2.3095055   | 2.3588412   | 2.331726    | 2.4979534   | 2.292793    | 2.304387    | 2.3316212   | 2.4006557   |
| "Rhoa"    | 10.3036415  | 9.827098    | 10.358847   | 10.152083   | 10.317501   | 10.4266835  | 10.5454105  | 10.355496   |
| "Rhob"    | 8.291462    | 8.432583    | 7.1434026   | 7.4950037   | 8.457573    | 8.813026    | 8.2655945   | 7.514028    |
| "Rhobtb2" | 4.689444    | 4.757709    | 5.2225704   | 6.040557    | 4.70477     | 4.387086    | 4.827331    | 4.8928795   |
| "Rhoc"    | 6.7984755   | 6.1756048   | 6.8922086   | 6.43676115  | 6.7353655   | 6.5256875   | 7.41875735  | 6.2685609   |
| "Rhod"    | 3.2403705   | 1.9611553   | 1.9422437   | 2.0079226   | 1.940752    | 1.924815    | 1.9389422   | 2.006164    |
| "Rhog"    | 5.5408735   | 3.318334    | 4.9535694   | 4.645678    | 5.1064463   | 5.8047104   | 5.678035    | 5.1259203   |
| "Rhoh"    | 2.630795    | 2.850593    | 2.821729    | 2.8703117   | 2.818435    | 3.064286    | 2.8859997   | 2.8985002   |
| "Rhoj"    | 9.6553955   | 9.132917    | 9.414081    | 8.40921     | 9.336285    | 9.810545    | 8.87167     | 8.900272    |
| "Rhoq"    | 10.822965   | 10.749011   | 11.925908   | 12.072203   | 11.414791   | 11.127989   | 11.95045    | 12.0268345  |
| "Rhot1"   | 8.844346    | 9.048204    | 9.115566    | 9.132859    | 8.940195    | 8.904698    | 9.017238    | 8.972779    |
| "Rhot2"   | 7.627646    | 8.170657    | 8.303172    | 8.586867    | 7.92895     | 7.326823    | 8.187179    | 8.515476    |
| "Rhou"    | 10.0680635  | 9.150792    | 7.7915516   | 7.46174885  | 9.7949345   | 9.52905475  | 8.8061525   | 7.9114773   |
| "Rhov"    | 2.6335766   | 2.6891422   | 2.6643016   | 2.7539186   | 2.660288    | 2.629615    | 2.6504533   | 2.7333124   |
| "Rhox2a"  | 2.2359889   | 2.2861173   | 2.561071    | 2.3603225   | 2.264377    | 2.2199686   | 2.2594683   | 2.3093944   |
| "Rhox4b"  | 8.130405    | 8.92416     | 7.691317    | 6.3396993   | 8.811294    | 8.4003315   | 8.75032     | 7.4352393   |
| "Rhox5"   | 2.3190646   | 2.4151063   | 2.3552823   | 2.4438453   | 2.3565762   | 2.33458     | 2.3580644   | 2.4242835   |
| "Rhox6"   | 2.5636134   | 2.679405    | 2.6289773   | 2.7428014   | 2.6273243   | 2.6006746   | 2.6222      | 2.7013733   |
| "Rhox9"   | 2.628324    | 2.7575257   | 2.66744     | 3.0515473   | 2.6722865   | 2.5473762   | 2.6630607   | 2.7054567   |
| "Rhpn2"   | 5.2097365   | 6.69272935  | 5.93493025  | 5.2504475   | 7.444547    | 5.8900235   | 5.6645913   | 5.3140333   |
| "Rian"    | 3.844287133 | 2.988436633 | 4.289225833 | 3.192283467 | 3.1330289   | 3.0145007   | 3.874325933 | 3.027730533 |
| "Ribc1"   | 3.3639176   | 3.4512553   | 3.4005933   | 3.4820554   | 3.4058177   | 3.362598    | 3.3996959   | 3.4756773   |
| "Ric8"    | 6.59600475  | 6.55373825  | 6.5817499   | 6.4520583   | 6.9374039   | 6.95832475  | 6.9554825   | 6.6726785   |
| "Rif1"    | 6.3032198   | 7.0370333   | 6.71813875  | 7.106704    | 7.03356785  | 6.8700095   | 6.5436087   | 6.983441    |
| "Rilpl1"  | 8.5309317   | 9.021551    | 8.3893286   | 8.71511325  | 8.8650133   | 8.444846    | 8.28455685  | 9.335241    |
| "Rilpl2"  | 6.6353364   | 4.7236247   | 4.7264977   | 4.745477    | 5.8802094   | 5.9368505   | 5.538699    | 5.1541224   |
| "Rimklb"  | 2.882456825 | 3.105852    | 3.061773625 | 3.147383225 | 2.980919425 | 2.887739225 | 2.9529243   | 3.047285375 |
| "Rims2"   | 2.9745655   | 3.2966106   | 3.1044147   | 3.2975469   | 3.102963    | 2.9983      | 3.077947    | 3.2253685   |
| "Rin1"    | 3.181105    | 3.1870694   | 3.052063    | 3.199655    | 3.2023118   | 3.005371    | 3.2488644   | 3.2121193   |
| "Rin2"    | 7.015117    | 6.595007    | 7.1049657   | 6.6830215   | 7.4495535   | 7.653383    | 6.5345907   | 7.0541134   |
| "Ring1"   | 4.928801    | 4.9494915   | 4.9511366   | 5.0010715   | 4.9373856   | 4.9387093   | 4.937526    | 4.9915495   |
| "Riok1"   | 5.0286933   | 5.5328572   | 4.777378133 | 5.076169133 | 5.2495239   | 5.348641533 | 4.8939518   | 4.934394467 |
| "Riok2"   | 7.3758651   | 7.4047828   | 6.30372955  | 7.346083    | 7.237761    | 7.3429215   | 6.80471325  | 7.29010735  |
| "Riok3"   | 8.791337925 | 9.2196565   | 8.8530258   | 9.003664575 | 8.51556945  | 8.7971089   | 8.986398175 | 8.85129435  |
| "Ripk1"   | 4.18207065  | 3.57189625  | 3.8110906   | 3.4975631   | 4.19534405  | 4.577331    | 3.7871579   | 3.3793894   |
| "Ripk2"   | 2.6237807   | 2.805751    | 2.805128    | 2.8987868   | 2.8052225   | 2.7882113   | 2.8030384   | 2.8908803   |
| "Ripk3"   | 2.6688137   | 2.3664978   | 2.3710854   | 2.4254618   | 2.3699331   | 2.5088508   | 2.62848     | 2.433825    |
| "Ripk4"   | 3.739941    | 2.9876262   | 2.9456336   | 3.0368779   | 2.9246675   | 3.0159595   | 2.92492185  | 3.0142599   |
| "Ripply3" | 4.03873     | 3.5292096   | 3.3492408   | 3.2262845   | 3.4218      | 3.7955716   | 3.3526473   | 3.5158558   |
| "Rit1"    | 7.21905375  | 7.6500106   | 6.0091943   | 6.0389495   | 6.97596965  | 8.5269818   | 6.54992675  | 6.4421915   |
| "Rit2"    | 2.5659266   | 2.7183328   | 2.624524433 | 2.744634933 | 2.628976    | 2.589841467 | 2.6214287   | 2.717923167 |
| "Rlbp1"   | 2.5855248   | 2.7393432   | 2.671863    | 2.786901    | 2.6788871   | 2.6210656   | 2.6720228   | 2.7640595   |
| "Rlf"     | 7.4541764   | 7.79808     | 6.30368     | 6.2911816   | 7.016421    | 7.6810966   | 6.470507    | 6.614117    |
| "Rlim"    | 5.239971525 | 6.029069575 | 5.161866725 | 5.335640025 | 5.74436095  | 5.6064139   | 5.3660355   | 5.3491607   |
| "Rln1"    | 2.431821    | 2.4833658   | 2.4494286   | 2.5514867   | 2.452363    | 2.415167    | 2.4461668   | 2.5545864   |
| "Rmi1"    | 6.8594089   | 6.75226595  | 6.89204375  | 6.9754825   | 7.01120075  | 6.83013     | 7.29681135  | 6.97454685  |
| "Rmnd1"   | 6.4747567   | 5.931317    | 6.547863    | 6.911956    | 6.4307356   | 5.7220626   | 6.7264752   | 6.944106    |
| "Rmnd5a"  | 10.748536   | 11.38843    | 10.8810005  | 11.08298    | 10.855884   | 11.037701   | 10.924456   | 11.0946665  |
| "Rmnd5b"  | 6.3532047   | 6.34004     | 6.53563     | 6.776267    | 6.4760065   | 6.623786    | 6.4977646   | 6.5864325   |
| "Rnase1"  | 2.4626184   | 2.3117433   | 2.2809782   | 2.4083529   | 2.269147    | 2.2849536   | 2.242734    | 2.353068    |
| "Rnase4"  | 12.84065    | 10.1684885  | 11.081491   | 10.333954   | 11.498537   | 11.599178   | 10.409228   | 10.549852   |
| "Rnaseh1" | 5.8610587   | 6.8474917   | 5.371396    | 5.3858786   | 5.766148    | 5.9354286   | 5.4783387   | 5.6370378   |

|            |             |             |             |             |             |             |             |             |
|------------|-------------|-------------|-------------|-------------|-------------|-------------|-------------|-------------|
| "Rnaseh2c" | 7.563540133 | 7.296416567 | 7.497355667 | 7.625545467 | 7.259790067 | 7.377551167 | 7.804177    | 7.412463667 |
| "Rnasek"   | 7.995879    | 8.173068    | 7.8523207   | 8.0061      | 7.988553    | 7.914207    | 7.9987006   | 8.008512    |
| "Rnase1"   | 3.565305    | 3.21201715  | 3.6814742   | 3.2129419   | 4.4623653   | 4.57630655  | 4.07944535  | 3.5945494   |
| "Rnaset2a" | 11.4572015  | 11.0770875  | 11.659003   | 11.6816605  | 11.3849535  | 11.03501375 | 11.7628875  | 11.587604   |
| "Rnd2"     | 3.7448282   | 3.5752397   | 4.0498953   | 3.7040834   | 3.7833967   | 3.2862208   | 3.61126     | 3.6335802   |
| "Rnd3"     | 4.5669937   | 3.3631747   | 4.23735075  | 4.3332253   | 4.5080998   | 4.17411115  | 4.1320526   | 4.10006365  |
| "Rnf10"    | 9.529311    | 9.79543     | 9.5965605   | 9.847126    | 9.3645      | 9.500413    | 9.944661    | 9.86036     |
| "Rnf103"   | 9.921899    | 9.870227    | 8.572695    | 9.12463     | 9.278526    | 9.446061    | 8.5193615   | 9.237104    |
| "Rnf11"    | 8.000688833 | 8.214367533 | 9.050966433 | 9.306604667 | 8.2078955   | 7.836420667 | 8.8087209   | 9.208615867 |
| "Rnf111"   | 7.2755127   | 7.309274    | 7.084897    | 6.641411    | 7.272462    | 7.8443766   | 7.0201435   | 6.7678366   |
| "Rnf112"   | 2.5251548   | 2.704768    | 2.5727458   | 2.762457    | 2.577332    | 2.5278587   | 2.5711832   | 2.6835778   |
| "Rnf113a1" | 3.5119894   | 4.100194    | 3.8485804   | 3.902409    | 4.222317    | 3.8287294   | 3.8448248   | 3.776155    |
| "Rnf114"   | 7.870616    | 8.2204979   | 7.357231    | 7.621279467 | 7.812971833 | 8.017739167 | 6.895351167 | 7.8535158   |
| "Rnf115"   | 10.6676775  | 11.22370775 | 10.401647   | 10.998803   | 10.893119   | 11.782948   | 10.08739625 | 10.71175975 |
| "Rnf121"   | 5.06836375  | 5.0662316   | 4.9981577   | 4.90218375  | 4.8220878   | 4.81598655  | 4.69235715  | 4.94103625  |
| "Rnf123"   | 7.135129    | 7.850578    | 7.8888516   | 8.0261      | 7.594835    | 7.4758863   | 7.3279157   | 8.048348    |
| "Rnf126"   | 8.300342    | 9.305268    | 8.238299    | 8.855269    | 7.8066115   | 7.849833    | 9.116334    | 8.179019    |
| "Rnf128"   | 9.453451    | 7.0566364   | 8.5632875   | 7.9860425   | 8.5213355   | 6.502188    | 8.586233    | 8.2173135   |
| "Rnf13"    | 8.1472318   | 7.2159125   | 7.517932    | 7.564714    | 7.60394575  | 7.43873015  | 7.74846435  | 7.7373305   |
| "Rnf130"   | 9.266009    | 8.900338    | 9.6236725   | 9.381964    | 9.191826    | 9.32835     | 9.586865    | 9.307287    |
| "Rnf135"   | 3.9346673   | 4.194735    | 4.4879456   | 4.9158497   | 4.2859163   | 4.4782963   | 4.5276384   | 4.6423388   |
| "Rnf138"   | 5.1963219   | 5.3284014   | 4.988691467 | 5.193887033 | 5.274885667 | 5.110963233 | 4.8046961   | 5.323815833 |
| "Rnf14"    | 5.1550565   | 5.437032375 | 5.261853675 | 5.741943325 | 5.119110425 | 5.069184925 | 5.276567775 | 5.4995819   |
| "Rnf141"   | 4.05094575  | 3.949956425 | 4.097080475 | 4.05367125  | 4.028394    | 3.933123575 | 4.16613115  | 4.069325875 |
| "Rnf144b"  | 3.1489136   | 2.673976    | 2.6270776   | 2.7689812   | 2.6663423   | 2.606697    | 2.6253417   | 2.7225838   |
| "Rnf145"   | 7.2695465   | 6.499387    | 7.7509995   | 7.3341026   | 7.653503    | 7.966588    | 8.280063    | 7.438207    |
| "Rnf146"   | 7.3054049   | 8.067741167 | 6.791546367 | 7.025289467 | 7.4341474   | 7.614214267 | 6.759689333 | 6.9172958   |
| "Rnf149"   | 8.571952    | 6.682628    | 6.704887    | 6.8222413   | 7.043298    | 7.3513966   | 7.2300534   | 7.087631    |
| "Rnf151"   | 2.3581731   | 2.4409397   | 2.3959293   | 2.4699163   | 2.4011884   | 2.3876588   | 2.3963127   | 2.468741    |
| "Rnf157"   | 4.266719    | 4.4684283   | 5.2401445   | 5.99298515  | 4.38596125  | 4.29874715  | 5.4518373   | 4.603102    |
| "Rnf166"   | 8.237679    | 8.590202    | 8.45533     | 8.515884    | 8.476736    | 8.416923    | 8.4510355   | 8.486165    |
| "Rnf167"   | 6.4518766   | 6.8690853   | 6.234006    | 6.420921    | 6.804661    | 6.8205595   | 6.519705    | 6.6828604   |
| "Rnf17"    | 2.31571545  | 2.398134    | 2.3498434   | 2.4545057   | 2.3526124   | 2.31806175  | 2.34760595  | 2.44762265  |
| "Rnf181"   | 8.805649    | 9.151249    | 9.022674    | 9.052269    | 9.394558    | 9.817102    | 9.203783    | 9.0287075   |
| "Rnf185"   | 6.53721     | 5.939994    | 6.4726415   | 6.318904    | 5.9789343   | 6.0780497   | 6.2577257   | 5.85428     |
| "Rnf187"   | 8.8163588   | 8.8303543   | 9.1799265   | 8.9884546   | 8.8267415   | 8.67525225  | 9.292521    | 8.972251    |
| "Rnf19a"   | 6.1408907   | 6.3249065   | 5.66363555  | 5.640966    | 6.10239785  | 6.0240403   | 5.7838631   | 5.8779804   |
| "Rnf19b"   | 5.60567165  | 5.52712845  | 5.30896435  | 5.3218019   | 5.3759145   | 5.41617515  | 5.33062695  | 5.35893245  |
| "Rnf2"     | 5.018745325 | 5.15307355  | 4.934386575 | 5.012660575 | 5.1848518   | 5.1519232   | 4.942698025 | 5.0408787   |
| "Rnf20"    | 4.9267622   | 5.285437133 | 5.0107758   | 5.069534833 | 5.056071333 | 5.2326764   | 4.998087667 | 5.186199133 |
| "Rnf207"   | 2.4413567   | 2.5408754   | 2.4775116   | 2.5874004   | 2.4817297   | 2.4396405   | 2.47615     | 2.5901833   |
| "Rnf214"   | 6.10299335  | 6.1144943   | 5.9652382   | 6.13169515  | 6.0074177   | 6.0501345   | 6.0283949   | 6.3419888   |
| "Rnf219"   | 3.0777602   | 3.4465833   | 3.2864573   | 3.4147122   | 3.2845082   | 3.1938424   | 3.2831986   | 3.3929486   |
| "Rnf220"   | 6.9279532   | 7.569693    | 7.054921    | 6.9200087   | 6.7855296   | 6.954969    | 6.9349513   | 6.998266    |
| "Rnf25"    | 6.5914097   | 7.168104    | 6.6769857   | 6.666486    | 6.8786516   | 6.6563406   | 6.5043616   | 6.4608927   |
| "Rnf26"    | 4.84249465  | 5.14302735  | 5.08672905  | 4.806509    | 5.16457     | 5.07204165  | 4.94293895  | 4.9740704   |
| "Rnf34"    | 6.9077697   | 7.323157    | 7.676588    | 7.669866    | 7.2611947   | 7.2657847   | 7.171578    | 7.4531617   |
| "Rnf38"    | 6.8749175   | 6.9240093   | 6.659936    | 6.9431357   | 7.4119663   | 7.334266    | 6.7012515   | 7.0124984   |
| "Rnf4"     | 6.0129035   | 5.6416163   | 5.0163293   | 5.23996055  | 5.724233    | 6.14492015  | 5.32136065  | 5.3959174   |
| "Rnf41"    | 4.4412067   | 4.64455845  | 4.6411013   | 4.4899046   | 4.7084954   | 4.69213965  | 4.6428689   | 4.7004163   |
| "Rnf43"    | 2.3957677   | 2.4843843   | 2.437113    | 2.5237417   | 2.4425607   | 2.3991091   | 2.44106     | 2.5172486   |
| "Rnf44"    | 7.7443933   | 7.7475386   | 7.328617    | 7.450221    | 7.7323966   | 7.840049    | 7.713664    | 7.4964128   |
| "Rnf5"     | 5.913342    | 5.1150966   | 6.1239185   | 6.2779646   | 5.737008    | 5.658151    | 6.2788906   | 6.008251    |
| "Rnf6"     | 9.0177115   | 9.9166555   | 9.3965745   | 9.522194    | 9.5910445   | 9.75325475  | 9.37802     | 9.459428    |
| "Rnf8"     | 7.7936788   | 8.300414    | 7.8876376   | 8.155065    | 7.489722    | 7.822269    | 7.819083    | 7.9125667   |
| "Rnft1"    | 8.359705    | 8.481561    | 8.924731    | 9.294457    | 8.393259    | 8.273828    | 9.039536    | 9.225942    |
| "Rngtt"    | 2.83836255  | 2.94675275  | 2.92260945  | 3.0650716   | 2.9720875   | 2.94195915  | 2.9753099   | 3.0219197   |
| "Rnh1"     | 9.44419     | 9.268053    | 9.059335    | 8.758236    | 9.243665    | 9.183566    | 9.65913     | 8.937823    |
| "Rnmt"     | 8.278901    | 9.359649    | 8.679342    | 8.677297    | 8.933794    | 9.668446    | 8.6994      | 8.52736     |
| "Rnmtl1"   | 6.416216    | 7.272273    | 5.8038697   | 6.4558296   | 6.872922    | 6.655541    | 5.9199357   | 5.917449    |
| "Rnpc3"    | 6.2869625   | 7.46287765  | 6.2328186   | 6.61600565  | 6.6054698   | 7.12808155  | 6.19092375  | 6.800726    |
| "Rnpep"    | 5.4640527   | 4.814005    | 5.7592125   | 5.7059727   | 5.5737944   | 5.575059    | 5.897781    | 6.0863805   |
| "Rnpepl1"  | 8.802347    | 8.924228    | 8.972569    | 8.9237175   | 8.73665     | 8.556194    | 9.010021    | 8.823605    |
| "Rnps1"    | 9.5794715   | 9.9067925   | 9.73026975  | 9.9076505   | 9.7991115   | 9.737915    | 9.8269405   | 9.8256345   |
| "Robo1"    | 3.4478097   | 3.6044385   | 3.8534195   | 3.8152583   | 3.5083022   | 3.5100052   | 3.5249052   | 3.9242835   |
| "Robo3"    | 2.473936    | 2.5539432   | 2.5130022   | 2.6308117   | 2.5155804   | 2.4721415   | 2.5114474   | 2.6130514   |
| "Robo4"    | 6.4040203   | 6.0927672   | 5.999489    | 6.198391    | 6.586811    | 6.809212    | 6.271867    | 6.596834    |
| "Rock1"    | 7.346658125 | 7.02246995  | 7.2519      | 7.24784575  | 7.346355325 | 7.623236575 | 7.3990606   | 7.56241035  |
| "Rock2"    | 7.5011461   | 7.3185185   | 7.70649865  | 7.50278165  | 7.2588165   | 7.215221    | 7.754722    | 7.7863215   |
| "Rod1"     | 4.7601803   | 4.438395433 | 4.5257004   | 4.422759867 | 4.729987067 | 5.053228467 | 4.636749033 | 4.553279767 |
| "Rogdi"    | 4.4606915   | 4.250853    | 4.6994014   | 4.511151    | 4.4811106   | 4.4526477   | 4.70315     | 4.294191    |
| "Rom1"     | 4.4177046   | 5.176449    | 5.220935    | 5.354807    | 5.387693    | 5.1249385   | 5.104939    | 5.366769    |
| "Romo1"    | 11.678899   | 11.833146   | 12.037635   | 12.005466   | 11.665344   | 11.4077215  | 12.049258   | 12.016236   |
| "Ropn1"    | 4.467758    | 2.8258102   | 2.7449288   | 2.8955522   | 2.7989376   | 2.7715225   | 2.7899933   | 2.8740473   |
| "Ror2"     | 3.166913    | 3.3402948   | 3.6127284   | 3.500093    | 3.2490542   | 3.2740011   | 3.3039086   | 3.3826032   |
| "Rora"     | 7.937005433 | 8.391987467 | 7.2792752   | 7.341198    | 7.700728233 | 8.0492545   | 7.3522721   | 7.3736209   |
| "Rorc"     | 6.5765835   | 7.8582395   | 5.2055923   | 5.3286885   | 6.4774595   | 5.78948595  | 6.1309797   | 5.27827405  |
| "Ros1"     | 2.3921432   | 2.5447733   | 2.4490206   | 2.5635812   | 2.4548957   | 2.3906674   | 2.4478762   | 2.53876     |
| "Rp1"      | 2.658898    | 2.8182824   | 2.7304602   | 2.8844855   | 2.7359977   | 2.6666765   | 2.728514    | 2.840223    |
| "Rp2h"     | 3.5538241   | 3.721121633 | 3.532842967 | 3.908649533 | 3.601575533 | 3.576745467 | 3.596084333 | 3.7680156   |
| "Rp9"      | 8.930219    | 8.454394    | 9.486209    | 9.632612    | 9.017699    | 8.671099    | 9.275504    | 9.398457    |

|              |             |             |             |             |             |             |             |             |
|--------------|-------------|-------------|-------------|-------------|-------------|-------------|-------------|-------------|
| "Rpa1"       | 9.311247    | 10.09823725 | 9.786738    | 9.574143    | 9.84153     | 9.2610325   | 9.813221    | 9.608551    |
| "Rpa2"       | 6.79958415  | 7.571527    | 7.22549765  | 7.39106105  | 7.4081652   | 6.89940185  | 6.697302    | 7.35255595  |
| "Rpa3"       | 6.1056356   | 5.7665887   | 6.470645    | 6.751329    | 6.4347935   | 5.96408     | 7.128808    | 6.9312057   |
| "Rpap1"      | 5.3200116   | 5.80583765  | 5.75695     | 5.8408656   | 5.27921315  | 5.1444671   | 5.70911145  | 5.785681    |
| "Rpap2"      | 6.769653    | 6.522344    | 6.5154033   | 6.781381    | 6.7045784   | 6.3459945   | 7.1743765   | 7.0796285   |
| "Rpap3"      | 7.4183326   | 7.3453736   | 7.0091515   | 7.532785    | 7.3577437   | 6.9472647   | 7.3430295   | 7.7504344   |
| "Rpe"        | 5.1067555   | 4.9189066   | 5.123744667 | 5.221801867 | 5.135044233 | 5.143173    | 5.5975324   | 5.1804551   |
| "Rpe65"      | 2.309087    | 2.3983514   | 2.3495278   | 2.4358945   | 2.3529506   | 2.3169394   | 2.3476784   | 2.447567    |
| "Rpf1"       | 8.000407    | 9.042044    | 7.7239175   | 7.7898498   | 8.499611    | 8.835503    | 7.8807054   | 7.662195    |
| "Rpf2"       | 6.217724767 | 6.954636967 | 6.205795467 | 6.648793867 | 6.3161343   | 6.456332567 | 6.2698495   | 6.546950933 |
| "Rpg"        | 3.6252553   | 3.5990431   | 3.2612722   | 3.6921449   | 3.6543539   | 3.3893504   | 3.5330203   | 3.651261    |
| "Rpgrip1"    | 3.40530245  | 3.709720875 | 3.513233375 | 3.599808375 | 3.522486875 | 3.79259535  | 3.3981492   | 3.5514038   |
| "Rph3a"      | 3.057781    | 3.1308203   | 3.0894713   | 3.187997    | 3.091052    | 3.0551755   | 3.0880063   | 3.1786404   |
| "Rpia"       | 7.4104724   | 7.4840665   | 8.819398    | 8.803598    | 7.821894    | 7.3355503   | 9.033939    | 8.646078    |
| "Rpl10a"     | 13.158953   | 13.403713   | 13.147339   | 12.878106   | 13.111905   | 13.148      | 13.387566   | 12.9430685  |
| "Rpl11"      | 12.715536   | 12.86805    | 12.75714    | 12.48064    | 12.77435    | 12.708273   | 13.05393    | 12.53858    |
| "Rpl13a"     | 11.43959075 | 11.261664   | 11.132548   | 11.00522675 | 11.17438    | 11.23107438 | 11.52698675 | 11.7065425  |
| "Rpl14"      | 11.59240825 | 11.8331544  | 11.73295158 | 11.68508033 | 11.52037965 | 11.5245119  | 12.01751692 | 11.65584622 |
| "Rpl17"      | 6.728524    | 6.864237    | 6.859946    | 6.5302963   | 6.5943494   | 6.8442593   | 7.1892433   | 6.368267    |
| "Rpl18"      | 10.26569945 | 10.37277368 | 10.2658742  | 10.08333325 | 10.1756981  | 10.26546925 | 10.6408752  | 10.13201543 |
| "Rpl221"     | 11.905426   | 13.204937   | 12.581343   | 12.819939   | 12.663181   | 12.653982   | 12.235115   | 12.701315   |
| "Rpl24"      | 8.8443155   | 9.287095    | 9.0164343   | 9.50254     | 8.9157939   | 8.8670346   | 9.1651072   | 8.96429215  |
| "Rpl26"      | 14.197285   | 14.123705   | 14.1616975  | 13.9125335  | 14.0635145  | 14.1467675  | 14.839576   | 13.9687145  |
| "Rpl27"      | 12.170031   | 12.25036433 | 12.18381733 | 12.35966133 | 12.155675   | 12.04367933 | 12.46654033 | 12.289273   |
| "Rpl35"      | 11.79572127 | 11.85721075 | 11.74113863 | 11.7016216  | 11.71887992 | 11.67314473 | 12.0084424  | 11.73185977 |
| "Rpl36a"     | 12.84032    | 12.900539   | 12.659337   | 12.333795   | 12.521143   | 12.618965   | 13.149301   | 12.361498   |
| "Rpl37a"     | 11.42072867 | 11.45633733 | 11.27825047 | 11.0115909  | 11.29411533 | 11.30088167 | 11.3933531  | 10.95312487 |
| "Rpl38"      | 14.25371    | 14.300651   | 14.160194   | 13.815451   | 14.174576   | 14.155593   | 14.336781   | 13.741602   |
| "Rpl391"     | 2.631993    | 2.7829347   | 2.7306125   | 2.8151069   | 2.7347052   | 2.7169168   | 2.7297766   | 2.7762222   |
| "Rpl31"      | 12.463504   | 13.145736   | 13.006008   | 13.206082   | 13.006361   | 12.633035   | 12.915348   | 13.237006   |
| "Rpl4"       | 14.011027   | 14.247368   | 14.066461   | 14.043784   | 13.949085   | 14.102554   | 14.297435   | 14.047417   |
| "Rpl41"      | 8.585733    | 9.12124755  | 8.9376166   | 8.738168    | 8.987124375 | 8.9850334   | 8.964406775 | 8.604610675 |
| "Rpl6"       | 12.345556   | 12.3530655  | 12.34917    | 12.004005   | 12.233361   | 12.304644   | 12.620785   | 12.089089   |
| "Rpl7"       | 9.973275575 | 9.961786375 | 9.99522305  | 9.9856929   | 9.8873492   | 9.897908675 | 10.21764955 | 9.9962968   |
| "Rpl711"     | 6.8226128   | 6.69402715  | 7.2069582   | 7.25528035  | 6.94819665  | 7.15398145  | 7.5205717   | 7.18055555  |
| "Rpl8"       | 12.383493   | 12.476737   | 12.493932   | 12.347976   | 12.317394   | 12.494586   | 12.745675   | 12.411011   |
| "Rpl9"       | 8.269248    | 8.6066079   | 8.3967159   | 8.4981059   | 8.31867045  | 8.3527994   | 8.4290292   | 8.34298335  |
| "Rplp0"      | 14.74132    | 14.698048   | 14.695557   | 14.527479   | 14.61984    | 14.604054   | 14.834435   | 14.553059   |
| "Rplp2"      | 14.744887   | 14.814366   | 14.562272   | 14.397758   | 14.7198     | 14.725845   | 14.912123   | 14.413677   |
| "Rpn1"       | 9.3194507   | 9.6011605   | 9.806135    | 9.5916602   | 9.5655738   | 9.6733192   | 9.6648319   | 9.3581134   |
| "Rpn2"       | 8.102832    | 7.7443595   | 8.507325    | 7.9946914   | 8.043664    | 7.9269595   | 8.207521    | 8.159331    |
| "Rpp14"      | 7.7030804   | 8.294249    | 8.11678     | 8.281019    | 7.80645845  | 7.3654665   | 8.073863    | 8.244726    |
| "Rpp21"      | 8.619931    | 8.921726    | 8.982332    | 8.880014    | 8.85816     | 8.591294    | 8.960793    | 8.854928    |
| "Rpp25"      | 2.29245     | 2.4286318   | 2.4114442   | 2.4960785   | 2.389092    | 2.3684747   | 2.4083774   | 2.473934    |
| "Rpp30"      | 7.8492064   | 8.689576    | 8.342148    | 8.316661    | 8.12147     | 8.358068    | 8.482682    | 8.410217    |
| "Rpp40"      | 5.6194844   | 6.594029    | 6.1365976   | 6.4808135   | 6.2935696   | 5.6847267   | 6.217247    | 6.592249    |
| "Rprd1a"     | 5.9568706   | 6.2148045   | 6.36592625  | 6.39698375  | 5.8786414   | 6.0334606   | 6.48516915  | 6.4159102   |
| "Rprd1b"     | 8.1080823   | 9.723298    | 7.2247867   | 7.318783    | 8.33153325  | 8.68275635  | 7.30959885  | 7.2185595   |
| "Rprd2"      | 4.453149    | 4.9961205   | 4.7280693   | 4.7496195   | 4.9041853   | 4.7264724   | 4.6349425   | 4.7328806   |
| "Rprm"       | 2.6528249   | 2.9272637   | 2.7215748   | 2.9219136   | 2.7200747   | 2.719015    | 2.7240648   | 2.842265    |
| "Rps10"      | 11.30491442 | 11.1463007  | 11.19725657 | 11.05943253 | 11.14571775 | 11.26235247 | 11.47376722 | 11.1318415  |
| "Rps11"      | 12.87223    | 12.874538   | 12.823839   | 12.626361   | 12.846645   | 12.831628   | 13.296861   | 12.669318   |
| "Rps14"      | 13.593994   | 13.7622295  | 13.5627605  | 13.4918185  | 13.5240855  | 13.671011   | 13.7406625  | 13.4324615  |
| "Rps15a-ps6" | 3.3717918   | 3.8856676   | 3.67023     | 3.7365804   | 3.6439953   | 3.4554667   | 3.5682826   | 3.7257586   |
| "Rps15a"     | 13.654565   | 13.672689   | 13.566495   | 13.547435   | 13.537331   | 13.577934   | 13.87257    | 13.725599   |
| "Rps17"      | 10.25912135 | 10.08834955 | 9.9845425   | 9.817620533 | 9.9467207   | 9.9361132   | 10.12588848 | 9.872313883 |
| "Rps18"      | 9.2306603   | 9.27642708  | 9.10670652  | 9.08076336  | 9.12095442  | 9.14114904  | 9.37891376  | 9.08873996  |
| "Rps19"      | 7.364453    | 7.51112285  | 7.35560015  | 7.18778715  | 7.34932635  | 7.5631945   | 7.5273763   | 7.22819675  |
| "Rps2"       | 13.866204   | 13.960012   | 13.921144   | 13.910508   | 13.885643   | 13.828287   | 13.957842   | 13.927807   |
| "Rps20"      | 8.768526575 | 8.787438    | 8.669674375 | 8.8347616   | 8.593330975 | 8.522766075 | 8.863174925 | 8.8059163   |
| "Rps23"      | 13.765131   | 13.937969   | 13.836846   | 13.584111   | 13.811961   | 13.900606   | 13.978805   | 13.685127   |
| "Rps24"      | 8.62194125  | 9.89318     | 9.4761595   | 9.512815    | 9.9593305   | 9.95068825  | 9.8620265   | 9.6929677   |
| "Rps25"      | 6.9725566   | 8.115615    | 7.13525     | 6.5527186   | 7.3881483   | 7.6559596   | 6.974561    | 6.288216    |
| "Rps27"      | 3.8207808   | 5.8180113   | 3.5351138   | 3.1655965   | 3.7099593   | 3.9241192   | 3.593049    | 3.2211637   |
| "Rps271"     | 12.4083905  | 12.16727883 | 12.38598933 | 12.23766967 | 12.07707767 | 11.622586   | 12.6344945  | 12.23723467 |
| "Rps28"      | 14.28543967 | 14.31883633 | 14.12929133 | 13.84512333 | 14.132895   | 14.17370733 | 14.30410517 | 13.879959   |
| "Rps29"      | 14.597053   | 14.66717033 | 14.53092067 | 14.453113   | 14.54706833 | 14.53703783 | 14.591668   | 14.42297083 |
| "Rps3"       | 12.692025   | 12.561142   | 12.565433   | 12.209944   | 12.524663   | 12.687662   | 12.951347   | 12.271996   |
| "Rps3a"      | 14.008151   | 14.140633   | 14.127519   | 13.916712   | 14.030293   | 14.097903   | 14.279711   | 13.88838    |
| "Rps4x"      | 13.95322    | 14.014157   | 13.964665   | 13.713648   | 13.8362     | 13.955502   | 14.181046   | 13.771375   |
| "Rps4y2"     | 6.25168     | 5.9096746   | 6.0821295   | 5.451197    | 5.7140017   | 5.6619537   | 5.6627173   | 5.6433926   |
| "Rps5"       | 14.117908   | 14.225735   | 13.991631   | 13.833976   | 13.906706   | 14.004099   | 14.226194   | 13.787919   |
| "Rps6"       | 9.133597864 | 9.166188345 | 9.238833373 | 9.2179732   | 9.210701382 | 9.330281009 | 9.40219     | 9.334394582 |
| "Rps6ka1"    | 2.89853     | 2.9709885   | 3.7223787   | 3.3359106   | 2.99267     | 4.174655    | 3.6496446   | 3.3770294   |
| "Rps6ka2"    | 7.023468    | 7.1237007   | 7.9773163   | 8.15281715  | 7.29631685  | 6.7272015   | 7.58662475  | 7.9249605   |
| "Rps6ka3"    | 8.0579642   | 7.7806398   | 8.2237825   | 8.0724623   | 7.6643628   | 7.44408     | 8.60712965  | 7.82888215  |
| "Rps6ka4"    | 4.014952    | 4.137393    | 4.5928845   | 4.244873    | 4.6452284   | 4.8170304   | 5.003806    | 4.2460046   |
| "Rps6kb1"    | 6.23556585  | 7.0470468   | 6.97983115  | 6.90713765  | 6.5898365   | 6.6764587   | 6.5771017   | 6.95112385  |
| "Rps6kb2"    | 2.6218538   | 2.6853273   | 2.5470743   | 2.6096778   | 2.5002956   | 2.4652922   | 2.5692425   | 2.5382946   |
| "Rps6kc1"    | 5.120573    | 5.3488855   | 5.457908    | 5.314869    | 5.264786    | 4.550185    | 5.3260813   | 5.314213    |
| "Rps7"       | 13.674211   | 13.614924   | 13.5851935  | 13.5108325  | 13.5157105  | 13.601348   | 13.891339   | 13.4940865  |

|           |             |             |             |             |             |             |             |             |
|-----------|-------------|-------------|-------------|-------------|-------------|-------------|-------------|-------------|
| "Rps9"    | 9.2395577   | 9.7953024   | 9.229674867 | 9.350451433 | 9.4870672   | 9.789959667 | 9.396624267 | 9.415457733 |
| "Rptn"    | 2.3929815   | 2.4888492   | 2.4319248   | 2.543043    | 2.4321508   | 2.3880074   | 2.430723    | 2.5334609   |
| "Rpusd4"  | 6.34705     | 6.7500443   | 6.3936877   | 6.4427977   | 6.6343036   | 6.447783    | 6.3432264   | 6.457125    |
| "Rqcd1"   | 5.4699035   | 5.3618646   | 6.1990876   | 6.0760026   | 5.364981    | 5.321224    | 6.164549    | 5.7318234   |
| "Rad"     | 4.3204637   | 2.928726    | 5.301546    | 3.9152856   | 3.604628    | 2.8972833   | 7.5255733   | 3.6711507   |
| "Rraga"   | 8.723511    | 9.153438    | 8.808622    | 8.589615    | 8.7803755   | 9.023859    | 8.602244    | 8.807599    |
| "Rragc"   | 8.896188    | 9.038782    | 8.623425    | 8.563584    | 9.049814    | 9.326771    | 8.893945    | 8.541898    |
| "Rragd"   | 3.0398173   | 3.2445662   | 3.2137377   | 3.3101294   | 3.1906538   | 3.0768533   | 3.2143168   | 3.2925968   |
| "Rras"    | 8.381451    | 7.7444763   | 7.8151746   | 7.7277417   | 8.211258    | 7.860442    | 8.522047    | 7.6955905   |
| "Rras2"   | 7.9548527   | 7.80842985  | 7.841409    | 7.6559332   | 7.467451    | 7.95674125  | 8.0402335   | 7.4995094   |
| "Rrbp1"   | 7.8549455   | 5.103265467 | 6.4619851   | 5.550896733 | 6.135858867 | 6.043655333 | 6.327305    | 5.8641091   |
| "Rreb1"   | 4.6364491   | 4.758988733 | 4.989728333 | 5.0709096   | 5.0213431   | 4.764366667 | 5.0123748   | 4.928044133 |
| "Rrm1"    | 6.00315     | 6.40005755  | 6.38071085  | 6.654688    | 6.2118935   | 5.5432567   | 6.16284945  | 6.588749    |
| "Rrm2"    | 3.6286858   | 3.203599567 | 2.883885067 | 2.961373433 | 3.209452733 | 4.392922433 | 3.4998817   | 3.208427933 |
| "Rrm2b"   | 6.622216    | 7.3942056   | 7.647941    | 7.8714237   | 7.7685223   | 7.1250343   | 7.722446    | 7.813076    |
| "Rrn3"    | 7.4407477   | 8.113421    | 7.805519    | 8.079431    | 7.877079    | 7.901331    | 7.8959284   | 8.16668     |
| "Rrnad1"  | 4.9118986   | 5.7745223   | 5.58452     | 5.2851763   | 6.054535    | 5.584383    | 5.6539626   | 5.657534    |
| "Rrp1"    | 7.405727    | 7.3442365   | 7.0897523   | 7.1930643   | 7.23906015  | 7.26755425  | 7.3640027   | 7.16811485  |
| "Rrp12"   | 7.9018235   | 8.34139     | 6.9212995   | 7.377332    | 7.834437    | 7.887848    | 6.793865    | 7.155031    |
| "Rrp15"   | 7.5196667   | 8.53236     | 7.417102    | 7.230463    | 7.693862    | 7.868683    | 6.943715    | 7.00653     |
| "Rrp1b"   | 5.310958567 | 5.5574241   | 5.25055867  | 5.398722933 | 5.3537252   | 5.126741933 | 5.1337      | 5.0454122   |
| "Rrp36"   | 6.866662    | 7.2324257   | 6.2697988   | 6.489448    | 6.585483    | 6.9966035   | 6.8113384   | 6.4432683   |
| "Rrp7a"   | 5.748502    | 6.049321    | 5.744081    | 5.786502    | 5.3311334   | 5.893068    | 5.867845    | 5.700641    |
| "Rrp8"    | 5.649336    | 6.1431155   | 5.590128    | 5.7740164   | 5.6761494   | 5.513049    | 5.217982    | 5.7662706   |
| "Rrp9"    | 4.9036155   | 5.301785    | 4.5987616   | 4.8669744   | 5.0835648   | 4.787163    | 4.9378533   | 4.642406    |
| "Rrs1"    | 8.99094     | 9.765798    | 8.040609    | 8.1362505   | 9.300581    | 8.98885     | 8.022347    | 8.356195    |
| "Rs1"     | 2.7685614   | 3.022538    | 2.901486    | 3.099684    | 2.8914862   | 2.8535886   | 2.8721404   | 3.0152185   |
| "Rsad2"   | 6.1406576   | 4.866923433 | 4.466387867 | 4.716503933 | 5.370203167 | 5.627884533 | 5.818667567 | 6.017150367 |
| "Rsb1"    | 7.476966    | 8.523753    | 7.142169    | 7.5759115   | 8.463519    | 8.264487    | 7.1913223   | 7.8158593   |
| "Rsl1d1"  | 8.732794    | 9.04632     | 8.215364    | 8.344951    | 8.69523     | 8.94362     | 8.305699    | 8.418059    |
| "Rsl24d1" | 8.701939    | 9.29615     | 9.030109    | 9.061092    | 8.9204235   | 8.838206    | 8.762084    | 8.945158    |
| "Rsph1"   | 2.5636003   | 2.8901389   | 2.9391134   | 3.1062884   | 3.1238778   | 2.9314773   | 2.8810015   | 2.9710891   |
| "Rsph3a"  | 10.552244   | 10.371018   | 10.394647   | 10.573805   | 10.290007   | 9.783593    | 10.733367   | 10.238377   |
| "Rsph6a"  | 2.5506923   | 2.6770911   | 2.603117    | 2.743668    | 2.6104236   | 2.551143    | 2.6029863   | 2.7224524   |
| "Rspo1"   | 2.3938842   | 2.4349065   | 2.4158525   | 2.4736133   | 2.415872    | 2.3946543   | 2.4167914   | 2.4736989   |
| "Rspry1"  | 6.23865465  | 6.4698888   | 6.6046487   | 6.2936754   | 6.8682077   | 6.7884035   | 6.66581345  | 6.5170015   |
| "Rsrc1"   | 5.7445025   | 6.494014    | 6.6966915   | 6.7564855   | 6.312806    | 6.096245    | 5.900856    | 6.7834554   |
| "Rsrc2"   | 8.5665865   | 9.0542465   | 8.8377145   | 8.908734    | 8.8565555   | 9.2629635   | 8.6265735   | 9.0124065   |
| "Rsu1"    | 8.600913    | 8.437802    | 9.14371     | 8.799529    | 8.861783    | 8.740579    | 8.810176    | 8.882991    |
| "Rtbdn"   | 2.6003842   | 2.6557686   | 2.6354108   | 2.7038403   | 2.6351962   | 2.5973191   | 2.6323428   | 2.6883926   |
| "Rtcd1"   | 9.661421    | 9.1870985   | 9.150412    | 9.275078    | 8.839062    | 8.720172    | 9.227312    | 9.138031    |
| "Rtkn"    | 4.785746    | 4.829547    | 5.754214    | 5.4673786   | 4.977131    | 4.3821635   | 5.662354    | 5.756297    |
| "Rtkn2"   | 2.484771    | 2.589573    | 2.558794    | 2.6538424   | 2.5379229   | 2.463069    | 2.5060866   | 2.6316774   |
| "Rtn1"    | 2.4962296   | 2.504946    | 2.7235985   | 2.5361385   | 2.5027072   | 2.4917996   | 2.4675558   | 2.5463064   |
| "Rtn2"    | 12.258396   | 12.733605   | 12.890815   | 12.638812   | 12.52145    | 12.018564   | 12.303864   | 12.5607395  |
| "Rtn3"    | 7.47022295  | 7.5549505   | 7.3988647   | 7.167586    | 8.0683648   | 8.089195    | 7.9269623   | 7.54204425  |
| "Rtn4"    | 12.6399825  | 12.637092   | 13.272308   | 13.272507   | 12.6982315  | 12.4832145  | 13.0203675  | 13.253295   |
| "Rtn4ip1" | 3.48220375  | 3.2131008   | 3.9313571   | 4.330704    | 3.68506315  | 3.34373235  | 3.8877659   | 4.2091325   |
| "Rtp3"    | 2.249783    | 2.3293743   | 2.3147905   | 2.4316423   | 2.315161    | 2.3004813   | 2.3094711   | 2.4431024   |
| "Rtp4"    | 5.15597765  | 4.050871    | 5.0238326   | 4.96898815  | 4.8114636   | 4.7019742   | 6.00739185  | 5.2542925   |
| "Rttm"    | 2.4106772   | 2.5274422   | 2.710152    | 2.5604281   | 2.5216477   | 2.7872095   | 2.952179    | 2.5594158   |
| "Rufy1"   | 6.746544    | 7.5499167   | 7.219296    | 7.5274186   | 6.9067883   | 6.7911606   | 7.656442    | 7.078605    |
| "Rufy2"   | 3.1027957   | 3.362512    | 3.1687671   | 3.32054015  | 3.1301479   | 3.07007265  | 3.20226875  | 3.2607605   |
| "Rufy3"   | 4.3531715   | 4.307566    | 4.33140635  | 4.3396297   | 4.50116635  | 4.2709644   | 4.3335347   | 4.42241035  |
| "Runx1"   | 3.88112114  | 3.8671641   | 3.32144218  | 3.30953544  | 3.35261988  | 3.69939486  | 3.87433096  | 3.28910214  |
| "Runx1t1" | 3.69574835  | 3.9104533   | 3.7243903   | 3.8682056   | 3.7356014   | 3.516238    | 3.6799688   | 3.91348255  |
| "Runx2"   | 2.5576973   | 2.6755333   | 2.601762667 | 2.8577783   | 2.576321133 | 2.823708367 | 2.587549833 | 2.722269567 |
| "Runx3"   | 2.544189    | 2.5552492   | 2.5548444   | 2.602249    | 2.553359    | 2.539263    | 2.5486076   | 2.592948    |
| "Rusc1"   | 4.79636585  | 4.51598315  | 4.161085775 | 4.4949083   | 4.720259275 | 5.025543075 | 4.467603875 | 4.822084925 |
| "Rusc2"   | 7.45108     | 8.7335375   | 4.65076195  | 4.5495112   | 7.0115308   | 7.82607485  | 5.62402915  | 4.9718848   |
| "Ruvbl1"  | 7.415366    | 7.89953     | 7.9257708   | 8.035959    | 7.5126534   | 7.558891    | 7.4772434   | 7.64674     |
| "Ruvbl2"  | 2.8187382   | 2.996833    | 3.0309005   | 3.0917723   | 3.013016    | 2.9898925   | 3.7894895   | 3.100674    |
| "Rwdd2b"  | 3.8693774   | 3.9617016   | 4.0981765   | 4.2934847   | 3.6535578   | 3.7329276   | 3.9610188   | 4.62669     |
| "Rwdd3"   | 3.2117119   | 3.4301219   | 3.4545754   | 3.4985876   | 3.45153905  | 3.1959777   | 3.6387669   | 3.524718    |
| "Rwdd4a"  | 8.109796    | 8.2298065   | 8.3483975   | 8.6417995   | 8.3644335   | 8.069738    | 8.3774845   | 8.5296865   |
| "Rxba"    | 5.84515175  | 6.431619    | 5.99076855  | 6.11482955  | 5.9332531   | 5.90263975  | 6.18108655  | 6.10151845  |
| "Rxb"     | 8.284266    | 8.789037    | 8.078923    | 7.966808    | 8.345222    | 8.456833    | 7.9259677   | 8.083856    |
| "Rxbg"    | 6.1386433   | 7.2077007   | 8.535717    | 8.642744    | 5.93876     | 6.1985483   | 7.372661    | 8.096397    |
| "Rybp"    | 2.439638    | 2.570555    | 2.491335    | 2.5541577   | 2.4885616   | 2.4698648   | 2.4702888   | 2.5467944   |
| "Ryk"     | 7.5407293   | 8.16313665  | 8.4040905   | 8.4131965   | 7.80009935  | 7.8443587   | 8.155615    | 8.36940875  |
| "Ryr1"    | 12.794039   | 13.609894   | 13.446392   | 13.349849   | 13.14636    | 13.130462   | 12.943824   | 13.1984215  |
| "Ryr2"    | 2.5907048   | 2.621634    | 2.5859814   | 2.73143975  | 2.58189765  | 2.52984175  | 2.57561695  | 2.66387005  |
| "Ryr3"    | 2.3580587   | 2.4436598   | 2.369439    | 2.4909575   | 2.3799827   | 2.355072    | 2.4238722   | 2.4675004   |
| "S100a1"  | 7.9500552   | 7.6532985   | 7.620986    | 8.2772905   | 8.05326625  | 8.0351512   | 8.341798    | 8.23165115  |
| "S100a10" | 10.194551   | 8.5078995   | 10.5499895  | 9.468123    | 10.228904   | 10.1551675  | 10.4491905  | 9.625381    |
| "S100a13" | 8.333909    | 7.2268896   | 8.027048    | 7.1717997   | 7.9829845   | 8.335563    | 8.8650875   | 7.6369014   |
| "S100a14" | 2.220931    | 2.270309    | 2.8059902   | 2.3164585   | 2.2487082   | 2.250146    | 2.2434218   | 2.3127885   |
| "S100a16" | 9.000106    | 9.150764    | 9.752759    | 9.314237    | 9.050588    | 9.013253    | 9.422567    | 9.271276    |
| "S100a4"  | 9.816018    | 7.80569     | 10.833185   | 9.318974    | 9.046375    | 8.47043     | 9.92919     | 8.954702    |
| "S100a5"  | 2.3402603   | 2.3515465   | 2.3474576   | 2.4063513   | 2.3189025   | 2.2856922   | 2.3462284   | 2.4004838   |
| "S100a6"  | 11.065512   | 10.601957   | 11.954144   | 11.338246   | 11.462217   | 10.954994   | 11.45689    | 11.326259   |

|           |             |             |             |             |             |             |             |             |
|-----------|-------------|-------------|-------------|-------------|-------------|-------------|-------------|-------------|
| "S100a8"  | 9.951294    | 5.4268637   | 4.1567802   | 4.392473    | 3.9099324   | 10.912374   | 8.319932    | 5.9533076   |
| "S100a9"  | 10.044507   | 5.0729175   | 4.1980534   | 4.8408      | 4.8767486   | 11.215824   | 8.799356    | 6.642232    |
| "S100b"   | 3.5737548   | 3.30880455  | 3.94027115  | 3.21210445  | 4.4210191   | 2.81635805  | 3.9535799   | 3.646581    |
| "S100g"   | 2.4451447   | 2.6235552   | 2.4753199   | 2.576373    | 2.479599    | 2.4214945   | 2.4735365   | 2.5669332   |
| "S100pbp" | 5.165181    | 5.570062    | 5.2527866   | 4.5412645   | 5.8113737   | 5.8130565   | 5.482272    | 5.332286    |
| "S1pr1"   | 7.3289285   | 7.2450824   | 6.778276    | 6.6634817   | 7.4652634   | 7.9222527   | 7.0585117   | 7.003947    |
| "S1pr4"   | 3.2014544   | 2.7942631   | 2.6200798   | 2.6726732   | 2.754223    | 4.1229143   | 2.9124734   | 2.676185    |
| "S1pr5"   | 2.7740111   | 2.983552    | 2.8670826   | 3.0000217   | 2.866961    | 2.7886727   | 2.8532972   | 2.963247    |
| "Saa1"    | 14.5162125  | 2.54701505  | 8.4312495   | 2.5490546   | 2.7631073   | 2.38969925  | 2.46271165  | 4.38958395  |
| "Saa2"    | 14.581544   | 4.4698973   | 7.7313666   | 3.8762107   | 3.745225    | 3.5637093   | 3.6552062   | 4.1444316   |
| "Saa3"    | 9.958399    | 4.987681    | 5.4696937   | 4.6658773   | 4.984498    | 4.7478194   | 4.7982063   | 4.2337785   |
| "Saa4"    | 9.34074835  | 2.2945655   | 3.24848465  | 2.31135795  | 2.26081135  | 2.21218685  | 2.2473079   | 2.32451045  |
| "Saa11"   | 2.824155167 | 2.8826935   | 2.863226867 | 2.925371067 | 2.857276067 | 2.747215067 | 2.8782618   | 2.914100433 |
| "Sac3d1"  | 3.288302    | 3.538664767 | 3.696394767 | 3.793294167 | 3.591957667 | 3.299261533 | 3.637642    | 3.7180354   |
| "Sacm11"  | 9.3412285   | 8.876842    | 9.432699    | 9.556559    | 9.282132    | 9.28869     | 9.608734    | 9.43502     |
| "Sacs"    | 5.39719785  | 4.67162585  | 5.58623815  | 6.0368861   | 5.6854747   | 4.35038305  | 6.7915473   | 6.1091438   |
| "Sae1"    | 3.8606587   | 3.983531333 | 4.196271467 | 4.229195567 | 3.827339133 | 3.977516867 | 4.136895367 | 4.202777767 |
| "Safb"    | 7.939821    | 8.6897085   | 7.7269715   | 7.3908425   | 8.55489395  | 8.538902    | 7.7400438   | 7.5813395   |
| "Safb2"   | 5.449886667 | 6.208123733 | 5.4152061   | 5.3071842   | 5.720641167 | 6.002387067 | 5.454400767 | 5.405231667 |
| "Sall2"   | 2.9272616   | 3.1873322   | 3.0591683   | 3.1998632   | 3.1022615   | 3.044924    | 3.0901797   | 3.1632833   |
| "Sall4"   | 2.35164245  | 2.4205426   | 2.8409243   | 2.68844045  | 2.52981965  | 2.3318812   | 2.4134741   | 2.4867651   |
| "Samd10"  | 3.3567226   | 3.4986286   | 3.415377    | 3.5027015   | 3.4393795   | 3.37569     | 3.4146726   | 3.4736178   |
| "Samd4"   | 9.483624    | 10.395062   | 9.343647    | 9.845547    | 10.276429   | 10.044776   | 9.283537    | 9.995983    |
| "Samd4b"  | 2.327755    | 2.3643272   | 2.3455133   | 2.410218    | 2.3462265   | 2.460444    | 2.345728    | 2.397741    |
| "Samd8"   | 9.828602    | 10.1709795  | 10.663209   | 10.69729    | 10.101568   | 10.006895   | 10.391267   | 10.618898   |
| "Samhd1"  | 5.050636567 | 4.980174567 | 5.144761233 | 5.002901567 | 5.200101633 | 6.0519971   | 5.145417467 | 5.0904739   |
| "Samm50"  | 11.44134675 | 11.4264485  | 11.5695585  | 11.7252325  | 11.52806    | 11.2059625  | 11.717471   | 11.6342735  |
| "Samsn1"  | 2.302264    | 2.364944    | 2.3324065   | 2.4253628   | 2.3484228   | 2.9940112   | 2.332103    | 2.4138088   |
| "Sap30"   | 8.702948    | 8.457817    | 7.233818    | 7.2075987   | 7.641691    | 8.493026    | 7.112283    | 7.3412704   |
| "Sap30l"  | 9.1618595   | 9.254728    | 9.416197    | 9.585367    | 9.105562    | 9.108841    | 9.469262    | 9.576625    |
| "Sar1a"   | 9.310553    | 9.2307675   | 9.20401485  | 9.0771655   | 9.2806805   | 9.197328    | 9.5504675   | 9.107724    |
| "Sar1b"   | 13.390833   | 13.908279   | 13.727445   | 13.765848   | 13.751528   | 13.785206   | 13.608922   | 13.905007   |
| "Sardh"   | 4.95025415  | 2.30405425  | 2.3018206   | 2.2808986   | 2.3223014   | 2.22055335  | 2.25036945  | 2.30572865  |
| "Sarnp"   | 9.135228667 | 9.423835833 | 9.616214667 | 9.777864    | 9.280731333 | 9.342149    | 9.538232    | 9.845235667 |
| "Sars"    | 8.489635    | 8.709933    | 8.714862    | 8.6621425   | 8.6030085   | 8.5341165   | 8.6188385   | 8.580338    |
| "Sars2"   | 3.779792    | 4.0048404   | 4.903063    | 3.9921432   | 4.1204214   | 4.0598836   | 3.953691    | 3.3693478   |
| "Sart1"   | 6.830168    | 7.477742    | 6.8114505   | 6.609782    | 6.975121    | 7.2851763   | 6.9221697   | 6.778045    |
| "Sart3"   | 3.7640585   | 4.25993115  | 3.52090955  | 3.71469155  | 3.7162842   | 3.7961933   | 3.72518065  | 3.777881    |
| "Sash1"   | 9.0556755   | 8.120071    | 8.558763    | 7.9727077   | 8.668291    | 8.582891    | 8.236324    | 8.254119    |
| "Sash3"   | 2.1562073   | 2.175954    | 2.2377124   | 2.2193766   | 2.164711    | 6.1448994   | 2.6750278   | 2.222556    |
| "Sass6"   | 2.6995187   | 2.937665    | 3.0865347   | 3.455829    | 3.2432663   | 3.221814    | 3.2644901   | 3.3188593   |
| "Sat1"    | 10.255901   | 9.047735    | 9.085018    | 8.360009    | 9.737534    | 10.007364   | 9.289873    | 8.386741    |
| "Satb1"   | 8.230539333 | 8.952852    | 9.4111927   | 9.521491333 | 8.6865126   | 8.5116155   | 8.891615667 | 9.337916467 |
| "Sav1"    | 7.9824725   | 9.2846965   | 7.66062185  | 7.64947935  | 8.327331    | 9.02127635  | 7.99086935  | 7.76415125  |
| "Sbds"    | 8.9187155   | 8.961137    | 7.6924677   | 7.183423    | 8.7973995   | 9.608731    | 8.029676    | 7.7474103   |
| "Sbf2"    | 5.95829085  | 6.1190376   | 5.86627515  | 5.5811695   | 6.40820285  | 6.127959    | 5.81373355  | 5.7603423   |
| "Sbk1"    | 5.3878462   | 4.1988749   | 6.6682665   | 6.8362187   | 5.5214344   | 5.142695    | 6.311074    | 5.91416625  |
| "Sbno1"   | 6.51741725  | 6.582031525 | 6.75929255  | 7.1055182   | 6.8235535   | 7.103855325 | 6.8057425   | 7.164250075 |
| "Sbp"     | 2.7365422   | 2.9456263   | 2.8708992   | 3.001478    | 2.8835735   | 2.8215685   | 2.8688872   | 2.9643717   |
| "Sc4mol"  | 9.557418    | 5.090132    | 6.124426    | 4.6056685   | 4.843695    | 4.9373055   | 5.931815    | 5.347134    |
| "Sc5d"    | 8.244295    | 7.061632    | 7.3891563   | 7.2074447   | 7.3331585   | 6.956859    | 7.659255    | 7.205075    |
| "Scaf11"  | 6.8199935   | 7.690899975 | 6.46757775  | 6.51803205  | 7.18526005  | 7.379152975 | 6.622355425 | 6.59851165  |
| "Scaf4"   | 6.24331545  | 6.86561625  | 6.5972656   | 6.726962    | 6.731645    | 7.07614205  | 6.717699    | 6.63427925  |
| "Scaf8"   | 7.2464977   | 8.09737775  | 6.50720385  | 6.6170382   | 7.33401065  | 7.740969    | 6.72507305  | 6.6740985   |
| "Scamp1"  | 8.667603    | 8.751917    | 8.767131    | 8.591025    | 8.852086    | 8.770834    | 8.482682    | 8.5194235   |
| "Scamp2"  | 7.2874795   | 7.4254425   | 7.553215    | 7.15163885  | 6.934861    | 7.175862    | 7.28499375  | 7.0854282   |
| "Scamp3"  | 6.8501015   | 6.895756    | 7.165912    | 7.031133    | 7.0106854   | 6.7402024   | 7.105263    | 7.0167165   |
| "Scamp4"  | 4.545314    | 4.9805083   | 4.8627563   | 4.400078    | 4.530218    | 4.7285967   | 4.63491     | 4.60726     |
| "Scamp5"  | 2.4642763   | 2.4755182   | 2.470386    | 2.5251012   | 2.4704728   | 2.4498456   | 2.4697723   | 2.6522505   |
| "Scand1"  | 8.391524    | 8.764122    | 8.306432    | 8.429883    | 8.421134    | 8.21635     | 8.648019    | 8.242779    |
| "Scap"    | 8.047388    | 7.2004547   | 7.3791575   | 7.4172926   | 7.364133    | 7.330991    | 7.4848733   | 7.338936    |
| "Scara3"  | 4.174369    | 4.3915944   | 7.274935    | 6.2744994   | 6.0512323   | 4.816186    | 5.856172    | 6.6955514   |
| "Scara5"  | 9.528156    | 8.619221    | 9.005515    | 8.495291    | 9.728086    | 10.364495   | 7.991083    | 8.752103    |
| "Scarb1"  | 6.630959567 | 5.652023167 | 5.8384662   | 5.887505633 | 6.727771633 | 6.070871667 | 6.0760722   | 5.791082333 |
| "Scarb2"  | 10.277156   | 9.654869    | 9.7852375   | 9.6954605   | 10.086084   | 9.8405065   | 10.1698115  | 9.6667695   |
| "Sccpdh"  | 4.34454775  | 5.25480615  | 5.10747675  | 5.12295725  | 4.9848696   | 5.060437    | 5.26665745  | 5.0966317   |
| "Scd1"    | 7.51499165  | 7.2931855   | 8.85234685  | 6.4951129   | 9.6858005   | 8.5977378   | 9.6879773   | 7.6167319   |
| "Scd2"    | 8.964569    | 7.8459077   | 9.544033    | 8.724026    | 9.386363    | 8.127341    | 10.288203   | 8.907391    |
| "Scd3"    | 2.6436062   | 2.8014593   | 2.94655     | 2.7984571   | 2.710228    | 2.6665874   | 2.7016797   | 2.7650404   |
| "Scel"    | 3.0836947   | 3.1543932   | 5.5037184   | 3.2282813   | 3.0526729   | 2.9610133   | 3.0219722   | 3.1562657   |
| "Scfd1"   | 4.9779782   | 5.13851765  | 5.0640991   | 4.95299125  | 4.9770367   | 4.9467294   | 4.90265675  | 5.0459437   |
| "Scg2"    | 2.3706667   | 2.4836876   | 2.4365942   | 2.6072598   | 2.4378698   | 2.4050598   | 2.4379337   | 2.5328906   |
| "Scg3"    | 3.823289    | 3.6553648   | 5.4517508   | 3.7155504   | 4.6198792   | 3.5809379   | 3.6140018   | 3.849335    |
| "Scg5"    | 2.6625016   | 2.8442907   | 2.6974425   | 2.80902     | 2.699019    | 2.6414957   | 2.6891136   | 2.786137    |
| "Scgb1a1" | 2.3757966   | 2.4639807   | 2.4231858   | 2.502958    | 2.4239268   | 2.3787785   | 2.4189944   | 2.4998886   |
| "Scgn"    | 2.1710248   | 2.229486    | 2.1997595   | 2.2637403   | 2.3533797   | 2.1763766   | 2.1970165   | 2.244152    |
| "Scin"    | 3.8251019   | 5.902978    | 5.8558283   | 5.73057     | 4.113636    | 4.6249175   | 4.0056252   | 4.8919196   |
| "Schy"    | 2.565435    | 2.5877788   | 2.5611048   | 2.630871    | 2.5571392   | 2.5587325   | 2.560793    | 2.596894    |
| "Scmh1"   | 5.098233    | 6.4418163   | 6.0342155   | 6.1657815   | 5.936028    | 5.7615423   | 5.9877844   | 6.265455    |
| "Scml4"   | 2.4542205   | 2.5606468   | 2.4858055   | 2.5843775   | 2.4957747   | 2.4633725   | 2.482793    | 2.5579703   |
| "Scn10a"  | 2.433551    | 2.5042992   | 2.4432197   | 2.5564568   | 2.449944    | 2.4005628   | 2.4397395   | 2.5719757   |

|             |             |             |             |             |             |             |             |             |
|-------------|-------------|-------------|-------------|-------------|-------------|-------------|-------------|-------------|
| "Scn1a"     | 2.8389208   | 3.0576878   | 2.9121587   | 3.1107872   | 2.922466    | 2.9026597   | 2.9089768   | 3.0443876   |
| "Scn1b"     | 7.2625303   | 7.7912197   | 8.269526    | 8.424448    | 7.6768265   | 7.1324873   | 7.761905    | 8.26549     |
| "Scn2a1"    | 2.44597415  | 2.5612492   | 2.5179264   | 2.61936315  | 2.51974185  | 2.4553685   | 2.51062275  | 2.60678145  |
| "Scn3a"     | 2.4006293   | 2.4869347   | 2.4437423   | 2.5619597   | 2.44902     | 2.396335    | 2.4433408   | 2.5311022   |
| "Scn3b"     | 4.814913    | 5.29942     | 5.310045    | 3.8510258   | 4.1293697   | 3.796043    | 4.5581274   | 3.8936992   |
| "Scn4a"     | 6.056965    | 6.474727    | 6.7408013   | 6.898555    | 6.7229137   | 4.970307    | 6.9794974   | 6.8359394   |
| "Scn7a"     | 4.1426497   | 4.6365547   | 4.302683    | 4.436129    | 5.44416     | 4.824244    | 5.289006    | 4.5023956   |
| "Scn8a"     | 2.444472    | 2.4914746   | 2.4927478   | 2.6396873   | 2.491672    | 2.4752958   | 2.4861314   | 2.5813355   |
| "Scnm1"     | 7.6106634   | 7.496901    | 7.5041447   | 7.406889    | 7.369575    | 6.9794974   | 8.114808    | 7.3756824   |
| "Scnm1b"    | 2.3469114   | 2.4275193   | 2.375996    | 2.4668365   | 2.3776765   | 2.3349023   | 2.3754008   | 2.4694717   |
| "Sco2"      | 7.498459    | 6.090907    | 5.6389256   | 5.76876     | 6.0126567   | 5.764716    | 5.560314    | 5.7697005   |
| "Scoc"      | 8.234034    | 8.322544    | 9.0421195   | 9.385226    | 8.516806    | 8.07671525  | 8.9792715   | 9.2015485   |
| "Scp2"      | 10.19839833 | 9.574091267 | 9.798587333 | 9.990276433 | 10.0807419  | 10.02957747 | 9.941441667 | 10.11967947 |
| "Scpep1"    | 6.2833695   | 5.0680492   | 6.4436152   | 6.314842    | 6.5622345   | 6.6082975   | 6.2336242   | 6.4178785   |
| "Scrg1"     | 3.045152    | 3.3615701   | 3.0955815   | 3.1544945   | 3.115711    | 3.0534883   | 3.085447    | 3.1578965   |
| "Scrib"     | 5.4841247   | 5.637125    | 5.720388    | 5.6313      | 5.4247227   | 5.557804    | 5.600705    | 5.674643    |
| "Scrn2"     | 3.1251069   | 3.48086155  | 3.6378387   | 3.57550675  | 3.20591235  | 3.1061927   | 3.4301025   | 3.2651382   |
| "Scrn3"     | 7.021518367 | 7.643377667 | 7.534831667 | 7.6549412   | 7.369551667 | 7.403719267 | 6.843711133 | 7.738333867 |
| "Scube2"    | 4.1855383   | 3.1659033   | 5.5440235   | 4.9687576   | 4.35265     | 3.0260894   | 4.424105    | 4.6573286   |
| "Scx"       | 4.256162    | 4.2818      | 4.575199    | 4.437661    | 3.7265828   | 4.201225    | 4.276171    | 4.3413076   |
| "Scyl1"     | 8.146533433 | 8.593638167 | 8.2729733   | 8.665276367 | 8.2903958   | 8.2515508   | 8.281523667 | 8.5626036   |
| "Sdad1"     | 7.42657     | 7.713128    | 7.106586    | 6.9759884   | 6.9895105   | 7.2136774   | 7.029315    | 7.1159515   |
| "Sdc1"      | 5.59986075  | 3.141881175 | 4.1193246   | 3.5676786   | 3.42473865  | 3.3626568   | 3.233826975 | 3.640690275 |
| "Sdc2"      | 7.611848367 | 6.310170833 | 7.505346833 | 6.6013855   | 6.9378115   | 6.837295867 | 7.185231667 | 6.787805433 |
| "Sdc3"      | 4.019734    | 3.4508071   | 3.44000135  | 3.293666    | 3.4192542   | 3.2671694   | 3.691246    | 3.151163    |
| "Sdc4"      | 10.915451   | 9.94335     | 7.68335235  | 6.81198475  | 8.77726165  | 9.9940145   | 7.66781325  | 7.00064     |
| "Sdcbp"     | 8.11590035  | 7.086656    | 7.61798435  | 7.6876343   | 8.0058325   | 8.709833    | 8.14128775  | 7.90710865  |
| "Sdcbp2"    | 2.553302    | 2.6098952   | 2.5746193   | 2.6384032   | 2.574369    | 2.841415    | 2.4811513   | 2.6398551   |
| "Sdccag3"   | 4.3989008   | 4.5289649   | 4.432380825 | 4.49337555  | 4.39855145  | 4.5398128   | 4.497832275 | 4.472927825 |
| "Sdccag8"   | 2.9689179   | 3.7457744   | 3.29945745  | 3.9638939   | 3.13832185  | 3.13373935  | 3.23490145  | 3.36669655  |
| "Sdf2"      | 10.338323   | 10.416839   | 10.52438    | 10.296161   | 10.3303995  | 10.474216   | 10.235369   | 10.218651   |
| "Sdf211"    | 5.5464745   | 4.376468    | 4.983067    | 4.42995     | 4.32418     | 4.6267705   | 5.7749615   | 4.458985    |
| "Sdf4"      | 7.1998777   | 7.6452178   | 7.5008075   | 7.486833    | 7.5470095   | 7.5692182   | 7.634891    | 7.70707225  |
| "Sdha"      | 11.8127235  | 11.9668545  | 12.2333015  | 12.3676615  | 12.3600715  | 12.1571885  | 11.9841055  | 12.4146045  |
| "Sdhaf1"    | 6.6789103   | 6.39052     | 7.0983257   | 7.3698196   | 6.666992    | 6.1894226   | 6.76726036  | 6.775542    |
| "Sdhaf2"    | 8.03318135  | 7.9637282   | 8.12803     | 8.3474845   | 8.25675865  | 7.923028    | 8.20669     | 8.4905955   |
| "Sdhb"      | 13.263826   | 12.874666   | 13.605266   | 13.535768   | 13.634526   | 13.13098    | 13.397467   | 13.74489    |
| "Sdhc"      | 9.127035    | 9.03631385  | 9.5721725   | 9.66658     | 9.442001    | 9.1701495   | 9.328335    | 9.7144565   |
| "Sdhd"      | 9.637816    | 9.5432945   | 9.9670115   | 10.180712   | 9.9259035   | 9.37520125  | 9.767944    | 10.1853995  |
| "Sdpr"      | 8.9314595   | 8.7639655   | 9.5074695   | 9.5605505   | 9.953207    | 10.86556925 | 9.9698505   | 10.0040735  |
| "Sdr42e1"   | 3.7420635   | 2.4424145   | 2.4094446   | 2.4473443   | 2.434913    | 2.4245365   | 2.3819897   | 2.4621558   |
| "Sds"       | 9.59369     | 2.8779008   | 2.903238    | 2.9050312   | 2.8683383   | 2.827839    | 2.8222578   | 2.9068651   |
| "Sds1"      | 3.8331017   | 1.8922501   | 1.8735077   | 1.9144509   | 1.8742237   | 1.8552548   | 1.8734248   | 1.9143516   |
| "Sec11a"    | 9.472837    | 9.180653    | 9.272907    | 8.828765    | 9.195791    | 9.568735    | 9.204487    | 8.95236     |
| "Sec11c"    | 8.278612    | 8.243974    | 8.732017    | 9.21541     | 8.475812    | 8.264789    | 9.147837    | 8.957242    |
| "Sec13"     | 9.64403     | 9.917938    | 10.018569   | 9.840331    | 9.586934    | 9.559082    | 9.7791      | 9.756336    |
| "Sec1411"   | 5.45379665  | 5.6185388   | 5.961933    | 5.65224835  | 5.2144581   | 5.4657425   | 6.3416227   | 5.58926485  |
| "Sec1412"   | 4.13805     | 2.4798746   | 2.4762087   | 2.5228333   | 2.4750462   | 2.4598556   | 2.47272     | 2.5215743   |
| "Sec1414"   | 7.497799    | 3.1477542   | 3.264683    | 2.7623951   | 2.6765635   | 3.1815288   | 2.6290789   | 2.3500345   |
| "Sec16a"    | 7.58906275  | 7.850333    | 7.3793633   | 7.00420025  | 7.6928783   | 7.91221875  | 7.1160645   | 7.1133151   |
| "Sec16b"    | 4.024876    | 2.0991788   | 3.2460158   | 3.1031575   | 3.4554667   | 2.3352642   | 3.0139685   | 3.2854283   |
| "Sec22a"    | 5.092284    | 5.5498214   | 5.9311614   | 5.863723    | 5.816273    | 5.1838393   | 5.4665747   | 5.8834867   |
| "Sec22b"    | 7.16326835  | 7.02548715  | 7.74525325  | 7.3020287   | 7.2578484   | 7.2178353   | 7.6742705   | 7.36032235  |
| "Sec23a"    | 9.815824    | 9.988731    | 10.672924   | 10.582619   | 10.257807   | 9.980083    | 10.247744   | 10.788385   |
| "Sec23b"    | 6.3446593   | 6.1151967   | 6.870433    | 6.6449695   | 6.5122123   | 6.381451    | 6.737488    | 6.2987003   |
| "Sec23ip"   | 7.810661    | 9.067921    | 7.3873057   | 7.3824983   | 8.447746    | 9.052725    | 7.382639    | 7.480674    |
| "Sec24b"    | 6.3903413   | 6.5032673   | 5.8085556   | 5.835122    | 6.512195    | 6.9518223   | 6.3747683   | 5.807037    |
| "Sec24c"    | 8.56905     | 8.551249    | 8.899205    | 8.701889    | 8.765624    | 8.645749    | 8.828804    | 8.646379    |
| "Sec24d"    | 5.3375325   | 3.1423473   | 5.9697137   | 4.5932226   | 4.7995324   | 5.185053    | 4.6370115   | 4.942022    |
| "Sec31a"    | 7.3878875   | 7.8340573   | 7.7297635   | 7.4583883   | 7.4092016   | 7.6952252   | 7.458477    | 7.3891773   |
| "Sec61a1"   | 5.3519179   | 4.85498115  | 5.199064433 | 4.484508633 | 5.1227518   | 5.479677283 | 5.19779525  | 5.0142179   |
| "Sec61a2"   | 6.025676    | 6.49564     | 6.99779865  | 7.098384    | 6.6522628   | 6.30386115  | 6.284294    | 7.1962955   |
| "Sec61b"    | 5.920974    | 6.2482156   | 6.68587765  | 6.6061271   | 6.3562413   | 6.241177    | 6.4640303   | 6.235136    |
| "Sec62"     | 9.355200333 | 9.8136349   | 9.236076833 | 9.056854667 | 9.479978533 | 9.717887767 | 9.045374667 | 9.2252738   |
| "Sec63"     | 7.4009857   | 7.062099275 | 7.0637804   | 6.920076675 | 7.326958775 | 7.197414725 | 7.73780265  | 7.198824825 |
| "Secisbp2l" | 7.21953235  | 7.01459335  | 7.42744725  | 7.12578775  | 7.853269    | 6.96153525  | 7.613491    | 7.2292075   |
| "Seh1l"     | 4.97037378  | 5.2416107   | 4.90175684  | 5.18190786  | 4.91335062  | 4.87464934  | 4.96566896  | 5.01265132  |
| "Sel1l"     | 3.810132125 | 4.088729275 | 4.008104225 | 3.87113935  | 4.0816995   | 3.882614275 | 3.824917625 | 3.89438265  |
| "Sel1l3"    | 7.517741    | 7.951297    | 8.51965     | 8.325226    | 6.7963424   | 6.340561    | 8.307714    | 8.465648    |
| "Sele"      | 2.3733745   | 2.4987903   | 2.4187376   | 2.526917    | 2.4203331   | 2.3861537   | 2.416539    | 2.5129917   |
| "Selenbp1"  | 9.852638    | 7.743997    | 8.338376    | 7.49480715  | 9.1329845   | 8.7565795   | 8.8100395   | 8.128934    |
| "Selk"      | 10.563862   | 10.785174   | 10.622406   | 10.543046   | 10.619347   | 10.571044   | 10.727195   | 10.643812   |
| "Sell"      | 2.07518075  | 2.0877591   | 2.0437572   | 2.1281218   | 2.08562255  | 5.78826715  | 2.0419105   | 2.12941985  |
| "Selm"      | 5.7428327   | 5.6737022   | 7.056028    | 6.353338    | 6.217955    | 5.3990693   | 6.845874    | 6.5182476   |
| "Selp"      | 2.75651885  | 3.06714685  | 3.4346695   | 3.44807225  | 3.24594665  | 3.1619811   | 3.76127435  | 3.34326075  |
| "Selplg"    | 3.2835906   | 3.2650037   | 3.2150745   | 3.0006423   | 3.2881508   | 5.531587    | 3.90702     | 3.3145044   |
| "Sema3a"    | 2.727847267 | 2.955568067 | 3.4788942   | 3.068625833 | 2.918870733 | 2.8302588   | 2.931532933 | 3.0350102   |
| "Sema3b"    | 3.88047995  | 3.63349125  | 4.48841405  | 4.0324511   | 4.2545075   | 3.70782935  | 4.24467405  | 4.442466    |
| "Sema3c"    | 4.3115835   | 5.5217834   | 4.7175474   | 3.7331972   | 4.3026924   | 4.726072    | 3.5475328   | 4.0713964   |
| "Sema3e"    | 2.537047067 | 2.6473864   | 2.605751733 | 2.7124095   | 2.648634567 | 2.5835487   | 2.607185367 | 2.695190133 |
| "Sema3f"    | 2.3846204   | 2.4001346   | 2.401297    | 2.6673295   | 2.3933573   | 2.3715663   | 2.3929675   | 2.436197    |

|             |             |             |             |             |             |             |             |             |
|-------------|-------------|-------------|-------------|-------------|-------------|-------------|-------------|-------------|
| "Sema4a"    | 5.247768    | 4.57401685  | 4.9669659   | 4.6398187   | 4.86701085  | 6.1998998   | 5.5388235   | 4.95778535  |
| "Sema4b"    | 3.1064613   | 3.1366978   | 3.1026404   | 3.1909313   | 3.213358    | 3.1833084   | 3.2111092   | 3.1960552   |
| "Sema4d"    | 2.1796677   | 2.183707    | 2.1580994   | 2.2080126   | 2.148373    | 4.3548384   | 2.1741865   | 2.209198    |
| "Sema4g"    | 2.9779887   | 2.1790047   | 2.1519232   | 2.206382    | 2.1486948   | 2.125362    | 2.1389828   | 2.2176316   |
| "Sema5a"    | 2.7389321   | 3.1533362   | 3.1986602   | 3.2043941   | 3.1935275   | 3.59489225  | 3.05902755  | 3.17425885  |
| "Sema5b"    | 2.4670703   | 2.561959    | 2.5081143   | 2.6227698   | 2.5112731   | 2.4770586   | 2.5082958   | 2.5717041   |
| "Sema6a"    | 2.6359413   | 2.829637    | 2.787977    | 2.8871055   | 2.7896826   | 2.7546604   | 2.7907116   | 2.8601933   |
| "Sema6c"    | 1.84029635  | 1.87871575  | 2.39229645  | 2.204975    | 1.8435176   | 1.8343946   | 1.85257495  | 1.92685695  |
| "Sema6d"    | 2.3686237   | 2.4748766   | 2.4151356   | 2.5011692   | 2.4122047   | 2.366829    | 2.4099014   | 2.491634    |
| "Sema7a"    | 4.0405919   | 4.4367085   | 3.76132395  | 4.2044487   | 4.19529095  | 4.32447925  | 4.13161975  | 3.9675561   |
| "Senp1"     | 3.349386    | 3.9243931   | 3.40010785  | 3.5991036   | 3.5957643   | 3.6535065   | 3.4792152   | 3.3386227   |
| "Senp2"     | 6.3399728   | 6.496635    | 6.284061    | 6.464745333 | 6.2136785   | 6.375057367 | 6.452314133 | 6.614800033 |
| "Senp3"     | 7.9637465   | 8.397326    | 7.5466723   | 7.5992813   | 7.8238587   | 8.005499    | 7.620935    | 7.438666    |
| "Senp6"     | 5.71548065  | 7.022058    | 6.0885025   | 6.3991015   | 6.13917865  | 6.11382775  | 5.89491125  | 6.1715601   |
| "Seph1"     | 2.518314    | 2.6226315   | 2.5892928   | 2.669919    | 2.575963    | 2.5124364   | 2.591451    | 2.673626    |
| "Seph2"     | 9.605685    | 8.0950031   | 7.876131133 | 8.0617895   | 8.198097    | 8.760107833 | 7.860807    | 7.962158    |
| "Sepn1"     | 3.2034497   | 3.217792    | 3.1794045   | 3.3432987   | 3.0577512   | 3.3333027   | 3.1008878   | 3.7356317   |
| "Sepp1"     | 13.790399   | 12.13316    | 12.567408   | 11.782427   | 13.037704   | 13.562722   | 12.561182   | 12.248973   |
| "Sepsecs"   | 2.1859748   | 2.159605    | 2.1521044   | 2.3181417   | 2.2411187   | 2.4159153   | 2.4092746   | 2.317683    |
| "Sept1"     | 2.3983319   | 3.122619    | 2.421674    | 2.4881124   | 2.4286885   | 2.4774845   | 2.4599268   | 2.4892464   |
| "Sept10"    | 6.5465865   | 5.6583614   | 6.9925275   | 6.5138507   | 6.85745     | 6.435135    | 7.5729012   | 7.063695    |
| "Sept11"    | 7.1160035   | 7.3493648   | 7.7368193   | 7.3187857   | 7.189837    | 6.8735905   | 7.9699      | 7.7526083   |
| "Sepw1"     | 9.85735235  | 10.44666525 | 10.6894225  | 10.685735   | 10.0657992  | 9.9694905   | 10.496478   | 10.5135225  |
| "Sepx1"     | 9.132747    | 9.780364    | 8.954979    | 9.965762    | 9.536136    | 9.539747    | 9.185055    | 9.456635    |
| "Serac1"    | 3.9429885   | 3.8363508   | 4.2420582   | 4.38593625  | 3.85184585  | 3.759385    | 4.0782788   | 4.52574965  |
| "Serbp1"    | 8.73530714  | 9.5186384   | 9.87450444  | 9.86168372  | 9.23464404  | 8.88447606  | 9.5640986   | 9.79973608  |
| "Serf1"     | 3.8921879   | 3.9331253   | 3.98775175  | 4.0842954   | 3.78608335  | 3.527399125 | 4.2499721   | 4.016103725 |
| "Serf2"     | 11.1158802  | 10.7633501  | 11.4365374  | 11.319723   | 11.0587217  | 10.917195   | 11.1745716  | 11.3058708  |
| "Sergef"    | 2.95812     | 2.8858032   | 2.8909817   | 2.780056    | 2.584192    | 2.462413    | 3.199665    | 2.9793668   |
| "Serhl"     | 6.93943225  | 7.060752    | 7.277998    | 7.7680492   | 7.32731845  | 7.0553312   | 7.5428588   | 7.5757075   |
| "Serinc1"   | 9.85833275  | 9.88352055  | 9.424434325 | 9.34050915  | 9.726004    | 9.896832175 | 9.51205175  | 9.515497    |
| "Serinc3"   | 8.2124529   | 8.61111416  | 7.63920748  | 8.04048656  | 8.2165242   | 9.0808658   | 7.88767656  | 8.15546052  |
| "Serinc4"   | 2.5168017   | 2.61933685  | 2.83312415  | 2.67377065  | 2.59676145  | 2.49812995  | 2.57779665  | 2.7622266   |
| "Serp1"     | 7.89360365  | 6.08326365  | 7.24559925  | 6.467333    | 7.1323418   | 7.9966695   | 7.64621165  | 6.5641748   |
| "Serpina10" | 10.948319   | 2.150972    | 2.1440778   | 2.211531    | 2.1327782   | 2.1312172   | 2.1307764   | 2.2006803   |
| "Serpina12" | 6.592496    | 2.3540177   | 3.159052    | 2.2909431   | 2.221239    | 2.1759398   | 2.2071385   | 2.2991605   |
| "Serpina1a" | 13.308547   | 2.9127288   | 7.040922    | 2.97754     | 6.477963    | 2.7009883   | 3.032142    | 7.1941104   |
| "Serpina1b" | 13.20972125 | 1.99663895  | 7.30164315  | 2.0336627   | 6.94092125  | 2.53865135  | 1.9592054   | 6.48034215  |
| "Serpina1c" | 13.873818   | 1.494161    | 8.630851    | 1.5619386   | 7.912987    | 1.5066366   | 1.5185585   | 7.9809318   |
| "Serpina3c" | 2.7214878   | 3.0811837   | 4.266427    | 2.8475368   | 6.06783     | 5.156295    | 4.5338244   | 3.1851087   |
| "Serpina3g" | 2.4207451   | 2.10091     | 2.0713165   | 2.1533804   | 2.0746033   | 5.628723    | 2.0733762   | 2.1501596   |
| "Serpina3k" | 14.615722   | 5.541503    | 7.6425514   | 2.7430341   | 8.397518    | 3.7121775   | 2.734698    | 7.6252418   |
| "Serpina3m" | 10.426753   | 2.4121237   | 3.0629053   | 2.4288614   | 2.4414933   | 2.1428933   | 2.3943841   | 2.4397602   |
| "Serpina3n" | 10.169079   | 4.3960834   | 4.198843    | 3.4472718   | 5.288792    | 6.175949    | 4.2172065   | 3.4480371   |
| "Serpina5"  | 2.7402084   | 2.8754284   | 2.798045    | 2.9364483   | 2.805168    | 2.7457407   | 2.7929463   | 2.8387213   |
| "Serpina6"  | 4.401085    | 2.2277665   | 2.1936133   | 2.2756624   | 2.216061    | 2.1583006   | 2.188193    | 2.2723262   |
| "Serpina1a" | 4.3518926   | 3.62525725  | 5.0047972   | 4.79511935  | 4.2418388   | 4.97653915  | 5.8913357   | 4.69617715  |
| "Serpina1b" | 2.433504    | 2.5264487   | 2.4837654   | 2.603659    | 2.483236    | 2.437152    | 2.477402    | 2.588806    |
| "Serpina2"  | 2.3248842   | 2.3629048   | 3.0346186   | 2.4200273   | 2.3216171   | 2.286792    | 2.3131053   | 2.4069161   |
| "Serpina3b" | 2.97979725  | 3.2294804   | 3.2217723   | 3.29253475  | 3.09339765  | 3.0098212   | 3.0600691   | 3.204332    |
| "Serpina5"  | 2.3203555   | 2.30821095  | 3.3712626   | 2.3473055   | 2.268807    | 2.235936    | 2.26796615  | 2.34326615  |
| "Serpina6a" | 11.675175   | 12.223334   | 11.777826   | 12.127977   | 11.516179   | 12.203776   | 11.876584   | 11.201228   |
| "Serpina6b" | 2.6057856   | 2.7538867   | 3.1674843   | 2.827582    | 2.7109797   | 3.7799866   | 2.7483804   | 2.803031    |
| "Serpina7"  | 2.0981243   | 2.1136334   | 2.718481    | 2.163116    | 2.0842953   | 2.0461683   | 2.070646    | 2.1578948   |
| "Serpina8"  | 2.8802748   | 2.8618674   | 2.8340878   | 3.0021808   | 2.811989    | 2.7789102   | 2.8472447   | 2.9103281   |
| "Serpina9"  | 3.3256984   | 2.6475458   | 3.8409333   | 3.609897    | 3.559743    | 4.355589    | 4.5556355   | 3.5064049   |
| "Serpina9c" | 2.54693105  | 2.62549435  | 2.59637475  | 2.6855847   | 2.6000027   | 2.5492771   | 2.58927725  | 2.6724269   |
| "Serpina9e" | 2.371316    | 2.5967746   | 2.438945    | 2.5137033   | 2.441829    | 2.41922     | 2.4364288   | 2.5128715   |
| "Serpina1c" | 11.89003    | 2.783966    | 5.8986974   | 2.82971     | 5.5519695   | 2.747592    | 2.7455564   | 3.3218281   |
| "Serpina1d" | 8.927238    | 3.398284    | 3.875277    | 3.465589    | 3.3376446   | 3.2208083   | 3.3098083   | 3.4434302   |
| "Serpina1e" | 3.752772    | 4.1003776   | 4.140046    | 4.1808615   | 7.492902    | 4.4906383   | 4.18536     | 4.18675     |
| "Serpina2"  | 9.36949     | 9.970268    | 11.065193   | 11.011583   | 10.357748   | 10.196767   | 10.424856   | 10.712634   |
| "Serpina1f" | 9.273285    | 7.0763122   | 10.37901    | 9.19415675  | 9.150858    | 8.70983765  | 8.4589665   | 9.6459525   |
| "Serpina2f" | 8.121497    | 3.3240085   | 3.0564275   | 2.927443    | 2.8903053   | 2.6447482   | 2.8139033   | 2.9120188   |
| "Serpina1g" | 11.192706   | 9.430808    | 10.799578   | 10.121559   | 10.644157   | 10.83411    | 10.60339    | 10.266989   |
| "Serpina1h" | 7.73853235  | 5.8845435   | 9.9264615   | 8.982085    | 8.016231    | 7.3696745   | 9.284176    | 9.0522545   |
| "Serpina1i" | 2.78709265  | 2.7994806   | 3.2298419   | 2.96368325  | 2.84158505  | 2.82331255  | 2.92843565  | 3.2823729   |
| "Serpina1j" | 2.4419768   | 2.5363693   | 2.5021677   | 2.5841107   | 2.5571892   | 2.4355953   | 2.4796872   | 2.5635896   |
| "Sertad1"   | 6.6046658   | 7.1801853   | 7.6947403   | 7.356244    | 7.1952896   | 7.3149757   | 7.8278613   | 7.1707854   |
| "Sertad2"   | 8.18558885  | 9.4866255   | 6.870873    | 7.40873     | 7.8341773   | 9.026161    | 7.0667645   | 7.0858028   |
| "Sertad3"   | 4.163964    | 3.7665672   | 4.5167875   | 4.794146    | 4.5349407   | 5.0108366   | 4.667644    | 4.253566    |
| "Sesn1"     | 12.20380733 | 12.60589567 | 8.985380333 | 8.075812667 | 11.99393233 | 12.31404083 | 9.168030667 | 9.284203667 |
| "Sesn2"     | 2.87354615  | 3.11241265  | 2.8488208   | 2.94021965  | 2.8500399   | 3.5165611   | 2.8495831   | 2.9256155   |
| "Sesn3"     | 7.2320733   | 6.4201913   | 7.536747    | 7.078999    | 7.252571    | 6.86316     | 7.7823176   | 7.2463574   |
| "Set"       | 9.471223333 | 9.728564333 | 9.7213325   | 9.855475    | 9.457464333 | 9.548462333 | 9.953177667 | 9.826042    |
| "Setd1a"    | 4.055841    | 4.6371536   | 4.03450445  | 4.0322337   | 4.2610517   | 4.3301785   | 3.99529665  | 4.1326338   |
| "Setd3"     | 9.303009    | 9.958902    | 9.666768    | 9.72644     | 9.533008    | 9.436585    | 9.613088    | 9.703623    |
| "Setd4"     | 3.33890735  | 3.36020365  | 3.37278085  | 3.49101235  | 3.3284948   | 3.451438    | 3.29295385  | 3.4492703   |
| "Setd6"     | 6.56454635  | 6.89373135  | 6.580224    | 6.6550815   | 6.35445615  | 6.37282495  | 6.68609145  | 6.84839415  |
| "Setd8"     | 8.9716505   | 9.453402    | 11.304918   | 11.5510085  | 9.5763285   | 8.8997985   | 9.8775505   | 11.241766   |
| "Setdb1"    | 4.3955346   | 4.80528615  | 4.49643035  | 4.66096285  | 4.65969525  | 4.6143093   | 4.52550365  | 4.70700265  |

|            |             |             |             |             |             |             |             |             |
|------------|-------------|-------------|-------------|-------------|-------------|-------------|-------------|-------------|
| "Sez6"     | 2.6301873   | 2.8240058   | 2.760372    | 2.809073    | 2.7589757   | 2.6747642   | 2.7475767   | 2.8412936   |
| "Sez6l2"   | 2.5536432   | 2.6552968   | 2.572116    | 2.64855     | 2.5730615   | 2.5506027   | 2.534629    | 2.6374831   |
| "Sf1"      | 5.473875    | 5.6837028   | 4.732036733 | 4.862472267 | 4.934185233 | 5.2640235   | 4.704233167 | 4.728567433 |
| "Sf3a1"    | 3.8774536   | 4.0703851   | 4.19692015  | 4.0178802   | 3.6317284   | 3.7873908   | 3.8974873   | 4.0447347   |
| "Sf3a2"    | 4.8985762   | 5.5035391   | 5.23998575  | 5.2356061   | 5.3402262   | 5.3244866   | 5.1848617   | 5.208425    |
| "Sf3a3"    | 5.80010335  | 6.2607568   | 5.53055     | 5.79397815  | 5.74639245  | 6.25134265  | 5.782152    | 5.6554205   |
| "Sf3b1"    | 9.254420667 | 10.11601567 | 8.839977333 | 8.786721    | 9.480565333 | 10.4845892  | 8.520259667 | 8.94507     |
| "Sf3b2"    | 7.81090285  | 8.1559884   | 7.624309175 | 7.8815754   | 7.9859365   | 7.78886125  | 7.786364125 | 8.071825125 |
| "Sf3b3"    | 7.5377107   | 7.6846476   | 7.0458174   | 6.4368715   | 7.566832    | 7.835695    | 7.1165047   | 6.9283752   |
| "Sf3b4"    | 6.361554    | 7.3023467   | 6.282874    | 6.279513    | 6.5817      | 6.705382    | 6.297904    | 6.219812    |
| "Sf3b5"    | 6.3872841   | 6.75640145  | 6.52441475  | 6.590043    | 6.4945483   | 6.3607232   | 6.47460095  | 6.51514135  |
| "Sfmbt1"   | 2.67837455  | 2.8431167   | 2.6942551   | 2.91487725  | 2.99389335  | 2.70446325  | 2.55963675  | 2.764786    |
| "Sfn"      | 2.3824      | 2.4552417   | 2.412306    | 2.5115612   | 2.4153054   | 2.379966    | 2.4122727   | 2.5392256   |
| "Sfpq"     | 8.096818    | 8.7136425   | 7.8479666   | 7.7789616   | 7.88843876  | 8.613651    | 7.83498836  | 7.80695748  |
| "Sfr1"     | 10.744086   | 10.9246025  | 10.969453   | 11.067894   | 11.024856   | 10.846884   | 11.051961   | 11.168215   |
| "Sfrp1"    | 2.686185125 | 2.870043775 | 2.9349742   | 2.921991775 | 2.79707825  | 2.72299725  | 2.7972999   | 2.907961625 |
| "Sfrp2"    | 2.4958942   | 2.6105967   | 6.566286    | 3.5807748   | 4.7252617   | 3.0881996   | 4.6107144   | 4.6481695   |
| "Sfrp4"    | 5.8659906   | 5.9307246   | 9.0766      | 6.3688827   | 7.7889214   | 6.682815    | 6.719398    | 7.2938576   |
| "Sfrp5"    | 2.3548148   | 2.4137046   | 2.383572    | 2.421877    | 2.3951178   | 2.3532782   | 2.3814137   | 2.4363365   |
| "Sfswap"   | 5.140274667 | 5.4844654   | 4.955843333 | 4.5312478   | 5.011686433 | 5.299350433 | 4.631955433 | 4.7623826   |
| "Sft2d1"   | 7.3695183   | 6.772325    | 6.99463     | 6.9432616   | 6.7136703   | 6.9734898   | 7.3566117   | 7.173536    |
| "Sft2d2"   | 4.17271105  | 3.7547084   | 3.71236595  | 3.5934981   | 3.53315015  | 3.6440513   | 4.662266    | 3.63519475  |
| "Sftpa1"   | 2.434596    | 2.539276    | 2.482901    | 2.6043124   | 2.4850078   | 2.4694288   | 2.4814668   | 2.571208    |
| "Sftpc"    | 3.1330028   | 3.3935652   | 3.22529     | 3.3774645   | 3.2302384   | 3.1393373   | 3.215187    | 3.3159597   |
| "Sftpd"    | 2.8715088   | 3.0294266   | 2.9469962   | 2.998001    | 2.915462    | 2.8749483   | 2.9218247   | 2.9768062   |
| "Sfxn1"    | 7.845971    | 5.5963797   | 6.54165875  | 5.5038692   | 8.110711    | 9.25137     | 8.5225765   | 6.1807277   |
| "Sfxn2"    | 4.80261665  | 3.80613985  | 4.07883135  | 3.80386315  | 3.82468605  | 4.1477837   | 4.08966585  | 3.79625035  |
| "Sfxn3"    | 6.0705385   | 6.171466    | 6.9544063   | 6.557552    | 6.5386147   | 6.2810006   | 6.8541613   | 6.5768538   |
| "Sfxn4"    | 3.6788828   | 4.4303265   | 4.441817    | 4.301236    | 4.0974436   | 4.7310014   | 4.3133717   | 4.1609945   |
| "Sgca"     | 10.5202875  | 10.735985   | 10.784034   | 10.631756   | 10.463861   | 10.133834   | 10.537902   | 10.5701     |
| "Sgcb"     | 8.825113    | 8.857222    | 8.897265    | 8.9931765   | 9.004947    | 8.896401    | 9.1388255   | 9.10222     |
| "Sgcd"     | 2.718929    | 2.7384171   | 2.7408905   | 2.8182983   | 2.7550051   | 2.7134466   | 2.7489104   | 2.8166156   |
| "Sgce"     | 7.271887    | 7.4098716   | 8.446593    | 7.958513    | 8.565493    | 7.8061523   | 8.298117    | 8.211996    |
| "Sgcg"     | 10.59583375 | 11.349957   | 10.5528775  | 10.74439775 | 10.9994225  | 10.91671    | 10.6885185  | 10.737038   |
| "Sgip1"    | 2.3955455   | 2.5843041   | 2.5378988   | 2.63706755  | 2.5416065   | 2.518092    | 2.53999815  | 3.06194745  |
| "Sgk1"     | 13.636234   | 13.52832    | 12.255335   | 12.968685   | 12.623632   | 12.577446   | 13.132333   | 13.011936   |
| "Sgk3"     | 5.067567133 | 5.214959967 | 5.082831    | 4.819782167 | 5.041405633 | 6.0516198   | 4.920238    | 4.945904833 |
| "Sgms1"    | 7.61571015  | 7.37839795  | 7.3608578   | 7.3334645   | 7.3298953   | 7.12836215  | 7.45914935  | 7.237509    |
| "Sgol1"    | 2.265158    | 2.3468468   | 2.319437    | 2.4394088   | 2.3170242   | 2.2982354   | 2.3170066   | 2.3614702   |
| "Sgpl1"    | 4.3964114   | 4.387432    | 4.426294    | 4.25063     | 5.4519157   | 6.063205    | 5.0830193   | 4.1407485   |
| "Sgpp1"    | 5.951267867 | 5.8817965   | 6.130738933 | 6.447021    | 6.049133467 | 6.170800333 | 5.758169333 | 6.490519133 |
| "Sgsh"     | 2.493994    | 2.54162645  | 2.4948316   | 2.54839435  | 2.49655065  | 2.655259    | 2.4734577   | 2.52728055  |
| "Sgsm3"    | 2.7955256   | 3.4718094   | 3.4977655   | 2.9761624   | 2.9096308   | 2.790198    | 2.78926     | 2.9557643   |
| "Sgta"     | 8.181126    | 8.679651    | 8.090601    | 8.337194    | 8.265439    | 8.234338    | 8.622605    | 8.212279    |
| "Sgtb"     | 2.9674592   | 2.818687    | 2.7742438   | 2.8768244   | 2.7755535   | 3.2288077   | 2.744038    | 2.8654323   |
| "Sh2b1"    | 7.633382    | 7.8272443   | 8.287418    | 8.464582    | 8.263172    | 7.760295    | 8.535862    | 8.420278    |
| "Sh2b2"    | 2.6100569   | 2.6567392   | 2.6302004   | 2.5537047   | 3.0597045   | 4.594539    | 4.3205357   | 2.5440907   |
| "Sh2d1a"   | 2.7124825   | 2.8837664   | 2.7706068   | 2.918511    | 2.7639868   | 2.7404497   | 2.7455282   | 2.8710668   |
| "Sh2d1b1"  | 2.9644346   | 3.119968    | 3.0927498   | 3.169398    | 3.0936842   | 3.0663161   | 3.0921035   | 3.2299976   |
| "Sh2d3c"   | 4.924749    | 4.7032022   | 4.640627    | 4.370797    | 4.652925    | 5.1128683   | 4.3369865   | 4.6834836   |
| "Sh3bgr"   | 12.70635    | 13.1398325  | 13.659371   | 13.758042   | 13.098009   | 12.990677   | 12.784433   | 13.637807   |
| "Sh3bgrl"  | 8.070546767 | 7.030878133 | 8.186392667 | 8.0465718   | 8.452265    | 8.215609567 | 8.399111667 | 8.1862058   |
| "Sh3bgrl2" | 3.0274866   | 2.8044603   | 2.8253994   | 2.8670297   | 2.7526538   | 2.8890948   | 2.7714837   | 2.8529916   |
| "Sh3bgrl3" | 7.743711    | 6.510123    | 8.196515    | 7.0222516   | 7.5187783   | 8.626226    | 8.005729    | 7.536266    |
| "Sh3bp1"   | 4.8481345   | 4.9646964   | 4.901211    | 5.228505    | 4.9029493   | 4.8926992   | 4.898592    | 5.006428    |
| "Sh3bp2"   | 3.071045    | 2.7701557   | 2.738444    | 2.7915833   | 2.755907    | 4.4671073   | 2.750692    | 2.796703    |
| "Sh3bp4"   | 2.767323    | 3.2446387   | 2.632776    | 2.806674    | 2.7763095   | 2.8322194   | 2.7741666   | 2.7727375   |
| "Sh3bp5"   | 7.10288775  | 6.77371435  | 6.8104991   | 7.0363494   | 6.70103275  | 6.792529    | 6.54235425  | 7.1137952   |
| "Sh3bp5l"  | 5.005143    | 5.7114034   | 5.6710973   | 5.720459    | 5.6903687   | 6.088899    | 5.9903183   | 5.6987767   |
| "Sh3d19"   | 4.8691889   | 4.254267333 | 5.020637233 | 4.7743322   | 4.851841733 | 5.203068767 | 4.828308967 | 4.994171067 |
| "Sh3gl1"   | 4.362627    | 4.3434305   | 4.350484    | 3.8294926   | 4.651946    | 4.615644    | 4.2170258   | 3.8602397   |
| "Sh3gl2"   | 2.5499153   | 2.6179721   | 2.5916595   | 2.6523829   | 2.5934267   | 2.5602472   | 2.589655    | 2.6522346   |
| "Sh3gl3"   | 2.2476804   | 2.364393    | 2.5118003   | 2.4151416   | 2.3360994   | 2.3279562   | 2.3413517   | 2.335452    |
| "Sh3glb1"  | 9.358425333 | 9.480614367 | 9.992705333 | 10.156269   | 9.571585    | 9.505915667 | 9.605274667 | 10.23261633 |
| "Sh3glb2"  | 5.127776    | 4.837258    | 5.904091    | 5.1374874   | 5.622063    | 5.3519087   | 5.8874135   | 5.1672087   |
| "Sh3kbp1"  | 4.2212924   | 3.558440867 | 5.585896133 | 5.4058817   | 4.911538167 | 5.1916999   | 5.292915467 | 5.6519727   |
| "Sh3pxd2a" | 2.322613    | 2.557562    | 2.335365    | 2.241144    | 2.3356278   | 2.3142586   | 2.3188279   | 2.3847117   |
| "Sh3rf1"   | 2.959050467 | 3.120520333 | 3.117804567 | 3.300389133 | 3.073911933 | 2.9937736   | 3.077761933 | 3.2080801   |
| "Sh3tcl"   | 2.5657148   | 2.615964    | 2.5750875   | 2.6268291   | 2.6430006   | 2.5728133   | 2.5580802   | 2.662229    |
| "Sh3yl1"   | 3.4697645   | 3.5595293   | 3.7999017   | 3.4630475   | 3.093983    | 3.2714212   | 3.2766943   | 3.4567387   |
| "Shank3"   | 4.307856    | 4.5807605   | 4.559528    | 4.631738    | 4.5802608   | 5.098995    | 4.7067547   | 4.866557    |
| "Sharpin"  | 7.89449325  | 8.48269775  | 8.1774945   | 8.340968    | 7.9833355   | 7.910546    | 8.121957    | 8.11218065  |
| "Shc1"     | 4.7541447   | 4.845729    | 4.779268    | 4.673626    | 5.05569     | 4.7470784   | 4.7627673   | 4.8379545   |
| "Shcbp1"   | 2.553355    | 2.693491    | 2.6074812   | 2.7303061   | 2.619753    | 2.5677097   | 2.6077194   | 2.6764014   |
| "Shd"      | 2.612975    | 2.7092965   | 2.6350503   | 2.70157     | 2.6437578   | 2.5903354   | 2.6308007   | 2.6970394   |
| "She"      | 5.898844    | 6.2307878   | 6.1565866   | 6.348564    | 6.372557    | 6.4244018   | 6.2911777   | 6.637878    |
| "Shfm1"    | 11.012103   | 10.92166425 | 11.3751605  | 11.3020175  | 11.0516035  | 10.628207   | 11.39988525 | 11.4560515  |
| "Shh"      | 2.3659086   | 2.45402     | 2.4122155   | 2.5035489   | 2.4157145   | 2.3656278   | 2.4109387   | 2.5087533   |
| "Shisa2"   | 8.861649    | 8.9348445   | 9.3366455   | 10.0905065  | 9.1847485   | 7.8430157   | 9.2147655   | 9.520063    |
| "Shisa5"   | 7.67528215  | 6.46317505  | 7.5912435   | 7.0445295   | 7.5950837   | 9.378736    | 8.083109    | 7.20092485  |
| "Shkbp1"   | 4.5299873   | 4.6165347   | 4.596868    | 4.659251    | 4.6655116   | 4.5866585   | 4.754491    | 4.572201    |

|            |             |             |             |             |             |             |             |             |
|------------|-------------|-------------|-------------|-------------|-------------|-------------|-------------|-------------|
| "Shmt1"    | 6.05561415  | 5.35790105  | 5.377517575 | 5.052168775 | 5.179437575 | 4.7562233   | 5.256255425 | 5.09408485  |
| "Shmt2"    | 4.035121825 | 3.876939    | 3.76707615  | 3.962091425 | 3.83610625  | 3.553870075 | 3.79956815  | 3.8455163   |
| "Shoc2"    | 4.22722475  | 4.3704082   | 4.280139    | 4.59838115  | 4.2565728   | 4.24639     | 4.2445045   | 4.56957635  |
| "Shox2"    | 3.4641204   | 3.8087318   | 3.836926    | 3.8496363   | 3.758109    | 3.7875862   | 3.8005874   | 3.8883176   |
| "Shprh"    | 5.2217436   | 6.502523    | 6.4434786   | 6.717767    | 6.7798967   | 6.405319    | 6.4772773   | 6.9093375   |
| "Shroom3"  | 2.6703331   | 3.7197046   | 2.4802541   | 2.614456875 | 2.657649575 | 2.952450725 | 2.609161475 | 2.5959075   |
| "Siae"     | 2.84536815  | 2.96472545  | 3.1495346   | 3.6048515   | 3.22541285  | 3.0622834   | 3.1524495   | 3.5200952   |
| "Siah1a"   | 7.792578375 | 8.347185075 | 6.73902915  | 6.50500705  | 7.283814825 | 7.73628645  | 6.96772075  | 6.84806075  |
| "Siah2"    | 5.9186718   | 6.4876642   | 5.68683325  | 5.9338378   | 6.0544733   | 5.482393    | 5.64874745  | 5.69635475  |
| "Sidt1"    | 2.2861323   | 2.313786    | 2.311963    | 2.4259052   | 2.3135319   | 2.2369158   | 2.3074365   | 2.3471632   |
| "Sidt2"    | 8.3534155   | 8.970061    | 6.927419    | 6.8170753   | 7.8732524   | 9.102881    | 7.3512583   | 7.005064    |
| "Sigirr"   | 3.6793451   | 2.9508939   | 2.927008    | 2.7812505   | 2.9319918   | 3.7262921   | 2.9128428   | 3.0812292   |
| "Siglec1"  | 2.4124267   | 2.47310245  | 2.4640896   | 2.51943645  | 2.43728535  | 2.45769785  | 2.4415649   | 2.5300876   |
| "Siglec5"  | 2.7257118   | 2.9254549   | 2.8367558   | 2.9968903   | 2.8149261   | 2.7854567   | 2.8383002   | 2.948969    |
| "Sigmar1"  | 3.2713322   | 2.7476149   | 3.4474227   | 3.170419    | 3.4059083   | 3.6085117   | 3.5187564   | 3.42625     |
| "Sik1"     | 9.21776     | 8.318127    | 4.5591073   | 4.2940793   | 6.493406    | 7.4490957   | 6.4129195   | 5.0204735   |
| "Sike1"    | 4.973203625 | 4.8360493   | 5.283241425 | 5.328305375 | 5.095180225 | 5.269085475 | 5.327587375 | 5.21333425  |
| "Sil1"     | 7.5270176   | 6.9014163   | 7.8197327   | 7.57477     | 7.1694155   | 7.009561    | 7.822609    | 7.238682    |
| "Sim1"     | 2.76908065  | 3.0842074   | 2.8140587   | 2.91965245  | 2.8253746   | 2.75312475  | 2.8123064   | 2.68210095  |
| "Sim2"     | 4.29462455  | 4.70136405  | 4.0270984   | 4.5355341   | 4.02012345  | 4.16149485  | 4.6281962   | 4.2046485   |
| "Sin3a"    | 5.1562139   | 5.627672833 | 5.0890617   | 5.110257667 | 6.325263533 | 5.371396433 | 5.0991373   | 5.2437917   |
| "Sin3b"    | 6.721898525 | 6.93143825  | 6.946572    | 6.7799055   | 7.036402425 | 6.87930835  | 6.9953785   | 6.64864915  |
| "Sip1"     | 5.338226    | 5.2967896   | 5.2084737   | 5.9055815   | 5.221613    | 4.9973197   | 5.5217514   | 5.518788    |
| "Sipa1"    | 3.4423075   | 3.010482    | 3.4819896   | 3.4994972   | 3.4002092   | 3.9388988   | 3.441177    | 3.5026567   |
| "Sipa1l2"  | 3.560718    | 3.2106051   | 3.4865677   | 2.770489    | 3.023088    | 3.5930455   | 3.1616633   | 3.1306803   |
| "Sirpa"    | 5.916524    | 5.133182    | 6.130107    | 5.916506    | 5.9078584   | 6.5985594   | 6.4232926   | 5.853594    |
| "Sirt1"    | 8.17062     | 8.506339    | 7.270319    | 7.8041773   | 8.275313    | 8.434899    | 7.805783    | 8.011446    |
| "Sirt2"    | 9.042773    | 9.174259    | 9.273974    | 9.374532    | 9.048574    | 9.149447    | 9.294037    | 9.270123    |
| "Sirt3"    | 7.781641    | 6.073116    | 6.906096    | 7.498167    | 7.2355366   | 6.518787    | 6.9375677   | 7.561256    |
| "Sirt4"    | 3.0601885   | 2.8783994   | 2.758802    | 2.9070415   | 2.800374    | 2.8674614   | 2.9082837   | 2.9150467   |
| "Sirt7"    | 5.4210396   | 4.8006725   | 4.022865    | 4.0150237   | 4.588559    | 6.0363803   | 5.0555863   | 4.2682476   |
| "Siva1"    | 6.42866195  | 6.51498935  | 6.64828345  | 6.7129697   | 6.24101475  | 6.11532785  | 7.080330925 | 6.848817925 |
| "Six1"     | 8.573447    | 9.439217    | 8.619067    | 8.791066    | 8.465738    | 8.061277    | 8.46261     | 9.082388    |
| "Six2"     | 2.6467376   | 3.5933309   | 4.0760303   | 2.890404    | 2.3756373   | 2.6571083   | 2.81701     | 2.8790655   |
| "Six3"     | 2.59098975  | 2.7182478   | 2.70138925  | 2.7888657   | 2.70395075  | 2.63187725  | 2.6857359   | 2.74381635  |
| "Six4"     | 6.9691963   | 6.43888     | 7.0805025   | 7.058717    | 7.474625    | 6.197128    | 7.3543983   | 7.195971    |
| "Six5"     | 2.7355583   | 2.777994    | 3.1599352   | 2.864002    | 2.7604158   | 2.6340537   | 2.7581353   | 2.836579    |
| "Six6"     | 2.4093597   | 2.4669366   | 2.4092813   | 2.473208    | 2.4179528   | 2.3694992   | 2.4154022   | 2.5075366   |
| "Ska1"     | 2.6919701   | 2.8441166   | 2.7201445   | 2.8760344   | 2.73033965  | 2.7045142   | 2.72378165  | 2.8395344   |
| "Skap2"    | 6.4104176   | 4.812801    | 5.8156285   | 4.2505827   | 7.3585153   | 7.117711    | 7.2727804   | 5.9613996   |
| "Ski"      | 7.486804    | 7.0910974   | 7.8131835   | 7.782624    | 7.5806074   | 7.5384974   | 7.9824576   | 7.7811823   |
| "Skil"     | 5.554225    | 4.7013843   | 5.3092073   | 5.14752235  | 5.0491114   | 5.098878    | 5.0244301   | 5.17341985  |
| "Skiv2l"   | 5.142801    | 5.284359    | 4.8196373   | 4.9507003   | 4.981945    | 5.0485907   | 4.9793463   | 4.9498897   |
| "Skiv2l2"  | 5.8520962   | 6.1737357   | 5.9592625   | 6.0831235   | 6.04457425  | 6.0356775   | 5.9973197   | 6.15977525  |
| "Skp1a"    | 11.2919285  | 11.3523055  | 11.786825   | 11.812447   | 11.49394    | 11.328606   | 11.834899   | 11.8003915  |
| "Skp2"     | 2.836668025 | 3.05177755  | 2.996022    | 3.099191725 | 2.94126245  | 2.9379687   | 3.3818359   | 3.198830525 |
| "Sla"      | 4.0580263   | 2.7835398   | 3.5996354   | 3.6574996   | 3.9346647   | 6.488373    | 3.856146    | 3.129616    |
| "Slain1"   | 2.6146573   | 2.75843655  | 2.68924165  | 2.769231    | 2.6915182   | 2.74040485  | 2.691772    | 2.76138485  |
| "Slain2"   | 8.769881    | 8.48673765  | 8.5706535   | 8.7364525   | 8.295647    | 8.1292795   | 9.0287035   | 8.74443785  |
| "Slamf1"   | 2.9659636   | 3.2705967   | 3.1355605   | 3.2978268   | 3.172477    | 3.056774    | 3.1750078   | 3.248939    |
| "Slamf7"   | 2.980923    | 3.3258832   | 3.1636126   | 3.2230358   | 3.1954174   | 3.1566277   | 3.1705837   | 3.2181878   |
| "Slamf9"   | 3.294684    | 3.6425765   | 4.053583    | 3.700858    | 3.5572722   | 3.6659172   | 4.632321    | 3.627488    |
| "Slbp"     | 6.9497166   | 6.6428223   | 7.6805534   | 7.3496795   | 7.628435    | 7.810641    | 7.6930914   | 7.498882    |
| "Slc10a1"  | 8.1833207   | 2.240955    | 2.19602575  | 2.2628084   | 2.39774125  | 2.1605367   | 2.1903708   | 2.24754175  |
| "Slc10a2"  | 2.743485    | 2.9195478   | 2.8014503   | 2.978212    | 2.8128948   | 2.7510602   | 2.8018322   | 2.92989     |
| "Slc10a3"  | 5.177476    | 5.11537     | 5.063284    | 4.272146    | 5.235317    | 5.5228014   | 5.094824    | 4.3096433   |
| "Slc10a6"  | 7.883168    | 8.769984    | 4.8997564   | 4.7486897   | 6.9570713   | 7.966321    | 5.6397285   | 4.2996683   |
| "Slc11a1"  | 6.8710194   | 4.203058    | 5.0730157   | 4.782651    | 5.323953    | 6.175834    | 6.0248723   | 4.73227     |
| "Slc11a2"  | 3.847181533 | 3.752497267 | 3.7891051   | 4.077145267 | 3.679455433 | 3.438579067 | 3.739814367 | 3.8577746   |
| "Slc12a1"  | 2.9872084   | 3.2202613   | 3.170365    | 3.2885067   | 3.1421728   | 3.0254097   | 3.1301425   | 3.2560842   |
| "Slc12a2"  | 10.34643867 | 11.98625567 | 9.789588333 | 9.832589    | 11.057253   | 11.37170367 | 10.04817567 | 10.14880967 |
| "Slc12a4"  | 5.5168986   | 5.0858703   | 5.585184    | 5.1789904   | 5.5376887   | 5.0881824   | 5.2075014   | 5.3739147   |
| "Slc12a6"  | 6.1008592   | 7.33661655  | 6.26256115  | 6.5849156   | 6.59371     | 7.2660318   | 5.91569125  | 6.90059945  |
| "Slc12a7"  | 5.5486937   | 4.9652886   | 5.3748407   | 5.1114583   | 5.8234463   | 6.462817    | 5.8909335   | 5.1259413   |
| "Slc12a8"  | 2.3967957   | 2.4865527   | 2.4179409   | 2.5483193   | 2.4167378   | 2.3689954   | 2.417247    | 2.4971132   |
| "Slc12a9"  | 3.823218    | 4.393136    | 4.3911734   | 4.459412    | 4.390602    | 4.6233907   | 4.388026    | 4.241738    |
| "Slc13a3"  | 2.827613167 | 2.796205967 | 2.726246233 | 2.8416978   | 2.7328471   | 2.673286567 | 2.727161033 | 2.8101775   |
| "Slc14a1"  | 2.5440089   | 2.66690925  | 2.61907065  | 2.73839105  | 2.61606995  | 2.58094435  | 2.5925567   | 2.71955145  |
| "Slc15a1"  | 2.9295592   | 3.2461903   | 3.048163    | 3.1906219   | 3.050744    | 2.9836805   | 3.0367053   | 3.1232152   |
| "Slc15a2"  | 7.178687    | 4.241891    | 7.908542    | 5.0091524   | 4.323915    | 4.7113495   | 5.6123943   | 7.5539484   |
| "Slc15a3"  | 5.275285    | 2.0343876   | 2.0430722   | 2.0949116   | 2.0344188   | 2.022444    | 2.1911743   | 2.0971334   |
| "Slc15a4"  | 8.85475     | 9.754462    | 6.6134214   | 6.8684106   | 8.175728    | 9.163372    | 7.494682    | 6.7591505   |
| "Slc15a5"  | 2.8437767   | 3.1963506   | 2.8971634   | 6.6087146   | 2.9202018   | 2.9408245   | 2.9506478   | 3.408792    |
| "Slc16a1"  | 10.817605   | 10.482405   | 10.135847   | 11.112255   | 10.561901   | 10.418767   | 10.660351   | 11.027109   |
| "Slc16a11" | 2.784736    | 2.8230352   | 2.8158169   | 2.9074297   | 2.7821705   | 2.780756    | 2.8123736   | 2.8682437   |
| "Slc16a2"  | 3.07328025  | 2.79260995  | 3.1348814   | 3.0436543   | 3.06203315  | 2.8694395   | 2.9858526   | 3.03507545  |
| "Slc16a3"  | 3.4856591   | 5.02501     | 5.501008    | 5.643016    | 4.9286823   | 4.7132335   | 3.6274915   | 4.93484     |
| "Slc16a6"  | 5.6041493   | 4.3703327   | 4.644314    | 5.042889    | 5.1067634   | 4.8375373   | 4.6843104   | 3.8381793   |
| "Slc16a7"  | 6.690667    | 3.019865    | 3.4056122   | 3.0637116   | 2.9178917   | 3.4705577   | 3.2777963   | 3.0747633   |
| "Slc17a1"  | 4.328163    | 2.163239    | 2.1430123   | 2.215201    | 2.142802    | 2.119648    | 2.1323195   | 2.2106965   |
| "Slc17a2"  | 6.4092632   | 2.78561055  | 2.70607785  | 2.8276725   | 2.71729745  | 2.6556186   | 2.7086755   | 2.7833253   |

|            |             |             |             |             |             |             |             |             |
|------------|-------------|-------------|-------------|-------------|-------------|-------------|-------------|-------------|
| "Slc17a6"  | 2.5734034   | 2.7715156   | 2.669214    | 2.7960663   | 2.6786544   | 2.5774715   | 2.6758616   | 2.754392    |
| "Slc17a9"  | 2.66038     | 2.7795675   | 2.5769382   | 2.7105794   | 2.6669886   | 2.6621776   | 2.6659927   | 2.6746604   |
| "Slc19a1"  | 4.31168875  | 4.3723509   | 4.3444383   | 4.29715015  | 4.6099924   | 4.30762005  | 4.92358955  | 4.4742005   |
| "Slc19a2"  | 7.1582775   | 6.6796117   | 4.0785203   | 5.1714754   | 6.6346464   | 6.3866544   | 4.157029    | 5.344906    |
| "Slc1a1"   | 3.391813    | 4.08675585  | 3.20033135  | 3.35581005  | 3.7976185   | 3.3558334   | 3.2828932   | 3.2935597   |
| "Slc1a2"   | 2.3973498   | 1.8704585   | 1.8561684   | 1.9157273   | 1.8546441   | 1.8279412   | 1.8528321   | 1.919421    |
| "Slc1a3"   | 2.703754567 | 2.9374372   | 2.894534867 | 2.678383133 | 4.9467915   | 5.679937    | 4.290045667 | 2.927796867 |
| "Slc1a4"   | 4.192273    | 4.2724895   | 5.4050813   | 4.317298    | 4.2005777   | 4.020774    | 4.0010324   | 4.4780316   |
| "Slc1a5"   | 5.3393807   | 6.045211    | 7.206953    | 5.529331    | 8.685813    | 8.2425165   | 8.448994    | 6.8930473   |
| "Slc20a1"  | 8.772199    | 5.6295209   | 4.58720265  | 4.64842975  | 5.23820325  | 5.32453665  | 4.9724884   | 4.7546396   |
| "Slc20a2"  | 6.9812315   | 7.6478775   | 6.291721    | 6.3700655   | 7.42002535  | 6.93126685  | 6.10351905  | 6.23934035  |
| "Slc22a1"  | 6.428425    | 3.8777404   | 3.829148    | 3.9285545   | 3.858185    | 3.5773835   | 3.8737864   | 3.9277406   |
| "Slc22a12" | 2.7979701   | 2.9881865   | 2.9681778   | 2.96005785  | 2.8514779   | 2.76758145  | 2.84280395  | 2.906701    |
| "Slc22a17" | 2.8245149   | 2.8723335   | 2.8605807   | 2.8906188   | 2.8605154   | 2.7555192   | 2.8556542   | 2.884514    |
| "Slc22a18" | 2.4480176   | 1.946513    | 1.9272176   | 1.9954641   | 1.9136219   | 1.886057    | 1.88606     | 1.957899    |
| "Slc22a19" | 2.3280325   | 2.470024    | 2.363429    | 2.4687665   | 2.3670366   | 2.3263397   | 2.363609    | 2.4398484   |
| "Slc22a21" | 2.697951    | 3.0154216   | 2.7448115   | 2.8717062   | 2.757584    | 2.6602645   | 2.7237425   | 2.85704     |
| "Slc22a23" | 5.7415085   | 5.1002784   | 4.399909    | 5.258566    | 5.5680456   | 5.5053816   | 5.079365    | 5.058074    |
| "Slc22a26" | 6.76086415  | 2.14364175  | 2.1117963   | 2.1921474   | 2.1228484   | 2.0871098   | 2.1203091   | 2.1968925   |
| "Slc22a27" | 3.0660496   | 3.0550568   | 3.0067296   | 3.1706693   | 3.04141     | 2.9662552   | 2.9935389   | 3.1021388   |
| "Slc22a29" | 3.21326245  | 3.51850675  | 3.35767555  | 3.8929095   | 3.2599889   | 3.1743741   | 3.3555674   | 3.5117259   |
| "Slc22a3"  | 2.3189096   | 2.383706    | 2.3530748   | 2.3961387   | 2.7372086   | 2.3696496   | 2.6029792   | 2.4263291   |
| "Slc22a30" | 2.9654958   | 2.5929368   | 2.6514018   | 2.6819372   | 2.5520341   | 2.5132682   | 2.5225394   | 2.6653385   |
| "Slc22a4"  | 4.651461    | 4.218093    | 4.1920815   | 3.3034086   | 6.001408    | 6.5089006   | 4.042393    | 4.4545975   |
| "Slc22a5"  | 6.7888846   | 6.4163585   | 6.8161235   | 7.0305014   | 7.480606    | 7.2395587   | 6.7189884   | 7.5085244   |
| "Slc22a6"  | 2.8377097   | 3.13988035  | 2.9121308   | 3.04273915  | 2.9135488   | 2.8809261   | 2.90471255  | 3.00923045  |
| "Slc23a1"  | 2.74527895  | 2.51307285  | 2.40245815  | 2.512512    | 2.4044769   | 2.35408055  | 2.39905775  | 2.499174    |
| "Slc23a2"  | 4.177528    | 3.5578833   | 3.7492886   | 3.8270953   | 3.8540242   | 4.321914    | 3.7296357   | 4.1614323   |
| "Slc24a3"  | 4.645862    | 4.7163696   | 6.2449617   | 5.390118    | 6.7449675   | 6.0716343   | 7.0869265   | 5.649811    |
| "Slc24a6"  | 7.656401    | 6.498357    | 5.910685    | 5.5864325   | 7.420126    | 7.422391    | 6.586067    | 6.0138073   |
| "Slc25a10" | 3.81705075  | 3.4428091   | 3.90284575  | 3.28313125  | 4.31582765  | 3.93245675  | 4.88610995  | 3.2978889   |
| "Slc25a11" | 9.979282    | 9.76019     | 10.389287   | 10.514506   | 10.208965   | 9.444491    | 10.22485    | 10.431157   |
| "Slc25a13" | 5.3455005   | 1.8321334   | 1.8239896   | 1.8755379   | 1.8167671   | 1.7929378   | 1.8158243   | 1.8774474   |
| "Slc25a14" | 3.9013066   | 5.0156116   | 3.8689265   | 3.9677205   | 4.05353     | 3.8991342   | 3.897584    | 3.948212    |
| "Slc25a15" | 7.2960736   | 3.89738885  | 4.99296365  | 5.1411827   | 4.5848697   | 4.06838985  | 4.5686439   | 5.08640655  |
| "Slc25a17" | 7.6028185   | 7.741331    | 6.9021025   | 6.3596997   | 7.5470333   | 7.7532315   | 7.2188506   | 6.8523455   |
| "Slc25a19" | 4.0370615   | 4.205228367 | 4.4318768   | 4.6307833   | 4.2771213   | 3.900866833 | 5.140731467 | 4.559566633 |
| "Slc25a2"  | 2.333911    | 2.4010978   | 2.3755784   | 2.479653    | 2.3759332   | 2.3677616   | 2.3608375   | 2.4472861   |
| "Slc25a20" | 9.7057505   | 9.584658    | 9.67643     | 9.705087    | 10.5689005  | 10.061071   | 9.581514    | 10.119409   |
| "Slc25a22" | 7.3859024   | 5.754405    | 5.8059115   | 5.1941943   | 6.306609    | 5.873451    | 5.828862    | 5.860319    |
| "Slc25a23" | 2.9615016   | 2.8208306   | 2.8007047   | 2.822357    | 3.4623973   | 2.6721365   | 2.8685853   | 2.8783412   |
| "Slc25a24" | 3.057391    | 3.0461721   | 3.0695562   | 3.1202726   | 3.070187    | 3.0131311   | 3.0692444   | 3.2052035   |
| "Slc25a25" | 7.076831    | 4.1632185   | 5.495517    | 5.1362133   | 4.200691    | 4.479039    | 6.574548    | 5.2088823   |
| "Slc25a26" | 5.02624105  | 5.7564039   | 5.798789    | 6.0803547   | 5.21557335  | 5.1538185   | 5.3690723   | 5.76566325  |
| "Slc25a28" | 8.70037     | 9.926496    | 7.7013345   | 7.764044    | 8.735265    | 8.982941    | 8.246623    | 7.711624    |
| "Slc25a29" | 3.5474714   | 3.52969602  | 3.28567158  | 3.43650038  | 3.41984354  | 3.28147864  | 3.34861026  | 3.46476916  |
| "Slc25a30" | 5.122548233 | 5.174560533 | 3.308853667 | 4.3719783   | 4.364096    | 7.189461833 | 4.123569333 | 4.1483485   |
| "Slc25a33" | 10.953972   | 11.734724   | 8.544529    | 8.41411     | 9.594868    | 11.777935   | 7.9829535   | 8.746082    |
| "Slc25a35" | 2.76806     | 2.3973522   | 3.48775     | 3.2759528   | 2.7865999   | 2.8611834   | 5.2156878   | 3.2451723   |
| "Slc25a36" | 6.3571981   | 5.96495975  | 6.1575479   | 6.263772    | 6.53191785  | 6.65953115  | 6.694495    | 6.6598065   |
| "Slc25a37" | 6.2185464   | 5.5793924   | 5.9923      | 6.3187914   | 5.9536047   | 6.3729506   | 6.40074     | 6.6607194   |
| "Slc25a38" | 5.4276953   | 5.6255927   | 4.9984827   | 5.091078    | 5.2296934   | 5.6084023   | 5.0517855   | 5.2586555   |
| "Slc25a39" | 8.9631015   | 6.7727464   | 8.060722133 | 8.068334867 | 7.6418818   | 7.425035833 | 8.225896667 | 8.008003467 |
| "Slc25a4"  | 12.80974163 | 13.0154355  | 13.2302964  | 13.4773666  | 13.1733925  | 12.86544833 | 12.87624005 | 13.39694225 |
| "Slc25a42" | 4.0149307   | 4.0179214   | 4.0188847   | 4.0541897   | 4.2643523   | 4.071767    | 3.9561346   | 4.055488    |
| "Slc25a44" | 5.94829675  | 6.38034685  | 5.6399341   | 5.6946538   | 5.843658    | 6.1417744   | 5.95336235  | 5.76409535  |
| "Slc25a45" | 2.3022833   | 2.1109884   | 2.1629243   | 2.1922991   | 2.1467166   | 2.9718773   | 2.1608353   | 2.1698718   |
| "Slc25a46" | 9.565607    | 9.7310265   | 9.5313245   | 9.7938285   | 10.033897   | 9.7079555   | 9.479501    | 9.7963195   |
| "Slc25a47" | 10.716991   | 2.5123868   | 3.6380463   | 3.4065113   | 4.4417      | 3.154876    | 3.3557746   | 4.0056367   |
| "Slc25a5"  | 8.845064988 | 7.613746463 | 7.458526375 | 7.4248721   | 8.1762538   | 8.171918575 | 8.47968045  | 7.38899305  |
| "Slc26a1"  | 3.2904313   | 2.4966137   | 2.4554152   | 2.559825    | 2.469352    | 2.4198558   | 2.45356     | 2.529973    |
| "Slc26a2"  | 3.9158615   | 4.20963225  | 4.6109577   | 4.64136125  | 4.33630435  | 3.87812215  | 4.7964966   | 4.4381882   |
| "Slc26a3"  | 2.5146031   | 2.6761742   | 2.564326    | 2.701325    | 2.5778978   | 2.4985595   | 2.562573    | 2.6845098   |
| "Slc26a5"  | 2.2923899   | 2.3907387   | 2.3338      | 2.4257302   | 2.3363826   | 2.291753    | 2.3328438   | 2.4395688   |
| "Slc26a6"  | 1.954695    | 1.9878643   | 2.1816251   | 3.9635835   | 2.1676755   | 1.8091338   | 2.1668386   | 3.3895442   |
| "Slc26a8"  | 2.2809386   | 2.4029744   | 2.3520539   | 2.4388628   | 2.352151    | 2.3233173   | 2.3473682   | 2.429109    |
| "Slc27a1"  | 6.188341    | 6.683033    | 5.8637533   | 6.2386665   | 8.129292    | 8.568296    | 7.1980615   | 6.713186    |
| "Slc27a2"  | 10.882772   | 2.9486525   | 4.4666204   | 3.5734806   | 5.1485696   | 3.1393592   | 3.3398094   | 5.1682873   |
| "Slc27a4"  | 3.1800797   | 2.809401    | 3.1666107   | 3.197042    | 3.5632718   | 3.557247    | 3.3412566   | 3.4199712   |
| "Slc27a5"  | 10.1382675  | 2.2722812   | 2.3244648   | 2.3154676   | 2.6182437   | 2.2107613   | 2.237751    | 2.3187582   |
| "Slc28a3"  | 2.3501892   | 2.392894    | 2.3710032   | 2.5207472   | 2.376981    | 2.321489    | 2.371507    | 2.4247665   |
| "Slc29a1"  | 5.7385387   | 4.9571557   | 4.147018    | 3.5770824   | 4.7103715   | 5.0860662   | 4.055113    | 3.9597363   |
| "Slc29a2"  | 1.9079146   | 1.9321437   | 1.9270864   | 2.5476103   | 1.9259623   | 1.8883078   | 1.9192586   | 1.9778457   |
| "Slc29a3"  | 3.0186007   | 3.2668459   | 3.54661155  | 3.39718905  | 3.35097275  | 3.6196718   | 3.58519675  | 3.3975401   |
| "Slc29a4"  | 2.4013176   | 2.4619853   | 2.420884    | 2.5428152   | 2.4214342   | 2.3797371   | 2.4201915   | 2.5103247   |
| "Slc2a1"   | 7.787501833 | 6.2732556   | 6.217353167 | 6.083869433 | 6.851921133 | 7.179681    | 6.654773667 | 6.335855767 |
| "Slc2a10"  | 2.392189    | 2.50972365  | 2.6646706   | 2.6214607   | 2.440391    | 2.40039265  | 2.4783642   | 2.4844359   |
| "Slc2a2"   | 6.3506026   | 2.0093217   | 1.9968436   | 2.0648928   | 1.9965429   | 1.9693611   | 1.9900106   | 2.0532725   |
| "Slc2a3"   | 3.322493133 | 5.3069447   | 3.262878    | 4.201800733 | 3.6451597   | 4.861505667 | 3.2657478   | 3.374559167 |
| "Slc2a4"   | 9.43582885  | 9.9316795   | 10.1314155  | 10.3902985  | 10.1568745  | 9.68328725  | 9.82889675  | 10.1974665  |
| "Slc2a5"   | 2.19388     | 2.2529788   | 2.2198827   | 2.3200123   | 2.232493    | 2.1692498   | 2.4497292   | 2.3006473   |

|            |             |             |             |             |             |             |             |             |
|------------|-------------|-------------|-------------|-------------|-------------|-------------|-------------|-------------|
| "Slc2a8"   | 5.90089     | 6.0287075   | 6.1051407   | 6.113691    | 6.245527    | 5.932366    | 5.8298335   | 5.7662783   |
| "Slc30a1"  | 4.9023323   | 5.5889616   | 4.4886684   | 4.707412    | 4.945409    | 4.6362576   | 4.5167246   | 4.653018    |
| "Slc30a2"  | 3.13394     | 8.563058    | 2.7717261   | 6.1218805   | 3.6881952   | 7.7576494   | 2.999719    | 3.6734748   |
| "Slc30a3"  | 4.2345843   | 4.635031    | 4.4040985   | 4.415616    | 4.7603884   | 4.207296    | 4.3686523   | 3.9455478   |
| "Slc30a4"  | 7.796229    | 8.536409    | 9.003248    | 9.070892    | 8.499646    | 8.474625    | 8.958157    | 9.000488    |
| "Slc30a5"  | 6.652304    | 7.13379     | 7.030472    | 6.798708    | 7.1089573   | 7.870886    | 6.7882915   | 7.0587177   |
| "Slc30a6"  | 6.468531    | 6.3667746   | 6.4980464   | 6.441022    | 6.360595    | 6.485846    | 6.654241    | 6.522891    |
| "Slc30a7"  | 4.0581417   | 3.769805    | 4.32045     | 3.9997568   | 4.066689    | 4.443664    | 3.984915    | 3.4005098   |
| "Slc30a9"  | 9.480508    | 9.476507    | 10.195618   | 10.27717    | 9.756647    | 9.457277    | 9.948872    | 10.119919   |
| "Slc31a1"  | 5.690339    | 5.23511685  | 5.08686525  | 5.2873285   | 5.46519065  | 5.5186495   | 5.3442645   | 5.2590333   |
| "Slc31a2"  | 3.7188168   | 3.68545325  | 4.3144905   | 3.65559175  | 3.9189397   | 4.041909    | 3.923023    | 3.8086679   |
| "Slc32a1"  | 4.286205    | 5.0558124   | 4.3433037   | 4.3646865   | 4.4245896   | 4.3078103   | 4.345853    | 4.338387    |
| "Slc33a1"  | 6.1205053   | 5.3644915   | 6.6156526   | 6.221797    | 6.1731005   | 5.693943    | 6.34703     | 6.3642173   |
| "Slc34a2"  | 3.3539217   | 2.214993    | 2.208884    | 2.25104     | 2.2069514   | 2.1600368   | 2.2054908   | 2.2781081   |
| "Slc35a1"  | 6.519054    | 5.92213085  | 6.8987315   | 6.6602984   | 6.2676773   | 5.97447825  | 6.9182377   | 6.77130245  |
| "Slc35a2"  | 3.946690167 | 3.9901565   | 4.018799467 | 3.984869367 | 3.921400233 | 4.0402069   | 3.815349633 | 3.977187333 |
| "Slc35a3"  | 2.7185714   | 2.3127565   | 2.2813973   | 2.350651    | 2.3034663   | 2.1961586   | 2.2881212   | 2.8691099   |
| "Slc35a4"  | 6.4338285   | 7.512111    | 7.0213343   | 7.32237585  | 6.86643885  | 7.16516965  | 7.194874    | 7.1112855   |
| "Slc35a5"  | 4.373024667 | 4.7075581   | 4.7582358   | 4.914752233 | 5.0170006   | 5.001124633 | 5.071306733 | 5.041174433 |
| "Slc35b1"  | 9.007175    | 9.367644    | 9.68672     | 9.360446    | 9.184446    | 8.936694    | 9.491453    | 9.517747    |
| "Slc35b2"  | 5.827795    | 6.408678    | 6.335934    | 6.178735    | 5.9980936   | 6.029632    | 6.125169    | 6.175829    |
| "Slc35b3"  | 7.160397    | 7.2412987   | 6.5292645   | 6.3242693   | 6.8253756   | 6.9991965   | 6.5253897   | 6.359151    |
| "Slc35b4"  | 2.47731415  | 2.322541    | 2.5661037   | 2.6235094   | 2.6224703   | 2.6278975   | 3.16195     | 2.6631756   |
| "Slc35c1"  | 3.1337512   | 3.1344874   | 2.9931161   | 3.1082869   | 3.1437578   | 2.9336832   | 2.9765925   | 2.8079107   |
| "Slc35c2"  | 5.0450344   | 5.4417524   | 5.1399164   | 4.7103553   | 4.9989557   | 4.820513    | 4.9617767   | 4.9829283   |
| "Slc35d1"  | 6.353096    | 4.9199805   | 5.1267357   | 5.142653    | 4.8726344   | 4.44145     | 4.939535    | 5.4171796   |
| "Slc35e1"  | 7.537778    | 8.2365748   | 7.555492    | 7.7117631   | 7.750913    | 7.58973215  | 7.65784825  | 7.451091    |
| "Slc35e4"  | 6.35512835  | 6.65352345  | 6.4220798   | 6.4843782   | 6.7944529   | 6.2658625   | 6.35812575  | 6.3063526   |
| "Slc35f4"  | 2.29767     | 2.3790653   | 2.3390229   | 2.4294462   | 2.3411438   | 2.3099656   | 2.3381655   | 2.426701    |
| "Slc35f5"  | 8.856989    | 9.480669    | 7.884127    | 8.446557    | 8.644628    | 9.326953    | 7.8216276   | 8.604465    |
| "Slc37a1"  | 2.2218974   | 2.8943243   | 2.24461     | 2.2515574   | 2.292968    | 2.3132284   | 2.242499    | 2.2534337   |
| "Slc37a2"  | 2.794716    | 2.9044662   | 3.008876    | 2.984981    | 2.9597788   | 2.9550927   | 3.0635827   | 2.9034774   |
| "Slc37a3"  | 4.9709022   | 4.9430235   | 5.15100035  | 5.292202    | 5.1431332   | 5.540973    | 5.1945382   | 5.3479945   |
| "Slc37a4"  | 8.5259905   | 8.826559    | 9.363844    | 9.290515    | 8.252419    | 8.407967    | 7.4698      | 8.4195795   |
| "Slc38a10" | 5.4780514   | 5.115075933 | 5.655482183 | 5.4629676   | 5.417099283 | 5.2748645   | 5.530620767 | 5.629624267 |
| "Slc38a2"  | 11.65181    | 10.570158   | 10.16171    | 10.482166   | 10.406328   | 11.582102   | 10.53487    | 10.546089   |
| "Slc38a3"  | 9.505785    | 7.3072724   | 7.7454057   | 8.005797    | 7.9366593   | 6.1663976   | 7.099586    | 8.13742     |
| "Slc38a4"  | 10.529396   | 9.5848275   | 8.742682    | 8.9162133   | 9.20883     | 10.02371725 | 8.410621    | 8.6709805   |
| "Slc39a1"  | 8.136335    | 7.101887    | 8.836655    | 8.743789    | 8.15629     | 7.9957075   | 8.676975    | 8.59856     |
| "Slc39a11" | 3.6239026   | 2.967897    | 3.4477296   | 3.4799662   | 3.199963    | 3.1533928   | 4.1023693   | 3.1797094   |
| "Slc39a13" | 6.264074    | 6.3292403   | 6.7720094   | 6.527013    | 6.320748    | 6.056093    | 6.4858103   | 6.2611365   |
| "Slc39a14" | 6.0491508   | 6.65429515  | 3.1317564   | 3.2500324   | 4.5467178   | 6.32378965  | 3.431748    | 3.1332572   |
| "Slc39a3"  | 4.124654    | 4.36544535  | 4.2508559   | 4.3639312   | 4.2015597   | 4.218977    | 4.01556215  | 4.3500735   |
| "Slc39a4"  | 3.9841766   | 2.012135    | 1.995174    | 2.050095    | 1.9930767   | 1.9681318   | 1.986957    | 2.051426    |
| "Slc39a6"  | 5.5696483   | 5.0309567   | 6.6196437   | 5.8145895   | 5.608912    | 6.317237    | 5.8985267   | 5.8474684   |
| "Slc39a7"  | 8.718412    | 8.757763    | 8.933751    | 8.776734    | 8.726288    | 8.79424     | 8.70446     | 8.516931    |
| "Slc39a8"  | 6.954315    | 2.7499714   | 2.9688118   | 3.0443454   | 2.9805188   | 3.6561065   | 3.000262    | 3.0569963   |
| "Slc39a9"  | 4.757994    | 4.514999    | 4.7757907   | 4.61085     | 5.2254906   | 5.6412787   | 4.7557445   | 4.8163815   |
| "Slc3a1"   | 8.095481    | 1.8965583   | 1.8912891   | 1.9506412   | 1.8974133   | 1.83591     | 1.8603044   | 1.9487258   |
| "Slc3a2"   | 8.143359    | 8.103771    | 7.381923    | 6.9366035   | 8.05367     | 9.000358    | 7.9105387   | 7.1834636   |
| "Slc40a1"  | 8.7415993   | 9.44149775  | 6.79913365  | 7.9019652   | 9.442758    | 9.22328785  | 7.45462915  | 7.9454835   |
| "Slc41a1"  | 7.562963    | 7.9079776   | 8.142775    | 8.17647     | 8.643829    | 7.9486885   | 8.24601     | 8.372078    |
| "Slc41a2"  | 7.088046    | 3.3743055   | 3.3777108   | 3.4343648   | 3.3042498   | 3.5446968   | 3.3746047   | 2.9461756   |
| "Slc41a3"  | 7.4417405   | 6.379345267 | 7.729552667 | 7.824526    | 6.376597233 | 5.7603225   | 6.1327224   | 7.1588899   |
| "Slc43a3"  | 8.871212    | 8.771305    | 7.2628636   | 7.6173244   | 9.406272    | 9.675507    | 7.7747054   | 8.051117    |
| "Slc44a1"  | 7.7712295   | 6.99743795  | 8.209593    | 7.9006738   | 7.9157145   | 7.60902125  | 8.0212678   | 7.8007105   |
| "Slc44a2"  | 6.302127833 | 6.551202833 | 6.8465003   | 6.564757867 | 6.4495705   | 6.115621067 | 6.5940432   | 6.932696233 |
| "Slc44a3"  | 2.4253087   | 2.5401282   | 2.5032413   | 2.6043262   | 2.5035028   | 2.4565196   | 2.703518    | 2.579578    |
| "Slc44a4"  | 2.3320048   | 2.406275    | 2.3636262   | 2.4635825   | 2.3641021   | 2.3284087   | 2.3632274   | 2.454101    |
| "Slc45a3"  | 5.6159955   | 3.2921078   | 3.51465165  | 3.339043    | 3.2857973   | 3.2676281   | 3.1658022   | 3.25372135  |
| "Slc46a1"  | 2.394542    | 2.442345    | 2.4001355   | 2.5113325   | 2.4051216   | 2.3609102   | 2.4145234   | 2.4910157   |
| "Slc46a3"  | 4.2511916   | 2.825809    | 4.37782     | 4.614973    | 3.8341732   | 4.407091    | 4.6734033   | 4.494814    |
| "Slc47a1"  | 8.409828    | 7.2368965   | 7.7446675   | 8.517681    | 8.251714    | 6.4967637   | 8.611891    | 7.716478    |
| "Slc48a1"  | 6.51027935  | 6.6902058   | 6.5793579   | 6.2107      | 6.8869015   | 6.8401635   | 6.74281785  | 6.3554919   |
| "Slc4a1"   | 3.52947335  | 4.1128895   | 3.40868035  | 3.5404321   | 3.6833924   | 5.32731735  | 3.29364565  | 5.39880075  |
| "Slc4a10"  | 2.3076851   | 2.3842874   | 2.349261    | 2.4680934   | 2.3489575   | 2.3044488   | 2.3462381   | 2.4248173   |
| "Slc4a1ap" | 6.5572314   | 7.5900927   | 6.401804    | 6.7957516   | 6.822312    | 7.104551    | 6.5919476   | 6.9161315   |
| "Slc4a2"   | 4.6611834   | 5.1948557   | 4.534174    | 4.4577236   | 5.075429    | 4.5821776   | 4.5617404   | 4.51304     |
| "Slc4a3"   | 2.9204597   | 3.0471404   | 3.0592096   | 3.0887663   | 3.2383125   | 2.5216196   | 3.428623    | 3.2833314   |
| "Slc4a4"   | 6.782386733 | 3.953441933 | 6.922035733 | 7.583572667 | 6.0547822   | 6.3622985   | 6.531392667 | 7.0022733   |
| "Slc4a5"   | 2.3328881   | 2.395662    | 2.3553638   | 2.4523892   | 2.357534    | 2.3111076   | 2.3546731   | 2.4450645   |
| "Slc4a7"   | 7.2214394   | 6.742299    | 7.0947475   | 7.254508    | 7.5639677   | 7.504095    | 7.4602075   | 7.2966313   |
| "Slc4a8"   | 2.6290307   | 2.70488275  | 2.65823735  | 2.75921105  | 2.6573526   | 2.61766685  | 2.64258215  | 2.72148875  |
| "Slc50a1"  | 5.6989226   | 5.4214854   | 6.3364086   | 6.331883    | 6.4811316   | 6.317647    | 6.5243144   | 6.5406246   |
| "Slc52a2"  | 4.309019733 | 4.514455533 | 4.532956433 | 4.6897841   | 4.2706682   | 4.224359433 | 4.506267067 | 4.412307633 |
| "Slc52a3"  | 4.043962    | 4.200665    | 4.0912685   | 4.1229696   | 4.023824    | 4.08117     | 4.1308002   | 4.120282    |
| "Slc5a1"   | 2.70298005  | 2.8899563   | 2.7923416   | 2.96575735  | 2.7995783   | 2.7250118   | 2.7843586   | 2.9053564   |
| "Slc5a2"   | 2.6223302   | 2.71949015  | 3.10425795  | 2.92305755  | 2.6489421   | 2.6151018   | 2.76399795  | 2.7650342   |
| "Slc5a3"   | 2.361363    | 2.4855099   | 2.3972924   | 2.4971457   | 2.3988817   | 2.3598351   | 2.3963375   | 2.4666839   |
| "Slc5a6"   | 2.8988545   | 3.3295228   | 3.3356133   | 3.2858741   | 3.712314    | 3.4407115   | 4.052413    | 3.2733624   |
| "Slc6a1"   | 2.6099472   | 2.8137891   | 2.6132486   | 2.833689    | 2.6489992   | 2.5240376   | 2.638844    | 2.752499    |

|            |             |             |             |             |             |             |             |             |
|------------|-------------|-------------|-------------|-------------|-------------|-------------|-------------|-------------|
| "Slc6a13"  | 4.7211432   | 1.8589427   | 1.8499291   | 1.9165192   | 1.8526895   | 1.8177631   | 1.848238    | 1.9050165   |
| "Slc6a14"  | 2.9790595   | 3.253771    | 3.1214912   | 3.3008454   | 3.135852    | 3.0422134   | 3.114654    | 3.2422934   |
| "Slc6a15"  | 2.6349032   | 2.7209353   | 2.6420531   | 2.8058302   | 2.6609337   | 2.591269    | 2.6449153   | 2.7515368   |
| "Slc6a17"  | 2.3326316   | 2.563742    | 2.3521402   | 2.4241927   | 2.3413012   | 2.3256607   | 2.3379045   | 2.4101727   |
| "Slc6a18"  | 2.430151    | 2.535542    | 2.4875407   | 2.608749    | 2.6120286   | 2.4317837   | 2.4865093   | 2.5689526   |
| "Slc6a20a" | 2.34346     | 2.440531    | 2.3836641   | 2.4955552   | 2.3897438   | 2.3433862   | 2.3827438   | 2.4784398   |
| "Slc6a3"   | 2.3854327   | 2.458876    | 2.4162648   | 2.5172257   | 2.4208677   | 2.3824425   | 2.4152937   | 2.487166    |
| "Slc6a5"   | 2.4918804   | 2.6270757   | 2.5660605   | 2.6618228   | 2.5604825   | 2.4881916   | 2.5288208   | 2.6262956   |
| "Slc6a6"   | 4.8211975   | 4.81085215  | 5.16205585  | 5.30992745  | 5.1834662   | 4.9925642   | 5.2783078   | 5.1965753   |
| "Slc6a8"   | 7.8391283   | 7.26504075  | 7.784808    | 7.9016245   | 7.6488368   | 7.2145365   | 7.7283222   | 8.1458065   |
| "Slc6a9"   | 2.8010771   | 2.8469909   | 2.8387318   | 3.0680134   | 2.83994565  | 2.75102615  | 3.18818675  | 2.89648185  |
| "Slc7a10"  | 1.8373622   | 2.0274234   | 4.1628175   | 1.7631302   | 5.925683    | 6.7308707   | 6.2833834   | 2.9513507   |
| "Slc7a11"  | 2.3870697   | 2.4369488   | 2.4289825   | 2.5017972   | 2.4304578   | 2.3943396   | 2.4180012   | 2.5234485   |
| "Slc7a13"  | 2.40292525  | 2.5605761   | 2.6131913   | 2.5268686   | 2.4608035   | 2.39737375  | 2.44378305  | 2.52091545  |
| "Slc7a2"   | 7.0264947   | 6.859767733 | 4.276510467 | 4.542477933 | 6.738791933 | 6.556110033 | 4.395202967 | 4.7706011   |
| "Slc7a5"   | 3.2241464   | 2.8674226   | 3.7316308   | 2.7840195   | 2.7826214   | 2.8781      | 2.9683037   | 2.762004    |
| "Slc7a6"   | 8.02435625  | 9.7809625   | 6.171866    | 6.1727879   | 7.9205548   | 8.573443    | 5.77595685  | 5.9082903   |
| "Slc7a7"   | 2.7004004   | 2.117844    | 2.0664182   | 1.9892094   | 2.1055422   | 3.4162323   | 2.1912618   | 1.9908675   |
| "Slc7a8"   | 5.5493546   | 6.573455    | 4.6840596   | 4.5503726   | 5.5374103   | 6.8404207   | 3.9295774   | 4.5733495   |
| "Slc8a1"   | 2.5880258   | 2.7081919   | 2.648207    | 2.795591    | 2.658213    | 2.5946805   | 2.6413238   | 2.7564676   |
| "Slc9a1"   | 7.3697147   | 8.962754    | 7.1717777   | 6.871303    | 7.942334    | 8.560747    | 7.3252373   | 6.825283    |
| "Slc9a3r1" | 6.019638    | 2.376162133 | 2.6536731   | 2.249523133 | 3.316891767 | 4.1364957   | 2.733618033 | 2.622524733 |
| "Slc9a3r2" | 4.240772483 | 4.190996583 | 4.163366517 | 4.289723617 | 4.258173217 | 4.389523483 | 4.116127767 | 4.2844482   |
| "Slc9a8"   | 4.46725165  | 5.45621515  | 4.598371    | 4.7002976   | 4.58494815  | 4.7683145   | 4.59190785  | 4.6966598   |
| "Slco1a1"  | 2.3411453   | 2.4289396   | 2.3845725   | 2.451673    | 2.3833976   | 2.3062513   | 2.377042    | 2.450888    |
| "Slco1a4"  | 7.105038    | 2.4937644   | 2.4150121   | 2.44043803  | 2.6092286   | 2.447962    | 2.4533951   | 2.4038959   |
| "Slco1b2"  | 5.902284775 | 2.757673325 | 2.842296575 | 2.787361825 | 2.695802475 | 2.60757275  | 2.6706763   | 2.782641325 |
| "Slco2a1"  | 3.878072    | 3.50326015  | 3.58067065  | 3.1010331   | 3.5369902   | 3.8412631   | 3.2056732   | 3.5222285   |
| "Slco3a1"  | 6.306477133 | 5.616994067 | 6.2912763   | 6.791262167 | 5.768765833 | 5.4912583   | 6.352406967 | 6.758394    |
| "Slco5a1"  | 6.2831764   | 5.7244186   | 7.627158    | 8.423584    | 6.928694    | 5.604145    | 7.929003    | 8.009219    |
| "Slco6b1"  | 2.4369311   | 2.4976053   | 2.4498682   | 2.538064    | 2.457037    | 2.4313588   | 2.454095    | 2.5361414   |
| "Slco6c1"  | 2.902678    | 3.113029    | 3.0066586   | 3.1936543   | 3.014528    | 2.9429579   | 2.995941    | 3.146959    |
| "Slfn2"    | 4.1237493   | 4.123551    | 4.1076427   | 3.8834972   | 4.127319    | 5.2313194   | 4.531639    | 4.0993366   |
| "Slfn3"    | 2.60248625  | 2.73142955  | 2.64092005  | 2.7644449   | 2.645265    | 2.6030069   | 2.6351358   | 2.7436711   |
| "Slfn4"    | 5.030199    | 1.9527187   | 1.9459066   | 1.9954675   | 1.9382697   | 4.332329    | 3.6156216   | 2.010939    |
| "Slfn8"    | 3.0877135   | 3.2900913   | 3.391588    | 3.2966945   | 3.2502637   | 4.80884     | 3.9899907   | 3.4886372   |
| "Slit2"    | 2.7777288   | 2.7665292   | 2.82187355  | 2.7986004   | 2.93123135  | 2.70399705  | 3.3122908   | 3.21113645  |
| "Slit3"    | 3.1412637   | 3.558923    | 3.5755246   | 3.049282    | 4.1314144   | 4.047759    | 3.6993601   | 3.0079246   |
| "Slk"      | 6.658370875 | 6.138531425 | 5.966875575 | 5.97447685  | 6.22875215  | 6.2167415   | 6.051758725 | 6.083353725 |
| "Slmap"    | 6.306694167 | 6.652015167 | 5.995753233 | 6.267834733 | 6.242719    | 6.0970316   | 6.070306    | 6.359686333 |
| "Slmo1"    | 2.3370762   | 2.4250238   | 2.377008    | 2.4418921   | 2.3798432   | 2.3517861   | 2.372439    | 2.417487    |
| "Slmo2"    | 7.906829    | 7.8308797   | 8.150252    | 8.611681    | 7.9502387   | 7.595989    | 8.649429    | 8.465526    |
| "Slm"      | 11.867102   | 8.419928    | 5.104187    | 7.063346    | 8.832644    | 7.082613    | 13.119609   | 6.300604    |
| "Slpi"     | 7.3096604   | 2.7031727   | 2.6993263   | 2.775544    | 2.8149047   | 4.178402    | 3.4588902   | 2.754374    |
| "Sltn"     | 8.234819    | 8.436867    | 8.06095     | 7.571078    | 7.846612    | 8.161798    | 7.7171125   | 7.796966    |
| "Slu7"     | 6.398788467 | 6.984940233 | 6.31302715  | 6.38316205  | 6.423779483 | 6.881699517 | 6.348648083 | 6.5644741   |
| "Smad1"    | 6.802993    | 7.315883    | 6.55088665  | 6.7289555   | 6.7881415   | 7.16380165  | 6.4611712   | 6.7532565   |
| "Smad2"    | 5.830163    | 5.7329      | 5.99511     | 6.064353    | 6.1252666   | 5.829966    | 6.371042    | 6.2458377   |
| "Smad3"    | 2.802847    | 2.9923694   | 2.9550602   | 3.1904738   | 2.9205408   | 2.8141875   | 2.9546452   | 3.1758697   |
| "Smad4"    | 10.14263233 | 11.10749    | 10.32415867 | 10.47748367 | 10.682514   | 10.95121817 | 10.194416   | 10.53032483 |
| "Smad5"    | 4.9106162   | 5.94255285  | 5.3710918   | 5.47258925  | 5.43904845  | 6.0474532   | 5.31617165  | 5.3320091   |
| "Smad6"    | 5.4207845   | 3.9959288   | 5.053146    | 4.93171     | 5.138115    | 4.8632116   | 4.8477526   | 4.9096665   |
| "Smad7"    | 5.770384    | 5.4945674   | 5.371739    | 5.193824    | 5.1249566   | 5.2252502   | 5.007534    | 5.2428827   |
| "Smagp"    | 5.3988714   | 4.032301    | 4.492669    | 4.145479    | 4.2497606   | 5.342329    | 4.406736    | 4.3495793   |
| "Smap1"    | 5.3950306   | 5.4237776   | 5.428712267 | 5.5149581   | 5.271931633 | 5.650851733 | 5.401378    | 5.483884833 |
| "Smap2"    | 4.2341075   | 3.4119835   | 4.261902    | 3.8058155   | 3.3010306   | 4.693923    | 3.9123988   | 3.8068087   |
| "Smarca1"  | 1.9957036   | 2.3354917   | 3.117572    | 3.5344942   | 3.8630054   | 2.1206315   | 2.7524304   | 2.8900719   |
| "Smarca2"  | 6.9823678   | 6.851451    | 7.215678    | 7.237365    | 7.395826    | 6.8422086   | 7.01598765  | 7.1084972   |
| "Smarca4"  | 7.52440615  | 7.81628185  | 7.722538    | 7.73533485  | 7.47416215  | 7.5922365   | 7.771455    | 7.785295    |
| "Smarca5"  | 8.656414    | 9.079804667 | 8.4976355   | 8.405258667 | 8.639948333 | 9.028107333 | 8.491428333 | 8.771713333 |
| "Smarcad1" | 4.98431315  | 5.62700745  | 5.1713267   | 5.019784    | 5.2383073   | 5.54164995  | 4.92875     | 4.9588299   |
| "Smarcal1" | 7.513053    | 8.248419    | 7.8915396   | 7.732699    | 7.544899    | 7.7153506   | 7.6946373   | 7.7252297   |
| "Smarcb1"  | 4.6325245   | 4.97710535  | 5.18046725  | 5.03509635  | 5.0429025   | 5.21526785  | 5.2307038   | 4.9614893   |
| "Smarcc1"  | 5.3234534   | 5.6185205   | 6.24284055  | 6.0339985   | 5.88192215  | 5.6853715   | 5.9991091   | 5.733173    |
| "Smarcd1"  | 2.3006666   | 2.3234277   | 2.2800455   | 2.380286    | 2.416605    | 2.3360915   | 2.1172972   | 2.370014    |
| "Smarcd2"  | 5.106922    | 5.416192067 | 5.7724625   | 5.532880467 | 5.910853533 | 5.831870267 | 5.715965767 | 5.5819846   |
| "Smarcd3"  | 9.349017    | 10.028803   | 10.65947    | 10.479889   | 9.603563    | 9.13003     | 9.908159    | 10.183616   |
| "Smarcel1" | 7.65685215  | 8.07745955  | 8.0421102   | 7.8977087   | 7.8388598   | 8.0580668   | 8.1196452   | 7.9722075   |
| "Smc1a"    | 5.430952533 | 5.2010144   | 5.236803767 | 5.011195    | 5.137565667 | 5.6036539   | 5.0544952   | 5.336651    |
| "Smc2"     | 3.6880107   | 3.4826899   | 4.0037165   | 3.5262587   | 3.636248    | 4.860079    | 4.0305605   | 3.8269699   |
| "Smc3"     | 5.04407415  | 5.3252013   | 5.05355135  | 4.96183575  | 5.31091435  | 5.3085443   | 5.0034935   | 5.16204     |
| "Smc4"     | 6.570945833 | 6.799548767 | 6.5408678   | 6.583260667 | 6.7842933   | 7.7222299   | 6.623286933 | 6.899966533 |
| "Smc5"     | 6.8476038   | 7.17670215  | 6.3064208   | 6.84781695  | 7.0284624   | 6.95275     | 6.96969835  | 7.102971    |
| "Smc6"     | 6.17323886  | 6.45993462  | 7.06187494  | 7.06526976  | 6.70661946  | 6.3398427   | 6.797206    | 7.04039246  |
| "Smcp"     | 2.4286184   | 2.5028055   | 2.4698222   | 2.5888748   | 2.4847524   | 2.4377959   | 2.484195    | 2.5517032   |
| "Smek1"    | 6.8383293   | 7.1759505   | 6.289814    | 6.1666875   | 6.6164155   | 6.956512    | 6.520003    | 6.4963193   |
| "Smek2"    | 6.7425972   | 7.03770685  | 6.788825275 | 6.926981425 | 6.855670625 | 7.1509045   | 6.935419075 | 7.007214025 |
| "Smg5"     | 4.9016822   | 5.3866807   | 5.239623    | 5.2828841   | 5.16554     | 5.4971542   | 5.21942725  | 5.35053725  |
| "Smg6"     | 2.951992    | 3.0184283   | 3.0195048   | 3.0863163   | 3.020687    | 3.0002043   | 3.0190482   | 3.0503864   |
| "Smn1"     | 2.4487476   | 2.5275576   | 2.474186    | 2.554146    | 2.4974124   | 2.711262    | 2.4411871   | 2.5526419   |
| "Smndc1"   | 8.643069    | 9.010475    | 8.224923    | 8.378065    | 8.6132945   | 9.0207985   | 8.325186    | 8.569406    |

|            |             |             |             |             |             |             |             |             |
|------------|-------------|-------------|-------------|-------------|-------------|-------------|-------------|-------------|
| "Smo"      | 2.9413105   | 2.7965702   | 4.33669255  | 3.0982046   | 3.44433645  | 3.12664165  | 3.1539804   | 3.25782665  |
| "Smoc1"    | 5.2399826   | 3.3592663   | 3.8831377   | 3.1840563   | 6.8901143   | 5.8755574   | 5.8473077   | 3.5701005   |
| "Smoc2"    | 7.4058603   | 7.2594212   | 8.58953125  | 8.62939265  | 7.7229945   | 7.3748138   | 8.07333325  | 8.3327925   |
| "Smox"     | 6.8046823   | 9.647254    | 9.467268    | 11.461125   | 8.626986    | 9.424444    | 7.9933004   | 9.790191    |
| "Smpd1"    | 8.767423    | 0.979041    | 9.133838    | 9.170955    | 8.834723    | 8.387329    | 8.928698    | 9.110751    |
| "Smpd2"    | 6.556497    | 6.374097    | 6.441777    | 6.379142    | 6.6684303   | 6.436604    | 6.0278544   | 6.4429917   |
| "Smpd3"    | 3.2524393   | 3.5416658   | 3.4388542   | 3.5169446   | 3.4582422   | 3.4014313   | 3.4302895   | 3.5223477   |
| "Smpd4"    | 3.407156067 | 3.605954033 | 3.4249206   | 3.579326333 | 3.505039933 | 3.4865973   | 3.4972984   | 3.638776767 |
| "Smpd13a"  | 10.718032   | 10.859581   | 10.877924   | 10.670399   | 11.032544   | 10.7305765  | 10.822179   | 10.710251   |
| "Smpd13b"  | 2.6280541   | 2.6618874   | 2.7701087   | 3.3840568   | 2.720713    | 2.638561    | 2.6884778   | 2.7218437   |
| "Smpx"     | 13.392687   | 13.079452   | 13.282894   | 13.606498   | 13.309761   | 13.046276   | 13.575816   | 13.579113   |
| "Smr2"     | 8.751997    | 9.478431    | 9.882437    | 10.790213   | 9.386336    | 9.025241    | 9.64524     | 10.296569   |
| "Smr3a"    | 2.3205364   | 2.4039817   | 2.3567748   | 2.465847    | 2.3600109   | 2.3188004   | 2.3552246   | 2.4508967   |
| "Smtn"     | 4.983184    | 4.4790444   | 6.9800315   | 6.4620457   | 5.2305684   | 4.103605    | 6.5902133   | 6.2385513   |
| "Smtnl1"   | 8.605531    | 7.2559886   | 7.737373    | 8.769       | 8.9655695   | 7.627887    | 8.693606    | 8.821248    |
| "Smu1"     | 6.589664833 | 6.9175156   | 6.4303349   | 6.543167433 | 6.682556667 | 6.891583733 | 6.568764433 | 6.6014184   |
| "Smyd1"    | 5.9703996   | 6.253004767 | 6.538738533 | 6.768413267 | 6.179744633 | 5.900288067 | 6.313136567 | 6.401656    |
| "Smyd2"    | 12.117339   | 12.853966   | 12.51864    | 12.609799   | 11.81776    | 11.47939    | 12.319165   | 11.948226   |
| "Smyd5"    | 3.5553973   | 3.1750808   | 2.9615536   | 3.0047138   | 2.877347    | 2.8267338   | 2.945539    | 3.0038342   |
| "Snai2"    | 3.1606548   | 3.4746854   | 3.3208728   | 3.7078896   | 3.323059    | 3.2129338   | 3.2651412   | 3.4613388   |
| "Snai3"    | 2.087403    | 2.126033    | 2.1028466   | 2.1718302   | 2.5284448   | 2.0941923   | 2.1025329   | 2.1725028   |
| "Snap23"   | 7.153875967 | 6.584798733 | 7.5830212   | 7.480464733 | 7.078741833 | 6.902388667 | 7.4627939   | 7.864996    |
| "Snap25"   | 2.6253576   | 2.7228184   | 2.6462588   | 2.7946606   | 2.6573718   | 2.603693    | 2.6511648   | 2.7522004   |
| "Snap29"   | 4.084702733 | 5.4896125   | 4.075044167 | 4.3584365   | 4.4396635   | 5.201720533 | 4.372711333 | 4.1605063   |
| "Snap47"   | 8.3621305   | 7.6834295   | 8.1745195   | 8.33198515  | 8.047992    | 7.57277585  | 8.32123415  | 8.167329    |
| "Snapc2"   | 5.26602255  | 5.10847615  | 5.72716355  | 5.5470248   | 5.410655    | 5.39865935  | 5.42659275  | 5.50891065  |
| "Snapc3"   | 5.112061567 | 5.2591273   | 5.180917    | 5.145372467 | 5.016128667 | 5.440956633 | 5.354423    | 5.415258433 |
| "Snapc5"   | 2.591021    | 2.8101184   | 2.6703138   | 2.8407607   | 2.6810431   | 2.6336799   | 2.6658795   | 2.792644    |
| "Snapiin"  | 8.0282025   | 8.7803623   | 8.4565157   | 8.498963    | 8.111788    | 8.24546125  | 8.35030815  | 8.32549235  |
| "Snca"     | 4.011693467 | 3.9090198   | 3.504785533 | 3.7890161   | 3.973152    | 4.3013643   | 3.676602133 | 4.429287567 |
| "Sncaip"   | 3.387911    | 3.79893865  | 3.62443225  | 3.81546575  | 3.689585    | 3.7436667   | 3.59672405  | 3.8502234   |
| "Sncb"     | 2.5153034   | 2.661086    | 2.5662713   | 2.6027915   | 2.5739357   | 2.5371492   | 2.5692327   | 2.6052094   |
| "Sncg"     | 5.5948772   | 5.616704    | 8.334227    | 6.230295    | 8.770571    | 6.2623563   | 6.9570947   | 6.795679    |
| "Snd1"     | 3.908946533 | 3.850493867 | 3.890354533 | 3.821914067 | 3.873961767 | 3.786636633 | 3.819759967 | 3.815839167 |
| "Snf8"     | 7.434362    | 7.775548    | 8.03821     | 8.054853    | 7.3107686   | 7.3850284   | 7.9265556   | 7.8467526   |
| "Snhg1"    | 8.3622112   | 9.73477696  | 6.5357109   | 6.50613104  | 8.32909204  | 8.90769314  | 6.51355088  | 6.61610482  |
| "Snhg11"   | 3.2170217   | 3.2288325   | 3.9566505   | 3.179361    | 4.073441    | 3.9423451   | 4.806942    | 3.8056896   |
| "Snhg5"    | 8.960137    | 10.652838   | 7.8327928   | 7.6536436   | 9.370475    | 10.139088   | 7.0526657   | 8.089015    |
| "Snhg6"    | 10.698581   | 11.645872   | 10.139014   | 10.259446   | 10.88294    | 11.181997   | 10.032588   | 10.404681   |
| "Snhg8"    | 9.829032    | 11.553703   | 9.927354    | 9.958291    | 10.350649   | 10.708776   | 9.718769    | 10.175582   |
| "Snip1"    | 5.5131464   | 6.5187273   | 5.593301    | 5.08786     | 5.9170914   | 6.5650325   | 5.3718653   | 5.177098    |
| "Snord116" | 3.2159276   | 3.477664    | 3.4087148   | 3.5490484   | 3.4168372   | 3.2817805   | 3.407952    | 3.6196463   |
| "Snrk"     | 8.7006835   | 8.8681435   | 8.813169    | 9.0431115   | 9.402395    | 9.444752    | 8.933584    | 9.026302    |
| "Snrnp25"  | 6.3004446   | 6.3415647   | 6.779274    | 6.8816757   | 6.1455817   | 5.928932    | 7.013953    | 6.98306     |
| "Snrnp27"  | 10.606435   | 10.7744765  | 10.932282   | 10.832126   | 10.57225125 | 10.5555265  | 11.1245385  | 10.7610895  |
| "Snrnp40"  | 7.0439966   | 7.8920328   | 7.3238134   | 7.59675525  | 7.659421    | 7.9125557   | 7.470927    | 7.55865475  |
| "Snrnp48"  | 5.845597975 | 6.561076175 | 6.1692636   | 6.231725875 | 6.46188415  | 6.7934518   | 6.304467175 | 6.33750185  |
| "Snrnp70"  | 7.474043    | 7.747972    | 7.79023     | 7.322782    | 7.5664625   | 8.219128    | 7.555524    | 7.4053206   |
| "Snrpa1"   | 8.1039759   | 8.746251167 | 8.126786667 | 8.343970667 | 8.528539333 | 8.499305667 | 8.10395     | 8.357296867 |
| "Snrpb"    | 10.318658   | 10.944804   | 10.901261   | 10.901156   | 10.721136   | 10.775426   | 10.388366   | 10.789723   |
| "Snrpb2"   | 6.883847367 | 7.453513567 | 6.9113939   | 6.9814396   | 7.053321267 | 7.158337433 | 7.010643067 | 6.9838835   |
| "Snrpc"    | 7.922271    | 8.233036    | 8.379651    | 8.341326    | 7.9097643   | 8.008953    | 8.1025305   | 8.221295    |
| "Snrpd2"   | 11.213371   | 11.383025   | 11.623496   | 11.496201   | 11.343189   | 11.031015   | 11.780246   | 11.431649   |
| "Snrpd3"   | 6.52373035  | 6.37424675  | 6.74175485  | 6.7892242   | 6.257153    | 6.2576741   | 6.48164575  | 6.979       |
| "Snrpe"    | 11.50263    | 11.387579   | 11.511694   | 11.524555   | 11.41733    | 11.294701   | 11.761838   | 11.519553   |
| "Snrpg"    | 9.7767435   | 10.0948155  | 9.920031    | 9.660243    | 9.919488    | 10.03297    | 10.128308   | 9.6810125   |
| "Snrpn"    | 5.59267038  | 5.99732714  | 6.19845012  | 6.39954648  | 6.17853928  | 5.90110108  | 5.62445994  | 6.33508404  |
| "Snta1"    | 10.204624   | 11.041174   | 9.945115    | 10.218804   | 10.322359   | 10.11091    | 10.170149   | 9.765673    |
| "Sntb1"    | 2.3764865   | 2.5483255   | 2.4746869   | 2.5483823   | 2.4751008   | 2.3842287   | 2.4739795   | 2.53829     |
| "Sntb2"    | 2.919780825 | 3.0301064   | 3.24899955  | 3.294891125 | 3.01795585  | 2.98165415  | 3.01188235  | 3.175627025 |
| "Sntg2"    | 2.9397695   | 3.125145    | 2.956962    | 3.1196525   | 3.0103602   | 2.9978728   | 2.9837008   | 3.0977333   |
| "Snw1"     | 8.60152325  | 9.326833    | 8.396342    | 8.5587365   | 8.7573125   | 9.01695625  | 8.72422     | 8.5887385   |
| "Snx1"     | 5.4676504   | 6.5160093   | 6.4248657   | 6.4165983   | 6.2879143   | 6.6402617   | 6.0212007   | 6.1397185   |
| "Snx10"    | 7.2273035   | 6.1104193   | 6.3432975   | 6.2919083   | 6.714116    | 7.343539    | 7.018449    | 5.766082    |
| "Snx11"    | 2.759241    | 3.2155826   | 2.9390314   | 2.967041    | 2.9389122   | 2.9997547   | 2.8348625   | 3.0076807   |
| "Snx12"    | 6.0749653   | 6.5371352   | 6.39238825  | 6.06133695  | 6.30133385  | 6.212852    | 6.4224808   | 6.1751103   |
| "Snx14"    | 6.5879965   | 6.00152     | 6.7653375   | 6.7126927   | 6.6347275   | 6.592157    | 6.6254134   | 6.8222094   |
| "Snx15"    | 5.919665    | 6.1158605   | 6.352127    | 6.334662    | 5.877888    | 6.2849503   | 5.7422633   | 6.064259    |
| "Snx16"    | 6.229183    | 6.5998983   | 5.7833686   | 6.014874    | 6.0003905   | 6.1020155   | 6.0287814   | 6.4589853   |
| "Snx17"    | 9.8208685   | 10.368405   | 10.52166    | 10.470116   | 10.344037   | 10.662029   | 10.330671   | 10.302558   |
| "Snx18"    | 5.21619115  | 4.9330725   | 5.6003345   | 5.1610373   | 5.1323937   | 5.27852365  | 5.13168475  | 5.17930925  |
| "Snx19"    | 6.30902185  | 6.900988    | 6.3469595   | 6.56450275  | 6.3740897   | 6.46159615  | 6.1931181   | 6.46252565  |
| "Snx2"     | 9.421607    | 9.498249    | 9.561497    | 9.377127    | 9.832233    | 10.112886   | 9.7715225   | 9.451191    |
| "Snx21"    | 4.8570676   | 4.8244457   | 5.0699015   | 5.330464    | 4.953597    | 4.9450116   | 5.530279    | 4.9866056   |
| "Snx3"     | 11.175295   | 10.974722   | 11.706593   | 11.599747   | 11.226581   | 10.962003   | 11.943827   | 11.471189   |
| "Snx30"    | 2.4378724   | 2.5019877   | 2.51533     | 2.5400882   | 2.4828453   | 2.4665463   | 2.4610012   | 2.5320444   |
| "Snx4"     | 6.9606605   | 6.8759165   | 7.3376513   | 7.269724    | 7.2192593   | 7.205892    | 7.401098    | 7.331152    |
| "Snx5"     | 7.57888324  | 7.86844216  | 7.74783964  | 7.77270376  | 7.57441534  | 8.12673314  | 7.97940582  | 7.8391849   |
| "Snx6"     | 5.891398767 | 6.057600333 | 6.2545627   | 6.260588    | 6.182660333 | 5.9408669   | 6.4600562   | 6.238268367 |
| "Snx9"     | 6.1042908   | 6.33140465  | 6.93612935  | 6.71363985  | 6.58703785  | 6.51878385  | 6.66611215  | 6.7004539   |
| "Soat1"    | 3.47856195  | 2.618296925 | 3.195670425 | 2.8299903   | 2.986195975 | 3.878591725 | 3.2868491   | 2.9307106   |

|           |             |             |             |             |             |             |             |             |
|-----------|-------------|-------------|-------------|-------------|-------------|-------------|-------------|-------------|
| "Soat2"   | 2.357118    | 2.3974953   | 2.3481696   | 2.4542391   | 2.3529608   | 2.337154    | 2.3446984   | 2.4300134   |
| "Sobp"    | 4.9551773   | 6.070199    | 7.2238994   | 7.6499443   | 4.8753347   | 3.8880649   | 8.012357    | 6.945806    |
| "Socs2"   | 10.349647   | 10.472242   | 7.18008575  | 8.2204855   | 9.38411     | 10.0159815  | 8.326246    | 7.540393    |
| "Socs3"   | 5.513139667 | 3.725037767 | 4.5669036   | 4.718763133 | 3.9729845   | 4.3281275   | 4.985281233 | 4.492579033 |
| "Socs4"   | 3.02003065  | 3.0352724   | 2.9132443   | 3.07334505  | 2.9286866   | 2.8770448   | 2.8952413   | 2.99731515  |
| "Socs5"   | 4.5145708   | 4.4576594   | 5.0776554   | 5.36536365  | 5.01570735  | 4.6696741   | 5.274205    | 5.5133805   |
| "Socs6"   | 5.55006075  | 6.0130325   | 5.539974    | 5.9914703   | 5.4066801   | 5.28595925  | 5.7982378   | 5.896322    |
| "Sod1"    | 9.25416735  | 9.0630723   | 9.0914875   | 9.0906905   | 9.1108165   | 9.058448    | 9.3991615   | 9.0487785   |
| "Sod2"    | 8.9661756   | 8.675831267 | 9.0877564   | 9.474145333 | 9.111794767 | 8.7260574   | 9.146088233 | 9.723913567 |
| "Solh"    | 5.114000133 | 5.5998098   | 4.3882513   | 4.518747067 | 5.085082167 | 5.342495833 | 4.631513833 | 4.5443683   |
| "Son"     | 6.57226755  | 7.03696685  | 6.2877801   | 6.276472783 | 6.636714617 | 6.76797285  | 6.38917735  | 6.423233417 |
| "Sorbs1"  | 9.8071175   | 8.5014985   | 8.5090395   | 8.51113935  | 10.023616   | 9.185827    | 9.6803645   | 9.32002465  |
| "Sorbs3"  | 6.5795593   | 7.513184    | 5.1169043   | 5.295662    | 6.5744023   | 7.1083355   | 5.3243656   | 5.2620783   |
| "Sorcs1"  | 2.3194995   | 2.377081    | 2.338867    | 2.4382772   | 2.3393762   | 2.3158183   | 2.3367722   | 2.43188     |
| "Sorcs2"  | 3.5627782   | 3.6637642   | 3.9470265   | 3.9053135   | 3.7641547   | 3.4534721   | 3.6152935   | 3.7357876   |
| "Sorcs3"  | 2.3160331   | 2.4308617   | 2.7921827   | 2.452528    | 2.3744862   | 2.3411815   | 2.3635724   | 2.42854     |
| "Sord"    | 8.6779935   | 6.14704375  | 7.0748387   | 7.3919382   | 6.828066    | 6.3946045   | 7.5031885   | 7.60069725  |
| "Sorl1"   | 5.3051135   | 6.1370318   | 5.8643586   | 6.61503165  | 5.5947681   | 5.85649685  | 5.98530385  | 5.9461715   |
| "Sort1"   | 5.0425404   | 5.58599105  | 5.56656015  | 5.2963537   | 5.75811225  | 5.4557186   | 5.661889    | 5.50326315  |
| "Sosl1"   | 2.8238693   | 2.959576267 | 2.8838548   | 2.9930938   | 2.9266652   | 2.8265234   | 2.871699167 | 2.957118933 |
| "Sos2"    | 9.179861    | 9.535607    | 10.1306505  | 10.643297   | 9.804777    | 9.274171    | 10.016424   | 10.677886   |
| "Sost"    | 2.7884946   | 2.9535236   | 2.819378    | 2.920014    | 2.8228216   | 2.7849672   | 2.8185825   | 2.9102783   |
| "Sostdc1" | 3.294456    | 3.6282988   | 4.680377    | 3.47656     | 3.3587224   | 3.2792935   | 3.8474445   | 3.4670444   |
| "Sowaha"  | 2.9411163   | 3.2378035   | 3.0436594   | 3.2350826   | 3.046924    | 2.9764047   | 3.0375328   | 3.1781201   |
| "Sowahc"  | 5.1261253   | 5.0971904   | 5.4249535   | 5.12872     | 6.6631775   | 7.797819    | 7.49717     | 5.5183945   |
| "Sox10"   | 2.56026105  | 2.8774752   | 3.048583    | 3.36213755  | 3.20397675  | 2.9158232   | 2.9827833   | 2.9562629   |
| "Sox11"   | 2.6102118   | 2.6132855   | 2.5392976   | 2.6574035   | 2.5484264   | 2.4943118   | 2.6757824   | 2.6611366   |
| "Sox12"   | 2.2093754   | 2.3893046   | 2.3983858   | 2.6224983   | 2.3921707   | 2.3828287   | 2.3916037   | 2.4354005   |
| "Sox13"   | 3.9532194   | 4.4889708   | 4.2004595   | 4.68384     | 4.4627533   | 4.78615     | 4.4584107   | 4.4953465   |
| "Sox15"   | 3.1348646   | 3.3850272   | 3.2879348   | 3.4560146   | 3.3023324   | 3.2342596   | 3.297175    | 3.4371297   |
| "Sox17"   | 6.33146015  | 6.00377225  | 5.43885995  | 5.60253285  | 6.0114436   | 6.34282075  | 5.6003685   | 5.680591    |
| "Sox18"   | 5.42364     | 6.344501    | 6.8534083   | 6.0763383   | 5.921539    | 7.5108676   | 6.6778264   | 5.706088    |
| "Sox2"    | 2.5993724   | 2.7949538   | 2.664194    | 2.7929163   | 2.6740913   | 2.606728    | 2.6587982   | 2.8034415   |
| "Sox3"    | 2.6307878   | 2.7790565   | 2.6929255   | 2.8551323   | 2.7076569   | 2.6392295   | 2.6919882   | 2.8163068   |
| "Sox4"    | 5.69988898  | 8.30970242  | 3.75997844  | 3.51274356  | 4.96370558  | 7.68488     | 4.17007398  | 3.58375458  |
| "Sox5"    | 2.84611685  | 3.042647    | 2.86827875  | 2.93393005  | 2.86678335  | 2.85340705  | 2.8401959   | 2.91914765  |
| "Sox6"    | 7.2547495   | 8.591811    | 7.6816      | 8.2104354   | 7.59455685  | 7.556087    | 7.8403977   | 7.6862375   |
| "Sox7"    | 3.6905484   | 2.5682907   | 4.3615603   | 4.4173355   | 3.9324858   | 3.976039    | 4.020202    | 4.74682     |
| "Sox9"    | 2.9022944   | 2.815009    | 2.79271765  | 2.906862    | 2.81384815  | 2.6427331   | 2.77489645  | 2.8739308   |
| "Sp1"     | 5.7098585   | 5.9747561   | 5.4268209   | 5.348387    | 5.68258825  | 5.908555    | 5.4308071   | 5.4810841   |
| "Sp100"   | 2.9729173   | 2.9817626   | 2.929091    | 3.082805    | 2.979186    | 3.18489     | 3.225326    | 3.1082335   |
| "Sp110"   | 2.254032    | 2.321241    | 2.397983    | 2.377081    | 2.287974    | 2.255897    | 2.3003178   | 2.3694232   |
| "Sp2"     | 3.9350011   | 5.021589    | 3.8509874   | 3.9817998   | 3.9268596   | 3.8039336   | 3.895964    | 3.977007    |
| "Sp3"     | 8.292553    | 8.359667    | 8.386644    | 8.200638    | 8.432374    | 8.565975    | 8.299966    | 8.60458     |
| "Sp4"     | 4.11208595  | 5.31774115  | 4.1516264   | 4.38487475  | 4.7599578   | 4.32492015  | 4.1192852   | 4.32929525  |
| "Sp7"     | 2.8704865   | 3.1488664   | 2.9721267   | 3.161494    | 2.9853048   | 2.9018323   | 2.9658418   | 3.1156976   |
| "Spa17"   | 5.2062817   | 5.8229756   | 5.885769    | 6.2622123   | 5.6924376   | 5.287555    | 6.0942807   | 5.631828    |
| "Spag1"   | 2.9262342   | 2.9753766   | 2.9663217   | 3.0407913   | 2.916713    | 2.9480736   | 2.9683328   | 3.0348835   |
| "Spag5"   | 2.65296125  | 2.6528448   | 2.6055195   | 2.6773199   | 2.5811675   | 2.50183565  | 2.6082485   | 2.6865008   |
| "Spag7"   | 10.023798   | 10.275756   | 10.239103   | 10.61188    | 10.233121   | 9.911121    | 10.238518   | 10.48779    |
| "Spam1"   | 2.288134    | 2.3703222   | 2.3161368   | 2.425785    | 2.3269324   | 2.2905722   | 2.3139687   | 2.416469    |
| "Sparc"   | 10.156616   | 9.6151685   | 12.5519265  | 10.962451   | 11.3969815  | 10.9434755  | 10.551827   | 11.4725025  |
| "Sparcl1" | 10.466958   | 10.294038   | 11.380923   | 11.26103    | 11.066218   | 10.436527   | 11.096955   | 11.636208   |
| "Spast"   | 8.37933625  | 8.05122325  | 9.091274    | 9.1606375   | 8.3305055   | 7.8896097   | 9.262411    | 9.1635145   |
| "Spata13" | 5.0480003   | 2.9946215   | 3.5682607   | 3.6178927   | 3.503734    | 4.7123947   | 3.575364    | 3.7615519   |
| "Spata4"  | 2.5455842   | 2.6898131   | 2.643802    | 2.7439191   | 2.6389303   | 2.6171608   | 2.6403978   | 2.7227626   |
| "Spata5"  | 5.1746319   | 6.155540467 | 4.8944625   | 5.043852333 | 5.3170665   | 5.248685833 | 5.064798333 | 5.123996733 |
| "Spata6"  | 2.9585315   | 2.97801935  | 2.93555145  | 2.86866245  | 2.97813155  | 3.07779215  | 2.98326365  | 2.9922691   |
| "Spats2"  | 3.6727266   | 3.1259549   | 4.037589    | 3.863153    | 3.6714013   | 3.701122    | 3.9576397   | 4.1217613   |
| "Spats2l" | 3.147902    | 3.2235923   | 3.2358987   | 3.502638    | 3.2446244   | 3.0482755   | 3.4789174   | 3.3808253   |
| "Spc25"   | 2.433391    | 2.5383525   | 2.4397485   | 2.5855513   | 2.4440498   | 2.399644    | 2.4265196   | 2.5047007   |
| "Spcs1"   | 8.317389667 | 8.3428764   | 8.502014833 | 8.510688167 | 8.337528667 | 8.197790233 | 8.549857833 | 8.5024523   |
| "Spcs2"   | 9.2163375   | 9.5803685   | 9.580002    | 9.2740995   | 9.6808645   | 9.575103    | 9.7286735   | 9.19401575  |
| "Spcs3"   | 8.116492    | 8.634745    | 8.573919    | 8.621978    | 8.522123    | 8.86328     | 8.6104965   | 8.593166    |
| "Spdef"   | 2.3587973   | 2.4184687   | 2.39315     | 2.4523447   | 2.3897088   | 2.3411016   | 2.370211    | 2.488873    |
| "Speccl1" | 2.6718936   | 2.7428806   | 3.0985096   | 2.765393    | 2.6738765   | 2.6483552   | 2.6771195   | 2.7624068   |
| "Speer3"  | 3.4133265   | 3.6716976   | 3.4611208   | 3.5318043   | 3.4856267   | 3.4090047   | 3.4568899   | 3.5526223   |
| "Speer4a" | 2.47085     | 2.602628    | 2.5337896   | 2.691405    | 2.543727    | 2.4796047   | 2.533945    | 2.6711044   |
| "Speg"    | 6.066569025 | 6.1282623   | 6.508262825 | 6.716510525 | 5.992720375 | 5.3632915   | 6.5348296   | 6.67686075  |
| "Spen"    | 4.327669    | 5.253447    | 3.8937738   | 4.0446615   | 4.0655065   | 4.7837934   | 3.97571     | 4.0601287   |
| "Spert"   | 2.5659206   | 2.6741354   | 2.6503575   | 2.6963136   | 2.6479497   | 2.6338623   | 2.6482222   | 2.6958838   |
| "Spespl1" | 2.4392178   | 2.5277085   | 2.482896    | 2.5930805   | 2.4862115   | 2.4414392   | 2.4800262   | 2.5761788   |
| "Spg20"   | 6.021054133 | 5.787185133 | 5.751506467 | 6.0682291   | 5.965528133 | 5.5169028   | 5.963474067 | 6.186206133 |
| "Spg21"   | 7.276132    | 7.263375    | 7.17172     | 6.463539    | 7.8311415   | 8.061973    | 8.018391    | 6.8552823   |
| "Spg7"    | 7.5049376   | 8.125093    | 7.821197    | 8.11771     | 7.816093    | 7.602656    | 7.847378    | 7.9912558   |
| "Sphk2"   | 3.6528398   | 4.0868334   | 3.67536885  | 3.7495226   | 3.9170532   | 3.77459185  | 3.8710874   | 3.5722139   |
| "Spi16"   | 2.503007    | 2.621552    | 2.5532832   | 2.633082    | 2.5582962   | 2.5010188   | 2.5558352   | 2.6383862   |
| "Spib"    | 1.9907975   | 2.0345793   | 2.0176125   | 2.0752273   | 2.016317    | 5.5944834   | 2.0126748   | 2.0763226   |
| "Spic"    | 2.763808    | 2.94737305  | 2.82898475  | 2.96701275  | 2.8426971   | 3.096012    | 2.81175625  | 2.9042636   |
| "Spice1"  | 6.1514342   | 6.5851505   | 6.380804    | 5.562318    | 6.54967465  | 6.5397565   | 5.43933085  | 6.0362411   |
| "Spin1"   | 7.31296035  | 6.937450675 | 6.4824053   | 6.751071725 | 6.540322675 | 7.033931125 | 6.877851125 | 6.647317875 |

|             |             |             |             |             |             |             |             |             |
|-------------|-------------|-------------|-------------|-------------|-------------|-------------|-------------|-------------|
| "Spin4"     | 3.095242    | 3.1479611   | 3.1307805   | 3.3036203   | 3.094312    | 3.0927448   | 3.1272035   | 3.2374935   |
| "Spink3"    | 2.3110042   | 2.415741    | 2.3475099   | 2.48207     | 2.350967    | 2.3092887   | 2.3457506   | 2.4426436   |
| "Spink4"    | 2.40538     | 2.5355778   | 2.4172285   | 2.5778518   | 2.4184697   | 2.383566    | 2.381343    | 2.5011542   |
| "Spint2"    | 5.9260972   | 3.92217225  | 4.8564596   | 4.52988815  | 4.31068155  | 5.2119144   | 4.5523083   | 4.0395173   |
| "Spna1"     | 2.3328178   | 2.3780155   | 2.3381264   | 2.4300284   | 2.3341482   | 2.3274374   | 2.3308158   | 2.4281328   |
| "Spna2"     | 8.59470135  | 8.0133575   | 7.928037    | 7.7533734   | 8.4368022   | 8.5822193   | 8.172366    | 7.96679135  |
| "Sbnb1"     | 2.8681371   | 3.50018     | 3.160876    | 3.2328138   | 3.101514    | 3.1273959   | 3.5577443   | 3.1871367   |
| "Sbnb2"     | 8.049636325 | 7.79783435  | 7.967030075 | 7.796717575 | 8.161319    | 8.360539    | 8.26175075  | 8.06468775  |
| "Sbnb3"     | 2.651538    | 2.7157047   | 2.8344743   | 2.7444344   | 2.6711316   | 2.651801    | 2.6666641   | 2.7076755   |
| "Spns1"     | 5.797948    | 6.316205    | 5.9787335   | 5.95886     | 6.0358224   | 6.1420293   | 5.7865777   | 5.9556246   |
| "Spns2"     | 9.173196    | 10.782089   | 8.706694    | 9.4954195   | 9.9916115   | 10.614478   | 8.760661    | 8.916082    |
| "Spock2"    | 2.551503    | 3.3452085   | 2.47634135  | 2.56560745  | 2.49888015  | 2.4682836   | 2.4699564   | 2.53750455  |
| "Spock3"    | 2.9656832   | 3.2889426   | 3.2199023   | 3.3382788   | 3.1419199   | 3.0517366   | 3.1222227   | 3.298229    |
| "Spon1"     | 4.1760038   | 4.7306957   | 5.80425945  | 4.78307     | 6.3139493   | 5.9243705   | 4.43701185  | 4.6460722   |
| "Spon2"     | 3.0747278   | 3.3810856   | 4.5470047   | 3.4341533   | 3.3278432   | 3.3152964   | 3.2735908   | 3.4066238   |
| "Spop"      | 9.9573725   | 10.24813775 | 11.1133155  | 10.7747395  | 10.115353   | 10.158748   | 10.5562435  | 10.81505    |
| "Spp1"      | 7.981548    | 5.6384525   | 6.829416    | 6.0093427   | 7.9893394   | 6.507913    | 8.378106    | 6.867236    |
| "Spp2"      | 6.499166    | 2.3054895   | 2.3270683   | 2.3697524   | 2.2978659   | 2.235313    | 2.296967    | 2.3574486   |
| "Sspl3"     | 6.32620095  | 7.02674615  | 6.767102    | 6.2059702   | 6.6188472   | 6.6453088   | 6.32556965  | 6.02049365  |
| "Spr"       | 7.28024     | 6.2875195   | 7.4760413   | 7.460151    | 7.21509     | 6.6661453   | 7.289089    | 7.437134    |
| "Spred1"    | 4.794348    | 4.926790567 | 5.358151667 | 5.2399524   | 5.205536867 | 5.135017    | 5.2450222   | 5.377425833 |
| "Spred2"    | 4.24630255  | 4.3652619   | 4.49239535  | 4.7285385   | 4.49785505  | 4.4940896   | 4.4046811   | 4.71386875  |
| "Sprr1a"    | 2.5832472   | 2.6298304   | 2.6157413   | 2.7910016   | 2.61383     | 2.548967    | 2.6040182   | 2.7510772   |
| "Sprr1b"    | 2.365275    | 2.45749     | 2.4054623   | 2.5199153   | 2.4071975   | 2.364747    | 2.4039288   | 2.506927    |
| "Sprr2a1"   | 2.0715818   | 2.1455662   | 2.3799796   | 2.2075806   | 2.116473    | 2.0850275   | 2.1029196   | 2.1946197   |
| "Sprr2e"    | 2.4274552   | 2.4781184   | 2.4506383   | 2.5292392   | 2.4511862   | 2.4223356   | 2.4504704   | 2.5556564   |
| "Sprr2f"    | 2.5326304   | 2.672786    | 2.5993323   | 2.7387338   | 2.6140423   | 2.5551124   | 2.61205     | 2.7185936   |
| "Sprr2j-ps" | 2.7030709   | 2.8701782   | 3.0149515   | 2.9295456   | 2.825224    | 2.7443926   | 2.771032    | 2.899436    |
| "Sprr2k"    | 2.7689254   | 2.8723598   | 2.782097    | 2.8245158   | 2.801971    | 2.7968397   | 2.787791    | 2.830962    |
| "Spry1"     | 6.9579916   | 6.812382    | 6.3858976   | 6.5460606   | 6.4649744   | 6.608564    | 6.799551    | 6.943416    |
| "Spry2"     | 4.63955665  | 4.2864311   | 4.89763505  | 5.140275    | 4.6254288   | 4.29117735  | 4.8536477   | 5.1695968   |
| "Spryd4"    | 7.0434546   | 6.975545    | 7.083595    | 7.2889156   | 6.765677    | 6.4016814   | 7.0283504   | 7.223778    |
| "Spsb1"     | 5.463681825 | 6.207689825 | 3.214395175 | 2.9402144   | 5.124547175 | 5.912249675 | 3.318711075 | 3.085018525 |
| "Spsb2"     | 4.45894675  | 4.66698255  | 4.04518615  | 3.99792275  | 4.16930605  | 4.1476282   | 4.04901135  | 4.03755885  |
| "Spsb3"     | 7.618145    | 7.6821976   | 7.790085    | 7.964176    | 7.210529    | 6.9462595   | 8.018374    | 7.8793526   |
| "Spsb4"     | 2.70875585  | 2.7936336   | 2.8004874   | 2.880497    | 2.8185248   | 2.65428985  | 2.71435905  | 2.817233    |
| "Spt1"      | 2.78531     | 2.969203    | 2.8580275   | 3.036205    | 2.8652024   | 2.821097    | 2.8546689   | 2.9982834   |
| "Sptlc1"    | 5.1444594   | 5.9770584   | 5.225745233 | 5.195152733 | 5.508504533 | 5.702344733 | 5.317400133 | 5.311297533 |
| "Sptlc2"    | 5.3873363   | 4.8684597   | 5.398132    | 4.1177597   | 5.8047247   | 6.115064    | 5.4941235   | 4.771554    |
| "Spz1"      | 2.4359956   | 2.5249143   | 2.483565    | 2.586366    | 2.4882777   | 2.4370835   | 2.480706    | 2.591743    |
| "Sqle"      | 6.9614525   | 2.1626284   | 3.90165     | 2.254786    | 2.163468    | 2.176564    | 2.224528    | 2.2488267   |
| "Sqrdl"     | 9.064214    | 8.499257    | 9.285415    | 8.7744055   | 9.481924    | 9.184043    | 9.5509405   | 8.888629    |
| "Sgstm1"    | 12.06569    | 12.582993   | 11.160422   | 11.327987   | 12.088557   | 12.656595   | 11.598025   | 11.140136   |
| "Sra1"      | 9.33642     | 11.129966   | 8.8064375   | 9.231911    | 9.467963    | 10.366953   | 9.210941    | 9.04094     |
| "Src"       | 2.68902     | 2.7049766   | 2.6981213   | 2.841882    | 2.6957972   | 2.602684    | 2.6951635   | 2.7499802   |
| "Srcap"     | 2.4596367   | 3.425426    | 2.4162228   | 2.3537407   | 2.4330072   | 3.0613606   | 2.418443    | 2.494924    |
| "Srcin1"    | 2.5828059   | 2.7029076   | 2.5608099   | 2.6658294   | 2.5726926   | 2.5386534   | 2.5651493   | 2.6595612   |
| "Srd5a3"    | 2.977548325 | 2.836305975 | 3.251089625 | 3.14518475  | 3.037554975 | 3.417956675 | 3.4900555   | 3.13989875  |
| "Sreb1"     | 7.85465     | 7.710494    | 8.528033    | 8.500803    | 8.812869    | 8.146069    | 9.7327585   | 8.142026    |
| "Sreb2"     | 2.8178769   | 2.4392317   | 2.43342455  | 2.48277905  | 2.43373515  | 2.4219216   | 2.44479835  | 2.4867426   |
| "Srek1"     | 8.0353132   | 8.173196    | 7.2652589   | 7.092217133 | 7.293093667 | 7.674741567 | 7.567789267 | 7.302587467 |
| "Srek1ip1"  | 4.8832192   | 4.6972294   | 6.006185    | 6.564417    | 5.2005124   | 4.649053    | 6.4745965   | 6.3397145   |
| "Srf"       | 6.3056135   | 7.0157597   | 7.14408285  | 7.189135    | 6.4768955   | 6.122226    | 6.6373532   | 6.78914465  |
| "Srfbp1"    | 5.3682074   | 6.500182    | 4.83611625  | 4.7936497   | 5.29088915  | 5.4988818   | 4.8030294   | 4.846846    |
| "Srgap1"    | 2.365139    | 2.5158894   | 2.6072285   | 2.5299497   | 2.411975    | 2.3683605   | 2.4062514   | 2.5079393   |
| "Srgap2"    | 5.2750654   | 6.3341184   | 6.2284026   | 6.3279305   | 6.58071     | 7.106229    | 6.3066607   | 6.3619733   |
| "Srgap3"    | 2.4263724   | 2.5024141   | 2.88421335  | 2.5461489   | 2.47121785  | 2.5151469   | 2.47909585  | 2.52734385  |
| "Srgn"      | 10.395189   | 8.635402    | 9.376817    | 9.3752775   | 9.694375    | 10.805015   | 9.704165    | 9.6373      |
| "Sri"       | 5.2444705   | 4.39249685  | 5.31450715  | 4.9122236   | 5.41742285  | 5.9573126   | 5.603464    | 5.64921125  |
| "Srm"       | 6.6606255   | 6.753349    | 6.3546515   | 6.105099    | 6.575123    | 6.4016137   | 6.749895    | 6.042287    |
| "Srms"      | 2.5490248   | 2.7618394   | 2.5210493   | 2.608668    | 2.5650456   | 2.697472    | 2.556372    | 2.6414044   |
| "Srp19"     | 10.597002   | 11.172629   | 10.665709   | 10.611391   | 10.615061   | 11.009619   | 10.974448   | 10.532133   |
| "Srp54a"    | 8.489613    | 8.828827667 | 9.282206567 | 9.1643209   | 8.756986667 | 8.771430333 | 8.993496333 | 9.090363333 |
| "Srp68"     | 8.613207    | 9.175912    | 8.7703      | 8.749641    | 8.79718     | 8.885821    | 9.039854    | 8.754031    |
| "Srp9"      | 9.820963    | 9.8501475   | 10.2044285  | 10.269916   | 9.698025    | 9.6319      | 10.26265875 | 9.99733     |
| "Sprk1"     | 6.3360176   | 6.233012    | 6.648033    | 6.0243154   | 6.2885923   | 6.5412316   | 6.92693     | 5.8124933   |
| "Sprk2"     | 6.849053425 | 6.88785365  | 7.302111675 | 7.562879375 | 7.09093455  | 6.900195625 | 7.438076    | 7.480945675 |
| "Sprk3"     | 5.23348135  | 5.25233175  | 5.66932225  | 5.643626    | 5.02876895  | 4.69717725  | 5.70228715  | 5.38111985  |
| "Srp"       | 8.730554    | 9.4285145   | 9.845305    | 9.573776    | 9.31057     | 8.943922    | 9.454609    | 9.540674    |
| "Sprrb"     | 6.981700325 | 5.63590765  | 6.223437325 | 5.3817944   | 6.21253955  | 6.194442525 | 6.2020864   | 5.8524325   |
| "Srp"       | 2.8764129   | 3.0545182   | 3.786036    | 2.7331321   | 3.5919907   | 2.7480788   | 3.1595752   | 2.7356775   |
| "Srp2"      | 3.1109364   | 2.7736921   | 4.979654    | 3.6770425   | 4.0178175   | 3.901322    | 4.495458    | 3.9423637   |
| "Srr"       | 4.13332455  | 4.025540525 | 4.109916975 | 4.475626275 | 3.967078275 | 3.970755075 | 4.137807725 | 4.255956475 |
| "Srrd"      | 5.6022787   | 5.053399    | 4.3676023   | 4.150387    | 4.4508095   | 3.8461418   | 4.2533045   | 4.5614886   |
| "Srrm1"     | 7.32758475  | 7.743497575 | 7.176229525 | 7.159733025 | 7.379485375 | 7.511866825 | 7.08193365  | 7.16719575  |
| "Srrm2"     | 7.100724    | 7.680506    | 6.977753    | 7.2919407   | 7.130394    | 7.8823175   | 6.9038258   | 7.14962     |
| "Srrt"      | 6.309341    | 6.402637    | 6.2701144   | 6.236154    | 6.2849374   | 6.895949    | 6.4705358   | 6.2774367   |
| "Srsf1"     | 8.709252333 | 9.126167733 | 8.810774167 | 8.899378667 | 8.673497333 | 9.246702217 | 8.7955315   | 9.052312033 |
| "Srsf10"    | 6.633769625 | 6.994996775 | 6.2847893   | 6.643859725 | 6.5605212   | 6.526235325 | 6.553403775 | 6.48275685  |
| "Srsf11"    | 8.73226045  | 9.000193    | 8.39041835  | 8.430806    | 8.66363775  | 9.077378    | 8.40690425  | 8.4974235   |
| "Srsf2"     | 6.9283514   | 7.66949315  | 7.274617425 | 7.3146898   | 7.17218065  | 7.45219735  | 7.0861524   | 7.224397575 |

|              |             |             |             |             |             |             |             |             |
|--------------|-------------|-------------|-------------|-------------|-------------|-------------|-------------|-------------|
| "Srsf3"      | 6.451466833 | 7.618386017 | 7.0993634   | 7.2787125   | 6.950567067 | 7.115269783 | 7.089419083 | 7.10945295  |
| "Srsf4"      | 8.468115    | 8.743851    | 8.099061    | 7.9678016   | 8.389366    | 8.836799    | 8.286163    | 8.195736    |
| "Srsf5"      | 11.30766    | 11.275831   | 10.618469   | 10.135968   | 10.660177   | 10.774243   | 10.376868   | 10.340037   |
| "Srsf6"      | 9.369349333 | 9.798005667 | 9.412146    | 9.220217333 | 9.263528667 | 9.804243667 | 9.072521    | 9.272532167 |
| "Srsf7"      | 7.794929333 | 7.853913333 | 7.591086467 | 7.765163233 | 7.665888767 | 8.028571233 | 7.670214733 | 7.886021133 |
| "Srsf9"      | 6.6819806   | 6.4494476   | 7.597327    | 7.069746    | 7.1503654   | 7.3123045   | 7.4114456   | 7.285155    |
| "Srst"       | 2.300602    | 2.4215052   | 2.3648837   | 2.4844959   | 2.3614247   | 2.3297186   | 2.3556895   | 2.45469     |
| "Srxn1"      | 6.809960867 | 5.3955986   | 4.3753422   | 4.597589833 | 4.577176467 | 7.1773345   | 4.778433667 | 4.4099341   |
| "Sry"        | 2.53458565  | 2.6429621   | 2.55757035  | 2.6732683   | 2.56614805  | 2.5263225   | 2.55688895  | 2.6623285   |
| "Ss18"       | 5.47684205  | 5.591301    | 5.5935372   | 5.551127    | 5.7333475   | 5.67030715  | 5.65308075  | 5.617526    |
| "Ssb"        | 7.234774575 | 7.655751925 | 7.579113525 | 7.802139425 | 7.48990565  | 7.279872625 | 7.60876165  | 7.81121875  |
| "Ssbp1"      | 7.855345267 | 7.980186667 | 8.045314333 | 8.159661333 | 8.004483767 | 8.146935267 | 8.198955633 | 8.1338878   |
| "Ssbp2"      | 4.9227063   | 5.254214    | 5.6608132   | 5.5958393   | 5.2443688   | 5.1917124   | 5.6254541   | 5.4480484   |
| "Ssbp3"      | 4.03967555  | 3.5845108   | 4.42563725  | 4.12296515  | 4.23068515  | 3.9385571   | 4.3938324   | 4.2161715   |
| "Ssbp4"      | 3.0062063   | 3.2150464   | 3.4117193   | 3.6294634   | 3.4591722   | 3.4241269   | 3.5096452   | 3.4833758   |
| "Ssfa2"      | 7.617628    | 7.252928    | 7.234356    | 6.8924437   | 7.3895936   | 7.438058    | 7.4196715   | 7.3262277   |
| "Ssna1"      | 8.195002    | 8.048935    | 8.498668    | 8.504821    | 8.345066    | 8.223326    | 8.678061    | 8.389326    |
| "Sspn"       | 8.0176755   | 8.1668415   | 9.17673     | 9.389865    | 8.546851    | 7.6205365   | 9.080329    | 9.108283    |
| "Ssr1"       | 5.082811267 | 4.646511367 | 5.549574567 | 5.0246759   | 5.2085009   | 5.371387933 | 5.3760021   | 5.122721567 |
| "Ssr2"       | 6.849755    | 7.0786495   | 7.876875    | 7.5957656   | 7.0794497   | 7.2692018   | 7.6226225   | 7.552509    |
| "Ssr3"       | 10.713982   | 11.211314   | 11.430304   | 11.321781   | 11.148853   | 11.120133   | 11.223435   | 11.261969   |
| "Ssr4"       | 5.926094867 | 6.248142067 | 6.0643678   | 5.910727767 | 6.1643612   | 5.946437567 | 6.318897567 | 5.897361333 |
| "Ssrp1"      | 8.369696333 | 9.009914667 | 8.127351333 | 8.150960333 | 8.552944667 | 8.973491    | 8.215231667 | 8.177653333 |
| "Sssca1"     | 7.1913498   | 7.7027325   | 7.57815185  | 7.40770915  | 7.1855925   | 7.3489503   | 7.395947    | 7.19714135  |
| "Sstr5"      | 2.445982    | 2.5525482   | 2.4853852   | 2.7695158   | 2.4877367   | 2.4426105   | 2.4855886   | 2.556887    |
| "Ssu72"      | 9.748982    | 9.958292    | 9.258957    | 9.422135    | 9.827142    | 9.70366     | 9.996325    | 9.250457    |
| "Ssx2ip"     | 3.412056725 | 3.57395555  | 3.66100545  | 3.99373165  | 3.39364495  | 3.357055775 | 3.636321475 | 3.93650395  |
| "Ssxb1"      | 2.3725014   | 2.4559174   | 2.4106727   | 2.483514    | 2.395595    | 2.3632832   | 2.402719    | 2.505505    |
| "St13"       | 5.6698402   | 5.133671    | 5.5359843   | 5.5770246   | 5.6164276   | 5.4176165   | 6.0957007   | 5.6458345   |
| "St3gal1"    | 5.5737634   | 4.035192    | 4.377681    | 4.083358    | 3.9957292   | 4.622872    | 4.47336     | 3.9790292   |
| "St3gal2"    | 5.242107433 | 5.632121667 | 5.511503767 | 5.631098833 | 5.560425833 | 4.929389733 | 5.448239767 | 5.609313333 |
| "St3gal3"    | 6.1158888   | 6.127844    | 6.12825185  | 6.23917485  | 5.97544315  | 5.8465295   | 6.1843014   | 6.2732041   |
| "St3gal4"    | 3.2017741   | 2.8457327   | 2.8644161   | 2.9328861   | 2.8654623   | 2.8243713   | 3.6360378   | 2.742087    |
| "St3gal5"    | 9.501278    | 8.5648255   | 6.903346    | 8.64283775  | 9.044252    | 9.491293    | 8.3128785   | 8.6184255   |
| "St3gal6"    | 9.009631    | 9.8263395   | 10.4271545  | 10.581527   | 9.625404    | 9.6351405   | 10.0877865  | 10.202099   |
| "St5"        | 6.8643627   | 4.7325306   | 5.71561     | 5.0671306   | 5.57762     | 5.799348    | 5.5676293   | 5.2259383   |
| "St6gal1"    | 8.673526    | 5.3693304   | 6.758411    | 5.8514223   | 6.492393    | 7.416744    | 6.735859    | 6.5664463   |
| "St6galnac1" | 2.8043284   | 2.9417892   | 2.8756506   | 3.008093    | 2.8900836   | 2.8108454   | 2.865642    | 2.987692    |
| "St6galnac2" | 5.3824377   | 5.653083    | 5.6443024   | 5.657922    | 6.0682473   | 6.29219     | 5.6427107   | 5.9435      |
| "St6galnac3" | 2.5591016   | 2.6835318   | 2.81291     | 2.8117847   | 2.757392    | 2.918449    | 2.8330235   | 2.8165135   |
| "St6galnac4" | 4.69557785  | 4.3864529   | 4.4882373   | 4.6010404   | 4.62257135  | 4.338365    | 5.7873183   | 4.72672105  |
| "St6galnac5" | 2.5173285   | 2.67585755  | 2.6537012   | 2.73521575  | 3.7426062   | 2.8059228   | 2.63043275  | 2.7303555   |
| "St6galnac6" | 6.597326    | 6.879312    | 7.6567082   | 7.4809055   | 7.051175    | 6.9069643   | 7.306233    | 7.479851    |
| "St7"        | 3.4260018   | 2.7465334   | 3.289368    | 3.5120258   | 3.278971    | 3.1828756   | 2.9552837   | 3.9649832   |
| "St7l"       | 7.871727    | 7.9554033   | 7.488794    | 7.4941344   | 7.7524676   | 7.982257    | 7.3704515   | 7.51814     |
| "St8sia1"    | 2.72722     | 2.8351085   | 2.7912261   | 2.8962374   | 2.7909834   | 2.6840117   | 2.790243    | 2.8699002   |
| "St8sia4"    | 3.46756995  | 3.830476    | 4.37290345  | 4.63890955  | 4.6690904   | 4.962349    | 4.64380005  | 4.7913557   |
| "St8sia5"    | 5.466577    | 5.952144    | 7.0111027   | 7.2079244   | 6.2173057   | 4.761086    | 6.820878    | 6.644977    |
| "Stab1"      | 6.8445888   | 4.78753     | 6.4979124   | 5.31351     | 6.4606123   | 7.179136    | 6.718071    | 6.29406     |
| "Stab2"      | 7.227069    | 7.321948    | 6.188317    | 6.2179985   | 6.206816    | 6.498545    | 5.643877    | 6.1154714   |
| "Stac"       | 2.333662    | 2.4785054   | 2.4675791   | 2.5903153   | 2.4746122   | 2.450061    | 2.4676943   | 2.5241497   |
| "Stac2"      | 2.7374663   | 2.923794    | 2.915967    | 2.9734716   | 2.937086    | 2.8793435   | 2.907162    | 2.955834    |
| "Stag1"      | 4.820311625 | 5.495314825 | 5.197794825 | 5.599793325 | 5.313782    | 5.071735375 | 5.3306911   | 5.2775773   |
| "Stag2"      | 8.1978025   | 8.2055025   | 8.263103    | 8.2618375   | 8.25553225  | 8.4919194   | 8.379517    | 8.3404283   |
| "Stam"       | 5.90270235  | 6.35127715  | 6.0218816   | 5.9602557   | 6.17895465  | 5.8871215   | 5.75178575  | 5.9148763   |
| "Stam2"      | 3.73170484  | 4.01096712  | 3.80349858  | 3.84770344  | 3.80202286  | 3.78433732  | 3.79648814  | 3.84694172  |
| "Stampb"     | 3.930835    | 3.99154305  | 4.09964875  | 3.9324594   | 4.3857069   | 4.1245282   | 4.0752885   | 4.00053205  |
| "Stampbpl1"  | 2.0588188   | 2.0858102   | 2.0869384   | 2.1448178   | 2.269123    | 3.1981802   | 2.079404    | 2.1492927   |
| "Stap1"      | 2.2048545   | 2.2398274   | 2.2205307   | 2.3038101   | 2.2145479   | 3.568602    | 2.2164474   | 2.287124    |
| "Stap2"      | 5.90427305  | 3.4889659   | 4.47879345  | 4.32769095  | 4.671492    | 5.05463     | 4.7491763   | 4.64470815  |
| "Star"       | 2.39107455  | 2.5047468   | 2.46354215  | 2.5473374   | 2.49091935  | 2.3635046   | 2.445853    | 2.75834865  |
| "Stard10"    | 9.470123    | 6.425895    | 7.3463364   | 6.966615    | 6.858644    | 6.238797    | 7.7190566   | 7.1210833   |
| "Stard13"    | 4.290846    | 4.437611    | 4.8687744   | 4.1295147   | 4.3234706   | 3.9575434   | 4.3205667   | 4.5272036   |
| "Stard3"     | 6.3396263   | 7.138744    | 7.5860934   | 7.822076    | 7.3791995   | 6.452589    | 7.215684    | 7.8010387   |
| "Stard3nl"   | 5.6584234   | 5.1664734   | 6.180443    | 5.5196      | 5.9164076   | 6.4588833   | 5.989952    | 5.598337    |
| "Stard4"     | 4.211238    | 3.0618858   | 3.0200951   | 3.06419465  | 2.9831468   | 2.8948604   | 2.9744893   | 3.0738981   |
| "Stard5"     | 4.3731367   | 2.4503281   | 2.508230533 | 2.359142467 | 2.5846812   | 3.6838145   | 2.747109167 | 2.3459289   |
| "Stard6"     | 2.365657    | 2.4889789   | 2.8959172   | 2.6035206   | 2.3935804   | 2.4142551   | 2.430151    | 3.1949368   |
| "Stard7"     | 11.150265   | 11.089903   | 10.867462   | 11.206684   | 11.255293   | 10.603632   | 11.066435   | 11.255598   |
| "Stard8"     | 6.711517    | 5.982618    | 7.4718323   | 7.2026944   | 7.5347238   | 7.439609    | 7.674744    | 7.412938    |
| "Stat1"      | 5.509497733 | 4.604300467 | 5.575427467 | 5.4422789   | 5.499339567 | 5.900177667 | 6.799695133 | 5.923618667 |
| "Stat2"      | 2.48707415  | 2.5370745   | 2.5221261   | 2.6152554   | 2.5159056   | 2.4849278   | 2.7349155   | 2.6638235   |
| "Stat3"      | 9.052239    | 8.6780975   | 8.641588    | 7.958482    | 8.580462    | 8.7301995   | 8.6580445   | 8.2850225   |
| "Stat4"      | 2.2320974   | 2.2578356   | 2.2450411   | 2.3175924   | 2.216582    | 3.2429655   | 2.2134635   | 2.3065262   |
| "Stat5a"     | 3.711473    | 3.2440815   | 3.8931978   | 4.149945    | 3.7928972   | 3.2886589   | 4.8481154   | 3.8287857   |
| "Stat5b"     | 7.04450675  | 7.33769765  | 7.3108187   | 7.21891685  | 7.46543615  | 7.08576275  | 7.2467486   | 7.2490591   |
| "Stat6"      | 4.4710511   | 4.5507839   | 4.88523015  | 4.5822865   | 4.9141244   | 5.2547934   | 4.9666029   | 4.9360055   |
| "Stau1"      | 6.7793584   | 7.195760533 | 6.963633967 | 6.787535767 | 7.057634333 | 7.198668333 | 6.8818799   | 6.948121933 |
| "Stau2"      | 6.345148333 | 6.226441267 | 6.738415567 | 6.886030567 | 6.587621833 | 6.381729567 | 6.670065667 | 6.882581567 |
| "Stbd1"      | 9.240835    | 9.095346    | 9.665747    | 9.349844    | 8.120089    | 7.287066    | 10.683655   | 8.952879    |
| "Stc1"       | 2.48218465  | 2.7235695   | 2.5166837   | 2.63304465  | 2.5722934   | 2.5329447   | 2.49400805  | 2.6239527   |

|           |             |             |             |             |             |             |             |             |
|-----------|-------------|-------------|-------------|-------------|-------------|-------------|-------------|-------------|
| "Stc2"    | 3.06782525  | 5.10796715  | 2.48774695  | 2.57476615  | 3.52794455  | 3.11539435  | 2.48600755  | 2.41972875  |
| "Steap1"  | 2.4764748   | 2.59132     | 2.5308814   | 2.6253703   | 2.5305543   | 2.480367    | 2.5279078   | 2.6404614   |
| "Steap3"  | 2.920905    | 3.13137015  | 3.65423975  | 3.222741    | 3.07759215  | 2.9672314   | 3.3119142   | 3.3217846   |
| "Steap4"  | 6.7646607   | 5.569944    | 5.8159771   | 5.68920035  | 5.81614875  | 5.7433255   | 5.9959855   | 5.5936017   |
| "Stfa3"   | 2.8257382   | 3.074918    | 3.0425904   | 2.9724305   | 2.8922882   | 2.8076968   | 2.8909118   | 2.9543693   |
| "Stil"    | 2.2472436   | 2.4919205   | 2.27917     | 2.3680067   | 2.2823129   | 2.25037     | 2.2775612   | 2.36376     |
| "Stim1"   | 7.6818755   | 8.191262    | 8.3407345   | 8.578177    | 8.2153215   | 7.66989885  | 8.07355265  | 8.5712295   |
| "Stip1"   | 7.6893077   | 7.5103745   | 7.8398547   | 7.924113    | 7.610281    | 7.329923    | 8.076224    | 7.703123    |
| "Stk10"   | 3.715317    | 3.8158543   | 4.1340256   | 3.7128127   | 3.822576    | 5.0671906   | 4.517055    | 3.9933817   |
| "Stk11"   | 5.7223848   | 6.0377083   | 5.776448    | 5.8280037   | 5.8491227   | 5.713243    | 5.7551135   | 5.89406725  |
| "Stk11ip" | 5.1261907   | 6.6748075   | 3.9419675   | 3.4944196   | 5.3992577   | 5.900757    | 3.822565    | 4.005779    |
| "Stk16"   | 4.9115987   | 4.7800527   | 5.144285    | 4.8291636   | 5.060749    | 5.4341803   | 5.024977    | 4.759557    |
| "Stk17b"  | 6.8256865   | 5.823458    | 6.30430415  | 6.185699    | 6.94349075  | 8.5599015   | 7.4501665   | 6.69713075  |
| "Stk19"   | 4.1147914   | 5.06509     | 3.7950513   | 3.8589468   | 4.067397    | 4.4170938   | 3.7954388   | 3.8601553   |
| "Stk24"   | 7.0287473   | 7.3181755   | 7.13655835  | 7.07516115  | 7.4170051   | 7.5669658   | 6.8713892   | 7.0331125   |
| "Stk25"   | 8.968274    | 9.531962    | 9.4053335   | 9.217735    | 9.213546    | 9.4004135   | 9.234672    | 9.225757    |
| "Stk3"    | 3.725098433 | 3.596619267 | 3.826020533 | 3.895004967 | 3.7256809   | 3.744560733 | 3.845021967 | 3.884969533 |
| "Stk31"   | 2.8337228   | 3.08752745  | 2.9125738   | 3.0791069   | 2.92785885  | 2.85784245  | 2.9086941   | 3.0468998   |
| "Stk32b"  | 2.7369347   | 2.7759516   | 2.7281237   | 2.8389704   | 2.7536674   | 2.6694505   | 2.7209935   | 2.8251443   |
| "Stk35"   | 2.94507     | 3.2212396   | 3.1290293   | 3.3749247   | 3.1589444   | 3.1093607   | 3.113085    | 3.2188768   |
| "Stk38"   | 8.781703    | 8.700869    | 8.811933    | 8.6078      | 9.039965    | 9.381778    | 8.879621    | 8.859534    |
| "Stk39"   | 3.1711719   | 3.466211    | 3.343377433 | 3.462476733 | 3.349943133 | 3.321221267 | 3.475004    | 3.418194367 |
| "Stk4"    | 3.076654    | 3.1927464   | 2.9494002   | 3.5539813   | 3.335102    | 3.8590074   | 3.0600533   | 3.1691332   |
| "Stk40"   | 8.193756    | 8.575702    | 8.599435    | 8.527006    | 7.9999037   | 7.479701    | 9.043312    | 8.068853    |
| "Stmn1"   | 5.55312425  | 4.6773062   | 5.7285475   | 4.54013275  | 5.45065215  | 5.607937    | 5.71192235  | 5.22150185  |
| "Stmn2"   | 4.1883661   | 2.9017638   | 3.6121292   | 3.2695544   | 3.63153985  | 3.4445201   | 2.7635317   | 3.72790865  |
| "Stmn3"   | 3.30034235  | 3.3692795   | 3.31960105  | 3.9332495   | 3.21942505  | 3.2803833   | 3.2909676   | 3.4202629   |
| "Stom"    | 4.32603264  | 4.10563192  | 4.0997272   | 4.00687932  | 4.39997558  | 4.18434646  | 4.57516096  | 4.34457684  |
| "Stoml2"  | 9.020204    | 9.214547    | 9.384995    | 9.332097    | 9.223946    | 8.907559    | 9.791263    | 9.277924    |
| "Stra13"  | 7.134429    | 6.4502425   | 7.09707     | 7.0163746   | 7.028618    | 6.478853    | 7.1734047   | 6.99088     |
| "Strada"  | 2.4956741   | 2.591251    | 2.8519392   | 2.6574092   | 2.5432017   | 2.6250129   | 3.0334034   | 2.6309524   |
| "Strap"   | 7.622187167 | 8.0286089   | 8.021536433 | 8.1232875   | 7.775447567 | 7.853600167 | 7.920910333 | 8.3844612   |
| "Strbp"   | 5.0261309   | 4.7578169   | 5.20332225  | 5.1483223   | 4.3261659   | 4.81937055  | 4.9454498   | 5.29891165  |
| "Strn"    | 5.959987    | 6.158175    | 6.3273454   | 6.213383    | 6.340791    | 6.3893375   | 6.2224865   | 6.4318895   |
| "Strn3"   | 10.5947565  | 11.113764   | 11.454825   | 11.5113005  | 10.8714175  | 10.78551    | 11.2102365  | 11.5771     |
| "Strn4"   | 7.138904    | 7.2226954   | 7.1471744   | 7.0917006   | 7.1453886   | 7.5052094   | 7.1377745   | 6.703635    |
| "Sts"     | 5.706767    | 6.5399847   | 5.7101536   | 5.0363655   | 5.710199    | 5.93689     | 5.3767214   | 5.210664    |
| "Stt3a"   | 6.6842633   | 6.057143    | 7.002694167 | 6.562001633 | 6.523100267 | 6.583223333 | 6.6887379   | 6.881317867 |
| "Stt3b"   | 10.17851175 | 11.0230145  | 9.48005605  | 9.58841     | 10.1702265  | 10.8462095  | 10.1876465  | 9.4046005   |
| "Stub1"   | 9.5515715   | 9.498232    | 9.933364    | 9.991283    | 9.5324175   | 9.186926    | 10.071497   | 9.8886155   |
| "Stx12"   | 8.775176    | 9.193296    | 9.225224    | 9.173488    | 9.187078    | 9.187332    | 9.262528    | 9.143333    |
| "Stx17"   | 5.62111775  | 5.784853725 | 6.050328675 | 6.108673325 | 5.867591075 | 5.860639525 | 5.855638875 | 6.12682495  |
| "Stx18"   | 5.16559492  | 5.2065533   | 4.84230992  | 4.83821878  | 4.8629524   | 5.20946362  | 5.03226392  | 4.94747178  |
| "Stx1a"   | 3.0482495   | 3.1049676   | 3.0559542   | 3.1480234   | 3.0937767   | 3.055933    | 3.5245326   | 3.4201212   |
| "Stx1b"   | 2.8533797   | 2.9701262   | 2.857592    | 3.0461867   | 2.8600125   | 2.818518    | 2.855412    | 2.9207094   |
| "Stx2"    | 4.9726777   | 4.95619     | 5.219896    | 5.2584214   | 5.2443376   | 5.1897244   | 5.5796666   | 5.2399716   |
| "Stx3"    | 4.4310365   | 4.5227189   | 4.0806087   | 4.2422121   | 4.66460185  | 4.79242745  | 3.9183357   | 4.3784196   |
| "Stx4a"   | 8.778722    | 8.478496    | 9.161882    | 9.0085125   | 8.605754    | 8.387477    | 9.322264    | 8.870366    |
| "Stx5a"   | 6.17330415  | 6.40321615  | 5.806926    | 5.80032755  | 6.23900725  | 6.7720035   | 5.8703803   | 6.0341649   |
| "Stx6"    | 5.962970333 | 6.3716868   | 6.1635672   | 6.1168243   | 6.245648733 | 6.635879633 | 6.171980033 | 6.045765667 |
| "Stx7"    | 7.552354    | 7.463251    | 7.9592395   | 7.978895    | 7.747957    | 7.8657722   | 8.269617    | 7.9767127   |
| "Stx8"    | 6.202656233 | 6.417423867 | 6.127864433 | 6.202897    | 6.091019033 | 5.8613664   | 6.426009367 | 6.092487    |
| "Stxbp1"  | 2.3726006   | 2.5506012   | 2.41177961  | 2.5157354   | 2.4221811   | 2.3785348   | 2.4152484   | 2.513604    |
| "Stxbp2"  | 2.5652025   | 2.599187    | 3.0380993   | 2.660905    | 2.567277    | 2.5188336   | 2.5608888   | 2.6003547   |
| "Stxbp3a" | 6.40006465  | 6.67772825  | 7.08785625  | 7.3369843   | 6.75658325  | 6.410011    | 6.884364    | 7.2711263   |
| "Stxbp4"  | 4.6452189   | 4.9643095   | 5.20212555  | 5.4799675   | 4.30427155  | 3.5408645   | 5.402486    | 5.26107525  |
| "Stxbp6"  | 3.1601584   | 3.3458276   | 3.3365722   | 3.5293639   | 4.145671    | 3.1787612   | 3.3137872   | 3.463945    |
| "Styx"    | 2.6424809   | 2.844102    | 2.709731    | 2.8497834   | 2.7086912   | 2.6816182   | 2.69795     | 2.8251076   |
| "Sub1"    | 8.61383285  | 9.8115115   | 9.1927467   | 9.633218    | 8.89991095  | 9.7740575   | 8.6890125   | 9.1979655   |
| "Sucta2"  | 13.238407   | 13.129875   | 13.452251   | 13.701471   | 13.428995   | 13.381144   | 13.311207   | 13.69754    |
| "Suctl1"  | 11.84819    | 11.949851   | 12.242949   | 12.446338   | 12.192196   | 11.852508   | 11.907139   | 12.310092   |
| "Suctl2"  | 7.8670053   | 7.5981493   | 7.956164    | 7.876583    | 7.860642    | 7.333402    | 7.9395924   | 8.227439    |
| "Sucnr1"  | 2.9889126   | 3.3789277   | 3.5052538   | 3.2827992   | 4.364934    | 3.987878    | 4.1827273   | 3.4104462   |
| "Suds3"   | 7.47639935  | 7.50034535  | 7.73051015  | 7.6610277   | 7.367772    | 6.98661945  | 7.544942    | 7.4703295   |
| "Sufu"    | 3.61591115  | 3.7027452   | 3.6820865   | 3.6985314   | 3.92431225  | 4.03813205  | 3.7037114   | 3.76226355  |
| "Sugp1"   | 7.5891924   | 8.398095    | 7.774822    | 7.5565033   | 8.040867    | 8.062645    | 7.699326    | 7.6479607   |
| "Sugp2"   | 4.883493867 | 5.726505133 | 5.175456233 | 5.299896267 | 5.167884133 | 5.024859133 | 5.030615867 | 5.325365533 |
| "Sugt1"   | 9.1660815   | 9.7428775   | 9.6024895   | 9.504638    | 9.6044395   | 9.269412    | 9.517413    | 9.6798425   |
| "Sulf2"   | 4.974866    | 4.5673347   | 5.550199    | 4.654623    | 6.0078473   | 5.4052114   | 5.4394464   | 4.668334    |
| "Sult1a1" | 11.723336   | 9.992783    | 9.113621    | 8.8402      | 10.985784   | 11.23898    | 9.831385    | 9.608379    |
| "Sult1b1" | 3.571612    | 2.6613178   | 2.6430712   | 2.7187374   | 2.5989628   | 2.5401187   | 2.587284    | 2.7089033   |
| "Sult1d1" | 8.2153468   | 2.64878645  | 2.6021465   | 2.7312975   | 2.60035575  | 2.5222596   | 2.5753413   | 2.6992908   |
| "Sult1e1" | 3.3941684   | 2.6774802   | 2.5985196   | 2.704741    | 2.61091     | 2.6038654   | 2.589072    | 2.6943657   |
| "Sult2a2" | 2.54423     | 2.5374327   | 2.5073555   | 2.599959    | 2.6391337   | 2.3911028   | 2.4733229   | 2.5739093   |
| "Sult3a1" | 2.5672603   | 2.6955414   | 2.6188467   | 2.770022    | 2.6312528   | 2.572497    | 2.6193557   | 2.745384    |
| "Sult5a1" | 5.5776663   | 5.5652113   | 5.828477    | 4.9471307   | 5.601223    | 5.558818    | 5.48374     | 5.0092435   |
| "Sumf1"   | 6.84003445  | 7.5990515   | 6.65289525  | 6.9609      | 7.11303035  | 7.13773085  | 6.5844098   | 7.0189252   |
| "Sumo1"   | 10.71429533 | 11.11139267 | 11.192305   | 11.16668767 | 11.00806433 | 11.02427867 | 11.25799867 | 11.059981   |
| "Sumo2"   | 11.638546   | 11.643732   | 12.213306   | 12.127918   | 11.946276   | 11.928617   | 12.387287   | 12.1454735  |
| "Sumo3"   | 10.14514    | 10.306629   | 9.970205    | 9.783426    | 10.435688   | 10.6442175  | 10.081379   | 9.74599     |
| "Sun1"    | 6.62260825  | 7.6485955   | 6.876295    | 6.84286715  | 7.38667375  | 7.19107975  | 6.52326275  | 6.842194    |

|            |             |             |             |             |             |             |             |             |
|------------|-------------|-------------|-------------|-------------|-------------|-------------|-------------|-------------|
| "Sun2"     | 10.063862   | 10.902096   | 9.70019     | 9.839905    | 10.522809   | 10.818371   | 9.2222395   | 9.8314085   |
| "Suox"     | 7.1185937   | 7.0246096   | 6.9877195   | 7.1738825   | 7.0398197   | 6.560023    | 6.4845123   | 7.2516356   |
| "Supt16h"  | 4.86022735  | 5.08829895  | 4.9036555   | 4.75271035  | 5.0875885   | 5.252098    | 4.8754649   | 4.80088655  |
| "Supt5h"   | 9.140721    | 9.58614     | 9.028816    | 8.896761    | 9.468697    | 9.538288    | 9.318587    | 9.090308    |
| "Supt6h"   | 5.700536    | 6.860039    | 4.99615     | 5.3673053   | 6.18046     | 6.777872    | 5.4933443   | 5.330032    |
| "Supv3l1"  | 6.9430285   | 7.6140914   | 7.0371113   | 7.486307    | 7.588447    | 7.099023    | 7.1346083   | 7.2702217   |
| "Surf1"    | 9.323328    | 9.526415    | 9.2475395   | 9.248429    | 9.47221     | 9.592484    | 9.249279    | 9.276642    |
| "Surf2"    | 4.38807515  | 4.67535045  | 4.28840725  | 4.58357345  | 4.4366207   | 4.2881109   | 4.31211615  | 4.36306315  |
| "Surf4"    | 7.73491352  | 7.90893018  | 8.0980159   | 8.0397836   | 7.75428792  | 8.0502183   | 7.96105198  | 7.75782876  |
| "Surf6"    | 5.34446     | 6.31425     | 5.5155816   | 5.526696    | 5.500156    | 5.559232    | 5.457316    | 5.3913765   |
| "SUSD2"    | 1.9620433   | 1.9839631   | 3.7254095   | 2.0272515   | 1.8699723   | 2.332704    | 2.6681142   | 1.957047    |
| "SUSD4"    | 2.5517042   | 2.6068976   | 2.5780256   | 2.6635041   | 2.577537    | 2.5334203   | 2.5939567   | 2.6558416   |
| "Suv39h1"  | 3.9241014   | 4.703651    | 3.9784234   | 3.857934    | 4.740555    | 4.2799225   | 3.393545    | 3.7929811   |
| "Suv39h2"  | 2.6193094   | 2.8943386   | 2.7106652   | 2.9233332   | 2.7254896   | 2.6157696   | 2.6996613   | 2.8554654   |
| "Suv420h1" | 4.614013775 | 5.13323575  | 4.369515    | 4.367926175 | 4.6448648   | 4.85787545  | 4.35173265  | 4.3334046   |
| "Suv420h2" | 2.7485268   | 3.1427865   | 3.3665473   | 3.237739    | 3.3561563   | 3.1835003   | 3.540309    | 3.153215    |
| "Suz12"    | 5.459824817 | 5.702452283 | 5.647913017 | 5.696328133 | 5.717381417 | 5.783341817 | 5.520845317 | 5.734114383 |
| "Sv2a"     | 2.4913056   | 2.4600534   | 2.4328964   | 2.537957    | 2.454465    | 2.4001236   | 2.4225216   | 2.5079825   |
| "Sva"      | 2.3109884   | 2.3942583   | 2.3440897   | 2.461238    | 2.3509533   | 2.3251684   | 2.3434136   | 2.4430346   |
| "Sval1"    | 2.806409    | 2.9729629   | 2.9344492   | 3.048023    | 2.9317703   | 2.888028    | 2.920925    | 3.0198355   |
| "Sval2"    | 2.5909133   | 2.7291064   | 2.6473541   | 2.8025746   | 2.6610796   | 2.5979273   | 2.6485503   | 2.777025    |
| "Svep1"    | 4.792206    | 5.194743    | 6.085082    | 5.0097938   | 6.669967    | 6.3632307   | 5.8437357   | 5.743711    |
| "Svil"     | 9.879497    | 11.036849   | 10.150512   | 10.180816   | 10.333247   | 10.6195425  | 9.526944    | 10.1781875  |
| "Svs2"     | 2.5765912   | 2.72754465  | 2.61958975  | 2.7670246   | 2.6307075   | 2.57872975  | 2.61883665  | 2.7109092   |
| "Svs4"     | 2.3912346   | 2.487673    | 2.434656    | 2.5559509   | 2.4402723   | 2.4000638   | 2.4369273   | 2.5420933   |
| "Svs5"     | 2.4128645   | 2.50884685  | 2.4567654   | 2.59240455  | 2.461196075 | 2.390025375 | 2.453968675 | 2.55845905  |
| "Svs6"     | 2.513534    | 2.6120245   | 2.5523071   | 2.6990783   | 2.5598269   | 2.5094862   | 2.5516505   | 2.6710794   |
| "Swap70"   | 3.806139    | 3.8195922   | 4.3594503   | 4.344172    | 4.934225    | 5.520607    | 4.4548035   | 4.4692636   |
| "Swi5"     | 10.593576   | 10.158518   | 10.468356   | 10.334178   | 9.981682    | 9.995316    | 10.941268   | 10.536642   |
| "Syap1"    | 8.761719    | 8.921154    | 9.255957    | 9.130595    | 9.240662    | 9.054931    | 9.383543    | 9.109557    |
| "Syce2"    | 2.684591    | 2.5066423   | 2.7289925   | 2.5824783   | 2.6258323   | 2.5510607   | 2.5768273   | 2.5725312   |
| "Sycn"     | 2.605954    | 2.6345124   | 2.575755    | 2.6702106   | 2.5853326   | 2.551426    | 2.5752602   | 2.6606395   |
| "Sycp1"    | 2.6194546   | 2.7977562   | 2.6855156   | 2.846204    | 2.7022245   | 2.675676    | 2.6874545   | 2.7734787   |
| "Sycp3"    | 3.262606    | 3.49326     | 3.391828    | 3.61957     | 3.4398332   | 3.965503    | 3.4917226   | 3.5913527   |
| "Syf2"     | 8.779241    | 9.437156    | 8.307366    | 8.357939    | 8.873694    | 9.267144    | 8.620154    | 8.517409    |
| "Syk"      | 2.6682957   | 2.6920283   | 2.70268605  | 2.71073325  | 2.6366551   | 4.8125      | 2.97254765  | 2.71978245  |
| "Syn2"     | 3.2135365   | 4.9250796   | 2.6227105   | 2.9721258   | 2.956806    | 3.49218835  | 2.9214716   | 2.85619175  |
| "Sync"     | 6.4044855   | 6.379320333 | 6.2415484   | 6.540019667 | 6.0976935   | 5.823737233 | 6.5843149   | 6.33640667  |
| "Syncrip"  | 6.19648815  | 6.242124    | 6.4757826   | 6.81618     | 6.2896093   | 6.1795127   | 6.758215925 | 6.6038935   |
| "Syne1"    | 7.43015675  | 8.87713635  | 6.93120435  | 6.958273    | 7.0334705   | 7.353244    | 6.74431015  | 6.87003265  |
| "Syne2"    | 6.8860917   | 7.812372    | 7.2015243   | 7.703123    | 6.848292    | 7.4474583   | 6.861497    | 7.7629957   |
| "Syngr1"   | 3.665510867 | 4.100270667 | 4.394210367 | 4.3454849   | 4.040203633 | 3.938438667 | 4.221297967 | 4.2550835   |
| "Syngr2"   | 10.7443965  | 11.1559415  | 11.2784805  | 11.126541   | 10.8586475  | 10.4101815  | 11.1802755  | 10.851561   |
| "Syngr4"   | 2.628635    | 2.7133555   | 2.6770642   | 2.7463841   | 2.6904597   | 2.6727219   | 2.6896586   | 2.7593274   |
| "Synj2"    | 3.71828626  | 4.83396254  | 3.73630732  | 3.8336591   | 4.3882659   | 3.89231874  | 3.28725606  | 3.8578235   |
| "Synj2bp"  | 7.29768545  | 7.43463095  | 7.70460175  | 7.85069665  | 7.345541675 | 7.310452875 | 7.616744475 | 7.801612825 |
| "Synpo"    | 6.255733    | 5.7890838   | 6.2388295   | 6.15594385  | 6.32217125  | 5.88448265  | 5.70406315  | 5.940775    |
| "Synpo2"   | 7.4632244   | 7.424822    | 8.87013     | 9.306555    | 8.193369    | 6.038958    | 8.465645    | 9.080176    |
| "Synpr"    | 2.8982193   | 3.1246758   | 2.9939315   | 3.1838217   | 3.0084875   | 2.9353042   | 2.9864845   | 3.134438    |
| "Synrg"    | 5.913946    | 6.216319    | 6.059382    | 5.66932     | 5.760421    | 5.567541    | 6.1925716   | 5.952446    |
| "Syp"      | 2.9401603   | 3.0530078   | 3.0166593   | 3.2134106   | 3.022647    | 2.9533017   | 3.0172539   | 3.1018238   |
| "Sypl"     | 8.85922475  | 9.059337375 | 9.819812375 | 10.09482043 | 9.421159625 | 9.07295625  | 9.5671015   | 10.10637525 |
| "Sypl2"    | 8.882413    | 8.308615    | 10.510068   | 10.321905   | 8.696154    | 8.365552    | 9.581267    | 10.158273   |
| "Sys1"     | 6.50048615  | 6.633325    | 6.7015015   | 6.7577205   | 6.5453525   | 6.607565    | 6.64596865  | 6.695898    |
| "Syt11"    | 3.323845033 | 3.276618167 | 3.332013033 | 3.640788933 | 3.352338633 | 3.1914187   | 3.489442767 | 3.480954033 |
| "Syt12"    | 3.0390477   | 2.3961024   | 2.06297     | 2.1102183   | 2.4489224   | 2.3621547   | 2.0591114   | 2.1033707   |
| "Syt13"    | 2.5298464   | 2.574809    | 2.5486643   | 2.623289    | 2.551802    | 2.523754    | 2.5407567   | 2.622343    |
| "Syt2"     | 2.5362868   | 2.6153176   | 2.5920615   | 2.6595364   | 2.6051507   | 2.5883398   | 2.5907536   | 2.7047443   |
| "Syt4"     | 2.46924675  | 2.63675905  | 2.66378255  | 2.697665    | 2.5861355   | 2.5193529   | 2.5663112   | 2.67299725  |
| "Syt6"     | 2.4394321   | 2.5268536   | 2.457551    | 2.5107431   | 2.454574    | 2.4329734   | 2.4551482   | 2.510904    |
| "Syt8"     | 2.7961185   | 2.888239    | 2.8374593   | 2.957454    | 2.8314319   | 2.7954807   | 2.8337157   | 2.8868809   |
| "Syt9"     | 2.3664598   | 2.4733403   | 2.402187    | 2.486133    | 2.4071453   | 2.3632429   | 2.402579    | 2.4735978   |
| "Syt12"    | 5.7564335   | 4.780206    | 6.8015714   | 5.4680758   | 4.86326     | 4.592189    | 6.9563665   | 5.734352    |
| "Syt13"    | 2.5534346   | 2.5910757   | 2.5614321   | 2.670243    | 2.562638    | 2.5235589   | 2.5575964   | 2.63576     |
| "Syt14"    | 2.8197355   | 3.05952025  | 2.9118862   | 3.04102685  | 2.92369755  | 2.8406762   | 2.9020567   | 2.99514125  |
| "Syvn1"    | 4.894962    | 4.9110613   | 4.4519787   | 4.4749346   | 5.216872    | 6.000486    | 4.6786017   | 4.34546     |
| "T"        | 2.3339758   | 2.4204497   | 2.3875515   | 2.4821372   | 2.3869789   | 2.332519    | 2.3870537   | 2.4698658   |
| "T2"       | 2.5839643   | 3.2728808   | 2.6274588   | 2.6578615   | 2.855869    | 2.578433    | 2.6136537   | 2.6588387   |
| "Tab1"     | 4.389697    | 4.389468    | 4.290372    | 4.2600756   | 3.9714348   | 3.8934393   | 4.7148137   | 4.5349836   |
| "Tab2"     | 9.5582255   | 10.0902365  | 10.646934   | 10.7462785  | 10.0767925  | 10.04371075 | 10.3200305  | 10.695993   |
| "Tab3"     | 5.8632846   | 6.1121387   | 6.5783386   | 6.562346    | 6.4623156   | 6.36276     | 6.780239    | 6.7232523   |
| "Tac1"     | 2.9602876   | 3.2619436   | 3.0930316   | 3.2454157   | 3.132259    | 2.9854014   | 3.0894473   | 3.2011752   |
| "Tacc2"    | 13.405236   | 14.242467   | 11.931807   | 12.016251   | 13.953949   | 14.070963   | 11.825264   | 12.225948   |
| "Tacc3"    | 3.1857645   | 3.3515792   | 3.2788839   | 3.33900535  | 3.30420455  | 3.25943645  | 3.2479192   | 3.29880435  |
| "Tacr3"    | 2.361554    | 2.4713871   | 2.4006484   | 2.5364406   | 2.4117928   | 2.3587782   | 2.411901    | 2.5040114   |
| "Tacstd2"  | 2.3644161   | 2.4599037   | 2.553434    | 2.515084    | 2.4082224   | 2.3623602   | 2.4528017   | 2.5006251   |
| "Tada1"    | 5.1462235   | 3.7702787   | 5.2070646   | 5.271228    | 5.207447    | 5.18615     | 5.7892084   | 5.487731    |
| "Tada2a"   | 6.943273    | 7.795065    | 8.121694    | 8.381705    | 7.6795874   | 6.7041845   | 7.4683733   | 7.8871098   |
| "Tada2b"   | 7.2236495   | 8.370631    | 7.29623     | 8.005516    | 7.668789    | 8.179416    | 7.5374203   | 7.2313976   |
| "Tada3"    | 4.956564    | 5.5948524   | 5.924574    | 6.362026    | 5.9682508   | 5.439935    | 5.6844363   | 5.8360543   |
| "Taf10"    | 7.912323    | 7.88041425  | 7.8555455   | 7.815697    | 7.84975775  | 7.7336625   | 8.26401765  | 7.9345782   |

|            |             |             |             |             |             |             |             |             |
|------------|-------------|-------------|-------------|-------------|-------------|-------------|-------------|-------------|
| "Taf11"    | 6.5303636   | 7.2455845   | 6.545878    | 7.4071164   | 6.511144    | 6.546009    | 6.7897596   | 7.1472707   |
| "Taf12"    | 7.2838717   | 7.5122666   | 7.5211024   | 7.7405367   | 7.100585    | 6.904646    | 8.037718    | 7.612646    |
| "Taf13"    | 8.856551    | 9.13845     | 9.487935    | 9.621626    | 8.9788885   | 8.934502    | 9.483285    | 9.421277    |
| "Taf1a"    | 3.3104463   | 4.836928    | 3.1923785   | 2.9730487   | 3.3167408   | 4.1145034   | 3.1508203   | 3.3868475   |
| "Taf1b"    | 4.893415    | 5.251323    | 5.2510257   | 4.7836866   | 4.3564916   | 5.012843    | 4.9621196   | 4.258442    |
| "Taf1c"    | 5.876645    | 6.004572    | 5.6998568   | 5.997233    | 5.7544036   | 6.1226883   | 5.879096    | 5.8245296   |
| "Taf1d"    | 5.01754438  | 5.80687558  | 4.31962338  | 4.39694906  | 5.20448416  | 5.48721164  | 4.37420504  | 4.51027568  |
| "Taf4a"    | 6.29186105  | 6.5006575   | 5.61797185  | 6.0805304   | 6.47151275  | 6.270818    | 5.74413665  | 6.36767275  |
| "Taf5l"    | 6.380416    | 7.225527    | 6.0737047   | 6.393407    | 6.434247    | 6.779401    | 6.2863126   | 6.02258     |
| "Taf6"     | 5.6956644   | 5.7336845   | 6.186652    | 6.091126    | 5.775008    | 5.6138434   | 6.4224377   | 5.8229513   |
| "Taf7"     | 5.9169395   | 7.9753905   | 5.5447798   | 4.970104    | 6.76543925  | 8.498164    | 4.7479407   | 5.4483184   |
| "Taf7l"    | 2.3174744   | 2.4636102   | 2.37667     | 2.4732723   | 2.376014    | 2.325242    | 2.3789701   | 2.4637308   |
| "Taf8"     | 5.86772845  | 6.6576686   | 4.5599835   | 5.1294802   | 5.757324    | 6.46430115  | 4.67568135  | 5.3969376   |
| "Taf9"     | 9.253628    | 9.57169     | 10.099153   | 10.257387   | 9.534261    | 9.420003    | 9.862352    | 9.943317    |
| "Tagln"    | 9.508716    | 9.752284    | 9.554341    | 9.15304     | 9.834609    | 9.659992    | 9.4453125   | 8.933139    |
| "Tagln2"   | 6.86365435  | 6.63953325  | 7.40256765  | 6.5343243   | 7.1553032   | 7.698008    | 7.13132955  | 6.7849335   |
| "Tagln3"   | 2.8693342   | 2.9891472   | 2.961715    | 3.0388997   | 2.9466667   | 2.9416022   | 2.937452    | 3.0248044   |
| "Tali1"    | 2.434037    | 2.4710476   | 2.4492419   | 2.5525246   | 2.449231    | 2.4305406   | 2.450133    | 2.5128527   |
| "Tali2"    | 2.6464534   | 2.755981    | 2.727528    | 2.8059206   | 2.7271643   | 2.6692293   | 2.726725    | 2.7998345   |
| "Taldo1"   | 10.431779   | 10.292736   | 10.836017   | 10.650107   | 10.836228   | 10.595614   | 11.431803   | 10.55825    |
| "Tanc1"    | 6.3096566   | 6.842672    | 6.377676    | 6.389656    | 6.811734    | 7.1706758   | 6.8699408   | 6.835927    |
| "Tank"     | 7.377379    | 7.7096972   | 7.536853    | 7.7629647   | 7.6046963   | 7.7135906   | 7.613661    | 7.7025223   |
| "Taok1"    | 6.456326975 | 6.539434675 | 7.100546625 | 7.204595525 | 6.721488475 | 6.49370425  | 6.864513575 | 7.077366425 |
| "Taok3"    | 6.57521295  | 5.13497085  | 5.871109    | 5.9455947   | 5.4952582   | 6.0691977   | 5.8600065   | 6.0120675   |
| "Tap1"     | 3.221592    | 2.74412275  | 3.1921947   | 3.15678715  | 3.35734935  | 3.76270055  | 3.78686475  | 3.1488036   |
| "Tap2"     | 4.7570667   | 4.0376763   | 4.771681    | 4.8067474   | 4.7700686   | 5.6630607   | 5.645957    | 4.806472    |
| "Tapbp"    | 5.58411025  | 4.94780625  | 5.47610615  | 5.18629485  | 5.53072655  | 5.7507977   | 5.700674    | 5.36692835  |
| "Tapbpl"   | 4.0375805   | 3.9034657   | 3.6458037   | 4.129504    | 3.9902604   | 4.399053    | 4.1560693   | 3.9177308   |
| "Tarbp2"   | 6.82472155  | 7.3561843   | 7.235429    | 7.4653173   | 7.07269515  | 7.037241    | 6.8812247   | 7.3378475   |
| "Tardbp"   | 8.33900925  | 8.9227245   | 8.150583675 | 8.282036575 | 8.2907915   | 8.8902574   | 8.17514675  | 8.40680815  |
| "Tars"     | 9.263829    | 10.367556   | 9.197338    | 9.262095    | 9.171914    | 9.649019    | 8.801528    | 9.202733    |
| "Tars2"    | 6.6839275   | 7.02925495  | 6.7524545   | 6.97066215  | 6.8423791   | 6.63031885  | 6.78301825  | 7.08207085  |
| "Taslr3"   | 2.4145343   | 2.505565    | 2.4488952   | 2.5557265   | 2.4400744   | 2.405651    | 2.4478376   | 2.5249088   |
| "Tasp1"    | 3.8341593   | 4.35544505  | 4.05303265  | 4.37421655  | 4.03978835  | 4.0470305   | 3.81808475  | 4.37220135  |
| "Tat"      | 11.810372   | 2.114052    | 2.321932    | 2.1699443   | 2.1050785   | 2.0779858   | 2.0980651   | 2.1649535   |
| "Taxlbp1"  | 6.441165733 | 7.3607009   | 5.986473467 | 6.132055967 | 6.600795933 | 7.0822916   | 6.059805167 | 6.149131333 |
| "Taz"      | 8.164596    | 8.752068    | 8.516949    | 8.66565     | 8.47079     | 8.59855     | 8.587356    | 8.739039    |
| "Tbata"    | 2.688162    | 2.94441     | 2.7778795   | 2.9862404   | 2.7908497   | 2.703214    | 2.7955084   | 2.8753896   |
| "Tbc1d10a" | 3.225615    | 3.9867215   | 3.5381746   | 3.5298712   | 3.4934623   | 3.4397311   | 3.2932842   | 3.5703082   |
| "Tbc1d10b" | 7.898524    | 8.081844    | 7.9636135   | 8.043822    | 7.899955    | 7.881377    | 8.212769    | 7.8102865   |
| "Tbc1d13"  | 2.3997645   | 2.408951    | 2.3994856   | 2.4725332   | 2.397997    | 2.3780913   | 2.395943    | 2.4543538   |
| "Tbc1d14"  | 3.2089717   | 3.4167902   | 3.3276439   | 3.4184403   | 3.330965    | 3.3005352   | 3.3283968   | 3.3980875   |
| "Tbc1d15"  | 9.179005867 | 10.65557933 | 7.544288867 | 7.699339867 | 9.2393621   | 10.43155933 | 7.631647933 | 7.853958333 |
| "Tbc1d17"  | 7.1201277   | 7.4099803   | 6.1637893   | 5.8510027   | 7.3643026   | 7.2469163   | 6.2520742   | 6.016634    |
| "Tbc1d19"  | 7.3210907   | 8.302298    | 7.953694    | 8.419323    | 7.5416365   | 7.5175233   | 7.673183    | 7.9162927   |
| "Tbc1d20"  | 7.25195965  | 7.32421175  | 7.169441    | 7.3024316   | 7.4507768   | 7.6301925   | 7.4613153   | 7.14980675  |
| "Tbc1d22a" | 5.1335239   | 5.1101088   | 5.0932976   | 5.5200005   | 5.2180807   | 4.9874553   | 5.1831645   | 5.35072155  |
| "Tbc1d23"  | 3.8209127   | 4.05311725  | 3.8253197   | 3.8718929   | 3.7144276   | 4.499453    | 3.7126104   | 3.87338715  |
| "Tbc1d24"  | 7.3821106   | 5.8643465   | 7.379995    | 7.165571    | 6.8230414   | 5.8443756   | 7.950372    | 7.2017775   |
| "Tbc1d8"   | 6.66814325  | 5.04364155  | 5.23316895  | 5.27455525  | 5.3545158   | 5.0574123   | 6.0052963   | 5.5218252   |
| "Tbc1d8b"  | 3.0603619   | 3.1861238   | 3.122773    | 3.271176    | 3.1360579   | 3.0775194   | 3.1286273   | 3.2599556   |
| "Tbca"     | 8.10294545  | 7.667474275 | 8.362816    | 8.436448175 | 8.109218075 | 7.91886405  | 8.408985825 | 8.44767245  |
| "Tbcb"     | 9.123037    | 9.1353245   | 9.397986    | 9.188822    | 8.968548    | 8.691593    | 7.989911    | 8.951172    |
| "Tbcc"     | 5.764097    | 5.982492    | 5.579248    | 5.7129407   | 5.7074847   | 5.6182165   | 5.6666675   | 5.3091726   |
| "Tbcd"     | 6.4020102   | 6.47747755  | 6.47741125  | 6.31606335  | 6.22804835  | 6.221567    | 6.6876454   | 6.1834428   |
| "Tbce"     | 8.50123     | 6.888917    | 8.547676    | 8.565153    | 8.651095    | 8.6363      | 8.624351    | 8.685992    |
| "Tbcel"    | 7.34155965  | 7.9946195   | 7.11094015  | 7.09259335  | 7.5963659   | 7.6171083   | 6.785748    | 7.2983045   |
| "Tbk1"     | 7.7258437   | 8.425491    | 7.00894375  | 7.42001895  | 8.0026865   | 8.718342    | 7.2703357   | 7.6556478   |
| "Tbl1x"    | 5.073828833 | 4.989994467 | 5.429629167 | 4.944119433 | 4.915062833 | 5.408564033 | 5.462720667 | 4.935570067 |
| "Tbl1xr1"  | 5.620535375 | 6.537854175 | 5.1574993   | 5.311597875 | 5.652801075 | 6.060799325 | 5.186116    | 5.2543966   |
| "Tbli2"    | 3.2400907   | 3.24556615  | 3.24345635  | 3.1862678   | 3.63857405  | 3.2093414   | 3.301325    | 3.2205593   |
| "Tbli3"    | 4.725297    | 5.2717104   | 4.7525573   | 4.8314      | 4.8723774   | 4.920294    | 4.768325    | 4.69786     |
| "Tbp"      | 3.60049725  | 4.12491155  | 3.6669443   | 3.86377825  | 3.8328533   | 4.0730245   | 3.6972857   | 3.8512089   |
| "Tbpl1"    | 7.7840233   | 7.148768    | 7.0809226   | 7.2337127   | 7.732017    | 7.5876937   | 7.7432156   | 7.2122216   |
| "Tbr1"     | 3.2435062   | 3.7430303   | 3.4369996   | 3.6620004   | 3.4686074   | 3.3406258   | 3.415568    | 3.5537515   |
| "Tbrg1"    | 9.278034    | 10.129878   | 8.872081    | 8.738234    | 9.186477    | 9.629453    | 9.044597    | 8.976213    |
| "Tbrg4"    | 3.486927967 | 3.551956733 | 3.2453634   | 3.604900633 | 3.428950167 | 3.438720667 | 3.420421967 | 3.401650933 |
| "Tbx1"     | 5.7398324   | 4.6102486   | 5.6223946   | 6.153134    | 6.849513    | 6.3277025   | 6.057705    | 5.8002224   |
| "Tbx15"    | 8.0539515   | 9.26350265  | 8.4118157   | 8.9327645   | 8.7422005   | 8.167757    | 8.13984935  | 8.46913915  |
| "Tbx18"    | 2.614093    | 2.7685337   | 2.730683    | 2.8245728   | 2.7207825   | 2.7013397   | 2.7292163   | 2.8174818   |
| "Tbx2"     | 2.73652     | 2.773559    | 2.7558026   | 2.805056    | 2.7467394   | 2.7383075   | 2.7285058   | 2.806034    |
| "Tbx20"    | 2.3894925   | 2.468365    | 2.4987092   | 2.5072174   | 2.4511046   | 2.4188051   | 2.464278    | 2.5120435   |
| "Tbx3"     | 3.64391675  | 3.44771985  | 3.4042065   | 3.507507    | 3.43738125  | 3.75064125  | 3.27429565  | 3.6007018   |
| "Tbx5"     | 2.3607597   | 2.579669    | 2.4429922   | 2.5078251   | 2.448429    | 2.4343152   | 2.4428422   | 2.5079653   |
| "Tbxas1"   | 3.948427    | 3.9866078   | 3.961525    | 4.0177193   | 3.9600198   | 3.912099    | 4.012851    | 4.0192766   |
| "Tc2n"     | 2.794526167 | 2.9958223   | 2.879314133 | 3.032621833 | 2.886821233 | 2.8169597   | 2.867805267 | 2.997826333 |
| "Tcap"     | 13.616464   | 14.5167675  | 14.048666   | 13.983516   | 14.271159   | 14.137512   | 13.8839245  | 13.914292   |
| "Tcea1"    | 6.51895955  | 6.8148425   | 6.52787435  | 6.1936017   | 6.70368     | 7.30864265  | 6.391722    | 6.4657138   |
| "Tcea2"    | 3.8215961   | 4.1927876   | 3.600702    | 3.6420832   | 3.5101273   | 3.753558    | 4.7653437   | 3.6710944   |
| "Tcea3"    | 10.291571   | 10.785515   | 11.376751   | 11.296843   | 10.53026    | 9.767967    | 11.068485   | 11.337332   |
| "Tceal1"   | 5.0504794   | 5.2362237   | 6.6788254   | 6.6584272   | 5.4246674   | 4.6490393   | 6.9534883   | 6.7161517   |

|            |             |             |             |             |             |             |             |             |
|------------|-------------|-------------|-------------|-------------|-------------|-------------|-------------|-------------|
| "Tceal3"   | 7.4231043   | 6.593377    | 7.9871383   | 7.56768     | 6.3978353   | 5.193978    | 7.503647    | 6.7620587   |
| "Tceal8"   | 7.5111833   | 6.980659    | 8.470316    | 7.8995943   | 7.8834653   | 7.0283055   | 8.283741    | 7.9387355   |
| "Tceb1"    | 7.893943775 | 8.72259625  | 9.00330385  | 9.175816675 | 8.45968865  | 8.3157739   | 8.579949125 | 9.089453825 |
| "Tceb2"    | 11.9562245  | 12.55080025 | 12.63069    | 12.549104   | 12.1695185  | 11.9471415  | 12.573455   | 12.384782   |
| "Tceb3"    | 7.37692925  | 7.69851325  | 7.62299135  | 7.897878    | 7.7235253   | 7.7635372   | 7.42468355  | 7.73454485  |
| "Tcerg1"   | 6.338320767 | 7.216033667 | 6.6176125   | 6.930067667 | 6.621821833 | 6.627926033 | 6.645047233 | 6.722913    |
| "Tcf12"    | 7.198589    | 7.1795928   | 7.36607865  | 7.3994825   | 7.297642    | 7.2848495   | 7.53993725  | 7.331482    |
| "Tcf15"    | 7.0632186   | 7.540085    | 7.858625    | 7.941904    | 7.532895    | 7.651955    | 7.6886916   | 8.034666    |
| "Tcf19"    | 3.1274      | 3.2025967   | 3.2223475   | 3.301265    | 3.2684383   | 3.160755    | 3.1765966   | 3.2983036   |
| "Tcf20"    | 4.3629389   | 4.60820355  | 4.57474875  | 4.38743195  | 4.56568715  | 4.6470406   | 4.37878945  | 4.441637    |
| "Tcf23"    | 2.6838207   | 2.8411207   | 2.759911    | 2.911215    | 2.7741017   | 2.710817    | 2.738967    | 2.843296    |
| "Tcf25"    | 8.225694075 | 8.790123875 | 8.3736414   | 8.4337728   | 8.29940425  | 8.55686925  | 8.22587325  | 8.31016575  |
| "Tcf3"     | 3.56419675  | 3.7585423   | 4.0471693   | 3.85442865  | 3.6786481   | 4.1919801   | 4.0545486   | 3.995023    |
| "Tcf4"     | 7.39477055  | 7.62988575  | 7.90719105  | 8.182118    | 7.701818683 | 7.72315633  | 7.835464367 | 8.2509691   |
| "Tcf7"     | 2.657749    | 2.7146692   | 2.6659474   | 2.8928382   | 2.6912708   | 5.198359    | 2.6793878   | 2.7728722   |
| "Tcf711"   | 5.6424812   | 7.28978335  | 6.02597765  | 5.9707551   | 6.50601145  | 6.7232015   | 6.0507264   | 5.890979    |
| "Tcf712"   | 3.898505533 | 3.750507067 | 3.831488967 | 4.033458767 | 3.857778533 | 3.933107267 | 3.875789467 | 4.0420774   |
| "Tcfl5"    | 2.7239456   | 2.8871353   | 2.8033957   | 2.9184418   | 2.8124566   | 2.764316    | 2.801827    | 2.9144197   |
| "Tchh"     | 3.2133899   | 3.503407    | 3.3423755   | 3.500093    | 3.3478549   | 3.2353435   | 3.294693    | 3.4523845   |
| "Tcirg1"   | 5.0118537   | 4.3527193   | 4.261002    | 3.9044285   | 4.641095    | 4.881733    | 5.2671137   | 4.231786    |
| "Tcl1b1"   | 2.4329662   | 2.5834327   | 2.512683    | 2.5881667   | 2.5131807   | 2.4869804   | 2.5051818   | 2.565393    |
| "Tcl1b3"   | 4.6691914   | 5.0958266   | 4.9018693   | 4.67308     | 4.6302047   | 4.465088    | 4.639186    | 4.6709433   |
| "Tcl1b4"   | 2.3138254   | 2.395586    | 2.3226595   | 2.432633    | 2.322215    | 2.2876718   | 2.32015     | 2.4147065   |
| "Tcn2"     | 6.030789    | 4.444602    | 5.1326947   | 4.2325745   | 6.6765413   | 7.7185354   | 6.123143    | 4.6622415   |
| "Tcof1"    | 5.2125336   | 7.508297833 | 5.80340133  | 6.5148479   | 5.6492671   | 6.252235267 | 6.280916033 | 6.125716233 |
| "Tcpl1"    | 11.447609   | 11.837173   | 11.699062   | 11.589055   | 11.586492   | 11.652511   | 11.884346   | 11.529797   |
| "Tcpl10a"  | 2.731348767 | 2.936903533 | 2.8033261   | 3.0202602   | 2.813811633 | 2.729842133 | 2.774158833 | 2.9028503   |
| "Tcpl10b"  | 3.1191077   | 3.2436962   | 3.1054003   | 3.306625    | 3.1175168   | 3.0046432   | 3.0844934   | 3.2321506   |
| "Tcrb-j"   | 2.325626117 | 2.409239483 | 2.360125233 | 2.448165067 | 2.360334117 | 3.570507667 | 2.360222267 | 2.4345303   |
| "Tcrg-V4"  | 2.6317589   | 2.7837059   | 2.6963892   | 2.832636933 | 2.7065316   | 3.065198867 | 2.698132733 | 2.801059867 |
| "Tcstv1"   | 2.4015694   | 2.5002236   | 2.445068    | 2.5511866   | 2.4487758   | 2.4090223   | 2.4424553   | 2.5389585   |
| "Tcta"     | 6.58052175  | 6.971415975 | 6.181169025 | 6.32552715  | 6.973739575 | 7.362329825 | 6.261040425 | 6.26391675  |
| "Tcte1"    | 2.3009632   | 2.3959093   | 2.3482807   | 2.4705517   | 2.3508005   | 2.3204012   | 2.3484788   | 2.4259665   |
| "Tctex1d1" | 2.8830109   | 3.0022244   | 2.8925605   | 3.0695512   | 2.906093    | 2.8284369   | 2.8917968   | 3.0243065   |
| "Tctn3"    | 2.8184867   | 2.8845491   | 3.357826    | 2.9339685   | 2.8492074   | 2.891776    | 2.7036233   | 3.6093442   |
| "Tdgf1"    | 2.829391    | 3.0852308   | 2.9558222   | 3.0875716   | 2.960532    | 2.8892205   | 2.9547782   | 3.0862603   |
| "Tdo2"     | 10.448446   | 2.48644865  | 3.45094525  | 2.44580725  | 2.44594155  | 2.39347995  | 2.41357675  | 2.52225515  |
| "Tdp1"     | 2.2414262   | 2.3406649   | 2.2518754   | 2.624252    | 2.359927    | 2.354376    | 2.3558567   | 2.4191644   |
| "Tdp2"     | 7.9008822   | 7.478063    | 7.770266    | 7.9311156   | 8.178645    | 7.62828     | 7.640585    | 8.025316    |
| "Tdrd1"    | 2.3863323   | 2.5420675   | 2.4484026   | 2.5449557   | 2.44934     | 2.385101    | 2.4374323   | 2.5315037   |
| "Tdrd3"    | 7.166944    | 7.030445    | 7.188631    | 7.148969    | 7.3562117   | 7.56211     | 6.949876    | 7.2300625   |
| "Tdrd7"    | 6.6779995   | 6.568262    | 7.3088455   | 6.818094    | 7.0319304   | 7.0718617   | 7.2279844   | 6.9887695   |
| "Tead1"    | 2.8043265   | 3.0129128   | 2.8936424   | 3.0879586   | 2.9005308   | 2.8560243   | 2.875182    | 3.0035594   |
| "Tead2"    | 2.6561542   | 3.0089445   | 2.7037778   | 2.8428078   | 2.7048535   | 2.598423    | 2.7029858   | 2.7926335   |
| "Tead3"    | 3.7843761   | 4.012183    | 3.9977295   | 3.8478088   | 3.8963976   | 3.6270986   | 3.7165997   | 3.5859175   |
| "Tead4"    | 2.707116    | 2.75455795  | 2.94378675  | 2.8217384   | 2.7228532   | 2.7436315   | 2.7442149   | 2.77280055  |
| "Tec"      | 6.4234066   | 6.074628    | 6.30791     | 5.099703    | 6.7840395   | 6.901622    | 5.8544517   | 5.262474    |
| "Tecpr1"   | 5.2789185   | 6.03027785  | 5.6291463   | 5.343107    | 5.64903585  | 6.093037    | 5.9161915   | 5.5837388   |
| "Tecer"    | 9.8519515   | 10.0689795  | 9.4431075   | 9.7325125   | 9.2140565   | 8.72814665  | 10.0267595  | 9.53733725  |
| "Tecta"    | 2.316564    | 2.361496    | 2.3272805   | 2.4224622   | 2.3217447   | 2.2937644   | 2.3221378   | 2.6574233   |
| "Tef"      | 5.243362    | 6.418475367 | 6.330271267 | 6.4514352   | 6.432256733 | 5.9466501   | 6.208426767 | 6.6102529   |
| "Tek"      | 7.6412764   | 7.1693845   | 8.218079    | 8.227785    | 8.497444    | 8.355911    | 8.077977    | 8.653369    |
| "Tek11"    | 3.731254    | 7.390697    | 3.0381243   | 3.8537197   | 3.2873383   | 6.1318626   | 5.805107    | 3.4549708   |
| "Telo2"    | 4.9255867   | 4.805937433 | 5.301225867 | 5.448878933 | 5.096714833 | 4.7573506   | 5.249335433 | 5.504383633 |
| "Tenc1"    | 8.052356    | 9.265005    | 7.223433    | 6.8224845   | 8.71968     | 8.728199    | 7.889144    | 7.5261416   |
| "Tep1"     | 6.643249    | 6.4323726   | 6.832895    | 6.44472     | 6.855466    | 6.7349315   | 6.997443    | 6.6748753   |
| "Terf1"    | 4.27324025  | 4.7079915   | 3.8962891   | 4.1296809   | 4.52441415  | 4.5990765   | 3.91155725  | 4.14027965  |
| "Terf2"    | 6.912534    | 7.10095     | 7.0579267   | 7.107996    | 6.9189024   | 7.190211    | 7.117293    | 7.1330357   |
| "Terf2ip"  | 5.0574771   | 5.7025111   | 5.0141815   | 5.5183268   | 5.2565615   | 4.98408215  | 4.83124075  | 5.3728845   |
| "Tert"     | 2.2736106   | 2.326528    | 2.313217    | 2.4687927   | 2.3250878   | 2.269652    | 2.3199584   | 2.3651178   |
| "Tes"      | 2.58409295  | 2.7769255   | 2.5962161   | 2.40350635  | 2.7097775   | 3.1433511   | 2.58158935  | 2.5142995   |
| "Tes3-ps"  | 2.5342607   | 3.378959    | 4.3948183   | 4.0044413   | 3.4232097   | 3.2467618   | 3.735755    | 4.0300846   |
| "Tesc"     | 2.624345    | 2.8189073   | 2.8440568   | 2.8716347   | 2.7915676   | 2.8190186   | 2.8919425   | 3.6061885   |
| "Task1"    | 6.3743486   | 6.8515253   | 6.793975    | 6.992287    | 6.3305216   | 6.0972295   | 6.8396177   | 6.8095136   |
| "Task2"    | 3.1677196   | 2.7420335   | 2.741321    | 2.7689497   | 2.671872    | 2.7335787   | 2.7387109   | 2.758437    |
| "Tet1"     | 3.3329408   | 3.4570003   | 3.315795    | 3.3917055   | 3.3413365   | 3.3244839   | 3.270449    | 3.4009683   |
| "Tex10"    | 7.9774805   | 8.684248    | 7.38262285  | 7.7357138   | 8.1409697   | 8.43590765  | 7.464608    | 7.89611975  |
| "Tex11"    | 2.6086016   | 2.880996    | 2.7154915   | 2.863092    | 2.713917    | 2.6723285   | 2.7125785   | 2.8152165   |
| "Tex12"    | 2.3443413   | 2.4702117   | 2.3622255   | 2.4498699   | 2.36301     | 2.3189027   | 2.363       | 2.4769218   |
| "Tex13"    | 2.6037824   | 2.7793608   | 2.726115    | 2.8446546   | 2.716635    | 2.62205     | 2.6981063   | 2.816862    |
| "Tex16"    | 2.4221678   | 2.5262752   | 2.466839    | 2.5725148   | 2.4712536   | 2.4384418   | 2.4663866   | 2.5741897   |
| "Tex18"    | 2.349454    | 2.4810727   | 2.379597    | 2.492307    | 2.3879654   | 2.3412364   | 2.3823683   | 2.4550498   |
| "Tex19.2"  | 2.4467144   | 2.4935493   | 2.468515    | 2.5569735   | 2.452227    | 2.448056    | 2.4426062   | 2.5285535   |
| "Tex2"     | 9.441438    | 9.056315    | 9.221618    | 9.575186    | 9.064259    | 8.9311695   | 9.6103735   | 9.514652    |
| "Tex21"    | 3.0364964   | 3.3225666   | 3.1657084   | 3.27790615  | 3.15008545  | 3.07545125  | 3.1388447   | 3.2377583   |
| "Tex261"   | 5.736827    | 5.960927933 | 5.957727867 | 6.042004333 | 5.791169967 | 5.643405567 | 6.025606333 | 6.217516833 |
| "Tex264"   | 7.7143354   | 7.8489027   | 7.7076135   | 7.2401633   | 7.9111586   | 8.184715    | 7.5659103   | 7.493022    |
| "Tex9"     | 2.84504995  | 3.0430522   | 2.91887915  | 3.075729    | 2.91813085  | 2.85870755  | 2.9180217   | 3.0071322   |
| "Tfam"     | 8.938185    | 9.090536    | 9.91172     | 9.90117     | 9.406574    | 8.595134    | 9.158424    | 10.196497   |
| "Tfap2a"   | 2.3595912   | 2.481432    | 2.3869007   | 2.5486321   | 2.3890016   | 2.3456202   | 2.3835514   | 2.4709048   |
| "Tfap2c"   | 2.687323033 | 2.814500267 | 2.759772267 | 2.852032967 | 2.731918267 | 2.6736923   | 2.7237072   | 2.830549967 |

|            |             |             |             |             |             |             |             |             |
|------------|-------------|-------------|-------------|-------------|-------------|-------------|-------------|-------------|
| "Tfap2d"   | 2.4035168   | 2.525309    | 2.4957814   | 2.5877385   | 2.4962344   | 2.4459343   | 2.465033    | 2.582428    |
| "Tfap4"    | 3.704357    | 3.7747922   | 3.7670102   | 3.8179016   | 3.7698128   | 3.709823    | 3.7634287   | 3.8192058   |
| "Tfb1m"    | 5.50792265  | 5.5916303   | 5.6767488   | 5.755357    | 5.90499975  | 5.16557065  | 5.9212873   | 5.9936692   |
| "Tfb2m"    | 9.511076    | 10.2188015  | 9.723536    | 9.7726345   | 9.726505    | 9.732752    | 9.639285    | 9.856001    |
| "Tfcp2"    | 3.4738905   | 3.5715125   | 3.78036     | 3.753764    | 3.7282512   | 3.7447023   | 4.0339966   | 4.047077    |
| "Tfcp2l1"  | 3.851373533 | 5.376078167 | 3.310142967 | 4.209521867 | 3.8214675   | 4.8551329   | 3.263003633 | 4.020954267 |
| "Tfdp1"    | 8.134121    | 8.616255    | 8.964896    | 8.849256    | 8.14497     | 8.240783    | 8.530903    | 8.852406    |
| "Tfeb"     | 5.6627817   | 6.381709    | 6.66965     | 7.0249095   | 6.36515     | 5.8885527   | 6.6766405   | 6.4265804   |
| "Tfec"     | 2.382143    | 2.4185066   | 2.378148    | 2.4433677   | 2.3876379   | 2.3739207   | 2.3882453   | 2.4454718   |
| "Tff2"     | 2.9213493   | 2.9984796   | 3.0098803   | 3.7323146   | 2.999019    | 2.9583926   | 2.9268005   | 3.0445013   |
| "Tff3"     | 8.2347145   | 2.1360438   | 2.1058118   | 2.1715155   | 2.103503    | 2.0727696   | 2.099701    | 2.1765747   |
| "Tfg"      | 8.763758    | 9.160995    | 9.27167     | 9.475012    | 9.052684    | 9.16808     | 9.049473    | 9.097495    |
| "Tfip11"   | 6.2638772   | 6.77348165  | 5.91841485  | 6.3262413   | 6.37493755  | 6.25774035  | 6.0765923   | 6.5048927   |
| "Tfpi"     | 3.206546233 | 2.791272167 | 3.077981167 | 2.8873972   | 3.074927533 | 3.178555867 | 3.250382567 | 3.257694967 |
| "Tfpi2"    | 5.565297    | 2.5315633   | 2.5031755   | 2.582183    | 2.5115921   | 2.4476974   | 2.5279214   | 2.6152108   |
| "Tfpt"     | 3.65475115  | 4.1692716   | 4.156105825 | 4.04265295  | 4.0600548   | 3.99202545  | 3.70325155  | 4.00235875  |
| "Tfr2"     | 8.42833015  | 2.3542301   | 2.599747    | 2.37694465  | 2.4031853   | 2.2817078   | 2.30696875  | 2.516505    |
| "Tfrc"     | 4.0810789   | 4.00113738  | 4.4982399   | 4.79571158  | 4.10181996  | 3.79985046  | 4.44571974  | 4.6262952   |
| "Tgds"     | 6.900264    | 5.4849305   | 5.5520277   | 5.684877    | 5.83859     | 5.383381    | 6.0233173   | 5.9048576   |
| "Tgfa"     | 3.224708    | 2.444431    | 2.4088595   | 2.532027    | 2.5028024   | 2.9199188   | 2.4070408   | 2.49222     |
| "Tgfb1i1"  | 4.755766    | 4.884948    | 5.2756686   | 5.0419707   | 4.9090376   | 4.925924    | 4.940614    | 4.975736    |
| "Tgfb2"    | 5.985203567 | 7.421833767 | 7.628691633 | 7.646526333 | 6.6125328   | 5.200186067 | 7.647604667 | 7.39275933  |
| "Tgfb3"    | 7.7779126   | 7.06037     | 7.628602    | 7.7073307   | 7.2507625   | 6.6528964   | 7.8073416   | 7.6497107   |
| "Tgfbf1"   | 8.00060605  | 7.013848375 | 9.174522    | 8.080448    | 9.13383225  | 9.014478    | 8.664781    | 8.3767878   |
| "Tgfbf1"   | 6.210327    | 6.4481288   | 6.0216398   | 6.0707669   | 6.2196928   | 6.0234855   | 6.10545665  | 6.1409828   |
| "Tgfbf2"   | 4.9354794   | 4.8556044   | 5.021978333 | 4.929645233 | 5.0686794   | 5.287625433 | 5.065150833 | 4.9656147   |
| "Tgfbf3"   | 2.0928981   | 2.1437392   | 2.108451    | 2.175453    | 2.116012    | 2.4358253   | 2.073105    | 2.19097     |
| "Tgfi1"    | 8.044914    | 8.092514    | 4.548755    | 4.774921    | 6.6858497   | 7.764545    | 6.125613    | 5.1937227   |
| "Tgfi2"    | 2.4112458   | 2.431232    | 2.4224386   | 2.4748206   | 2.4194908   | 2.4026484   | 2.4180923   | 2.477565    |
| "Tgfi2lx1" | 2.5426328   | 2.6427138   | 2.5864131   | 2.7139993   | 2.5999978   | 2.5665743   | 2.595505    | 2.7001278   |
| "Tgm1"     | 3.1324916   | 2.532155    | 2.5282297   | 2.592234    | 2.5150244   | 2.5035362   | 2.519577    | 2.5770044   |
| "Tgm2"     | 8.449173833 | 8.1033941   | 7.9735985   | 7.679293567 | 8.152797783 | 8.525659917 | 8.218318667 | 7.719915417 |
| "Tgm3"     | 2.4572387   | 2.5120738   | 2.4812627   | 2.5672104   | 2.4779768   | 2.449551    | 2.475309    | 2.55362     |
| "Tgln1"    | 6.3763917   | 6.4167304   | 5.661736025 | 5.877482075 | 6.2928162   | 6.714704225 | 6.19012075  | 5.90335975  |
| "Tgs1"     | 5.4795045   | 5.854442325 | 5.719659925 | 5.655170425 | 5.5947485   | 5.668175125 | 5.841821275 | 5.808923275 |
| "Tgtp1"    | 7.4020085   | 6.0096254   | 7.2230177   | 7.881733    | 6.7954364   | 7.6119237   | 8.861017    | 7.9184422   |
| "Th11"     | 6.7349787   | 6.948618    | 6.799213    | 7.176687    | 6.9639316   | 6.864983    | 7.012704    | 7.216787    |
| "Tha1"     | 3.1080563   | 2.9019296   | 3.2460263   | 4.105097    | 3.3961015   | 3.1146386   | 3.5197437   | 3.2722554   |
| "Thap11"   | 7.3408303   | 7.231624    | 7.679899    | 7.7146106   | 7.645482    | 7.312386    | 7.456053    | 7.62784     |
| "Thap2"    | 3.1811142   | 3.25161     | 3.186884    | 3.2757244   | 3.1636734   | 3.0874586   | 3.3143196   | 3.32706     |
| "Thap4"    | 8.771064    | 9.255704    | 9.297433    | 9.454324    | 9.33106     | 8.571676    | 9.161925    | 9.250102    |
| "Thap7"    | 5.7812536   | 6.17706585  | 6.0747145   | 6.2755633   | 6.0357665   | 5.9542905   | 6.13933995  | 6.038084    |
| "Thbd"     | 7.260427    | 6.246391    | 7.342495    | 6.8000927   | 6.854869    | 7.667645    | 7.185039    | 7.0612726   |
| "Thbs1"    | 6.514807833 | 6.072292833 | 7.5042741   | 5.7446963   | 6.380013267 | 6.1174982   | 5.384554667 | 6.49421667  |
| "Thbs2"    | 4.4755088   | 5.6671572   | 9.2812325   | 6.89242325  | 9.018071    | 8.3836085   | 6.8723435   | 7.59145885  |
| "Thbs3"    | 4.5495906   | 2.680304    | 5.868827    | 4.435946    | 5.6925287   | 4.7363496   | 4.689977    | 4.6785216   |
| "Thbs4"    | 10.736632   | 10.583575   | 12.438524   | 11.484727   | 10.89321    | 10.681314   | 10.482129   | 11.596549   |
| "Them4"    | 4.9169054   | 4.7311153   | 5.3306184   | 6.417688    | 4.5732      | 3.8451214   | 5.302163    | 6.4230237   |
| "Thnsl1"   | 3.4587754   | 3.8451235   | 3.76278865  | 3.88615965  | 4.21050265  | 3.5689322   | 3.99798285  | 3.810539    |
| "Thnsl2"   | 5.0247297   | 4.772125    | 4.981222    | 4.856153    | 4.9262457   | 4.398381    | 4.354008    | 4.7391057   |
| "Thoc1"    | 5.670146125 | 6.30833925  | 5.9894573   | 6.200972825 | 6.0250233   | 5.9126678   | 5.896148175 | 6.13473555  |
| "Thoc2"    | 6.045743    | 6.18912485  | 6.2841935   | 6.32092535  | 6.0956891   | 6.3596158   | 6.3162434   | 6.397904    |
| "Thoc3"    | 5.052093    | 5.4025712   | 5.2902352   | 5.29144165  | 5.44647025  | 5.3286688   | 5.2455989   | 5.2208525   |
| "Thoc6"    | 5.6111917   | 5.7569256   | 6.028885    | 5.7931957   | 5.8769174   | 5.1750174   | 5.638078    | 5.8562665   |
| "Thoc7"    | 6.84974335  | 7.0801449   | 7.12348325  | 7.4062468   | 6.96501235  | 6.85080695  | 7.08790045  | 7.4819005   |
| "Thop1"    | 5.224561    | 5.8387175   | 5.2244124   | 5.166225    | 5.1019125   | 4.458529    | 5.586553    | 5.2540894   |
| "Thra"     | 5.74883555  | 6.96426295  | 6.74504995  | 6.86988835  | 6.64775165  | 6.19323365  | 6.47928765  | 6.90088075  |
| "Thrap3"   | 6.636517333 | 6.871098767 | 6.3497503   | 6.196194733 | 6.428731233 | 6.839078667 | 6.075485033 | 6.009733967 |
| "Thrsp"    | 7.33205285  | 7.3069215   | 7.8929105   | 6.84223415  | 9.058477    | 8.1200035   | 11.94574    | 7.983613    |
| "Thsd1"    | 3.3882506   | 3.4769943   | 3.4013555   | 3.458025    | 3.409255    | 3.3812912   | 3.394907    | 3.4963033   |
| "Thtpa"    | 6.3994177   | 7.07065225  | 6.66683085  | 6.71733885  | 6.62469935  | 6.3348337   | 6.2073668   | 6.8969043   |
| "Thumpd1"  | 7.5958695   | 8.628108    | 7.6061964   | 7.8911905   | 7.9689484   | 7.8034525   | 7.5872383   | 7.677907    |
| "Thumpd3"  | 5.31829785  | 5.3949125   | 5.05107965  | 5.07391855  | 5.31801115  | 5.2551808   | 5.1662303   | 5.2433846   |
| "Thy1"     | 3.8140497   | 3.3450766   | 7.2169237   | 5.565529    | 5.099287    | 5.9516287   | 5.0357585   | 5.6837983   |
| "Thyn1"    | 6.8964222   | 7.14622365  | 7.2727255   | 6.85933685  | 6.07585475  | 5.9505906   | 7.51893365  | 6.70982615  |
| "Tia1"     | 6.648468733 | 6.6307654   | 7.8160451   | 7.639908333 | 6.802826    | 6.8790045   | 7.472644333 | 7.432254667 |
| "Tiaf2"    | 3.0085564   | 3.1027648   | 3.082806    | 3.161608    | 3.0812945   | 2.7782698   | 3.0716362   | 3.1547623   |
| "Tial1"    | 6.89146695  | 6.8341334   | 6.37350335  | 6.462279375 | 6.69076045  | 6.667328375 | 6.68295505  | 6.667135075 |
| "Tiam1"    | 3.577494    | 3.6162858   | 5.386314    | 5.928557    | 3.8009305   | 3.8340116   | 3.586116    | 4.826171    |
| "Tiam2"    | 3.29951165  | 3.05316295  | 2.92570845  | 2.9890428   | 2.93246     | 3.0103089   | 2.868863    | 2.8972333   |
| "Tie1"     | 2.540069    | 2.6916523   | 2.6718612   | 3.0608234   | 2.5996137   | 2.4383326   | 2.6855206   | 2.7397056   |
| "Tifa"     | 5.5893993   | 2.1743495   | 2.178267    | 2.1781626   | 2.342712    | 4.2364388   | 2.153008    | 2.1856227   |
| "Tigd5"    | 3.6831746   | 4.565084    | 4.4848375   | 4.2968454   | 4.7571115   | 4.1876955   | 3.9635239   | 3.9921339   |
| "Timd2"    | 4.6577005   | 2.3099558   | 2.2873008   | 2.3660023   | 2.2726831   | 2.2373776   | 2.268144    | 2.3568323   |
| "Timeless" | 4.022402    | 3.9563363   | 4.630202    | 5.150288    | 4.4465504   | 4.6147285   | 5.5872912   | 5.5540032   |
| "Timm10"   | 11.029085   | 11.565235   | 9.397544    | 10.02877    | 11.177837   | 11.591537   | 9.84195     | 9.768249    |
| "Timm13"   | 10.945011   | 10.908398   | 11.028659   | 11.104413   | 10.716681   | 10.604227   | 11.174454   | 10.800465   |
| "Timm17a"  | 11.087386   | 11.336598   | 11.4576025  | 11.6355     | 11.388089   | 10.991178   | 11.604019   | 11.33648    |
| "Timm17b"  | 8.1004671   | 7.8052648   | 8.5474615   | 8.5358522   | 7.8451965   | 7.5225545   | 8.47115235  | 8.3387425   |
| "Timm22"   | 5.3071874   | 5.2231948   | 5.4598046   | 5.5988126   | 5.16309535  | 4.9074532   | 5.495545    | 5.89401165  |
| "Timm23"   | 12.4367     | 12.5865135  | 12.879598   | 12.987285   | 12.6421175  | 12.477606   | 13.025444   | 12.7837515  |

|            |             |             |             |             |             |             |             |             |
|------------|-------------|-------------|-------------|-------------|-------------|-------------|-------------|-------------|
| "Timm44"   | 8.766109667 | 9.058468333 | 8.819524    | 9.041716167 | 8.968288    | 8.722528    | 8.753574333 | 9.021689833 |
| "Timm50"   | 7.8616867   | 8.194528    | 8.03196     | 8.3487      | 7.995127    | 7.724913    | 7.9842815   | 8.12823     |
| "Timm8a1"  | 7.48029     | 6.7098155   | 6.41948085  | 6.8497385   | 6.95169765  | 6.4121573   | 7.215622    | 6.6892627   |
| "Timm8a2"  | 2.9227908   | 3.2366078   | 3.035471    | 3.2236245   | 3.0555394   | 2.951432    | 3.02847     | 3.1796532   |
| "Timm8b"   | 10.94227    | 11.430539   | 11.272394   | 11.292378   | 11.050364   | 10.639446   | 11.364748   | 11.189993   |
| "Timm9"    | 6.06644725  | 6.86746645  | 6.1992292   | 6.34729915  | 6.13566635  | 5.94091605  | 6.3000638   | 6.4632755   |
| "Timp1"    | 4.3361483   | 2.6434205   | 4.8772326   | 2.9754755   | 2.6019633   | 2.1147606   | 5.05206     | 4.526263    |
| "Timp2"    | 6.851256117 | 6.692515667 | 7.870284217 | 7.44417015  | 7.52443205  | 7.319038867 | 7.11462295  | 7.462645783 |
| "Timp3"    | 7.306478325 | 7.6257707   | 7.67026705  | 7.5768545   | 7.8657603   | 8.0423006   | 7.5835381   | 7.7261325   |
| "Timp4"    | 8.54240525  | 8.1323181   | 8.05413975  | 8.5549085   | 8.818518    | 9.2892075   | 8.9021015   | 8.917804    |
| "Tinag"    | 2.2491622   | 2.3347385   | 2.31681     | 3.4082913   | 2.2917995   | 2.267357    | 2.4751704   | 2.383827    |
| "Tinag1"   | 5.7659903   | 5.501565    | 4.538997    | 4.3850536   | 5.19987     | 6.2821026   | 4.5650864   | 4.389319    |
| "Tinf2"    | 6.24405     | 6.7521343   | 6.6574407   | 6.9759545   | 6.345796    | 6.111542    | 6.8065867   | 6.78529     |
| "Tiparp"   | 9.466766667 | 10.74086233 | 8.4144221   | 8.300986    | 9.126047667 | 11.377663   | 8.370359    | 8.481734567 |
| "Tipin"    | 7.340742    | 7.6115856   | 8.070025    | 8.046115    | 7.41418     | 7.3440495   | 7.9278      | 8.049902    |
| "Tiprl"    | 8.27796     | 8.236882    | 8.008932    | 7.81143305  | 7.88135415  | 8.272302    | 8.0835445   | 7.73961965  |
| "Tirap"    | 5.9070926   | 5.6759597   | 7.0014305   | 6.69889285  | 5.82171825  | 5.08176585  | 6.7889698   | 6.7182542   |
| "Tjap1"    | 7.3814363   | 8.3764      | 7.0798845   | 7.1712646   | 7.5056515   | 7.7699313   | 7.1133127   | 7.240513    |
| "Tjp1"     | 8.426257    | 8.293384    | 8.837002    | 9.013412    | 9.218676    | 9.035133    | 9.096302    | 9.507519    |
| "Tjp2"     | 4.646384175 | 4.331237475 | 4.424884675 | 4.3830913   | 4.61200775  | 4.6842338   | 4.617523375 | 4.42177925  |
| "Tjp3"     | 2.0736206   | 2.4804015   | 2.1392903   | 2.2020671   | 2.1404104   | 2.081427    | 2.1271653   | 2.1984606   |
| "Tk1"      | 2.2497034   | 2.3129416   | 2.7280302   | 2.645731    | 2.2501612   | 1.9892217   | 2.3079762   | 2.4778004   |
| "Tk2"      | 5.2107615   | 5.2533064   | 4.7057223   | 4.8542094   | 5.3395653   | 5.7649164   | 4.750468    | 4.853854    |
| "Tkt"      | 8.43193625  | 7.3446368   | 9.4400885   | 7.31257725  | 9.08321035  | 9.1915575   | 12.3759035  | 8.4721995   |
| "Tktl1"    | 2.5154867   | 2.6357117   | 2.5664191   | 2.7025132   | 2.576725    | 2.5411167   | 2.5733242   | 2.6858182   |
| "Tlcd1"    | 2.939722867 | 2.8883116   | 2.982479633 | 2.983690667 | 3.3075212   | 2.908116467 | 3.403680167 | 2.941982633 |
| "Tlcd2"    | 4.0449014   | 3.3295326   | 4.4974613   | 3.3139436   | 3.3120437   | 2.9244552   | 3.8301578   | 3.2070417   |
| "Tle1"     | 8.929634    | 9.7302665   | 6.907902    | 6.8802514   | 7.6987362   | 9.6686125   | 7.5312995   | 6.9021173   |
| "Tle2"     | 2.2192547   | 2.4224422   | 2.5746384   | 3.2292004   | 2.3763049   | 2.322304    | 2.4034307   | 2.4701228   |
| "Tle3"     | 3.4893461   | 3.619977167 | 3.724644467 | 3.7735213   | 3.709865    | 4.016345133 | 3.738019367 | 3.6221171   |
| "Tle4"     | 6.14179685  | 7.33011185  | 5.4142183   | 5.58196265  | 5.9602187   | 7.00155795  | 5.502694    | 5.55139625  |
| "Tle6"     | 3.7808154   | 4.97        | 4.8745985   | 4.952116    | 3.9525166   | 3.3980002   | 4.7743764   | 4.755893    |
| "Tlk2"     | 7.112687333 | 8.2184182   | 6.815462467 | 7.214845    | 7.4347472   | 7.530160333 | 6.7404898   | 6.967361067 |
| "Tll1"     | 2.542944    | 2.6968298   | 2.6205373   | 2.7379663   | 2.6326041   | 2.5581632   | 2.6198692   | 2.7600887   |
| "Tln1"     | 6.941979    | 6.98908945  | 6.98028935  | 7.07307285  | 7.2252605   | 7.04997785  | 7.144018    | 6.98919295  |
| "Tlr1"     | 2.684444    | 2.6632779   | 2.7130356   | 2.8305511   | 2.5768301   | 5.0129433   | 2.7200294   | 2.8063116   |
| "Tlr2"     | 2.7867887   | 2.4992123   | 2.7228844   | 2.7718832   | 2.7174      | 2.988199    | 2.9105701   | 2.6715465   |
| "Tlr3"     | 2.9864268   | 3.1876817   | 3.1673536   | 3.30575145  | 3.279861    | 3.36648215  | 3.2500663   | 3.31470135  |
| "Tlr4"     | 6.3083323   | 4.4188635   | 4.41036585  | 3.8997401   | 5.701967    | 5.9807245   | 5.00262715  | 4.49803485  |
| "Tlr7"     | 2.646084367 | 2.702727167 | 2.623249833 | 2.741918033 | 2.644019433 | 2.830168067 | 2.653646533 | 2.614315033 |
| "Tlx1"     | 2.334491    | 2.3798773   | 2.355567    | 2.4655883   | 2.360014    | 2.3127627   | 2.354071    | 2.4714065   |
| "Tmd1"     | 6.04233535  | 6.2799485   | 6.690503    | 7.0269095   | 6.1811108   | 5.773209    | 6.6501955   | 7.2153235   |
| "Tmd2"     | 9.002794571 | 8.972308143 | 9.227780957 | 9.441470429 | 9.044635286 | 9.026079957 | 9.234097857 | 9.474339714 |
| "Tmd3"     | 5.9326406   | 5.6427402   | 6.4103346   | 5.967763    | 6.408953    | 5.588042    | 6.5143847   | 6.0574775   |
| "Tmd4sf1"  | 5.3397079   | 5.04163685  | 5.47669315  | 5.5082913   | 5.4498603   | 5.4763844   | 5.7739427   | 5.4504816   |
| "Tmd4sf20" | 2.312767    | 2.4034693   | 2.3733275   | 2.4637675   | 2.3817916   | 2.368857    | 2.3805604   | 2.4545884   |
| "Tmd4sf4"  | 8.514703    | 2.9671478   | 2.9616733   | 3.0535347   | 3.0447237   | 2.9294329   | 2.9549305   | 3.0303946   |
| "Tmd6sf1"  | 7.58925655  | 5.36912     | 6.72389615  | 6.91378635  | 7.4132793   | 7.85685775  | 7.57525735  | 7.267762    |
| "Tmd6sf2"  | 2.7417932   | 1.9295167   | 1.912364    | 1.9727609   | 1.9118826   | 1.8913996   | 1.9107169   | 1.9739999   |
| "Tmd7sf2"  | 7.2457557   | 4.4707108   | 5.121188    | 4.792883    | 4.608005    | 3.7276278   | 3.96157     | 4.732764    |
| "Tmd7sf3"  | 4.969272667 | 4.234376233 | 4.893070067 | 4.796024467 | 4.639641033 | 4.4151792   | 4.871778267 | 5.043994667 |
| "Tmd9sf2"  | 9.655421667 | 9.357879667 | 9.680456767 | 9.847045333 | 9.778741167 | 9.606183133 | 9.722588    | 9.995461    |
| "Tmd9sf3"  | 6.685677533 | 6.854413633 | 7.104163933 | 7.034429333 | 6.888844033 | 7.268632133 | 6.984608133 | 7.074814167 |
| "Tmd9sf4"  | 4.49040785  | 4.32450785  | 4.6429157   | 4.4633476   | 4.4452145   | 4.47422015  | 4.8649938   | 4.4888415   |
| "Tmbim1"   | 9.997625    | 10.4518585  | 8.866782    | 8.349166    | 9.989001    | 10.889395   | 9.284644    | 8.690977    |
| "Tmbim4"   | 8.6115      | 8.47969     | 8.440539    | 8.597227    | 8.258992    | 8.243595    | 8.821365    | 8.296886    |
| "Tmbim6"   | 10.851597   | 10.639729   | 10.523989   | 10.2689295  | 10.65484    | 10.456572   | 10.402156   | 10.23936    |
| "Tmc1"     | 2.645474    | 2.7259598   | 2.6805255   | 2.8816533   | 2.687763    | 2.6423051   | 2.6739686   | 2.758884    |
| "Tmc6"     | 4.8758354   | 3.1784582   | 3.0761054   | 3.3414123   | 3.3486564   | 4.2262826   | 3.3576396   | 3.3976195   |
| "Tmcc2"    | 8.392495    | 9.052074    | 8.6036855   | 8.8165075   | 8.22818     | 8.7837735   | 8.54787375  | 8.7721485   |
| "Tmcc3"    | 5.2452683   | 2.8679318   | 2.2363205   | 2.3769484   | 2.3224478   | 3.894782    | 2.2541652   | 2.352786    |
| "Tmco1"    | 9.779033    | 9.369622    | 9.899695    | 9.896246    | 9.730992    | 9.474644    | 9.989313    | 9.894418    |
| "Tmco3"    | 5.850051    | 5.735347    | 6.6934724   | 6.250014    | 5.9431357   | 5.4331603   | 6.3048005   | 6.2328734   |
| "Tmco4"    | 3.4491177   | 3.8544307   | 3.3500764   | 3.4258854   | 3.843109    | 3.321018    | 3.812311    | 3.594637    |
| "Tmco5"    | 2.4057999   | 2.4794817   | 2.4254296   | 2.5424414   | 2.4268146   | 2.404516    | 2.4126694   | 2.4993086   |
| "Tmco6"    | 5.0646296   | 5.7472477   | 4.2453866   | 3.6081316   | 4.996179    | 5.861073    | 4.175785    | 4.0930605   |
| "Tmed1"    | 6.625982    | 6.92182     | 7.57272     | 7.469977    | 6.764103    | 6.5263424   | 6.9757338   | 7.409688    |
| "Tmed10"   | 9.695768    | 10.045777   | 10.344587   | 10.097047   | 10.009422   | 9.653479    | 10.188351   | 10.0370245  |
| "Tmed11"   | 3.0147493   | 3.1851053   | 3.0839038   | 3.2441528   | 3.0983603   | 3.0440757   | 3.0894094   | 3.1678295   |
| "Tmed2"    | 10.59104533 | 10.55992312 | 10.82241055 | 10.9525245  | 10.61869828 | 10.53202983 | 10.91531467 | 10.87534003 |
| "Tmed3"    | 8.205428    | 7.201037    | 9.066351    | 8.329934    | 8.159894    | 7.966735    | 9.080727    | 8.359642    |
| "Tmed4"    | 6.1247933   | 6.24366475  | 6.2501171   | 6.1919757   | 6.14689     | 6.03103755  | 6.2650025   | 6.1990792   |
| "Tmed5"    | 9.1563335   | 9.059355    | 8.857147    | 9.100267    | 9.665837    | 9.5395765   | 9.0622885   | 9.2766515   |
| "Tmed7"    | 6.52304155  | 6.503906575 | 6.4555356   | 6.52695215  | 6.5260275   | 6.451545175 | 6.217789325 | 6.678473675 |
| "Tmed9"    | 8.603591    | 8.4664542   | 8.663812    | 8.716001    | 8.47657     | 8.54730465  | 8.4252575   | 8.64210725  |
| "Tmeff1"   | 2.9539413   | 3.37323     | 3.1521695   | 3.265645    | 3.9456556   | 3.0326123   | 3.1858706   | 3.2384286   |
| "Tmeff2"   | 4.294176    | 4.247898    | 5.0380936   | 4.02683     | 5.9469132   | 5.3059263   | 5.0444927   | 4.230384    |
| "Tmem100"  | 6.5434375   | 7.231709    | 6.743997    | 7.7497706   | 6.5402713   | 6.5086327   | 6.8725576   | 7.051267    |
| "Tmem101"  | 4.8003254   | 4.8745604   | 5.5996      | 5.958534    | 5.0976586   | 4.8509173   | 5.555362    | 6.215411    |
| "Tmem106a" | 2.307198    | 2.334278    | 2.3298244   | 2.3780494   | 2.4612827   | 2.9741435   | 2.970396    | 2.3820076   |
| "Tmem106b" | 8.336633    | 8.072063    | 6.1114287   | 6.7887373   | 7.979413    | 7.858535    | 6.327132    | 6.793605    |

|            |             |             |             |             |             |             |             |             |
|------------|-------------|-------------|-------------|-------------|-------------|-------------|-------------|-------------|
| "Tmem106c" | 2.83102025  | 2.93545935  | 2.93283845  | 3.0598205   | 2.9329359   | 2.844653    | 2.9314724   | 3.02440095  |
| "Tmem109"  | 8.672677    | 8.9584451   | 10.0508364  | 10.15445105 | 9.01861965  | 8.4581564   | 9.23898825  | 9.9931955   |
| "Tmem11"   | 9.432602    | 9.962703    | 9.32209     | 9.521408    | 9.535799    | 9.660418    | 9.205547    | 9.294581    |
| "Tmem110"  | 2.7170553   | 3.639483    | 3.3715854   | 3.431779    | 3.4096808   | 3.3587854   | 3.3553286   | 3.4338174   |
| "Tmem111"  | 10.439755   | 10.662767   | 10.542475   | 10.5852375  | 10.76043    | 10.816119   | 10.366051   | 10.525072   |
| "Tmem115"  | 7.0777187   | 7.593482    | 6.7300534   | 6.8172383   | 7.1133842   | 7.3156824   | 6.609431    | 6.668601    |
| "Tmem116"  | 2.4509585   | 2.4700308   | 2.4390316   | 2.4915853   | 2.4378526   | 2.3792458   | 2.4435256   | 2.491344    |
| "Tmem120b" | 3.8489246   | 3.9927883   | 3.9219666   | 4.04119     | 4.2005267   | 3.9710948   | 5.4678125   | 4.0637717   |
| "Tmem123"  | 7.3481008   | 6.802704    | 7.95440275  | 8.551806    | 7.68118725  | 8.0273717   | 7.91186335  | 8.240342    |
| "Tmem126a" | 11.594568   | 11.816222   | 12.245706   | 12.313497   | 11.792671   | 11.397147   | 12.005822   | 12.243447   |
| "Tmem128"  | 6.976615    | 7.4144664   | 6.88565     | 6.991308    | 7.708164    | 7.72176     | 7.364529    | 6.933356    |
| "Tmem129"  | 5.639806    | 5.5793815   | 5.647027    | 5.3866363   | 6.3153157   | 6.4373918   | 5.4816227   | 5.731046    |
| "Tmem131"  | 8.865088    | 8.574352    | 9.03052     | 8.805218    | 8.997506    | 9.208516    | 9.009497    | 8.998765    |
| "Tmem132a" | 2.4072146   | 2.367581    | 2.8361278   | 2.4269922   | 2.4030397   | 2.2838554   | 2.6354642   | 2.415578    |
| "Tmem134"  | 7.114394    | 7.1771038   | 7.39014365  | 7.3439242   | 7.20446465  | 7.1722867   | 7.31481     | 6.90166025  |
| "Tmem135"  | 4.4004625   | 4.48398675  | 5.16027635  | 5.459146    | 5.0399766   | 4.8639655   | 5.122303    | 5.2372575   |
| "Tmem140"  | 11.604283   | 12.149116   | 8.604618    | 8.621496    | 10.893435   | 12.090087   | 8.553862    | 9.989149    |
| "Tmem141"  | 6.6029856   | 6.3999945   | 7.0742365   | 6.6062897   | 6.36827945  | 6.0812776   | 7.00655775  | 6.59437025  |
| "Tmem143"  | 4.3093615   | 4.7684584   | 5.3804746   | 5.992989    | 4.8155403   | 4.378444    | 4.618096    | 5.476737    |
| "Tmem144"  | 3.312778    | 4.362712    | 3.162753    | 3.244158    | 3.5392556   | 3.073097    | 2.6646376   | 3.3715558   |
| "Tmem147"  | 11.277769   | 11.551901   | 11.763469   | 11.797697   | 11.327322   | 10.973816   | 11.68854    | 11.549684   |
| "Tmem149"  | 3.1436732   | 3.9414513   | 3.5471396   | 3.5978444   | 3.982338    | 3.4386075   | 3.4527276   | 3.5893903   |
| "Tmem14c"  | 9.473173    | 8.862321    | 9.159523    | 9.3126      | 9.129307    | 9.112637    | 9.0581455   | 9.23914     |
| "Tmem150a" | 6.120416    | 5.314108    | 6.7832127   | 6.915496    | 5.680692    | 5.500391    | 6.3621354   | 6.895507    |
| "Tmem151b" | 3.321774    | 3.507549    | 3.3186553   | 3.3566163   | 3.3213966   | 3.2962174   | 3.3127293   | 3.411842    |
| "Tmem158"  | 4.633088    | 3.477687    | 5.715457    | 3.885752    | 4.4270763   | 4.5073466   | 6.122803    | 4.574488    |
| "Tmem159"  | 5.9572463   | 5.6872754   | 5.488615    | 6.1943736   | 6.94341     | 6.191937    | 6.015661    | 6.4861927   |
| "Tmem160"  | 8.189724    | 8.378213    | 9.039156    | 9.040527    | 8.28113     | 8.0704565   | 8.79708     | 8.801577    |
| "Tmem161a" | 6.987122    | 7.47504765  | 7.19085     | 7.52629335  | 7.22919675  | 7.0892172   | 7.04231225  | 7.541283    |
| "Tmem163"  | 2.5667276   | 2.668365    | 2.5762463   | 2.6989295   | 2.5828934   | 2.6173725   | 2.5748682   | 2.690426    |
| "Tmem165"  | 7.8869743   | 7.9957347   | 8.650715    | 8.474496    | 8.442899    | 8.6113615   | 8.651729    | 8.431552    |
| "Tmem167"  | 6.776456375 | 7.381954    | 7.399028925 | 7.41396075  | 7.077501    | 7.669574125 | 7.319300925 | 7.301367575 |
| "Tmem168"  | 5.5739632   | 6.030008133 | 6.331735433 | 6.275309433 | 6.011494467 | 5.851952533 | 6.052112    | 6.3264409   |
| "Tmem173"  | 3.6065588   | 3.9792497   | 4.007148    | 4.0622334   | 3.7598155   | 4.0459423   | 4.477241    | 4.0585685   |
| "Tmem175"  | 2.6009786   | 2.8191576   | 2.6100082   | 2.5613863   | 2.771718    | 2.2812002   | 2.4244401   | 2.6609163   |
| "Tmem176a" | 9.410251    | 5.391689    | 6.5325184   | 5.5475514   | 6.6438698   | 7.14553905  | 7.475254    | 5.8694404   |
| "Tmem176b" | 10.820897   | 7.8477674   | 8.712751    | 7.589942    | 9.012281    | 9.2865      | 9.643612    | 7.9633656   |
| "Tmem179b" | 4.250869833 | 4.4565532   | 3.977867833 | 3.9308264   | 4.404067267 | 4.530106067 | 4.2481746   | 4.1184658   |
| "Tmem183a" | 5.239360767 | 5.023533867 | 4.5640284   | 4.5521057   | 4.4736495   | 4.9257112   | 4.553347033 | 4.609958933 |
| "Tmem184b" | 4.3517857   | 4.332341    | 4.7092476   | 4.6079435   | 4.562312    | 4.547845    | 5.0067534   | 4.6583853   |
| "Tmem184c" | 7.4214306   | 7.2850504   | 7.755097    | 7.74968     | 7.4676385   | 7.3398905   | 7.480508    | 7.833516    |
| "Tmem185b" | 6.037938    | 6.767928    | 6.6759243   | 6.6324086   | 6.5189424   | 6.728707    | 6.2279177   | 6.4374285   |
| "Tmem186"  | 4.0438645   | 5.0258961   | 4.1398462   | 4.463778633 | 4.582573067 | 4.561594867 | 3.969122267 | 4.4870485   |
| "Tmem188"  | 9.634639    | 9.9670555   | 10.5938555  | 10.8401695  | 10.188951   | 9.8517535   | 10.5108075  | 10.8722025  |
| "Tmem189"  | 5.12928825  | 5.9770715   | 4.8282542   | 4.73983315  | 5.1512072   | 5.725666    | 5.08074265  | 4.6987178   |
| "Tmem19"   | 5.422421133 | 4.2970362   | 4.441669167 | 4.452044433 | 4.488698067 | 4.303436333 | 4.368360367 | 4.672279    |
| "Tmem191c" | 2.4322779   | 2.644981    | 2.48072945  | 2.7398671   | 2.49901805  | 2.44492625  | 2.48286375  | 2.5512302   |
| "Tmem192"  | 6.940348    | 7.136665    | 7.0198817   | 7.42625     | 6.815347    | 7.084233    | 7.370796    | 6.946556    |
| "Tmem199"  | 7.00216     | 8.117086    | 7.2954      | 7.9703245   | 7.356124    | 7.212929    | 7.710765    | 7.5189424   |
| "Tmem2"    | 6.06182165  | 5.5426545   | 6.67470035  | 7.05803025  | 5.727409    | 5.97884515  | 6.55825985  | 6.661826    |
| "Tmem203"  | 5.263086    | 5.625021    | 5.417379    | 5.469316    | 5.630883    | 5.4149733   | 5.953142    | 4.7200904   |
| "Tmem205"  | 9.817463    | 7.0284977   | 7.4988093   | 6.644757    | 7.8572187   | 7.641257    | 8.616432    | 7.2484617   |
| "Tmem206"  | 3.4685566   | 3.775063825 | 3.8625699   | 4.1141774   | 3.7392861   | 3.6172149   | 4.078989525 | 4.134040575 |
| "Tmem208"  | 8.31918     | 8.21394     | 8.596338    | 8.625657    | 8.421499    | 8.135361    | 8.853173    | 8.564672    |
| "Tmem209"  | 4.4840329   | 4.96546585  | 4.6743692   | 4.5238569   | 4.7871455   | 4.6816546   | 4.5769526   | 4.79301265  |
| "Tmem214"  | 6.46042025  | 6.9527865   | 6.6928267   | 6.677349    | 6.7914158   | 6.95262175  | 6.5489483   | 6.5450597   |
| "Tmem216"  | 4.6767931   | 4.9888985   | 4.75212325  | 4.5161341   | 5.33608235  | 4.96663855  | 4.766386    | 4.21916525  |
| "Tmem218"  | 4.950017    | 4.965435    | 5.719601    | 5.532202    | 4.8562894   | 4.6215696   | 5.3802776   | 5.3857417   |
| "Tmem219"  | 6.957892    | 6.6691265   | 7.1808033   | 7.02737     | 6.806972    | 6.6215396   | 7.191632    | 6.855497    |
| "Tmem222"  | 7.117835    | 7.8624663   | 7.384963    | 7.3553267   | 7.3000817   | 7.4888268   | 7.367959    | 7.4121885   |
| "Tmem223"  | 9.624898    | 10.065489   | 10.340369   | 10.273738   | 9.935484    | 9.473036    | 10.413042   | 9.784649    |
| "Tmem229b" | 2.8820198   | 3.0480669   | 2.7347522   | 2.874149    | 2.937655    | 3.3938015   | 2.7443361   | 2.6737506   |
| "Tmem234"  | 9.402799    | 9.373988    | 8.982978    | 8.986761    | 9.2157955   | 9.3750305   | 8.832096    | 8.893024    |
| "Tmem242"  | 9.35836     | 9.816427    | 10.026631   | 10.276626   | 9.6367855   | 9.383535    | 9.382406    | 10.208668   |
| "Tmem245"  | 6.123911    | 5.763289    | 6.241994    | 6.218209    | 6.989873    | 6.341931    | 6.8083115   | 6.44672     |
| "Tmem246"  | 7.058402    | 6.809307    | 7.9843698   | 8.202126    | 7.54136     | 5.557419    | 8.175719    | 7.8482103   |
| "Tmem27"   | 2.8390465   | 2.9980087   | 2.892084    | 3.0317008   | 2.9133494   | 2.8548656   | 2.890463    | 2.999548    |
| "Tmem30a"  | 8.483091425 | 8.53851175  | 9.00902925  | 9.145157025 | 8.4781957   | 8.559288125 | 8.836274175 | 9.23089775  |
| "Tmem30b"  | 5.8704405   | 3.0225403   | 3.39965     | 3.1267955   | 2.945325    | 2.9847097   | 3.0077052   | 3.1857924   |
| "Tmem33"   | 5.142317175 | 4.8470839   | 4.75116255  | 4.8576069   | 4.97097935  | 5.124275    | 4.94013925  | 4.9653817   |
| "Tmem35"   | 2.587271    | 2.724059    | 2.642888    | 2.7362182   | 2.6570501   | 2.6001863   | 2.640808    | 2.7114956   |
| "Tmem37"   | 8.125055    | 8.717861    | 5.79895     | 6.3128586   | 8.5852995   | 8.798541    | 6.7180924   | 6.173768    |
| "Tmem38a"  | 9.62560875  | 10.182103   | 10.0748065  | 10.247477   | 9.6981621   | 9.48238675  | 9.9793295   | 10.08518425 |
| "Tmem38b"  | 6.549179533 | 6.4932034   | 6.173281733 | 6.206590667 | 6.381414533 | 6.3401986   | 6.809177233 | 6.2076404   |
| "Tmem39a"  | 5.314396    | 6.5706224   | 5.5648823   | 5.3063226   | 5.3889904   | 6.857856    | 5.3181076   | 5.215042    |
| "Tmem40"   | 2.520555    | 2.590907    | 2.5591972   | 2.645719    | 2.5517914   | 2.5192015   | 2.5289905   | 2.6371875   |
| "Tmem41a"  | 5.5395036   | 5.397431    | 5.9213085   | 5.6241703   | 5.5561266   | 5.0931506   | 5.871575    | 5.6249204   |
| "Tmem41b"  | 6.29540868  | 6.56925544  | 6.91073802  | 6.69621418  | 6.63253786  | 6.37780304  | 6.50058528  | 6.73824874  |
| "Tmem42"   | 7.1876264   | 7.4987097   | 8.049942    | 7.7418513   | 7.288713    | 7.03438     | 6.9810896   | 7.8212414   |
| "Tmem43"   | 6.662418    | 6.6689863   | 6.382518    | 6.170154    | 7.2981534   | 7.285685    | 6.6330256   | 6.323236    |
| "Tmem45a"  | 2.5676126   | 2.267047    | 5.601501    | 2.6699076   | 2.4883552   | 2.212132    | 2.433984    | 2.5529938   |

|             |             |             |             |             |             |             |             |             |
|-------------|-------------|-------------|-------------|-------------|-------------|-------------|-------------|-------------|
| "Tmem45b"   | 2.6277733   | 3.919443    | 7.478812    | 4.219723    | 7.796386    | 7.1414337   | 8.324001    | 5.6685476   |
| "Tmem47"    | 5.00607185  | 4.6493203   | 5.1699901   | 5.33123745  | 4.9454216   | 4.569908    | 5.20031095  | 5.5173785   |
| "Tmem48"    | 3.0546451   | 2.80101275  | 2.86769525  | 2.59301635  | 2.74534045  | 2.67767805  | 3.05733845  | 2.84673375  |
| "Tmem5"     | 8.678169    | 9.27923     | 9.444963    | 9.871921    | 9.044039    | 8.74259     | 9.564806    | 9.583861    |
| "Tmem50b"   | 6.782564    | 7.070971    | 7.324279    | 7.474629    | 7.5005364   | 7.2385063   | 7.7725534   | 7.5283446   |
| "Tmem51"    | 3.7374372   | 2.4878035   | 2.863846    | 2.5238376   | 2.7640505   | 3.3919141   | 2.481857    | 2.541356    |
| "Tmem53"    | 4.516997    | 2.4169302   | 2.8402467   | 2.7143545   | 3.7836096   | 2.6960354   | 4.69498     | 2.9309373   |
| "Tmem55a"   | 8.21516     | 8.712532    | 9.147659    | 9.577031    | 8.624655    | 8.538802    | 8.940187    | 9.482468    |
| "Tmem56"    | 9.042985    | 8.409504    | 9.4337225   | 9.328911    | 8.263631    | 8.080548    | 9.211808    | 9.834346    |
| "Tmem60"    | 9.03591     | 9.178481    | 9.412212    | 9.491616    | 9.189959    | 8.686797    | 9.400429    | 9.295973    |
| "Tmem62"    | 6.148458    | 5.310677    | 4.33487     | 4.0370407   | 5.3945036   | 6.0151825   | 5.043654    | 4.1968937   |
| "Tmem63a"   | 5.7372117   | 6.593998    | 6.6456175   | 6.1564903   | 5.959334    | 6.0968113   | 6.2370114   | 6.0649157   |
| "Tmem63b"   | 6.001506    | 5.9840093   | 6.01075     | 6.218408    | 6.010102    | 5.7274      | 6.2723584   | 6.0271583   |
| "Tmem66"    | 11.732831   | 12.031902   | 11.869629   | 11.57382    | 11.916527   | 12.063387   | 11.781789   | 11.643518   |
| "Tmem68"    | 6.2567797   | 6.3983793   | 5.9686565   | 6.1497283   | 6.289766    | 6.6917815   | 6.306677    | 6.266136    |
| "Tmem70"    | 10.491088   | 10.418118   | 11.403641   | 11.433631   | 11.125327   | 10.35895    | 11.339331   | 11.299558   |
| "Tmem71"    | 7.1602535   | 7.6825056   | 6.1187053   | 5.173152    | 6.602707    | 7.345374    | 5.9250274   | 6.2177672   |
| "Tmem79"    | 2.3076253   | 2.5912023   | 2.333654    | 2.5284064   | 2.3338413   | 2.3059947   | 2.3318686   | 2.4094448   |
| "Tmem80"    | 6.2434373   | 6.6824203   | 7.074994    | 6.889052    | 6.534404    | 6.401678    | 6.9042883   | 7.033339    |
| "Tmem85"    | 8.59785175  | 9.005004    | 9.06245025  | 9.1806605   | 8.952028    | 8.5747955   | 8.913053    | 9.08041035  |
| "Tmem87a"   | 4.6710696   | 5.654091    | 5.226581    | 5.14917     | 4.6705656   | 6.2681403   | 4.810188    | 4.8550014   |
| "Tmem8c"    | 2.6371975   | 2.2425692   | 2.2202754   | 2.2918015   | 2.2414773   | 2.199226    | 2.8678737   | 2.2878613   |
| "Tmem9"     | 3.0051653   | 2.8715284   | 3.0564742   | 3.0435925   | 3.1266546   | 2.842074    | 3.1429186   | 3.0537703   |
| "Tmem93"    | 9.646156    | 9.740427    | 9.83775     | 9.9165005   | 9.6475725   | 9.63337     | 10.1472115  | 9.879809    |
| "Tmem97"    | 6.453506    | 3.297173    | 3.3566666   | 2.9835873   | 3.2277377   | 3.213911    | 3.1782613   | 3.2633615   |
| "Tmem9b"    | 7.8349745   | 7.7882795   | 8.23662365  | 8.380329    | 7.83456075  | 7.69133035  | 8.2798355   | 8.28258725  |
| "Tmigd1"    | 2.581275    | 2.822503    | 2.86962     | 2.881299    | 2.7481961   | 3.2654243   | 2.7823782   | 2.7182121   |
| "Tmlhe"     | 3.416307033 | 3.2345639   | 3.541188    | 3.6818313   | 3.8053805   | 3.293969633 | 3.684851    | 3.991392567 |
| "Tmod1"     | 10.637353   | 11.344646   | 11.437429   | 11.609725   | 11.159344   | 11.106298   | 10.738671   | 11.436279   |
| "Tmod2"     | 2.724872967 | 2.907682033 | 2.853705033 | 2.942857133 | 2.944127633 | 2.814747033 | 2.8764435   | 2.9217924   |
| "Tmod3"     | 6.027804033 | 5.6586873   | 6.0063647   | 6.117181867 | 6.0902707   | 6.407475767 | 6.2393835   | 6.512119133 |
| "Tmod4"     | 12.891054   | 13.171572   | 13.615425   | 13.686637   | 12.946992   | 12.665894   | 13.49915    | 13.490352   |
| "Tmpo"      | 5.27769215  | 5.559463675 | 5.279663775 | 5.4612106   | 5.409887875 | 5.35701705  | 5.212940225 | 5.465687375 |
| "Tmpps"     | 2.7492468   | 2.9593809   | 3.0742314   | 2.9626503   | 2.8907125   | 2.8748953   | 2.8549473   | 2.9431722   |
| "Tmprss1d"  | 2.8770716   | 3.1473894   | 2.9546928   | 3.141918    | 2.9678876   | 2.8751733   | 2.9537683   | 3.0948842   |
| "Tmprss2"   | 3.15619705  | 2.650252    | 2.5691476   | 2.68100855  | 2.5984287   | 2.55806625  | 2.5999944   | 2.67688515  |
| "Tmprss5"   | 2.8997946   | 2.8357737   | 2.8287704   | 2.8814452   | 2.825347    | 2.742889    | 2.8082361   | 2.8781323   |
| "Tmsb10"    | 6.73428478  | 4.85661702  | 6.48483214  | 5.85776064  | 5.93420886  | 6.62870512  | 7.05789672  | 6.05415918  |
| "Tmsb4x"    | 12.906573   | 12.232187   | 13.209549   | 12.798393   | 12.899727   | 13.471518   | 13.184198   | 12.873985   |
| "Tmtc4"     | 4.779189    | 5.14077     | 6.6597342   | 6.9586744   | 5.6582813   | 6.4071016   | 5.882392    | 6.3654943   |
| "Tmub1"     | 2.8786016   | 2.8795338   | 2.866175    | 2.9097025   | 2.8449266   | 2.864812    | 2.930639    | 3.421707    |
| "Tmub2"     | 7.9463577   | 8.055808    | 7.917146    | 7.7057757   | 8.118469    | 7.871341    | 7.837647    | 7.975937    |
| "Tmx1"      | 8.02781765  | 7.8061635   | 8.28366085  | 8.00429625  | 8.09068785  | 8.26604465  | 8.22354965  | 8.2634795   |
| "Tmx2"      | 7.48581065  | 7.41042165  | 8.557273    | 8.6248825   | 7.9405625   | 7.1135161   | 8.882929    | 8.6959255   |
| "Tnc"       | 3.2624035   | 3.448298    | 7.123963    | 5.278062    | 2.9506936   | 3.4689307   | 3.4172988   | 5.428349    |
| "Tnf"       | 2.3199713   | 2.3870683   | 2.3487937   | 2.4431126   | 2.3494265   | 2.3161545   | 2.3478909   | 2.541013    |
| "Tnfaip1"   | 8.345068433 | 8.755162    | 8.80486     | 9.0618035   | 8.2803741   | 8.1347735   | 8.883366333 | 8.747231667 |
| "Tnfaip2"   | 5.76474025  | 3.7677302   | 6.7183389   | 6.146988    | 5.13782675  | 4.44008735  | 7.3534225   | 6.0560868   |
| "Tnfaip6"   | 3.4092233   | 3.644484    | 4.315664    | 3.8067834   | 3.5614738   | 3.46667     | 3.5605626   | 3.7029822   |
| "Tnfaip8"   | 5.6480894   | 6.3626328   | 6.3002086   | 5.7439632   | 6.042513    | 7.499903    | 6.3676176   | 6.0088034   |
| "Tnfaip81"  | 2.4608088   | 2.4676387   | 2.4681084   | 2.5111096   | 2.534648    | 2.4519303   | 2.462044    | 2.3535297   |
| "Tnfrsf10b" | 2.3300314   | 2.4007251   | 2.3755648   | 2.4299219   | 2.3782394   | 2.34396     | 2.371368    | 2.431998    |
| "Tnfrsf11a" | 2.550926    | 2.67775215  | 2.77186885  | 2.74456395  | 2.6421863   | 2.55435965  | 2.6330572   | 2.71798     |
| "Tnfrsf11b" | 2.81995665  | 3.00232145  | 2.92781075  | 3.0752126   | 2.93523255  | 2.86684525  | 2.9213972   | 3.03548905  |
| "Tnfrsf12a" | 9.893975    | 9.255241    | 8.1322505   | 7.9764365   | 8.324868    | 8.7539405   | 8.04644035  | 7.5301677   |
| "Tnfrsf13b" | 2.124629    | 2.1546185   | 2.1420107   | 2.204971    | 2.1426976   | 5.2444086   | 2.141662    | 2.2063627   |
| "Tnfrsf13c" | 2.8868556   | 3.191886    | 2.9754763   | 3.1721475   | 2.9974072   | 6.0082874   | 2.9639006   | 3.055252    |
| "Tnfrsf18"  | 2.0563364   | 2.0743306   | 2.079101    | 2.1178198   | 2.148316    | 2.8851798   | 2.082142    | 2.1158078   |
| "Tnfrsf19"  | 4.039105367 | 4.3690734   | 3.998214867 | 3.839583333 | 4.773669833 | 4.338615133 | 3.6256879   | 4.171276267 |
| "Tnfrsf1a"  | 7.327412    | 6.791817    | 7.0244937   | 6.33221     | 7.4387183   | 7.3408127   | 7.459915    | 6.48856     |
| "Tnfrsf1b"  | 4.754086    | 3.3632449   | 3.2211705   | 3.7560859   | 3.83612225  | 3.899671    | 3.9294258   | 3.63799285  |
| "Tnfrsf21"  | 5.718896    | 7.1664686   | 5.9399057   | 6.3147932   | 5.5114048   | 7.1022197   | 5.6853564   | 6.0466299   |
| "Tnfrsf22"  | 2.4639698   | 2.495178    | 2.4638178   | 2.5541236   | 2.47865105  | 2.4461303   | 2.50507465  | 2.51800645  |
| "Tnfrsf25"  | 2.042921    | 2.0764277   | 2.0578728   | 2.1288307   | 2.0574381   | 2.8917992   | 2.0578954   | 2.1224458   |
| "Tnfrsf9"   | 2.3491712   | 2.41818345  | 2.40222585  | 2.4675391   | 2.3838314   | 2.355775    | 2.3854859   | 2.4684181   |
| "Tnfsf11"   | 2.492211    | 2.73117925  | 2.5533644   | 2.6490305   | 2.5594644   | 2.5783805   | 2.5578395   | 2.6336203   |
| "Tnfsf13b"  | 2.7489564   | 2.9360268   | 2.8304858   | 3.0069993   | 2.9120357   | 3.3812659   | 3.240929    | 2.8103669   |
| "Tnfsf4"    | 2.431359    | 2.528865    | 2.4612386   | 2.5955887   | 2.4679897   | 2.408547    | 2.460237    | 2.519397    |
| "Tnip1"     | 7.7128873   | 8.335372    | 7.560091    | 7.556588    | 7.5767365   | 7.848912    | 7.653551    | 7.368258    |
| "Tnip2"     | 3.6502821   | 3.6479104   | 3.5995007   | 3.5795999   | 4.1737766   | 3.5605927   | 4.0285525   | 3.631149    |
| "Tnk2"      | 4.8250172   | 5.2252414   | 5.8660842   | 6.09661     | 4.7602489   | 4.66837585  | 5.74995485  | 5.7609796   |
| "Tnks1bp1"  | 3.1468487   | 3.4313104   | 3.4512904   | 3.4804316   | 3.6178153   | 3.4629476   | 3.4504044   | 3.4786167   |
| "Tnks2"     | 10.31941    | 10.40521    | 10.68928    | 10.688013   | 10.595001   | 10.4608345  | 10.587147   | 10.600694   |
| "Tnmd"      | 7.2663307   | 6.9459443   | 11.500973   | 9.852533    | 7.28369     | 6.679426    | 6.65562     | 10.311882   |
| "Tnnc1"     | 11.091327   | 6.7446876   | 9.24672     | 10.212002   | 11.781479   | 8.252037    | 10.665646   | 10.8471575  |
| "Tnnc2"     | 15.644113   | 15.780888   | 15.783593   | 15.608937   | 15.700104   | 15.700104   | 15.630953   | 15.635861   |
| "Tnni1"     | 10.728471   | 5.823386    | 8.677002    | 9.946789    | 11.713502   | 7.5123825   | 10.494539   | 10.875873   |
| "Tnni2"     | 11.611323   | 12.06446217 | 12.0364328  | 12.26354467 | 12.01204833 | 11.85691167 | 11.8639331  | 12.21600183 |
| "Tnnt1"     | 12.589068   | 8.974812    | 11.079831   | 11.884982   | 12.979444   | 9.9825535   | 12.13431    | 12.273129   |
| "Tnnt2"     | 9.3477525   | 4.87428725  | 4.86459715  | 5.7396736   | 6.49688275  | 4.8334833   | 9.10765     | 6.40016015  |
| "Tnnt3"     | 15.41318    | 15.700393   | 15.701059   | 15.64372    | 15.55466    | 15.556699   | 15.540379   | 15.607636   |

|            |             |             |             |             |             |             |             |             |
|------------|-------------|-------------|-------------|-------------|-------------|-------------|-------------|-------------|
| "Tnp1"     | 3.2718409   | 3.56040385  | 3.3852061   | 3.59579525  | 3.39909425  | 3.3028707   | 3.37914025  | 3.5087764   |
| "Tnp2"     | 2.5822566   | 2.695087    | 2.6378279   | 2.72022     | 2.641566    | 2.5820527   | 2.635016    | 2.717529    |
| "Tnp01"    | 5.9799924   | 6.0607853   | 5.9062542   | 6.016783    | 6.1868005   | 6.14334835  | 5.84139985  | 6.07046815  |
| "Tnp02"    | 2.295017    | 2.3780243   | 2.4397023   | 2.4643762   | 2.358084    | 2.5993154   | 2.3548658   | 2.4529815   |
| "Tnp03"    | 7.6621309   | 7.854664333 | 7.960148833 | 7.983171433 | 7.706056233 | 7.825835233 | 8.029683267 | 8.020608933 |
| "Tnrc18"   | 2.588026    | 2.6803887   | 2.6585925   | 2.663033    | 2.6583488   | 2.6450367   | 2.6466663   | 2.7078226   |
| "Tnrc6a"   | 7.541885714 | 8.080460843 | 7.624811286 | 7.596286557 | 7.8353799   | 7.970651857 | 7.851376243 | 7.6944704   |
| "Tnrc6b"   | 8.251423    | 8.676611    | 8.313131    | 8.340002    | 8.401688    | 8.424826    | 8.284606    | 8.225937    |
| "Tnrc6c"   | 7.2583871   | 7.82185015  | 7.4893356   | 7.3361105   | 7.5556123   | 7.90943765  | 7.4598283   | 7.5608935   |
| "Tns1"     | 8.08241615  | 8.9902715   | 7.670866    | 8.13176225  | 8.6429223   | 8.4577995   | 8.1064537   | 8.11824185  |
| "Tnxb"     | 7.5017533   | 6.428801    | 6.598165    | 8.005044    | 8.72036     | 8.346697    | 7.974102    | 8.079528    |
| "Tob1"     | 11.15834    | 10.385236   | 12.025913   | 12.460728   | 10.724378   | 9.53648     | 11.964973   | 12.279396   |
| "Tob2"     | 8.60987625  | 8.706645775 | 8.384735775 | 8.46671925  | 9.267413    | 8.450099125 | 8.96724775  | 8.63628725  |
| "Toe1"     | 3.2280306   | 3.9433676   | 3.4317626   | 3.6044893   | 3.69773525  | 3.7723452   | 3.27633675  | 3.5264814   |
| "Tollip"   | 5.45643815  | 6.0758704   | 5.0869177   | 5.1381817   | 5.4695539   | 6.5224393   | 5.1045579   | 5.05213185  |
| "Tom1"     | 8.58071865  | 8.71049385  | 8.33452325  | 8.485416    | 8.4676257   | 8.318384    | 8.299848    | 8.1911215   |
| "Tom1l1"   | 4.766148    | 5.2701745   | 4.236511    | 5.0299826   | 4.4143224   | 3.8491395   | 4.822718    | 5.012834    |
| "Tom1l2"   | 4.21919625  | 4.95398195  | 3.8987899   | 4.35116485  | 4.3428165   | 4.14124535  | 3.9898131   | 4.31109975  |
| "Tomm20"   | 9.98848864  | 10.09911206 | 10.0263212  | 10.52408434 | 10.1394241  | 10.2176802  | 10.36953054 | 10.3193836  |
| "Tomm22"   | 8.232223    | 8.60347665  | 8.65161835  | 8.7600275   | 8.50024375  | 8.28306515  | 8.59448175  | 8.6461352   |
| "Tomm34"   | 7.1232743   | 7.0559306   | 7.0108914   | 6.9637756   | 7.072346    | 7.372285    | 7.034431    | 6.941249    |
| "Tomm40"   | 7.245955    | 7.1508107   | 7.030267    | 7.1971807   | 7.146199    | 6.797701    | 7.1290812   | 7.198893    |
| "Tomm40l"  | 7.2292137   | 6.9977884   | 8.046354    | 8.194677    | 7.8137155   | 7.026924    | 7.5758495   | 7.9611917   |
| "Tomm70a"  | 7.570736575 | 7.8724694   | 8.251884875 | 8.768399125 | 7.952156425 | 8.1716231   | 8.152226175 | 8.6788405   |
| "Top1"     | 9.503825    | 9.855447    | 9.040002    | 9.086337    | 9.21765     | 9.84594     | 9.163535    | 9.216388    |
| "Top1mt"   | 5.5386186   | 5.5481553   | 5.832784    | 6.3197823   | 5.3505387   | 5.63207     | 6.17636     | 5.6885858   |
| "Top2a"    | 2.152504    | 2.0937774   | 3.3677673   | 2.1377013   | 2.141587    | 4.503698    | 2.3635547   | 2.1133826   |
| "Top2b"    | 5.598459367 | 6.0810129   | 5.7183208   | 5.672784433 | 5.938291567 | 5.942677067 | 5.5542868   | 5.918269333 |
| "Top3a"    | 2.5917263   | 2.6896436   | 2.6129403   | 2.5887961   | 2.7494862   | 2.5840187   | 2.6139872   | 2.5891528   |
| "Top3b"    | 4.7878972   | 5.2336784   | 4.674584867 | 4.724095133 | 4.941348067 | 5.0876706   | 4.783395667 | 4.682693267 |
| "Topbp1"   | 6.7763443   | 7.2566133   | 7.4900613   | 7.909145    | 7.695598    | 7.595287    | 7.2405014   | 7.6727543   |
| "Topors"   | 6.491714133 | 6.431787867 | 6.403336833 | 6.387384667 | 6.3498323   | 6.329194233 | 6.2139302   | 6.290331333 |
| "Tor1a"    | 6.993577    | 6.5874333   | 6.1892433   | 5.8108673   | 6.444105    | 6.5871234   | 6.3429604   | 5.98145     |
| "Tor1aip1" | 9.18047     | 9.730568    | 8.6762295   | 8.551226    | 8.965881    | 9.195569    | 8.595372    | 8.785164    |
| "Tor1aip2" | 7.8744109   | 7.762446775 | 8.306388825 | 8.3425635   | 8.15224975  | 7.994275    | 8.58657175  | 8.3138975   |
| "Tor1b"    | 6.616827533 | 6.980472867 | 6.773023767 | 6.6461509   | 6.596267233 | 6.645617    | 6.864464667 | 6.644911433 |
| "Tor2a"    | 5.9252055   | 5.5238781   | 5.78164075  | 5.6763792   | 5.6469262   | 5.9828803   | 5.76231675  | 5.78398775  |
| "Tor3a"    | 4.2916803   | 5.1377764   | 3.6939507   | 3.8507156   | 4.584532    | 5.347234    | 4.012597    | 3.6519656   |
| "Tox"      | 3.2184587   | 3.379209    | 3.2326427   | 3.3140533   | 3.2574608   | 3.2347515   | 3.189888    | 3.3455894   |
| "Tox4"     | 6.9204166   | 7.6776865   | 7.46764185  | 7.71908065  | 7.28459715  | 7.6069165   | 7.259964    | 7.51752515  |
| "Tpbg"     | 2.629501267 | 2.804967967 | 2.824148967 | 2.8943294   | 2.742413833 | 2.703436833 | 2.728601367 | 2.8512011   |
| "Tpbpa"    | 2.776225767 | 2.880376267 | 2.795621967 | 2.906157167 | 2.802599233 | 2.722805367 | 2.794323267 | 2.8834597   |
| "Tpbpb"    | 3.94282045  | 4.3905566   | 4.2252863   | 4.2964239   | 4.18509745  | 4.1008024   | 4.14370475  | 4.2204448   |
| "Tpcn1"    | 5.179979    | 5.487661    | 5.7320046   | 5.8844256   | 5.6860557   | 5.236528    | 5.6590524   | 5.7606444   |
| "Tpcn2"    | 2.3972714   | 2.3538103   | 2.4347076   | 2.4103534   | 2.3872876   | 2.384299    | 2.7166      | 2.4155846   |
| "Tpd52"    | 8.00799635  | 7.86041485  | 8.22537075  | 8.0518285   | 7.7955315   | 7.62089415  | 8.724826    | 7.984734    |
| "Tpd52l1"  | 8.4003315   | 8.145576    | 9.198604    | 8.874467    | 8.807368    | 7.9232826   | 9.30611     | 9.251851    |
| "Tpd52l2"  | 7.265215533 | 7.376753    | 7.4131391   | 7.176936333 | 7.320207867 | 7.462974    | 7.5919555   | 7.239048    |
| "Tpi1"     | 13.40847067 | 13.8520935  | 14.05509333 | 14.178878   | 13.7296705  | 13.45649067 | 13.62386117 | 13.918507   |
| "Tpk1"     | 2.3801465   | 2.3888764   | 2.3897233   | 2.4374084   | 2.39046     | 2.3013787   | 2.385817    | 2.4388611   |
| "Tpm1"     | 9.4577626   | 8.7124178   | 10.90142567 | 10.45382933 | 8.8003346   | 8.345326967 | 10.19853427 | 10.20411033 |
| "Tpm2"     | 12.49019025 | 11.3066345  | 12.72326475 | 12.98010438 | 12.9341075  | 12.397698   | 12.26832325 | 13.17652325 |
| "Tpm3"     | 8.27170894  | 5.56729192  | 7.558974    | 7.95008992  | 8.553439    | 7.58306808  | 8.06713296  | 8.24234112  |
| "Tpm4"     | 9.198888    | 7.7512918   | 9.679462    | 9.1903105   | 8.962671    | 9.055356    | 9.377681    | 9.364258    |
| "Tpm1t"    | 3.7060785   | 3.13083965  | 2.9390509   | 3.0981291   | 3.0236713   | 2.8435989   | 2.98154765  | 3.0639559   |
| "Tpp1"     | 8.3312985   | 8.03383475  | 8.5300905   | 8.421727    | 8.587743    | 8.3587485   | 8.37532925  | 8.513169    |
| "Tpp2"     | 7.19665426  | 6.81637772  | 6.20747692  | 6.52208658  | 6.49289326  | 6.79272936  | 6.28972294  | 6.44451102  |
| "Tppp3"    | 7.3696795   | 6.147162    | 8.5100765   | 7.82502     | 7.9117346   | 7.2377377   | 7.771197    | 7.4391756   |
| "Tpr"      | 8.117419875 | 8.7034924   | 8.1080214   | 8.55115875  | 8.4315315   | 8.483221525 | 8.345748    | 8.6194467   |
| "Tpra1"    | 5.7409186   | 5.478902    | 5.8590336   | 5.8061604   | 5.829329    | 5.9010754   | 5.776105    | 6.216829    |
| "Tprgl"    | 10.75469    | 11.361341   | 10.971172   | 11.003376   | 10.806294   | 10.818741   | 11.047876   | 11.048997   |
| "Tprkb"    | 5.8780139   | 5.393879333 | 5.4405419   | 5.5883776   | 5.3891878   | 5.337512033 | 5.472154833 | 5.591416267 |
| "Tpsab1"   | 2.4311786   | 2.5368176   | 2.505836    | 2.6011612   | 2.5142004   | 2.5030446   | 2.5098236   | 2.5854192   |
| "Tpsb2"    | 2.1104598   | 2.230983    | 2.14702     | 2.4289224   | 2.1761568   | 2.1206777   | 2.1356542   | 2.218652    |
| "Tpsg1"    | 2.6587296   | 2.7120218   | 2.677312    | 2.7579951   | 2.6583483   | 2.6191278   | 2.6764479   | 2.7623153   |
| "Tpst1"    | 4.84886     | 4.0525556   | 5.9958234   | 5.7507925   | 6.099917    | 5.6212063   | 5.7673464   | 5.743123    |
| "Tpst2"    | 6.3824625   | 6.8174825   | 6.0856857   | 6.269608    | 6.5206075   | 6.735468    | 6.5383606   | 6.5657034   |
| "Tpt1"     | 15.466363   | 15.451866   | 15.395796   | 15.367122   | 15.392959   | 15.393442   | 15.402748   | 15.284787   |
| "Tpte"     | 2.3810272   | 2.4460962   | 2.4212112   | 2.5030465   | 2.426012    | 2.3805523   | 2.4196625   | 2.513447    |
| "Tpx2"     | 3.2566636   | 3.3697371   | 3.3516154   | 3.506968    | 3.355793    | 3.2228758   | 3.342698    | 3.4537306   |
| "Tra2a"    | 8.424181    | 8.04354     | 8.110861    | 8.256218    | 8.1713705   | 8.3479      | 8.501732    | 8.896504    |
| "Tra2b"    | 9.623819    | 9.7581075   | 9.365607    | 9.3324845   | 9.0502895   | 9.38576     | 9.2806925   | 9.23022     |
| "Trabd"    | 6.20039655  | 6.3414507   | 5.9184323   | 6.249067    | 6.15507585  | 6.186871    | 6.2445155   | 6.2286072   |
| "Tradd"    | 3.4239595   | 3.4876964   | 3.4902421   | 3.54280805  | 3.4559951   | 3.4758663   | 3.4182806   | 3.5341663   |
| "Traf2"    | 5.2479124   | 4.023634    | 5.150264    | 5.395269    | 4.9586105   | 4.9406624   | 5.1375117   | 4.999722    |
| "Traf3"    | 4.29220415  | 3.8615195   | 4.87135935  | 4.9347289   | 3.7717836   | 4.1292255   | 4.89891335  | 4.8309536   |
| "Traf3ip2" | 5.2589145   | 8.326481    | 3.8457751   | 5.0447874   | 4.601237    | 6.0391493   | 4.2131658   | 4.696924    |
| "Traf4"    | 2.4022515   | 2.414269    | 2.4077895   | 2.4539323   | 2.4079852   | 2.3945024   | 2.4066107   | 2.4533806   |
| "Traf5"    | 2.6986616   | 2.8987608   | 3.0566552   | 3.2278626   | 3.4525259   | 4.5107718   | 3.68875     | 3.5980446   |
| "Traf6"    | 3.7793922   | 4.4723823   | 3.9880153   | 4.1016046   | 4.0499946   | 4.328146    | 3.75630085  | 3.89812195  |
| "Traf7"    | 5.6299677   | 5.9854956   | 6.0085835   | 6.038921    | 6.208885    | 6.1643186   | 5.9814906   | 5.8165483   |

|            |             |             |             |             |             |             |             |             |
|------------|-------------|-------------|-------------|-------------|-------------|-------------|-------------|-------------|
| "Trafd1"   | 8.887194    | 8.868131    | 7.9468503   | 7.807008    | 8.621104    | 9.489087    | 8.241939    | 7.6747146   |
| "Traip"    | 2.9940948   | 3.1284502   | 3.000334    | 3.1896164   | 2.9886718   | 3.0206654   | 2.9987369   | 3.0805936   |
| "Trak1"    | 5.67029175  | 4.8799814   | 5.86158785  | 5.9198318   | 5.5018323   | 4.91519615  | 6.39359075  | 6.0314094   |
| "Tram1"    | 5.5140377   | 4.82101965  | 5.75992745  | 5.423954    | 5.41061965  | 5.4856659   | 5.4922575   | 5.510196    |
| "Tram1l1"  | 2.4698      | 2.6059175   | 2.5632827   | 2.6506784   | 2.5794032   | 2.490684    | 2.5619752   | 2.6378849   |
| "Tram2"    | 3.2658532   | 2.735127    | 2.5847561   | 2.6516201   | 2.6562505   | 2.951626    | 2.642794    | 2.6713166   |
| "Trap1"    | 8.347556    | 8.928757    | 8.825441    | 9.0993105   | 8.6782565   | 8.5339638   | 8.7576935   | 8.934731    |
| "Trap1a"   | 2.4467793   | 2.5592725   | 2.4939246   | 2.6192338   | 2.5007343   | 2.4640646   | 2.4926744   | 2.5844426   |
| "Trappc1"  | 8.802715    | 8.692571    | 8.83346     | 8.919041    | 8.618934    | 8.346761    | 8.901338    | 8.880378    |
| "Trappc10" | 8.717825    | 9.324707    | 8.898355    | 9.154532    | 8.937803    | 9.055347    | 8.874454    | 9.115541    |
| "Trappc2"  | 8.008028    | 8.472803    | 9.269581    | 9.269875    | 8.627547    | 8.432457    | 9.047128    | 9.15026     |
| "Trappc2l" | 9.861315    | 9.731753    | 10.344799   | 10.15013    | 9.885735    | 9.376217    | 10.601297   | 10.130596   |
| "Trappc3"  | 6.024755    | 6.3061037   | 6.2042866   | 5.8819757   | 6.1970673   | 6.3171372   | 6.1273737   | 6.1876264   |
| "Trappc4"  | 7.744098    | 7.5394263   | 8.18415     | 8.012937    | 7.9022527   | 8.176546    | 8.497974    | 7.881818    |
| "Trappc5"  | 5.6933885   | 6.24743065  | 5.90945865  | 6.11381005  | 5.92214605  | 5.5219409   | 6.03888855  | 5.92769815  |
| "Trappc6a" | 5.6772213   | 4.881955    | 5.1140933   | 4.30651     | 5.42337     | 5.4649305   | 5.8712835   | 4.7641068   |
| "Trat1"    | 2.3445086   | 2.5211236   | 2.4390702   | 2.5687444   | 2.430778    | 2.417393    | 2.4244237   | 2.5295055   |
| "Trav9d-3" | 2.61401085  | 2.722405    | 2.8191358   | 2.754855325 | 2.6940741   | 4.567617375 | 2.6578959   | 2.74983985  |
| "Trdmt1"   | 4.21021725  | 4.2335453   | 4.52530335  | 4.3943511   | 4.48078655  | 4.19979725  | 4.40293615  | 4.3911766   |
| "Trdn"     | 10.59341137 | 11.18313083 | 10.95095205 | 11.19388685 | 10.88002165 | 10.4989949  | 10.56041488 | 11.09401733 |
| "Treh"     | 2.6870654   | 2.7830586   | 2.7465322   | 2.8578894   | 2.7473752   | 2.715493    | 2.7336926   | 2.8322644   |
| "Trem2"    | 2.68949535  | 2.67254025  | 2.5480586   | 2.67414235  | 2.5477606   | 2.50126135  | 2.607447    | 2.614523    |
| "Trh"      | 2.325628    | 2.4905841   | 2.4383328   | 2.539921    | 2.501643    | 2.4327962   | 2.4540384   | 2.5440698   |
| "Trhr"     | 2.512671    | 2.6330924   | 2.5634475   | 2.6989574   | 2.5731182   | 2.5170097   | 2.563942    | 2.6821394   |
| "Triap1"   | 7.0070057   | 7.5685897   | 6.9563193   | 6.9171014   | 6.7121525   | 6.8097396   | 6.800315    | 7.1357365   |
| "Trib1"    | 5.09253085  | 4.9477763   | 4.2366081   | 4.19676435  | 4.08957995  | 4.1897078   | 4.4089335   | 3.8431021   |
| "Trib2"    | 4.7615555   | 4.5525785   | 5.4182719   | 5.5650992   | 4.7101624   | 4.90131325  | 5.35910265  | 5.5879764   |
| "Trib3"    | 3.619839    | 3.5078918   | 3.3420814   | 3.448141    | 3.46008335  | 4.095652    | 3.1962087   | 3.44585535  |
| "Tril"     | 2.63539135  | 2.80392085  | 3.6656766   | 3.0688775   | 2.79860225  | 2.76615185  | 2.7434834   | 3.01379465  |
| "Trim10"   | 2.700427    | 2.812899    | 2.7497902   | 2.8175325   | 2.816903    | 2.7310138   | 2.7383862   | 2.815144    |
| "Trim11"   | 5.7435155   | 5.662082    | 4.8709273   | 4.6867213   | 5.668569    | 6.130808    | 5.182405    | 4.9730554   |
| "Trim12a"  | 3.2717543   | 3.6475283   | 3.51605395  | 3.82192175  | 3.7739656   | 3.9920014   | 3.6373794   | 3.830366    |
| "Trim13"   | 5.0445952   | 5.7131953   | 7.1486073   | 6.815321    | 6.2745442   | 4.9531164   | 6.2558894   | 6.666237    |
| "Trim15"   | 2.3740454   | 2.428873    | 2.3987472   | 2.4805045   | 2.3988588   | 2.3696954   | 2.3979027   | 2.4789648   |
| "Trim16"   | 4.850141    | 4.7633243   | 5.9109104   | 6.54587915  | 4.90251     | 3.4601118   | 5.4876347   | 6.0072509   |
| "Trim2"    | 3.531482075 | 3.600219075 | 3.989705125 | 3.37658405  | 3.564346225 | 3.826340325 | 3.38785545  | 3.530430075 |
| "Trim21"   | 5.197428    | 5.163611    | 5.4451756   | 5.326573    | 5.0823855   | 5.3454223   | 5.8879814   | 5.546672    |
| "Trim23"   | 8.125226    | 8.470232    | 8.232972    | 8.553226    | 8.396943    | 8.1550455   | 8.141291    | 8.796366    |
| "Trim24"   | 5.6374236   | 6.16016765  | 5.6475996   | 6.10494835  | 5.8972899   | 5.9308785   | 5.6316537   | 5.90890135  |
| "Trim25"   | 7.050103133 | 6.1745332   | 6.087224833 | 5.743288767 | 6.180847733 | 6.909578533 | 6.653528667 | 5.964674433 |
| "Trim26"   | 4.0964555   | 4.11680735  | 4.090034    | 4.21848615  | 4.01794075  | 4.2592887   | 4.08369     | 4.09583045  |
| "Trim27"   | 6.444731175 | 6.22707285  | 6.406117275 | 6.504435    | 6.4737935   | 6.45147085  | 6.495797875 | 6.586014625 |
| "Trim28"   | 7.60915     | 7.648353    | 7.3467712   | 7.194166    | 7.655137    | 7.6794252   | 7.2682104   | 7.15276     |
| "Trim29"   | 2.2914574   | 2.2084296   | 3.977961    | 2.2310324   | 2.187533    | 2.1721745   | 2.1456988   | 2.2309349   |
| "Trim3"    | 3.467105    | 3.8546078   | 3.2579875   | 3.8920672   | 4.171129    | 4.0621643   | 3.7269437   | 3.8929143   |
| "Trim30a"  | 5.05769335  | 4.11625565  | 5.0334704   | 4.98353695  | 5.150397    | 6.451147    | 6.46215025  | 5.4291822   |
| "Trim30d"  | 2.5047846   | 2.602931    | 2.6397831   | 2.7696903   | 2.5795114   | 2.6064243   | 2.5611792   | 2.7011607   |
| "Trim32"   | 5.5875783   | 5.1467314   | 6.2074175   | 6.66053     | 6.0430245   | 5.7296944   | 6.648704    | 6.9001236   |
| "Trim33"   | 7.6580915   | 7.870713    | 7.389012    | 7.4007807   | 7.858966    | 8.009545    | 7.757383    | 7.444276    |
| "Trim34a"  | 2.650834675 | 2.873876825 | 3.099044825 | 3.192136875 | 3.163517225 | 3.7613326   | 3.316559875 | 3.398496325 |
| "Trim37"   | 3.302767875 | 3.327405925 | 3.5090891   | 3.49436475  | 3.60385805  | 3.683020975 | 3.735622625 | 3.606444975 |
| "Trim39"   | 6.011821    | 7.1962905   | 4.958785    | 4.9416327   | 6.186634    | 7.0589314   | 5.28446     | 5.7648287   |
| "Trim41"   | 6.290068    | 7.2143035   | 6.4704986   | 6.6925726   | 7.002563    | 7.25245     | 6.189507    | 6.677601    |
| "Trim44"   | 5.6115819   | 5.6540645   | 5.57371925  | 5.4365273   | 5.67877325  | 5.5558428   | 6.076173    | 5.59743035  |
| "Trim47"   | 4.3215327   | 3.7706745   | 5.035109    | 4.6224127   | 4.921642    | 4.598707    | 4.803938    | 4.6041594   |
| "Trim54"   | 11.618826   | 12.864411   | 11.708817   | 12.061518   | 11.853458   | 12.465641   | 11.584012   | 11.741623   |
| "Trim59"   | 2.679643    | 2.7628293   | 2.7120085   | 2.827933    | 2.7038717   | 4.309426    | 2.694035    | 2.819477    |
| "Trim60"   | 2.618322    | 2.8205576   | 2.6417973   | 2.789402    | 2.6446235   | 2.6127057   | 2.6313183   | 2.7450612   |
| "Trim62"   | 2.798057033 | 2.982026567 | 2.8978358   | 3.099156067 | 2.919821767 | 2.8577234   | 2.912728333 | 3.027343833 |
| "Trim69"   | 2.420475    | 2.538385    | 2.4637513   | 2.6094646   | 2.4971662   | 2.431263    | 2.5388584   | 2.5929084   |
| "Trim7"    | 2.852227    | 3.1376891   | 3.7315084   | 4.17528165  | 3.072855    | 2.93713045  | 3.1498953   | 4.1302548   |
| "Trim8"    | 4.7701205   | 4.5503374   | 4.7412225   | 4.8872169   | 4.73847465  | 4.43290465  | 4.786453    | 4.80362855  |
| "Trio"     | 7.51459425  | 7.50590025  | 7.74621265  | 7.4903945   | 7.43922065  | 7.62507715  | 7.35643525  | 7.6590615   |
| "Triobp"   | 7.53042     | 7.676417    | 6.888213    | 8.078844    | 7.893795    | 7.373431    | 8.045307    | 8.040892    |
| "Trip10"   | 8.953963    | 9.521177    | 9.400005    | 9.481651    | 9.358593    | 9.003275    | 9.2222595   | 9.429886    |
| "Trip11"   | 8.30365525  | 8.653593    | 8.6920825   | 8.8841385   | 8.2968845   | 8.626513    | 8.6874085   | 8.941367    |
| "Trip12"   | 6.19067674  | 6.73943086  | 6.51674924  | 6.579798    | 6.34130634  | 6.29994816  | 6.38425842  | 6.59937386  |
| "Trip13"   | 2.89146985  | 3.10685685  | 2.96523285  | 3.08589205  | 2.96037055  | 2.9240147   | 2.97870625  | 3.0505325   |
| "Trip4"    | 4.185117733 | 4.348448967 | 3.931374    | 3.797503233 | 4.145031733 | 4.078611467 | 4.052483667 | 4.053696033 |
| "Trip6"    | 4.7538776   | 3.7641773   | 4.9904847   | 4.6952085   | 5.1163545   | 4.8854628   | 5.335094    | 4.650294    |
| "Trit1"    | 7.148364    | 7.4168696   | 6.892384    | 7.0497723   | 8.027551    | 8.044314    | 7.7226753   | 7.4337025   |
| "Trmt1"    | 7.280221433 | 8.0093925   | 7.0627096   | 6.877209667 | 7.125402667 | 7.6277754   | 7.3087942   | 7.316047333 |
| "Trmt112"  | 10.510496   | 10.913999   | 10.480272   | 10.130166   | 10.447395   | 10.746465   | 10.840806   | 10.164855   |
| "Trmt2a"   | 5.6596616   | 6.100264    | 5.512722333 | 5.5504812   | 5.9366409   | 6.114850133 | 5.6047371   | 5.378531967 |
| "Trmt5"    | 4.6620703   | 4.2008424   | 4.687682    | 4.580325    | 4.6818833   | 4.085993    | 5.13819     | 4.5495586   |
| "Trnt1"    | 6.22327625  | 7.2660995   | 6.22271285  | 6.548464    | 6.442648    | 6.7932832   | 6.3324975   | 6.63910485  |
| "Tro"      | 2.3359177   | 2.41099785  | 2.3885452   | 2.4723027   | 2.36971615  | 2.33820675  | 2.3681992   | 2.4268023   |
| "Trove2"   | 2.953625    | 3.3656673   | 3.3080611   | 3.5294905   | 3.6862786   | 3.2570603   | 3.534678    | 3.5369701   |
| "Trp53"    | 2.7894959   | 2.833832567 | 2.719665667 | 2.898570833 | 2.889697333 | 2.7356831   | 2.8066295   | 2.882803767 |
| "Trp53bp1" | 6.27149365  | 5.555066    | 6.72699905  | 6.69252935  | 6.326814    | 6.27878035  | 6.9891705   | 6.8243405   |
| "Trp53i13" | 3.134561    | 3.1296456   | 3.4133976   | 3.497823    | 3.545769    | 3.596507    | 3.3365092   | 3.3809936   |

|             |             |             |             |             |             |             |             |             |
|-------------|-------------|-------------|-------------|-------------|-------------|-------------|-------------|-------------|
| "Trp53inp1" | 7.743901    | 7.64112235  | 5.5144647   | 5.5879663   | 6.91148045  | 8.203534    | 5.9033476   | 5.67533705  |
| "Trp53inp2" | 10.69967    | 9.648256    | 11.072867   | 11.699546   | 10.805606   | 10.036811   | 10.729226   | 11.396155   |
| "Trp53rk"   | 2.7369962   | 4.3924103   | 3.2981162   | 3.3895218   | 3.0889132   | 3.254544    | 3.3424115   | 3.3672552   |
| "Trp63"     | 4.9722264   | 3.7778035   | 3.92995085  | 3.5399023   | 3.83261815  | 2.96849     | 4.3483007   | 3.07919645  |
| "Trpc1"     | 3.3495471   | 3.6192212   | 3.5854058   | 4.0279307   | 3.6296608   | 4.3424788   | 3.5952523   | 3.6345277   |
| "Trpc2"     | 2.6290277   | 3.23715535  | 3.4388786   | 3.4673463   | 3.05046595  | 3.2339096   | 3.39119545  | 3.5792551   |
| "Trpc3"     | 3.8952994   | 4.373089    | 4.3182197   | 5.3462806   | 4.245937    | 4.012126    | 4.239199    | 5.377171    |
| "Trpc4"     | 2.4993896   | 2.6178768   | 2.554807    | 2.6590095   | 2.5638304   | 2.558537    | 2.553682    | 2.6193767   |
| "Trpc4ap"   | 5.9049816   | 6.162293    | 5.586019    | 5.658492    | 5.6986065   | 5.7923646   | 5.739809    | 5.5963354   |
| "Trpc6"     | 2.8126092   | 3.0417519   | 2.933639    | 3.1578133   | 2.9617112   | 2.8245678   | 2.9212928   | 3.063697    |
| "Trpc7"     | 3.045769    | 3.081468    | 3.0851865   | 3.1829534   | 3.058409    | 3.069676    | 3.0019476   | 3.1533077   |
| "Trpm1"     | 2.8874996   | 3.0941653   | 2.9502118   | 3.1027768   | 3.126131    | 2.8705888   | 2.9365466   | 3.0772903   |
| "Trpm5"     | 2.969812    | 3.1042838   | 3.0047693   | 3.0867772   | 3.1180398   | 2.9678636   | 2.8293657   | 3.0809262   |
| "Trpm6"     | 2.3648448   | 2.4100988   | 2.4001439   | 2.5237236   | 2.4148123   | 2.3592749   | 2.4063985   | 2.5349483   |
| "Trpm7"     | 7.5885502   | 8.032579333 | 7.637245667 | 8.344295    | 7.911064433 | 7.8496621   | 7.582684333 | 8.27948367  |
| "Trpm8"     | 2.8055458   | 3.0947526   | 2.8972483   | 3.074706    | 2.9153447   | 2.820887    | 2.890836    | 3.0353022   |
| "Trps1"     | 3.2782257   | 3.4683652   | 3.7758799   | 3.748848    | 3.5527272   | 3.5033326   | 3.2986605   | 4.521477    |
| "Trpt1"     | 6.661693    | 7.040865    | 7.40744     | 7.598812    | 7.4391212   | 6.7845507   | 7.1044993   | 7.31265     |
| "Trpv2"     | 3.4453712   | 3.3809621   | 3.3700728   | 3.4466      | 3.5174034   | 4.070625    | 3.4007547   | 3.3520372   |
| "Trpv6"     | 2.4496607   | 2.5248382   | 2.4940443   | 2.5792186   | 2.5082076   | 2.45614     | 2.4976933   | 2.5992038   |
| "Trrap"     | 6.813596    | 6.9925056   | 7.1590157   | 6.560177    | 7.0152516   | 7.150941    | 7.329258    | 6.678324    |
| "Trub2"     | 7.019453767 | 7.365288667 | 7.036339867 | 7.571898667 | 7.1555463   | 7.167544433 | 7.104755    | 7.542374667 |
| "Try4"      | 6.903418    | 2.4895413   | 2.4613788   | 2.5215712   | 2.4383214   | 2.4014468   | 2.4362245   | 2.5352736   |
| "Tsc1"      | 5.68881255  | 6.4281158   | 5.7466925   | 5.87703825  | 5.767764    | 5.8523966   | 5.71720015  | 5.905939    |
| "Tsc2"      | 6.50506     | 6.9396243   | 6.6869593   | 7.0210776   | 6.6436577   | 6.374503    | 7.025333    | 7.107706    |
| "Tsc22d1"   | 9.50144834  | 9.37453796  | 8.6548825   | 8.96337828  | 8.915668    | 9.17908236  | 9.01032228  | 8.85448708  |
| "Tsc22d3"   | 10.37938383 | 10.78729517 | 9.127416167 | 9.304219    | 9.818353667 | 10.5039941  | 9.538054167 | 9.513084    |
| "Tsc22d4"   | 6.3778543   | 5.921364    | 6.9848595   | 6.7817225   | 6.756167    | 6.5230193   | 7.1672072   | 6.7902274   |
| "Tsen15"    | 7.3640137   | 7.8141413   | 7.805525    | 7.814777    | 7.5121384   | 7.6792164   | 7.8434854   | 7.68628     |
| "Tsen34"    | 6.89344     | 6.398608    | 7.359931    | 7.3489857   | 6.9429464   | 6.8294606   | 7.2500076   | 7.256193    |
| "Tsg101"    | 8.336107    | 8.742033    | 8.707145    | 8.739484    | 8.519873    | 8.3955145   | 8.982599    | 8.810633    |
| "Tsga8"     | 2.5021567   | 2.623633    | 2.5865016   | 2.679795    | 2.5878067   | 2.5603561   | 2.5843852   | 2.657928    |
| "Tshb"      | 2.4303627   | 2.462631    | 2.45093     | 2.5259073   | 2.4506955   | 2.4116747   | 2.447339    | 2.504894    |
| "Tshr1"     | 2.68931305  | 2.86824385  | 3.01827395  | 2.8240018   | 2.8338092   | 2.85826015  | 2.8032863   | 2.7999909   |
| "Tshz1"     | 7.695875    | 8.1148822   | 7.5662365   | 7.5641763   | 8.0723058   | 7.867009    | 7.097981    | 7.73232     |
| "Tshz2"     | 2.278657    | 2.3247056   | 2.3242784   | 2.3801296   | 2.3097892   | 2.3043294   | 2.4417667   | 2.3807447   |
| "Tsk5"      | 5.378314    | 6.369942    | 6.586793    | 6.249784    | 6.488944    | 5.60219     | 5.9704237   | 5.75434     |
| "Tsku"      | 2.8112268   | 2.923068    | 2.9087      | 3.4398346   | 2.986413    | 2.7807531   | 2.8494048   | 2.9725127   |
| "Tslp"      | 2.5343225   | 2.705494    | 2.6818566   | 2.8019667   | 2.6566467   | 2.8285782   | 2.6809232   | 2.76049     |
| "Tsn"       | 7.982608625 | 8.585554075 | 8.59939915  | 8.61678795  | 8.2700079   | 8.30215475  | 8.327537675 | 8.63249075  |
| "Tsnax"     | 6.05835475  | 6.89941675  | 6.44325745  | 6.4360873   | 6.36153515  | 6.9099385   | 6.7437135   | 6.5212007   |
| "Tsnaxip1"  | 2.463138    | 2.6536536   | 2.595801    | 2.7209275   | 2.5980484   | 2.5475016   | 2.5890245   | 2.693914    |
| "Tspan1"    | 2.4825878   | 2.587472    | 2.5237296   | 2.6525726   | 2.5255206   | 2.4776285   | 2.5218728   | 2.6296675   |
| "Tspan12"   | 6.870754    | 4.613351    | 6.1092367   | 6.170995    | 6.745626    | 5.4025464   | 6.1904364   | 6.2942843   |
| "Tspan13"   | 8.395346    | 8.09508025  | 8.7549655   | 9.005797    | 8.818774    | 8.7762      | 9.4176605   | 9.074133    |
| "Tspan14"   | 6.339803    | 6.8548746   | 6.4327345   | 5.5392275   | 7.1039286   | 7.46548     | 6.730345    | 6.0274305   |
| "Tspan15"   | 3.3707266   | 4.534158    | 3.169363    | 3.356457    | 3.7966719   | 4.186307    | 3.57110852  | 3.1456914   |
| "Tspan17"   | 4.58537505  | 4.87862035  | 5.11346465  | 4.9825989   | 4.6484435   | 4.658879    | 5.096354    | 4.74050935  |
| "Tspan2"    | 3.789727    | 3.5700389   | 4.6937219   | 4.44919675  | 4.03427265  | 4.0900061   | 4.26320755  | 4.73794715  |
| "Tspan3"    | 10.09854    | 9.866254    | 10.8557005  | 10.927108   | 10.663296   | 9.956082    | 10.505001   | 10.765011   |
| "Tspan31"   | 7.5365606   | 6.648230667 | 7.1822508   | 7.068565767 | 6.961766    | 6.6645537   | 7.209924933 | 7.024721633 |
| "Tspan32"   | 2.8856378   | 2.9447541   | 2.8869922   | 2.9639168   | 2.8855727   | 4.541369    | 2.8766325   | 2.9551895   |
| "Tspan33"   | 3.651534167 | 3.498904867 | 3.392964867 | 3.501460533 | 3.422200967 | 3.416748133 | 3.398607433 | 3.502025467 |
| "Tspan4"    | 7.822434    | 6.7134004   | 7.512148    | 7.543145    | 8.20183     | 7.450924    | 8.133677    | 7.8653994   |
| "Tspan5"    | 2.62263275  | 3.76075525  | 2.3817482   | 2.4335334   | 2.37122765  | 2.9086918   | 2.3706187   | 2.4500041   |
| "Tspan6"    | 3.0288688   | 3.2298918   | 4.50175485  | 3.6452956   | 3.94357025  | 3.3736557   | 3.8404802   | 4.7037409   |
| "Tspan7"    | 7.44047975  | 7.2079275   | 7.72645675  | 7.674119    | 7.6115307   | 6.9508037   | 7.7503685   | 7.7608952   |
| "Tspan8"    | 5.291513725 | 6.07692705  | 6.688040825 | 5.824132875 | 5.91861835  | 5.327249025 | 5.259697625 | 6.106708225 |
| "Tspan9"    | 6.8048587   | 6.685231    | 7.119023    | 7.1598787   | 6.2035303   | 6.1843257   | 6.837391    | 6.5379257   |
| "Tspo"      | 9.024542333 | 6.861656767 | 7.977521    | 6.987553633 | 8.752766    | 8.544933833 | 9.828813    | 7.370556533 |
| "Tspo2"     | 2.6188595   | 2.740908    | 2.6682732   | 2.721021    | 2.670585    | 2.6582878   | 2.6261497   | 2.6978426   |
| "Tspyl1"    | 6.8063765   | 7.30913075  | 7.1807427   | 7.489431    | 7.0827035   | 6.837446    | 6.8852085   | 7.5641957   |
| "Tspyl4"    | 3.6703      | 3.111593    | 3.4961169   | 3.6014776   | 3.296609    | 3.220812    | 3.129839    | 3.390697    |
| "Tsr1"      | 7.6279254   | 8.534009    | 6.855124    | 6.4975295   | 7.447002    | 8.200564    | 6.846299    | 7.042415    |
| "Tsr2"      | 4.6317142   | 5.90850045  | 5.009999    | 5.4339528   | 5.1456965   | 5.75345535  | 4.9534805   | 5.2936063   |
| "Tssc1"     | 4.086723    | 4.2721596   | 4.269099    | 4.064667    | 3.5929658   | 3.3264086   | 4.32637     | 4.1821485   |
| "Tssc4"     | 3.5684254   | 4.0383105   | 3.5102034   | 3.204941    | 3.5380752   | 4.0665274   | 3.5921156   | 3.5655625   |
| "Tssk1"     | 3.5664723   | 3.7197344   | 3.6283126   | 3.7387762   | 3.6286159   | 3.5529926   | 3.5988815   | 3.720175    |
| "Tst"       | 4.4078574   | 3.408129    | 3.838483    | 3.8910806   | 3.838614    | 3.8158145   | 3.8443983   | 3.9073458   |
| "Tsta3"     | 8.033257    | 8.279203    | 8.403252    | 8.109528    | 8.026499    | 7.700263    | 8.495442    | 8.09741     |
| "Tstd1"     | 3.3788822   | 3.4379754   | 3.4171002   | 3.4295673   | 3.388676    | 3.360438    | 3.3845048   | 3.413525    |
| "Tstd2"     | 7.152215    | 7.4490848   | 7.6172996   | 8.035947    | 7.6261168   | 7.4809823   | 7.6934423   | 8.384089    |
| "Tsx"       | 2.3826356   | 2.4727435   | 2.418948    | 2.536076    | 2.4253757   | 2.3783972   | 2.4113116   | 2.5220327   |
| "Ttbk2"     | 2.4263535   | 2.5041213   | 2.4603562   | 2.559249    | 2.4617763   | 2.4331903   | 2.4554603   | 2.5292974   |
| "Ttc1"      | 8.271348    | 8.765867    | 8.1145305   | 8.1893228   | 8.1764718   | 8.4721545   | 8.63702135  | 8.0821218   |
| "Ttc13"     | 7.351085467 | 7.483702    | 7.846419167 | 7.917704867 | 7.718549133 | 7.694069333 | 7.9847671   | 7.7365201   |
| "Ttc14"     | 4.923075433 | 5.252398567 | 4.985215333 | 5.0320025   | 5.100923867 | 5.2616181   | 5.121834733 | 5.259675567 |
| "Ttc15"     | 4.504392    | 4.981762    | 4.528541    | 4.6837153   | 4.719209    | 4.8358126   | 4.57736     | 4.652718    |
| "Ttc17"     | 6.419325    | 5.809125    | 6.7530985   | 6.6370974   | 6.091048    | 6.2903743   | 7.2587137   | 6.929063    |
| "Ttc19"     | 7.5633993   | 7.6611648   | 7.690352    | 8.319239    | 7.874877    | 7.3395934   | 7.5672293   | 8.176377    |
| "Ttc23"     | 3.3239768   | 2.9068515   | 3.6917167   | 3.1708221   | 3.1640491   | 2.9891448   | 3.1997375   | 3.2172523   |

|              |             |             |             |             |             |             |             |             |
|--------------|-------------|-------------|-------------|-------------|-------------|-------------|-------------|-------------|
| "Ttc27"      | 5.3304515   | 5.451965    | 4.6125917   | 5.387034    | 4.6529975   | 4.807853    | 5.162221    | 5.303054    |
| "Ttc28"      | 4.81226325  | 5.02373695  | 5.28517355  | 5.3589969   | 5.30179865  | 5.4752631   | 5.12562825  | 5.1204367   |
| "Ttc3"       | 7.507979375 | 8.296866    | 8.07629425  | 8.21420425  | 7.6617627   | 7.497222    | 7.916723    | 8.112362525 |
| "Ttc30a1"    | 3.187027    | 3.3574164   | 3.5189438   | 4.8502383   | 3.534703    | 2.9768512   | 3.5180197   | 4.2340794   |
| "Ttc30b"     | 4.81101     | 4.00369     | 5.4267855   | 5.595002    | 5.198931    | 4.2167883   | 5.3511004   | 5.916168    |
| "Ttc33"      | 10.028478   | 10.940102   | 9.989616    | 10.169778   | 10.343919   | 10.607995   | 9.800646    | 10.283301   |
| "Ttc35"      | 10.705945   | 10.516947   | 10.7999     | 10.966111   | 10.878644   | 10.531473   | 10.859661   | 10.942143   |
| "Ttc36"      | 9.300999    | 1.9246119   | 2.592327    | 1.9697703   | 1.9379311   | 1.9156953   | 1.9021475   | 1.9667705   |
| "Ttc39b"     | 2.9158333   | 2.73018185  | 2.891364325 | 2.743210025 | 2.82361885  | 2.7813625   | 2.71963325  | 2.759051975 |
| "Ttc39c"     | 5.5064325   | 2.5201159   | 2.513156    | 2.5087636   | 2.5798483   | 3.8547568   | 2.845796    | 2.6322718   |
| "Ttc39d"     | 2.3342834   | 2.4351075   | 2.3608792   | 2.4479976   | 2.3626037   | 2.3168197   | 2.3549585   | 2.4399576   |
| "Ttc4"       | 7.39187525  | 7.7223299   | 7.6851726   | 7.8624217   | 7.42413475  | 7.4056602   | 7.3435702   | 7.62178255  |
| "Ttc5"       | 5.4192357   | 5.459059    | 6.1524434   | 5.4426513   | 6.2610354   | 6.1366076   | 6.453853    | 5.6231594   |
| "Ttc7b"      | 5.05196815  | 5.65975835  | 5.3961649   | 5.7533587   | 5.09404625  | 5.1158285   | 5.2574527   | 5.6727426   |
| "Ttc8"       | 4.998196    | 4.208667    | 6.113169    | 5.650707    | 5.056149    | 4.433993    | 6.496371    | 5.6956997   |
| "Ttf1"       | 3.6882925   | 3.957785    | 3.75505355  | 3.761588    | 3.9347169   | 4.38805875  | 3.69039725  | 3.75894215  |
| "Tti1"       | 6.697397    | 7.077313    | 7.158665    | 7.222046    | 6.822853    | 6.4919996   | 7.1007137   | 6.9664288   |
| "Tti2"       | 3.12143025  | 3.56705655  | 3.020844525 | 3.157693625 | 3.1426402   | 3.3394542   | 3.0950942   | 3.182228875 |
| "Tti"        | 3.9427043   | 3.818012275 | 4.351552575 | 4.610014975 | 3.955921975 | 4.014000425 | 4.648549875 | 4.598523775 |
| "Ttl1"       | 4.32063935  | 3.21348035  | 4.2649005   | 4.21769535  | 3.810503    | 3.315316    | 5.0872528   | 4.21682455  |
| "Ttl3"       | 2.53512955  | 2.67860295  | 2.59965875  | 2.7095237   | 2.5980493   | 2.5537969   | 2.57853735  | 2.6738081   |
| "Ttn"        | 14.327809   | 14.82170225 | 14.899646   | 14.8269445  | 14.698723   | 14.5683505  | 14.386608   | 14.860951   |
| "Ttpa"       | 11.32516    | 2.752347    | 4.5108023   | 2.793964    | 3.0909476   | 2.742647    | 2.841621    | 2.9014652   |
| "Ttr"        | 13.80640317 | 3.036834433 | 9.239024    | 2.781901833 | 8.114156067 | 2.426041367 | 2.756024267 | 7.136525    |
| "Ttyh1"      | 2.9236386   | 2.8272247   | 2.696789567 | 2.770939067 | 2.7453373   | 2.663247833 | 2.686148867 | 2.7852436   |
| "Tub"        | 2.8120542   | 3.0278134   | 2.8961203   | 3.025247    | 2.9574282   | 2.8523178   | 2.896329    | 3.040139    |
| "Tuba-rs1"   | 2.6506348   | 2.7397037   | 2.7049541   | 2.7878888   | 2.7179642   | 2.6583233   | 2.7165236   | 2.9097726   |
| "Tuba1a"     | 10.441227   | 8.597382    | 11.241314   | 10.318928   | 9.890207    | 9.7423525   | 11.073054   | 10.285412   |
| "Tuba3a"     | 2.7394001   | 2.7815689   | 2.7616334   | 2.830948    | 2.75921095  | 2.69691545  | 2.75768075  | 2.82714095  |
| "Tuba4a"     | 10.85593847 | 11.20629767 | 11.11712223 | 10.86840667 | 11.07294733 | 10.78328543 | 11.0803106  | 10.7390918  |
| "Tuba8"      | 10.724687   | 11.423364   | 11.642305   | 11.355515   | 11.244097   | 10.580774   | 11.520983   | 11.386837   |
| "Tubb2a-ps2" | 2.9951016   | 3.183757067 | 3.079474133 | 3.241949333 | 3.083061167 | 2.950543933 | 3.070936533 | 3.14603467  |
| "Tubb2a"     | 6.13587575  | 5.03654035  | 5.51506845  | 5.32759     | 5.31409575  | 5.2610141   | 5.7311411   | 5.3844047   |
| "Tubb2b"     | 6.1733603   | 3.7589452   | 5.0494056   | 4.1745043   | 3.8359578   | 3.9940128   | 6.0000772   | 4.469901    |
| "Tubb3"      | 2.9569726   | 3.16683     | 3.003341    | 3.163206    | 3.0150967   | 2.9540799   | 3.0090666   | 3.1052186   |
| "Tubb4b"     | 7.8920563   | 7.89557525  | 7.4665975   | 7.31590825  | 7.9624695   | 7.8873302   | 7.7376102   | 7.3352246   |
| "Tubb5"      | 7.884751    | 6.8633258   | 8.01184975  | 7.2109975   | 7.774656    | 8.0977262   | 8.2161315   | 7.445512    |
| "Tubb6"      | 9.448956    | 7.1665163   | 7.4711566   | 6.3458157   | 7.387489    | 7.5278025   | 9.731952    | 6.5852685   |
| "Tubd1"      | 4.5033927   | 4.5066223   | 4.729214    | 4.8319154   | 3.9420588   | 4.0706577   | 4.7065105   | 5.1272044   |
| "Tubg1"      | 6.732037    | 6.743843    | 7.2221417   | 7.3928432   | 6.5338216   | 6.2078285   | 7.4226675   | 7.0132213   |
| "Tubg2"      | 2.426804    | 2.5889895   | 2.4355853   | 2.5240276   | 2.4483867   | 2.4025598   | 2.4468856   | 2.5234864   |
| "Tubgcp2"    | 6.0677586   | 7.2622576   | 6.64175     | 6.75308     | 6.547028    | 6.1212816   | 6.3267617   | 6.8270593   |
| "Tubgcp3"    | 5.486588    | 5.8038416   | 4.992399    | 5.4941874   | 5.803643    | 5.7215495   | 5.547667    | 5.710074    |
| "Tubgcp4"    | 4.8754325   | 4.8102141   | 4.5697321   | 4.9571733   | 4.67112315  | 4.89223645  | 4.91907655  | 4.95851575  |
| "Tubgcp5"    | 4.43062     | 5.243826    | 5.4183836   | 5.0957155   | 5.155531    | 5.0036097   | 5.3413453   | 5.2153597   |
| "Tufm"       | 5.48854515  | 5.4394346   | 5.4950632   | 5.6769675   | 5.5206262   | 5.4395374   | 5.50793705  | 5.5936298   |
| "Tug1"       | 5.9394951   | 6.3703826   | 6.21602085  | 6.148836    | 6.199103    | 6.618623    | 6.274395    | 6.1483583   |
| "Tulp1"      | 2.3489354   | 2.3900576   | 2.3861017   | 2.4611292   | 2.3889408   | 2.3455439   | 2.3861065   | 2.4355092   |
| "Tulp2"      | 2.508698    | 2.5977309   | 2.539378    | 2.6702347   | 2.547145    | 2.5333707   | 2.5434303   | 2.6433284   |
| "Tulp3"      | 4.2913637   | 4.3405337   | 4.3131676   | 4.403647    | 4.589645    | 4.333545    | 4.271632    | 4.3755026   |
| "Tulp4"      | 8.07709725  | 8.75083975  | 8.5913565   | 8.8161342   | 8.1431625   | 8.2126375   | 8.2234709   | 8.684889    |
| "Tusc2"      | 7.3162947   | 8.292553    | 7.394969    | 7.627435    | 7.477147    | 7.4880047   | 7.130362    | 7.6421146   |
| "Tusc3"      | 5.2102084   | 4.8944836   | 5.9170547   | 5.5346427   | 5.285592    | 5.211302    | 5.2216425   | 5.7529917   |
| "Tut1"       | 4.4803934   | 5.5180526   | 3.7537522   | 4.139761    | 4.3485265   | 4.805797    | 4.3294005   | 3.785539    |
| "Twf2"       | 10.9383695  | 11.067117   | 9.74030775  | 10.4868275  | 11.1827035  | 11.6986035  | 9.885331    | 10.8621455  |
| "Twist1"     | 2.9419324   | 3.2062829   | 3.1800783   | 3.2603593   | 3.9147208   | 3.167467    | 3.5041027   | 3.2919612   |
| "Twist2"     | 2.5695555   | 2.7961886   | 2.8154244   | 2.8452623   | 2.8012004   | 2.787086    | 2.8291607   | 3.0934305   |
| "Twsg1"      | 7.507825    | 6.091642    | 7.7456737   | 7.4422293   | 7.575006    | 6.9529753   | 7.732357    | 7.7216454   |
| "Txlnb"      | 9.479019    | 10.291001   | 10.571139   | 10.7100025  | 10.4940025  | 10.0858055  | 9.774715    | 10.76216625 |
| "Txlng"      | 7.684097    | 8.3943405   | 6.684043    | 6.3562164   | 8.01473     | 8.712788    | 6.9954996   | 7.092834    |
| "Txn1"       | 11.846251   | 10.669086   | 11.385737   | 11.079639   | 11.237269   | 11.72448    | 11.979882   | 11.128734   |
| "Txn2"       | 9.3444685   | 9.202745833 | 9.143178667 | 9.368138    | 9.173361    | 8.845811333 | 9.180833667 | 9.257934333 |
| "Txndc11"    | 4.7863045   | 3.8133848   | 3.7725117   | 3.6400833   | 3.8044295   | 3.7937026   | 3.799849    | 3.8281012   |
| "Txndc12"    | 5.8602777   | 5.4417253   | 5.5044737   | 5.496487    | 5.743085    | 5.6127615   | 5.6242466   | 5.490982    |
| "Txndc16"    | 5.918443    | 6.29051     | 6.654687    | 6.4260025   | 5.9170523   | 5.8158712   | 5.9919167   | 6.5303173   |
| "Txndc17"    | 8.02313785  | 7.753718025 | 8.0455111   | 8.1098801   | 7.97391915  | 7.761400825 | 8.289290675 | 8.116129    |
| "Txndc5"     | 6.61491435  | 5.93369925  | 7.8142088   | 7.2187762   | 6.92516965  | 7.13229155  | 7.4733069   | 7.11553815  |
| "Txndc8"     | 2.8536222   | 2.9941523   | 2.945765    | 3.0773396   | 2.9369106   | 2.913045    | 2.9230418   | 3.0412858   |
| "Txndc9"     | 9.0826485   | 9.623652    | 8.832522    | 9.264373    | 9.285963    | 9.4424855   | 8.9619865   | 9.303358    |
| "Txnip"      | 12.09998775 | 12.6045475  | 10.7287175  | 10.62905    | 12.1830035  | 12.419085   | 11.187662   | 10.9695905  |
| "Txnl1"      | 6.1227823   | 6.54763945  | 5.91670585  | 5.97854645  | 6.187954767 | 6.59990725  | 6.0079565   | 6.118888267 |
| "Txnl4a"     | 6.017354    | 5.8423966   | 5.755776    | 6.2188464   | 5.9587026   | 6.144348    | 6.45467275  | 5.89834325  |
| "Txnrd1"     | 6.37353755  | 6.1713834   | 5.71144525  | 5.99901725  | 6.0648555   | 6.3512919   | 5.7366029   | 5.9192286   |
| "Txnrd2"     | 5.1496085   | 5.40758205  | 4.912515    | 5.20763135  | 4.98938425  | 5.0509446   | 5.37616185  | 5.151216    |
| "Txnrd3"     | 3.901058867 | 4.485832033 | 4.0315748   | 4.252655567 | 4.1099829   | 3.8623869   | 3.576964033 | 3.6556642   |
| "Tyk2"       | 5.397121    | 4.7782      | 5.8913746   | 5.0506825   | 5.088498    | 5.1672993   | 5.782511    | 5.013728    |
| "Tyms-ps"    | 2.7370481   | 2.9118316   | 2.7996032   | 2.9199705   | 2.8090665   | 2.7401338   | 2.801471    | 2.9365454   |
| "Tyms"       | 2.50308945  | 2.59643065  | 2.5520968   | 2.65965825  | 2.559995925 | 2.6015152   | 2.549773575 | 2.641319075 |
| "Tyr"        | 3.175014    | 3.4714367   | 3.277614    | 3.4589458   | 3.2974544   | 3.1978931   | 3.269637    | 3.4159029   |
| "Tyro3"      | 2.34136165  | 2.53682795  | 2.3797337   | 2.4819132   | 2.3776486   | 2.3415582   | 2.37936565  | 2.4488138   |
| "Tyrobp"     | 8.97345     | 4.6077614   | 7.7764006   | 6.263856    | 7.912527    | 8.620482    | 8.753216    | 6.8491974   |

|           |             |             |             |             |             |             |             |             |
|-----------|-------------|-------------|-------------|-------------|-------------|-------------|-------------|-------------|
| "Tyrp1"   | 2.3458467   | 2.4127398   | 2.3717234   | 2.4856768   | 2.371205    | 2.3410738   | 2.370308    | 2.4623175   |
| "Tysnd1"  | 5.7103705   | 6.390627    | 4.7700415   | 4.952394    | 5.9397635   | 5.181572    | 5.037013    | 4.838559    |
| "Tyw1"    | 4.4751377   | 4.4570885   | 4.429863    | 4.5072393   | 4.615649    | 4.453554    | 4.3635664   | 4.5123005   |
| "U05342"  | 8.468975    | 8.821823    | 8.8498955   | 9.298165    | 8.416715    | 8.47396     | 8.875407    | 8.896883    |
| "U2af1"   | 10.004645   | 10.3809185  | 9.618719    | 9.561157    | 9.858279    | 10.222561   | 9.619197    | 9.460394    |
| "U2af1l4" | 8.117627    | 8.3971195   | 8.774239    | 8.80095     | 8.171764    | 8.036622    | 8.313005    | 8.70047     |
| "U2af2"   | 5.891905    | 6.0015597   | 5.9363394   | 5.9461303   | 5.9046416   | 5.8992043   | 5.8934765   | 5.9384317   |
| "Uap1"    | 6.4296339   | 6.565629    | 6.7338517   | 7.14298734  | 6.6907243   | 6.9181426   | 6.86892708  | 6.9544956   |
| "Uap1l1"  | 3.9084284   | 2.8067415   | 2.8868556   | 2.999499    | 3.648146    | 3.8867612   | 3.4872313   | 3.0527406   |
| "Uba1"    | 8.489652    | 8.59651     | 8.501563    | 8.584293    | 8.548617    | 8.21651     | 8.571579    | 8.219635    |
| "Uba2"    | 9.611691625 | 9.88671775  | 10.1578435  | 10.35980625 | 9.70080575  | 9.079877625 | 9.79526425  | 10.00580025 |
| "Uba3"    | 8.298347    | 8.281272333 | 8.6706758   | 8.933754433 | 8.469938333 | 8.199681667 | 8.838301667 | 8.864622333 |
| "Uba5"    | 7.6668677   | 7.8336844   | 8.018545    | 7.8255277   | 7.9527397   | 7.715154    | 8.104374    | 7.710337    |
| "Uba52"   | 13.941718   | 13.917686   | 13.81765    | 13.69889    | 13.836855   | 13.752609   | 14.02069    | 13.732641   |
| "Uba7"    | 2.906374533 | 3.039691967 | 3.1918123   | 3.408283133 | 3.127561333 | 3.379152033 | 3.6268467   | 3.656953067 |
| "Ubac1"   | 11.728187   | 11.735507   | 12.205983   | 12.188729   | 11.603543   | 11.173546   | 12.196281   | 12.044373   |
| "Ubac2"   | 6.98803885  | 7.6087485   | 7.31644935  | 7.5776455   | 7.22194815  | 7.37490415  | 7.0800635   | 7.3539355   |
| "UbaP1"   | 7.6423565   | 7.4237065   | 7.478743    | 7.525272    | 7.7735226   | 8.3394405   | 7.6694727   | 7.610653    |
| "UbaP2"   | 8.2340765   | 8.992043    | 8.821608    | 9.114651    | 8.454916    | 8.503495    | 8.552967    | 8.812603    |
| "UbaP2l"  | 4.88391076  | 5.31630464  | 4.86978786  | 4.88596726  | 4.94305178  | 5.09607436  | 4.7870189   | 4.81339636  |
| "Ubc"     | 11.75665112 | 12.37178794 | 11.2052447  | 11.25874582 | 11.78796332 | 12.16582348 | 10.94604592 | 11.39809852 |
| "Ubd"     | 2.634016    | 2.681851    | 2.6546886   | 2.7166839   | 2.654592    | 4.5979      | 3.0128863   | 2.727761    |
| "Ube1y1l" | 2.344571    | 2.3924007   | 2.3643775   | 2.4416342   | 2.3682923   | 2.3516154   | 2.3654413   | 2.413539    |
| "Ube2a"   | 8.97787025  | 9.2429935   | 9.294394    | 9.396383    | 9.060916    | 9.1286655   | 9.485121    | 9.309914    |
| "Ube2b"   | 12.4179355  | 13.09479    | 13.019044   | 13.130665   | 12.993768   | 12.85427    | 12.5265395  | 13.111816   |
| "Ube2c"   | 3.0250096   | 2.4276133   | 3.0799153   | 2.3914022   | 2.6095479   | 4.4239845   | 2.6299202   | 2.3857706   |
| "Ube2d1"  | 8.17724     | 9.183161    | 9.345505    | 9.565118    | 8.826584    | 8.112323    | 8.954976    | 9.16027     |
| "Ube2d2a" | 8.177830975 | 8.38800675  | 8.692746875 | 8.898594425 | 8.17150125  | 8.3155849   | 8.7928611   | 8.845651    |
| "Ube2d2b" | 2.698423    | 2.8250701   | 2.7583528   | 2.8961082   | 2.7603812   | 2.6854675   | 2.7397616   | 2.8634489   |
| "Ube2d3"  | 10.22124051 | 10.63276014 | 10.53151721 | 10.64922957 | 10.22567229 | 10.35680343 | 10.70802343 | 10.55504586 |
| "Ube2e2"  | 5.1935587   | 5.6761065   | 5.97575     | 5.9642944   | 6.0816946   | 5.3309774   | 5.6661644   | 5.51817     |
| "Ube2e3"  | 5.9732124   | 6.40182965  | 6.9749935   | 7.099552    | 6.4043819   | 5.9787981   | 6.6984821   | 6.805172    |
| "Ube2f"   | 9.111728075 | 9.710006    | 9.1136298   | 9.36087925  | 9.35363425  | 9.78484425  | 9.32472175  | 9.26816425  |
| "Ube2g1"  | 11.611564   | 12.514158   | 11.548208   | 11.657423   | 12.264836   | 12.646892   | 11.194039   | 11.604507   |
| "Ube2g2"  | 7.1669418   | 7.4855107   | 6.819473    | 6.9262373   | 7.0936035   | 7.27796825  | 6.6097833   | 6.80404975  |
| "Ube2h"   | 5.4886227   | 5.41147765  | 5.36067325  | 5.4427388   | 5.60987715  | 5.5768664   | 5.32861125  | 5.3329743   |
| "Ube2i"   | 4.4286987   | 5.068896367 | 4.854588133 | 5.055593867 | 4.720500233 | 4.8642311   | 4.719456267 | 5.041207667 |
| "Ube2j1"  | 8.15859585  | 8.7438975   | 7.5165155   | 7.5245855   | 8.13406485  | 8.17035675  | 8.39507375  | 7.4748812   |
| "Ube2j2"  | 9.424497    | 9.757441    | 9.245852    | 9.356578    | 9.186122    | 9.41047     | 9.333413    | 9.3753      |
| "Ube2k"   | 6.90093325  | 7.23292625  | 6.9429595   | 7.1273414   | 6.8003345   | 7.316498    | 7.0281648   | 7.23022995  |
| "Ube2l6"  | 3.1535544   | 3.1399083   | 3.1499255   | 3.1811452   | 3.1353042   | 3.0950198   | 3.150446    | 3.205073    |
| "Ube2m"   | 6.873469    | 6.7091565   | 6.761027    | 6.808383    | 6.7476993   | 6.395548    | 7.3960857   | 6.8305893   |
| "Ube2o"   | 4.82768     | 5.0074754   | 4.694335    | 4.6380258   | 5.155644    | 5.551469    | 4.2451916   | 4.8485017   |
| "Ube2r2"  | 10.124062   | 10.3581915  | 11.109534   | 11.3822365  | 10.392312   | 10.135993   | 10.747766   | 11.13994    |
| "Ube2s"   | 6.2377192   | 6.33689835  | 6.38233235  | 6.48179205  | 6.3208777   | 6.38021925  | 6.52731965  | 6.4768822   |
| "Ube2t"   | 6.5235248   | 6.0117903   | 6.091592    | 6.58264     | 6.488742    | 5.5507927   | 6.4619927   | 6.7991104   |
| "Ube2v1"  | 7.1931944   | 7.4522114   | 7.358119    | 7.828188    | 7.0998526   | 6.975434    | 7.767259    | 7.4817133   |
| "Ube2v2"  | 6.340415    | 6.5260666   | 6.3686109   | 6.52914285  | 6.4817987   | 6.18063805  | 6.42812135  | 6.5261293   |
| "Ube2w"   | 5.0929052   | 5.0767103   | 5.2140855   | 5.20067     | 5.28053625  | 5.2038629   | 5.29773905  | 5.2273175   |
| "Ube2z"   | 7.6774883   | 7.7223363   | 7.515772    | 7.593298    | 7.748389    | 8.092839    | 7.6783924   | 7.518288    |
| "Ube3a"   | 5.891896975 | 6.317137675 | 6.167980425 | 6.574153525 | 6.249549675 | 6.11423545  | 6.153058175 | 6.57701365  |
| "Ube3b"   | 8.308054    | 8.978373    | 8.723167    | 8.819229    | 8.500322    | 8.418884    | 8.24989     | 8.763328    |
| "Ube3c"   | 6.0152125   | 6.01385715  | 6.39684965  | 6.66165565  | 6.16512475  | 6.35723225  | 6.2576968   | 6.52916505  |
| "Ube4a"   | 5.863881    | 7.7110725   | 4.13036245  | 4.374867    | 6.6596237   | 7.3086476   | 4.1847824   | 4.18642535  |
| "Ube4b"   | 6.52731765  | 7.27224615  | 6.4969106   | 6.23330435  | 7.21265665  | 7.38940825  | 6.53950405  | 6.4424595   |
| "Ubf1"    | 7.1573898   | 7.81650325  | 7.13486005  | 6.70792615  | 7.486096    | 8.41601225  | 7.5195183   | 6.79769685  |
| "Ubiad1"  | 5.123133    | 4.6871185   | 5.797143    | 5.633095    | 5.4000797   | 4.83855     | 5.399908    | 5.5808363   |
| "Ubl3"    | 10.7812805  | 11.068083   | 10.881624   | 10.934483   | 10.872652   | 10.842068   | 10.837524   | 10.887344   |
| "Ubl4"    | 8.4925852   | 8.34212425  | 8.5460693   | 8.519029    | 8.506411    | 8.1615587   | 9.177433    | 8.66679675  |
| "Ubl4b"   | 2.3081722   | 2.3831933   | 2.3111365   | 2.3916864   | 2.3241146   | 2.3058743   | 2.3236988   | 2.3983407   |
| "Ubl5"    | 7.2363763   | 7.286421    | 7.298308    | 7.3436007   | 7.251132    | 7.173155    | 7.4854274   | 7.337171    |
| "Ubl7"    | 6.730829    | 7.6513114   | 8.040728    | 8.968654    | 7.2085714   | 7.6099057   | 7.3169627   | 8.156357    |
| "Ublcp1"  | 6.8808898   | 7.076106825 | 6.90935855  | 7.419574625 | 7.0355533   | 6.873536425 | 6.95386175  | 7.31454595  |
| "Ubn1"    | 5.7366385   | 6.3062634   | 5.7872734   | 5.8627825   | 5.806378    | 6.22437     | 5.789698    | 5.8648205   |
| "Ubox5"   | 4.1055593   | 3.9030564   | 3.64584     | 3.6928542   | 3.6384585   | 3.62796     | 3.3231928   | 3.7622695   |
| "Ubp1"    | 7.191752    | 6.861857    | 6.82568585  | 6.9227025   | 6.93911     | 7.06947425  | 6.89884215  | 7.0038068   |
| "Ubqln1"  | 8.66964515  | 8.8485713   | 8.0856915   | 8.4476755   | 8.8141838   | 9.23436715  | 8.56129475  | 8.3611809   |
| "Ubqln2"  | 8.953444    | 9.286735    | 9.123371    | 9.31733     | 9.494578    | 9.44511     | 8.975049    | 9.479351    |
| "Ubqln4"  | 5.43951955  | 5.8219984   | 5.6349269   | 6.0409195   | 5.4491842   | 5.4494419   | 5.7031347   | 5.8554012   |
| "Ubr1"    | 6.5013645   | 7.340094    | 6.7546807   | 6.7447045   | 6.95809975  | 6.709903    | 6.62957185  | 6.88043905  |
| "Ubr2"    | 6.967166    | 7.4070625   | 5.7677355   | 5.9182736   | 7.2393236   | 7.472378    | 6.4475183   | 5.8492002   |
| "Ubr3"    | 10.375529   | 11.476091   | 11.372843   | 11.9447775  | 11.224228   | 10.953806   | 11.080136   | 11.984193   |
| "Ubr4"    | 8.389203    | 9.539333    | 8.332296    | 8.4079275   | 8.789069    | 9.14454     | 8.368296    | 8.248659    |
| "Ubr5"    | 9.227084    | 9.345414    | 9.561703    | 9.64181     | 9.601109    | 9.610949    | 9.678034    | 9.547108    |
| "Ubr7"    | 4.61404455  | 4.59710495  | 4.4570578   | 4.543438    | 4.72894455  | 4.81419375  | 4.59114785  | 4.6182396   |
| "Ubt1"    | 2.7278337   | 2.7649214   | 2.7853415   | 2.8378701   | 2.7587245   | 2.9701238   | 3.1432528   | 2.8295033   |
| "Ubt1"    | 6.14454165  | 7.12737485  | 6.080126    | 6.11679175  | 6.60126035  | 6.806627    | 5.720867    | 6.2881384   |
| "Ubxn1"   | 11.143199   | 10.903541   | 11.11633    | 11.382193   | 10.703622   | 10.773159   | 11.480224   | 11.105353   |
| "Ubxn10"  | 2.5311308   | 2.582543467 | 2.559436533 | 2.651826067 | 2.565207533 | 2.507513833 | 2.562680833 | 2.656245833 |
| "Ubxn2a"  | 11.031365   | 11.725209   | 11.6689235  | 11.8457885  | 11.265064   | 11.045556   | 11.4159825  | 11.798802   |
| "Ubxn2b"  | 3.5080113   | 3.5797787   | 3.5526438   | 3.6101058   | 3.5575392   | 3.6738002   | 3.5307655   | 3.6498413   |

|             |             |             |             |             |             |             |             |             |
|-------------|-------------|-------------|-------------|-------------|-------------|-------------|-------------|-------------|
| "Ubxn4"     | 9.985657667 | 10.44516733 | 9.478085    | 9.637567333 | 10.02371767 | 10.88741067 | 9.939818333 | 9.631785333 |
| "Ubxn6"     | 8.771731    | 9.026023    | 8.607658    | 8.86008     | 8.400015    | 8.488133    | 9.09105     | 8.737538    |
| "Ubxn8"     | 3.5993001   | 2.6881845   | 3.02859     | 3.4761014   | 4.1604834   | 3.9083161   | 4.166253    | 3.3879364   |
| "Uchl1"     | 2.3067036   | 2.2897859   | 2.516153    | 2.410071    | 2.262189    | 2.3474946   | 2.2622063   | 2.3859975   |
| "Uchl3"     | 9.142794    | 9.62407     | 9.567352    | 9.490447    | 9.400633    | 8.954928    | 9.740608    | 9.465943    |
| "Uchl4"     | 2.7857604   | 3.0698504   | 2.8994138   | 3.0915322   | 2.9067175   | 2.8009293   | 2.8989275   | 2.9874527   |
| "Uchl5"     | 7.0502875   | 6.9087502   | 7.20207815  | 7.37739675  | 7.0822345   | 6.90386415  | 7.41725465  | 7.5299757   |
| "Uck1"      | 6.1609883   | 5.903891    | 6.2957006   | 5.643068    | 7.0837603   | 7.240396    | 7.0601673   | 5.977646    |
| "Uck2"      | 4.8381441   | 4.6597786   | 4.2843257   | 4.72360195  | 4.4866297   | 4.6650033   | 4.84355535  | 4.28208495  |
| "Uckl1"     | 6.431033    | 6.042656    | 6.9430323   | 6.710817    | 6.755836    | 6.4594054   | 7.142585    | 7.034034    |
| "Ucn2"      | 2.2804694   | 2.386833    | 2.2994163   | 2.379488    | 2.3184505   | 2.2728274   | 2.307393    | 2.3910544   |
| "Ucp1"      | 2.1981971   | 2.2814198   | 2.2567315   | 2.324905    | 2.9863536   | 2.2340326   | 2.257947    | 2.3264775   |
| "Ucp2"      | 2.38446     | 2.3916905   | 2.3450563   | 2.3974035   | 2.770528    | 3.653716    | 2.3762233   | 2.3884509   |
| "Ucp3"      | 7.16868565  | 8.98677325  | 7.2228485   | 7.6913673   | 8.65147235  | 8.7102035   | 6.29688835  | 8.1322215   |
| "Uevld"     | 4.3828826   | 4.3162985   | 4.7081566   | 4.750695    | 4.4156923   | 3.9080653   | 4.870677    | 4.9360323   |
| "Ufc1"      | 10.286852   | 10.469781   | 10.667892   | 10.850381   | 10.179666   | 10.117818   | 10.435142   | 10.568693   |
| "Ufd1l"     | 8.11467675  | 8.7044875   | 7.9340485   | 8.2018125   | 8.2242946   | 8.6778125   | 8.0751582   | 8.0732775   |
| "Ufm1"      | 5.07496     | 5.2779481   | 5.03939975  | 5.28305235  | 5.125964125 | 5.076641875 | 5.081871175 | 5.2110722   |
| "Ufsp1"     | 6.0760756   | 6.87819     | 7.4452357   | 7.6626225   | 6.420834    | 4.9115057   | 6.8544245   | 7.2574778   |
| "Ufsp2"     | 8.544139    | 8.774099    | 9.143939    | 9.172084    | 8.685203    | 8.6726055   | 8.783731    | 9.02824     |
| "Ugcg"      | 3.641975033 | 3.549942433 | 3.434789967 | 3.668843467 | 3.5908231   | 3.888364533 | 4.053793667 | 3.598351433 |
| "Ugdh"      | 7.887302    | 6.327628    | 8.299848    | 7.3185453   | 7.742526    | 8.25068     | 7.8095484   | 7.5294456   |
| "Uggt1"     | 7.097435    | 7.852685    | 7.0786967   | 6.8290405   | 7.399361    | 7.5679893   | 6.6737285   | 7.1370907   |
| "Uggt2"     | 3.8817546   | 4.0346327   | 4.0260534   | 4.3496246   | 4.048659    | 3.8703902   | 4.031685    | 4.1152124   |
| "Ugp2"      | 12.452441   | 12.5234632  | 12.3548624  | 12.6757048  | 12.4571102  | 12.1138783  | 12.1273733  | 12.6127118  |
| "Ugt2a1"    | 2.449789    | 2.596304    | 2.4961138   | 2.6231964   | 2.5044966   | 2.4556823   | 2.496831    | 2.5774817   |
| "Ugt2a3"    | 8.525341    | 2.1471477   | 2.1232743   | 2.1750097   | 2.1203103   | 2.0470583   | 2.118416    | 2.1964445   |
| "Ugt2b1"    | 8.442541    | 2.0167828   | 2.0107903   | 2.06594     | 2.0057652   | 1.9767605   | 1.9903257   | 2.0598571   |
| "Ugt2b34"   | 7.7367985   | 2.40462985  | 2.3718966   | 2.4610473   | 2.3696425   | 2.3150717   | 2.36247695  | 2.4583459   |
| "Ugt2b37"   | 2.6859696   | 2.7482524   | 2.6863704   | 2.8156803   | 2.6913376   | 2.639079    | 2.6856623   | 2.7993891   |
| "Ugt2b38"   | 2.4063227   | 2.4650292   | 2.4232473   | 2.4966521   | 2.4233608   | 2.3824103   | 2.4172678   | 2.4931173   |
| "Ugt2b5"    | 9.756211    | 2.7250805   | 2.9820411   | 2.7708163   | 2.693652    | 2.495524    | 2.5812044   | 2.7945974   |
| "Ugt3a1"    | 3.0181411   | 2.38674395  | 2.32178595  | 2.39716355  | 2.30695455  | 2.278941    | 2.3075429   | 2.36570465  |
| "Ugt3a2"    | 9.596507    | 2.1478012   | 2.4265475   | 2.1911619   | 2.135414    | 2.0485454   | 2.0764797   | 2.192998    |
| "Ugt8a"     | 5.948787    | 3.8511322   | 6.6671367   | 5.4213567   | 6.8018503   | 3.3542192   | 6.982453    | 6.7837744   |
| "Uhmk1"     | 7.38359     | 7.4532547   | 7.930292    | 7.8672247   | 7.6246624   | 7.9190636   | 8.02015     | 7.7969627   |
| "Uhrf1"     | 2.8832154   | 2.9837687   | 2.906972    | 2.9672885   | 2.900189    | 2.8769362   | 2.8944137   | 2.9689758   |
| "Uhrf1bp1"  | 7.478822    | 7.2592654   | 7.940695    | 8.468266    | 7.8806276   | 7.20606     | 8.113197    | 7.9743176   |
| "Uhrf1bp1l" | 7.117975367 | 7.085777433 | 5.845606233 | 6.309646467 | 6.892081533 | 7.579127767 | 6.423753333 | 6.274528933 |
| "Uimc1"     | 8.024102    | 8.397721    | 8.122564    | 7.8288      | 8.563482    | 8.739695    | 8.023015    | 8.079706    |
| "Ul1k1"     | 7.6872525   | 8.48059385  | 5.3111199   | 5.7071147   | 7.38240285  | 8.15956125  | 5.59335725  | 5.89336865  |
| "Ul1k2"     | 7.869260333 | 7.987002667 | 8.341434    | 8.519717667 | 8.064777667 | 8.371286    | 8.145329133 | 8.513406333 |
| "Umod"      | 2.6658762   | 2.8916624   | 2.7415848   | 2.8968024   | 2.748927    | 2.6540966   | 2.7419286   | 2.8665445   |
| "Umps"      | 3.2986262   | 3.342283133 | 3.545390433 | 3.3761529   | 3.342926933 | 3.602485967 | 3.436711967 | 3.4609401   |
| "Unc119"    | 5.335655    | 4.1318445   | 5.3670077   | 4.4866467   | 4.9326205   | 4.869489    | 6.45975     | 4.4461713   |
| "Unc119b"   | 5.8711945   | 5.8599591   | 6.19951215  | 5.6570485   | 6.3901135   | 6.402091    | 6.193035    | 5.88807795  |
| "Unc13a"    | 2.2824821   | 2.4451172   | 2.4100307   | 2.5049033   | 2.4116626   | 2.379307    | 2.4089708   | 2.493904    |
| "Unc13b"    | 4.461117    | 4.3337927   | 4.506701    | 4.3914886   | 4.2809763   | 4.3700194   | 4.4614086   | 4.422894    |
| "Unc45a"    | 5.6274457   | 5.8905756   | 5.57492065  | 5.156059    | 5.5012195   | 5.60524835  | 5.4192013   | 5.09466485  |
| "Unc50"     | 6.3897174   | 6.993931067 | 6.41601     | 6.4655128   | 6.628102233 | 6.817010067 | 6.321420967 | 6.360089    |
| "Unc5b"     | 2.6271837   | 2.5223153   | 2.582807    | 2.5770304   | 2.548108    | 2.5312052   | 2.543304    | 2.467192    |
| "Unc93b1"   | 3.8886433   | 3.5165677   | 4.0405006   | 3.7202818   | 4.0169263   | 3.8925667   | 4.5049706   | 3.2475312   |
| "Uncx"      | 2.3369315   | 2.4126663   | 2.35913     | 2.4664462   | 2.3626282   | 2.3324564   | 2.3591897   | 2.4397368   |
| "Ung"       | 5.9968295   | 4.235924    | 5.1430917   | 6.098812    | 6.336108    | 5.223391    | 5.2365355   | 6.5050683   |
| "Unk"       | 3.8166492   | 4.0131006   | 3.7319      | 3.786791    | 3.650495    | 3.7451303   | 3.7818146   | 3.757754    |
| "Uox"       | 10.068674   | 2.1710362   | 2.2320316   | 2.2672849   | 2.177479    | 2.1315584   | 2.1505942   | 2.3085058   |
| "Upb1"      | 9.133528    | 2.6783469   | 2.8548355   | 2.7391942   | 2.7236652   | 2.65217     | 2.5839982   | 2.7277188   |
| "Upf1"      | 3.5958123   | 3.6290183   | 3.5517      | 3.6367316   | 3.385867    | 3.7952745   | 3.2597451   | 3.7821956   |
| "Upf2"      | 7.8929224   | 8.610615    | 8.56507     | 8.842303    | 8.406231    | 8.105264    | 8.474723    | 8.982336    |
| "Upf3b"     | 7.931958    | 8.502405    | 8.015737    | 8.0984335   | 8.146154    | 8.248153    | 8.310844    | 8.24741     |
| "Upk1a"     | 2.4929147   | 2.631807    | 2.5038667   | 2.6235824   | 2.5136545   | 2.4610376   | 2.530697    | 2.5657973   |
| "Upk3b"     | 2.8408465   | 1.9324236   | 1.9166071   | 1.9712086   | 1.9153197   | 1.895263    | 1.9067138   | 1.97296     |
| "Upp1"      | 2.1006737   | 2.156893    | 2.3851368   | 2.3316615   | 2.1282024   | 3.2746923   | 2.1243885   | 2.1871455   |
| "Upp2"      | 8.6444765   | 2.8034914   | 2.7627252   | 2.8455347   | 2.72884585  | 2.6696162   | 2.6981598   | 2.8432518   |
| "Uqcc"      | 7.503597    | 7.5881295   | 7.74461865  | 8.1812735   | 7.5359557   | 7.4281728   | 7.5429643   | 8.284829    |
| "Uqcr11"    | 12.471207   | 12.49248    | 12.823977   | 12.93647    | 12.727263   | 12.434056   | 12.696749   | 12.886401   |
| "Uqcrb"     | 13.5949955  | 13.638136   | 13.832538   | 13.9955965  | 13.8073415  | 13.5227535  | 13.674209   | 13.927156   |
| "Uqcrc1"    | 11.487163   | 11.534618   | 11.908751   | 12.061014   | 12.044994   | 11.649524   | 11.504472   | 11.923042   |
| "Uqcrc2"    | 13.241768   | 13.252248   | 13.538055   | 13.7944345  | 13.73721    | 13.425485   | 13.2889705  | 13.8054055  |
| "Uqcrcfs1"  | 12.722588   | 12.7577305  | 13.031998   | 13.076948   | 13.14343    | 12.9206505  | 12.813184   | 13.06454    |
| "Uqcrrh"    | 12.8744     | 12.807442   | 12.90998    | 12.981562   | 12.981481   | 12.857612   | 12.881264   | 12.924946   |
| "Uqcrrq"    | 5.734547233 | 5.740038367 | 5.75959533  | 5.926031833 | 5.800686333 | 5.6870281   | 5.736592567 | 5.8586158   |
| "Urm1"      | 3.969085867 | 4.138868033 | 4.210924133 | 4.2267413   | 4.118648333 | 4.194892833 | 3.9893945   | 4.055081733 |
| "Uroc1"     | 6.972877    | 2.2481942   | 2.297978    | 2.303933    | 2.694486    | 2.2052717   | 2.2217734   | 2.3015206   |
| "Urod"      | 8.483424    | 8.694245    | 8.854081    | 8.833161    | 8.742878    | 8.275857    | 8.597255    | 8.594225    |
| "Uros"      | 7.310142    | 7.075181    | 7.7867775   | 7.5984473   | 7.404575    | 7.063579    | 7.982227    | 7.5410466   |
| "Use1"      | 10.814744   | 10.4953305  | 10.616767   | 10.436999   | 10.6086655  | 10.288559   | 11.0286615  | 10.4288295  |
| "Usf1"      | 3.73048305  | 3.96953575  | 3.97148105  | 3.96639065  | 3.95290915  | 3.87328335  | 3.88047535  | 3.90273415  |
| "Ushbpl"    | 5.7543583   | 5.8897057   | 6.498543    | 6.572678    | 6.6110873   | 7.19358     | 6.5098624   | 6.925394    |
| "Usmg2"     | 3.2709165   | 3.6334326   | 3.4132767   | 3.6309476   | 3.429994    | 3.342009    | 3.386336    | 3.5498252   |
| "Usmg5"     | 12.328015   | 12.35711    | 12.615042   | 12.763305   | 12.554344   | 12.3734045  | 12.528832   | 12.722659   |

|          |             |             |             |             |             |             |             |             |
|----------|-------------|-------------|-------------|-------------|-------------|-------------|-------------|-------------|
| "Uso1"   | 9.663162    | 9.798933    | 10.215123   | 9.95831     | 9.933158    | 10.077308   | 10.092521   | 10.100888   |
| "Usp1"   | 6.8619816   | 8.0758351   | 5.767517367 | 6.425352367 | 6.597203733 | 7.4653605   | 5.697565233 | 6.2847585   |
| "Usp10"  | 7.6843677   | 7.992157    | 8.242316    | 8.298508    | 7.72517     | 7.650093    | 8.1124735   | 8.013382    |
| "Usp12"  | 2.3971245   | 2.4713156   | 2.434225    | 2.53653     | 2.4385307   | 2.390907    | 2.436464    | 2.5444007   |
| "Usp13"  | 4.147215    | 4.6746645   | 3.564411    | 4.0182705   | 4.299417    | 4.980341    | 3.664901    | 3.8627434   |
| "Usp14"  | 7.4954634   | 8.259370833 | 7.889895533 | 8.144640067 | 7.896392667 | 8.301068    | 7.7107968   | 7.9441674   |
| "Usp15"  | 8.806397    | 8.870118    | 9.0878      | 9.375764    | 8.528388    | 8.372314    | 9.321791    | 9.275983    |
| "Usp16"  | 8.363425    | 9.054491    | 8.657461    | 8.984293    | 8.373488    | 8.376319    | 9.102665    | 8.743525    |
| "Usp18"  | 5.123751    | 3.454466    | 3.9179065   | 3.6653118   | 2.568184    | 5.069536    | 5.163686    | 4.131094    |
| "Usp19"  | 8.20103325  | 8.5678205   | 8.38847135  | 8.35494415  | 8.3145948   | 8.4052633   | 8.168967    | 8.37365055  |
| "Usp2"   | 9.3053915   | 9.09400725  | 10.6396275  | 11.1071075  | 10.610785   | 8.7830132   | 10.67526575 | 10.9754385  |
| "Usp20"  | 4.998251    | 4.798409    | 4.4341736   | 4.3008075   | 4.880754    | 4.538468    | 5.542755    | 4.374656    |
| "Usp21"  | 4.82198     | 4.9570684   | 4.9440656   | 5.041328    | 4.953509    | 5.049077    | 5.026271    | 5.0357695   |
| "Usp24"  | 7.7095567   | 7.6215835   | 7.62323835  | 8.24946135  | 7.77185925  | 7.5582375   | 8.3678963   | 8.25301535  |
| "Usp25"  | 10.044504   | 10.655998   | 10.606389   | 11.335553   | 10.409604   | 10.119938   | 10.488664   | 11.187656   |
| "Usp27x" | 2.4029536   | 2.5299625   | 2.4809606   | 2.5925603   | 2.484977    | 2.4612303   | 2.4791868   | 2.5900605   |
| "Usp29"  | 2.6808627   | 2.9996145   | 2.7499194   | 2.911453    | 2.7634616   | 2.7852597   | 2.749954    | 2.8471563   |
| "Usp3"   | 6.73752115  | 7.89592275  | 5.0742345   | 5.363308    | 7.01614515  | 8.1034485   | 5.49596815  | 5.10059125  |
| "Usp33"  | 7.2113314   | 6.7000012   | 7.081496    | 7.5012536   | 7.480778    | 7.631122    | 7.350985    | 7.411695    |
| "Usp34"  | 7.7454855   | 8.0537563   | 8.2450758   | 8.2430773   | 7.8219338   | 7.9221542   | 8.277446    | 8.1028698   |
| "Usp36"  | 4.72768615  | 5.8674514   | 3.85516485  | 4.39019655  | 4.35175285  | 4.98567055  | 3.7927475   | 4.11468725  |
| "Usp38"  | 6.9156375   | 8.225514    | 7.495373    | 7.6512523   | 7.552076    | 7.516651    | 7.54923     | 7.581497    |
| "Usp39"  | 8.16393325  | 8.894265    | 8.16707435  | 8.25171225  | 8.22289115  | 8.477405    | 8.21542915  | 8.1074287   |
| "Usp4"   | 8.16842     | 8.214059    | 8.284351    | 8.689183    | 8.21984     | 8.309391    | 8.609228    | 8.333315    |
| "Usp42"  | 2.259388    | 2.3717346   | 2.320797    | 2.4433665   | 2.3250942   | 2.264766    | 2.3197043   | 2.4211197   |
| "Usp43"  | 2.48010075  | 2.5927043   | 2.5231302   | 2.62851295  | 2.52981125  | 2.4899489   | 2.49823785  | 2.6074928   |
| "Usp45"  | 6.369202167 | 6.927152567 | 6.497712133 | 6.776246333 | 6.708000733 | 7.454738667 | 6.7348054   | 7.0122189   |
| "Usp47"  | 11.2693515  | 11.47165725 | 11.5239335  | 11.6152     | 11.250888   | 11.113578   | 11.8526395  | 11.59163875 |
| "Usp48"  | 5.5299551   | 5.421551633 | 5.686016933 | 5.567238167 | 5.685845467 | 5.721958067 | 5.8023536   | 5.7044228   |
| "Usp5"   | 5.8549848   | 6.2793245   | 6.575627    | 6.787144    | 5.994242    | 6.3542466   | 6.4064155   | 6.5106783   |
| "Usp53"  | 7.247534    | 7.689814    | 7.103014    | 7.3948426   | 7.47574     | 7.2406507   | 6.625343    | 7.4199824   |
| "Usp7"   | 6.7585225   | 7.302406    | 7.069366    | 7.148498    | 7.0451288   | 7.2701205   | 6.54141     | 7.01165685  |
| "Usp8"   | 7.011897    | 7.287542    | 6.778724    | 6.3227596   | 7.3153434   | 7.313822    | 6.7732706   | 6.8017173   |
| "Usp9x"  | 5.817037529 | 6.193554271 | 6.506849743 | 6.618029157 | 6.246947886 | 6.1244728   | 6.365858829 | 6.753569671 |
| "Usp9y"  | 2.302609    | 2.3845115   | 2.3381085   | 2.4087574   | 2.342042    | 2.3017087   | 2.3365183   | 2.4414833   |
| "Utp11"  | 8.322724    | 8.4908285   | 7.5906325   | 8.012913    | 8.4151555   | 8.9707995   | 7.844213    | 8.0395365   |
| "Utp18"  | 6.517113    | 5.893104    | 5.5624685   | 6.2053757   | 6.0312395   | 6.2458115   | 6.1480303   | 6.0101633   |
| "Utp20"  | 6.908942    | 7.675064    | 6.303243    | 6.711431    | 6.8841324   | 7.2185674   | 6.3524184   | 6.4032035   |
| "Utp3"   | 9.472933    | 9.982115    | 9.175308    | 9.459459    | 9.654243    | 10.018095   | 9.14609     | 9.336693    |
| "Utp6"   | 6.726061667 | 7.1265775   | 7.283271533 | 7.381214333 | 6.6335368   | 6.675268067 | 7.344301667 | 7.462214867 |
| "Utrn"   | 5.5234264   | 5.3510424   | 5.6085553   | 5.722486    | 5.8917441   | 5.74721925  | 5.87201525  | 5.774653    |
| "Uts2r"  | 2.0046442   | 2.033635    | 2.9683304   | 2.1166954   | 2.0169086   | 1.977515    | 2.032032    | 2.1830523   |
| "Uty"    | 2.59739505  | 4.0709353   | 2.776549    | 4.57508475  | 2.76857165  | 4.34832225  | 2.7592236   | 4.76414335  |
| "Uvrag"  | 7.713681    | 7.2236037   | 6.0170326   | 6.5902815   | 7.1236444   | 7.3872366   | 6.488558    | 6.489176    |
| "Uxs1"   | 5.1526785   | 4.6149307   | 5.6444985   | 6.07640565  | 5.1303456   | 5.03634405  | 5.36669445  | 5.76603745  |
| "Uxt"    | 8.932419    | 9.132211    | 8.9479065   | 9.021364    | 8.716126    | 8.485938    | 9.352535    | 8.749878    |
| "Vac14"  | 6.5690894   | 7.0607114   | 6.570293    | 7.280035    | 5.866341    | 5.2610416   | 7.0913157   | 6.1229978   |
| "Vamp1"  | 2.7478528   | 3.8637252   | 3.806055    | 4.7269025   | 3.396558    | 3.3140981   | 3.8696873   | 4.121124    |
| "Vamp2"  | 4.1795344   | 4.02640545  | 4.14999295  | 4.25448795  | 4.23382865  | 4.05661485  | 4.6314127   | 4.29015025  |
| "Vamp3"  | 7.08001116  | 7.03911026  | 7.6932868   | 7.82816372  | 7.3645618   | 7.204071    | 7.71037666  | 7.66735874  |
| "Vamp4"  | 6.633895433 | 6.422689433 | 6.8073432   | 6.6298577   | 6.4968699   | 6.4765479   | 6.650781333 | 6.9943592   |
| "Vamp5"  | 7.04121485  | 7.10732175  | 7.2896923   | 7.3790569   | 7.19373585  | 6.6061415   | 7.4042592   | 7.73257335  |
| "Vamp7"  | 7.59466965  | 7.6141197   | 8.0056795   | 7.9112175   | 7.6897673   | 7.25455885  | 7.72080535  | 8.24472465  |
| "Vamp8"  | 9.879557    | 9.158474    | 9.262695    | 9.550983    | 9.416546    | 9.512732    | 8.852725    | 9.372921    |
| "Vangl1" | 3.7025075   | 3.855652    | 4.2152114   | 3.886164    | 3.7827432   | 3.7379267   | 3.8477256   | 3.7849915   |
| "Vangl2" | 2.2546077   | 2.3201015   | 2.2680879   | 2.472639    | 2.270842    | 2.2474642   | 2.274808    | 2.3596327   |
| "Vapa"   | 8.700185    | 9.0676374   | 8.896952367 | 9.048339167 | 8.773760767 | 8.915741433 | 8.871701767 | 8.995971967 |
| "Vapb"   | 7.4348558   | 7.29482925  | 7.76932575  | 8.0084015   | 7.062181    | 7.1677626   | 7.4762408   | 7.72108985  |
| "Vars"   | 2.9785032   | 2.865312    | 2.828825    | 2.8579345   | 2.828203    | 2.8087385   | 2.9712625   | 2.35308     |
| "Vash2"  | 3.3407135   | 3.0176353   | 3.02083     | 3.3443973   | 3.0164585   | 2.2999794   | 4.614355    | 3.0652313   |
| "Vasn"   | 5.74191665  | 5.75429165  | 7.01400425  | 6.0869833   | 6.1606266   | 6.0330667   | 5.81876415  | 6.210919    |
| "Vasp"   | 6.0606217   | 5.029028    | 7.149337    | 6.987179    | 6.169773    | 6.8850236   | 6.868678    | 6.9056716   |
| "Vat1"   | 2.6581862   | 2.7109605   | 2.94448325  | 2.81479775  | 2.70464345  | 2.6285007   | 2.8887745   | 2.78860545  |
| "Vav1"   | 3.3270285   | 3.7793765   | 3.546775    | 3.6510627   | 3.4634197   | 4.0700197   | 3.5544121   | 3.5906885   |
| "Vav3"   | 3.530648    | 3.65086305  | 3.95024115  | 3.8852622   | 3.74070695  | 3.71068945  | 3.7497445   | 3.8399315   |
| "Vbp1"   | 10.273955   | 10.726164   | 10.8034415  | 10.801977   | 10.514628   | 10.485568   | 10.870656   | 10.963997   |
| "Vcam1"  | 5.637416167 | 3.637050533 | 4.141899167 | 4.0231367   | 4.054017533 | 6.4196481   | 4.462133567 | 4.059079967 |
| "Vcan"   | 4.136005633 | 2.9444119   | 4.922891267 | 3.894803733 | 3.758254467 | 3.7729172   | 4.096255267 | 3.881988667 |
| "Vcl"    | 6.4621745   | 6.57349415  | 6.6482572   | 6.744455    | 6.54620365  | 6.7475205   | 6.67245825  | 6.6102981   |
| "Vcp"    | 9.33008965  | 10.25414565 | 9.47331715  | 9.454481    | 9.8649355   | 10.1640723  | 9.267721    | 9.4596177   |
| "Vdac1"  | 10.56635538 | 10.7852695  | 11.07855906 | 11.291539   | 10.94376366 | 10.69736012 | 10.7535234  | 11.22056706 |
| "Vdac2"  | 12.3118925  | 12.787459   | 12.80841    | 12.789439   | 12.667995   | 12.666096   | 12.513041   | 12.662273   |
| "Vdac3"  | 12.47708    | 13.089141   | 13.264048   | 13.521175   | 13.073721   | 13.0374155  | 12.92912    | 13.330489   |
| "Vdr"    | 2.4181187   | 2.538891    | 2.4688532   | 2.5562155   | 2.4717298   | 2.4051063   | 2.4717298   | 2.5446444   |
| "Vegfa"  | 6.70822385  | 5.63779425  | 6.40999615  | 7.07693775  | 6.43068965  | 6.379614    | 7.0191365   | 6.8816488   |
| "Vegfb"  | 8.98375     | 8.540448    | 9.178117    | 9.387344    | 9.103442    | 8.455922    | 9.490002    | 9.559977    |
| "Vegfc"  | 3.8282764   | 3.630313    | 3.8611379   | 4.534724    | 3.8107471   | 3.744309    | 3.418975    | 5.4848166   |
| "Vgll1"  | 2.3653364   | 2.5352058   | 2.513005    | 2.5883932   | 2.5029452   | 2.4715283   | 2.4461112   | 2.5799506   |
| "Vgll4"  | 7.325537    | 7.2436986   | 7.3813486   | 7.4866724   | 7.395119    | 7.2185693   | 7.6494317   | 7.6748466   |
| "Vil1"   | 2.394336    | 2.494012    | 2.4265432   | 2.5447521   | 2.4194093   | 2.3889012   | 2.4287777   | 2.526921    |
| "Vill"   | 2.438953    | 2.5506015   | 2.4600434   | 2.5250087   | 2.4660563   | 2.4295027   | 2.4593463   | 2.5476186   |

|               |             |             |             |             |             |             |             |             |
|---------------|-------------|-------------|-------------|-------------|-------------|-------------|-------------|-------------|
| "Vim"         | 11.6964505  | 10.613303   | 12.00590167 | 11.32516967 | 12.16774067 | 11.54782667 | 11.926193   | 11.56641533 |
| "Vip"         | 2.429489    | 2.5346177   | 2.476651    | 2.58373     | 2.4803655   | 2.4307454   | 2.4736726   | 2.5609283   |
| "Vipar"       | 6.3667223   | 6.88239025  | 6.05367255  | 6.23195505  | 7.0320232   | 6.8677864   | 6.52426865  | 6.28932385  |
| "Vipr2"       | 2.3332906   | 2.3905258   | 2.3562875   | 2.418899    | 2.358114    | 2.3397255   | 2.3563354   | 2.4344945   |
| "Vit"         | 4.6905794   | 4.6130686   | 5.84728     | 5.1382565   | 4.683461    | 4.8214006   | 2.9128811   | 5.5717444   |
| "Vkorc1"      | 9.0763445   | 6.1956186   | 8.711529    | 7.794437    | 7.696121    | 6.778924    | 7.896413    | 7.787386    |
| "Vldlr"       | 9.123202    | 10.921401   | 8.943238575 | 10.2722375  | 10.1797661  | 10.627233   | 8.7421465   | 9.99259575  |
| "Vma21"       | 8.25742265  | 8.68249175  | 8.7318955   | 9.101846    | 8.29469935  | 7.828636    | 8.51206525  | 8.8644415   |
| "Vmn1r11"     | 2.7985902   | 3.0048928   | 2.88301     | 3.0664046   | 2.8989592   | 2.8140736   | 2.8815336   | 3.0042515   |
| "Vmn1r13"     | 2.63944     | 2.8617365   | 2.699006    | 2.8821335   | 2.706883    | 2.640162    | 2.6970925   | 2.798659    |
| "Vmn1r14"     | 2.6026168   | 2.7447407   | 2.6671038   | 2.8214676   | 2.6794157   | 2.6110697   | 2.668198    | 2.769988    |
| "Vmn1r148"    | 2.070095    | 3.198735    | 2.4400203   | 2.1621838   | 2.118307    | 2.1009705   | 2.1166747   | 2.1632967   |
| "Vmn1r15"     | 2.798705    | 2.9370291   | 2.875533    | 3.0249147   | 2.8896642   | 2.812467    | 2.876762    | 2.972284    |
| "Vmn1r171"    | 2.5455966   | 2.6818142   | 2.598789    | 2.7381003   | 2.6115482   | 2.5448916   | 2.5998662   | 2.7243366   |
| "Vmn1r186"    | 2.881867    | 3.062522    | 2.9546204   | 3.1554239   | 2.969564    | 2.87698     | 2.956693    | 3.097741    |
| "Vmn1r187"    | 2.3240092   | 2.42339     | 2.3604546   | 2.4560714   | 2.3634372   | 2.321876    | 2.3624654   | 2.4486537   |
| "Vmn1r25"     | 2.64833525  | 2.85741555  | 2.75978365  | 2.9030689   | 2.7623315   | 2.6965972   | 2.74960995  | 2.8605727   |
| "Vmn1r29"     | 2.5611153   | 2.6991622   | 2.6062505   | 2.6906087   | 2.6195817   | 2.5576453   | 2.9154284   | 2.6946592   |
| "Vmn1r40"     | 2.4302776   | 2.5373828   | 2.4654994   | 2.5733035   | 2.4698982   | 2.4265244   | 2.468718    | 2.5841503   |
| "Vmn1r41"     | 2.379825    | 2.47433     | 2.4201775   | 2.5375767   | 2.4251056   | 2.3795516   | 2.419082    | 2.5233798   |
| "Vmn1r43"     | 2.6210527   | 2.6625295   | 2.6353848   | 2.7447693   | 2.6339393   | 2.6079795   | 2.6341102   | 2.7089005   |
| "Vmn1r44"     | 3.061826    | 3.9651992   | 3.1603258   | 3.2145863   | 3.1668136   | 3.1423469   | 3.1593926   | 3.2272437   |
| "Vmn1r45"     | 2.5617874   | 2.7312934   | 2.6246562   | 2.7605896   | 2.6327252   | 2.56645     | 2.618559    | 2.7351093   |
| "Vmn1r47"     | 2.46860015  | 2.5765499   | 2.49500275  | 2.61194185  | 2.5026656   | 2.4538693   | 2.49602775  | 2.61016025  |
| "Vmn1r50"     | 2.4612095   | 2.5807943   | 2.5146935   | 2.6371267   | 2.5163262   | 2.4644008   | 2.5086021   | 2.6092143   |
| "Vmn1r51"     | 2.4577332   | 2.6564593   | 2.5136728   | 2.6930912   | 2.516593    | 2.453981    | 2.5082421   | 2.604958    |
| "Vmn1r58"     | 2.4500923   | 2.5649855   | 2.5078962   | 2.6207178   | 2.5074916   | 2.4613733   | 2.5045378   | 2.576249    |
| "Vmn1r65"     | 2.3922331   | 2.5306175   | 2.4678538   | 2.5356827   | 2.4773543   | 2.4537542   | 2.4698913   | 2.5361123   |
| "Vmn2r-ps159" | 2.6625032   | 2.814221    | 2.725813    | 2.884336    | 2.734078    | 2.6681497   | 2.7168262   | 2.8273668   |
| "Vmn2r88"     | 2.5369089   | 2.767071    | 2.595314    | 2.719831    | 2.6050234   | 2.5555544   | 2.5941958   | 2.678578    |
| "Vmp1"        | 8.7044455   | 9.0678058   | 7.95035825  | 8.52305925  | 8.78577965  | 8.79326525  | 7.8715225   | 8.29810385  |
| "Vnn1"        | 5.3223267   | 3.142268    | 2.8724804   | 2.6763787   | 7.085514    | 6.239304    | 2.8521707   | 3.0094268   |
| "Vnn3"        | 7.0312185   | 3.1097608   | 3.1388068   | 3.1662087   | 4.0321045   | 3.110159    | 3.4986176   | 3.1276267   |
| "Vopp1"       | 5.51541575  | 4.1077705   | 5.19086455  | 5.18052135  | 5.22634875  | 5.423338    | 4.978574    | 5.25225545  |
| "Vprbp"       | 5.0015398   | 5.41175375  | 5.0848389   | 5.1630219   | 5.1069015   | 5.2776976   | 5.09594785  | 5.1254567   |
| "Vpreb1"      | 2.8947277   | 3.0950983   | 2.9703715   | 3.0466745   | 2.9706366   | 2.9247773   | 2.9606073   | 3.0399492   |
| "Vps11"       | 5.3251125   | 5.920358167 | 5.1884903   | 5.287516633 | 5.488051    | 5.491847333 | 5.2152693   | 5.2506558   |
| "Vps13c"      | 2.7016578   | 2.8181958   | 2.776917    | 2.8808217   | 2.7822618   | 2.7430267   | 2.775324    | 2.8802414   |
| "Vps16"       | 5.341497    | 5.3562226   | 5.2910843   | 4.8930817   | 5.5322027   | 5.785667    | 5.1975064   | 5.3906074   |
| "Vps18"       | 3.1243321   | 3.3209283   | 3.098722    | 3.17574625  | 3.13913775  | 3.3455621   | 3.1371733   | 3.17597485  |
| "Vps25"       | 4.9320927   | 5.0996943   | 4.638483    | 5.4688997   | 4.9237385   | 4.721595    | 4.657495    | 5.1261086   |
| "Vps26a"      | 8.799871    | 9.195035    | 8.653786    | 8.636475    | 8.952044    | 8.939983    | 8.785692    | 8.759991    |
| "Vps26b"      | 5.48055015  | 5.75502495  | 5.7381038   | 5.9505223   | 5.78174805  | 5.6463868   | 5.8188419   | 5.84789015  |
| "Vps28"       | 10.14351    | 10.240396   | 10.477768   | 10.285405   | 10.159176   | 9.890167    | 10.569      | 10.184703   |
| "Vps29"       | 5.885178725 | 5.8349512   | 6.197463075 | 6.255749725 | 5.9790903   | 5.9000861   | 6.1529365   | 6.291145275 |
| "Vps33b"      | 3.197303    | 3.1998122   | 3.2208815   | 3.2491636   | 3.22176     | 3.3028343   | 3.2175395   | 3.2533467   |
| "Vps35"       | 6.81686075  | 6.9686602   | 6.63000795  | 6.9803574   | 6.8458683   | 6.8797847   | 6.6622477   | 6.984844    |
| "Vps36"       | 5.45687335  | 5.2725862   | 5.4931423   | 5.7477417   | 5.2961498   | 5.29174575  | 5.86271235  | 5.6489093   |
| "Vps37a"      | 7.5552309   | 9.225681    | 8.831369    | 8.77587     | 8.325899    | 9.278288    | 8.0251635   | 8.2784425   |
| "Vps37b"      | 3.733262    | 3.4896939   | 3.4795125   | 3.5824368   | 3.4762049   | 3.4406214   | 3.4784575   | 3.5347557   |
| "Vps37c"      | 8.6286275   | 8.94342275  | 8.589211    | 8.491635    | 8.719912    | 8.46521525  | 8.997649    | 8.362557    |
| "Vps39"       | 4.7616459   | 4.813761    | 4.8205522   | 4.8018142   | 4.9394357   | 4.80010565  | 4.7829494   | 4.795638    |
| "Vps41"       | 6.584790933 | 7.347498333 | 7.011088667 | 7.064266967 | 7.047209433 | 7.117069333 | 6.9740791   | 5.830612233 |
| "Vps45"       | 4.480864    | 4.4638953   | 4.3690786   | 4.5148015   | 4.069287    | 4.404256    | 4.9198475   | 4.723097    |
| "Vps4a"       | 8.790278    | 9.342522    | 8.92306     | 9.152953    | 8.784776    | 8.753208    | 9.250863    | 8.9766035   |
| "Vps4b"       | 9.39716     | 10.005565   | 9.718235    | 9.754217    | 9.885754    | 10.171628   | 9.608804    | 9.793728    |
| "Vps52"       | 2.2584145   | 2.3977664   | 2.3153262   | 2.3394227   | 2.3301406   | 2.265784    | 2.316524    | 2.4454243   |
| "Vps53"       | 4.7503869   | 5.117576633 | 4.9390351   | 5.032301    | 4.835025167 | 4.978365033 | 4.878922133 | 4.914480833 |
| "Vps54"       | 7.9869185   | 8.61756225  | 7.82525445  | 8.2150695   | 8.290399    | 8.5837515   | 8.076362    | 8.25746735  |
| "Vps72"       | 2.609147    | 2.906348    | 2.8827293   | 3.1124005   | 2.8825269   | 3.1852245   | 2.901906    | 2.940916    |
| "Vrk1"        | 5.4021363   | 5.428874    | 5.3893046   | 5.1427884   | 5.597644    | 6.0740504   | 5.387694    | 5.057457    |
| "Vrk2"        | 4.34746695  | 4.680444    | 5.278391    | 5.67970025  | 4.9401419   | 4.75562515  | 5.77051465  | 5.702469    |
| "Vrk3"        | 7.7302275   | 7.4758396   | 7.4232955   | 7.549808    | 7.378864    | 7.742179    | 7.8623424   | 7.514395    |
| "Vsig2"       | 3.6884122   | 3.988451    | 3.44931     | 3.581513    | 3.6518831   | 3.5303047   | 3.3631864   | 3.677532    |
| "Vsig4"       | 9.9658985   | 2.4578395   | 2.5437906   | 2.5411835   | 2.6603608   | 2.74222     | 2.576422    | 2.513531    |
| "Vsn11"       | 2.3850741   | 2.4803817   | 2.4129112   | 2.5077274   | 2.418123    | 2.3812034   | 2.4126992   | 2.5007055   |
| "Vstm2a"      | 2.5334089   | 2.7314277   | 2.6072679   | 2.7251072   | 2.6094804   | 2.548928    | 2.60446     | 2.7073855   |
| "Vstm2b"      | 2.3035827   | 2.4204302   | 2.3628652   | 2.414361    | 2.3598883   | 2.3458397   | 2.3424077   | 2.4272969   |
| "Vsx1"        | 2.486128    | 2.5786276   | 2.5150363   | 2.6347053   | 2.5223947   | 2.4844599   | 2.5333204   | 2.6279263   |
| "Vta1"        | 7.7028933   | 8.109904    | 7.975224    | 7.865624    | 7.8304524   | 7.6869597   | 8.009478    | 7.7100677   |
| "Vti1a"       | 5.713069    | 5.54850835  | 5.41099025  | 5.2755865   | 5.3423485   | 5.2619017   | 5.96288705  | 4.9697441   |
| "Vti1b"       | 9.422497    | 8.881239    | 9.464689    | 9.623321    | 8.847096    | 8.747601    | 9.637609    | 9.462688    |
| "Vtn"         | 9.74907075  | 4.2772193   | 4.87351235  | 4.85028625  | 4.77178625  | 4.1305285   | 4.72888225  | 4.8202446   |
| "Vwa1"        | 4.3644934   | 3.7368102   | 5.2877736   | 5.2164874   | 4.8913236   | 4.1413875   | 5.5612655   | 4.990257    |
| "Vwa5a"       | 6.04998865  | 5.90728895  | 5.8521925   | 5.721459    | 6.263869    | 6.10644685  | 6.19187785  | 5.8091681   |
| "Vwf"         | 8.020717    | 7.6068935   | 7.8108764   | 7.7218337   | 8.058428    | 8.454257    | 7.936039    | 7.844425    |
| "Wac"         | 8.2574175   | 8.5266705   | 8.25405975  | 8.52641875  | 8.4817      | 8.750516    | 8.2719695   | 8.502988    |
| "Wap"         | 2.3950613   | 2.5601254   | 2.4399533   | 2.5077405   | 2.4405525   | 2.4532778   | 2.4286342   | 2.4969923   |
| "Wars"        | 4.3926022   | 4.902785567 | 4.6810564   | 4.711747433 | 4.530882    | 4.7192355   | 4.753807167 | 4.765227033 |
| "Was"         | 2.240105    | 2.1744585   | 2.2233878   | 2.215096    | 2.3580828   | 3.4696393   | 2.1839433   | 2.275929    |
| "Wasf1"       | 2.9272997   | 2.9527602   | 4.3899884   | 3.2479198   | 3.0803251   | 3.1505747   | 2.8414931   | 3.1798742   |

|           |             |             |             |             |             |             |             |             |
|-----------|-------------|-------------|-------------|-------------|-------------|-------------|-------------|-------------|
| "Wasf2"   | 9.207472    | 9.715131    | 9.148341    | 8.837382    | 9.659074    | 10.122643   | 9.199214    | 9.260908    |
| "Wash"    | 4.23642575  | 4.35132325  | 4.1002403   | 4.0009289   | 4.31844075  | 4.12953635  | 4.2538036   | 4.1793561   |
| "Wasl"    | 8.568640333 | 8.640227    | 8.0757908   | 8.515991167 | 8.609530267 | 8.6476953   | 8.062223667 | 8.293576333 |
| "Wbp1"    | 6.8559217   | 6.797077    | 6.55918     | 7.3488126   | 6.6785326   | 6.6281495   | 6.9822183   | 7.1030855   |
| "Wbp11"   | 8.562999    | 9.202062    | 8.063494    | 8.57487     | 8.622323    | 8.601959    | 8.034338    | 8.528904    |
| "Wbp2"    | 6.5229096   | 6.8502483   | 6.593022    | 6.8540616   | 6.7759047   | 6.576173    | 6.82048     | 6.947027    |
| "Wbp4"    | 7.1986153   | 7.7672589   | 7.6005566   | 7.6959048   | 7.64462945  | 7.47961465  | 7.5872645   | 7.8994605   |
| "Wbp5"    | 9.893894    | 8.817347    | 10.533838   | 9.902732    | 9.520234    | 9.503475    | 10.534498   | 9.853338    |
| "Wbscr16" | 6.304439    | 7.592519    | 6.4038234   | 6.7512703   | 6.9494243   | 6.967028    | 6.5369897   | 6.7274275   |
| "Wbscr22" | 7.3923535   | 7.9362483   | 7.451107    | 7.500456    | 7.2929544   | 7.29025     | 7.495685    | 7.4876037   |
| "Wbscr27" | 2.762545    | 2.9456713   | 2.6974576   | 2.7851326   | 2.6990626   | 3.3603315   | 2.6941967   | 2.730671    |
| "Wdfy1"   | 6.22633475  | 6.42394635  | 4.4737262   | 5.64456485  | 6.61720345  | 5.7163325   | 6.3549235   | 5.691335    |
| "Wdfy2"   | 6.817964    | 6.309965    | 6.8231797   | 6.3619504   | 7.3026342   | 6.6440144   | 6.9771705   | 6.395022    |
| "Wdfy3"   | 7.018346    | 6.579694    | 7.1559      | 6.7847595   | 6.75986     | 7.099088    | 6.884493    | 6.911763    |
| "Wdhd1"   | 2.1851208   | 2.1931937   | 2.1895545   | 2.2440026   | 2.1925468   | 2.3328261   | 2.1878326   | 2.2410643   |
| "Wdpcp"   | 3.5025165   | 3.5460742   | 3.5014446   | 3.27296     | 4.0237613   | 3.5040572   | 3.4537427   | 3.9159245   |
| "Wdr1"    | 5.771871867 | 5.4246803   | 5.817059767 | 5.827822767 | 5.6206835   | 5.874806633 | 6.095791833 | 5.720130333 |
| "Wdr12"   | 6.07988955  | 6.3480758   | 6.4903185   | 6.6861137   | 6.2327445   | 5.9891933   | 6.34783015  | 6.67959635  |
| "Wdr13"   | 6.4217257   | 5.860964    | 6.4523396   | 6.539185    | 6.7367935   | 6.7978916   | 6.4252806   | 6.3898735   |
| "Wdr20a"  | 5.1147226   | 5.3240317   | 5.206121433 | 5.186655467 | 5.391807267 | 5.322835267 | 5.384549    | 5.459221533 |
| "Wdr26"   | 8.4611648   | 9.03022832  | 7.91881438  | 8.3178694   | 8.75056508  | 8.9967832   | 8.04427394  | 8.36731     |
| "Wdr33"   | 5.54017038  | 5.97333442  | 5.5725142   | 5.69051028  | 5.66596412  | 5.75231312  | 5.68491936  | 5.71508422  |
| "Wdr36"   | 5.17426325  | 5.5360887   | 5.13271855  | 5.4806434   | 5.38669985  | 5.25490325  | 5.5018662   | 5.43753585  |
| "Wdr4"    | 2.90724815  | 3.49752995  | 2.939482    | 2.99395535  | 2.9558843   | 3.07252755  | 2.81148575  | 3.0502377   |
| "Wdr43"   | 7.5424565   | 8.0859785   | 7.0738947   | 7.38849255  | 7.4864161   | 7.64640375  | 7.08705625  | 7.3278475   |
| "Wdr45"   | 7.8480315   | 7.6919315   | 7.46363875  | 7.4103492   | 7.8541465   | 7.84144465  | 7.8558802   | 7.62666875  |
| "Wdr45l"  | 8.183613    | 8.625466    | 8.166803    | 8.267441    | 8.318847    | 8.559868    | 8.023383    | 8.250895    |
| "Wdr46"   | 4.500005    | 5.0643764   | 4.6670494   | 4.7198496   | 4.690066    | 4.7277555   | 4.64246     | 4.7180095   |
| "Wdr48"   | 4.52522865  | 4.99385975  | 4.73247275  | 4.37903825  | 4.7714865   | 4.96134735  | 4.4770355   | 4.68253545  |
| "Wdr5"    | 5.2952575   | 5.5710184   | 4.78170515  | 4.8635819   | 5.0367216   | 5.29930415  | 4.8259655   | 4.8070595   |
| "Wdr54"   | 2.57731925  | 2.62329895  | 2.6038071   | 2.6865003   | 2.6056143   | 2.6051309   | 2.6919006   | 2.6620021   |
| "Wdr55"   | 3.9111733   | 3.6546729   | 3.526862    | 3.6833897   | 3.637506    | 3.2709439   | 3.9817579   | 3.6832447   |
| "Wdr6"    | 5.7095535   | 4.8827674   | 6.4477728   | 6.05119135  | 6.10602415  | 5.7917018   | 7.0764898   | 6.37080405  |
| "Wdr61"   | 5.8803385   | 5.96950575  | 5.67220025  | 5.70016215  | 5.89433295  | 6.025244875 | 5.642944625 | 5.800611925 |
| "Wdr74"   | 7.1226554   | 7.664567    | 6.639484    | 6.132138    | 7.0415263   | 7.3820863   | 6.712465    | 6.136951    |
| "Wdr75"   | 5.45756625  | 5.7701807   | 5.2602602   | 5.5669236   | 5.512652    | 5.6258577   | 5.3403969   | 5.51889535  |
| "Wdr77"   | 5.854844767 | 6.700578133 | 5.921616833 | 5.98831333  | 5.842944733 | 6.546470667 | 5.818552833 | 6.127952333 |
| "Wdr78"   | 2.3657186   | 2.6487796   | 2.4409769   | 2.534461    | 2.5219793   | 2.4353733   | 2.4585495   | 2.480163    |
| "Wdr8"    | 5.8099284   | 6.1408367   | 5.8919325   | 6.3134303   | 6.1376705   | 6.120937    | 6.330669    | 6.312814    |
| "Wdr81"   | 7.2299027   | 7.319277    | 5.648258    | 5.317252    | 6.397485    | 6.9716887   | 5.8961678   | 5.915368    |
| "Wdr82"   | 8.612848    | 8.631041    | 8.772043    | 8.922577    | 8.778079    | 9.204384    | 8.806535    | 8.933575    |
| "Wdr83"   | 6.0400085   | 5.7375817   | 6.3865886   | 6.610834    | 6.0387335   | 5.540186    | 6.2081013   | 6.1955814   |
| "Wdr85"   | 3.28559545  | 3.6974555   | 3.59952615  | 3.75309225  | 3.9470998   | 3.50224425  | 3.5300889   | 3.6009352   |
| "Wdr90"   | 2.4794576   | 2.4777908   | 2.4907305   | 2.5366943   | 2.4924357   | 2.4719543   | 2.491295    | 2.5262816   |
| "Wdsub1"  | 5.607723    | 6.6193447   | 6.207238    | 6.846029    | 5.9072213   | 5.872106    | 6.3018355   | 6.6281652   |
| "Wdte1"   | 6.0975246   | 6.859348    | 6.4454613   | 6.555216    | 6.318785    | 6.404971    | 6.088622    | 6.449586    |
| "Wee1"    | 3.590307    | 3.46959585  | 3.71402375  | 3.6066082   | 3.7704488   | 3.50090505  | 3.5047107   | 3.59534315  |
| "Wfdc1"   | 7.286507    | 8.185621    | 8.359613    | 8.480413    | 6.9540653   | 6.6318917   | 7.8817964   | 7.822286    |
| "Wfdc2"   | 2.3450098   | 2.389472    | 2.378315    | 2.4835818   | 2.3837452   | 2.3700905   | 2.3666558   | 2.4771261   |
| "Wfdc5"   | 2.518289    | 2.622477    | 2.5732803   | 2.6601768   | 2.5782292   | 2.522081    | 2.573621    | 2.6860855   |
| "Wfikkn1" | 2.4920046   | 2.541316    | 2.4961798   | 2.6310349   | 2.499885    | 2.4549077   | 2.4610214   | 2.5674045   |
| "Wfs1"    | 8.254726    | 6.924204    | 7.242294    | 8.121396    | 8.21657     | 7.69462     | 7.704549    | 8.398178    |
| "Whsc2"   | 6.4774327   | 7.231341    | 7.033019    | 6.8205156   | 7.266265    | 7.4989047   | 6.9612036   | 6.839494    |
| "Wif1"    | 3.6992521   | 3.8643534   | 8.466027    | 6.3828607   | 3.4197614   | 3.3529952   | 3.0251749   | 7.1827583   |
| "Wip1"    | 5.88274145  | 5.54286505  | 6.4633955   | 6.30319265  | 6.2317885   | 6.70533325  | 6.089192    | 6.3821788   |
| "Wipi1"   | 6.59970908  | 7.3565542   | 6.17829418  | 6.4377034   | 6.46066906  | 6.8730797   | 5.99509354  | 6.3818141   |
| "Wipi2"   | 6.06714     | 7.17519235  | 6.53978395  | 6.5333674   | 6.9151515   | 7.8204108   | 6.67723515  | 6.7936078   |
| "Wisp1"   | 2.52389965  | 2.627998    | 4.99000635  | 3.17613745  | 2.5697698   | 2.5332551   | 2.57965135  | 2.9512006   |
| "Wisp2"   | 2.0960827   | 2.1608162   | 2.4620624   | 2.2093616   | 2.1504803   | 2.1268845   | 2.1506386   | 2.2051492   |
| "Wiz"     | 2.548659    | 2.591774    | 2.5666652   | 2.618769    | 2.5664809   | 3.1326873   | 2.5647845   | 2.611522    |
| "Wls"     | 5.274304567 | 5.485620167 | 6.221412533 | 6.501121033 | 5.971939933 | 6.007666433 | 6.0345526   | 6.537442033 |
| "Wnk1"    | 11.0927525  | 10.7986045  | 11.631414   | 11.5907905  | 11.1083795  | 11.1681305  | 11.421029   | 11.474769   |
| "Wnk2"    | 6.81807625  | 8.0234468   | 7.2781333   | 7.54396585  | 7.62285275  | 6.87164     | 7.4256105   | 7.6689505   |
| "Wnt11"   | 4.766814    | 5.463771    | 3.765602    | 4.9085684   | 5.322832    | 5.5844707   | 3.824171    | 4.549925    |
| "Wnt3"    | 3.493649    | 3.821806    | 3.6758094   | 3.8722522   | 3.6856503   | 3.6149755   | 3.6338425   | 3.7551427   |
| "Wnt3a"   | 2.1964657   | 2.4093935   | 2.223064    | 2.3010569   | 2.222117    | 2.1788383   | 2.221708    | 2.303571    |
| "Wnt4"    | 7.3315964   | 7.6359057   | 7.939758    | 7.381809    | 6.1470175   | 6.316521    | 8.176638    | 7.3712254   |
| "Wnt5a"   | 2.91557195  | 3.00996685  | 5.32896085  | 4.6228313   | 4.40280605  | 3.3123315   | 4.3555185   | 5.12323595  |
| "Wnt5b"   | 3.1863532   | 3.31882805  | 3.32208385  | 3.46986865  | 3.50754475  | 3.12041405  | 3.2851118   | 3.3920646   |
| "Wnt6"    | 2.4171886   | 2.5119145   | 2.491234    | 2.5213952   | 2.493725    | 2.4413295   | 2.4705536   | 2.5304391   |
| "Wnt8a"   | 2.5694485   | 2.7729945   | 2.6271358   | 2.7269506   | 2.6267886   | 2.5994804   | 2.6996875   | 2.6996875   |
| "Wrap53"  | 2.5441144   | 2.4327471   | 2.350583    | 2.4725764   | 2.433679    | 2.4194527   | 2.4289289   | 2.47511     |
| "Wrn"     | 2.4878545   | 2.4701726   | 2.499765    | 2.6234841   | 2.5185938   | 2.454772    | 2.4985619   | 2.6577897   |
| "Wrnip1"  | 5.71720085  | 4.63239865  | 4.9393933   | 5.09695335  | 5.06597495  | 5.079064    | 5.27941785  | 5.1998108   |
| "Wsb1"    | 8.597812    | 6.7485023   | 7.01531     | 7.1362586   | 7.126302    | 6.974622    | 6.818936    | 7.378713    |
| "Wsb2"    | 9.3226705   | 9.6234905   | 9.22071325  | 9.6183735   | 9.1214215   | 8.9169548   | 9.4374385   | 9.404422    |
| "Wt1"     | 2.931171    | 2.9833486   | 2.909665    | 3.043079    | 2.926327    | 2.8520138   | 2.9117498   | 3.0052853   |
| "Wtap"    | 8.3033605   | 8.859025    | 8.7261075   | 8.8195605   | 8.5736185   | 8.869491    | 8.5456605   | 8.777509    |
| "Wwc1"    | 2.4743598   | 2.46447535  | 2.4569608   | 2.51270635  | 2.4590056   | 2.4258722   | 2.4516313   | 2.5076402   |
| "Wwc2"    | 4.05625272  | 4.2504763   | 4.2945098   | 4.60245496  | 4.51014012  | 4.33853416  | 4.51456894  | 4.4941917   |
| "Wwox"    | 2.1795306   | 2.2455559   | 2.2402515   | 2.30517     | 2.4095461   | 2.1523662   | 2.2373617   | 2.2850268   |

|           |             |             |             |             |             |             |             |             |
|-----------|-------------|-------------|-------------|-------------|-------------|-------------|-------------|-------------|
| "Wwp1"    | 9.524903667 | 10.29785233 | 10.46771333 | 10.6369165  | 10.04066367 | 10.00747867 | 10.18833667 | 10.563142   |
| "Wwp2"    | 4.47278485  | 4.3605385   | 4.2678878   | 4.16740105  | 4.1577276   | 4.2026239   | 4.5027407   | 4.04365615  |
| "Wwtr1"   | 7.468249433 | 7.2960245   | 7.2880468   | 7.137134    | 7.327641033 | 7.305908433 | 8.087088233 | 7.075027    |
| "X99384"  | 6.350647    | 6.614278    | 6.0697484   | 5.982344    | 6.1425543   | 6.474099    | 6.905375    | 6.4225564   |
| "Xab2"    | 5.308837133 | 6.717757467 | 5.0239773   | 5.054734733 | 5.807557    | 6.314711867 | 5.117638733 | 5.240741733 |
| "Xbp1"    | 8.42397825  | 8.082232    | 8.4645671   | 8.253355075 | 8.62456285  | 8.74166765  | 8.697552875 | 8.492747375 |
| "Xcl1"    | 2.7859957   | 2.9326675   | 2.8273578   | 2.970714    | 2.9785714   | 2.7721853   | 2.824516    | 2.8592076   |
| "Xdh"     | 9.264691    | 9.021631    | 7.9228287   | 8.1939335   | 9.370617    | 10.2153     | 8.983492    | 8.653354    |
| "Xiap"    | 4.424215067 | 4.496746517 | 4.614262517 | 4.727744633 | 4.515700367 | 4.571848467 | 4.520463967 | 4.7173289   |
| "Xirp1"   | 10.047374   | 8.91399     | 7.3105383   | 6.7401867   | 8.283322    | 8.740086    | 8.0640745   | 6.7973304   |
| "Xist"    | 9.6573779   | 2.427091933 | 9.810489667 | 2.382852967 | 9.703164333 | 2.2364244   | 9.765915333 | 2.447169967 |
| "Xk"      | 2.5928464   | 2.6350632   | 2.6072745   | 2.6705499   | 2.704014    | 2.5862198   | 2.609376    | 2.68232     |
| "Xlr3a"   | 5.688417    | 3.046953    | 3.3893814   | 6.2196984   | 3.473411    | 3.3156352   | 3.018105    | 6.318969    |
| "Xlr4a"   | 2.5048625   | 2.2440581   | 2.2312052   | 2.473608    | 2.232591    | 5.4810486   | 2.2287467   | 2.3491497   |
| "Xlr5a"   | 2.8198469   | 3.0735931   | 2.925584    | 3.1252952   | 2.9437716   | 2.8883905   | 2.9240053   | 3.0740726   |
| "Xpa"     | 6.778976    | 7.3258395   | 5.9954348   | 6.0919895   | 6.8816032   | 7.088955    | 6.090628    | 5.8183975   |
| "Xpc"     | 6.063731    | 6.8205485   | 5.8445926   | 5.5896792   | 6.713352    | 6.366244    | 5.5656886   | 6.205673    |
| "Xpnpep1" | 7.8194575   | 7.582673    | 7.6595335   | 7.2952585   | 7.64695     | 7.6381655   | 7.6694427   | 7.359646    |
| "Xpo1"    | 8.0275452   | 7.37615     | 8.05536415  | 8.1958625   | 8.453812    | 7.7340085   | 8.414471    | 8.36204     |
| "Xpo4"    | 2.7968202   | 2.4799225   | 2.3036098   | 2.4673624   | 2.7474597   | 2.3911073   | 2.4081674   | 2.2363422   |
| "Xpo5"    | 3.332909    | 3.5009315   | 3.4537818   | 3.5080101   | 4.025955    | 3.5697734   | 3.443469    | 3.4678247   |
| "Xpo6"    | 6.987658    | 6.8747263   | 6.9077463   | 6.8295155   | 6.934162    | 6.895939    | 6.9013004   | 6.603745    |
| "Xpo7"    | 8.33624615  | 8.7894566   | 8.598714    | 8.8026915   | 8.816188    | 8.26035615  | 8.7901465   | 8.7045565   |
| "Xpot"    | 7.49907     | 7.8633738   | 7.9923577   | 8.036292    | 7.412832    | 7.839683    | 7.4584994   | 7.702668    |
| "Xpr1"    | 4.71466306  | 5.04013304  | 5.29631686  | 5.64698486  | 4.7032959   | 4.67920166  | 4.95149776  | 5.2401521   |
| "Xrcc1"   | 6.2781167   | 6.875069    | 6.43002     | 6.4323277   | 6.618398    | 6.6481433   | 6.6221066   | 6.5818667   |
| "Xrcc2"   | 4.662883    | 5.136357    | 5.3080363   | 6.552508    | 4.9177575   | 4.813091    | 4.545155    | 5.366093    |
| "Xrcc4"   | 5.0748288   | 5.7857148   | 5.68628165  | 6.0233502   | 5.6585947   | 5.5654442   | 5.4333365   | 6.05854825  |
| "Xrcc5"   | 6.0552936   | 5.8010693   | 7.290505    | 7.6497307   | 5.934448    | 4.496984    | 7.3396387   | 7.155788    |
| "Xrcc6"   | 6.696308    | 7.005215    | 7.1578965   | 7.359648    | 6.4588923   | 6.422381    | 7.0653477   | 7.282134    |
| "Xrn1"    | 5.4887233   | 5.654936    | 5.552025    | 5.5939384   | 5.7671647   | 5.5593114   | 5.4751806   | 5.587539    |
| "Xrn2"    | 5.7774238   | 5.779851433 | 5.108719433 | 5.1804172   | 5.6028245   | 6.1196942   | 5.286723667 | 5.500791467 |
| "Xyib"    | 4.746434    | 2.8063452   | 2.6713676   | 2.753028    | 2.6876118   | 2.615305    | 2.6513083   | 2.7683284   |
| "Yaf2"    | 7.99898825  | 9.210657    | 8.7066445   | 9.258804    | 8.124856    | 8.8069055   | 8.74601975  | 9.1600735   |
| "Yap1"    | 7.109378    | 7.499227    | 6.341669    | 6.2281993   | 7.127664    | 7.428094    | 6.9924815   | 6.3307195   |
| "Yars"    | 5.1417885   | 5.64496     | 5.386456    | 5.4434376   | 5.2110496   | 5.585192    | 4.9588113   | 5.4073596   |
| "Ybx1"    | 7.8127012   | 8.14404035  | 8.0738053   | 8.1486913   | 7.954006    | 8.00040425  | 8.0567794   | 8.03055285  |
| "Ybx2"    | 2.5493479   | 2.6308815   | 2.5870667   | 2.6451004   | 2.5877733   | 2.5697584   | 2.5801187   | 2.6341786   |
| "Yeats4"  | 7.421826    | 7.017639    | 7.2316594   | 6.9559746   | 7.052194    | 7.428731    | 7.094195    | 7.2018294   |
| "Yes1"    | 3.98865405  | 4.00146075  | 4.13220175  | 4.676074    | 4.0320604   | 4.075293    | 4.1364174   | 4.68634965  |
| "Yif1a"   | 6.779540933 | 6.525881    | 6.9096244   | 6.81713     | 6.7935707   | 6.4989899   | 7.047290933 | 6.661747533 |
| "Yipf1"   | 6.5946436   | 5.3912206   | 5.8848877   | 5.5131598   | 5.759073    | 5.9051495   | 6.3406215   | 5.5477905   |
| "Yipf2"   | 5.78955315  | 6.0152582   | 5.82307235  | 6.0919325   | 5.5029678   | 5.659301    | 6.04074835  | 5.9535295   |
| "Yipf3"   | 7.5705895   | 7.6878166   | 7.56987     | 7.108342    | 7.5556765   | 7.4166837   | 7.672514    | 7.0594044   |
| "Yipf4"   | 5.965652267 | 6.3522282   | 5.8211865   | 6.032162333 | 6.2048741   | 6.0523783   | 5.8898054   | 5.962884333 |
| "Yipf5"   | 7.1486198   | 7.304579    | 7.38977635  | 7.1734302   | 7.15559785  | 7.4304015   | 7.23350865  | 7.13558625  |
| "Yipf7"   | 9.06727     | 9.07501     | 9.956215    | 9.782285    | 9.50526     | 8.809225    | 9.320835    | 9.511736    |
| "Yjefn3"  | 3.6379616   | 3.7337189   | 3.677051    | 3.7266195   | 3.6610339   | 3.6349995   | 3.6760554   | 3.88416     |
| "Ykt6"    | 5.5585866   | 5.52056425  | 5.80732435  | 6.18495465  | 5.3425065   | 5.468311    | 5.8080649   | 5.8983363   |
| "Ylpm1"   | 6.5693054   | 6.883329    | 6.86425     | 6.48337     | 6.8347063   | 7.0229764   | 6.841634    | 6.570704    |
| "Yme11i"  | 6.865202667 | 7.511443767 | 7.339464633 | 7.590182667 | 7.566727    | 7.483391233 | 7.329150667 | 7.747077233 |
| "Ypel1"   | 2.4580668   | 2.53444315  | 2.506696    | 2.5847616   | 2.52135685  | 2.4567149   | 2.50094125  | 2.59684505  |
| "Ypel3"   | 8.06464625  | 9.174915    | 7.912553    | 7.8459496   | 8.873717    | 8.789318    | 8.155996    | 8.149292    |
| "Ypel5"   | 7.51767475  | 7.54311525  | 6.80295225  | 6.64504555  | 7.584909    | 8.09228165  | 6.7831432   | 6.59961755  |
| "Yrdc"    | 6.813003    | 7.332645    | 5.843779    | 6.530047    | 6.2919173   | 6.974807    | 5.6788273   | 6.187552    |
| "Ythdc1"  | 9.10464     | 9.510606    | 8.6825966   | 8.741201    | 9.1914555   | 9.22522475  | 8.681759    | 9.1246155   |
| "Ythdf1"  | 8.6935658   | 9.511219    | 8.634598133 | 8.7877005   | 9.202467833 | 9.259853867 | 8.4574782   | 8.806232667 |
| "Ythdf2"  | 8.0155952   | 8.69879275  | 7.65680025  | 7.85368115  | 8.0940178   | 8.720738    | 7.60306025  | 7.727694    |
| "Ythdf3"  | 8.018756667 | 7.975702667 | 8.088938333 | 8.265804767 | 8.127116533 | 8.194343133 | 8.000603    | 8.232871833 |
| "Ywhab"   | 8.588311333 | 8.353945717 | 8.791775167 | 8.1937935   | 9.226383183 | 9.682978667 | 9.391432333 | 8.537479533 |
| "Ywhae"   | 9.72803975  | 10.09060525 | 10.142341   | 10.40469675 | 9.97857925  | 9.83525075  | 9.885224875 | 10.33122775 |
| "Ywhag"   | 7.661069467 | 7.682182    | 8.0271699   | 8.280035633 | 7.846290767 | 7.615919433 | 8.174422667 | 8.2674104   |
| "Ywhah"   | 8.840907    | 8.456873    | 9.178588    | 8.819671    | 8.743081    | 8.884422    | 9.156625    | 8.653548    |
| "Ywhaq"   | 8.507313729 | 7.597550886 | 8.781220886 | 8.403340171 | 8.663748957 | 8.7563702   | 9.009549557 | 8.575603486 |
| "Ywhaz"   | 7.76758072  | 7.147192    | 7.6542894   | 7.64872492  | 7.49072658  | 7.76942466  | 7.7329251   | 7.4787945   |
| "Yy1"     | 7.958737333 | 7.925060567 | 7.552575333 | 7.468813867 | 7.7423632   | 7.957314    | 7.236896933 | 7.493392933 |
| "Zadh2"   | 8.53654     | 8.96114     | 9.525111    | 9.748661    | 9.066656    | 8.575561    | 9.337161    | 9.163321    |
| "Zap70"   | 3.10413325  | 2.99286505  | 2.9622685   | 2.9560257   | 2.89811895  | 2.91766565  | 2.95309215  | 2.7781839   |
| "Zbed3"   | 3.076272075 | 3.168846525 | 3.128590275 | 3.220417275 | 3.159570725 | 3.111173375 | 3.1551737   | 3.19752565  |
| "Zbed6"   | 9.275375    | 9.946235    | 9.533101    | 9.208808725 | 9.3232805   | 9.73292975  | 9.407918625 | 9.2168399   |
| "Zbp1"    | 3.3028708   | 3.4182844   | 3.359021    | 3.4965997   | 3.3764017   | 3.7859573   | 4.3457503   | 3.3444967   |
| "Zbtb1"   | 5.751734    | 6.004057    | 6.470022    | 7.2969856   | 6.5120473   | 5.6307898   | 7.0304713   | 7.4380045   |
| "Zbtb12"  | 2.5672922   | 2.5617328   | 2.5739787   | 2.6106288   | 2.531989    | 2.5226498   | 2.5559154   | 2.613448    |
| "Zbtb16"  | 8.813525    | 9.0854005   | 7.05322915  | 7.37467925  | 8.2480587   | 8.6878405   | 7.34698155  | 7.85037     |
| "Zbtb17"  | 7.58473     | 7.6717634   | 7.4781904   | 7.7866874   | 7.5351152   | 7.3426037   | 7.744394    | 7.5520477   |
| "Zbtb2"   | 7.819121    | 7.89014     | 5.5864396   | 5.9328337   | 7.451726    | 7.266287    | 5.931413    | 6.0403132   |
| "Zbtb20"  | 9.798355667 | 10.42890267 | 9.651695167 | 9.538196    | 9.934355333 | 10.43483233 | 9.424529667 | 9.580230333 |
| "Zbtb22"  | 7.087685    | 7.5198555   | 7.1292634   | 7.2412386   | 7.111993    | 6.949931    | 7.29492     | 7.029037    |
| "Zbtb25"  | 3.857456    | 3.8286068   | 4.524715    | 4.8773837   | 4.7377324   | 3.987475    | 4.922538    | 4.5145793   |
| "Zbtb32"  | 2.3883045   | 2.8424287   | 2.4274387   | 2.488375    | 2.4284534   | 2.3872979   | 2.4269648   | 2.525814    |
| "Zbtb33"  | 2.6891842   | 2.7913923   | 2.7181869   | 2.8524003   | 2.732306    | 2.7089183   | 2.735404    | 2.8111846   |

|           |             |             |             |             |             |             |             |             |
|-----------|-------------|-------------|-------------|-------------|-------------|-------------|-------------|-------------|
| "Zbtb37"  | 2.3773685   | 2.4814916   | 2.56675     | 2.5343897   | 2.4208689   | 2.3808432   | 2.418624    | 2.5204277   |
| "Zbtb44"  | 5.3470711   | 5.8967744   | 4.9078225   | 5.2063376   | 5.40461     | 5.3112308   | 5.1704932   | 5.24033395  |
| "Zbtb46"  | 3.517985    | 3.5563029   | 3.6416551   | 3.7679242   | 3.5329282   | 3.77180915  | 3.84286155  | 3.715727    |
| "Zbtb48"  | 3.266635    | 3.1278348   | 3.0181324   | 2.9238193   | 2.9541256   | 3.3327901   | 3.00526     | 2.8459623   |
| "Zbtb7a"  | 6.727243    | 6.879573    | 6.681788    | 6.7798944   | 7.2607017   | 7.3892236   | 6.6784983   | 6.516154    |
| "Zbtb7b"  | 3.23515925  | 3.5003265   | 3.83406245  | 3.6151626   | 3.459705    | 3.3239447   | 3.5293182   | 3.5895485   |
| "Zbtb7c"  | 2.2673693   | 2.4099977   | 2.4009354   | 2.5100322   | 2.3979433   | 2.3809304   | 2.3972654   | 2.48669     |
| "Zbtb8a"  | 2.2371092   | 2.3104477   | 2.6478329   | 2.332344    | 2.2682025   | 2.1665437   | 2.2525496   | 2.3588347   |
| "Zc3h10"  | 5.3396354   | 6.8031144   | 5.644467    | 5.679843    | 6.115259    | 6.481243    | 5.5928254   | 5.7064095   |
| "Zc3h12a" | 2.9257712   | 2.9149928   | 2.92234     | 3.0367706   | 2.909726    | 3.2363517   | 2.8643885   | 2.9785306   |
| "Zc3h12c" | 6.292444    | 6.5270905   | 7.3817425   | 7.012393    | 6.6933293   | 6.2577357   | 7.757643    | 7.2030354   |
| "Zc3h14"  | 7.7773082   | 7.9378033   | 8.3466015   | 8.4651915   | 7.81050035  | 7.73722385  | 8.35631525  | 8.4420665   |
| "Zc3h15"  | 9.8345365   | 9.9882375   | 9.758099    | 9.919688    | 9.6115      | 9.806749    | 10.362738   | 9.9024275   |
| "Zc3h18"  | 6.6417775   | 7.6870847   | 6.870527    | 7.300946    | 7.078003    | 7.39192     | 6.946314    | 6.945736    |
| "Zc3h3"   | 3.072738    | 3.2146215   | 3.1308684   | 3.2705112   | 3.4679778   | 3.0894446   | 3.1285257   | 3.044932    |
| "Zc3h7a"  | 3.6271192   | 3.59456815  | 3.84657595  | 3.6437757   | 3.67184195  | 3.91960135  | 3.7786741   | 3.81247505  |
| "Zc3h8"   | 6.0661035   | 6.454953    | 6.503831    | 6.5457172   | 5.937068    | 6.146131    | 6.3092012   | 6.701675    |
| "Zc3hc1"  | 6.3425117   | 6.850001    | 6.955433    | 7.01328     | 6.401542    | 6.066924    | 6.8161583   | 6.9396086   |
| "Zcchc10" | 5.041932    | 5.892242    | 5.3551955   | 6.8954787   | 5.7629467   | 4.8641734   | 5.8725615   | 6.523232    |
| "Zcchc14" | 6.234042667 | 6.7170588   | 5.62726667  | 5.544893833 | 6.424842367 | 6.451530767 | 5.8888      | 5.843665833 |
| "Zcchc17" | 6.978787    | 6.686712    | 7.6215515   | 7.5750046   | 6.882124    | 6.5248947   | 8.122234    | 7.6510425   |
| "Zcchc18" | 2.38919     | 2.6057348   | 2.4207478   | 2.481973    | 2.4280322   | 2.4093335   | 2.4132593   | 2.4905999   |
| "Zcchc3"  | 2.70644595  | 2.8249911   | 2.74498415  | 2.81468085  | 2.8046072   | 2.71051515  | 2.82538785  | 2.8772744   |
| "Zcchc6"  | 6.3109947   | 6.589685    | 6.557802    | 6.3431622   | 6.46598285  | 6.651455    | 6.31936     | 6.33201015  |
| "Zcchc7"  | 8.413581    | 9.083921    | 8.586242    | 8.649289    | 8.312699    | 8.782922    | 8.422042    | 8.606881    |
| "Zcchc8"  | 7.058955    | 7.807444    | 7.019756    | 6.888308    | 7.529679    | 8.0224495   | 7.2923803   | 7.115821    |
| "Zcchc9"  | 5.8606706   | 6.3749075   | 6.032797    | 5.9033146   | 5.835617    | 6.0520363   | 6.043098    | 6.093409    |
| "Zdhhc1"  | 2.6466084   | 2.6824803   | 2.6715918   | 2.8003547   | 2.674582    | 2.6005728   | 2.6683767   | 2.703482    |
| "Zdhhc12" | 2.7504807   | 2.4710612   | 2.5395722   | 2.519114    | 2.5644038   | 2.7452235   | 2.5522828   | 2.5514073   |
| "Zdhhc14" | 6.42985615  | 7.06995395  | 5.20988565  | 4.653381867 | 6.74505705  | 6.42309945  | 5.612635633 | 5.059582    |
| "Zdhhc16" | 7.0531373   | 7.350435    | 7.439536    | 7.749273    | 6.8792152   | 7.0552335   | 7.5899987   | 7.6382594   |
| "Zdhhc2"  | 2.7243961   | 2.790500867 | 2.757161067 | 2.8748842   | 2.916505333 | 2.723948133 | 2.768885567 | 2.832645567 |
| "Zdhhc20" | 4.94244     | 4.432589    | 4.4496207   | 4.88649     | 4.9957514   | 5.1944838   | 4.8409023   | 5.1289845   |
| "Zdhhc3"  | 5.8540909   | 6.2357693   | 6.146103    | 6.26174     | 5.77372005  | 5.75904085  | 6.10215235  | 6.14502075  |
| "Zdhhc4"  | 7.3888354   | 8.424128    | 7.3820176   | 7.8534613   | 7.1799645   | 7.0614576   | 7.330418    | 7.5624247   |
| "Zdhhc5"  | 6.147313    | 6.66676475  | 6.738843    | 7.4114731   | 6.545136    | 6.1037185   | 6.91632155  | 7.0982625   |
| "Zdhhc6"  | 5.460532    | 5.6528775   | 5.534658    | 5.7924336   | 5.40361265  | 5.24606375  | 5.5885971   | 5.74895415  |
| "Zdhhc7"  | 6.7992744   | 7.132664    | 6.561567    | 6.873698    | 6.566041    | 6.8048334   | 6.4961953   | 6.604163    |
| "Zdhhc8"  | 4.122886    | 4.060467    | 4.392212    | 4.1498733   | 4.412901    | 4.2563744   | 4.1748166   | 4.1377716   |
| "Zdhhc9"  | 6.426547    | 5.2907305   | 6.0539517   | 6.0976396   | 5.943181    | 5.9376984   | 6.046242    | 6.0900974   |
| "Zeb1"    | 8.532356    | 9.505308    | 8.967657    | 9.029039    | 9.200435    | 9.196371    | 8.876396    | 9.113483    |
| "Zeb2"    | 8.554094    | 7.5931897   | 9.245407    | 8.871871    | 8.762824    | 8.838279    | 9.56457     | 9.073844    |
| "Zfa"     | 3.0877047   | 3.14911365  | 2.96242     | 3.07735935  | 3.0126044   | 3.0475771   | 2.97958225  | 3.03323225  |
| "Zfand1"  | 5.7068057   | 5.55917     | 5.6557183   | 5.885245    | 5.6027837   | 5.3479404   | 6.28181     | 5.6848197   |
| "Zfand2a" | 5.63587515  | 6.910980175 | 5.264535075 | 5.391657125 | 5.667516875 | 7.5182748   | 5.366211525 | 5.36420755  |
| "Zfand2b" | 6.43105585  | 5.9967472   | 6.3237295   | 6.240864    | 6.1049307   | 6.15330275  | 6.2407255   | 6.20572115  |
| "Zfand3"  | 6.4259445   | 6.7222053   | 6.4562466   | 6.46578404  | 6.40406504  | 6.65768294  | 6.52543122  | 6.5240918   |
| "Zfand5"  | 12.85793567 | 13.405159   | 11.84140367 | 12.017358   | 13.04569    | 13.359289   | 11.36159067 | 12.1692275  |
| "Zfand6"  | 10.662283   | 10.8515     | 11.124953   | 11.04870675 | 10.843125   | 10.697347   | 10.85700325 | 10.97690375 |
| "Zfhx3"   | 6.389004367 | 7.2017142   | 7.482519767 | 7.308647667 | 7.207317533 | 7.2749765   | 6.933659667 | 7.3818505   |
| "Zfhx4"   | 4.5502872   | 4.444942    | 5.640929    | 5.0781364   | 4.97388     | 4.5349207   | 4.9580097   | 5.623797    |
| "Zfmi"    | 7.1249887   | 8.1173035   | 7.2716348   | 7.3431362   | 7.6648527   | 8.1369715   | 7.46074605  | 7.5702922   |
| "Zfp1"    | 6.5692096   | 7.5336566   | 6.931815    | 6.9737687   | 6.792649    | 6.7142396   | 6.495835    | 6.903373    |
| "Zfp101"  | 3.40460005  | 4.18228185  | 4.07370685  | 4.3049697   | 4.0878957   | 4.0738136   | 4.07250255  | 4.3076973   |
| "Zfp106"  | 7.9216936   | 8.264400075 | 8.37644015  | 8.6823875   | 8.38087085  | 7.844420675 | 8.2705055   | 8.807342225 |
| "Zfp108"  | 2.798532    | 2.9750059   | 3.065571    | 3.0661218   | 2.913659    | 2.8139317   | 2.922201    | 3.046775    |
| "Zfp110"  | 7.196886667 | 7.371879    | 6.742752033 | 6.9314355   | 7.423448367 | 7.249926233 | 6.975841133 | 7.2458989   |
| "Zfp111"  | 3.119831    | 3.5090408   | 3.254148    | 3.346103    | 3.286874    | 3.2683687   | 3.2858827   | 3.384609    |
| "Zfp112"  | 5.1768966   | 6.2326655   | 5.341227    | 5.3384027   | 5.3556695   | 6.1999946   | 5.3384876   | 5.4199944   |
| "Zfp113"  | 2.6466258   | 2.7088547   | 2.6052914   | 2.6980455   | 2.653348    | 3.0591462   | 2.6030288   | 2.676159    |
| "Zfp119a" | 4.4085445   | 5.129331    | 4.0198355   | 4.515203    | 4.3371778   | 4.5791335   | 4.2414017   | 4.482829    |
| "Zfp120"  | 5.515653    | 6.5151834   | 4.992288    | 5.76201     | 6.0045652   | 5.6725745   | 5.537934    | 5.8106484   |
| "Zfp125"  | 2.8501244   | 2.9034212   | 3.2775133   | 2.91508     | 2.8754866   | 2.876661    | 2.867701    | 2.9679053   |
| "Zfp131"  | 8.12113     | 8.398384    | 8.847611    | 8.99762     | 8.225086    | 8.475498    | 8.616537    | 8.923328    |
| "Zfp14"   | 3.135269    | 3.2145562   | 3.366643    | 3.9916472   | 3.52833     | 2.9488816   | 3.531658    | 3.6867096   |
| "Zfp142"  | 2.5571089   | 2.71059485  | 2.66990495  | 2.80098245  | 2.6690754   | 2.9801621   | 2.6542707   | 2.84156215  |
| "Zfp143"  | 4.8983226   | 5.7855861   | 4.8775897   | 5.1534081   | 5.3385973   | 5.45479725  | 4.90059785  | 5.2231348   |
| "Zfp146"  | 2.417215    | 2.5239043   | 2.4924786   | 2.5949416   | 2.4796884   | 2.4329824   | 2.4714024   | 2.572226    |
| "Zfp148"  | 6.25439825  | 6.656552125 | 6.59688865  | 6.95444215  | 6.64386085  | 6.48482165  | 6.5554198   | 6.92713805  |
| "Zfp160"  | 4.325468    | 6.067649    | 6.435447    | 7.369013    | 6.4487386   | 5.580878    | 6.29134     | 6.4825263   |
| "Zfp161"  | 5.109244875 | 5.014762675 | 5.82258085  | 6.0228287   | 5.5664703   | 5.180177275 | 5.929768775 | 5.9660285   |
| "Zfp185"  | 2.6390479   | 2.570469    | 5.972374    | 3.4632373   | 3.4744787   | 2.6174552   | 3.841821    | 3.6416535   |
| "Zfp187"  | 8.478852    | 10.1232395  | 8.143473    | 8.199515    | 9.374054    | 9.989892    | 8.385554    | 8.474219    |
| "Zfp189"  | 4.61318     | 4.9861035   | 4.779934    | 5.008319    | 5.5538177   | 5.7235055   | 4.683149    | 4.999738    |
| "Zfp191"  | 5.49306755  | 5.78651365  | 6.2444266   | 6.308247325 | 5.9210317   | 5.749097375 | 5.93358195  | 6.687709525 |
| "Zfp2"    | 3.03697835  | 3.30043675  | 3.15324915  | 3.37830045  | 3.1734435   | 2.90678395  | 3.19094455  | 3.723502    |
| "Zfp202"  | 2.2617197   | 2.338296    | 2.2803447   | 2.3958597   | 2.297598    | 2.2587519   | 2.2361084   | 2.385447    |
| "Zfp207"  | 5.8012495   | 6.499948625 | 5.6226181   | 5.736135625 | 5.77952245  | 6.333966425 | 5.701167025 | 5.795575525 |
| "Zfp212"  | 7.0471287   | 7.545488    | 6.6127844   | 6.7808514   | 7.2456884   | 7.4904094   | 6.7399225   | 7.046432    |
| "Zfp213"  | 2.8968375   | 2.882699    | 3.0155513   | 3.1271124   | 2.9241412   | 2.9852333   | 3.3217413   | 3.22968     |
| "Zfp219"  | 5.156711    | 6.03534     | 5.6154337   | 5.8013477   | 6.0582905   | 6.4181147   | 5.9781437   | 5.654129    |

|           |             |             |             |            |             |             |            |            |
|-----------|-------------|-------------|-------------|------------|-------------|-------------|------------|------------|
| "Zfp235"  | 2.8694963   | 2.8902948   | 3.186674    | 2.9343784  | 2.8879309   | 2.860593    | 2.9220555  | 3.0873153  |
| "Zfp238"  | 10.274652   | 10.98826    | 11.261521   | 11.613658  | 10.636557   | 10.417761   | 10.929844  | 11.588125  |
| "Zfp239"  | 2.4703767   | 2.7352986   | 2.6570804   | 2.579831   | 2.4900565   | 2.4536393   | 2.5021179  | 2.5931969  |
| "Zfp259"  | 6.9952909   | 7.345624    | 5.63534725  | 5.5336702  | 6.2397286   | 6.93990865  | 6.15688235 | 5.8471569  |
| "Zfp26"   | 5.8299403   | 7.166639    | 7.024424    | 7.046106   | 7.041269    | 7.129503    | 7.038456   | 7.165097   |
| "Zfp260"  | 6.03876025  | 5.96062935  | 6.791509475 | 7.1001056  | 6.32696065  | 6.3113779   | 6.73935015 | 7.0650095  |
| "Zfp275"  | 6.283955    | 6.4244227   | 6.724859    | 5.9334226  | 6.7186384   | 6.6357584   | 6.9224696  | 6.115663   |
| "Zfp276"  | 2.9179614   | 2.98835945  | 2.97702505  | 3.039088   | 3.2727728   | 3.18843765  | 2.97229615 | 3.043229   |
| "Zfp277"  | 7.3317175   | 7.0101657   | 7.7139807   | 7.37502    | 7.5800858   | 7.37847     | 7.5502143  | 7.679889   |
| "Zfp28"   | 2.33562     | 2.437839    | 2.366806    | 2.4841526  | 2.375429    | 2.3212378   | 2.3738453  | 2.4823294  |
| "Zfp280c" | 6.049161    | 6.045096    | 6.1667943   | 6.480387   | 6.713893    | 5.848139    | 6.4698668  | 6.1117682  |
| "Zfp280d" | 6.270771    | 6.8320323   | 5.97875735  | 5.7411218  | 6.5034667   | 6.61245975  | 6.2386415  | 6.0738365  |
| "Zfp281"  | 7.42813825  | 7.48336365  | 7.5424323   | 7.73004385 | 7.37341475  | 7.755251    | 7.51717165 | 7.6963439  |
| "Zfp282"  | 3.6999866   | 4.37063335  | 3.6985905   | 3.492183   | 3.73149055  | 4.15381405  | 3.53199915 | 3.5687554  |
| "Zfp292"  | 6.685781375 | 6.79573385  | 6.540833075 | 6.56610165 | 6.84389615  | 6.759590025 | 6.7278563  | 6.65026525 |
| "Zfp295"  | 6.0691175   | 4.9337907   | 4.343602    | 4.5116735  | 4.518899    | 4.7059026   | 4.5171127  | 4.459959   |
| "Zfp296"  | 2.3751712   | 2.3934603   | 2.3879867   | 2.4397707  | 2.3840013   | 2.3660564   | 2.3800144  | 2.4374418  |
| "Zfp30"   | 2.7557454   | 2.879366    | 2.8891716   | 2.9347615  | 2.8539727   | 2.867837    | 2.9174883  | 3.0473151  |
| "Zfp318"  | 4.703518225 | 4.129615875 | 4.061826675 | 4.23179525 | 4.510801425 | 4.639498925 | 4.75922465 | 4.32769315 |
| "Zfp319"  | 2.7615368   | 3.0015836   | 2.9588184   | 2.9841986  | 2.9055543   | 2.8894305   | 2.904824   | 2.9663076  |
| "Zfp322a" | 5.4861937   | 6.5089164   | 6.721064    | 7.042966   | 6.8905845   | 6.6934266   | 7.0659366  | 7.0620375  |
| "Zfp326"  | 7.5931377   | 8.39989     | 7.503904    | 8.377003   | 7.780217    | 7.940137    | 7.2471104  | 8.094125   |
| "Zfp329"  | 4.6943902   | 5.274465    | 5.6873533   | 5.90137415 | 5.6906062   | 5.560488    | 6.508963   | 6.2932574  |
| "Zfp330"  | 8.823116    | 9.416042    | 8.529309    | 8.834814   | 9.055889    | 9.2136      | 8.542058   | 8.7247095  |
| "Zfp334"  | 3.1257168   | 3.3107159   | 3.14018545  | 3.2259264  | 3.3775244   | 2.8985733   | 3.1380384  | 3.2147403  |
| "Zfp33b"  | 2.3571053   | 3.3124006   | 2.3749056   | 2.3972385  | 2.3646977   | 2.338943    | 2.3845515  | 2.393103   |
| "Zfp346"  | 5.1449352   | 4.9220645   | 4.75664375  | 4.92713345 | 4.8583197   | 4.88951715  | 5.07684375 | 4.89719815 |
| "Zfp35"   | 4.98166     | 6.895916    | 5.219767    | 5.358297   | 5.678116    | 6.251376    | 5.1242514  | 5.0019073  |
| "Zfp352"  | 2.4244702   | 2.5977652   | 2.4567003   | 2.5934003  | 2.4573636   | 2.4038365   | 2.4543118  | 2.562545   |
| "Zfp353"  | 3.0380096   | 3.134573    | 3.0972817   | 3.2382593  | 3.0991976   | 3.0106819   | 3.094658   | 3.179648   |
| "Zfp354a" | 3.8828316   | 4.6606255   | 4.2004375   | 4.289812   | 4.340646    | 4.1515055   | 4.20171    | 4.2859073  |
| "Zfp354b" | 3.2313266   | 3.761348    | 4.3080144   | 4.553047   | 4.3804173   | 4.493707    | 4.2908406  | 4.788854   |
| "Zfp358"  | 2.5053978   | 2.71946635  | 2.53886535  | 2.5845927  | 2.59930315  | 2.5158397   | 2.53788485 | 2.5936407  |
| "Zfp36"   | 8.645314    | 7.703409    | 5.6871367   | 6.1496973  | 7.317109    | 7.7578545   | 6.460915   | 6.342003   |
| "Zfp362"  | 4.4630938   | 4.054307    | 4.9256067   | 5.3650823  | 4.7821703   | 4.7189245   | 4.744566   | 5.3492713  |
| "Zfp369"  | 2.3905907   | 2.531776    | 2.432241    | 2.5500698  | 2.4368613   | 2.3917024   | 2.4306617  | 2.5368552  |
| "Zfp361i" | 8.92349235  | 7.541149    | 7.6919935   | 7.65392375 | 8.0563878   | 8.41299075  | 8.4953345  | 8.15932435 |
| "Zfp361z" | 8.890342    | 7.773958    | 9.23095     | 8.40514    | 9.272579    | 9.712701    | 9.1280985  | 8.619757   |
| "Zfp37"   | 3.31233125  | 3.6058798   | 3.4012828   | 3.52250285 | 3.51090905  | 3.48647405  | 3.54372125 | 3.5860829  |
| "Zfp385a" | 2.084782    | 2.1248477   | 2.1189764   | 2.1371639  | 2.150997    | 2.1003542   | 2.4932647  | 2.144843   |
| "Zfp386"  | 7.32631575  | 7.986569    | 7.6717308   | 8.5256323  | 7.7512695   | 7.31579185  | 7.72006085 | 8.238389   |
| "Zfp39"   | 3.1915545   | 3.5116346   | 3.3445544   | 3.5814028  | 3.3842006   | 3.3048458   | 3.3321013  | 3.4952178  |
| "Zfp395"  | 2.3610702   | 2.4243662   | 2.40114     | 2.440782   | 2.40225     | 2.369814    | 2.3965678  | 2.4728756  |
| "Zfp397"  | 3.1810482   | 3.536951    | 3.1981735   | 3.2680335  | 3.183194    | 3.149222    | 3.1958508  | 3.2611625  |
| "Zfp398"  | 2.8272486   | 3.4082713   | 2.8255696   | 3.0257576  | 2.8291435   | 2.7313232   | 2.7892392  | 2.861942   |
| "Zfp40"   | 2.9117024   | 3.0991044   | 3.108521    | 3.2386994  | 3.0973697   | 3.0373764   | 3.028093   | 3.5116677  |
| "Zfp410"  | 8.1315805   | 9.634308    | 6.850382    | 7.0434072  | 8.1144395   | 9.638446    | 6.53538    | 7.2329697  |
| "Zfp42"   | 2.45176     | 2.5623188   | 2.4995084   | 2.5873885  | 2.4993372   | 2.462379    | 2.4985893  | 2.5773437  |
| "Zfp422"  | 6.7937145   | 8.032123    | 6.815338    | 6.542649   | 7.3573117   | 7.8534184   | 6.7642546  | 6.792838   |
| "Zfp423"  | 3.1320946   | 3.5768416   | 3.6057856   | 3.6588926  | 3.5916562   | 3.806078    | 3.5729797  | 3.6442587  |
| "Zfp426"  | 4.493129    | 4.9795594   | 5.569067    | 5.186917   | 5.719702    | 5.3074737   | 5.5538025  | 5.1049404  |
| "Zfp428"  | 2.3721352   | 2.4612095   | 2.4118125   | 2.4629045  | 2.409582    | 2.3684301   | 2.4096997  | 2.62292    |
| "Zfp445"  | 5.7502449   | 6.9654345   | 6.12309065  | 5.8145092  | 5.9976244   | 7.2239595   | 6.0310037  | 6.0360691  |
| "Zfp451"  | 4.0903742   | 4.32448805  | 4.0479651   | 4.4575868  | 4.4069976   | 4.66999045  | 4.270153   | 4.432378   |
| "Zfp455"  | 3.2598896   | 3.6747785   | 3.4571311   | 3.6862228  | 3.4859638   | 3.3548448   | 3.4357135  | 3.664587   |
| "Zfp46"   | 4.8428774   | 5.0323641   | 5.04703915  | 5.0970205  | 5.34349935  | 4.8648186   | 4.961048   | 5.18425215 |
| "Zfp467"  | 2.57942915  | 2.6941485   | 2.6681312   | 2.8159163  | 2.6701516   | 2.6380477   | 2.7509093  | 2.76560865 |
| "Zfp472"  | 3.8737898   | 4.052078    | 3.9372704   | 4.1196833  | 4.032808    | 4.1726356   | 3.961756   | 4.6301203  |
| "Zfp474"  | 3.0706568   | 3.3189611   | 3.2174995   | 3.2523642  | 3.2594779   | 3.2081647   | 3.2213788  | 3.2722335  |
| "Zfp503"  | 6.3174515   | 6.7452795   | 8.02068025  | 7.5546345  | 7.59400715  | 6.7175098   | 7.6207767  | 8.056826   |
| "Zfp51"   | 6.2016497   | 6.7573137   | 6.80759     | 7.633279   | 6.43037     | 5.6387854   | 6.893173   | 7.7723446  |
| "Zfp518b" | 4.3695335   | 4.4469647   | 6.181736    | 5.5725584  | 4.836199    | 4.6076713   | 5.975772   | 5.931528   |
| "Zfp52"   | 5.4219119   | 5.94723425  | 5.0754959   | 5.78535525 | 5.72411975  | 5.4133188   | 5.67185345 | 6.0087495  |
| "Zfp521"  | 6.838721    | 6.485857    | 7.5494356   | 7.1378684  | 6.4791627   | 6.207261    | 6.518751   | 6.600076   |
| "Zfp524"  | 4.085726    | 4.158559    | 4.167377    | 4.1738286  | 4.218592    | 4.1632457   | 4.511067   | 4.1873403  |
| "Zfp53"   | 2.9787147   | 3.352018    | 3.6317859   | 3.89644    | 3.5918474   | 3.9442034   | 3.5767996  | 4.179494   |
| "Zfp532"  | 5.234363    | 5.490857    | 5.87395     | 6.336516   | 5.6577334   | 5.347259    | 5.572479   | 5.9359555  |
| "Zfp54"   | 2.8085988   | 2.9194226   | 2.869062    | 2.9864407  | 2.8265111   | 2.6534576   | 2.9174697  | 3.3219187  |
| "Zfp553"  | 3.96921125  | 4.40805825  | 4.30061435  | 4.6159243  | 4.30191635  | 4.1848452   | 4.31832815 | 4.753534   |
| "Zfp566"  | 2.422158    | 2.8989553   | 2.9193287   | 3.5145388  | 2.8252923   | 2.748038    | 3.7056956  | 3.406517   |
| "Zfp568"  | 5.7444386   | 4.91366275  | 5.25076555  | 5.15165885 | 4.94731675  | 4.8824788   | 5.5393542  | 5.15563235 |
| "Zfp574"  | 5.42024285  | 6.346403    | 5.16615065  | 5.3994396  | 5.62922905  | 6.1680608   | 5.27132985 | 5.3251511  |
| "Zfp59"   | 2.3697526   | 2.4622471   | 2.426655    | 2.5213509  | 2.4278805   | 2.3959923   | 2.4086668  | 2.5093093  |
| "Zfp593"  | 2.5242615   | 2.9022365   | 2.5307012   | 2.5819533  | 2.5341234   | 2.5102386   | 2.5288744  | 2.582354   |
| "Zfp598"  | 7.314172    | 7.401158    | 6.630524    | 6.877393   | 7.1509404   | 7.4156876   | 6.966867   | 6.7380176  |
| "Zfp60"   | 2.6608243   | 2.8209      | 2.7142625   | 2.875753   | 2.7428803   | 2.751944    | 2.7313266  | 2.8367598  |
| "Zfp61"   | 2.7351875   | 3.687132    | 3.2761211   | 2.9095192  | 2.9658113   | 2.919284    | 3.1084146  | 2.973227   |
| "Zfp612"  | 6.107021    | 6.144687    | 5.7480173   | 5.851609   | 5.8048863   | 6.3358617   | 5.705923   | 5.897215   |
| "Zfp617"  | 8.825902    | 9.866492    | 8.401712    | 8.6573105  | 9.338427    | 10.053517   | 8.484328   | 8.95568    |
| "Zfp62"   | 4.71308485  | 5.55395105  | 5.21435835  | 6.0990725  | 5.40175285  | 5.42840335  | 5.3901505  | 6.2914574  |
| "Zfp622"  | 8.940495    | 9.435471    | 8.0367385   | 8.11527435 | 8.7498945   | 9.051033    | 8.1214945  | 8.0577065  |

|             |             |             |             |             |             |             |             |             |
|-------------|-------------|-------------|-------------|-------------|-------------|-------------|-------------|-------------|
| "Zfp623"    | 6.539634    | 7.661557    | 5.5657215   | 5.91168     | 6.117431    | 6.9811306   | 5.8418546   | 5.8067245   |
| "Zfp626"    | 2.710492    | 3.2806163   | 2.8692183   | 2.9461815   | 2.8856876   | 2.9093184   | 2.866851    | 2.94186     |
| "Zfp639"    | 8.127822    | 9.080771    | 8.378107    | 8.546382    | 8.279205    | 8.868923    | 8.4228115   | 8.37005     |
| "Zfp64"     | 3.80267565  | 3.9130049   | 3.77384105  | 3.8694054   | 3.8811131   | 4.48714305  | 3.90905085  | 3.86329795  |
| "Zfp644"    | 4.937722    | 5.451350275 | 5.364638125 | 5.5614976   | 5.4578664   | 5.274093125 | 5.277542325 | 5.577610375 |
| "Zfp651"    | 6.1700525   | 6.8550873   | 6.264973    | 6.909109    | 5.601538    | 5.245327    | 6.279645    | 6.335757    |
| "Zfp654"    | 6.7790284   | 7.0978928   | 7.17449     | 7.71074     | 7.2479806   | 7.0633283   | 7.2358947   | 7.882224    |
| "Zfp672"    | 6.2921915   | 6.643198    | 6.538258    | 6.694755    | 6.666807    | 6.637462    | 6.8377056   | 6.705579    |
| "Zfp68"     | 6.564532    | 7.38681935  | 6.6814385   | 7.02089645  | 6.75506165  | 6.7877565   | 6.85218685  | 7.3305355   |
| "Zfp688"    | 2.6214428   | 2.4652305   | 2.4551725   | 2.5120208   | 2.7430377   | 2.4694128   | 2.4819057   | 2.529076    |
| "Zfp689"    | 2.9510777   | 3.0030856   | 2.9710355   | 3.0610456   | 2.9946036   | 2.9805949   | 2.994393    | 3.0357628   |
| "Zfp7"      | 2.46024     | 2.4949436   | 2.482172    | 2.5537632   | 2.4797168   | 2.4497752   | 2.4797893   | 2.5531793   |
| "Zfp703"    | 7.7442784   | 8.411322    | 6.4171643   | 6.980044    | 7.46085     | 7.6189685   | 7.107413    | 6.9818463   |
| "Zfp704"    | 4.23184465  | 4.3570447   | 4.40298895  | 4.40310455  | 4.5146611   | 4.3147991   | 4.6483087   | 4.29071105  |
| "Zfp709"    | 3.274125    | 3.7478173   | 3.5212362   | 3.7576635   | 3.587707    | 3.4083076   | 3.4390702   | 3.9926589   |
| "Zfp71-rs1" | 6.4265027   | 7.0384655   | 6.2362328   | 7.10628     | 5.8464217   | 6.5872164   | 6.1363955   | 6.9309626   |
| "Zfp740"    | 6.507071    | 7.4834065   | 6.021835    | 6.0637155   | 6.933345    | 7.140316    | 5.983213    | 6.1044793   |
| "Zfp746"    | 6.6096935   | 7.3128467   | 5.58679     | 5.7359586   | 6.0508037   | 6.9734087   | 5.717234    | 5.669208    |
| "Zfp758"    | 5.4334946   | 6.9770966   | 6.8140225   | 7.02353     | 7.2613516   | 7.399703    | 6.8708367   | 7.025212    |
| "Zfp759"    | 2.939011    | 3.0019455   | 3.0654566   | 3.9263067   | 3.1181934   | 2.9734716   | 3.055279    | 3.561571    |
| "Zfp764"    | 3.9020648   | 5.332733    | 5.4610443   | 5.5116954   | 5.456029    | 5.437595    | 5.50854     | 5.470121    |
| "Zfp768"    | 5.0477066   | 5.4205647   | 5.504863    | 5.7218227   | 5.3318996   | 5.3340497   | 5.3578863   | 5.7158294   |
| "Zfp771"    | 5.095703    | 5.0277247   | 4.632021    | 4.738887    | 4.9409537   | 5.7122636   | 4.9330144   | 4.7405934   |
| "Zfp772"    | 2.9557173   | 3.228851    | 3.3097882   | 3.3925974   | 3.1361618   | 3.0411358   | 3.2024968   | 3.4143097   |
| "Zfp777"    | 6.229913    | 7.322356    | 6.6611433   | 6.7144146   | 6.9832325   | 6.709094    | 6.276485    | 6.474994    |
| "Zfp787"    | 5.856428    | 5.8549194   | 5.330159    | 6.495348    | 5.4678593   | 5.5478296   | 5.796377    | 5.7748775   |
| "Zfp790"    | 5.7587662   | 6.95483565  | 5.87668865  | 6.3006867   | 6.6697843   | 7.51278685  | 6.390649    | 6.2958905   |
| "Zfp81"     | 2.7737246   | 2.9642172   | 2.8920956   | 3.0309138   | 2.918448    | 3.0717282   | 2.894013    | 2.9843173   |
| "Zfp810"    | 2.7741847   | 3.3290486   | 3.4513044   | 3.2329102   | 3.5520818   | 3.3118246   | 3.1690466   | 3.5664134   |
| "Zfp82"     | 2.0761282   | 2.130556    | 2.1961963   | 2.2486792   | 2.1932676   | 2.115552    | 3.0394871   | 2.5438378   |
| "Zfp820"    | 2.8790631   | 3.1341052   | 2.9809284   | 3.1723795   | 2.9931269   | 2.8810987   | 2.977737    | 3.1264596   |
| "Zfp821"    | 2.6774902   | 2.6865935   | 2.6792421   | 2.7190633   | 2.676531    | 2.658549    | 2.675366    | 2.728249    |
| "Zfp825"    | 5.01707135  | 5.57197425  | 5.5004288   | 5.45013385  | 5.1848505   | 5.20508085  | 5.3722645   | 5.46582275  |
| "Zfp826"    | 2.5252774   | 2.5970578   | 2.6311562   | 2.6531732   | 2.552359    | 2.5108755   | 2.5201461   | 2.6106458   |
| "Zfp830"    | 5.6412988   | 6.7210743   | 5.651169267 | 6.130319667 | 6.209820867 | 6.598728333 | 5.547367433 | 6.1763885   |
| "Zfp84"     | 2.4803846   | 3.3732993   | 2.7906011   | 2.8483312   | 2.84665335  | 2.9522098   | 2.78936635  | 2.85506305  |
| "Zfp865"    | 2.4498727   | 2.4810278   | 2.465688    | 2.528124    | 2.4647472   | 2.4483538   | 2.4597092   | 2.5207078   |
| "Zfp868"    | 3.4316504   | 3.865424    | 3.463723    | 3.789642    | 3.213052    | 3.7007248   | 3.513163    | 3.6816318   |
| "Zfp869"    | 7.3761086   | 8.3398485   | 6.591201    | 6.867519    | 7.5578423   | 8.013453    | 6.638995    | 6.979652    |
| "Zfp87"     | 2.6490238   | 2.8046448   | 2.7394047   | 2.7741888   | 2.793113    | 2.7808306   | 2.743837    | 2.8475442   |
| "Zfp871"    | 9.043348    | 9.765278    | 9.052019    | 9.059662    | 9.769012    | 10.029931   | 8.987335    | 9.032779    |
| "Zfp90"     | 3.2014089   | 2.7283216   | 3.6149116   | 3.228038    | 3.3394356   | 3.3703642   | 3.3385053   | 3.4263678   |
| "Zfp91"     | 7.535476067 | 7.941852433 | 8.0539789   | 8.2552066   | 7.6855909   | 7.586491467 | 7.882069767 | 8.033610767 |
| "Zfp930"    | 3.9420185   | 4.010585    | 3.9740083   | 4.647692    | 4.036064    | 3.6137567   | 4.41636     | 4.645203    |
| "Zfp931"    | 7.447311    | 7.6977177   | 8.1243305   | 8.933128    | 7.4353642   | 7.3457217   | 8.350387    | 8.586278    |
| "Zfp932"    | 7.8770013   | 9.248379    | 6.9061904   | 6.802736    | 7.6696825   | 8.798467    | 6.4094744   | 7.231986    |
| "Zfp936"    | 2.3298578   | 2.4214957   | 2.3589478   | 2.4681222   | 2.3607864   | 2.327479    | 2.3574903   | 2.4485188   |
| "Zfp937"    | 2.4910886   | 2.5886002   | 2.535769    | 2.6911626   | 2.5432339   | 2.5015264   | 2.5384116   | 2.637627    |
| "Zfp940"    | 2.607114    | 2.7116077   | 2.6815393   | 2.754905    | 2.682258    | 2.662266    | 2.6814337   | 2.7526338   |
| "Zfp942"    | 3.9006361   | 4.32728875  | 4.2702577   | 4.91320035  | 4.2389779   | 4.0058205   | 4.2484214   | 4.7086462   |
| "Zfp943"    | 5.08446575  | 5.83457825  | 5.6825396   | 5.7917729   | 5.52049715  | 5.3937459   | 5.54484215  | 5.8807005   |
| "Zfp944"    | 3.3288089   | 3.50196925  | 3.4489989   | 3.60283385  | 3.46789635  | 3.3050752   | 3.557196    | 3.53840305  |
| "Zfp948"    | 4.2864      | 4.098761    | 4.2268705   | 4.660838    | 4.4477773   | 4.3338056   | 4.5719786   | 4.969326    |
| "Zfp954"    | 3.3767886   | 3.2220042   | 3.6129227   | 3.4447572   | 3.3903465   | 4.221011    | 3.9781349   | 3.4233258   |
| "Zfp955a"   | 6.636235    | 7.054056    | 7.327722    | 7.8287334   | 7.575467    | 6.3731027   | 7.2520084   | 8.006953    |
| "Zfp955b"   | 5.72153185  | 5.482767    | 5.7576108   | 5.980555    | 5.7704072   | 5.419879    | 5.79195215  | 6.182661    |
| "Zfp958"    | 4.805808    | 5.324443    | 3.8815308   | 5.2592325   | 5.2649946   | 4.96526     | 5.162817    | 5.2015734   |
| "Zfp959"    | 4.974784    | 5.6566133   | 4.9413733   | 4.9582663   | 5.141161    | 5.1650333   | 4.813007    | 5.4911475   |
| "Zfp960"    | 6.9841413   | 7.271937    | 7.3828197   | 7.5097694   | 7.417069    | 7.208284    | 7.3303366   | 7.8359666   |
| "Zfp11"     | 4.520872    | 4.3909173   | 4.2562313   | 4.2223663   | 4.2418156   | 4.0420623   | 4.22265     | 4.2718754   |
| "Zfpm1"     | 2.9081125   | 2.8265433   | 2.7789958   | 2.832447    | 2.7886915   | 2.7444801   | 2.7209291   | 2.8326056   |
| "Zfpm2"     | 2.4824585   | 2.5719285   | 2.48338185  | 2.59432375  | 2.5208554   | 2.5316753   | 2.4883887   | 2.58239265  |
| "Zfr"       | 6.6477223   | 6.91188625  | 6.4400545   | 6.7652193   | 7.03104085  | 7.08082535  | 6.74865535  | 6.75883635  |
| "Zfr2"      | 2.4432006   | 2.5618472   | 2.5089421   | 2.627782    | 2.5083244   | 2.4562562   | 2.500105    | 2.6106682   |
| "Zfx"       | 4.960191225 | 5.51872615  | 4.8353511   | 5.007169625 | 5.11197075  | 5.304825125 | 4.94547945  | 4.970151725 |
| "Zfy1"      | 3.0795266   | 3.5763965   | 3.2525856   | 3.4311311   | 3.3838892   | 3.16070795  | 3.1053822   | 3.3609434   |
| "Zfy2"      | 2.6596394   | 2.806384    | 2.7621036   | 2.8768024   | 2.7609499   | 2.6681728   | 2.760521    | 2.8495553   |
| "Zfyve16"   | 4.2529845   | 4.230773    | 5.045032    | 5.23426     | 4.8139935   | 4.6131268   | 4.953987    | 5.4284124   |
| "Zfyve19"   | 6.402347    | 6.577747    | 6.4738135   | 6.456144    | 6.3789315   | 6.6378055   | 7.261915    | 6.555647    |
| "Zfyve21"   | 8.117563    | 8.703632    | 7.7224657   | 7.578888    | 8.26843675  | 8.27192735  | 7.6832593   | 8.039903    |
| "Zfyve26"   | 6.361791    | 7.0226836   | 6.4953775   | 6.207985    | 6.544289    | 7.0101004   | 6.52559     | 6.567547    |
| "Zfyve27"   | 3.79531435  | 4.32677465  | 3.2183542   | 3.4595364   | 4.08946645  | 4.0978741   | 3.30452235  | 3.43984045  |
| "Zg16"      | 3.268956333 | 2.785692833 | 2.695597    | 2.831543867 | 2.705412733 | 2.6458096   | 2.695076767 | 2.890823367 |
| "Zgpat"     | 3.84359065  | 3.04468215  | 3.2884891   | 3.52059975  | 3.55035425  | 3.2931644   | 3.4988226   | 3.50743035  |
| "Zhxl1"     | 6.8950753   | 7.4235992   | 7.129471    | 7.087737    | 7.0559087   | 7.591809    | 7.273466    | 7.085066    |
| "Zic1"      | 3.7895465   | 6.4305453   | 3.0900052   | 3.0520964   | 2.2609727   | 4.027344    | 2.2363605   | 3.068815    |
| "Zic2"      | 2.4112656   | 2.5117283   | 2.4577663   | 2.613597    | 2.458947    | 2.4241178   | 2.4549165   | 2.5478346   |
| "Zic4"      | 2.4900868   | 2.582046    | 2.5210862   | 2.5891492   | 2.5250213   | 2.4985068   | 2.517986    | 2.582016    |
| "Zic5"      | 2.52206385  | 2.65890865  | 2.5706341   | 2.6787864   | 2.57469595  | 2.51004935  | 2.57609655  | 2.6866742   |
| "Zik1"      | 2.7553529   | 2.9599127   | 2.91920315  | 3.2008659   | 2.9260243   | 2.8418123   | 2.92210065  | 3.3457165   |
| "Zim1"      | 2.647078    | 4.241873    | 2.6595178   | 2.6459546   | 3.2047198   | 3.1986146   | 2.5771174   | 2.5244005   |

|            |             |             |             |             |             |             |             |             |
|------------|-------------|-------------|-------------|-------------|-------------|-------------|-------------|-------------|
| "Zkscan1"  | 5.6335673   | 6.9954157   | 6.381645    | 6.199205    | 6.501194    | 7.742674    | 6.2447104   | 6.032903    |
| "Zkscan14" | 4.7126866   | 5.293427667 | 3.9239518   | 4.089750767 | 4.261770767 | 4.484887667 | 3.754442767 | 3.809758667 |
| "Zkscan3"  | 7.3255733   | 8.0965188   | 7.3813218   | 7.2888484   | 7.886517    | 8.612915    | 7.4254863   | 7.520372    |
| "Zkscan5"  | 5.8489103   | 6.6294694   | 5.628696    | 5.9497404   | 5.8299346   | 5.8363047   | 5.8855042   | 6.074672    |
| "Zkscan6"  | 5.1329025   | 5.81735465  | 4.28142325  | 4.26662065  | 4.91899885  | 5.37697035  | 4.226616    | 4.1741013   |
| "Zmat2"    | 5.16182555  | 5.52354085  | 5.38906135  | 5.4660695   | 5.1468406   | 5.22849575  | 5.31609055  | 5.41481815  |
| "Zmat3"    | 5.4229326   | 3.7667854   | 5.6441584   | 5.644203    | 4.682211    | 4.5050135   | 5.8823175   | 5.3048105   |
| "Zmat5"    | 6.0537753   | 6.6467648   | 6.3759766   | 6.4613256   | 6.3758025   | 5.516002    | 6.6996245   | 6.4136686   |
| "Zmiz2"    | 5.347832    | 6.4246855   | 6.195319    | 6.8674445   | 5.4187913   | 6.0569897   | 6.245725    | 6.1597996   |
| "Zmpste24" | 8.60043     | 8.894245    | 9.276268    | 8.886428    | 8.638978    | 8.502951    | 8.991451    | 8.791547    |
| "Zmym1"    | 4.4305277   | 4.6015506   | 4.927118    | 4.676425    | 4.894894    | 5.00853     | 5.026149    | 4.9493356   |
| "Zmym3"    | 3.2198104   | 3.33797695  | 3.36793995  | 3.45583475  | 3.2257094   | 3.2068126   | 3.23041665  | 3.406232    |
| "Zmym4"    | 5.104701    | 6.081962    | 6.6938      | 6.6707993   | 6.193687    | 5.9692473   | 6.4101663   | 6.836418    |
| "Zmym5"    | 8.971123    | 9.910665    | 8.736245    | 9.03648     | 9.686682    | 9.776586    | 8.716316    | 9.089621    |
| "Zmynd10"  | 2.422416    | 2.4748797   | 2.433092    | 2.5512657   | 2.433577    | 2.414065    | 2.4307613   | 2.4843795   |
| "Zmynd11"  | 8.539645833 | 9.089833    | 9.174909    | 9.3224395   | 8.9188025   | 8.879901    | 8.860496933 | 9.304221667 |
| "Zmynd19"  | 6.002628    | 6.35851     | 6.5106874   | 6.661401    | 5.8493767   | 6.170677    | 6.258726    | 6.985415    |
| "Zmynd8"   | 7.654966    | 7.2421594   | 8.201387    | 7.7595987   | 8.202021    | 8.158639    | 8.140958    | 8.016345    |
| "Znfx1"    | 4.948218    | 4.9855704   | 5.035288    | 5.051745    | 5.384529    | 5.147632    | 5.8655906   | 5.203479    |
| "Znhit1"   | 8.20156725  | 8.188066    | 8.466404    | 8.57545     | 8.03943875  | 7.697321    | 8.4885612   | 8.52434165  |
| "Znhit2"   | 6.743859    | 6.8834286   | 5.994424    | 6.3846874   | 6.0396476   | 6.570176    | 6.635056    | 5.9704504   |
| "Znhit3"   | 7.1856117   | 7.7868204   | 7.788045    | 8.200846    | 7.445196    | 7.465251    | 7.813817    | 8.011875    |
| "Znrd1"    | 7.4261675   | 7.652319    | 7.824229    | 7.9115257   | 7.887716    | 7.715745    | 8.214816    | 7.5379543   |
| "Znrd1as"  | 7.9813194   | 8.336302    | 8.096725    | 8.1618395   | 7.8376884   | 6.609222    | 9.120854    | 8.033125    |
| "Znrf1"    | 3.885568867 | 3.985407633 | 4.277513067 | 4.473501433 | 4.093530567 | 4.036364233 | 4.292138133 | 4.1528593   |
| "Znrf2"    | 6.688927725 | 6.8938326   | 6.75588115  | 7.29718425  | 6.87784865  | 6.88585185  | 7.1824055   | 7.23718785  |
| "Zp3r"     | 2.6393044   | 2.7322316   | 2.6580808   | 2.8095078   | 2.664715    | 2.6124015   | 2.6579044   | 2.7812514   |
| "Zpbp"     | 2.3898134   | 2.5222375   | 2.4333124   | 2.5488787   | 2.442902    | 2.382525    | 2.4297514   | 2.5320237   |
| "Zranb1"   | 10.62048983 | 11.71044    | 8.852024667 | 9.127156333 | 11.02450033 | 11.215289   | 8.472113    | 9.370528333 |
| "Zranb2"   | 8.993591    | 9.420675    | 9.191058    | 9.353044    | 9.152151    | 9.582931    | 9.233157    | 9.442972    |
| "Zrsr1"    | 9.002625    | 9.057706    | 7.5753293   | 7.8377194   | 8.869457    | 9.478307    | 7.773516    | 7.803938    |
| "Zrsr2"    | 4.45774515  | 4.80299035  | 4.128015    | 4.30243015  | 4.256435    | 4.5457288   | 4.06656     | 4.19820125  |
| "Zscan12"  | 6.204392    | 7.4949055   | 5.623473    | 6.8140173   | 6.4797826   | 6.5366526   | 6.2611275   | 6.301349    |
| "Zscan21"  | 6.1829162   | 7.032322175 | 5.831171025 | 5.847465625 | 6.469257725 | 6.9179543   | 5.9221915   | 6.0046408   |
| "Zswim1"   | 2.7870286   | 3.0758195   | 3.8623905   | 4.291313    | 3.3292627   | 3.0765707   | 4.0349126   | 4.1088696   |
| "Zswim6"   | 2.3340049   | 2.3037965   | 2.2743495   | 2.3831086   | 2.3282185   | 3.2136912   | 2.2704763   | 2.379675    |
| "Zswim7"   | 8.784218    | 8.839363    | 8.952927    | 9.224066    | 8.555326    | 8.200399    | 9.418882    | 9.0461645   |
| "Zufsp"    | 6.1011286   | 6.405856    | 6.101514    | 6.5795374   | 6.7734404   | 6.87566     | 6.5015364   | 6.8132453   |
| "Zw10"     | 7.3962445   | 7.4163313   | 7.2360806   | 7.1179004   | 7.373355    | 7.5703115   | 6.8679185   | 7.169218    |
| "Zwilch"   | 2.6200404   | 2.6973643   | 2.6515608   | 2.7587547   | 2.651249    | 2.6167264   | 2.6461167   | 2.7471442   |
| "Zwint"    | 7.1378601   | 8.2494079   | 5.486302167 | 5.47562445  | 6.770953967 | 8.67647505  | 5.919362367 | 5.51729195  |
| "Zxdc"     | 5.8858075   | 6.47348465  | 4.8926      | 4.8710482   | 5.8912404   | 6.63331185  | 5.0756456   | 4.9632682   |
| "Zyg11b"   | 7.2004335   | 7.59948375  | 8.723703    | 9.2343575   | 8.12551085  | 7.3808255   | 7.9165415   | 8.940653    |
| "Zyx"      | 5.326941    | 4.480213    | 5.4820733   | 4.450988    | 4.9404783   | 5.292187    | 4.4332695   | 4.441236    |
| "Zzz3"     | 7.3263726   | 6.514858    | 7.4413066   | 6.8965664   | 7.1423273   | 7.4189496   | 7.382333    | 7.1378517   |

| Atg <sup>ΔA</sup> ;Fed<br>vs.<br>Atg7 <sup>ΔAloxP</sup> ;Fed<br>Comparison |                               |                             |                                    |                                  |  | Atg <sup>ΔA</sup> ;Fed<br>vs.<br>Atg7 <sup>ΔAloxP</sup> ;Fed<br>Comparison |                        |                             |              |  |             |              |                               |  |  |                           |               |
|----------------------------------------------------------------------------|-------------------------------|-----------------------------|------------------------------------|----------------------------------|--|----------------------------------------------------------------------------|------------------------|-----------------------------|--------------|--|-------------|--------------|-------------------------------|--|--|---------------------------|---------------|
|                                                                            | Atg <sup>ΔA</sup> ;Fed-Female | Atg <sup>ΔA</sup> ;Fed-Male | Atg7 <sup>ΔAloxP</sup> ;Fed-Female | Atg7 <sup>ΔAloxP</sup> ;Fed-Male |  |                                                                            | Average                | Average                     |              |  |             |              |                               |  |  | Regulation is based on FC | Gene List     |
|                                                                            | Atg <sup>ΔA</sup> ;Fed-Female | Atg <sup>ΔA</sup> ;Fed-Male | Atg7 <sup>ΔAloxP</sup> ;Fed-Female | Atg7 <sup>ΔAloxP</sup> ;Fed-Male |  |                                                                            | Atg <sup>ΔA</sup> ;Fed | Atg7 <sup>ΔAloxP</sup> ;Fed | Diff         |  | Abs(Diff)   | 2*Abs(Diff)  |                               |  |  | Regulation                | Gene List     |
| "Adig"                                                                     | 7.0304937                     | 4.829918                    | 9.330647                           | 6.9110074                        |  | "Adig"                                                                     | 5.93020585             | 8.1208272                   | -2.19062135  |  | 2.19062135  | 4.3812427    | Down in Atg <sup>ΔA</sup> Fed |  |  |                           | Adig          |
| "Adipoq"                                                                   | 11.9323227                    | 8.221262                    | 13.444744                          | 10.922628                        |  | "Adipoq"                                                                   | 10.0722445             | 12.183686                   | -2.1114415   |  | 2.1114415   | 4.22128439   | Down in Atg <sup>ΔA</sup> Fed |  |  |                           | Adipoq        |
| "Adrb3"                                                                    | 2.7599416                     | 2.5253925                   | 6.556928                           | 2.8488517                        |  | "Adrb3"                                                                    | 2.64266705             | 4.70288985                  | -2.0602228   |  | 2.0602228   | 4.170507058  | Down in Atg <sup>ΔA</sup> Fed |  |  |                           | Adrb3         |
| "Ankrd1"                                                                   | 7.683496                      | 6.64677715                  | 9.5681225                          | 7.9896133                        |  | "Ankrd1"                                                                   | 7.165136575            | 8.7788679                   | -1.613731325 |  | 1.613731325 | 3.22746354   | Down in Atg <sup>ΔA</sup> Fed |  |  |                           | Ankrd1        |
| "Apoc1"                                                                    | 7.902136                      | 3.885973                    | 9.694496                           | 6.812614                         |  | "Apoc1"                                                                    | 5.8940545              | 8.253555                    | -2.3595005   |  | 2.3595005   | 4.719262471  | Down in Atg <sup>ΔA</sup> Fed |  |  |                           | Apoc1         |
| "Arxex1"                                                                   | 3.7158492                     | 2.46032145                  | 6.85200285                         | 3.6702198                        |  | "Arxex1"                                                                   | 3.088085325            | 5.261111325                 | -2.173026    |  | 2.173026    | 4.346162921  | Down in Atg <sup>ΔA</sup> Fed |  |  |                           | Arxex1        |
| "Asns"                                                                     | 4.2526447                     | 3.52293705                  | 6.753597                           | 4.23038465                       |  | "Asns"                                                                     | 3.887790875            | 5.491990825                 | -1.60419995  |  | 1.60419995  | 3.204271049  | Down in Atg <sup>ΔA</sup> Fed |  |  |                           | Asns          |
| "Cd68"                                                                     | 5.5345707                     | 3.4808051                   | 8.90399                            | 4.3269444                        |  | "Cd68"                                                                     | 4.4716879              | 6.6154672                   | -2.1437793   |  | 2.1437793   | 4.29181852   | Down in Atg <sup>ΔA</sup> Fed |  |  |                           | Cd68          |
| "Cdo1"                                                                     | 8.0705595                     | 4.7463713                   | 10.476968                          | 7.205731                         |  | "Cdo1"                                                                     | 6.4084654              | 8.8413495                   | -2.4328841   |  | 2.4328841   | 4.869718133  | Down in Atg <sup>ΔA</sup> Fed |  |  |                           | Cdo1          |
| "Ces1f"                                                                    | 3.2900383                     | 2.8506553                   | 8.0791855                          | 4.6041446                        |  | "Ces1f"                                                                    | 3.0703468              | 6.34166505                  | -3.27131825  |  | 3.27131825  | 6.542581021  | Down in Atg <sup>ΔA</sup> Fed |  |  |                           | Ces1f         |
| "Cfd"                                                                      | 12.738193                     | 9.9680605                   | 14.655244                          | 12.3956785                       |  | "Cfd"                                                                      | 11.35312675            | 13.52546125                 | -2.1723345   |  | 2.1723345   | 4.344652187  | Down in Atg <sup>ΔA</sup> Fed |  |  |                           | Cfd           |
| "Cidea"                                                                    | 2.9479907                     | 2.440261                    | 5.809885                           | 3.5826302                        |  | "Cidea"                                                                    | 2.69412585             | 4.6962576                   | -2.00213175  |  | 2.00213175  | 4.005914835  | Down in Atg <sup>ΔA</sup> Fed |  |  |                           | Cidea         |
| "Cidec"                                                                    | 6.9392686                     | 3.751633                    | 9.921686                           | 6.812711                         |  | "Cidec"                                                                    | 5.3454508              | 8.3671985                   | -3.0217477   |  | 3.0217477   | 6.043483635  | Down in Atg <sup>ΔA</sup> Fed |  |  |                           | Cidec         |
| "Cxc9"                                                                     | 3.694266                      | 2.8207848                   | 6.3286953                          | 3.5692105                        |  | "Cxc9"                                                                     | 3.2575254              | 4.9489529                   | -1.6914275   |  | 1.6914275   | 3.38287625   | Down in Atg <sup>ΔA</sup> Fed |  |  |                           | Cxc9          |
| "Cyp2e1"                                                                   | 8.631497                      | 7.4110317                   | 11.669573                          | 9.695422                         |  | "Cyp2e1"                                                                   | 8.02123635             | 10.6824975                  | -2.66123315  |  | 2.66123315  | 5.322535135  | Down in Atg <sup>ΔA</sup> Fed |  |  |                           | Cyp2e1        |
| "Fasn"                                                                     | 8.242026                      | 5.3067856                   | 12.1567335                         | 6.9656215                        |  | "Fasn"                                                                     | 6.7744058              | 9.5611775                   | -2.7867717   |  | 2.7867717   | 5.573543435  | Down in Atg <sup>ΔA</sup> Fed |  |  |                           | Fasn          |
| "G0s2"                                                                     | 7.023145                      | 3.283894                    | 9.727598                           | 7.7731705                        |  | "G0s2"                                                                     | 7.1257675              | 8.75038425                  | -1.62461975  |  | 1.62461975  | 3.2492395    | Down in Atg <sup>ΔA</sup> Fed |  |  |                           | G0s2          |
| "Ifi272a"                                                                  | 9.504579                      | 8.034882                    | 12.362504                          | 8.756154                         |  | "Ifi272a"                                                                  | 8.7697305              | 10.559329                   | -1.7895985   |  | 1.7895985   | 3.579186661  | Down in Atg <sup>ΔA</sup> Fed |  |  |                           | Ifi272a       |
| "Lipe"                                                                     | 5.6674976                     | 3.5509083                   | 7.712311                           | 5.1366816                        |  | "Lipe"                                                                     | 4.60920295             | 6.4244963                   | -1.81529335  |  | 1.81529335  | 3.630581829  | Down in Atg <sup>ΔA</sup> Fed |  |  |                           | Lipe          |
| "Mt1"                                                                      | 6.9133657                     | 6.7426168                   | 9.9773405                          | 7.6916103                        |  | "Mt1"                                                                      | 6.82799125             | 8.8344754                   | -2.00648415  |  | 2.00648415  | 4.018018342  | Down in Atg <sup>ΔA</sup> Fed |  |  |                           | Mt1           |
| "Mt2"                                                                      | 9.814194                      | 8.22777                     | 12.367736                          | 9.237515                         |  | "Mt2"                                                                      | 9.020982               | 10.8026255                  | -1.7816435   |  | 1.7816435   | 3.563617623  | Down in Atg <sup>ΔA</sup> Fed |  |  |                           | Mt2           |
| "Myh3"                                                                     | 6.4913054                     | 6.904511                    | 9.708744                           | 7.364139                         |  | "Myh3"                                                                     | 6.6979082              | 8.5364415                   | -1.8385333   |  | 1.8385333   | 3.67626464   | Down in Atg <sup>ΔA</sup> Fed |  |  |                           | Myh3          |
| "My10"                                                                     | 3.795729                      | 5.261227                    | 6.100662                           | 6.4276657                        |  | "My10"                                                                     | 4.528478               | 6.26416385                  | -1.73568585  |  | 1.73568585  | 3.530377808  | Down in Atg <sup>ΔA</sup> Fed |  |  |                           | My10          |
| "Myog"                                                                     | 5.4068747                     | 3.5350156                   | 8.263952                           | 4.5437593                        |  | "Myog"                                                                     | 4.47094515             | 6.40385565                  | -1.9329105   |  | 1.9329105   | 3.818247178  | Down in Atg <sup>ΔA</sup> Fed |  |  |                           | Myog          |
| "Orm1"                                                                     | 8.7206545                     | 3.1876483                   | 9.374838                           | 6.3696947                        |  | "Orm1"                                                                     | 5.9541514              | 7.87226635                  | -1.91811495  |  | 1.91811495  | 3.779289275  | Down in Atg <sup>ΔA</sup> Fed |  |  |                           | Orm1          |
| "Plac8"                                                                    | 3.0589602                     | 2.142435                    | 5.9281588                          | 3.1258373                        |  | "Plac8"                                                                    | 2.6006976              | 4.52699805                  | -1.92630045  |  | 1.92630045  | 3.800792987  | Down in Atg <sup>ΔA</sup> Fed |  |  |                           | Plac8         |
| "Pparg"                                                                    | 6.4829736                     | 4.2114906                   | 8.557508                           | 5.8448725                        |  | "Pparg"                                                                    | 5.3472321              | 7.20119025                  | -1.85395815  |  | 1.85395815  | 3.704906044  | Down in Atg <sup>ΔA</sup> Fed |  |  |                           | Pparg         |
| "Pylg"                                                                     | 6.162983                      | 4.802223                    | 9.660088                           | 6.0000033                        |  | "Pylg"                                                                     | 5.482603               | 7.83004565                  | -2.34744265  |  | 2.34744265  | 4.692683466  | Down in Atg <sup>ΔA</sup> Fed |  |  |                           | Pylg          |
| "Rbp4"                                                                     | 7.1287446                     | 2.839964                    | 7.2831583                          | 6.003764                         |  | "Rbp4"                                                                     | 4.9843205              | 6.64346115                  | -1.65914065  |  | 1.65914065  | 3.318283436  | Down in Atg <sup>ΔA</sup> Fed |  |  |                           | Rbp4          |
| "Retn"                                                                     | 8.501938                      | 4.7476807                   | 11.720504                          | 7.480853                         |  | "Retn"                                                                     | 6.62480935             | 9.6006785                   | -2.97586915  |  | 2.97586915  | 5.951730309  | Down in Atg <sup>ΔA</sup> Fed |  |  |                           | Retn          |
| "S100a8"                                                                   | 4.1567802                     | 4.392473                    | 8.319932                           | 5.9533076                        |  | "S100a8"                                                                   | 4.2746266              | 7.1366198                   | -2.8619932   |  | 2.8619932   | 5.720190664  | Down in Atg <sup>ΔA</sup> Fed |  |  |                           | S100a8        |
| "S100a9"                                                                   | 4.1980534                     | 4.8408                      | 8.799356                           | 6.642232                         |  | "S100a9"                                                                   | 4.5194267              | 7.720794                    | -3.2013673   |  | 3.2013673   | 6.409300309  | Down in Atg <sup>ΔA</sup> Fed |  |  |                           | S100a9        |
| "Slc7a10"                                                                  | 4.1628175                     | 1.7631302                   | 6.283834                           | 2.9513507                        |  | "Slc7a10"                                                                  | 2.96297385             | 4.61736705                  | -1.6543932   |  | 1.6543932   | 3.3147907612 | Down in Atg <sup>ΔA</sup> Fed |  |  |                           | Slc7a10       |
| "Sln"                                                                      | 5.104187                      | 7.063346                    | 13.119609                          | 6.300604                         |  | "Sln"                                                                      | 6.0837665              | 9.7101065                   | -3.62634     |  | 3.62634     | 7.24915138   | Down in Atg <sup>ΔA</sup> Fed |  |  |                           | Sln           |
| "Thrsp"                                                                    | 7.8929105                     | 6.84223415                  | 11.94574                           | 7.983613                         |  | "Thrsp"                                                                    | 7.367572325            | 9.9646765                   | -2.597104175 |  | 2.597104175 | 5.194408887  | Down in Atg <sup>ΔA</sup> Fed |  |  |                           | Thrsp         |
| "Tkt"                                                                      | 9.4400885                     | 7.31257725                  | 12.3759035                         | 8.4721995                        |  | "Tkt"                                                                      | 8.376332875            | 10.4240515                  | -2.047718625 |  | 2.047718625 | 4.095416494  | Down in Atg <sup>ΔA</sup> Fed |  |  |                           | Tkt           |
| "Tnnt2"                                                                    | 4.86459715                    | 5.7396736                   | 9.10765                            | 6.40016015                       |  | "Tnnt2"                                                                    | 5.302135375            | 7.753905075                 | -2.4517697   |  | 2.4517697   | 4.907867821  | Down in Atg <sup>ΔA</sup> Fed |  |  |                           | Tnnt2         |
| "1500015010Rik"                                                            | 7.397412                      | 5.0015383                   | 2.876366                           | 5.99433                          |  | "1500015010Rik"                                                            | 6.19947515             | 4.435348                    | 1.76412715   |  | 1.76412715  | 3.52834335   | Up in Atg <sup>ΔA</sup> Fed   |  |  |                           | 1500015010Rik |
| "Akr1cl"                                                                   | 5.0815463                     | 1.949523                    | 1.8875566                          | 1.9401808                        |  | "Akr1cl"                                                                   | 3.51553465             | 1.9138687                   | 1.60166595   |  | 1.60166595  | 3.223351905  | Up in Atg <sup>ΔA</sup> Fed   |  |  |                           | Akr1cl        |
| "Angptl7"                                                                  | 8.660302                      | 7.5138936                   | 2.7868233                          | 8.926546                         |  | "Angptl7"                                                                  | 8.0870978              | 5.85668465                  | 2.23041315   |  | 2.23041315  | 4.462683466  | Up in Atg <sup>ΔA</sup> Fed   |  |  |                           | Angptl7       |
| "Calm4"                                                                    | 7.3367085                     | 2.1161542                   | 2.0506725                          | 2.1588666                        |  | "Calm4"                                                                    | 4.72643135             | 2.10476955                  | 2.6216618    |  | 2.6216618   | 5.245585939  | Up in Atg <sup>ΔA</sup> Fed   |  |  |                           | Calm4         |
| "Cd248"                                                                    | 6.625474                      | 5.101178                    | 4.624593                           | 3.8987002                        |  | "Cd248"                                                                    | 5.863326               | 4.2616466                   | 1.6016794    |  | 1.6016794   | 3.204963992  | Up in Atg <sup>ΔA</sup> Fed   |  |  |                           | Cd248         |
| "Chad"                                                                     | 9.098547                      | 7.2549324                   | 3.5323287                          | 7.614661                         |  | "Chad"                                                                     | 8.1767397              | 5.56894985                  | 2.60778985   |  | 2.60778985  | 5.335779702  | Up in Atg <sup>ΔA</sup> Fed   |  |  |                           | Chad          |
| "Clca2"                                                                    | 6.237973                      | 3.0839667                   | 2.9220688                          | 3.0545027                        |  | "Clca2"                                                                    | 4.66096985             | 2.98828575                  | 1.6726841    |  | 1.6726841   | 3.346171753  | Up in Atg <sup>ΔA</sup> Fed   |  |  |                           | Clca2         |
| "Clec11a"                                                                  | 5.9345965                     | 3.4226677                   | 2.1857557                          | 2.867075                         |  | "Clec11a"                                                                  | 4.6786321              | 2.52641535                  | 2.15221675   |  | 2.15221675  | 4.304502695  | Up in Atg <sup>ΔA</sup> Fed   |  |  |                           | Clec11a       |
| "Col11a1"                                                                  | 6.9947445                     | 5.2612432                   | 2.4781497                          | 5.801592                         |  | "Col11a1"                                                                  | 6.12799385             | 4.13987085                  | 1.988123     |  | 1.988123    | 3.967205141  | Up in Atg <sup>ΔA</sup> Fed   |  |  |                           | Col11a1       |
| "Col1a1"                                                                   | 11.016381                     | 8.5815847                   | 6.7127597                          | 9.170801                         |  | "Col1a1"                                                                   | 9.79898285             | 7.94178035                  | 1.8572025    |  | 1.8572025   | 3.714044435  | Up in Atg <sup>ΔA</sup> Fed   |  |  |                           | Col1a1        |
| "Comp"                                                                     | 9.322012                      | 8.062893                    | 4.8205433                          | 8.358481                         |  | "Comp"                                                                     | 8.6924525              | 6.58951215                  | 2.10294035   |  | 2.10294035  | 4.295840266  | Up in Atg <sup>ΔA</sup> Fed   |  |  |                           | Comp          |
| "Crcrt1"                                                                   | 5.942503                      | 2.5125294                   | 2.3948672                          | 2.4992266                        |  | "Crcrt1"                                                                   | 4.2275162              | 2.4470469                   | 1.7804693    |  | 1.7804693   | 3.463379072  | Up in Atg <sup>ΔA</sup> Fed   |  |  |                           | Crcrt1        |
| "Cyp3a41a"                                                                 | 7.2227187                     | 3.2509143                   | 3.037117                           | 3.2196648                        |  | "Cyp3a41a"                                                                 | 5.2368165              | 3.1283909                   | 2.1084256    |  | 2.1084256   | 4.212024508  | Up in Atg <sup>ΔA</sup> Fed   |  |  |                           | Cyp3a41a      |
| "D0H4S114"                                                                 | 11.423829                     | 11.8465025                  | 8.26680785                         | 11.4142355                       |  | "D0H4S114"                                                                 | 11.63516575            | 9.840521675                 | 1.794644075  |  | 1.794644075 | 3.58928738   | Up in Atg <sup>ΔA</sup> Fed   |  |  |                           | D0H4S114      |
| "Dmkn"                                                                     | 8.279995                      | 2.1173058                   | 2.024026                           | 2.1150527                        |  | "Dmkn"                                                                     | 5.1986504              | 2.06953935                  | 3.12911105   |  | 3.12911105  | 6.248957076  | Up in Atg <sup>ΔA</sup> Fed   |  |  |                           | Dmkn          |
| "Dsp"                                                                      | 6.727986567                   | 2.816261433                 | 2.677258433                        | 2.785311333                      |  | "Dsp"                                                                      | 4.772124               | 2.731284883                 | 2.040839117  |  | 2.040839117 | 4.114847935  | Up in Atg <sup>ΔA</sup> Fed   |  |  |                           | Dsp           |
| "Fgfbp1"                                                                   | 7.451136                      | 7.085519                    | 3.9384544                          | 6.7910633                        |  | "Fgfbp1"                                                                   | 7.2683275              | 5.36475885                  | 1.90356865   |  | 1.90356865  | 3.741375194  | Up in Atg <sup>ΔA</sup> Fed   |  |  |                           | Fgfbp1        |
| "Kera"                                                                     | 9.294535                      | 8.168465                    | 4.2539163                          | 8.542464                         |  | "Kera"                                                                     | 8.7315                 | 6.39819015                  | 2.33330985   |  | 2.33330985  | 4.666602167  | Up in Atg <sup>ΔA</sup> Fed   |  |  |                           | Kera          |
| "Klk1"                                                                     | 7.498212                      | 3.374704                    | 3.232317733                        | 3.317427767                      |  | "Klk1"                                                                     | 5.436458               | 3.27487275                  | 2.16158525   |  | 2.16158525  | 4.324062003  | Up in Atg <sup>ΔA</sup> Fed   |  |  |                           | Klk1          |
| "Krt1"                                                                     | 5.1148005                     | 2.06592                     | 1.9618852                          | 2.0456913                        |  | "Krt1"                                                                     | 3.59036025             | 2.00378825                  | 1.586572     |  | 1.586572    | 3.1803348727 | Up in Atg <sup>ΔA</sup> Fed   |  |  |                           | Krt1          |
| "Krt10"                                                                    | 11.72377                      | 7.1096144                   | 6.5848904                          | 6.6188846                        |  | "Krt10"                                                                    | 9.4166922              | 6.6018875                   | 2.8148047    |  | 2.8148047   | 5.62640036   | Up in Atg <sup>ΔA</sup> Fed   |  |  |                           | Krt10         |
| "Krt77"                                                                    | 8.503264                      | 2.2303784                   | 2.1530895                          | 2.2294953                        |  | "Krt77"                                                                    | 5.3668212              | 2.1912924                   | 3.1755288    |  | 3.1755288   | 6.350526296  | Up in Atg <sup>ΔA</sup> Fed   |  |  |                           | Krt77         |
| "Krtadp"                                                                   | 8.681684                      | 2.3563704                   | 2.2237215                          | 2.3339849                        |  | "Krtadp"                                                                   | 5.5190272              | 2.2788532                   | 3.240174     |  | 3.240174    | 6.449080854  | Up in Atg <sup>ΔA</sup> Fed   |  |  |                           | Krtadp        |
| "Lgals7"                                                                   | 8.                            |                             |                                    |                                  |  |                                                                            |                        |                             |              |  |             |              |                               |  |  |                           |               |

| Atg7 <sup>ΔA</sup> :Fasted<br>vs.<br>Atg7 <sup>ΔA</sup> :Fasted<br>Comparison |             |            |            |             | Atg7 <sup>ΔB</sup> :Fasted<br>vs.<br>Atg7 <sup>ΔB</sup> :Fasted<br>Comparison |             |                               |              |             | Atg7 <sup>ΔA</sup> :Fasted<br>vs.<br>Atg7 <sup>ΔB</sup> :Fasted<br>Comparison |                           |        |                           |  |           |  |
|-------------------------------------------------------------------------------|-------------|------------|------------|-------------|-------------------------------------------------------------------------------|-------------|-------------------------------|--------------|-------------|-------------------------------------------------------------------------------|---------------------------|--------|---------------------------|--|-----------|--|
|                                                                               |             |            |            |             | Average                                                                       |             | Average                       |              | Diff        |                                                                               | Abs(Diff)                 |        | Regulation is based on FC |  | FC > 3    |  |
|                                                                               |             |            |            |             | Atg7 <sup>ΔA</sup> :Fasted                                                    |             | Atg7 <sup>ΔB</sup> :Fasted    |              |             |                                                                               |                           |        | Regulation                |  | Gene List |  |
|                                                                               |             |            |            |             | Atg7 <sup>ΔA</sup> :Fasted-Me                                                 |             | Atg7 <sup>ΔB</sup> :Fasted-Me |              |             |                                                                               |                           |        |                           |  |           |  |
| "Slc7a10"                                                                     | 1.8373622   | 2.0272434  | 5.925683   | 6.7308707   | "Slc7a10"                                                                     | 1.9323928   | 6.32827685                    | -4.3958848   | 4.39588405  | 21.05198038                                                                   | Down in Atg <sup>ΔA</sup> | Fasted | Slc7a10                   |  |           |  |
| "Adipoq"                                                                      | 8.484783    | 5.951186   | 13.255983  | 13.522108   | "Adipoq"                                                                      | 9.0679845   | 13.3890005                    | -4.321016    | 4.321016    | 19.98735968                                                                   | Down in Atg <sup>ΔA</sup> | Fasted | Tmem45b                   |  |           |  |
| "Tmem45b"                                                                     | 6.227733    | 3.919443   | 7.796386   | 7.141337    | "Tmem45b"                                                                     | 3.27360815  | 6.48690985                    | -4.1953071   | 4.1953071   | 18.31947117                                                                   | Down in Atg <sup>ΔA</sup> | Fasted | Adipoq                    |  |           |  |
| "Ccl8"                                                                        | 4.902584    | 3.0486117  | 7.433215   | 8.464341    | "Ccl8"                                                                        | 3.97532785  | 7.948778                      | -3.97340515  | 3.97340515  | 17.0775559                                                                    | Down in Atg <sup>ΔA</sup> | Fasted | Ccl8                      |  |           |  |
| "Adig"                                                                        | 4.775073    | 5.523609   | 8.652413   | 9.190206    | "Adig"                                                                        | 4.999341    | 8.9258095                     | -3.9264685   | 3.9264685   | 15.20494297                                                                   | Down in Atg <sup>ΔA</sup> | Fasted | Adig                      |  |           |  |
| "Hif2712a"                                                                    | 8.428789    | 7.1635404  | 11.524619  | 11.909675   | "Hif2712a"                                                                    | 7.7961647   | 11.7317147                    | -3.9209823   | 3.9209823   | 14.51732226                                                                   | Down in Atg <sup>ΔA</sup> | Fasted | Hif2712a                  |  |           |  |
| "Irx5"                                                                        | 2.4237561   | 2.49193    | 6.9715424  | 5.700547    | "Irx5"                                                                        | 2.45784305  | 6.3360447                     | -3.87820165  | 3.87820165  | 14.70466131                                                                   | Down in Atg <sup>ΔA</sup> | Fasted | Irx5                      |  |           |  |
| "Clec10a"                                                                     | 5.033356    | 5.020731   | 8.442514   | 9.273849    | "Clec10a"                                                                     | 5.0274035   | 8.8581815                     | -3.831138    | 3.831138    | 13.23270525                                                                   | Down in Atg <sup>ΔA</sup> | Fasted | Clec10a                   |  |           |  |
| "Arxes1"                                                                      | 2.6142876   | 2.6850184  | 6.0672345  | 6.8286315   | "Arxes1"                                                                      | 2.2649653   | 6.447933                      | -3.79828     | 3.79828     | 14.91222108                                                                   | Down in Atg <sup>ΔA</sup> | Fasted | Arxes1                    |  |           |  |
| "Cldec"                                                                       | 6.67895     | 7.914032   | 10.427577  | 11.761765   | "Cldec"                                                                       | 7.296491    | 11.094671                     | -3.79818     | 3.79818     | 13.91124851                                                                   | Down in Atg <sup>ΔA</sup> | Fasted | Cldec                     |  |           |  |
| "Retn"                                                                        | 9.5959364   | 6.542357   | 10.001873  | 10.033397   | "Retn"                                                                        | 6.2491467   | 10.0176135                    | -3.7684668   | 3.7684668   | 13.62766798                                                                   | Down in Atg <sup>ΔA</sup> | Fasted | Retn                      |  |           |  |
| "Glycam1"                                                                     | 2.5294313   | 2.6500441  | 2.5878937  | 9.99937     | "Glycam1"                                                                     | 2.58993635  | 6.2963185                     | -3.7036955   | 3.7036955   | 13.0293707                                                                    | Down in Atg <sup>ΔA</sup> | Fasted | Glycam1                   |  |           |  |
| "Thbs2"                                                                       | 4.4755088   | 5.6671572  | 9.018071   | 8.3836085   | "Thbs2"                                                                       | 5.071333    | 8.70083975                    | -3.62950675  | 3.62950675  | 12.37628784                                                                   | Down in Atg <sup>ΔA</sup> | Fasted | Thbs2                     |  |           |  |
| "Cpa3"                                                                        | 2.595842    | 2.4545383  | 6.129967   | 9.544948    | "Cpa3"                                                                        | 2.52519015  | 6.0374575                     | -3.51226735  | 3.51226735  | 11.01430022                                                                   | Down in Atg <sup>ΔA</sup> | Fasted | Cpa3                      |  |           |  |
| "Cd209b"                                                                      | 2.216197    | 2.2713861  | 4.130377   | 7.1883087   | "Cd209b"                                                                      | 2.24379155  | 5.6593332                     | -3.41554165  | 3.41554165  | 10.67039479                                                                   | Down in Atg <sup>ΔA</sup> | Fasted | Cd209b                    |  |           |  |
| "Cma1"                                                                        | 2.057914    | 1.9592419  | 5.560052   | 5.23067     | "Cma1"                                                                        | 2.00857795  | 5.395361                      | -3.38678305  | 3.38678305  | 10.45979774                                                                   | Down in Atg <sup>ΔA</sup> | Fasted | Cma1                      |  |           |  |
| "Iglj"                                                                        | 2.5483387   | 2.5337353  | 2.5478036  | 9.040305    | "Iglj"                                                                        | 2.541037    | 5.7940543                     | -3.2501373   | 3.2501373   | 9.533574917                                                                   | Down in Atg <sup>ΔA</sup> | Fasted | Iglj                      |  |           |  |
| "Lipe"                                                                        | 4.30964     | 5.3573494  | 7.9193273  | 8.222154    | "Lipe"                                                                        | 4.8334947   | 8.07074065                    | -3.23724595  | 3.23724595  | 9.429922734                                                                   | Down in Atg <sup>ΔA</sup> | Fasted | Lipe                      |  |           |  |
| "Postn"                                                                       | 8.621562    | 4.338486   | 10.314252  | 8.985076    | "Postn"                                                                       | 6.480204    | 9.649664                      | -3.16946     | 3.16946     | 8.997099637                                                                   | Down in Atg <sup>ΔA</sup> | Fasted | Postn                     |  |           |  |
| "Clf"                                                                         | 10.818361   | 11.362738  | 14.09993   | 14.366775   | "Clf"                                                                         | 11.0905495  | 14.2333525                    | -3.142803    | 3.142803    | 8.832384633                                                                   | Down in Atg <sup>ΔA</sup> | Fasted | Cld                       |  |           |  |
| "Pparg"                                                                       | 5.0150943   | 5.26191    | 8.090498   | 8.403034    | "Pparg"                                                                       | 5.12064265  | 8.246766                      | -3.12612335  | 3.12612335  | 8.73085748                                                                    | Down in Atg <sup>ΔA</sup> | Fasted | Pparg                     |  |           |  |
| "Irx3"                                                                        | 2.8363876   | 3.565105   | 6.5501833  | 6.05766     | "Irx3"                                                                        | 3.20074605  | 6.30392165                    | -3.1031756   | 3.1031756   | 8.59308163                                                                    | Down in Atg <sup>ΔA</sup> | Fasted | Irx3                      |  |           |  |
| "Car5b"                                                                       | 2.324872    | 2.6140912  | 5.195208   | 5.8674927   | "Car5b"                                                                       | 2.4694816   | 5.51330535                    | -3.06186875  | 3.06186875  | 6.26393569                                                                    | Down in Atg <sup>ΔA</sup> | Fasted | Car5b                     |  |           |  |
| "Aoc3"                                                                        | 5.6865514   | 5.575912   | 9.399424   | 8.085438    | "Aoc3"                                                                        | 5.7851213   | 8.742431                      | -3.0343097   | 3.0343097   | 8.19253368                                                                    | Down in Atg <sup>ΔA</sup> | Fasted | Aoc3                      |  |           |  |
| "Cnstr1"                                                                      | 4.080852    | 5.3122287  | 7.7849133  | 7.609316    | "Cnstr1"                                                                      | 4.69654035  | 7.69711475                    | -3.000574    | 3.000574    | 8.003185784                                                                   | Down in Atg <sup>ΔA</sup> | Fasted | Cnstr1                    |  |           |  |
| "Ighv14-2"                                                                    | 2.5296266   | 2.62012    | 5.967907   | 8.13724     | "Ighv14-2"                                                                    | 2.5748693   | 5.3669735                     | -2.7921042   | 2.7921042   | 6.26392771                                                                    | Down in Atg <sup>ΔA</sup> | Fasted | Ighv14-2                  |  |           |  |
| "Slc1a5"                                                                      | 5.3393807   | 6.045211   | 8.685813   | 8.2425165   | "Slc1a5"                                                                      | 5.69229585  | 8.46416475                    | -2.7718689   | 2.7718689   | 6.626910401                                                                   | Down in Atg <sup>ΔA</sup> | Fasted | Slc1a5                    |  |           |  |
| "Cd79b"                                                                       | 2.1991382   | 2.25793    | 2.2504067  | 7.680767    | "Cd79b"                                                                       | 2.2285341   | 4.9642471                     | -2.7357076   | 2.7357076   | 6.668065033                                                                   | Down in Atg <sup>ΔA</sup> | Fasted | Cd79b                     |  |           |  |
| "Lep"                                                                         | 2.413726    | 2.523169   | 7.978571   | 2.426614    | "Lep"                                                                         | 2.4684475   | 5.2025942                     | -2.7341467   | 2.7341467   | 6.556423332                                                                   | Down in Atg <sup>ΔA</sup> | Fasted | Lep                       |  |           |  |
| "Rbp7"                                                                        | 6.0023103   | 5.686909   | 7.5204244  | 9.614858    | "Rbp7"                                                                        | 5.84595965  | 8.5676412                     | -2.72168155  | 2.72168155  | 6.964612184                                                                   | Down in Atg <sup>ΔA</sup> | Fasted | Rbp7                      |  |           |  |
| "Serpin3c"                                                                    | 2.7214878   | 3.0811837  | 6.06783    | 5.156295    | "Serpin3c"                                                                    | 2.90133575  | 5.6120625                     | -2.71072675  | 2.71072675  | 6.54651341                                                                    | Down in Atg <sup>ΔA</sup> | Fasted | Serpin3c                  |  |           |  |
| "Cd52"                                                                        | 2.703623    | 2.4208422  | 5.6875176  | 3.934622    | "Cd52"                                                                        | 2.4927336   | 5.7110698                     | -2.6988372   | 2.6988372   | 6.492783932                                                                   | Down in Atg <sup>ΔA</sup> | Fasted | Cd52                      |  |           |  |
| "Camp"                                                                        | 2.607429    | 2.1793327  | 2.1378453  | 7.9004855   | "Camp"                                                                        | 2.39328085  | 5.9011654                     | -2.6258845   | 2.62588455  | 6.17626273                                                                    | Down in Atg <sup>ΔA</sup> | Fasted | Camp                      |  |           |  |
| "Adrb3"                                                                       | 2.1365664   | 2.4819722  | 4.888602   | 4.9314475   | "Adrb3"                                                                       | 2.3092693   | 4.91002475                    | -2.60075545  | 2.60075545  | 6.06604168                                                                    | Down in Atg <sup>ΔA</sup> | Fasted | Adrb3                     |  |           |  |
| "Ntrk2"                                                                       | 3.2251532   | 4.2678472  | 7.081172   | 5.586499    | "Ntrk2"                                                                       | 3.7465317   | 6.33410585                    | -2.58759215  | 2.58759215  | 6.010946377                                                                   | Down in Atg <sup>ΔA</sup> | Fasted | Ntrk2                     |  |           |  |
| "Gstt2"                                                                       | 3.8663292   | 3.738178   | 6.321238   | 6.462188    | "Gstt2"                                                                       | 3.8100735   | 6.391173                      | -2.5816395   | 2.5816395   | 5.986195932                                                                   | Down in Atg <sup>ΔA</sup> | Fasted | Gstt2                     |  |           |  |
| "Dram1"                                                                       | 4.7368603   | 4.729132   | 7.3217416  | 7.1794524   | "Dram1"                                                                       | 4.73299662  | 7.250597                      | -2.51760085  | 2.51760085  | 5.72629045                                                                    | Down in Atg <sup>ΔA</sup> | Fasted | Dram1                     |  |           |  |
| "Heph"                                                                        | 2.6527781   | 2.2881143  | 6.026128   | 4.908032    | "Heph"                                                                        | 2.4704461   | 5.46708                       | -2.4966338   | 2.4966338   | 6.543670656                                                                   | Down in Atg <sup>ΔA</sup> | Fasted | Heph                      |  |           |  |
| "Slc1a3"                                                                      | 2.703754567 | 2.9373427  | 4.9467915  | 5.769937    | "Slc1a3"                                                                      | 2.820595883 | 5.51336425                    | -2.492768367 | 2.492768367 | 5.628569728                                                                   | Down in Atg <sup>ΔA</sup> | Fasted | Slc1a3                    |  |           |  |
| "Ces1f"                                                                       | 5.6160684   | 6.6131785  | 6.2118917  | 9.652529    | "Ces1f"                                                                       | 4.11462345  | 6.58855835                    | -2.4739349   | 2.4739349   | 5.555669849                                                                   | Down in Atg <sup>ΔA</sup> | Fasted | Ces1f                     |  |           |  |
| "Ltb"                                                                         | 3.5354903   | 3.683256   | 3.5927522  | 8.4762745   | "Ltb"                                                                         | 3.58687315  | 6.03451335                    | -2.4476402   | 2.4476402   | 5.455236666                                                                   | Down in Atg <sup>ΔA</sup> | Fasted | Ltb                       |  |           |  |
| "Cidea"                                                                       | 3.5328283   | 4.3549113  | 4.6867377  | 6.2889967   | "Cidea"                                                                       | 3.345098    | 6.3878672                     | -2.4443574   | 2.4443574   | 5.54283616                                                                    | Down in Atg <sup>ΔA</sup> | Fasted | Cidea                     |  |           |  |
| "Vnn1"                                                                        | 5.3223267   | 3.142268   | 7.085514   | 6.239304    | "Vnn1"                                                                        | 4.23229735  | 6.662409                      | -2.43011165  | 2.43011165  | 5.389351733                                                                   | Down in Atg <sup>ΔA</sup> | Fasted | Vnn1                      |  |           |  |
| "Fabp4"                                                                       | 8.0488034   | 9.4360695  | 11.199385  | 11.13073275 | "Fabp4"                                                                       | 8.74243645  | 11.5333563                    | -2.422899175 | 2.422899175 | 6.362457588                                                                   | Down in Atg <sup>ΔA</sup> | Fasted | Fabp4                     |  |           |  |
| "Cdc80"                                                                       | 6.23290835  | 5.78743875 | 8.6331774  | 8.15368585  | "Cdc80"                                                                       | 6.01017355  | 8.393431625                   | -2.383258075 | 2.383258075 | 5.21713612                                                                    | Down in Atg <sup>ΔA</sup> | Fasted | Cdc80                     |  |           |  |
| "Lyl1"                                                                        | 1.7680407   | 2.6790671  | 3.8596779  | 5.350005    | "Lyl1"                                                                        | 2.2235539   | 4.60484235                    | -2.38128845  | 2.38128845  | 5.21001836                                                                    | Down in Atg <sup>ΔA</sup> | Fasted | Lyl1                      |  |           |  |
| "Ptprc"                                                                       | 7.131884    | 3.7169151  | 6.098307   | 4.368233    | "Ptprc"                                                                       | 5.42439959  | 7.767565                      | -2.34316545  | 2.34316545  | 5.074147373                                                                   | Down in Atg <sup>ΔA</sup> | Fasted | Ptprc                     |  |           |  |
| "Ilgk8-30"                                                                    | 2.6565204   | 2.8640656  | 2.689704   | 7.5052808   | "Ilgk8-30"                                                                    | 2.7660293   | 5.0977624                     | -2.33174694  | 2.33174694  | 5.054152316                                                                   | Down in Atg <sup>ΔA</sup> | Fasted | Ilgk8-30                  |  |           |  |
| "F13a1"                                                                       | 8.081537    | 3.7576394  | 9.183208   | 9.244247    | "F13a1"                                                                       | 6.9095882   | 9.2137275                     | -2.3041393   | 2.3041393   | 4.938727265                                                                   | Down in Atg <sup>ΔA</sup> | Fasted | F13a1                     |  |           |  |
| "Gna1"                                                                        | 4.669807033 | 5.0595746  | 7.59969833 | 6.736818967 | "Gna1"                                                                        | 4.864690817 | 7.1682444                     | -2.303553583 | 2.303553583 | 4.936722609                                                                   | Down in Atg <sup>ΔA</sup> | Fasted | Gna1                      |  |           |  |
| "Cd48"                                                                        | 3.5494323   | 2.1356204  | 3.8054245  | 6.4838114   | "Cd48"                                                                        | 2.84252635  | 5.14461795                    | -2.3020916   | 2.3020916   | 4.931722418                                                                   | Down in Atg <sup>ΔA</sup> | Fasted | Cd48                      |  |           |  |
| "Ppp2r1b"                                                                     | 6.508765    | 6.079277   | 7.97095    | 9.137731    | "Ppp2r1b"                                                                     | 6.29257675  | 8.5543405                     | -2.26176375  | 2.26176375  | 4.795772454                                                                   | Down in Atg <sup>ΔA</sup> | Fasted | Ppp2r1b                   |  |           |  |
| "Col1a2"                                                                      | 9.916441    | 7.7128563  | 11.249618  | 10.877014   | "Col1a2"                                                                      | 8.81464865  | 11.063316                     | -2.24866735  | 2.24866735  | 4.752346499                                                                   | Down in Atg <sup>ΔA</sup> | Fasted | Col1a2                    |  |           |  |
| "Retnla"                                                                      | 8.923125    | 3.314442   | 11.437994  | 10.21379    | "Retnla"                                                                      | 8.6187835   | 10.8596865                    | -2.240903    | 2.240903    | 4.762928361                                                                   | Down in Atg <sup>ΔA</sup> | Fasted | Retnla                    |  |           |  |
| "Cd37"                                                                        | 2.0774124   | 2.1460035  | 2.4089236  | 6.294243    | "Cd37"                                                                        | 2.11170795  | 4.3515833                     | -2.23987535  | 2.23987535  | 4.72362509                                                                    | Down in Atg <sup>ΔA</sup> | Fasted | Cd37                      |  |           |  |
| "G6pdx"                                                                       | 3.9735787   | 3.982053   | 6.471136   | 5.9383135   | "G6pdx"                                                                       | 3.97781585  | 6.20472475                    | -2.2269089   | 2.2269089   | 4.681298953                                                                   | Down in Atg <sup>ΔA</sup> | Fasted | G6pdx                     |  |           |  |
| "Pou2f1"                                                                      | 2.363243    | 2.4643426  | 2.4231772  | 6.852175    | "Pou2f1"                                                                      | 2.4137928   | 4.6376761                     | -2.2238833   | 2.2238833   | 4.671491685                                                                   | Down in Atg <sup>ΔA</sup> | Fasted | Pou2f1                    |  |           |  |
| "Dpt"                                                                         | 8.99678     | 8.7645855  | 11.445797  | 10.7593355  | "Dpt"                                                                         | 8.88213175  | 11.10230725                   | -2.201755    | 2.201755    | 4.659501127                                                                   | Down in Atg <sup>ΔA</sup> | Fasted | Dpt                       |  |           |  |
| "Rab34"                                                                       | 5.02430585  | 4.762518   | 7.3760993  | 6.7993053   | "Rab34"                                                                       | 4.893411925 | 7.0877023                     | -2.194290375 | 2.194290375 | 4.576644953                                                                   | Down in Atg <sup>ΔA</sup> | Fasted | Rab34                     |  |           |  |
| "G0s2"                                                                        | 4.2997036   | 5.95347    | 6.91788    | 6.58913     | "G0s2"                                                                        | 5.1175253   | 7.3103505                     | -2.1928252   | 2.1928252   | 4.571999355                                                                   | Down in Atg <sup>ΔA</sup> | Fasted | G0s2                      |  |           |  |
| "Dbp"                                                                         | 4.842288    | 6.2590325  | 9.1900115  | 6.27670815  | "Dbp"                                                                         | 5.55066525  | 7.733359825                   | -2.182694    | 2.182694    | 4.54005987                                                                    | Down in Atg <sup>ΔA</sup> | Fasted | Dbp                       |  |           |  |
| "Rassf2"                                                                      | 3.0063684   | 3.242813   | 4.7456846  | 5.855088    | "Rassf2"                                                                      | 3.1245907   | 5.3007363                     | -2.1761556   | 2.1761556   | 4.519476274                                                                   | Down in Atg <sup>ΔA</sup> | Fasted | Rassf2                    |  |           |  |
| "Abcg1"                                                                       | 5.8441024   | 4.7842843  | 6.7976894  | 8.143523    | "Abcg1"                                                                       | 5.29619335  | 7.4705062                     | -2.17441285  | 2.17441285  | 4.541002123                                                                   | Down in Atg <sup>ΔA</sup> | Fasted | Abcg1                     |  |           |  |
| "Cd3d"                                                                        | 2.049481    | 2.1099436  | 2.0968397  | 6.3903103   | "Cd3d"                                                                        | 2.0797123   | 4.243575                      | -2.1638627   | 2.1638627   | 4.481130371                                                                   | Down in Atg <sup>ΔA</sup> | Fasted | Cd3d                      |  |           |  |
| "Ctsk"                                                                        | 5.305433    | 5.9716177  | 6.7702017  | 6.7757397   | "Ctsk"                                                                        | 4.63852535  | 6.7729077                     | -2.13444535  | 2.13444535  | 4.390682915                                                                   | Down in Atg <sup>ΔA</sup> | Fasted | Ctsk                      |  |           |  |
| "Dgat1"                                                                       | 5.840915    | 3.8587883  | 7.4715233  | 5.805876    | "Dgat1"                                                                       | 5.86839665  | 7.98869965                    | -2.120033    | 2.120033    | 4.347852506                                                                   | Down in Atg <sup>ΔA</sup> | Fasted | Dgat1                     |  |           |  |
| "Sowahc"                                                                      | 5.1261253   | 5.0971904  | 6.6631757  | 7.797819    | "Sowahc"                                                                      | 5.11165785  | 7.23049825                    | -2.1188404   | 2.1188404   | 4.343446899                                                                   | Down in Atg <sup>ΔA</sup> | Fasted | Sowahc                    |  |           |  |
| "Asns"                                                                        | 4.2329357   | 4.1541757  | 6.451009   | 6.1509905   | "Asns                                                                         |             |                               |              |             |                                                                               |                           |        |                           |  |           |  |

|                 |             |             |             |             |                 |             |             |              |             |             |                            |        |               |
|-----------------|-------------|-------------|-------------|-------------|-----------------|-------------|-------------|--------------|-------------|-------------|----------------------------|--------|---------------|
| "Pyhin1"        | 2.39966085  | 2.3658645   | 2.35603415  | 6.22985695  | "Pyhin1"        | 2.382762675 | 4.29294555  | -1.910182875 | 1.910182875 | 3.7585674   | Down in Atg <sup>ALA</sup> | Fasted | Pyhin1        |
| "Fbap5"         | 8.736258    | 6.81255065  | 9.379227    | 9.98257     | "Fbap5"         | 7.774404325 | 9.6808985   | -1.906494175 | 1.906494175 | 3.748969725 | Down in Atg <sup>ALA</sup> | Fasted | Fbap5         |
| "Irf4"          | 3.29286755  | 2.5526888   | 4.20704175  | 5.4454532   | "Irf4"          | 2.922778175 | 4.826247475 | -1.9034693   | 1.9034693   | 3.741117556 | Down in Atg <sup>ALA</sup> | Fasted | Irf4          |
| "Mgl2"          | 4.633865    | 3.3577425   | 6.608474    | 5.1575313   | "Mgl2"          | 3.99580375  | 5.88300265  | -1.8871989   | 1.8871989   | 3.69116307  | Down in Atg <sup>ALA</sup> | Fasted | Mgl2          |
| "Lmd2"          | 3.6404982   | 2.7678144   | 3.058596    | 7.1174285   | "Lmd2"          | 3.2041563   | 5.08801225  | -1.88385595  | 1.88385595  | 3.690601454 | Down in Atg <sup>ALA</sup> | Fasted | Lmd2          |
| "Mrc1"          | 8.41392     | 5.3057003   | 8.669322    | 8.808847    | "Mrc1"          | 6.85981015  | 8.7390845   | -1.87927435  | 1.87927435  | 3.678899176 | Down in Atg <sup>ALA</sup> | Fasted | Mrc1          |
| "Bglap"         | 2.6869      | 2.8527813   | 2.7580185   | 6.528796    | "Bglap"         | 2.76984065  | 4.64340725  | -1.8735666   | 1.8735666   | 3.664373599 | Down in Atg <sup>ALA</sup> | Fasted | Bglap         |
| "Cd53"          | 7.974239    | 4.0254884   | 6.7846727   | 8.937265    | "Cd53"          | 5.998637    | 7.86096885  | -1.86110515  | 1.86110515  | 3.63285844  | Down in Atg <sup>ALA</sup> | Fasted | Cd53          |
| "Car4"          | 5.3566034   | 6.1519807   | 7.4588817   | 7.77162585  | "Car4"          | 5.75429205  | 7.615253775 | -1.860961725 | 1.860961725 | 3.632497299 | Down in Atg <sup>ALA</sup> | Fasted | Car4          |
| "Fam117a"       | 4.894046    | 4.776582    | 6.657695    | 6.729451    | "Fam117a"       | 4.835314    | 6.693573    | -1.858259    | 1.858259    | 3.625698599 | Down in Atg <sup>ALA</sup> | Fasted | Fam117a       |
| "Sell"          | 2.07518075  | 2.0877591   | 2.08562255  | 5.78826715  | "Sell"          | 2.081469925 | 3.93694485  | -1.855474925 | 1.855474925 | 3.618708567 | Down in Atg <sup>ALA</sup> | Fasted | Sell          |
| "Cyp4b1"        | 6.3152018   | 6.1331205   | 7.5264506   | 8.589213    | "Cyp4b1"        | 6.22416115  | 8.0578318   | -1.83367065  | 1.83367065  | 3.564428174 | Down in Atg <sup>ALA</sup> | Fasted | Cyp4b1        |
| "LOC665506"     | 2.542740533 | 2.623010633 | 2.538813867 | 6.2784249   | "LOC665506"     | 2.582875583 | 4.408619383 | -1.8257438   | 1.8257438   | 3.544897223 | Down in Atg <sup>ALA</sup> | Fasted | LOC665506     |
| "Slc22a4"       | 4.651461    | 4.218093    | 6.001408    | 6.5089006   | "Slc22a4"       | 4.4347777   | 6.2551543   | -1.8203773   | 1.8203773   | 3.5317355   | Down in Atg <sup>ALA</sup> | Fasted | Slc22a4       |
| "H2-Aa"         | 7.90171575  | 5.75831605  | 7.82187585  | 9.4773405   | "H2-Aa"         | 6.8300159   | 8.649608175 | -1.819592275 | 1.819592275 | 3.529814271 | Down in Atg <sup>ALA</sup> | Fasted | H2-Aa         |
| "Ngp"           | 3.953581    | 2.1652493   | 1.996304    | 7.7582226   | "Ngp"           | 3.05941515  | 4.8772633   | -1.81784815  | 1.81784815  | 3.525549533 | Down in Atg <sup>ALA</sup> | Fasted | Ngp           |
| "Plin2"         | 8.884167    | 6.6757946   | 8.971621    | 10.195623   | "Plin2"         | 7.7799808   | 9.583622    | -1.8036412   | 1.8036412   | 3.49100204  | Down in Atg <sup>ALA</sup> | Fasted | Plin2         |
| "Ltf"           | 1.981188    | 1.9949515   | 1.97355     | 5.5916057   | "Ltf"           | 1.98806975  | 3.78257785  | -1.7945081   | 1.7945081   | 3.468971769 | Down in Atg <sup>ALA</sup> | Fasted | Ltf           |
| "Spib"          | 1.9907975   | 2.0345793   | 2.016317    | 5.5944834   | "Spib"          | 2.0126884   | 3.8054002   | -1.7927118   | 1.7927118   | 3.464658584 | Down in Atg <sup>ALA</sup> | Fasted | Spib          |
| "Sla"           | 4.0580263   | 2.7835938   | 3.9346617   | 4.688373    | "Sla"           | 3.42078305  | 5.21151885  | -1.7907358   | 1.7907358   | 3.459913092 | Down in Atg <sup>ALA</sup> | Fasted | Sla           |
| "AU020206"      | 4.840019    | 5.1073117   | 6.089278    | 7.4294467   | "AU020206"      | 4.97366535  | 6.75936235  | -1.785697    | 1.785697    | 3.447849974 | Down in Atg <sup>ALA</sup> | Fasted | AU020206      |
| "Lox1"          | 6.725958    | 3.5815063   | 7.583466    | 6.288081    | "Lox1"          | 5.15373215  | 6.9357735   | -1.78204135  | 1.78204135  | 3.439124514 | Down in Atg <sup>ALA</sup> | Fasted | Lox1          |
| "Lhx8"          | 2.685162    | 2.868961    | 4.393999    | 4.7219687   | "Lhx8"          | 2.7770615   | 4.55798385  | -1.78092235  | 1.78092235  | 3.436458055 | Down in Atg <sup>ALA</sup> | Fasted | Lhx8          |
| "Ilgk-V28"      | 3.026745217 | 2.463014067 | 2.449121817 | 6.591685883 | "Ilgk-V28"      | 2.744879642 | 4.52040385  | -1.775524208 | 1.775524208 | 3.423623863 | Down in Atg <sup>ALA</sup> | Fasted | Ilgk-V28      |
| "Myo1g"         | 2.8149056   | 2.8328936   | 3.270536    | 5.9153376   | "Myo1g"         | 2.8238996   | 4.529456    | -1.769046    | 1.769046    | 3.408283051 | Down in Atg <sup>ALA</sup> | Fasted | Myo1g         |
| "Napsa"         | 3.0751116   | 2.492464    | 2.4834654   | 6.6164145   | "Napsa"         | 2.78378795  | 4.54993995  | -1.766152    | 1.766152    | 3.401454993 | Down in Atg <sup>ALA</sup> | Fasted | Napsa         |
| "Parp9"         | 5.2402177   | 3.231864    | 6.155615    | 5.839849    | "Parp9"         | 4.93736535  | 5.997732    | -1.76169115  | 1.76169115  | 3.3909358   | Down in Atg <sup>ALA</sup> | Fasted | Parp9         |
| "4931406C07Rik" | 6.6353468   | 4.4028475   | 7.1384218   | 7.439617    | "4931406C07Rik" | 5.52809715  | 7.2890194   | -1.76092225  | 1.76092225  | 3.389147086 | Down in Atg <sup>ALA</sup> | Fasted | 4931406C07Rik |
| "Pitx2"         | 4.7992464   | 4.28895665  | 7.106496    | 5.49411885  | "Pitx2"         | 4.544110575 | 6.300307425 | -1.75619685  | 1.75619685  | 3.378064442 | Down in Atg <sup>ALA</sup> | Fasted | Pitx2         |
| "Itih5"         | 9.149037    | 8.24468     | 10.700045   | 10.205944   | "Itih5"         | 8.6968585   | 10.4529945  | -1.756136    | 1.756136    | 3.377921965 | Down in Atg <sup>ALA</sup> | Fasted | Itih5         |
| "Rgs10"         | 4.832187    | 3.6272757   | 5.641651    | 6.312833    | "Rgs10"         | 4.22973135  | 5.977242    | -1.74751065  | 1.74751065  | 3.357786846 | Down in Atg <sup>ALA</sup> | Fasted | Rgs10         |
| "H2-Eb1"        | 7.508851    | 5.7725935   | 7.5904765   | 9.170656    | "H2-Eb1"        | 6.64027225  | 8.38056625  | -1.739844    | 1.739844    | 3.339905002 | Down in Atg <sup>ALA</sup> | Fasted | H2-Eb1        |
| "Scd1"          | 7.51499165  | 7.2931855   | 9.6858005   | 8.5977378   | "Scd1"          | 7.404085175 | 9.14176915  | -1.737680575 | 1.737680575 | 3.334985699 | Down in Atg <sup>ALA</sup> | Fasted | Scd1          |
| "H2-DMa"        | 4.5240207   | 2.9933136   | 4.806206    | 6.1655693   | "H2-DMa"        | 3.78866715  | 5.48588765  | -1.7272205   | 1.7272205   | 3.310893259 | Down in Atg <sup>ALA</sup> | Fasted | H2-DMa        |
| "Slc24a3"       | 4.645862    | 4.713696    | 6.7449675   | 6.0716343   | "Slc24a3"       | 4.6811158   | 6.4083009   | -1.7271851   | 1.7271851   | 3.310812019 | Down in Atg <sup>ALA</sup> | Fasted | Slc24a3       |
| "Ctdspl"        | 6.3242927   | 6.7396636   | 8.438747    | 8.066437    | "Ctdspl"        | 6.53197815  | 8.252592    | -1.72061385  | 1.72061385  | 3.295766081 | Down in Atg <sup>ALA</sup> | Fasted | Ctdspl        |
| "Cd74"          | 6.1466071   | 4.806307    | 6.156258    | 7.5338683   | "Cd74"          | 5.16335085  | 6.84506315  | -1.6817123   | 1.6817123   | 3.20808485  | Down in Atg <sup>ALA</sup> | Fasted | Cd74          |
| "Spon1"         | 4.1760038   | 4.706957    | 6.3139493   | 5.9243705   | "Spon1"         | 4.45334975  | 6.1191599   | -1.66581015  | 1.66581015  | 3.172917808 | Down in Atg <sup>ALA</sup> | Fasted | Spon1         |
| "Il10rb"        | 3.6149567   | 5.1711674   | 7.0803976   | 7.730094    | "Il10rb"        | 5.74306295  | 7.4055248   | -1.66218375  | 1.66218375  | 3.164952286 | Down in Atg <sup>ALA</sup> | Fasted | Il10rb        |
| "Mgst2"         | 3.675026    | 4.5288653   | 5.699356    | 5.8207936   | "Mgst2"         | 4.410194565 | 5.7600748   | -1.65812915  | 1.65812915  | 3.156066882 | Down in Atg <sup>ALA</sup> | Fasted | Mgst2         |
| "Cas8"          | 4.983979    | 3.8253107   | 5.6794357   | 6.4443803   | "Cas8"          | 4.40644885  | 6.061908    | -1.65726315  | 1.65726315  | 3.154175971 | Down in Atg <sup>ALA</sup> | Fasted | Cas8          |
| "Apccd1"        | 4.029412325 | 4.523743275 | 6.86163775  | 4.993598175 | "Apccd1"        | 4.2765778   | 5.927797963 | -1.651220163 | 1.651220163 | 3.140991769 | Down in Atg <sup>ALA</sup> | Fasted | Apccd1        |
| "C1qc"          | 8.430551    | 3.3618007   | 7.0685453   | 8.015673    | "C1qc"          | 5.89617585  | 7.54210915  | -1.6459333   | 1.6459333   | 3.129502438 | Down in Atg <sup>ALA</sup> | Fasted | C1qc          |
| "Coro1b"        | 5.4738054   | 5.0704007   | 6.6258593   | 7.2021093   | "Coro1b"        | 5.27192305  | 6.9139843   | -1.64206125  | 1.64206125  | 3.121114426 | Down in Atg <sup>ALA</sup> | Fasted | Coro1b        |
| "Ganc"          | 4.14909     | 4.276231    | 5.829165    | 5.8632417   | "Ganc"          | 4.4126605   | 5.84620335  | -1.63354285  | 1.63354285  | 3.102740089 | Down in Atg <sup>ALA</sup> | Fasted | Ganc          |
| "Skap2"         | 6.4104176   | 4.812801    | 7.3585153   | 7.117711    | "Skap2"         | 5.6116093   | 7.23811315  | -1.62650385  | 1.62650385  | 3.087638496 | Down in Atg <sup>ALA</sup> | Fasted | Skap2         |
| "Aacs"          | 3.5529246   | 3.54537925  | 5.4823335   | 4.8607195   | "Aacs"          | 3.549151925 | 5.1517265   | -1.622374575 | 1.622374575 | 3.078813706 | Down in Atg <sup>ALA</sup> | Fasted | Aacs          |
| "Fndc1"         | 6.487474    | 4.709859    | 7.7830653   | 6.656336    | "Fndc1"         | 5.5986665   | 7.21970065  | -1.62103415  | 1.62103415  | 3.075954473 | Down in Atg <sup>ALA</sup> | Fasted | Fndc1         |
| "H2-Ab1"        | 6.3212825   | 4.39650333  | 6.3055712   | 7.6483929   | "H2-Ab1"        | 5.35889276  | 6.97698205  | -1.618089283 | 1.618089283 | 3.069682158 | Down in Atg <sup>ALA</sup> | Fasted | H2-Ab1        |
| "Lmo2"          | 6.413649    | 5.149147    | 7.009587    | 7.786153    | "Lmo2"          | 5.7813978   | 7.39787     | -1.616472    | 1.616472    | 3.066242925 | Down in Atg <sup>ALA</sup> | Fasted | Lmo2          |
| "Cd163"         | 9.527046    | 6.7032976   | 9.405528    | 10.046544   | "Cd163"         | 8.1151718   | 9.725901    | -1.6107292   | 1.6107292   | 3.054061682 | Down in Atg <sup>ALA</sup> | Fasted | Cd163         |
| "Thbs3"         | 4.5495906   | 6.280304    | 5.6925287   | 4.7363496   | "Thbs3"         | 3.6149473   | 5.21443915  | -1.59949185  | 1.59949185  | 3.030635581 | Down in Atg <sup>ALA</sup> | Fasted | Thbs3         |
| "Ptpn18"        | 4.2047      | 3.6621113   | 4.5788465   | 6.4814973   | "Ptpn18"        | 3.93340565  | 5.5301719   | -1.59676625  | 1.59676625  | 3.024645892 | Down in Atg <sup>ALA</sup> | Fasted | Ptpn18        |
| "Il7r"          | 2.6280259   | 2.71011005  | 2.66316365  | 5.85705715  | "Il7r"          | 2.66907975  | 4.2601104   | -1.591042425 | 1.591042425 | 3.012669525 | Down in Atg <sup>ALA</sup> | Fasted | Il7r          |
| "Serpina3g"     | 2.4207451   | 2.10091     | 2.0746033   | 5.628723    | "Serpina3g"     | 2.26082755  | 3.85166315  | -1.5908356   | 1.5908356   | 3.012237659 | Down in Atg <sup>ALA</sup> | Fasted | Serpina3g     |
| "lgfbp1"        | 14.038539   | 2.072088    | 2.06451755  | 2.02945     | "lgfbp1"        | 8.0553135   | 2.04281275  | 6.01250075   | 6.01250075  | 64.5596052  | Up in Atg <sup>ALA</sup>   | Fasted | lgfbp1        |
| "Saa1"          | 14.5162125  | 2.54701055  | 2.7631073   | 2.38969925  | "Saa1"          | 8.53163775  | 2.576403275 | 5.9552105    | 5.9552105   | 6.024360025 | Up in Atg <sup>ALA</sup>   | Fasted | Saa1          |
| "Saa2"          | 14.581544   | 4.469973    | 3.745225    | 3.5637093   | "Saa2"          | 9.52572065  | 3.65446715  | 5.8712535    | 5.8712535   | 58.3605036  | Up in Atg <sup>ALA</sup>   | Fasted | Saa2          |
| "Fgb"           | 13.99886    | 3.0056462   | 4.550703    | 2.601563    | "Fgb"           | 8.5022531   | 3.576133    | 4.9261201    | 4.9261201   | 30.40254307 | Up in Atg <sup>ALA</sup>   | Fasted | Fgb           |
| "Arg1"          | 11.953897   | 2.0973692   | 2.1758988   | 2.0569108   | "Arg1"          | 7.0256331   | 2.1164048   | 4.9092283    | 4.9092283   | 30.0486506  | Up in Atg <sup>ALA</sup>   | Fasted | Arg1          |
| "Tat"           | 11.810372   | 2.114052    | 2.1050785   | 2.0779858   | "Tat"           | 6.962212    | 2.09153215  | 4.87067985   | 4.87067985  | 29.25638983 | Up in Atg <sup>ALA</sup>   | Fasted | Tat           |
| "Cps1"          | 12.647393   | 1.9845172   | 2.957277    | 1.9519948   | "Cps1"          | 7.3159551   | 2.4546359   | 4.8613192    | 4.8613192   | 29.06717984 | Up in Atg <sup>ALA</sup>   | Fasted | Cps1          |
| "Itih4"         | 12.119061   | 1.8634597   | 2.576516    | 1.832448    | "Itih4"         | 6.99126035  | 2.204482    | 4.78677835   | 4.78677835  | 27.60348181 | Up in Atg <sup>ALA</sup>   | Fasted | Itih4         |
| "Fgg"           | 14.087277   | 3.5314841   | 5.179291    | 2.9366515   | "Fgg"           | 8.80938085  | 4.05797125  | 4.7514093    | 4.7514093   | 26.93498394 | Up in Atg <sup>ALA</sup>   | Fasted | Fgg           |
| "Orm2"          | 12.158334   | 3.1455293   | 3.0295913   | 2.9557426   | "Orm2"          | 7.15931165  | 2.99266695  | 4.6592647    | 4.6592647   | 25.2884401  | Up in Atg <sup>ALA</sup>   | Fasted | Orm2          |
| "Mat1a"         | 12.536324   | 2.63385     | 3.3295345   | 2.5924284   | "Mat1a"         | 7.5848545   | 2.96098145  | 4.62387305   | 4.62387305  | 24.65610576 | Up in Atg <sup>ALA</sup>   | Fasted | Mat1a         |
| "Cyp2c70"       | 11.294845   | 2.1667528   | 2.1760504   | 2.1275914   | "Cyp2c70"       | 7.307989    | 2.1518209   | 4.578978     | 4.578978    | 23.90065804 | Up in Atg <sup>ALA</sup>   | Fasted | Cyp2c70       |
| "Pah"           | 12.855556   | 3.200562    | 3.6250303   | 3.4445696   | "Pah"           | 8.0280411   | 3.53479995  | 4.49324115   | 4.49324115  | 22.52165824 | Up in Atg <sup>ALA</sup>   | Fasted | Pah           |
| "Ces1c"         | 12.068588   |             |             |             |                 |             |             |              |             |             |                            |        |               |

|                 |             |             |             |             |                 |             |             |             |             |             |                          |        |               |
|-----------------|-------------|-------------|-------------|-------------|-----------------|-------------|-------------|-------------|-------------|-------------|--------------------------|--------|---------------|
| "Slc27a5"       | 10.1382675  | 2.2722812   | 2.6182437   | 2.2107613   | "Slc27a5"       | 6.20527435  | 2.4145025   | 3.79077185  | 3.79077185  | 13.839982   | Up in Atg <sup>ALA</sup> | Fasted | Slc27a5       |
| "Ugt3a2"        | 9.596507    | 2.1478012   | 2.135414    | 2.0485454   | "Ugt3a2"        | 5.8721541   | 2.0919797   | 3.7801744   | 3.7801744   | 13.7387068  | Up in Atg <sup>ALA</sup> | Fasted | Ugt3a2        |
| "Crp"           | 9.622058    | 2.2125733   | 2.1850226   | 2.132408    | "Crp"           | 5.91731565  | 2.1587153   | 3.75860035  | 3.75860035  | 13.53478767 | Up in Atg <sup>ALA</sup> | Fasted | Crp           |
| "Azgpl1"        | 11.238541   | 2.6133308   | 3.8181912   | 2.464193    | "Azgpl1"        | 6.9259359   | 3.1911921   | 3.7347438   | 3.7347438   | 13.3128154  | Up in Atg <sup>ALA</sup> | Fasted | Azgpl1        |
| "Cyp2d26"       | 9.711626    | 2.3295314   | 2.3318993   | 2.2586112   | "Cyp2d26"       | 6.0205787   | 2.28880025  | 3.73177845  | 3.73177845  | 13.28548002 | Up in Atg <sup>ALA</sup> | Fasted | Cyp2d26       |
| "Apoc4"         | 9.652882    | 2.110466    | 2.2500668   | 2.0620136   | "Apoc4"         | 5.881674    | 2.1564002   | 3.7256338   | 3.7256338   | 13.22901554 | Up in Atg <sup>ALA</sup> | Fasted | Apoc4         |
| "Ttc36"         | 9.300999    | 1.9246119   | 1.9379311   | 1.9156953   | "Ttc36"         | 5.61280545  | 1.9268132   | 3.68599225  | 3.68599225  | 12.87044648 | Up in Atg <sup>ALA</sup> | Fasted | Ttc36         |
| "C4bp"          | 9.902678    | 2.6735246   | 2.6735246   | 2.594483    | "C4bp"          | 6.2881013   | 2.6340038   | 3.6540975   | 3.6540975   | 12.58904968 | Up in Atg <sup>ALA</sup> | Fasted | C4bp          |
| "Ugt2b5"        | 9.756211    | 2.7250805   | 2.693652    | 2.495524    | "Ugt2b5"        | 6.24064575  | 2.594588    | 3.64605775  | 3.64605775  | 12.51908963 | Up in Atg <sup>ALA</sup> | Fasted | Ugt2b5        |
| "Aass"          | 9.840425    | 2.7998302   | 2.7074406   | 2.6409094   | "Aass"          | 6.3201276   | 2.674175    | 3.6459526   | 3.6459526   | 12.51817721 | Up in Atg <sup>ALA</sup> | Fasted | Aass          |
| "Hc"            | 9.797356    | 2.5921986   | 2.5945532   | 2.5499983   | "Hc"            | 6.1947773   | 2.57227575  | 3.62250155  | 3.62250155  | 12.31633877 | Up in Atg <sup>ALA</sup> | Fasted | Hc            |
| "Hpd"           | 11.467001   | 2.3707335   | 4.0227957   | 2.5897138   | "Hpd"           | 6.9188675   | 3.30625475  | 3.6126125   | 3.6126125   | 12.23220428 | Up in Atg <sup>ALA</sup> | Fasted | Hpd           |
| "Saa4"          | 9.34074835  | 2.2945655   | 2.26081135  | 2.21218685  | "Saa4"          | 5.817656925 | 2.2364991   | 3.581157825 | 3.581157825 | 11.96839529 | Up in Atg <sup>ALA</sup> | Fasted | Saa4          |
| "Apom"          | 9.630094    | 2.8275343   | 2.805825    | 2.6045071   | "Apom"          | 6.22881415  | 2.70516605  | 3.5236481   | 3.5236481   | 11.50068669 | Up in Atg <sup>ALA</sup> | Fasted | Apom          |
| "1300017J02Rik" | 9.807227    | 2.757159    | 2.7529566   | 2.7663026   | "1300017J02Rik" | 6.282193    | 2.7596296   | 3.5225634   | 3.5225634   | 11.49204307 | Up in Atg <sup>ALA</sup> | Fasted | 1300017J02Rik |
| "Serpina1a"     | 13.308547   | 2.9127288   | 6.477963    | 2.7009883   | "Serpina1a"     | 8.1106379   | 4.58947565  | 3.52116225  | 3.52116225  | 11.48088738 | Up in Atg <sup>ALA</sup> | Fasted | Serpina1a     |
| "Fetub"         | 9.277067    | 2.3435118   | 2.3309      | 2.2591023   | "Fetub"         | 5.8102894   | 2.29500115  | 3.51528825  | 3.51528825  | 11.43423745 | Up in Atg <sup>ALA</sup> | Fasted | Fetub         |
| "Vsig4"         | 9.9658985   | 2.4578395   | 2.6603608   | 2.74222     | "Vsig4"         | 6.211869    | 2.7012904   | 3.5105786   | 3.5105786   | 11.39697146 | Up in Atg <sup>ALA</sup> | Fasted | Vsig4         |
| "Rgn"           | 9.450135    | 2.1640666   | 2.532168    | 2.0828416   | "Rgn"           | 5.8071008   | 2.3075048   | 3.4995956   | 3.4995956   | 11.31054075 | Up in Atg <sup>ALA</sup> | Fasted | Rgn           |
| "Angptl3"       | 9.37959     | 2.5519972   | 2.5193887   | 2.4368734   | "Angptl3"       | 5.9657936   | 2.47813105  | 3.48766255  | 3.48766255  | 11.21736993 | Up in Atg <sup>ALA</sup> | Fasted | Angptl3       |
| "ApoH"          | 12.58154    | 3.3491974   | 5.7847066   | 2.9032304   | "ApoH"          | 7.8036757   | 4.3439685   | 3.4597072   | 3.4597072   | 11.0021014  | Up in Atg <sup>ALA</sup> | Fasted | ApoH          |
| "Mug1"          | 10.825929   | 2.6076655   | 4.0379877   | 2.484064    | "Mug1"          | 6.71679725  | 3.26102585  | 3.4557714   | 3.4557714   | 10.9721276  | Up in Atg <sup>ALA</sup> | Fasted | Mug1          |
| "Cyp7b1"        | 9.584972    | 2.7805275   | 2.9073888   | 2.59342325  | "Cyp7b1"        | 6.182749625 | 2.750406025 | 3.4323436   | 3.4323436   | 10.79539106 | Up in Atg <sup>ALA</sup> | Fasted | Cyp7b1        |
| "Cd5l"          | 9.48611     | 2.3662248   | 2.3804984   | 2.6238523   | "Cd5l"          | 5.9261674   | 2.50217535  | 3.42399205  | 3.42399205  | 10.73307861 | Up in Atg <sup>ALA</sup> | Fasted | Cd5l          |
| "Cyp3a25"       | 9.626839    | 2.4325104   | 2.6020234   | 2.3642447   | "Cyp3a25"       | 6.0296747   | 2.61313405  | 3.41654065  | 3.41654065  | 10.67778611 | Up in Atg <sup>ALA</sup> | Fasted | Cyp3a25       |
| "Cxc1l"         | 9.630547    | 2.871994    | 2.8854032   | 2.7881434   | "Cxc1l"         | 6.2512705   | 2.8367733   | 3.4144972   | 3.4144972   | 10.66267267 | Up in Atg <sup>ALA</sup> | Fasted | Cxc1l         |
| "F9"            | 8.691565    | 1.9674864   | 1.9323701   | 1.9086045   | "F9"            | 5.3295257   | 1.9204873   | 3.4090384   | 3.4090384   | 10.6272404  | Up in Atg <sup>ALA</sup> | Fasted | F9            |
| "Ith1l"         | 9.232942    | 2.49335     | 2.4853233   | 2.4318783   | "Ith1l"         | 5.863146    | 2.4856053   | 3.4045407   | 3.4045407   | 10.5893395  | Up in Atg <sup>ALA</sup> | Fasted | Ith1l         |
| "Cyp2d10"       | 10.366225   | 2.7412508   | 3.6433904   | 2.657933    | "Cyp2d10"       | 6.5537379   | 3.1506617   | 3.4030762   | 3.4030762   | 10.57859556 | Up in Atg <sup>ALA</sup> | Fasted | Cyp2d10       |
| "Hal"           | 8.844816    | 2.132173    | 2.1087651   | 2.0732064   | "Hal"           | 5.4884945   | 2.0908575   | 3.39750875  | 3.39750875  | 10.53785707 | Up in Atg <sup>ALA</sup> | Fasted | Hal           |
| "Cyp3a11"       | 12.409155   | 1.4376997   | 5.653143    | 1.4110755   | "Cyp3a11"       | 6.92342735  | 3.53210925  | 3.3913181   | 3.3913181   | 10.4277294  | Up in Atg <sup>ALA</sup> | Fasted | Cyp3a11       |
| "Sds"           | 9.59369     | 2.8779008   | 2.8683383   | 2.827839    | "Sds"           | 6.2357954   | 2.84808865  | 3.38770675  | 3.38770675  | 10.4664968  | Up in Atg <sup>ALA</sup> | Fasted | Sds           |
| "Myog"          | 9.664056    | 6.500363    | 5.726863    | 3.6710043   | "Myog"          | 6.0820095   | 4.99839365  | 3.38327585  | 3.38327585  | 10.4344008  | Up in Atg <sup>ALA</sup> | Fasted | Myog          |
| "Gc"            | 13.510806   | 2.3297157   | 6.8769445   | 2.236045    | "Gc"            | 7.92026085  | 4.55649475  | 3.3637661   | 3.3637661   | 10.29424487 | Up in Atg <sup>ALA</sup> | Fasted | Gc            |
| "C8a"           | 8.951149    | 2.359877    | 2.3240514   | 2.281853    | "C8a"           | 5.655513    | 2.3029522   | 3.3525608   | 3.3525608   | 10.21459997 | Up in Atg <sup>ALA</sup> | Fasted | C8a           |
| "Pigr"          | 8.98830325  | 2.3650502   | 2.3592859   | 2.32161295  | "Pigr"          | 5.67667675  | 2.340449425 | 3.3362273   | 3.3362273   | 10.09960735 | Up in Atg <sup>ALA</sup> | Fasted | Pigr          |
| "Orm1"          | 13.964493   | 6.121978    | 7.507102    | 5.92613     | "Orm1"          | 10.0432355  | 6.716616    | 3.3266195   | 3.3266195   | 10.03257127 | Up in Atg <sup>ALA</sup> | Fasted | Orm1          |
| "Ass1"          | 8.836982    | 2.343545    | 2.3007996   | 2.241959    | "Ass1"          | 5.5902635   | 2.2713793   | 3.3188842   | 3.3188842   | 9.97892357  | Up in Atg <sup>ALA</sup> | Fasted | Ass1          |
| "Apoa2"         | 14.148873   | 2.6960707   | 7.8027554   | 2.4980721   | "Apoa2"         | 8.42427185  | 5.15041375  | 3.2720581   | 3.2720581   | 9.66023376  | Up in Atg <sup>ALA</sup> | Fasted | Apoa2         |
| "Asgr1"         | 8.647444    | 2.1595132   | 2.1468034   | 2.119688    | "Asgr1"         | 5.4034786   | 2.1324527   | 3.2702329   | 3.2702329   | 9.648020014 | Up in Atg <sup>ALA</sup> | Fasted | Asgr1         |
| "Ugt2a3"        | 8.525341    | 2.1471477   | 2.1203103   | 2.0470583   | "Ugt2a3"        | 5.33624435  | 2.0836843   | 3.25256005  | 3.25256005  | 9.53055381  | Up in Atg <sup>ALA</sup> | Fasted | Ugt2a3        |
| "Ugt2b1"        | 8.442541    | 2.0167228   | 2.0057652   | 1.9767605   | "Ugt2b1"        | 5.2961679   | 1.99126285  | 3.23839905  | 3.23839905  | 9.437462783 | Up in Atg <sup>ALA</sup> | Fasted | Ugt2b1        |
| "Amy2a1"        | 9.097994    | 3.2839577   | 3.0434242   | 2.8996792   | "Amy2a1"        | 6.19097585  | 2.9270017   | 3.21897415  | 3.21897415  | 9.311245436 | Up in Atg <sup>ALA</sup> | Fasted | Amy2a1        |
| "Upb1"          | 9.133528    | 2.6783469   | 2.7236652   | 2.65217     | "Upb1"          | 5.90593745  | 2.6879176   | 3.21801985  | 3.21801985  | 9.30058836  | Up in Atg <sup>ALA</sup> | Fasted | Upb1          |
| "Cyp3a13"       | 9.555749    | 3.345165    | 3.2537267   | 3.2289293   | "Cyp3a13"       | 6.450457    | 3.241328    | 3.209129    | 3.209129    | 9.247290527 | Up in Atg <sup>ALA</sup> | Fasted | Cyp3a13       |
| "Serpinc1"      | 11.89003    | 2.738366    | 5.5519695   | 2.747592    | "Serpinc1"      | 7.336998    | 4.14978075  | 3.18721725  | 3.18721725  | 9.108523748 | Up in Atg <sup>ALA</sup> | Fasted | Serpinc1      |
| "Cyp2b10"       | 8.947486333 | 2.571058767 | 2.619705267 | 2.5384678   | "Cyp2b10"       | 5.75927255  | 2.579086533 | 3.180186017 | 3.180186017 | 9.064239927 | Up in Atg <sup>ALA</sup> | Fasted | Cyp2b10       |
| "Cyp2c37"       | 8.940808    | 2.724697    | 2.7958417   | 2.5473497   | "Cyp2c37"       | 5.8327525   | 2.6715957   | 3.1611568   | 3.1611568   | 8.945466997 | Up in Atg <sup>ALA</sup> | Fasted | Cyp2c37       |
| "Ttr"           | 13.80640317 | 3.036834433 | 8.114156067 | 2.426041367 | "Ttr"           | 8.4216188   | 5.270098717 | 3.151520083 | 3.151520083 | 8.885913413 | Up in Atg <sup>ALA</sup> | Fasted | Ttr           |
| "Cyp2c29"       | 8.510878    | 2.3380704   | 2.3178105   | 2.2440727   | "Cyp2c29"       | 5.4244742   | 2.2809416   | 3.1435326   | 3.1435326   | 8.836852478 | Up in Atg <sup>ALA</sup> | Fasted | Cyp2c29       |
| "Cyp2c50"       | 10.2922325  | 3.507657    | 4.3671384   | 3.1629763   | "Cyp2c50"       | 6.89994475  | 3.76505735  | 3.1348874   | 3.1348874   | 8.784056902 | Up in Atg <sup>ALA</sup> | Fasted | Cyp2c50       |
| "Cyp8b1"        | 8.384294    | 2.2019942   | 2.1781847   | 2.1442397   | "Cyp8b1"        | 5.2931441   | 2.1612122   | 3.1319319   | 3.1319319   | 8.766080334 | Up in Atg <sup>ALA</sup> | Fasted | Cyp8b1        |
| "C9"            | 8.58229     | 2.403735    | 2.3864849   | 2.3644524   | "C9"            | 5.5065125   | 2.37546865  | 3.13104385  | 3.13104385  | 8.760686039 | Up in Atg <sup>ALA</sup> | Fasted | C9            |
| "Slc3a1"        | 8.095481    | 1.8965583   | 1.8974133   | 1.83591     | "Slc3a1"        | 4.99601965  | 1.86666165  | 3.129358    | 3.129358    | 8.750454078 | Up in Atg <sup>ALA</sup> | Fasted | Slc3a1        |
| "Tff3"          | 8.2347145   | 2.1360438   | 2.103503    | 2.0727696   | "Tff3"          | 5.18537915  | 2.0881363   | 3.09724285  | 3.09724285  | 8.55787123  | Up in Atg <sup>ALA</sup> | Fasted | Tff3          |
| "Cyp1a2"        | 8.211791    | 2.14333     | 2.1143603   | 2.0753582   | "Cyp1a2"        | 5.1776505   | 2.09485925  | 3.08270125  | 3.08270125  | 8.471991216 | Up in Atg <sup>ALA</sup> | Fasted | Cyp1a2        |
| "F13b"          | 8.382931    | 2.3383822   | 2.323714    | 2.2430487   | "F13b"          | 5.3606566   | 2.28338135  | 3.07727525  | 3.07727525  | 8.440188676 | Up in Atg <sup>ALA</sup> | Fasted | F13b          |
| "Apon"          | 8.791931    | 2.3486357   | 2.765973    | 2.2514079   | "Apon"          | 5.57028335  | 2.60869045  | 3.0615929   | 3.0615929   | 8.348939181 | Up in Atg <sup>ALA</sup> | Fasted | Apon          |
| "Tfr2"          | 8.42833015  | 2.3542301   | 2.401835    | 2.2817078   | "Tfr2"          | 5.391280125 | 2.34244655  | 3.048833575 | 3.048833575 | 8.275425969 | Up in Atg <sup>ALA</sup> | Fasted | Tfr2          |
| "Upp2"          | 8.6444765   | 2.8034914   | 2.72884585  | 2.6696162   | "Upp2"          | 5.72398395  | 2.699231025 | 3.024752925 | 3.024752925 | 8.138443363 | Up in Atg <sup>ALA</sup> | Fasted | Upp2          |
| "F5"            | 8.56780915  | 2.6658609   | 2.64914795  | 2.5993655   | "F5"            | 5.616885025 | 2.624256725 | 2.9925783   | 2.9925783   | 7.958951032 | Up in Atg <sup>ALA</sup> | Fasted | F5            |
| "Serpina1c"     | 13.873818   | 1.494161    | 7.912987    | 1.5066366   | "Serpina1c"     | 7.6838995   | 4.7098118   | 2.9741777   | 2.9741777   | 7.8580846   | Up in Atg <sup>ALA</sup> | Fasted | Serpina1c     |
| "Apoa5"         | 11.498968   | 3.1555498   | 5.4943614   | 3.2420876   | "Apoa5"         | 7.3272589   | 4.3822425   | 2.9590344   | 2.9590344   | 7.776033315 | Up in Atg <sup>ALA</sup> | Fasted | Apoa5         |
| "Serpinf2"      | 8.121497    | 3.3240085   | 2.8903053   | 2.6447482   | "Serpinf2"      | 5.72275275  | 2.76752675  | 2.955226    | 2.955226    | 7.755533534 | Up in Atg <sup>ALA</sup> | Fasted | Serpinf2      |
| "Ces1g"         | 8.264779    | 2.544441    | 2.4840174   | 2.448159    | "Ces1g"         | 5.40961     | 2.4660882   | 2.9435218   | 2.9435218   | 7.692869313 | Up in Atg <sup>ALA</sup> | Fasted | Ces1g         |
| "Alb"           | 15.423029   | 4.820199    | 11.291389   | 3.0695987   | "Alb"           | 10.121614   | 7.18049385  | 2.94112015  | 2.94112015  | 7.680073671 | Up in Atg <sup>ALA</sup> | Fasted | Alb           |
| "Slc10a1"       | 8.1833207   | 2.240955    | 2.39774125  | 2.1605367   | "Slc10a1"       | 5.21213795  | 2.329138975 | 2.932998875 | 2.932998875 | 7.636962158 | Up in Atg <sup>ALA</sup> | Fasted | Slc10a1       |
| "Cyp17a1"       | 7.673218    | 1.8974712   | 1.8828053   | 1.8547827   | "Cyp17a1"       | 4.7853446   | 1.868794    | 2.9165506   | 2.9165506   | 7.550387039 | Up in Atg <sup>ALA</sup> | Fasted | Cyp17a1       |
| "Cth"           | 12.534038   | 6.287839    | 6.550976    | 6.447081    | "Cth"           | 9.4109385   | 6.4990285   | 2.9         |             |             |                          |        |               |

|             |            |             |             |             |             |             |             |             |             |             |                          |        |           |
|-------------|------------|-------------|-------------|-------------|-------------|-------------|-------------|-------------|-------------|-------------|--------------------------|--------|-----------|
| "Mettl7b"   | 7.417821   | 2.4686363   | 2.4152818   | 2.3989754   | "Mettl7b"   | 4.94322865  | 2.4071286   | 2.53610005  | 2.53610005  | 5.800189527 | Up in Atg <sup>ALA</sup> | Fasted | Mettl7b   |
| "Hsd17b2"   | 7.3621693  | 2.5190065   | 2.4607303   | 2.3512814   | "Hsd17b2"   | 4.94322865  | 2.40600585  | 2.53458205  | 2.53458205  | 5.794089857 | Up in Atg <sup>ALA</sup> | Fasted | Hsd17b2   |
| "H2-Q10"    | 9.787179   | 3.4076087   | 4.659608    | 3.4678247   | "H2-Q10"    | 6.59289385  | 4.06371635  | 2.5291775   | 2.5291775   | 5.772424906 | Up in Atg <sup>ALA</sup> | Fasted | H2-Q10    |
| "Gjb2"      | 7.452399   | 2.3945131   | 2.452106    | 2.3873074   | "Gjb2"      | 4.92345605  | 2.4197067   | 2.50374935  | 2.50374935  | 5.671574693 | Up in Atg <sup>ALA</sup> | Fasted | Gjb2      |
| "Ces3a"     | 8.168003   | 2.715075    | 3.3333185   | 2.553096    | "Ces3a"     | 5.441539    | 2.94320725  | 2.49833175  | 2.49833175  | 5.650316767 | Up in Atg <sup>ALA</sup> | Fasted | Ces3a     |
| "Orm3"      | 7.089934   | 2.1719453   | 2.1488526   | 2.1318886   | "Orm3"      | 4.63093965  | 2.1403706   | 2.49056905  | 2.49056905  | 5.619959791 | Up in Atg <sup>ALA</sup> | Fasted | Orm3      |
| "Abcc2"     | 7.2771096  | 2.5616007   | 2.491483    | 2.4117267   | "Abcc2"     | 4.91935155  | 2.45160485  | 2.4677503   | 2.4677503   | 5.53180499  | Up in Atg <sup>ALA</sup> | Fasted | Abcc2     |
| "Abcg5"     | 7.0052824  | 2.1845472   | 2.1588306   | 2.1213286   | "Abcg5"     | 4.5949148   | 2.1400796   | 2.4548352   | 2.4548352   | 5.482504914 | Up in Atg <sup>ALA</sup> | Fasted | Abcg5     |
| "Lipc"      | 6.8024974  | 1.9750408   | 1.9520394   | 1.928804    | "Lipc"      | 4.3887691   | 1.9404217   | 2.4483474   | 2.4483474   | 5.457905441 | Up in Atg <sup>ALA</sup> | Fasted | Lipc      |
| "Sc4mol"    | 9.557418   | 5.091032    | 4.843695    | 4.9373055   | "Sc4mol"    | 7.323775    | 4.89050025  | 2.43277475  | 2.43277475  | 5.401180455 | Up in Atg <sup>ALA</sup> | Fasted | Sc4mol    |
| "Pde4b"     | 10.783598  | 10.269751   | 7.69335785  | 8.4951275   | "Pde4b"     | 10.5266745  | 8.094242675 | 2.432431825 | 2.432431825 | 5.398025623 | Up in Atg <sup>ALA</sup> | Fasted | Pde4b     |
| "Gsta3"     | 8.0844045  | 3.16811765  | 3.3704594   | 3.0257158   | "Gsta3"     | 5.626261075 | 3.1980876   | 2.428173475 | 2.428173475 | 5.382115961 | Up in Atg <sup>ALA</sup> | Fasted | Gsta3     |
| "Hgfac"     | 6.8261523  | 2.0199652   | 2.0069385   | 1.9927076   | "Hgfac"     | 4.42305875  | 1.99982305  | 2.4232357   | 2.4232357   | 5.363726592 | Up in Atg <sup>ALA</sup> | Fasted | Hgfac     |
| "Gpld1"     | 6.978179   | 2.2376451   | 2.2461855   | 2.176842    | "Gpld1"     | 4.60791205  | 2.21151375  | 2.3963983   | 2.3963983   | 5.264871428 | Up in Atg <sup>ALA</sup> | Fasted | Gpld1     |
| "Sec14I4"   | 7.497799   | 3.1477542   | 2.6765635   | 3.1815288   | "Sec14I4"   | 5.3227766   | 2.92904615  | 2.39373045  | 2.39373045  | 5.255144557 | Up in Atg <sup>ALA</sup> | Fasted | Sec14I4   |
| "C8b"       | 6.959394   | 2.2047475   | 2.194908    | 2.1850953   | "C8b"       | 4.58342075  | 2.19000165  | 2.3934191   | 2.3934191   | 5.254010559 | Up in Atg <sup>ALA</sup> | Fasted | C8b       |
| "Sqle"      | 6.9614525  | 2.1626284   | 2.163468    | 2.176564    | "Sqle"      | 4.56204045  | 2.170016    | 2.39202445  | 2.39202445  | 5.248933974 | Up in Atg <sup>ALA</sup> | Fasted | Sqle      |
| "Elowl2"    | 7.4215117  | 2.9069986   | 2.8161554   | 2.740253    | "Elowl2"    | 5.16425515  | 2.7782042   | 2.38605095  | 2.38605095  | 5.227245617 | Up in Atg <sup>ALA</sup> | Fasted | Elowl2    |
| "Cyp2c54"   | 6.4468293  | 1.7896036   | 1.7900268   | 1.7512842   | "Cyp2c54"   | 4.11821645  | 1.7706555   | 2.34756095  | 2.34756095  | 5.089630597 | Up in Atg <sup>ALA</sup> | Fasted | Cyp2c54   |
| "Slc22a26"  | 6.76086415 | 2.1436471   | 2.1228484   | 2.0871098   | "Slc22a26"  | 4.452259225 | 2.1049791   | 2.34727385  | 2.34727385  | 5.088617848 | Up in Atg <sup>ALA</sup> | Fasted | Slc22a26  |
| "Muskl"     | 6.7110624  | 4.847542    | 3.3314507   | 1.7927037   | "Muskl"     | 4.52993202  | 5.2620772   | 2.337225    | 2.337225    | 5.053297089 | Up in Atg <sup>ALA</sup> | Fasted | Muskl     |
| "Dpys"      | 6.90161205 | 2.3978896   | 2.34415115  | 2.29927635  | "Dpys"      | 4.649750825 | 2.32171375  | 2.328037075 | 2.328037075 | 5.021217001 | Up in Atg <sup>ALA</sup> | Fasted | Dpys      |
| "Apoa4"     | 7.004621   | 2.51513185  | 2.50207115  | 2.384104    | "Apoa4"     | 4.59876425  | 2.443087575 | 2.31678885  | 2.31678885  | 4.982220421 | Up in Atg <sup>ALA</sup> | Fasted | Apoa4     |
| "Lect2"     | 6.704752   | 2.1704779   | 2.1559632   | 2.0954509   | "Lect2"     | 4.43761495  | 2.12570705  | 2.3119079   | 2.3119079   | 4.965392971 | Up in Atg <sup>ALA</sup> | Fasted | Lect2     |
| "Cpn1"      | 7.1388435  | 2.5837297   | 2.570476    | 2.558243    | "Cpn1"      | 4.8612866   | 2.5643595   | 2.2969271   | 2.2969271   | 4.914099604 | Up in Atg <sup>ALA</sup> | Fasted | Cpn1      |
| "Acsm1"     | 6.611679   | 2.1190915   | 2.0908382   | 2.0584793   | "Acsm1"     | 4.36538525  | 2.07465875  | 2.2907265   | 2.2907265   | 4.893024478 | Up in Atg <sup>ALA</sup> | Fasted | Acsm1     |
| "Ddc"       | 6.689088   | 2.5718415   | 2.364668    | 2.3272727   | "Ddc"       | 4.63046475  | 2.34369535  | 2.2867694   | 2.2867694   | 4.879622021 | Up in Atg <sup>ALA</sup> | Fasted | Ddc       |
| "Gnmt"      | 11.374454  | 4.8728547   | 6.646552    | 5.0305214   | "Gnmt"      | 8.12365435  | 5.8385367   | 2.28511765  | 2.28511765  | 4.87403851  | Up in Atg <sup>ALA</sup> | Fasted | Gnmt      |
| "Abcc3"     | 7.155351   | 2.759202    | 2.793356    | 2.5552287   | "Abcc3"     | 4.927765    | 2.67429235  | 2.28298415  | 2.28298415  | 4.866835965 | Up in Atg <sup>ALA</sup> | Fasted | Abcc3     |
| "Try4"      | 6.903418   | 2.4895413   | 4.4383214   | 2.4014468   | "Try4"      | 4.69647965  | 2.4198841   | 2.27659555  | 2.27659555  | 4.845332095 | Up in Atg <sup>ALA</sup> | Fasted | Try4      |
| "Serpina12" | 6.592496   | 2.3540177   | 2.221239    | 2.1759398   | "Serpina12" | 4.47325865  | 2.1985894   | 2.27466745  | 2.27466745  | 4.838860841 | Up in Atg <sup>ALA</sup> | Fasted | Serpina12 |
| "Slc10a4"   | 7.105038   | 2.4937644   | 2.6092286   | 2.447962    | "Slc10a4"   | 4.7994012   | 2.5285953   | 2.2708059   | 2.2708059   | 4.825926356 | Up in Atg <sup>ALA</sup> | Fasted | Slc10a4   |
| "lyd"       | 6.5352845  | 2.0580616   | 2.0336313   | 2.0181205   | "lyd"       | 4.29667305  | 2.0258759   | 2.27079715  | 2.27079715  | 4.825897086 | Up in Atg <sup>ALA</sup> | Fasted | lyd       |
| "Reep6"     | 7.0805717  | 2.655613    | 2.6277714   | 2.570835    | "Reep6"     | 4.86809235  | 2.5993032   | 2.26878915  | 2.26878915  | 4.819184884 | Up in Atg <sup>ALA</sup> | Fasted | Reep6     |
| "Aldh8a1"   | 6.8864802  | 2.7459016   | 2.3809106   | 2.72675575  | "Aldh8a1"   | 4.8161909   | 2.55383175  | 2.262357725 | 2.262357725 | 4.797749139 | Up in Atg <sup>ALA</sup> | Fasted | Aldh8a1   |
| "Pla2g12b"  | 6.4968805  | 2.0633411   | 2.0455158   | 2.0182157   | "Pla2g12b"  | 4.2801108   | 2.03186575  | 2.24824505  | 2.24824505  | 4.751045588 | Up in Atg <sup>ALA</sup> | Fasted | Pla2g12b  |
| "Dmkn"      | 6.468942   | 2.0669742   | 2.0385854   | 2.0113938   | "Dmkn"      | 4.2679581   | 2.0249896   | 2.2429685   | 2.2429685   | 4.73370073  | Up in Atg <sup>ALA</sup> | Fasted | Dmkn      |
| "F7"        | 6.248997   | 1.8191268   | 1.8153844   | 1.7827706   | "F7"        | 4.0340619   | 1.7990775   | 2.2349844   | 2.2349844   | 4.707576045 | Up in Atg <sup>ALA</sup> | Fasted | F7        |
| "Bhmt2"     | 7.1519792  | 3.0528336   | 2.95660505  | 2.79565545  | "Bhmt2"     | 5.1024064   | 2.87613025  | 2.22627615  | 2.22627615  | 4.679426327 | Up in Atg <sup>ALA</sup> | Fasted | Bhmt2     |
| "Abcb11"    | 6.4486194  | 2.0915532   | 2.0739233   | 2.0225832   | "Abcb11"    | 4.2700863   | 2.0225325   | 2.22183305  | 2.22183305  | 4.664857626 | Up in Atg <sup>ALA</sup> | Fasted | Abcb11    |
| "Gcgr"      | 6.78842    | 2.5300126   | 2.4791307   | 2.397358    | "Gcgr"      | 4.6592163   | 2.43824435  | 2.22097195  | 2.22097195  | 4.662074148 | Up in Atg <sup>ALA</sup> | Fasted | Gcgr      |
| "Kmo"       | 7.0845637  | 2.5511935   | 2.4990525   | 2.7015593   | "Kmo"       | 4.8178786   | 2.6003059   | 2.2175727   | 2.2175727   | 4.65110239  | Up in Atg <sup>ALA</sup> | Fasted | Kmo       |
| "Cyp26a1"   | 6.2083344  | 1.8631912   | 1.8431289   | 1.8225082   | "Cyp26a1"   | 4.0357628   | 1.83281855  | 2.20294425  | 2.20294425  | 4.604180043 | Up in Atg <sup>ALA</sup> | Fasted | Cyp26a1   |
| "Rab30"     | 7.4909163  | 4.722667    | 3.3874164   | 4.426296    | "Rab30"     | 6.10679165  | 3.9068562   | 2.19993545  | 2.19993545  | 4.594587841 | Up in Atg <sup>ALA</sup> | Fasted | Rab30     |
| "Slc2a2"    | 6.3506026  | 2.0093217   | 1.9965429   | 1.9693611   | "Slc2a2"    | 4.17996215  | 1.982952    | 2.19701015  | 2.19701015  | 4.585281002 | Up in Atg <sup>ALA</sup> | Fasted | Slc2a2    |
| "Cyp2c44"   | 6.5409193  | 2.1897254   | 2.179955    | 2.1614437   | "Cyp2c44"   | 4.36532235  | 2.17069935  | 2.194623    | 2.194623    | 4.577700258 | Up in Atg <sup>ALA</sup> | Fasted | Cyp2c44   |
| "Slm"       | 11.867102  | 8.419928    | 8.832644    | 7.082613    | "Slm"       | 10.143515   | 7.9576285   | 2.1858865   | 2.1858865   | 4.550062934 | Up in Atg <sup>ALA</sup> | Fasted | Slm       |
| "Bhmt"      | 11.465633  | 3.1372366   | 7.416707    | 2.8186142   | "Bhmt"      | 5.13704348  | 5.1176606   | 2.1837742   | 2.1837742   | 4.543450903 | Up in Atg <sup>ALA</sup> | Fasted | Bhmt      |
| "Raggef4"   | 7.209152   | 3.0994266   | 2.944517    | 3.01012535  | "Raggef4"   | 5.1542893   | 2.97321175  | 2.176968125 | 2.176968125 | 4.52202358  | Up in Atg <sup>ALA</sup> | Fasted | Raggef4   |
| "Gdf15"     | 6.6131635  | 3.607225    | 2.3268816   | 2.2994275   | "Gdf15"     | 4.486943    | 2.31315455  | 2.17378845  | 2.17378845  | 4.512626737 | Up in Atg <sup>ALA</sup> | Fasted | Gdf15     |
| "Agmat"     | 6.4232693  | 2.2306964   | 2.1763945   | 2.1459265   | "Agmat"     | 4.32698285  | 2.1611605   | 2.16582235  | 2.16582235  | 4.487221342 | Up in Atg <sup>ALA</sup> | Fasted | Agmat     |
| "Uroc1"     | 6.972877   | 2.2481942   | 2.694486    | 2.2052717   | "Uroc1"     | 4.051356    | 2.44987885  | 2.16065675  | 2.16065675  | 4.471183481 | Up in Atg <sup>ALA</sup> | Fasted | Uroc1     |
| "Krt2dap"   | 6.5134025  | 2.297905    | 2.2736437   | 2.2454195   | "Krt2dap"   | 4.40565375  | 2.2595316   | 2.14612215  | 2.14612215  | 4.426364168 | Up in Atg <sup>ALA</sup> | Fasted | Krt2dap   |
| "Cideb"     | 6.269945   | 2.0898685   | 2.0560505   | 2.0230024   | "Cideb"     | 4.19796675  | 2.03952645  | 2.1403803   | 2.1403803   | 4.408782482 | Up in Atg <sup>ALA</sup> | Fasted | Cideb     |
| "Spp2"      | 6.4991166  | 2.3054895   | 2.2978659   | 2.235313    | "Spp2"      | 4.40232775  | 2.26658945  | 2.1357383   | 2.1357383   | 4.394619629 | Up in Atg <sup>ALA</sup> | Fasted | Spp2      |
| "Mst1"      | 6.5614853  | 2.3990135   | 2.3875885   | 2.3121996   | "Mst1"      | 4.4802494   | 2.34989405  | 2.13035535  | 2.13035535  | 4.378253079 | Up in Atg <sup>ALA</sup> | Fasted | Mst1      |
| "Hrsp12"    | 10.44891   | 5.80417     | 6.389597    | 5.6255126   | "Hrsp12"    | 8.12654     | 6.0075548   | 2.1189852   | 2.1189852   | 4.343882863 | Up in Atg <sup>ALA</sup> | Fasted | Hrsp12    |
| "Pipox"     | 6.0598087  | 1.8935056   | 1.8768171   | 1.8502738   | "Pipox"     | 3.97665715  | 1.86354545  | 2.1131117   | 2.1131117   | 4.326233998 | Up in Atg <sup>ALA</sup> | Fasted | Pipox     |
| "Cyp4a10"   | 7.014346   | 2.230186    | 2.8696852   | 2.1592543   | "Cyp4a10"   | 4.6222662   | 2.51446975  | 2.10779655  | 2.10779655  | 4.310324692 | Up in Atg <sup>ALA</sup> | Fasted | Cyp4a10   |
| "Ppargc1a"  | 10.5399109 | 8.136667    | 7.36993956  | 7.09622522  | "Ppargc1a"  | 9.93828895  | 7.23308239  | 2.10520656  | 2.10520656  | 4.302595840 | Up in Atg <sup>ALA</sup> | Fasted | Ppargc1a  |
| "Amdhd1"    | 6.6889215  | 2.7179773   | 2.6192725   | 2.5840194   | "Amdhd1"    | 4.7034494   | 2.60164595  | 2.10180345  | 2.10180345  | 4.29245631  | Up in Atg <sup>ALA</sup> | Fasted | Amdhd1    |
| "Acx2"      | 6.5082893  | 2.3881567   | 2.3758264   | 2.349794    | "Acx2"      | 4.448223    | 2.3628102   | 2.0854128   | 2.0854128   | 4.243965122 | Up in Atg <sup>ALA</sup> | Fasted | Acx2      |
| "ApoC3"     | 12.979844  | 6.0950103   | 7.5412645   | 7.3634834   | "ApoC3"     | 9.53742715  | 7.45237395  | 2.0850532   | 2.0850532   | 4.242907422 | Up in Atg <sup>ALA</sup> | Fasted | ApoC3     |
| "Gsta2"     | 6.631053   | 2.7475014   | 2.6593652   | 2.5850935   | "Gsta2"     | 4.6892772   | 2.62222935  | 2.06704785  | 2.06704785  | 4.190283486 | Up in Atg <sup>ALA</sup> | Fasted | Gsta2     |
| "Hdc24"     | 7.201019   | 3.21044675  | 3.2435362   | 3.05487585  | "Hdc24"     | 5.205732875 | 3.149206025 | 2.05652685  | 2.05652685  | 4.159836572 | Up in Atg <sup>ALA</sup> | Fasted | Hdc24     |
| "Nipsnap1"  | 6.47704885 | 2.40156555  | 2.4323782   | 2.34257615  | "Nipsnap1"  | 4.4393072   | 2.387477175 | 2.051830025 | 2.051830025 | 4.146315866 | Up in Atg <sup>ALA</sup> | Fasted | Nipsnap1  |
| "Cfhr1"     | 7.112573   | 3.219853    | 3.3166445   | 3.022437    | "Cfhr1"     | 5.166213    | 3.11954075  | 2.04667225  | 2.04667225  | 4.13151885  | Up in Atg <sup>ALA</sup> | Fasted | Cfhr1     |
| "Krt8"      | 6.23623167 | 2.256452167 | 2.231746733 | 2.172398433 | "Krt8"      | 4.244537667 | 2.202072583 | 2.042465083 | 2.042465083 | 4.119488214 | Up in Atg <sup>ALA</sup> | Fasted | Krt8      |
| "Hpn"       | 7.6269712  | 4.4183207   | 4.44        |             |             |             |             |             |             |             |                          |        |           |

|                 |             |             |             |            |                 |             |             |             |             |             |                                |               |
|-----------------|-------------|-------------|-------------|------------|-----------------|-------------|-------------|-------------|-------------|-------------|--------------------------------|---------------|
| "Pm20d1"        | 6.5272026   | 2.935048    | 3.0634015   | 2.9126027  | "Pm20d1"        | 4.7311253   | 2.9880021   | 1.7431232   | 1.7431232   | 3.347590828 | Up_in_Atg <sup>ΔΔ</sup> Fasted | Pm20d1        |
| "Foxa3"         | 5.7058077   | 2.3186707   | 2.2871819   | 2.2530968  | "Foxa3"         | 4.0122392   | 2.27013935  | 1.74209985  | 1.74209985  | 3.345217117 | Up_in_Atg <sup>ΔΔ</sup> Fasted | Foxa3         |
| "Ahcy"          | 12.45592    | 9.577615    | 8.6915455   | 9.867935   | "Ahcy"          | 11.0167675  | 9.27974025  | 1.73702725  | 1.73702725  | 3.333475792 | Up_in_Atg <sup>ΔΔ</sup> Fasted | Ahcy          |
| "Keg1"          | 5.266463    | 1.9512166   | 1.8886093   | 1.8718053  | "Keg1"          | 3.6088398   | 1.8802073   | 1.7286325   | 1.7286325   | 3.314135295 | Up_in_Atg <sup>ΔΔ</sup> Fasted | Keg1          |
| "Gys2"          | 5.7561603   | 2.3003016   | 2.3063712   | 2.2939239  | "Gys2"          | 4.02823095  | 2.30014755  | 1.7280834   | 1.7280834   | 3.312874152 | Up_in_Atg <sup>ΔΔ</sup> Fasted | Gys2          |
| "Glyat"         | 6.304214    | 3.2019878   | 3.0960141   | 2.9987491  | "Glyat"         | 4.7531009   | 3.0473816   | 1.7057193   | 1.7057193   | 3.261915252 | Up_in_Atg <sup>ΔΔ</sup> Fasted | Glyat         |
| "Fcgr4"         | 5.67173     | 1.9270066   | 1.900078    | 2.2991858  | "Fcgr4"         | 3.7993683   | 2.0996319   | 1.6997364   | 1.6997364   | 3.248416001 | Up_in_Atg <sup>ΔΔ</sup> Fasted | Fcgr4         |
| "Tm7sf2"        | 7.2457557   | 4.4707108   | 4.608005    | 3.7276278  | "Tm7sf2"        | 5.85823325  | 4.1678164   | 1.69041685  | 1.69041685  | 3.227499451 | Up_in_Atg <sup>ΔΔ</sup> Fasted | Tm7sf2        |
| "Prodh2"        | 5.509754    | 2.2094154   | 2.1892684   | 2.1647112  | "Prodh2"        | 3.8595847   | 2.1769898   | 1.6825949   | 1.6825949   | 3.210048066 | Up_in_Atg <sup>ΔΔ</sup> Fasted | Prodh2        |
| "Avpr1a"        | 5.84603835  | 2.6514678   | 2.57807315  | 2.5602275  | "Avpr1a"        | 4.248753075 | 2.569150325 | 1.67960275  | 1.67960275  | 3.203397325 | Up_in_Atg <sup>ΔΔ</sup> Fasted | Avpr1a        |
| "Sko1b2"        | 5.902284775 | 2.757673325 | 2.695802475 | 2.60757275 | "Sko1b2"        | 4.32997905  | 2.651687613 | 1.678291438 | 1.678291438 | 3.200486975 | Up_in_Atg <sup>ΔΔ</sup> Fasted | Sko1b2        |
| "Pim1"          | 8.492477    | 8.0338518   | 6.3779173   | 6.79861935 | "Pim1"          | 8.2631644   | 6.588268325 | 1.674896075 | 1.674896075 | 3.192963531 | Up_in_Atg <sup>ΔΔ</sup> Fasted | Pim1          |
| "1810055G02Rik" | 7.275446    | 6.273464    | 5.1947556   | 5.0165615  | "1810055G02Rik" | 6.774455    | 5.10565855  | 1.66879645  | 1.66879645  | 3.179492377 | Up_in_Atg <sup>ΔΔ</sup> Fasted | 1810055G02Rik |
| "Pon1"          | 11.213334   | 3.3814592   | 6.790751    | 4.4697895  | "Pon1"          | 7.2973966   | 5.63027025  | 1.66712635  | 1.66712635  | 3.175813847 | Up_in_Atg <sup>ΔΔ</sup> Fasted | Pon1          |
| "Akr1c13"       | 7.325127    | 3.352342    | 3.6811702   | 3.6696217  | "Akr1c13"       | 5.3387345   | 3.67539595  | 1.66333855  | 1.66333855  | 3.167486674 | Up_in_Atg <sup>ΔΔ</sup> Fasted | Akr1c13       |
| "Slc16a7"       | 6.690667    | 3.019865    | 2.9178917   | 3.4705577  | "Slc16a7"       | 4.855266    | 3.1942247   | 1.6610413   | 1.6610413   | 3.162446996 | Up_in_Atg <sup>ΔΔ</sup> Fasted | Slc16a7       |
| "Tmem97"        | 6.453506    | 3.297173    | 3.2277377   | 3.213911   | "Tmem97"        | 4.8753395   | 3.22082435  | 1.65451515  | 1.65451515  | 3.148173714 | Up_in_Atg <sup>ΔΔ</sup> Fasted | Tmem97        |
| "Cyp39a1"       | 6.6527796   | 3.253154    | 3.4624262   | 3.1874776  | "Cyp39a1"       | 4.9529668   | 3.3249519   | 1.6280149   | 1.6280149   | 3.090874121 | Up_in_Atg <sup>ΔΔ</sup> Fasted | Cyp39a1       |
| "Slc15a3"       | 5.275285    | 2.0343876   | 2.0344188   | 2.022444   | "Slc15a3"       | 3.6548363   | 2.0284314   | 1.6264049   | 1.6264049   | 3.087426731 | Up_in_Atg <sup>ΔΔ</sup> Fasted | Slc15a3       |
| "Ift122"        | 4.6134243   | 4.4668818   | 3.071912    | 2.7588212  | "Ift122"        | 4.54015305  | 2.9153666   | 1.62478645  | 1.62478645  | 3.083965124 | Up_in_Atg <sup>ΔΔ</sup> Fasted | Ift122        |
| "Cela2a"        | 5.4829535   | 2.3849566   | 2.3328602   | 2.2889628  | "Cela2a"        | 3.93395505  | 2.3109115   | 1.62304355  | 1.62304355  | 3.080241677 | Up_in_Atg <sup>ΔΔ</sup> Fasted | Cela2a        |
| "Rcl1"          | 11.281338   | 7.3070064   | 7.9618177   | 7.4048753  | "Rcl1"          | 9.2941722   | 7.6833465   | 1.6108257   | 1.6108257   | 3.054265971 | Up_in_Atg <sup>ΔΔ</sup> Fasted | Rcl1          |
| "Hsd17b7"       | 4.2994258   | 3.54887675  | 2.33194205  | 2.30541585 | "Hsd17b7"       | 3.924151275 | 2.31867895  | 1.605472325 | 1.605472325 | 3.042953578 | Up_in_Atg <sup>ΔΔ</sup> Fasted | Hsd17b7       |
| "Krt77"         | 5.308249    | 2.186454    | 2.1591094   | 2.135974   | "Krt77"         | 3.7473515   | 2.1475417   | 1.5998098   | 1.5998098   | 3.031033506 | Up_in_Atg <sup>ΔΔ</sup> Fasted | Krt77         |
| "Lsr"           | 5.656089    | 2.196566    | 2.0919054   | 2.5634823  | "Lsr"           | 3.9263275   | 2.32769385  | 1.59863365  | 1.59863365  | 3.028563477 | Up_in_Atg <sup>ΔΔ</sup> Fasted | Lsr           |
| "Mpp3"          | 6.4598513   | 7.887103    | 5.4960732   | 5.6604347  | "Mpp3"          | 7.17347715  | 5.57825395  | 1.5952232   | 1.5952232   | 3.021412579 | Up_in_Atg <sup>ΔΔ</sup> Fasted | Mpp3          |

| Atg7 <sup>+/+/+</sup> :Fasted<br>vs.<br>Atg7 <sup>+/+/+</sup> :Fed<br>Comparison |                            |                               |                            |                                 |         | Atg7 <sup>+/+/+</sup> :Fasted<br>vs. Atg7 <sup>+/+/+</sup> :Fed<br>Comparison |           |           |           |             |             | Regulation is based on FC |                               | Gene List       | C>3 |
|----------------------------------------------------------------------------------|----------------------------|-------------------------------|----------------------------|---------------------------------|---------|-------------------------------------------------------------------------------|-----------|-----------|-----------|-------------|-------------|---------------------------|-------------------------------|-----------------|-----|
| Atg7 <sup>+/+/+</sup> :Fasted                                                    | Atg7 <sup>+/+/+</sup> :Fed | Atg7 <sup>+/+/+</sup> :Fasted | Atg7 <sup>+/+/+</sup> :Fed | Atg7 <sup>+/+/+</sup> :Fed:Male | Average | Average                                                                       | Average   | Diff      | Abs(Diff) | 2*Abs(Diff) |             |                           |                               |                 |     |
| "Ptx3"                                                                           | 5.0020556                  | 1.176764                      | 6.839525                   | 5.192368                        |         | "Ptx3"                                                                        | 4.090415  | 7.510102  | -3.425587 | 3.425587    | 10.745038   | 21.490076                 | Down in Atg7 <sup>+/+/+</sup> | FastedPtx3      |     |
| "Sobp"                                                                           | 4.8753347                  | 3.888049                      | 8.012357                   | 6.945806                        |         | "Sobp"                                                                        | 4.381699  | 7.479015  | -3.097381 | 3.097381    | 6.194762    | 12.389524                 | Down in Atg7 <sup>+/+/+</sup> | FastedSobp      |     |
| "Nr4a1"                                                                          | 8.460605                   | 1.611985                      | 10.643175                  | 10.842651                       |         | "Nr4a1"                                                                       | 7.788431  | 10.743183 | -2.954752 | 2.954752    | 5.909504    | 11.819008                 | Down in Atg7 <sup>+/+/+</sup> | FastedNr4a1     |     |
| "Myh3"                                                                           | 7.0050726                  | 4.3570604                     | 9.708744                   | 7.364139                        |         | "Myh3"                                                                        | 5.681066  | 8.536441  | -2.855375 | 2.855375    | 5.710741    | 11.421482                 | Down in Atg7 <sup>+/+/+</sup> | FastedMyh3      |     |
| "Oub2"                                                                           | 3.061379                   | 2.429452                      | 5.991627                   | 5.1015964                       |         | "Oub2"                                                                        | 2.695415  | 5.466115  | -2.851199 | 2.851199    | 5.702398    | 11.404796                 | Down in Atg7 <sup>+/+/+</sup> | FastedOub2      |     |
| "Atp4"                                                                           | 5.1213625                  | 4.552587                      | 8.091327                   | 8.545025                        |         | "Atp4"                                                                        | 5.538071  | 8.318147  | -2.781096 | 2.781096    | 5.562192    | 11.124384                 | Down in Atg7 <sup>+/+/+</sup> | FastedAtp4      |     |
| "Dbp"                                                                            | 9.190015                   | 6.2767081                     | 10.204364                  | 10.62769                        |         | "Dbp"                                                                         | 7.733598  | 10.41602  | -2.682626 | 2.682626    | 5.365252    | 10.730504                 | Down in Atg7 <sup>+/+/+</sup> | FastedDbp       |     |
| "Fasn"                                                                           | 7.0721493                  | 6.801363                      | 12.157335                  | 6.956215                        |         | "Fasn"                                                                        | 6.936751  | 9.561177  | -2.624426 | 2.624426    | 5.248852    | 10.497704                 | Down in Atg7 <sup>+/+/+</sup> | FastedFasn      |     |
| "Timp1"                                                                          | 2.6019633                  | 2.114706                      | 5.05206                    | 4.526263                        |         | "Timp1"                                                                       | 2.358319  | 4.789161  | -2.430795 | 2.430795    | 5.9192174   | 10.741219                 | Down in Atg7 <sup>+/+/+</sup> | FastedTimp1     |     |
| "Pparg1b"                                                                        | 6.7355504                  | 5.013755                      | 8.213069                   | 8.395962                        |         | "Pparg1b"                                                                     | 5.874625  | 8.304515  | -2.429890 | 2.429890    | 5.3884128   | 10.77629                  | Down in Atg7 <sup>+/+/+</sup> | FastedPparg1b   |     |
| "Kera"                                                                           | 3.7650248                  | 4.214164                      | 4.251913                   | 8.542464                        |         | "Kera"                                                                        | 3.999604  | 6.398190  | -2.398586 | 2.398586    | 4.797172    | 9.594344                  | Down in Atg7 <sup>+/+/+</sup> | FastedKera      |     |
| "Brad"                                                                           | 3.604628                   | 2.897283                      | 7.525733                   | 3.671507                        |         | "Brad"                                                                        | 3.250956  | 5.598362  | -2.347406 | 2.347406    | 5.0980519   | 10.23947                  | Down in Atg7 <sup>+/+/+</sup> | FastedBrad      |     |
| "Bhhhe40"                                                                        | 9.172012                   | 7.398168                      | 10.41009                   | 10.78708                        |         | "Bhhhe40"                                                                     | 8.285090  | 10.61408  | -2.328958 | 2.328958    | 5.04242397  | 10.741219                 | Down in Atg7 <sup>+/+/+</sup> | FastedBhhhe40   |     |
| "Rapsn"                                                                          | 5.312217                   | 3.362516                      | 7.054557                   | 5.980395                        |         | "Rapsn"                                                                       | 4.337368  | 6.511476  | -2.174180 | 2.174180    | 4.51319844  | 10.09417                  | Down in Atg7 <sup>+/+/+</sup> | FastedRapsn     |     |
| "Ift3"                                                                           | 5.7081366                  | 5.223637                      | 8.192405                   | 7.014896                        |         | "Ift3"                                                                        | 5.465888  | 7.606943  | -2.141065 | 2.141065    | 4.1086162   | 10.09417                  | Down in Atg7 <sup>+/+/+</sup> | FastedIft3      |     |
| "Stbd1"                                                                          | 8.120089                   | 7.287066                      | 10.68365                   | 8.952879                        |         | "Stbd1"                                                                       | 7.703775  | 9.818267  | -2.114489 | 2.114489    | 4.228978    | 10.09417                  | Down in Atg7 <sup>+/+/+</sup> | FastedStbd1     |     |
| "Kc15a2"                                                                         | 4.232915                   | 4.114495                      | 5.612394                   | 7.535948                        |         | "Kc15a2"                                                                      | 4.471322  | 6.581173  | -2.110391 | 2.110391    | 4.32003319  | 10.09417                  | Down in Atg7 <sup>+/+/+</sup> | FastedKc15a2    |     |
| "Chad"                                                                           | 3.4755544                  | 3.440839                      | 5.323287                   | 7.614661                        |         | "Chad"                                                                        | 3.458267  | 5.588498  | -2.130231 | 2.130231    | 4.317670502 | 10.09417                  | Down in Atg7 <sup>+/+/+</sup> | FastedChad      |     |
| "Chna1"                                                                          | 6.968927                   | 5.931846                      | 9.473573                   | 7.626371                        |         | "Chna1"                                                                       | 6.451088  | 8.549972  | -2.098835 | 2.098835    | 4.28376911  | 10.09417                  | Down in Atg7 <sup>+/+/+</sup> | FastedChna1     |     |
| "Tmnt2"                                                                          | 6.4968275                  | 4.833433                      | 9.10765                    | 6.401061                        |         | "Tmnt2"                                                                       | 5.665180  | 7.753050  | -2.087205 | 2.087205    | 4.25711092  | 10.09417                  | Down in Atg7 <sup>+/+/+</sup> | FastedTmnt2     |     |
| "Angpt6"                                                                         | 3.746392                   | 3.708129                      | 6.138817                   | 5.386169                        |         | "Angpt6"                                                                      | 3.726382  | 5.762493  | -2.036108 | 2.036108    | 4.13281456  | 10.09417                  | Down in Atg7 <sup>+/+/+</sup> | FastedAngpt6    |     |
| "Elovl6"                                                                         | 2.300318                   | 2.160642                      | 6.287335                   | 2.2177995                       |         | "Elovl6"                                                                      | 2.22048   | 4.262567  | -2.040087 | 2.040087    | 4.08959796  | 10.09417                  | Down in Atg7 <sup>+/+/+</sup> | FastedElovl6    |     |
| "Krcs"                                                                           | 5.930448                   | 4.490984                      | 7.336387                   | 7.155738                        |         | "Krcs"                                                                        | 5.215716  | 7.247713  | -2.031997 | 2.031997    | 4.0870661   | 10.09417                  | Down in Atg7 <sup>+/+/+</sup> | FastedKrcs      |     |
| "Hes1"                                                                           | 4.131781                   | 3.981641                      | 6.315863                   | 6.042834                        |         | "Hes1"                                                                        | 4.149561  | 6.179362  | -2.029805 | 2.029805    | 4.03848175  | 10.09417                  | Down in Atg7 <sup>+/+/+</sup> | FastedHes1      |     |
| "Tob1"                                                                           | 10.724378                  | 9.53468                       | 11.964973                  | 12.279396                       |         | "Tob1"                                                                        | 10.130429 | 12.122185 | -1.991755 | 1.991755    | 3.97206583  | 10.09417                  | Down in Atg7 <sup>+/+/+</sup> | FastedTob1      |     |
| "Grem2"                                                                          | 3.981786                   | 3.829927                      | 6.539128                   | 5.146892                        |         | "Grem2"                                                                       | 3.905806  | 5.843015  | -1.937149 | 1.937149    | 3.874268    | 10.09417                  | Down in Atg7 <sup>+/+/+</sup> | FastedGrem2     |     |
| "Mef2c"                                                                          | 10.291164                  | 8.974721                      | 11.260518                  | 11.860926                       |         | "Mef2c"                                                                       | 9.633412  | 11.563979 | -1.930567 | 1.930567    | 3.861134    | 10.09417                  | Down in Atg7 <sup>+/+/+</sup> | FastedMef2c     |     |
| "Pparg3"                                                                         | 7.101783                   | 6.471962                      | 8.604763                   | 8.11465                         |         | "Pparg3"                                                                      | 6.788729  | 8.708114  | -1.921411 | 1.921411    | 3.78748249  | 10.09417                  | Down in Atg7 <sup>+/+/+</sup> | FastedPparg3    |     |
| "Tnfrap2"                                                                        | 5.137625                   | 4.400875                      | 7.353422                   | 6.056088                        |         | "Tnfrap2"                                                                     | 4.788970  | 6.704765  | -1.915796 | 1.915796    | 3.7722361   | 10.09417                  | Down in Atg7 <sup>+/+/+</sup> | FastedTnfrap2   |     |
| "Rarb"                                                                           | 3.706945                   | 2.613428                      | 4.85435                    | 5.287526                        |         | "Rarb"                                                                        | 3.160187  | 5.071005  | -1.910819 | 1.910819    | 3.760418162 | 10.09417                  | Down in Atg7 <sup>+/+/+</sup> | FastedRarb      |     |
| "Exd2"                                                                           | 4.967594                   | 4.629907                      | 6.608036                   | 6.704412                        |         | "Exd2"                                                                        | 4.798705  | 6.656238  | -1.857473 | 1.857473    | 3.6217426   | 10.09417                  | Down in Atg7 <sup>+/+/+</sup> | FastedExd2      |     |
| "Bex1"                                                                           | 6.681765                   | 4.753737                      | 11.09015                   | 10.59078                        |         | "Bex1"                                                                        | 9.213751  | 11.054895 | -1.841147 | 1.841147    | 3.682294    | 10.09417                  | Down in Atg7 <sup>+/+/+</sup> | FastedBex1      |     |
| "Ilgp1"                                                                          | 6.938278                   | 6.575245                      | 9.405667                   | 7.787009                        |         | "Ilgp1"                                                                       | 6.756715  | 8.596387  | -1.839687 | 1.839687    | 3.57905246  | 10.09417                  | Down in Atg7 <sup>+/+/+</sup> | FastedIlgp1     |     |
| "Crym"                                                                           | 4.039137                   | 3.985727                      | 5.485463                   | 6.182392                        |         | "Crym"                                                                        | 4.014324  | 5.836395  | -1.823075 | 1.823075    | 3.64100822  | 10.09417                  | Down in Atg7 <sup>+/+/+</sup> | FastedCrym      |     |
| "Ilgp2"                                                                          | 6.268766                   | 6.186236                      | 8.38538                    | 7.243036                        |         | "Ilgp2"                                                                       | 6.227495  | 8.050948  | -1.823463 | 1.823463    | 3.539256447 | 10.09417                  | Down in Atg7 <sup>+/+/+</sup> | FastedIlgp2     |     |
| "B3galnt2"                                                                       | 8.336799                   | 8.991085                      | 10.03121                   | 11.354785                       |         | "B3galnt2"                                                                    | 8.367954  | 10.191475 | -1.823307 | 1.823307    | 3.59120173  | 10.09417                  | Down in Atg7 <sup>+/+/+</sup> | FastedB3galnt2  |     |
| "Cpne2"                                                                          | 5.420855                   | 5.245511                      | 8.524973                   | 5.792563                        |         | "Cpne2"                                                                       | 5.333182  | 7.152146  | -1.818926 | 1.818926    | 3.51781456  | 10.09417                  | Down in Atg7 <sup>+/+/+</sup> | FastedCpne2     |     |
| "Sel13"                                                                          | 6.7963424                  | 6.340561                      | 8.307714                   | 8.465468                        |         | "Sel13"                                                                       | 6.568517  | 8.386681  | -1.818229 | 1.818229    | 3.52648018  | 10.09417                  | Down in Atg7 <sup>+/+/+</sup> | FastedSel13     |     |
| "Ugt8a"                                                                          | 6.801850                   | 3.542192                      | 6.982453                   | 6.783774                        |         | "Ugt8a"                                                                       | 5.078047  | 6.883117  | -1.805079 | 1.805079    | 3.49448281  | 10.09417                  | Down in Atg7 <sup>+/+/+</sup> | FastedUgt8a     |     |
| "Twist1"                                                                         | 4.424971                   | 4.454975                      | 6.953993                   | 6.157517                        |         | "Twist1"                                                                      | 4.306833  | 6.134842  | -1.797665 | 1.797665    | 3.472728757 | 10.09417                  | Down in Atg7 <sup>+/+/+</sup> | FastedTwist1    |     |
| "Cdc88c"                                                                         | 4.589007                   | 5.555307                      | 6.575214                   | 6.915692                        |         | "Cdc88c"                                                                      | 4.972267  | 6.743436  | -1.771129 | 1.771129    | 3.41313437  | 10.09417                  | Down in Atg7 <sup>+/+/+</sup> | FastedCdc88c    |     |
| "Sin"                                                                            | 8.832644                   | 7.082613                      | 11.319609                  | 3.006064                        |         | "Sin"                                                                         | 7.957628  | 9.710105  | -1.752478 | 1.752478    | 3.38937683  | 10.09417                  | Down in Atg7 <sup>+/+/+</sup> | FastedSin       |     |
| "Smtn"                                                                           | 5.2305684                  | 4.103605                      | 6.590213                   | 6.238313                        |         | "Smtn"                                                                        | 4.667086  | 6.414283  | -1.747196 | 1.747196    | 3.35708498  | 10.09417                  | Down in Atg7 <sup>+/+/+</sup> | FastedSmtn      |     |
| "H19"                                                                            | 11.152601                  | 10.067596                     | 12.95359                   | 11.752854                       |         | "H19"                                                                         | 10.610085 | 12.353105 | -1.743008 | 1.743008    | 3.34732332  | 10.09417                  | Down in Atg7 <sup>+/+/+</sup> | FastedH19       |     |
| "Wf1"                                                                            | 3.4197614                  | 3.352952                      | 5.025149                   | 7.182758                        |         | "Wf1"                                                                         | 3.386783  | 5.130966  | -1.743183 | 1.743183    | 3.28866103  | 10.09417                  | Down in Atg7 <sup>+/+/+</sup> | FastedWf1       |     |
| "Ank1"                                                                           | 6.0057544                  | 4.981414                      | 7.207403                   | 7.207363                        |         | "Ank1"                                                                        | 5.494042  | 7.209245  | -1.714907 | 1.714907    | 3.2828929   | 10.09417                  | Down in Atg7 <sup>+/+/+</sup> | FastedAnk1      |     |
| "Casp2"                                                                          | 9.07558                    | 6.82962                       | 9.85362                    | 9.480692                        |         | "Casp2"                                                                       | 7.954125  | 9.667162  | -1.713037 | 1.713037    | 3.27892511  | 10.09417                  | Down in Atg7 <sup>+/+/+</sup> | FastedCasp2     |     |
| "Pdkc"                                                                           | 7.4016478                  | 6.310511                      | 8.112915                   | 9.027907                        |         | "Pdkc"                                                                        | 6.858349  | 8.570416  | -1.712062 | 1.712062    | 3.40673991  | 10.09417                  | Down in Atg7 <sup>+/+/+</sup> | FastedPdkc      |     |
| "Myog"                                                                           | 5.726863                   | 3.671043                      | 8.26395                    | 4.543793                        |         | "Myog"                                                                        | 4.689336  | 6.403855  | -1.704922 | 1.704922    | 3.30161306  | 10.09417                  | Down in Atg7 <sup>+/+/+</sup> | FastedMyog      |     |
| "Sko5a1"                                                                         | 6.928694                   | 5.604145                      | 7.929003                   | 8.009219                        |         | "Sko5a1"                                                                      | 6.266419  | 7.969111  | -1.702691 | 1.702691    | 3.25056764  | 10.09417                  | Down in Atg7 <sup>+/+/+</sup> | FastedSko5a1    |     |
| "Rarg"                                                                           | 5.93876                    | 5.198483                      | 7.372661                   | 8.096797                        |         | "Rarg"                                                                        | 6.086541  | 7.774529  | -1.687988 | 1.687988    | 3.31304061  | 10.09417                  | Down in Atg7 <sup>+/+/+</sup> | FastedRarg      |     |
| "Synp2"                                                                          | 8.193169                   | 6.039958                      | 8.46545                    | 6.060128                        |         | "Synp2"                                                                       | 7.116163  | 8.772917  | -1.656747 | 1.656747    | 3.37067107  | 10.09417                  | Down in Atg7 <sup>+/+/+</sup> | FastedSynp2     |     |
| "D1fnd622e"                                                                      | 5.1594005                  | 5.142287                      | 6.495427                   | 7.110549                        |         | "D1fnd622e"                                                                   | 5.149113  | 6.802868  | -1.653875 | 1.653875    | 3.36622428  | 10.09417                  | Down in Atg7 <sup>+/+/+</sup> | FastedD1fnd622e |     |
| "Them4"                                                                          | 4.5732                     | 3.845124                      | 5.30163                    | 6.420327                        |         | "Them4"                                                                       | 4.209167  | 5.862593  | -1.653426 | 1.653426    | 3.34581245  | 10.09417                  | Down in Atg7 <sup>+/+/+</sup> | FastedThem4     |     |
| "Hspb3"                                                                          | 8.312609                   | 7.44051                       | 9.704321                   | 9.331363                        |         | "Hspb3"                                                                       | 7.87333   | 9.518142  | -1.644812 | 1.644812    | 3.27070152  | 10.09417                  | Down in Atg7 <sup>+/+/+</sup> | FastedHspb3     |     |
| "Ptpns"                                                                          | 5.0449824                  | 4.451969                      | 6.718304                   | 6.592531                        |         | "Ptpns"                                                                       | 4.748475  | 6.385415  | -1.       |             |             |                           |                               |                 |     |

|                 |             |             |             |             |                 |             |             |             |             |             |                           |        |               |
|-----------------|-------------|-------------|-------------|-------------|-----------------|-------------|-------------|-------------|-------------|-------------|---------------------------|--------|---------------|
| "Usp3"          | 7.01614515  | 8.10344485  | 5.49598615  | 5.10059125  | "Usp3"          | 7.559796825 | 5.2982797   | 2.261517125 | 2.261517125 | 4.794954499 | Up in Atg7 <sup>mtm</sup> | Fasted | Usp3          |
| "CebpD"         | 8.9087015   | 8.9844008   | 6.7449021   | 6.63684523  | "CebpD"         | 8.94655115  | 6.690874125 | 2.255677025 | 2.255677025 | 4.775585323 | Up in Atg7 <sup>mtm</sup> | Fasted | CebpD         |
| "120003110RIK"  | 11.56526    | 12.86479    | 10.455991   | 9.577624    | "120003110RIK"  | 12.2150285  | 9.9675775   | 2.253421    | 2.253421    | 4.768121304 | Up in Atg7 <sup>mtm</sup> | Fasted | 120003110RIK  |
| "Bach2"         | 8.7391924   | 8.17221     | 6.333387    | 6.007093    | "Bach2"         | 8.3395373   | 6.0950426   | 2.2494302   | 2.2494302   | 4.759040426 | Up in Atg7 <sup>mtm</sup> | Fasted | Bach2         |
| "Tmem37"        | 8.8552595   | 8.798541    | 6.7180024   | 6.173768    | "Tmem37"        | 8.69152025  | 6.44559302  | 2.24599005  | 2.24599005  | 4.746352582 | Up in Atg7 <sup>mtm</sup> | Fasted | Tmem37        |
| "Ankrd33b"      | 9.056035    | 9.661626    | 7.280679    | 6.953147    | "Ankrd33b"      | 9.3588305   | 7.11691335  | 2.24191715  | 2.24191715  | 4.730252348 | Up in Atg7 <sup>mtm</sup> | Fasted | Ankrd33b      |
| "Msc"           | 5.623186    | 6.414942    | 3.806379    | 3.724142    | "Msc"           | 6.019064    | 3.7793966   | 2.2396674   | 2.2396674   | 4.722881703 | Up in Atg7 <sup>mtm</sup> | Fasted | Msc           |
| "Hmgb2"         | 8.034521    | 9.035357    | 6.04751625  | 6.5730635   | "Hmgb2"         | 8.534939    | 6.31028875  | 2.224649125 | 2.224649125 | 4.67972109  | Up in Atg7 <sup>mtm</sup> | Fasted | Hmgb2         |
| "Tmem140"       | 10.891435   | 12.096087   | 8.553862    | 9.289149    | "Tmem140"       | 11.491761   | 9.2711055   | 2.202555    | 2.202555    | 4.659759512 | Up in Atg7 <sup>mtm</sup> | Fasted | Tmem140       |
| "Cyp12"         | 2.637232    | 7.561367    | 3.173387    | 2.6502625   | "Cyp12"         | 5.0290451   | 2.8521026   | 2.208485    | 2.208485    | 4.616640401 | Up in Atg7 <sup>mtm</sup> | Fasted | Cyp12         |
| "Zranb1"        | 11.02450033 | 11.215289   | 8.472113    | 9.37052833  | "Zranb1"        | 11.11989467 | 8.921320667 | 2.198574    | 2.198574    | 4.590254042 | Up in Atg7 <sup>mtm</sup> | Fasted | Zranb1        |
| "Igfbp3"        | 10.00934    | 10.74151    | 8.694755    | 7.684231    | "Igfbp3"        | 10.375425   | 8.189493    | 2.185932    | 2.185932    | 4.550206437 | Up in Atg7 <sup>mtm</sup> | Fasted | Igfbp3        |
| "Cd37"          | 2.4089236   | 6.294243    | 2.143429    | 2.1914976   | "Cd37"          | 4.3515833   | 2.1674633   | 2.18412     | 2.18412     | 4.544495004 | Up in Atg7 <sup>mtm</sup> | Fasted | Cd37          |
| "Snhg5"         | 9.370475    | 10.139088   | 7.052657    | 8.089015    | "Snhg5"         | 9.7547815   | 7.5708405   | 2.18394115  | 2.18394115  | 4.543931701 | Up in Atg7 <sup>mtm</sup> | Fasted | Snhg5         |
| "Ch3b3"         | 2.5439851   | 7.4062065   | 2.96291205  | 2.6275166   | "Ch3b3"         | 4.9777958   | 2.97218825  | 2.182578975 | 2.182578975 | 4.539637107 | Up in Atg7 <sup>mtm</sup> | Fasted | Ch3b3         |
| "Pou2af1"       | 2.4231772   | 6.852175    | 2.41664     | 2.508911    | "Pou2af1"       | 4.6376761   | 2.4632325   | 2.1744506   | 2.1744506   | 4.53143824  | Up in Atg7 <sup>mtm</sup> | Fasted | Pou2af1       |
| "Arnt1"         | 7.3392076   | 9.151973    | 6.0052867   | 6.1767206   | "Arnt1"         | 8.2455903   | 6.09100365  | 2.15458665  | 2.15458665  | 4.452410619 | Up in Atg7 <sup>mtm</sup> | Fasted | Arnt1         |
| "Sic39a14"      | 4.5467178   | 6.32378965  | 3.431748    | 3.1332572   | "Sic39a14"      | 5.435253725 | 3.2825026   | 2.152751125 | 2.152751125 | 4.446749468 | Up in Atg7 <sup>mtm</sup> | Fasted | Sic39a14      |
| "Cyp2e1"        | 12.4130945  | 13.219002   | 1.166973    | 9.65422     | "Cyp2e1"        | 12.80749825 | 10.6824975  | 2.12500075  | 2.12500075  | 4.362033198 | Up in Atg7 <sup>mtm</sup> | Fasted | Cyp2e1        |
| "Rusc2"         | 7.011308    | 7.82607485  | 5.62402915  | 4.9718848   | "Rusc2"         | 7.418802825 | 5.297956975 | 2.12084585  | 2.12084585  | 4.349488802 | Up in Atg7 <sup>mtm</sup> | Fasted | Rusc2         |
| "Ccd4"          | 2.0968397   | 6.9901101   | 2.946736    | 2.174885    | "Ccd4"          | 4.2433575   | 2.1365081   | 2.10706485  | 2.10706485  | 4.308145126 | Up in Atg7 <sup>mtm</sup> | Fasted | Ccd4          |
| "Err11"         | 9.480609    | 10.792747   | 8.5068984   | 7.5796792   | "Err11"         | 10.136678   | 8.0432888   | 2.0933892   | 2.0933892   | 4.267494222 | Up in Atg7 <sup>mtm</sup> | Fasted | Err11         |
| "Tbcd1d5"       | 9.2393621   | 10.43155933 | 7.63147933  | 7.85395833  | "Tbcd1d5"       | 9.835460717 | 7.742803133 | 2.092657583 | 2.092657583 | 4.265330648 | Up in Atg7 <sup>mtm</sup> | Fasted | Tbcd1d5       |
| "Nfil3"         | 8.143019    | 9.518965    | 7.1216507   | 6.3560495   | "Nfil3"         | 8.830992    | 6.7388051   | 2.0921419   | 2.0921419   | 4.263806301 | Up in Atg7 <sup>mtm</sup> | Fasted | Nfil3         |
| "Sic7a2"        | 6.738791933 | 6.556110033 | 4.39520267  | 4.7706011   | "Sic7a2"        | 6.647450983 | 4.582920233 | 2.06454895  | 2.06454895  | 4.183031755 | Up in Atg7 <sup>mtm</sup> | Fasted | Sic7a2        |
| "Nappa"         | 2.8484654   | 6.5164145   | 2.813242    | 2.5025157   | "Nappa"         | 4.54993995  | 2.49188795  | 2.058052    | 2.058052    | 4.164236482 | Up in Atg7 <sup>mtm</sup> | Fasted | Nappa         |
| "Sng1"          | 8.3290424   | 8.90769314  | 6.5185309   | 6.61610482  | "Sng1"          | 8.453295474 | 6.56482785  | 2.0545474   | 2.0545474   | 4.151304448 | Up in Atg7 <sup>mtm</sup> | Fasted | Sng1          |
| "Cabels1"       | 4.457598    | 7.097991    | 4.182976    | 3.3660916   | "Cabels1"       | 5.7779855   | 3.7245338   | 2.0534517   | 2.0534517   | 4.150979192 | Up in Atg7 <sup>mtm</sup> | Fasted | Cabels1       |
| "Sdc4"          | 8.77726165  | 9.994045    | 7.66781325  | 7.00064     | "Sdc4"          | 9.385638075 | 7.334226625 | 2.0514145   | 2.0514145   | 4.145113053 | Up in Atg7 <sup>mtm</sup> | Fasted | Sdc4          |
| "Perp"          | 6.5719852   | 7.115221    | 5.5414085   | 4.050685    | "Perp"          | 6.8436031   | 4.79604675  | 2.04755635  | 2.04755635  | 4.134051468 | Up in Atg7 <sup>mtm</sup> | Fasted | Perp          |
| "Ifz4ak4"       | 6.596833    | 8.566059    | 5.313826    | 5.7503143   | "Ifz4ak4"       | 7.581446    | 5.54108015  | 2.04036585  | 2.04036585  | 4.113498061 | Up in Atg7 <sup>mtm</sup> | Fasted | Ifz4ak4       |
| "Mda1"          | 2.6148975   | 6.7544796   | 2.600775    | 2.4871393   | "Mda1"          | 4.682980175 | 2.6413984   | 2.039013775 | 2.039013775 | 4.109966272 | Up in Atg7 <sup>mtm</sup> | Fasted | Mda1          |
| "Lnc"           | 6.1974862   | 6.13208     | 1.970471    | 2.4901849   | "Lnc"           | 4.0534741   | 2.0160707   | 2.03746685  | 2.03746685  | 4.107310805 | Up in Atg7 <sup>mtm</sup> | Fasted | Lnc           |
| "Enc1"          | 6.9718595   | 6.9524655   | 5.062004    | 4.79037035  | "Enc1"          | 6.9621625   | 4.92623175  | 2.035930325 | 2.035930325 | 4.100870895 | Up in Atg7 <sup>mtm</sup> | Fasted | Enc1          |
| "Ulk1"          | 7.38240285  | 8.15956125  | 5.5933275   | 5.89336865  | "Ulk1"          | 7.770982025 | 5.7436295   | 2.0276191   | 2.0276191   | 4.077314098 | Up in Atg7 <sup>mtm</sup> | Fasted | Ulk1          |
| "Cdc77"         | 5.729317    | 6.469391967 | 3.920087167 | 4.2213953   | "Cdc77"         | 6.083124483 | 4.070741233 | 2.01238325  | 2.01238325  | 4.03481432  | Up in Atg7 <sup>mtm</sup> | Fasted | Cdc77         |
| "Lrrc58"        | 11.705037   | 12.701495   | 10.09689    | 10.558324   | "Lrrc58"        | 12.336016   | 10.327607   | 2.008409    | 2.008409    | 4.023382778 | Up in Atg7 <sup>mtm</sup> | Fasted | Lrrc58        |
| "Sic22a8"       | 6.509806    | 6.509806    | 4.04293     | 4.4259575   | "Sic22a8"       | 6.2552541   | 4.24605905  | 2.0065905   | 2.0065905   | 4.016849482 | Up in Atg7 <sup>mtm</sup> | Fasted | Sic22a8       |
| "Zwint"         | 6.70953967  | 8.67647505  | 5.91936267  | 5.5172915   | "Zwint"         | 7.723714508 | 5.718327158 | 2.00538735  | 2.00538735  | 4.019466829 | Up in Atg7 <sup>mtm</sup> | Fasted | Zwint         |
| "Plac8"         | 5.9560413   | 7.103846    | 5.9281858   | 3.1258373   | "Plac8"         | 6.52994365  | 4.52699805  | 2.0029456   | 2.0029456   | 4.00871528  | Up in Atg7 <sup>mtm</sup> | Fasted | Plac8         |
| "Zfp410"        | 8.1144395   | 9.638446    | 6.53538     | 7.3239967   | "Zfp410"        | 8.87644275  | 6.88417485  | 1.9922679   | 1.9922679   | 3.978619412 | Up in Atg7 <sup>mtm</sup> | Fasted | Zfp410        |
| "Tacc2"         | 13.953499   | 14.070963   | 1.1825264   | 1.225948    | "Tacc2"         | 14.012456   | 1.0250606   | 1.98685     | 1.98685     | 3.963706517 | Up in Atg7 <sup>mtm</sup> | Fasted | Tacc2         |
| "Ilgk-V28"      | 2.449121817 | 6.59168583  | 2.581149583 | 2.5217174   | "Ilgk-V28"      | 4.52040385  | 2.55143492  | 1.968970358 | 1.968970358 | 3.914886165 | Up in Atg7 <sup>mtm</sup> | Fasted | Ilgk-V28      |
| "Atp6v1l1"      | 9.112111    | 10.445725   | 6.4846314   | 7.4784053   | "Atp6v1l1"      | 9.819456    | 7.85725905  | 1.9623815   | 1.9623815   | 3.89648696  | Up in Atg7 <sup>mtm</sup> | Fasted | Atp6v1l1      |
| "Apos3"         | 7.5412645   | 7.3634834   | 5.431425    | 5.5777063   | "Apos3"         | 7.45237395  | 5.5057244   | 1.94664955  | 1.94664955  | 3.854782739 | Up in Atg7 <sup>mtm</sup> | Fasted | Apos3         |
| "Irfd1"         | 11.214171   | 11.768001   | 9.44837     | 9.647775    | "Irfd1"         | 11.491086   | 9.5480725   | 1.9430135   | 1.9430135   | 3.845079694 | Up in Atg7 <sup>mtm</sup> | Fasted | Irfd1         |
| "1200015M12RIK" | 11.476117   | 12.903803   | 10.639029   | 9.864451    | "1200015M12RIK" | 12.18996    | 10.251474   | 1.93822     | 1.93822     | 3.832325229 | Up in Atg7 <sup>mtm</sup> | Fasted | 1200015M12RIK |
| "Sic7a8"        | 5.5374103   | 6.8404207   | 3.929574    | 4.5734945   | "Sic7a8"        | 6.1889155   | 4.25146345  | 1.93745205  | 1.93745205  | 3.830258516 | Up in Atg7 <sup>mtm</sup> | Fasted | Sic7a8        |
| "Gmmt"          | 6.446552    | 5.0305714   | 3.8573117   | 3.951122    | "Gmmt"          | 5.8383567   | 3.90521685  | 1.93331985  | 1.93331985  | 3.81933072  | Up in Atg7 <sup>mtm</sup> | Fasted | Gmmt          |
| "Cst"           | 13.342536   | 13.93849    | 11.814678   | 11.573288   | "Cst"           | 14.3137225  | 11.6498965  | 1.932804    | 1.932804    | 3.81765325  | Up in Atg7 <sup>mtm</sup> | Fasted | Cst           |
| "Cd22"          | 2.2614005   | 6.148775    | 2.261417    | 2.3105009   | "Cd22"          | 4.2058775   | 2.2863213   | 1.91876645  | 1.91876645  | 3.780969333 | Up in Atg7 <sup>mtm</sup> | Fasted | Cd22          |
| "Ptpn22"        | 2.5419314   | 6.4239044   | 5.2383368   | 2.5987537   | "Ptpn22"        | 4.4829179   | 2.5685425   | 1.91437265  | 1.91437265  | 3.76948636  | Up in Atg7 <sup>mtm</sup> | Fasted | Ptpn22        |
| "Fcna"          | 6.7425965   | 8.128116    | 6.948106    | 5.1978736   | "Fcna"          | 7.98535625  | 6.0729291   | 1.91236415  | 1.91236415  | 3.746254444 | Up in Atg7 <sup>mtm</sup> | Fasted | Fcna          |
| "Plin5"         | 9.305935    | 8.450001    | 6.4074077   | 7.5424104   | "Plin5"         | 8.877968    | 6.97472905  | 1.90323895  | 1.90323895  | 3.740520273 | Up in Atg7 <sup>mtm</sup> | Fasted | Plin5         |
| "Serpina3n"     | 5.286792    | 6.175949    | 4.2172065   | 3.4480371   | "Serpina3n"     | 5.7327035   | 3.8326218   | 1.8997487   | 1.8997487   | 3.731481931 | Up in Atg7 <sup>mtm</sup> | Fasted | Serpina3n     |
| "Mccs"          | 9.6316207   | 7.625332    | 5.387621    | 4.7959749   | "Mccs"          | 6.98847635  | 5.0915      | 1.8846465   | 1.8846465   | 3.72791021  | Up in Atg7 <sup>mtm</sup> | Fasted | Mccs          |
| "Ctdp1"         | 7.359736    | 8.379776    | 5.8913083   | 6.063426    | "Ctdp1"         | 7.869756    | 5.97736715  | 1.89238885  | 1.89238885  | 3.712494401 | Up in Atg7 <sup>mtm</sup> | Fasted | Ctdp1         |
| "Rbp7"          | 7.5204244   | 9.614858    | 7.169958    | 6.2015305   | "Rbp7"          | 8.5676412   | 6.68574425  | 1.88189695  | 1.88189695  | 3.685593478 | Up in Atg7 <sup>mtm</sup> | Fasted | Rbp7          |
| "Hectd1"        | 12.269155   | 13.327801   | 10.711885   | 1.126732    | "Hectd1"        | 12.798478   | 10.9193085  | 1.8791695   | 1.8791695   | 3.678632356 | Up in Atg7 <sup>mtm</sup> | Fasted | Hectd1        |
| "Lyd6"          | 2.39458     | 6.2194223   | 2.394661    | 2.4650297   | "Lyd6"          | 4.30700115  | 2.42984535  | 1.8771558   | 1.8771558   | 3.675031398 | Up in Atg7 <sup>mtm</sup> | Fasted | Lyd6          |
| "Wnt2"          | 12.756849   | 12.591182   | 12.867736   | 9.337515    | "Wnt2"          | 12.4740158  | 10.8636255  | 1.871182    | 1.871182    | 3.671479    | Up in Atg7 <sup>mtm</sup> | Fasted | Wnt2          |
| "231008DH04RIK" | 4.771492    | 5.998803    | 3.661934    | 3.37071     | "231008DH04RIK" | 5.38651075  | 3.516147    | 1.87018705  | 1.87018705  | 3.655797256 | Up in Atg7 <sup>mtm</sup> | Fasted | 231008DH04RIK |
| "Glul"          | 12.6140955  | 13.1682165  | 11.2069095  | 10.875191   | "Glul"          | 12.891156   | 11.03794075 | 1.85321525  | 1.85321525  | 3.613045066 | Up in Atg7 <sup>mtm</sup> | Fasted | Glul          |
| "Sell"          | 2.08562255  | 5.78826715  | 2.0419105   | 2.1294185   | "Sell"          | 3.93694485  | 2.08566175  | 1.851279675 | 1.851279675 | 3.608200917 | Up in Atg7 <sup>mtm</sup> | Fasted | Sell          |
| "Ehnhad"        | 6.4732475   | 8.657623    | 6.127118    | 5.3027997   | "Ehnhad"        | 7.56543525  | 5.71495885  | 1.8504764   | 1.8504764   | 3.606192474 | Up in Atg7 <sup>mtm</sup> | Fasted | Ehnhad        |
| "Ell"           | 6.75333     | 7.793158    | 5.2686245   | 5.5984654   | "Ell"           | 7.273244    | 5.43414495  | 1.83909905  | 1.83909905  | 3.577865241 | Up in Atg7 <sup>mtm</sup> | Fasted | Ell           |
| "Irf4"          | 4.207275    | 5.445432    | 3.54061472  | 4.4784053   | "Irf4"          | 4.99567075  | 4.82464982  | 1.826486001 | 1.826486001 | 3.568268001 | Up in Atg7 <sup>mtm</sup> | Fasted | Irf4          |
| "Tlgap"         | 9.12607667  | 11.377563   | 8.370359    | 8.841734567 | "Tlgap"         | 10.2518353  | 8.42606783  | 1.82580855  | 1.82580855  | 3.545056326 | Up in Atg7                |        |               |

|           |           |           |          |          |  |           |            |          |           |           |             |                                   |         |
|-----------|-----------|-----------|----------|----------|--|-----------|------------|----------|-----------|-----------|-------------|-----------------------------------|---------|
| "Procr"   | 9.509192  | 10.236461 | 8.007016 | 8.521716 |  | "Procr"   | 9.8728265  | 8.264366 | 1.6084605 | 1.6084605 | 3.049262813 | Up_in_Atg7 <sup>phox</sup> Fasted | Procr   |
| "Gm10052" | 10.630951 | 11.31341  | 9.286078 | 9.466126 |  | "Gm10052" | 10.9721805 | 9.376102 | 1.5960785 | 1.5960785 | 3.023204351 | Up_in_Atg7 <sup>phox</sup> Fasted | Gm10052 |

[illegible]

|              |             |             |             |             |              |             |             |              |             |             |                            |        |              |
|--------------|-------------|-------------|-------------|-------------|--------------|-------------|-------------|--------------|-------------|-------------|----------------------------|--------|--------------|
| Ccl21a       | 6.697652    | 5.830972    | 8.424284    | 7.799827    | Ccl21a       | 6.264312    | 8.0763335   | -1.84332135  | 1.84332135  | 3.588351829 | Down_in_Attr <sup>63</sup> | Fasted | Ccl21a       |
| Grb14        | 7.1270924   | 5.0957937   | 7.827379    | 8.075798    | Grb14        | 6.1144305   | 7.9506685   | -1.83922545  | 1.83922545  | 3.578178726 | Down_in_Attr <sup>63</sup> | Fasted | Grb14        |
| Mml1         | 5.989954    | 4.014795    | 6.3021274   | 6.4840117   | Mml1         | 4.5568745   | 6.39306955  | -1.83619505  | 1.83619505  | 3.570670602 | Down_in_Attr <sup>63</sup> | Fasted | Mml1         |
| Mypc         | 8.628144    | 7.3914903   | 10.340107   | 8.333701    | Mypc         | 8.01091715  | 8.3479001   | -1.83608685  | 1.83608685  | 3.570402817 | Down_in_Attr <sup>63</sup> | Fasted | Mypc         |
| Empl1        | 7.0459256   | 6.40929     | 7.216339    | 8.559139    | Empl1        | 7.0569428   | 8.887739    | -1.8307962   | 1.8307962   | 3.557331418 | Down_in_Attr <sup>63</sup> | Fasted | Empl1        |
| Htgb1        | 5.8142285   | 5.9028087   | 8.328267    | 7.0387383   | Htgb1        | 5.8585186   | 7.68350265  | -1.82498405  | 1.82498405  | 3.543030906 | Down_in_Attr <sup>63</sup> | Fasted | Htgb1        |
| Sfrp4        | 5.8659096   | 5.9307246   | 9.0766      | 6.3688827   | Sfrp4        | 5.8983576   | 7.72274135  | -1.82438375  | 1.82438375  | 3.54155697  | Down_in_Attr <sup>63</sup> | Fasted | Sfrp4        |
| Syp12        | 8.882413    | 8.308615    | 10.510688   | 7.321905    | Syp12        | 8.595514    | 10.4159865  | -1.8204725   | 1.8204725   | 3.531968558 | Down_in_Attr <sup>63</sup> | Fasted | Syp12        |
| Fap          | 6.467065    | 5.244766    | 7.990406    | 7.3318157   | Fap          | 5.8559155   | 7.66561085  | -1.80969535  | 1.80969535  | 3.505682522 | Down_in_Attr <sup>63</sup> | Fasted | Fap          |
| Bcl6         | 5.79156505  | 5.76760935  | 7.88155325  | 7.28888585  | Bcl6         | 5.7796327   | 7.58219345  | -1.80558675  | 1.80558675  | 3.495713015 | Down_in_Attr <sup>63</sup> | Fasted | Bcl6         |
| Meo2         | 5.998514    | 6.2318585   | 7.730675    | 5.952555    | Meo2         | 6.335849925 | 8.137707125 | -1.8019472   | 1.8019472   | 3.48695341  | Down_in_Attr <sup>63</sup> | Fasted | Meo2         |
| Cond2        | 4.347793471 | 4.3138232   | 6.39576057  | 5.383683    | Cond2        | 4.330587886 | 6.116129529 | -1.785541643 | 1.785541643 | 3.447478711 | Down_in_Attr <sup>63</sup> | Fasted | Cond2        |
| Kazald1      | 4.854647    | 5.3742294   | 7.794796    | 5.92427     | Kazald1      | 5.1144382   | 6.893633    | -1.7791948   | 1.7791948   | 3.432345543 | Down_in_Attr <sup>63</sup> | Fasted | Kazald1      |
| Aoc3         | 5.6586514   | 5.7575912   | 8.58741     | 6.3759418   | Aoc3         | 5.7081213   | 7.4798414   | -1.7717201   | 1.7717201   | 3.414608319 | Down_in_Attr <sup>63</sup> | Fasted | Aoc3         |
| Il12a        | 3.34148958  | 3.348151    | 5.312645    | 4.968163    | Il12a        | 3.3815234   | 5.14971375  | -1.76819035  | 1.76819035  | 3.406264226 | Down_in_Attr <sup>63</sup> | Fasted | Il12a        |
| Col5a1       | 5.1117971   | 4.254809833 | 7.1050283   | 5.784308    | Col5a1       | 4.685103467 | 6.4466815   | -1.759564683 | 1.759564683 | 3.385959421 | Down_in_Attr <sup>63</sup> | Fasted | Col5a1       |
| Crtap        | 6.1931257   | 5.2459974   | 8.131175    | 6.816036    | Crtap        | 5.71956155  | 7.4736555   | -1.75409395  | 1.75409395  | 3.373144097 | Down_in_Attr <sup>63</sup> | Fasted | Crtap        |
| Dgt          | 8.999678    | 8.764585    | 11.937195   | 9.912525    | Dgt          | 8.881175    | 10.62461    | -1.74247825  | 1.74247825  | 3.346094638 | Down_in_Attr <sup>63</sup> | Fasted | Dgt          |
| Slc15a5      | 2.8437767   | 3.1963506   | 2.8971634   | 6.6087146   | Slc15a5      | 3.02006365  | 4.752939    | -1.73287535  | 1.73287535  | 3.323896247 | Down_in_Attr <sup>63</sup> | Fasted | Slc15a5      |
| Pitpnc1      | 6.331842525 | 5.4518444   | 7.5902248   | 7.646516975 | Pitpnc1      | 5.891843463 | 7.618370888 | -1.726527425 | 1.726527425 | 3.309303078 | Down_in_Attr <sup>63</sup> | Fasted | Pitpnc1      |
| Emp3         | 7.431538    | 5.5604935   | 8.808126    | 7.248469    | Emp3         | 6.49601575  | 8.2164975   | -1.72048175  | 1.72048175  | 3.295464319 | Down_in_Attr <sup>63</sup> | Fasted | Emp3         |
| Tmem45a      | 2.5676126   | 2.267407    | 5.601501    | 2.6699076   | Tmem45a      | 2.4173298   | 4.357043    | -1.7183745   | 1.7183745   | 3.290654364 | Down_in_Attr <sup>63</sup> | Fasted | Tmem45a      |
| Klhd5        | 3.4157631   | 3.1807559   | 5.3343406   | 4.6957765   | Klhd5        | 3.2982595   | 5.01505855  | -1.71679905  | 1.71679905  | 3.287062869 | Down_in_Attr <sup>63</sup> | Fasted | Klhd5        |
| Ccr7         | 8.611094    | 8.290807    | 10.27569    | 8.1992405   | Ccr7         | 8.4400905   | 10.1260473  | -1.7137957   | 1.7137957   | 3.285144887 | Down_in_Attr <sup>63</sup> | Fasted | Ccr7         |
| Hir          | 2.9104473   | 3.4324825   | 4.4807625   | 9.7775195   | Hir          | 3.16489715  | 4.88036915  | -1.715498375 | 1.715498375 | 3.284100723 | Down_in_Attr <sup>63</sup> | Fasted | Hir          |
| BC017612     | 3.4178975   | 3.2808055   | 5.2172925   | 4.902669    | BC017612     | 3.57219485  | 5.0999925   | -1.71061025  | 1.71061025  | 3.272992395 | Down_in_Attr <sup>63</sup> | Fasted | BC017612     |
| Nnat         | 2.7638073   | 3.0848472   | 6.129537    | 3.1352963   | Nnat         | 2.92432725  | 4.63241665  | -1.7080894   | 1.7080894   | 3.267278423 | Down_in_Attr <sup>63</sup> | Fasted | Nnat         |
| Gdap1        | 2.91941975  | 4.15257675  | 5.0181005   | 5.469605725 | Gdap1        | 3.353986325 | 5.243853113 | -1.707866788 | 1.707866788 | 3.26677431  | Down_in_Attr <sup>63</sup> | Fasted | Gdap1        |
| Lgals7       | 4.8228436   | 2.618881    | 8.150141    | 2.7072835   | Lgals7       | 3.7086335   | 5.42871225  | -1.7078489   | 1.7078489   | 3.266733807 | Down_in_Attr <sup>63</sup> | Fasted | Lgals7       |
| Zfp160       | 4.325468    | 6.067499    | 6.435447    | 7.369013    | Zfp160       | 5.1965585   | 6.90223     | -1.7056715   | 1.7056715   | 3.261807179 | Down_in_Attr <sup>63</sup> | Fasted | Zfp160       |
| Ptn          | 2.726408    | 2.870504    | 4.864665    | 4.13992405  | Ptn          | 3.378179    | 5.0606      | -1.681881    | 1.681881    | 3.208466006 | Down_in_Attr <sup>63</sup> | Fasted | Ptn          |
| Map26        | 3.967465    | 5.4905868   | 5.507598    | 5.9963627   | Map26        | 3.540914665 | 5.19081365  | -1.7028637   | 1.7028637   | 3.254565163 | Down_in_Attr <sup>63</sup> | Fasted | Map26        |
| B3galt2      | 8.998165    | 8.234572    | 10.0545435  | 10.494219   | B3galt2      | 8.57219485  | 10.27438125 | -1.702187    | 1.702187    | 3.253938536 | Down_in_Attr <sup>63</sup> | Fasted | B3galt2      |
| Igfbp5       | 6.13099035  | 6.0694236   | 7.8564515   | 7.747349    | Igfbp5       | 6.100260975 | 7.80190025  | -1.701693275 | 1.701693275 | 3.25282515  | Down_in_Attr <sup>63</sup> | Fasted | Igfbp5       |
| Cla2         | 2.9043815   | 3.208633    | 6.237933    | 6.0839667   | Cla2         | 2.9665075   | 4.6609685   | -1.6944626   | 1.6944626   | 3.236563031 | Down_in_Attr <sup>63</sup> | Fasted | Cla2         |
| Neu2         | 5.7804654   | 5.90713406  | 7.666253    | 5.713677    | Neu2         | 5.4296935   | 7.11881035  | -1.68911685  | 1.68911685  | 3.224592889 | Down_in_Attr <sup>63</sup> | Fasted | Neu2         |
| Dusp10       | 3.9548555   | 3.2359759   | 4.9537274   | 5.6092485   | Dusp10       | 3.596230725 | 5.281676125 | -1.6854454   | 1.6854454   | 3.213639801 | Down_in_Attr <sup>63</sup> | Fasted | Dusp10       |
| Rab71        | 4.073362    | 2.682986    | 5.231324    | 4.8889676   | Rab71        | 3.378179    | 5.0606      | -1.681881    | 1.681881    | 3.208466006 | Down_in_Attr <sup>63</sup> | Fasted | Rab71        |
| Cfp2         | 1.8669577   | 2.126479    | 4.582575    | 2.770891    | Cfp2         | 1.9967163   | 3.67668205  | -1.6799575   | 1.6799575   | 3.204203441 | Down_in_Attr <sup>63</sup> | Fasted | Cfp2         |
| Sncg         | 5.5948772   | 5.616704    | 8.334227    | 6.230295    | Sncg         | 5.6057906   | 7.282261    | -1.6764704   | 1.6764704   | 3.196449719 | Down_in_Attr <sup>63</sup> | Fasted | Sncg         |
| Usp2         | 9.3053915   | 9.09400275  | 10.6396275  | 11.1071075  | Usp2         | 9.199699375 | 10.8733675  | -1.673668125 | 1.673668125 | 3.190246996 | Down_in_Attr <sup>63</sup> | Fasted | Usp2         |
| Tnfai2       | 5.76474025  | 3.7677302   | 6.718389    | 6.146988    | Tnfai2       | 4.766235225 | 6.4326345   | -1.666428225 | 1.666428225 | 3.174277431 | Down_in_Attr <sup>63</sup> | Fasted | Tnfai2       |
| Ehfd1        | 4.7381926   | 4.2418436   | 6.758111    | 5.552136    | Ehfd1        | 4.4900136   | 6.1553123   | -1.6652987   | 1.6652987   | 3.171793176 | Down_in_Attr <sup>63</sup> | Fasted | Ehfd1        |
| Lynx1        | 6.522072    | 5.4060993   | 7.71455     | 8.064876    | Lynx1        | 5.96408565  | 7.761973    | -1.6554735   | 1.6554735   | 3.150645312 | Down_in_Attr <sup>63</sup> | Fasted | Lynx1        |
| Cpr155       | 6.976367    | 5.731874    | 8.570184    | 8.4834112   | Cpr155       | 6.8514212   | 8.9329578   | -1.6487718   | 1.6487718   | 3.13667598  | Down_in_Attr <sup>63</sup> | Fasted | Cpr155       |
| Angpt12      | 4.731224367 | 4.417517267 | 6.7589789   | 5.6866201   | Angpt12      | 4.574370817 | 6.2228205   | -1.648449683 | 1.648449683 | 3.134965754 | Down_in_Attr <sup>63</sup> | Fasted | Angpt12      |
| Synpo2       | 7.4632244   | 7.424822    | 8.7013      | 9.306555    | Synpo2       | 7.4440232   | 9.0883425   | -1.6443193   | 1.6443193   | 3.126003297 | Down_in_Attr <sup>63</sup> | Fasted | Synpo2       |
| Akr1c1       | 1.8554868   | 1.891856    | 5.0815463   | 1.949523    | Akr1c1       | 1.8736714   | 3.51553465  | -1.64186325  | 1.64186325  | 3.120686103 | Down_in_Attr <sup>63</sup> | Fasted | Akr1c1       |
| Ndr4a        | 5.2663228   | 2.923043    | 4.0866525   | 5.379845    | Ndr4a        | 4.09467855  | 5.73250125  | -1.638571575 | 1.638571575 | 3.113574015 | Down_in_Attr <sup>63</sup> | Fasted | Ndr4a        |
| Chr2         | 6.489743    | 7.9084263   | 8.530051    | 9.136399    | Chr2         | 7.19908465  | 8.833225    | -1.63414035  | 1.63414035  | 3.104025372 | Down_in_Attr <sup>63</sup> | Fasted | Chr2         |
| Clec10a      | 5.033356    | 5.020731    | 7.414057    | 5.905773    | Clec10a      | 5.0270435   | 6.6603175   | -1.6327365   | 1.6327365   | 3.102161187 | Down_in_Attr <sup>63</sup> | Fasted | Clec10a      |
| Fg6          | 2.8035688   | 2.901063    | 4.234137    | 4.723296    | Fg6          | 2.8232159   | 4.47871485  | -1.62639895  | 1.62639895  | 3.087413998 | Down_in_Attr <sup>63</sup> | Fasted | Fg6          |
| Krt77        | 5.308249    | 2.186454    | 8.505264    | 2.230784    | Krt77        | 3.7473515   | 5.3668212   | -1.6194697   | 1.6194697   | 3.076207033 | Down_in_Attr <sup>63</sup> | Fasted | Krt77        |
| Crc11        | 2.7607422   | 2.457281    | 5.942053    | 2.5125294   | Crc11        | 2.6909116   | 4.2275162   | -1.6185046   | 1.6185046   | 3.070565972 | Down_in_Attr <sup>63</sup> | Fasted | Crc11        |
| Ala64131     | 7.9249945   | 7.5746946   | 9.282887    | 9.446102    | Ala64131     | 7.7498445   | 9.3644945   | -1.61464995  | 1.61464995  | 3.062372862 | Down_in_Attr <sup>63</sup> | Fasted | Ala64131     |
| Serpinf1     | 9.273285    | 7.0763122   | 10.37901    | 9.19415675  | Serpinf1     | 8.1747986   | 9.786583375 | -1.611784775 | 1.611784775 | 3.056297061 | Down_in_Attr <sup>63</sup> | Fasted | Serpinf1     |
| Sh3kbp1      | 4.2212924   | 3.58440867  | 5.58589133  | 5.4058817   | Sh3kbp1      | 3.889866633 | 5.45888917  | -1.606022283 | 1.606022283 | 3.04411378  | Down_in_Attr <sup>63</sup> | Fasted | Sh3kbp1      |
| Trm13        | 5.0440952   | 5.7131953   | 7.1486073   | 6.815321    | Trm13        | 5.37889525  | 6.98156415  | -1.6036869   | 1.6036869   | 3.037888459 | Down_in_Attr <sup>63</sup> | Fasted | Trm13        |
| OC10040018K  | 3.7012858   | 5.139264    | 4.617674    | 5.803949    | OC10040018K  | 3.6101061   | 5.2107032   | -1.6005971   | 1.6005971   | 3.032688073 | Down_in_Attr <sup>63</sup> | Fasted | OC10040018K  |
| 2510090E07Rk | 7.1515527   | 6.6675367   | 8.444101    | 8.57122     | 2510090E07Rk | 6.9095447   | 8.5076605   | -1.5981158   | 1.5981158   | 3.027476581 | Down_in_Attr <sup>63</sup> | Fasted | 2510090E07Rk |
| Asb10        | 8.133871    | 8.598644    | 9.698467    | 10.221985   | Asb10        | 8.3662575   | 9.96033275  | -1.59407525  | 1.59407525  | 3.019009402 | Down_in_Attr <sup>63</sup> | Fasted | Asb10        |
| Tpm1         | 9.4577626   | 8.7124178   | 10.90142567 | 10.45382933 | Tpm1         | 9.08509002  | 10.6776275  | -1.5925373   | 1.5925373   | 3.015792776 | Down_in_Attr <sup>63</sup> | Fasted | Tpm1         |
| Basp1        | 4.6255074   | 2.8852446   | 5.644686    | 4.61888     | Basp1        | 3.655376    | 5.2416743   | -1.5862983   | 1.5862983   | 3.002779003 | Down_in_Attr <sup>63</sup> | Fasted | Basp1        |
| Igfbp1       | 10.438539   | 2.07208     | 2.072726    | 2.1181671   | Igfbp1       | 8.0551335   | 2.09544835  | 5.95986965   | 5.95986965  | 62.2442925  | Up_in_Attr <sup>63</sup>   | Fasted | Igfbp1       |
| Mafr         | 8.755807    | 9.014631    | 8.285156    | 3.2390194   | Mafr         | 8.885219    | 3.0852777   | 5.7899513    | 5.7899513   | 55.38134925 | Up_in_Attr <sup>63</sup>   | Fasted | Mafr         |
| Lcn2         | 2.55025     | 8.821214    | 6.745815    | 3.2053839   | Lcn2         | 2.55025     | 10.589132   | 5.65391445   | 5.65391445  | 60.34981072 | Up_in_Attr <sup>63</sup>   | Fasted | Lcn2         |
| Cxcl13       | 10.867678   | 7.0236855   | 3.3947183   | 3.249894    | Cxcl13       | 8.94568175  | 3.31485385  | 5.6308279    | 5.6308279   | 49.5500652  | Up_in_Attr <sup>63</sup>   | Fasted | Cxcl13       |
| Ddit4        | 12.014027   | 12.932342   | 6.867595    | 8.07233     | Ddit4        | 12.4731845  | 7.469959    | 5.0032255    | 5.0032255   | 32.07162392 | Up_in_Attr <sup>63</sup>   | Fasted | Ddit4        |
| Serpinak3    | 14.615722   | 5.541503    | 7.6425514   | 2.7403401   | Serpinak3    | 10.0786125  | 5.1927925   | 4.88581975   | 4.88581975  | 29.56502824 | Up_in_Attr <sup>63</sup>   | Fasted | Serpinak3    |

|                 |             |             |             |             |                 |             |             |             |             |              |                            |        |               |
|-----------------|-------------|-------------|-------------|-------------|-----------------|-------------|-------------|-------------|-------------|--------------|----------------------------|--------|---------------|
| "Hoga1"         | 6.5044074   | 7.46332     | 3.7153862   | 3.048305    | "Hoga1"         | 6.9838637   | 3.3818456   | 3.6020181   | 3.6020181   | 12.14270636  | Up, in, Atg <sup>100</sup> | Fasted | Hoga1         |
| "Fga"           | 12.467375   | 2.7309654   | 5.1379064   | 2.8642437   | "Fga"           | 7.5991612   | 4.00109205  | 3.59806915  | 3.59806915  | 12.10951475  | Up, in, Atg <sup>100</sup> | Fasted | Fga           |
| "2310008H04RIK" | 5.6017375   | 6.7389703   | 2.154195    | 2.9944642   | "2310008H04RIK" | 6.1703539   | 2.5743296   | 3.5960243   | 3.5960243   | 12.0923631   | Up, in, Atg <sup>100</sup> | Fasted | 2310008H04RIK |
| "Pp1r15a"       | 9.092163    | 10.11129    | 6.043604    | 6.0391844   | "Pp1r15a"       | 9.6115466   | 6.0391844   | 3.58571155  | 3.58571155  | 12.08621203  | Up, in, Atg <sup>100</sup> | Fasted | Pp1r15a       |
| "Gm9757"        | 4.2044888   | 7.857172    | 2.3467264   | 2.5459158   | "Gm9757"        | 6.0308304   | 2.4463211   | 3.5845093   | 3.5845093   | 12.09673097  | Up, in, Atg <sup>100</sup> | Fasted | Gm9757        |
| "Cyp3a25"       | 9.626839    | 2.4325104   | 2.4283957   | 2.4872136   | "Cyp3a25"       | 6.0296747   | 2.45781465  | 3.57186005  | 3.57186005  | 11.89151027  | Up, in, Atg <sup>100</sup> | Fasted | Cyp3a25       |
| "Crip"          | 9.622058    | 2.2125733   | 2.4582615   | 2.23544     | "Crip"          | 5.91731565  | 2.36485075  | 3.5704649   | 3.5704649   | 11.88001621  | Up, in, Atg <sup>100</sup> | Fasted | Crip          |
| "Apob"          | 10.008411   | 2.6415732   | 3.72464     | 2.6887665   | "Apob"          | 6.7749921   | 3.20670325  | 3.56828885  | 3.56828885  | 11.86211082  | Up, in, Atg <sup>100</sup> | Fasted | Apob          |
| "Ugt3a2"        | 9.596507    | 2.1478012   | 2.2462545   | 2.1911619   | "Ugt3a2"        | 5.8721541   | 2.3088547   | 3.5632994   | 3.5632994   | 11.82115748  | Up, in, Atg <sup>100</sup> | Fasted | Ugt3a2        |
| "Hc"            | 9.797356    | 2.5921986   | 2.641546    | 2.656216    | "Hc"            | 6.1947773   | 2.6338881   | 3.5558963   | 3.5558963   | 11.76065331  | Up, in, Atg <sup>100</sup> | Fasted | Hc            |
| "Psh"           | 12.855956   | 3.2005362   | 5.150025    | 3.2529604   | "Psh"           | 8.0280411   | 4.4816927   | 3.5405484   | 3.5405484   | 11.62602047  | Up, in, Atg <sup>100</sup> | Fasted | Psh           |
| "Arg1"          | 11.953897   | 2.0973692   | 4.4842      | 2.1460319   | "Arg1"          | 7.0256331   | 3.49511595  | 3.5305715   | 3.5305715   | 11.55557508  | Up, in, Atg <sup>100</sup> | Fasted | Arg1          |
| "Errf1"         | 11.6084635  | 10.7443135  | 7.4029807   | 7.9002185   | "Errf1"         | 11.1763885  | 7.6555996   | 3.5207889   | 3.5207889   | 11.47791667  | Up, in, Atg <sup>100</sup> | Fasted | Errf1         |
| "Tdo2"          | 10.448446   | 2.4864865   | 3.4509425   | 2.44580725  | "Tdo2"          | 6.467447325 | 2.94837625  | 3.519071075 | 3.519071075 | 11.46425798  | Up, in, Atg <sup>100</sup> | Fasted | Tdo2          |
| "C4bp"          | 9.902678    | 2.6752466   | 2.8510761   | 2.7103443   | "C4bp"          | 6.2881013   | 2.7807102   | 3.5073911   | 3.5073911   | 11.37181871  | Up, in, Atg <sup>100</sup> | Fasted | C4bp          |
| "Slc10a6"       | 7.883168    | 8.769984    | 4.8997564   | 4.74686897  | "Slc10a6"       | 8.326576    | 4.82422305  | 3.50235295  | 3.50235295  | 11.33217554  | Up, in, Atg <sup>100</sup> | Fasted | Slc10a6       |
| "Husc2"         | 7.45108     | 8.7315375   | 4.65076195  | 4.5495112   | "Husc2"         | 8.09730875  | 4.600136575 | 3.492172175 | 3.492172175 | 11.25248842  | Up, in, Atg <sup>100</sup> | Fasted | Husc2         |
| "Ccd1"          | 9.48611     | 2.3662248   | 2.744952    | 2.4167216   | "Ccd1"          | 5.50261574  | 2.4453004   | 3.479859    | 3.479859    | 11.16485888  | Up, in, Atg <sup>100</sup> | Fasted | Ccd1          |
| "Rdh7"          | 10.131063   | 2.240708    | 3.138788    | 2.294215    | "Rdh7"          | 6.1858855   | 2.7165051   | 3.469384    | 3.469384    | 11.07614546  | Up, in, Atg <sup>100</sup> | Fasted | Rdh7          |
| "Arnt1"         | 9.976254    | 9.492183    | 6.8930107   | 5.702671    | "Arnt1"         | 9.7342185   | 6.27084085  | 3.46337765  | 3.46337765  | 11.03012817  | Up, in, Atg <sup>100</sup> | Fasted | Arnt1         |
| "Serpin3a3n"    | 10.169079   | 4.3963084   | 4.198843    | 3.7447218   | "Serpin3a3n"    | 7.2825812   | 3.8230574   | 3.4595238   | 3.4595238   | 11.00070287  | Up, in, Atg <sup>100</sup> | Fasted | Serpin3a3n    |
| "Cyp7b1"        | 9.584972    | 2.78052275  | 2.6739224   | 2.82445255  | "Cyp7b1"        | 6.182749625 | 2.749183825 | 3.4335658   | 3.4335658   | 10.8045404   | Up, in, Atg <sup>100</sup> | Fasted | Cyp7b1        |
| "Cyp2d10"       | 10.366225   | 2.7412508   | 3.2932315   | 2.812829    | "Cyp2d10"       | 6.5537379   | 3.12108025  | 3.43265765  | 3.43265765  | 10.79774128  | Up, in, Atg <sup>100</sup> | Fasted | Cyp2d10       |
| "S10a08"        | 9.951294    | 5.4286837   | 4.1567802   | 4.329473    | "S10a08"        | 7.68907885  | 4.2746286   | 3.41445225  | 3.41445225  | 10.66234046  | Up, in, Atg <sup>100</sup> | Fasted | S10a08        |
| "Ass1"          | 9.840425    | 2.798902    | 2.9651327   | 2.8581898   | "Ass1"          | 6.3201276   | 2.918721875 | 3.4082541   | 3.4082541   | 10.61663085  | Up, in, Atg <sup>100</sup> | Fasted | Ass1          |
| "Tgfr1"         | 8.040514    | 8.092514    | 4.548755    | 4.774921    | "Tgfr1"         | 8.0687714   | 4.661838    | 3.406876    | 3.406876    | 10.60649441  | Up, in, Atg <sup>100</sup> | Fasted | Tgfr1         |
| "Ttpa"          | 11.32516    | 2.752347    | 4.5108023   | 2.7939684   | "Ttpa"          | 7.0387535   | 3.65238535  | 3.38636815  | 3.38636815  | 10.45679008  | Up, in, Atg <sup>100</sup> | Fasted | Ttpa          |
| "Apom"          | 9.630094    | 2.8275343   | 2.9341276   | 2.7843943   | "Apom"          | 6.22884115  | 2.85926095  | 3.3695532   | 3.3695532   | 10.33562123  | Up, in, Atg <sup>100</sup> | Fasted | Apom          |
| "Sox4"          | 5.6998898   | 8.30970242  | 3.7599784   | 3.51274356  | "Sox4"          | 7.0047957   | 3.6316361   | 3.3684347   | 3.3684347   | 10.32761288  | Up, in, Atg <sup>100</sup> | Fasted | Sox4          |
| "Ankrd33b"      | 10.902405   | 8.760312    | 6.840885    | 6.089345    | "Ankrd33b"      | 9.8313685   | 6.465115    | 3.3662535   | 3.3662535   | 10.31200884  | Up, in, Atg <sup>100</sup> | Fasted | Ankrd33b      |
| "Ugt2b5"        | 9.756211    | 2.7250805   | 2.983411    | 2.778163    | "Ugt2b5"        | 6.24065475  | 2.8764287   | 3.36421705  | 3.36421705  | 10.29746309  | Up, in, Atg <sup>100</sup> | Fasted | Ugt2b5        |
| "P9"            | 8.691565    | 1.9674891   | 1.948297    | 1.9919551   | "P9"            | 5.3295257   | 1.9701439   | 3.3593818   | 3.3593818   | 10.2639085   | Up, in, Atg <sup>100</sup> | Fasted | P9            |
| "1300017J02NRK" | 9.807227    | 2.751759    | 3.052498    | 2.8055553   | "1300017J02NRK" | 6.282193    | 2.9202665   | 3.35316635  | 3.35316635  | 10.21888829  | Up, in, Atg <sup>100</sup> | Fasted | 1300017J02NRK |
| "Itih1"         | 9.232942    | 2.49335     | 2.488521    | 2.5398052   | "Itih1"         | 5.863146    | 2.5141631   | 3.3489829   | 3.3489829   | 10.18929903  | Up, in, Atg <sup>100</sup> | Fasted | Itih1         |
| "Ttcl36"        | 9.300999    | 1.9246119   | 2.592327    | 1.9697703   | "Ttcl36"        | 5.61280545  | 2.28104865  | 3.3317568   | 3.3317568   | 10.06835999  | Up, in, Atg <sup>100</sup> | Fasted | Ttcl36        |
| "Sds"           | 9.755349    | 2.8779008   | 2.903238    | 2.905312    | "Sds"           | 6.2357954   | 2.9041346   | 3.3316608   | 3.3316608   | 10.06769004  | Up, in, Atg <sup>100</sup> | Fasted | Sds           |
| "Cpb2"          | 10.773221   | 2.7951536   | 4.115201    | 2.796418    | "Cpb2"          | 6.7841873   | 3.4558064   | 3.3283809   | 3.3283809   | 10.04627621  | Up, in, Atg <sup>100</sup> | Fasted | Cpb2          |
| "Anbp"          | 12.715095   | 2.1689807   | 5.972725    | 2.251854    | "Anbp"          | 7.442020425 | 4.1453396   | 3.3275027   | 3.3275027   | 10.03871497  | Up, in, Atg <sup>100</sup> | Fasted | Anbp          |
| "Flkbp5"        | 9.019725    | 9.7373953   | 6.06935935  | 6.10875605  | "Flkbp5"        | 9.396742325 | 6.0809577   | 3.307584625 | 3.307584625 | 9.90175753   | Up, in, Atg <sup>100</sup> | Fasted | Flkbp5        |
| "Itih3"         | 11.781739   | 2.2551434   | 3.127333    | 2.30502     | "Itih3"         | 7.1018442   | 3.71887665  | 3.29956455  | 3.29956455  | 9.846182976  | Up, in, Atg <sup>100</sup> | Fasted | Itih3         |
| "Asl"           | 10.312124   | 3.1826077   | 3.7113535   | 3.190392    | "Asl"           | 6.74736585  | 3.45087275  | 3.2964931   | 3.2964931   | 9.825243076  | Up, in, Atg <sup>100</sup> | Fasted | Asl           |
| "Pigr"          | 8.98830325  | 2.3650502   | 2.3613253   | 2.2418833   | "Pigr"          | 5.67667625  | 2.39007915  | 3.286597575 | 3.286597575 | 9.758081786  | Up, in, Atg <sup>100</sup> | Fasted | Pigr          |
| "C8a"           | 8.555149    | 2.359877    | 2.3181603   | 2.4208322   | "C8a"           | 6.565513    | 2.39949625  | 3.28601675  | 3.28601675  | 9.7541514    | Up, in, Atg <sup>100</sup> | Fasted | C8a           |
| "Ces1c"         | 12.06858    | 3.274404    | 5.901106    | 2.8985274   | "Ces1c"         | 7.671496    | 4.3986167   | 3.2716793   | 3.2716793   | 9.657697651  | Up, in, Atg <sup>100</sup> | Fasted | Ces1c         |
| "Dol2"          | 10.026507   | 11.609119   | 7.7113179   | 7.3651335   | "Dol2"          | 10.0187123  | 7.54851651  | 3.26925785  | 3.26925785  | 9.641501572  | Up, in, Atg <sup>100</sup> | Fasted | Dol2          |
| "Tmem140"       | 11.604283   | 12.149116   | 8.606438    | 8.621496    | "Tmem140"       | 11.8760995  | 8.613095    | 3.2634625   | 3.2634625   | 9.60047241   | Up, in, Atg <sup>100</sup> | Fasted | Tmem140       |
| "Itih4"         | 12.119061   | 1.8634597   | 5.5620127   | 1.9115148   | "Itih4"         | 6.99126035  | 3.73676375  | 3.2544966   | 3.2544966   | 9.543535397  | Up, in, Atg <sup>100</sup> | Fasted | Itih4         |
| "Angptl3"       | 9.37959     | 2.5519972   | 2.68962     | 2.768168    | "Angptl3"       | 5.9657936   | 2.728894    | 3.2368996   | 3.2368996   | 9.427655915  | Up, in, Atg <sup>100</sup> | Fasted | Angptl3       |
| "Ass1"          | 8.836802    | 2.343545    | 2.3119755   | 2.4005604   | "Ass1"          | 5.5002635   | 2.35626795  | 3.23399555  | 3.23399555  | 9.408700981  | Up, in, Atg <sup>100</sup> | Fasted | Ass1          |
| "Mug-ps1"       | 10.885075   | 3.1824093   | 4.384873    | 3.2408838   | "Mug-ps1"       | 7.03378265  | 3.8167484   | 3.21730425  | 3.21730425  | 9.300474031  | Up, in, Atg <sup>100</sup> | Fasted | Mug-ps1       |
| "Tgfr1"         | 7.864004167 | 9.052399667 | 5.20829567  | 5.273129667 | "Tgfr1"         | 8.458201917 | 5.240979667 | 3.21722225  | 3.21722225  | 9.299945256  | Up, in, Atg <sup>100</sup> | Fasted | Tgfr1         |
| "Fetub"         | 9.277067    | 2.3435118   | 2.809176    | 2.251854    | "Fetub"         | 5.8102894   | 2.5940703   | 3.2162191   | 3.2162191   | 9.293481136  | Up, in, Atg <sup>100</sup> | Fasted | Fetub         |
| "Asgr1"         | 8.647444    | 2.1595132   | 2.150664    | 2.2176547   | "Asgr1"         | 5.4034786   | 2.18730935  | 3.21616925  | 3.21616925  | 9.29318002   | Up, in, Atg <sup>100</sup> | Fasted | Asgr1         |
| "Marco"         | 8.67494     | 2.227633    | 2.196068    | 2.2809787   | "Marco"         | 5.4512865   | 2.23852335  | 3.21276315  | 3.21276315  | 9.271245412  | Up, in, Atg <sup>100</sup> | Fasted | Marco         |
| "Mug1"          | 10.825929   | 2.6076655   | 4.362635    | 2.65792     | "Mug1"          | 6.71679725  | 3.5102775   | 3.20651975  | 3.20651975  | 9.231209907  | Up, in, Atg <sup>100</sup> | Fasted | Mug1          |
| "Ugt2b1"        | 8.442541    | 2.0167828   | 2.0107903   | 2.06594     | "Ugt2b1"        | 5.2296619   | 2.03816515  | 3.19129675  | 3.19129675  | 9.134316314  | Up, in, Atg <sup>100</sup> | Fasted | Ugt2b1        |
| "Ugt2a3"        | 8.525341    | 2.4714777   | 2.1237473   | 2.1750097   | "Ugt2a3"        | 5.33624435  | 2.149142    | 3.18710235  | 3.18710235  | 9.10779835   | Up, in, Atg <sup>100</sup> | Fasted | Ugt2a3        |
| "Apon"          | 8.791931    | 2.3486357   | 3.2807998   | 3.2907998   | "Apon"          | 5.57028335  | 2.389429    | 3.18634005  | 3.18634005  | 9.1029889711 | Up, in, Atg <sup>100</sup> | Fasted | Apon          |
| "Sdc4"          | 9.914551    | 9.94315     | 7.6813523   | 6.81138475  | "Sdc4"          | 10.4294005  | 7.2476685   | 3.18171195  | 3.18171195  | 9.07357799   | Up, in, Atg <sup>100</sup> | Fasted | Sdc4          |
| "Cyp3a13"       | 9.555749    | 3.345165    | 3.1678894   | 3.3459588   | "Cyp3a13"       | 6.450457    | 3.2712431   | 3.1792139   | 3.1792139   | 9.058134114  | Up, in, Atg <sup>100</sup> | Fasted | Cyp3a13       |
| "Itih2"         | 9.948156    | 2.6380522   | 3.7627811   | 2.4840038   | "Itih2"         | 6.2931041   | 3.12329245  | 3.16971165  | 3.16971165  | 8.998669143  | Up, in, Atg <sup>100</sup> | Fasted | Itih2         |
| "Ahsq"          | 11.358475   | 2.5188308   | 5.2087893   | 2.312334    | "Ahsq"          | 6.9386529   | 3.77001165  | 3.16864125  | 3.16864125  | 8.991995104  | Up, in, Atg <sup>100</sup> | Fasted | Ahsq          |
| "Slc39a14"      | 6.0491508   | 6.65429515  | 3.317564    | 3.2003024   | "Slc39a14"      | 6.351722975 | 3.1908944   | 3.16082875  | 3.16082875  | 8.943432061  | Up, in, Atg <sup>100</sup> | Fasted | Slc39a14      |
| "Cyp2b10"       | 8.947486333 | 2.571058767 | 2.642225867 | 2.585254767 | "Cyp2b10"       | 5.75927255  | 2.613470317 | 3.145532233 | 3.145532233 | 8.849109203  | Up, in, Atg <sup>100</sup> | Fasted | Cyp2b10       |
| "Apon"          | 12.258154   | 3.3841974   | 6.536552    | 2.8093114   | "Apon"          | 7.8036757   | 3.6887317   | 3.134944    | 3.134944    | 8.784404526  | Up, in, Atg <sup>100</sup> | Fasted | Apon          |
| "Hcra"          | 6.54784715  | 7.42005     | 9.3597923   | 8.7917085   | "Hcra"          | 6.984048975 | 3.85880825  | 3.12536005  | 3.12536005  | 8.722329377  | Up, in, Atg <sup>100</sup> | Fasted | Hcra          |
| "Orm2"          | 12.158334   | 3.1455293   | 5.9773226   | 3.0928525   | "Orm2"          | 7.65193165  | 4.53495255  | 3.1169791   | 3.1169791   | 8.676569387  | Up, in, Atg <sup>100</sup> | Fasted | Orm2          |
| "Upb1"          | 9.133528    | 2.6783469   | 2.8548355   | 2.7391942   | "Upb1"          | 5.9059375</ |             |             |             |              |                            |        |               |

|                  |             |             |             |            |                  |             |             |             |             |             |                           |        |                |
|------------------|-------------|-------------|-------------|------------|------------------|-------------|-------------|-------------|-------------|-------------|---------------------------|--------|----------------|
| "Aldob"          | 11.318403   | 3.6018064   | 5.850811    | 3.5536184  | "Aldob"          | 7.4601047   | 4.7022147   | 2.75789     | 2.75789     | 6.764062545 | Up, in Atg <sup>100</sup> | Fasted | Aldob          |
| "Hp"             | 13.712268   | 6.206409    | 9.532523    | 4.8884643  | "Hp"             | 9.9584585   | 7.20869365  | 2.74976485  | 2.74976485  | 6.726074926 | Up, in Atg <sup>100</sup> | Fasted | Hp             |
| "Pzp"            | 12.693493   | 2.6001852   | 6.985067    | 2.8143072  | "Pzp"            | 7.6468391   | 4.8998671   | 2.747152    | 2.747152    | 6.713904426 | Up, in Atg <sup>100</sup> | Fasted | Pzp            |
| "Trn41a"         | 8.514703    | 2.9671478   | 2.9691073   | 3.053347   | "Trn41a"         | 8.0074254   | 3.0017604   | 2.733214    | 2.733214    | 6.64084164  | Up, in Atg <sup>100</sup> | Fasted | Trn41a         |
| "Gad45a"         | 12.326198   | 10.741036   | 9.090863    | 5.502762   | "Gad45a"         | 11.533617   | 8.8004125   | 2.7332045   | 2.7332045   | 6.649309556 | Up, in Atg <sup>100</sup> | Fasted | Gad45a         |
| "Ces3a"          | 8.168003    | 2.715075    | 2.6559072   | 2.763339   | "Ces3a"          | 5.441539    | 2.7096231   | 2.7319159   | 2.7319159   | 6.643372915 | Up, in Atg <sup>100</sup> | Fasted | Ces3a          |
| "Gliu1"          | 12.754804   | 10.325058   | 10.393636   | 10.119787  | "Gliu1"          | 12.987681   | 10.2567115  | 2.7309695   | 2.7309695   | 6.639016328 | Up, in Atg <sup>100</sup> | Fasted | Gliu1          |
| "Serp1n2"        | 8.121497    | 3.324005    | 3.0564275   | 2.927443   | "Serp1n2"        | 5.72275275  | 2.9193525   | 2.7308175   | 2.7308175   | 6.638316889 | Up, in Atg <sup>100</sup> | Fasted | Serp1n2        |
| "Sc7a6"          | 8.0243525   | 7.9809625   | 6.171866    | 6.172879   | "Sc7a6"          | 8.902659375 | 6.1723695   | 2.730332425 | 2.730332425 | 6.636085273 | Up, in Atg <sup>100</sup> | Fasted | Sc7a6          |
| "LOC100048662"   | 10.82043533 | 2.928739    | 5.5999605   | 2.7083112  | "LOC100048662"   | 7.64488117  | 4.15413585  | 2.720352267 | 2.720352267 | 6.590337122 | Up, in Atg <sup>100</sup> | Fasted | LOC100048662   |
| "Soc3"           | 10.349654   | 10.472242   | 7.806575    | 6.2204955  | "Soc3"           | 10.409445   | 7.00326525  | 2.710568075 | 2.710568075 | 6.545305421 | Up, in Atg <sup>100</sup> | Fasted | Soc3           |
| "EIf4ebp1"       | 10.60851517 | 11.47544167 | 8.386579667 | 8.72949567 | "EIf4ebp1"       | 11.0419762  | 6.33308967  | 2.70888795  | 2.70888795  | 6.538174807 | Up, in Atg <sup>100</sup> | Fasted | EIf4ebp1       |
| "P4k2a"          | 7.7814932   | 8.877177    | 5.8062495   | 5.4401295  | "P4k2a"          | 8.32933535  | 5.623212    | 2.70612335  | 2.70612335  | 6.525657865 | Up, in Atg <sup>100</sup> | Fasted | P4k2a          |
| "AB041803"       | 8.570007    | 9.740113    | 6.0634527   | 6.849936   | "AB041803"       | 9.15506     | 6.45669435  | 2.69836565  | 2.69836565  | 6.49066209  | Up, in Atg <sup>100</sup> | Fasted | AB041803       |
| "Proc"           | 8.175514    | 2.785396    | 2.7318187   | 2.844062   | "Proc"           | 5.480455    | 2.78794035  | 2.69251465  | 2.69251465  | 6.46439184  | Up, in Atg <sup>100</sup> | Fasted | Proc           |
| "Ifrd1"          | 11.800606   | 12.220183   | 9.231168    | 9.4169035  | "Ifrd1"          | 12.0103945  | 9.32603575  | 2.68435875  | 2.68435875  | 6.427950192 | Up, in Atg <sup>100</sup> | Fasted | Ifrd1          |
| "F12"            | 7.7662754   | 2.3752646   | 2.355442    | 2.4203095  | "F12"            | 7.077077    | 2.38792585  | 2.68284415  | 2.68284415  | 6.421205409 | Up, in Atg <sup>100</sup> | Fasted | F12            |
| "Cyp3a11"        | 12.409155   | 1.437697    | 7.0346117   | 1.4733362  | "Cyp3a11"        | 6.92342735  | 4.2539685   | 2.6694584   | 2.6694584   | 6.361903109 | Up, in Atg <sup>100</sup> | Fasted | Cyp3a11        |
| "Cebp"           | 11.938639   | 12.009533   | 9.08725635  | 9.5246965  | "Cebp"           | 11.974086   | 9.305933    | 2.668153    | 2.668153    | 6.356149244 | Up, in Atg <sup>100</sup> | Fasted | Cebp           |
| "LOC100046187"   | 7.664173    | 2.3337493   | 2.2922725   | 2.373713   | "LOC100046187"   | 4.9986615   | 2.3297025   | 2.6659909   | 2.6659909   | 6.346630713 | Up, in Atg <sup>100</sup> | Fasted | LOC100046187   |
| "Nnmt"           | 11.470606   | 6.985283    | 7.555297    | 5.587518   | "Nnmt"           | 9.22801715  | 6.5713785   | 2.6566433   | 2.6566433   | 6.305642157 | Up, in Atg <sup>100</sup> | Fasted | Nnmt           |
| "Ugt2b34"        | 7.736785    | 2.4042985   | 2.3718966   | 2.461043   | "Ugt2b34"        | 5.070714175 | 2.41647195  | 2.654242225 | 2.654242225 | 6.295156416 | Up, in Atg <sup>100</sup> | Fasted | Ugt2b34        |
| "Pcd1"           | 8.03105     | 2.74541     | 2.741969    | 2.7617476  | "Pcd1"           | 5.3892955   | 2.7591576   | 2.630138    | 2.630138    | 6.190852128 | Up, in Atg <sup>100</sup> | Fasted | Pcd1           |
| "Serp1n1c"       | 13.873818   | 1.494161    | 6.630851    | 5.1953986  | "Serp1n1c"       | 7.6838905   | 5.0963948   | 2.5873947   | 2.5873947   | 6.010957002 | Up, in Atg <sup>100</sup> | Fasted | Serp1n1c       |
| "Sc2b4"          | 8.772198    | 5.6295209   | 4.5872033   | 4.6842975  | "Sc2b4"          | 7.2005895   | 4.617816    | 2.58304375  | 2.58304375  | 6.090244346 | Up, in Atg <sup>100</sup> | Fasted | Sc2b4          |
| "Cyp2a12"        | 7.1857247   | 2.0257115   | 1.9931693   | 2.0555086  | "Cyp2a12"        | 4.6057181   | 2.02433895  | 2.58137915  | 2.58137915  | 5.985115756 | Up, in Atg <sup>100</sup> | Fasted | Cyp2a12        |
| "Gbp6"           | 8.868995    | 7.3341336   | 4.8579855   | 6.190551   | "Gbp6"           | 8.0156655   | 5.52426825  | 2.5772983   | 2.5772983   | 5.968210001 | Up, in Atg <sup>100</sup> | Fasted | Gbp6           |
| "Ulk1"           | 7.6872525   | 8.48059385  | 5.311199    | 5.7071147  | "Ulk1"           | 8.083923175 | 5.5091173   | 2.574805875 | 2.574805875 | 5.957908119 | Up, in Atg <sup>100</sup> | Fasted | Ulk1           |
| "Clec4g"         | 7.498005    | 2.3379126   | 2.3016093   | 2.3909256  | "Clec4g"         | 4.9184088   | 2.34630795  | 2.57210085  | 2.57210085  | 5.946747624 | Up, in Atg <sup>100</sup> | Fasted | Clec4g         |
| "Sc15a4"         | 8.85475     | 9.754462    | 6.6134214   | 6.8684106  | "Sc15a4"         | 9.304606    | 6.740916    | 2.56369     | 2.56369     | 5.912179205 | Up, in Atg <sup>100</sup> | Fasted | Sc15a4         |
| "P4k4"           | 13.625732   | 14.307518   | 11.08105    | 11.881676  | "P4k4"           | 12.011625   | 11.4489173  | 2.5627075   | 2.5627075   | 5.908154281 | Up, in Atg <sup>100</sup> | Fasted | P4k4           |
| "S430548M080R1k" | 5.45779145  | 6.67576135  | 3.76158685  | 3.27201465 | "S430548M080R1k" | 6.0667774   | 3.51680165  | 2.5499775   | 2.5499775   | 5.895243346 | Up, in Atg <sup>100</sup> | Fasted | S430548M080R1k |
| "Klhl1"          | 7.6555657   | 2.497179    | 2.520083    | 2.5408564  | "Klhl1"          | 5.0763235   | 2.5304697   | 2.54590265  | 2.54590265  | 5.839733976 | Up, in Atg <sup>100</sup> | Fasted | Klhl1          |
| "Ube4a"          | 5.863881    | 7.7110725   | 4.1306245   | 4.374867   | "Ube4a"          | 6.78747675  | 4.252614725 | 2.534862025 | 2.534862025 | 5.795214355 | Up, in Atg <sup>100</sup> | Fasted | Ube4a          |
| "Sc7a2"          | 7.026407    | 6.85976733  | 4.75551067  | 4.54247933 | "Sc7a2"          | 6.943131217 | 4.4094942   | 2.533637017 | 2.533637017 | 5.790295663 | Up, in Atg <sup>100</sup> | Fasted | Sc7a2          |
| "Hmg2b"          | 8.176128    | 9.570765    | 6.4520538   | 6.2329223  | "Hmg2b"          | 8.87344525  | 6.34248085  | 2.5309572   | 2.5309572   | 5.799505129 | Up, in Atg <sup>100</sup> | Fasted | Hmg2b          |
| "Srng1"          | 8.3622112   | 9.7347696   | 6.535709    | 6.50613104 | "Srng1"          | 9.04849408  | 6.52092007  | 2.52757311  | 2.52757311  | 5.766000085 | Up, in Atg <sup>100</sup> | Fasted | Srng1          |
| "Mnl1"           | 6.830714    | 1.756546    | 1.734461    | 1.7998518  | "Mnl1"           | 4.2936293   | 1.77498985  | 2.52193005  | 2.52193005  | 5.743500753 | Up, in Atg <sup>100</sup> | Fasted | Mnl1           |
| "H2-Q10"         | 9.778179    | 3.4076087   | 4.959718    | 3.23839    | "H2-Q10"         | 6.59289385  | 4.090954    | 2.49383985  | 2.49383985  | 5.632751595 | Up, in Atg <sup>100</sup> | Fasted | H2-Q10         |
| "Serp1n1"        | 8.927238    | 3.398284    | 3.875277    | 3.465589   | "Serp1n1"        | 6.162761    | 3.670433    | 2.492328    | 2.492328    | 5.626851932 | Up, in Atg <sup>100</sup> | Fasted | Serp1n1        |
| "Plk3"           | 7.1412935   | 2.1647658   | 2.1264536   | 2.203215   | "Plk3"           | 4.65302965  | 2.164843    | 2.48819535  | 2.48819535  | 5.610756683 | Up, in Atg <sup>100</sup> | Fasted | Plk3           |
| "Mett17b"        | 7.417821    | 2.4686363   | 2.4189992   | 2.501036   | "Mett17b"        | 4.94322865  | 2.4600176   | 2.48321105  | 2.48321105  | 5.591405787 | Up, in Atg <sup>100</sup> | Fasted | Mett17b        |
| "Piga"           | 6.3211403   | 6.34233     | 3.404931    | 4.2987065  | "Piga"           | 6.33173515  | 3.19818175  | 2.4799164   | 2.4799164   | 5.578651389 | Up, in Atg <sup>100</sup> | Fasted | Piga           |
| "Cyp2t2"         | 7.9208133   | 1.9271076   | 2.288792    | 2.0707297  | "Cyp2t2"         | 4.65959445  | 2.17571945  | 2.479875    | 2.479875    | 5.574891305 | Up, in Atg <sup>100</sup> | Fasted | Cyp2t2         |
| "Cso1"           | 11.371002   | 6.393604    | 4.7667139   | 4.7667139  | "Cso1"           | 8.052148    | 4.7667139   | 2.473826    | 2.473826    | 5.55360654  | Up, in Atg <sup>100</sup> | Fasted | Cso1           |
| "1110038017R1k"  | 10.286071   | 11.478397   | 8.244705    | 8.578232   | "1110038017R1k"  | 10.882234   | 8.411464    | 2.47077     | 2.47077     | 5.543395723 | Up, in Atg <sup>100</sup> | Fasted | 1110038017R1k  |
| "Gjb2"           | 7.452399    | 2.3945131   | 2.430531    | 2.4808636  | "Gjb2"           | 4.92345605  | 2.4556973   | 2.46775875  | 2.46775875  | 5.531837395 | Up, in Atg <sup>100</sup> | Fasted | Gjb2           |
| "Ahcy"           | 12.45592    | 5.977615    | 8.569177    | 8.53436    | "Ahcy"           | 11.0167675  | 8.5517685   | 2.464999    | 2.464999    | 5.521265587 | Up, in Atg <sup>100</sup> | Fasted | Ahcy           |
| "Gclt"           | 9.6733795   | 8.6073665   | 6.42557695  | 6.3959715  | "Gclt"           | 9.140374    | 6.68306255  | 2.45731145  | 2.45731145  | 5.491923197 | Up, in Atg <sup>100</sup> | Fasted | Gclt           |
| "Xirp1"          | 8.1040734   | 8.91399     | 7.3105383   | 6.7401867  | "Xirp1"          | 9.480682    | 7.0253625   | 2.4553195   | 2.4553195   | 5.484345652 | Up, in Atg <sup>100</sup> | Fasted | Xirp1          |
| "Orn3"           | 7.089934    | 2.1719453   | 2.148764    | 2.231086   | "Orn3"           | 4.63093965  | 2.138591    | 2.44504865  | 2.44504865  | 5.454662332 | Up, in Atg <sup>100</sup> | Fasted | Orn3           |
| "gfbp3"          | 9.681698    | 10.833407   | 8.271198    | 7.36109    | "gfbp3"          | 10.257598   | 7.817144    | 2.440454    | 2.440454    | 5.42815211  | Up, in Atg <sup>100</sup> | Fasted | gfbp3          |
| "Hsd17b2"        | 7.3621693   | 2.5190065   | 2.460664    | 2.540296   | "Hsd17b2"        | 4.9405879   | 2.5004812   | 2.4401067   | 2.4401067   | 5.426818656 | Up, in Atg <sup>100</sup> | Fasted | Hsd17b2        |
| "Tle1"           | 8.929634    | 9.7302665   | 6.907092    | 6.8802514  | "Tle1"           | 9.32995025  | 6.8963717   | 2.43627855  | 2.43627855  | 5.412437836 | Up, in Atg <sup>100</sup> | Fasted | Tle1           |
| "Dpyd"           | 5.894575    | 6.45732645  | 3.89582435  | 4.49705325 | "Dpyd"           | 6.626391975 | 4.1964388   | 2.429953175 | 2.429953175 | 5.388759404 | Up, in Atg <sup>100</sup> | Fasted | Dpyd           |
| "Tfcd"           | 7.593355    | 2.124783    | 2.7047157   | 2.1743839  | "Tfcd"           | 4.864609    | 2.4395498   | 2.4245192   | 2.4245192   | 5.368500579 | Up, in Atg <sup>100</sup> | Fasted | Tfcd           |
| "Aagp9"          | 7.672186    | 2.276277    | 2.7808747   | 2.3320207  | "Aagp9"          | 4.7423215   | 2.5519477   | 2.4222838   | 2.4222838   | 5.360188736 | Up, in Atg <sup>100</sup> | Fasted | Aagp9          |
| "Pon1"           | 11.213334   | 3.3814592   | 5.545446    | 4.213834   | "Pon1"           | 7.2971996   | 4.479964    | 2.4177566   | 2.4177566   | 5.343947437 | Up, in Atg <sup>100</sup> | Fasted | Pon1           |
| "Plac8"          | 7.965345    | 2.0603971   | 3.059602    | 2.142435   | "Plac8"          | 5.01297105  | 2.600976    | 2.4127345   | 2.4127345   | 5.33212503  | Up, in Atg <sup>100</sup> | Fasted | Plac8          |
| "Acot1"          | 6.25605635  | 7.79597075  | 4.68525085  | 4.542689   | "Acot1"          | 7.02601355  | 4.61396925  | 2.41204625  | 2.41204625  | 5.3222771   | Up, in Atg <sup>100</sup> | Fasted | Acot1          |
| "Ttr"            | 13.80640371 | 3.036834433 | 9.239024    | 7.81918133 | "Ttr"            | 8.4216188   | 6.010462917 | 2.411155883 | 2.411155883 | 5.31900312  | Up, in Atg <sup>100</sup> | Fasted | Ttr            |
| "Aldh8a1"        | 6.8864802   | 2.7459016   | 2.35466185  | 2.4605747  | "Aldh8a1"        | 4.8161909   | 2.407618275 | 2.408572625 | 2.408572625 | 5.309487551 | Up, in Atg <sup>100</sup> | Fasted | Aldh8a1        |
| "Saa3"           | 9.958399    | 4.987681    | 5.4696937   | 4.6658773  | "Saa3"           | 7.47304     | 5.067855    | 2.4052545   | 2.4052545   | 5.297290033 | Up, in Atg <sup>100</sup> | Fasted | Saa3           |
| "Alb"            | 15.423029   | 4.820199    | 11.91586    | 3.5171123  | "Alb"            | 10.121614   | 7.71648851  | 2.40512785  | 2.40512785  | 5.296825019 | Up, in Atg <sup>100</sup> | Fasted | Alb            |
| "Lpn2"           | 7.63599433  | 4.868157    | 3.82751833  | 3.8665204  | "Lpn2"           | 6.52075667  | 3.84701967  | 2.4050563   | 2.4050563   | 5.296562332 | Up, in Atg <sup>100</sup> | Fasted | Lpn2           |
| "Gta3"           | 8.804465    | 3.16811765  | 3.2623575   | 3.094124   | "Gta3"           | 5.62635075  | 3.2289312   | 2.3989312   | 2.3989312   | 5.290813794 | Up, in Atg <sup>100</sup> | Fasted | Gta3           |
| "Gch1"           | 7.9911022   | 3.5782335   | 3.275595    | 3.494556   | "Gch1"           | 5.78201275  | 3.3855255   | 2.396486775 | 2.396486775 | 5.265194312 | Up, in Atg <sup>100</sup> | Fasted | Gch1           |
| "Lipc"           | 6.8024974   | 1.9570408   | 1.9523256   | 2.0341375  | "Lipc"           | 4.3887691   | 1.9932155   | 2.3         |             |             |                           |        |                |

|             |             |             |             |             |             |             |             |             |             |             |                         |        |             |
|-------------|-------------|-------------|-------------|-------------|-------------|-------------|-------------|-------------|-------------|-------------|-------------------------|--------|-------------|
| Jumb        | 5.892823    | 4.7597113   | 3.2615168   | 3.0819712   | Jumb        | 5.32626715  | 3.171744    | 2.15452315  | 2.15452315  | 4.452214651 | Up in Atg <sup>10</sup> | Fasted | Jumb        |
| Cyp2c44     | 6.5409193   | 2.1897254   | 2.1819267   | 2.2466837   | Cyp2c44     | 4.36532235  | 2.213052    | 2.15201715  | 2.15201715  | 4.44487748  | Up in Atg <sup>10</sup> | Fasted | Cyp2c44     |
| Vtn         | 9.7490705   | 4.2777193   | 4.87351235  | 4.85028625  | Vtn         | 7.01145025  | 4.8618993   | 2.151245725 | 2.151245725 | 4.442111867 | Up in Atg <sup>10</sup> | Fasted | Vtn         |
| Plg3z12b    | 6.4968626   | 2.0613411   | 2.0621081   | 2.1296775   | Plg3z12b    | 4.2801108   | 2.1296775   | 2.15050345  | 2.15050345  | 4.43924062  | Up in Atg <sup>10</sup> | Fasted | Plg3z12b    |
| Gcg         | 5.78842     | 2.530126    | 2.480845    | 2.5368991   | Gcg         | 4.6592163   | 2.50976705  | 2.14944925  | 2.14944925  | 4.43583895  | Up in Atg <sup>10</sup> | Fasted | Gcg         |
| Sic2a2      | 6.3506026   | 2.0093127   | 1.9968436   | 2.0648028   | Sic2a2      | 4.17996215  | 2.0308682   | 2.14909395  | 2.14909395  | 4.435491409 | Up in Atg <sup>10</sup> | Fasted | Sic2a2      |
| Mpd2        | 7.66115975  | 3.73251485  | 3.641492    | 3.46329105  | Mpd2        | 5.6968373   | 3.552385125 | 2.144452175 | 2.144452175 | 4.421243445 | Up in Atg <sup>10</sup> | Fasted | Mpd2        |
| Grif1       | 7.794781    | 8.448507    | 5.6579313   | 6.30082     | Grif1       | 8.121644    | 5.97937565  | 2.14226835  | 2.14226835  | 4.414556018 | Up in Atg <sup>10</sup> | Fasted | Grif1       |
| Trp53inp1   | 7.743901    | 7.6411235   | 5.514467    | 5.5879663   | Trp53inp1   | 7.692511675 | 5.551255    | 2.141296175 | 2.141296175 | 4.411582226 | Up in Atg <sup>10</sup> | Fasted | Trp53inp1   |
| Gdrl5       | 6.6131635   | 2.3607225   | 2.328833    | 2.3746362   | Gdrl5       | 4.486943    | 2.3517346   | 2.1352084   | 2.1352084   | 4.393005787 | Up in Atg <sup>10</sup> | Fasted | Gdrl5       |
| Pde4b       | 10.783958   | 10.26975    | 8.46104     | 8.305121    | Pde4b       | 8.46104     | 8.3941125   | 2.132562    | 2.132562    | 4.386954887 | Up in Atg <sup>10</sup> | Fasted | Pde4b       |
| Ddc         | 6.889088    | 2.571845    | 2.526705    | 2.4706705   | Ddc         | 4.63045475  | 2.4986705   | 2.13179425  | 2.13179425  | 4.382621993 | Up in Atg <sup>10</sup> | Fasted | Ddc         |
| Tekt1       | 3.731254    | 7.390697    | 3.081243    | 3.8537197   | Tekt1       | 5.5609755   | 3.445922    | 2.1150535   | 2.1150535   | 4.332060827 | Up in Atg <sup>10</sup> | Fasted | Tekt1       |
| Bhmt2       | 7.1519792   | 3.0528336   | 2.9437844   | 3.0342599   | Bhmt2       | 5.1024064   | 2.98902215  | 2.11338425  | 2.11338425  | 4.327051375 | Up in Atg <sup>10</sup> | Fasted | Bhmt2       |
| Agmat       | 6.4232693   | 2.2306964   | 2.176339    | 2.2571783   | Agmat       | 4.32698285  | 2.21675865  | 2.1102242   | 2.1102242   | 4.317583862 | Up in Atg <sup>10</sup> | Fasted | Agmat       |
| Usp3        | 6.7375215   | 7.89592275  | 5.0742345   | 5.363308    | Usp3        | 7.31672195  | 5.21877125  | 2.0979507   | 2.0979507   | 4.2810085   | Up in Atg <sup>10</sup> | Fasted | Usp3        |
| Zbtb2       | 7.819121    | 7.89014     | 5.5864396   | 5.9132317   | Zbtb2       | 7.8546305   | 5.75963665  | 2.09499385  | 2.09499385  | 4.27224342  | Up in Atg <sup>10</sup> | Fasted | Zbtb2       |
| Ehadh1      | 9.094774    | 5.614953    | 5.6090616   | 4.842058    | Ehadh1      | 7.3558035   | 5.366098    | 2.0898037   | 2.0898037   | 4.25901476  | Up in Atg <sup>10</sup> | Fasted | Ehadh1      |
| Abcc8       | 4.976018    | 6.0863805   | 3.4419184   | 3.4713871   | Abcc8       | 5.55119925  | 3.44315275  | 2.0880465   | 2.0880465   | 4.251719734 | Up in Atg <sup>10</sup> | Fasted | Abcc8       |
| Gm16515     | 8.205771    | 8.342051    | 6.2705536   | 6.102092    | Gm16515     | 8.273911    | 6.1863228   | 2.0875882   | 2.0875882   | 4.250369307 | Up in Atg <sup>10</sup> | Fasted | Gm16515     |
| Pipox       | 6.0598087   | 1.8915056   | 1.8788048   | 1.9265537   | Pipox       | 3.97665715  | 1.90267925  | 2.0739779   | 2.0739779   | 4.21046012  | Up in Atg <sup>10</sup> | Fasted | Pipox       |
| Snhg5       | 8.960137    | 10.652838   | 7.832798    | 7.6534632   | Snhg5       | 9.8064875   | 7.7432182   | 2.0623693   | 2.0623693   | 4.17932311  | Up in Atg <sup>10</sup> | Fasted | Snhg5       |
| Cideb       | 6.269945    | 2.0898865   | 2.1005232   | 2.1339436   | Cideb       | 4.17990675  | 2.1168077   | 2.0630905   | 2.0630905   | 4.178829944 | Up in Atg <sup>10</sup> | Fasted | Cideb       |
| Kcnd2       | 7.88558333  | 8.5821088   | 6.02160833  | 6.327487767 | Kcnd2       | 8.322788567 | 6.17454805  | 2.05842517  | 2.05842517  | 4.164780658 | Up in Atg <sup>10</sup> | Fasted | Kcnd2       |
| Otdnd183e   | 6.252841    | 4.504229    | 3.8725473   | 3.905121    | Otdnd183e   | 4.7282645   | 3.7712385   | 2.0573295   | 2.0573295   | 4.16298056  | Up in Atg <sup>10</sup> | Fasted | Otdnd183e   |
| Mst1        | 6.5614853   | 2.3909135   | 2.397416    | 2.4483123   | Mst1        | 4.4802494   | 2.4286415   | 2.05738525  | 2.05738525  | 4.162312401 | Up in Atg <sup>10</sup> | Fasted | Mst1        |
| Spp2        | 6.499166    | 2.3054895   | 2.3270683   | 2.3697524   | Spp2        | 4.40232775  | 2.34841035  | 2.0539174   | 2.0539174   | 4.152319339 | Up in Atg <sup>10</sup> | Fasted | Spp2        |
| Eif2ak4     | 6.047769    | 8.401313    | 4.979372    | 5.3882327   | Eif2ak4     | 7.224541    | 5.13880235  | 2.04073865  | 2.04073865  | 4.114561395 | Up in Atg <sup>10</sup> | Fasted | Eif2ak4     |
| Ankrd2      | 12.925726   | 12.202344   | 9.718533    | 11.26403    | Ankrd2      | 12.564035   | 10.524128   | 2.039907    | 2.039907    | 4.112109215 | Up in Atg <sup>10</sup> | Fasted | Ankrd2      |
| Zic1        | 3.7895445   | 6.4305453   | 3.0900522   | 3.0520964   | Zic1        | 5.11004459  | 3.0710508   | 2.0389951   | 2.0389951   | 4.11095918  | Up in Atg <sup>10</sup> | Fasted | Zic1        |
| Aco2        | 6.5082893   | 2.3881567   | 2.386167    | 2.438857    | Aco2        | 4.448223    | 2.4094953   | 2.0386295   | 2.0386295   | 4.108595051 | Up in Atg <sup>10</sup> | Fasted | Aco2        |
| Ragef4      | 7.209152    | 1.0994266   | 3.0504159   | 3.2050564   | Ragef4      | 5.1542893   | 3.1277386   | 2.0265511   | 2.0265511   | 4.07426856  | Up in Atg <sup>10</sup> | Fasted | Ragef4      |
| Amndhd1     | 6.6889215   | 2.7197973   | 2.6120608   | 2.7348865   | Amndhd1     | 4.7043494   | 2.67797365  | 2.02547575  | 2.02547575  | 4.071261106 | Up in Atg <sup>10</sup> | Fasted | Amndhd1     |
| Phnpl7      | 9.32316     | 9.616005    | 7.513422    | 7.412483    | Phnpl7      | 4.9659825   | 7.4629525   | 2.00663     | 2.00663     | 4.018424566 | Up in Atg <sup>10</sup> | Fasted | Phnpl7      |
| Cyp2d22     | 6.2682474   | 5.70086695  | 3.771147    | 4.1887685   | Cyp2d22     | 5.984557175 | 3.7999416   | 2.00461575  | 2.00461575  | 4.012817584 | Up in Atg <sup>10</sup> | Fasted | Cyp2d22     |
| Abcc3       | 7.155351    | 2.759202    | 3.176481    | 2.7559597   | Abcc3       | 4.9572765   | 2.9662305   | 1.99105615  | 1.99105615  | 3.975279089 | Up in Atg <sup>10</sup> | Fasted | Abcc3       |
| D10Wsu102e  | 6.0898565   | 2.1213593   | 3.4646351   | 3.7897296   | D10Wsu102e  | 5.0599229   | 3.62718235  | 1.98278055  | 1.98278055  | 3.952541335 | Up in Atg <sup>10</sup> | Fasted | D10Wsu102e  |
| Rhou        | 10.6898635  | 8.150792    | 7.791516    | 7.4617485   | Rhou        | 9.6094275   | 7.62660225  | 1.98277525  | 1.98277525  | 3.952533047 | Up in Atg <sup>10</sup> | Fasted | Rhou        |
| Pmn3        | 7.115597    | 8.13556167  | 5.998992    | 6.085746167 | Pmn3        | 8.02356083  | 6.042822683 | 1.980738    | 1.980738    | 3.946499334 | Up in Atg <sup>10</sup> | Fasted | Pmn3        |
| Pmnt        | 3.0908165   | 7.3196215   | 2.9468252   | 3.5003264   | Pmnt        | 5.2034119   | 3.223576075 | 1.979835825 | 1.979835825 | 3.94448192  | Up in Atg <sup>10</sup> | Fasted | Pmnt        |
| Krt8        | 6.23262167  | 2.256452167 | 2.240501133 | 2.29123467  | Krt8        | 4.244537667 | 2.2663423   | 1.978195367 | 1.978195367 | 3.939999282 | Up in Atg <sup>10</sup> | Fasted | Krt8        |
| Myc         | 8.591481    | 6.7079144   | 5.5862894   | 5.7573614   | Myc         | 7.6469077   | 5.6718254   | 1.9778723   | 1.9778723   | 3.939117086 | Up in Atg <sup>10</sup> | Fasted | Myc         |
| Cyp         | 9.455688929 | 4.67679014  | 5.428628443 | 4.759592257 | Cyp         | 7.066199421 | 5.0411035   | 1.97208071  | 1.97208071  | 3.92382353  | Up in Atg <sup>10</sup> | Fasted | Cyp         |
| Nipsnap1    | 6.47704885  | 2.40156555  | 2.157558    | 2.2498075   | Nipsnap1    | 4.4393072   | 2.47788823  | 1.966438925 | 1.966438925 | 3.90802921  | Up in Atg <sup>10</sup> | Fasted | Nipsnap1    |
| Acrv1b      | 9.724146    | 11.649883   | 8.760345    | 8.760345    | Acrv1b      | 10.6707645  | 8.760345    | 1.96430119  | 1.96430119  | 3.90139119  | Up in Atg <sup>10</sup> | Fasted | Acrv1b      |
| Scdmol      | 9.557418    | 5.090132    | 6.124426    | 4.6505685   | Scdmol      | 7.323775    | 5.36504725  | 1.95827775  | 1.95827775  | 3.887190334 | Up in Atg <sup>10</sup> | Fasted | Scdmol      |
| Lcat        | 6.219027    | 2.328957    | 2.29027     | 2.3436642   | Lcat        | 4.274082    | 2.3169671   | 1.9571149   | 1.9571149   | 3.882847107 | Up in Atg <sup>10</sup> | Fasted | Lcat        |
| Hnf4a       | 6.3110227   | 2.3720151   | 2.343335225 | 2.427266375 | Hnf4a       | 4.3415189   | 2.3853008   | 1.9562181   | 1.9562181   | 3.880434223 | Up in Atg <sup>10</sup> | Fasted | Hnf4a       |
| Arid5a      | 5.142973    | 2.3352515   | 3.2659135   | 3.202104    | Arid5a      | 5.1882475   | 3.23400875  | 1.9542385   | 1.9542385   | 3.875113321 | Up in Atg <sup>10</sup> | Fasted | Arid5a      |
| Cidec       | 6.67895     | 7.914032    | 6.9392686   | 7.351633    | Cidec       | 7.296491    | 5.3454058   | 1.9510402   | 1.9510402   | 3.866531226 | Up in Atg <sup>10</sup> | Fasted | Cidec       |
| Rorc        | 6.5765835   | 7.8582939   | 5.205923    | 5.3268885   | Rorc        | 7.1747145   | 5.2671404   | 1.9502711   | 1.9502711   | 3.864471429 | Up in Atg <sup>10</sup> | Fasted | Rorc        |
| Chr1        | 7.112573    | 3.219853    | 3.152075    | 2.986776    | Chr1        | 5.166213    | 2.2587875   | 1.9403977   | 1.9403977   | 3.837954745 | Up in Atg <sup>10</sup> | Fasted | Chr1        |
| Acaab1b     | 7.451222    | 2.8086176   | 3.982109    | 2.4005237   | Acaab1b     | 5.1299198   | 3.19131635  | 1.93860345  | 1.93860345  | 3.83343947  | Up in Atg <sup>10</sup> | Fasted | Acaab1b     |
| Cbs         | 6.33648525  | 2.4957317   | 2.43411305  | 2.52407795  | Cbs         | 4.416108475 | 2.4790955   | 1.937012975 | 1.937012975 | 3.82912027  | Up in Atg <sup>10</sup> | Fasted | Cbs         |
| Zfp410      | 8.1315805   | 9.634308    | 6.850382    | 7.043072    | Zfp410      | 8.88294425  | 6.9468946   | 1.93604965  | 1.93604965  | 3.82656432  | Up in Atg <sup>10</sup> | Fasted | Zfp410      |
| C8g         | 5.989571    | 3.8395087   | 5.2774625   | 4.2818756   | C8g         | 6.71231485  | 4.7796905   | 1.9326458   | 1.9326458   | 3.817546685 | Up in Atg <sup>10</sup> | Fasted | C8g         |
| D16h225680E | 9.075525    | 9.646066    | 7.324232    | 7.546056    | D16h225680E | 9.36081425  | 7.435144    | 1.92567025  | 1.92567025  | 3.799133082 | Up in Atg <sup>10</sup> | Fasted | D16h225680E |
| Mgea5       | 7.7902693   | 7.9423874   | 5.8623015   | 6.02079904  | Mgea5       | 7.86675402  | 5.94515012  | 1.9252039   | 1.9252039   | 3.797905214 | Up in Atg <sup>10</sup> | Fasted | Mgea5       |
| Gta2        | 6.631053    | 2.7475014   | 2.701857    | 2.7939889   | Gta2        | 4.4892772   | 2.7647876   | 1.9244955   | 1.9244955   | 3.780231448 | Up in Atg <sup>10</sup> | Fasted | Gta2        |
| Ccb2        | 9.853893    | 6.8885627   | 6.4624047   | 6.4423842   | Ccb2        | 8.37122785  | 6.45239445  | 1.9188334   | 1.9188334   | 3.781171798 | Up in Atg <sup>10</sup> | Fasted | Ccb2        |
| Vmn3        | 7.0321185   | 3.1097608   | 3.1388068   | 3.1662087   | Vmn3        | 5.07048965  | 3.15250775  | 1.9179819   | 1.9179819   | 3.778940753 | Up in Atg <sup>10</sup> | Fasted | Vmn3        |
| Ptpad1      | 9.433654    | 9.2704595   | 7.6052077   | 7.278382    | Ptpad1      | 9.35205675  | 7.44179485  | 1.9102619   | 1.9102619   | 3.758773285 | Up in Atg <sup>10</sup> | Fasted | Ptpad1      |
| Por         | 8.589516    | 5.373151    | 5.3678293   | 4.809537    | Por         | 6.9813335   | 5.08868315  | 1.89265035  | 1.89265035  | 3.713167381 | Up in Atg <sup>10</sup> | Fasted | Por         |
| Phidat1     | 3.3441195   | 9.28081     | 7.140358    | 6.7121064   | Phidat1     | 8.81261475  | 6.96232325  | 1.8863824   | 1.8863824   | 3.697070103 | Up in Atg <sup>10</sup> | Fasted | Phidat1     |
| Lmod2       | 13.138499   | 13.05059    | 11.384674   | 11.39284    | Lmod2       | 13.084755   | 11.138658   | 1.885896    | 1.885896    | 3.695823658 | Up in Atg <sup>10</sup> | Fasted | Lmod2       |
| Hsot1       | 12.919217   | 12.122915   | 2.1015847   | 2.1712089   | Hsot1       | 4.0179125   | 2.1377125   | 1.88157725  | 1.88157725  | 3.684758844 | Up in Atg <sup>10</sup> | Fasted | Hsot1       |
| Sufl1a1     | 11.723336   | 9.9592783   | 9.113621    | 8.8402      | Sufl1a1     | 10.5880595  | 8.9769105   | 1.881149    | 1.881149    | 3.683683216 | Up in Atg <sup>10</sup> | Fasted | Sufl1a1     |
| Apola9a     | 6.7059116   | 2.9797242   | 2.88808     | 3.042089    | Apola9a     | 4.8428179   | 2.9650845   | 1.8777334   | 1.8777334   | 3.674972362 | Up in Atg <sup>10</sup> | Fasted | Apola9a     |
| Hectd1      | 12.275521   | 13.162074   | 10.846077   | 10.863489   | Hectd1      | 12.7187975  | 10.854783   |             |             |             |                         |        |             |

|                |             |            |             |             |  |                |             |             |             |             |             |                           |        |               |
|----------------|-------------|------------|-------------|-------------|--|----------------|-------------|-------------|-------------|-------------|-------------|---------------------------|--------|---------------|
| A930001N09RIK* | 7.3291648   | 8.3109653  | 6.11251545  | 6.09116225  |  | A930001N09RIK* | 7.82006505  | 6.10183885  | 1.7182262   | 1.7182262   | 3.290316123 | Up, in, Atg <sup>65</sup> | Fasted | A930001N09RIK |
| Hsd11b1*       | 10.659297   | 7.586078   | 7.1211576   | 7.694013    |  | Hsd11b1*       | 9.1226875   | 7.4075853   | 1.7151022   | 1.7151022   | 3.283190008 | Up, in, Atg <sup>65</sup> | Fasted | Hsd11b1       |
| Cyp51*         | 7.1668285   | 3.11152155 | 3.692422    | 3.1598572   |  | Cyp51*         | 5.139175025 | 3.4261396   | 1.713035425 | 1.713035425 | 3.278498932 | Up, in, Atg <sup>65</sup> | Fasted | Cyp51         |
| Zfp932*        | 7.8770013   | 9.248879   | 6.9061904   | 6.802736    |  | Zfp932*        | 8.56269015  | 6.854632    | 1.70822695  | 1.70822695  | 3.267589948 | Up, in, Atg <sup>65</sup> | Fasted | Zfp932        |
| Tmem97*        | 6.453506    | 3.297173   | 3.356666    | 2.9835873   |  | Tmem97*        | 4.8751395   | 3.17012695  | 1.70521255  | 1.70521255  | 3.260769698 | Up, in, Atg <sup>65</sup> | Fasted | Tmem97        |
| Tifa*          | 5.5893993   | 2.1743495  | 2.178267    | 2.1781626   |  | Tifa*          | 3.8818744   | 2.1782148   | 1.7036596   | 1.7036596   | 3.25726162  | Up, in, Atg <sup>65</sup> | Fasted | Tifa          |
| Cd68*          | 8.368037    | 3.9753315  | 5.5345707   | 3.4088051   |  | Cd68*          | 6.17168425  | 4.4716879   | 1.6999635   | 1.6999635   | 3.249001365 | Up, in, Atg <sup>65</sup> | Fasted | Cd68          |
| Gys2*          | 5.7561603   | 2.3003016  | 2.3035107   | 2.355623    |  | Gys2*          | 4.02823095  | 2.32956685  | 1.6986641   | 1.6986641   | 3.246002475 | Up, in, Atg <sup>65</sup> | Fasted | Gys2          |
| Sertad2*       | 8.18558885  | 9.4866255  | 6.870873    | 7.40873     |  | Sertad2*       | 8.836107175 | 7.1398015   | 1.696305675 | 1.696305675 | 3.240700454 | Up, in, Atg <sup>65</sup> | Fasted | Sertad2       |
| Keg1*          | 5.266463    | 1.9512166  | 1.8832788   | 1.9437498   |  | Keg1*          | 3.6088398   | 1.9135143   | 1.6951255   | 1.6951255   | 3.238499452 | Up, in, Atg <sup>65</sup> | Fasted | Keg1          |
| Abhd3*         | 6.9313834   | 3.1111453  | 3.3188003   | 3.333538    |  | Abhd3*         | 5.02136435  | 3.32611413  | 1.6952502   | 1.6952502   | 3.238330426 | Up, in, Atg <sup>65</sup> | Fasted | Abhd3         |
| Cyp19*         | 5.870963    | 2.5293996  | 2.5839935   | 2.42114515  |  | Cyp19*         | 4.1974513   | 2.50256975  | 1.69488155  | 1.69488155  | 3.237503046 | Up, in, Atg <sup>65</sup> | Fasted | Cyp19         |
| Taf7*          | 5.9169395   | 7.9753905  | 5.5447798   | 4.970104    |  | Taf7*          | 6.946165    | 5.2574419   | 1.6887231   | 1.6887231   | 3.223712532 | Up, in, Atg <sup>65</sup> | Fasted | Taf7          |
| Bhmt*          | 11.465633   | 3.1372366  | 8.240874    | 2.9865336   |  | Bhmt*          | 7.3014348   | 5.6137038   | 1.687731    | 1.687731    | 3.221496439 | Up, in, Atg <sup>65</sup> | Fasted | Bhmt          |
| Pm20d1*        | 6.5272026   | 2.935048   | 2.9587631   | 3.1298583   |  | Pm20d1*        | 4.7311253   | 3.0443107   | 1.6868146   | 1.6868146   | 3.219450794 | Up, in, Atg <sup>65</sup> | Fasted | Pm20d1        |
| Iffm1*         | 7.0011277   | 5.5796165  | 4.5927577   | 4.6283293   |  | Iffm1*         | 6.2903721   | 4.6105435   | 1.6798286   | 1.6798286   | 3.203898847 | Up, in, Atg <sup>65</sup> | Fasted | Iffm1         |
| Foxa3*         | 5.7058077   | 2.3186707  | 2.2865205   | 2.3808756   |  | Foxa3*         | 4.0122392   | 2.33369805  | 1.67854115  | 1.67854115  | 3.201040988 | Up, in, Atg <sup>65</sup> | Fasted | Foxa3         |
| Adm*           | 6.9841296   | 6.933284   | 5.4487214   | 5.12177     |  | Adm*           | 6.95879     | 5.2852457   | 1.6735443   | 1.6735443   | 3.189971192 | Up, in, Atg <sup>65</sup> | Fasted | Adm           |
| Prodh*         | 7.766694    | 6.951004   | 5.477513    | 5.8931437   |  | Prodh*         | 7.358849    | 5.68532835  | 1.67352065  | 1.67352065  | 3.1899209   | Up, in, Atg <sup>65</sup> | Fasted | Prodh         |
| Txnip*         | 12.09998775 | 12.6045475 | 10.7287175  | 10.62905    |  | Txnip*         | 12.35226763 | 10.67888375 | 1.673383875 | 1.673383875 | 3.189618493 | Up, in, Atg <sup>65</sup> | Fasted | Txnip         |
| Atf3*          | 8.860957    | 6.5882754  | 6.4357953   | 5.666789    |  | Atf3*          | 7.7246162   | 6.05129215  | 1.67332405  | 1.67332405  | 3.18948623  | Up, in, Atg <sup>65</sup> | Fasted | Atf3          |
| Chi3l3*        | 5.95695325  | 2.581752   | 2.5591884   | 2.63354385  |  | Chi3l3*        | 4.269355225 | 2.596366125 | 1.6729891   | 1.6729891   | 3.188745814 | Up, in, Atg <sup>65</sup> | Fasted | Chi3l3        |
| Fbxo31*        | 8.056827    | 7.666117   | 6.1164036   | 6.2686176   |  | Fbxo31*        | 7.861472    | 6.1925106   | 1.6689614   | 1.6689614   | 3.179855924 | Up, in, Atg <sup>65</sup> | Fasted | Fbxo31        |
| C3*            | 14.575293   | 9.245957   | 11.777861   | 9.315984    |  | C3*            | 11.910625   | 10.2469225  | 1.6637025   | 1.6637025   | 3.16828584  | Up, in, Atg <sup>65</sup> | Fasted | C3            |
| Plin5*         | 7.534295    | 7.94138    | 5.42997     | 6.715416    |  | Plin5*         | 7.737875    | 6.0762005   | 1.653631    | 1.653631    | 3.168128824 | Up, in, Atg <sup>65</sup> | Fasted | Plin5         |
| Cldn2*         | 5.8400707   | 2.4731696  | 2.472973    | 2.5166616   |  | Cldn2*         | 4.15662015  | 2.49452945  | 1.6620907   | 1.6620907   | 3.164748161 | Up, in, Atg <sup>65</sup> | Fasted | Cldn2         |
| Trim39*        | 6.011821    | 7.1962905  | 4.958785    | 4.9416327   |  | Trim39*        | 6.60405575  | 4.95020885  | 1.6538469   | 1.6538469   | 3.146715832 | Up, in, Atg <sup>65</sup> | Fasted | Trim39        |
| Hspb1*         | 13.1943     | 13.1781865 | 11.7631925  | 11.3064605  |  | Hspb1*         | 13.18624325 | 11.5348265  | 1.65141675  | 1.65141675  | 3.141419803 | Up, in, Atg <sup>65</sup> | Fasted | Hspb1         |
| Rprd1b*        | 8.1080823   | 9.723208   | 7.2247867   | 7.318783    |  | Rprd1b*        | 8.91569015  | 7.27178485  | 1.6439053   | 1.6439053   | 3.125106379 | Up, in, Atg <sup>65</sup> | Fasted | Rprd1b        |
| Ctdp1*         | 6.9909043   | 7.9776325  | 5.7618694   | 5.928168    |  | Ctdp1*         | 7.4842684   | 5.8450187   | 1.6392497   | 1.6392497   | 3.115037865 | Up, in, Atg <sup>65</sup> | Fasted | Ctdp1         |
| Tenc1*         | 8.052136    | 9.265005   | 7.223433    | 6.8224845   |  | Tenc1*         | 8.6566805   | 7.02295875  | 1.63572175  | 1.63572175  | 3.107428693 | Up, in, Atg <sup>65</sup> | Fasted | Tenc1         |
| Aupr1a*        | 9.84608935  | 2.6514678  | 2.58435775  | 2.642361    |  | Aupr1a*        | 4.248753075 | 2.61339975  | 1.6353937   | 1.6353937   | 3.106723184 | Up, in, Atg <sup>65</sup> | Fasted | Aupr1a        |
| Bnip3*         | 13.281464   | 13.965618  | 11.899755   | 12.077023   |  | Bnip3*         | 13.623541   | 11.988389   | 1.635152    | 1.635152    | 3.106202747 | Up, in, Atg <sup>65</sup> | Fasted | Bnip3         |
| Prodh2*        | 5.509754    | 2.2094154  | 2.186838    | 2.2769358   |  | Prodh2*        | 3.8595847   | 2.2318869   | 1.6276978   | 1.6276978   | 3.090194831 | Up, in, Atg <sup>65</sup> | Fasted | Prodh2        |
| Inmt*          | 10.144497   | 10.912414  | 8.41865     | 9.384169    |  | Inmt*          | 10.5284555  | 8.9014095   | 1.627046    | 1.627046    | 3.088799016 | Up, in, Atg <sup>65</sup> | Fasted | Inmt          |
| Mknk2*         | 10.46621275 | 10.213399  | 8.5106215   | 8.921536    |  | Mknk2*         | 10.33980588 | 8.71607875  | 1.623727125 | 1.623727125 | 3.081701497 | Up, in, Atg <sup>65</sup> | Fasted | Mknk2         |
| Sic16a7*       | 6.690667    | 3.019865   | 3.4056122   | 3.0637116   |  | Sic16a7*       | 4.855266    | 3.2346619   | 1.6206041   | 1.6206041   | 3.075037704 | Up, in, Atg <sup>65</sup> | Fasted | Sic16a7       |
| Gm3579*        | 6.1357041   | 3.2484839  | 3.1849936   | 2.9589147   |  | Gm3579*        | 4.692094    | 3.07195425  | 1.62013975  | 1.62013975  | 3.074048123 | Up, in, Atg <sup>65</sup> | Fasted | Gm3579        |
| Tmbim1*        | 9.997625    | 10.4538585 | 8.866782    | 8.349166    |  | Tmbim1*        | 10.22474175 | 8.607974    | 1.61676775  | 1.61676775  | 3.066871564 | Up, in, Atg <sup>65</sup> | Fasted | Tmbim1        |
| Srxn1*         | 6.80996067  | 5.3955986  | 4.375422    | 4.59758833  |  | Srxn1*         | 6.102779733 | 4.486466017 | 1.616313717 | 1.616313717 | 3.065906535 | Up, in, Atg <sup>65</sup> | Fasted | Srxn1         |
| Mustn1*        | 11.733652   | 11.302767  | 10.314533   | 9.489803    |  | Mustn1*        | 11.5182095  | 9.902168    | 1.6160415   | 1.6160415   | 3.065328095 | Up, in, Atg <sup>65</sup> | Fasted | Mustn1        |
| Cyp4v3*        | 8.09251025  | 3.0572965  | 4.3252753   | 3.59473845  |  | Cyp4v3*        | 5.574903375 | 3.960006875 | 1.6148965   | 1.6148965   | 3.062896252 | Up, in, Atg <sup>65</sup> | Fasted | Cyp4v3        |
| Plind*         | 11.939097   | 13.009047  | 11.226418   | 10.507611   |  | Plind*         | 12.474072   | 10.8670145  | 1.6070575   | 1.6070575   | 3.04629889  | Up, in, Atg <sup>65</sup> | Fasted | Plind         |
| Cyp27a1*       | 10.541935   | 10.462709  | 8.653809    | 9.138785    |  | Cyp27a1*       | 10.502322   | 8.896297    | 1.606025    | 1.606025    | 3.044119512 | Up, in, Atg <sup>65</sup> | Fasted | Cyp27a1       |
| 1230401017RIK* | 10.482146   | 11.325353  | 9.209881    | 9.399942    |  | 1230401017RIK* | 10.9017495  | 9.3049115   | 1.598818    | 1.598818    | 3.028950497 | Up, in, Atg <sup>65</sup> | Fasted | 1230401017RIK |
| Klf6*          | 9.399265333 | 9.2165388  | 7.61832667  | 7.805053433 |  | Klf6*          | 9.307902067 | 7.71171805  | 1.596184017 | 1.596184017 | 3.023425472 | Up, in, Atg <sup>65</sup> | Fasted | Klf6          |
| Glyat*         | 6.304214    | 3.2019878  | 3.093929467 | 3.20384633  |  | Glyat*         | 4.75310009  | 3.16238705  | 1.59071385  | 1.59071385  | 3.011983465 | Up, in, Atg <sup>65</sup> | Fasted | Glyat         |
| Zfp259*        | 6.9952909   | 7.345624   | 5.63534725  | 5.5336702   |  | Zfp259*        | 7.17045745  | 5.584508725 | 1.585948725 | 1.585948725 | 3.002051497 | Up, in, Atg <sup>65</sup> | Fasted | Zfp259        |
| Sic15a3*       | 5.275285    | 2.0343876  | 2.0430722   | 2.0949116   |  | Sic15a3*       | 3.6548363   | 2.0689919   | 1.5858444   | 1.5858444   | 3.001834410 | Up, in, Atg <sup>65</sup> | Fasted | Sic15a3       |
